# Supplementary material for: Quantitative Proteome Analysis of Temporally Resolved Phagosomes Following Uptake Via Key Phagocytic Receptors
Source: PubMed Central journal article supplement (PMC4424403; doi:10.1074/mcp.m114.044594), 2015-05

0610031j06rik (Q9JHJ3)

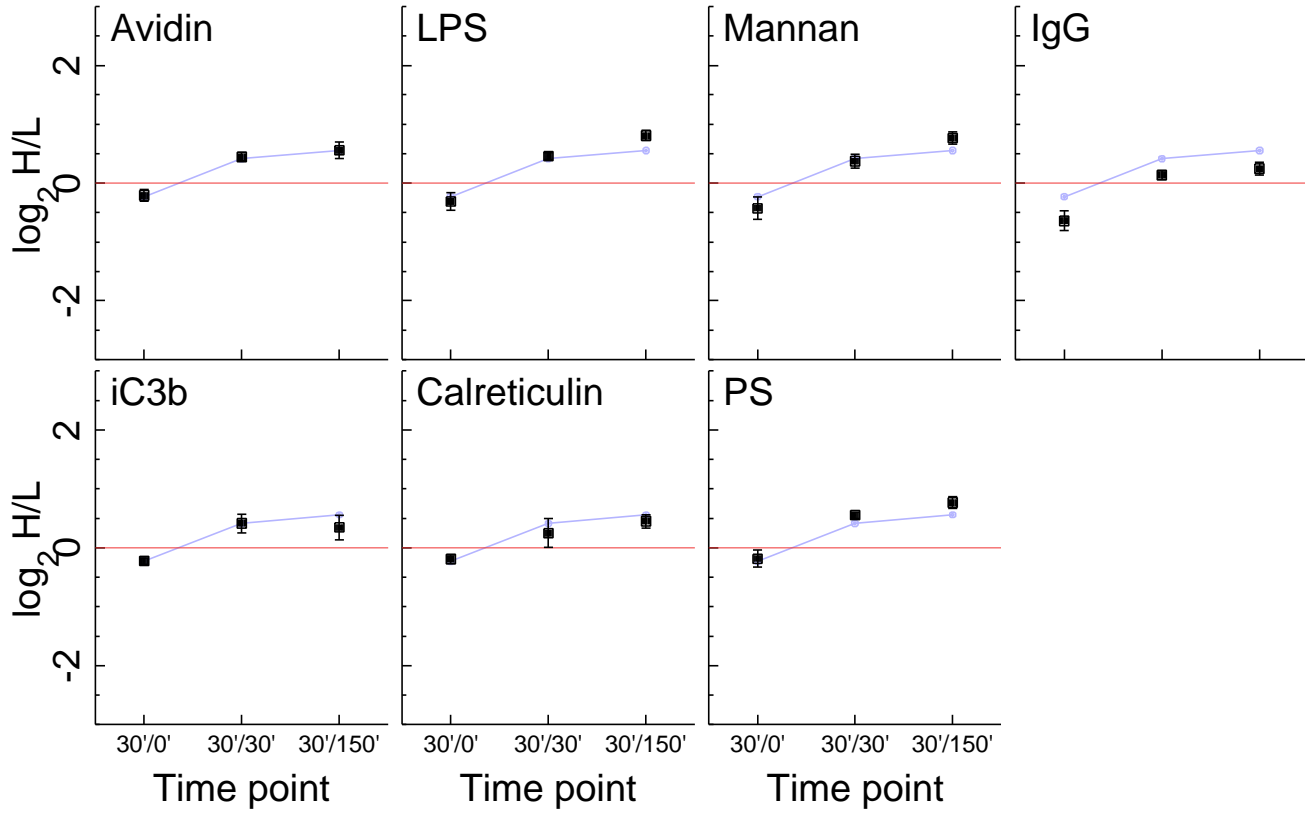

### 1700112e06rik (Q9D9B4)

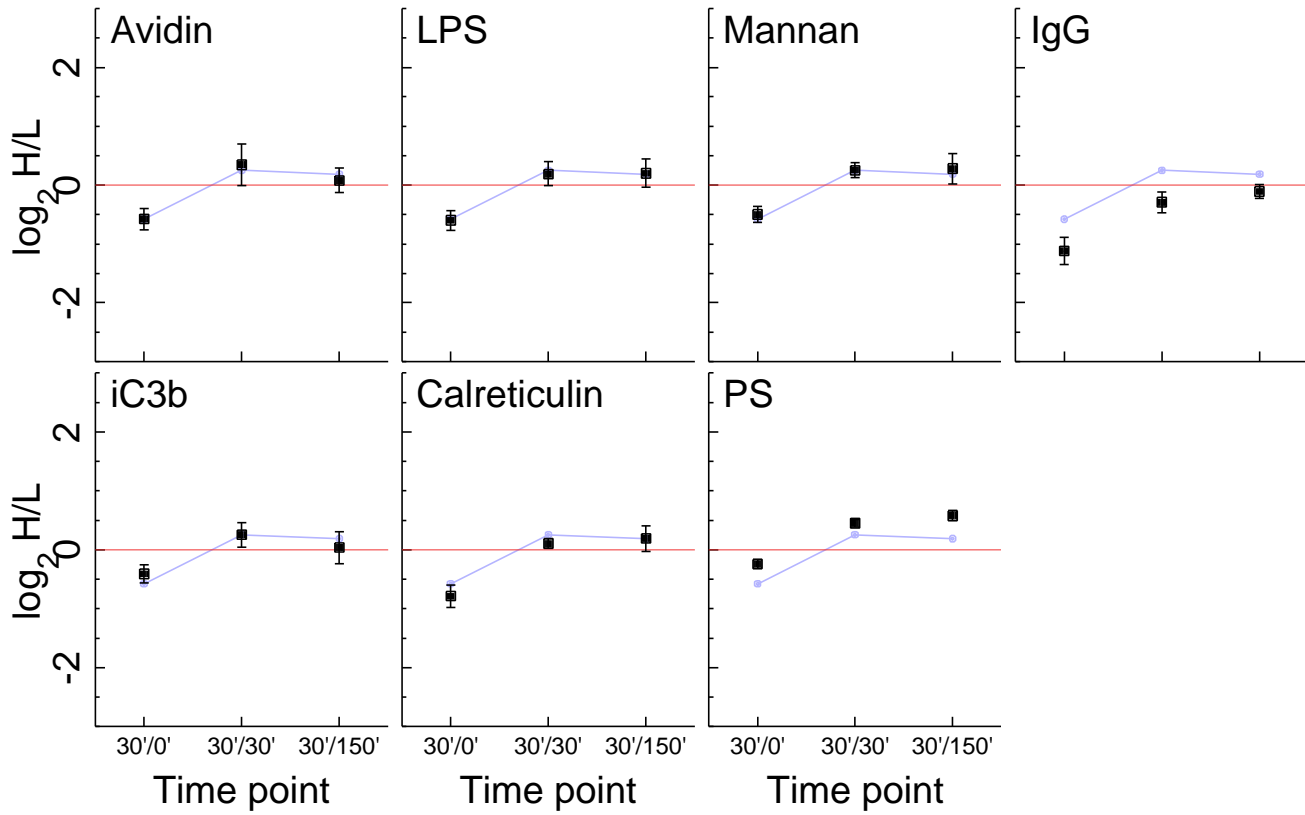

### 2310022a10rik (G5E8E3)

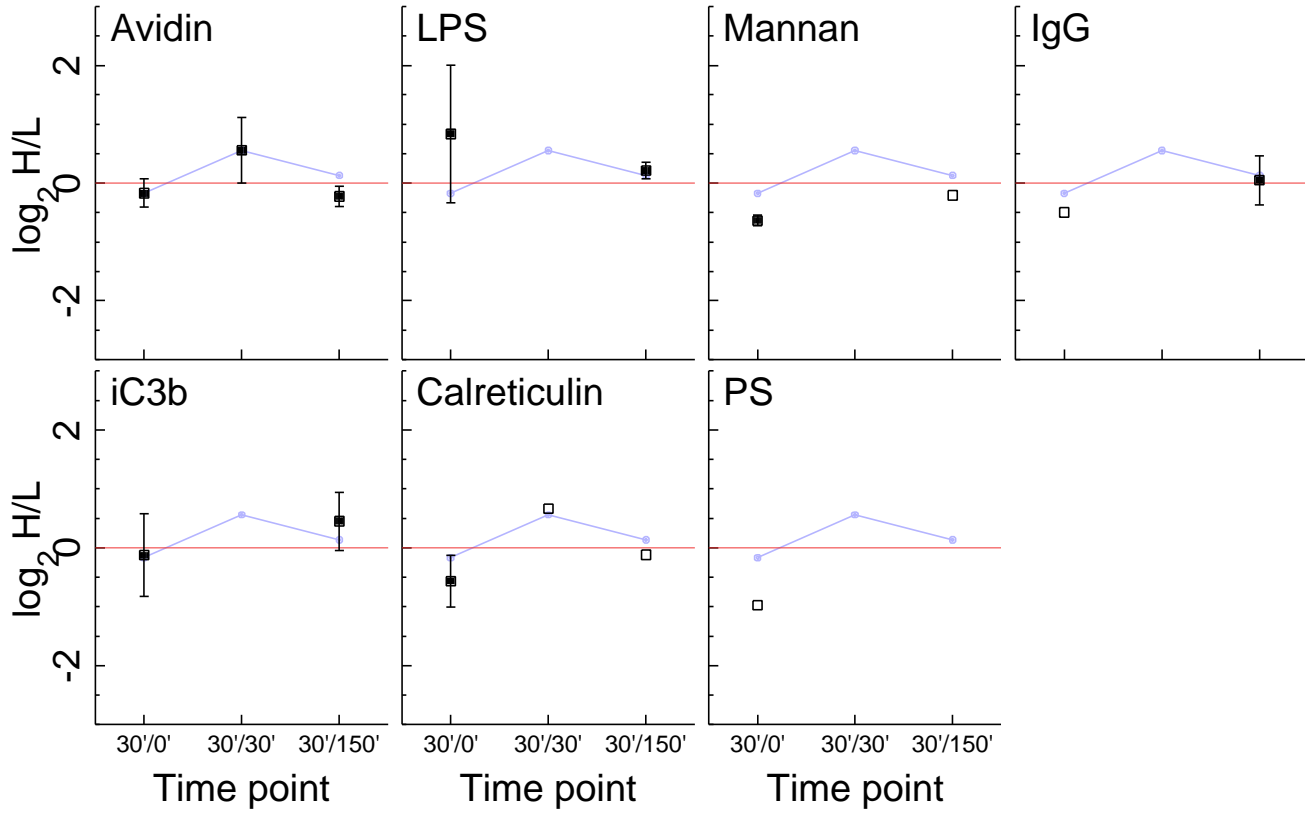

2410018m08rik (B2RPU8)

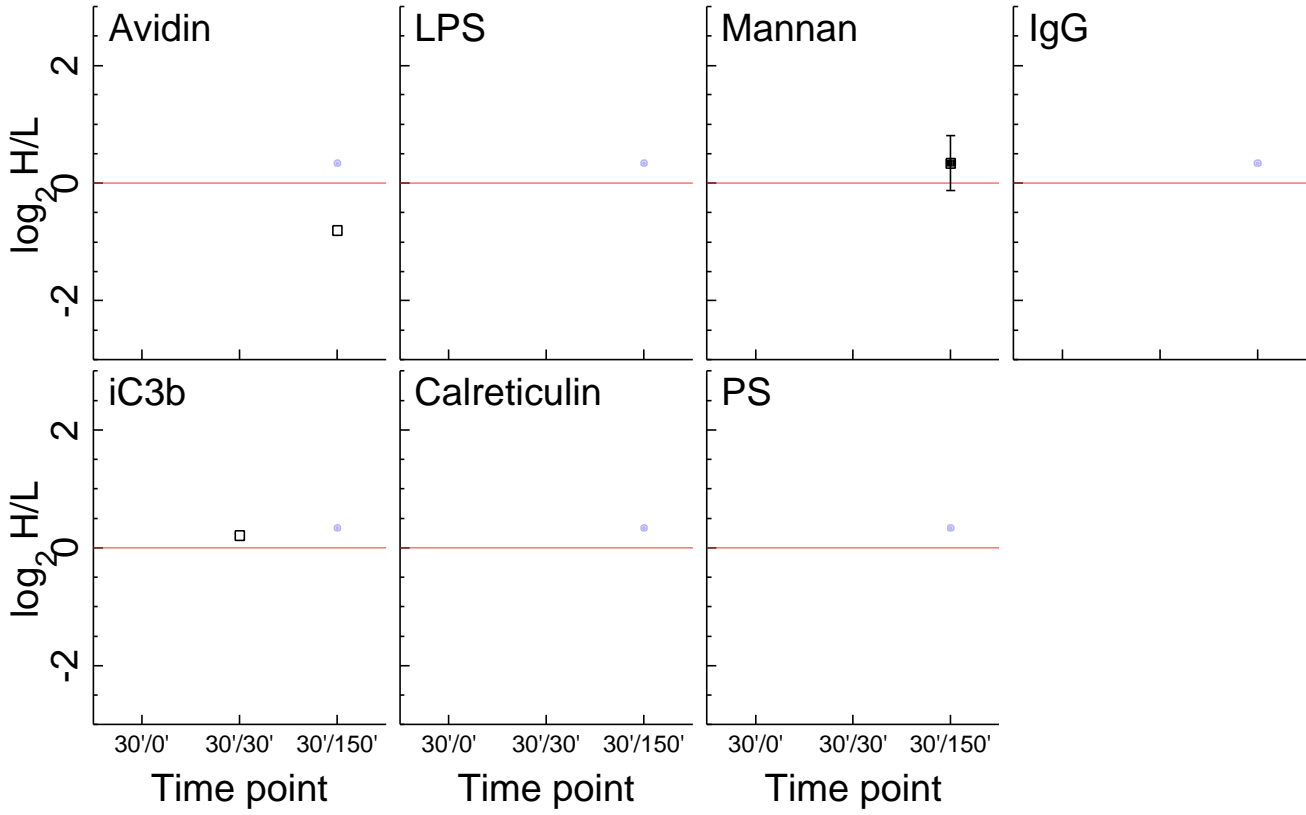



### 2810422j05rik (E9QNP0)

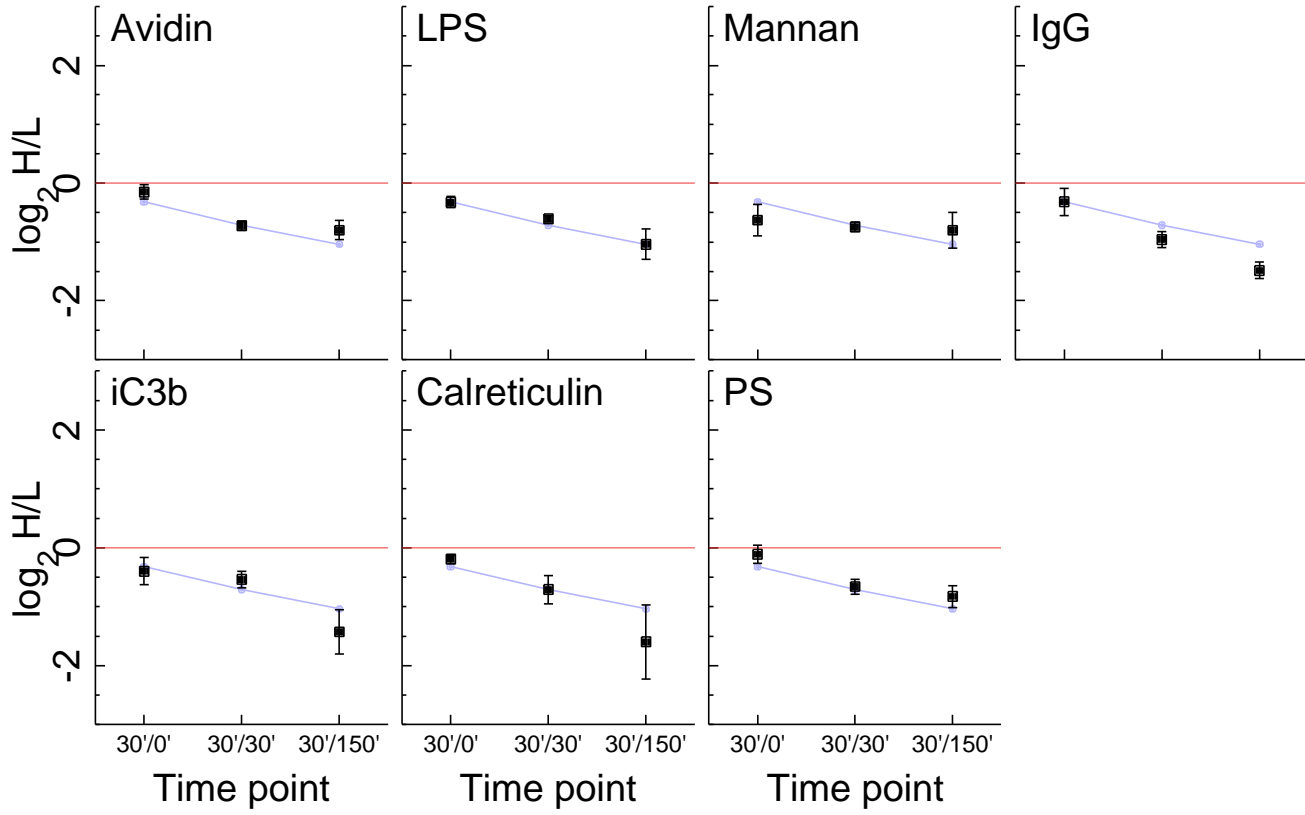

4632428n05rik (Q9D659)

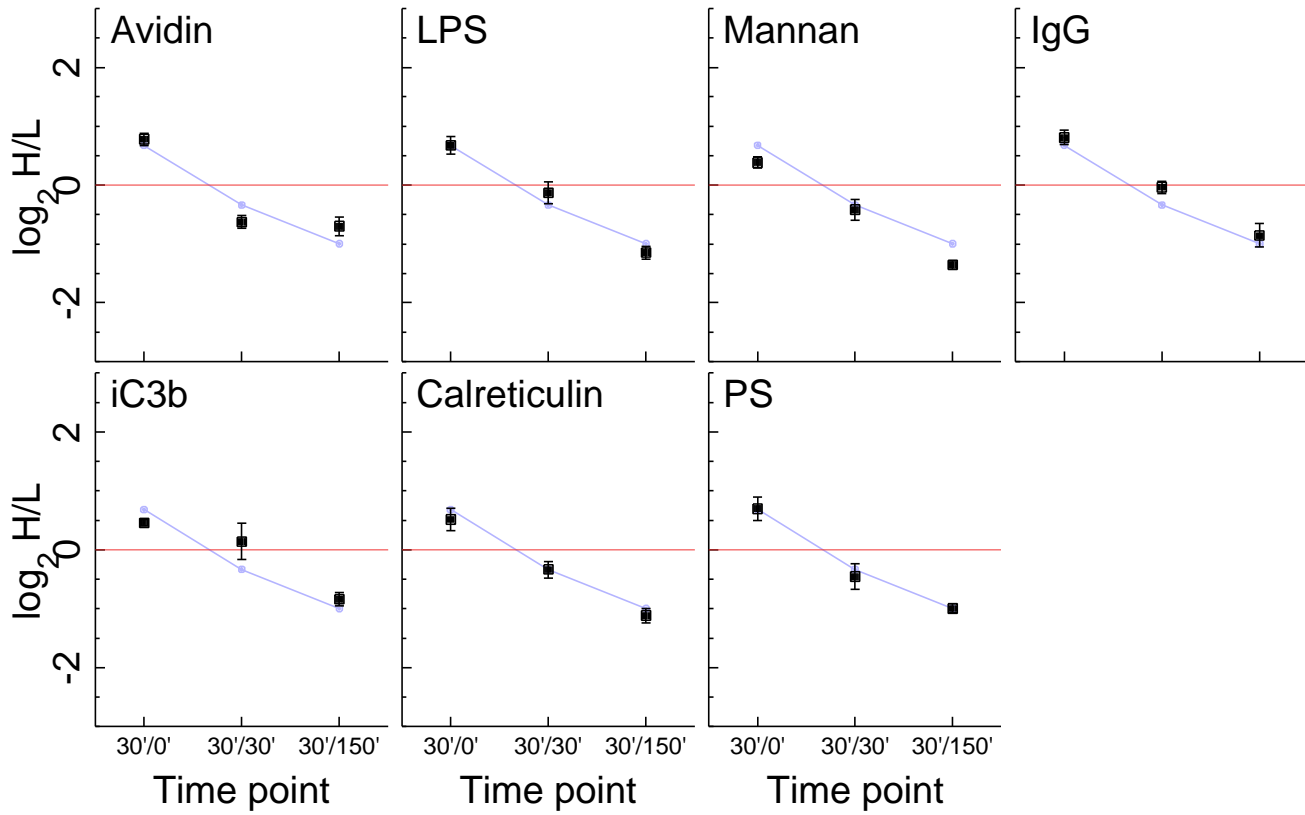

### 4732456n10rik (E9Q1Z0)

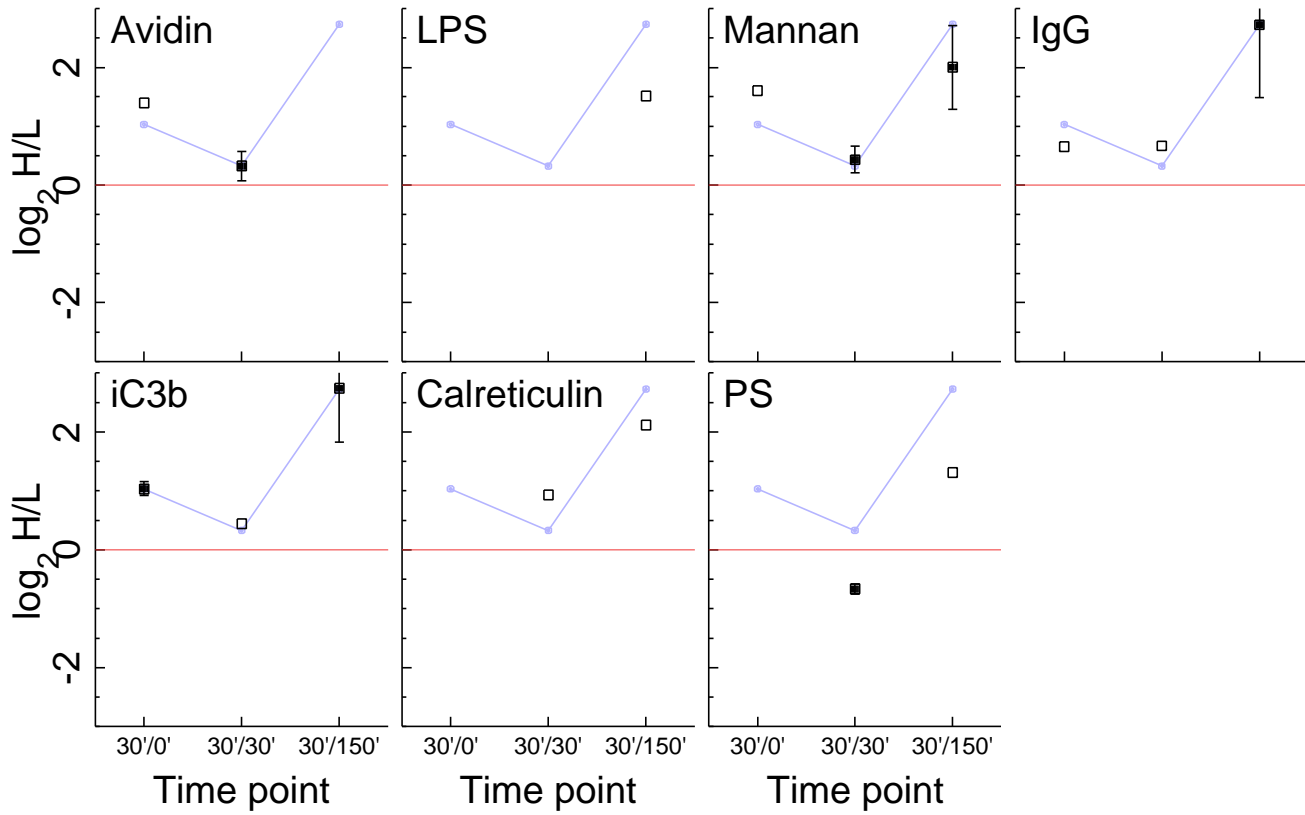

### 5031439g07rik (B1APX2)

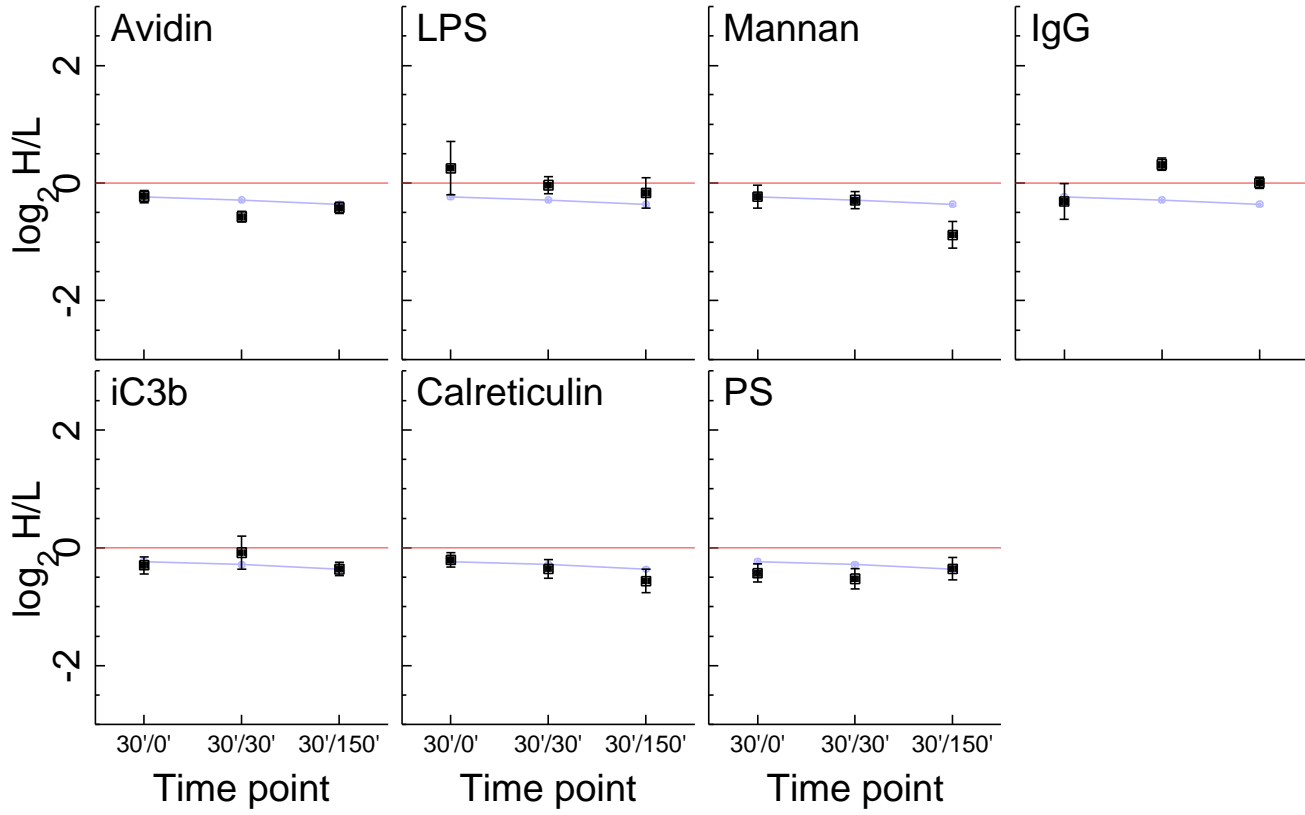

### 9030624j02rik (I1E4X5)

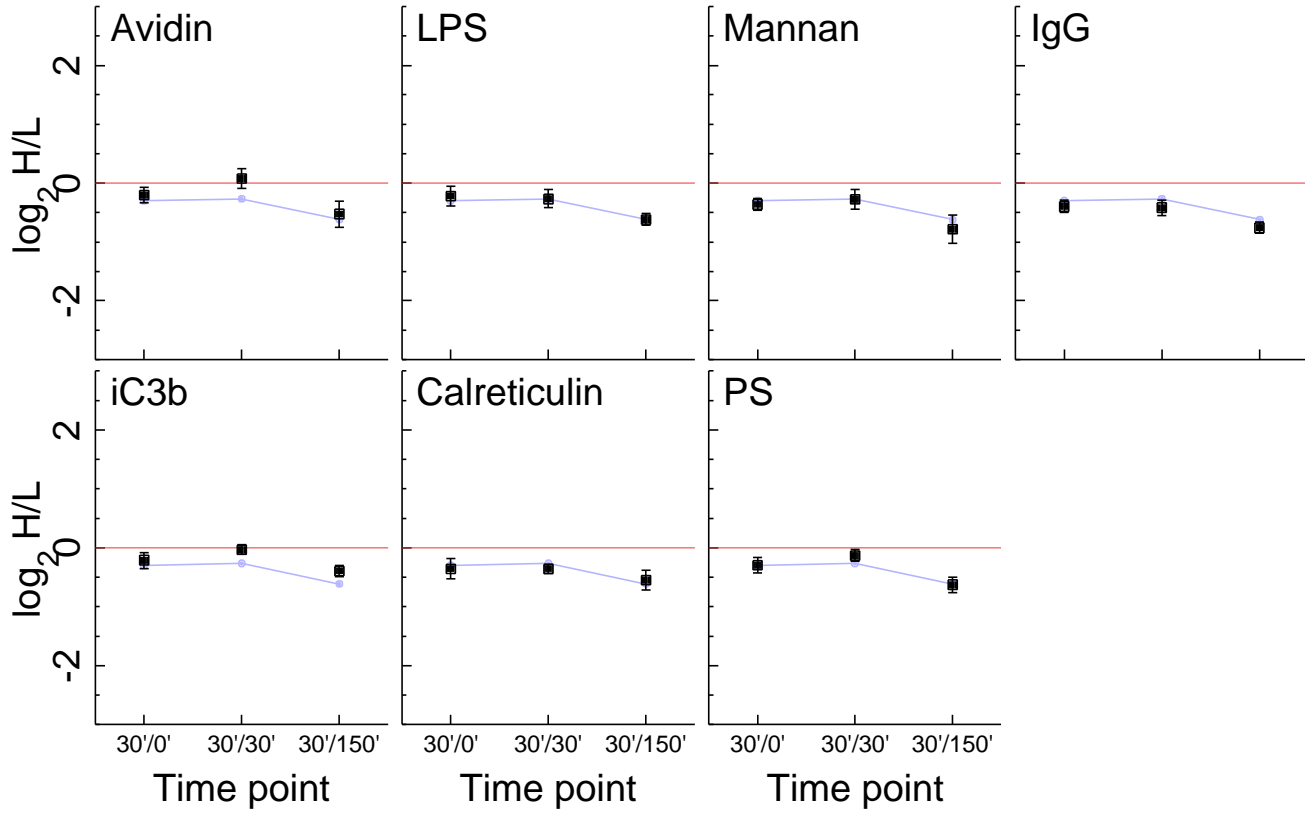

### aak1 (Q3UHJ0)

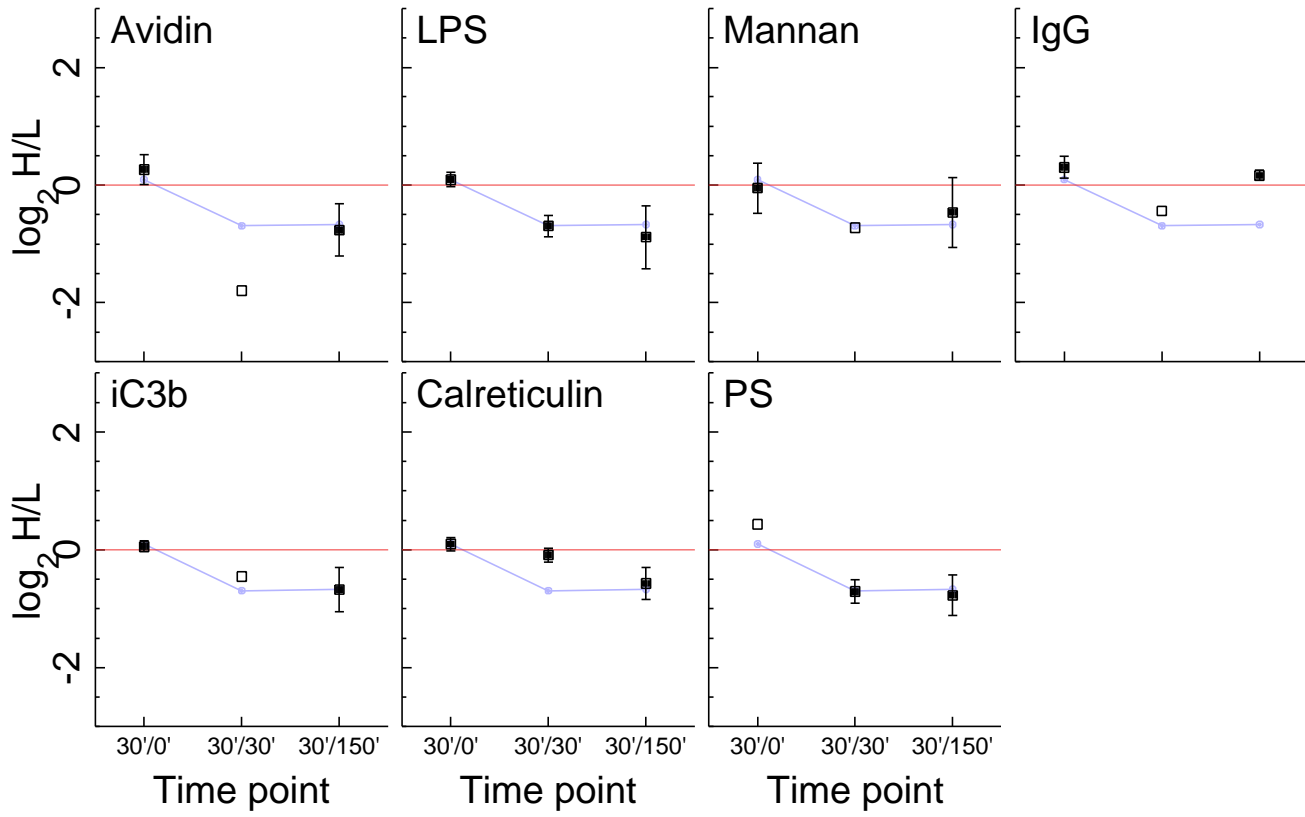

abca3 (Q8R420)

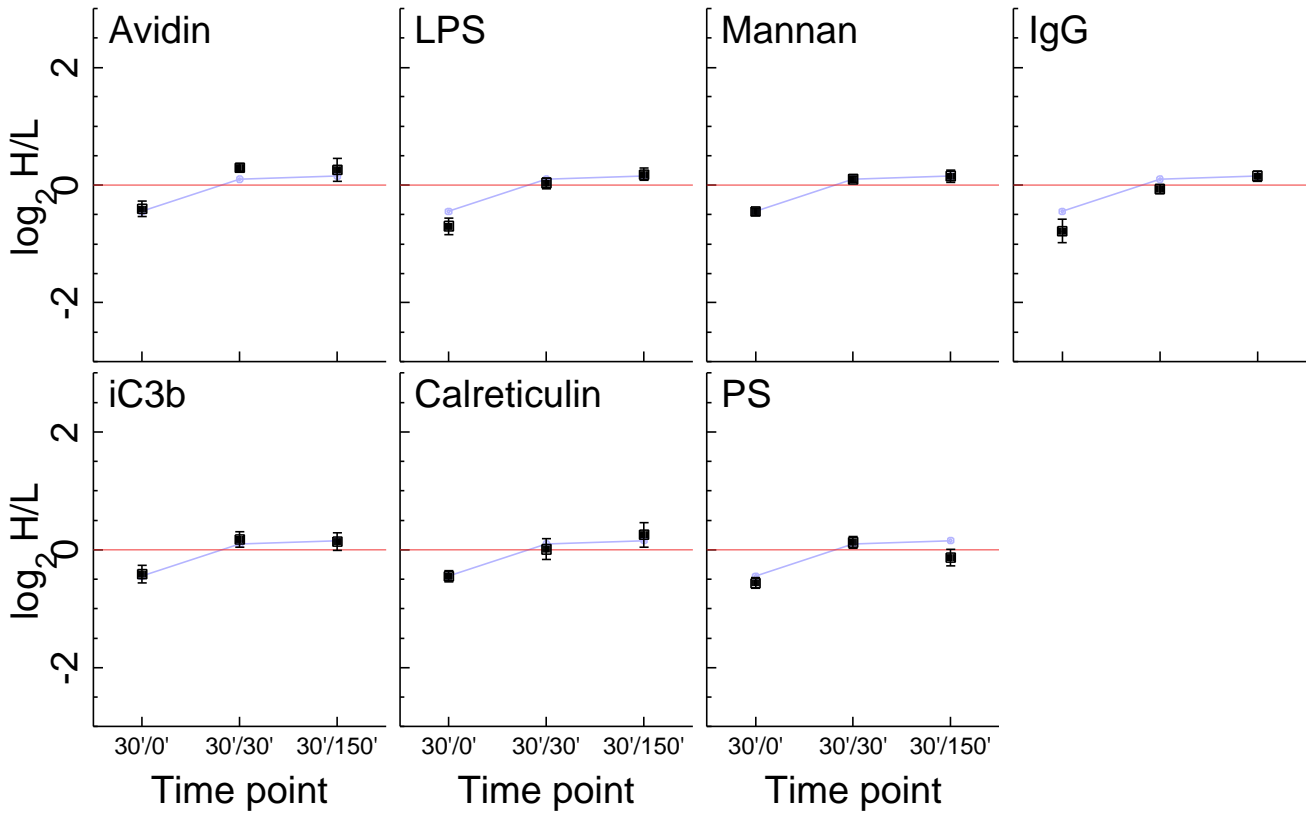

abcb11 (J3QNY6)

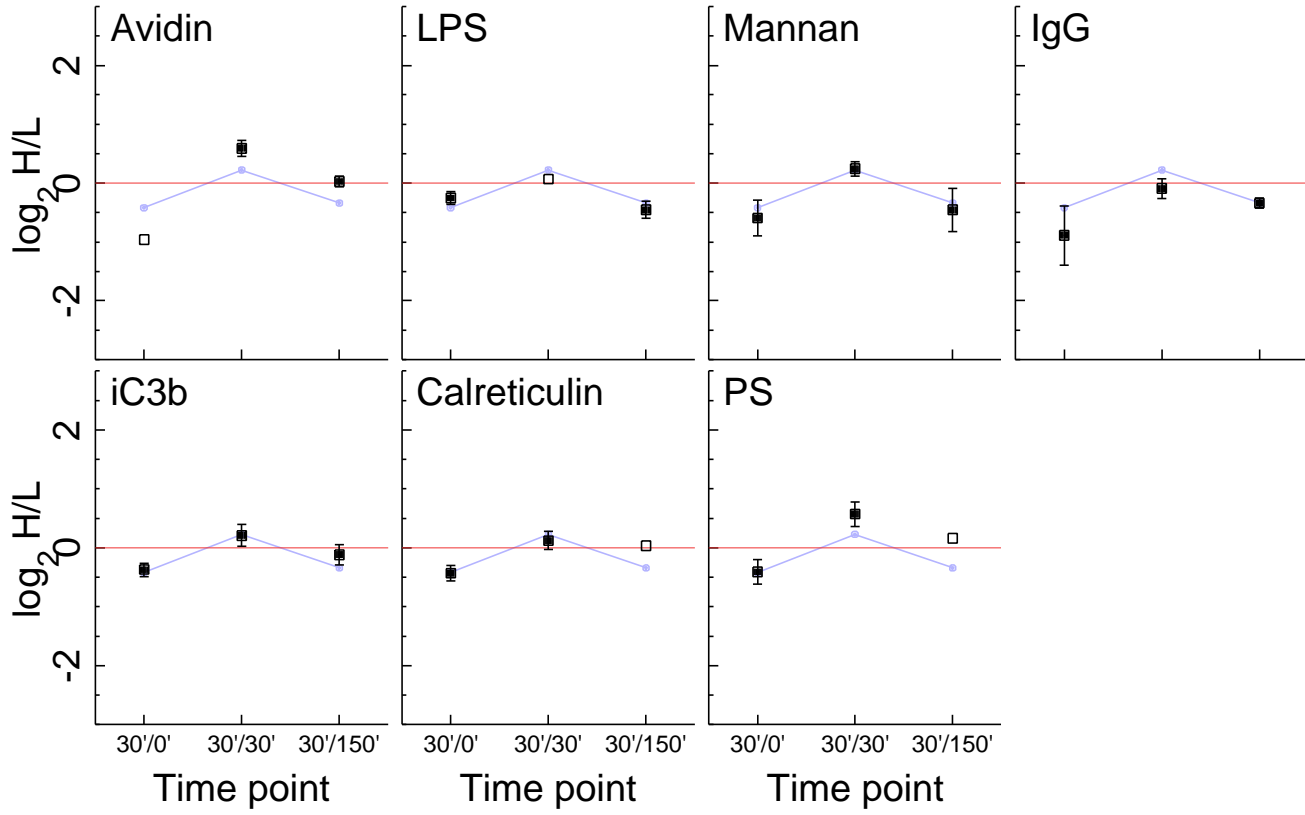



### abcb1b (P06795)

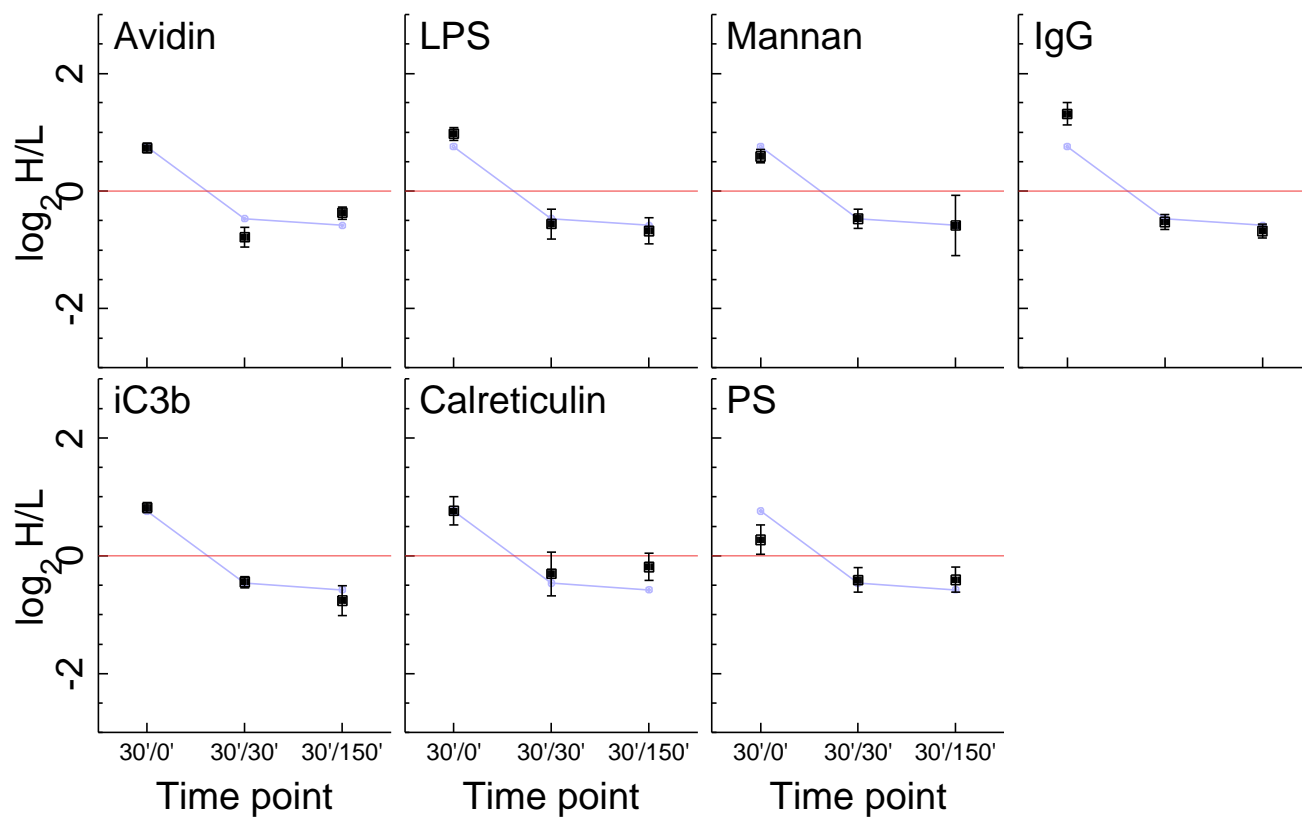

abcb6 (Q9DC29)

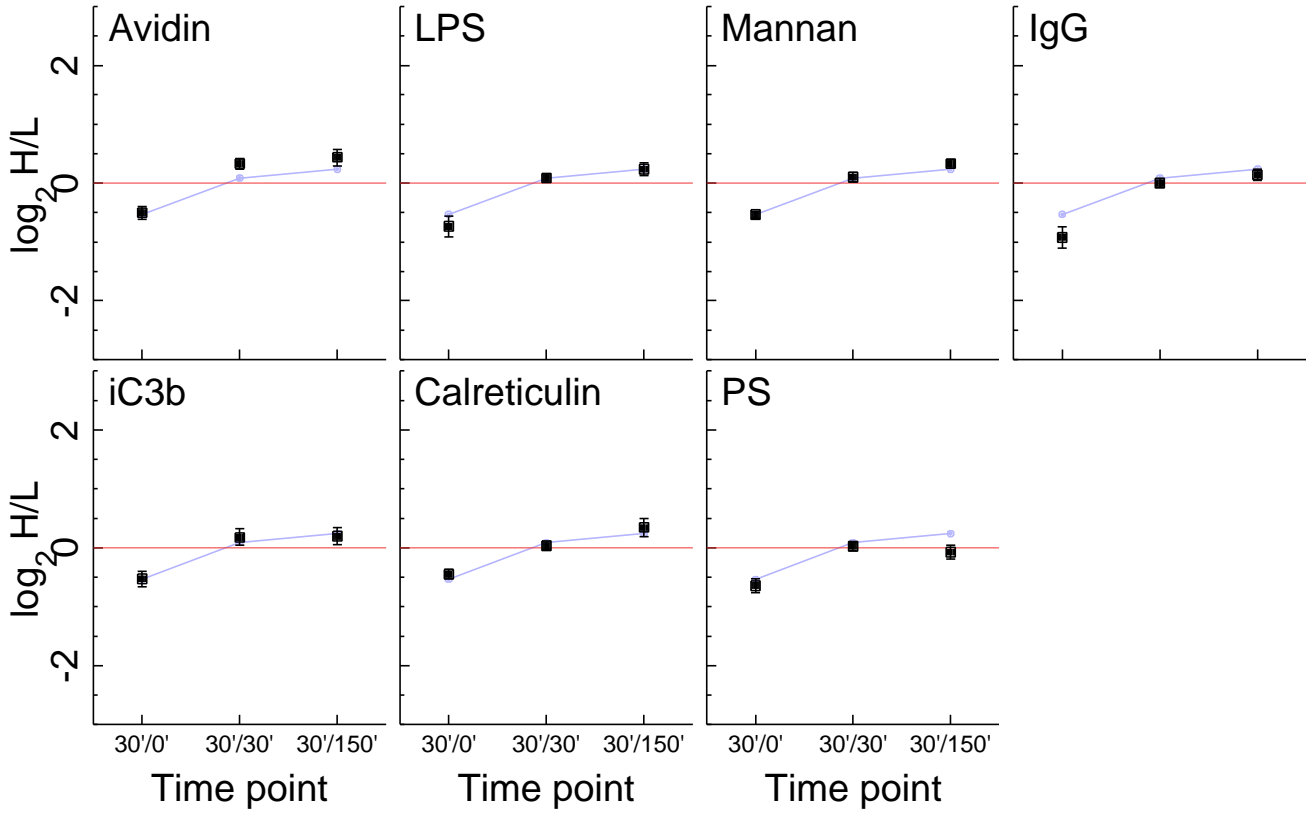

abcc1 (O35379)

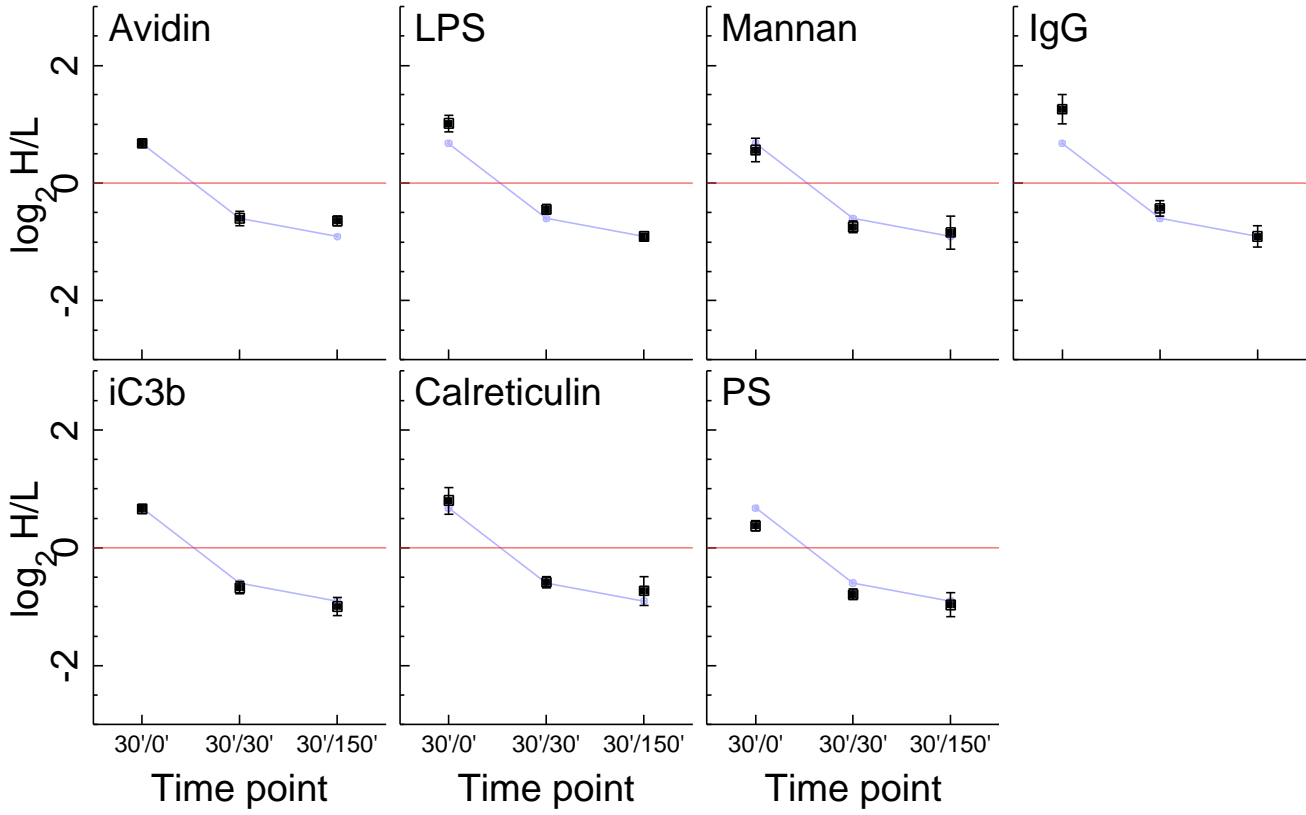

abcc3 (J3QML2)

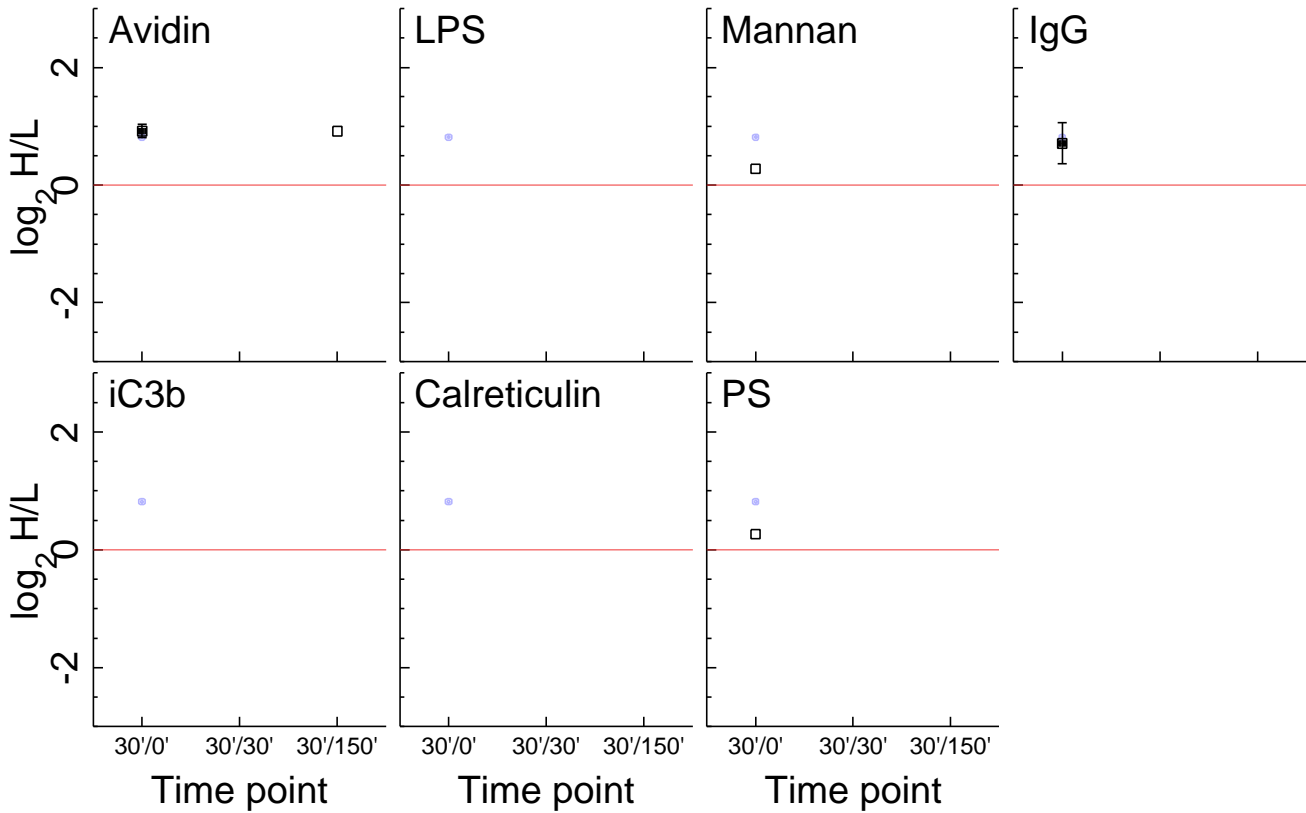

abcd1 (P48410)

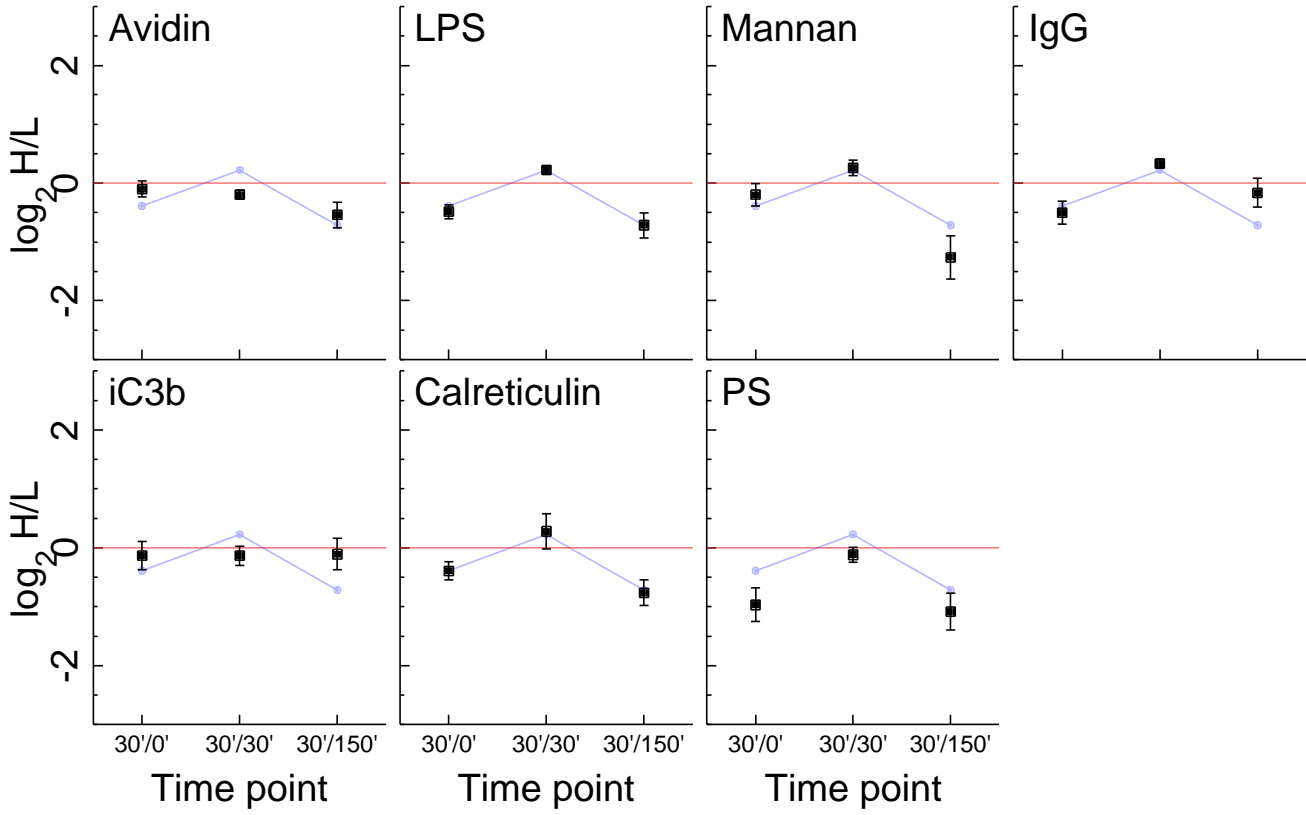

abcd3 (P55096)

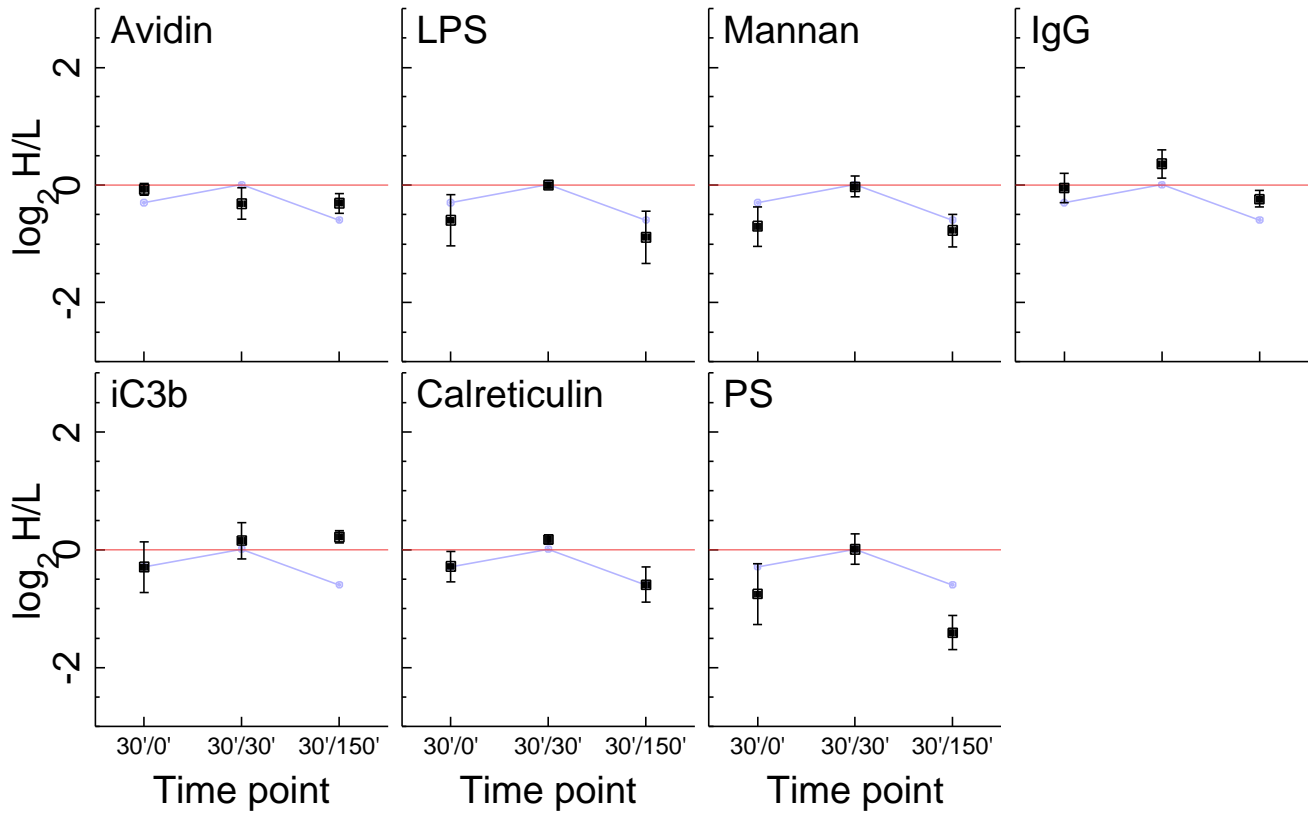

abcd4 (O89016)

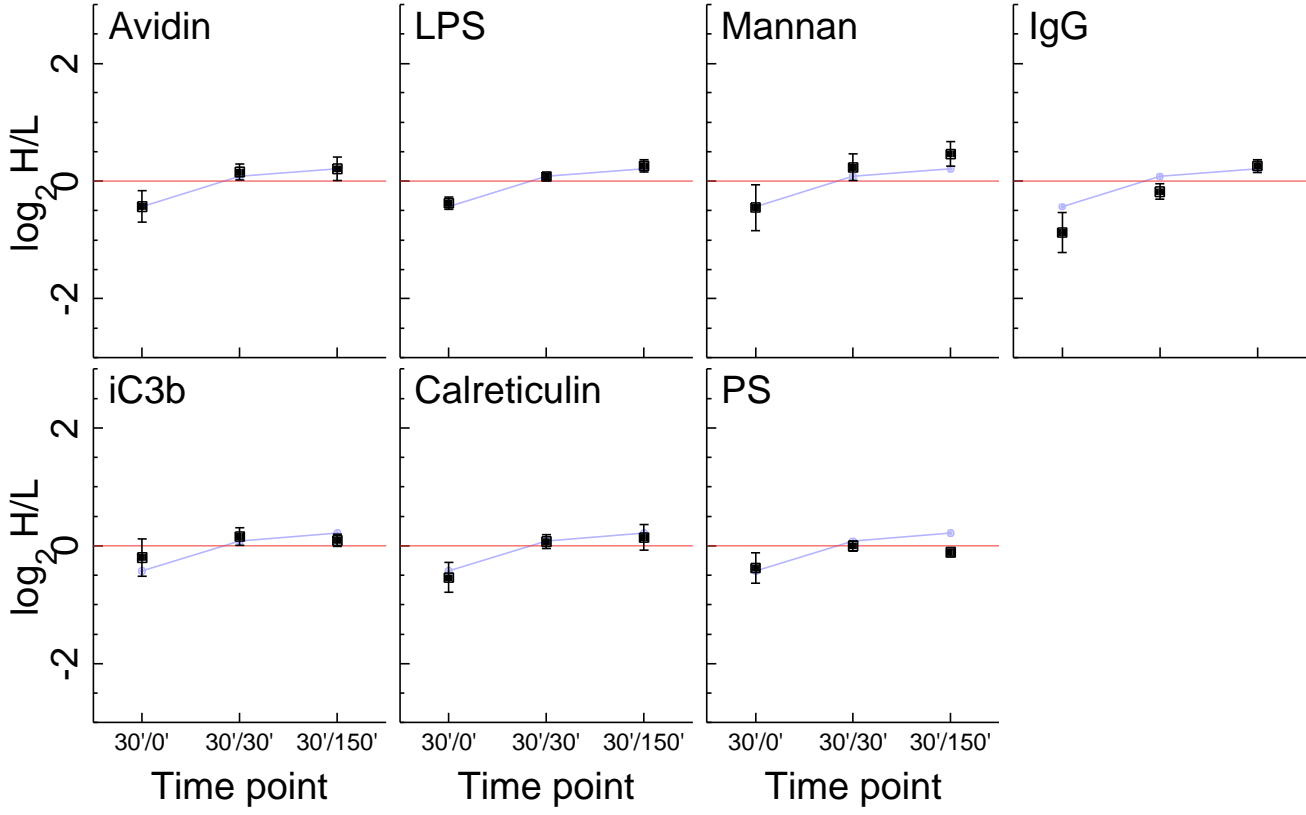

### abcf2 (Q99LE6)

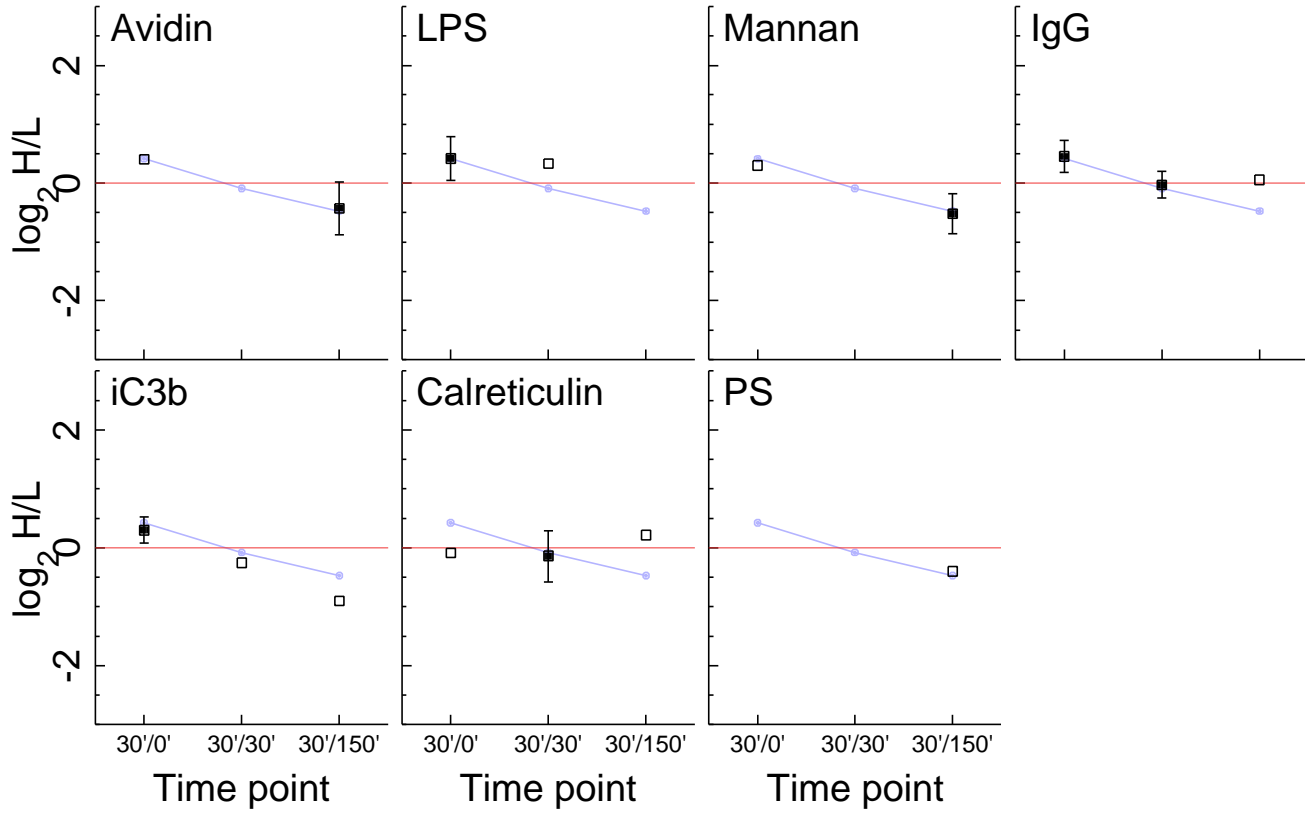



# abhd12 (Q99LR1)

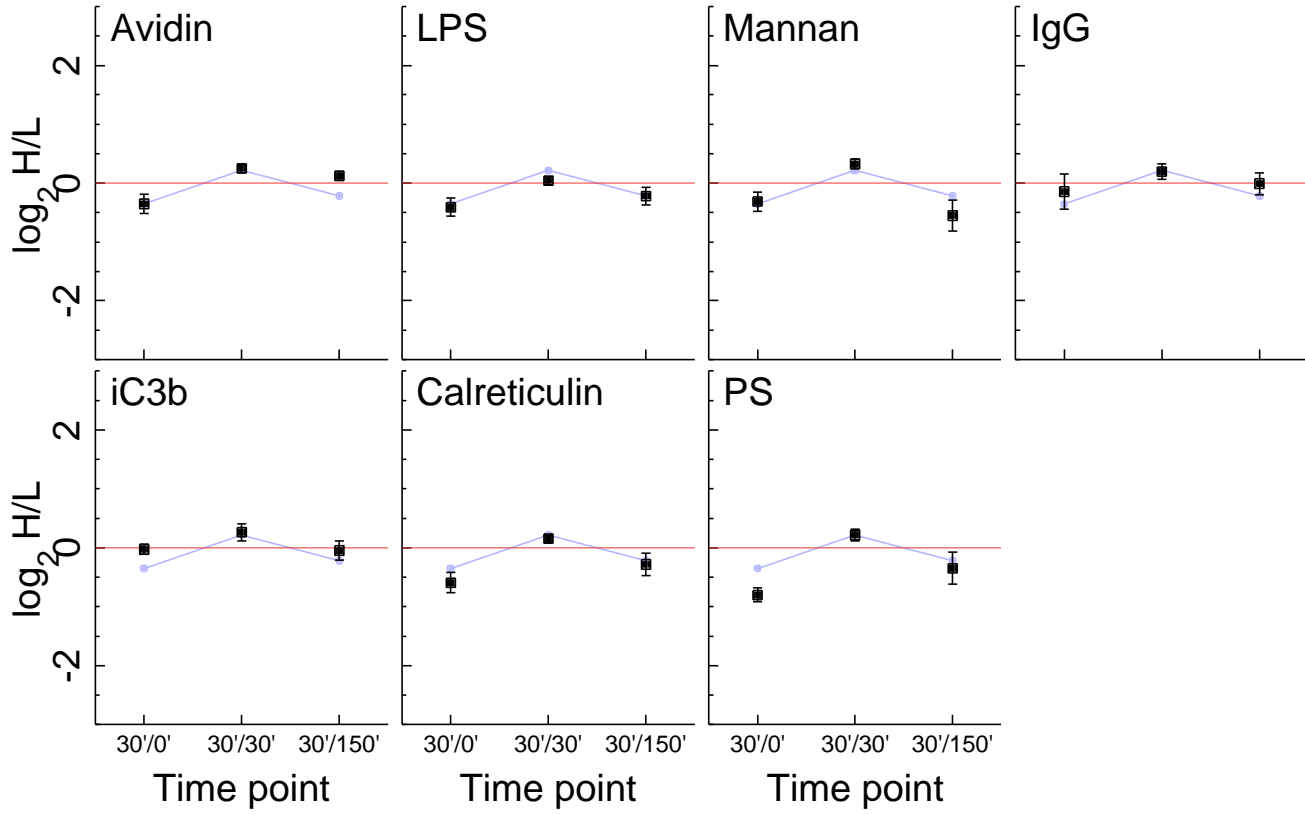

### abi1 (J3QNK8)

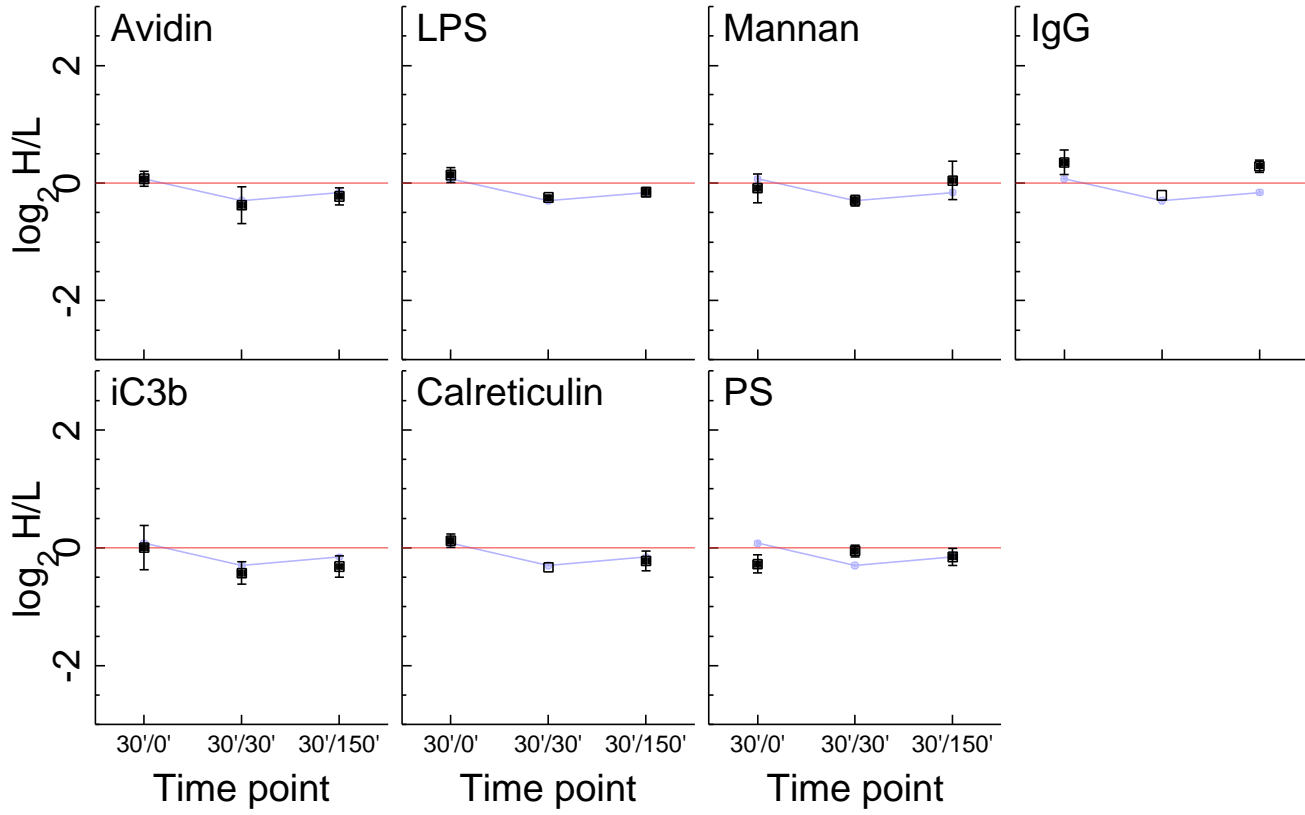

abr (Q5SSL4)

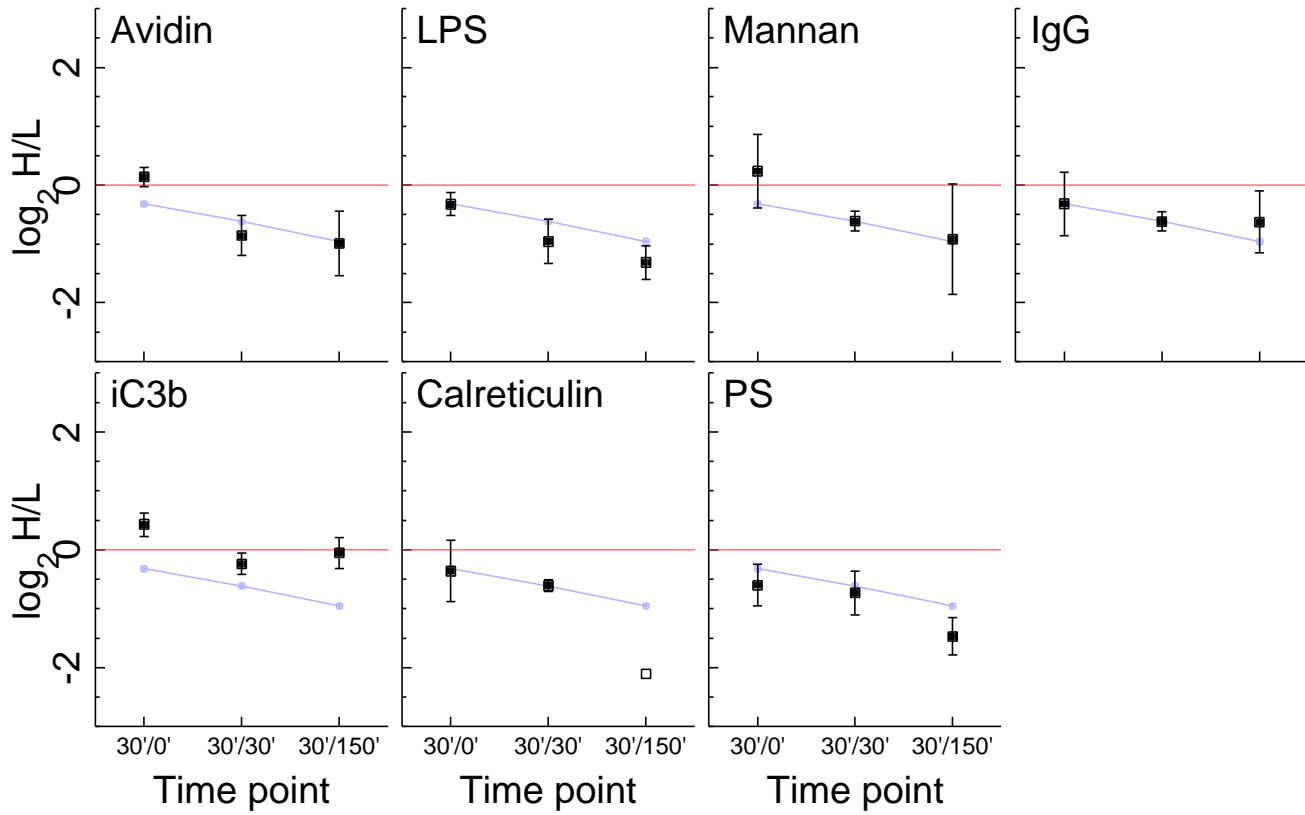

### acca1a (Q921H8)

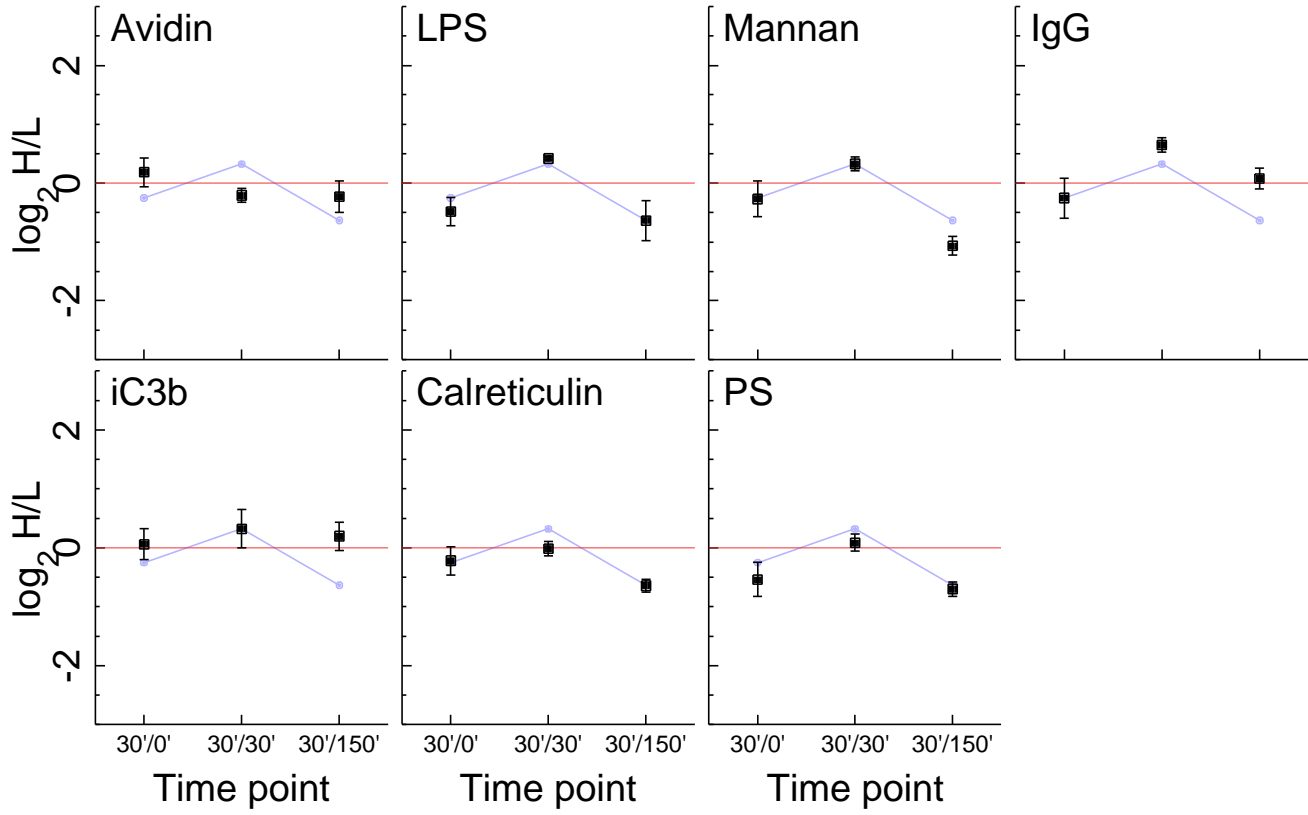

### acaa2 (Q8BWT1)

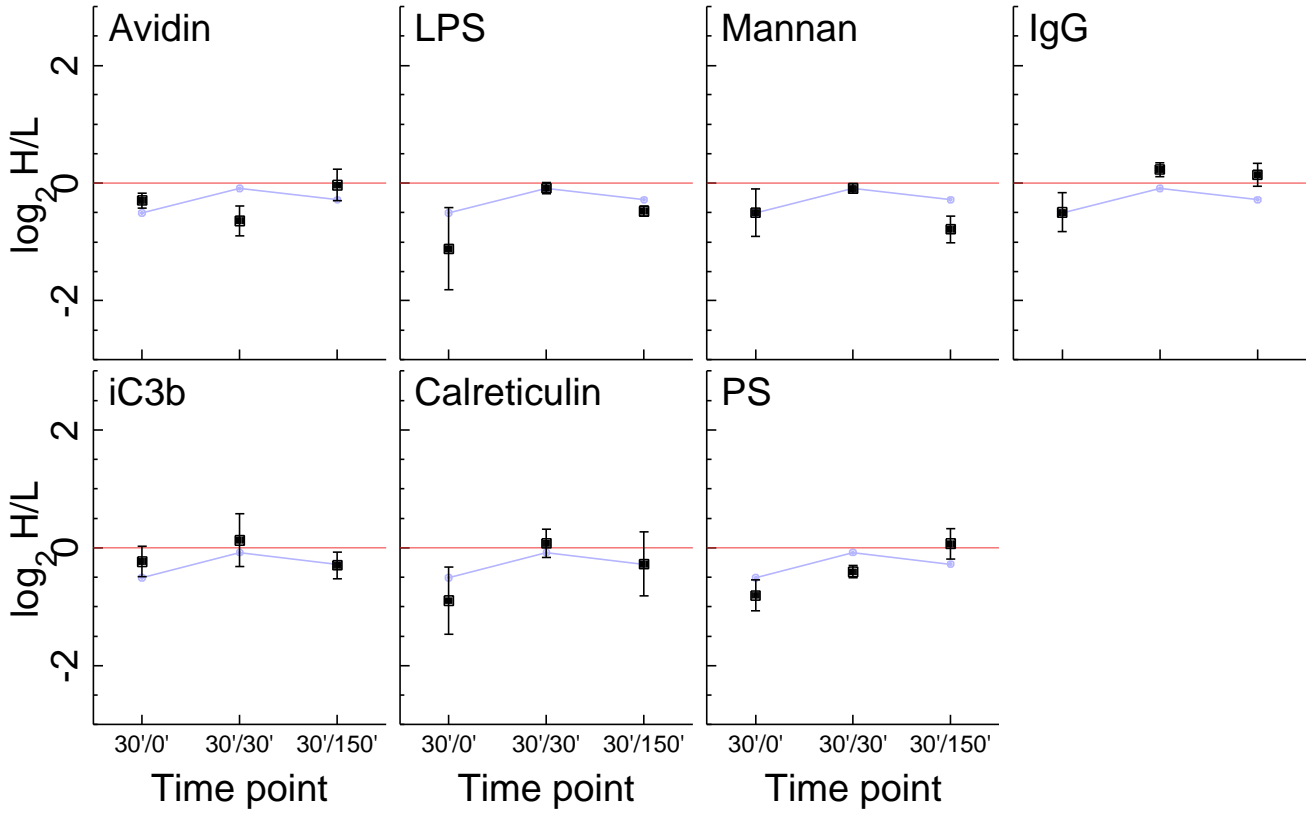

acadl (P51174)

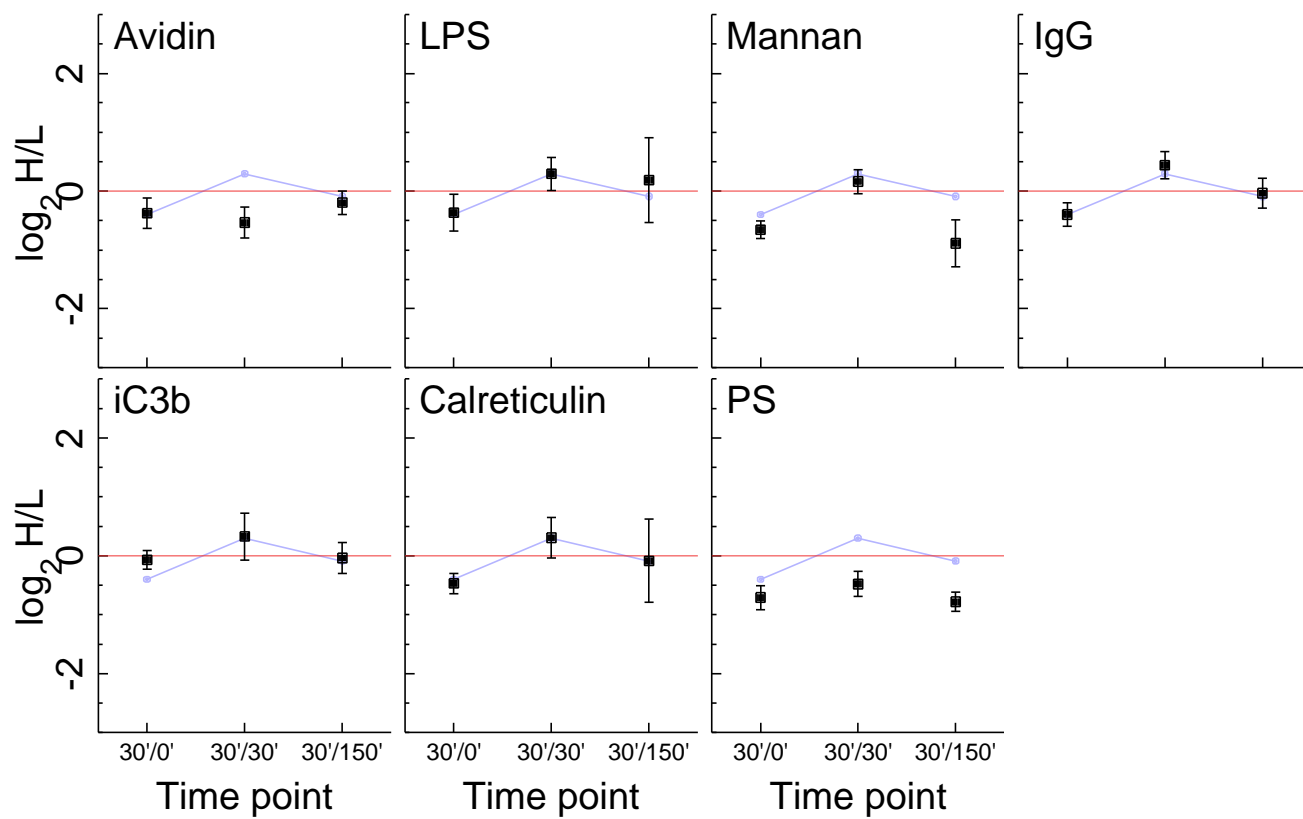

acadm (P45952)

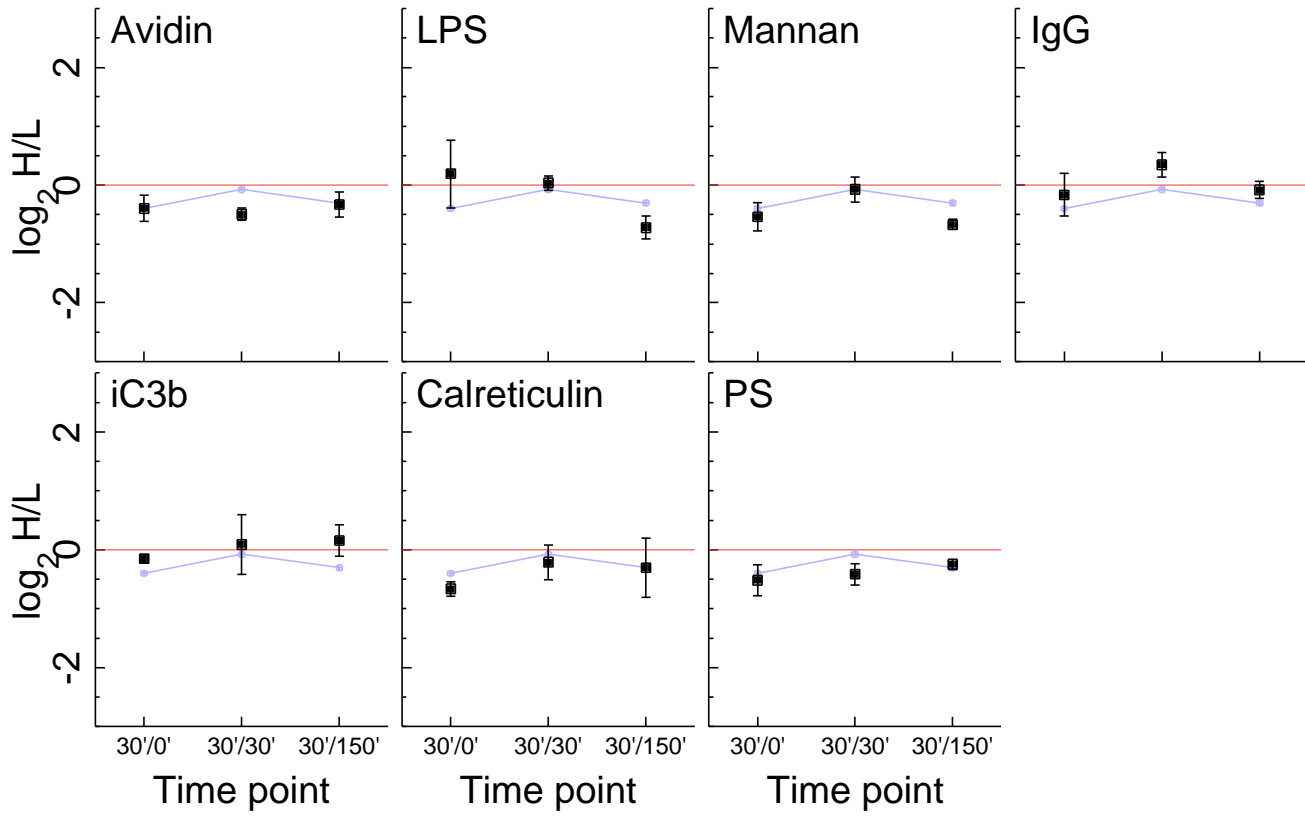

acads (Q07417)

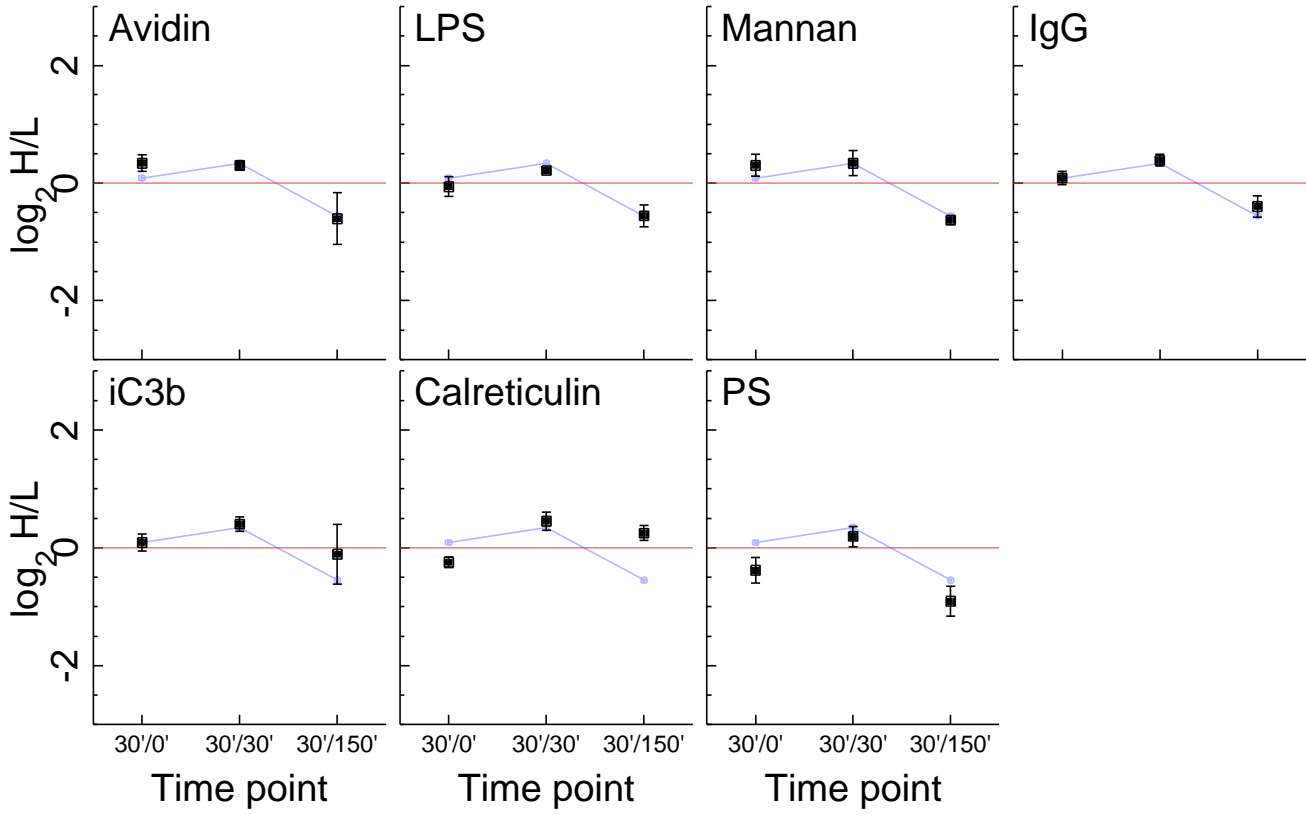



acadvl (P50544)

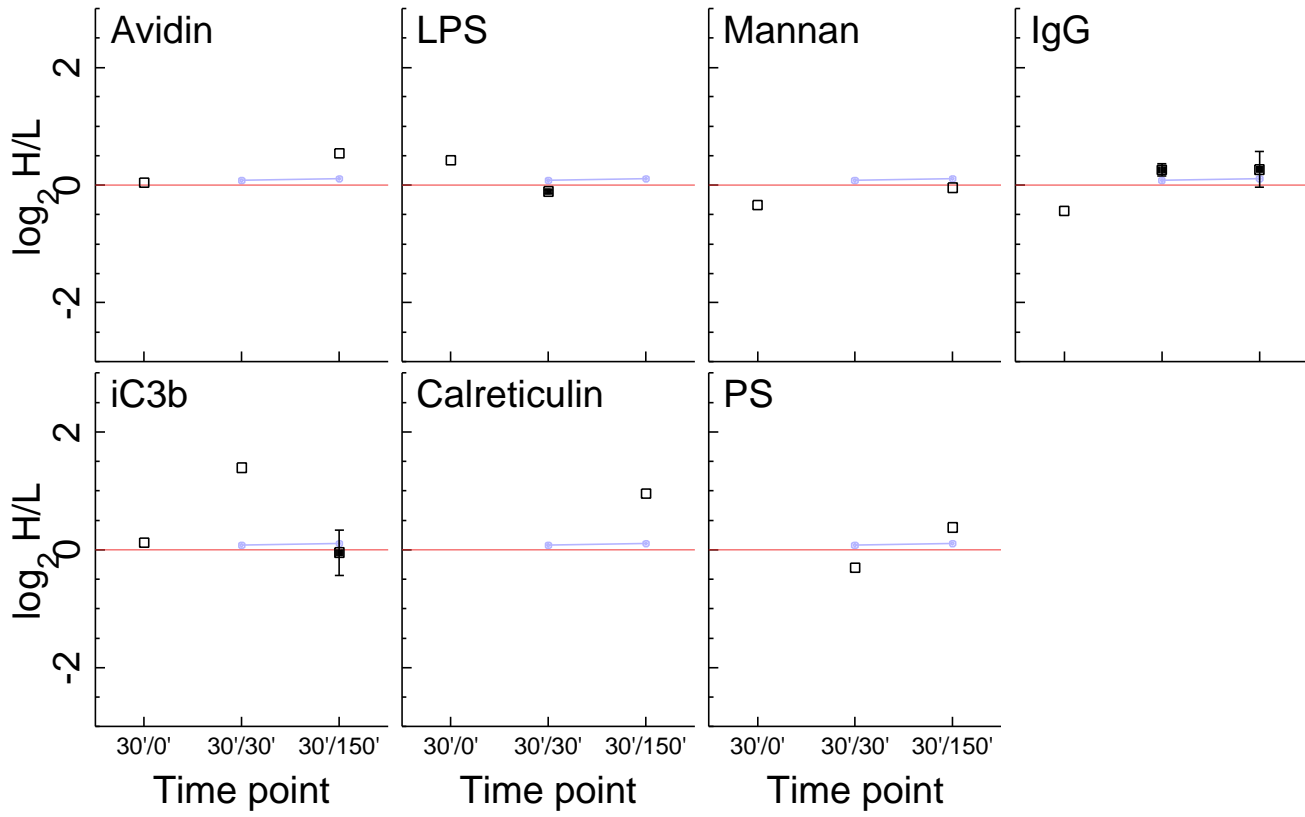

### acap2 (Q6ZQK5)

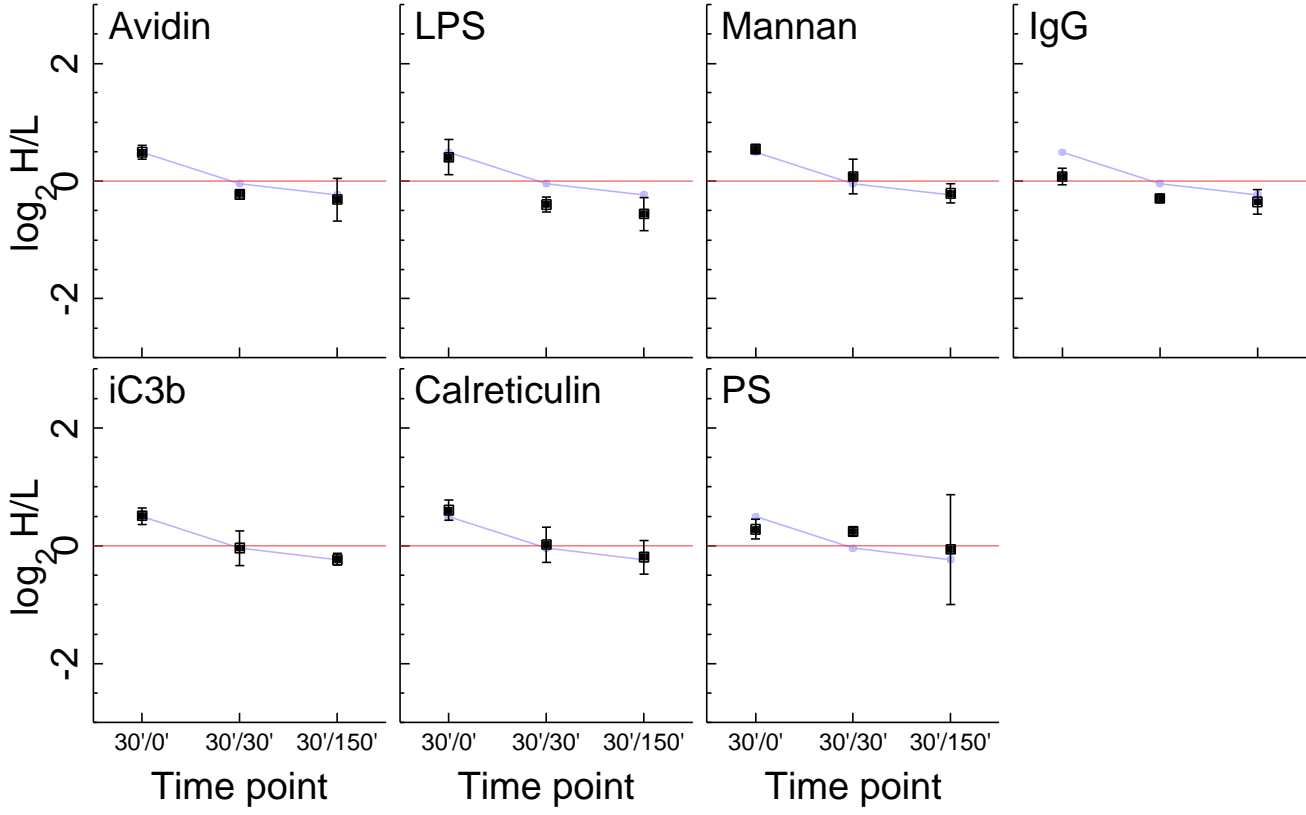

# acat1 (Q8QZT1)

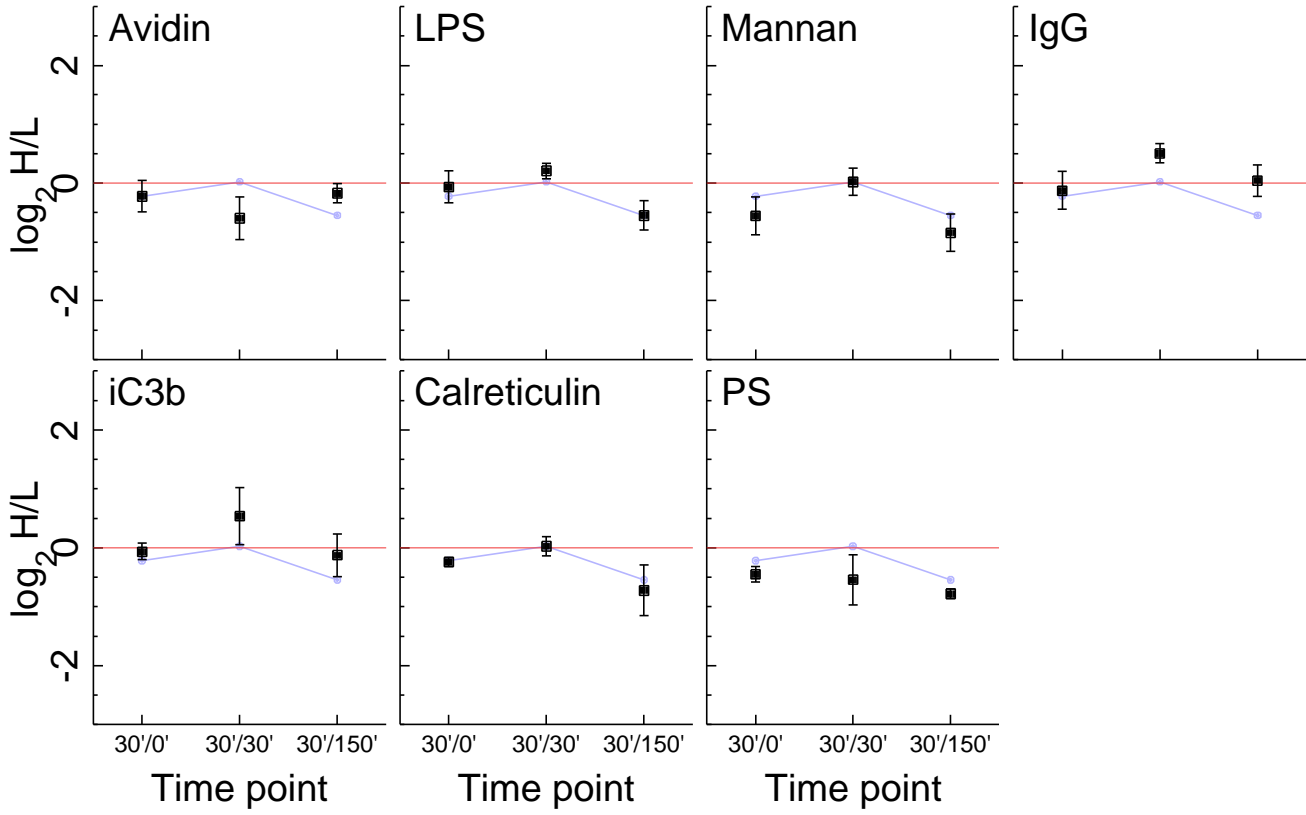

acbd3 (Q8BMP6)

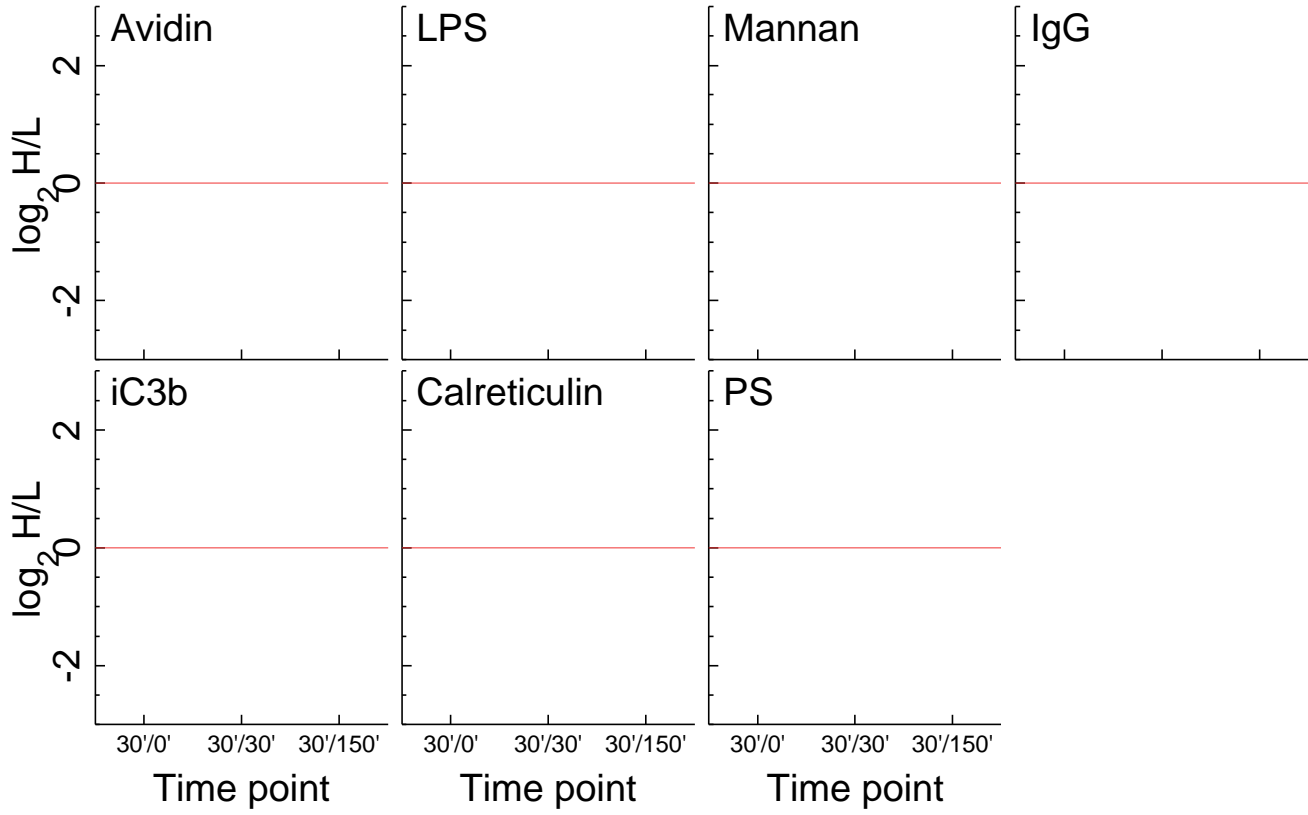

aco2 (Q99K10)

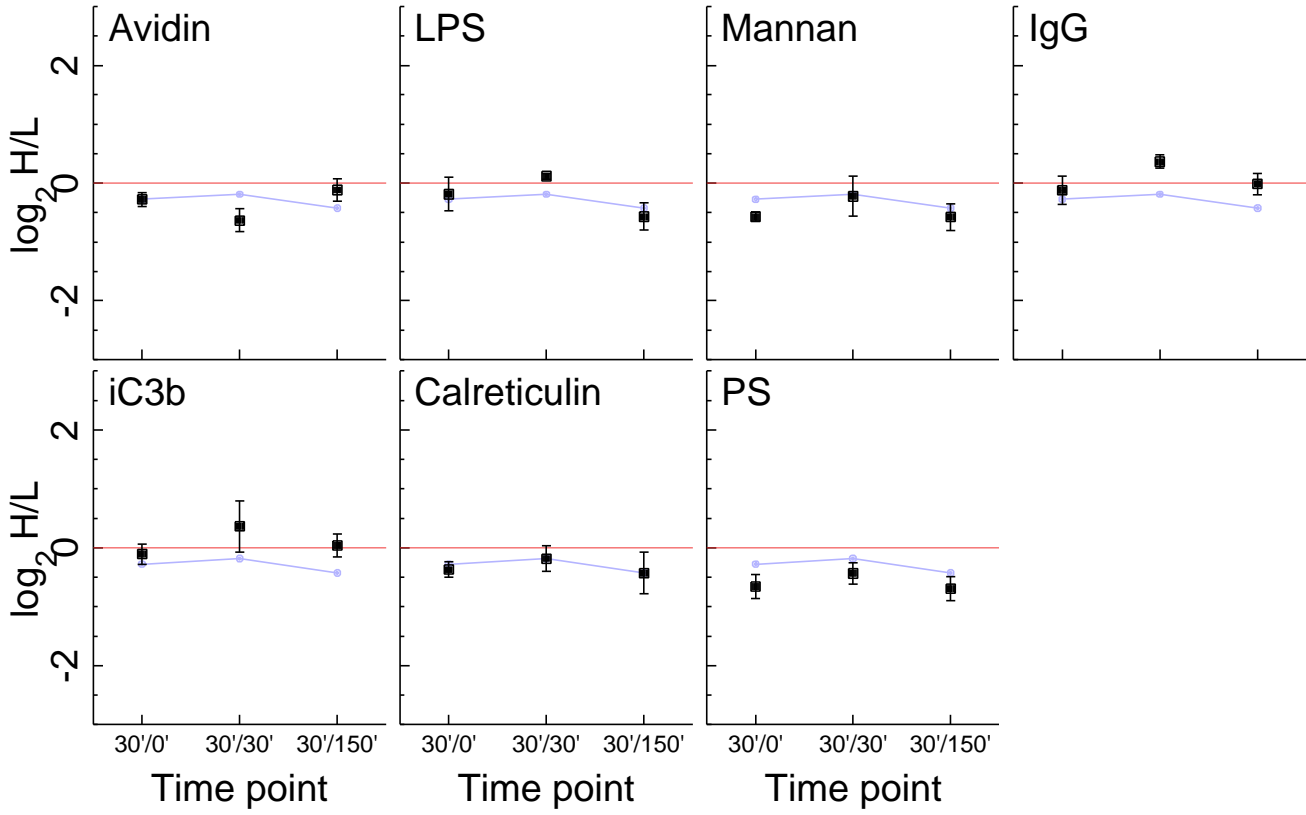

acot13 (Q9CQR4)

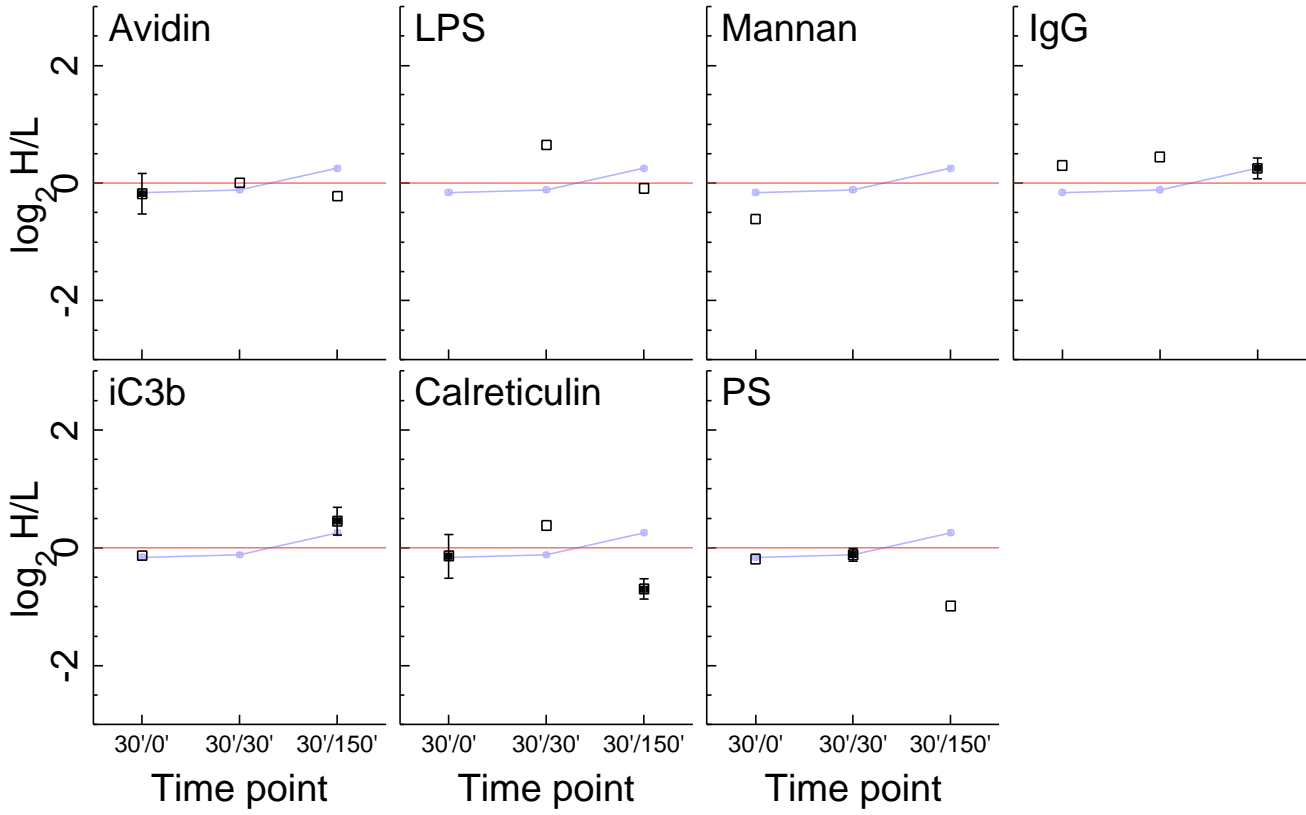

### acox3 (Q9EPL9)

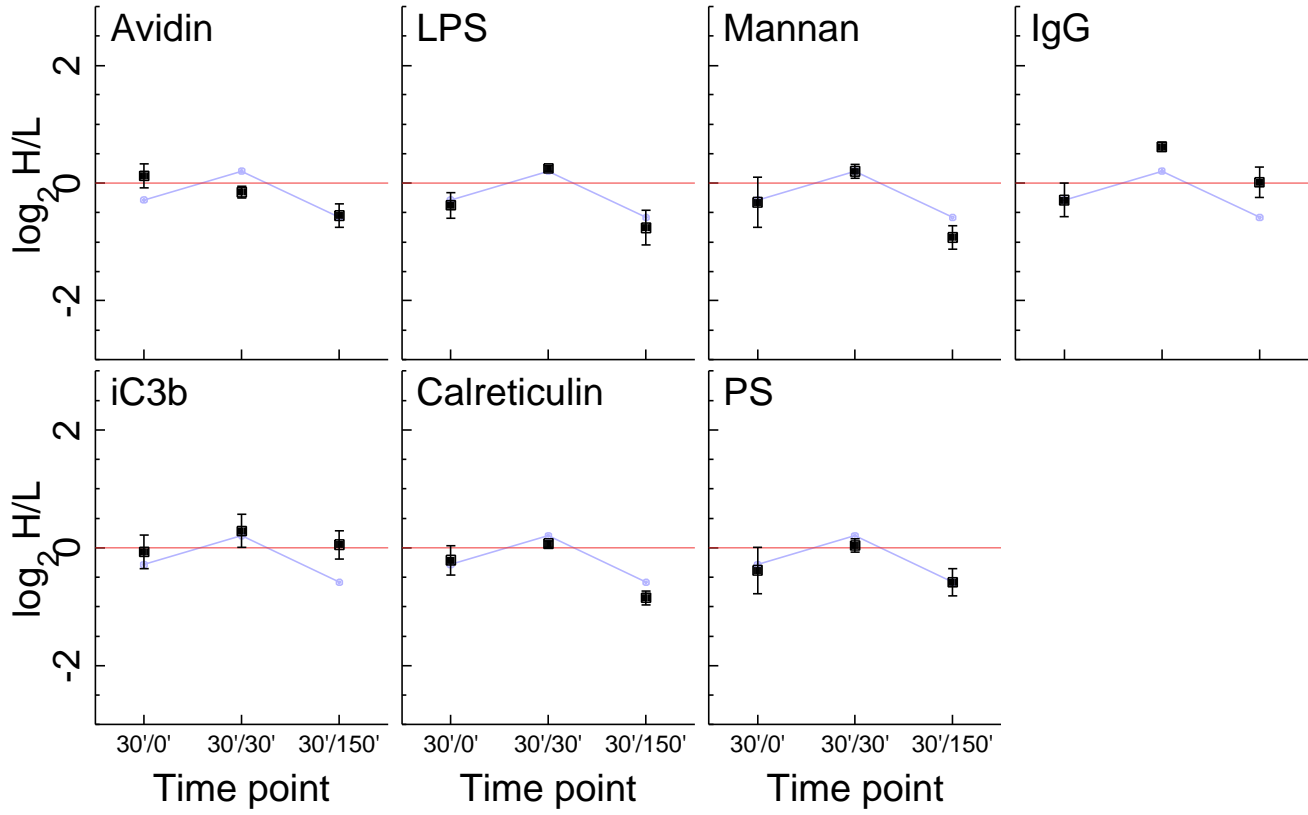

acp2 (P24638)

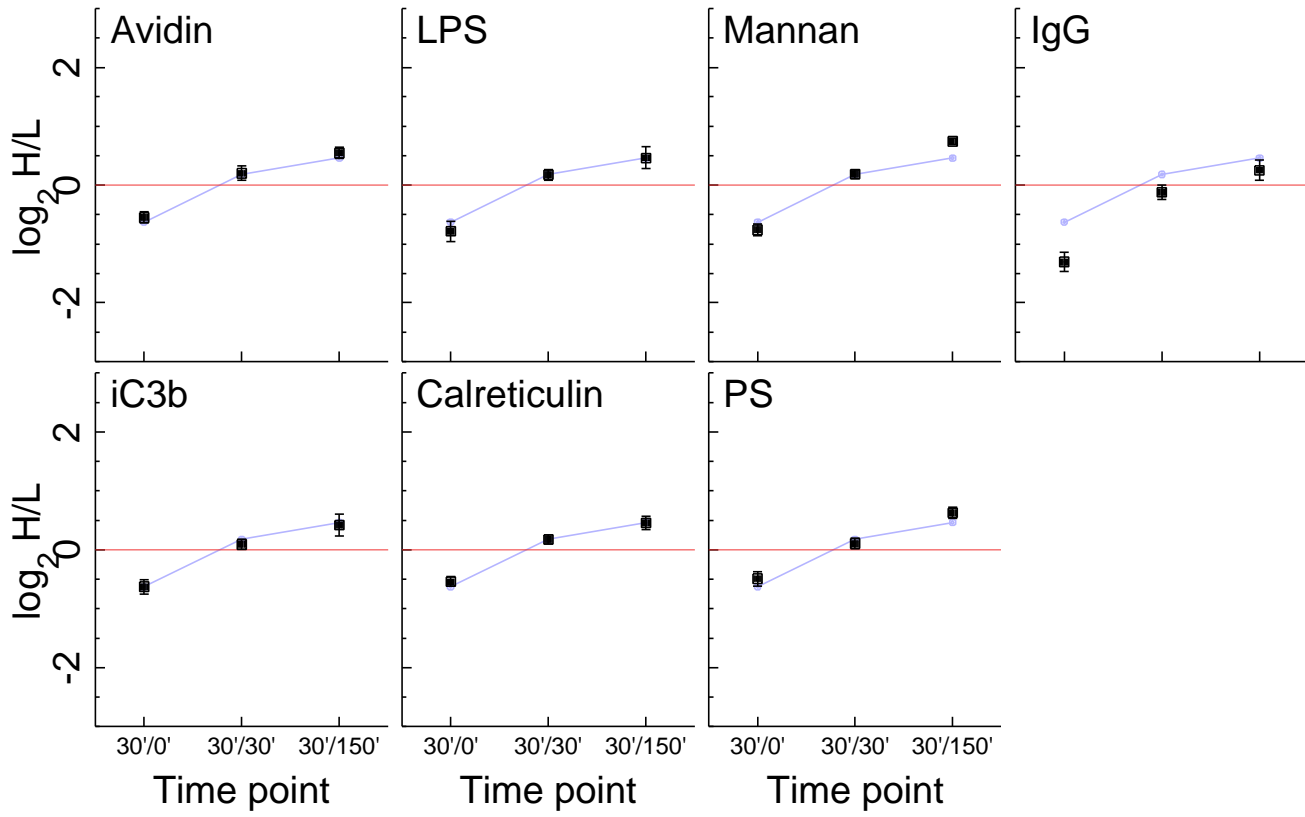



acp5 (Q05117)

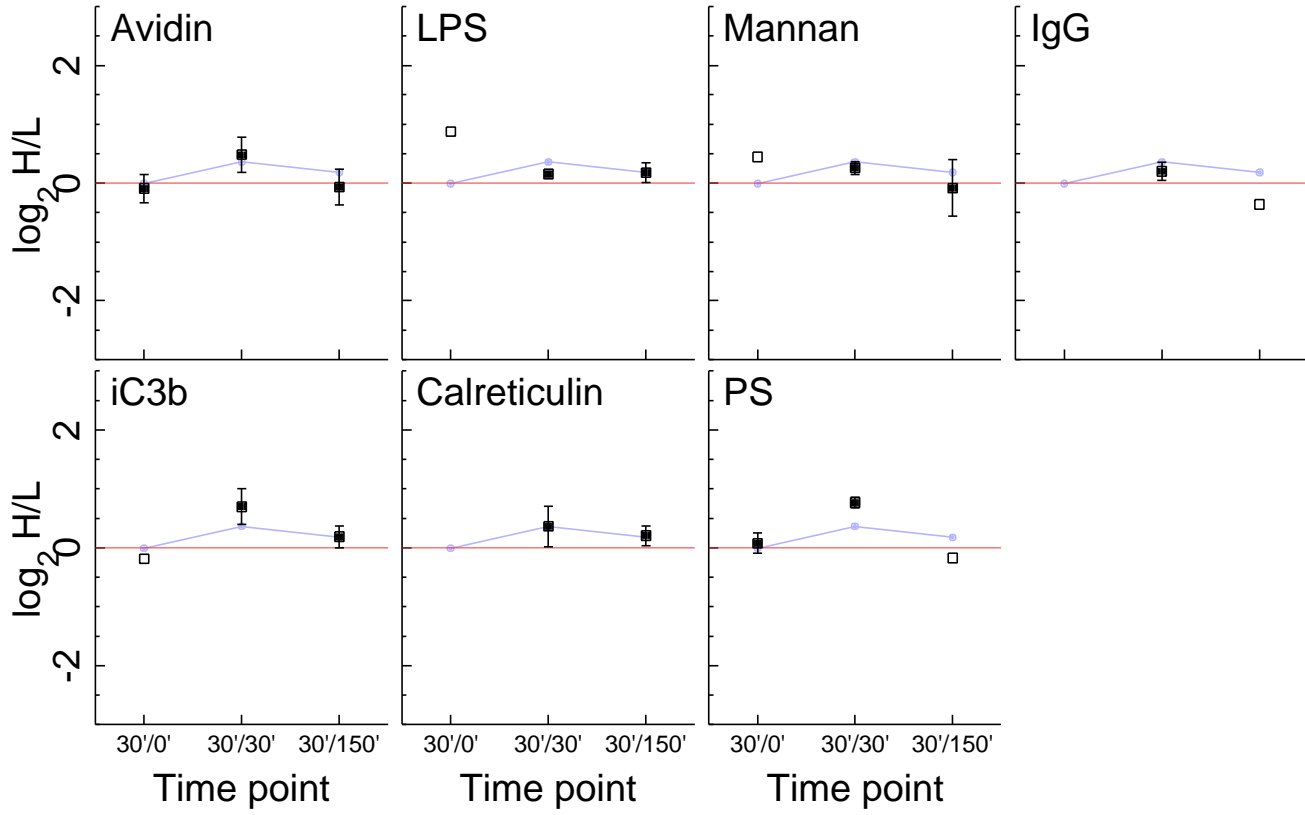

acsl1 (D3Z041)

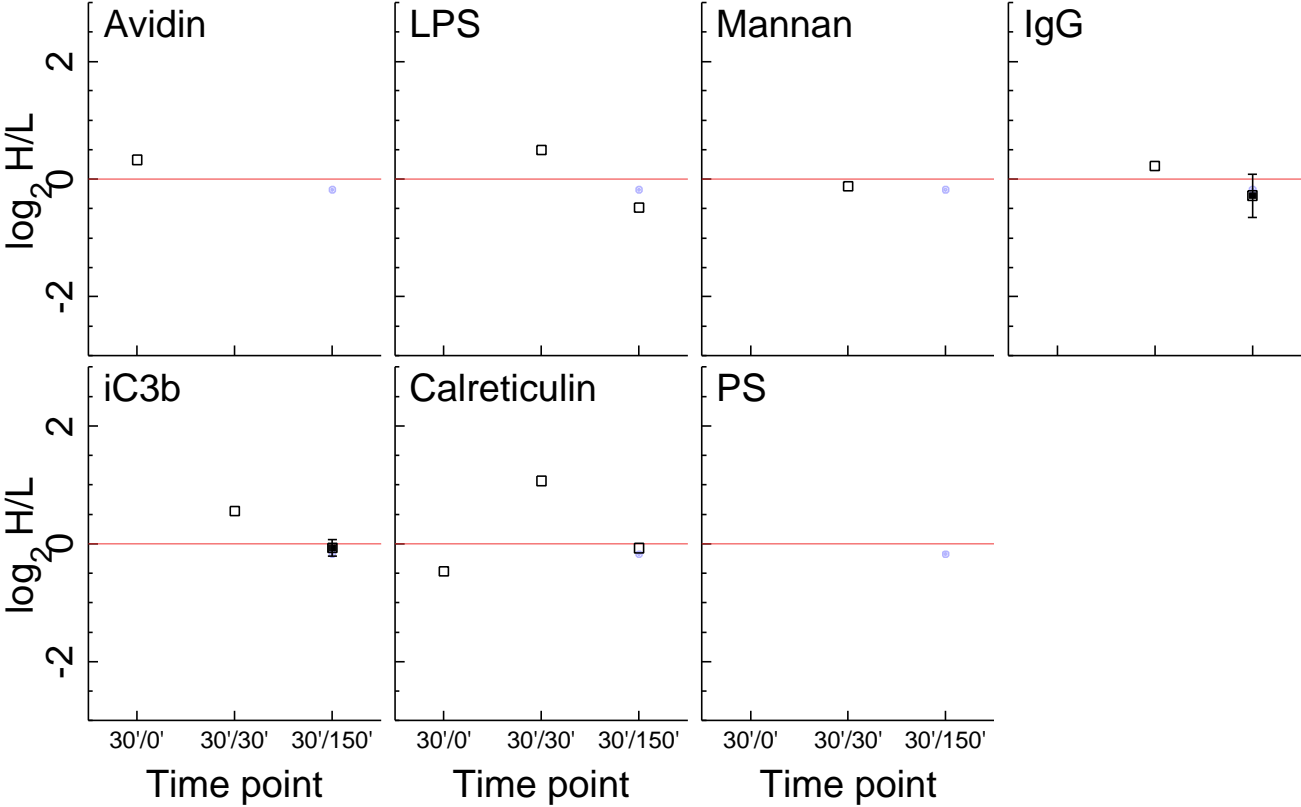

acsl4 (Q9QUJ7)

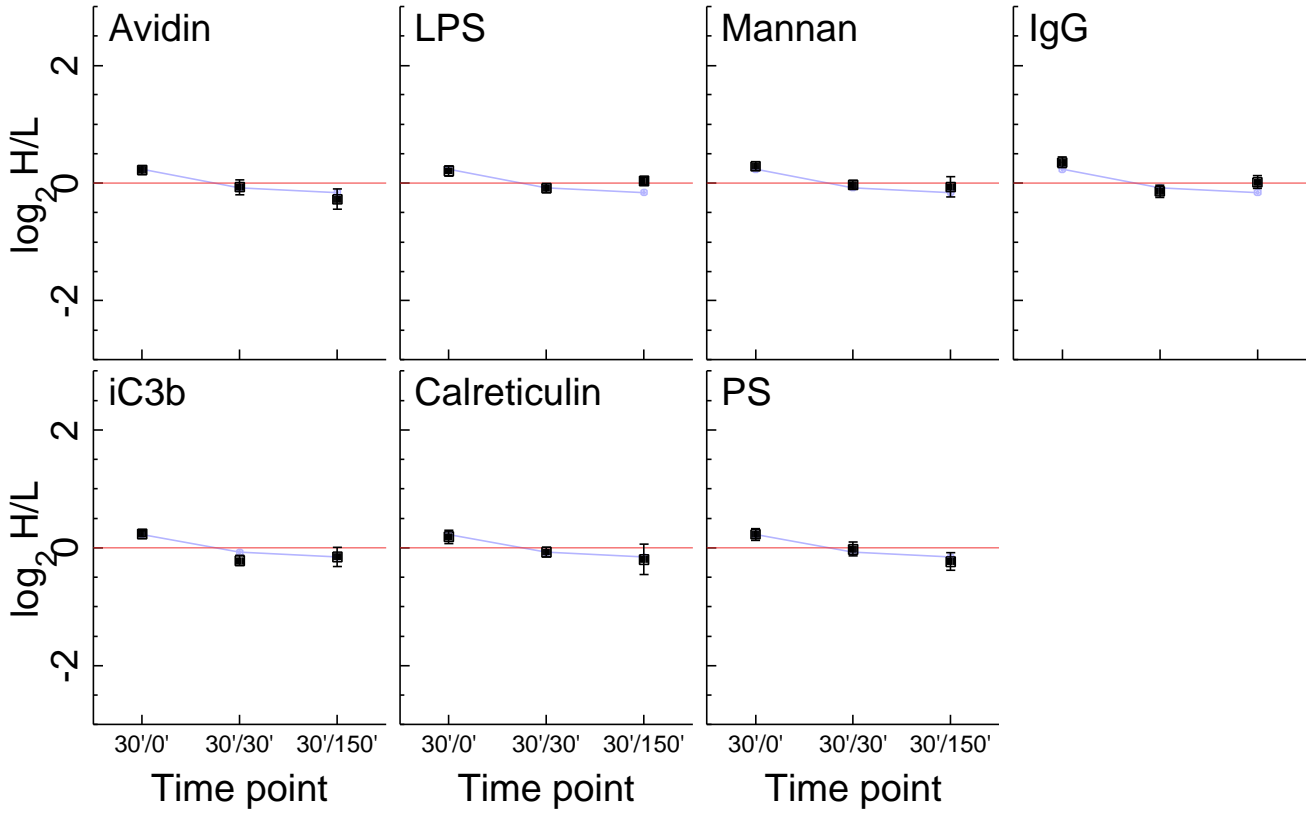

acs15 (Q8JZR0)

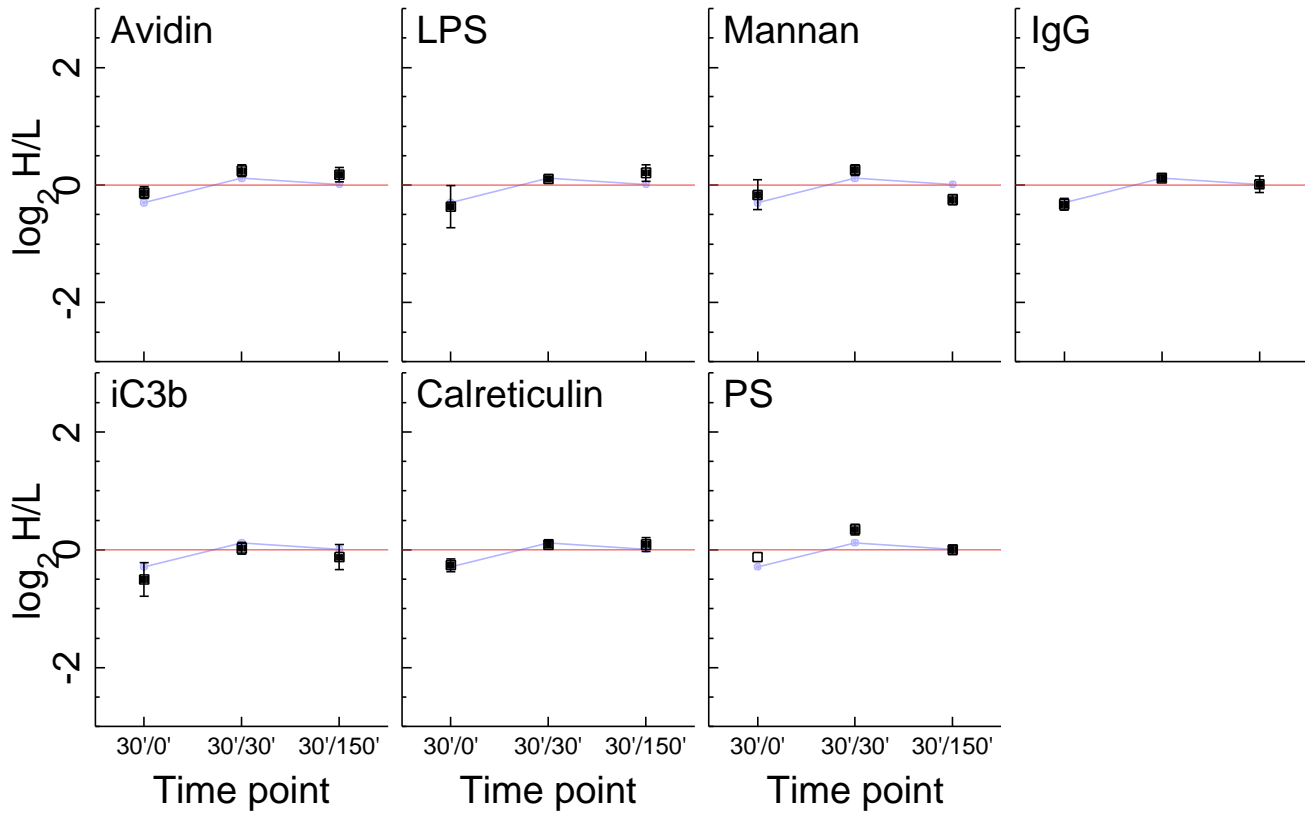

actc1 (P68033)

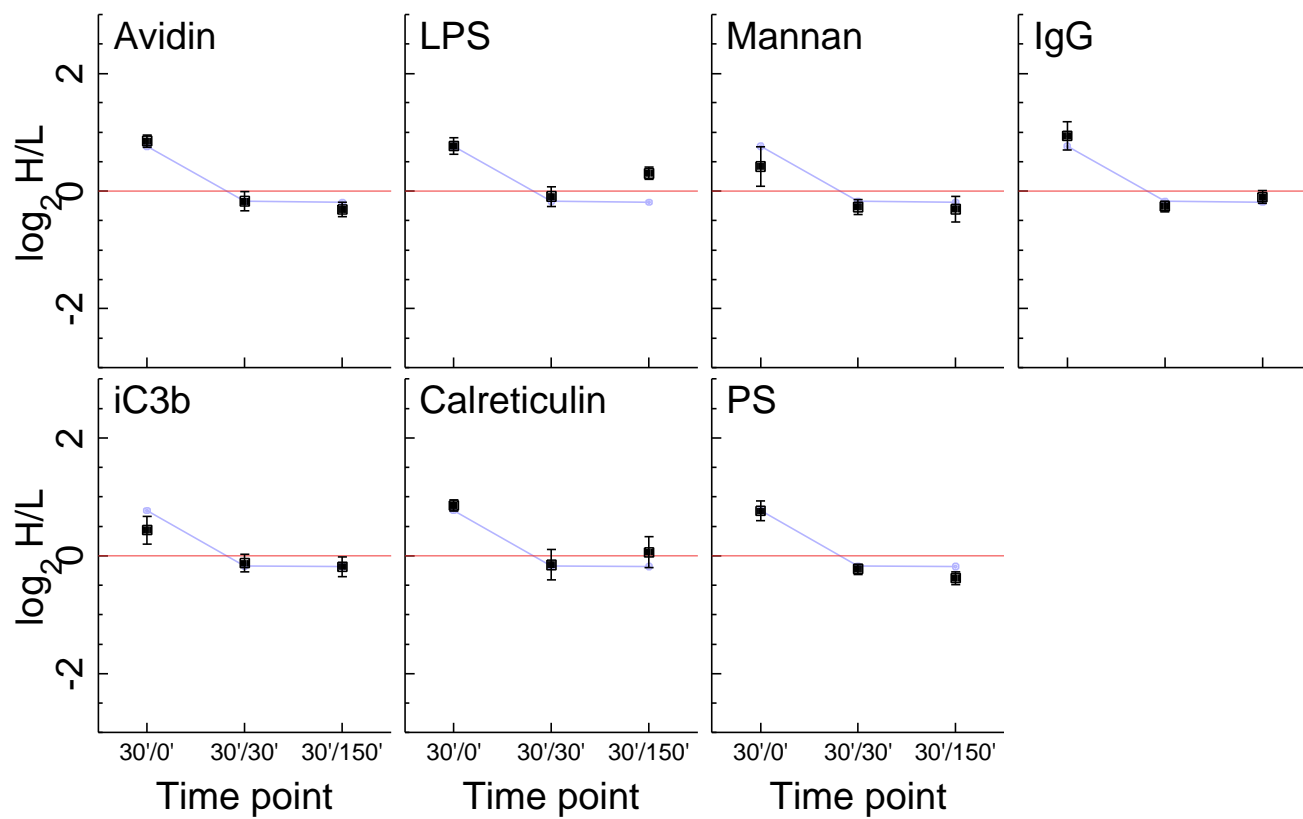

### actn1 (Q7TPR4)

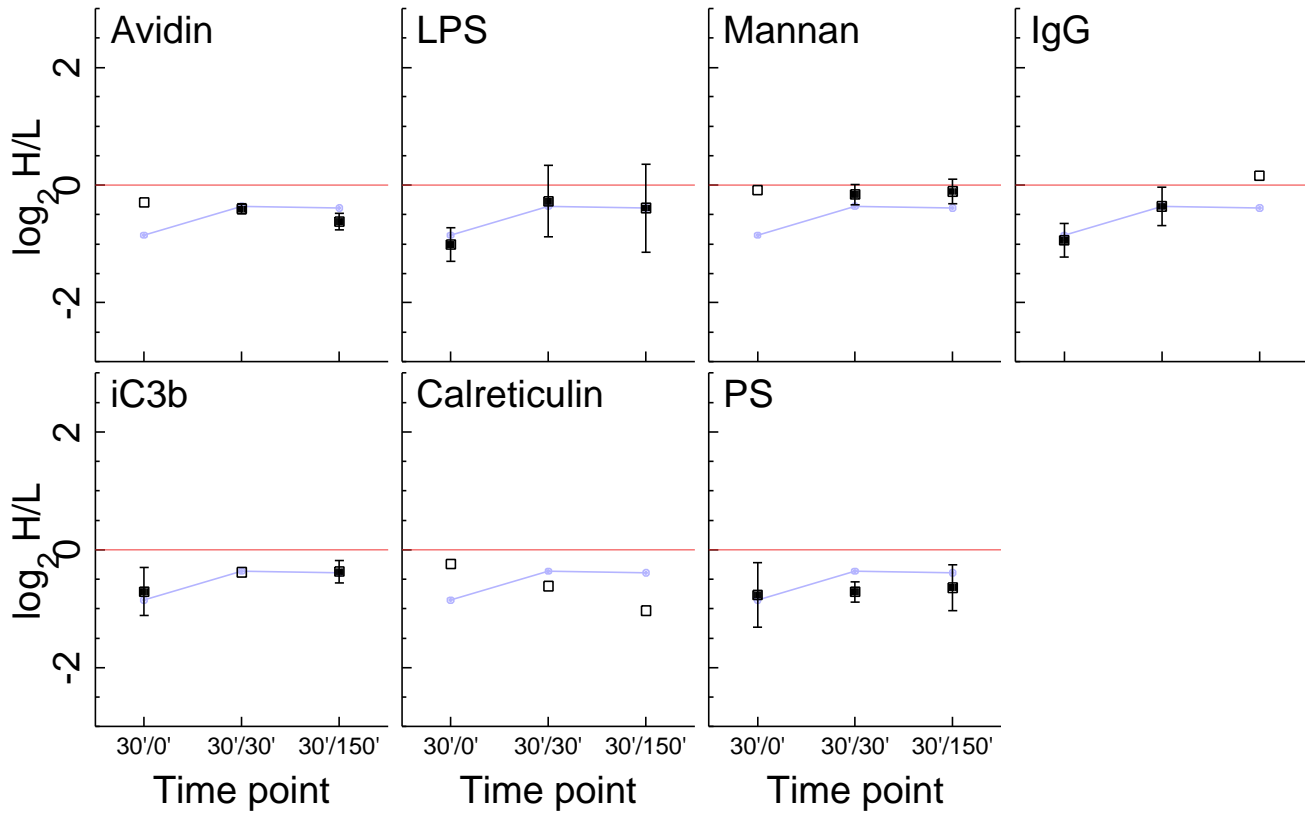

actn4 (P57780)

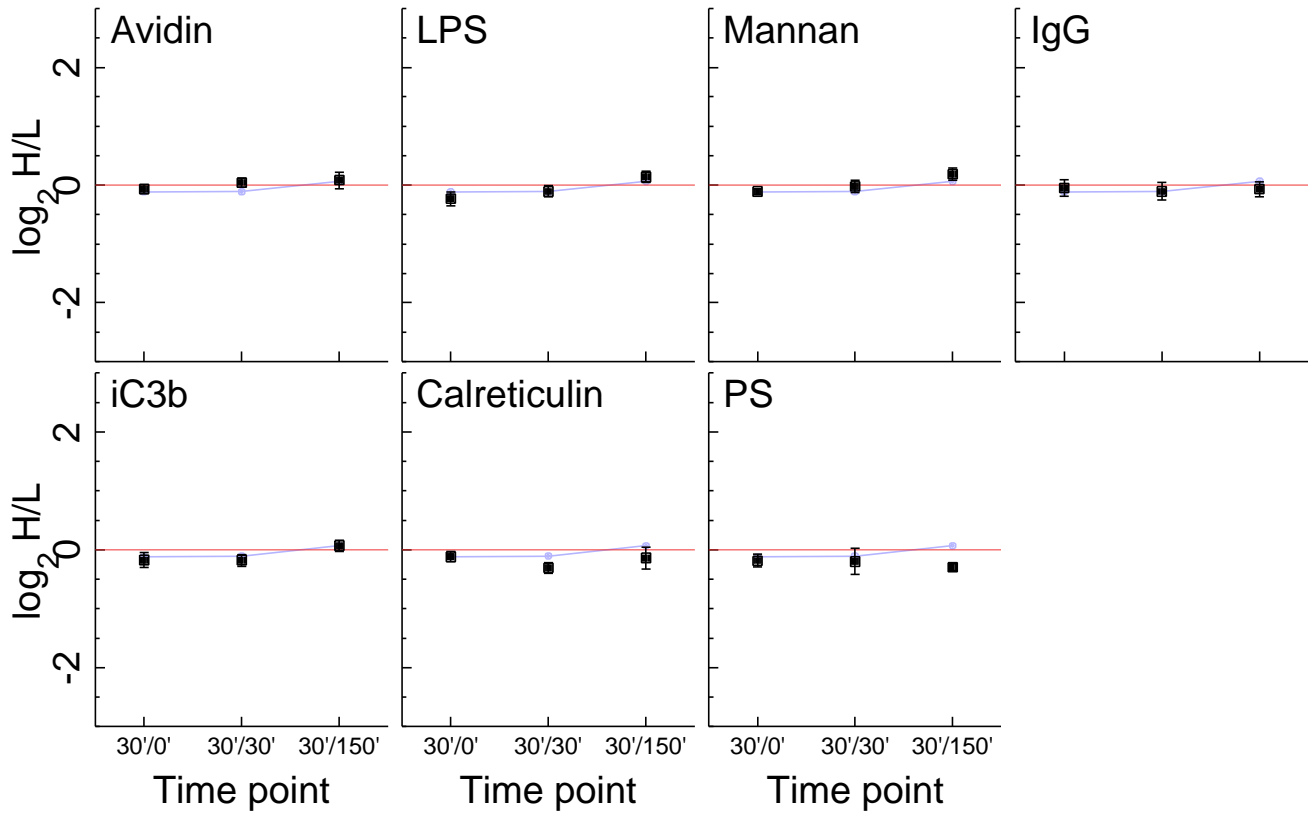

actr1a (P61164)

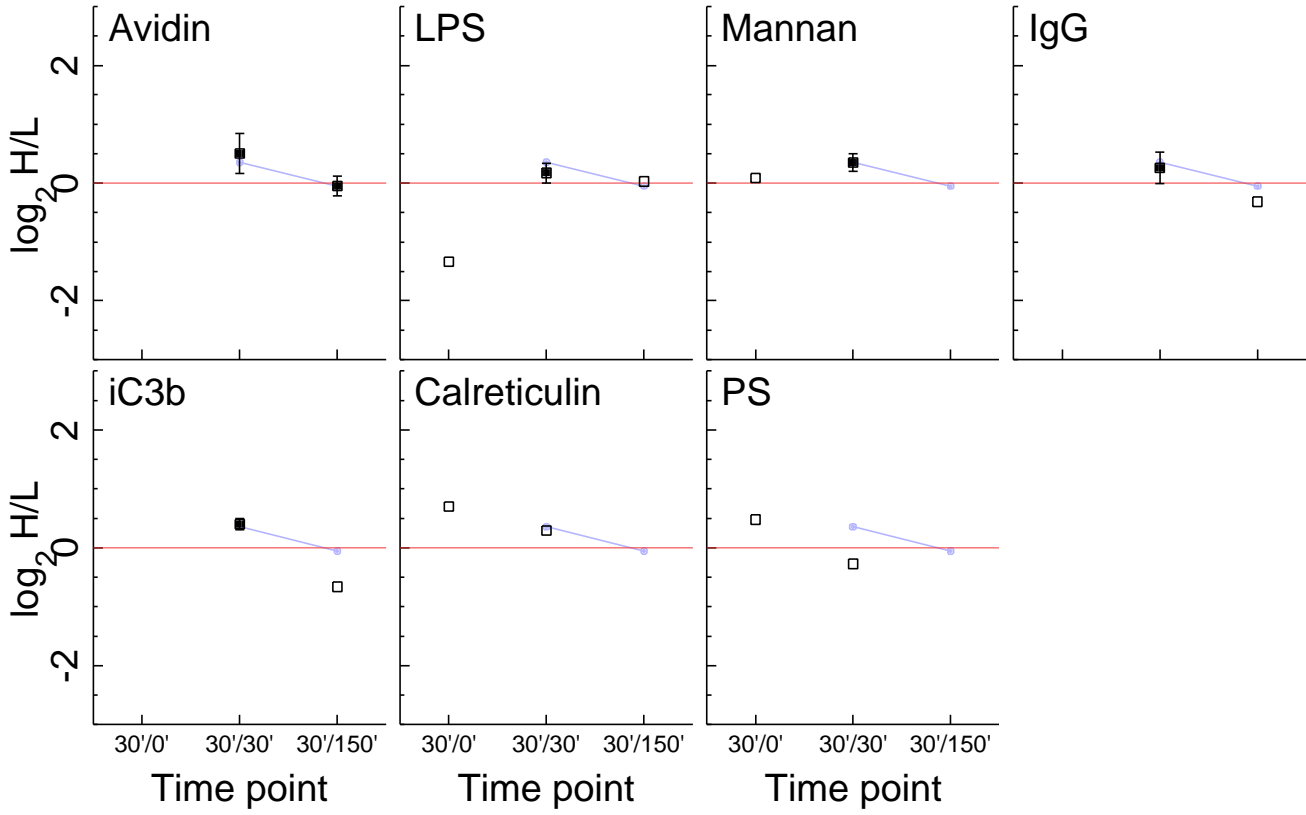



### actr2 (P61161)

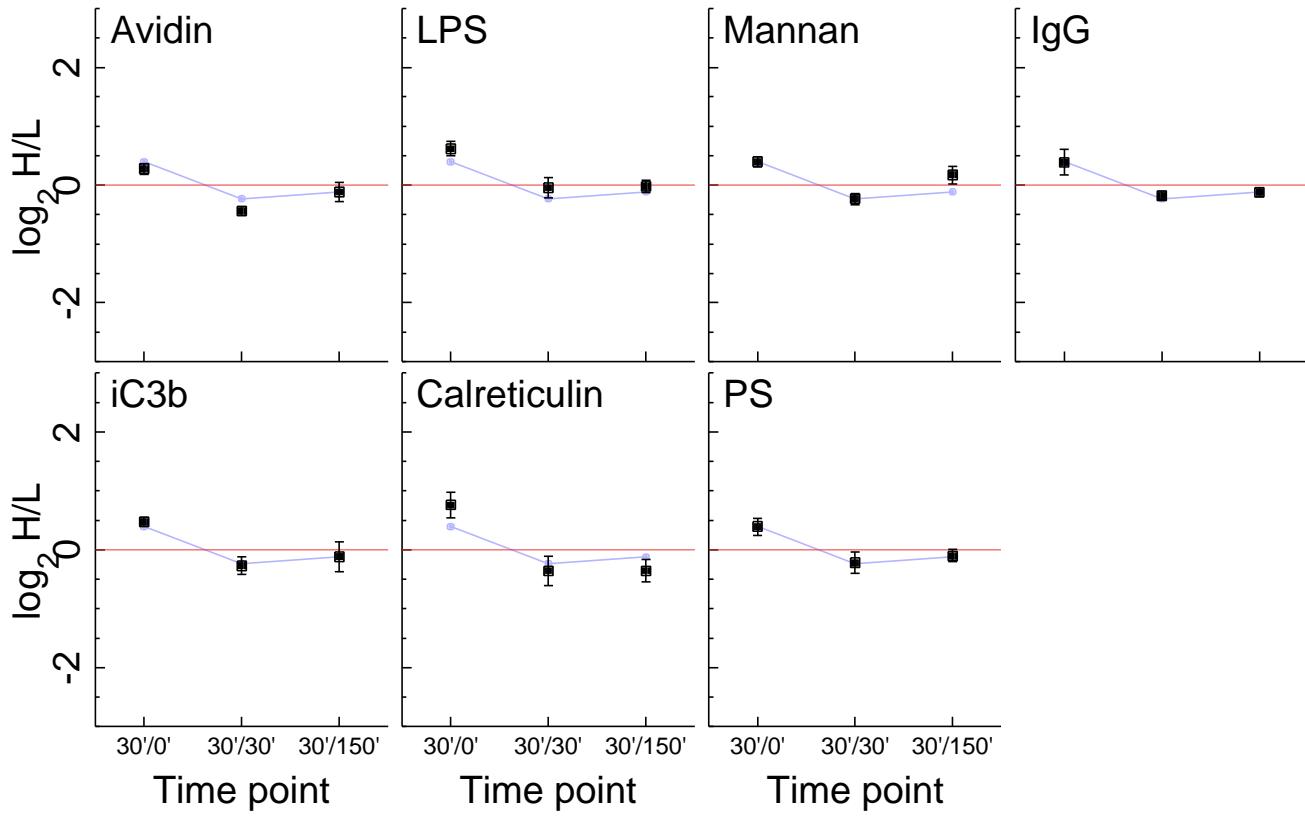

### actr3 (Q99JY9)

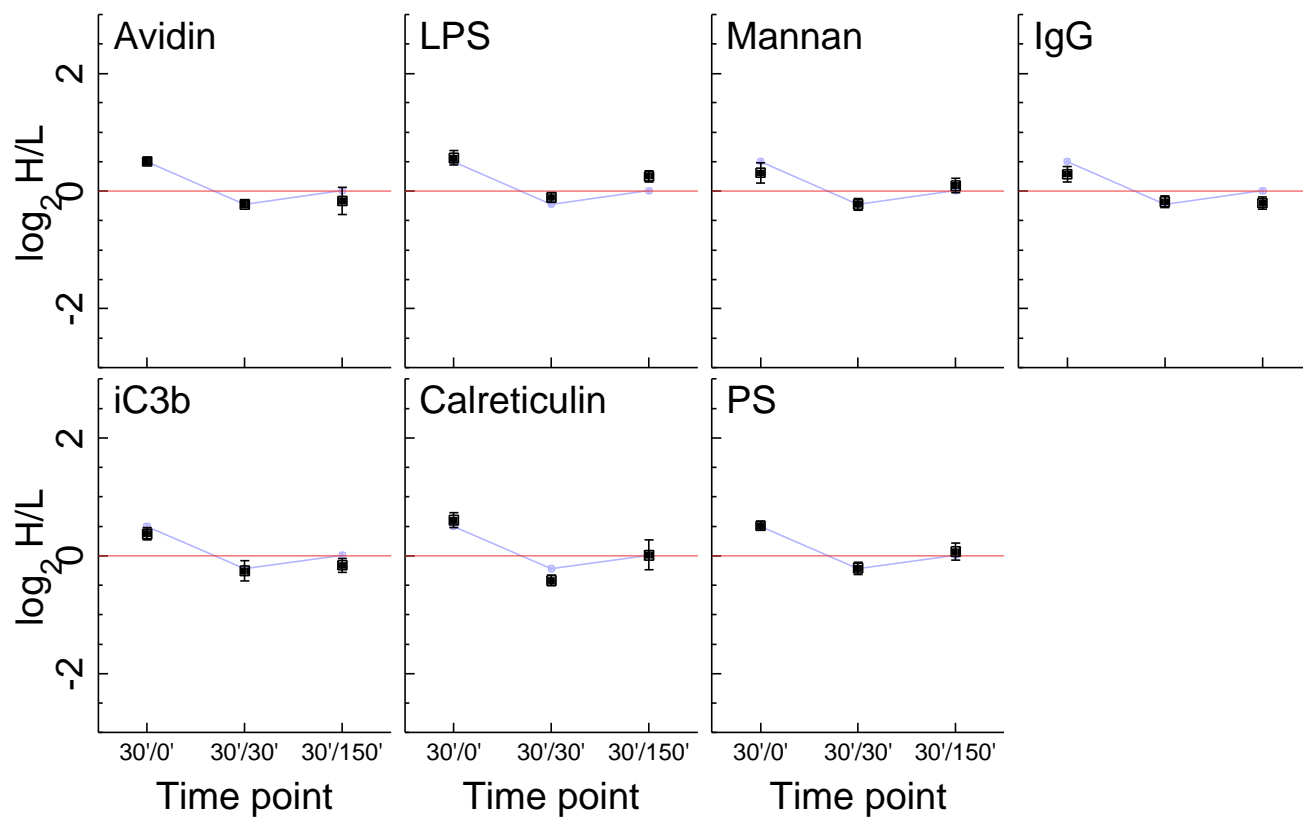

# adam10 (O35598)

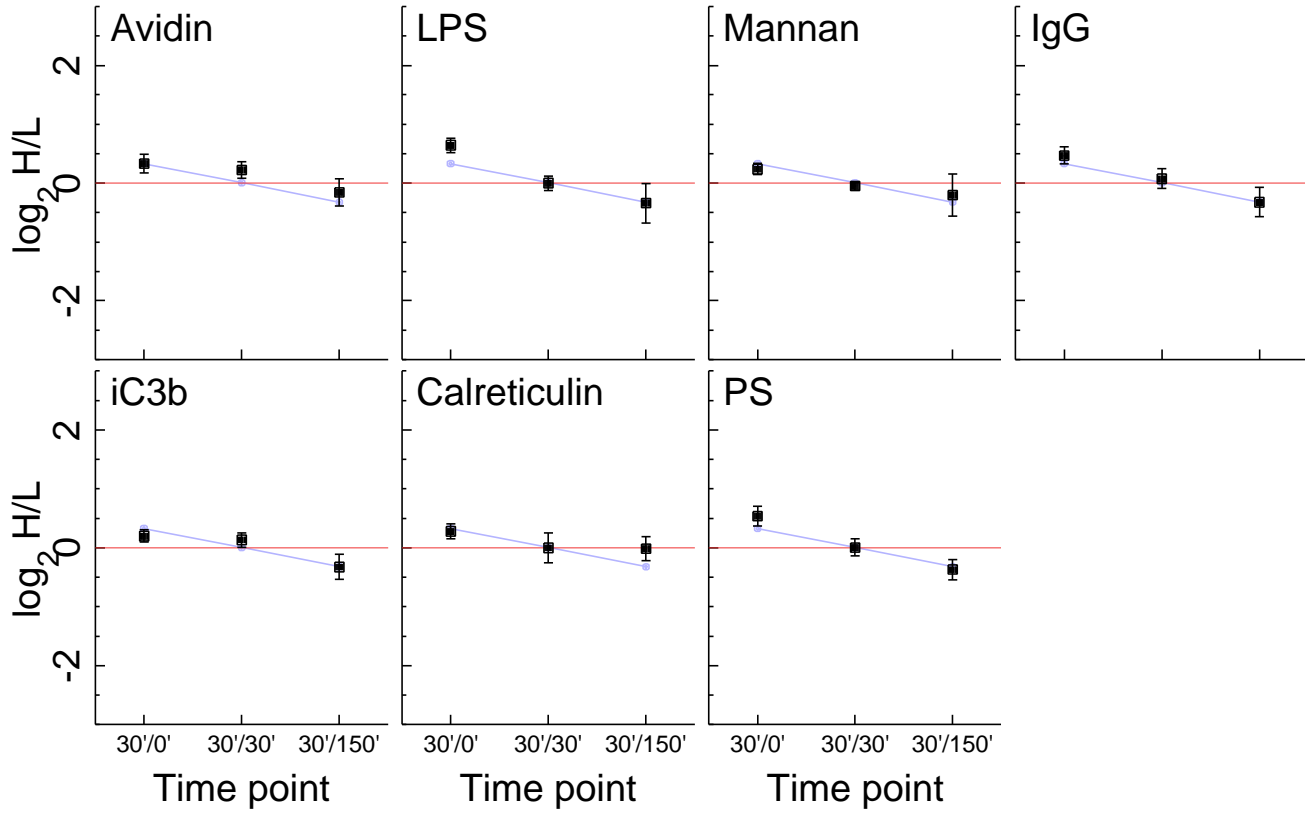

### adam17 (Q9Z0F8)

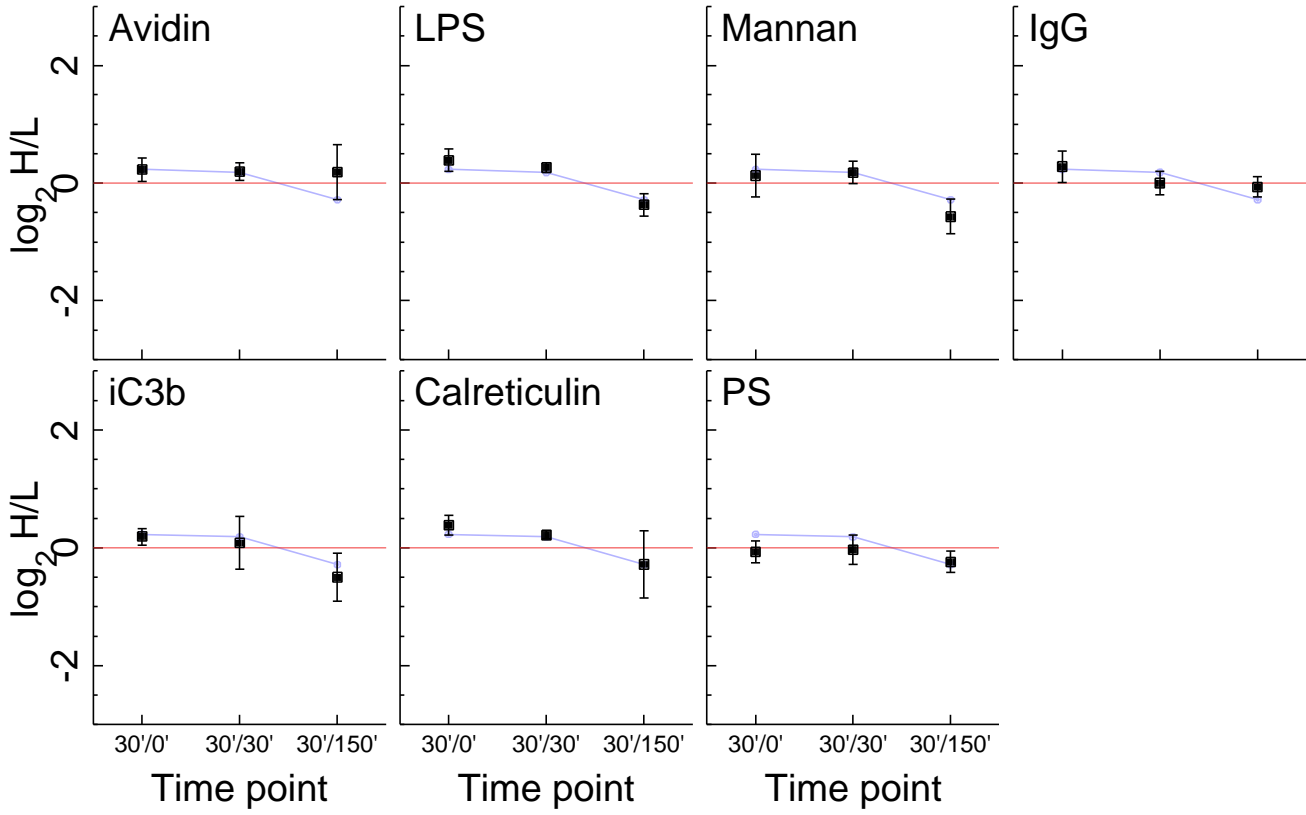

adam8 (Q05910)

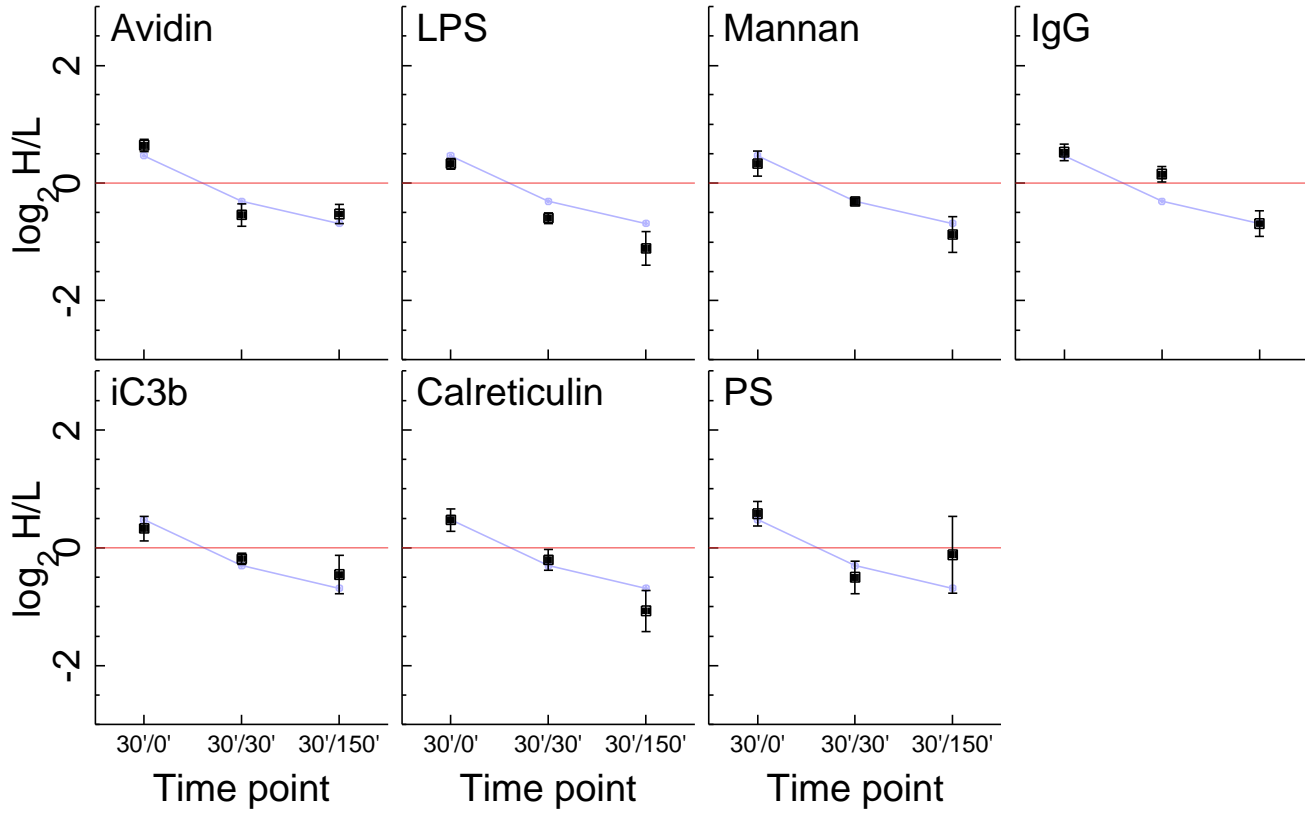

adam9 (Q61072)

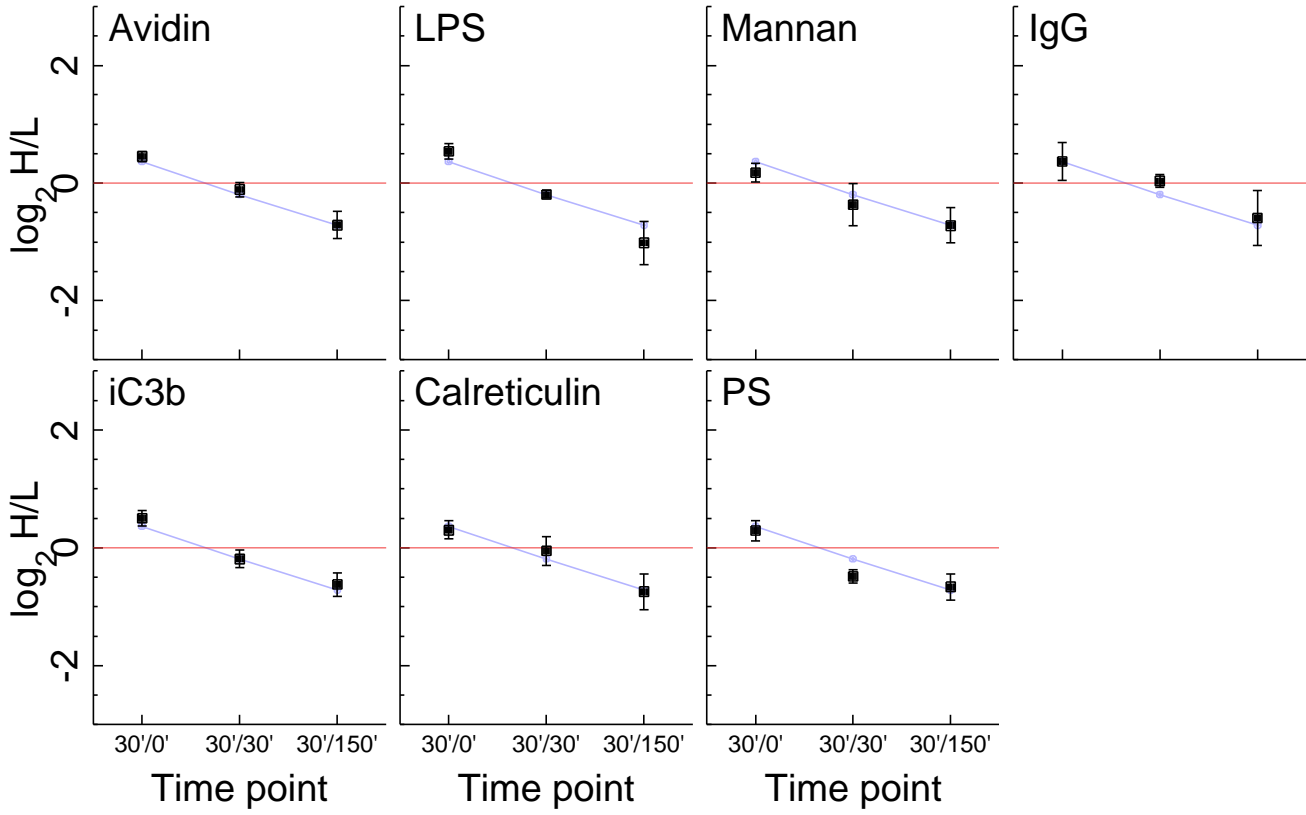

adcy7 (P51829)

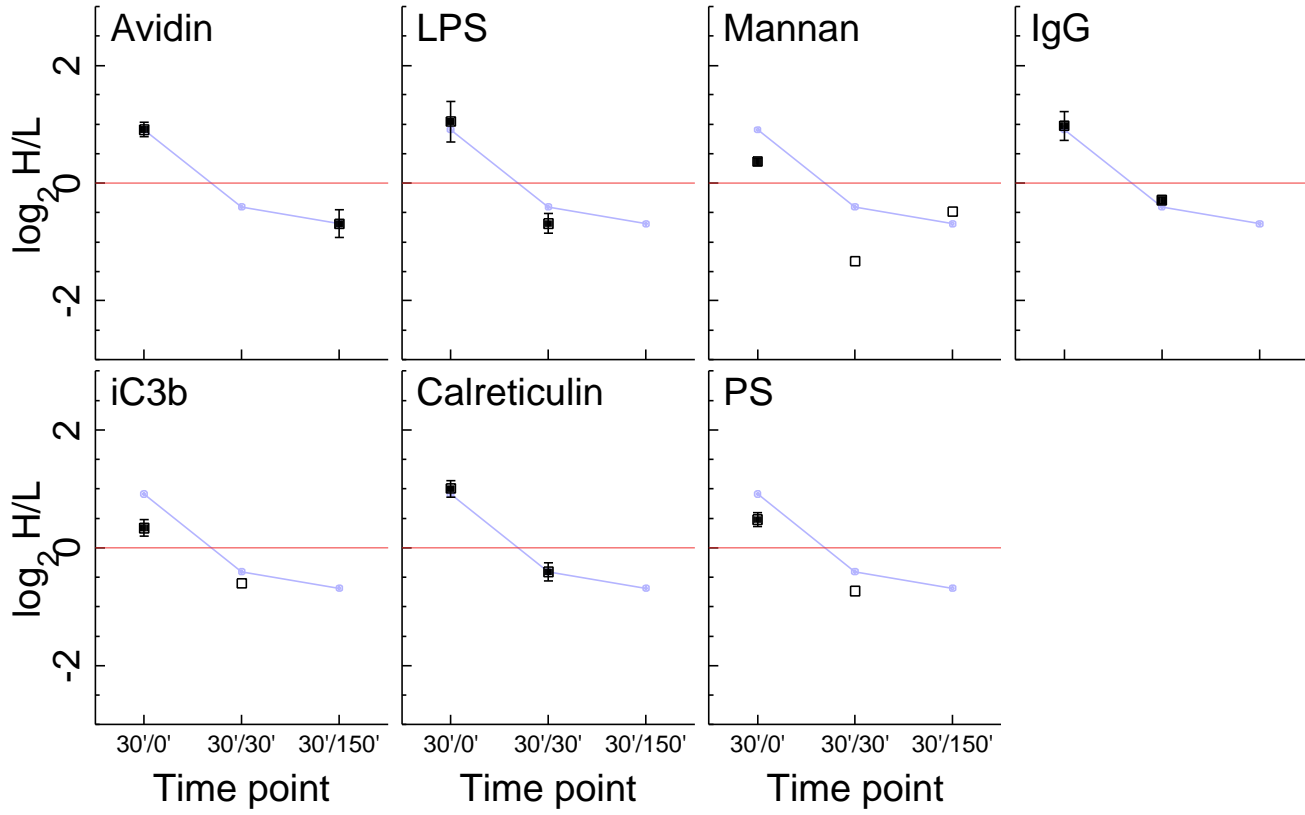

aga (Q64191)

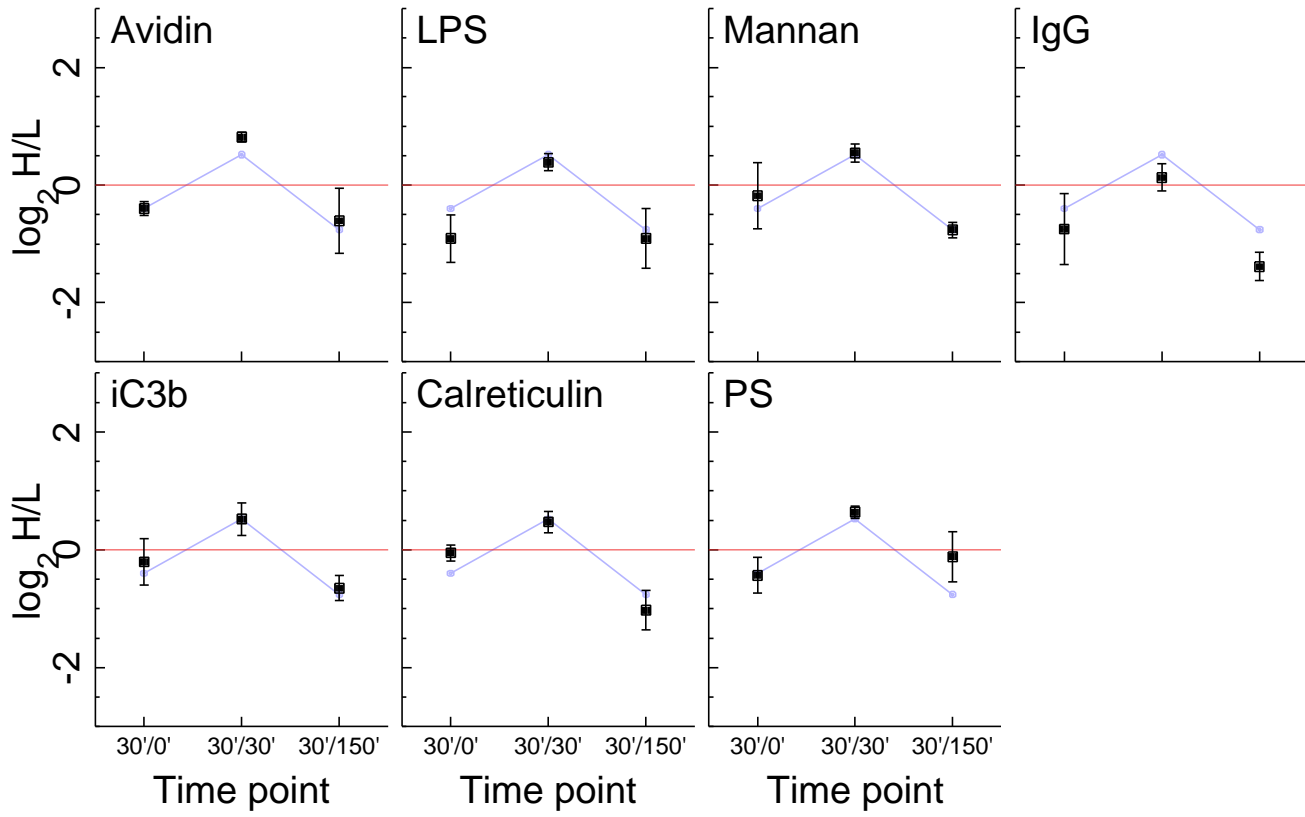



agfg1 (Q8K2K6)

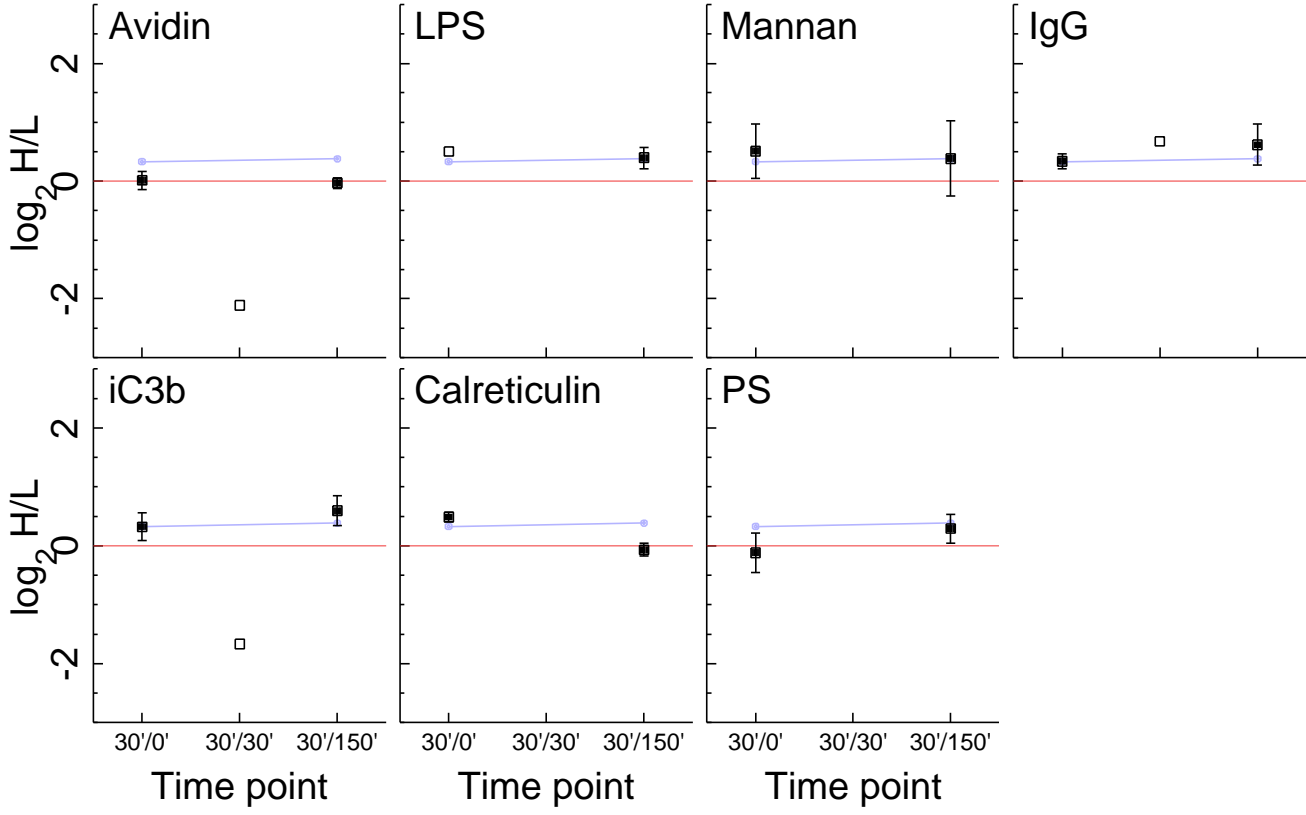

### agfg2 (Q3U2K8)

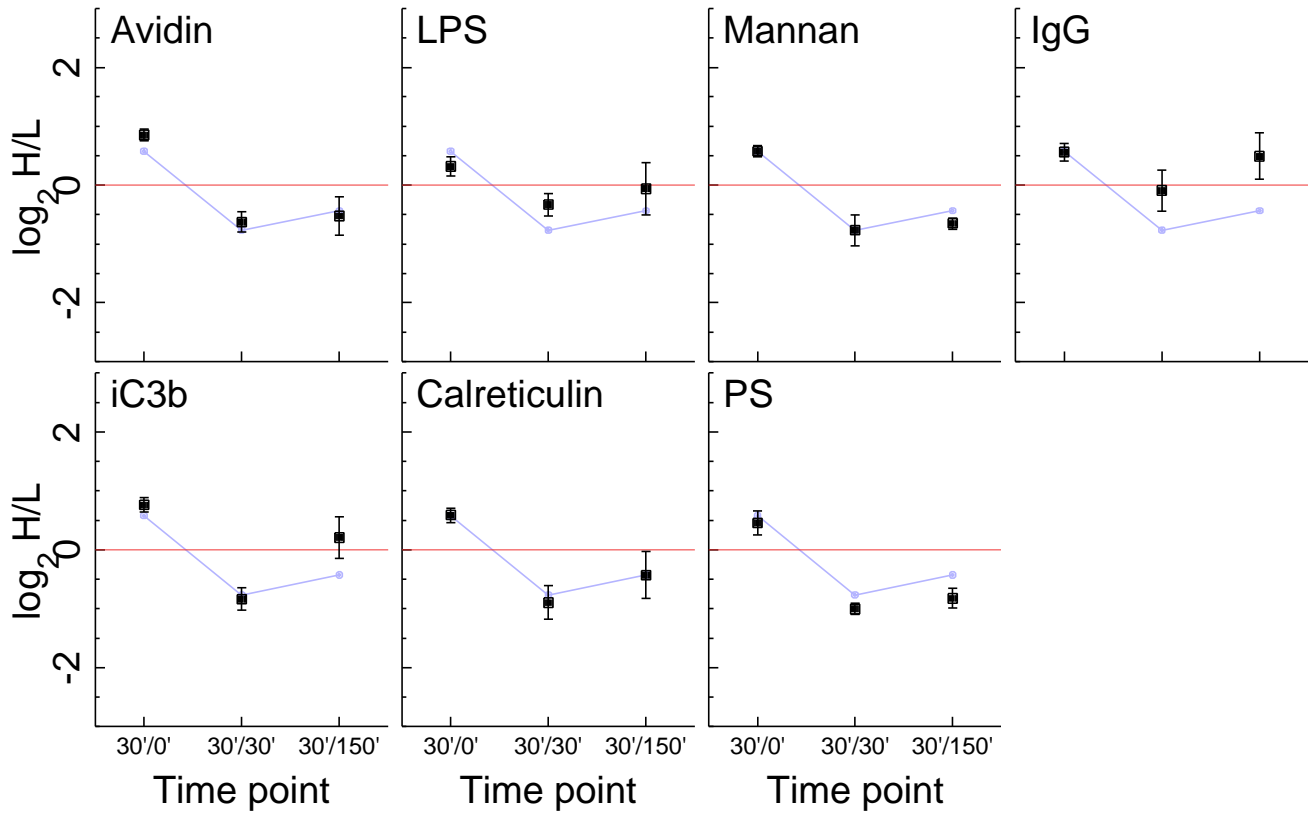

agps (A2AL50)

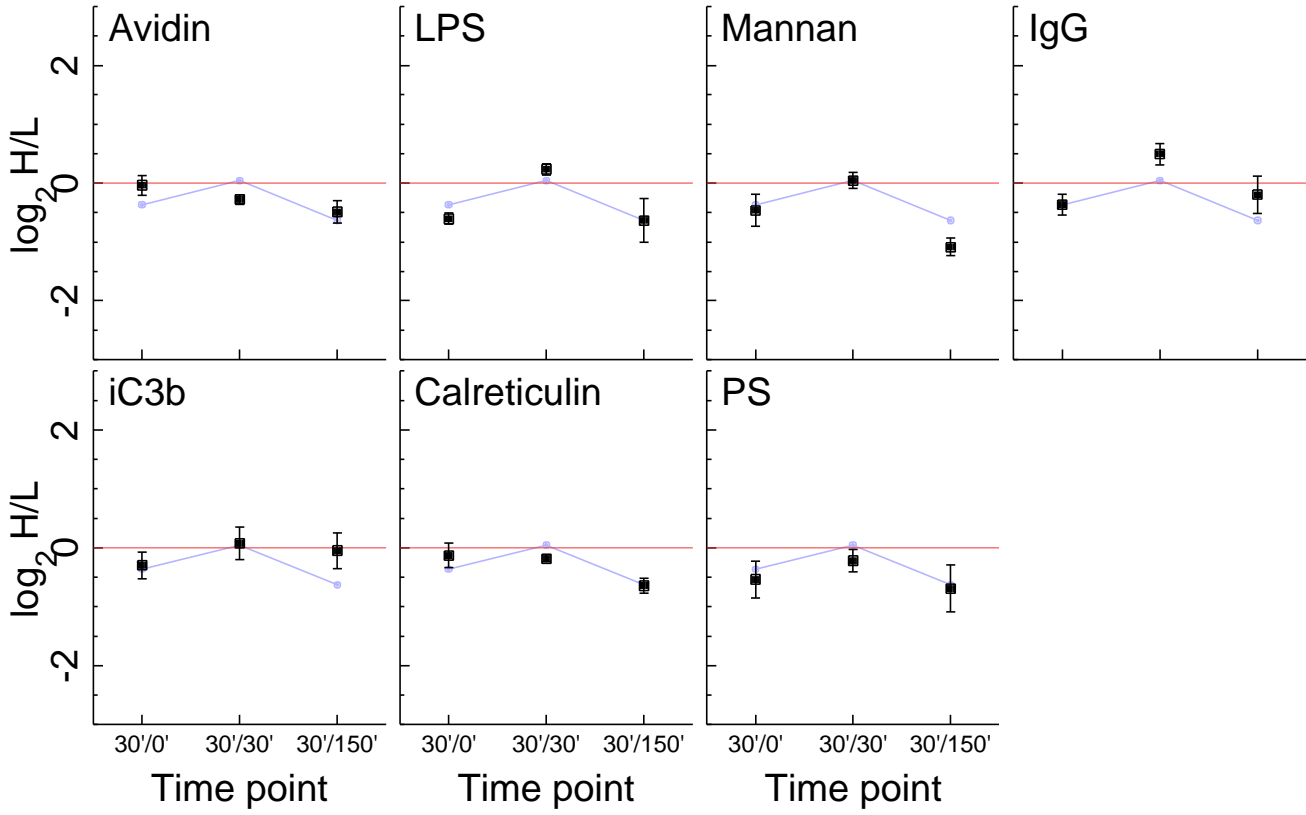

# agtrap (Q9WVK0)

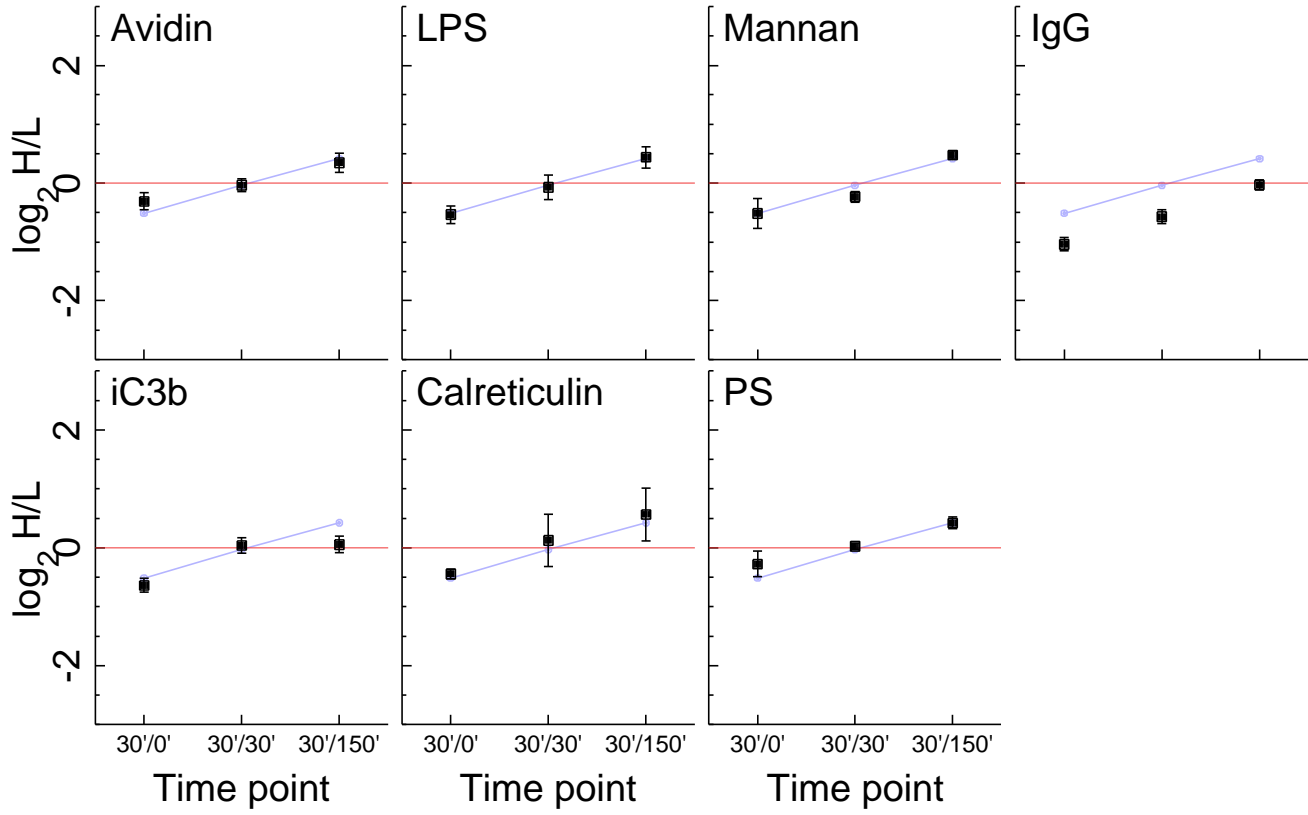

ahnak2:1 (E9PYB0)

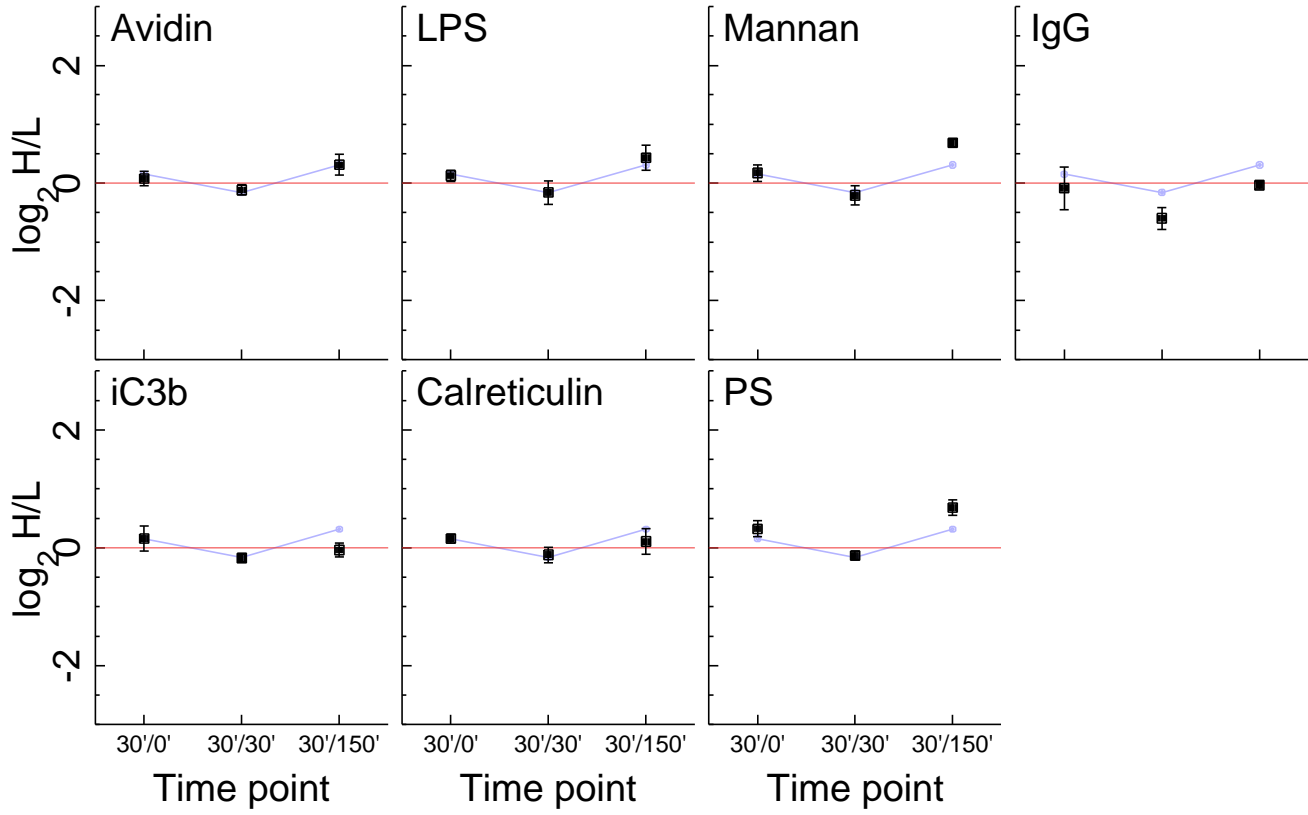

ahnak2:2 (F7CVJ5)

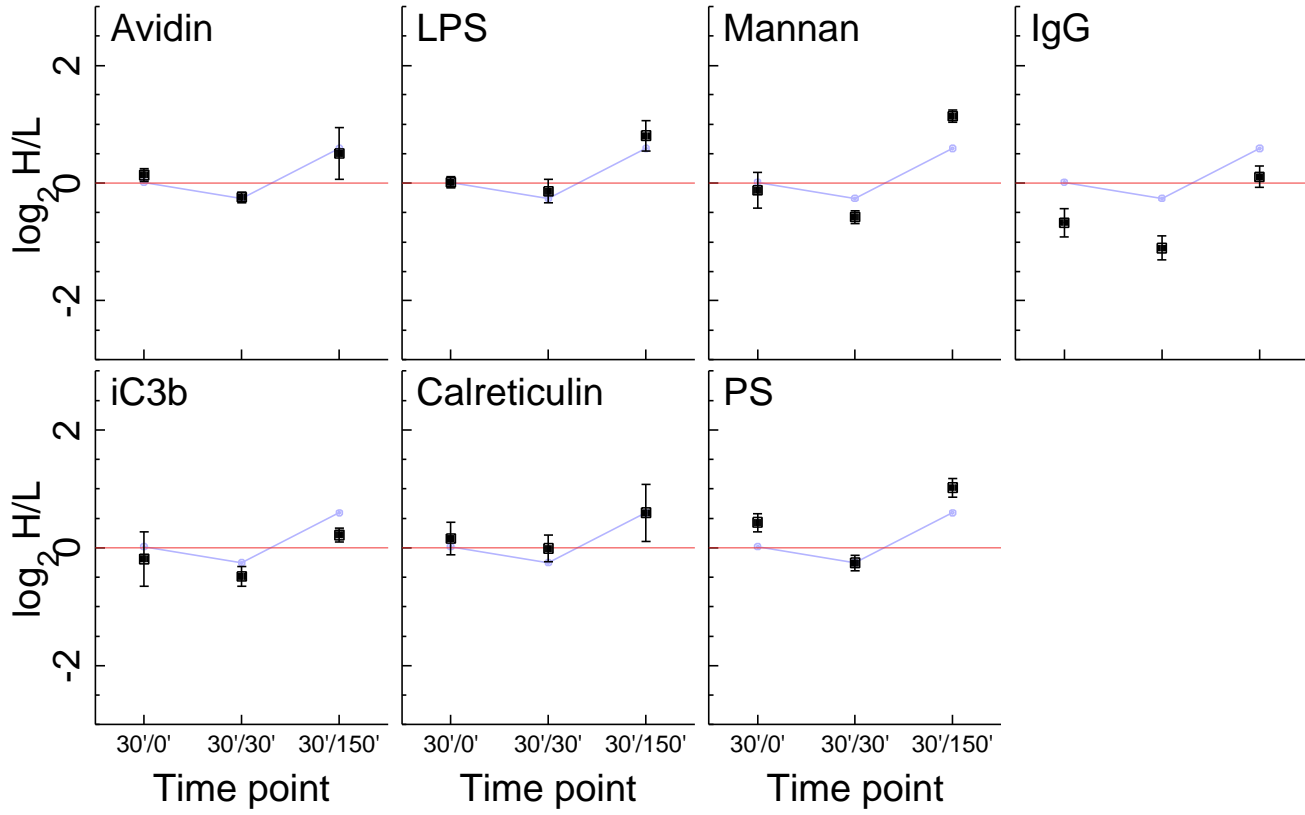

### ahnak2:3 (F7DBB3)

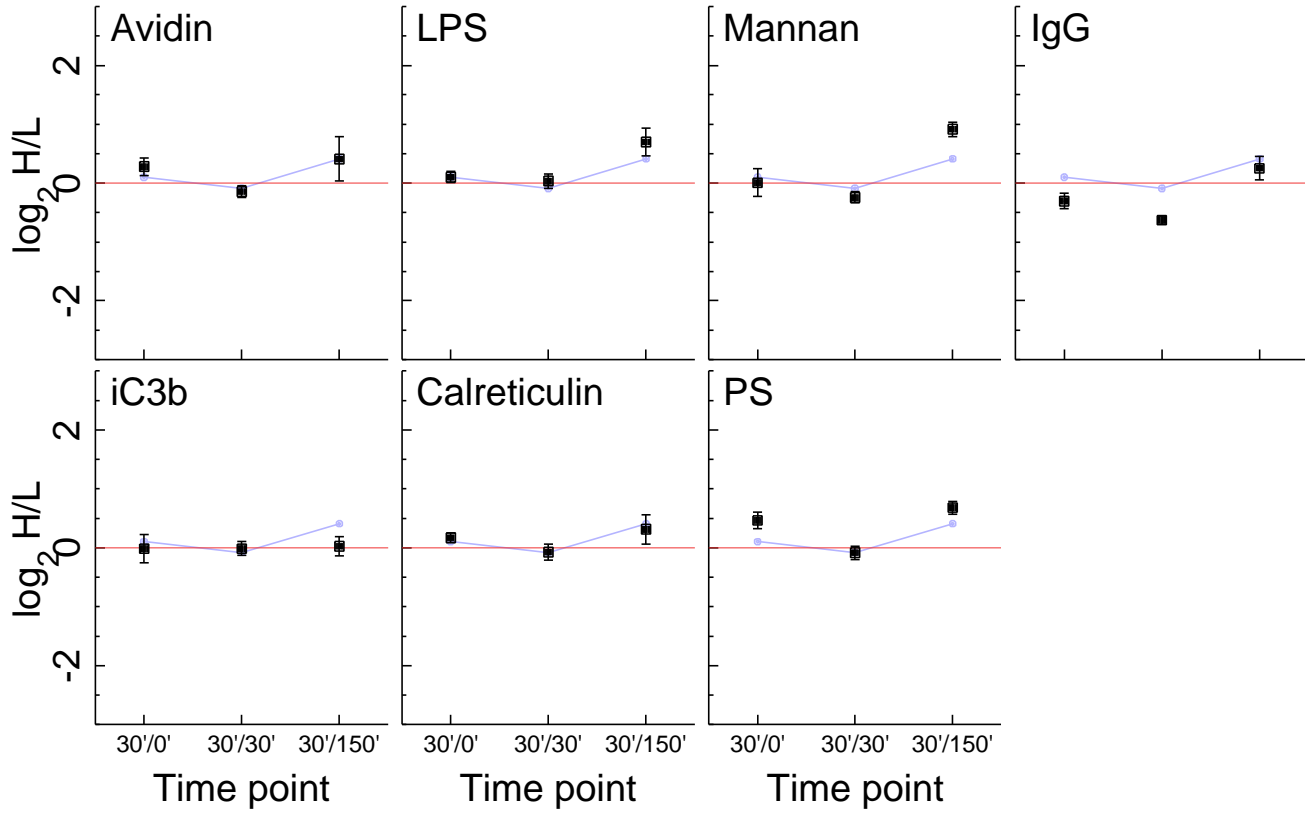

### ahnak (E9Q616)

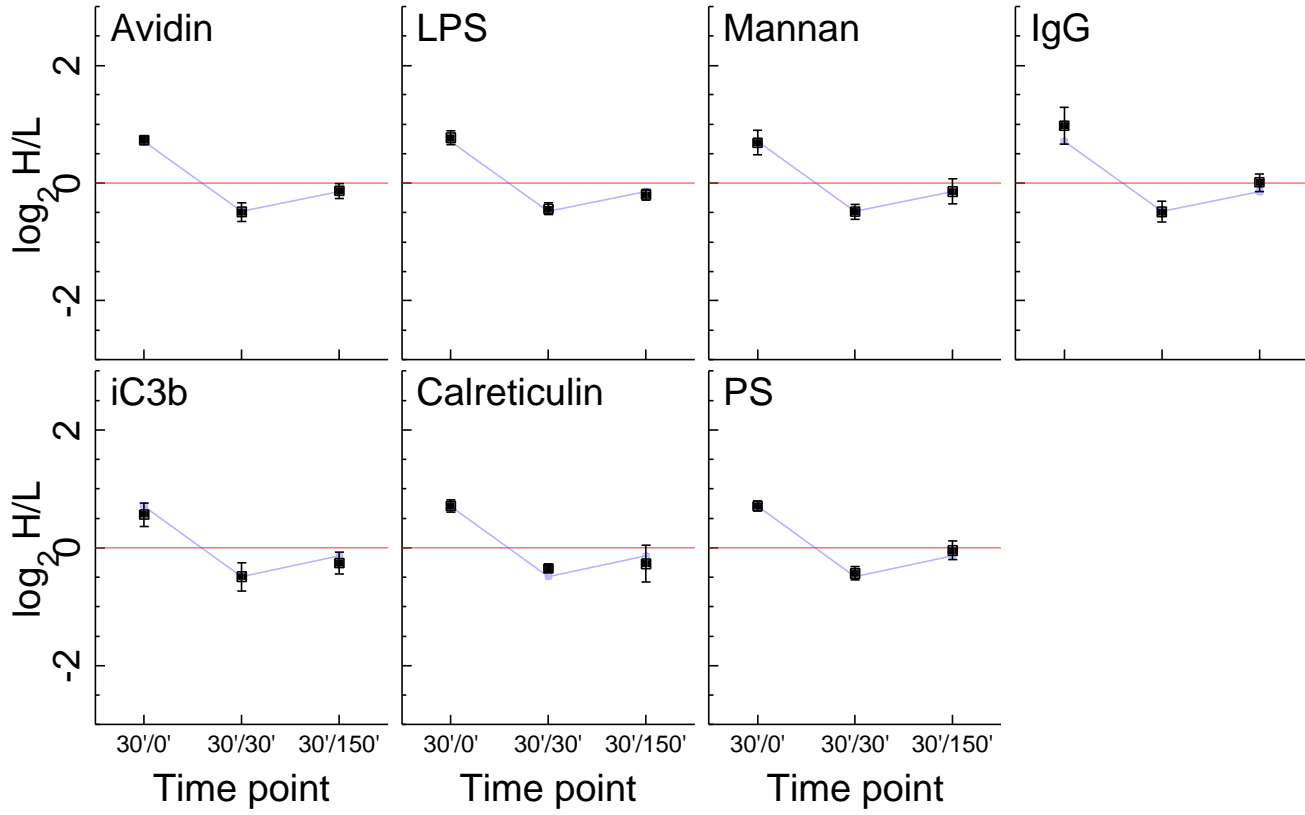



ahsa1 (Q8BK64)

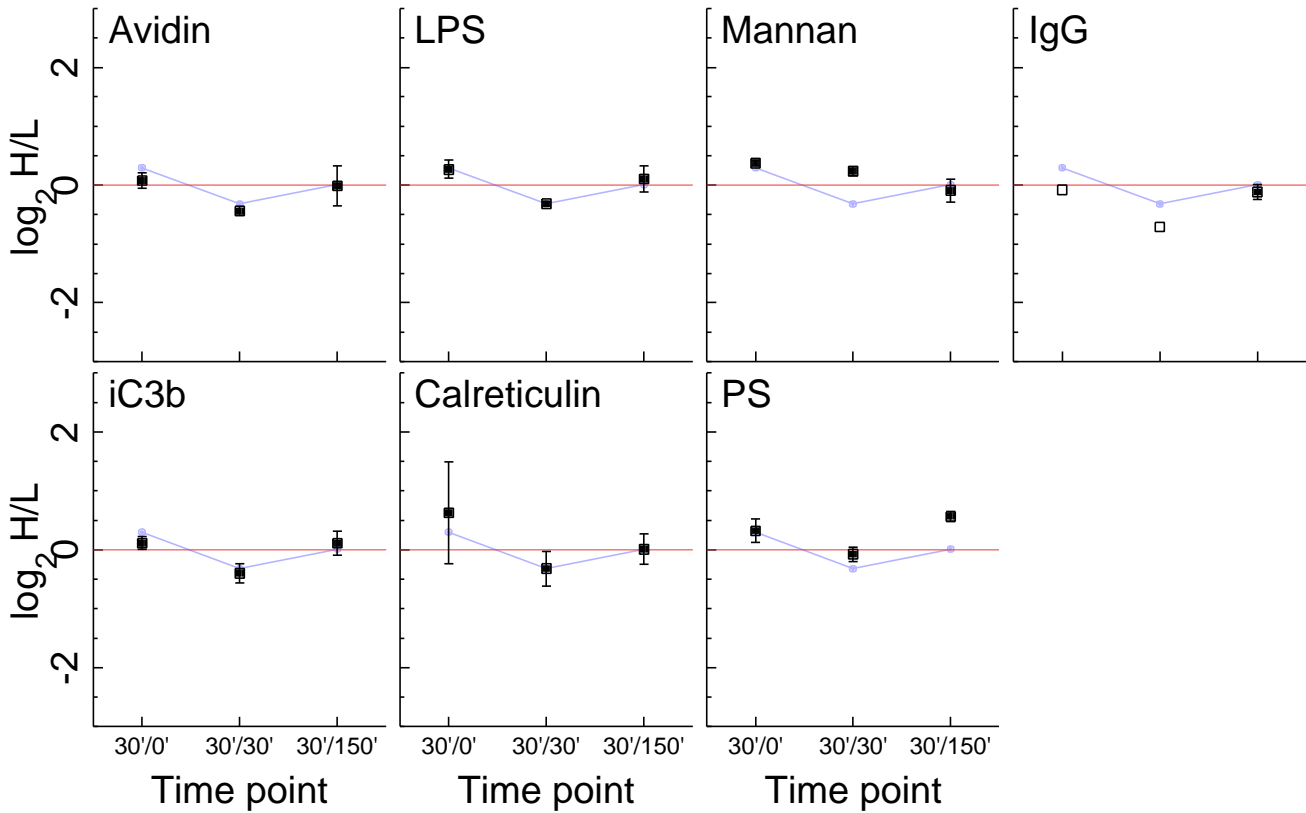

ai607873 (E9Q3L4)

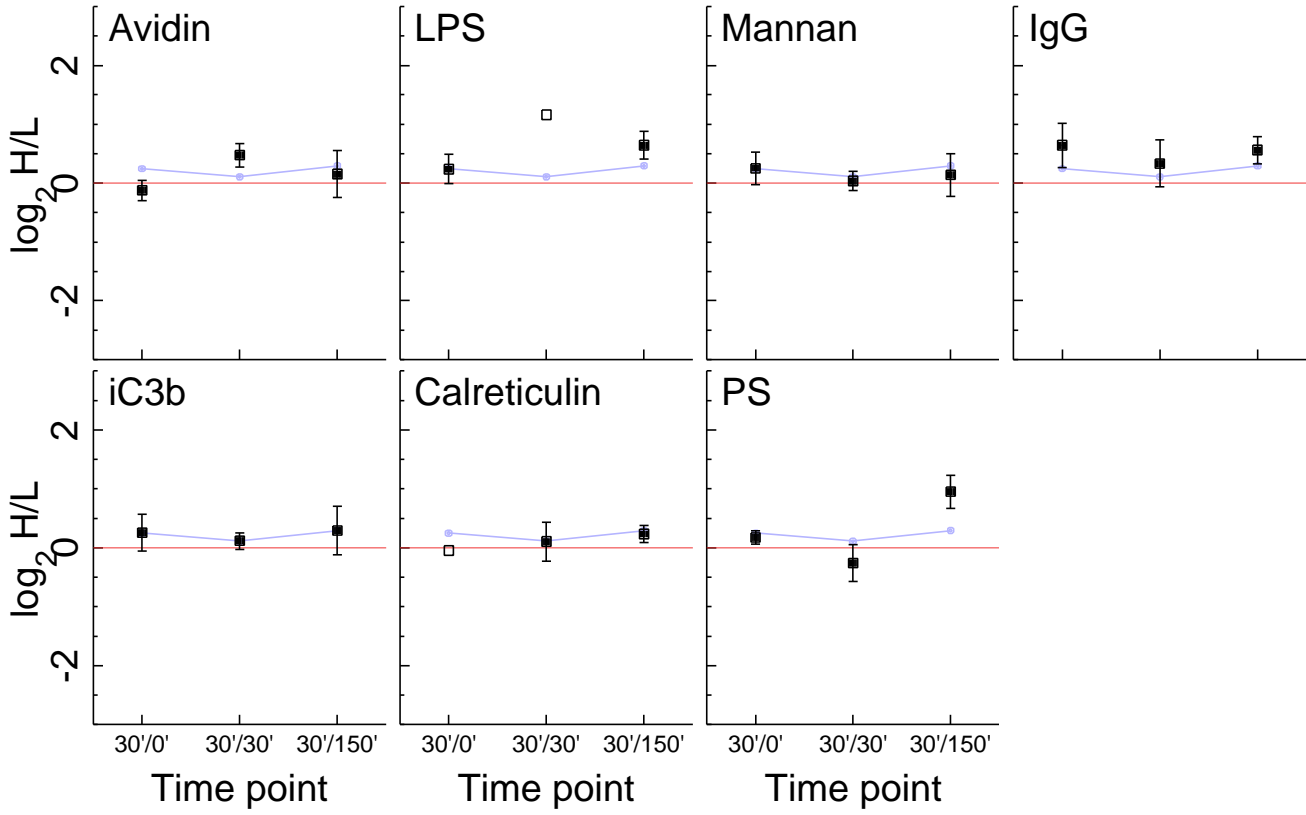

aif1 (O70200)

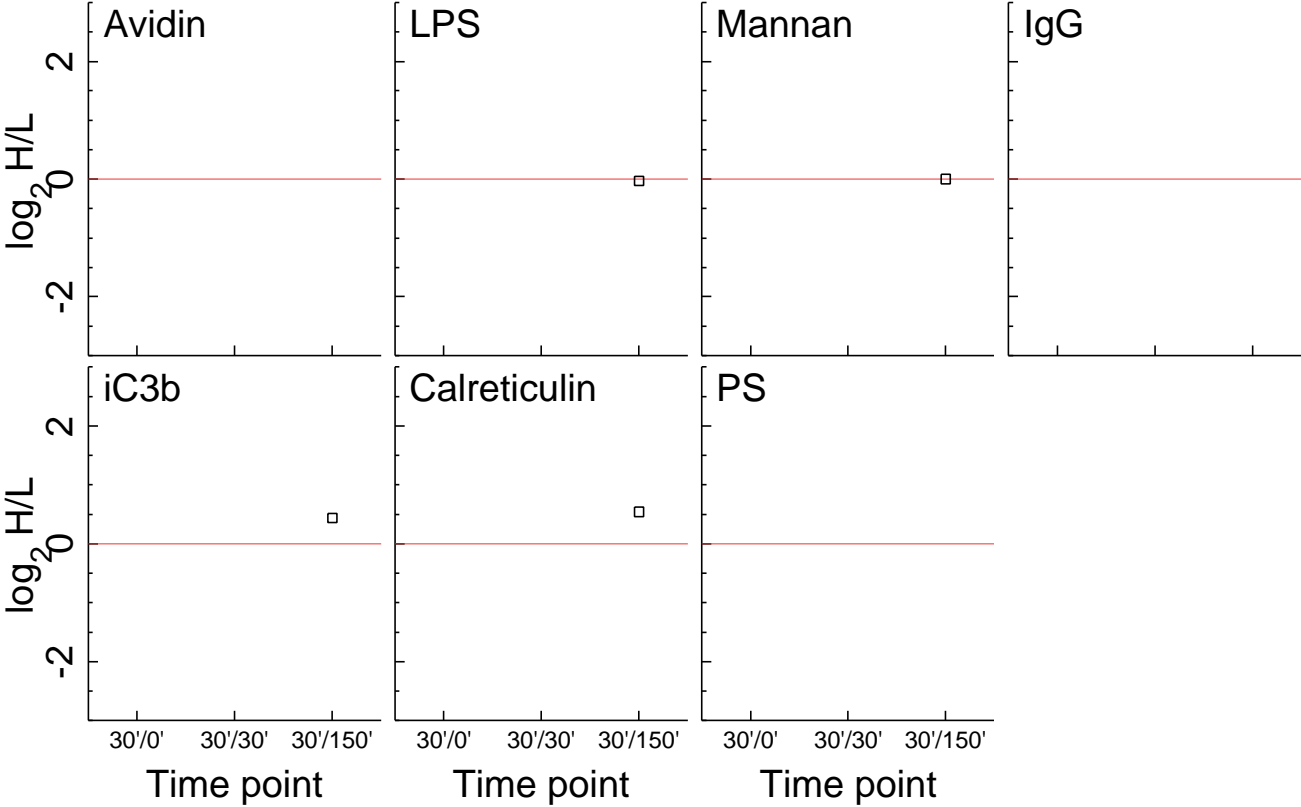

aifm1 (Q9Z0X1)

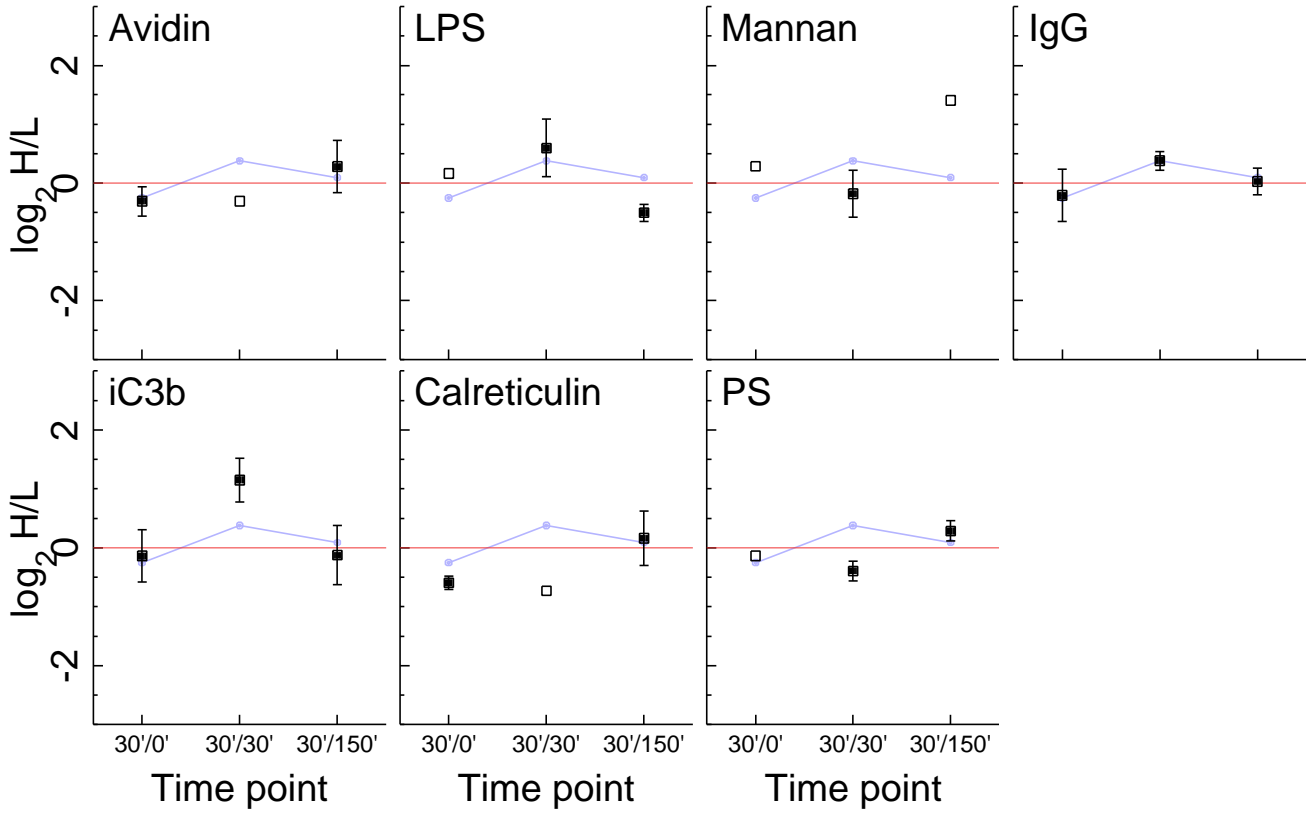

### aifm2 (Q8BUE4)

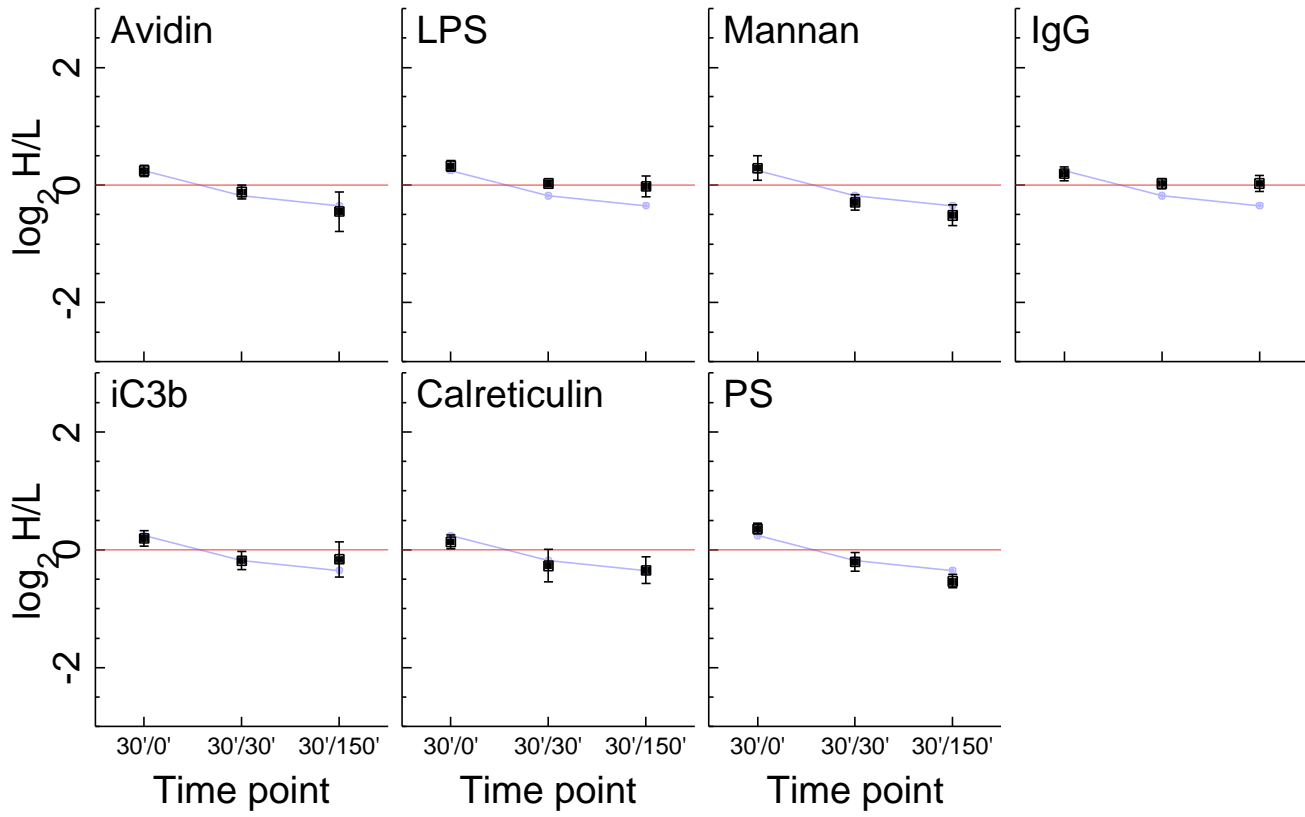

# akap10 (O88845)

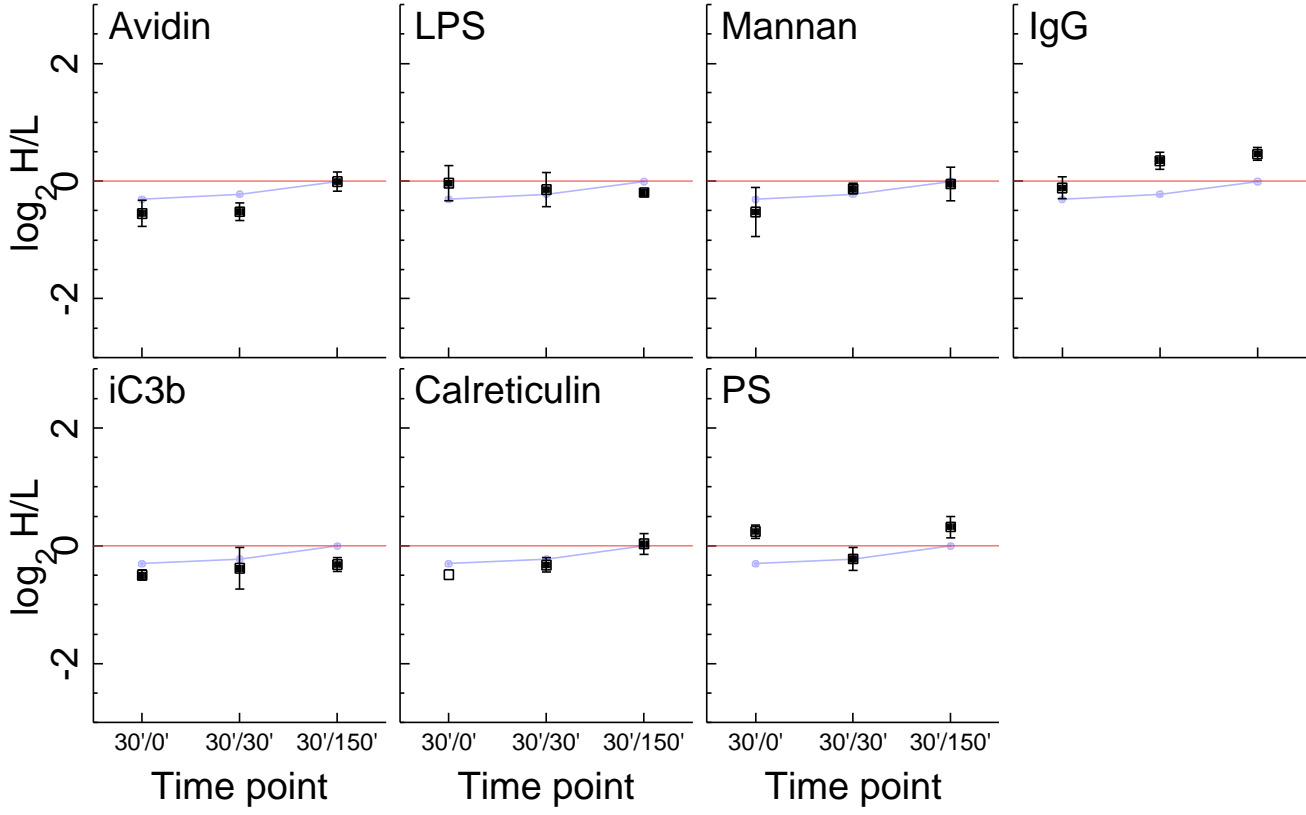

### akr1a1 (Q9JII6)

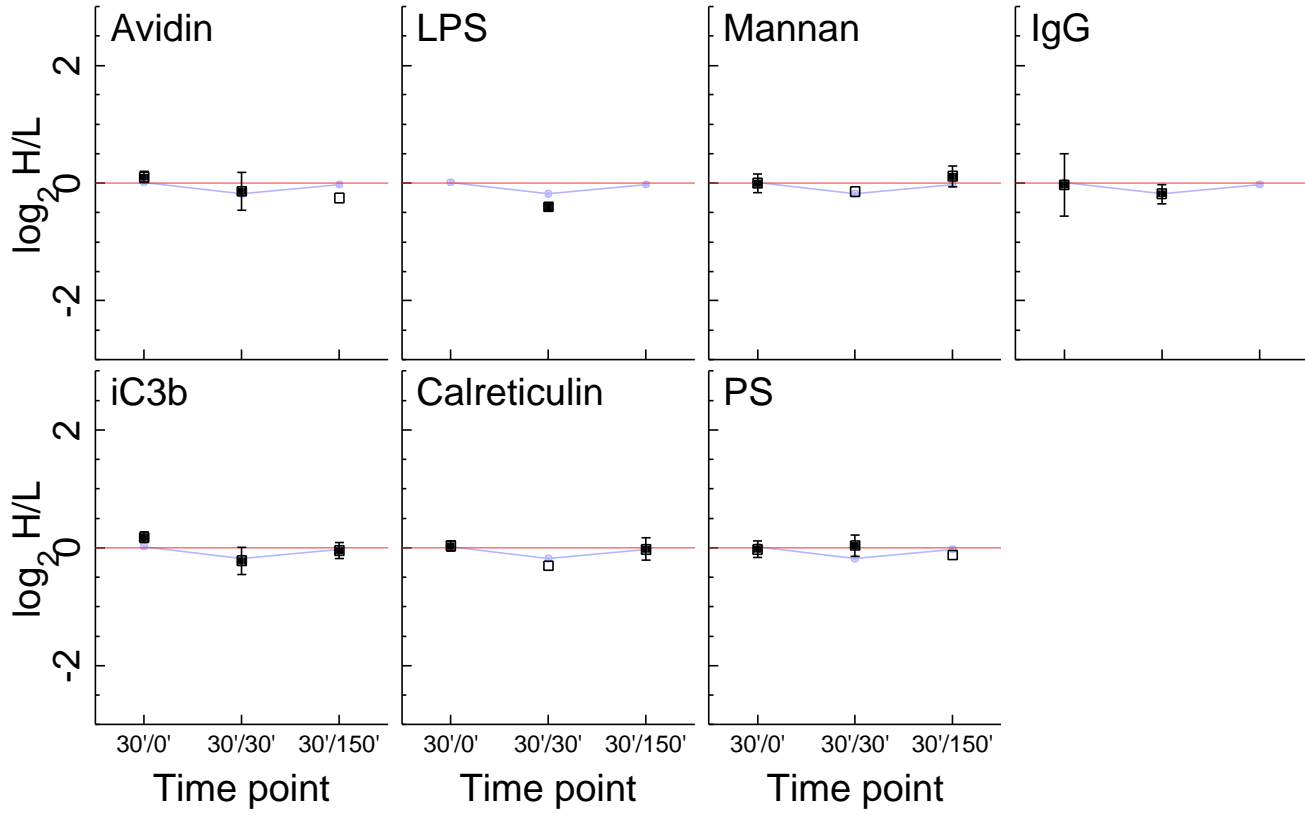

akr1b1 (P45376)

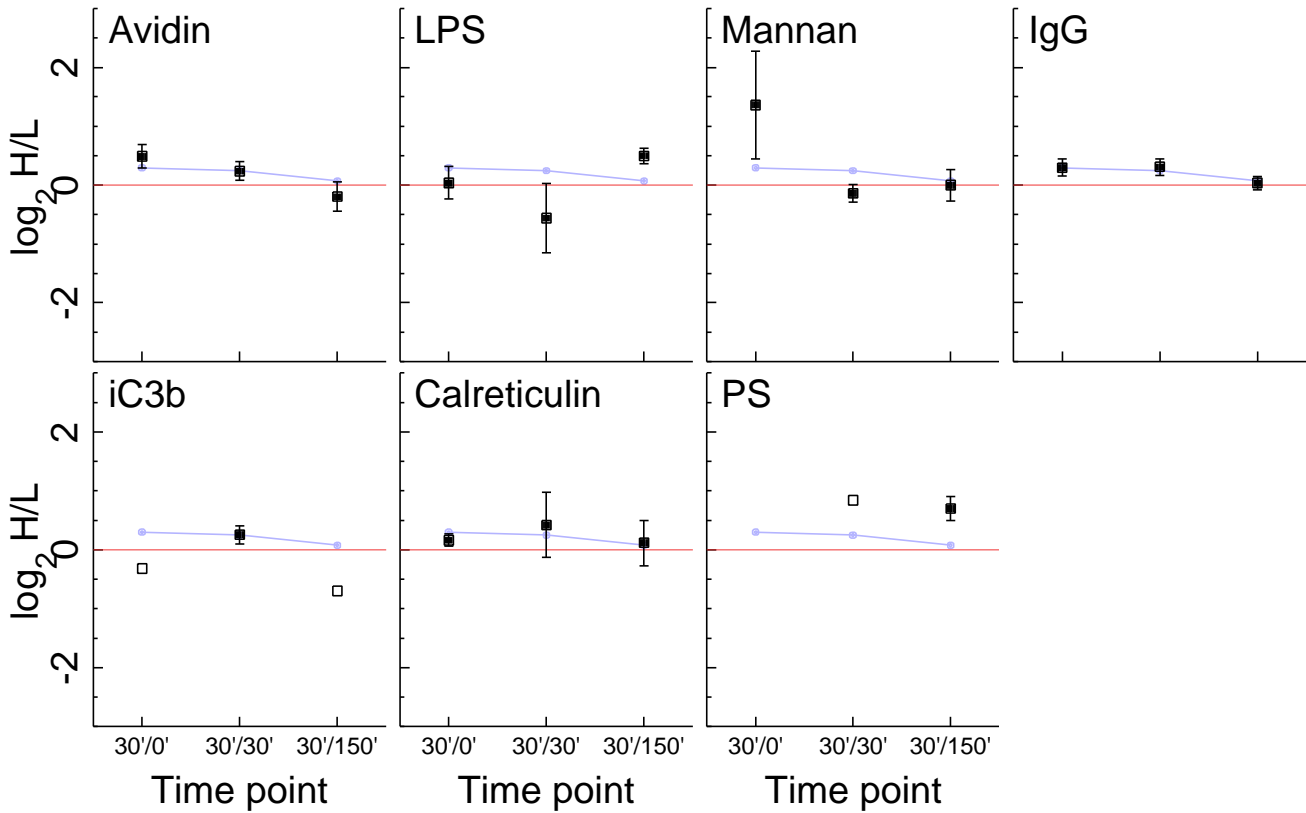



# alcam (Q61490)

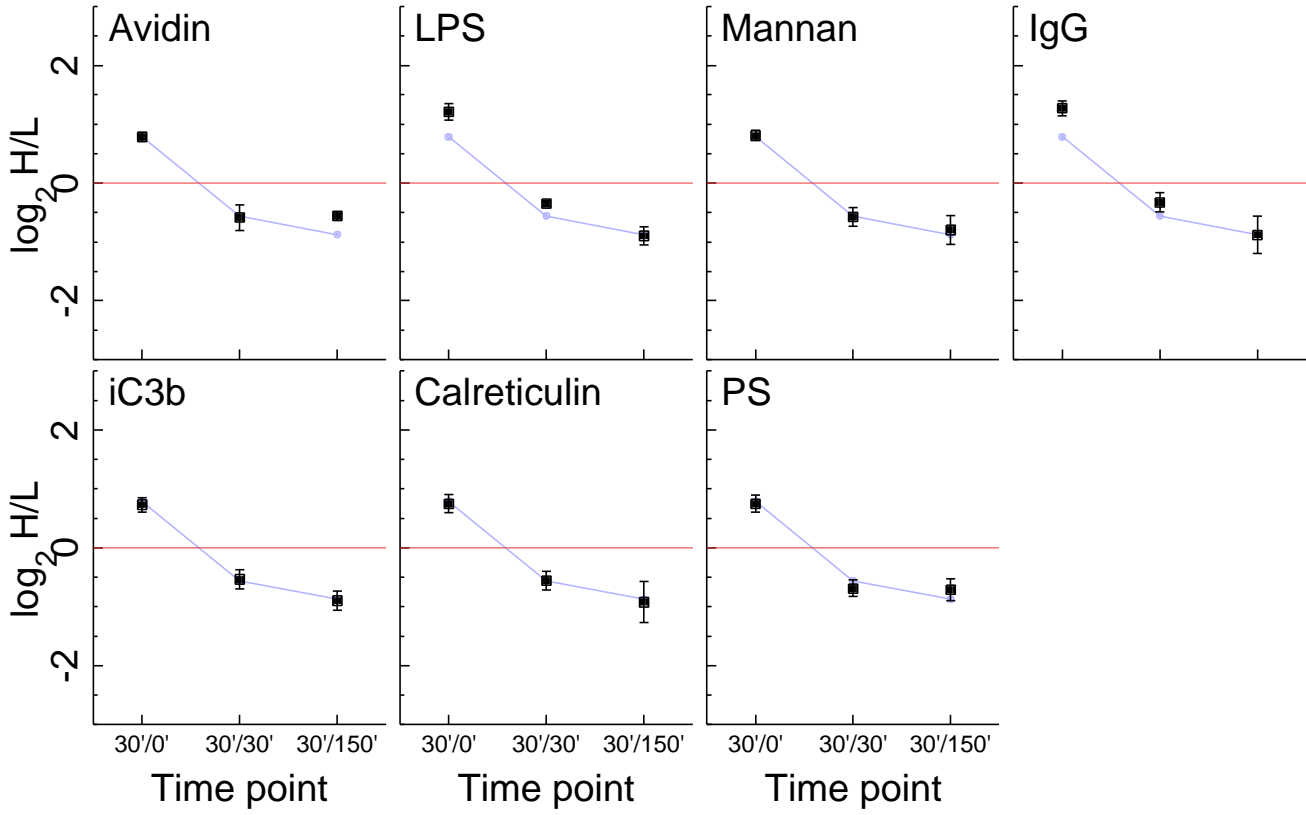

aldh2 (P47738)

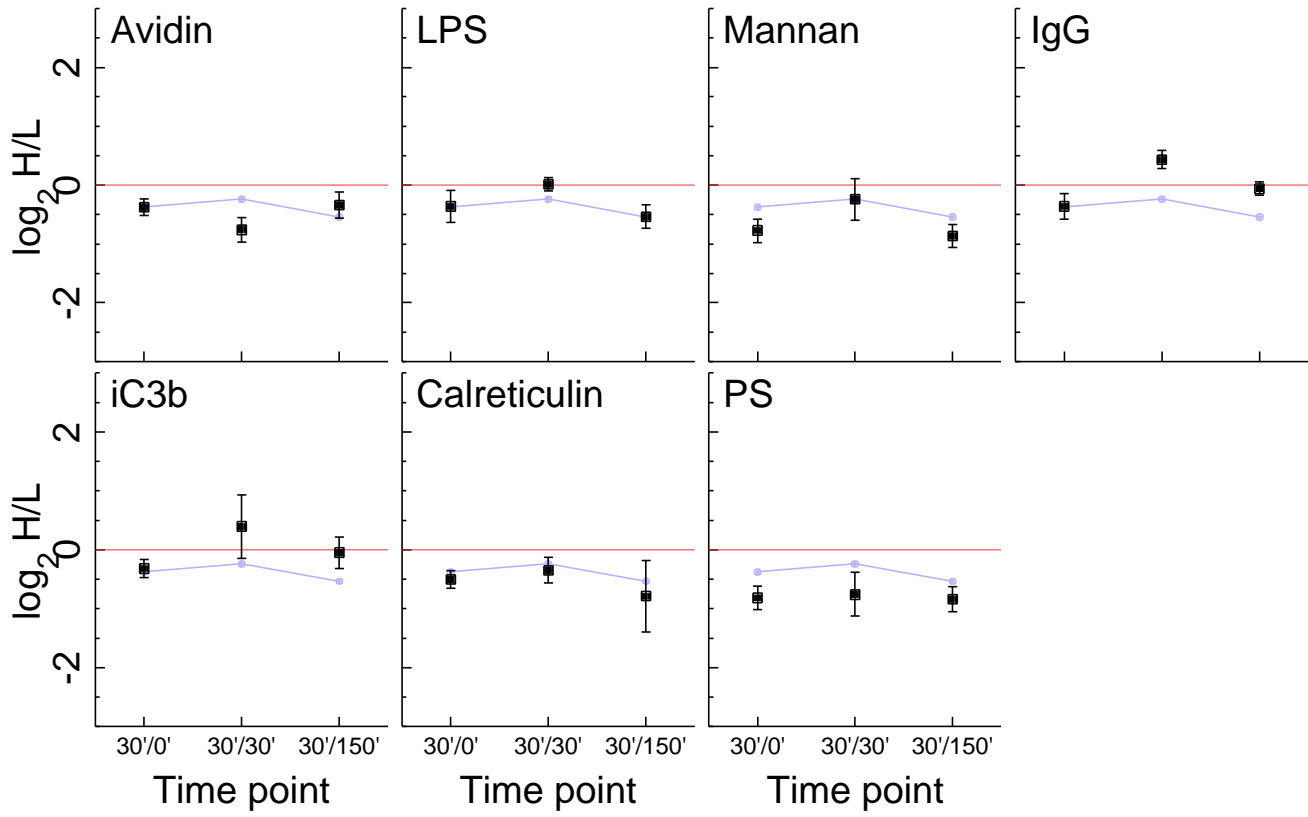

### aldh3a2 (B1ATI0)

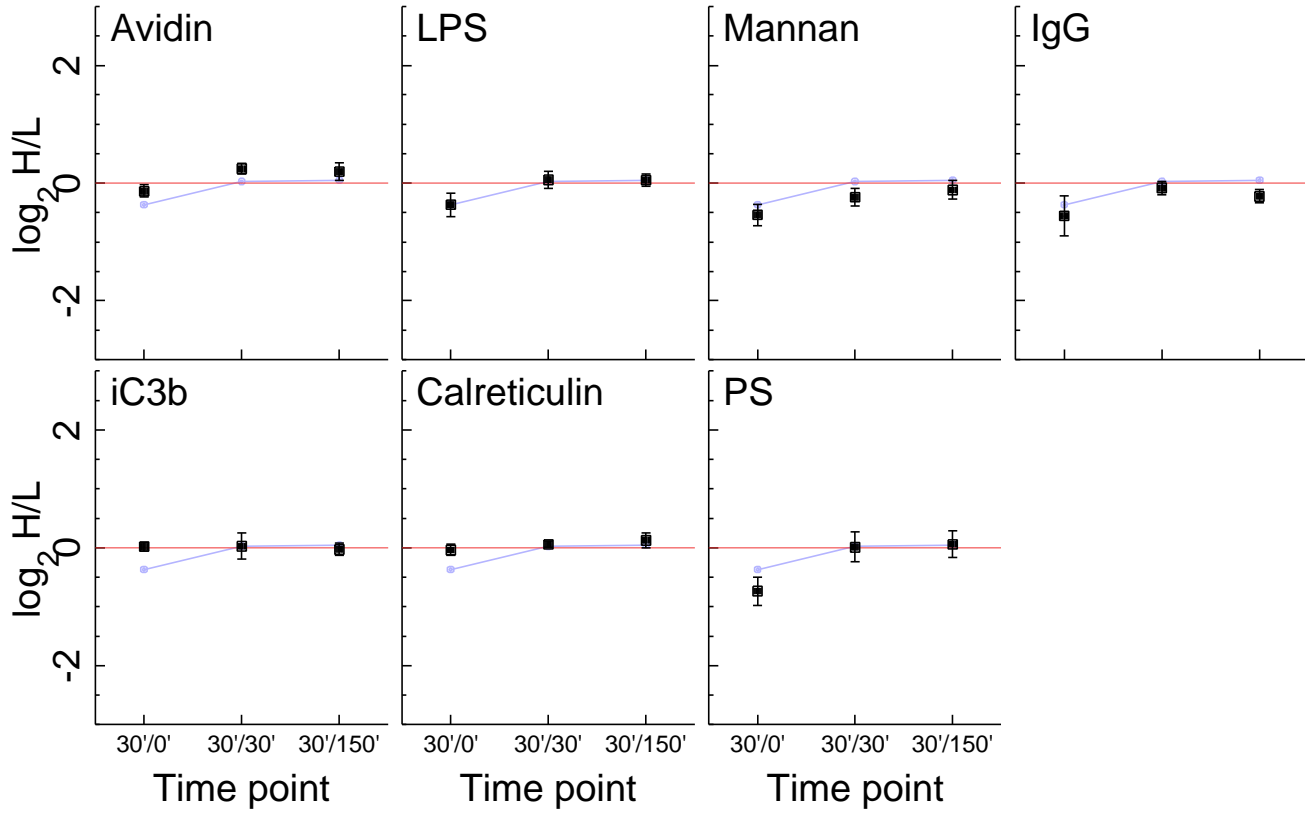

### aldh3b1 (Q80VQ0)

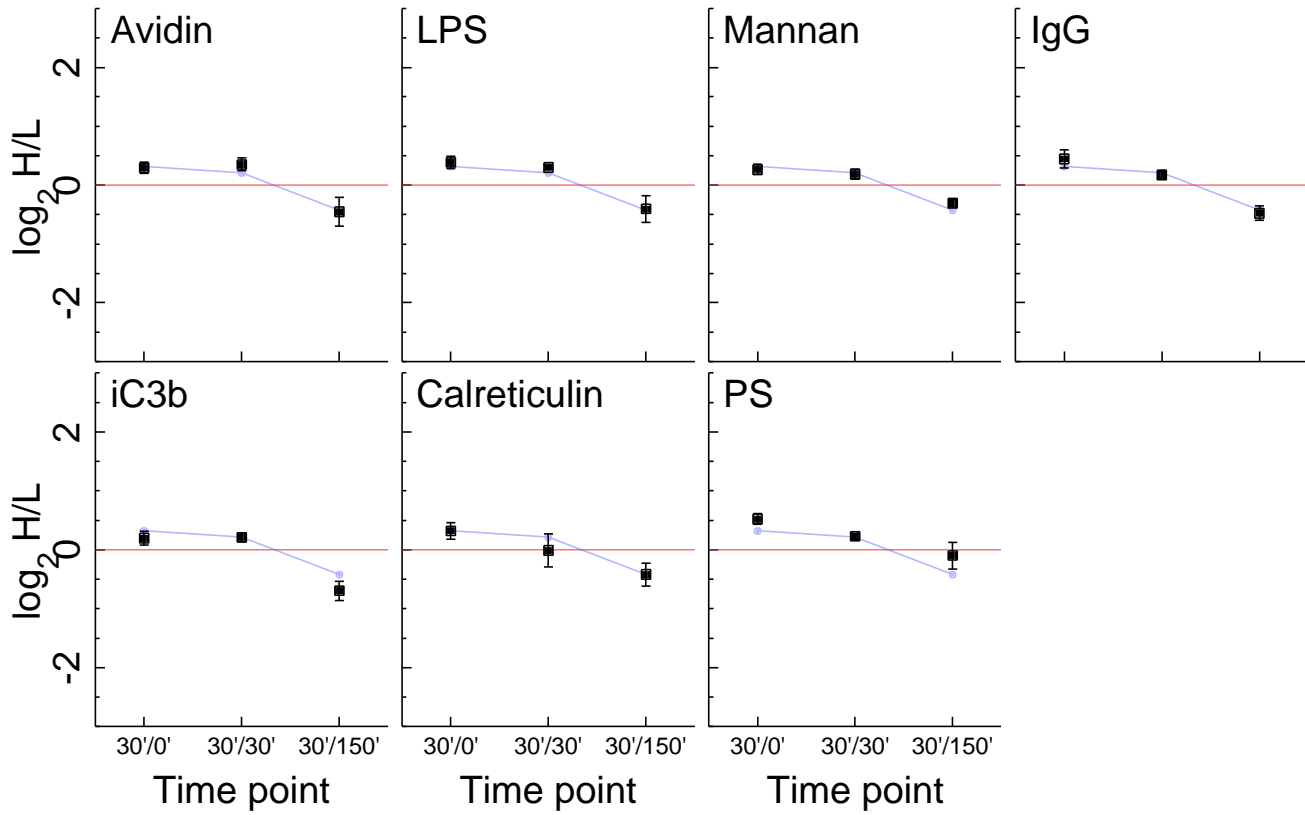

### aldh9a1 (Q3U367)

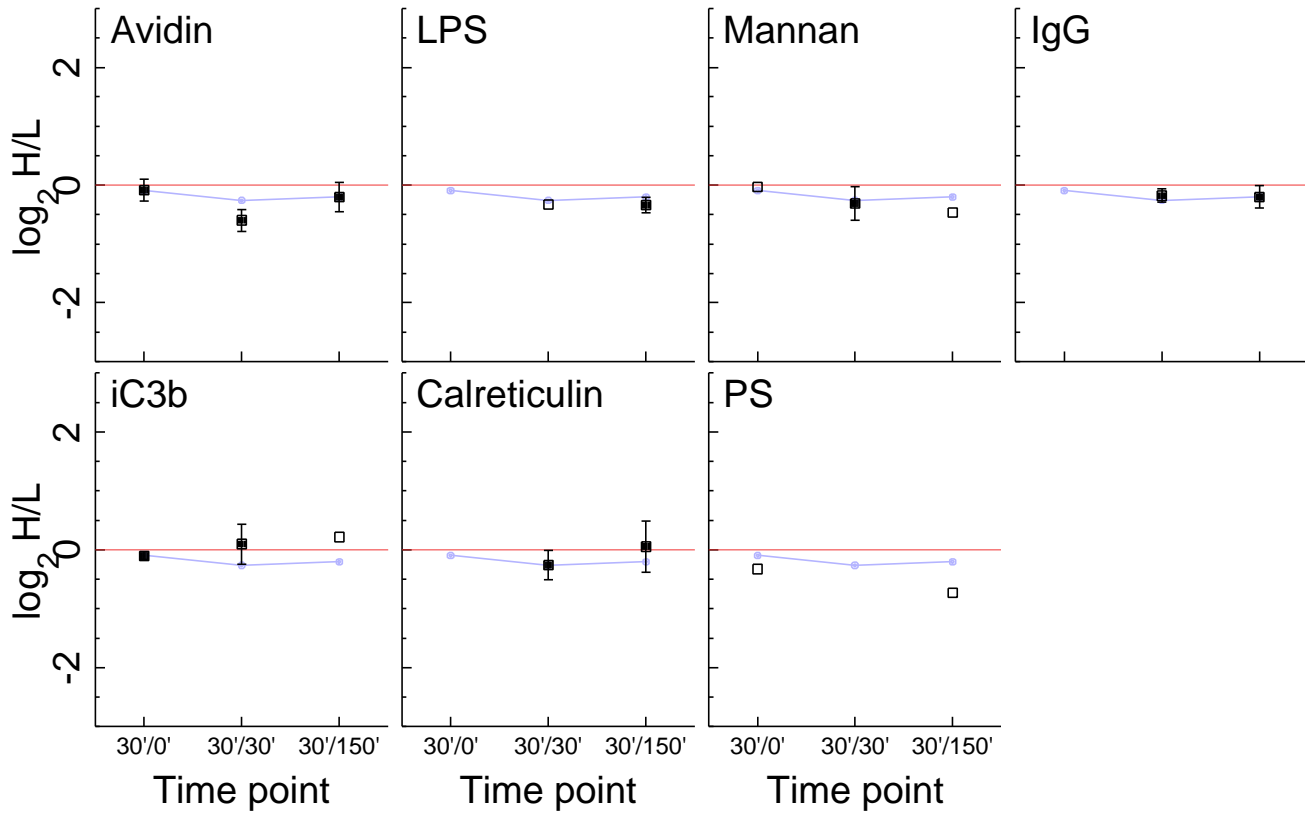

### aldoa (A6ZI44)

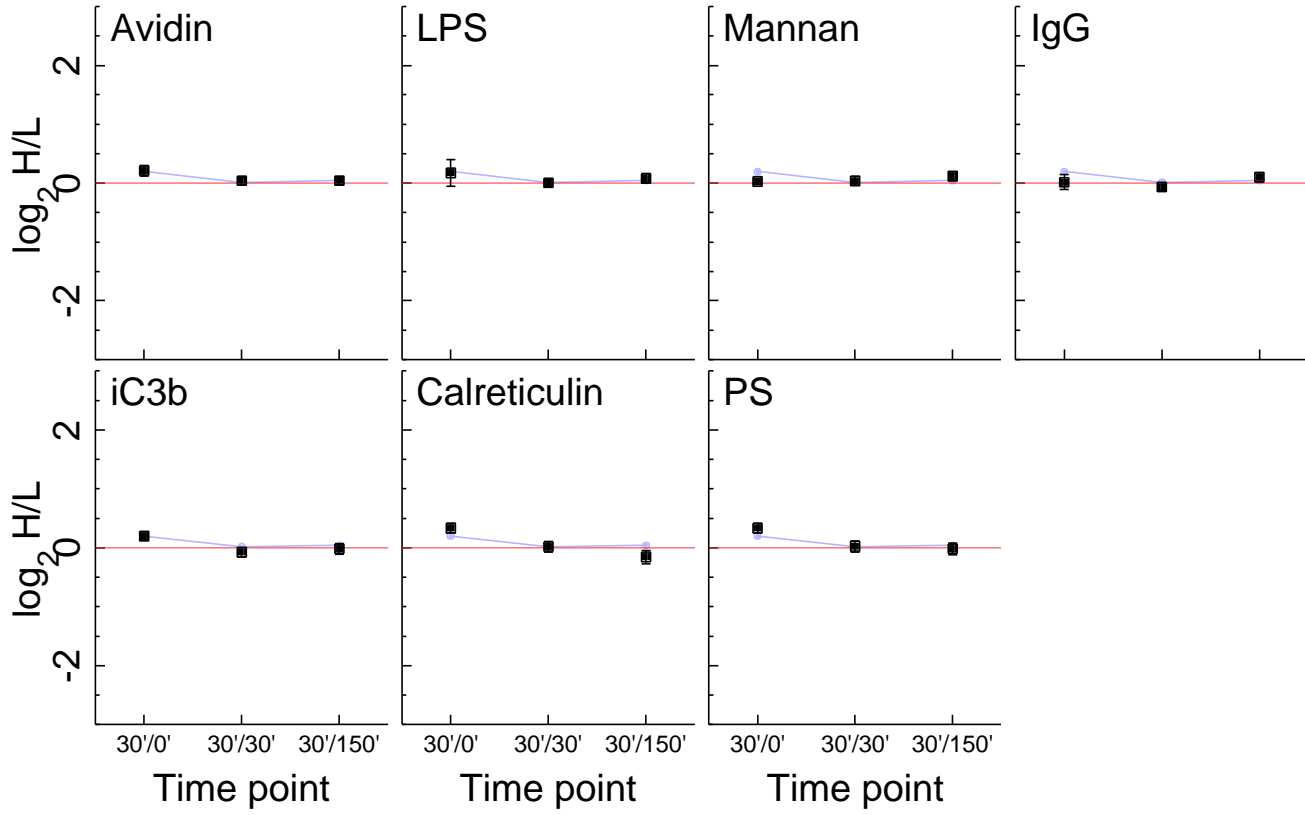

### alg2 (Q9DBE8)

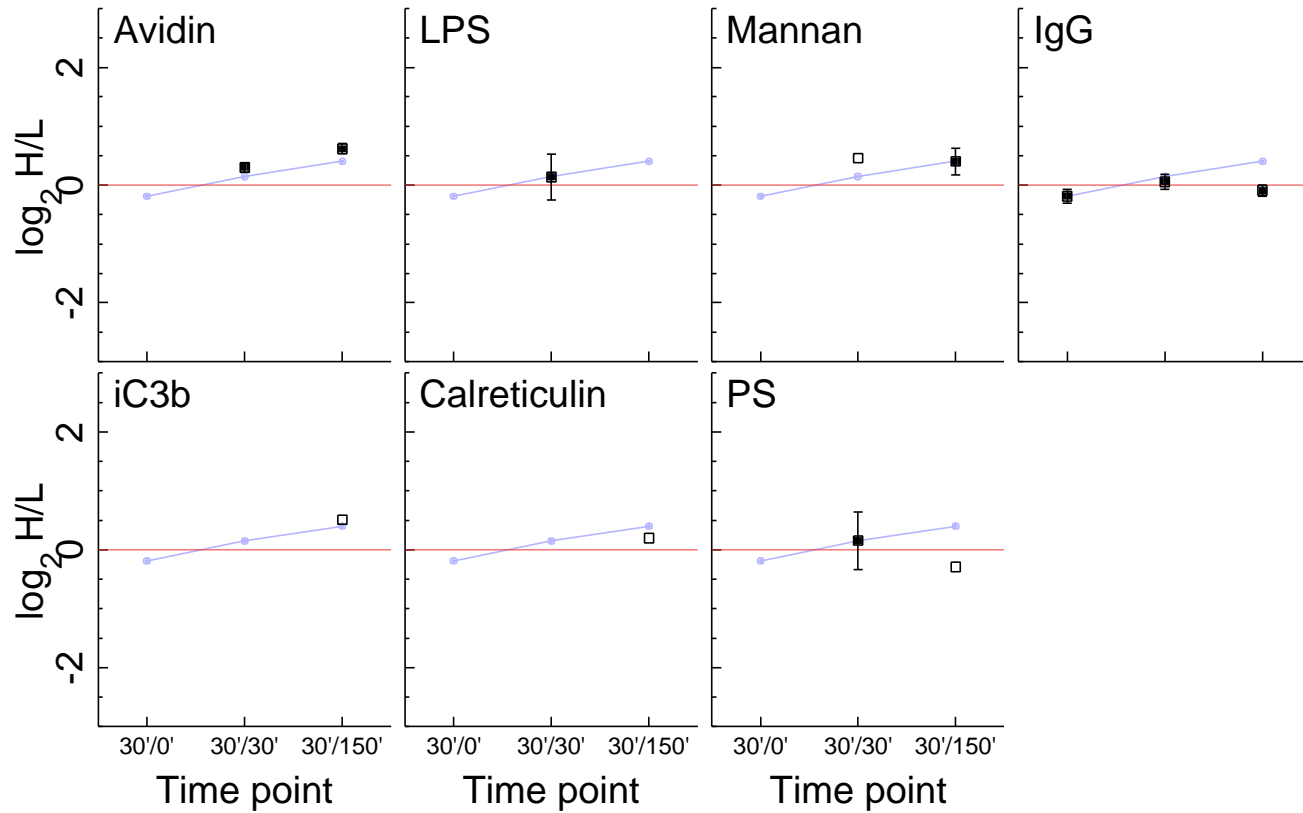

### alg5 (Q9DB25)

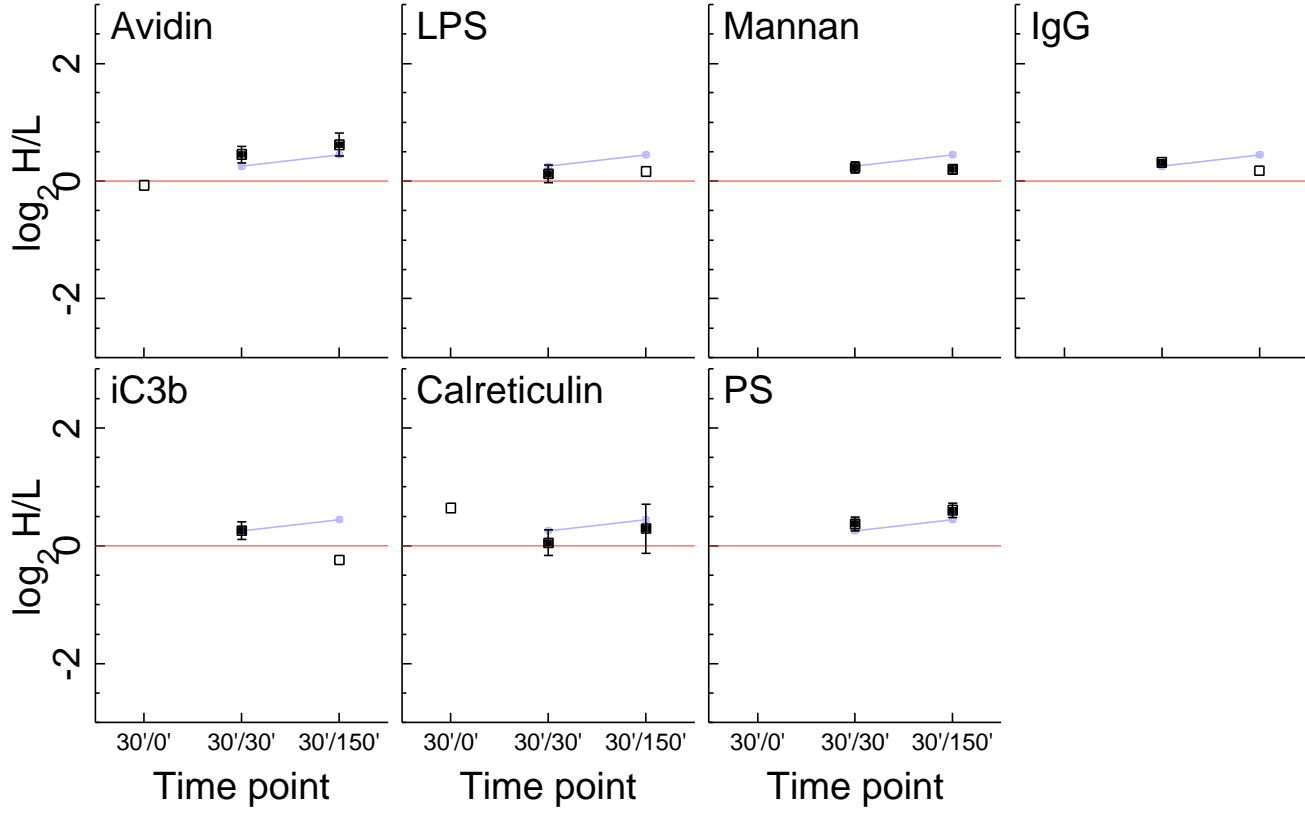



### alox5ap (P30355)

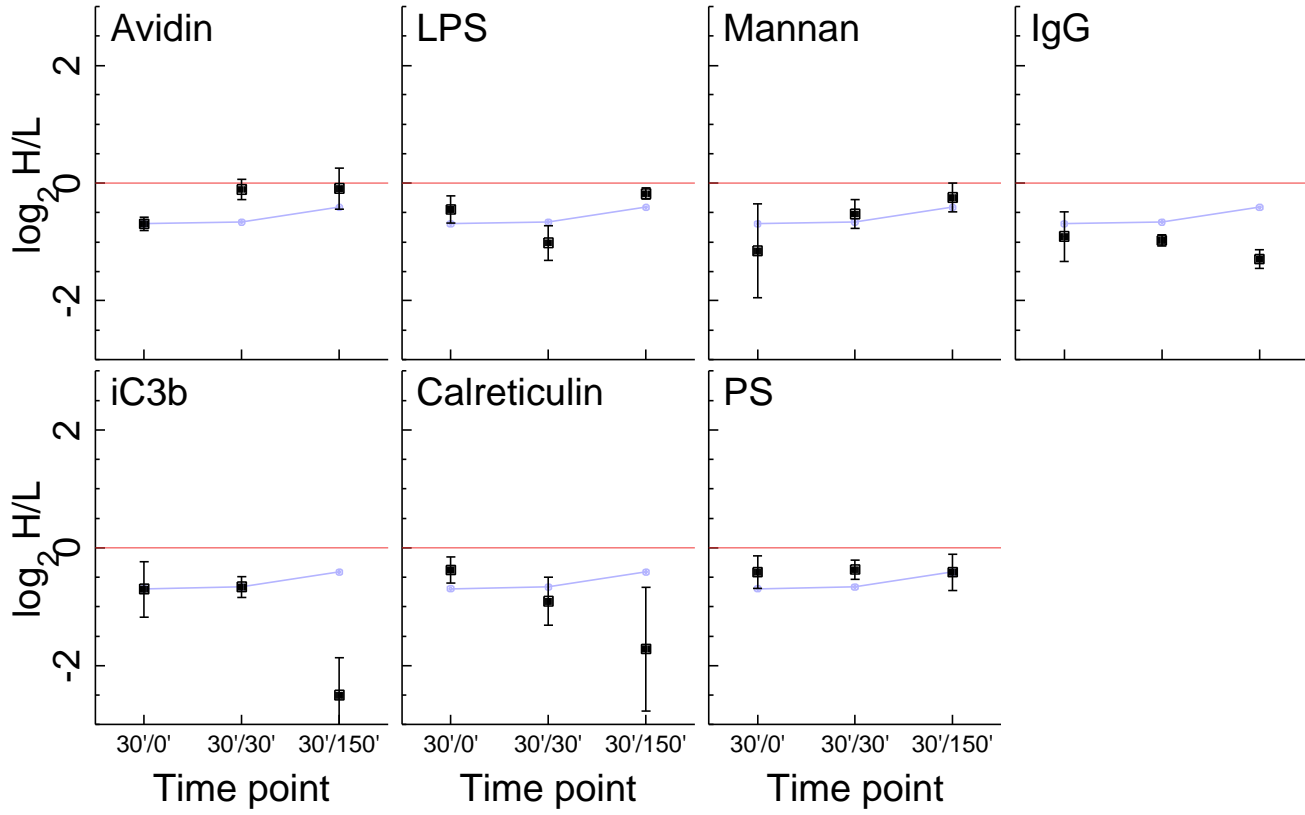

alox5 (P48999)

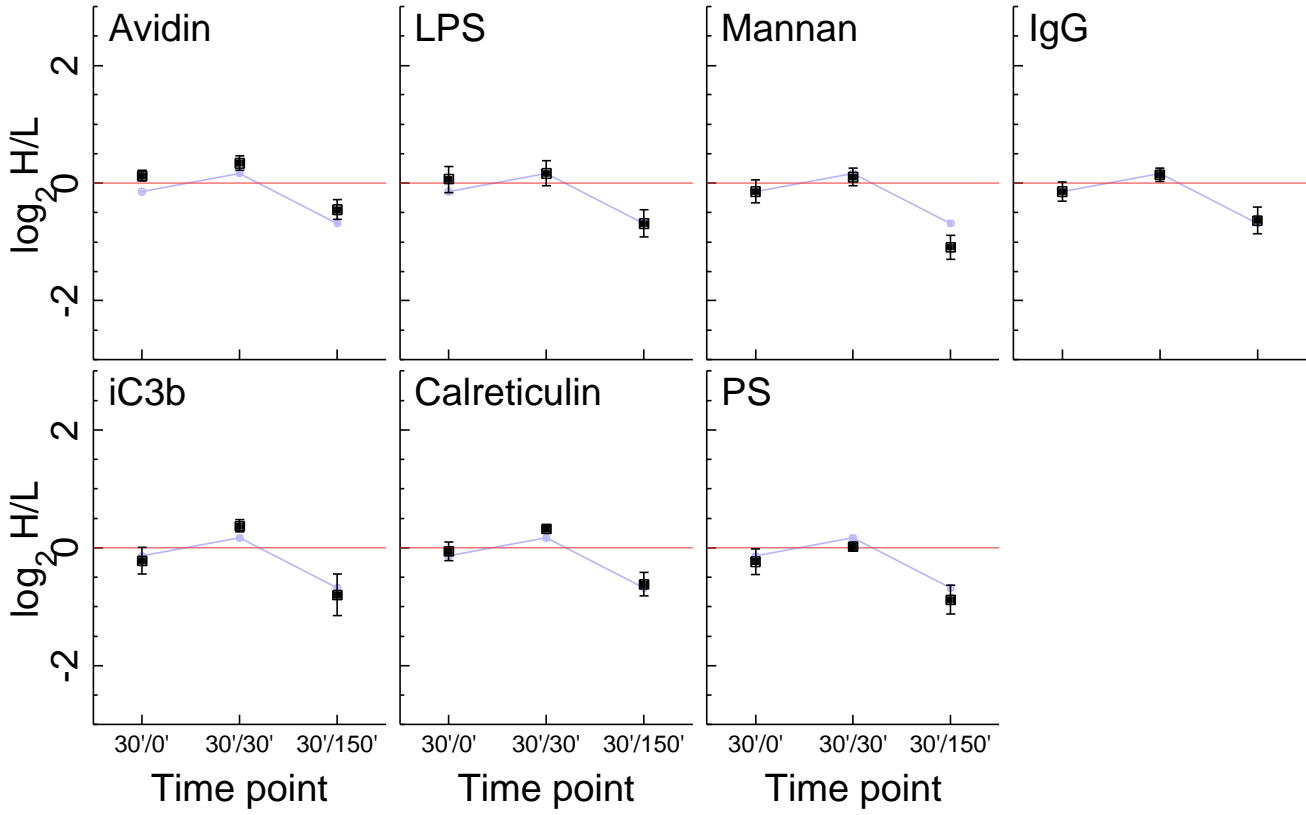

alyref (O08583)

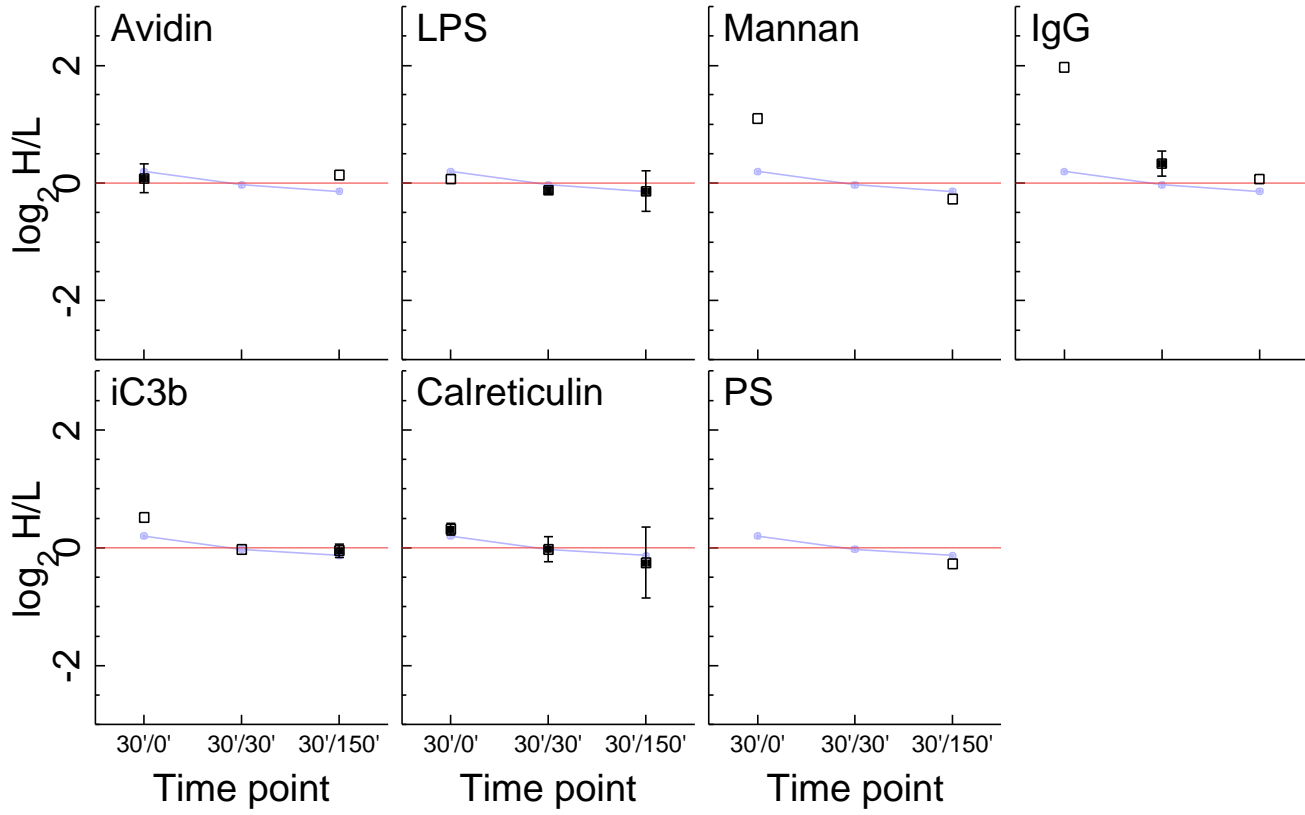

# ankfy1 (Q810B6)

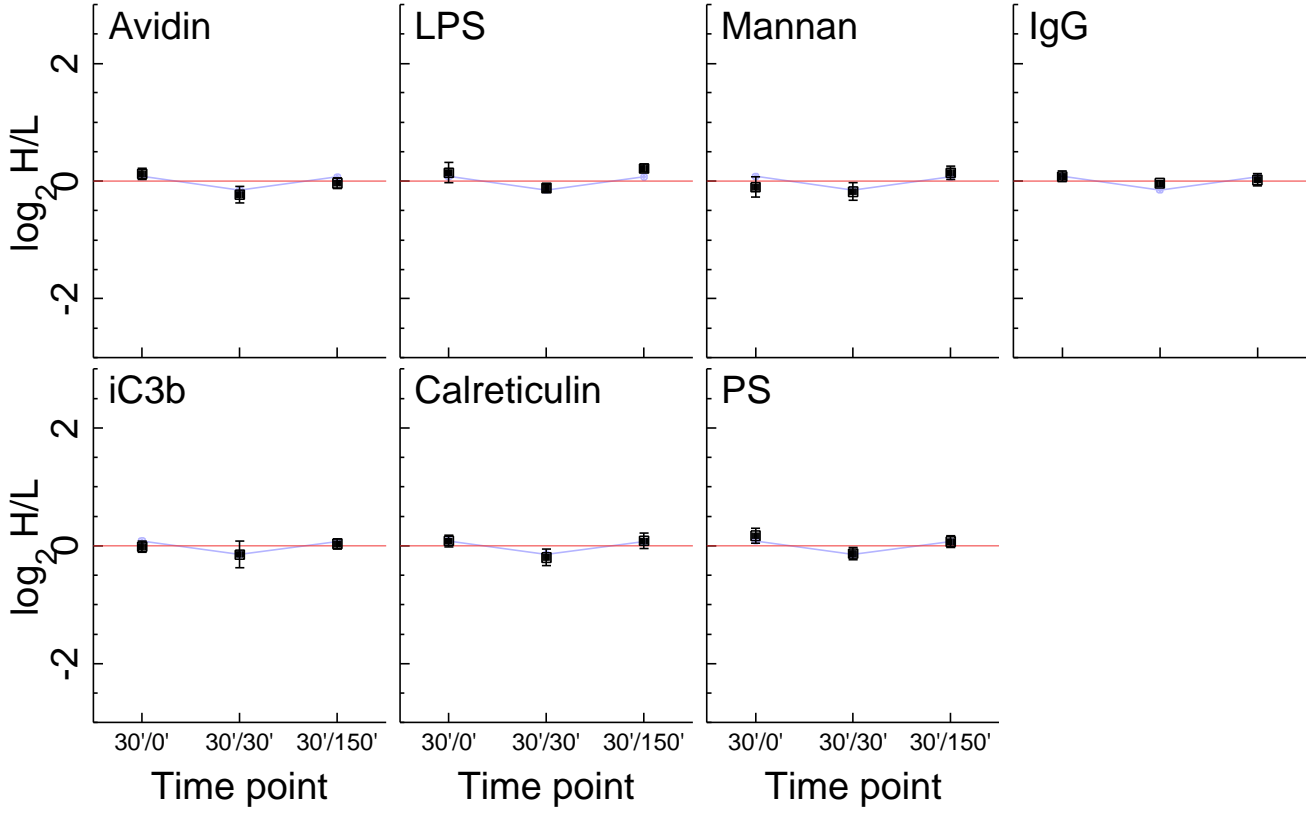

ankh (Q9JHZ2)

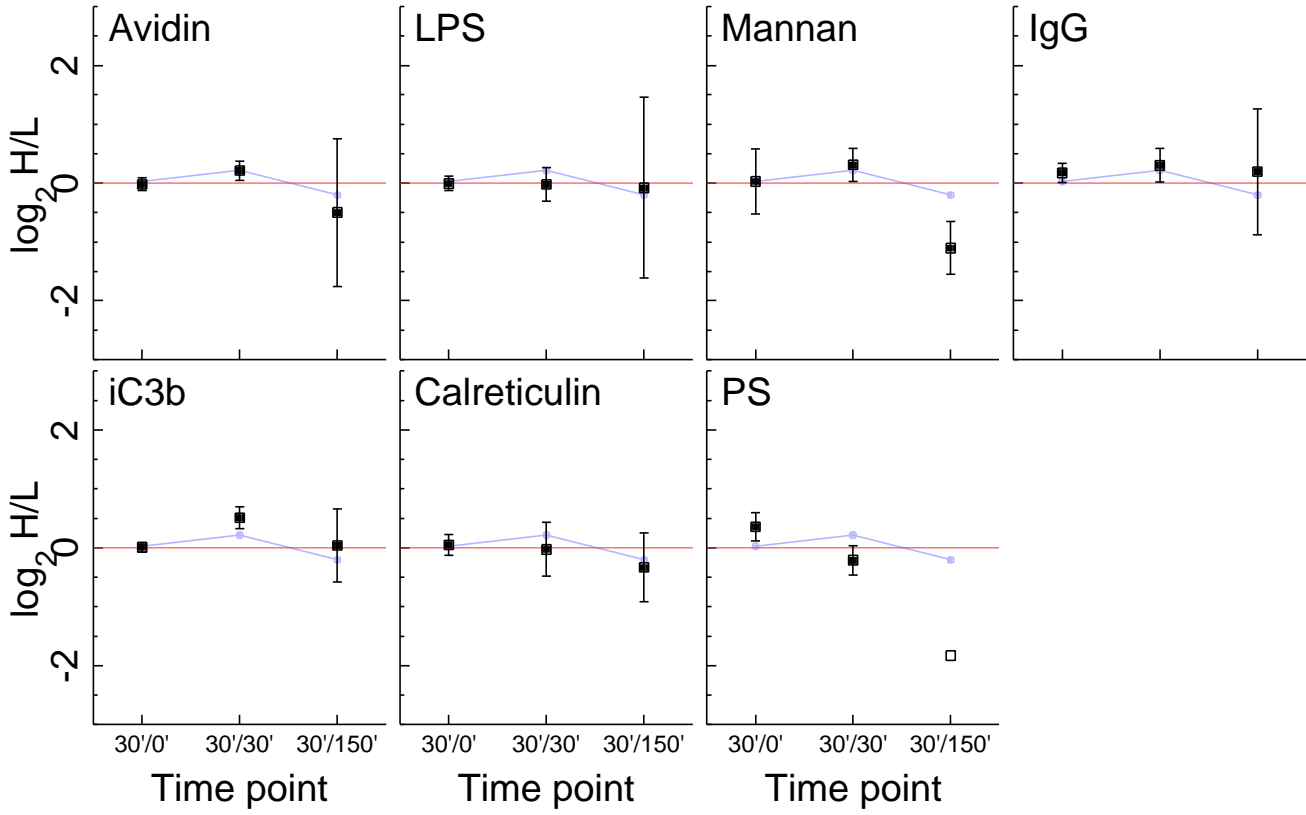

anIn (Q8K298)

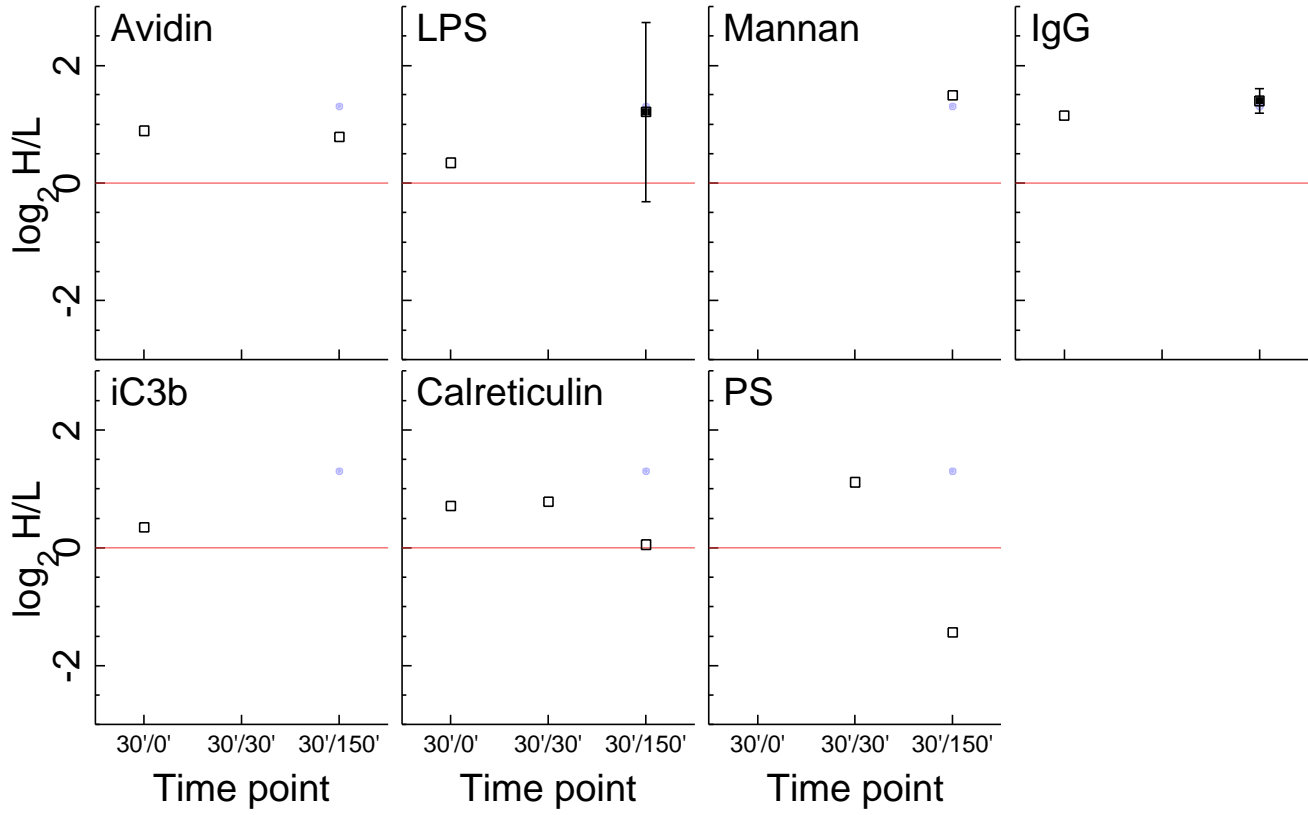

### ano6 (Q6P9J9)

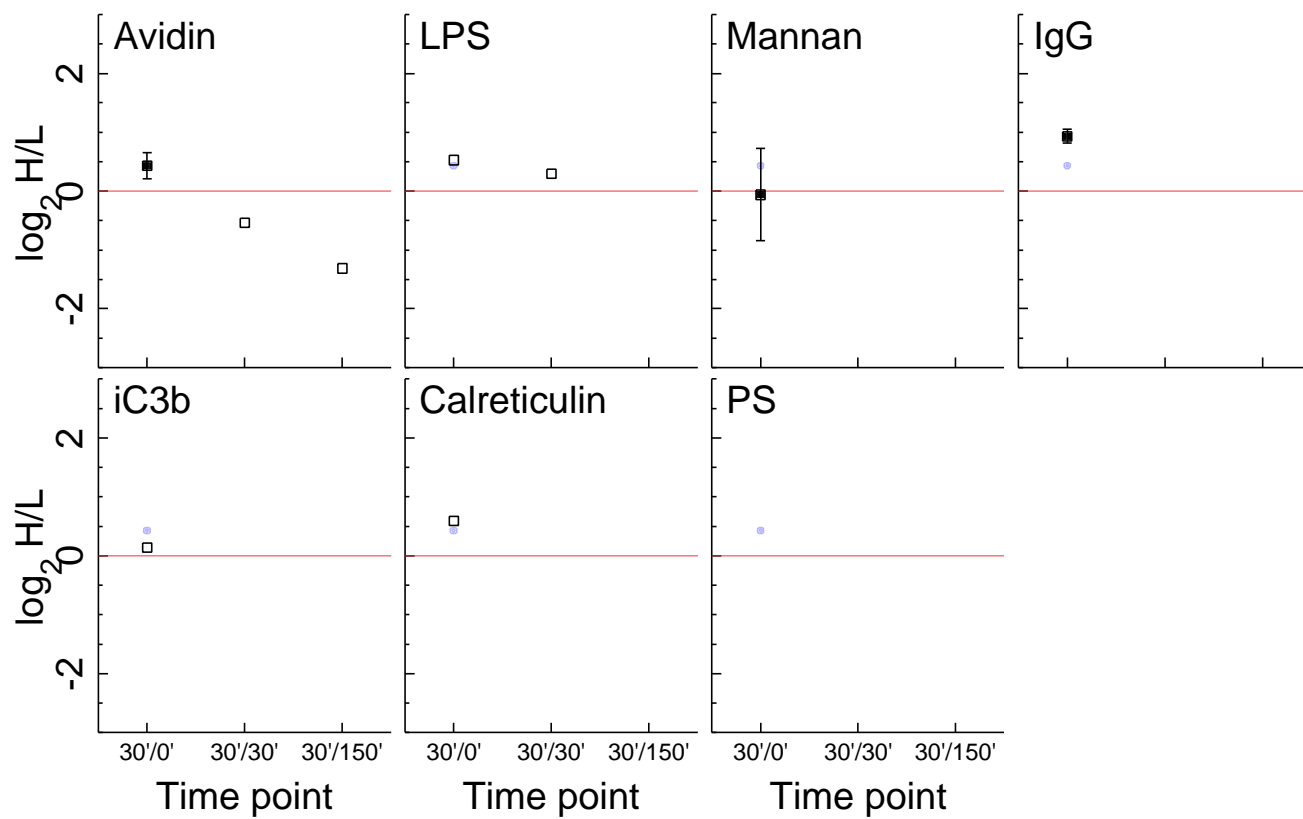

anp32b (Q9EST5)

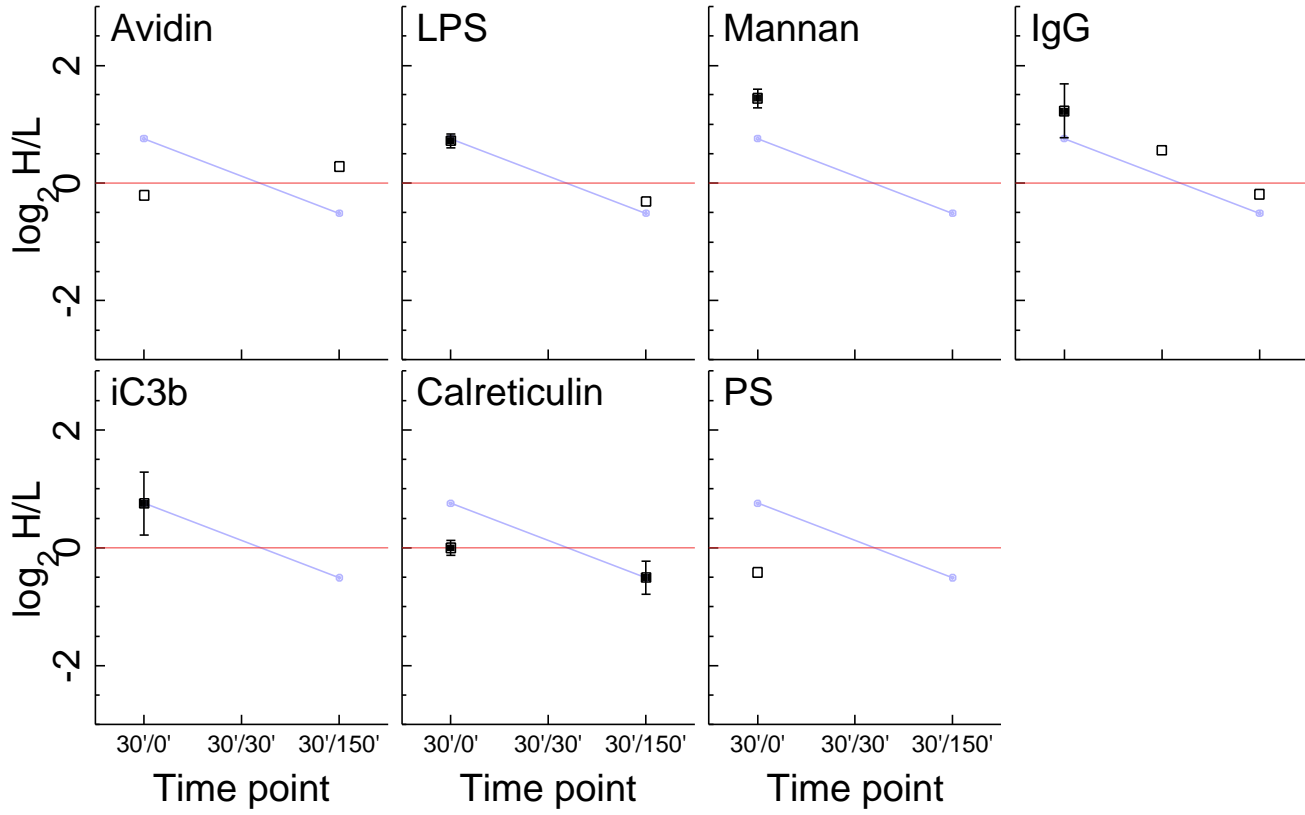



anpep (P97449)

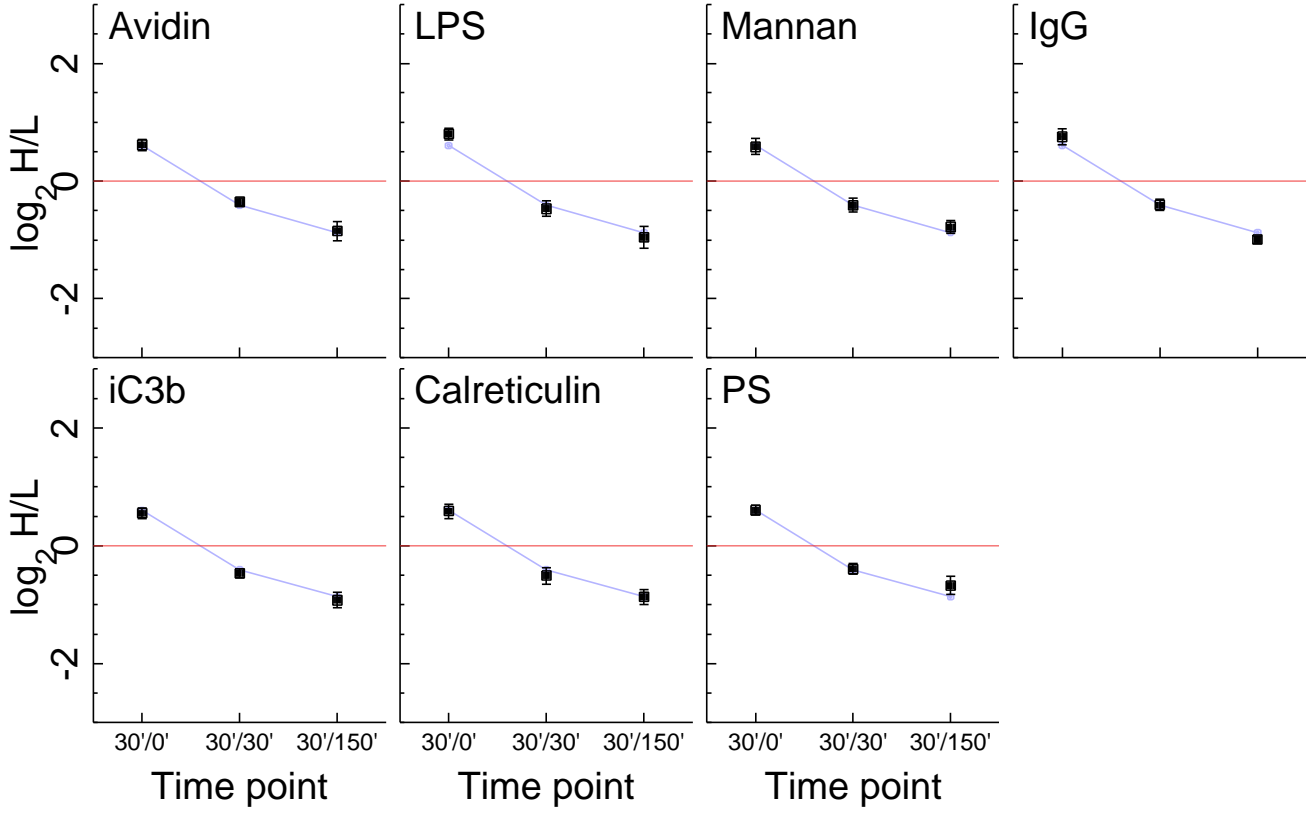

antxr2 (Q6DFX2)

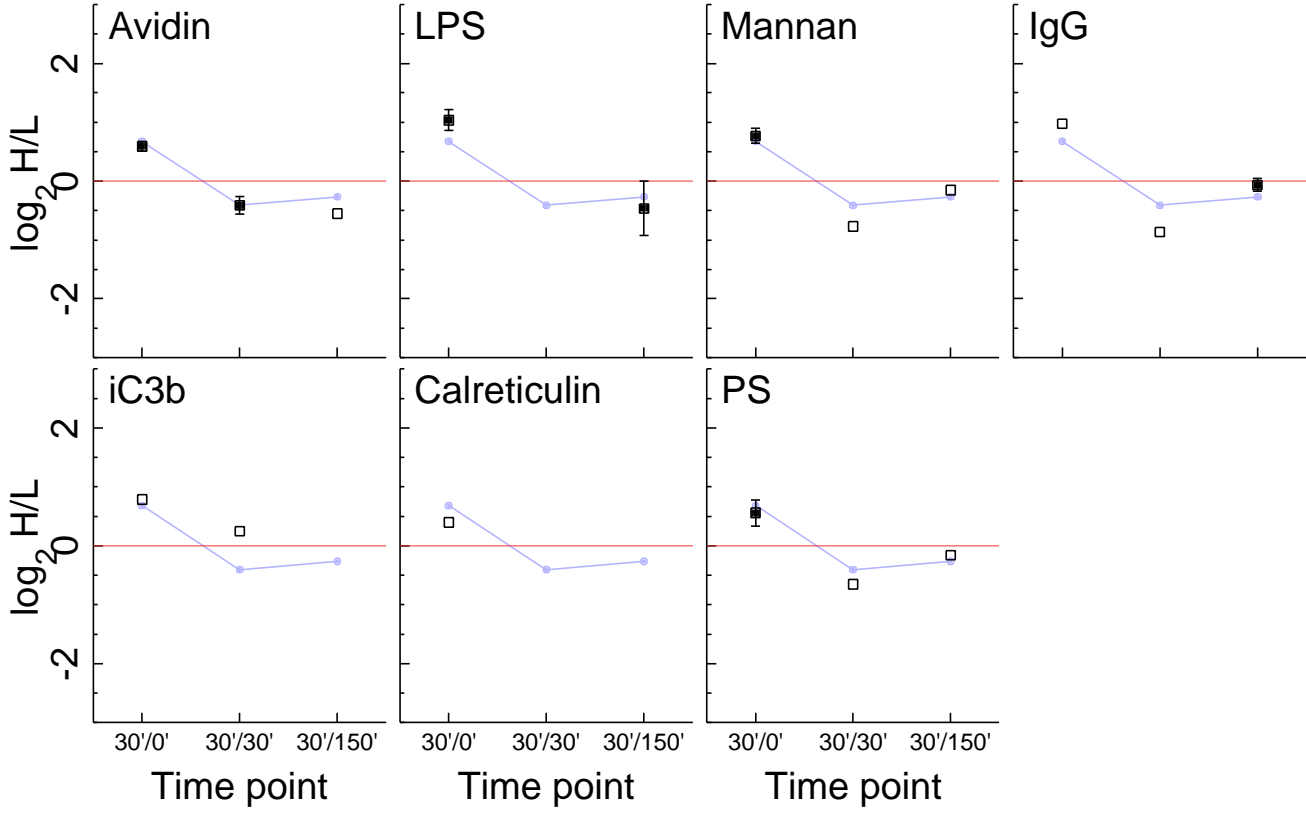

### anxa11 (P97384)

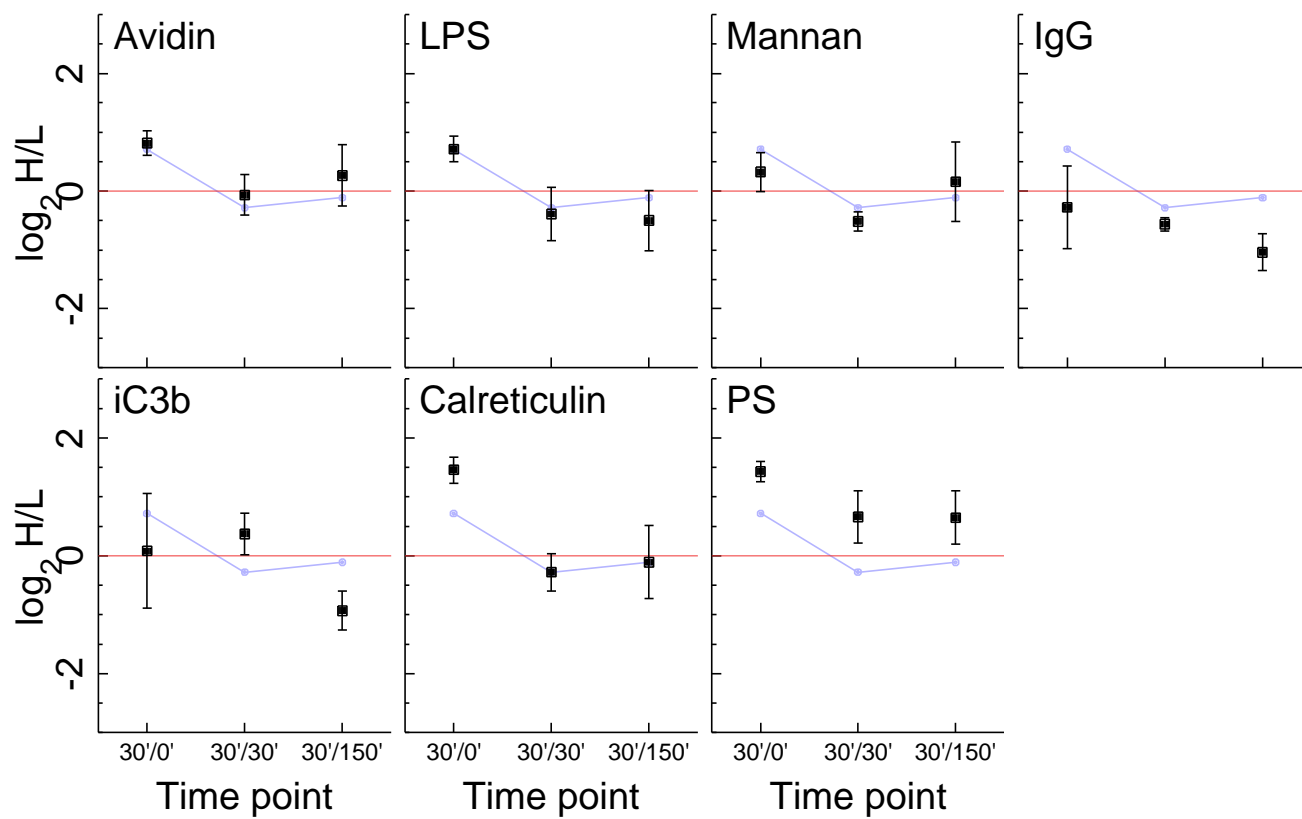

# anxa1 (P10107)

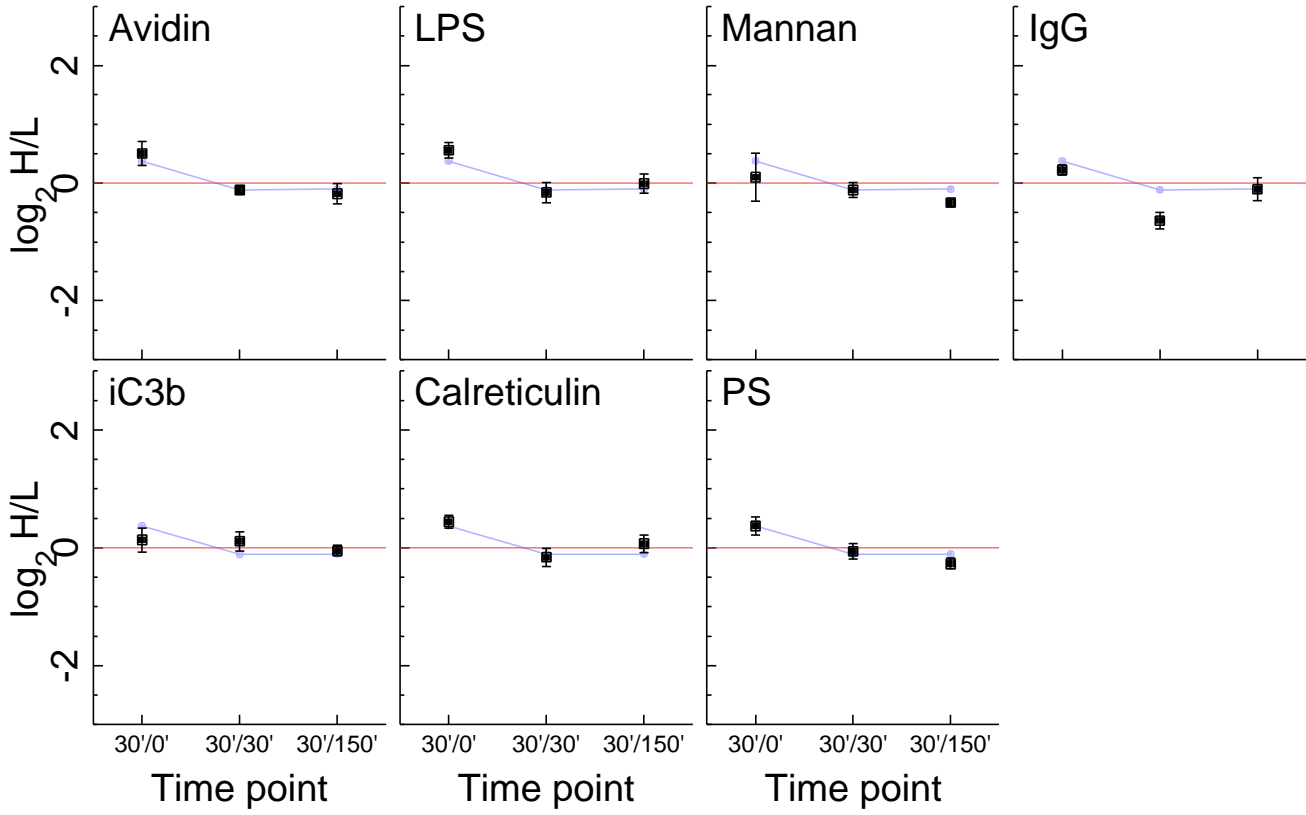

anxa2 (P07356)

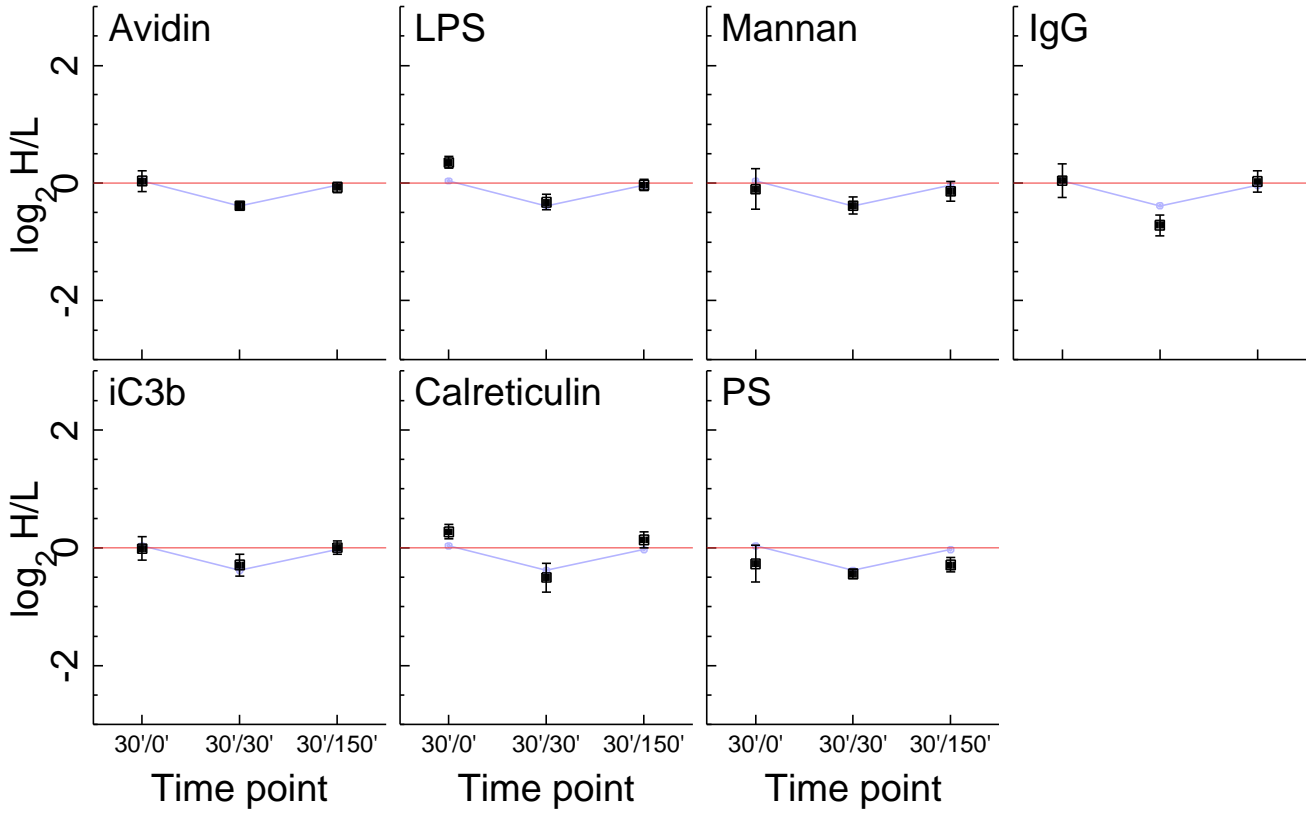

anxa3 (O35639)

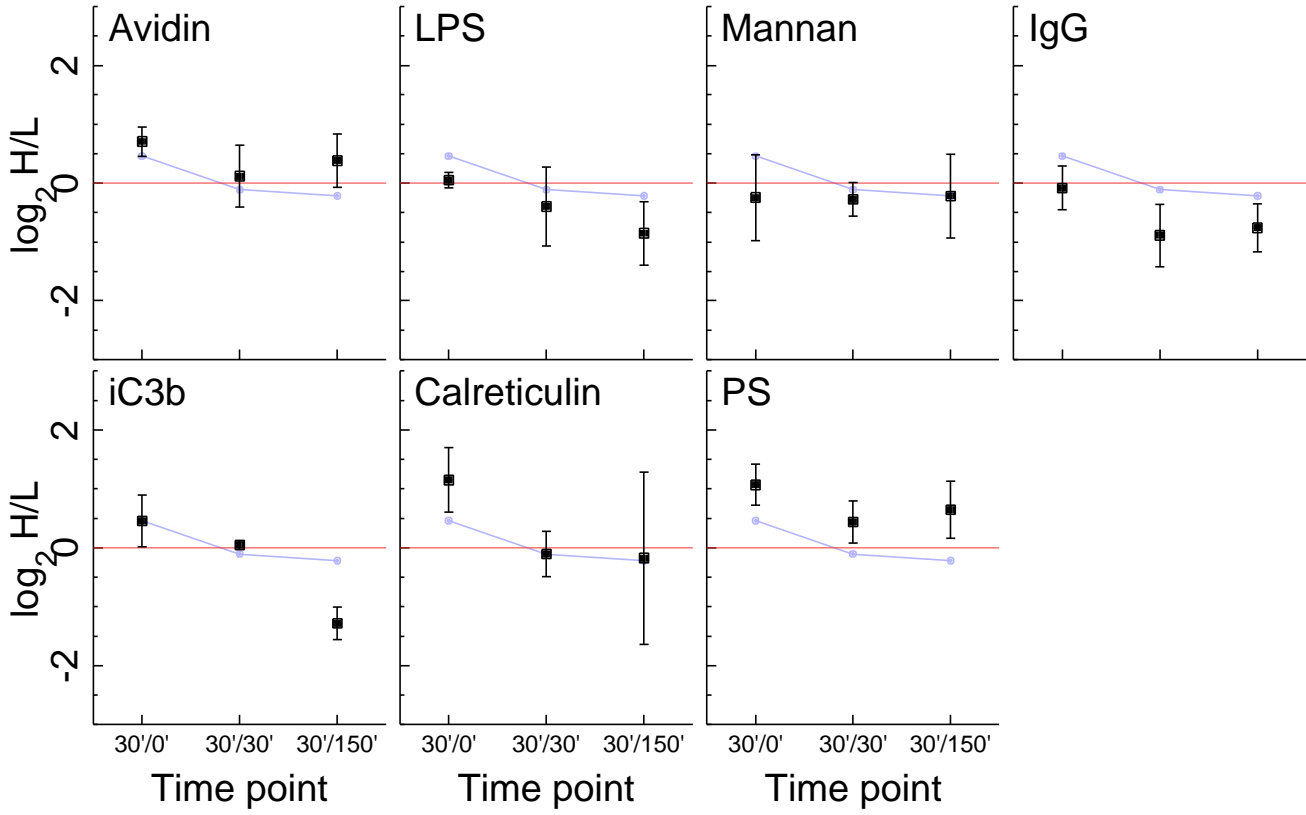

anxa4 (P97429)

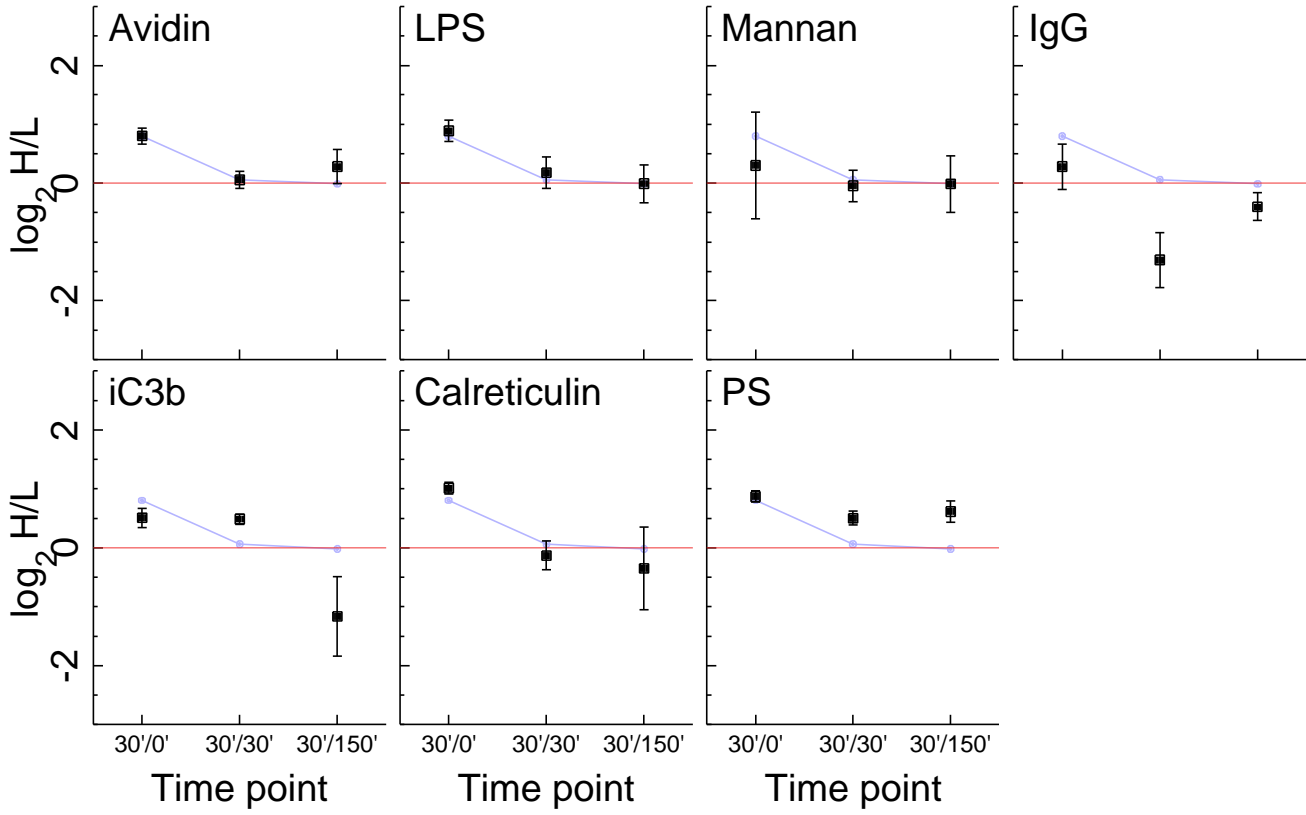

anxa5 (P48036)

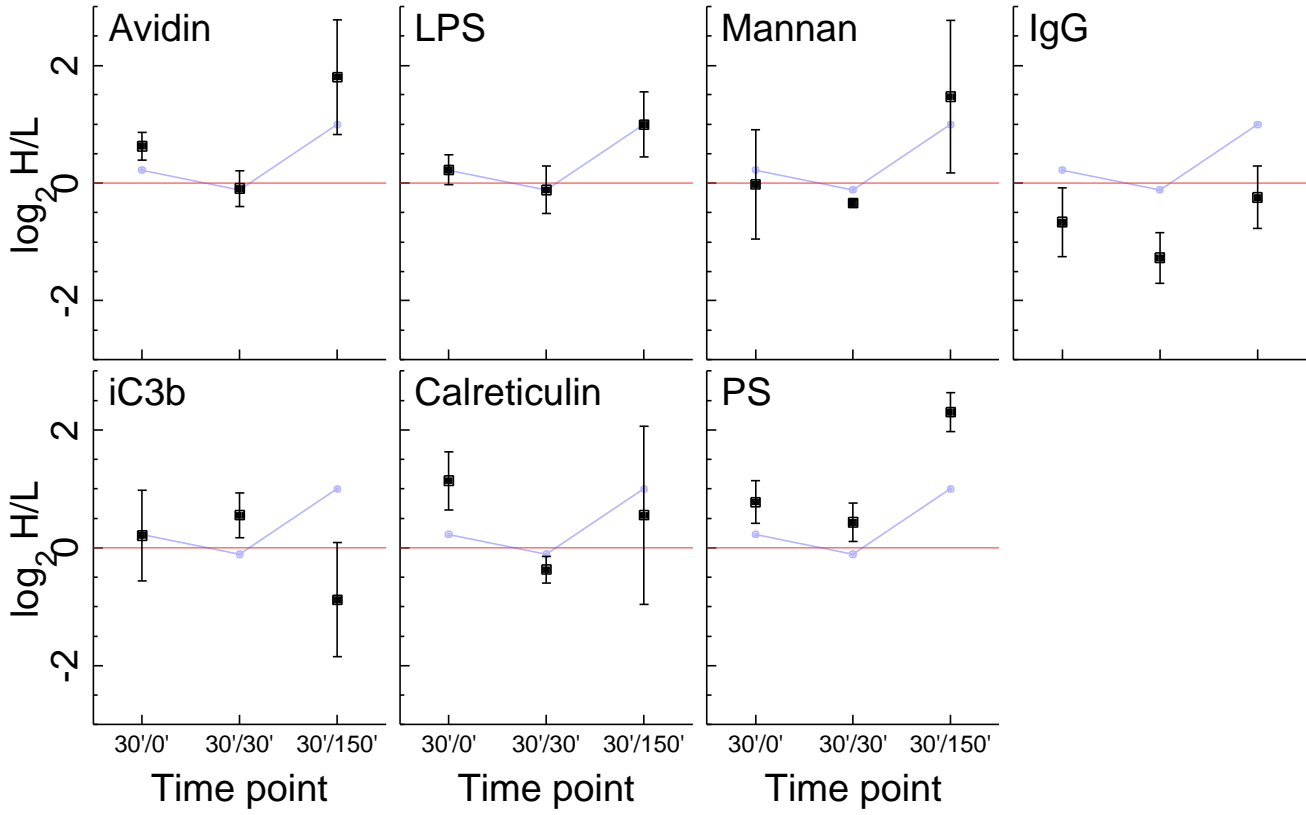



anxa6:1 (F8WIT2)

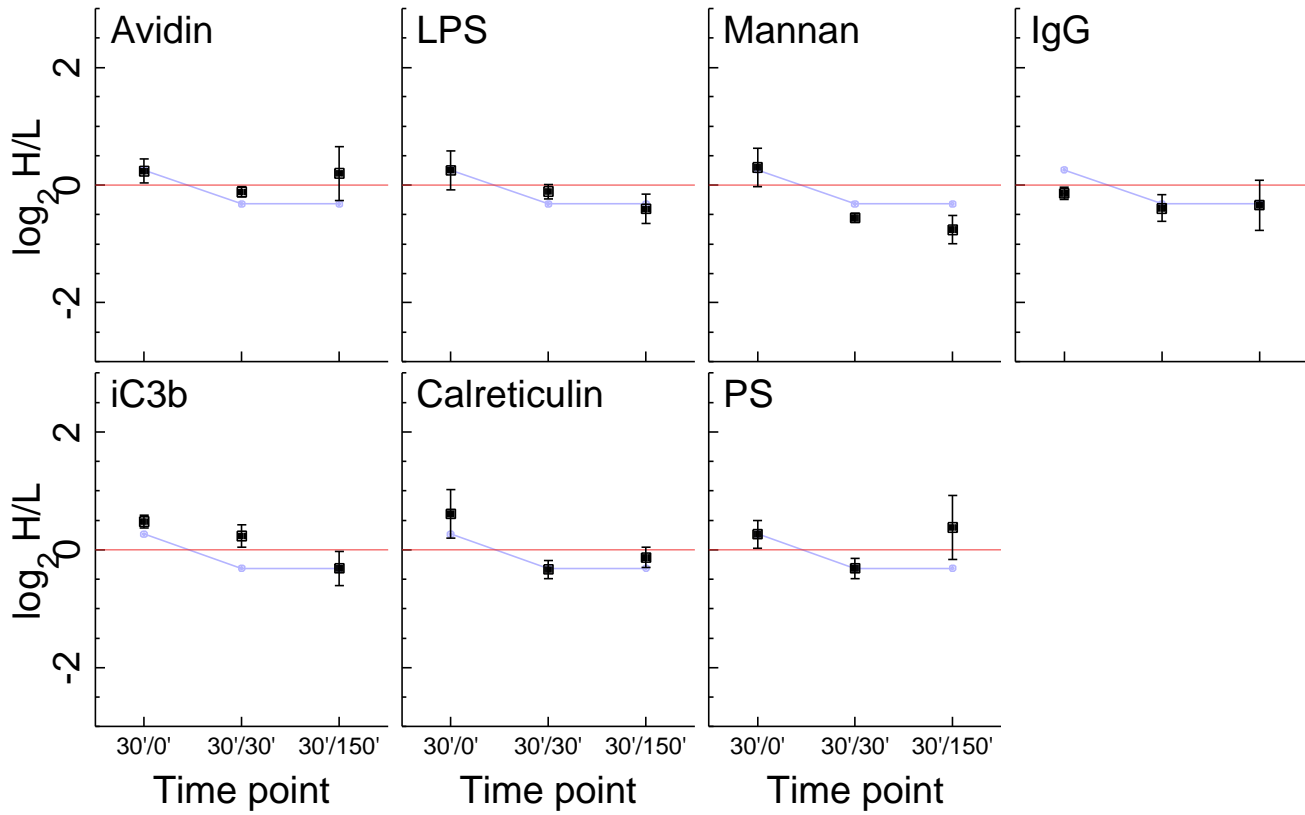

anxa6:2 (P14824)

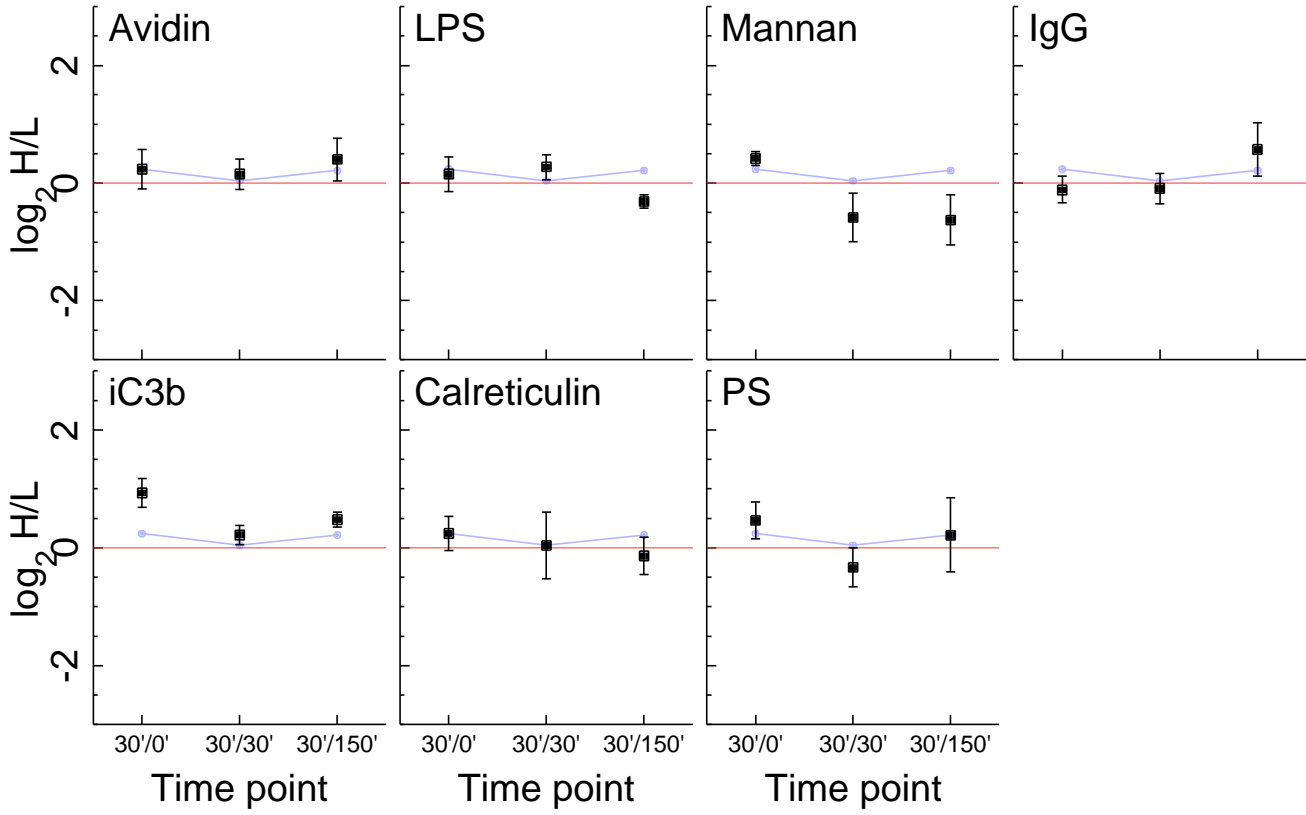

anxa7 (Q07076)

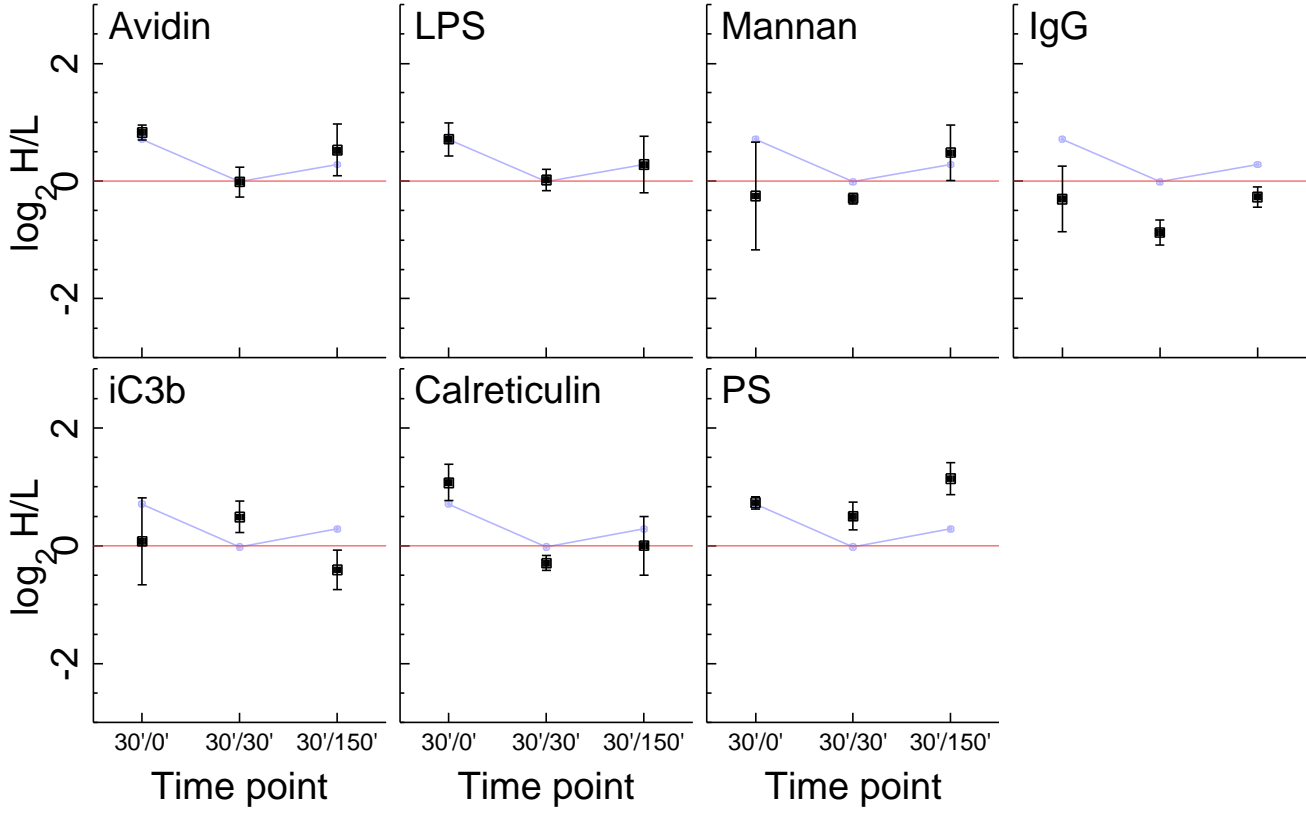

aoah (O35298)

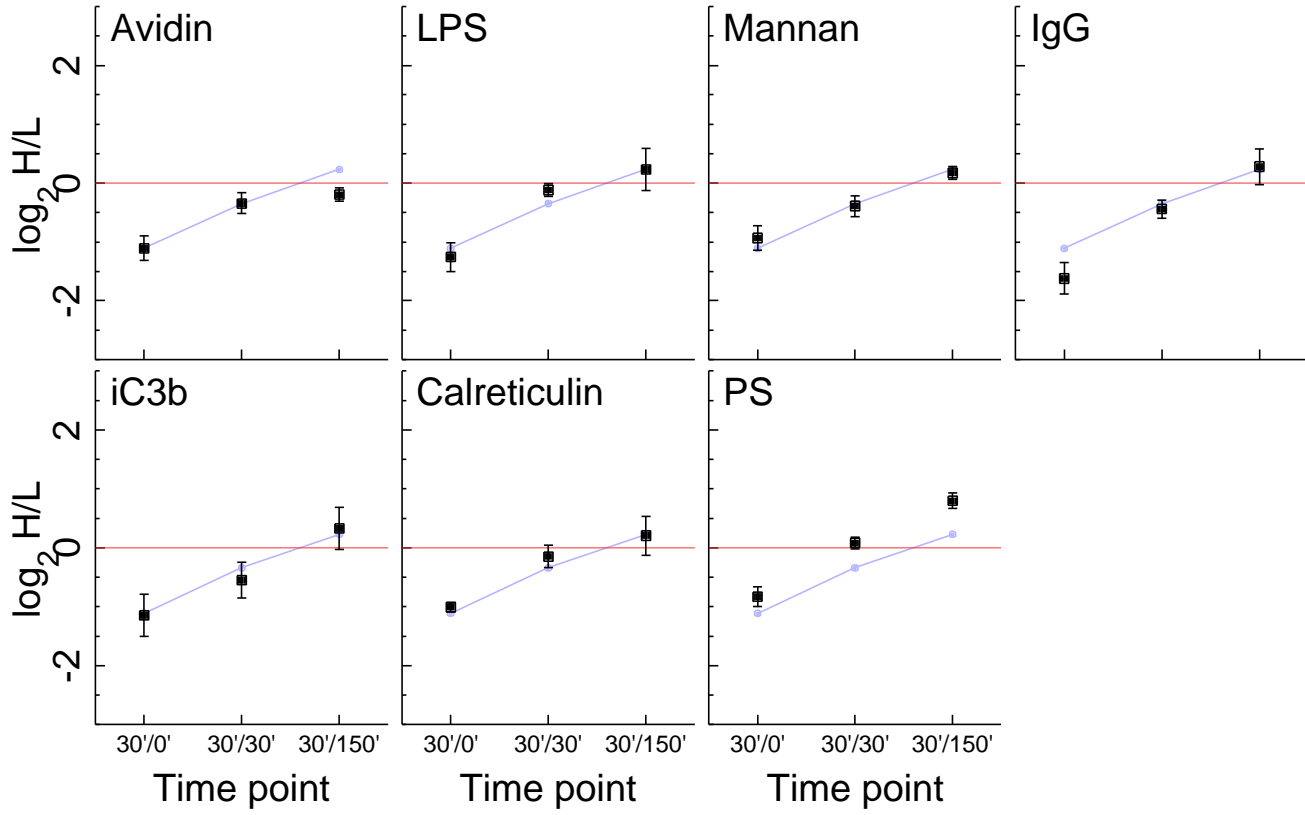

ap1b1 (O35643)

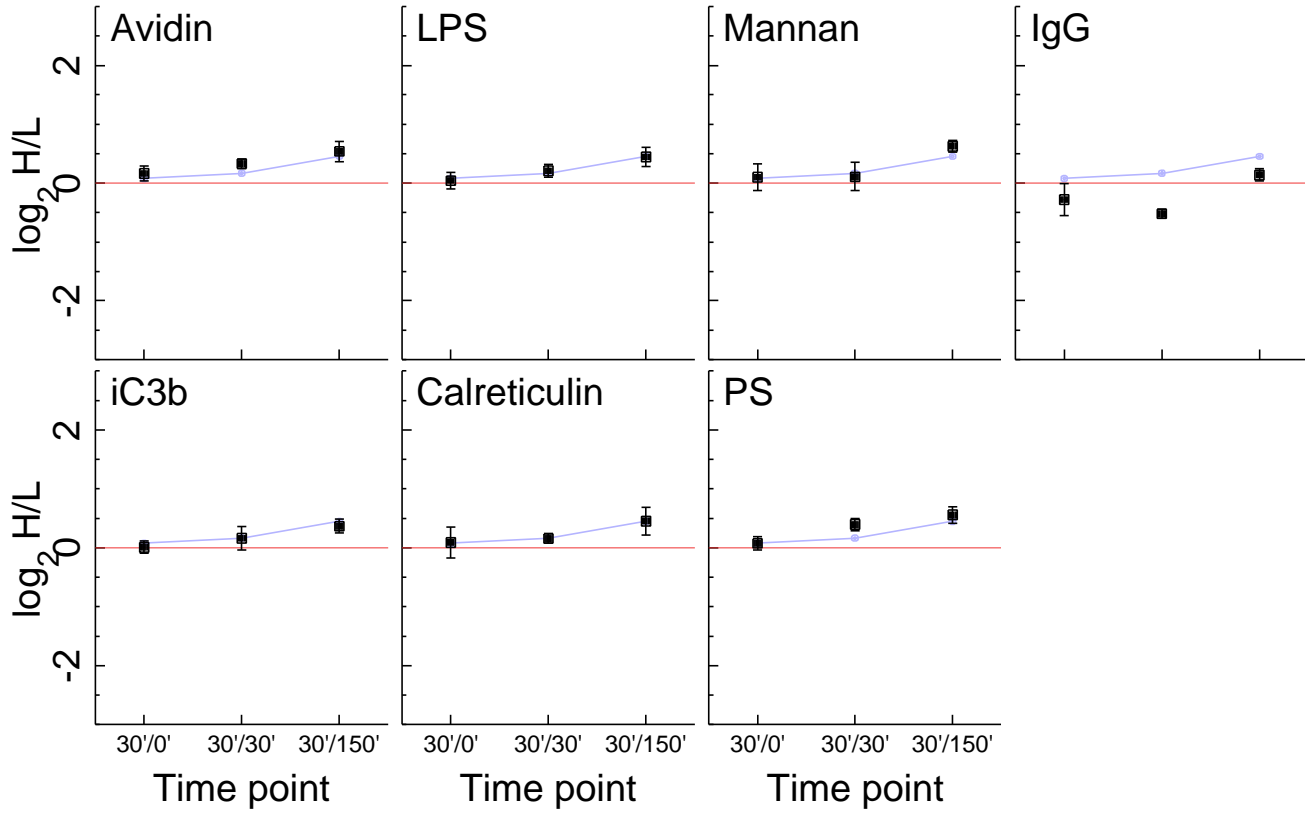

### ap1g1 (Q8CBB7)

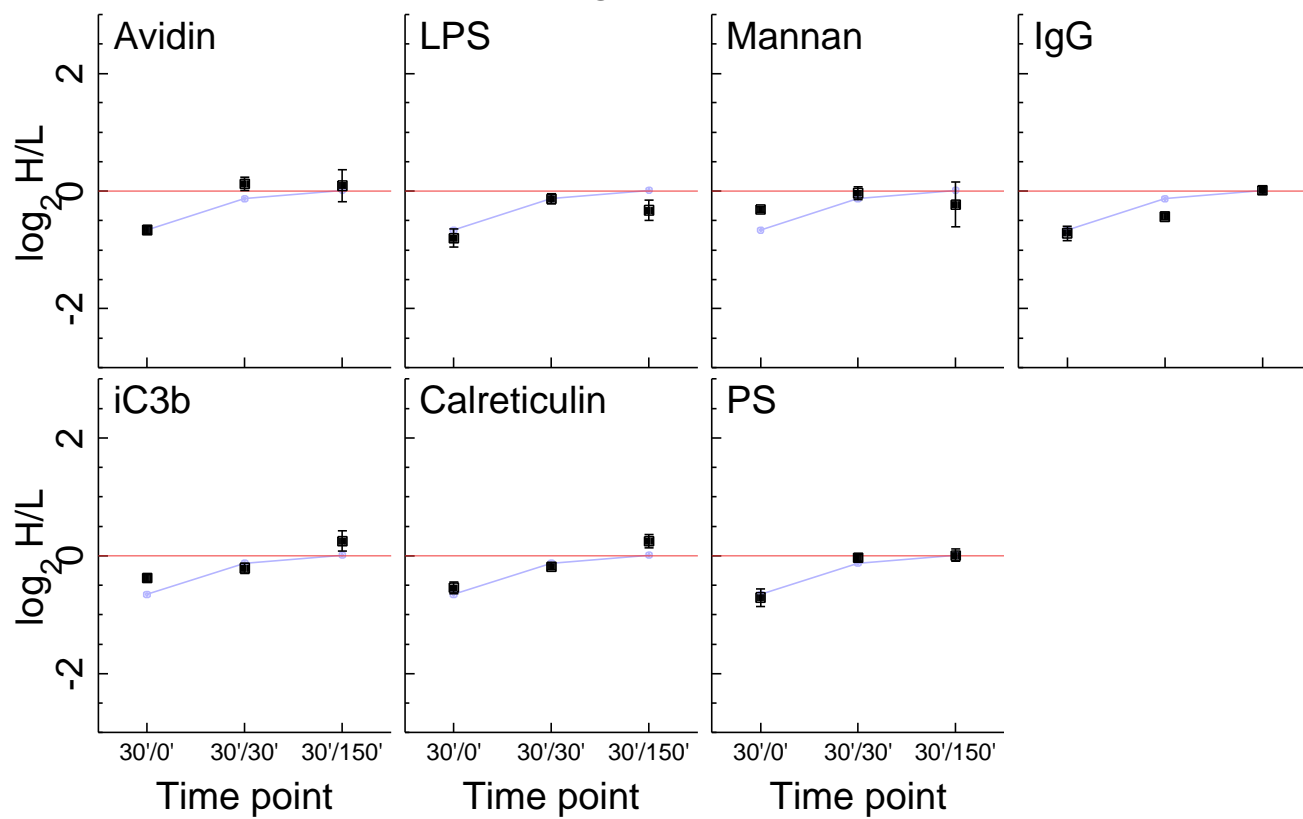

### ap1g2 (O88512)

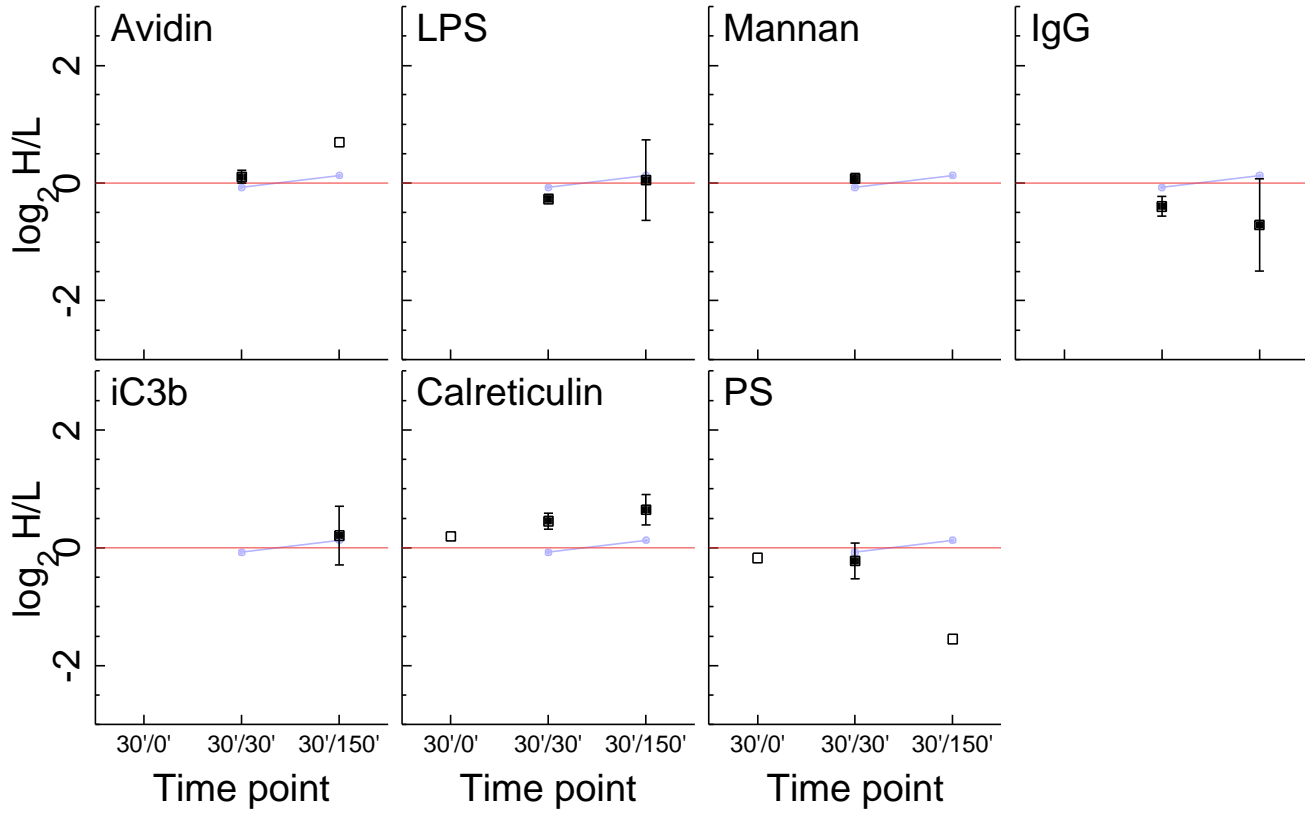

ap1m1 (P35585)

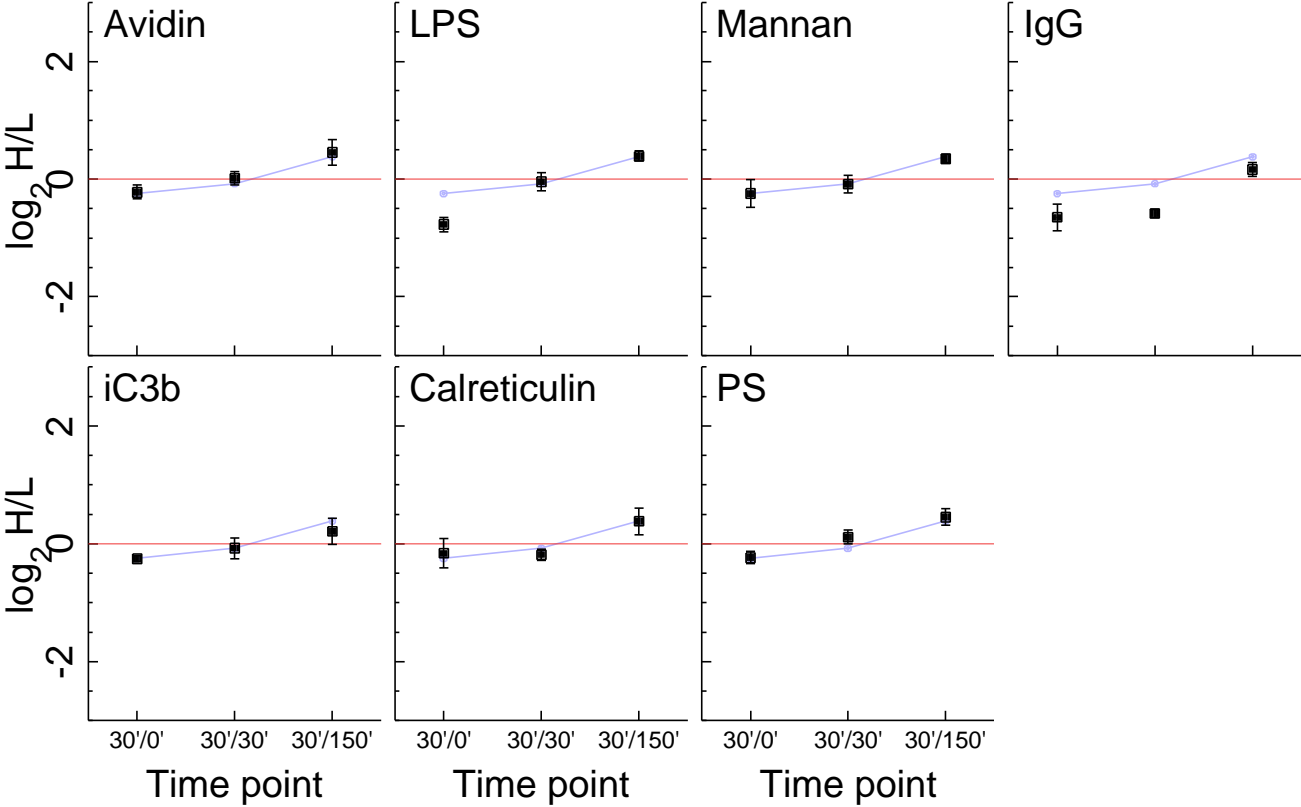



ap1s1 (P61967)

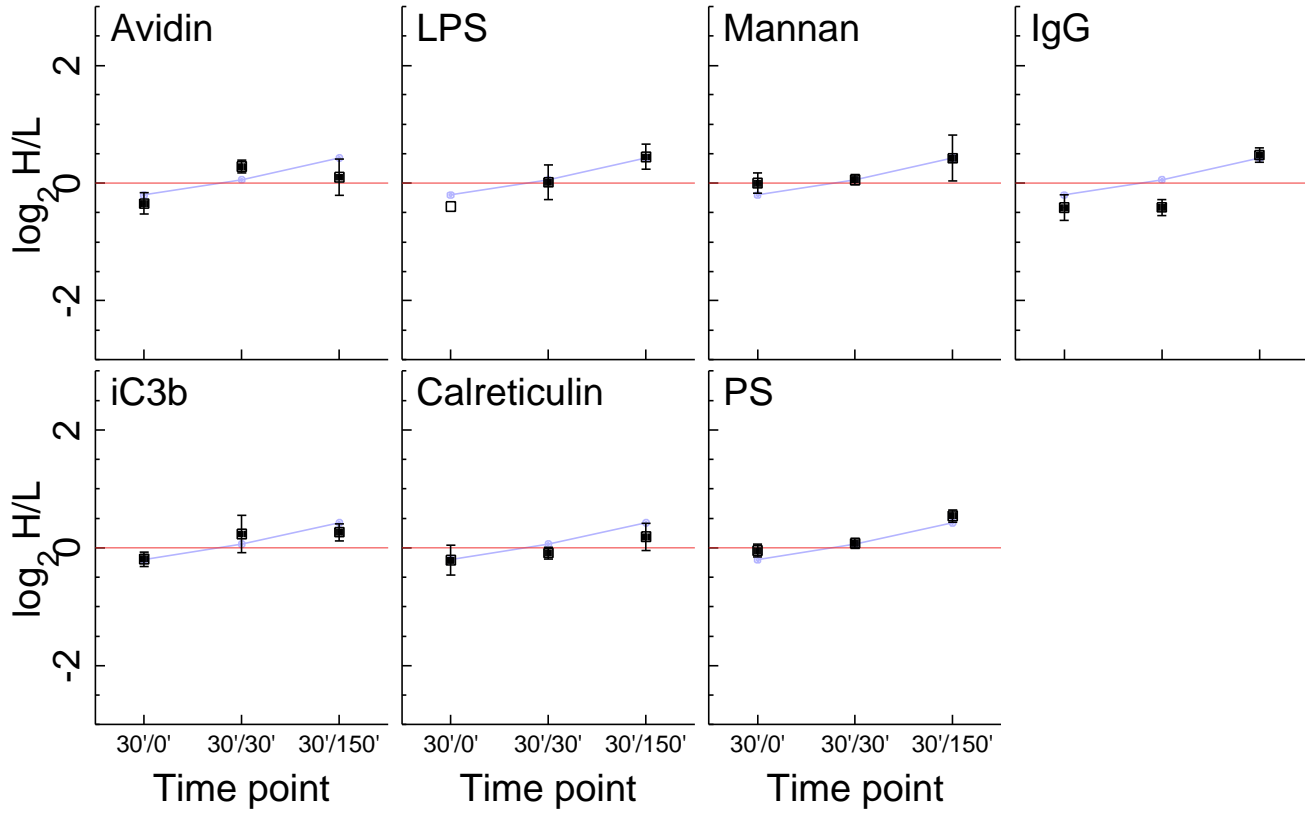

ap1s2 (Q3TIV9)

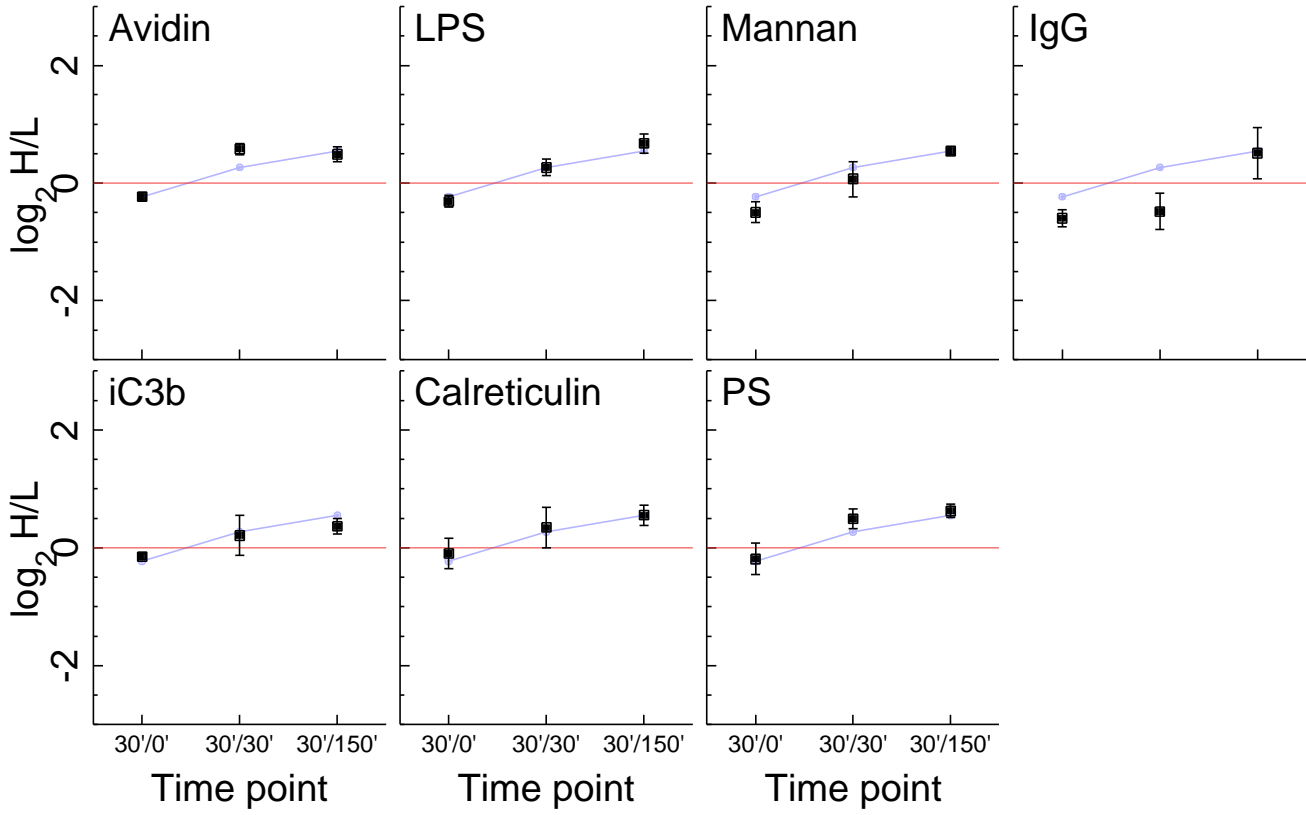

ap2a1 (P17426)

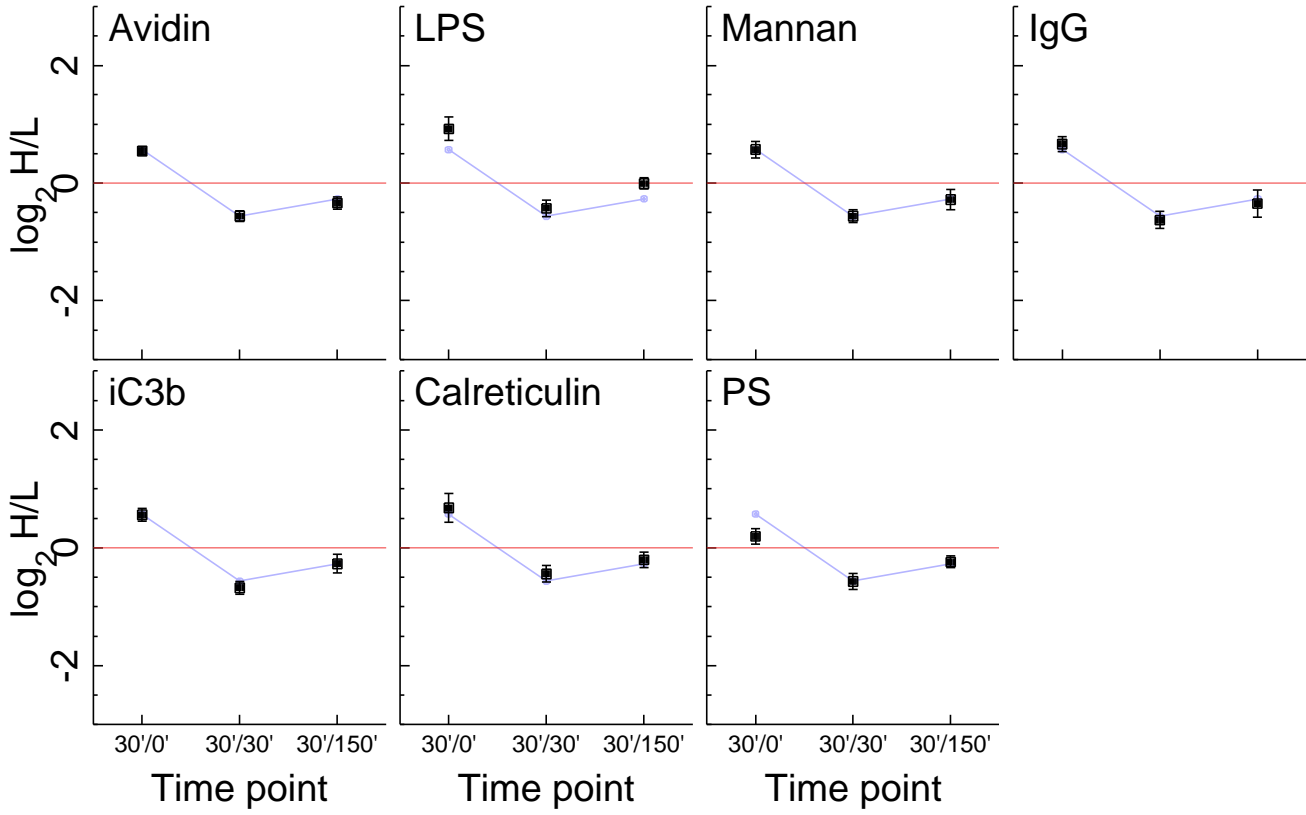

ap2a2 (P17427)

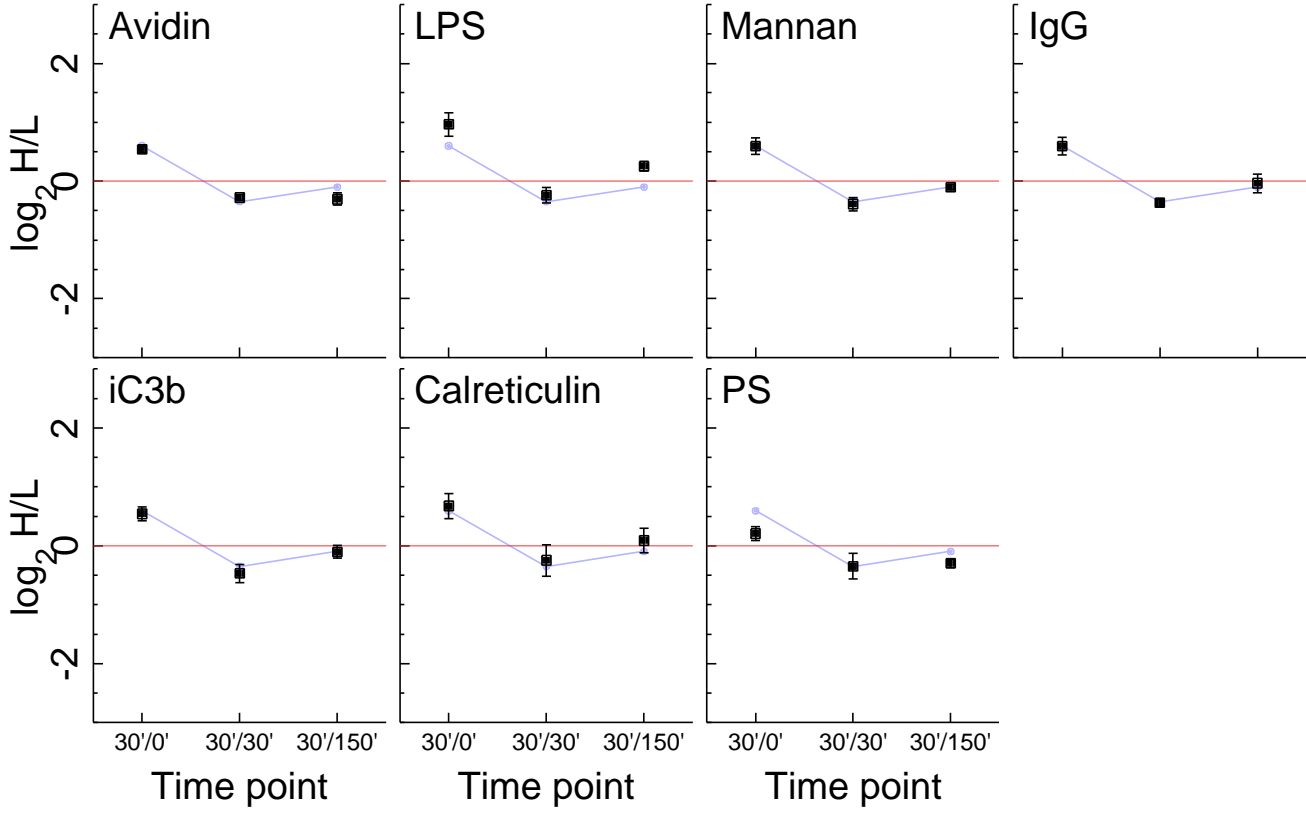

ap2b1 (Q9DBG3)

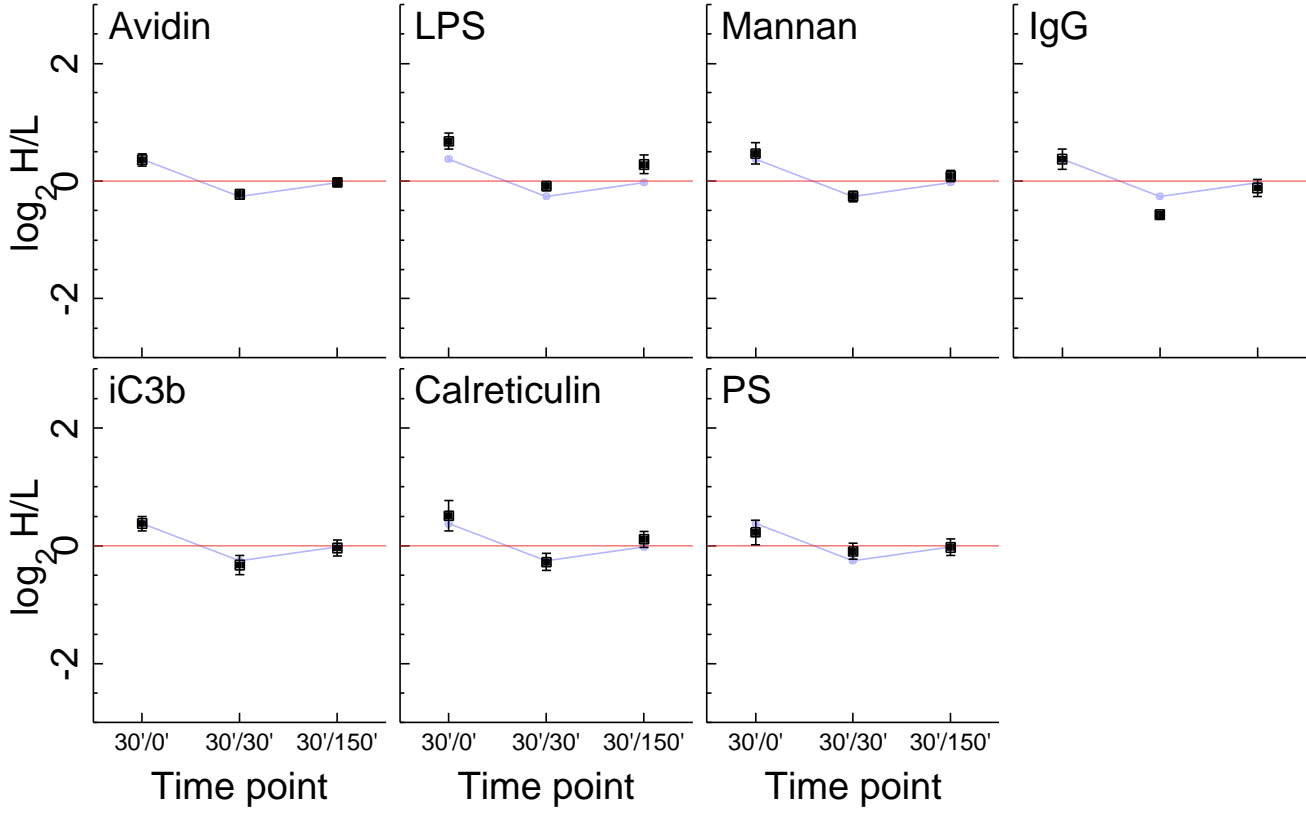

### ap2m1 (Q3TWWV4)

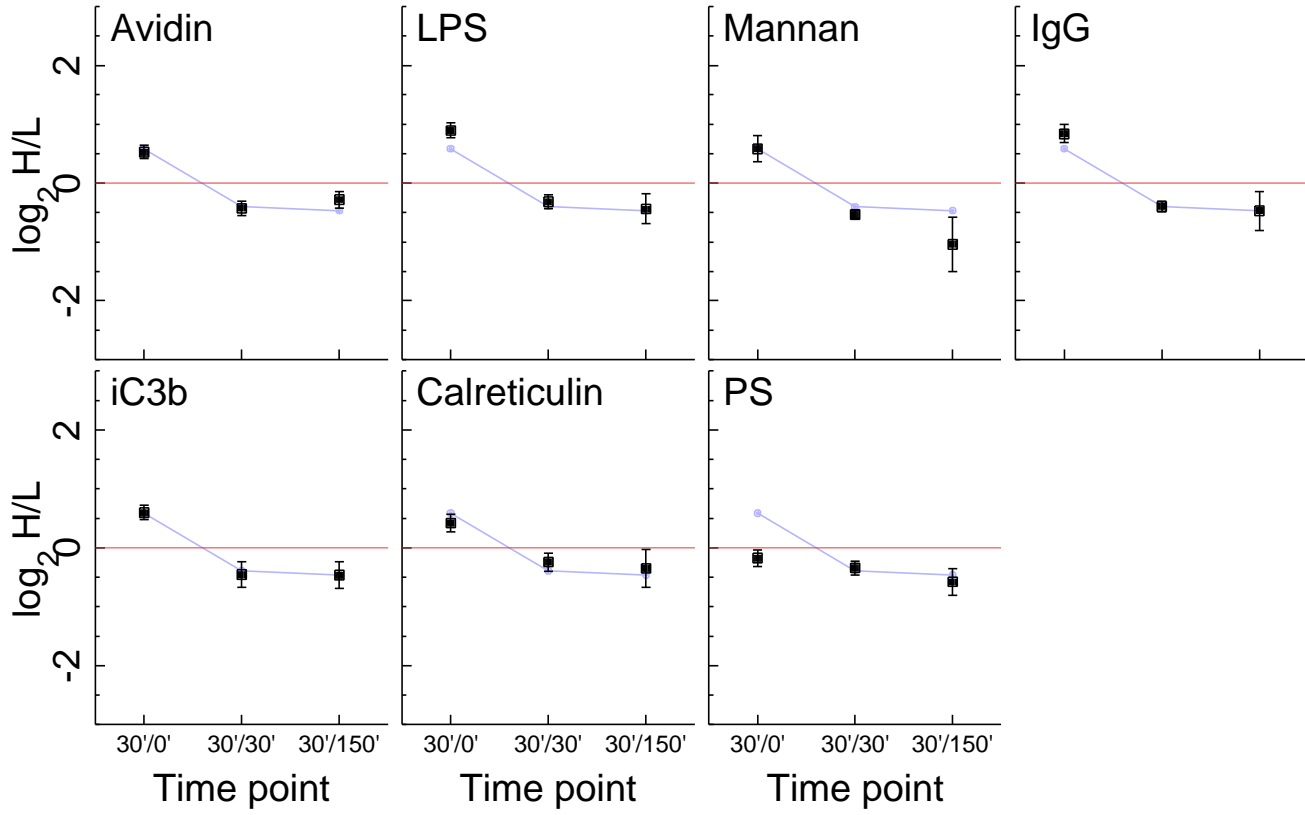

ap2s1 (P62743)

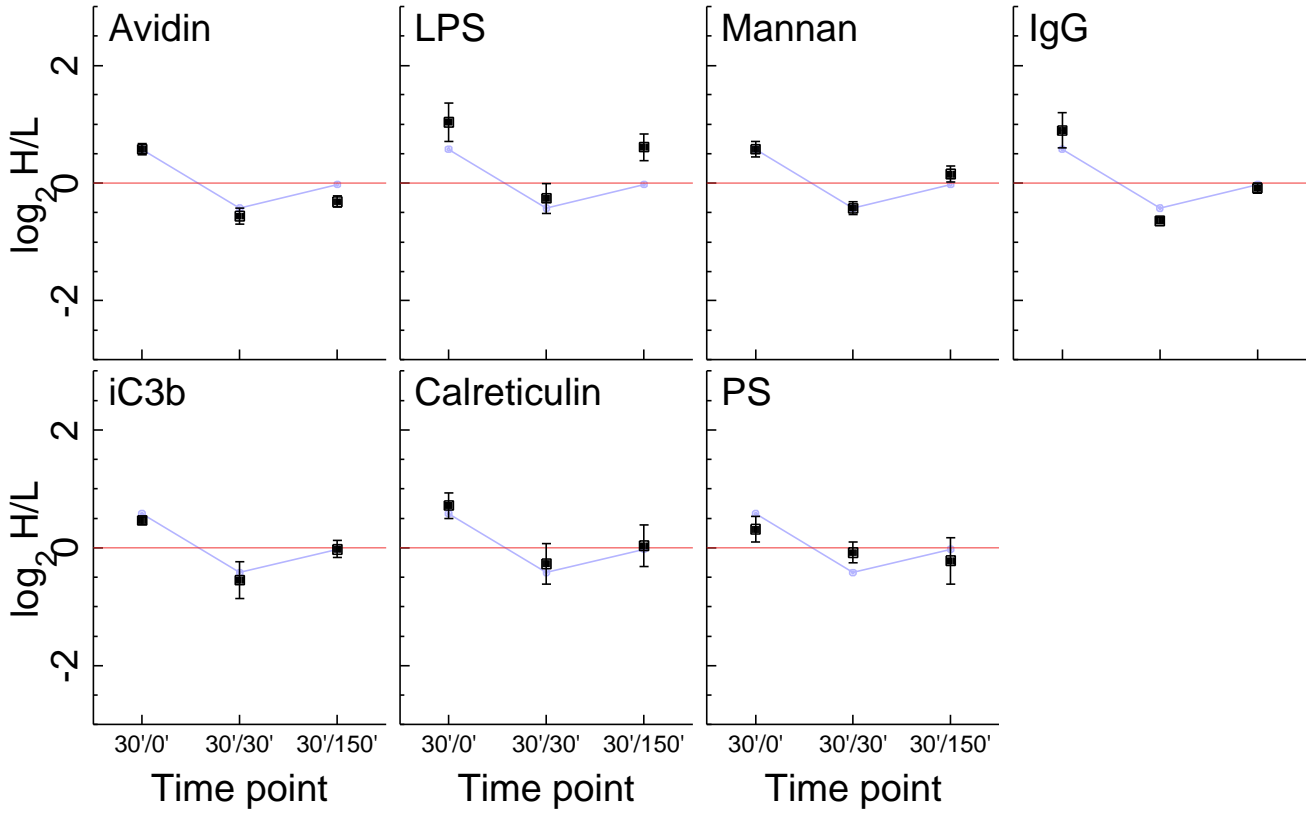

### ap3b1 (Q9Z1T1)

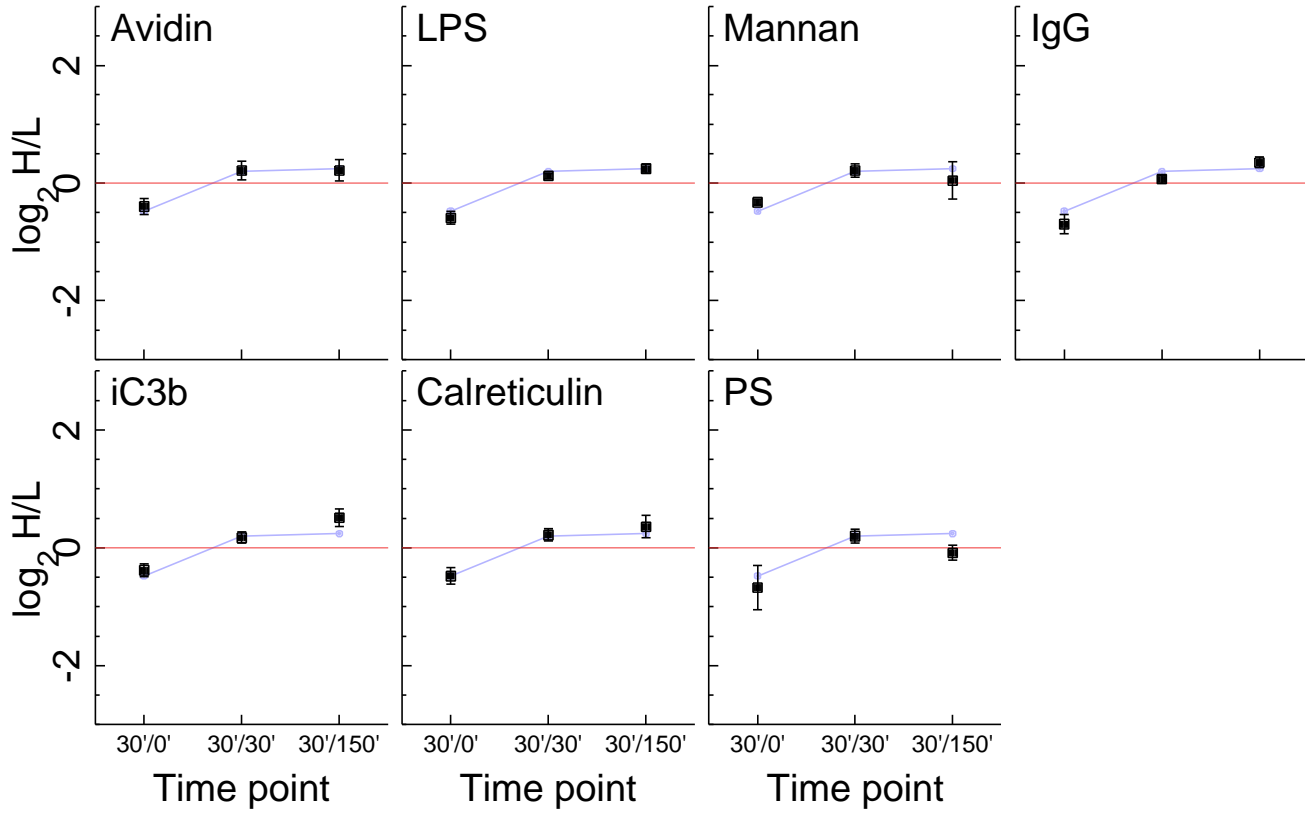



ap3d1 (O54774)

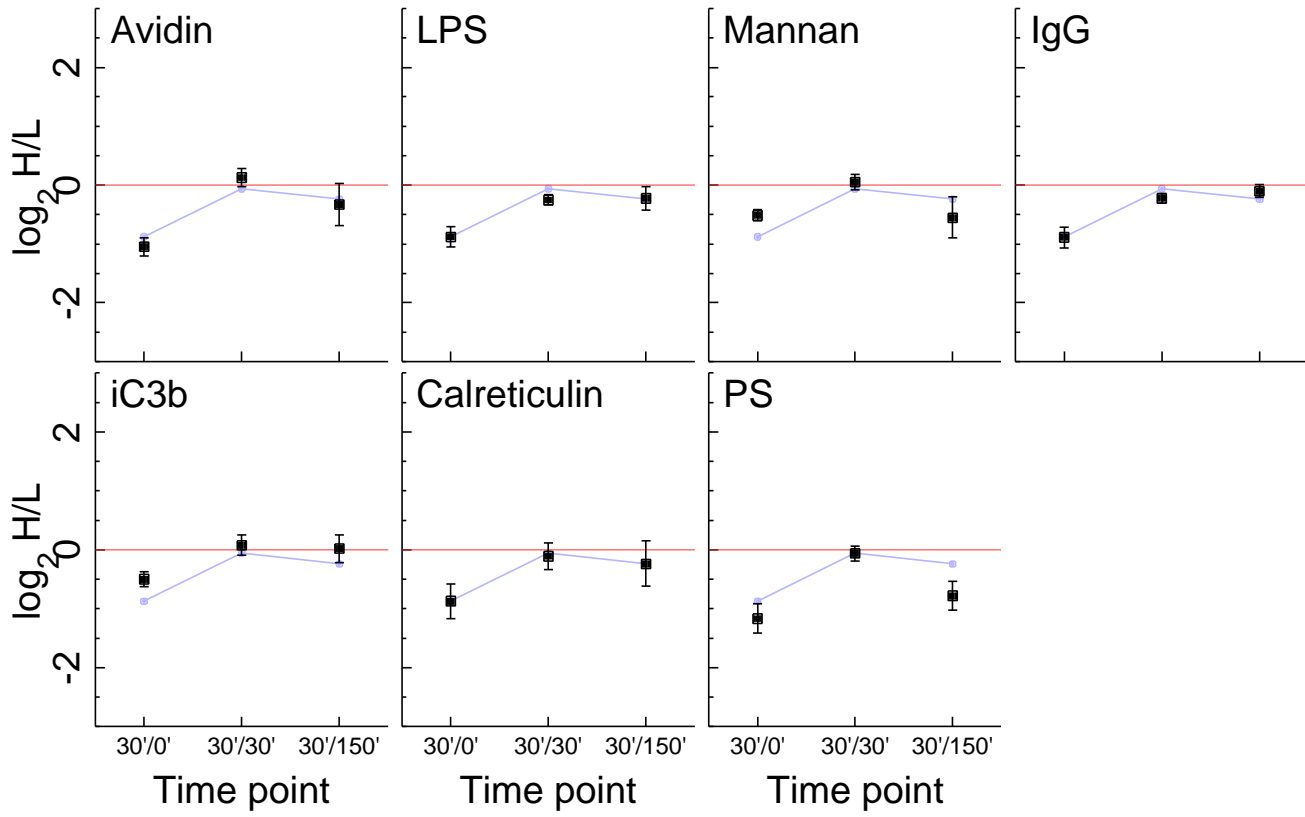

ap3m1 (Q9JKC8)

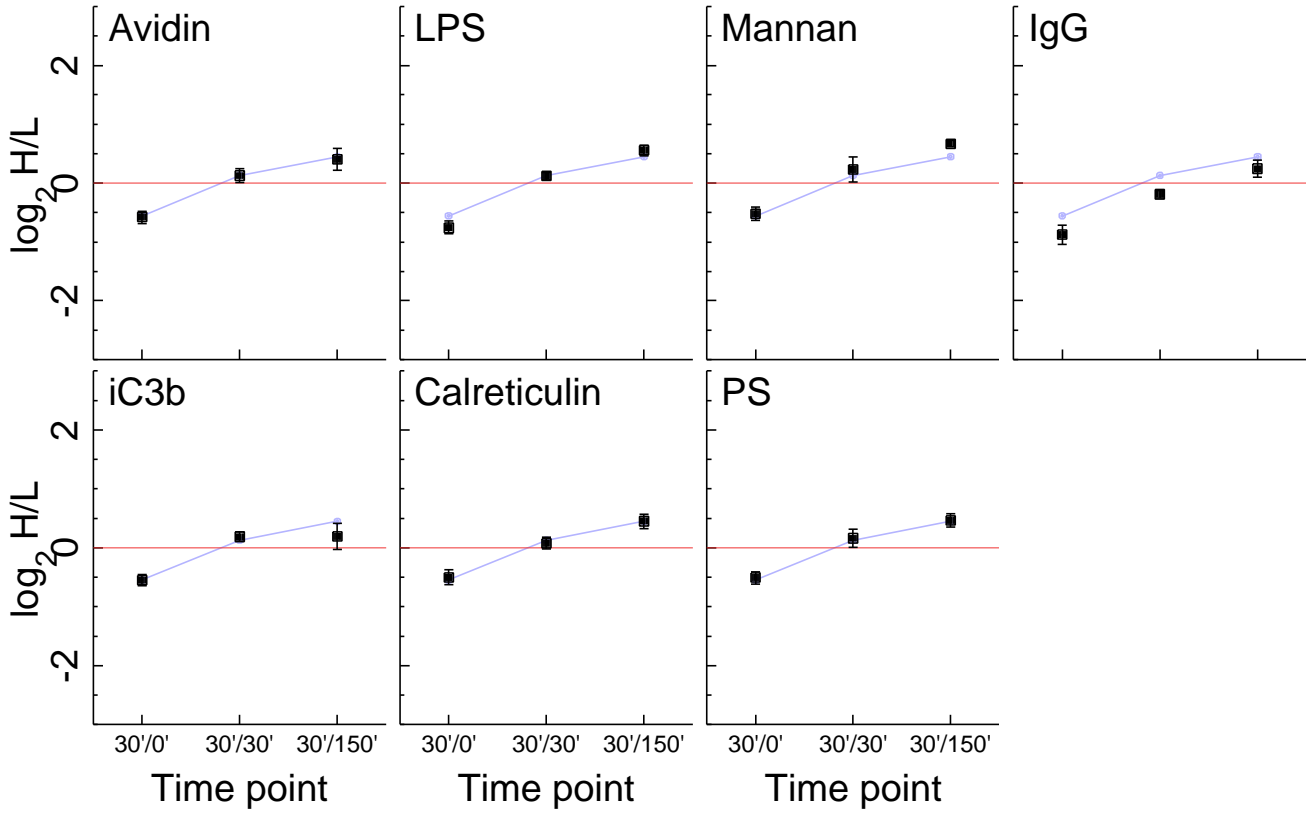

ap3s1 (Q9DCR2)

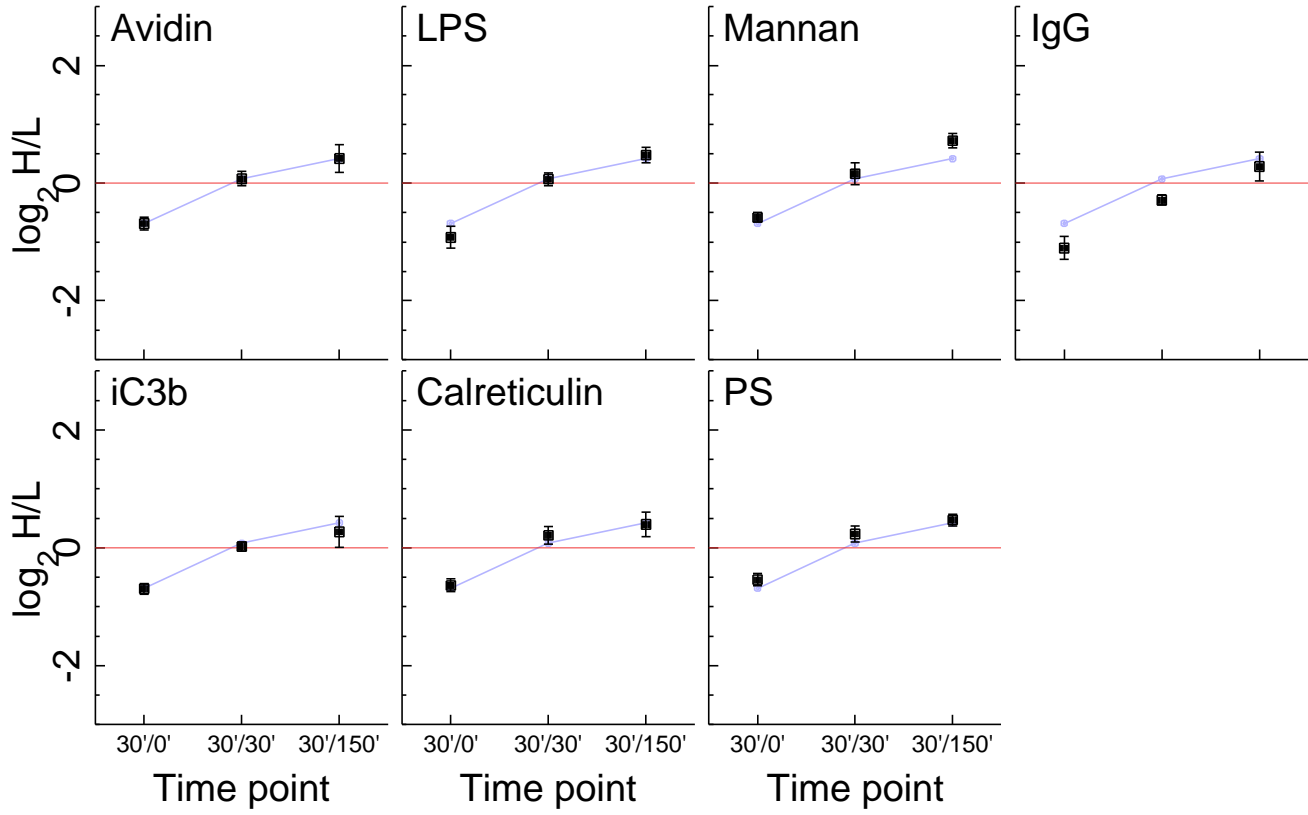

ap3s2 (Q8BSZ2)

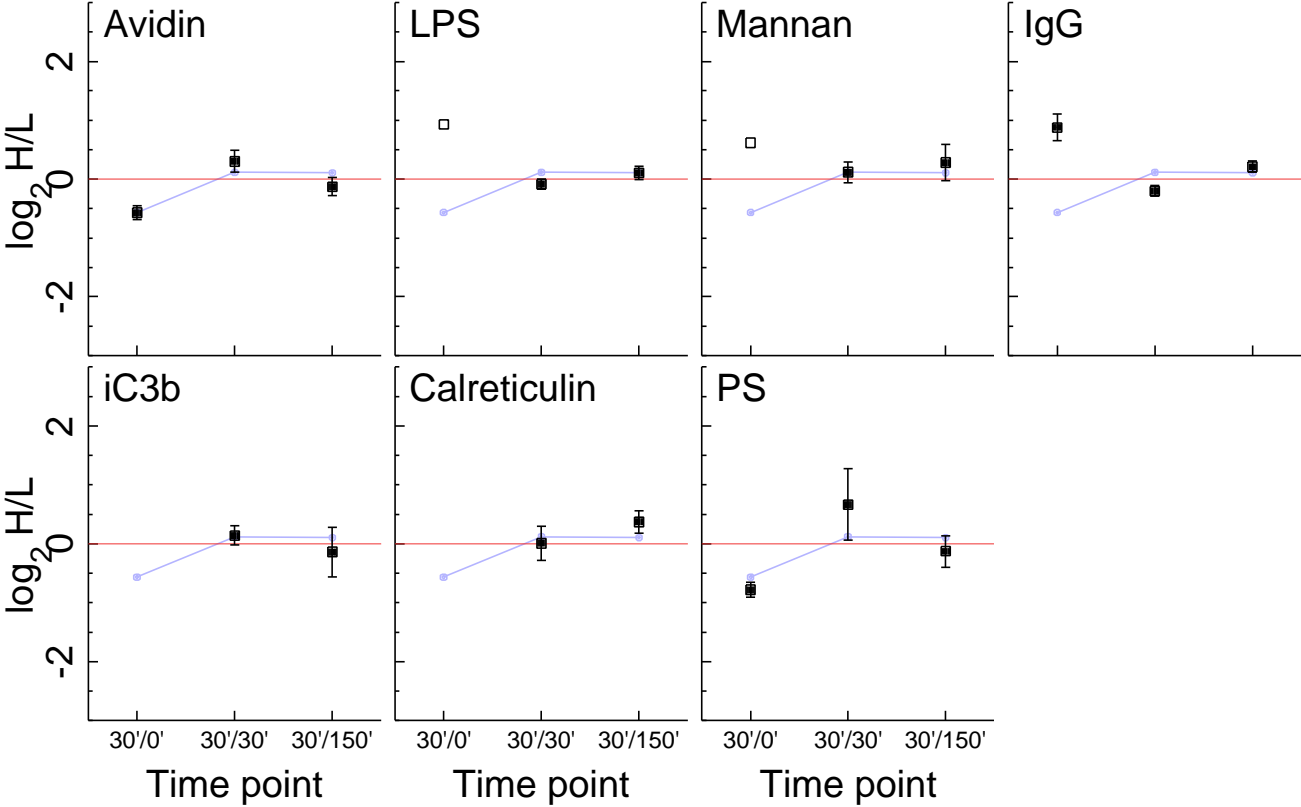

### aph1a (Q8BVF7)

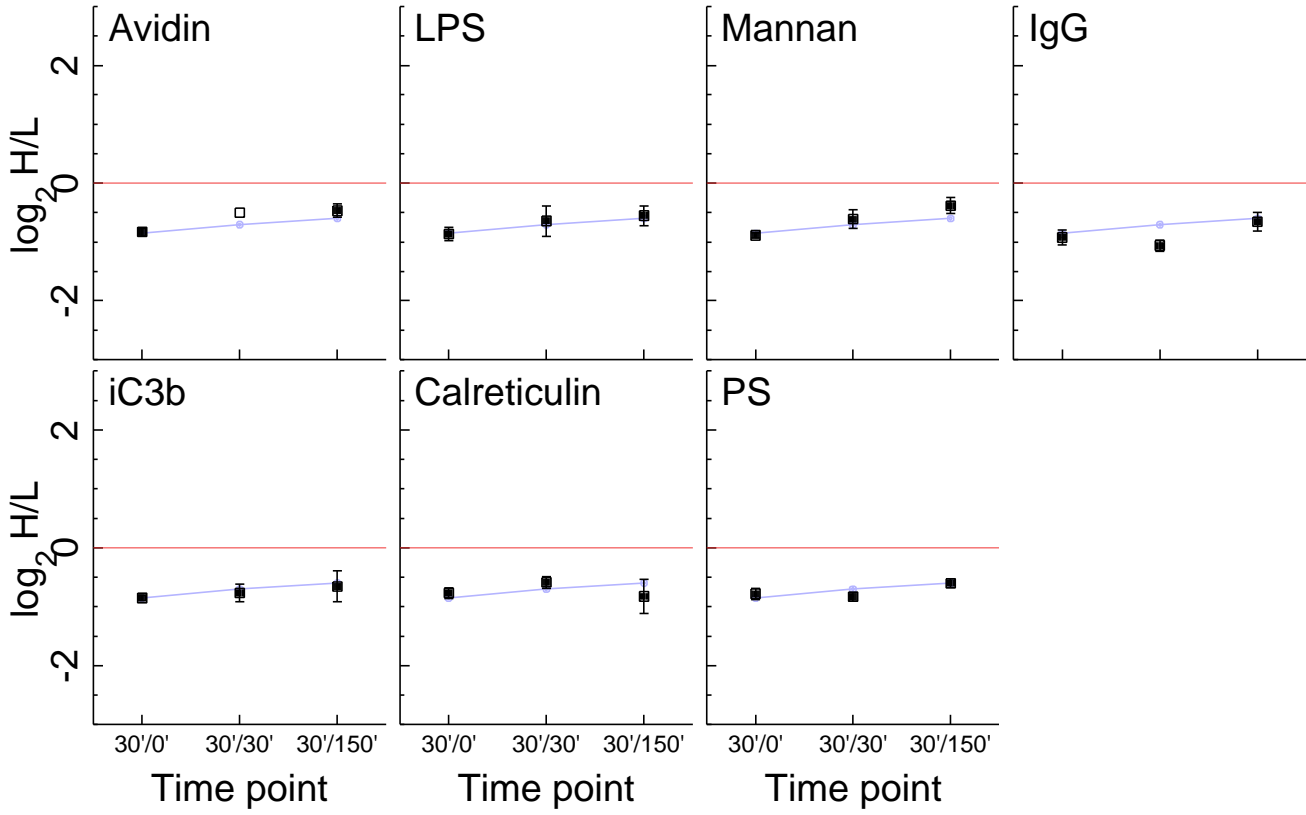

apmap (Q9D7N9)

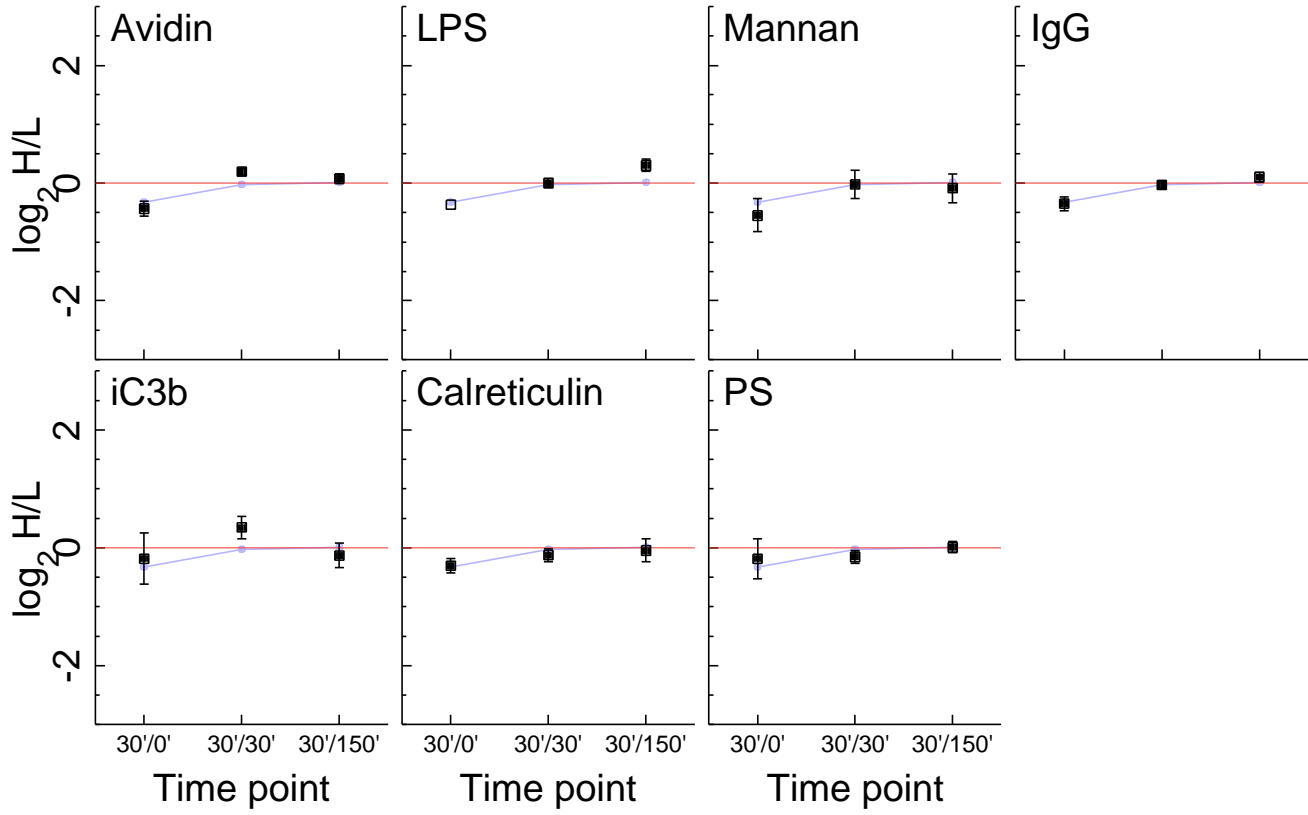

apoa1bp (Q8K4Z3)

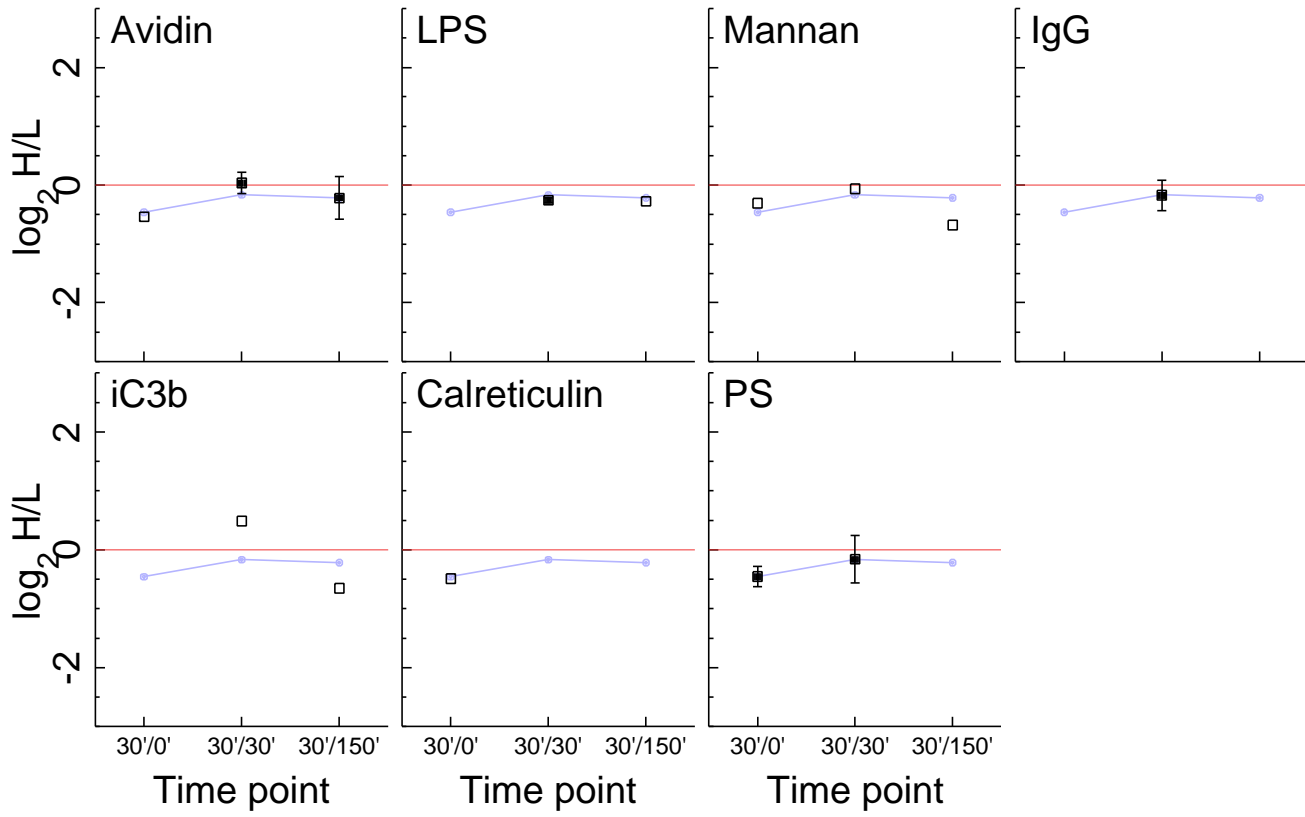

apob (E9Q414)

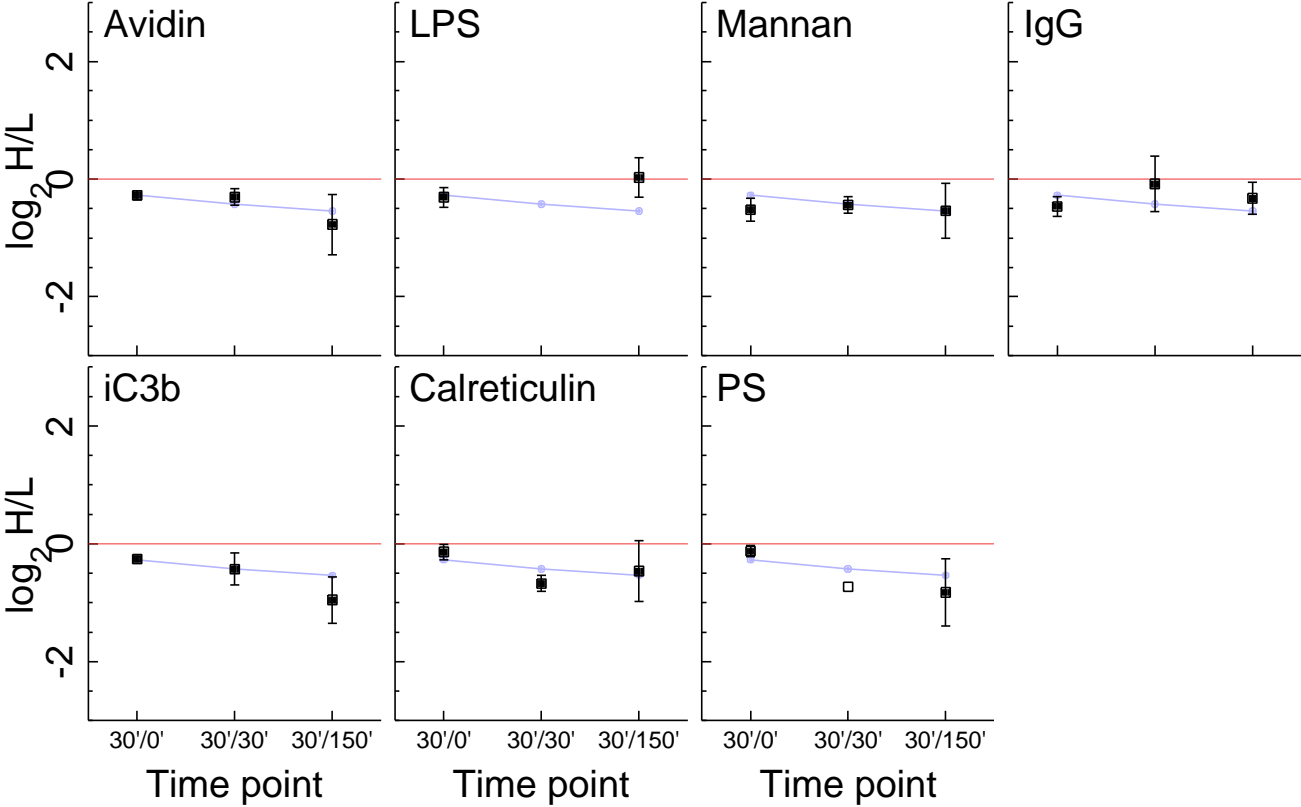



apobr (Q8VBT6)

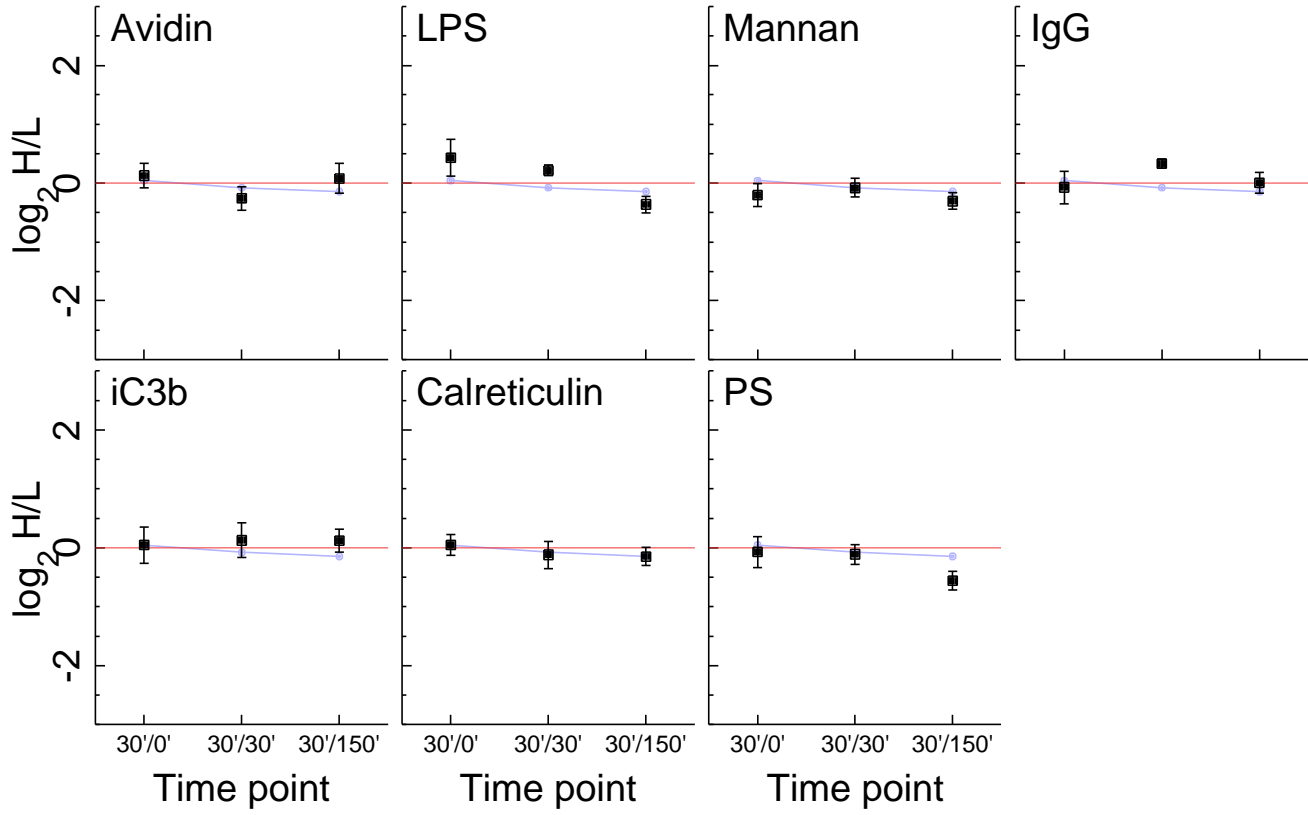

apoe (P08226)

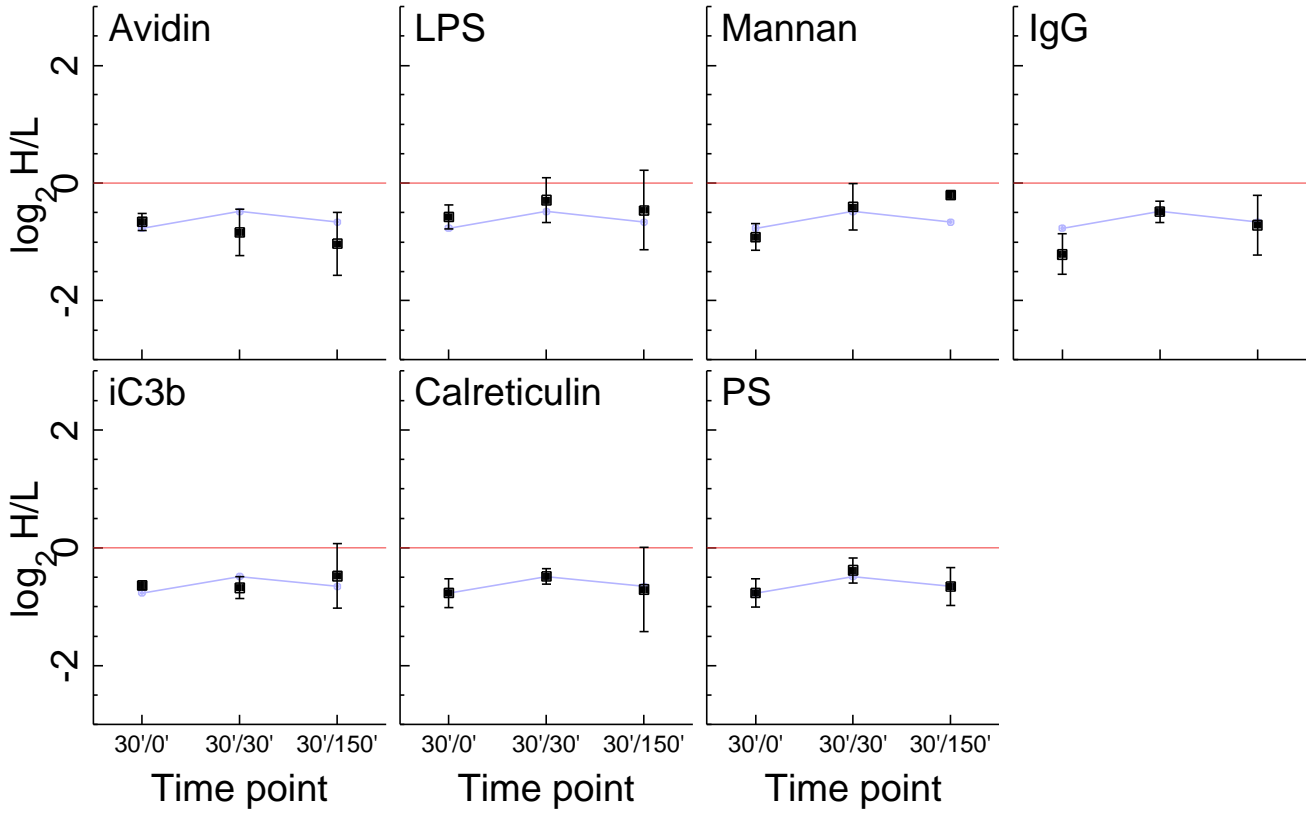

app (P12023)

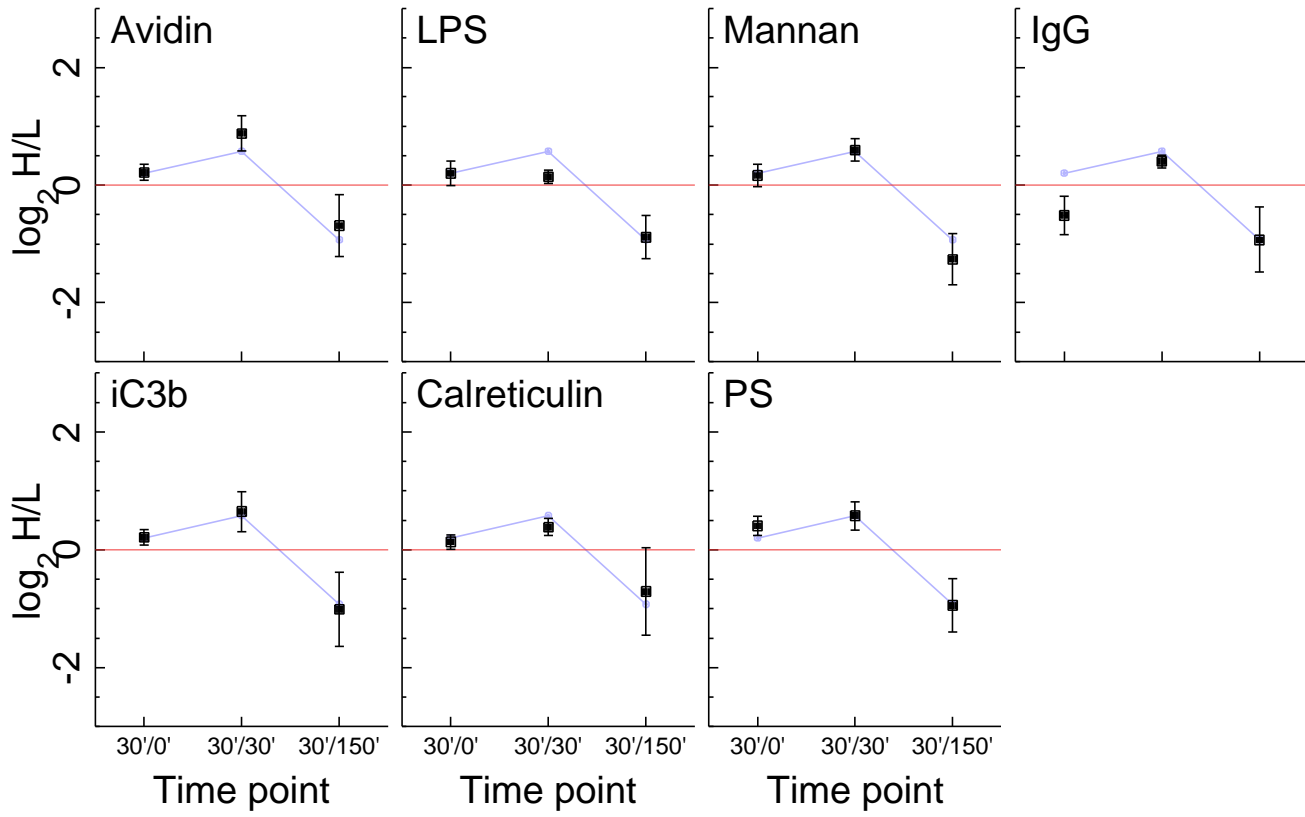

apr3 (Q6PGD0)

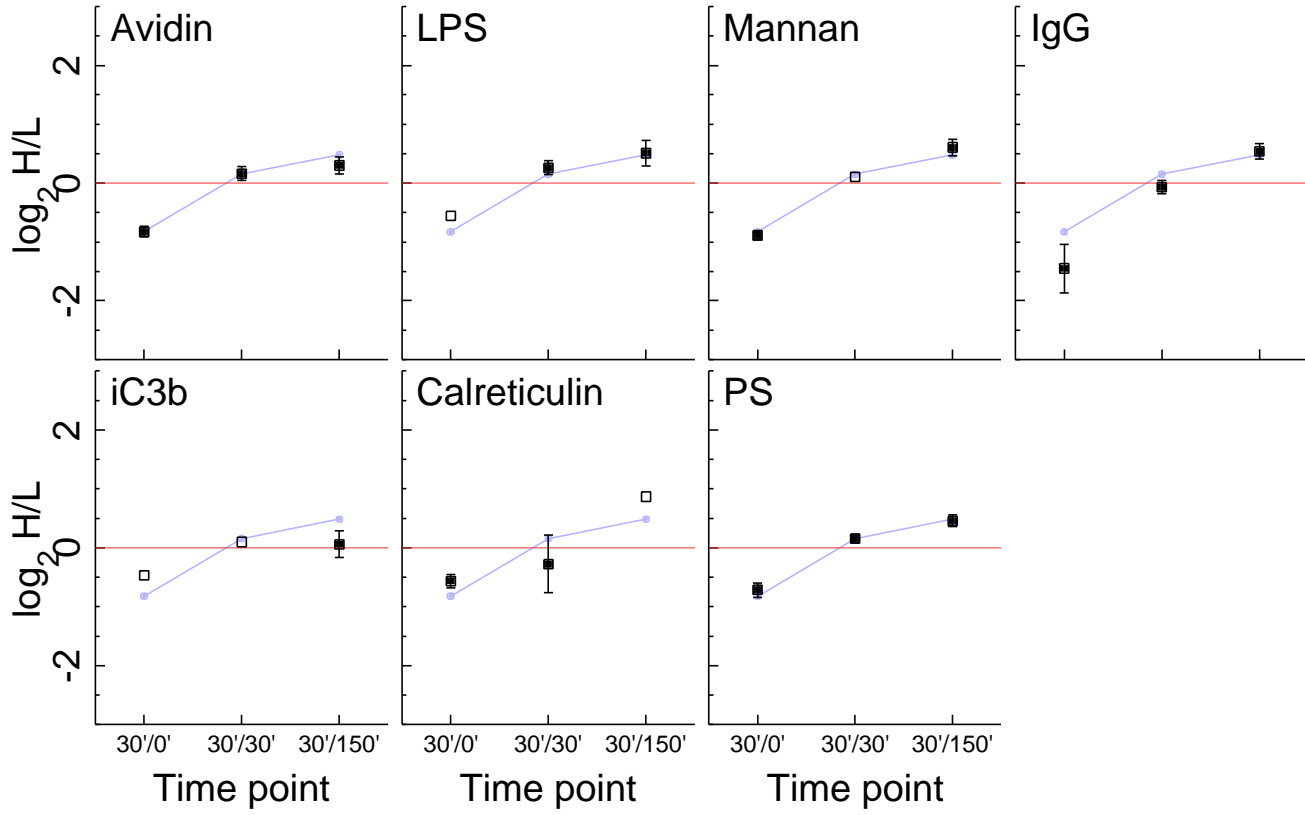

### araf (Q8CAD1)

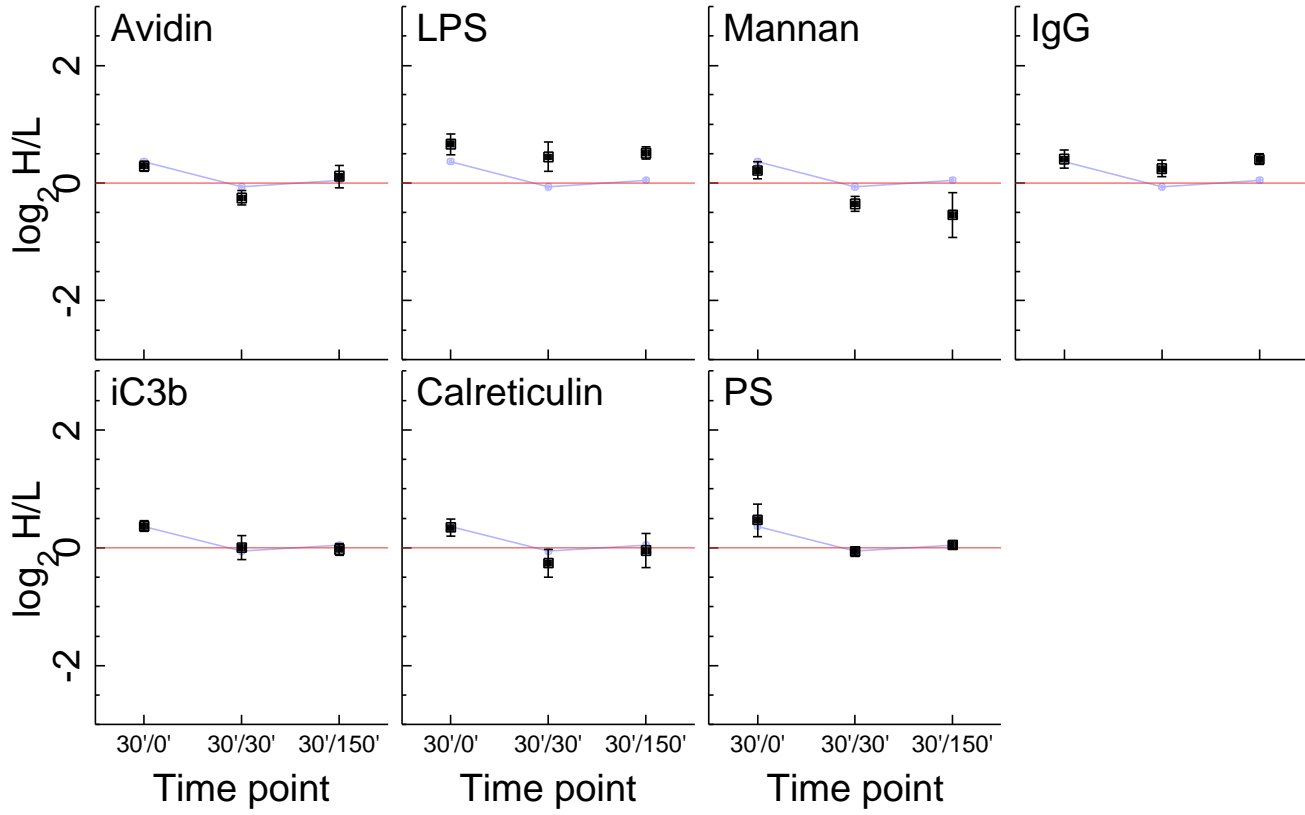

### arap1 (Q4LDD4)

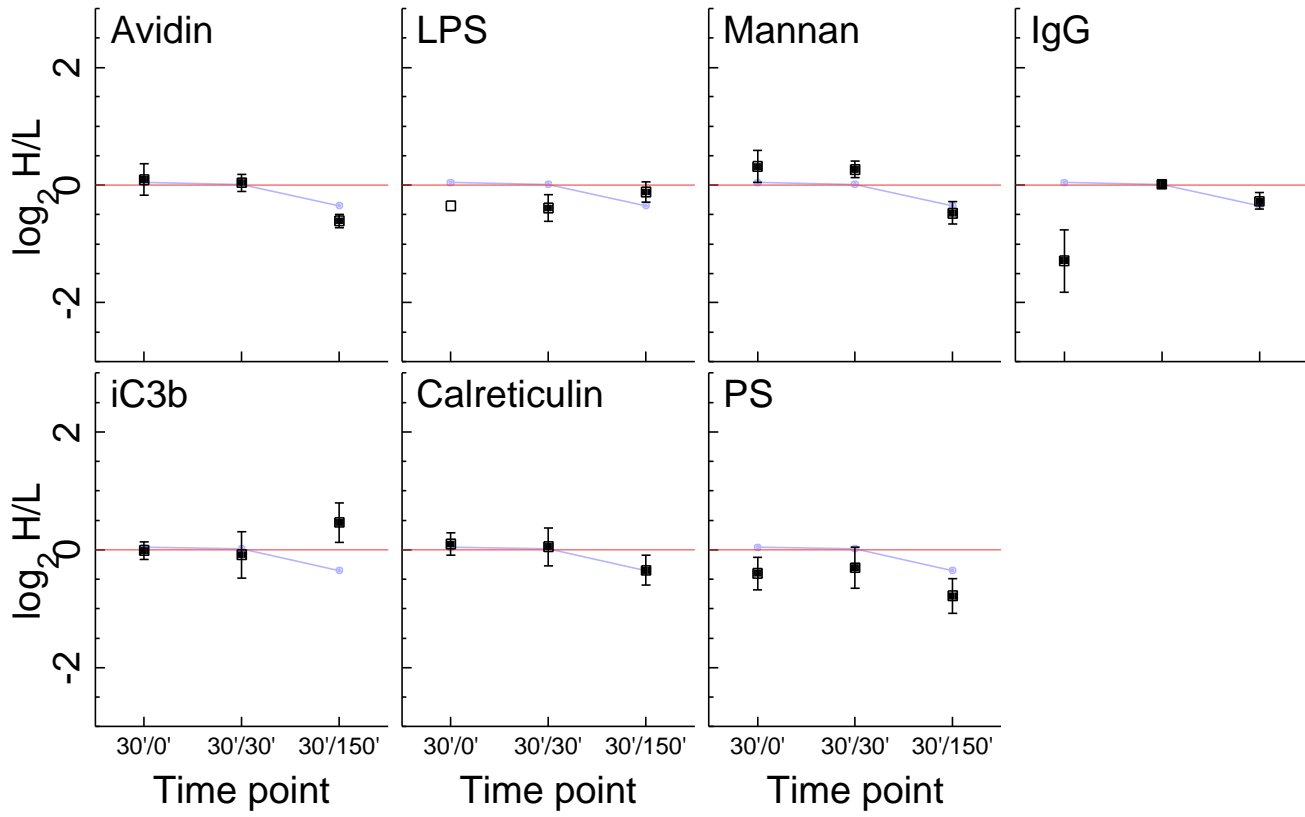

### arf3 (P61205)

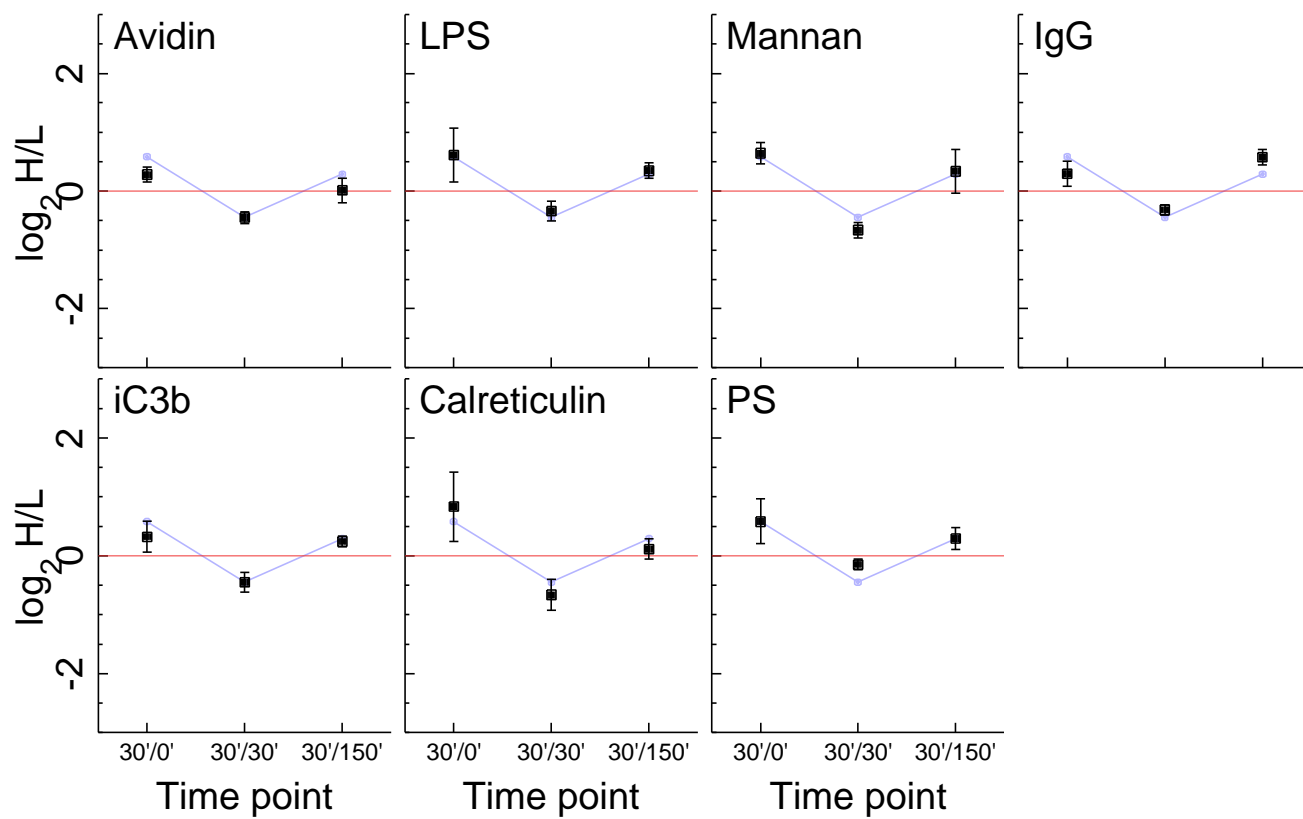

arf5 (P84084)

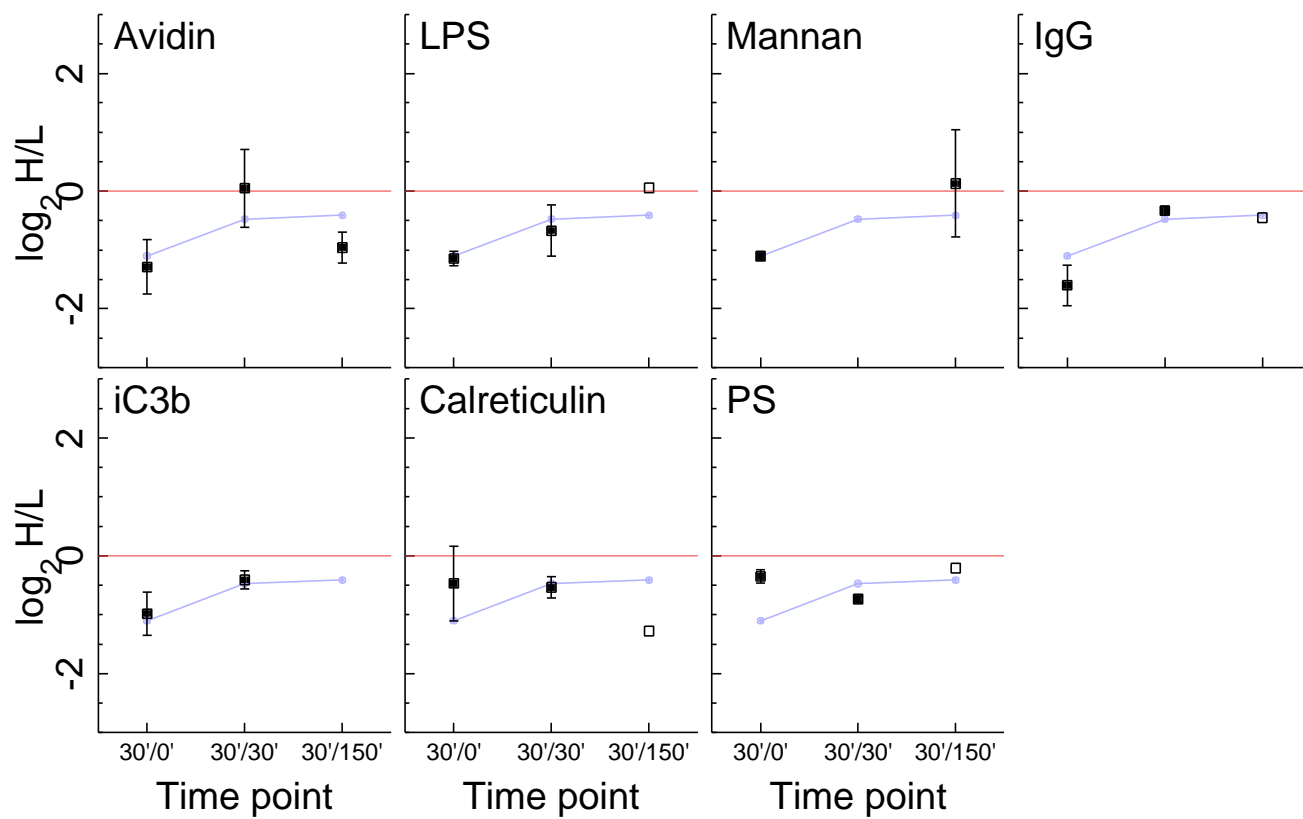



arf6 (P62331)

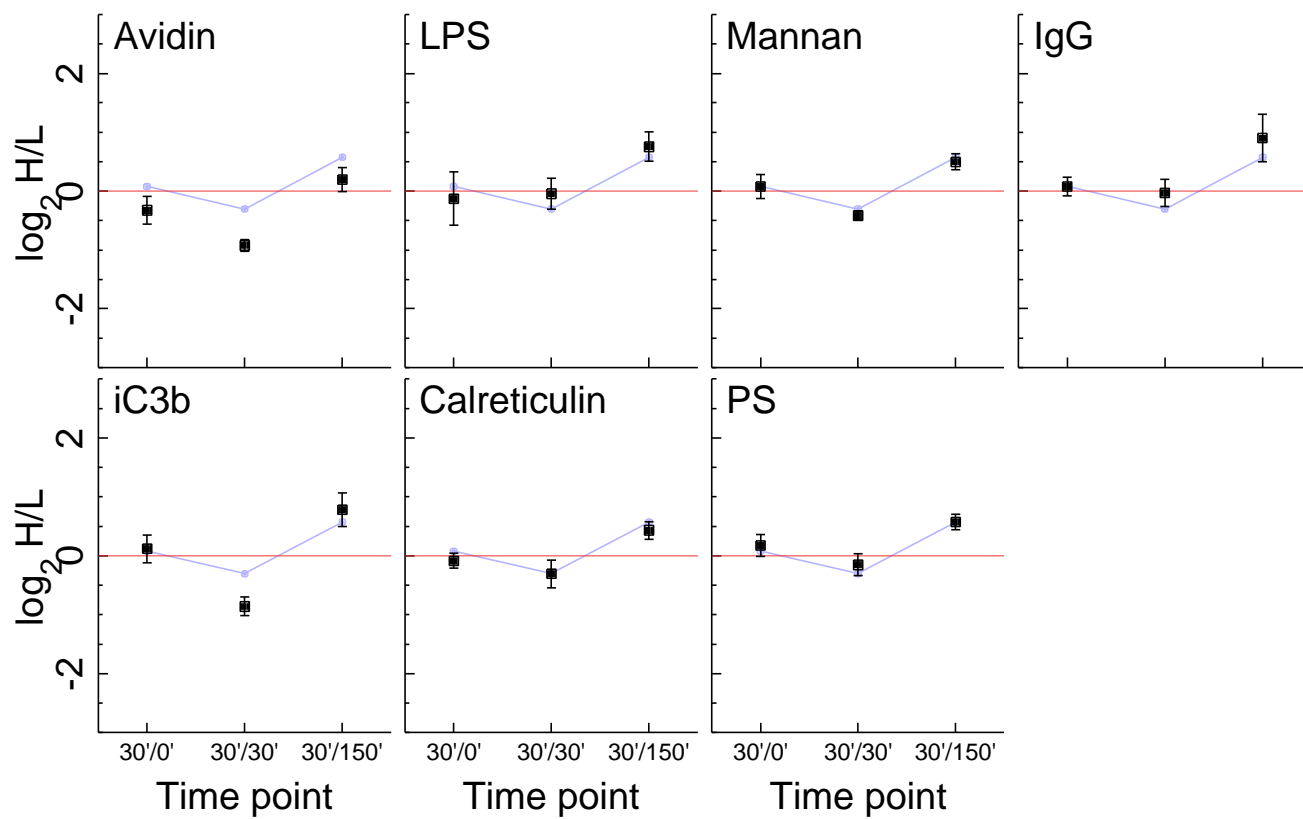

# arfgap1 (Q9EPJ9)

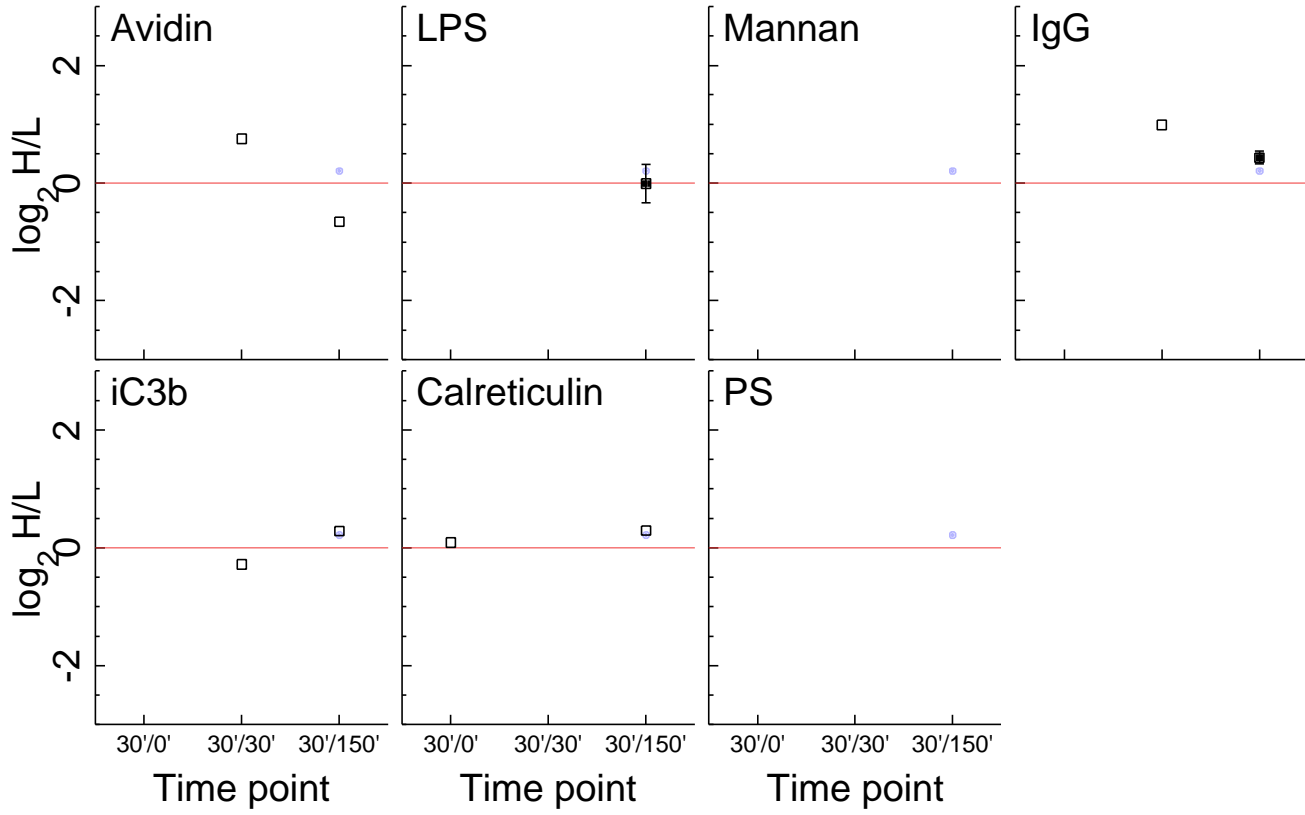

### arfgap2 (Q99K28)

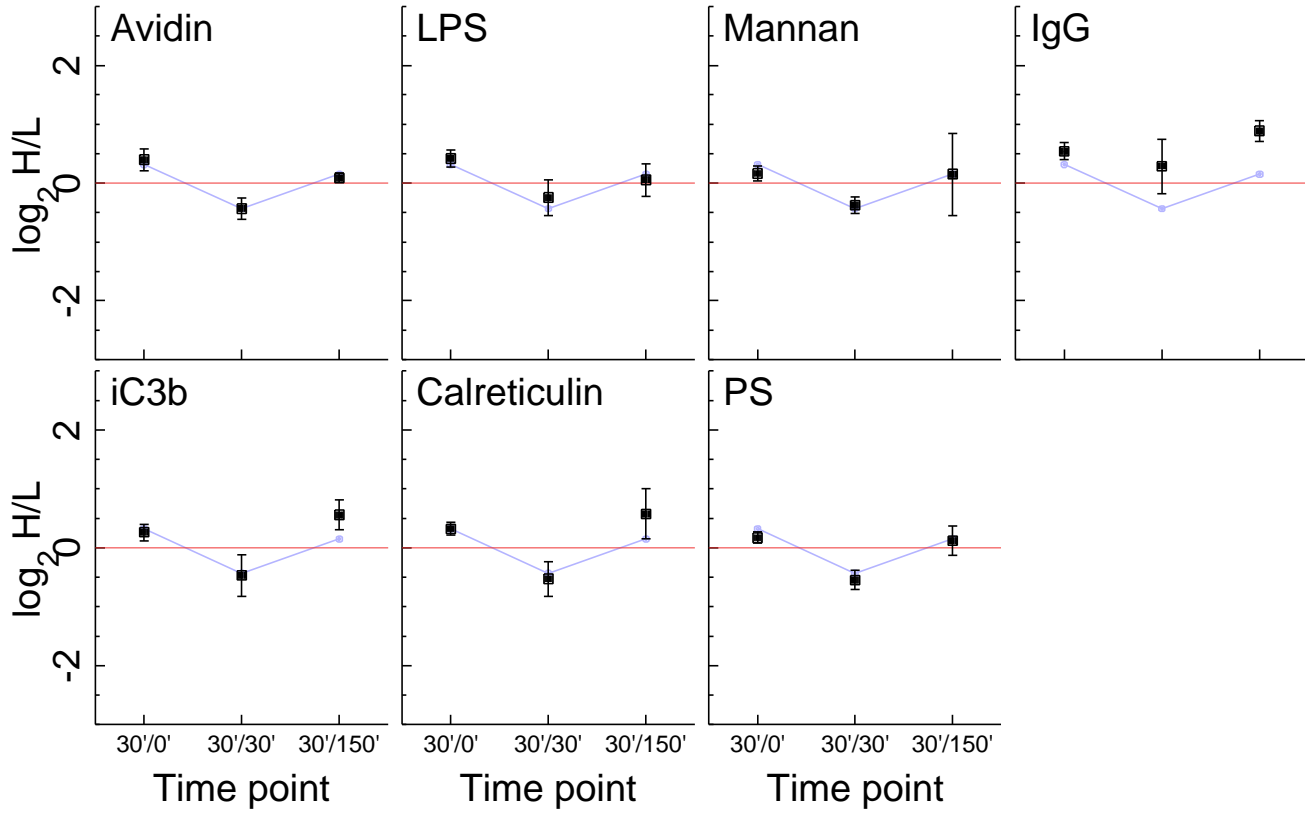

### arfgap3 (Q9D8S3)

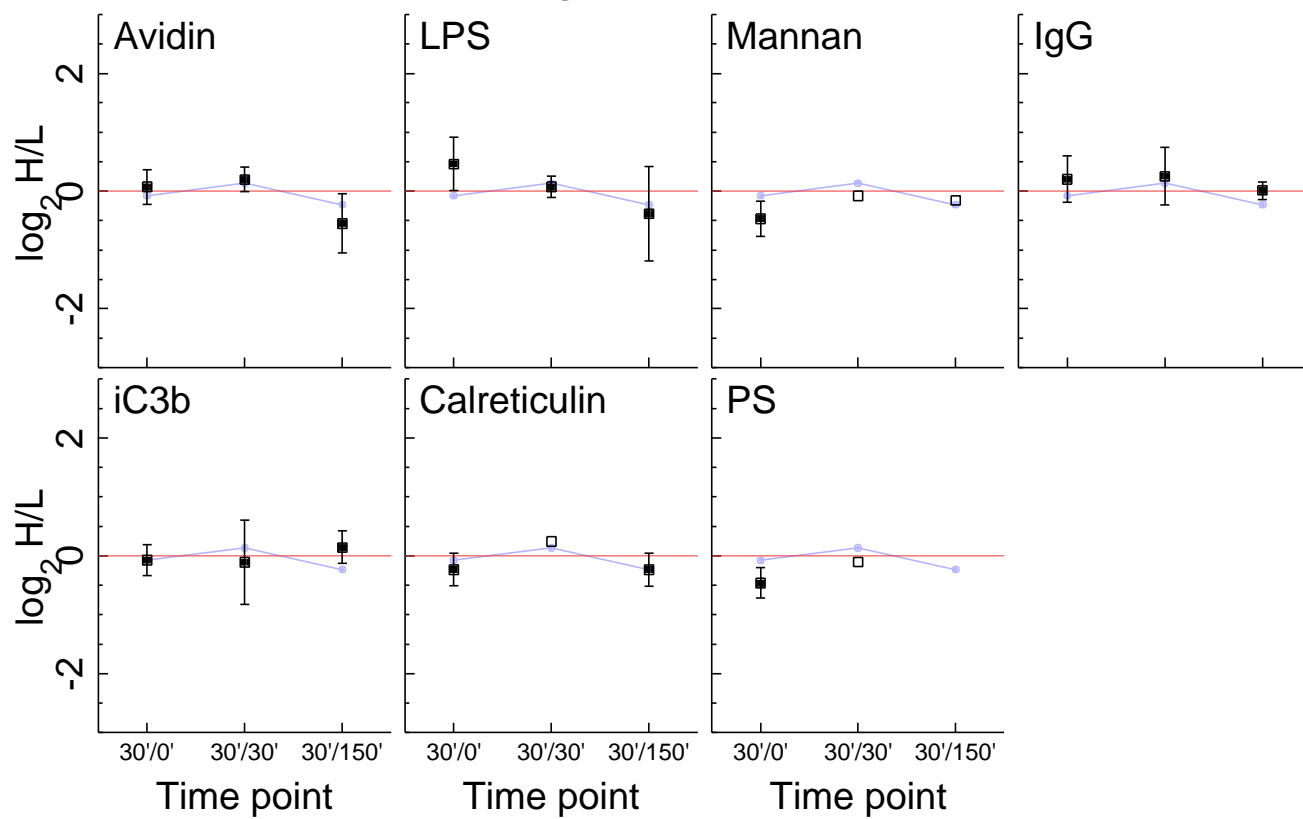

### arfip1 (G5E8V9)

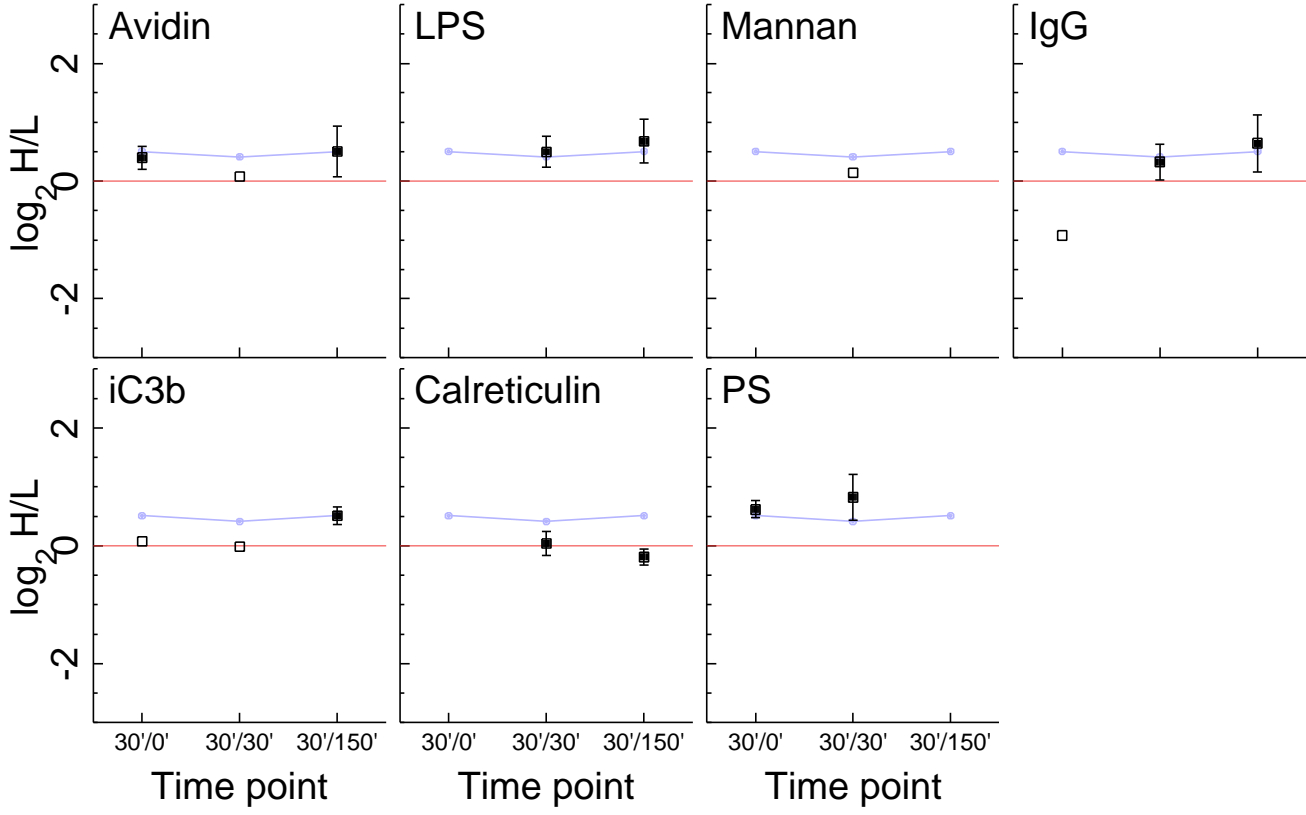

### arfrp1 (Q8BXL7)

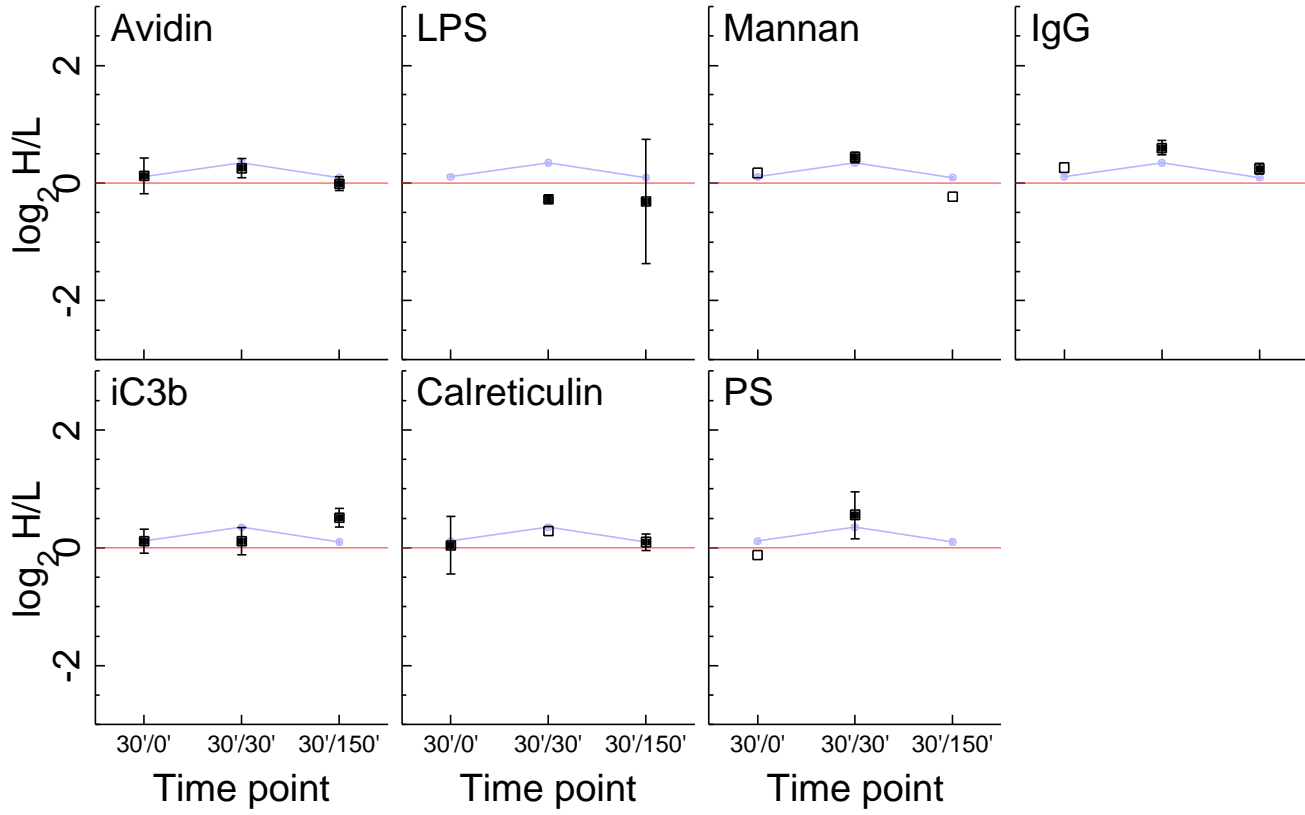

### arhgap17 (Q3UIA2)

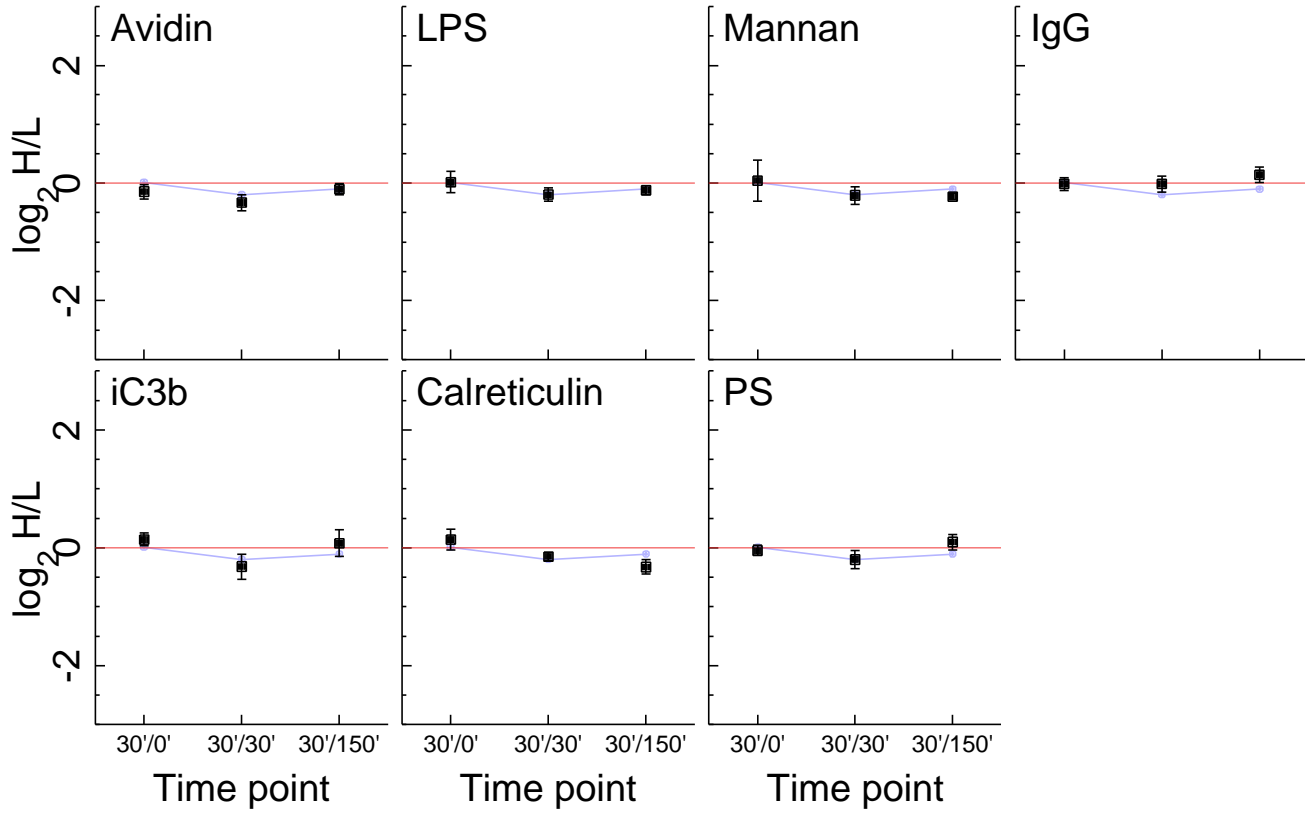

# arhgap1 (A2AH25)

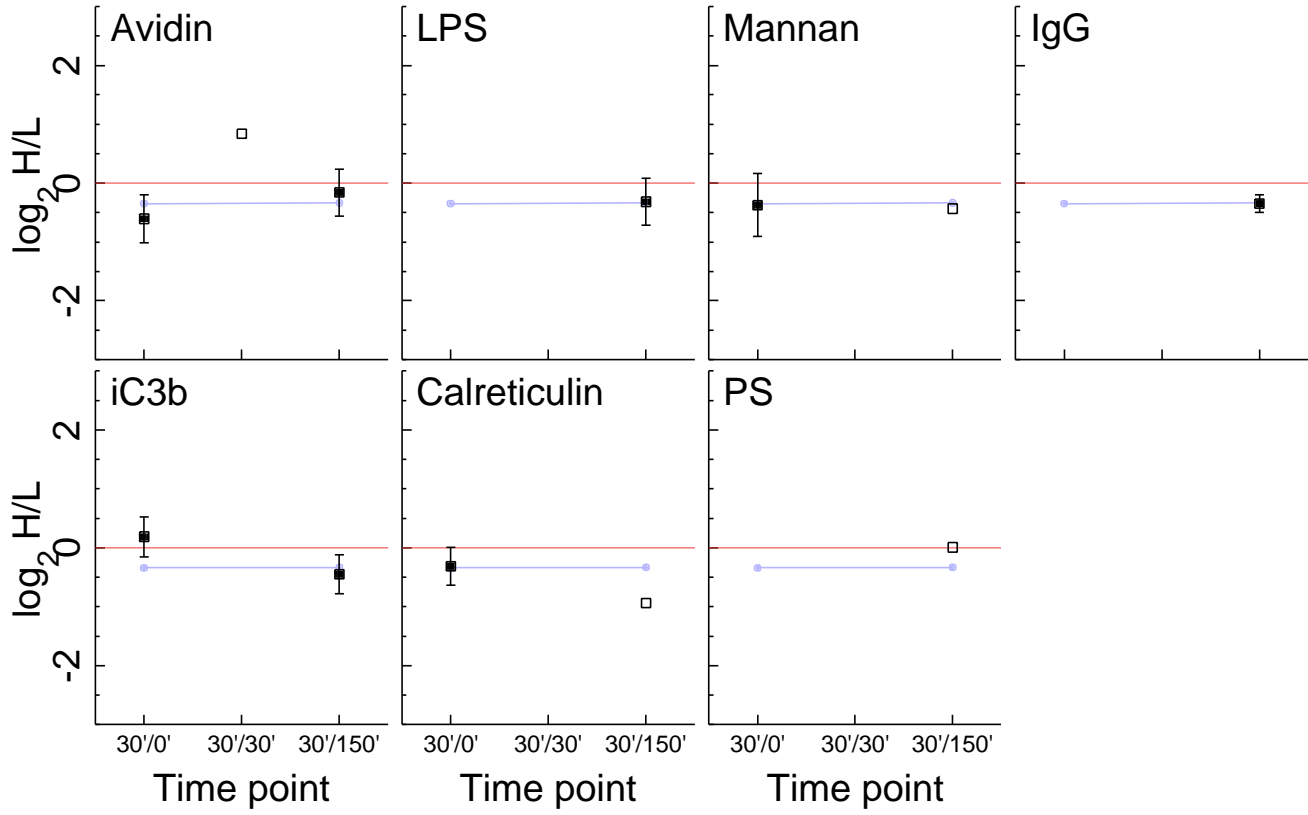



### arhgap22 (Q8BL80)

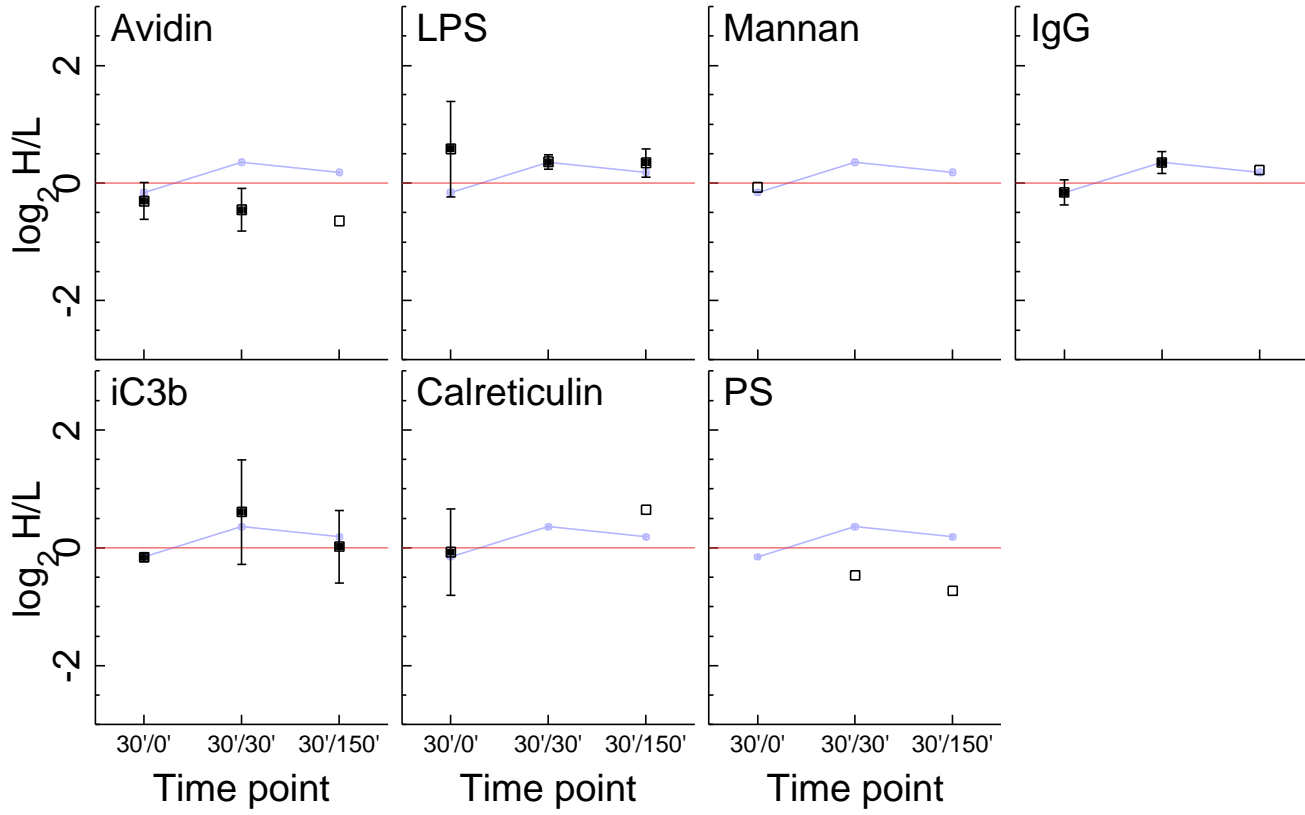

### arhgap25 (Q8BYW1)

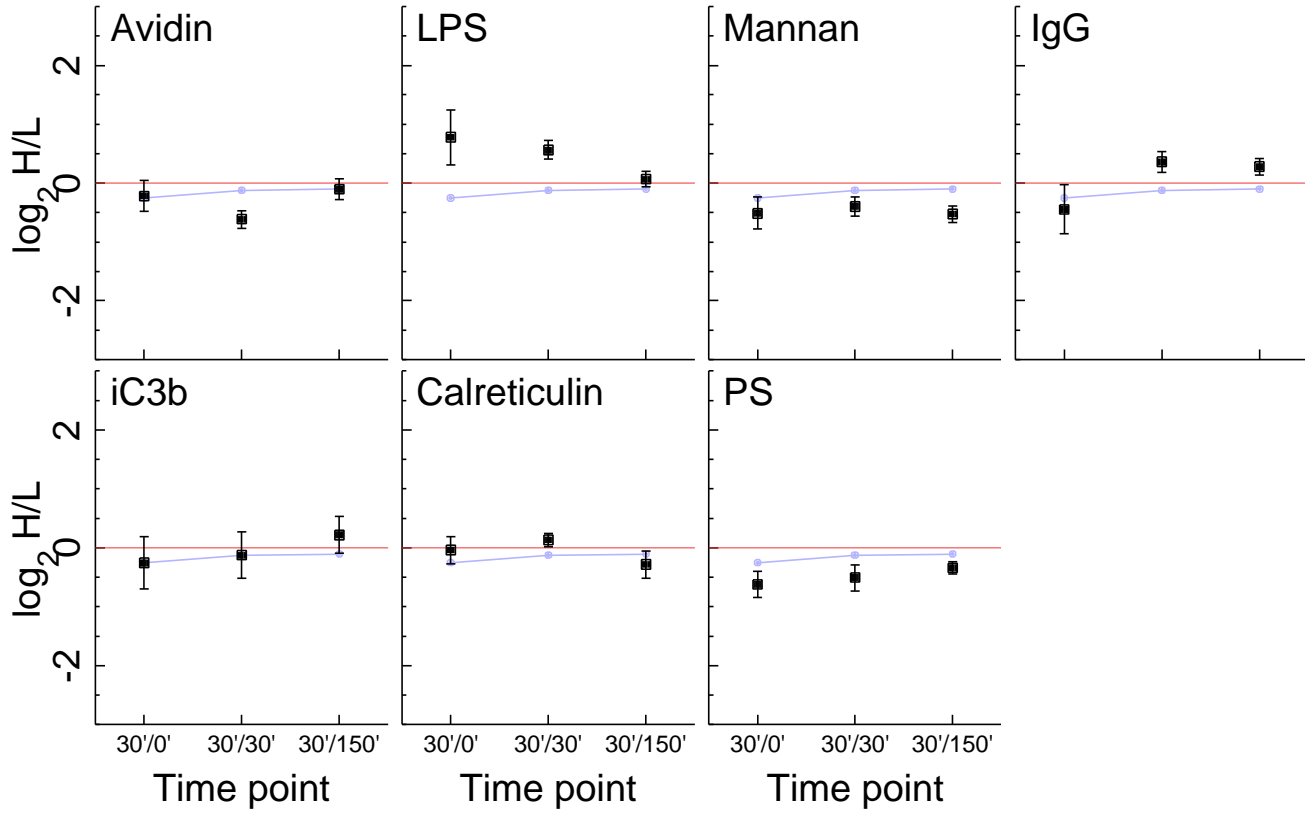

### arhgap30 (Q640N3)

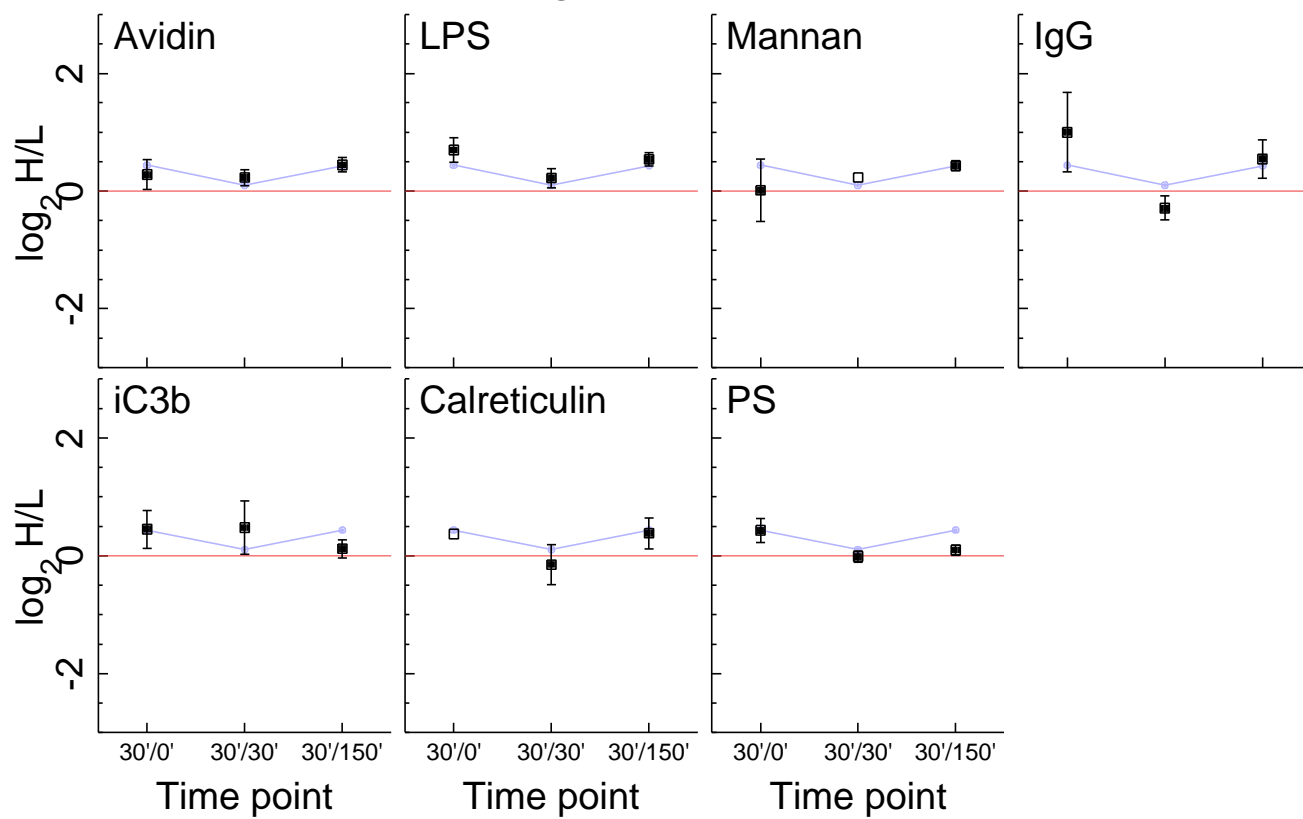

### arhgap4 (B1AUY3)

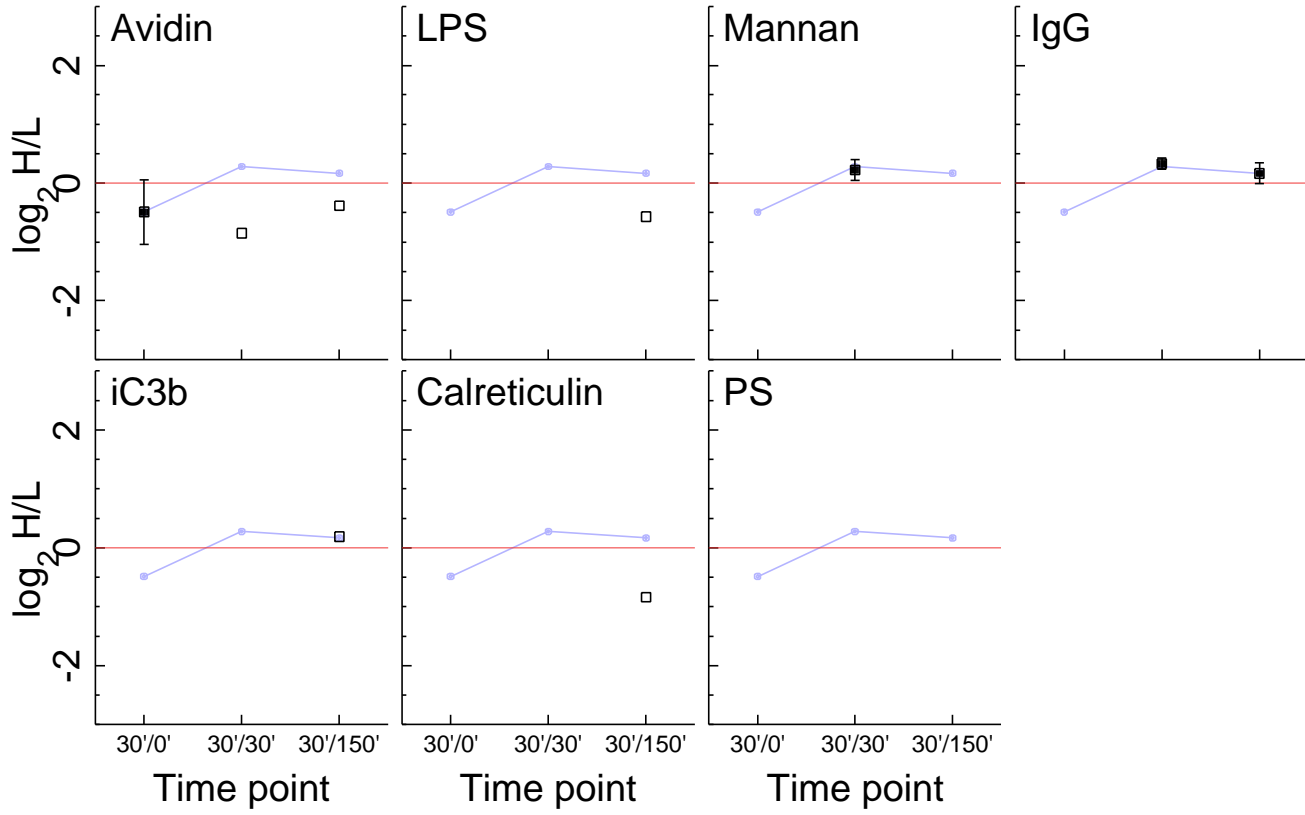

### arhgap9 (Q8QZW8)

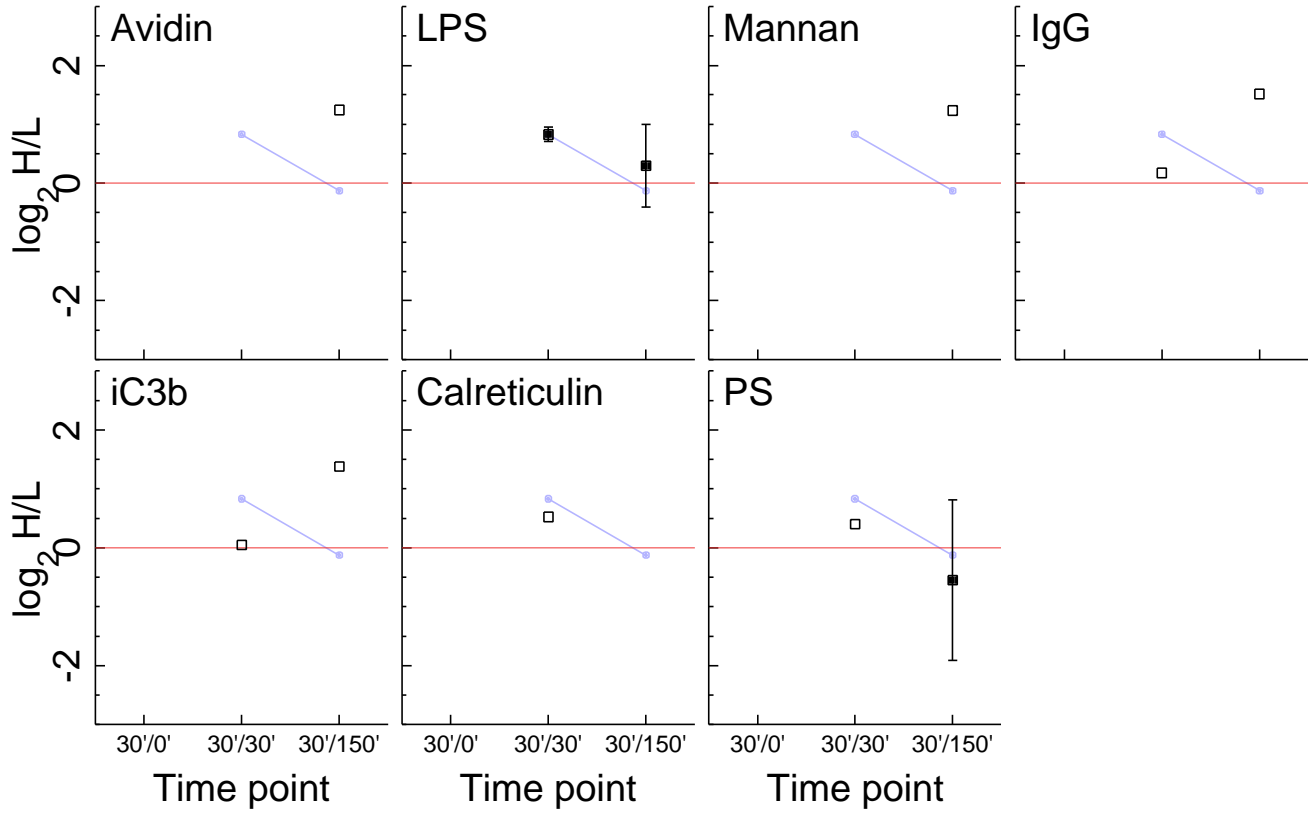

# arhgdia (Q99PT1)

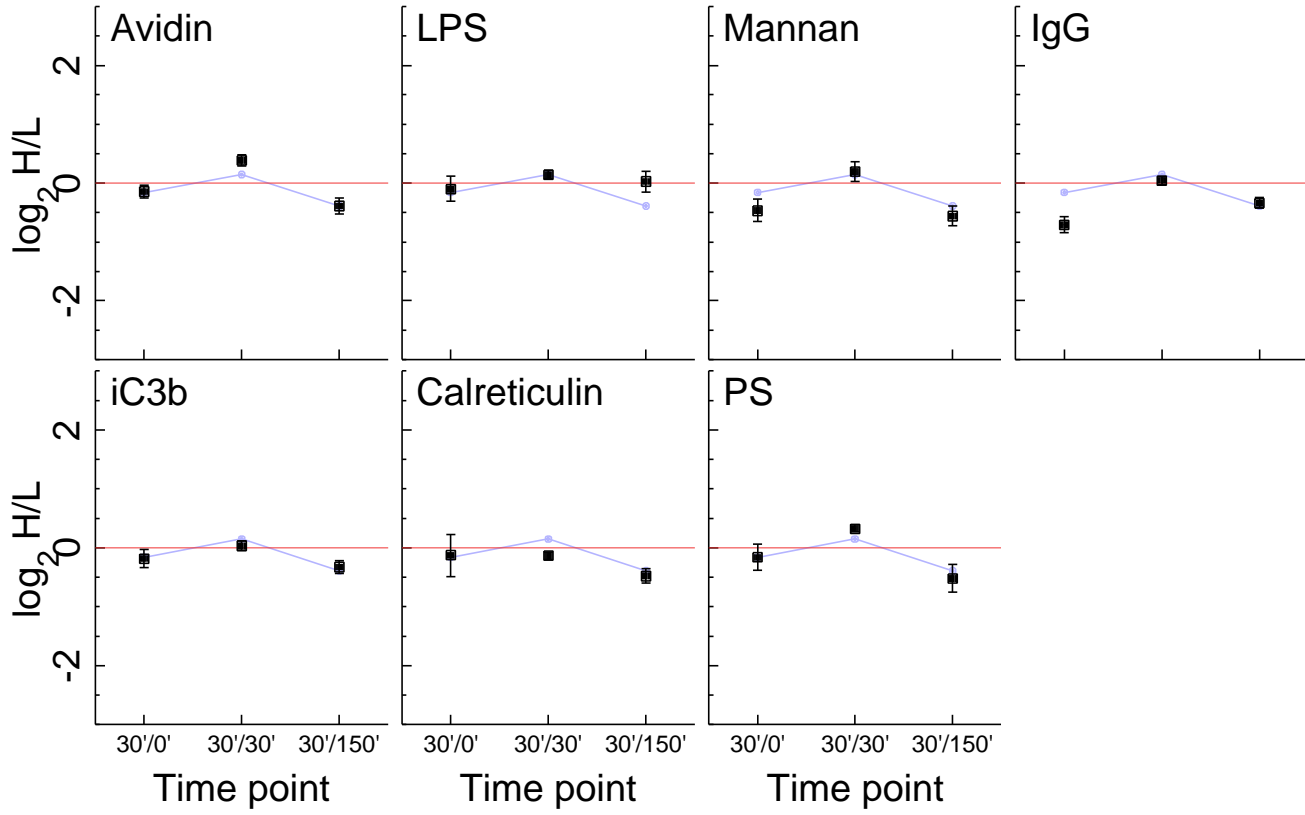

arhgdib (Q61599)

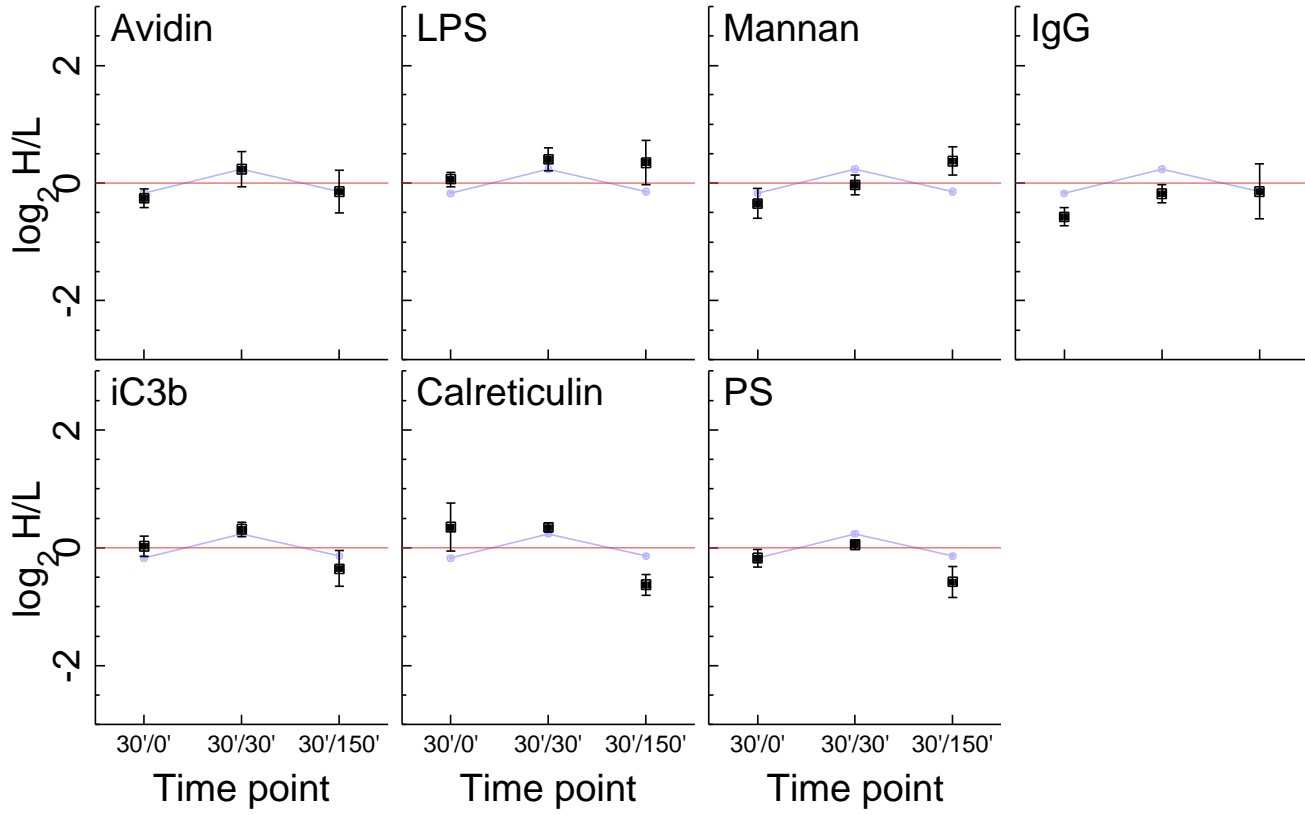

### arhgef10l (A2AWP8)

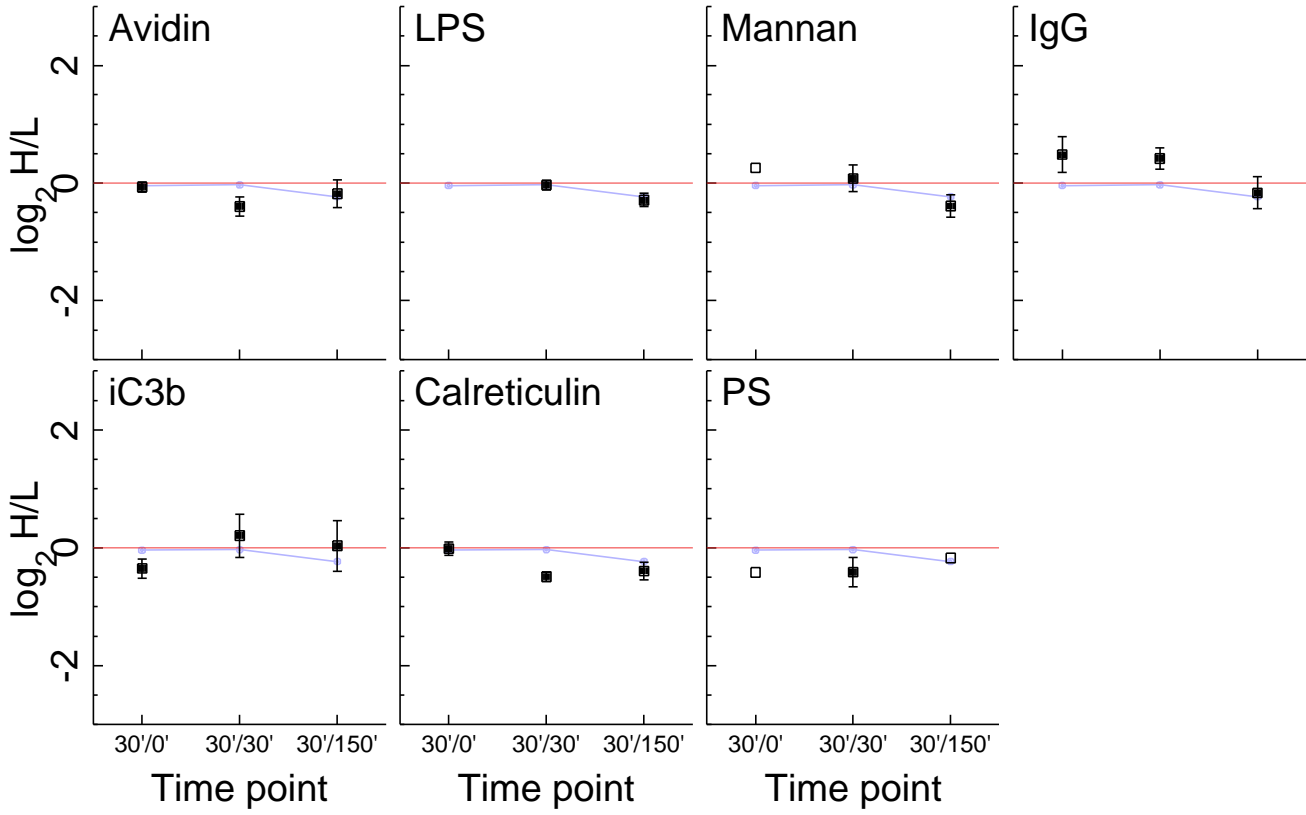



### arhgef1 (Q61210)

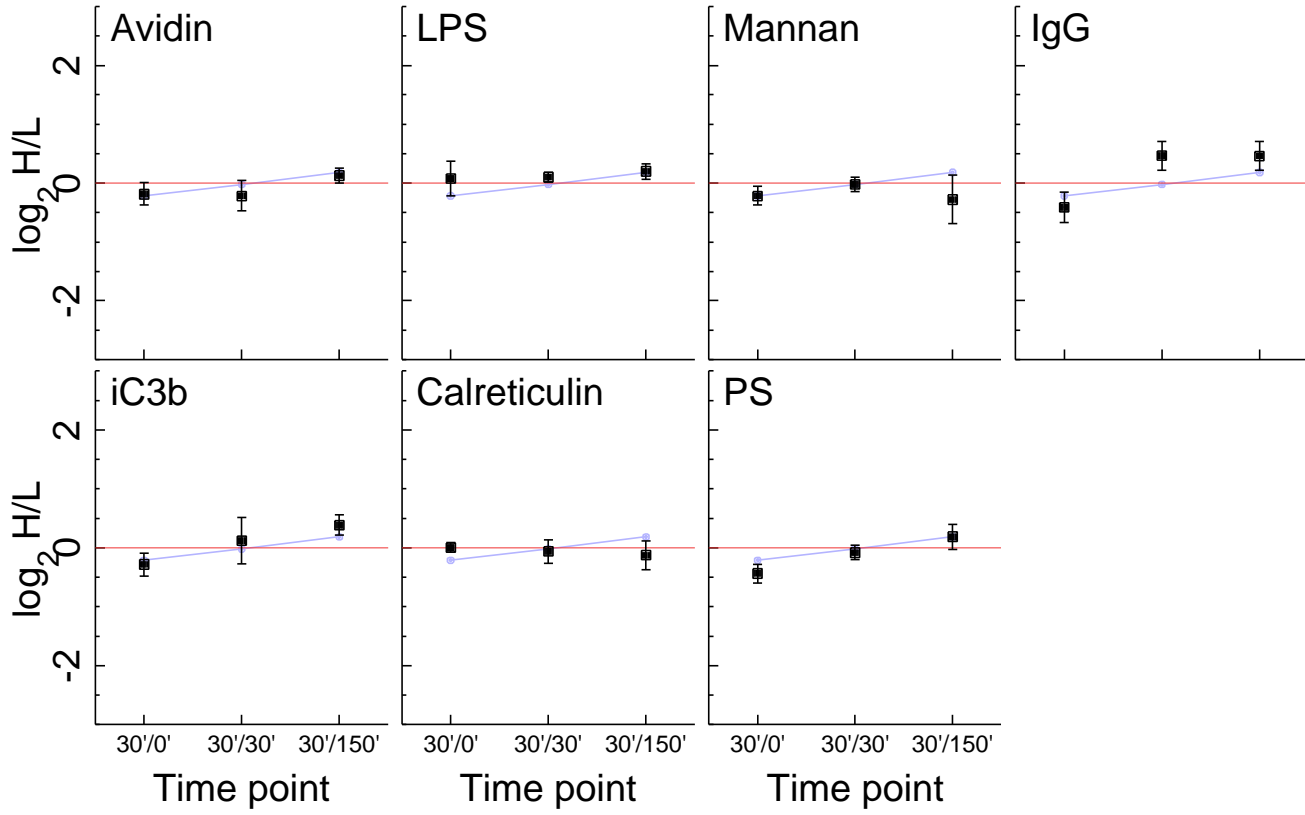

# arhgef2 (Q60875)

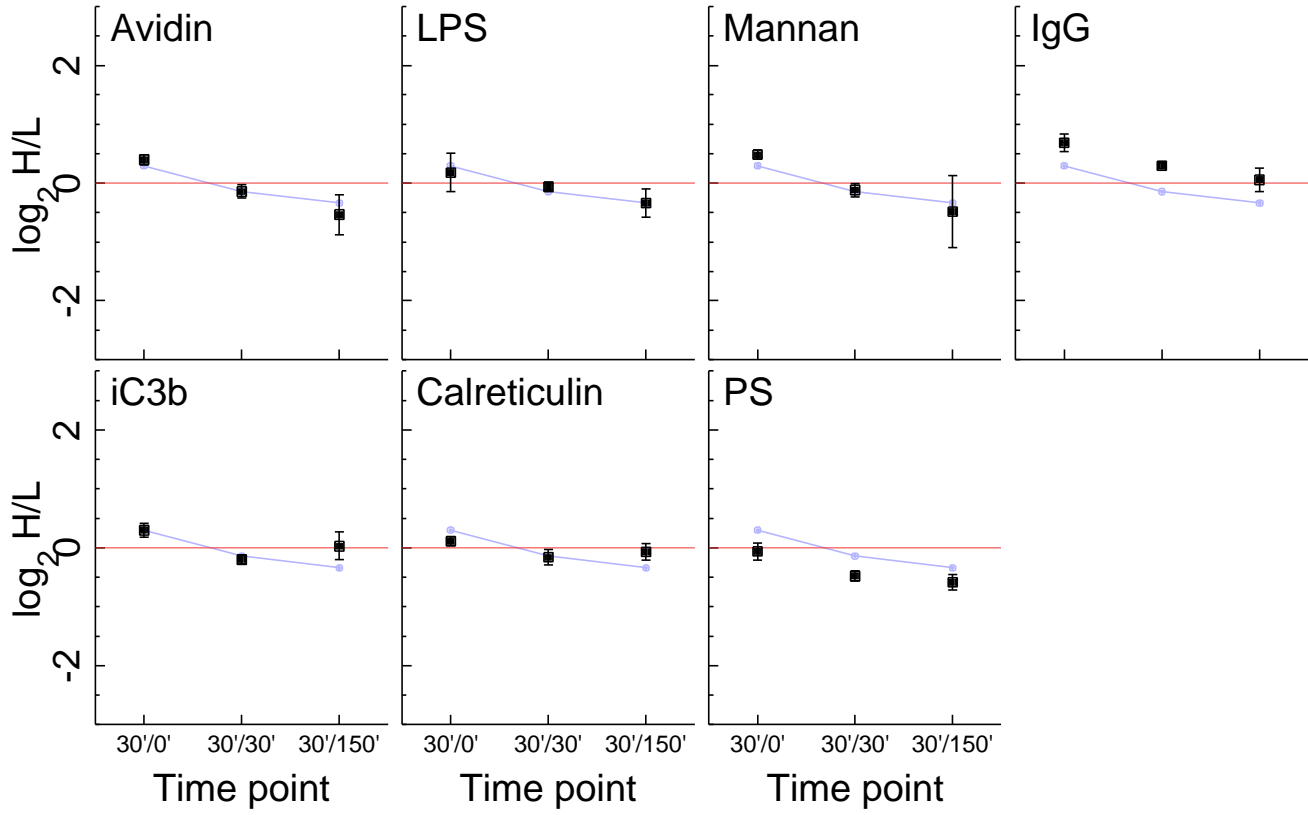

### arhgef7 (Q9ES28)

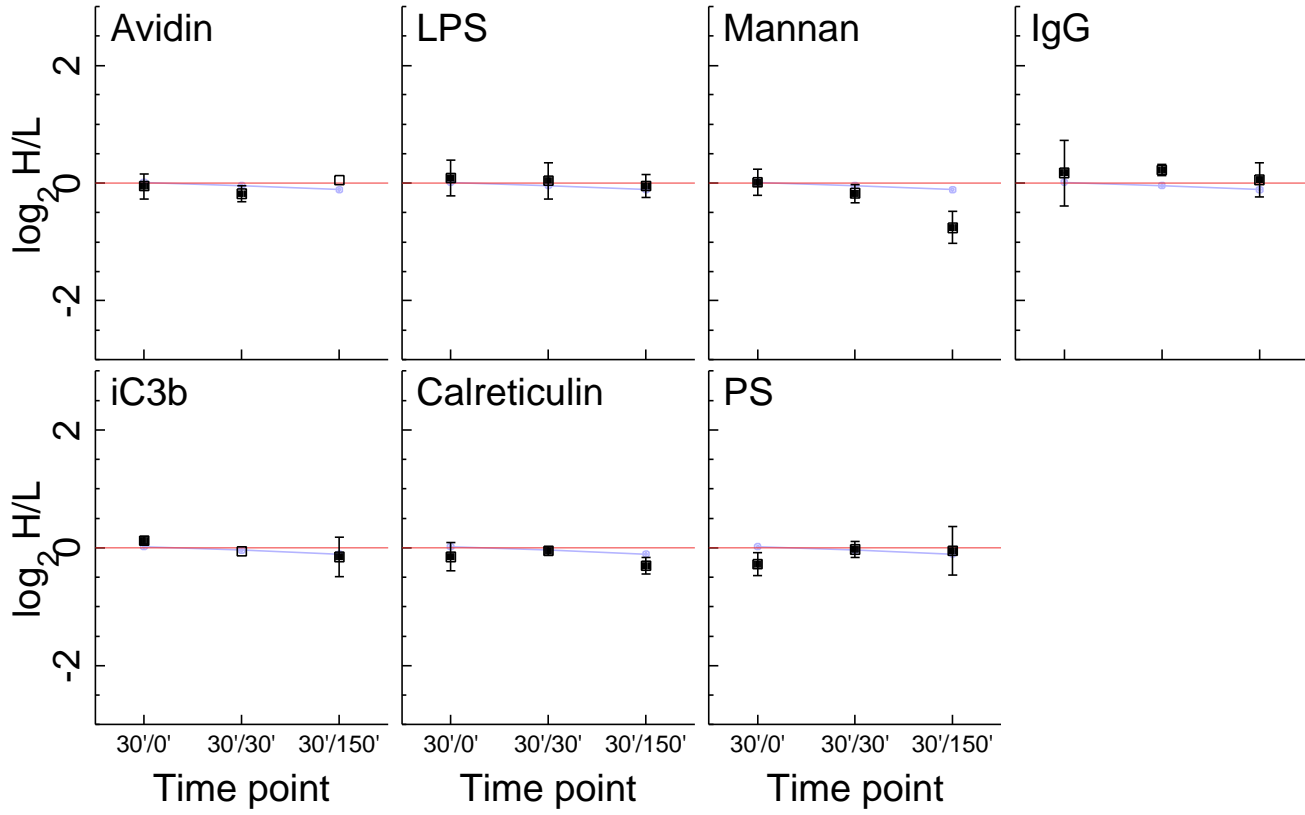

### arl1 (P61211)

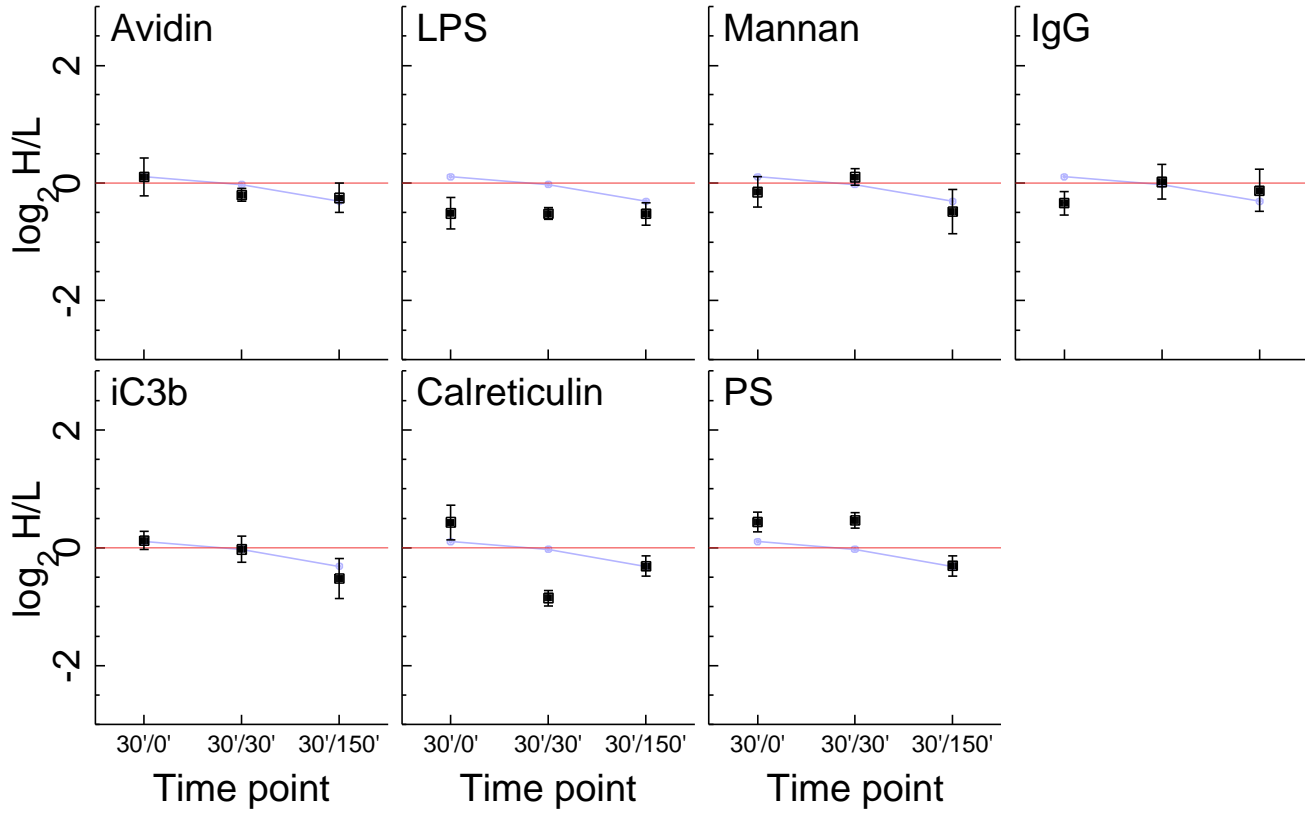

arl4c (P61208)

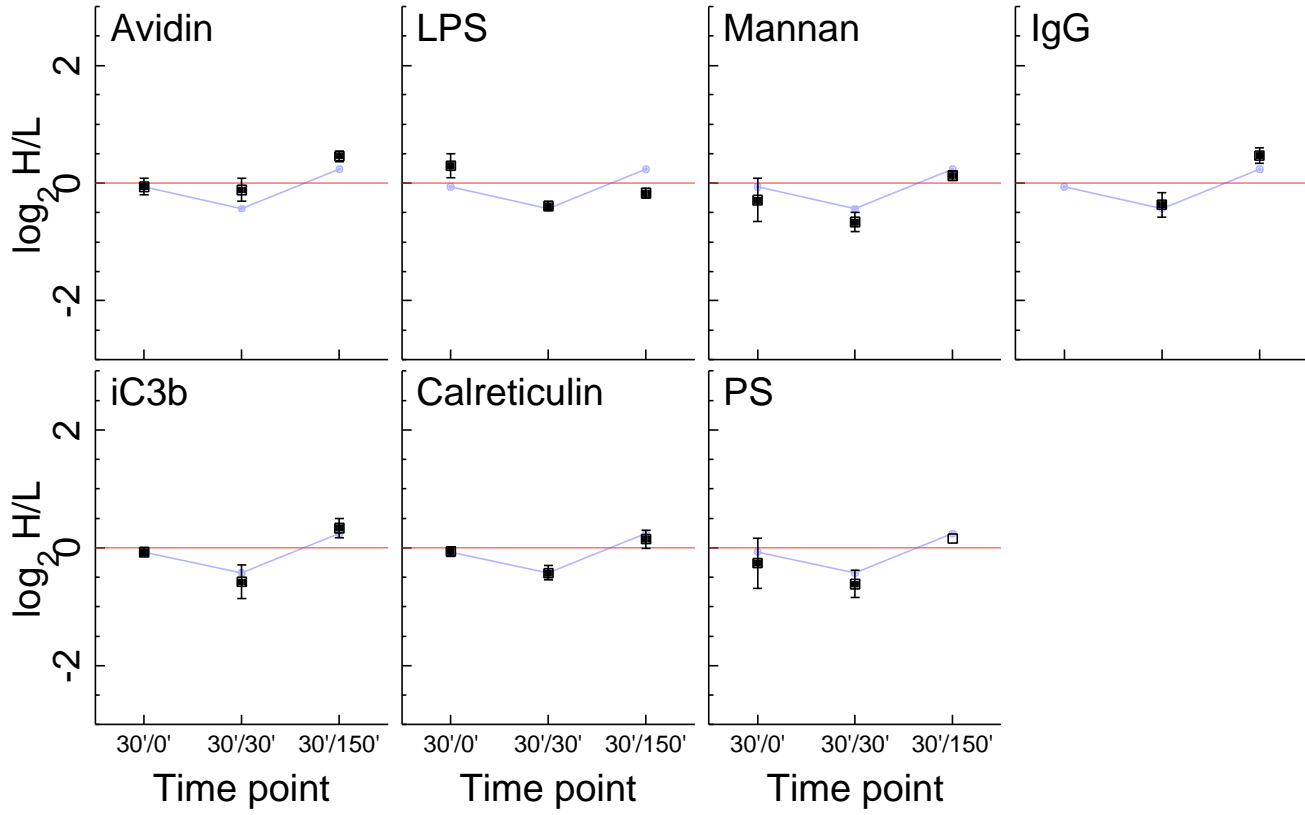

### arl6ip5 (Q8R5J9)

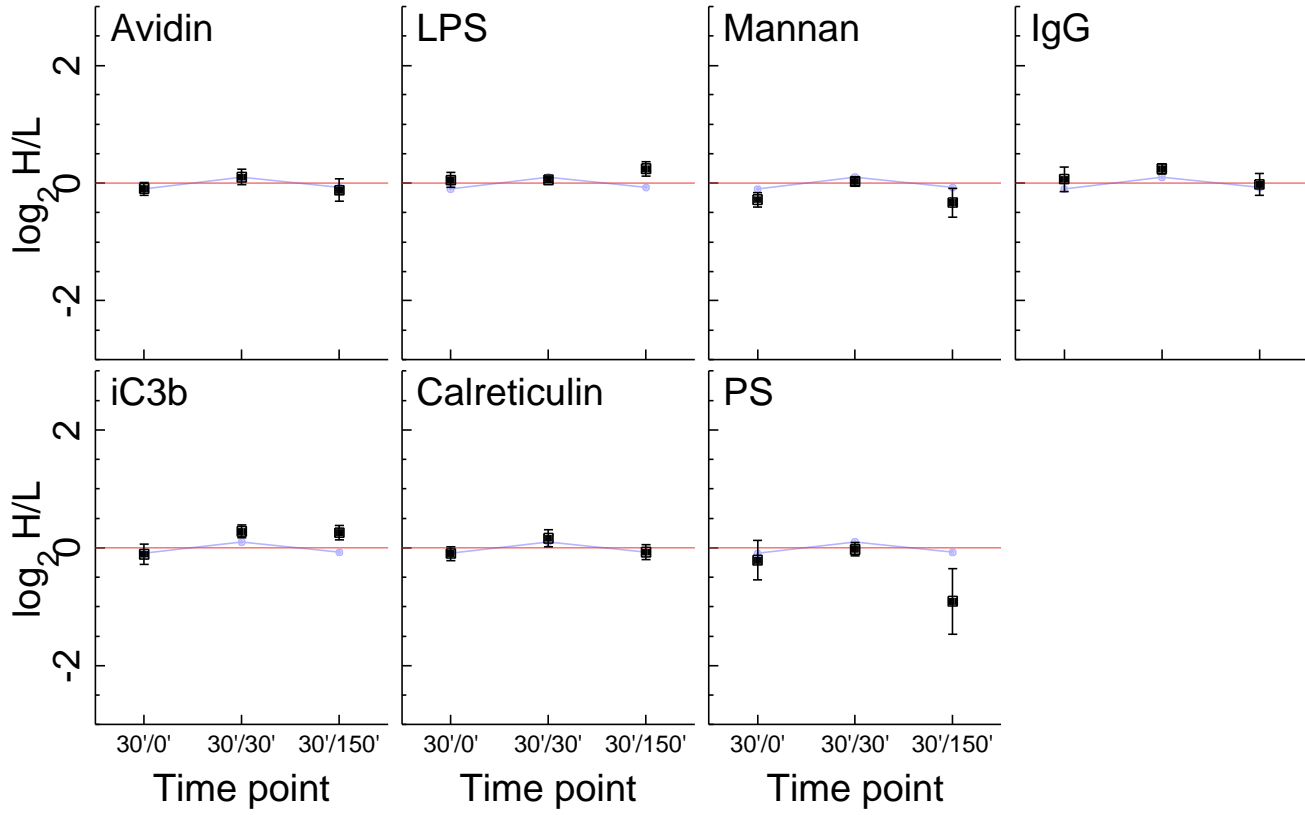

arl8a (Q8VEH3)

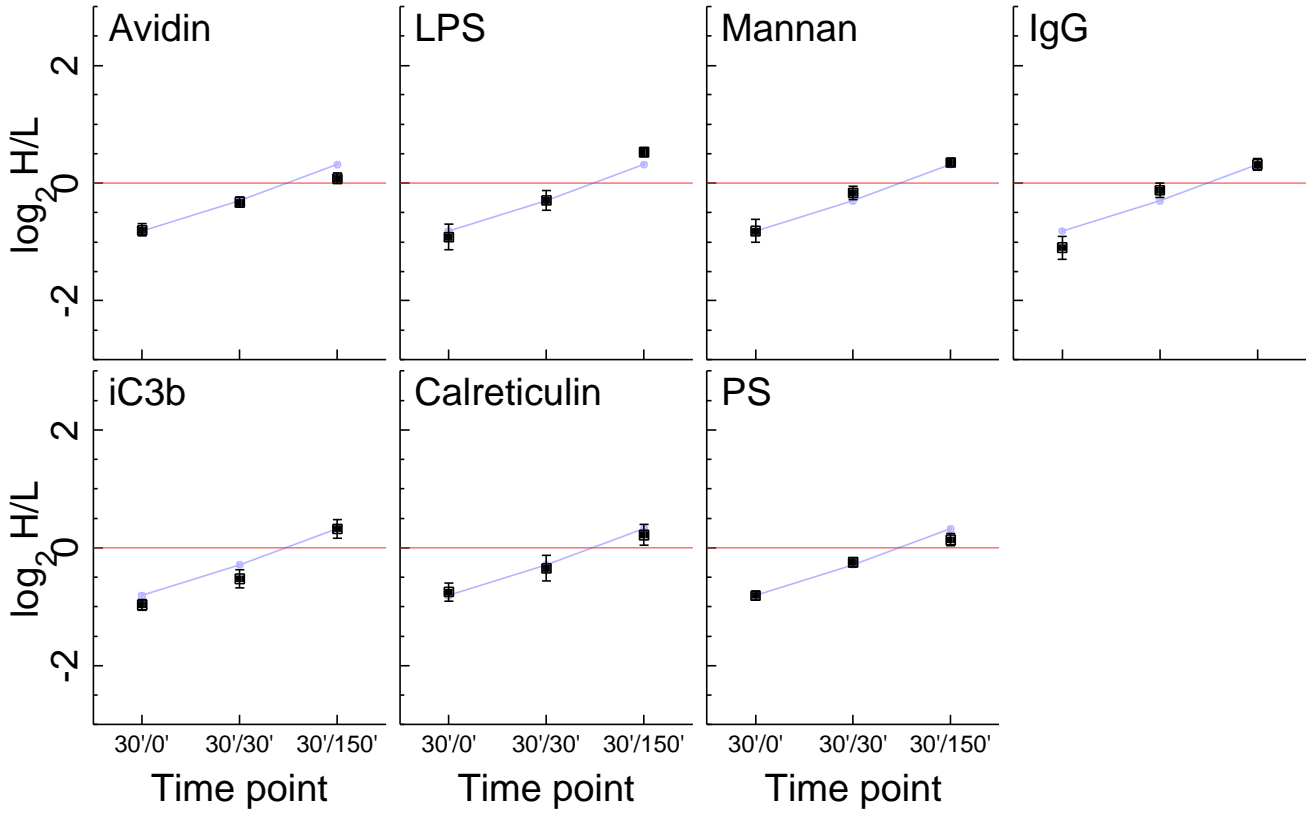

arl8b (Q9CQW2)

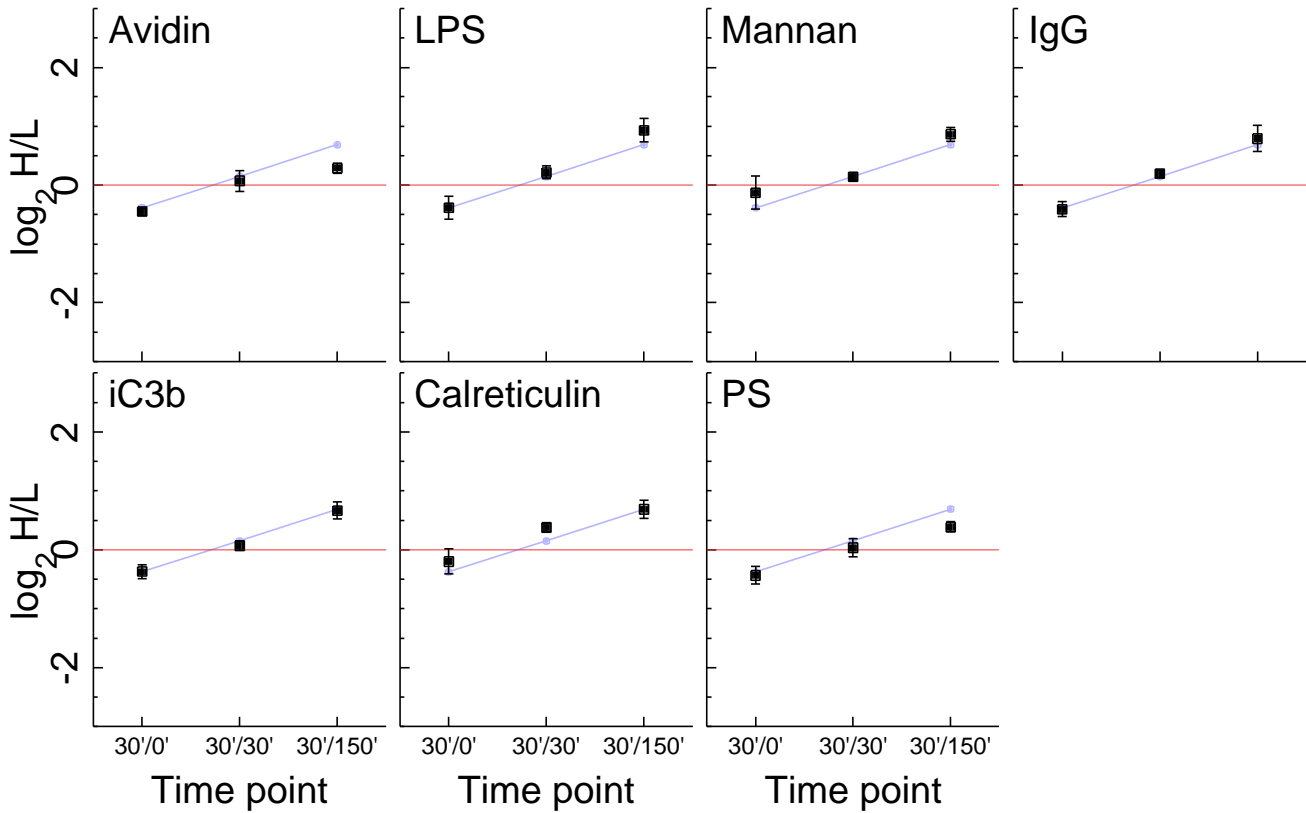



armc10 (Q9D0L7)

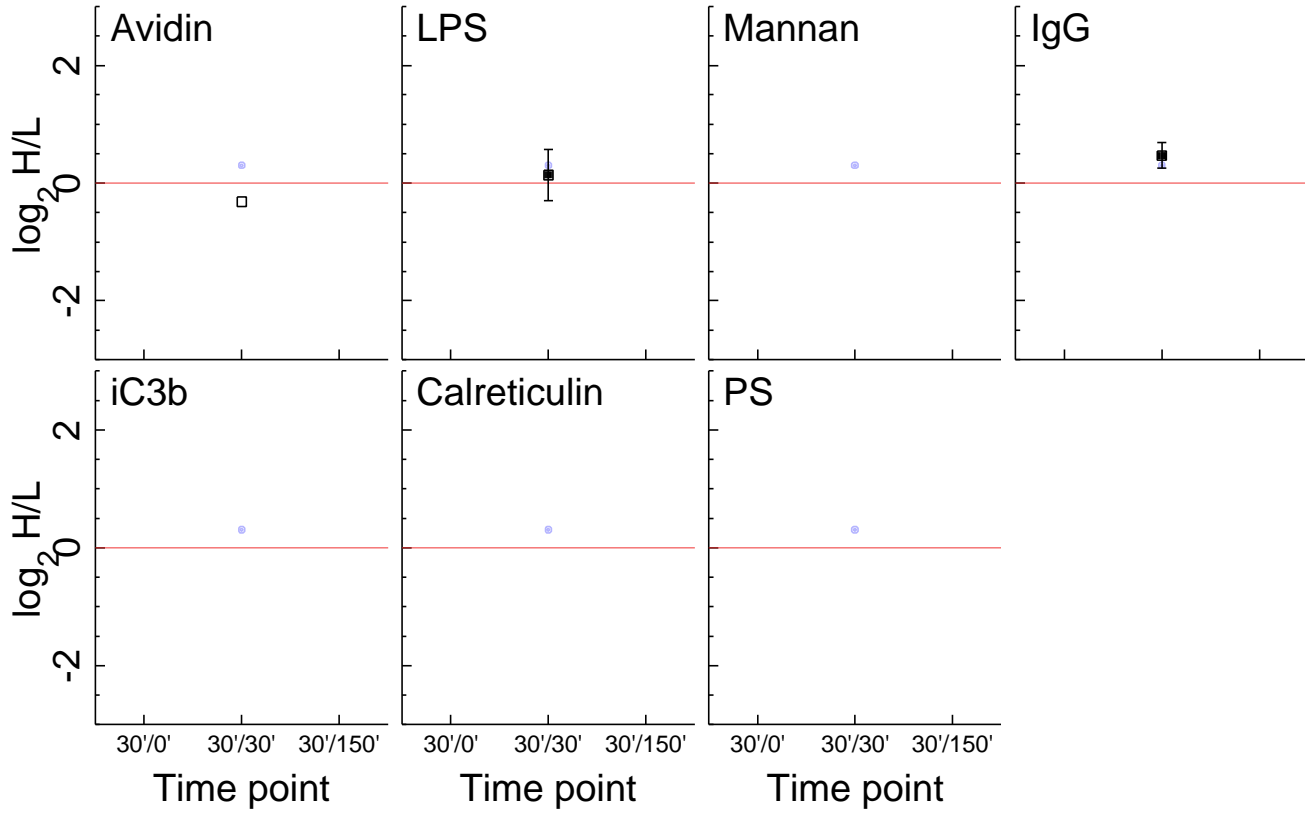

### arpc1b (Q9WV32)

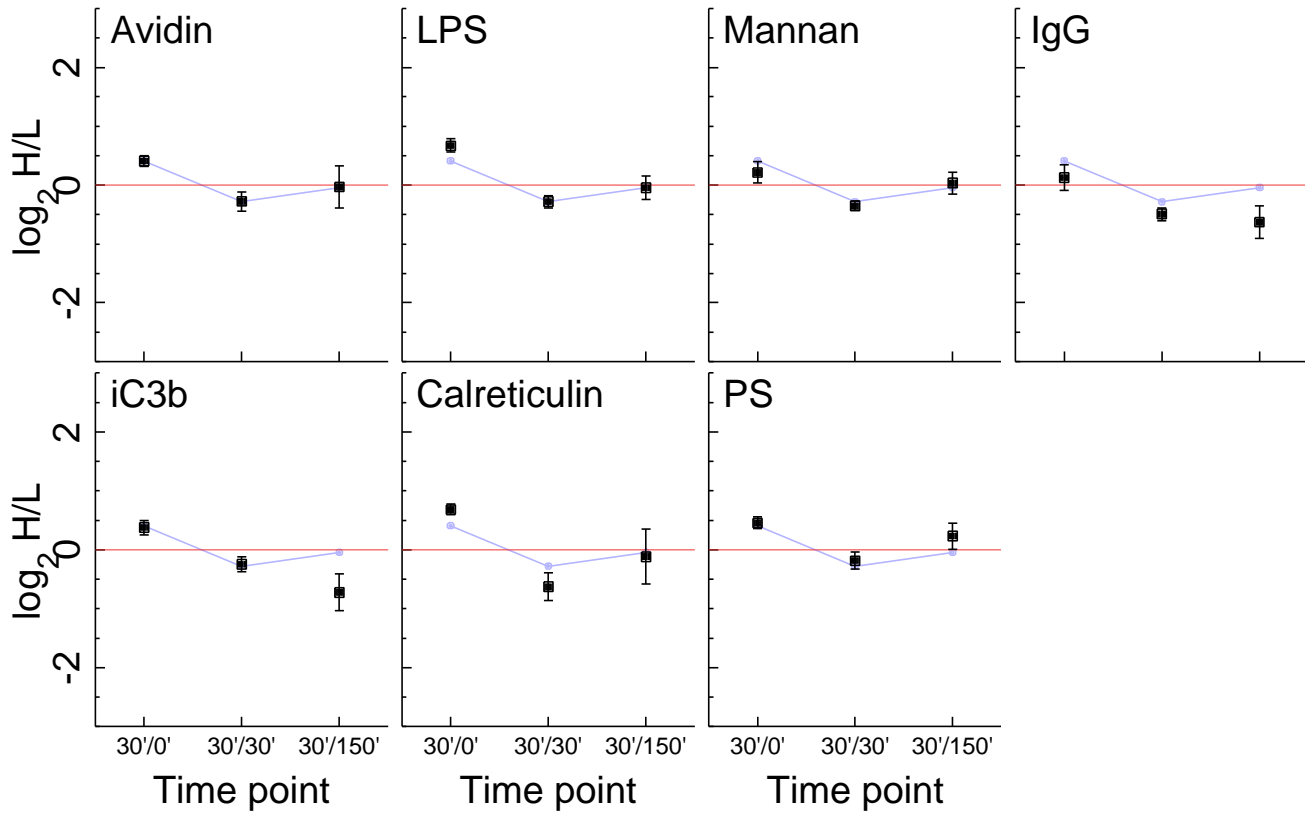

### arpc2 (Q9CVB6)

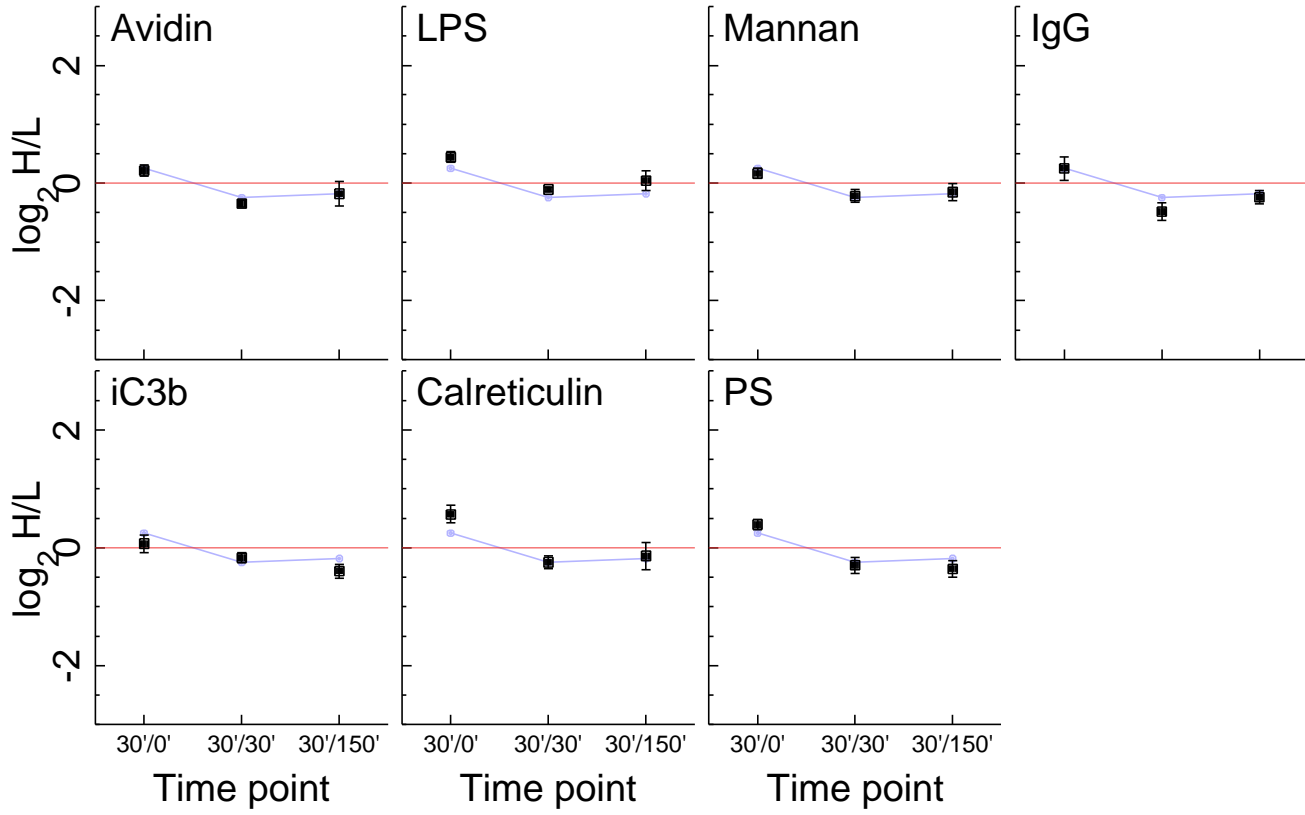

arpc3 (Q9JM76)

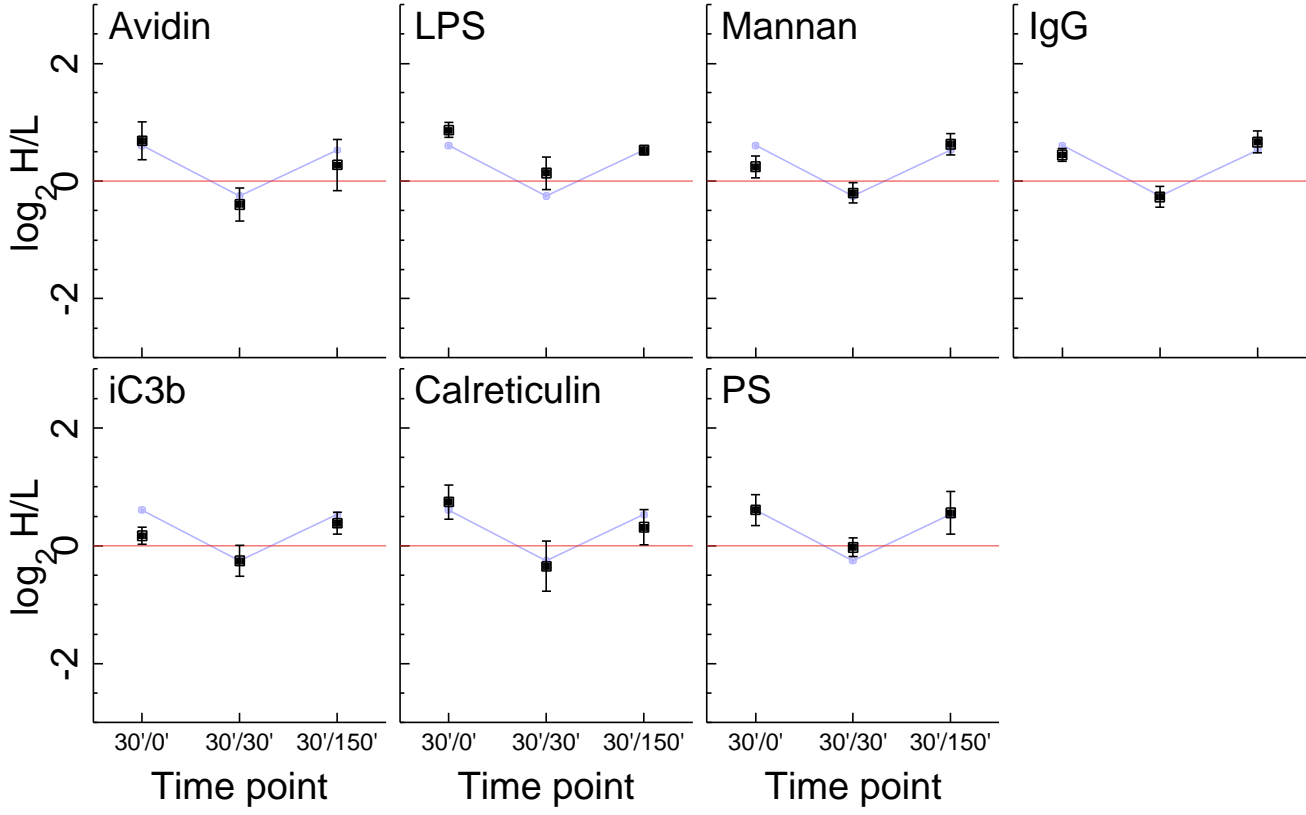

arpc4 (P59999)

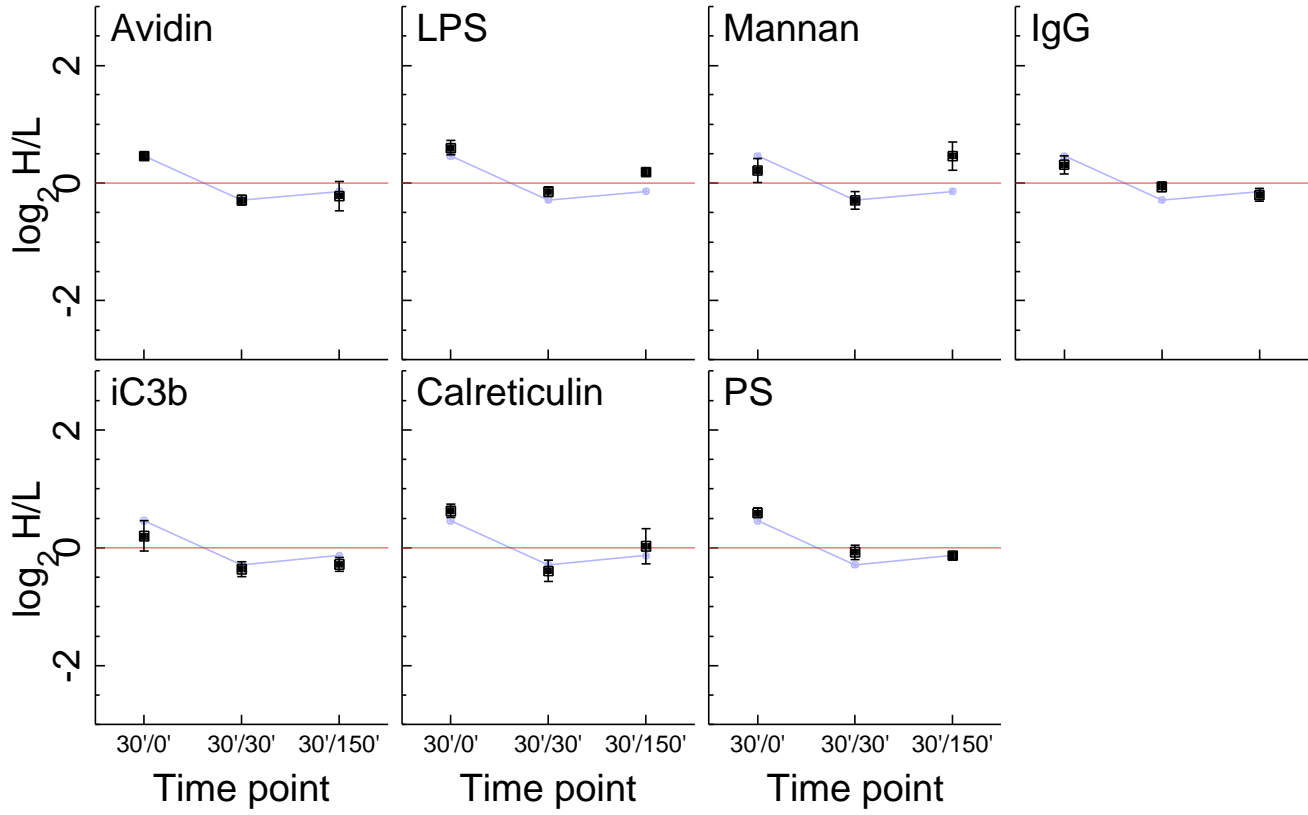

### arpc5 (Q9CPW4)

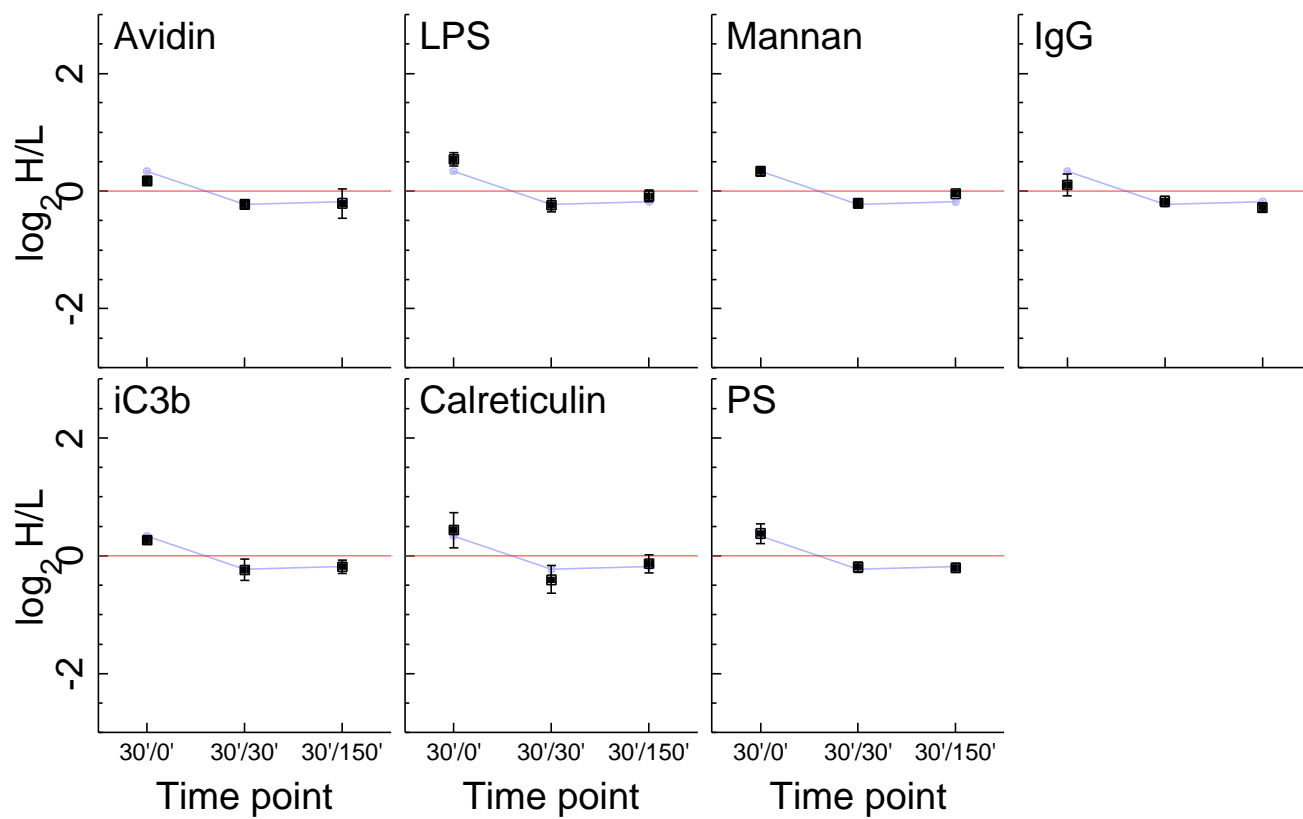

arpp19 (E9Q827)

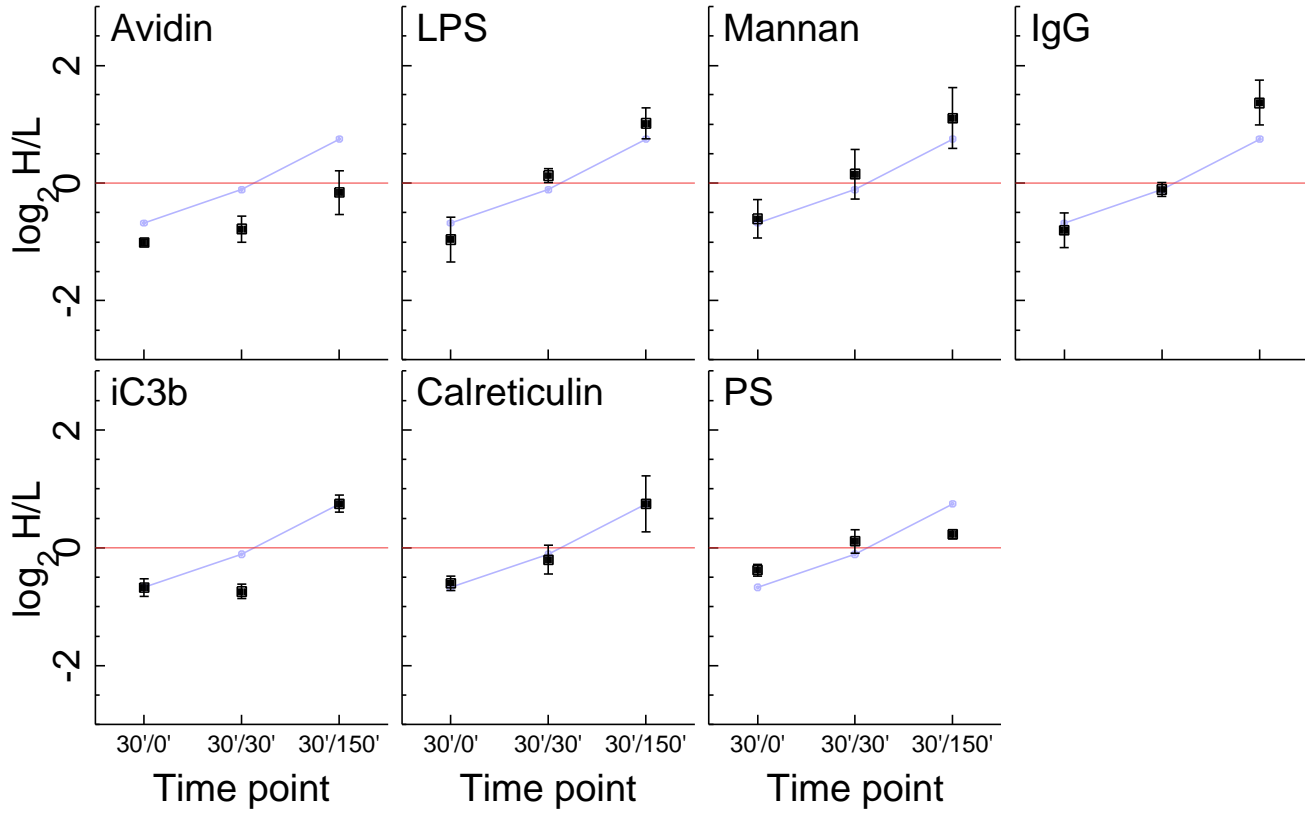

### arrb2 (Q91YI4)

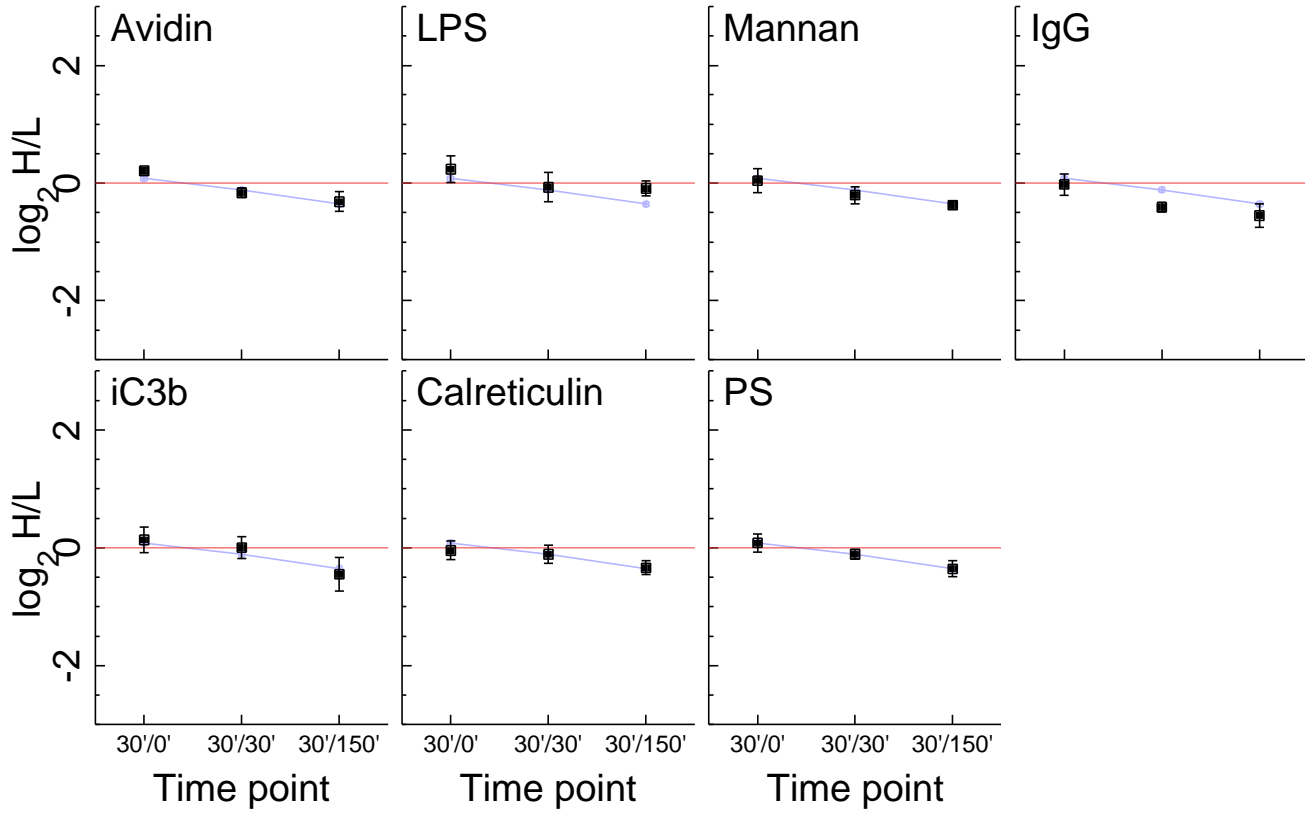



arsa (P50428)

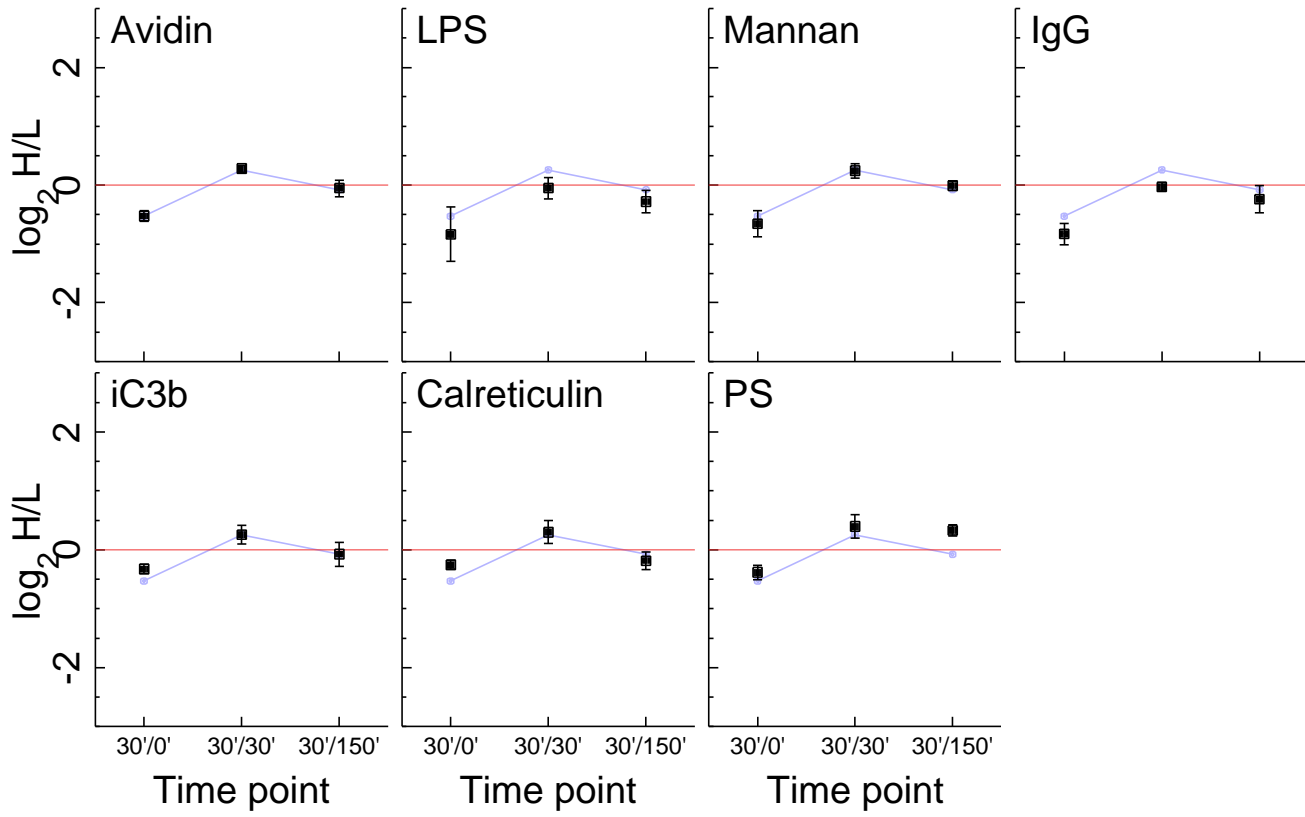

arsb (P50429)

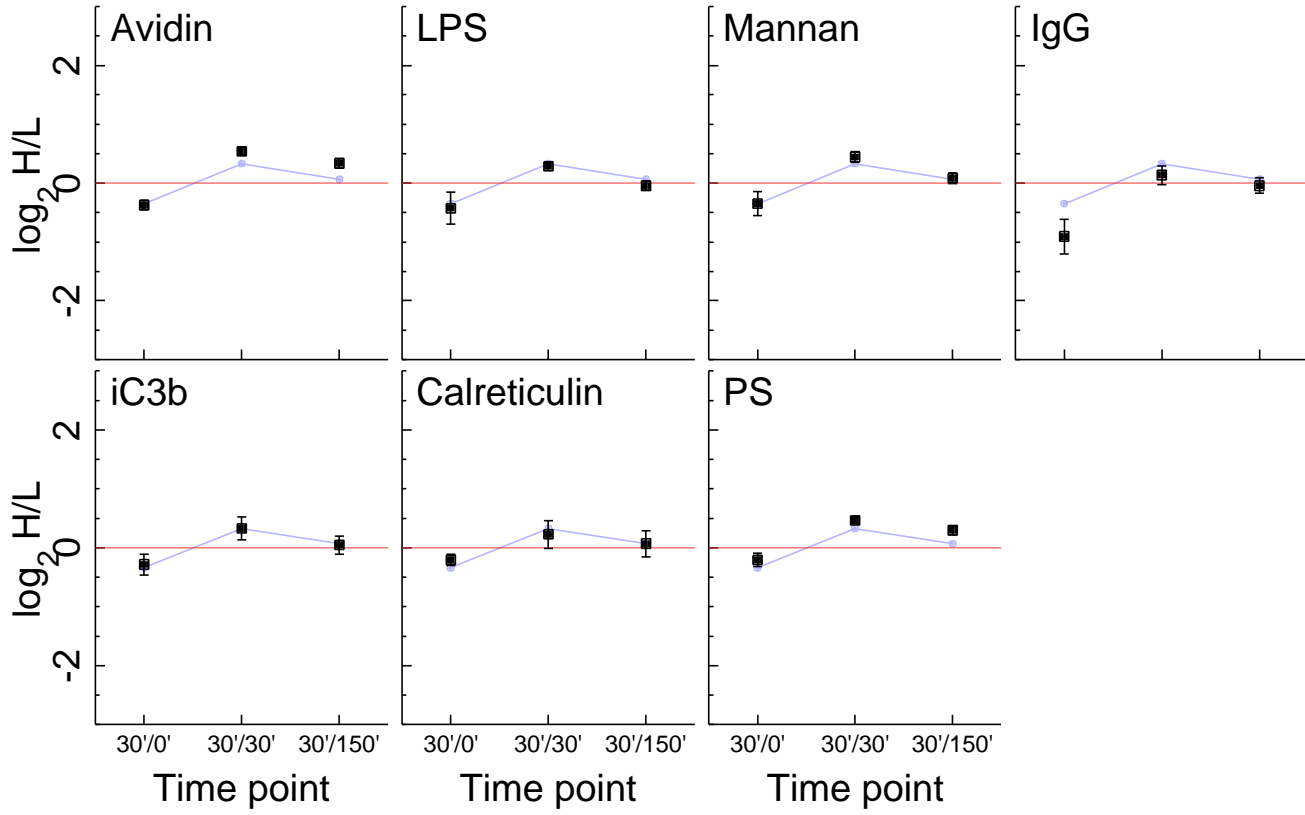

arsk (Q9D2L1)

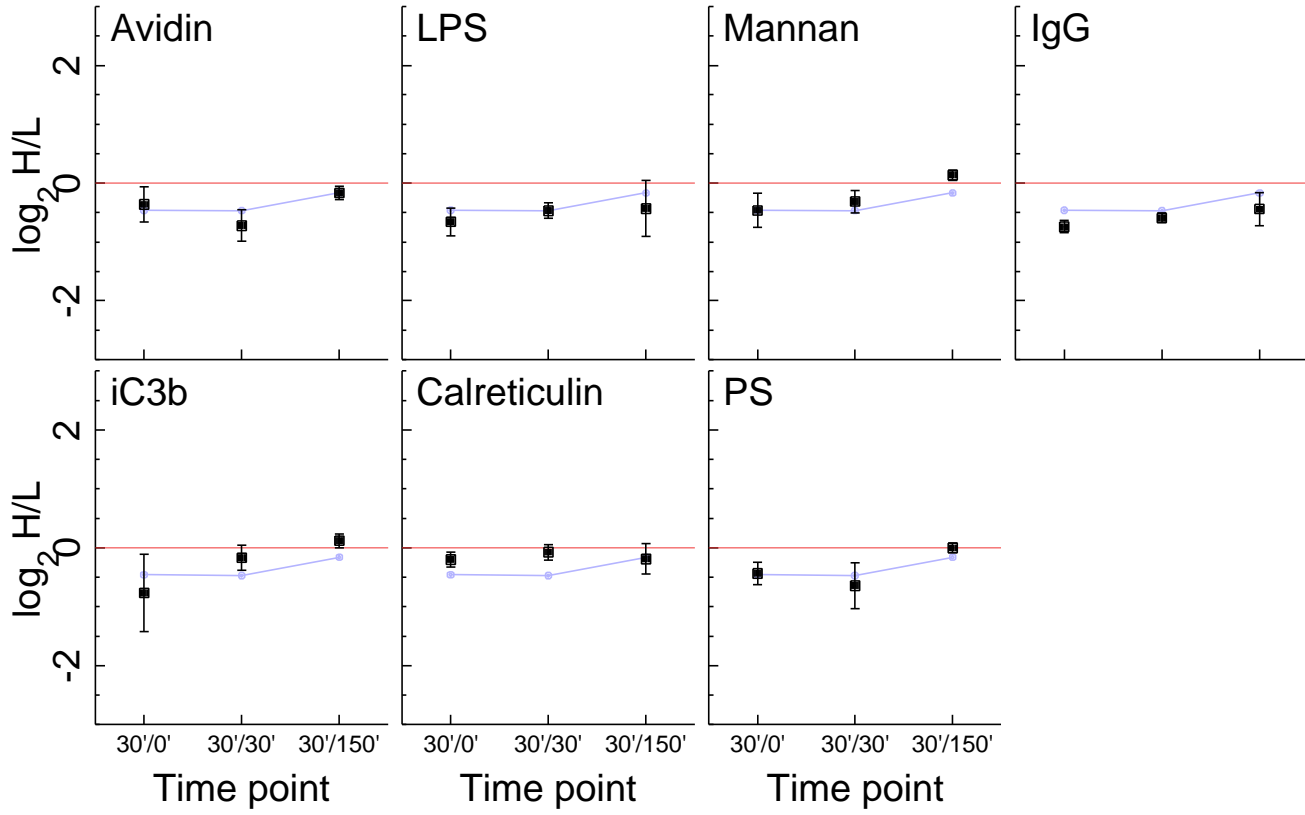

asah1 (Q9WV54)

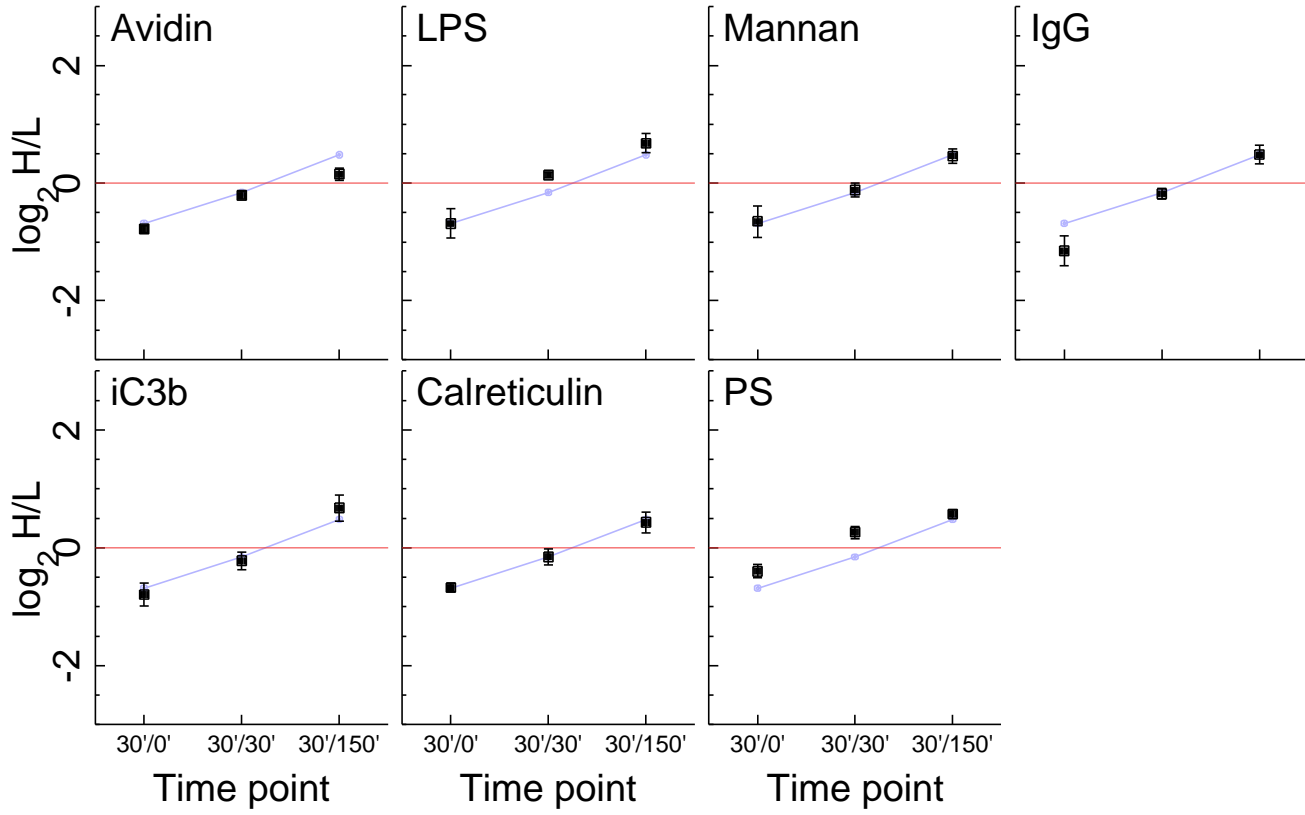

asah2 (Q9JHE3)

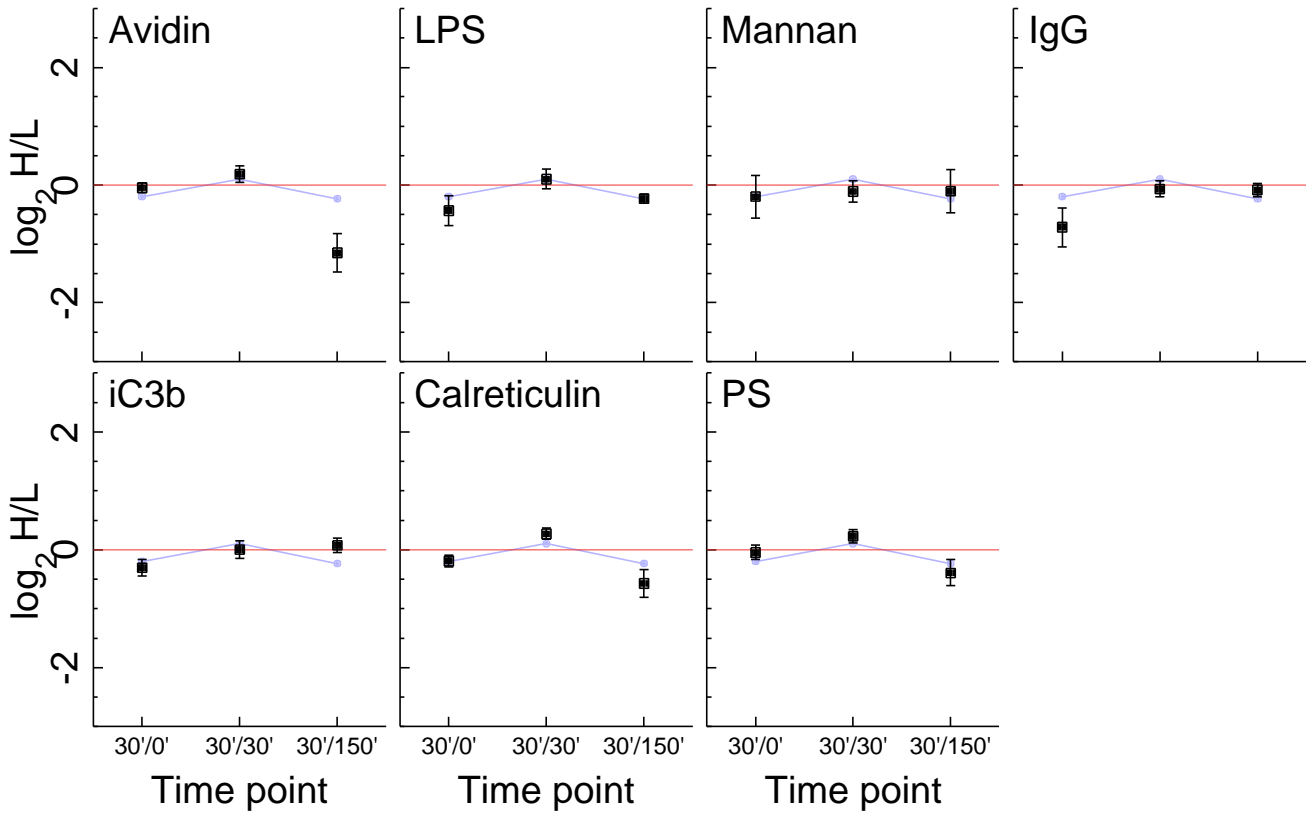

### asph (Q8BSY0)

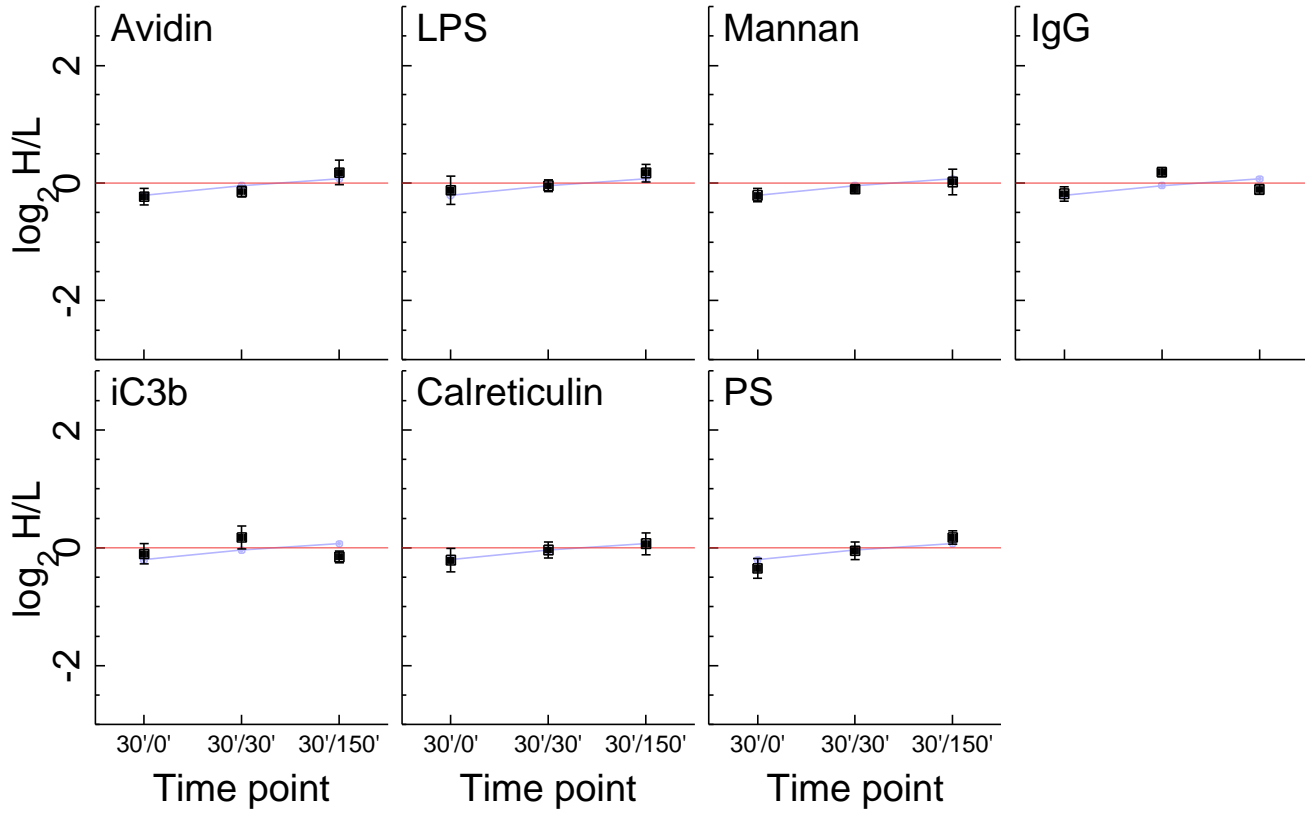

ass1 (P16460)

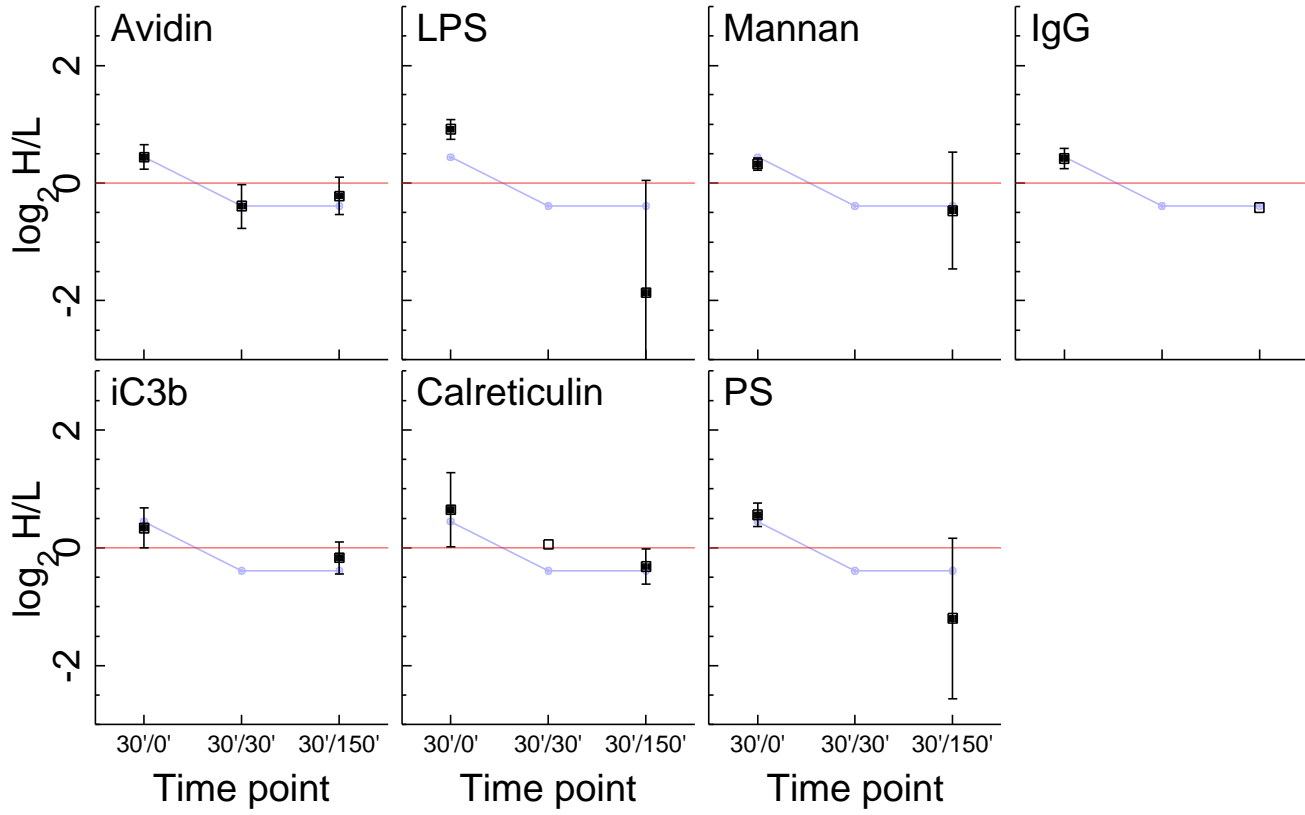

atad1 (Q9D5T0)

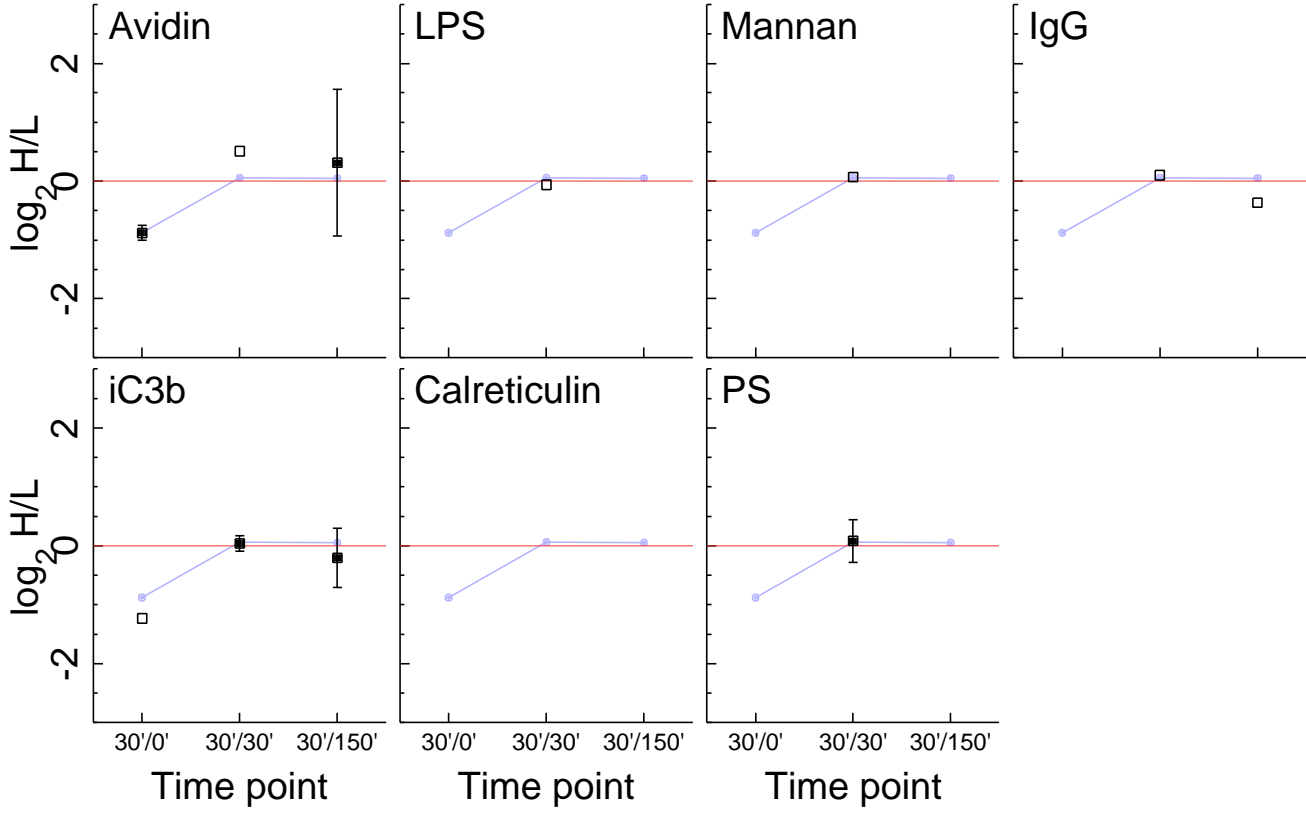



### atl3 (Q91YH5)

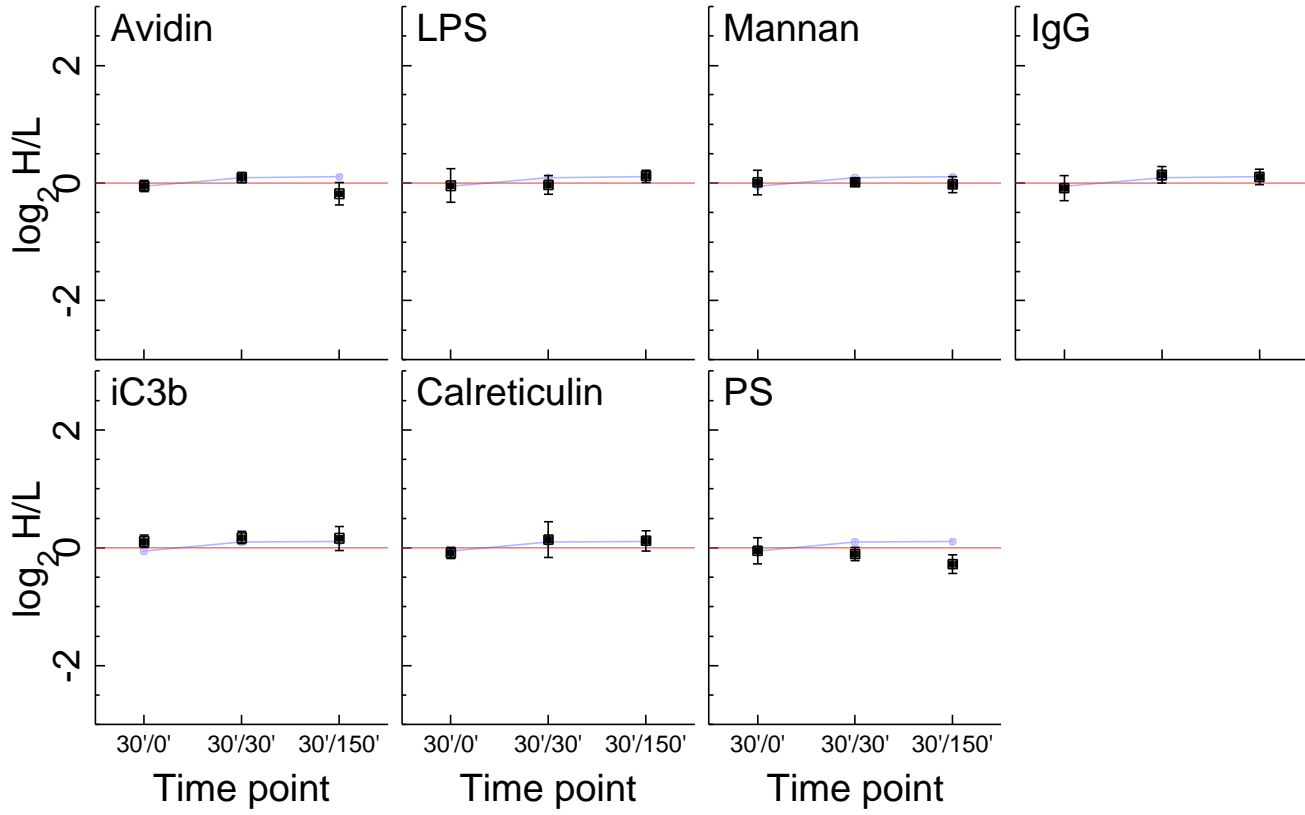

### atp11a (E9Q3G7)

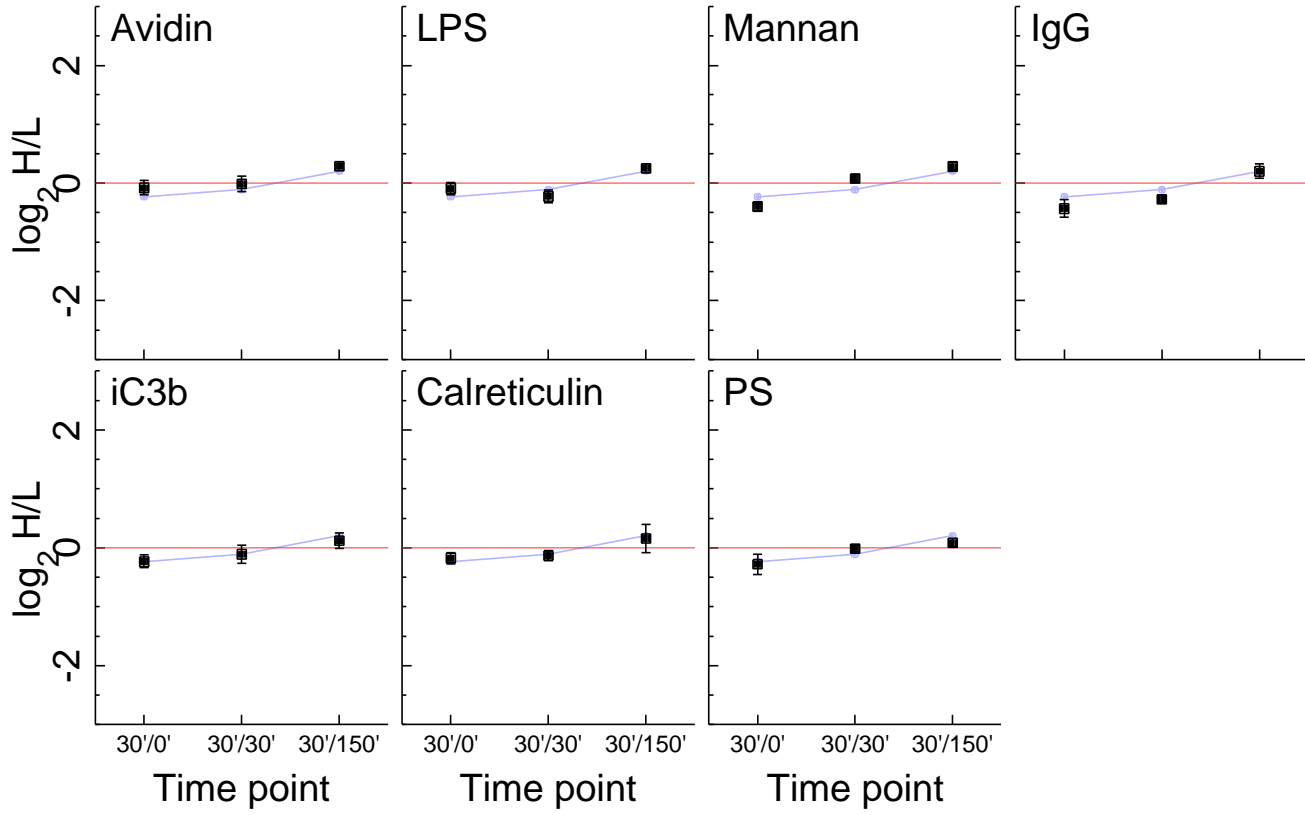

### atp11c (F6Q8D3)

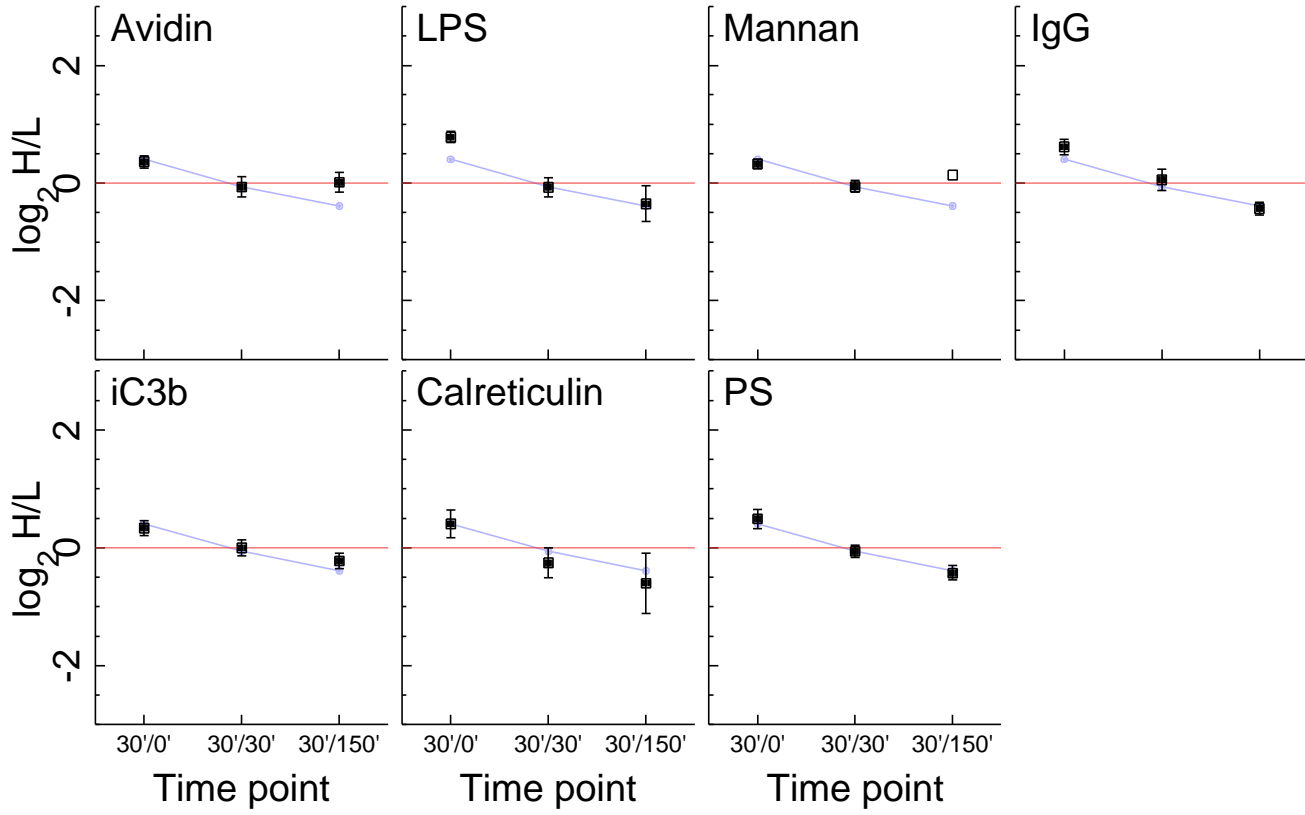

### atp13a2 (Q9CTG6)

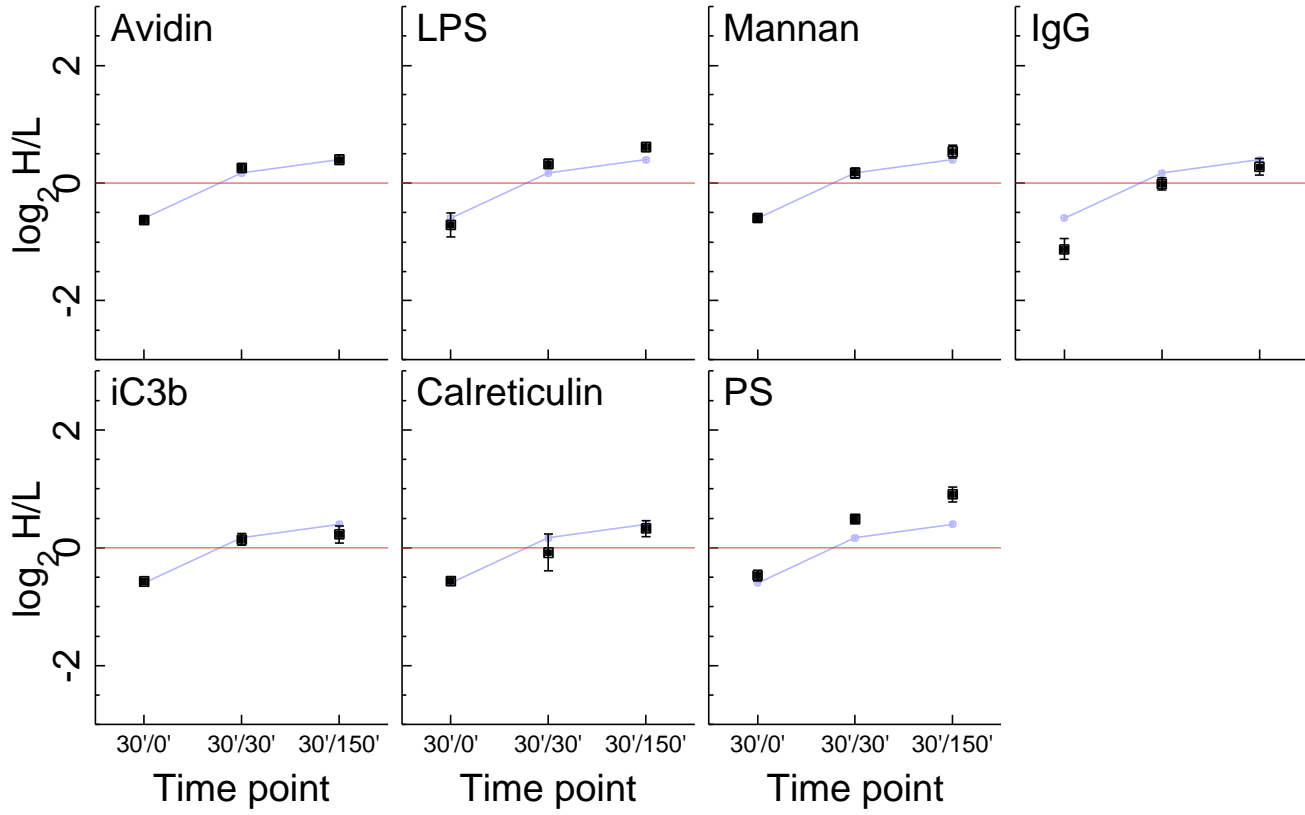

### atp1a1 (Q8VDN2)

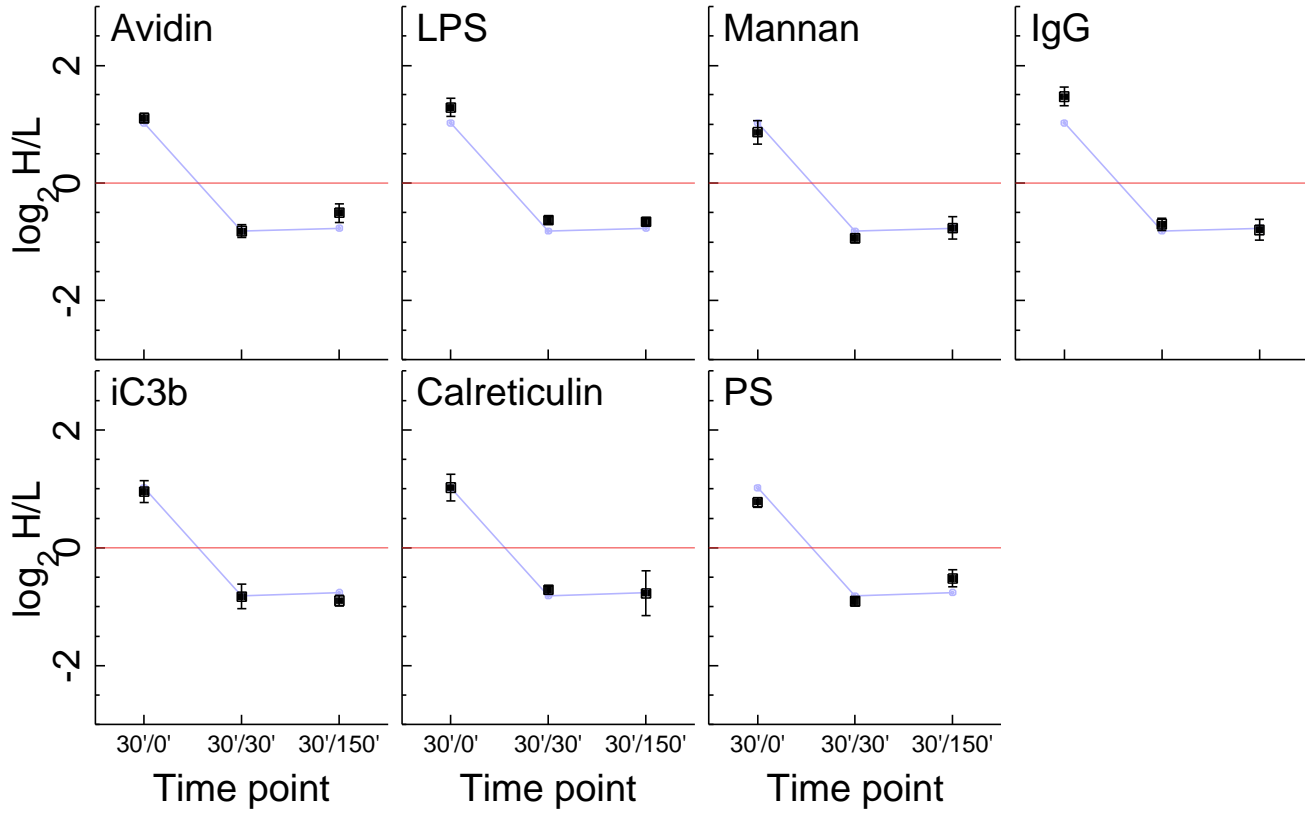

### atp1a3 (Q8VCE0)

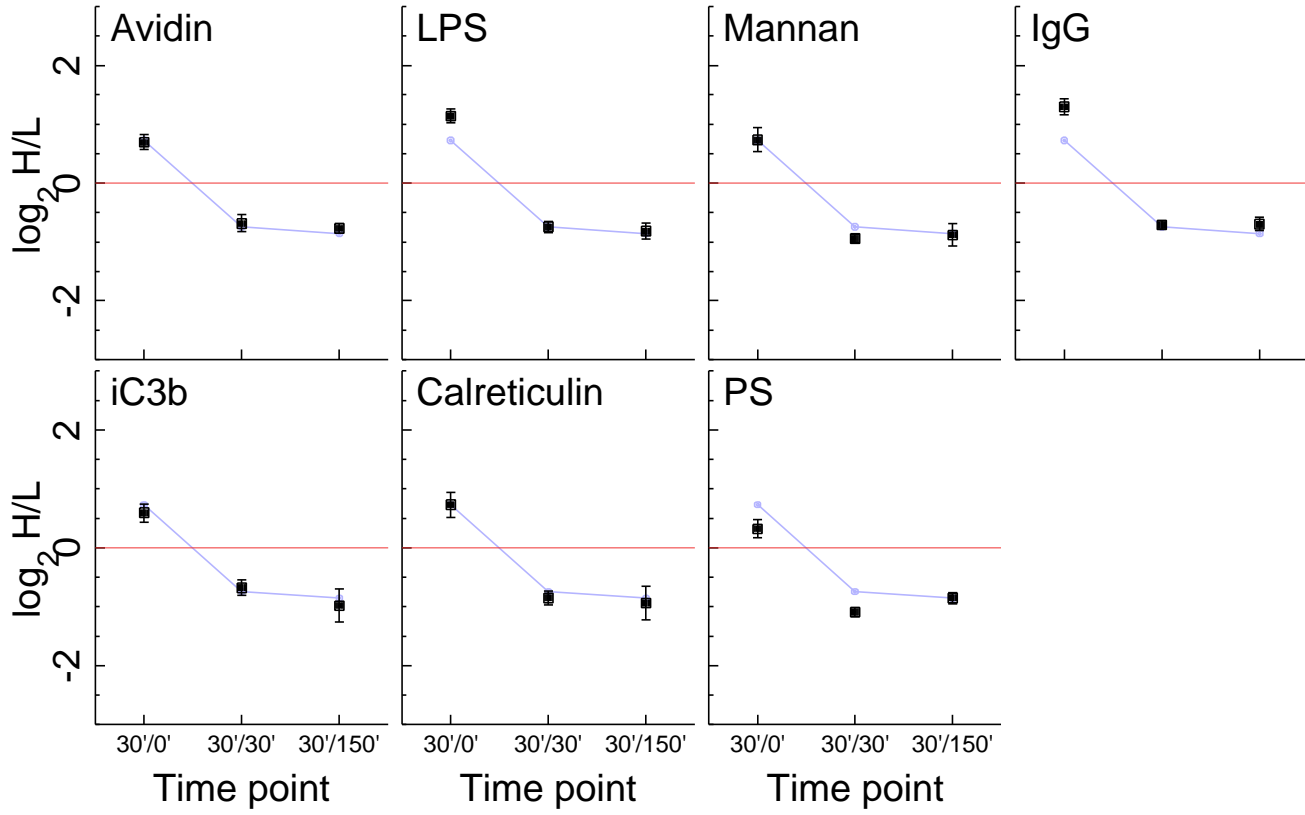

atp1b3 (P97370)

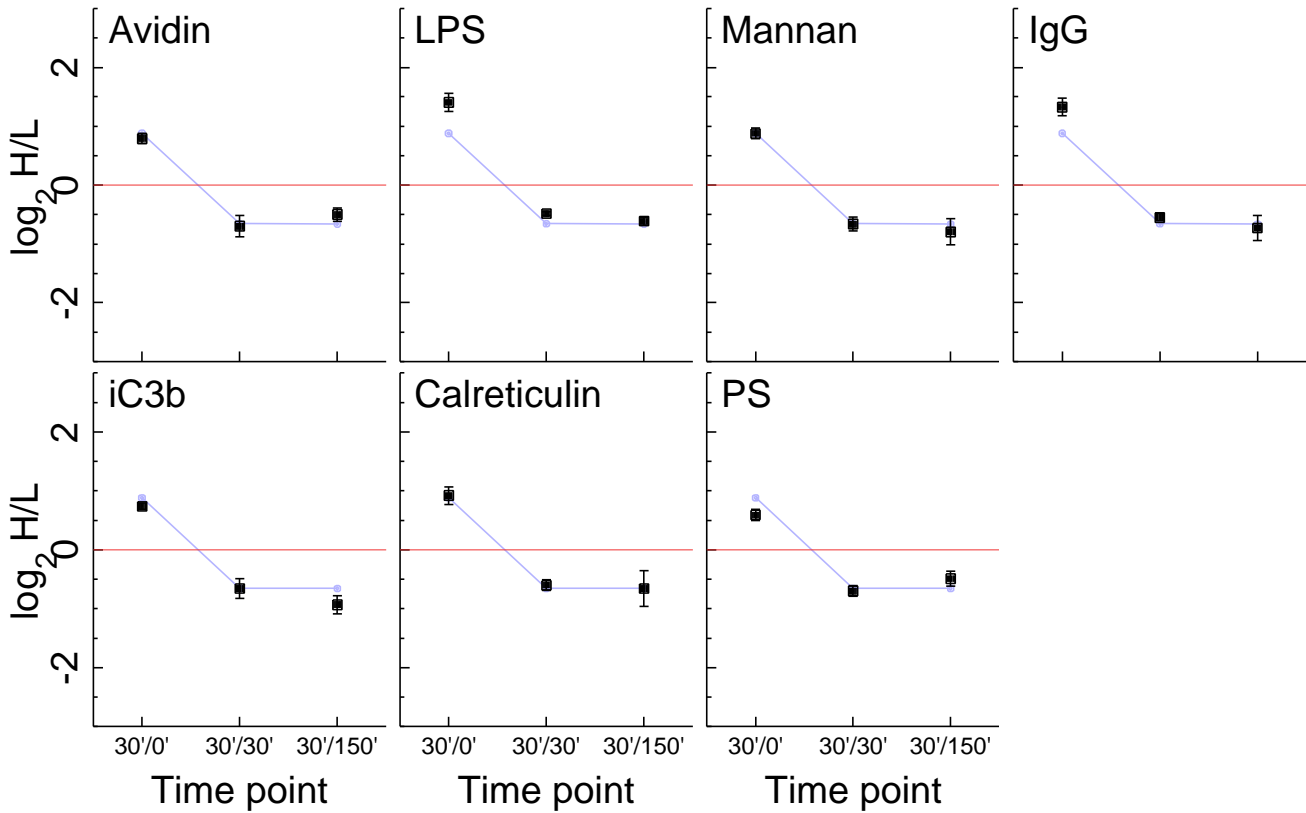

atp2a2 (O55143)

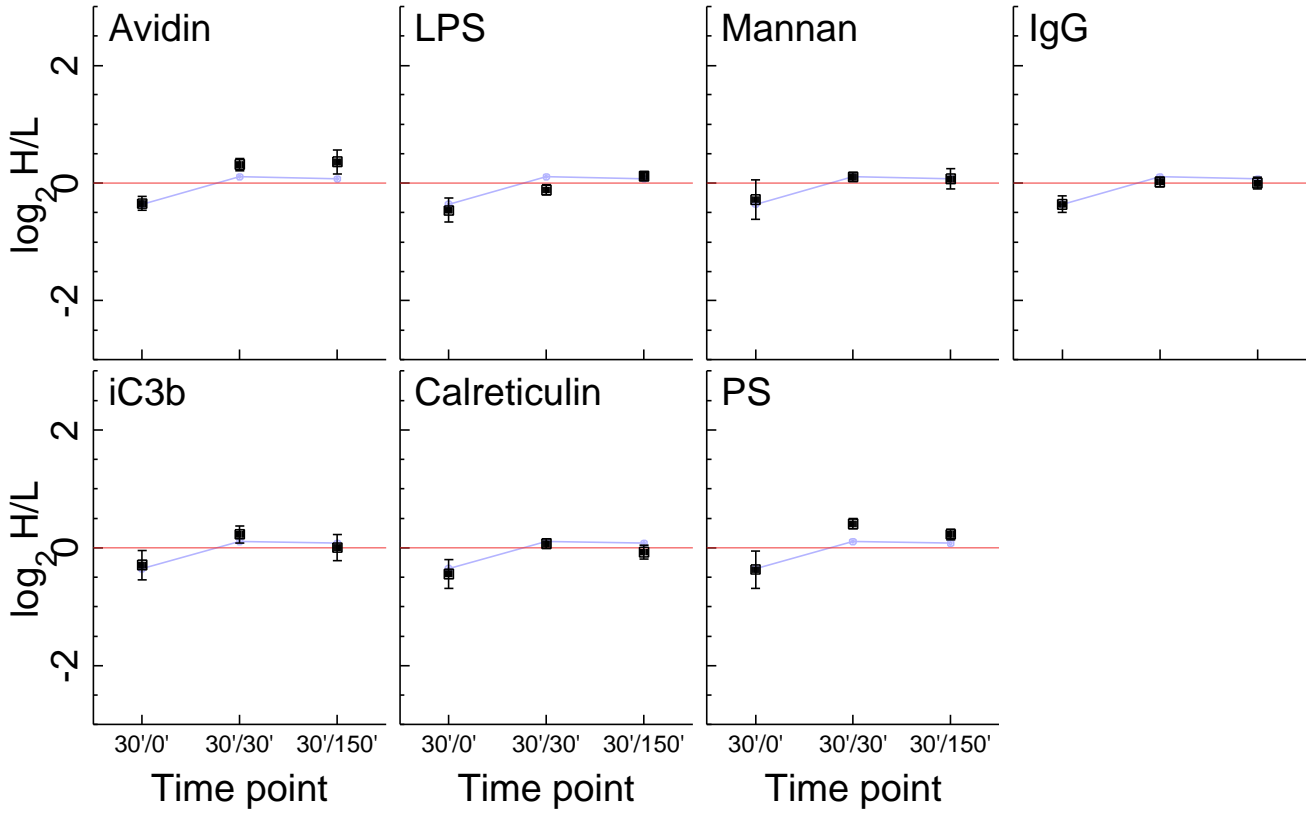



atp2a3 (Q64518)

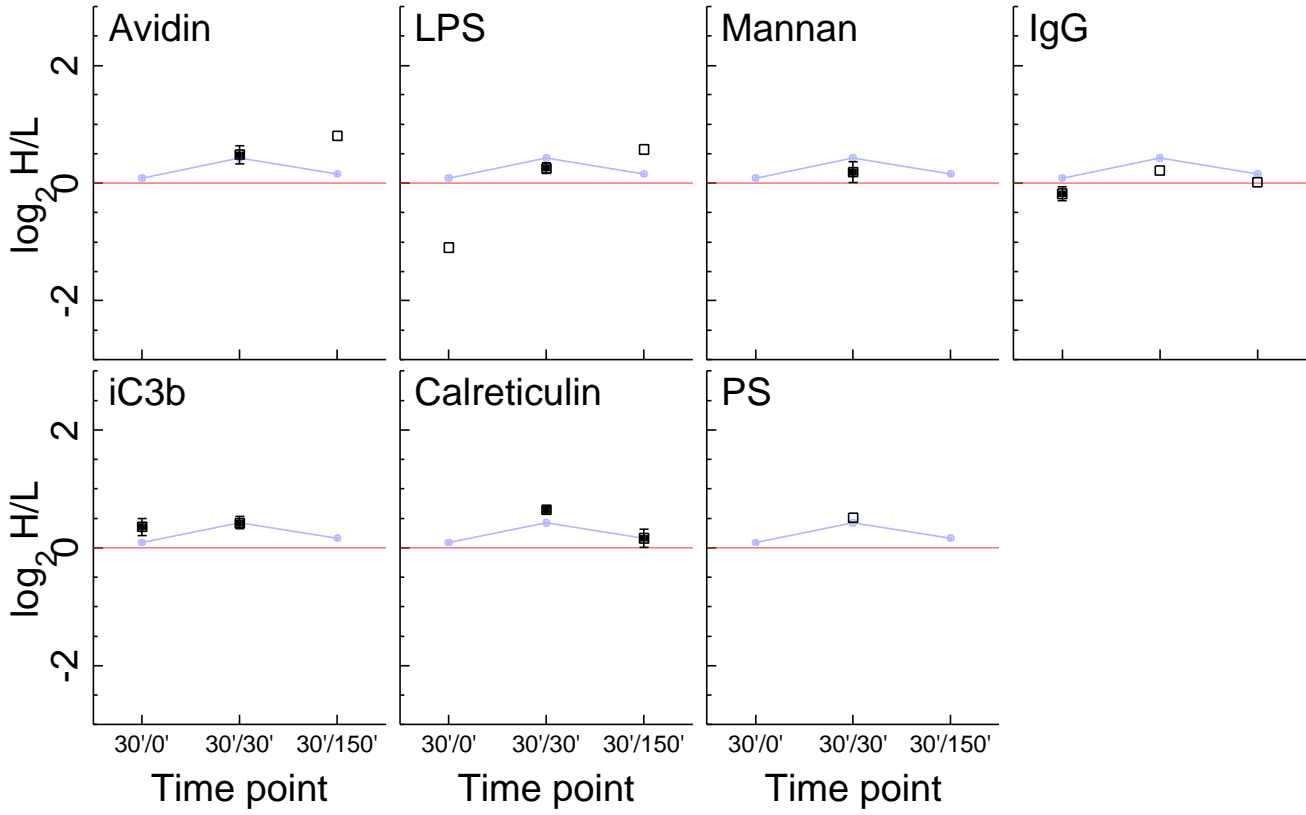

### atp2b1 (G5E829)

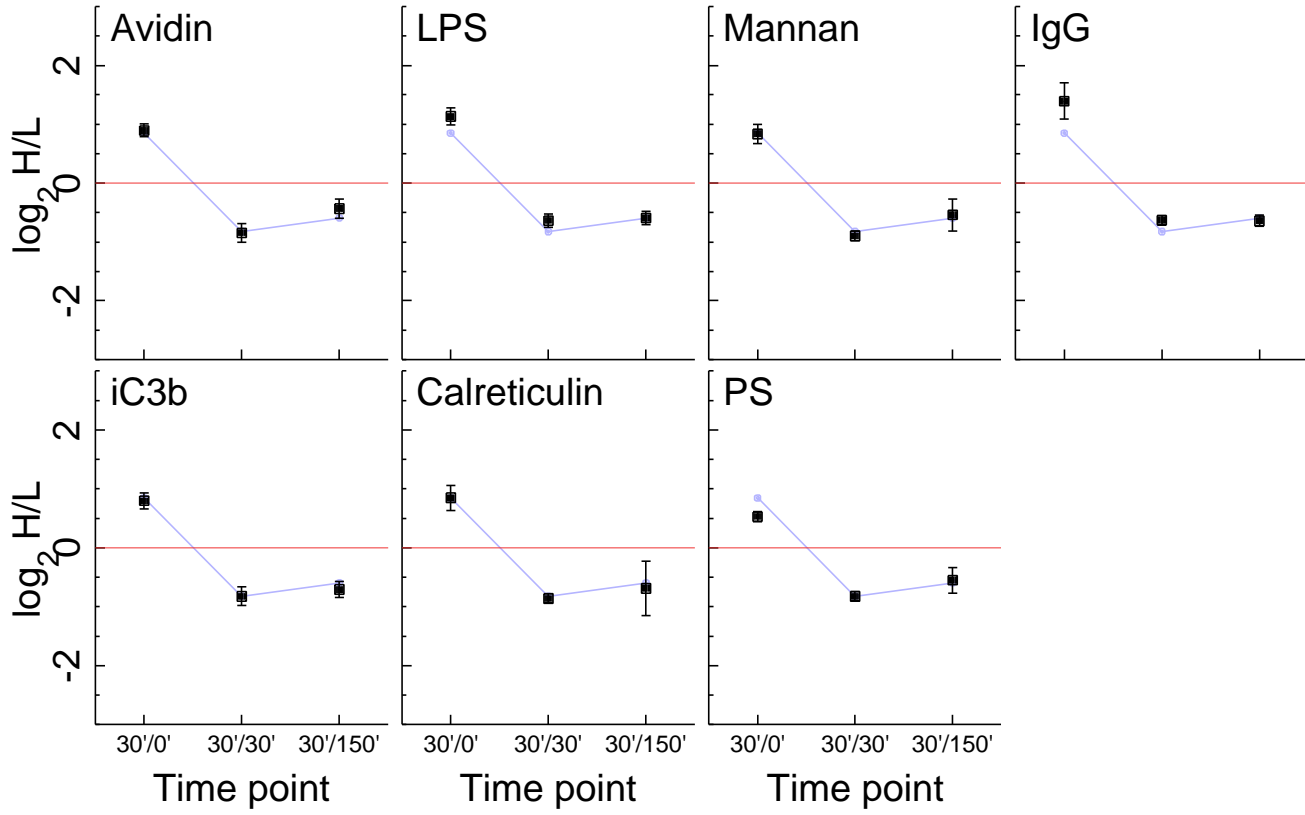

### atp2b3 (Q0VF55)

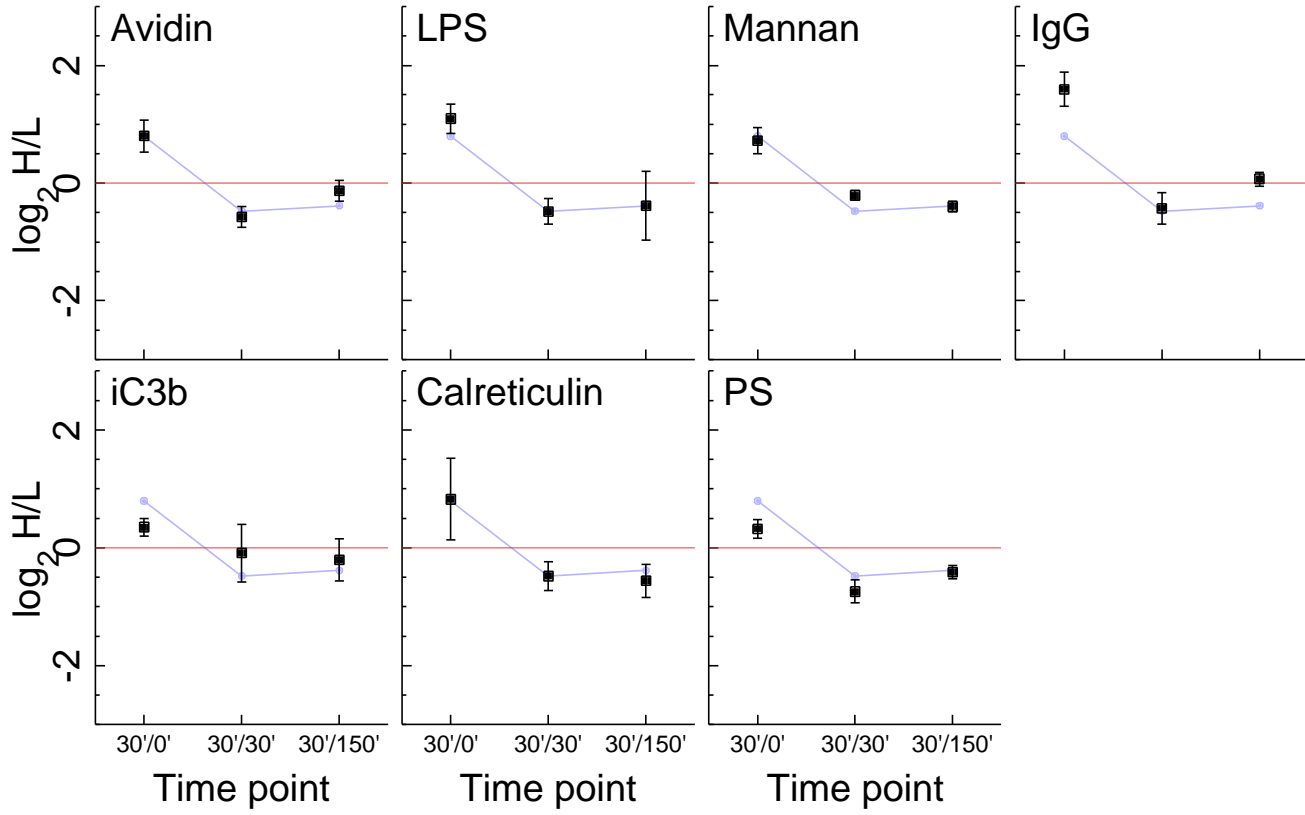

atp5a1 (Q03265)

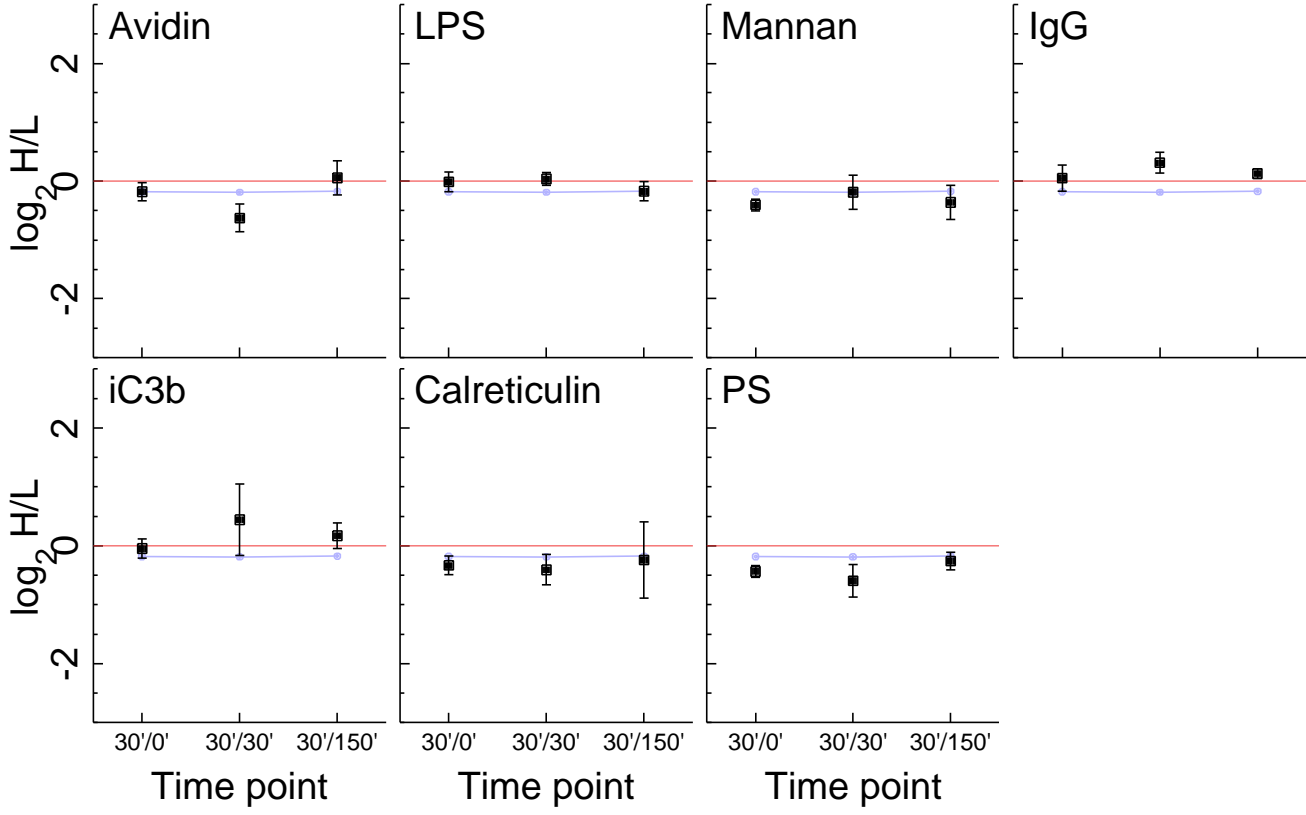

atp5b (P56480)

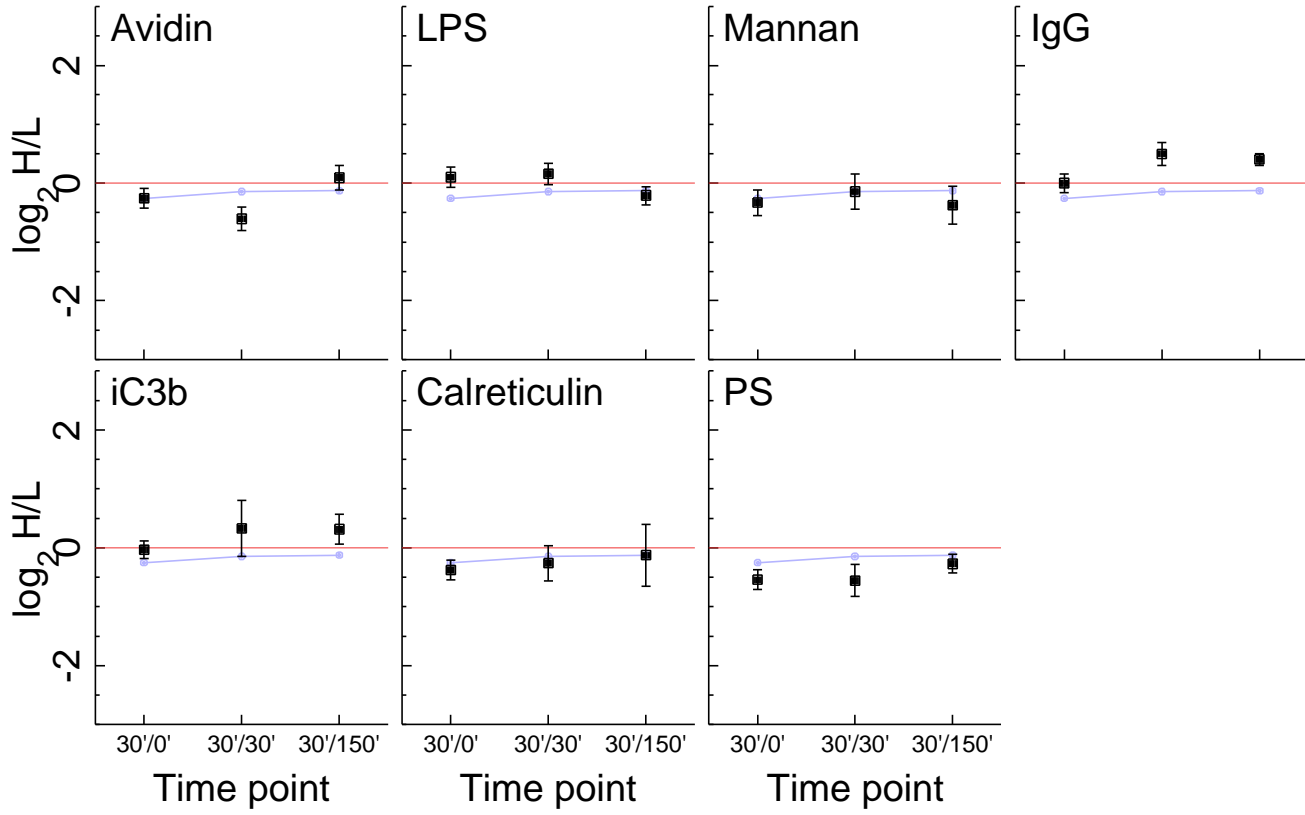

atp5c1 (Q91VR2)

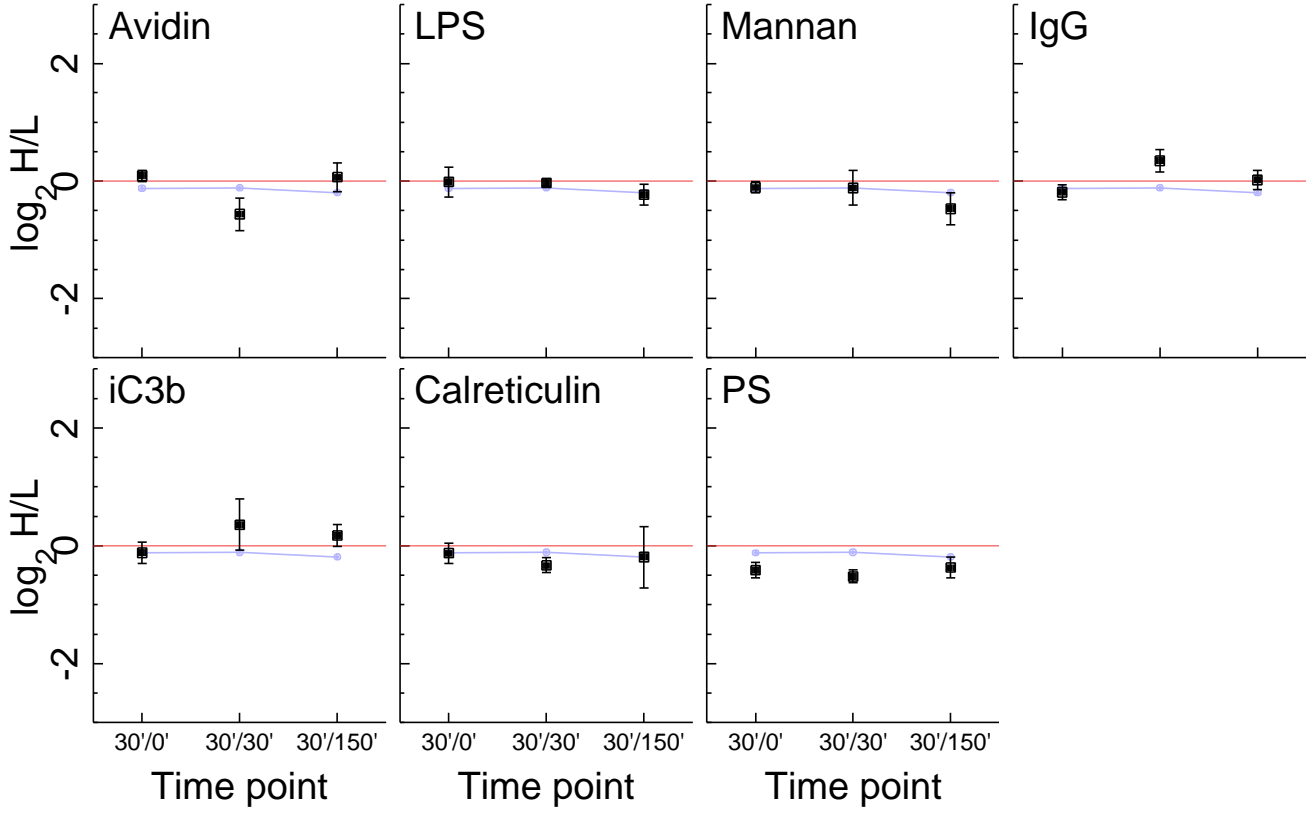

atp5d (Q9D3D9)

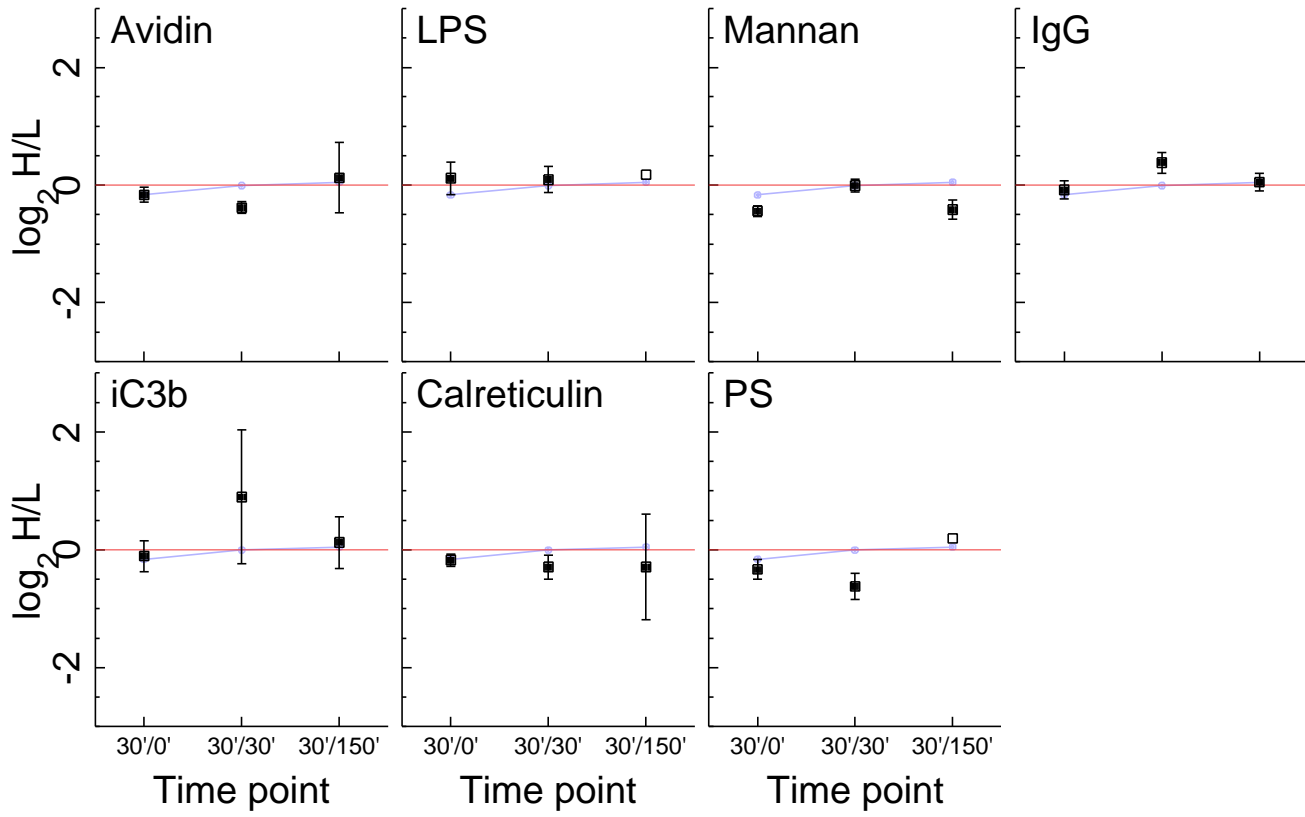

### atp5f1 (Q9CQQ7)

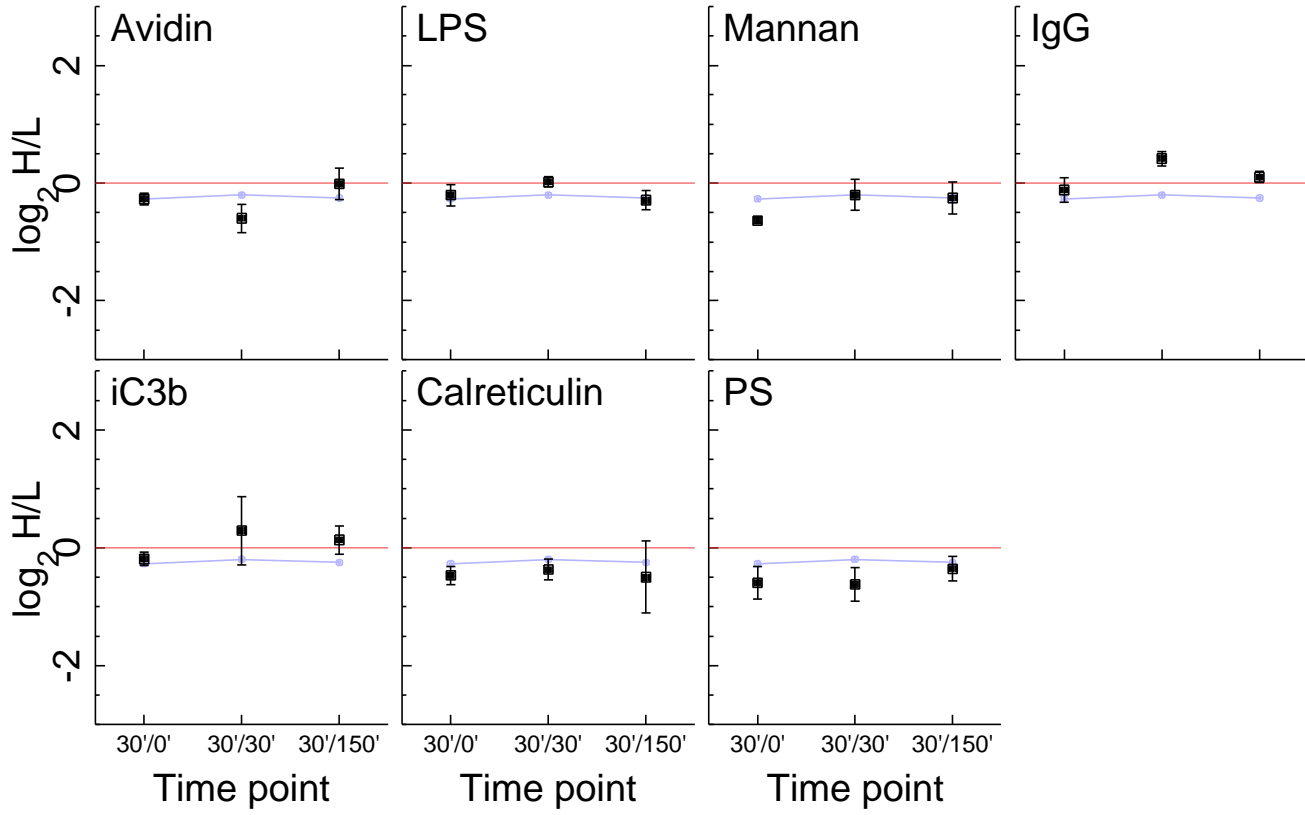



atp5h (Q9DCX2)

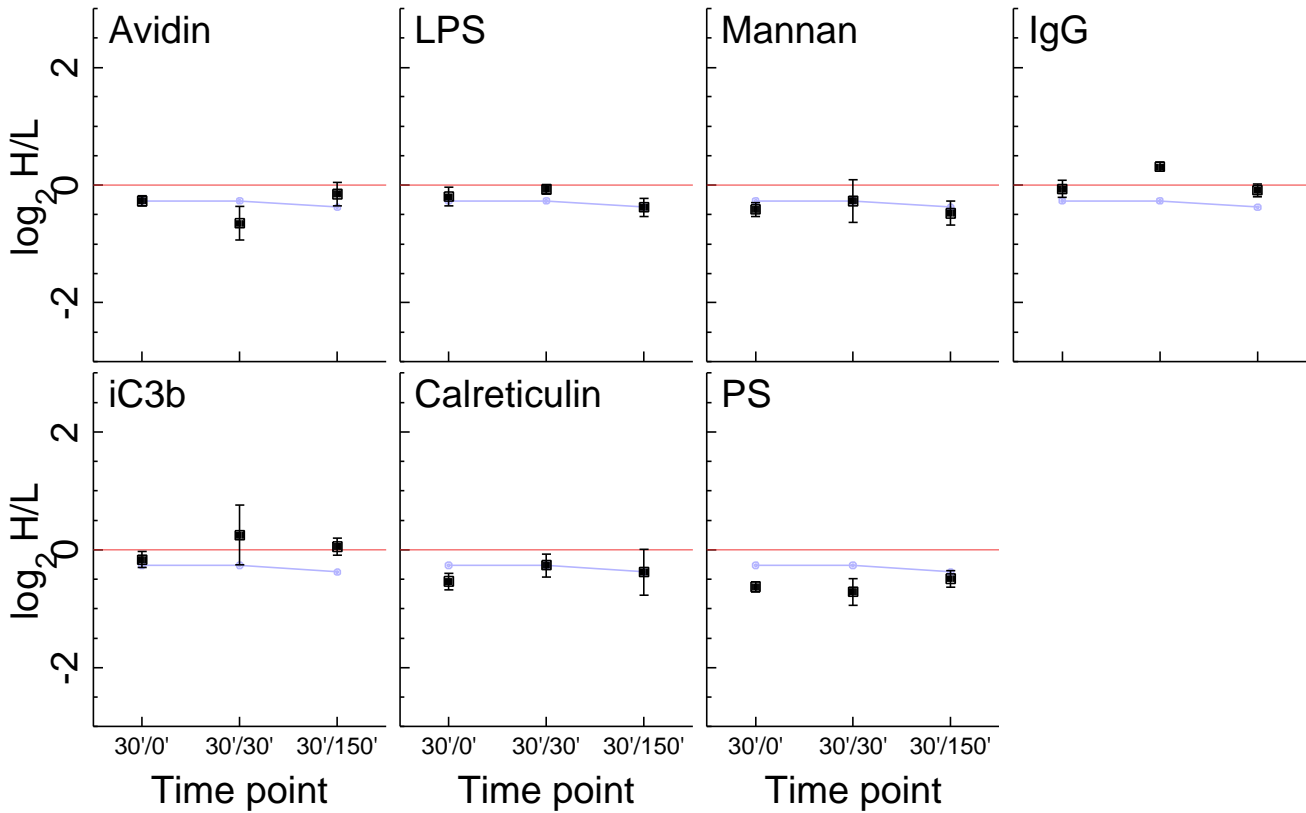

atp5i (Q06185)

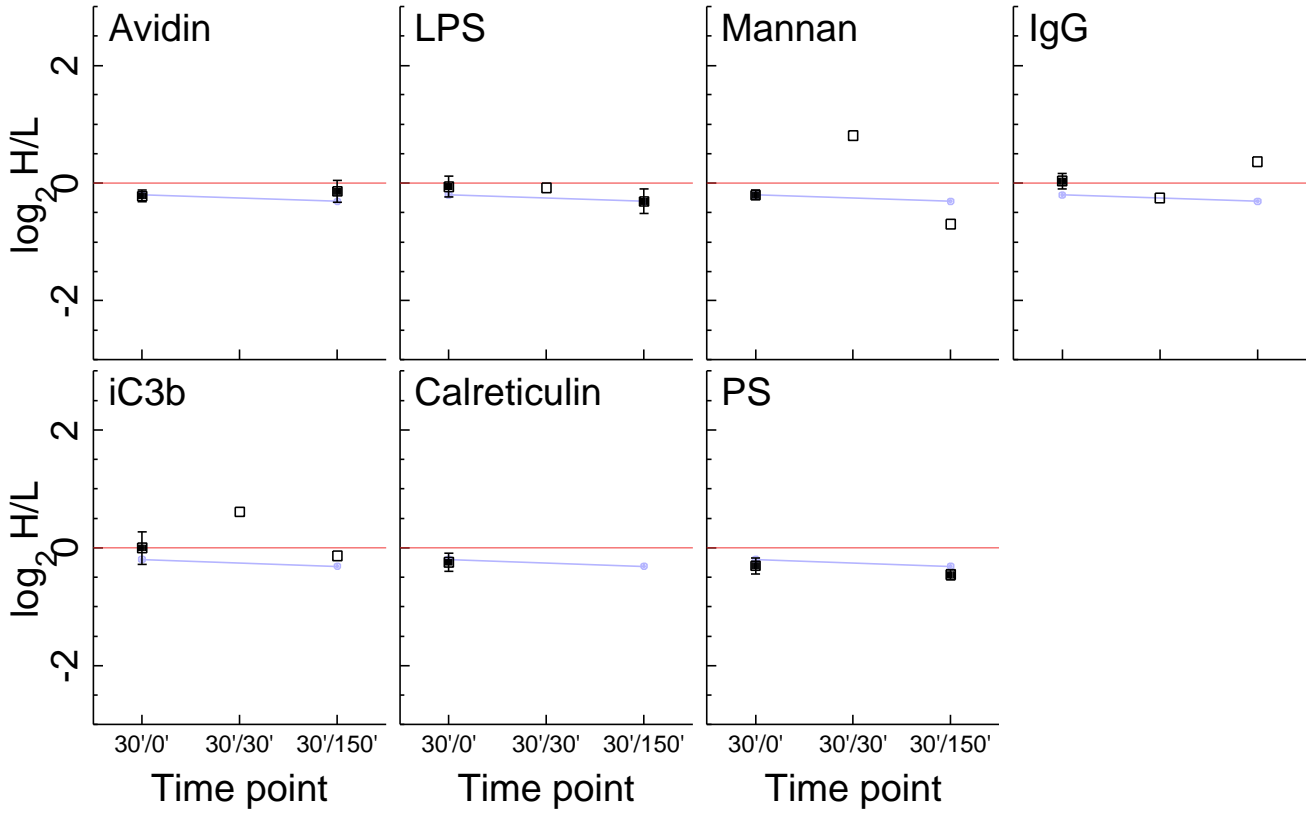

atp5j2 (P56135)

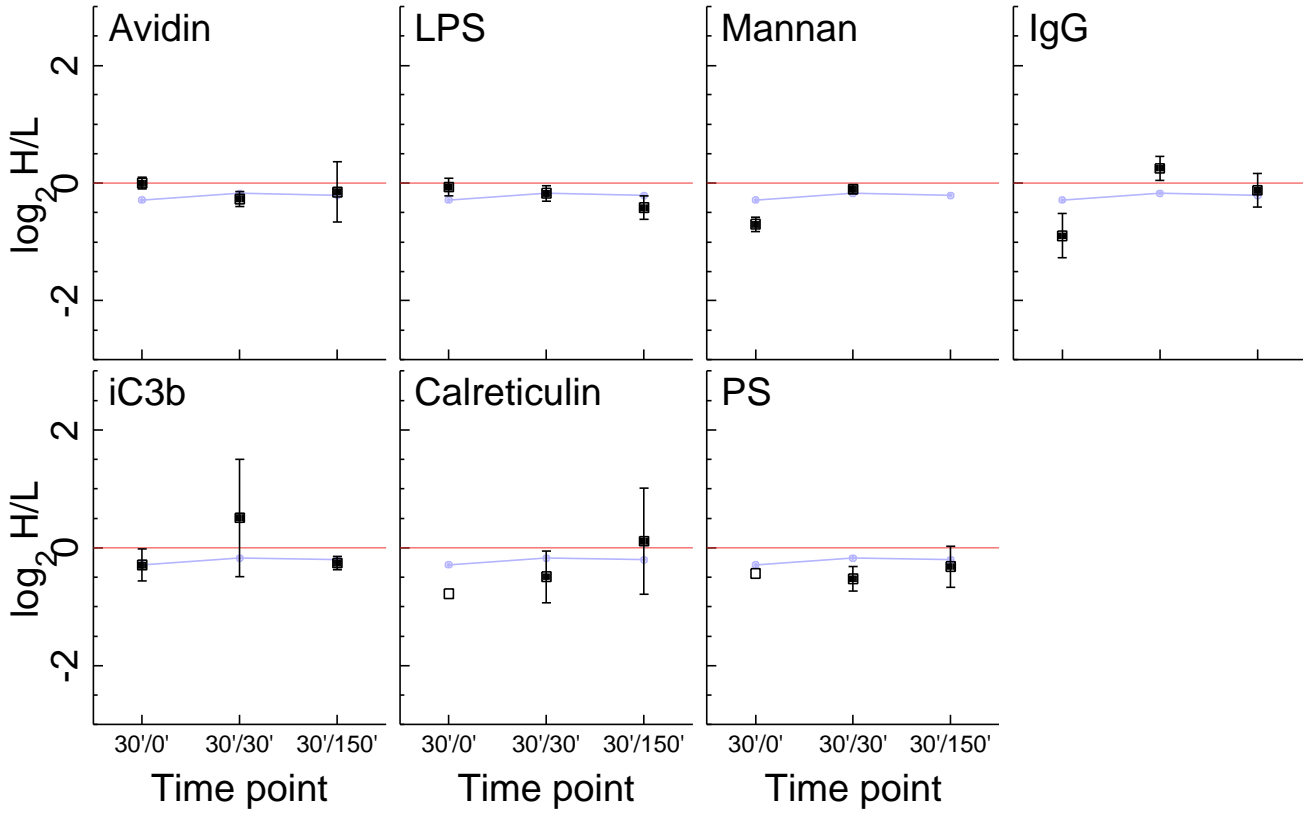

atp5j (P97450)

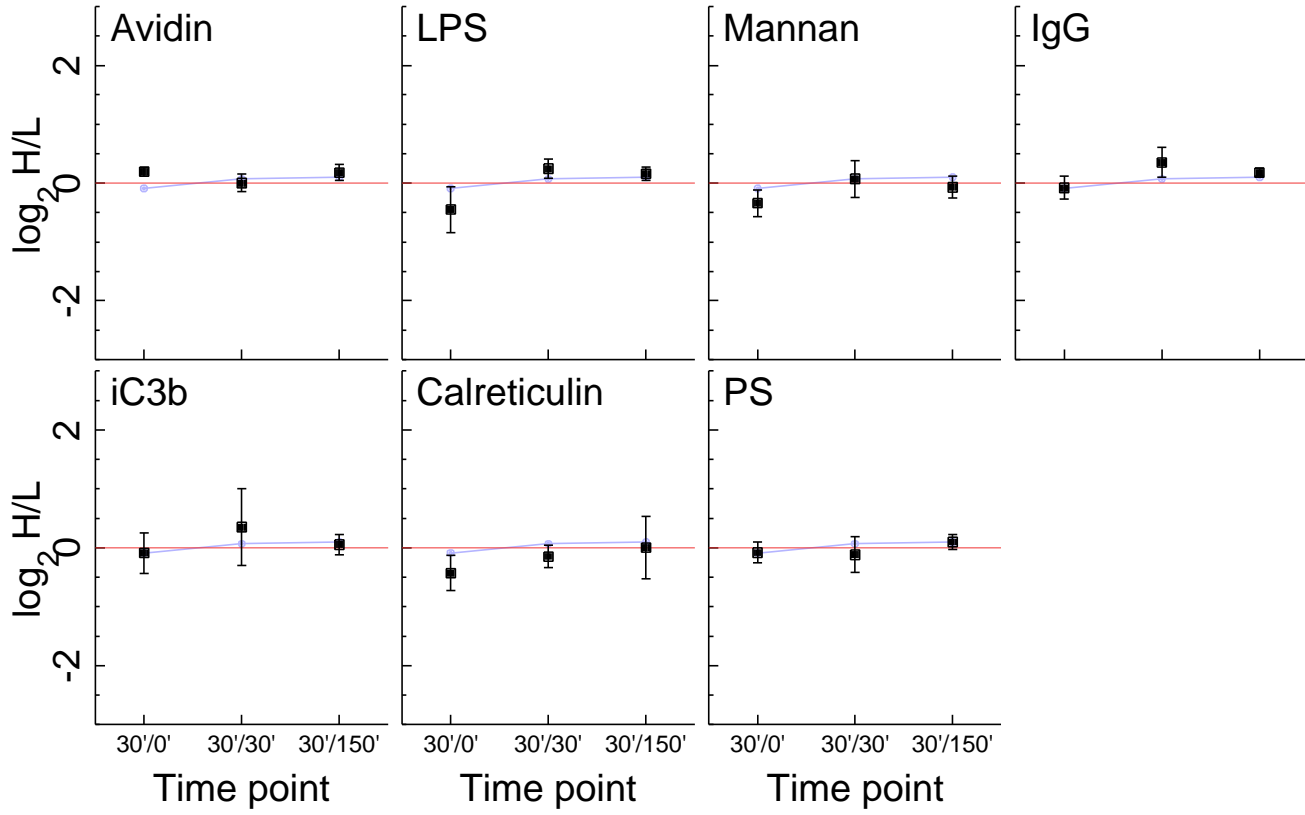

atp5l (Q9CPQ8)

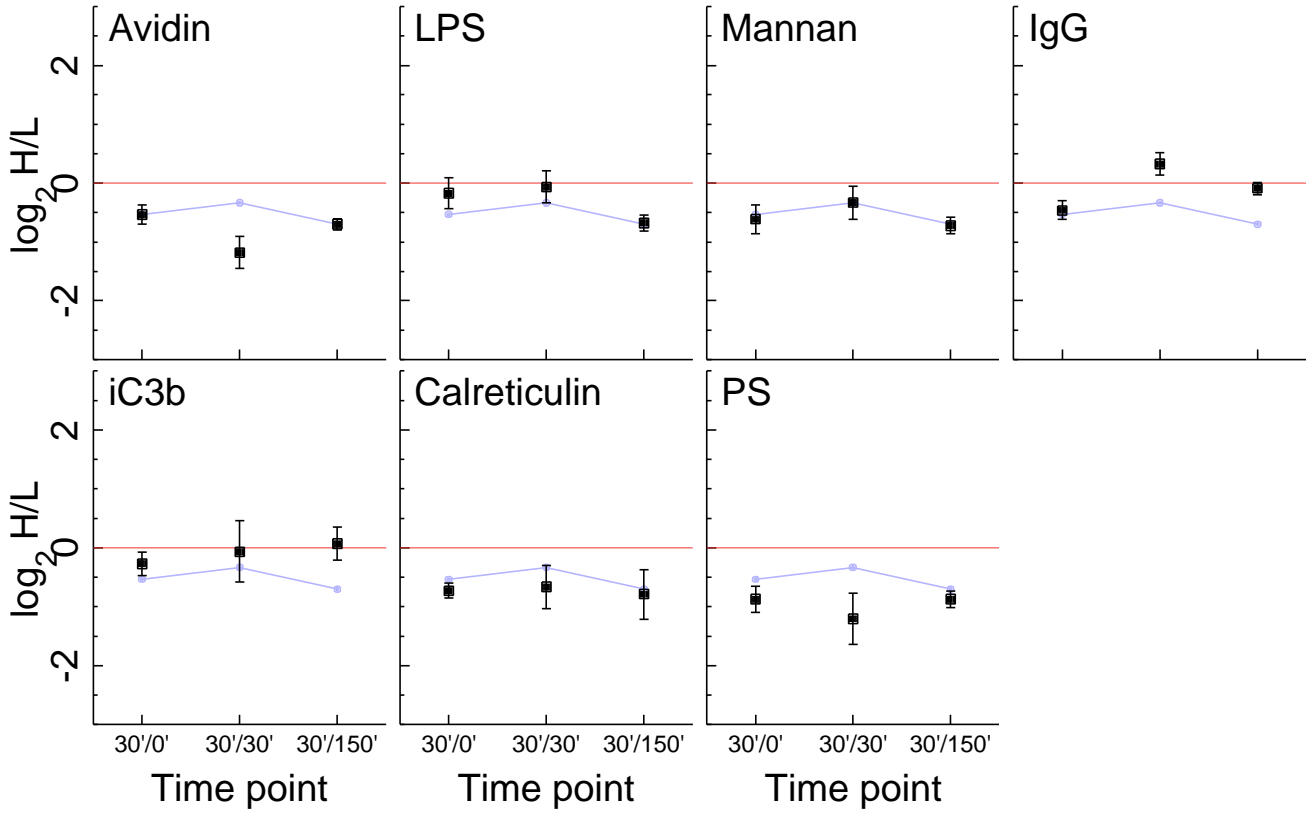

atp5o (Q9DB20)

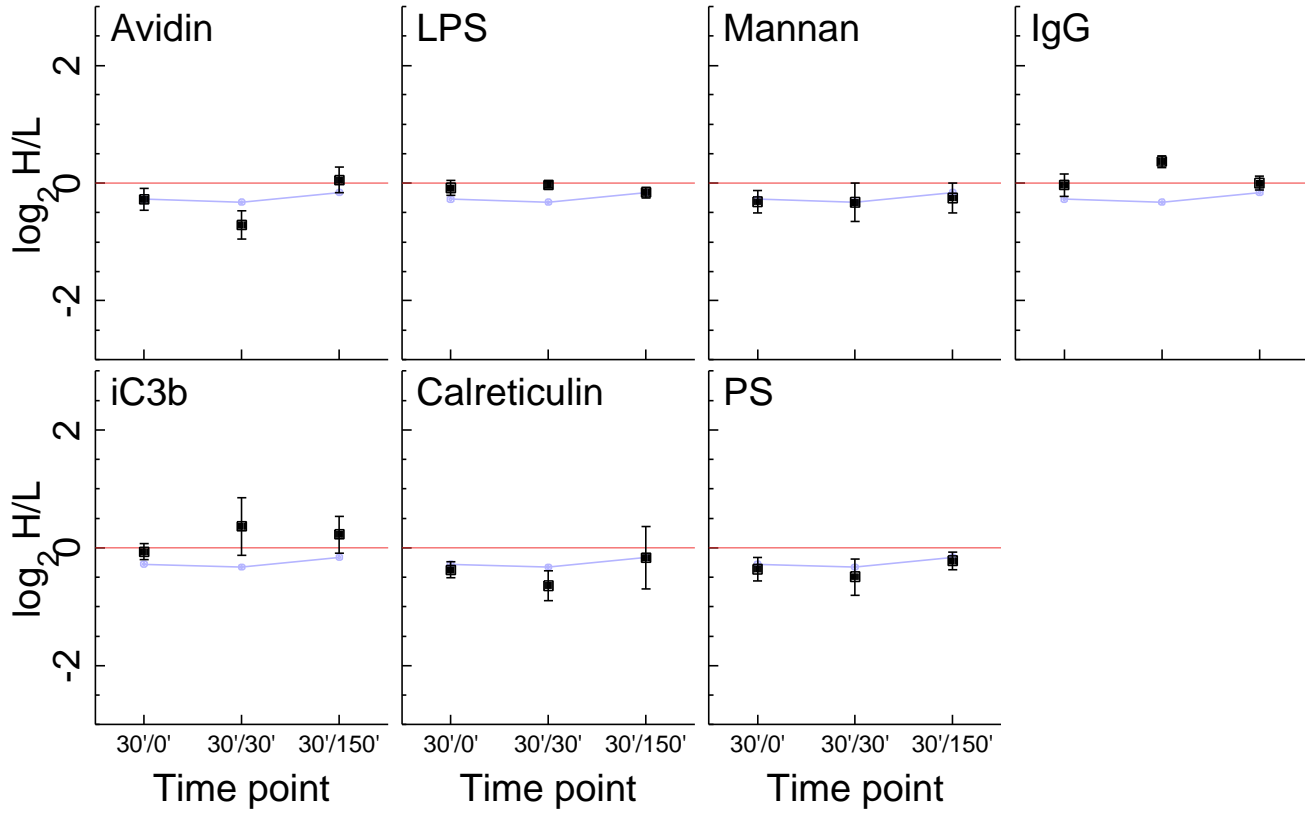

atp6ap1 (Q9R1Q9)

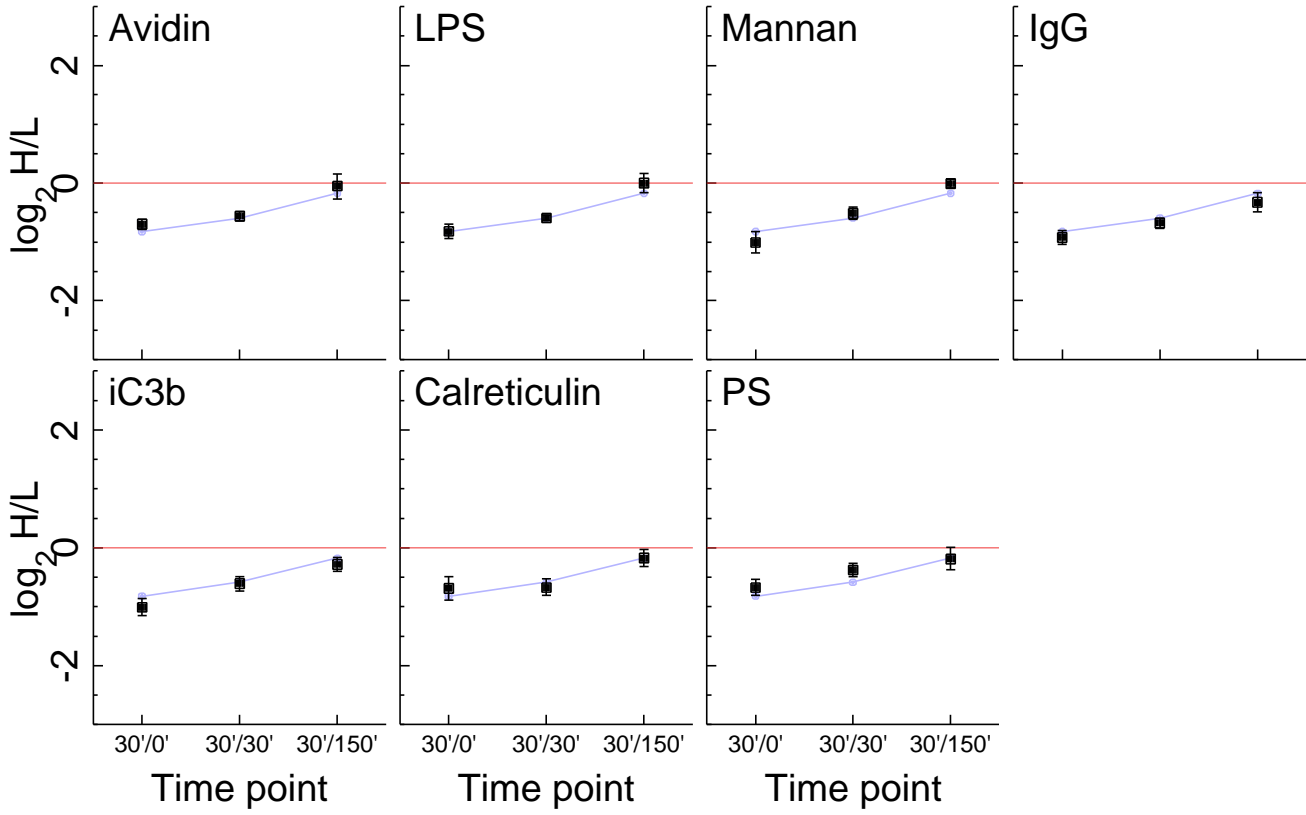

### atp6ap2 (Q9CYN9)

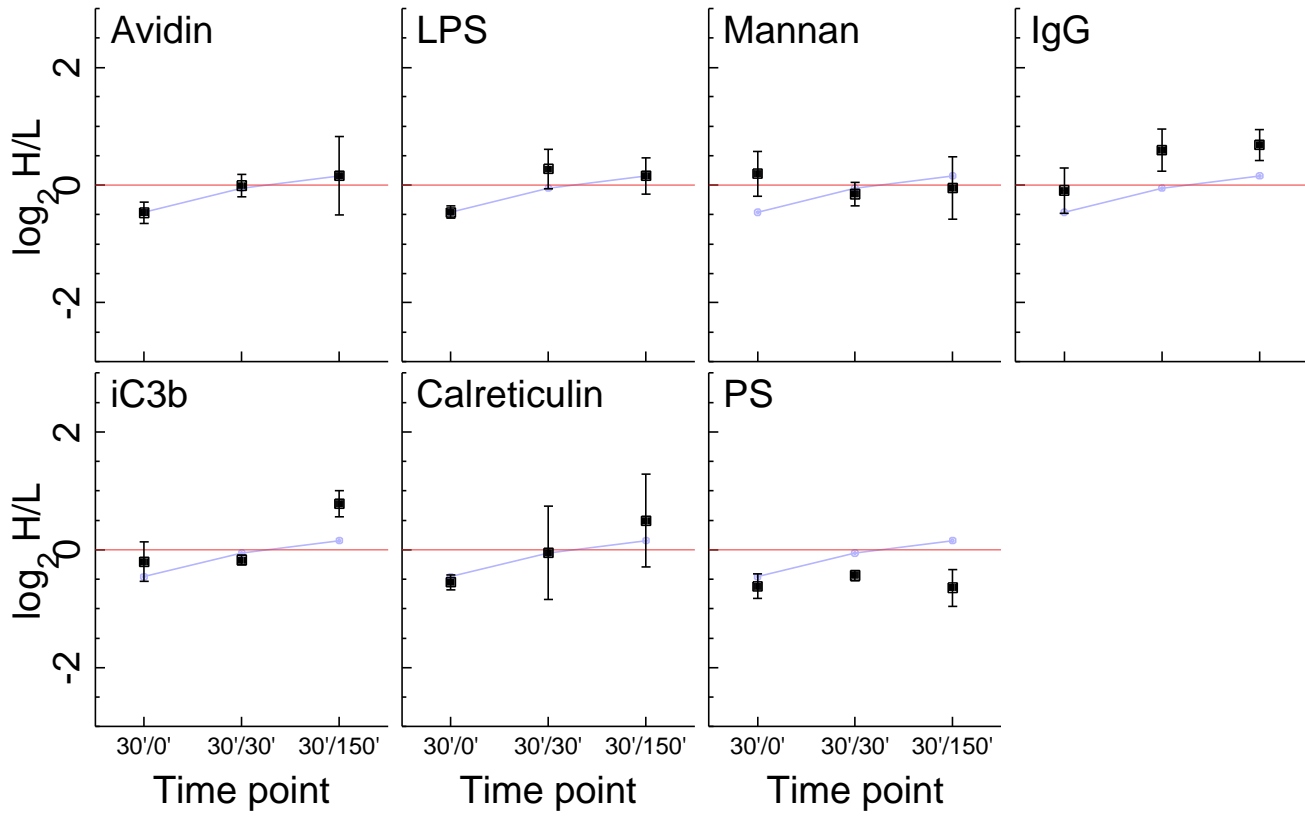



atp6v0a1 (Q9Z1G4)

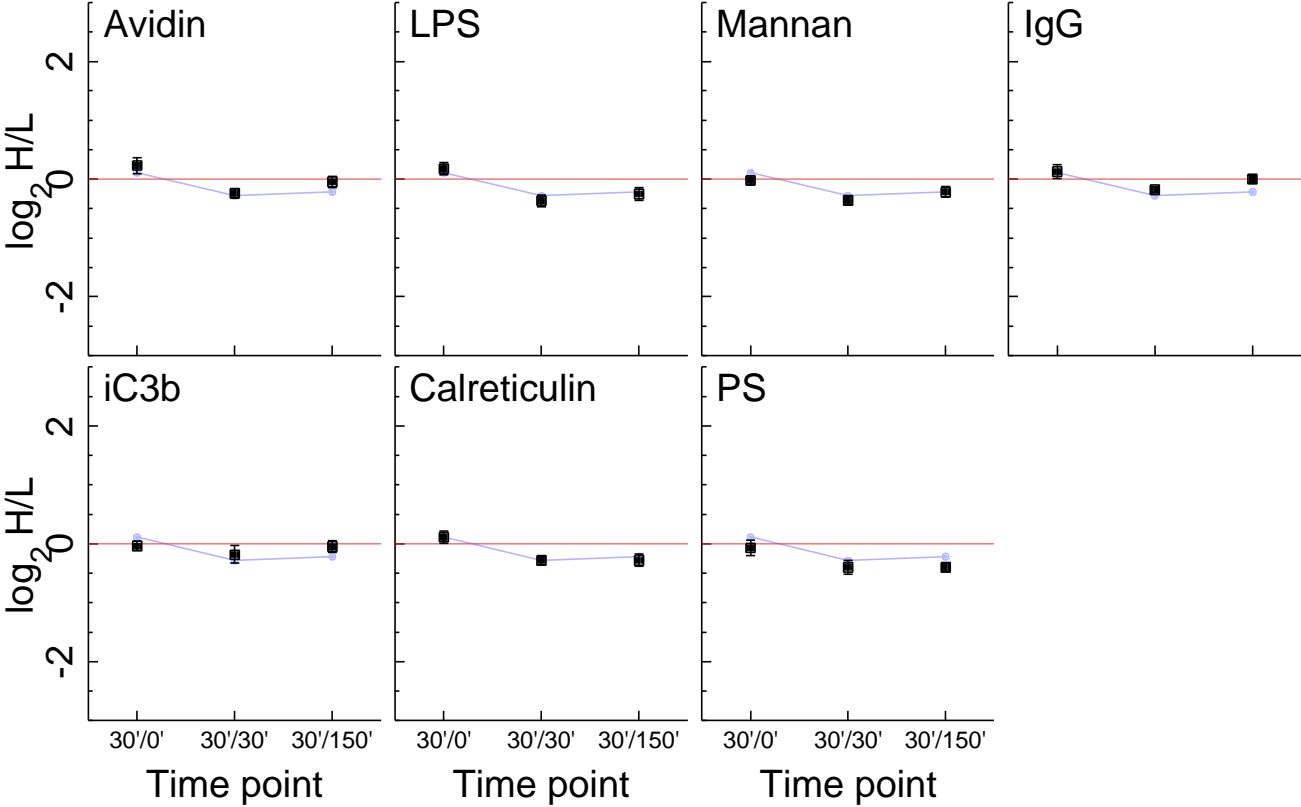

atp6v0c (P63082)

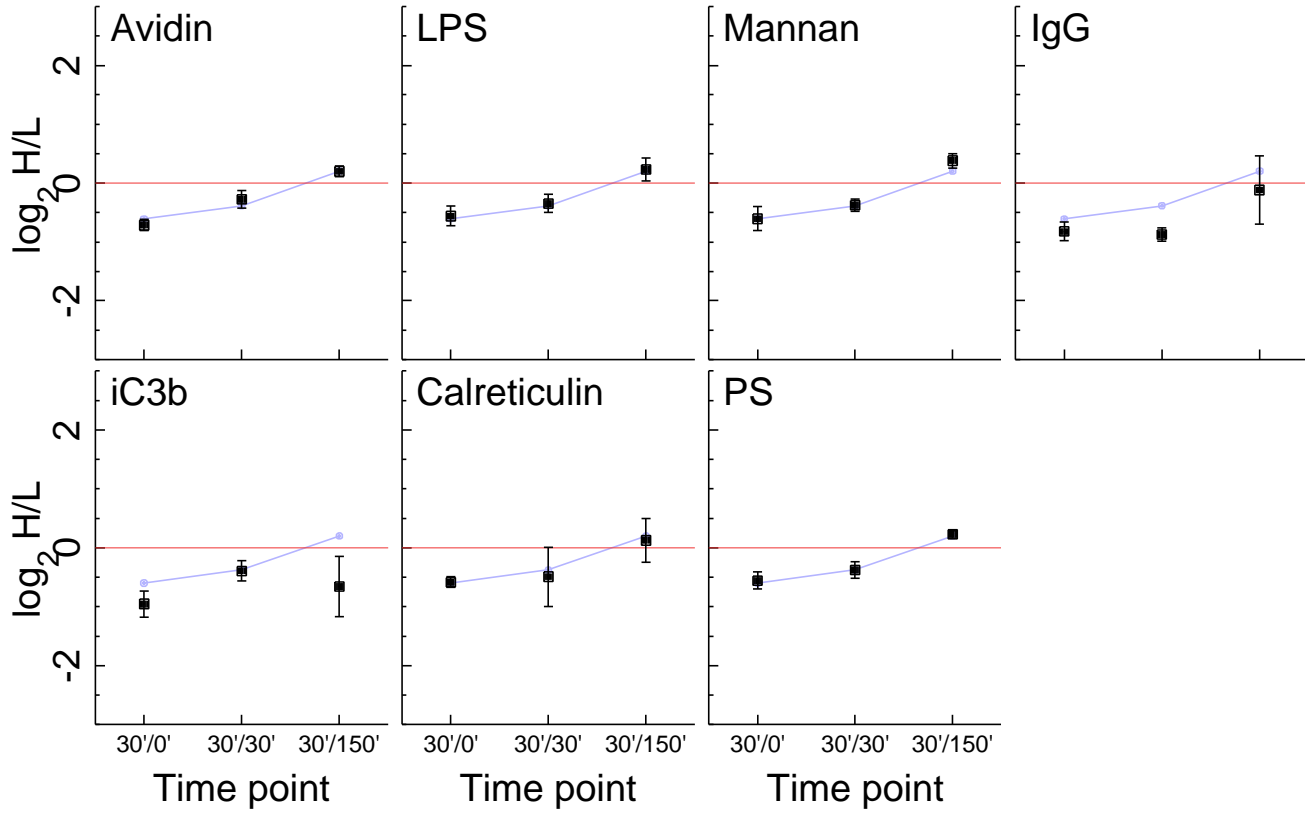

atp6v0d1 (P51863)

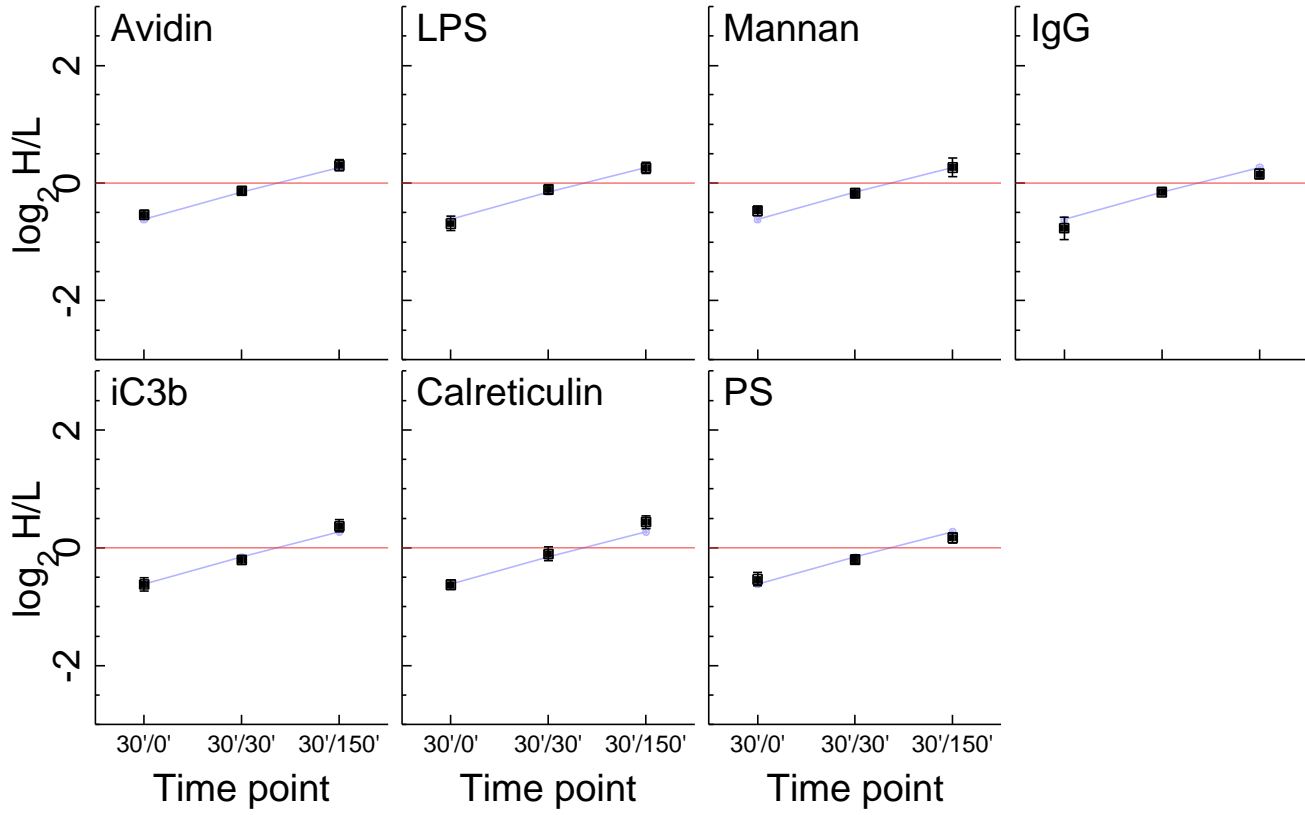

atp6v0d2 (Q80SY3)

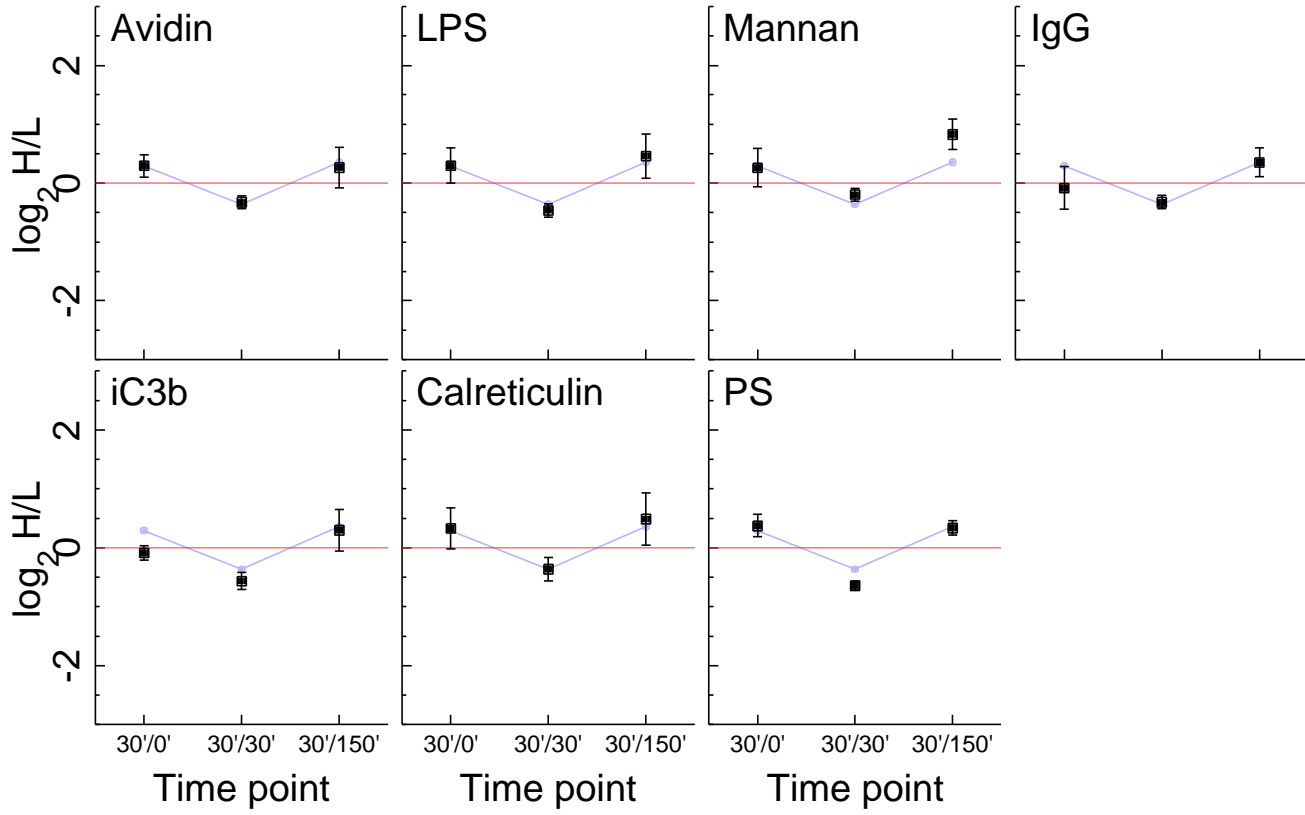

### atp6v1a (P50516)

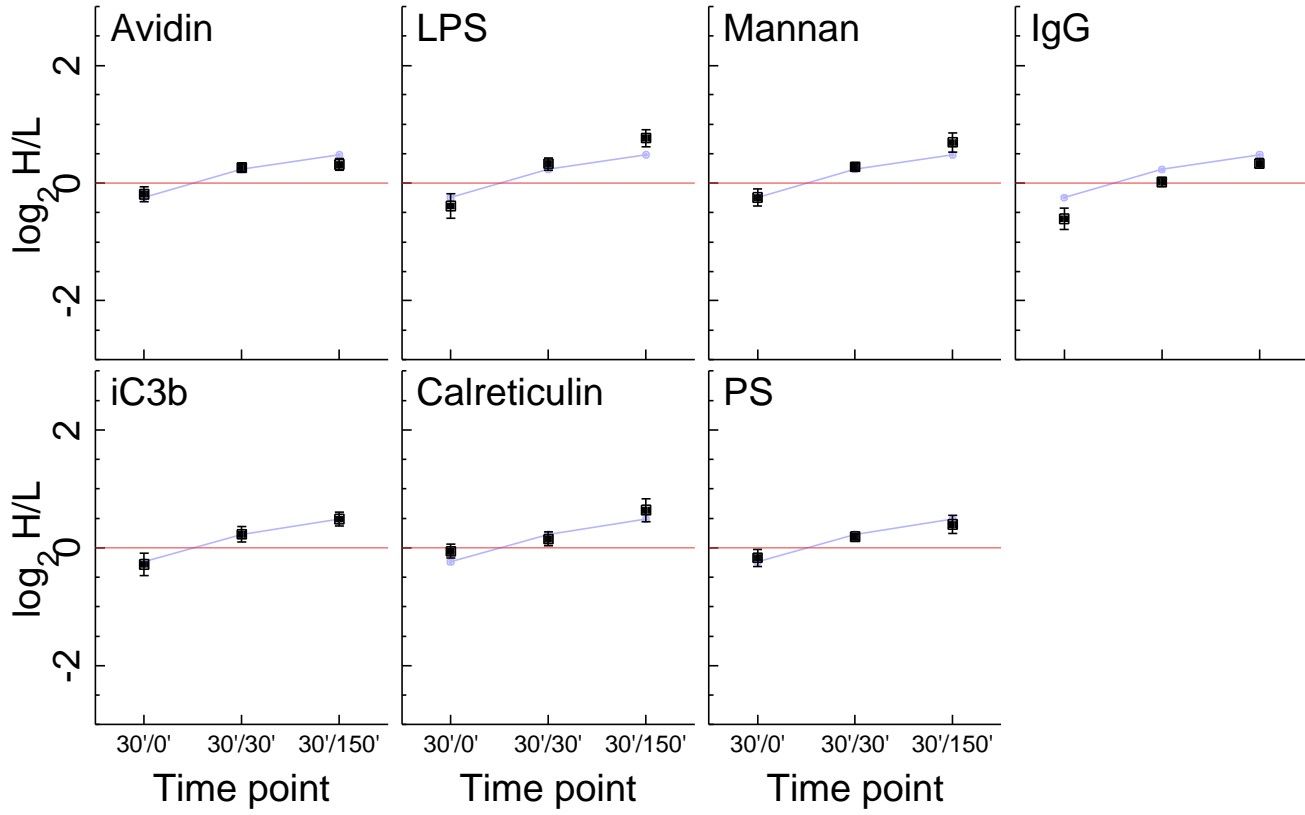

atp6v1b2 (P62814)

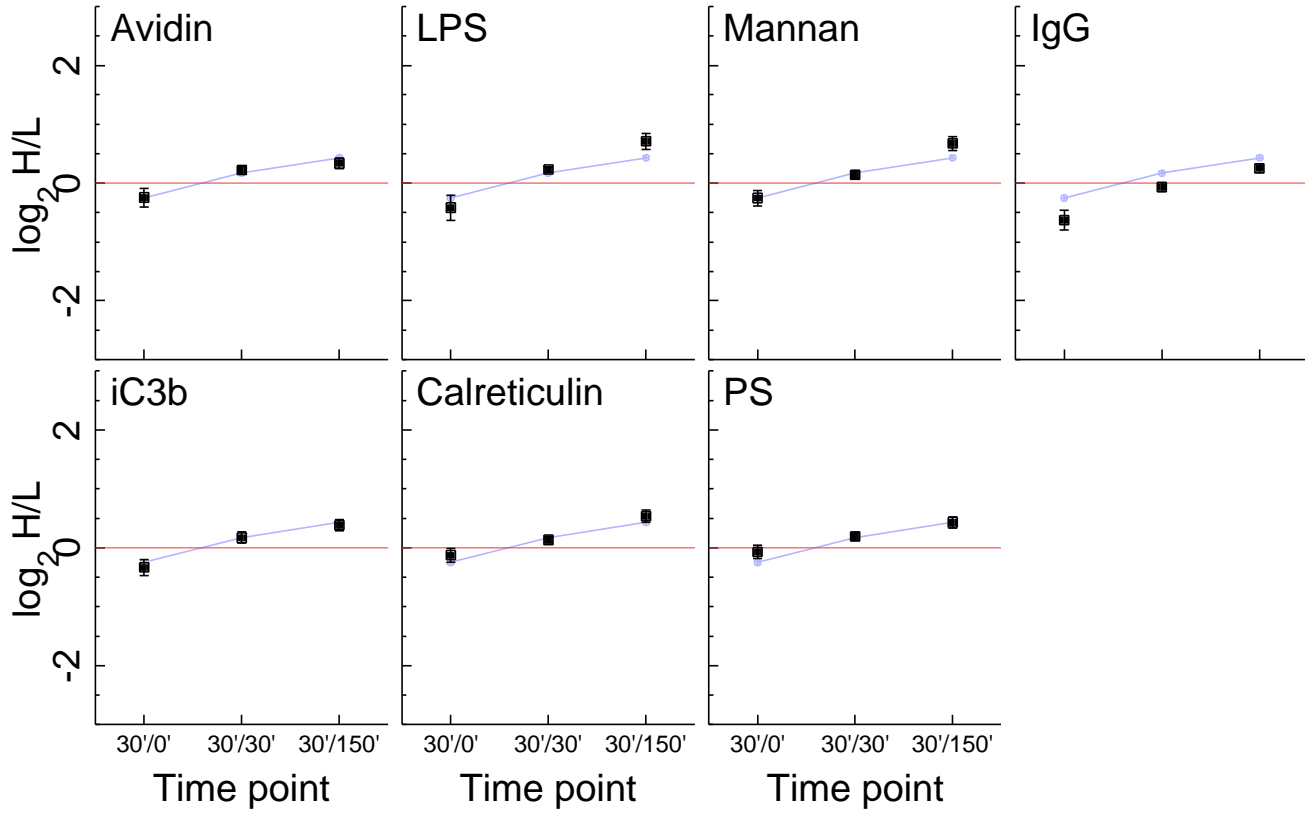

atp6v1c1 (Q9Z1G3)

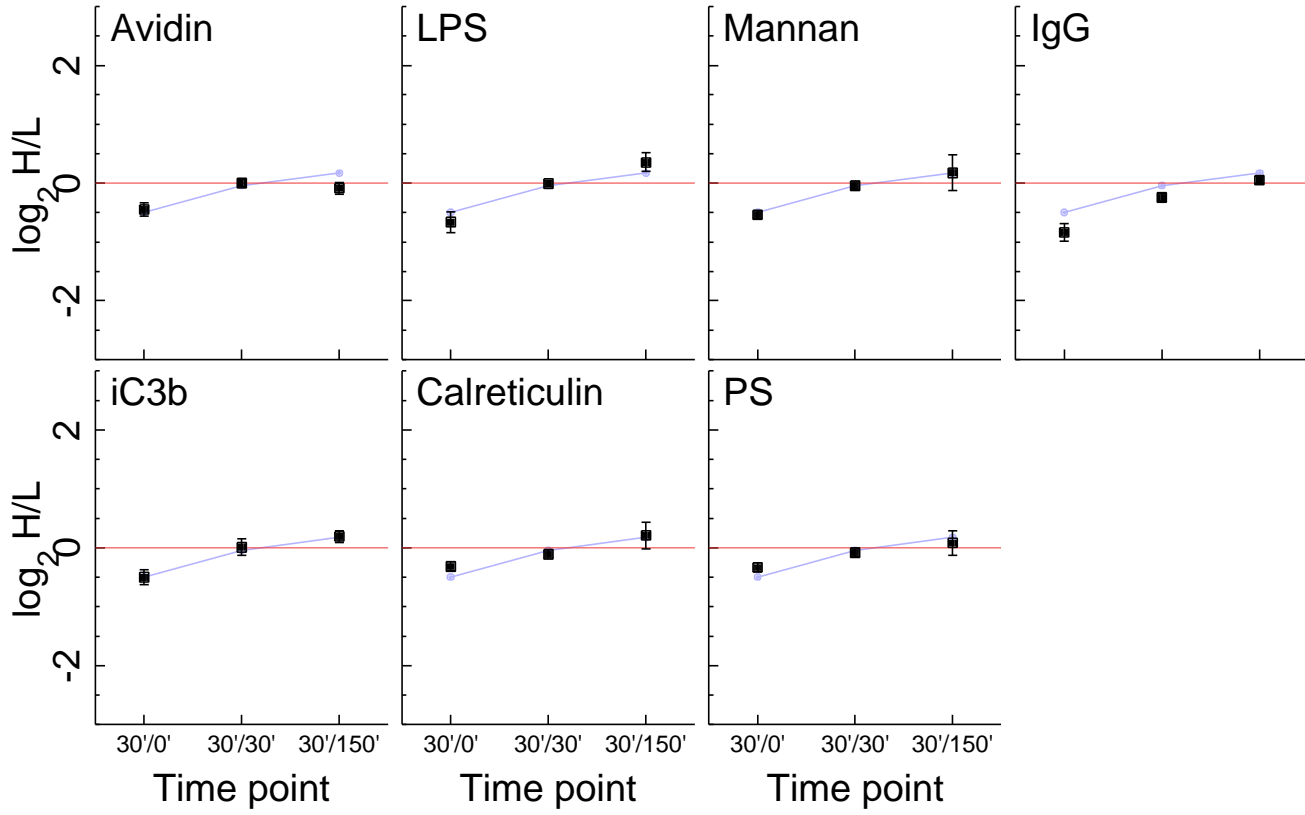

### atp6v1d (P57746)

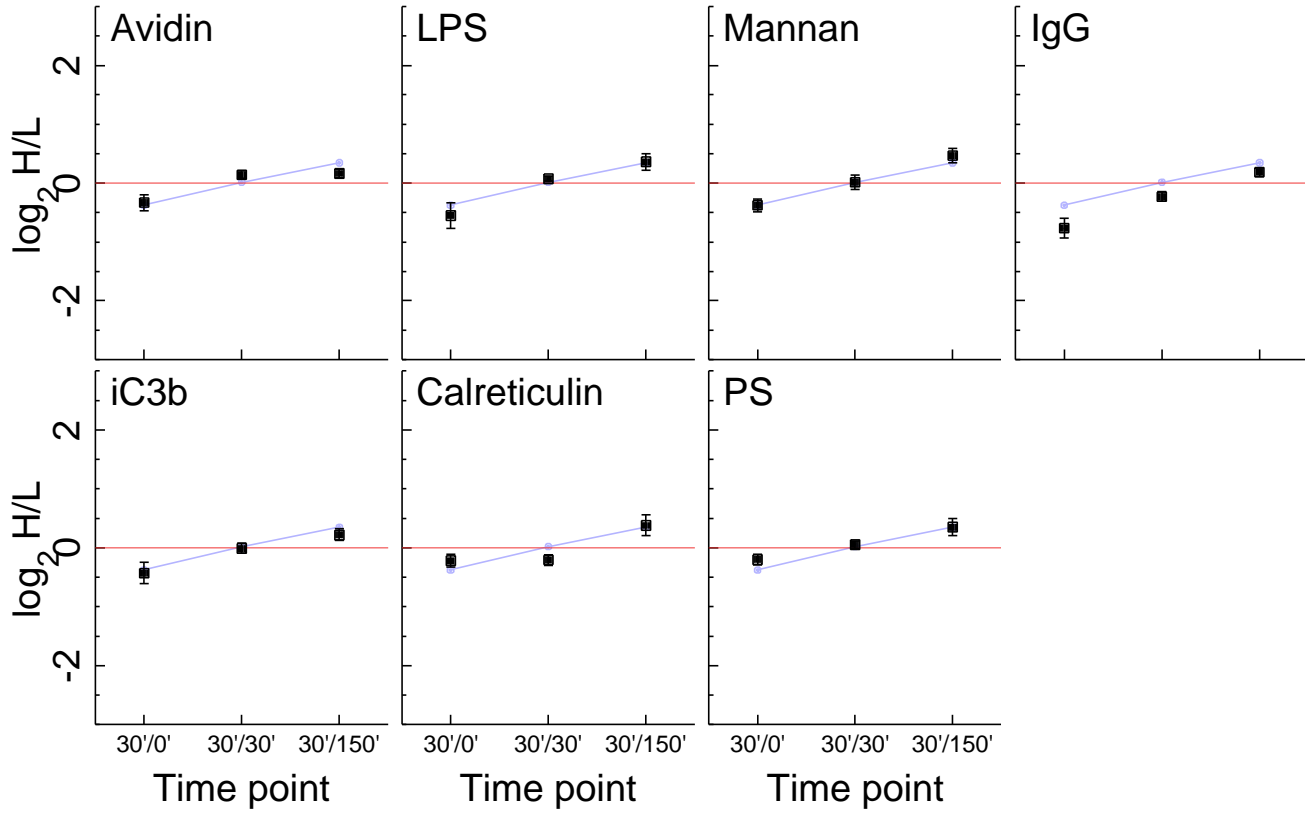



atp6v1e1 (P50518)

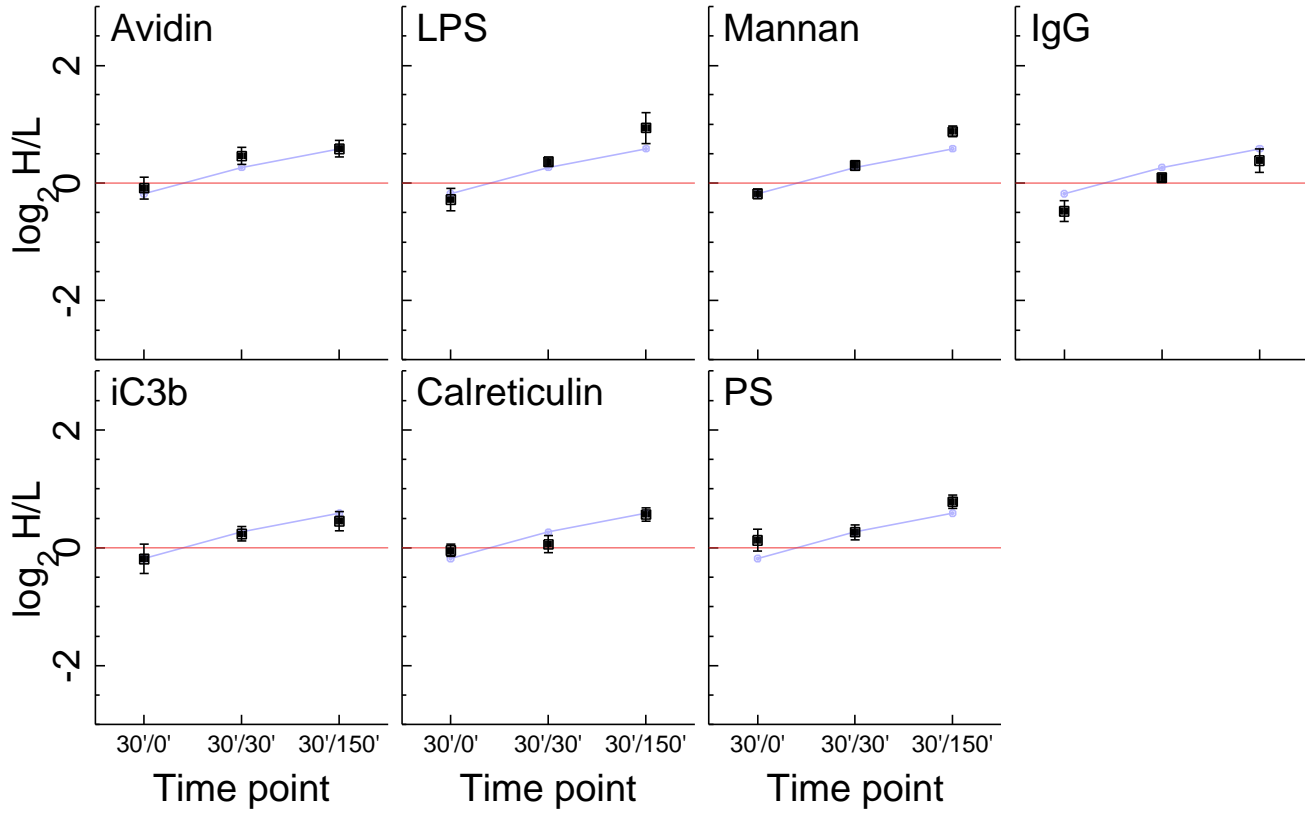

### atp6v1f (Q9D1K2)

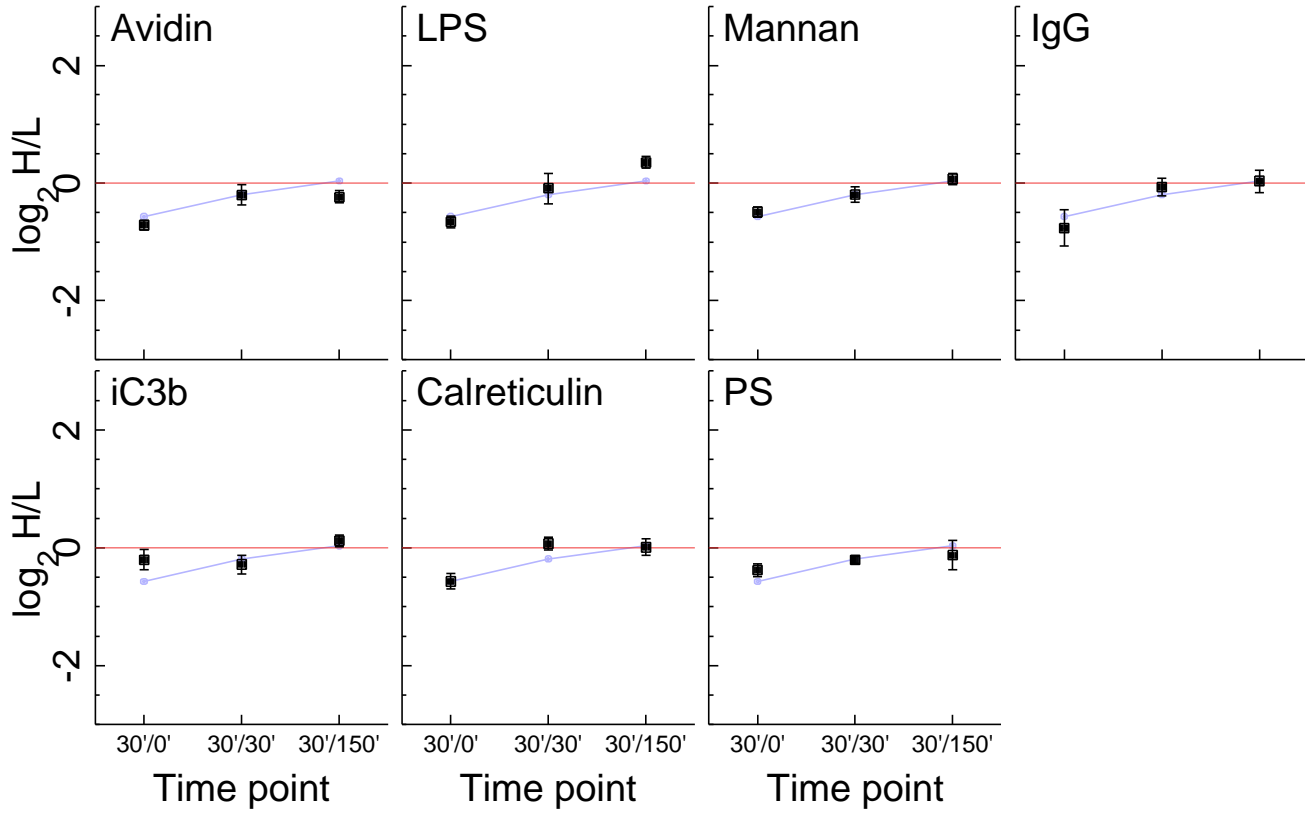

atp6v1g1 (Q9CR51)

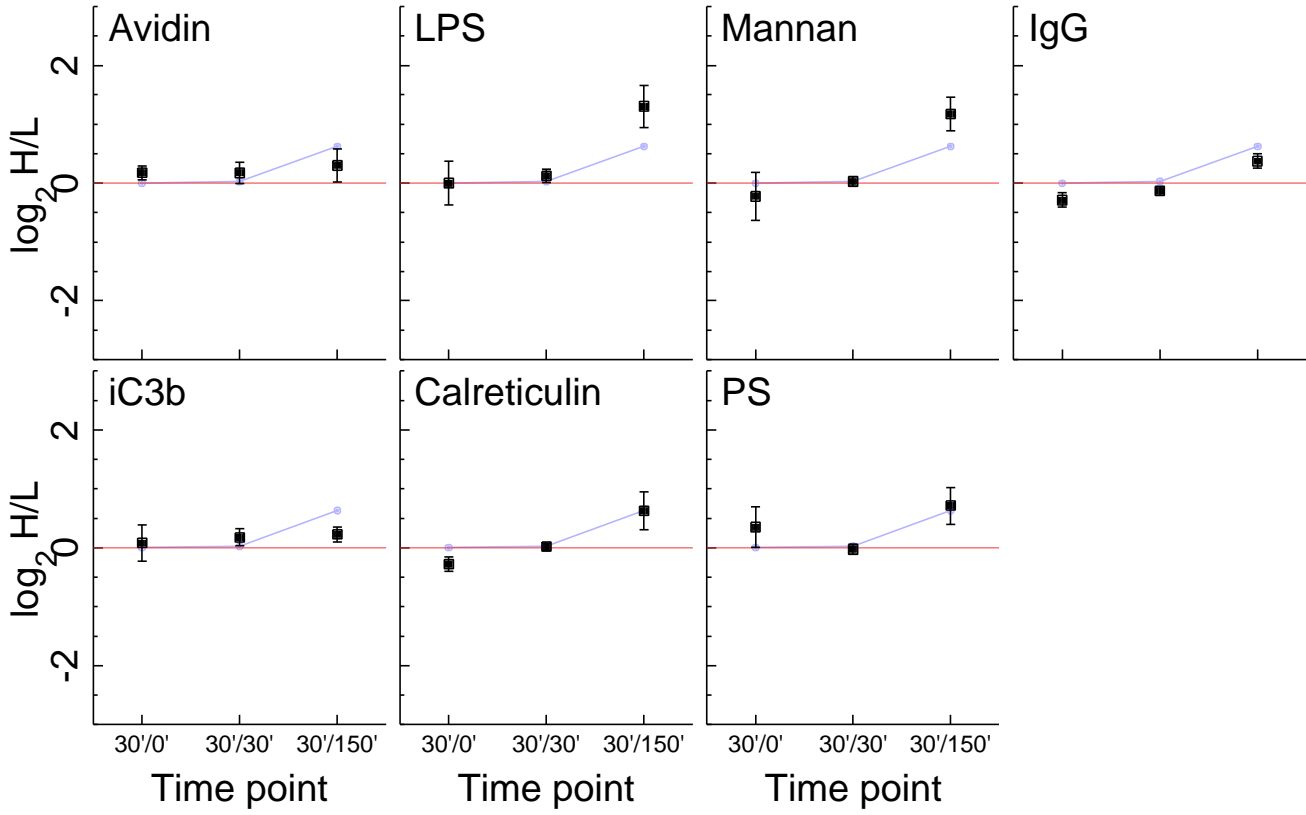

### atp6v1h (Q8BVE3)

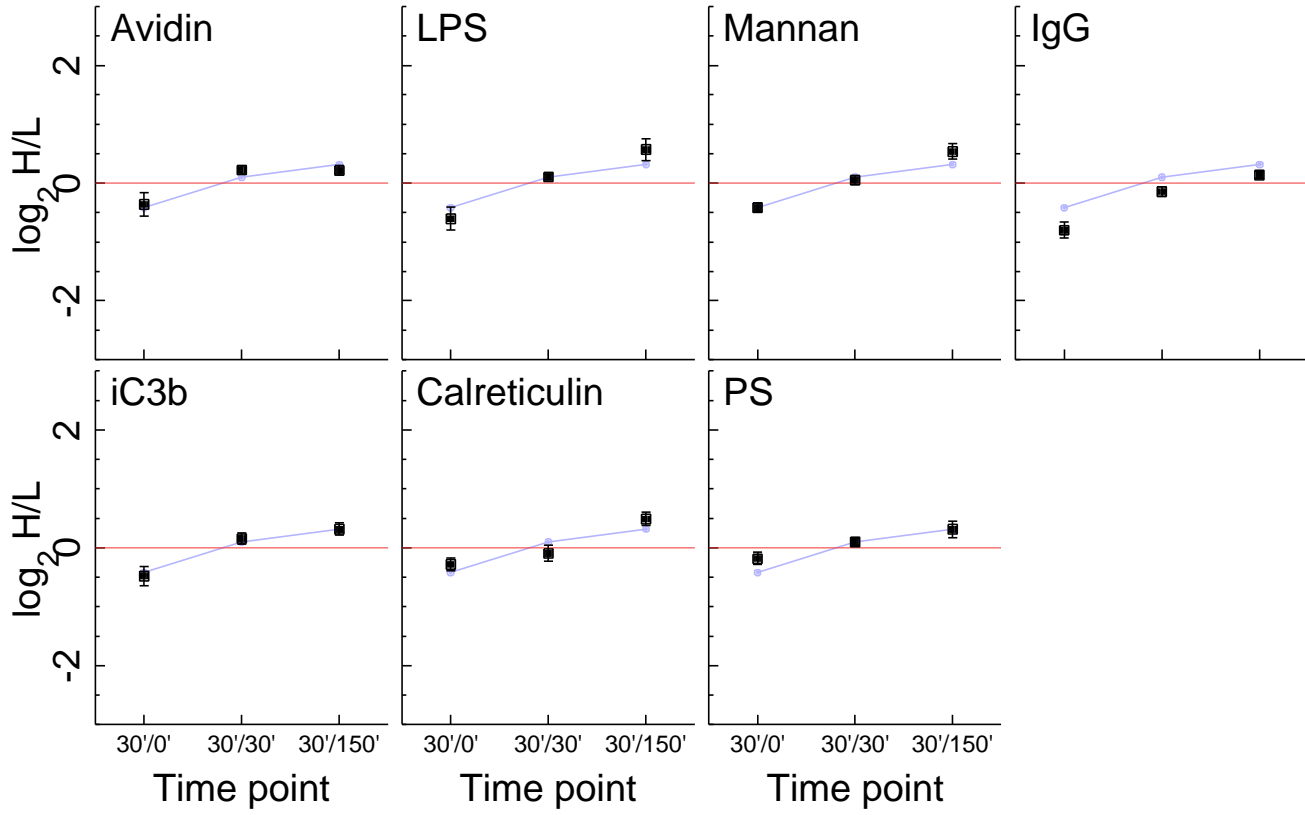

atp8a1 (P70704)

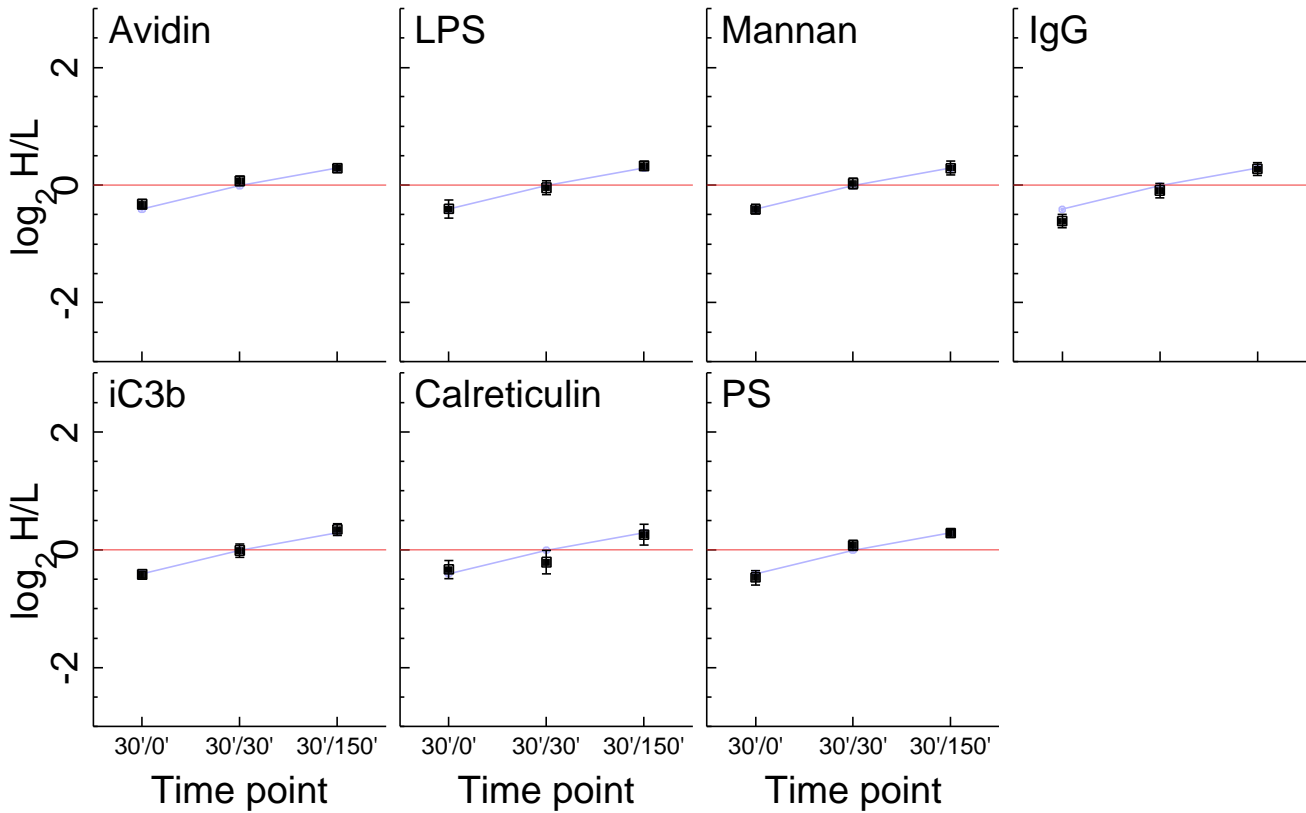

atp9b (D3YV00)

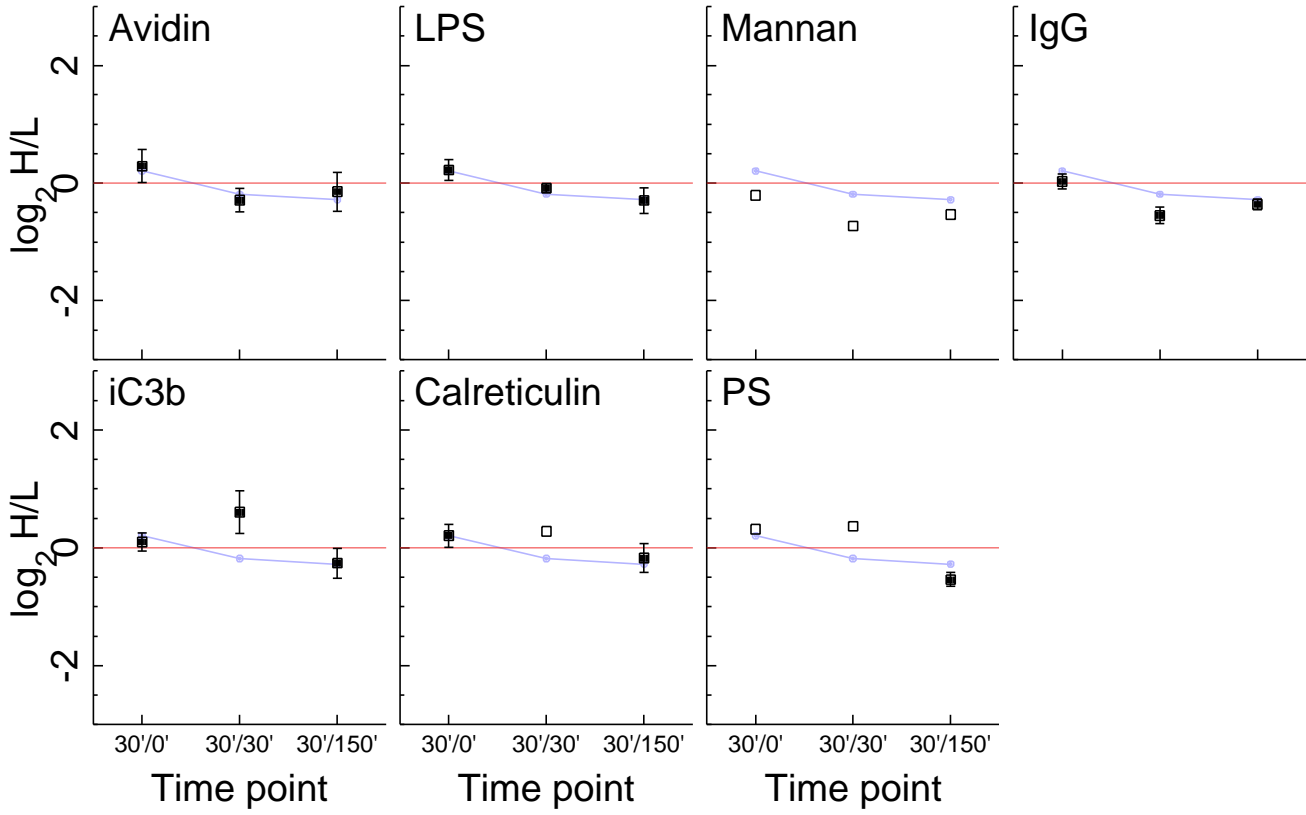

### atpif1 (O35143)

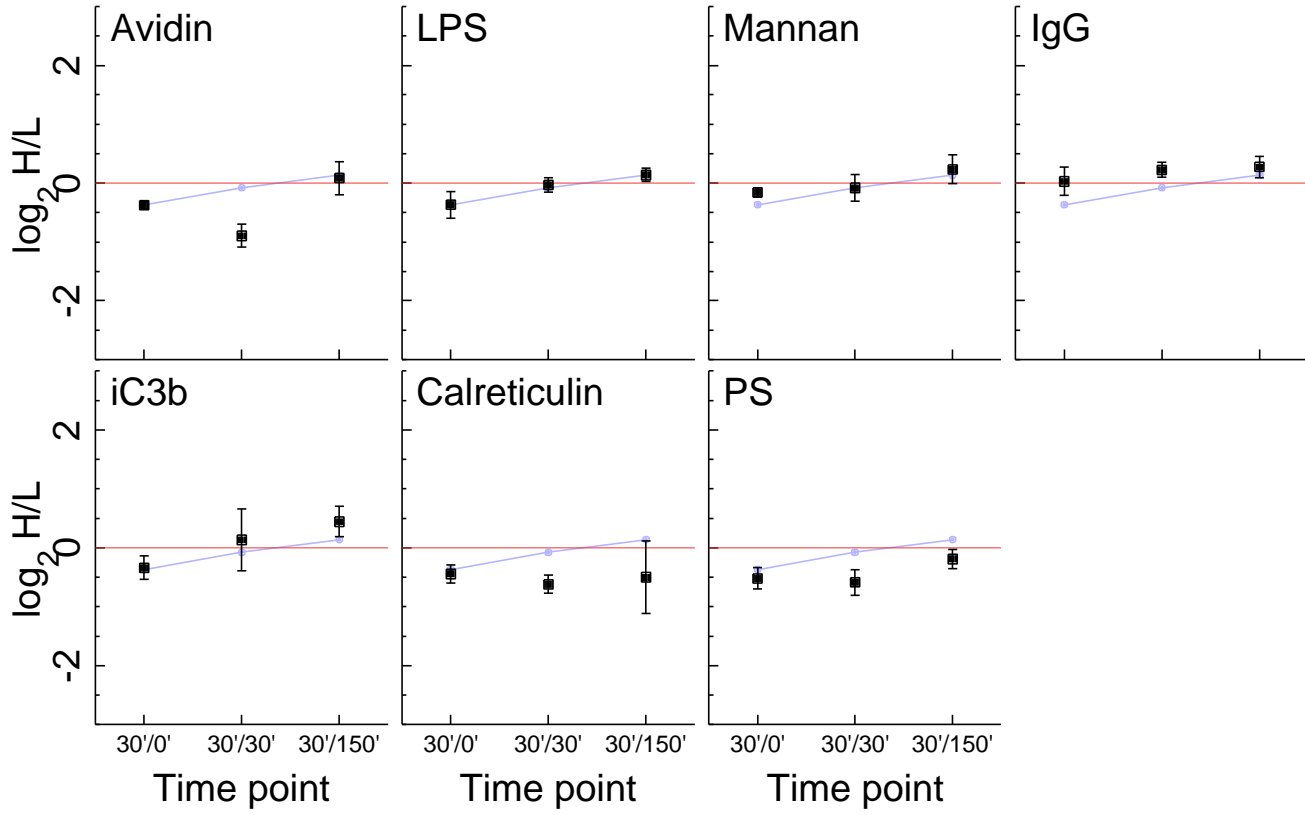

atrn (Q9WU60)

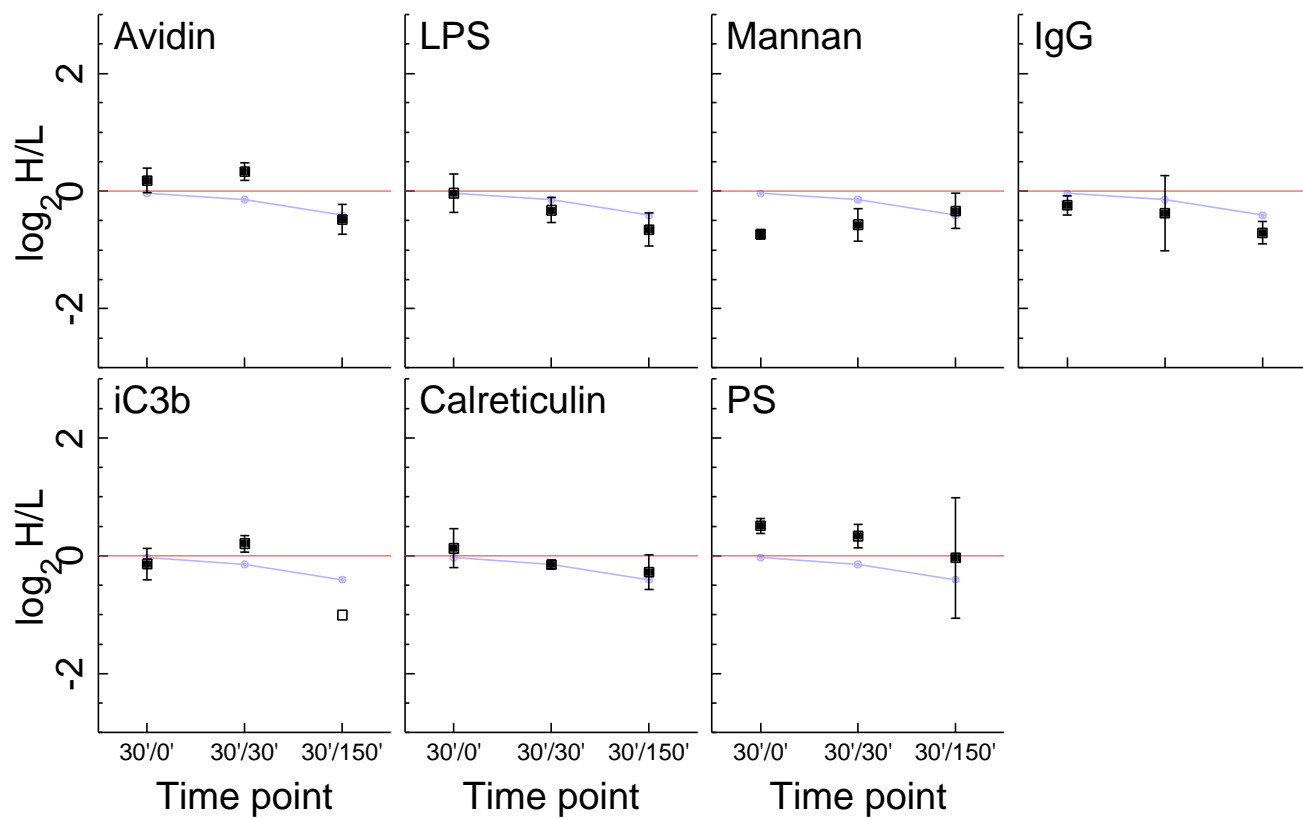



atxn2l (Q7TQH0)

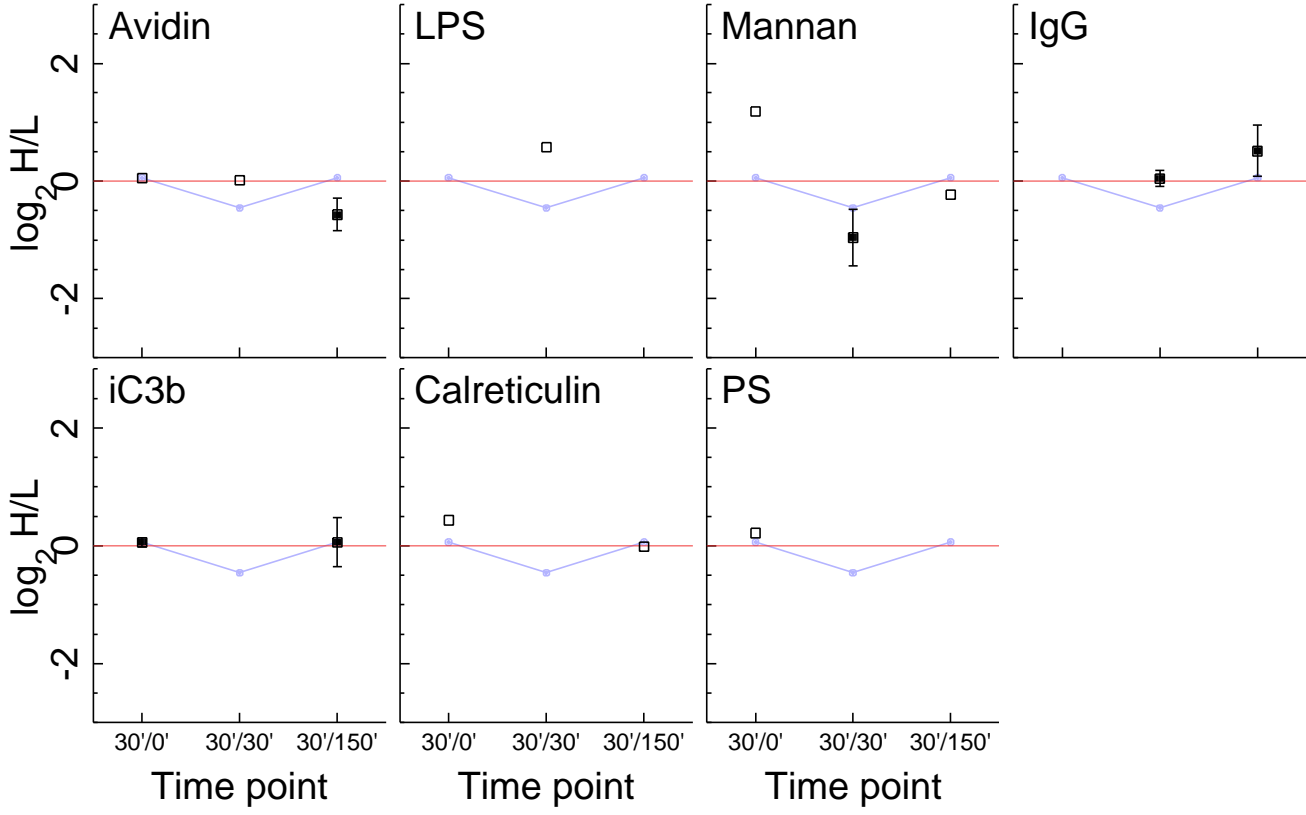

aup1 (Q3U3K9)

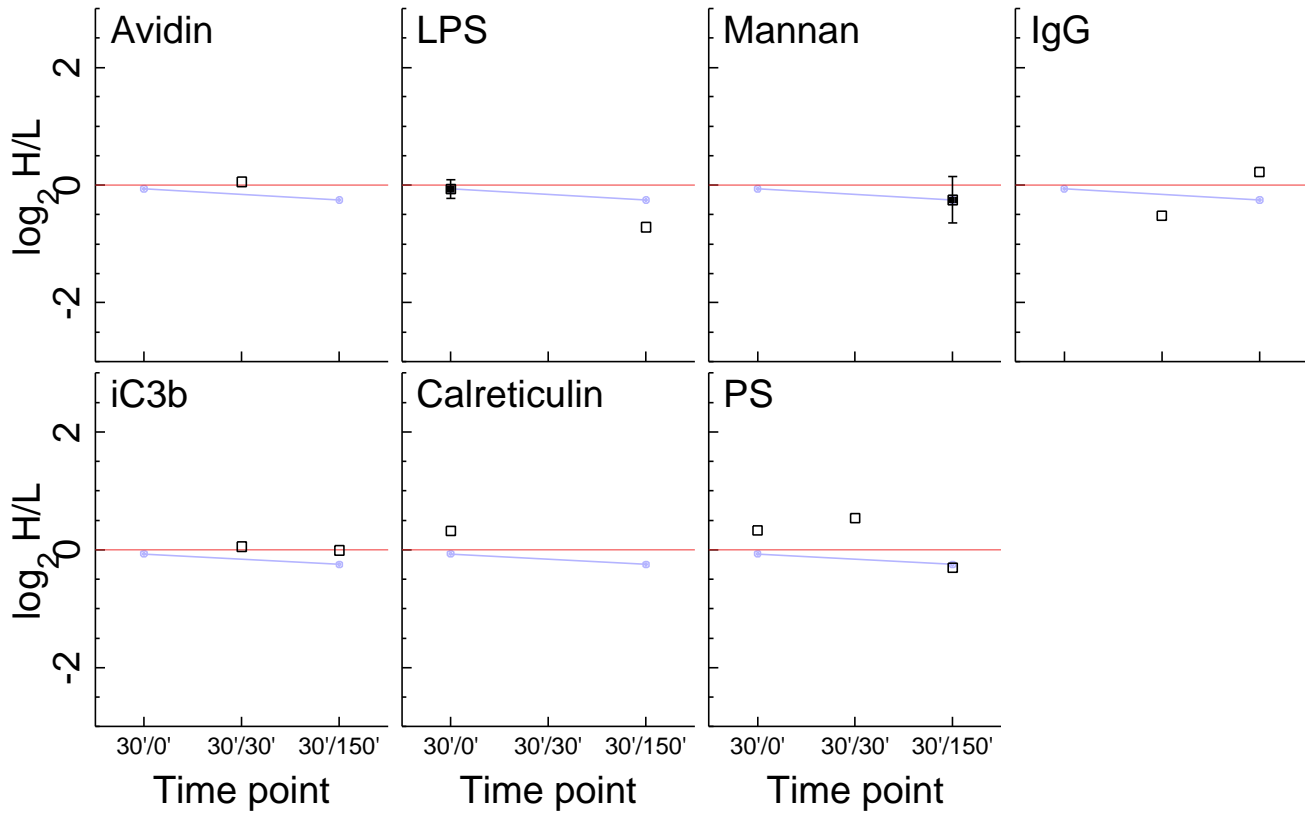

### b2m (P01887)

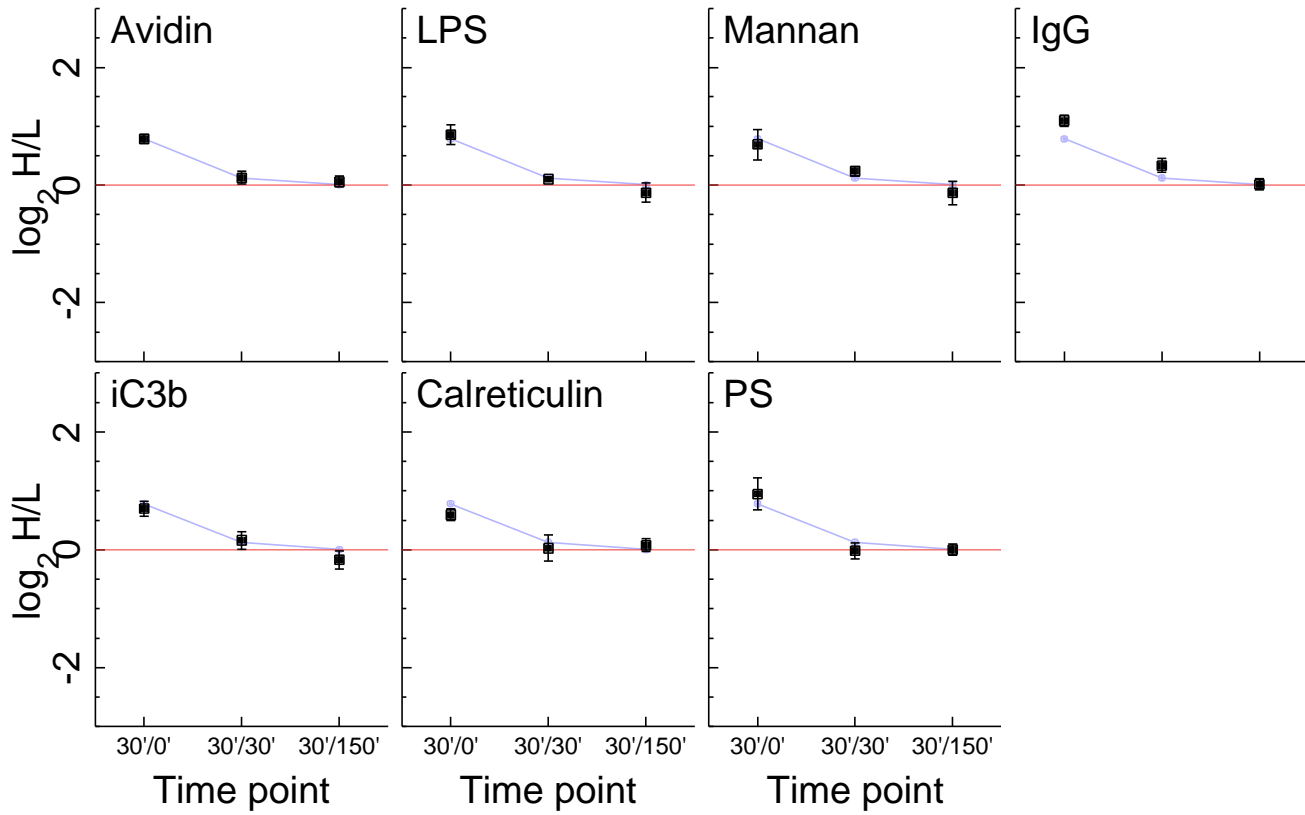

### b4galnt1 (Q09200)

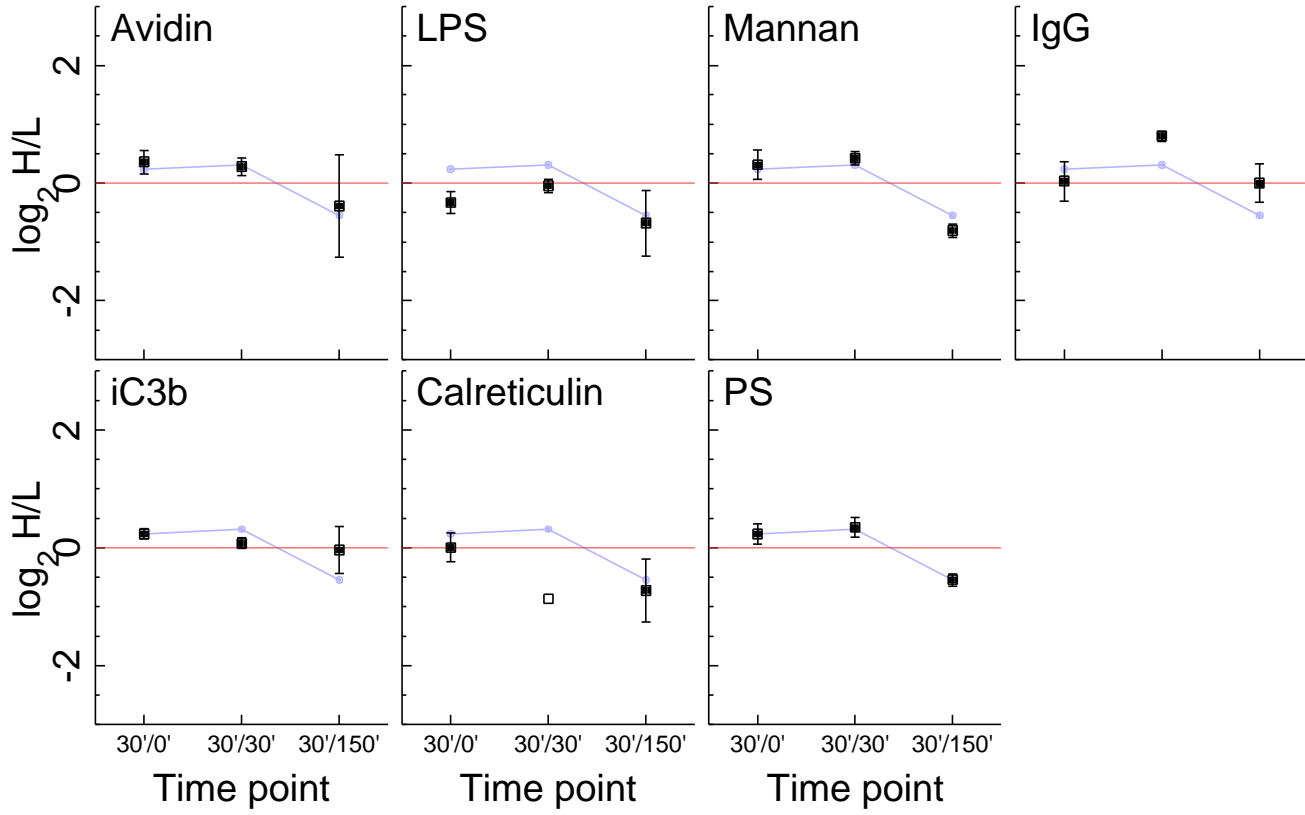

b4galt1 (P15535)

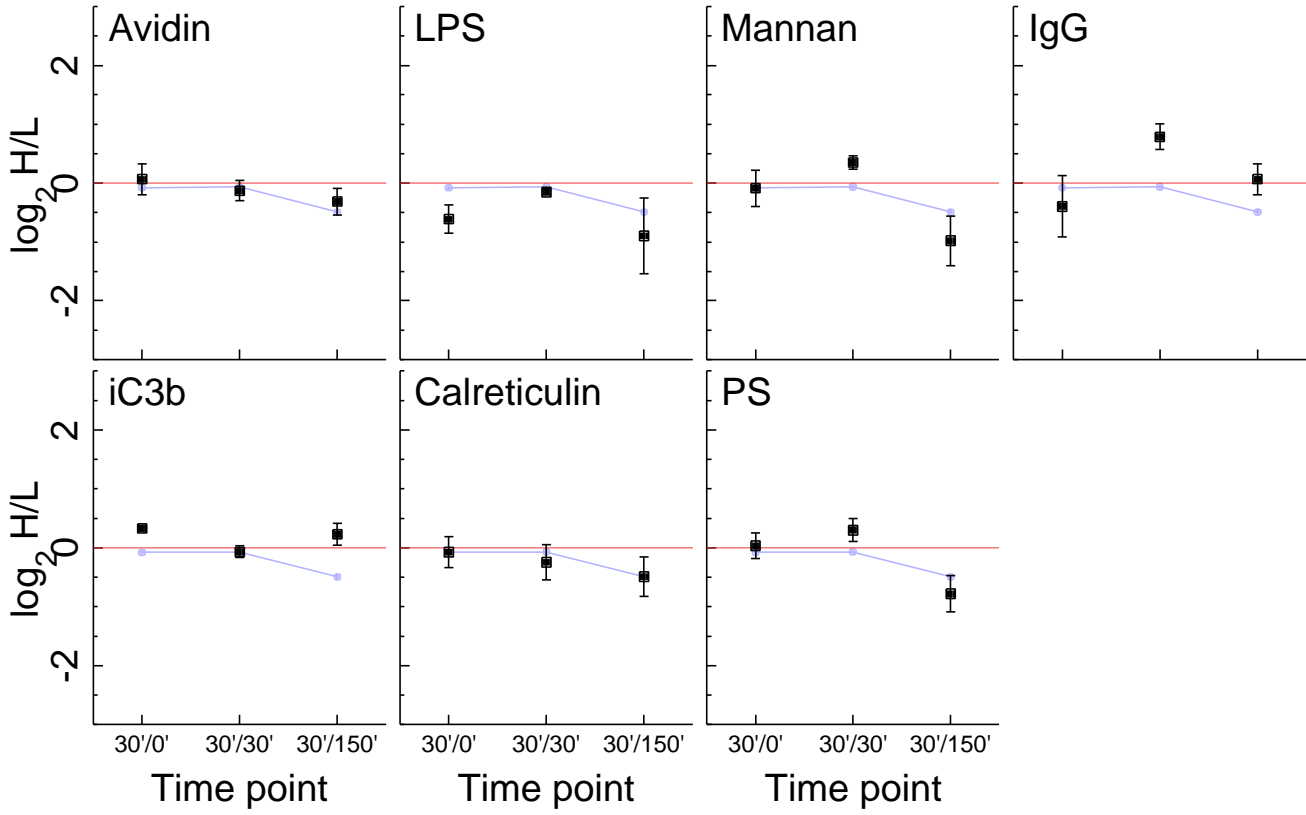

### bag3 (Q9JLV1)

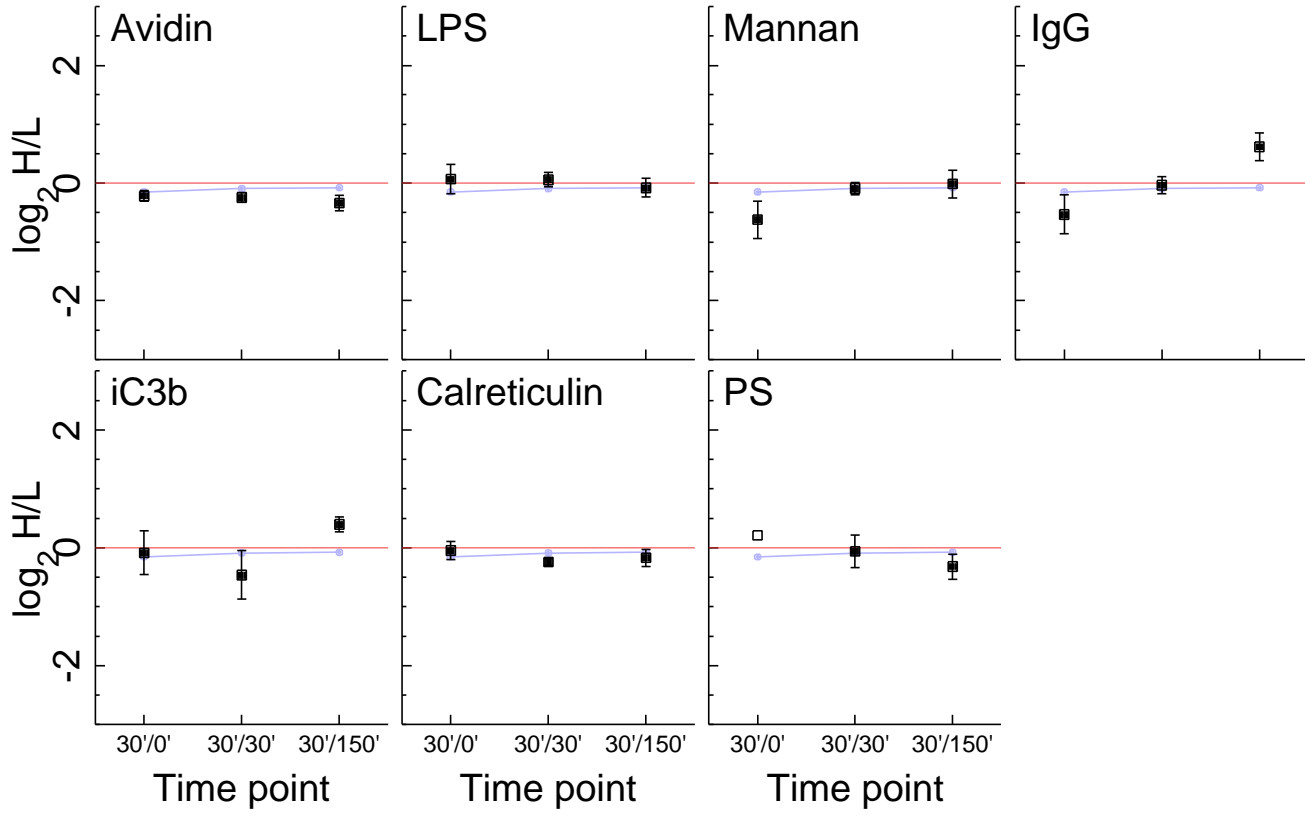

### bak1 (E9QM21)

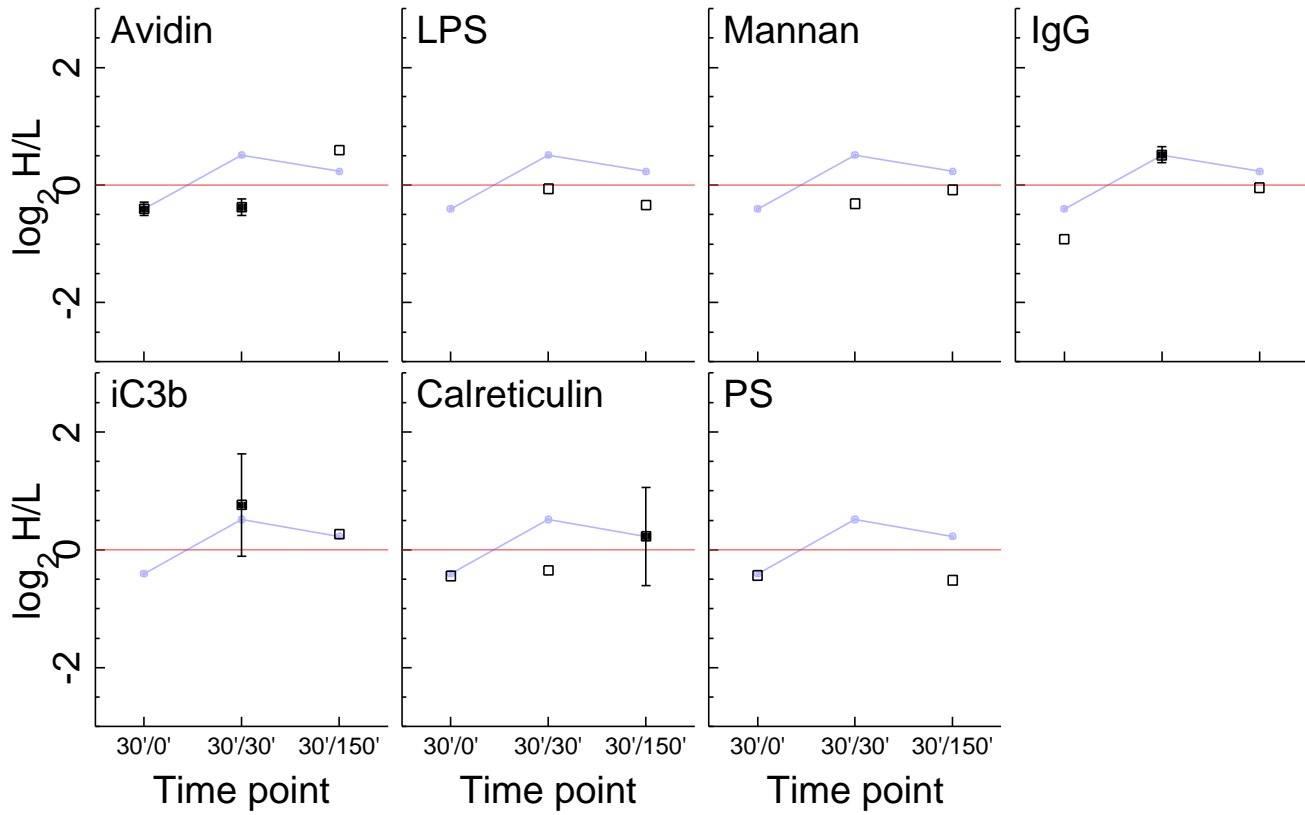

banf1 (O54962)

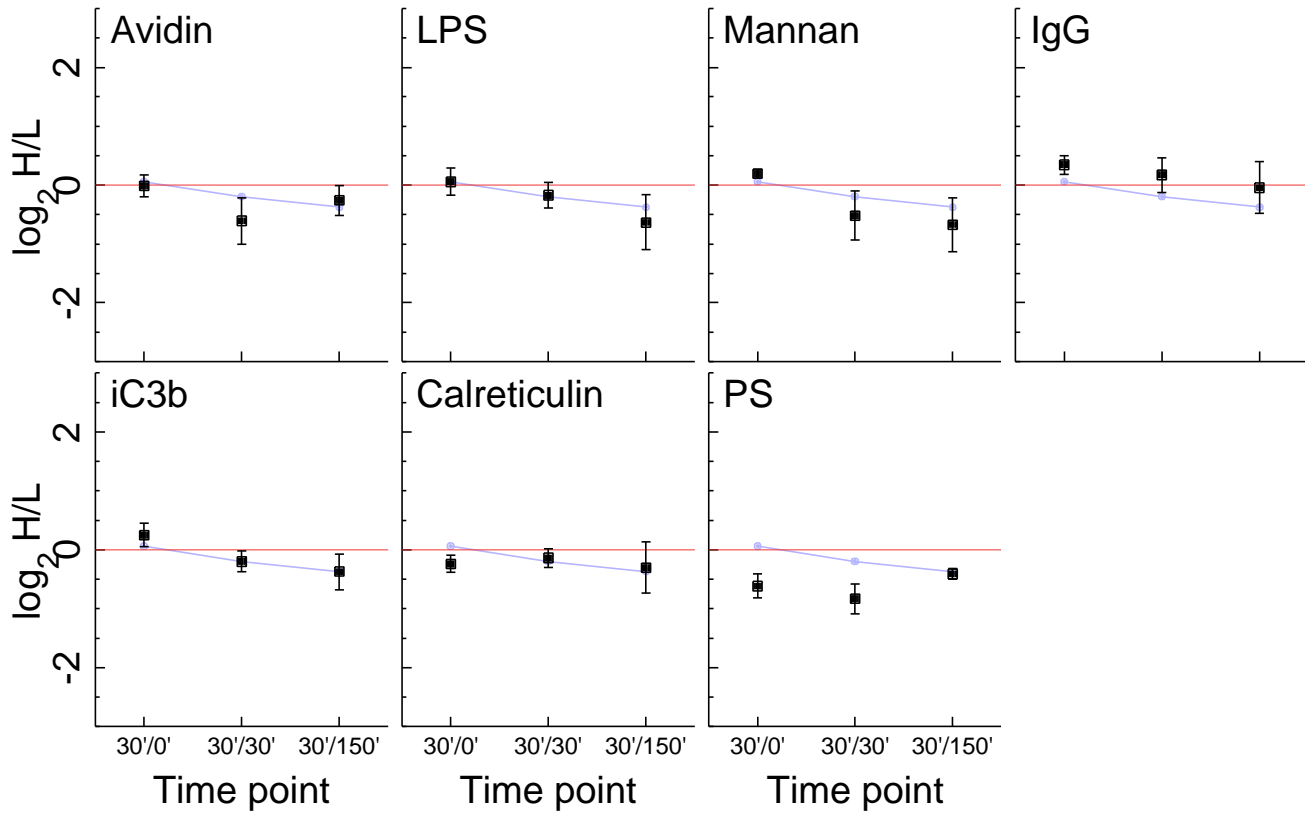



### basp1 (Q91XV3)

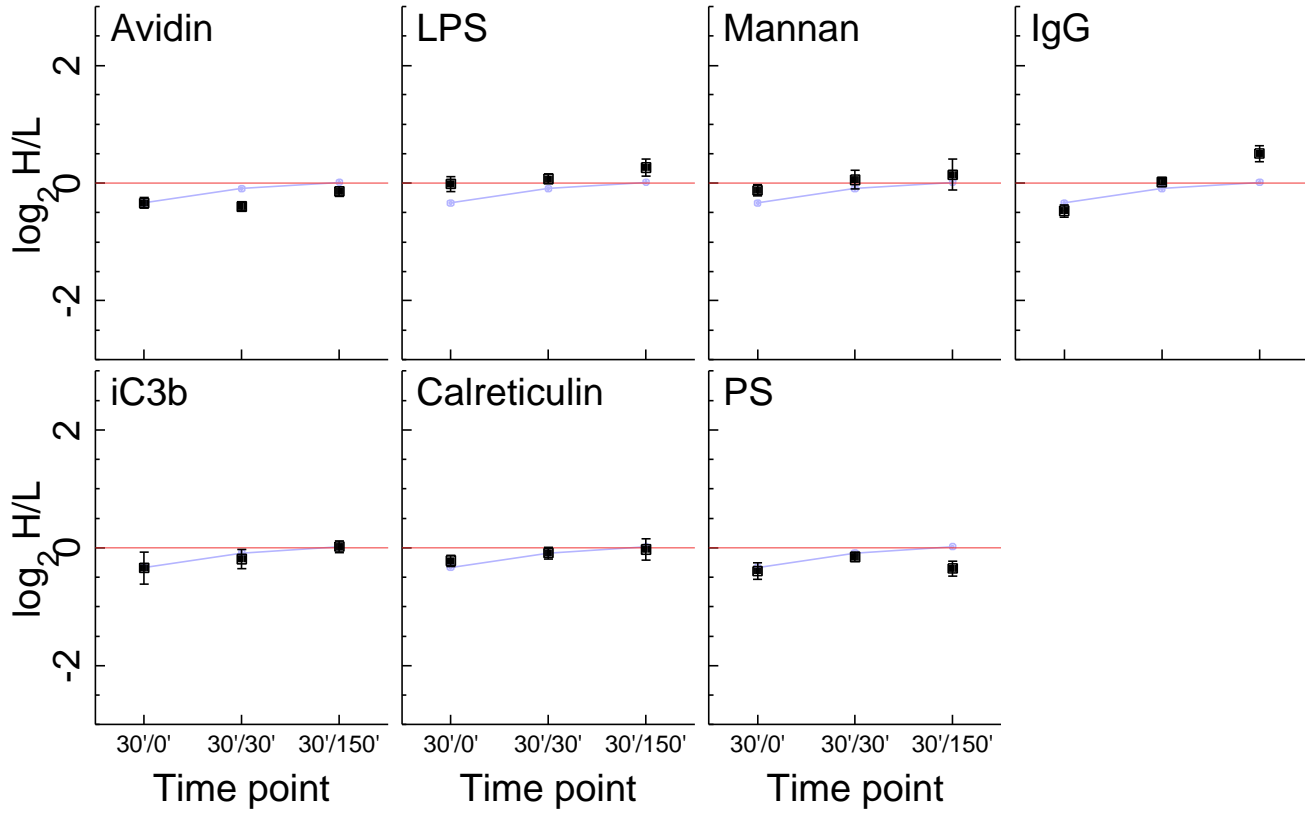

bax (Q07813)

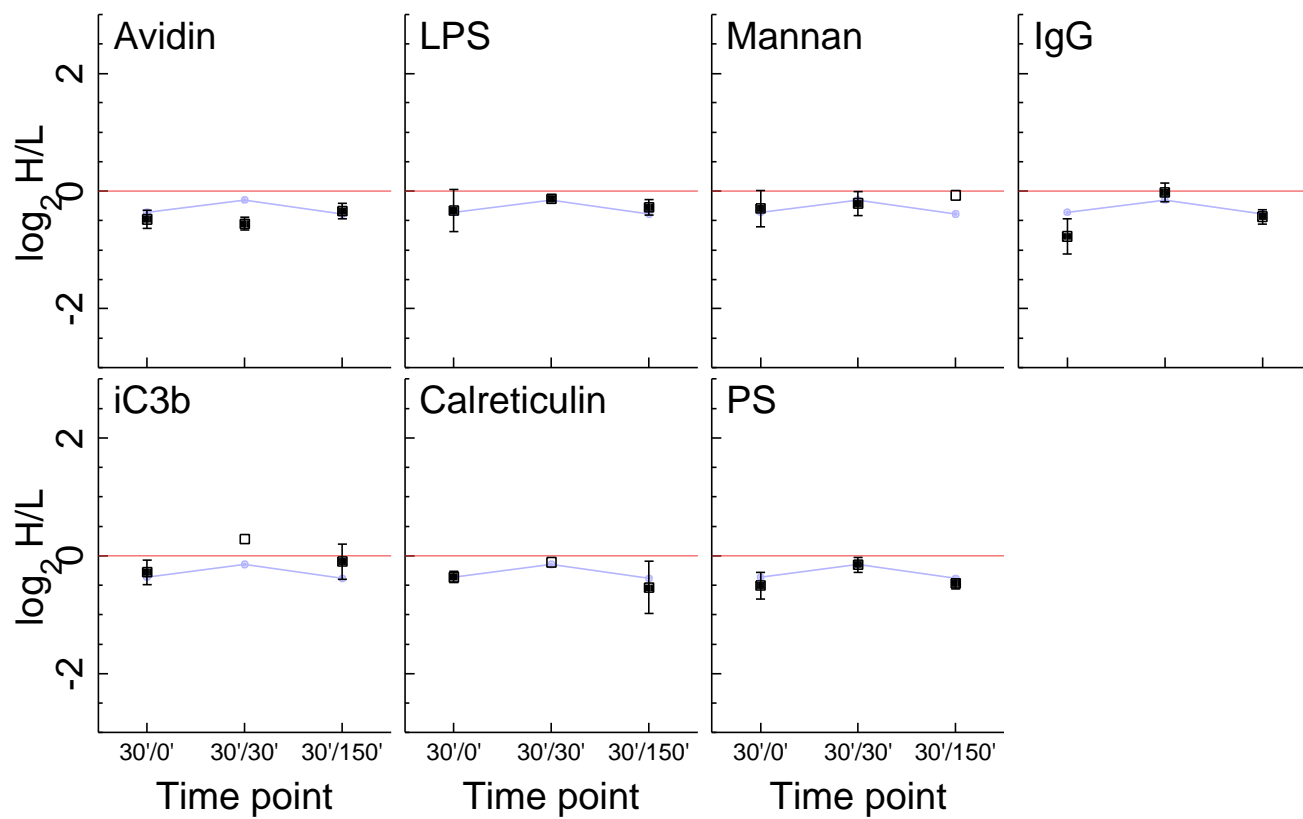

bc017647 (Q6P539)

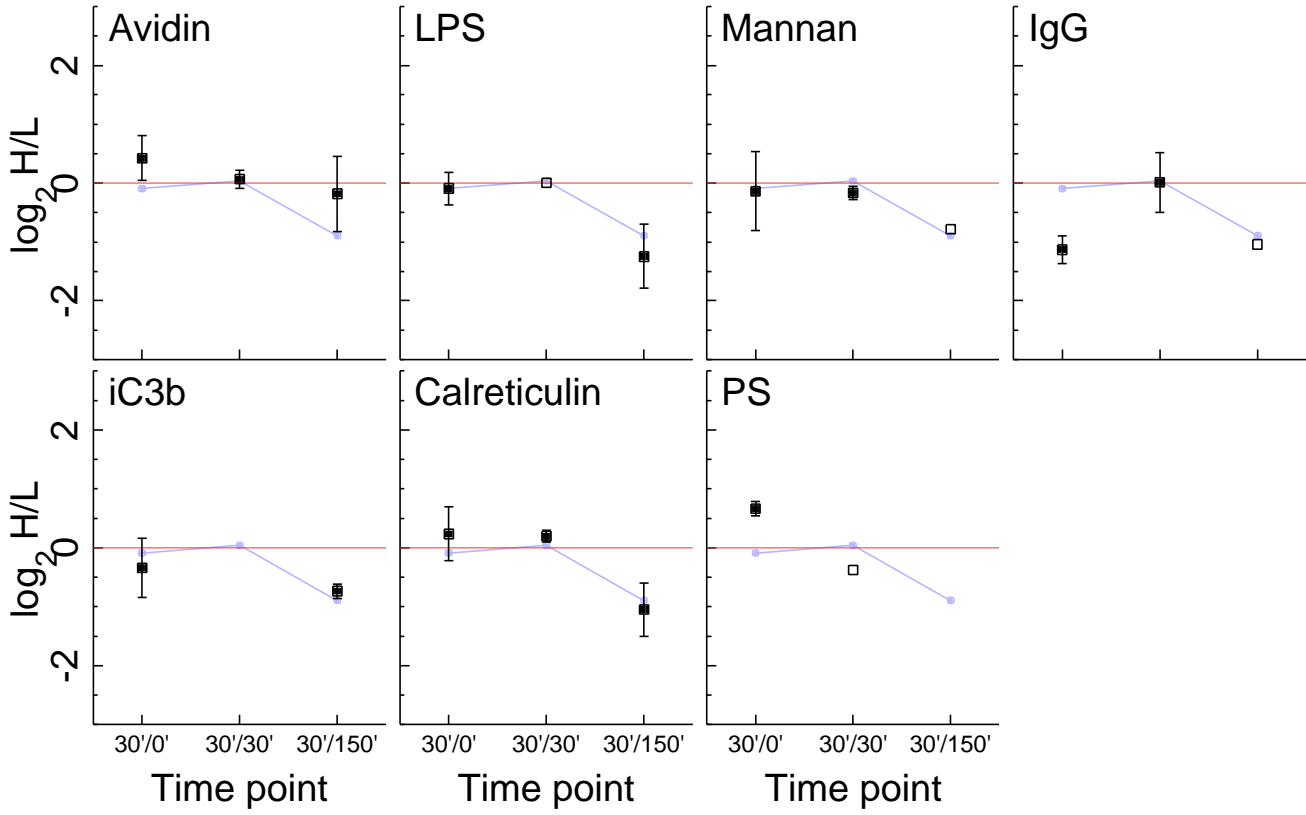

### bcap31 (Q61335)

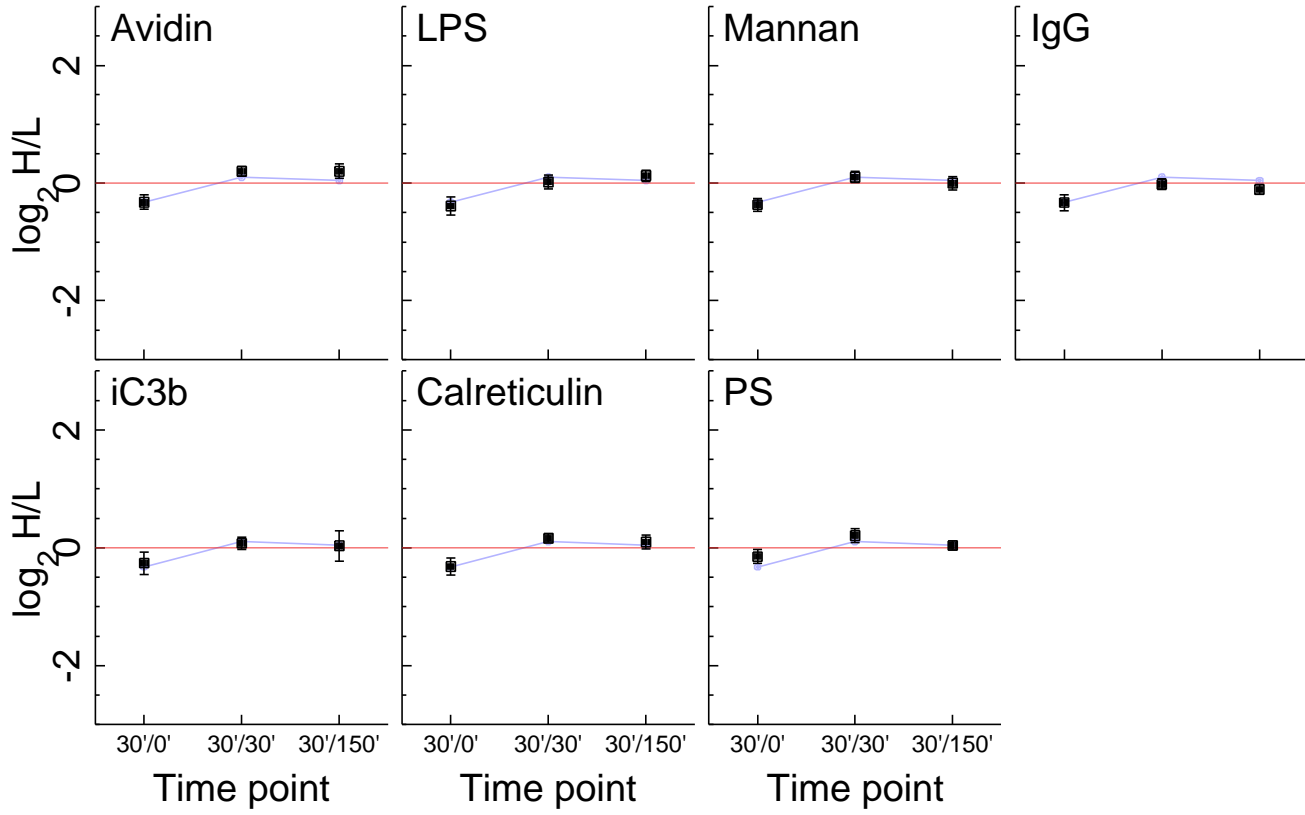

### bcat2 (O35855)

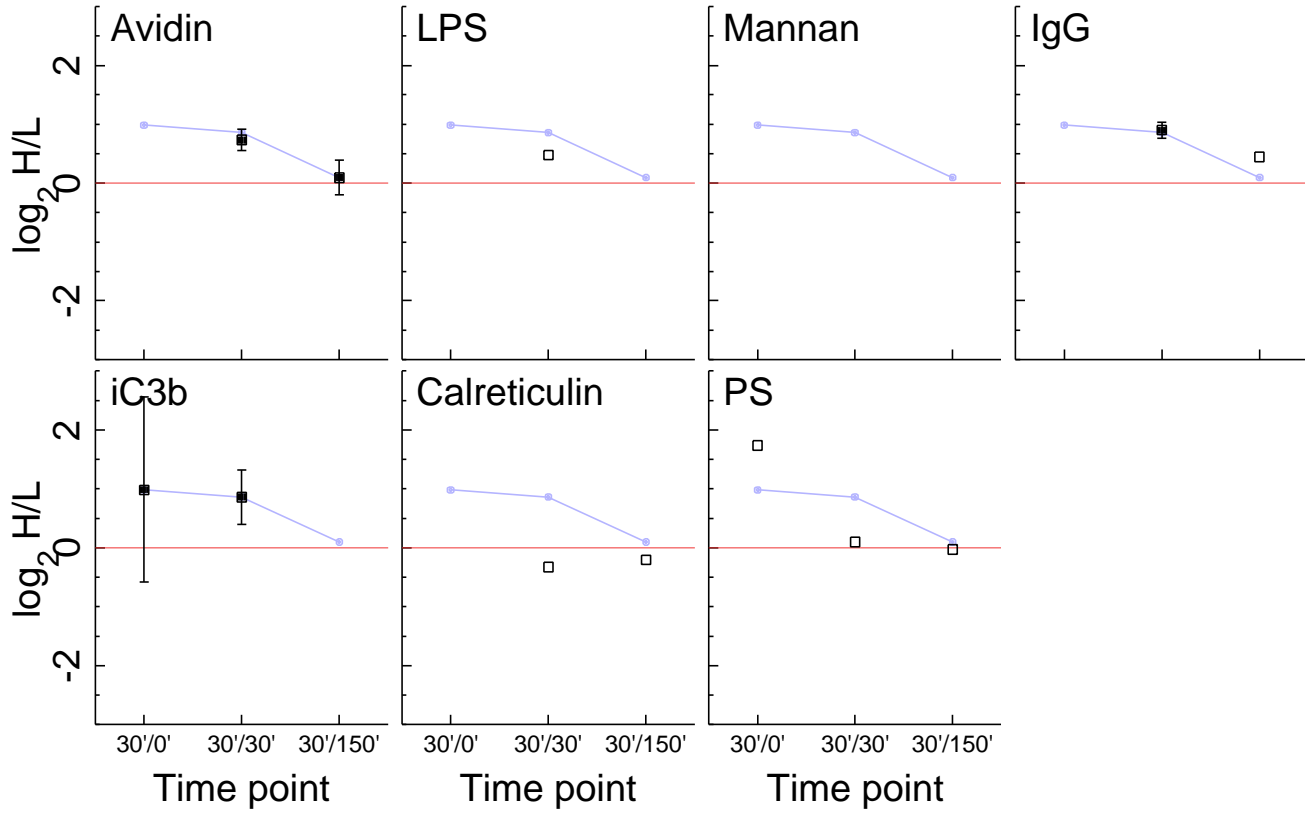

### bcl7b (Q921K9)

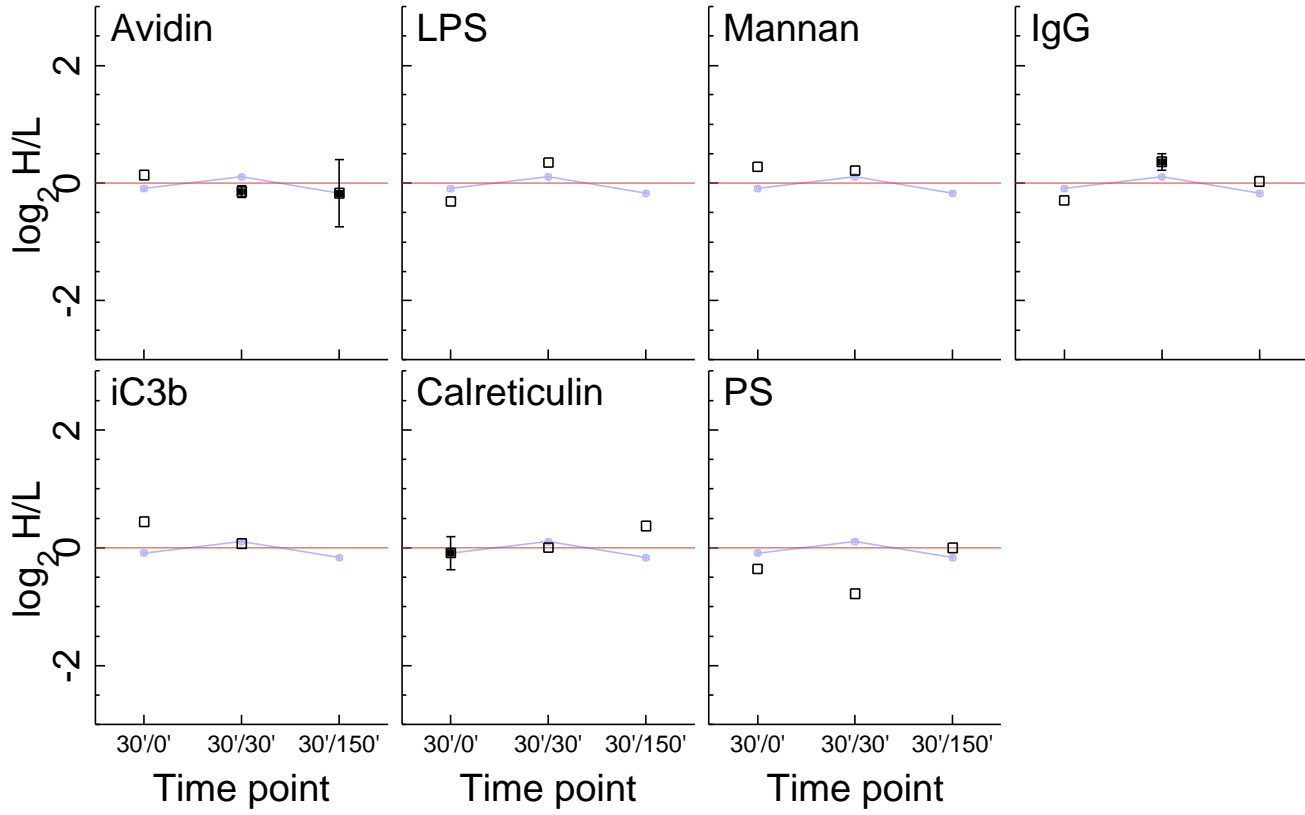

### bclaf1 (Q8K019)

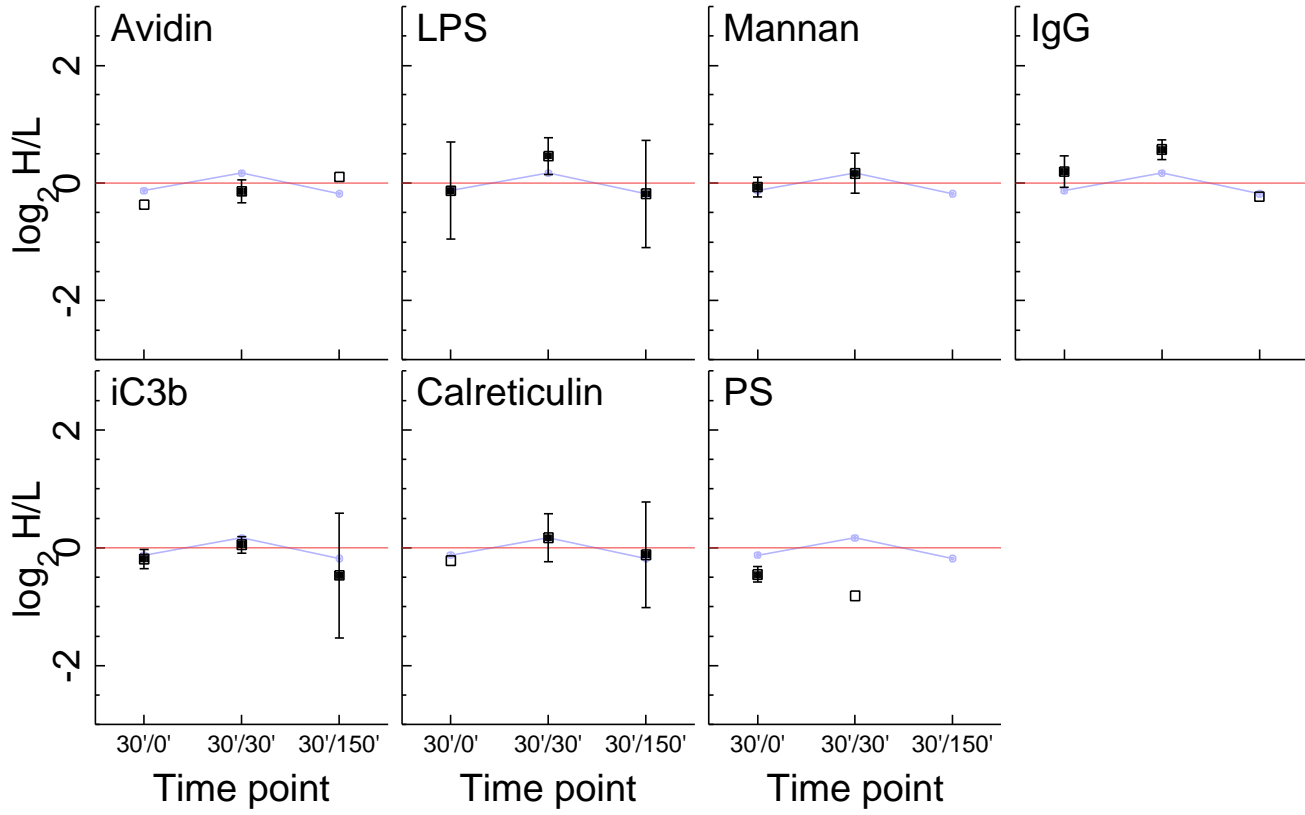

becn1 (O88597)

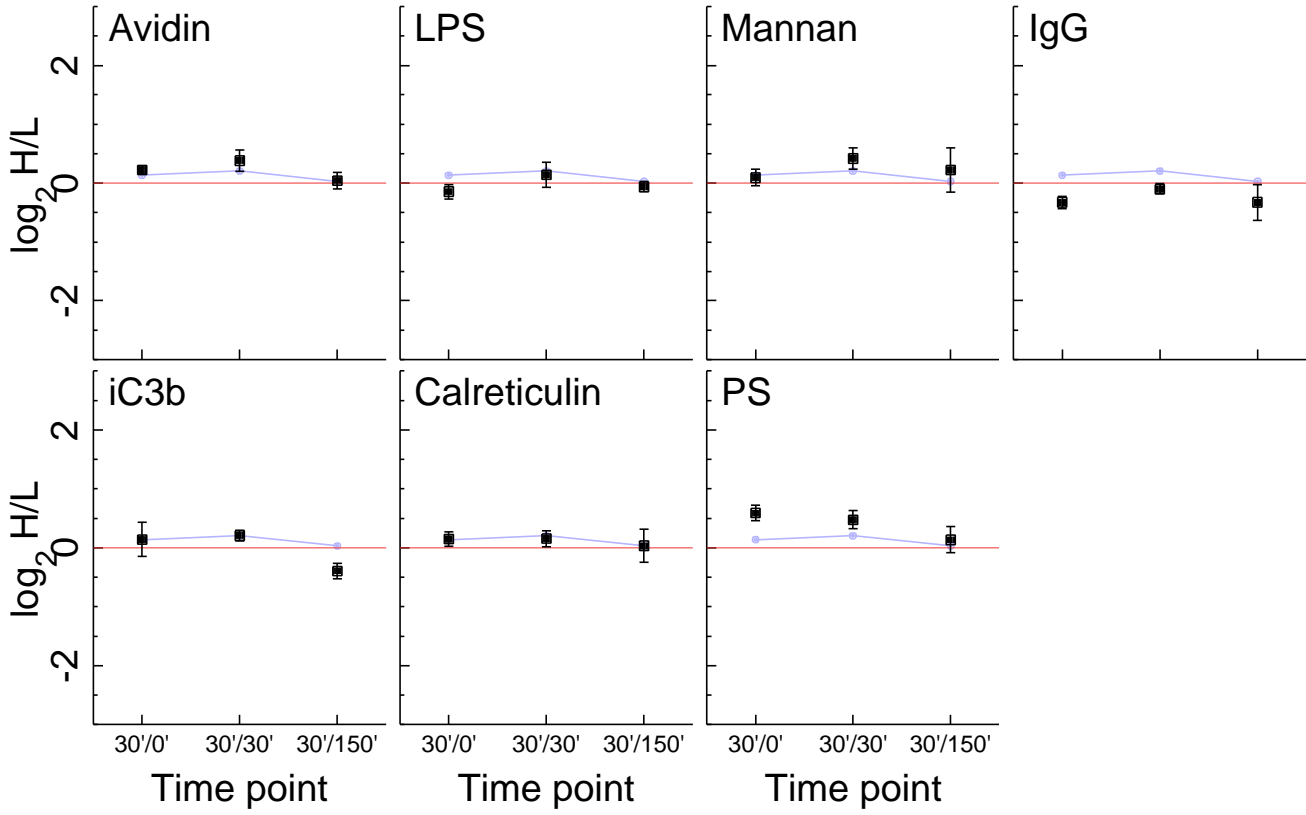



### bin1 (O08539)

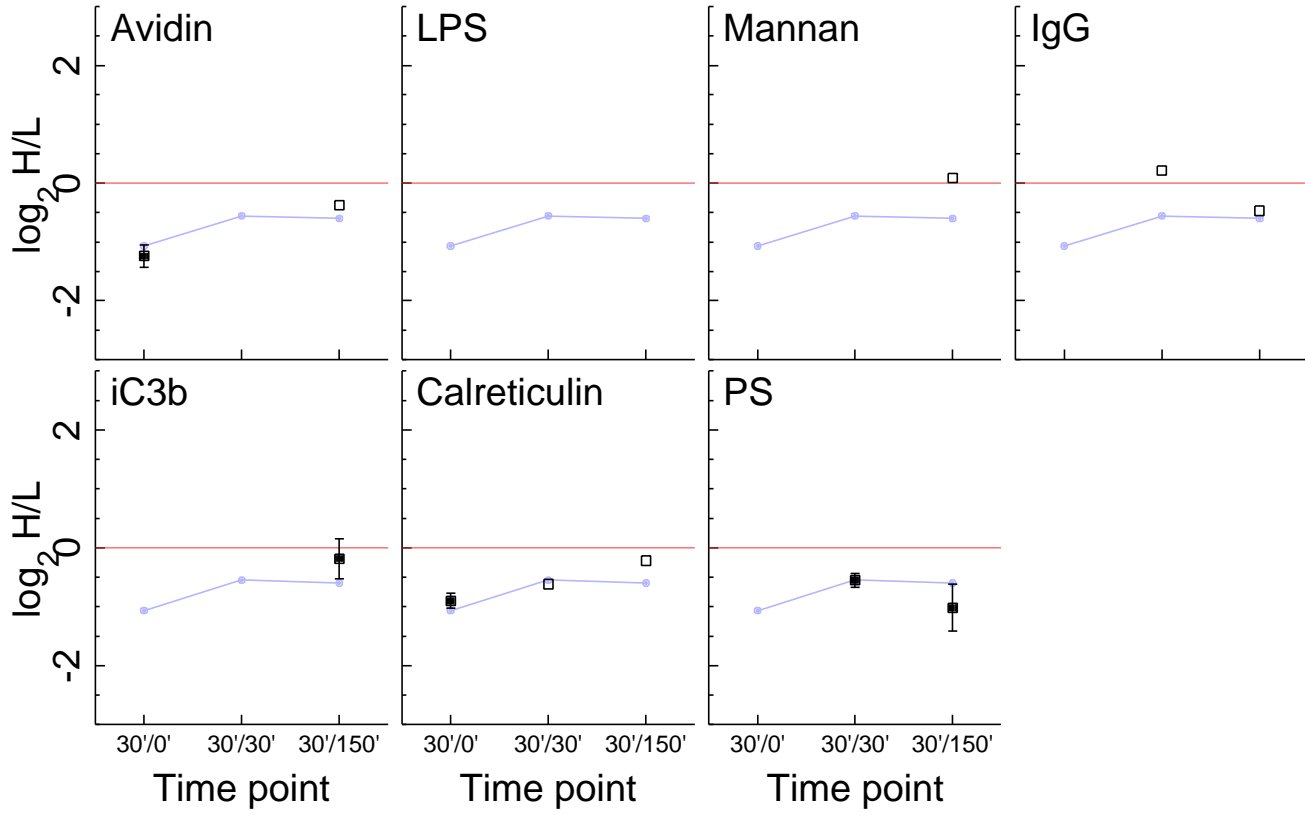

bin2 (D3Z6Q9)

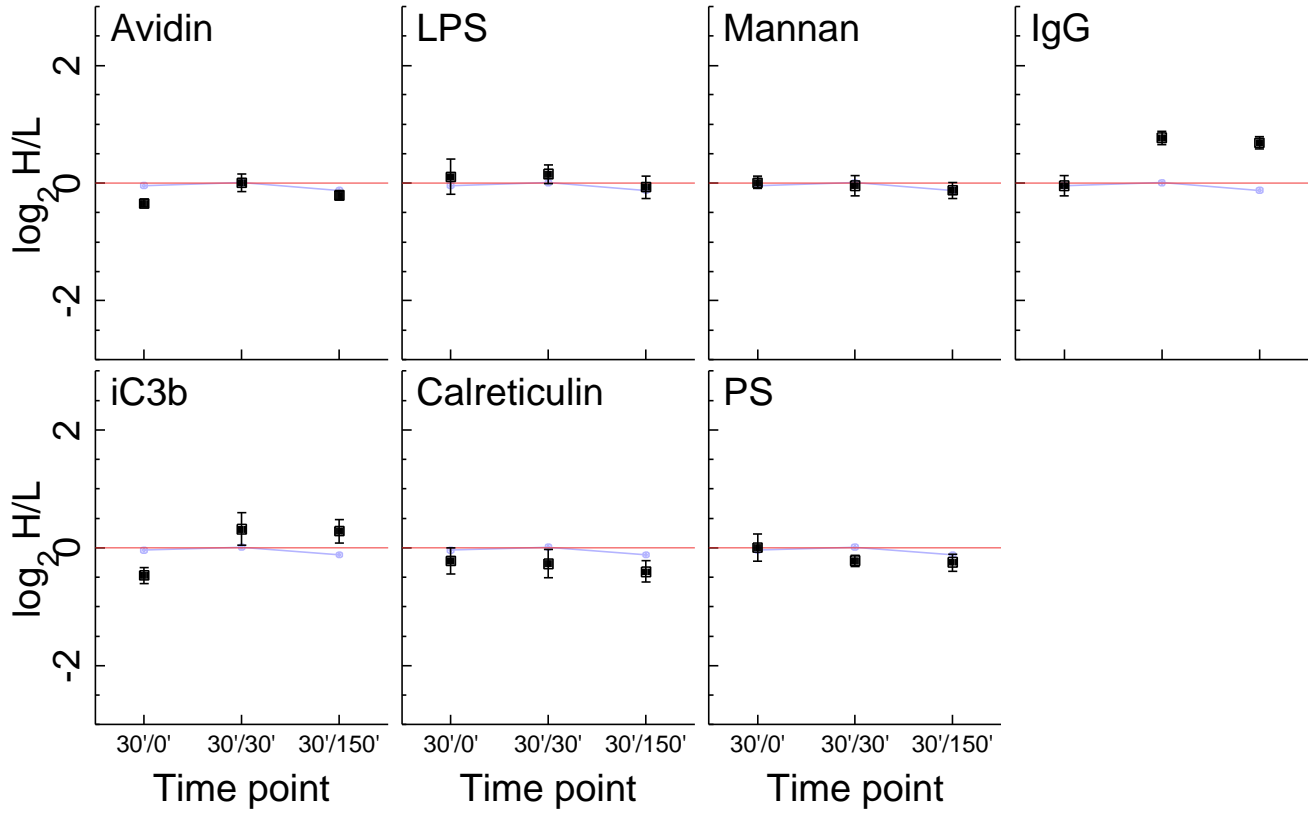

### birc6 (O88738)

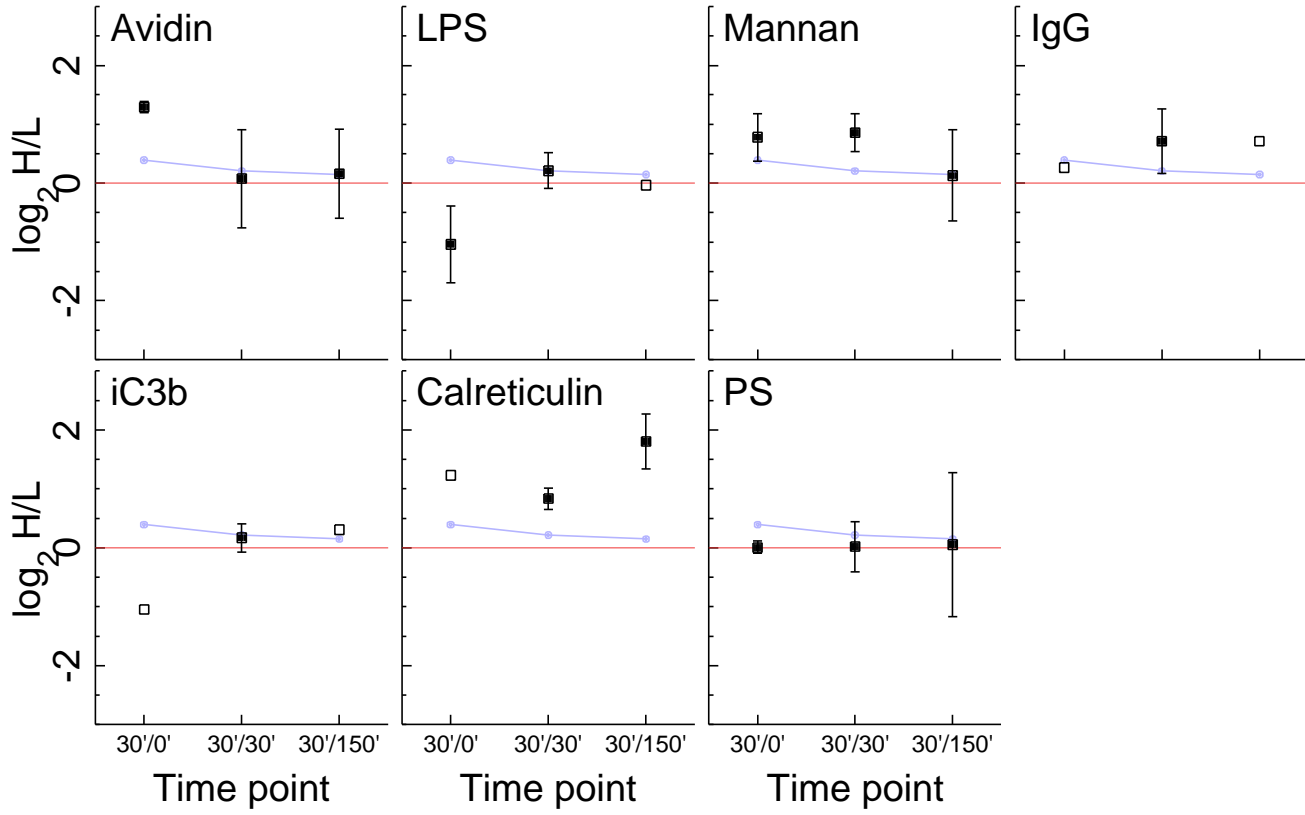

blmh (Q8R016)

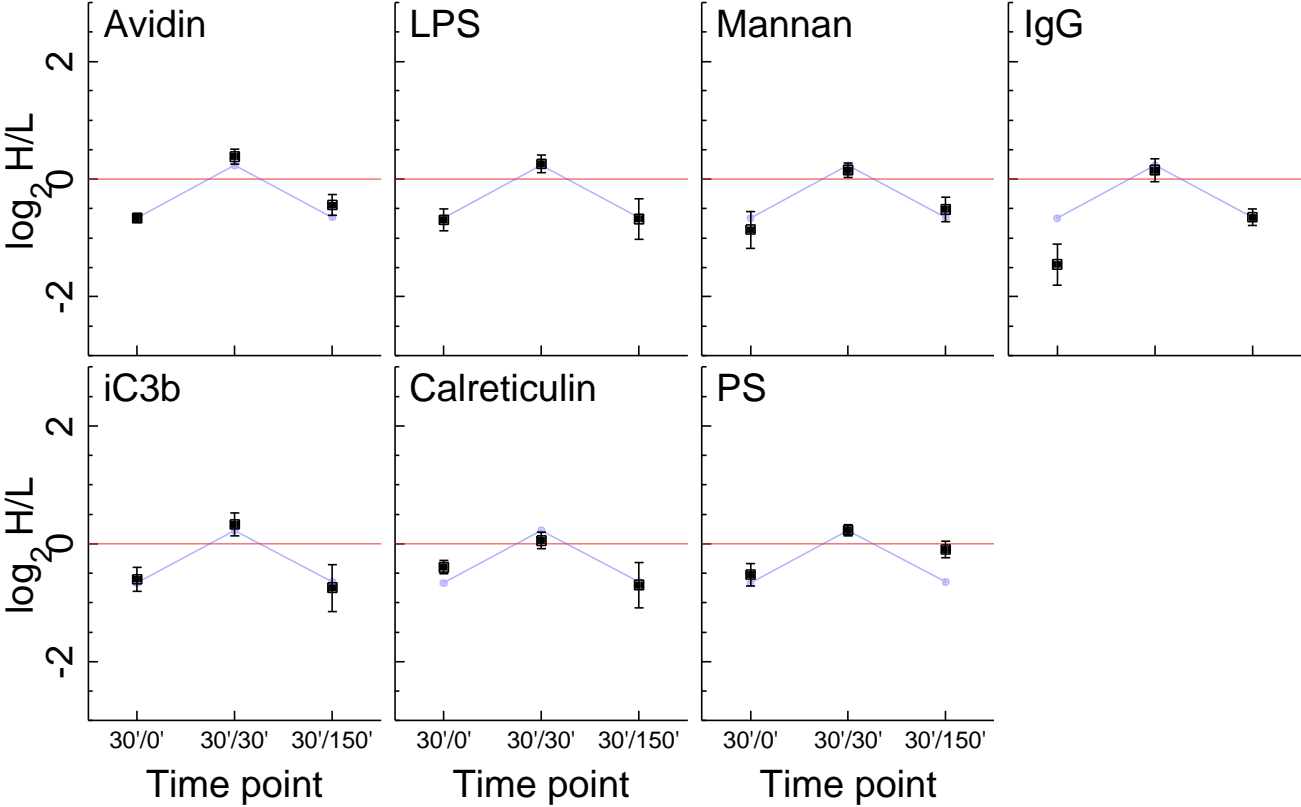

### blnk (Q9QUN3)

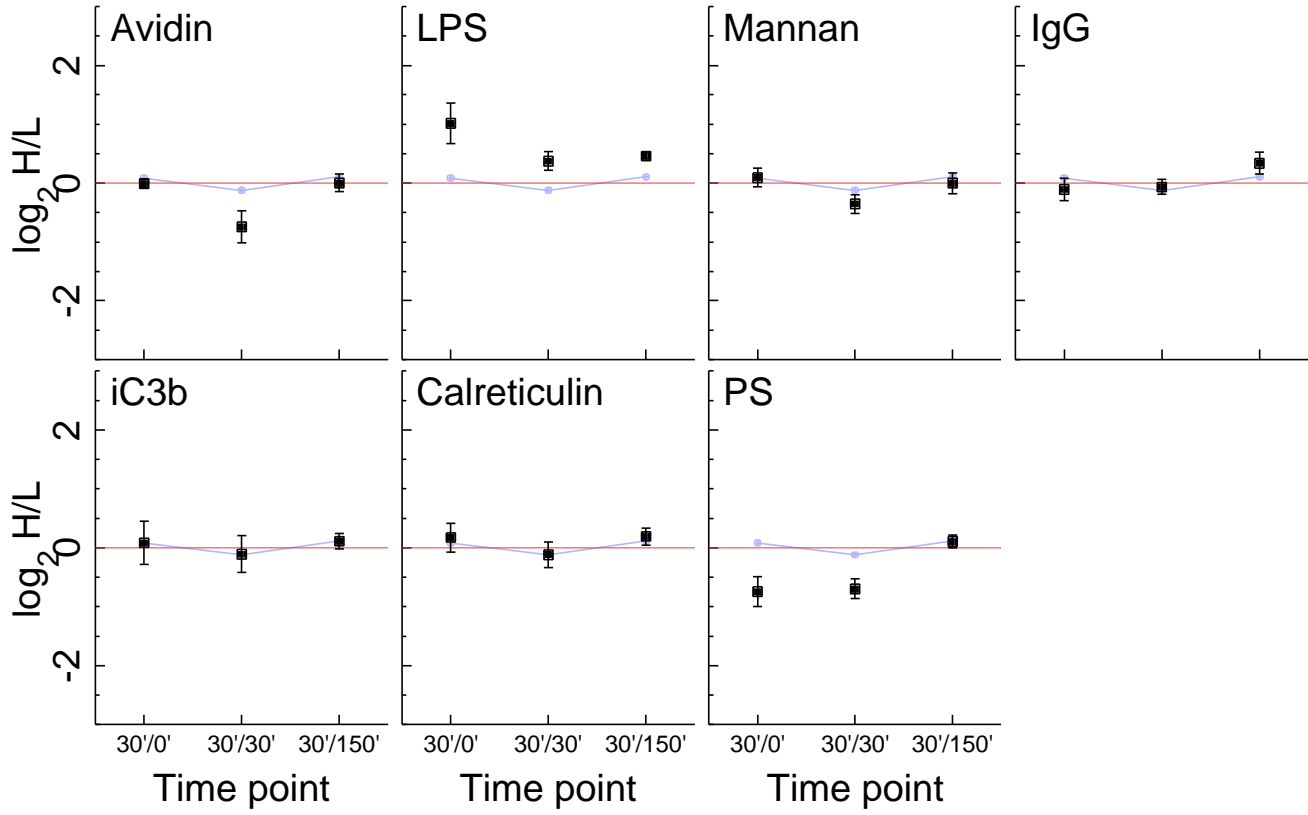

bloc1s1 (O55102)

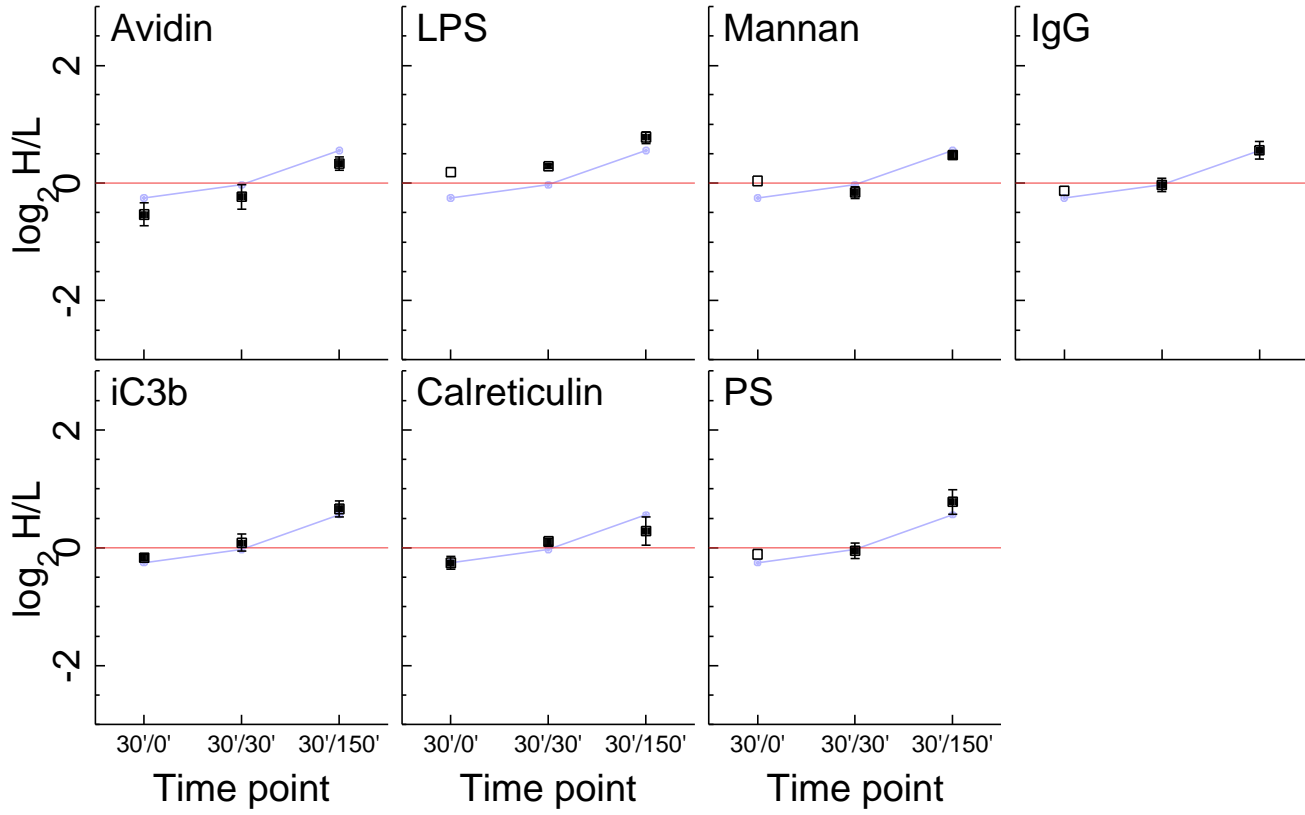

blvrb (E9PZC3)

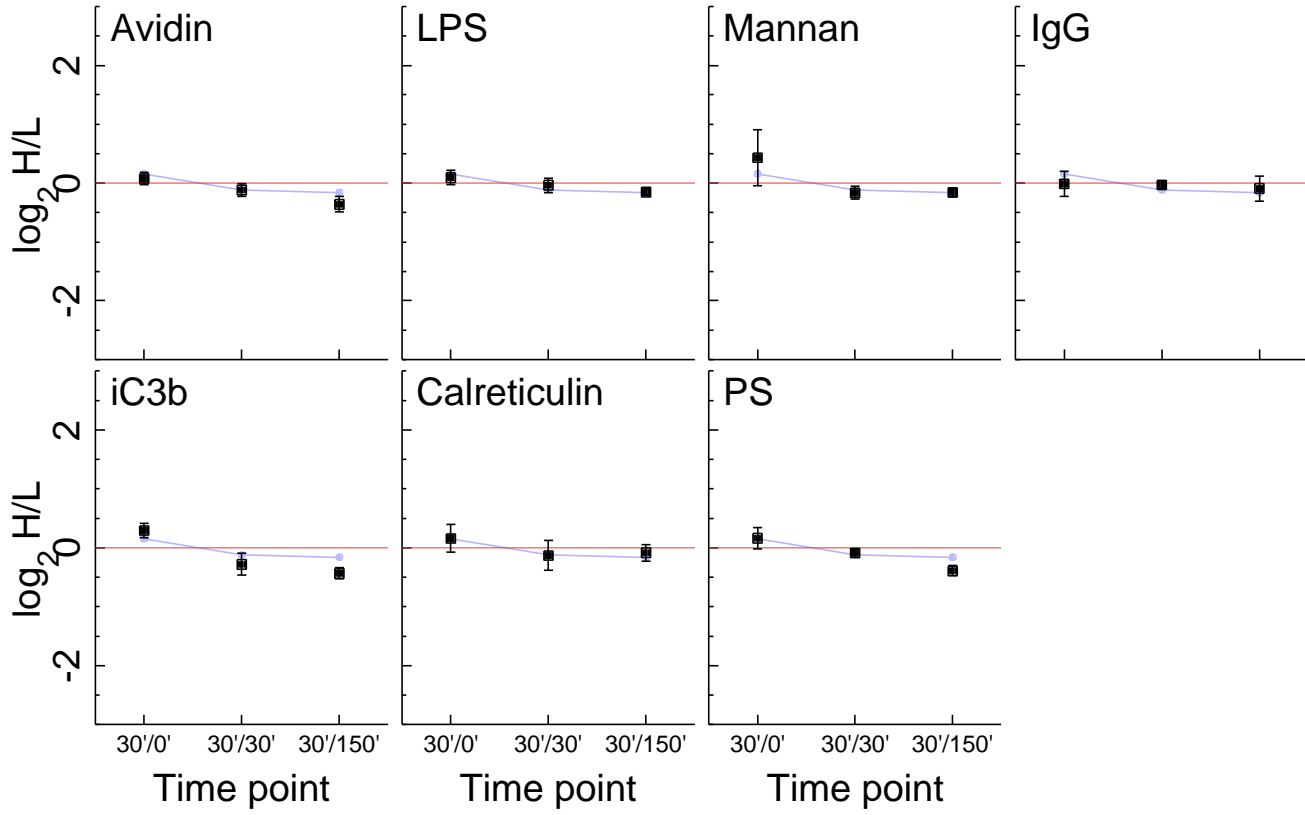

bmp2k (Q91Z96)

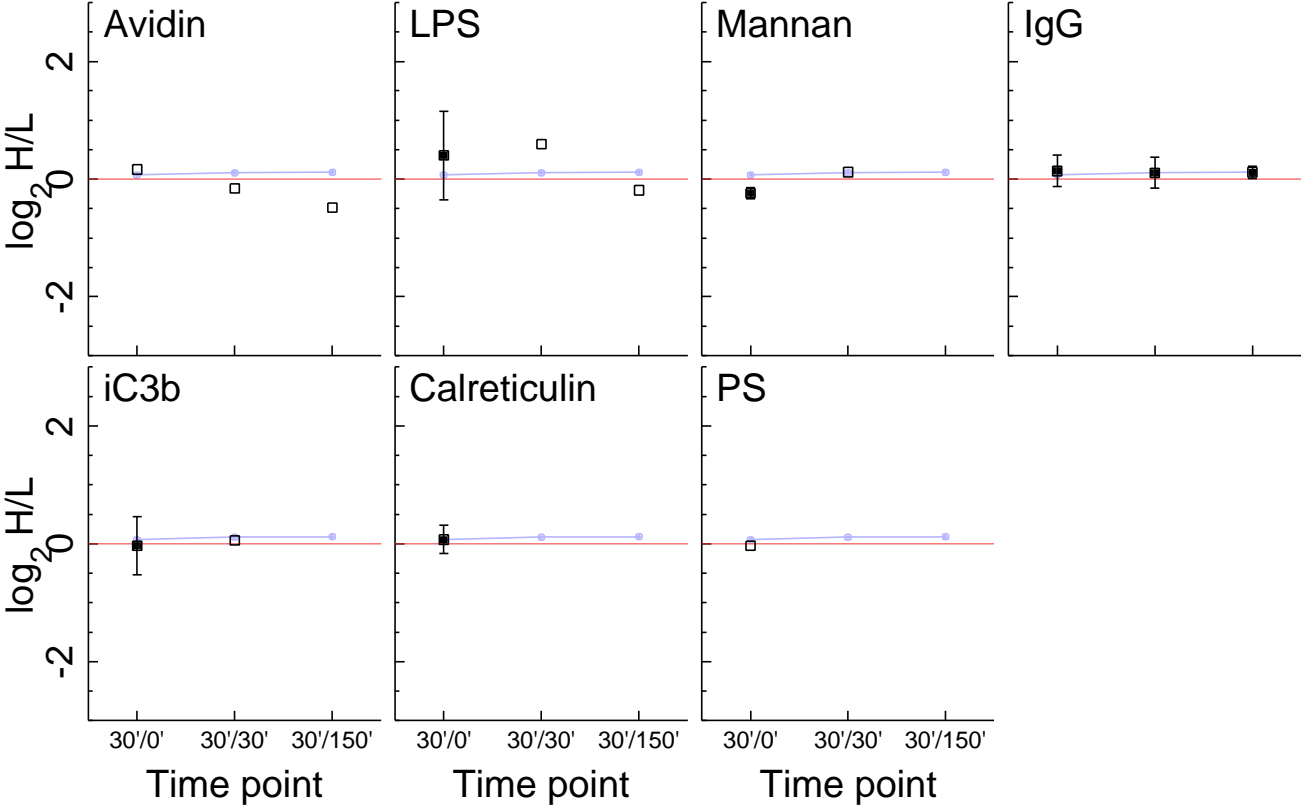



bola1 (Q9D8S9)

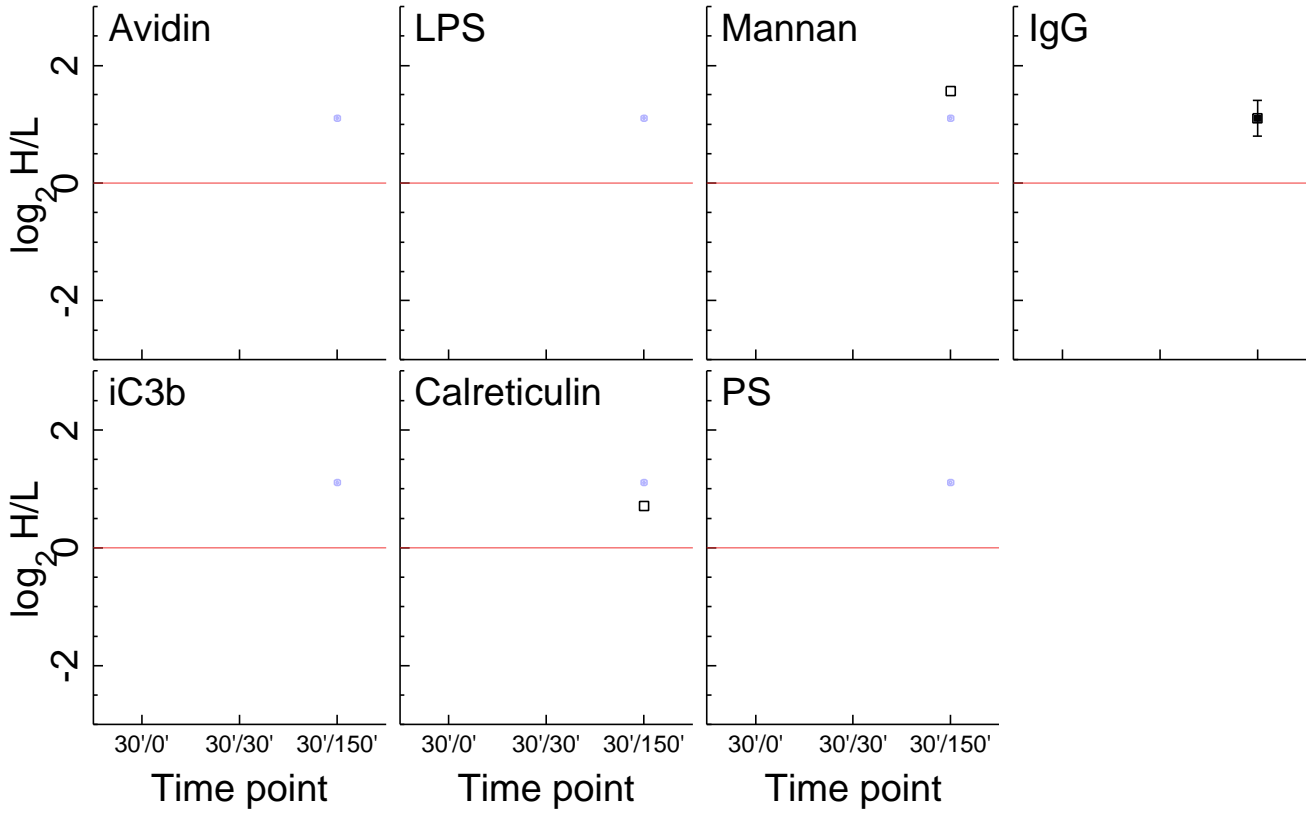

### bphl (Q8R164)

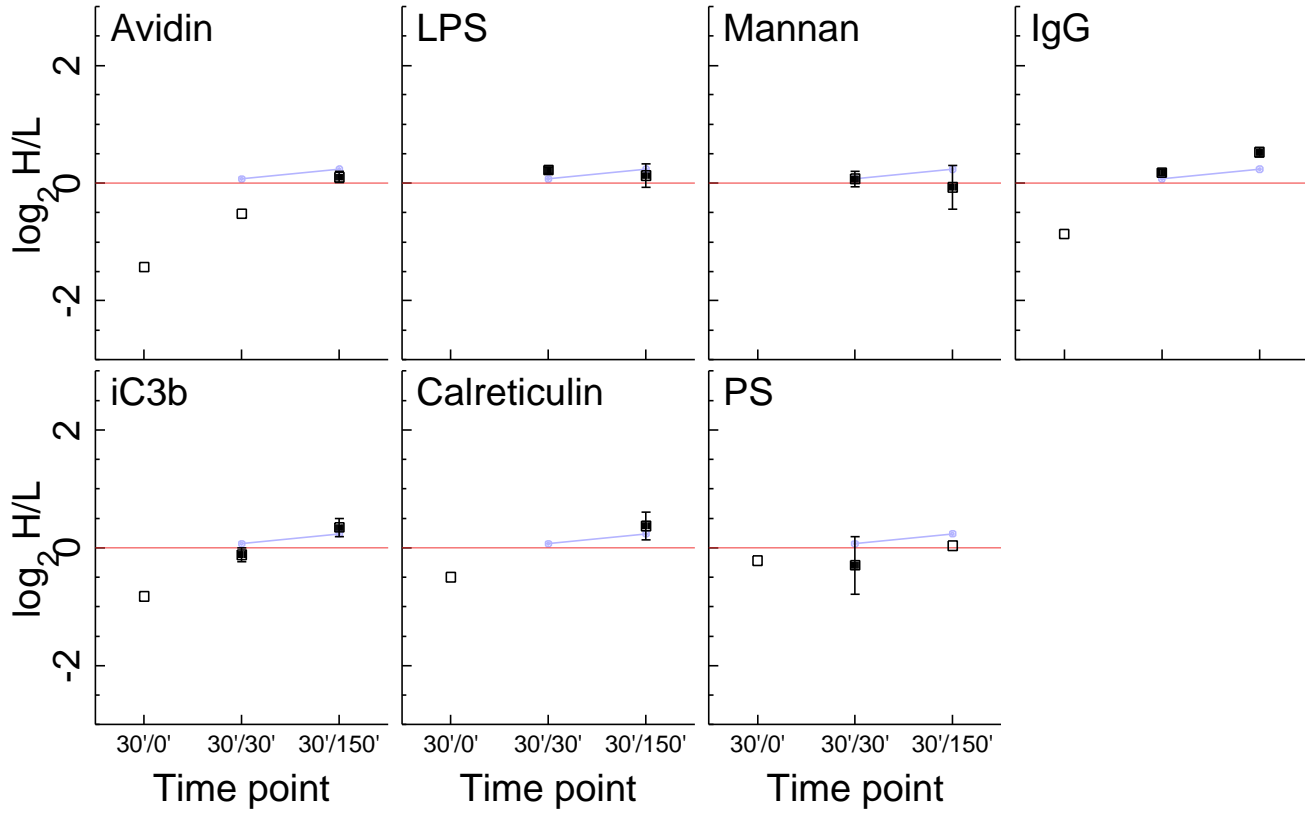

bri3 (P28662)

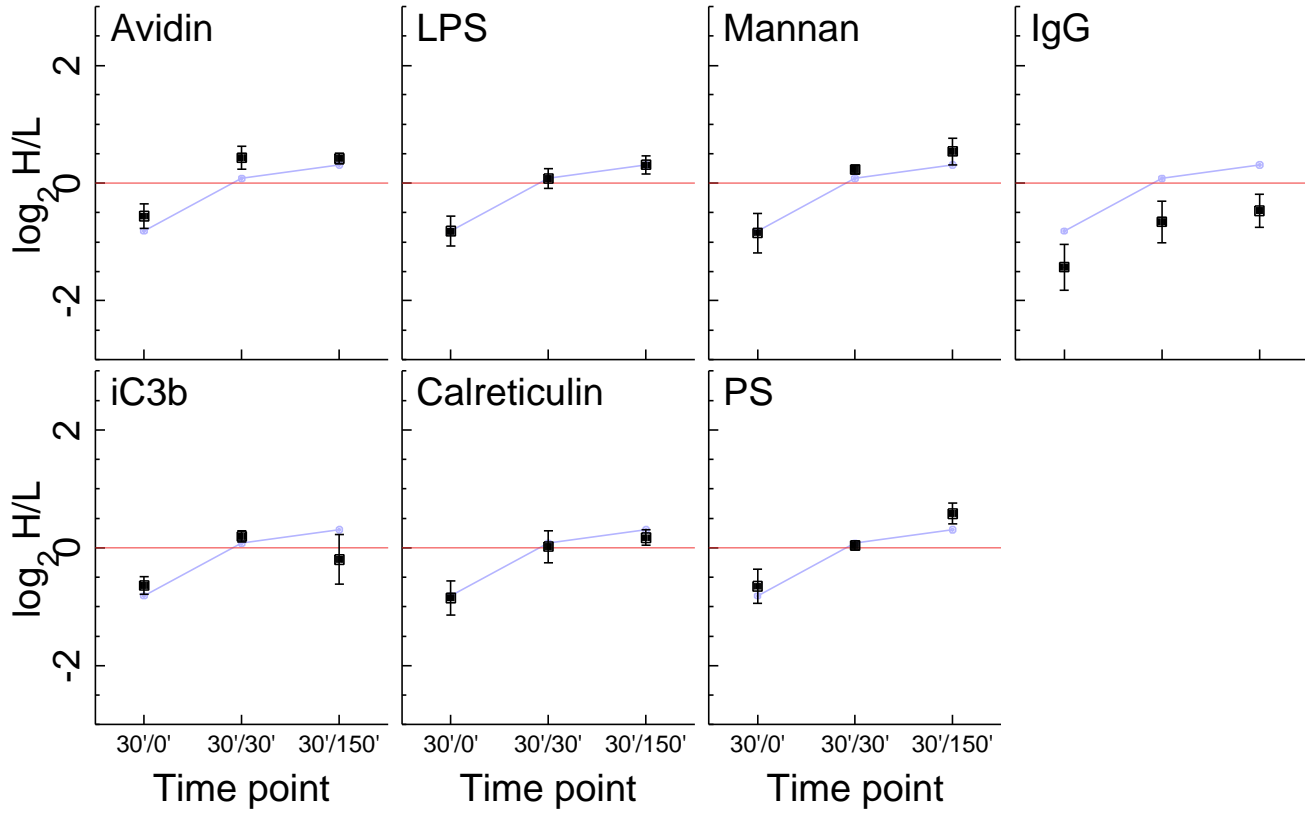

### bst1 (Q64277)

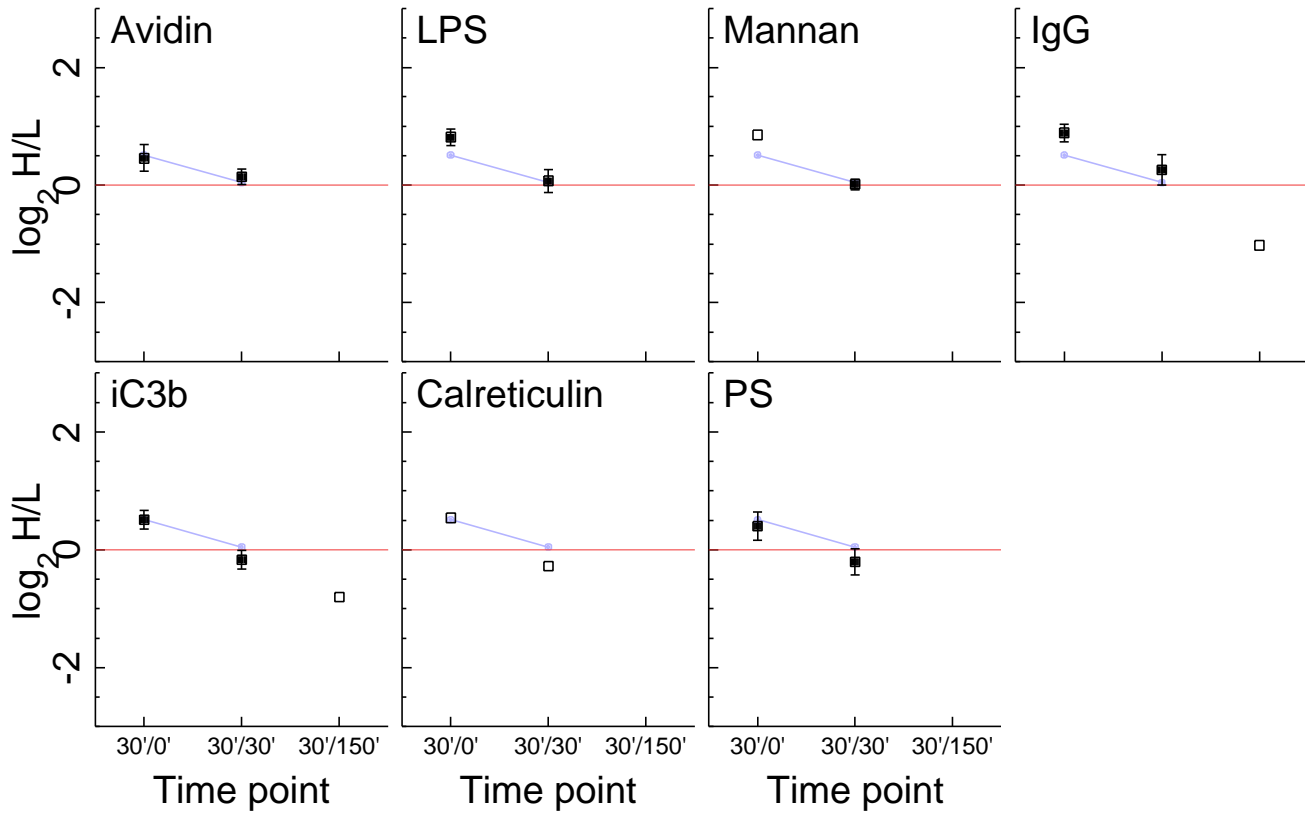

bst2 (Q8R2Q8)

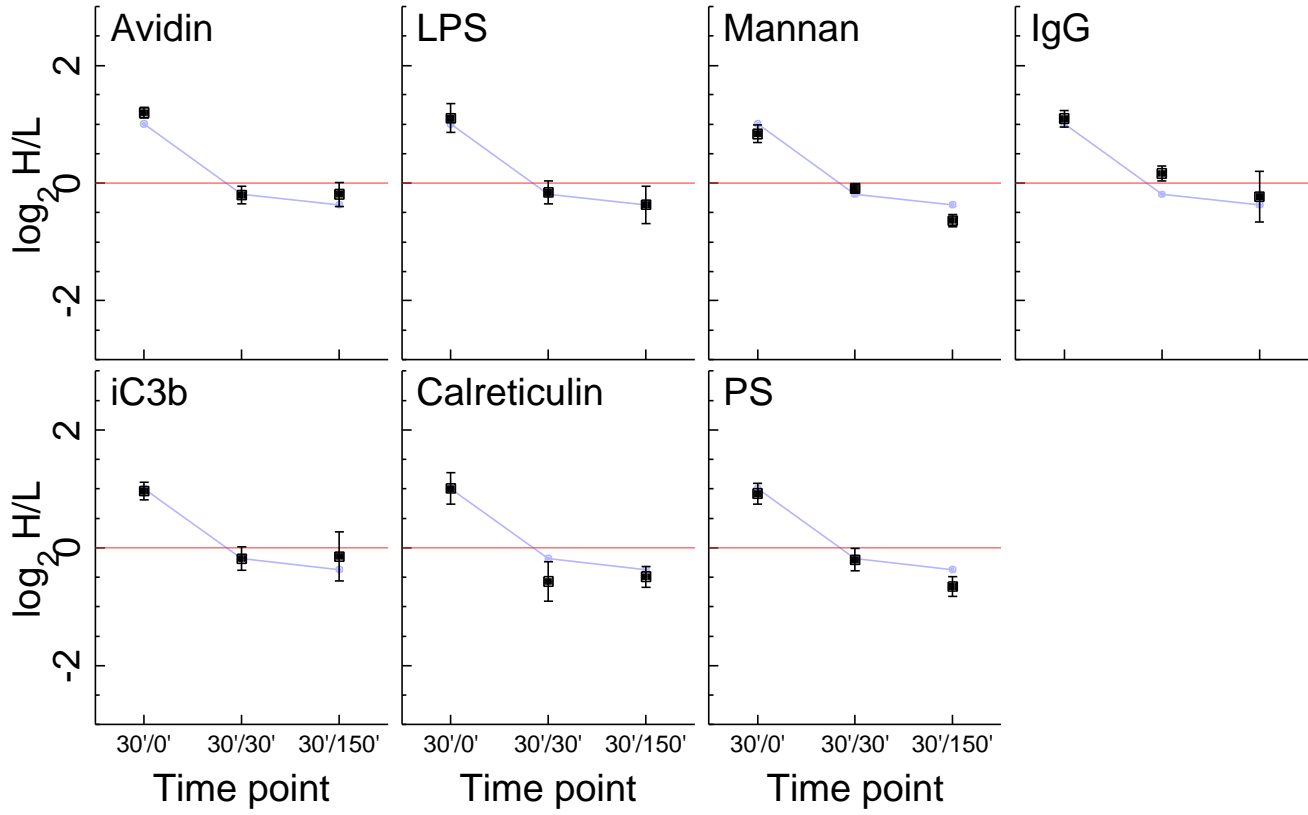

### btd (Q8CIF4)

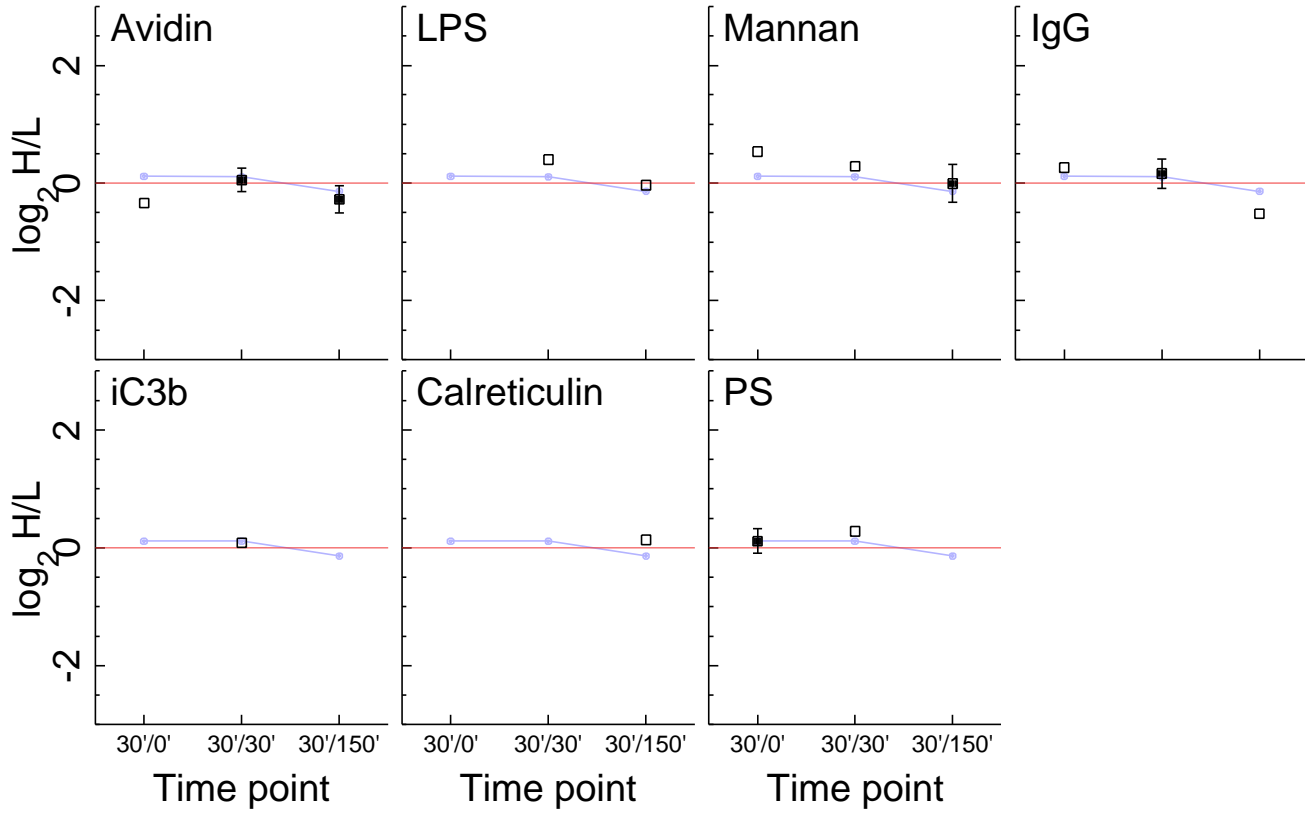

btf3 (Q64152)

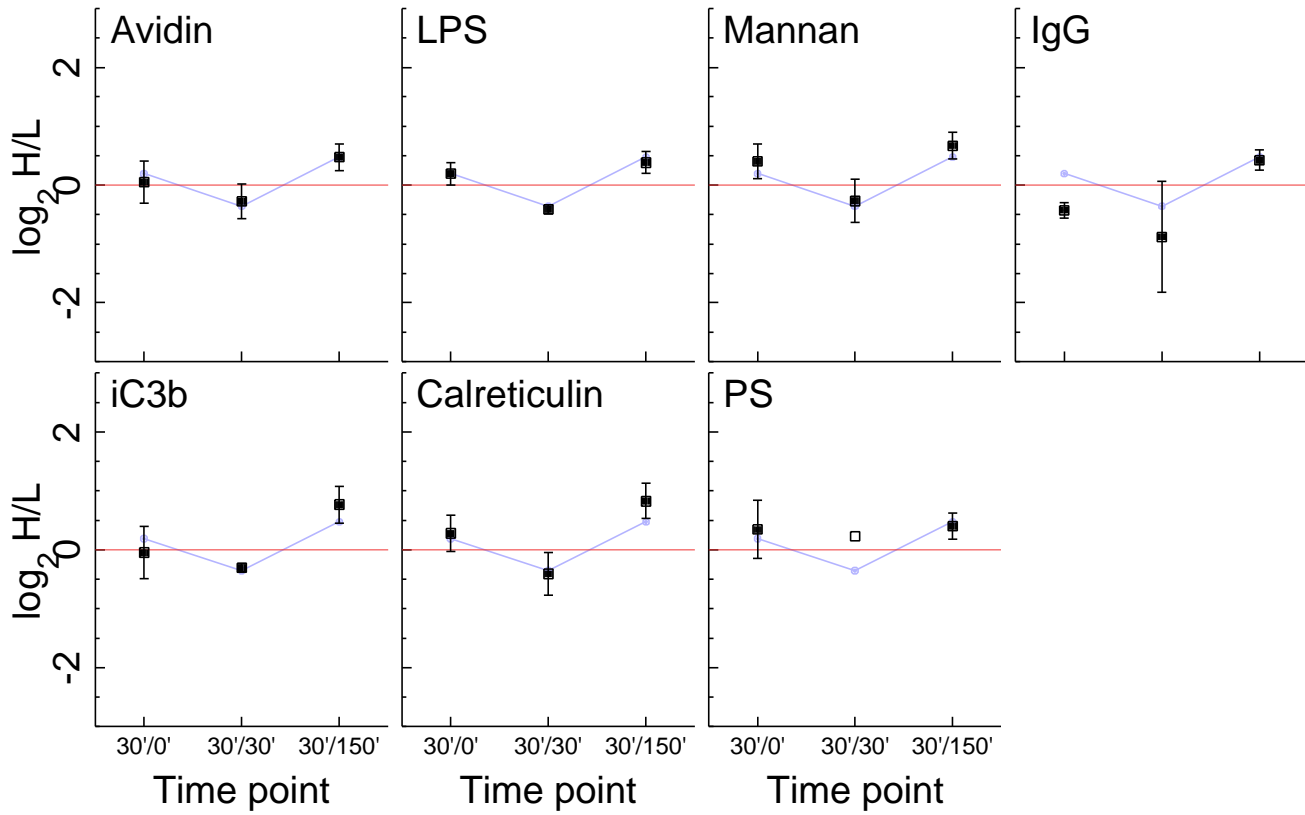

### c1qa (P98086)

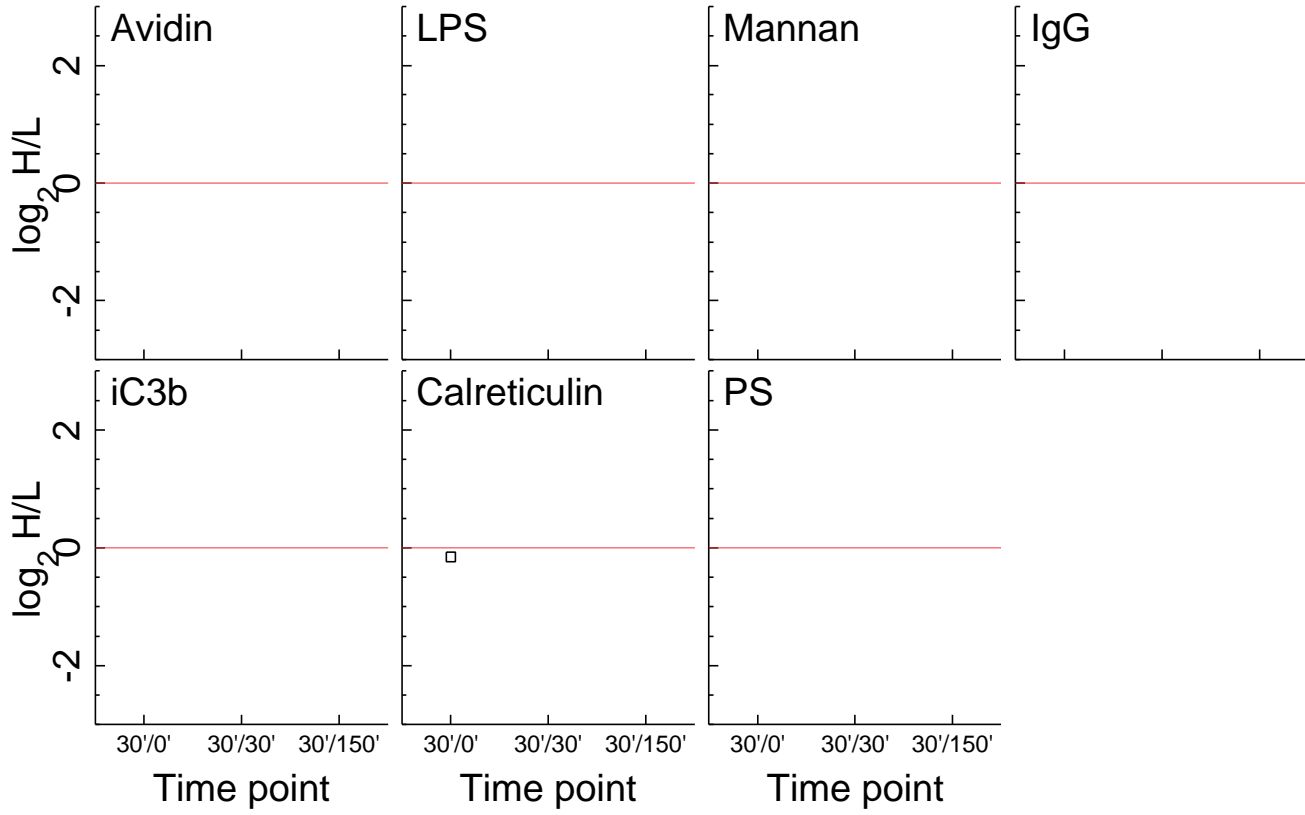



### c1qb (P14106)

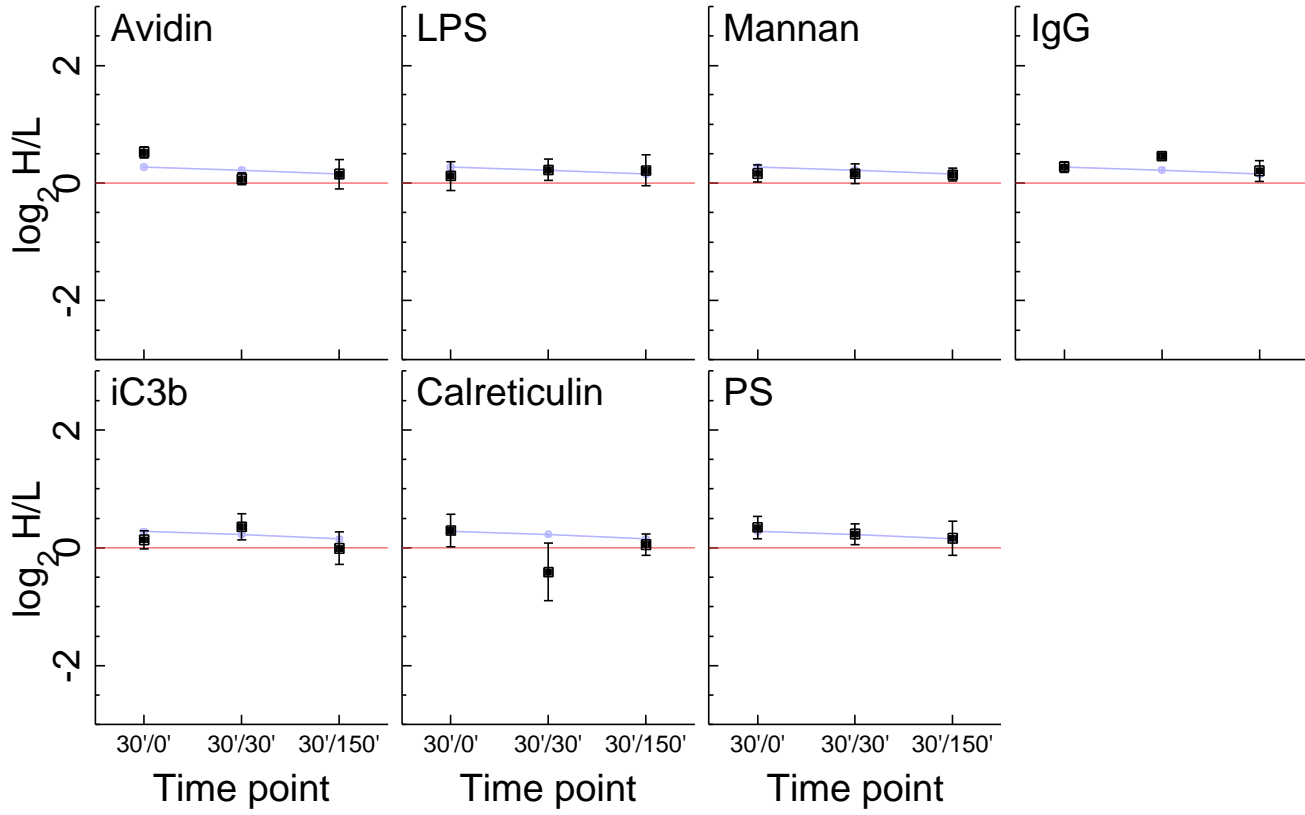

### c1qbp (Q8R5L1)

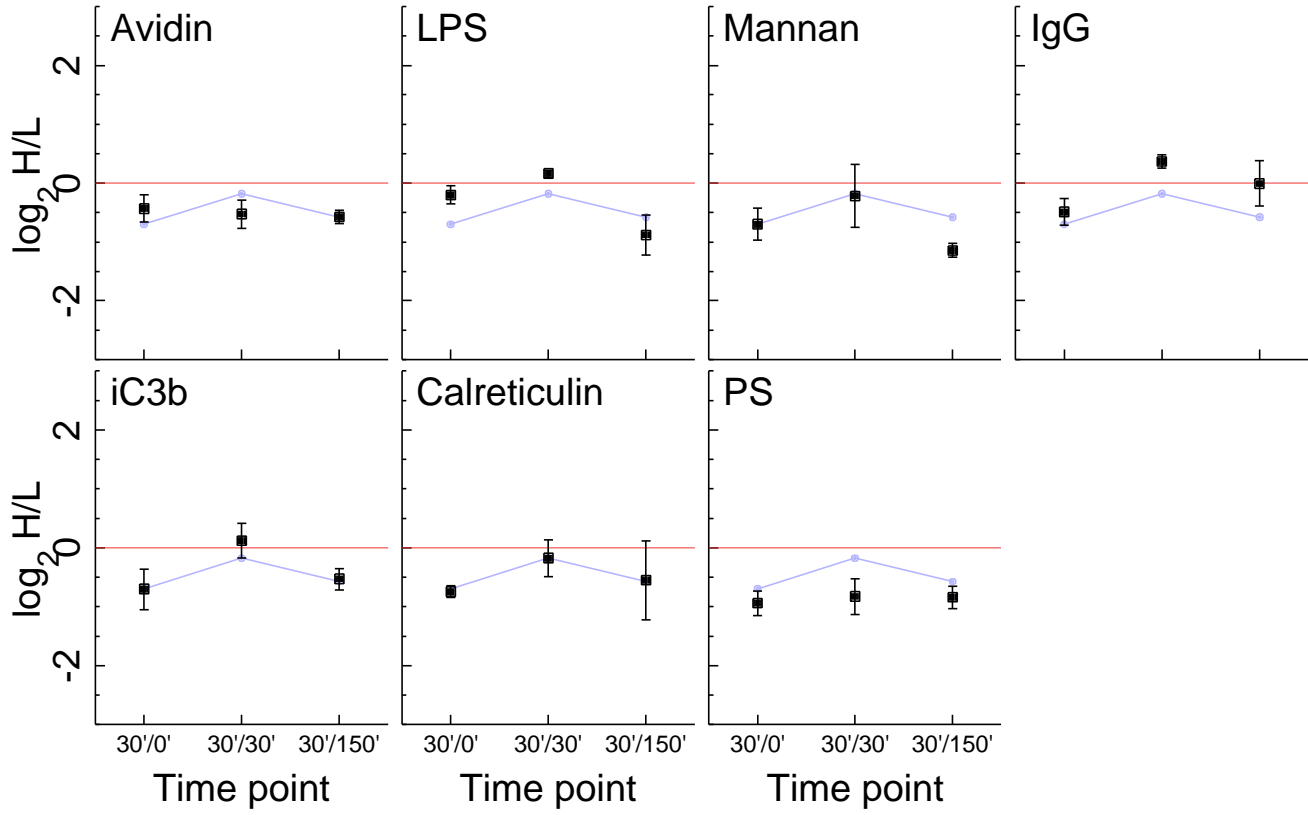

### c1qc (Q02105)

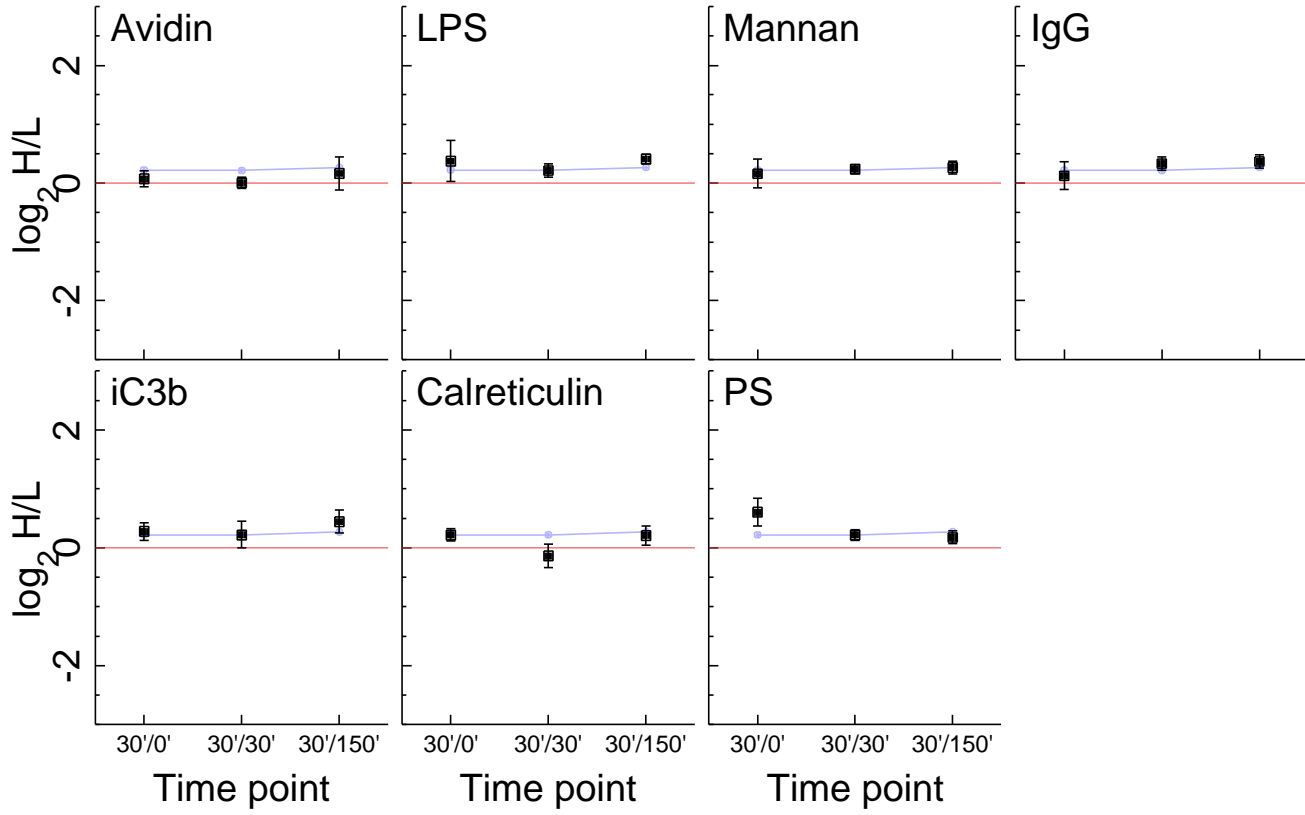

### c3ar1 (O09047)

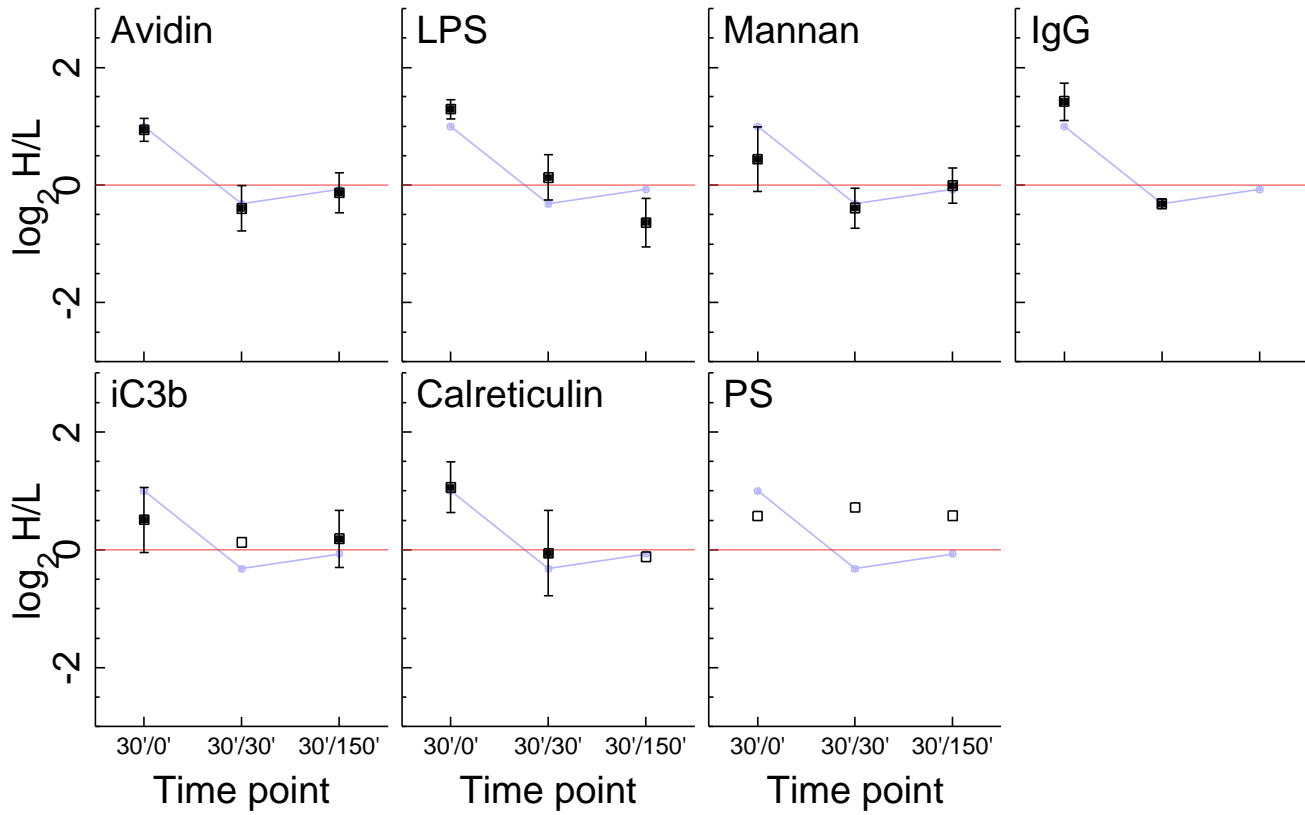

### c3 (P01027)

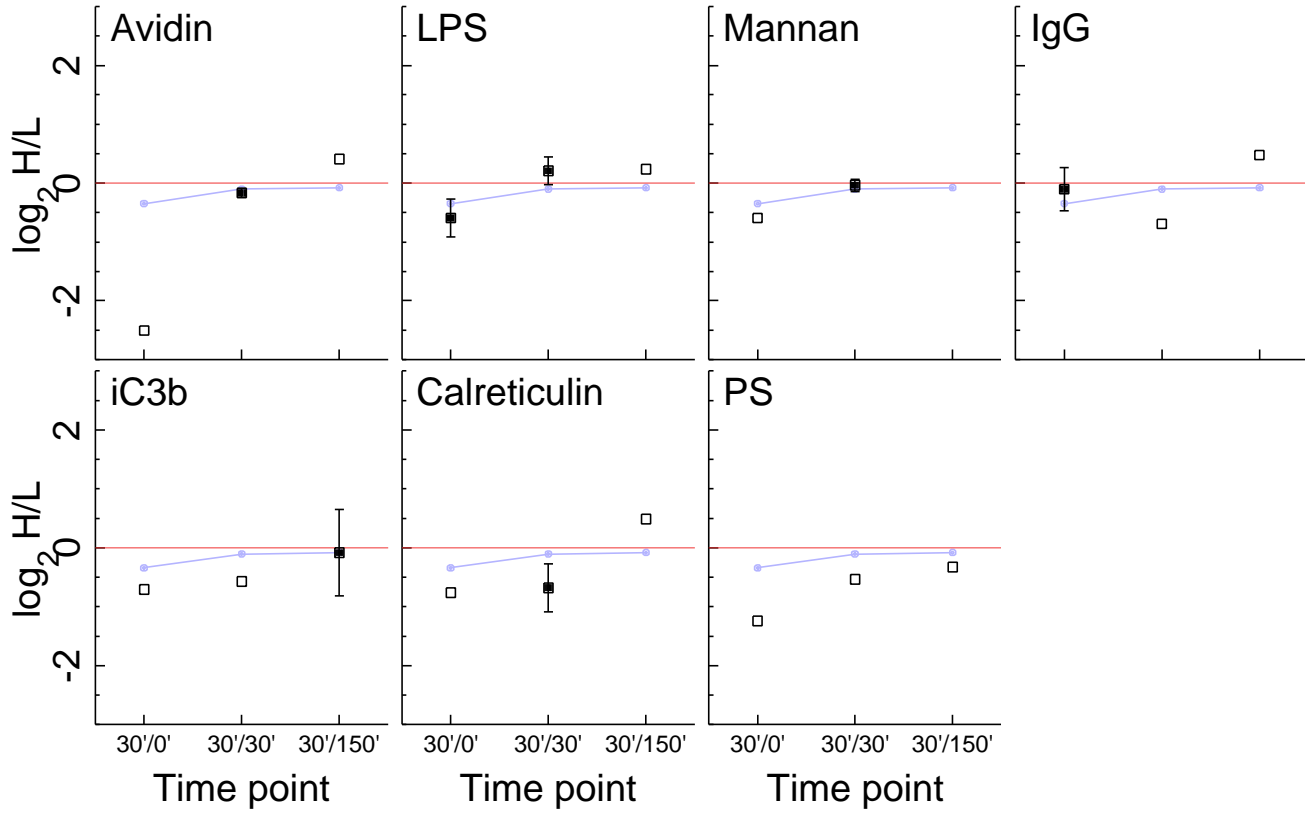

### c5ar1 (Q3TZ86)

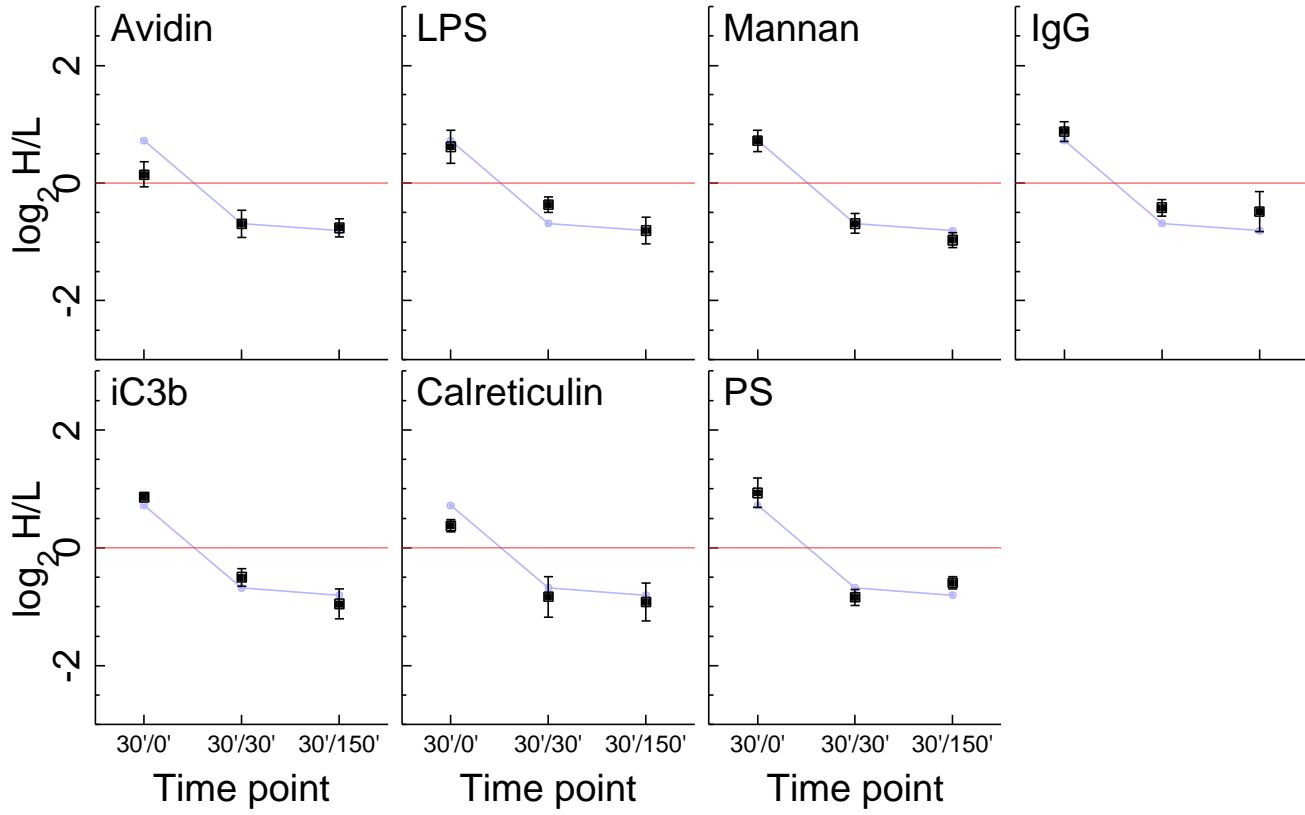

cab39 (Q06138)

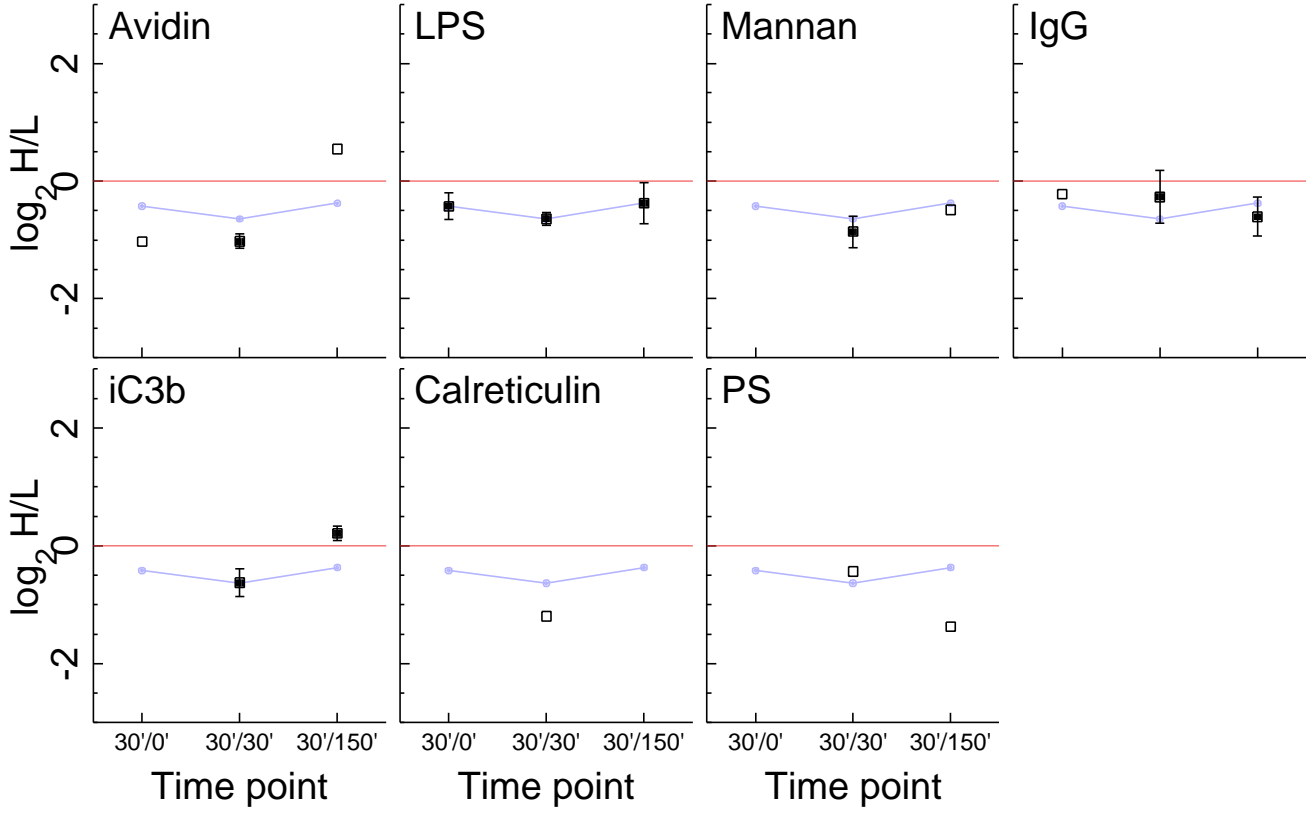

### cacybp (Q9CXW3)

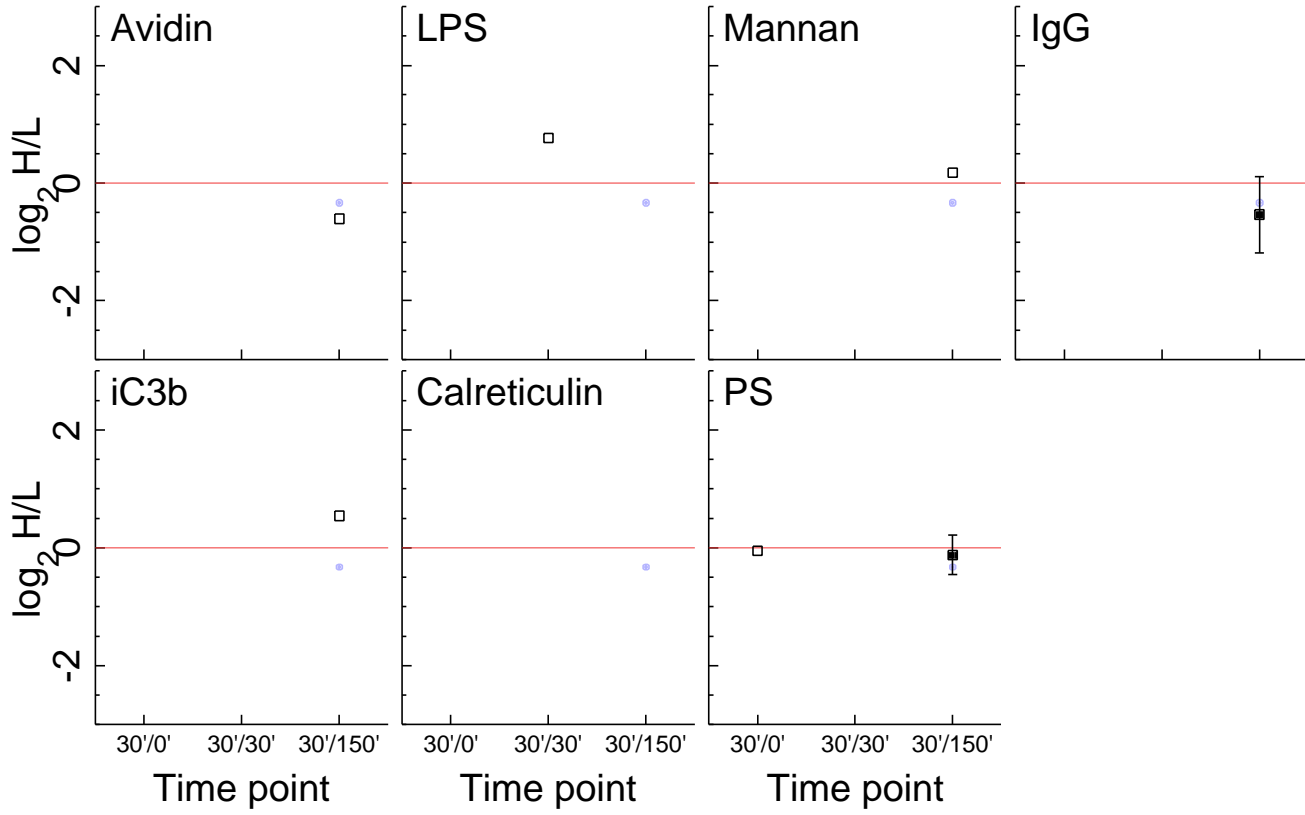



### cadm1 (E9PYN1)

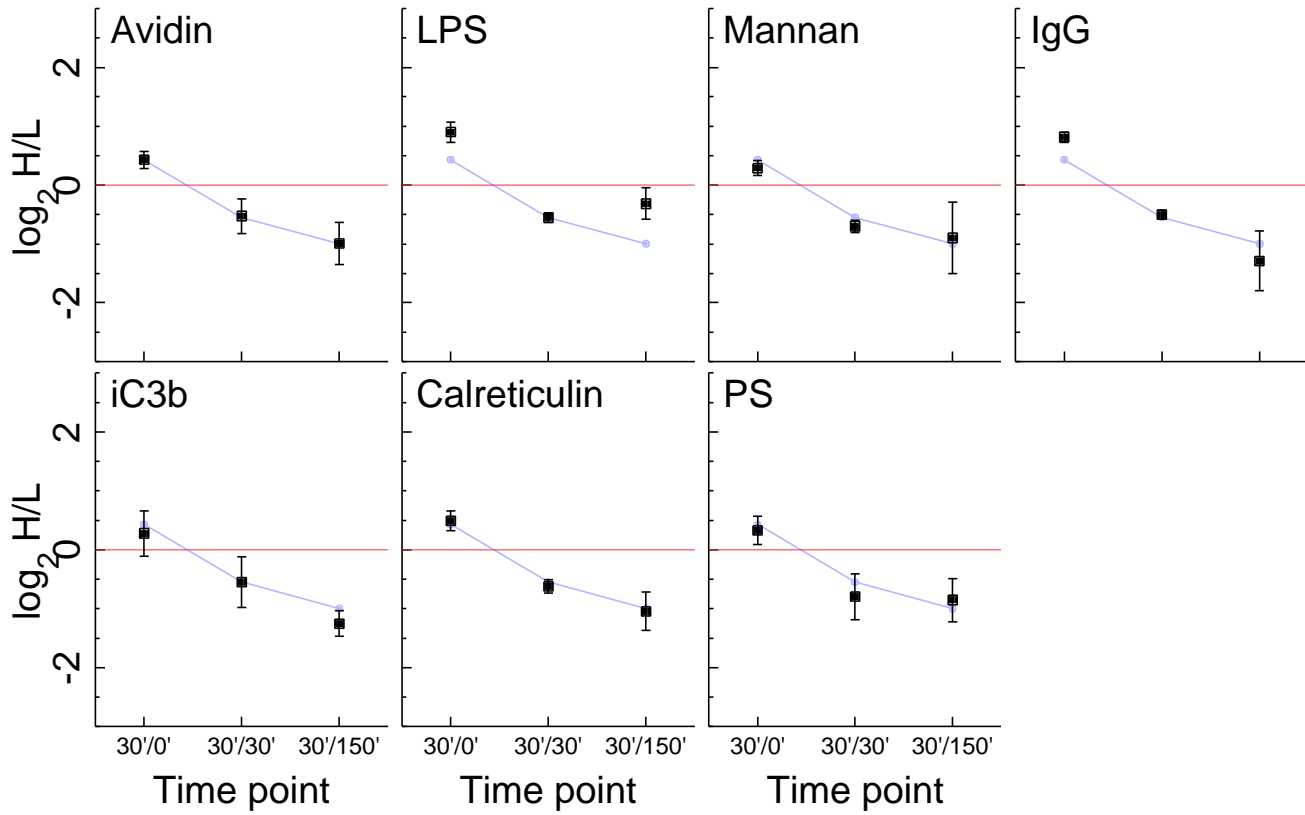

calm1 (Q3UKW2)

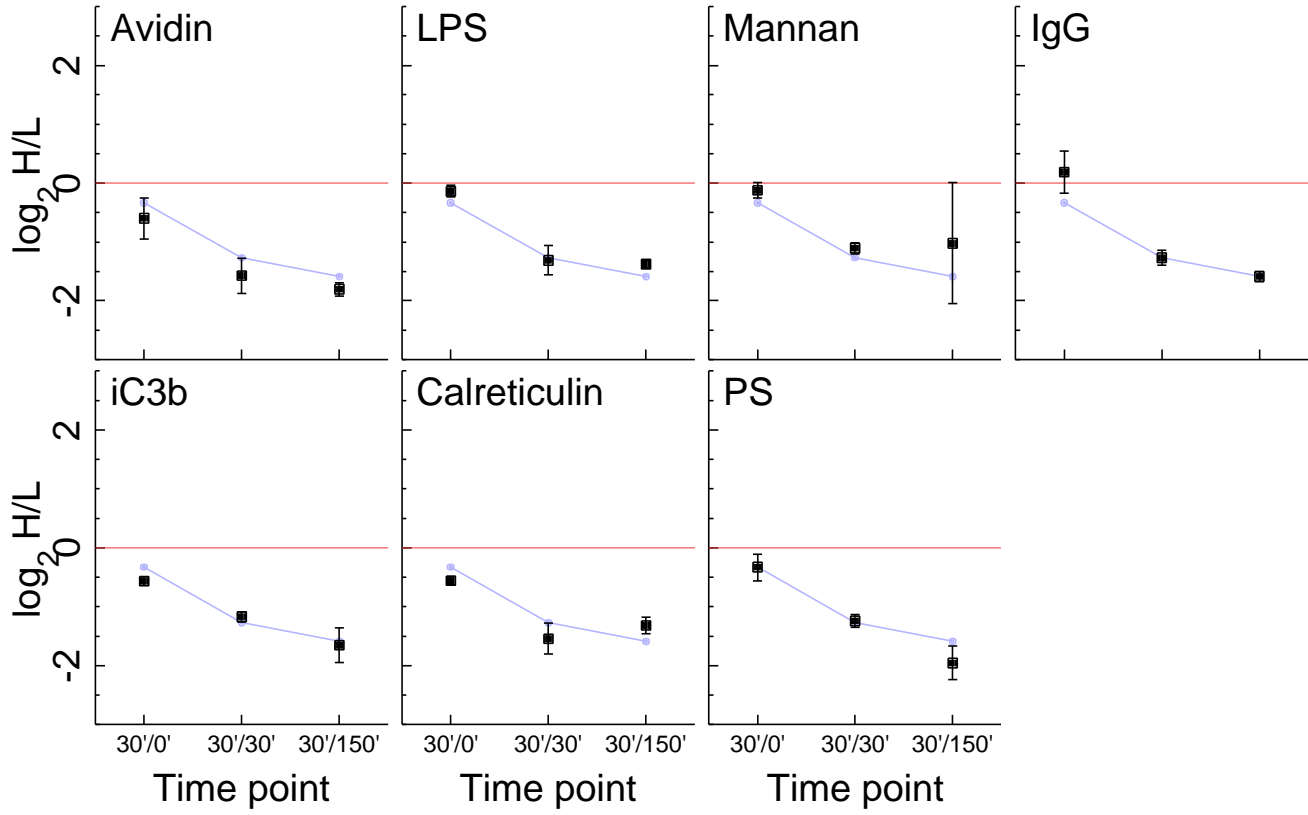

calr (P14211)

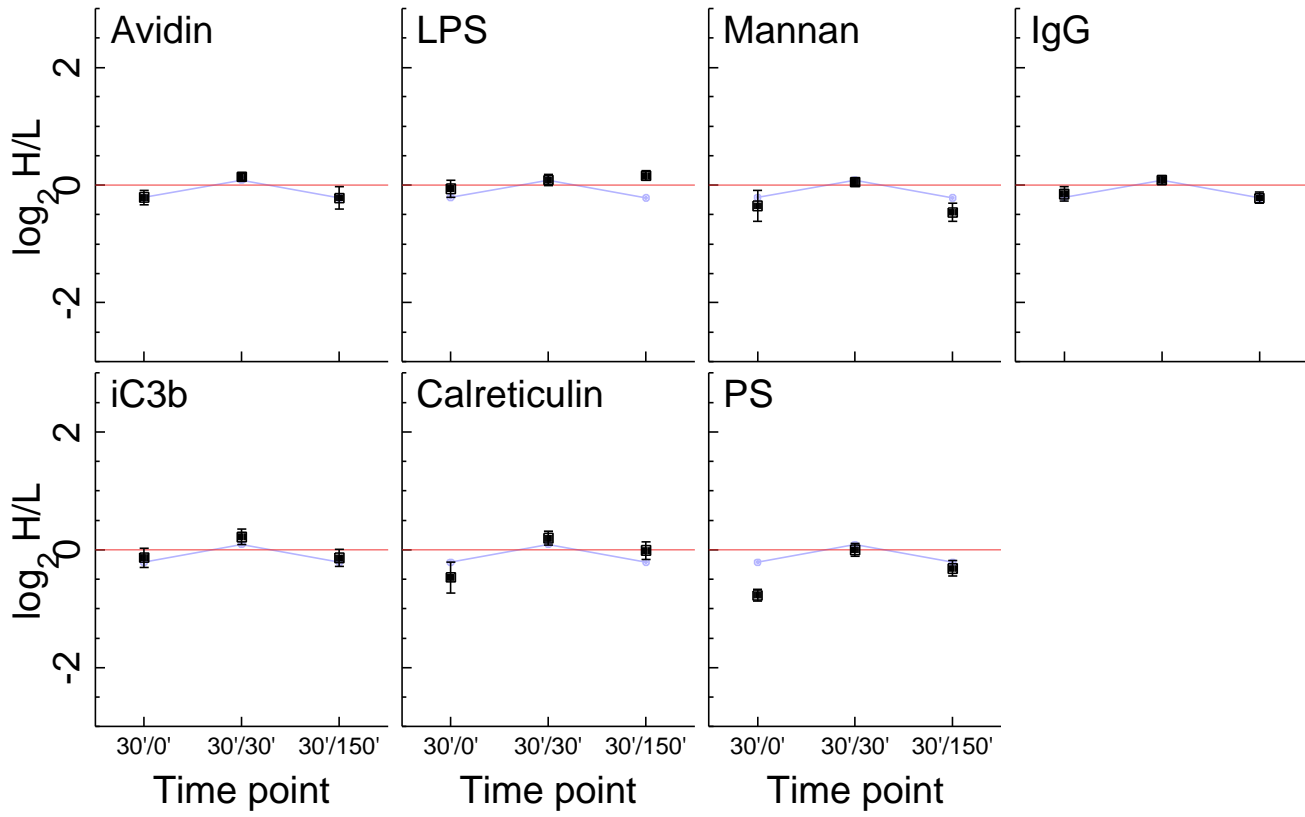

calu (O35887)

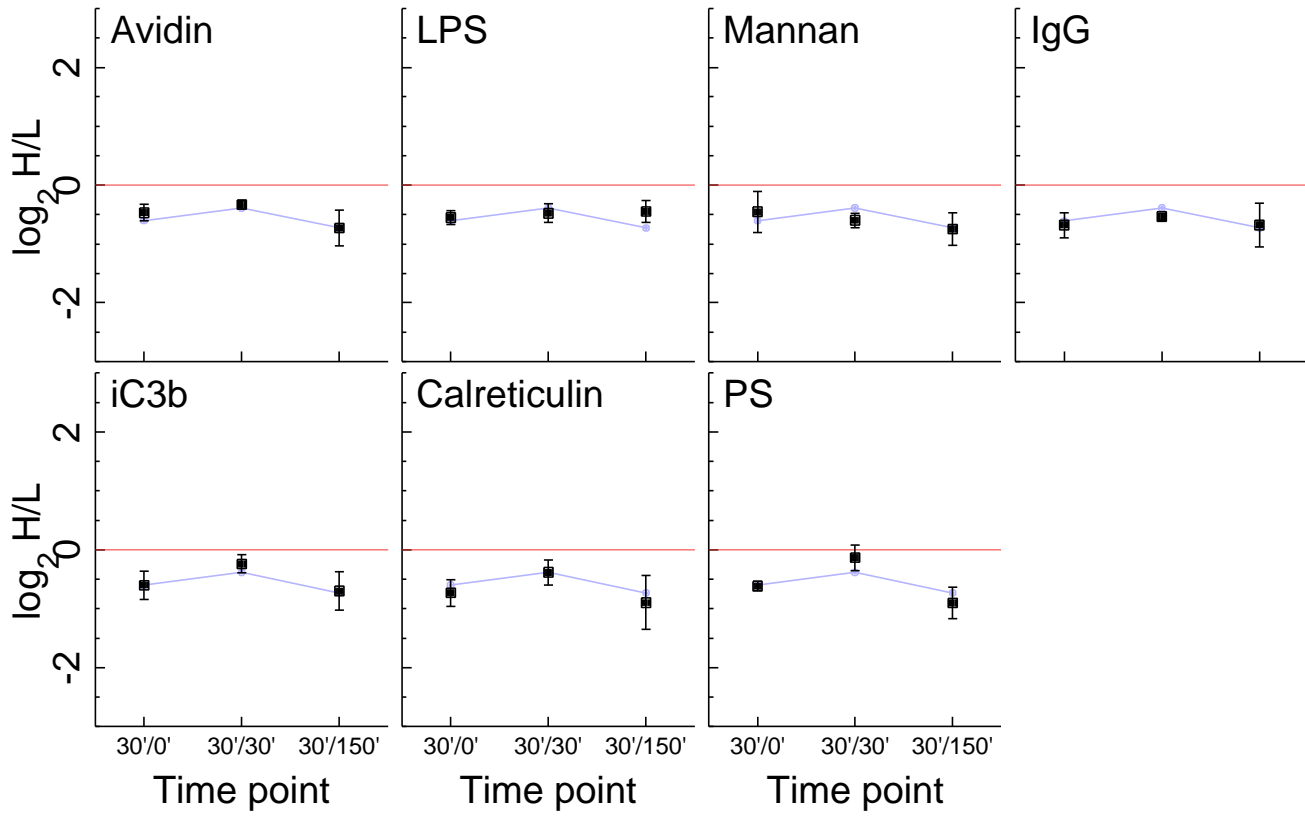

camk2d (E9Q1T1)

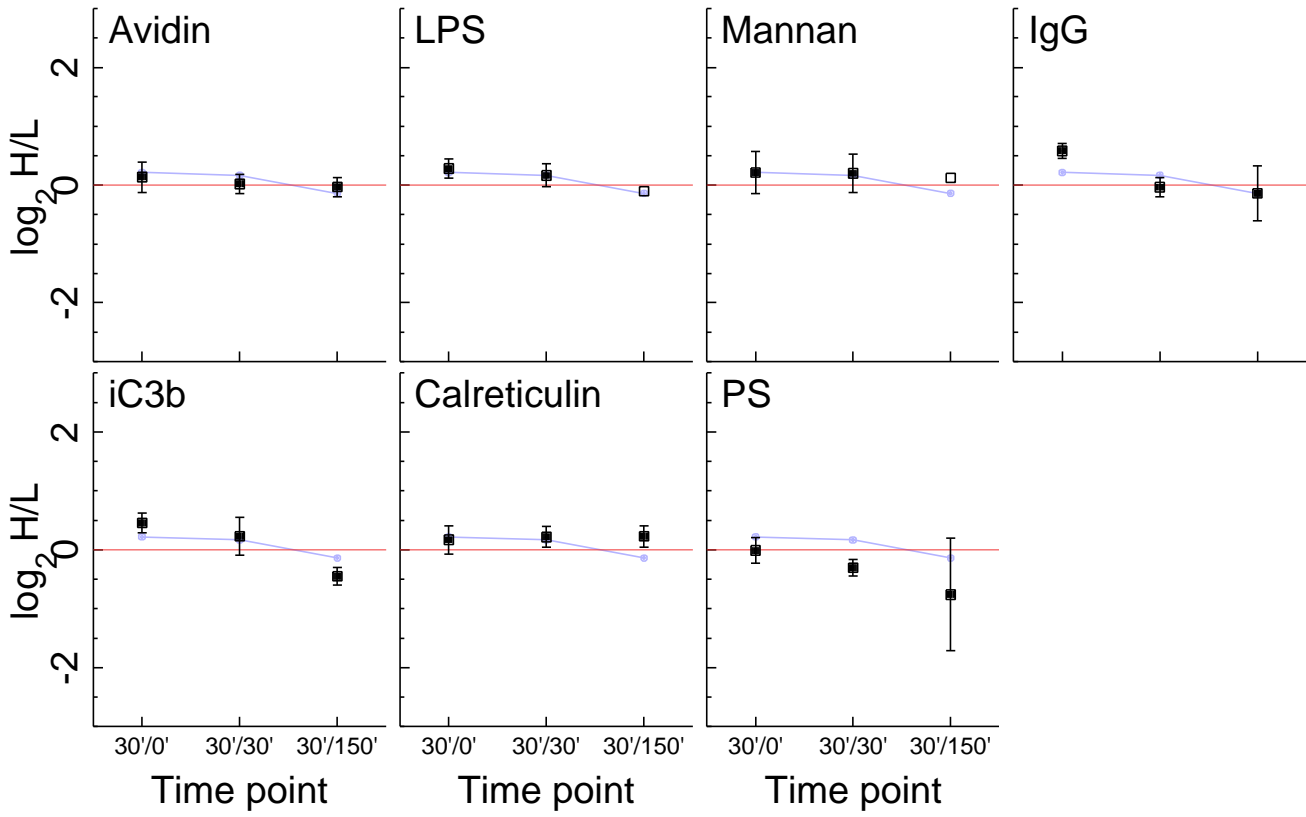

canx (P35564)

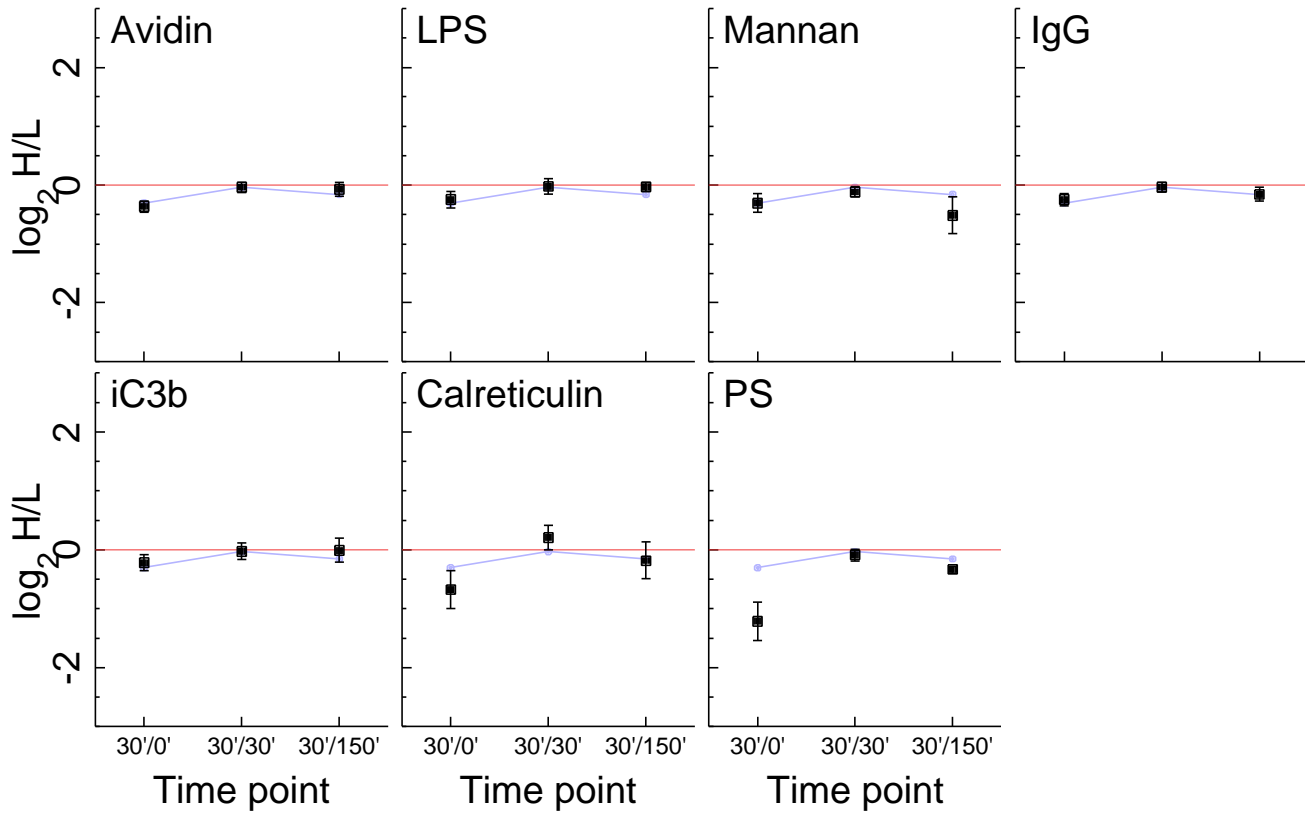

### cap1 (P40124)

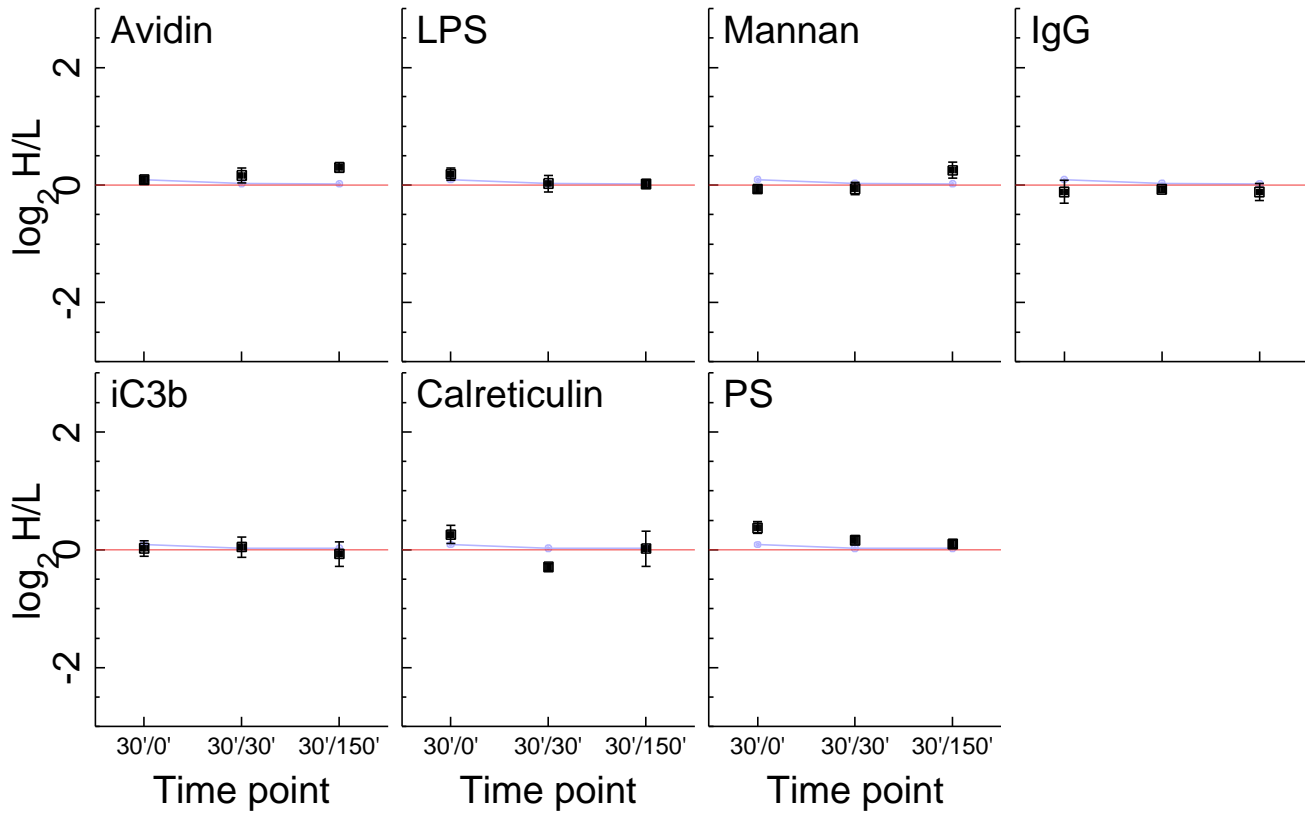

capg (Q99LB4)

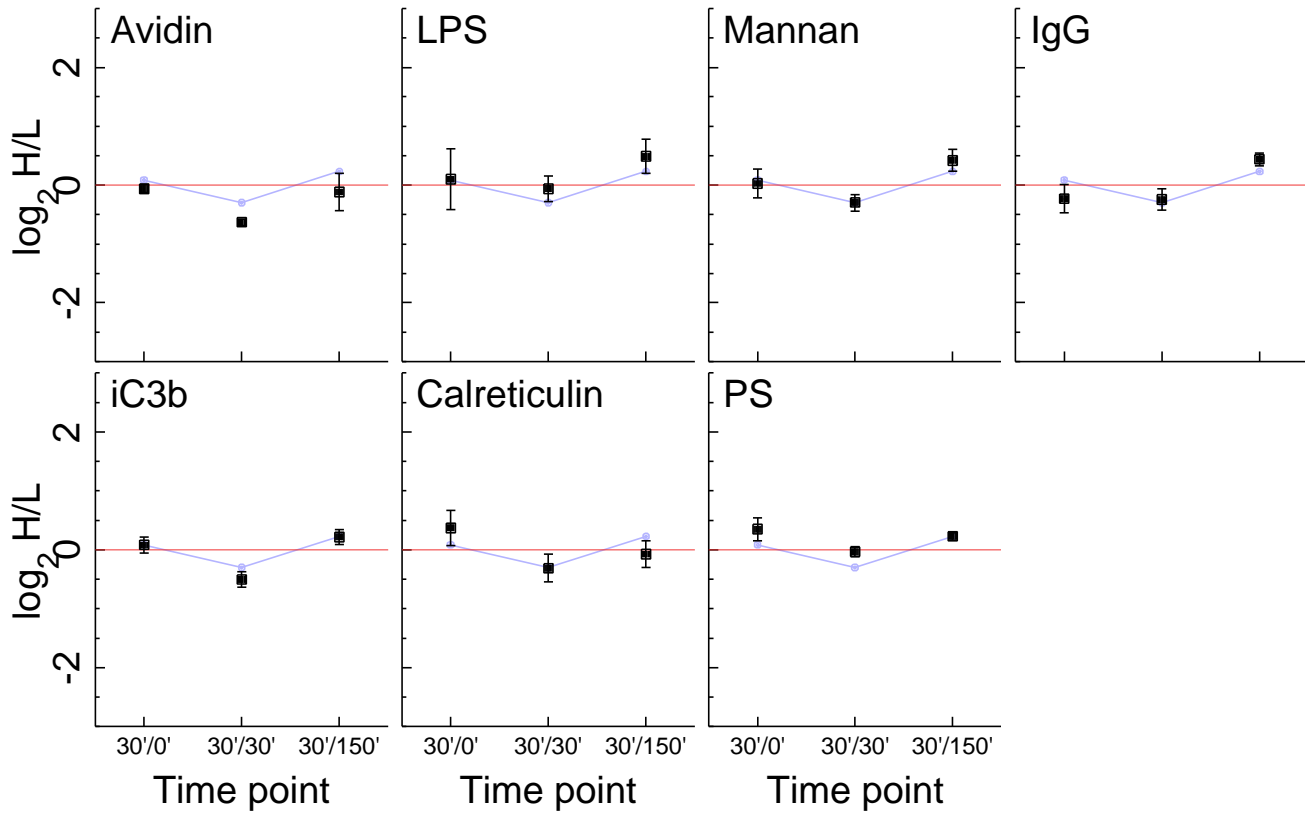



capn1 (O35350)

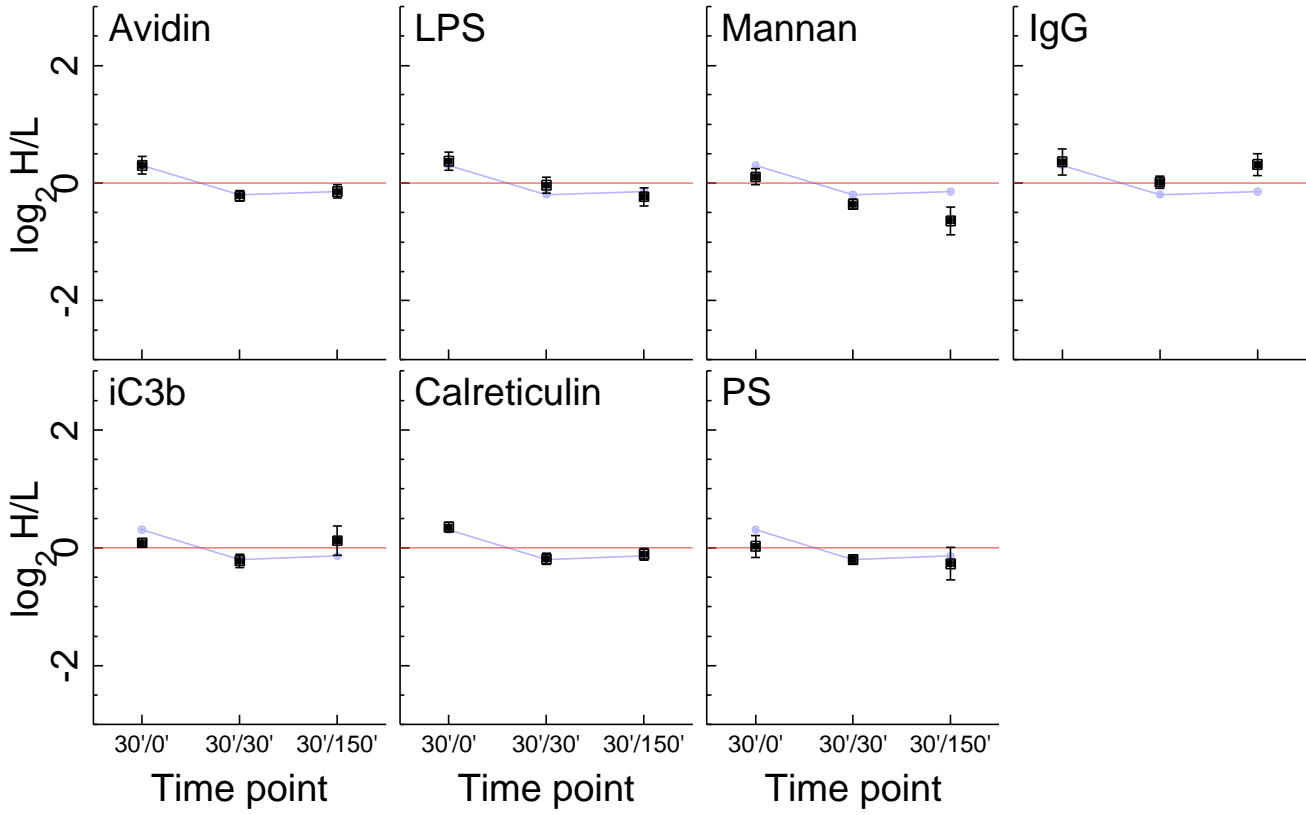

capn2 (O08529)

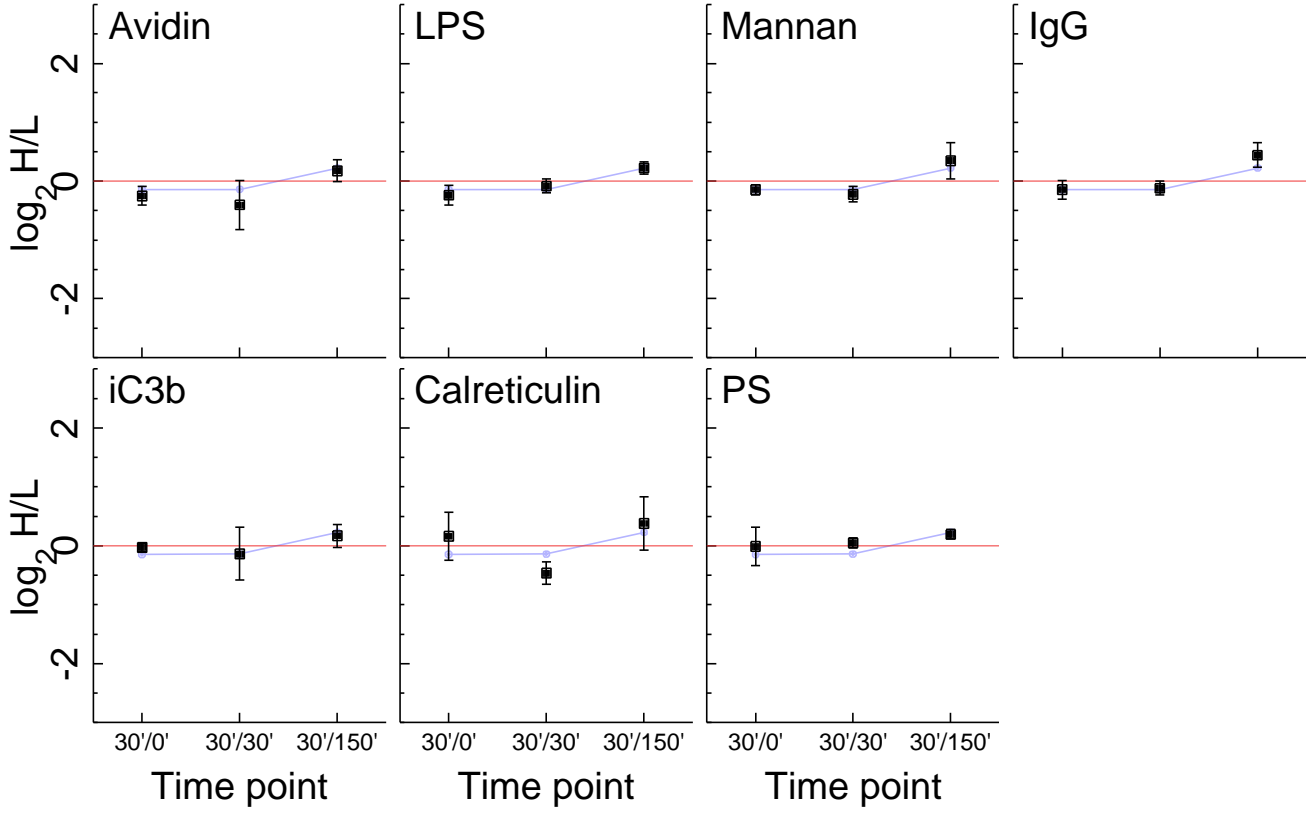

capn5 (O08688)

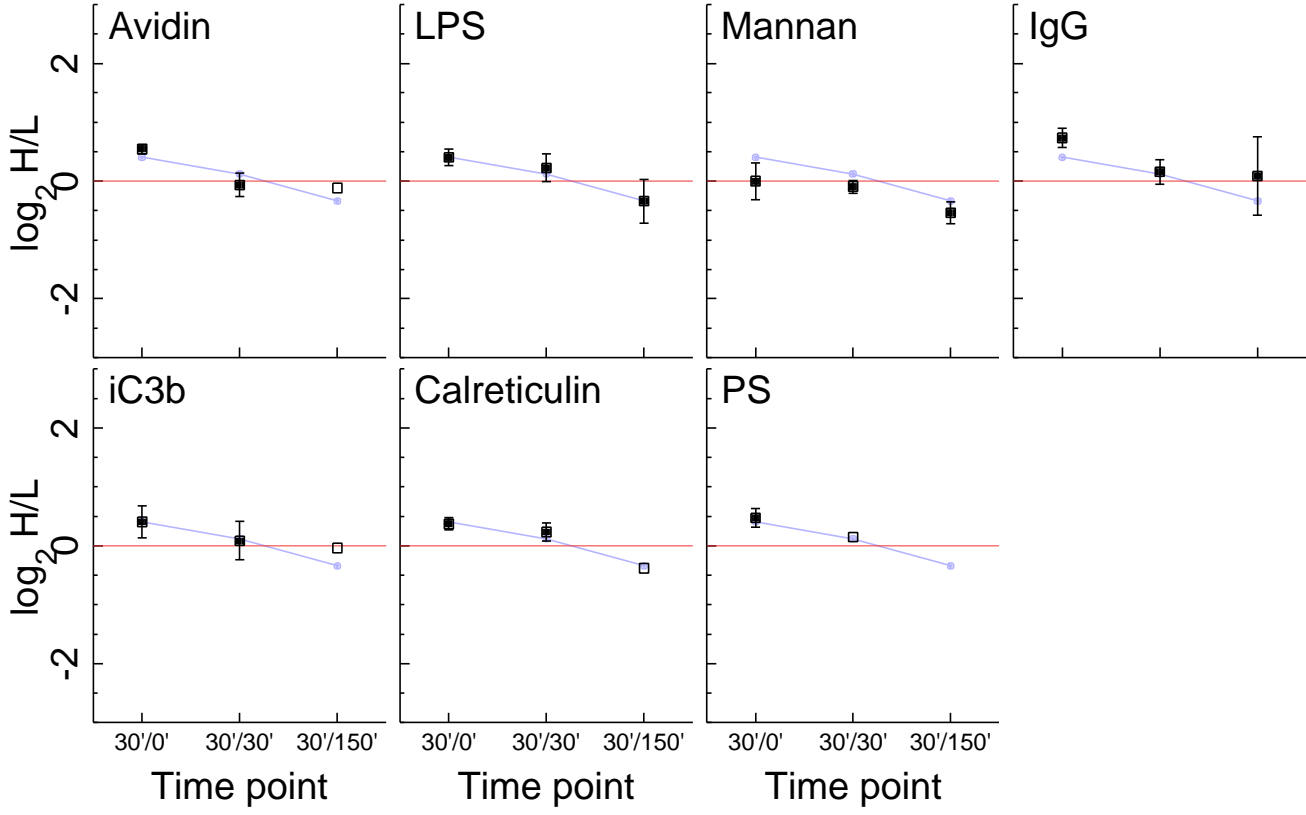

### capns1 (D3YW48)

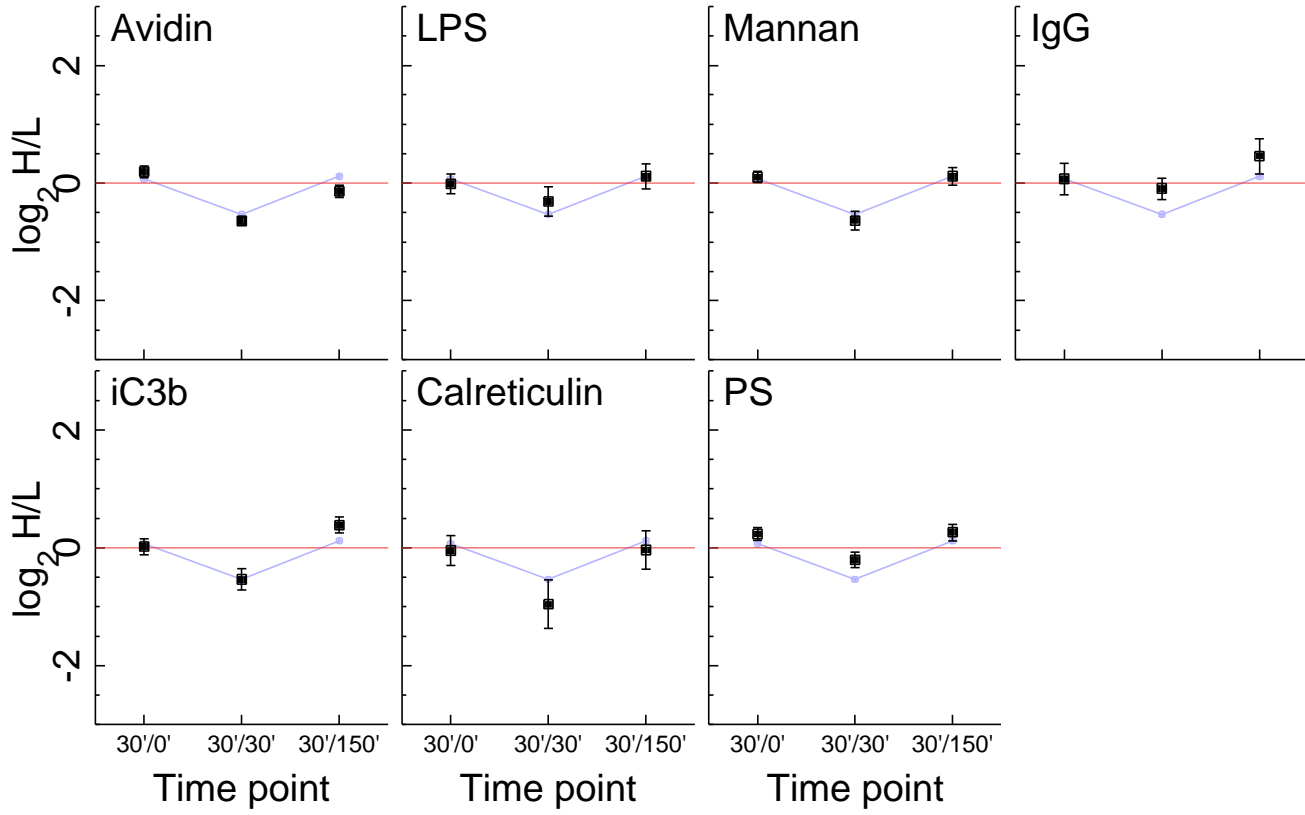

### caprin1 (Q60865)

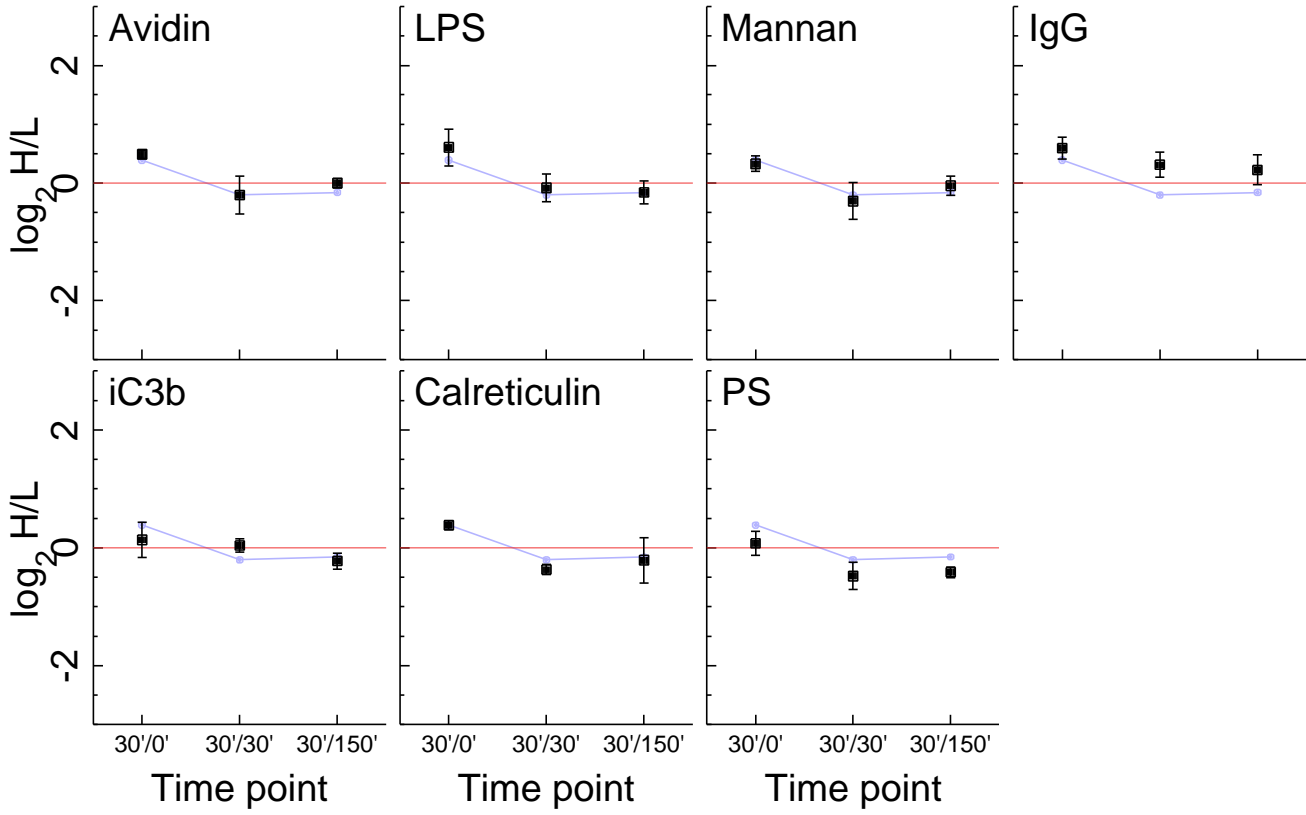

### capza1 (Q5RKN9)

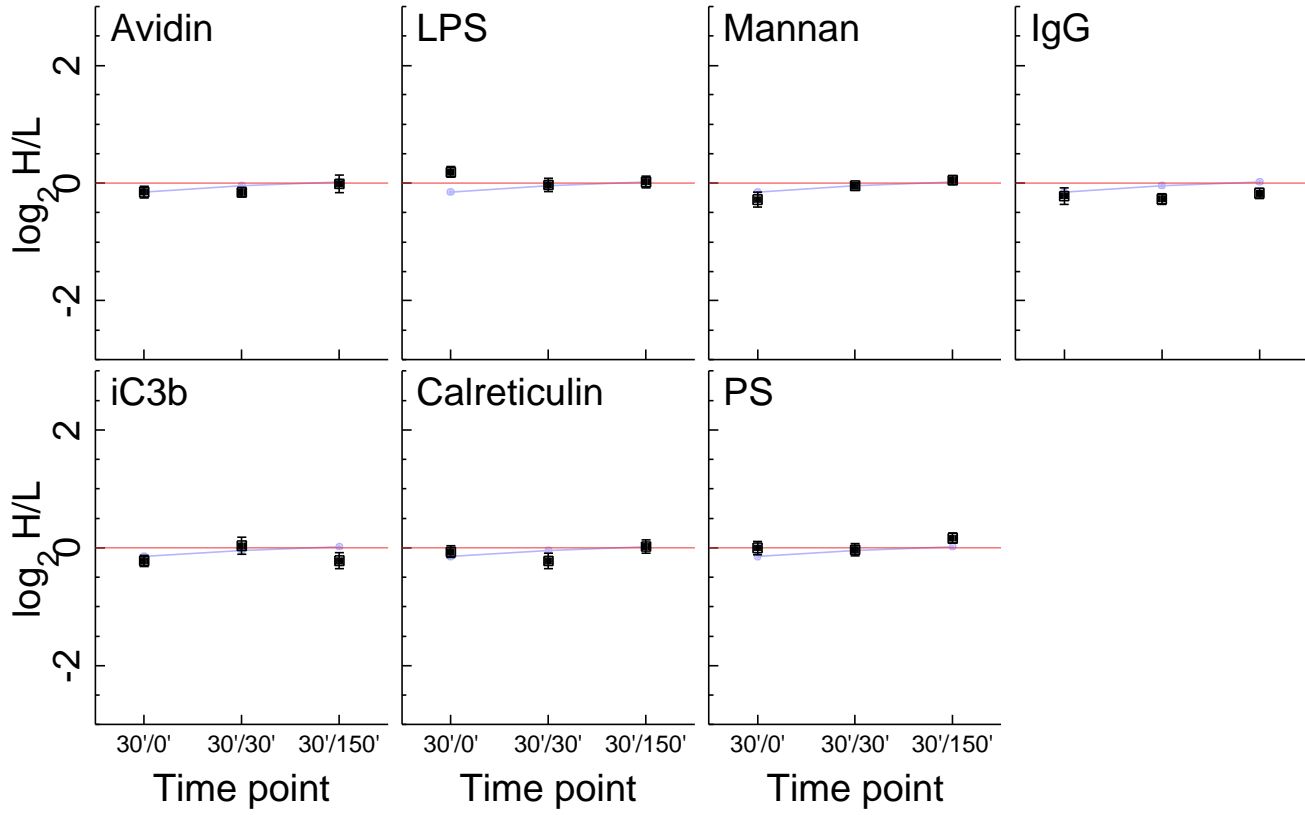

capza2 (P47754)

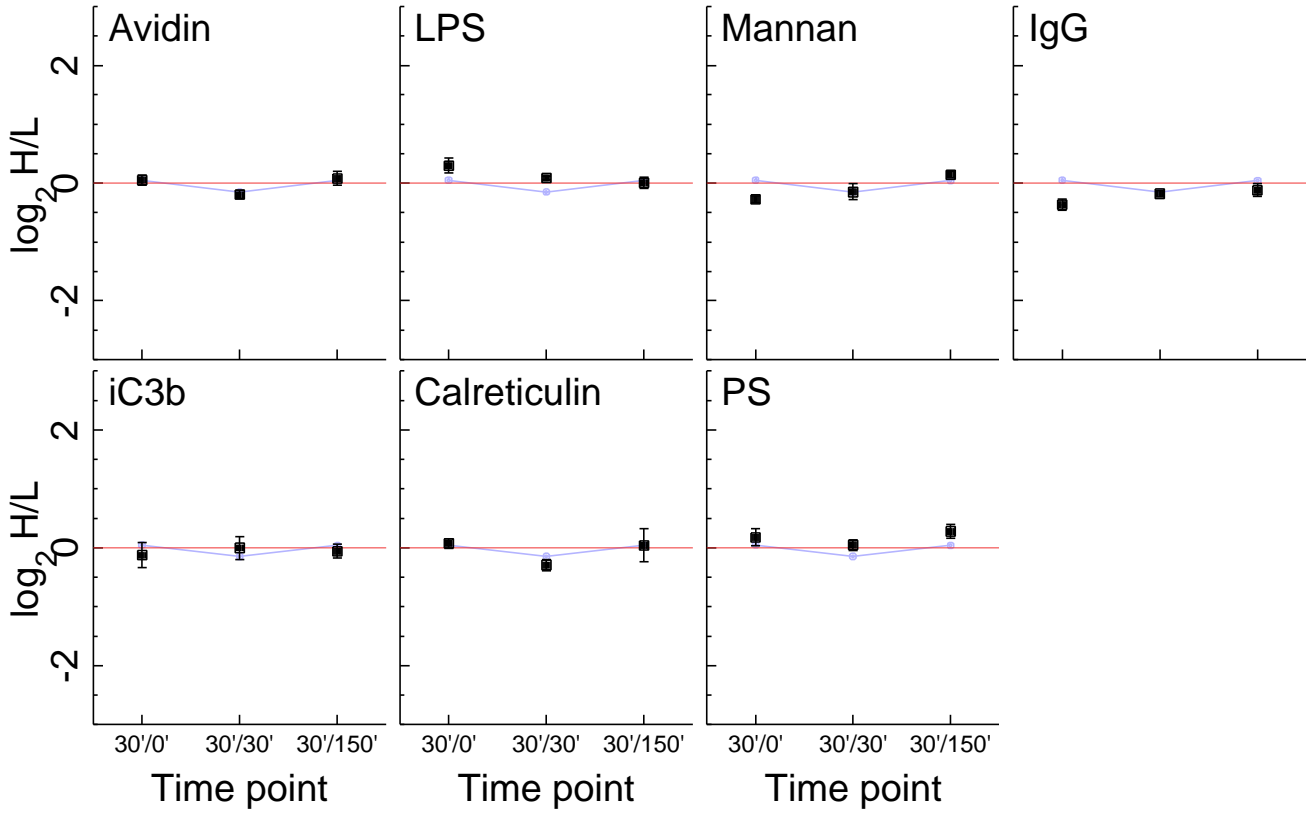

capzb (A2AMV7)

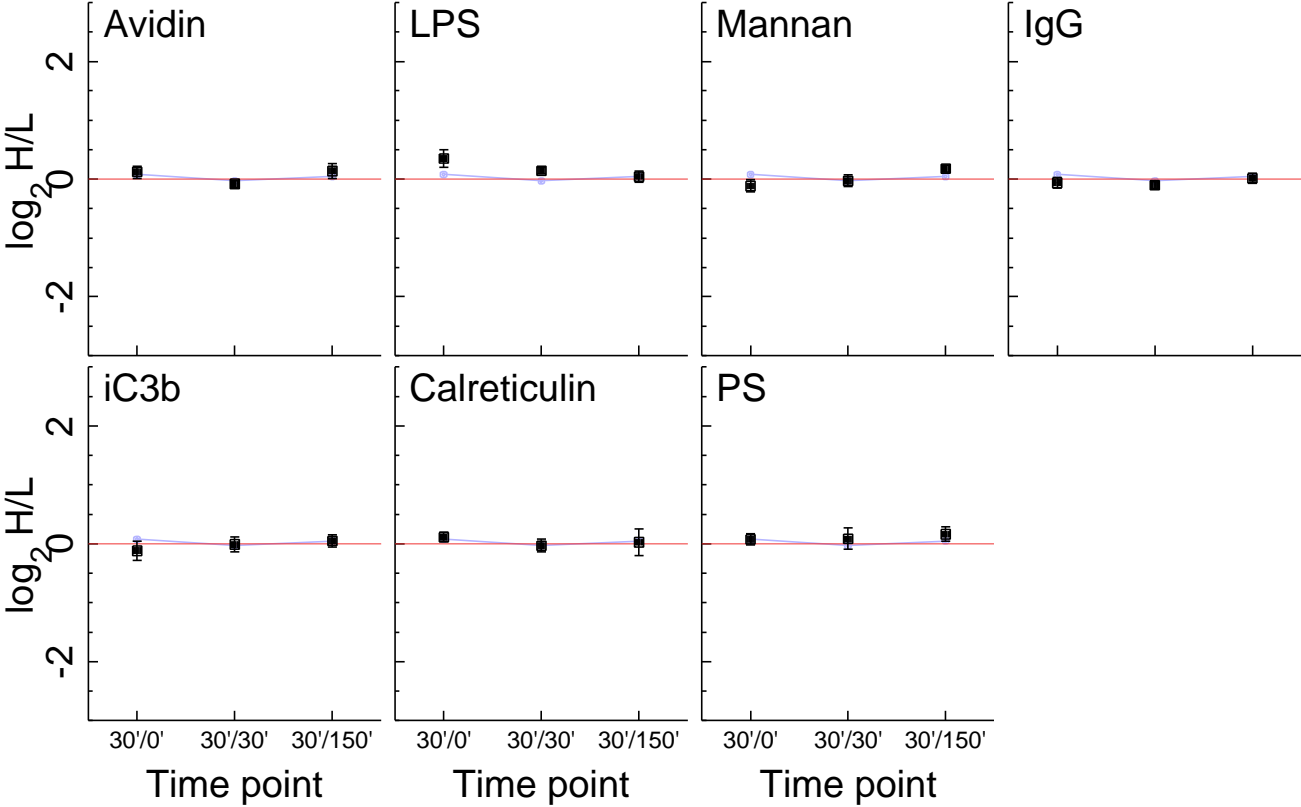



cast (P51125)

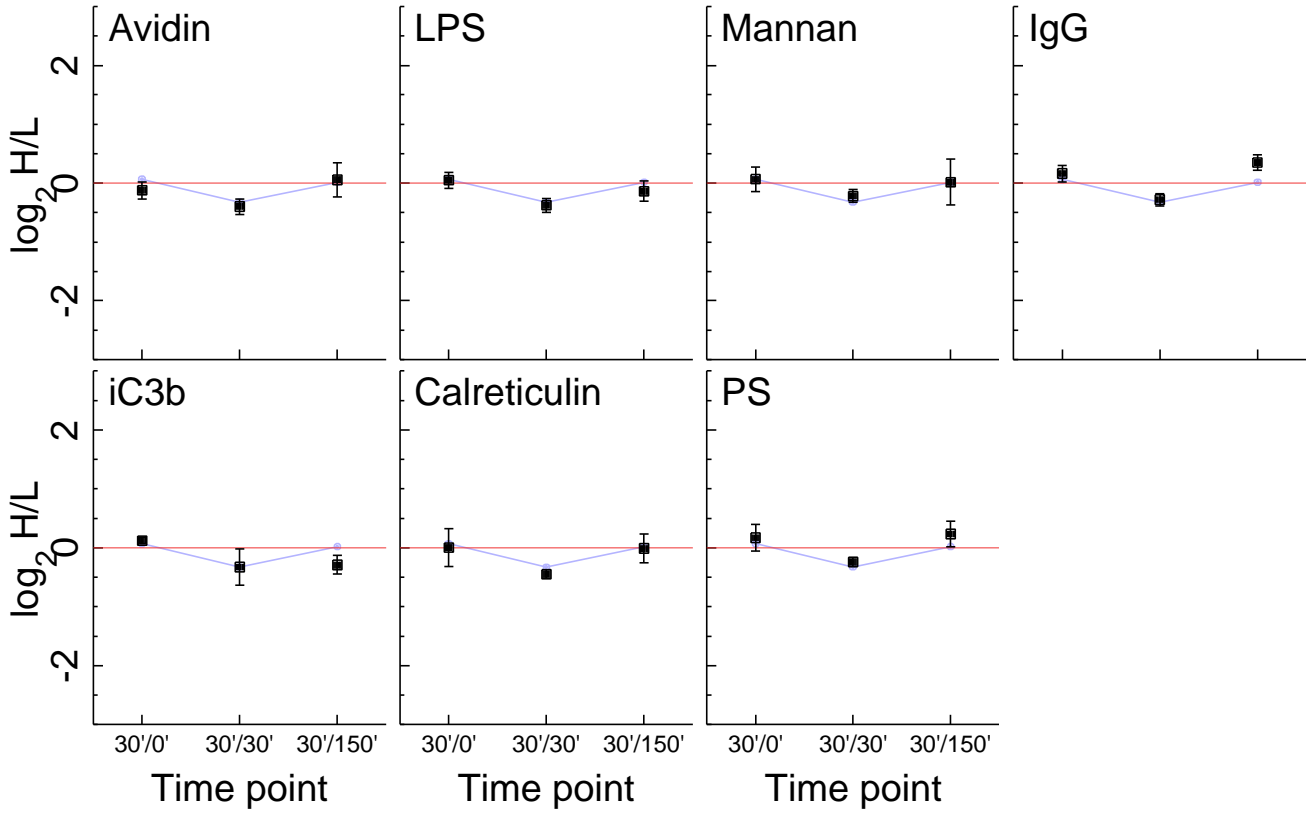

cat (P24270)

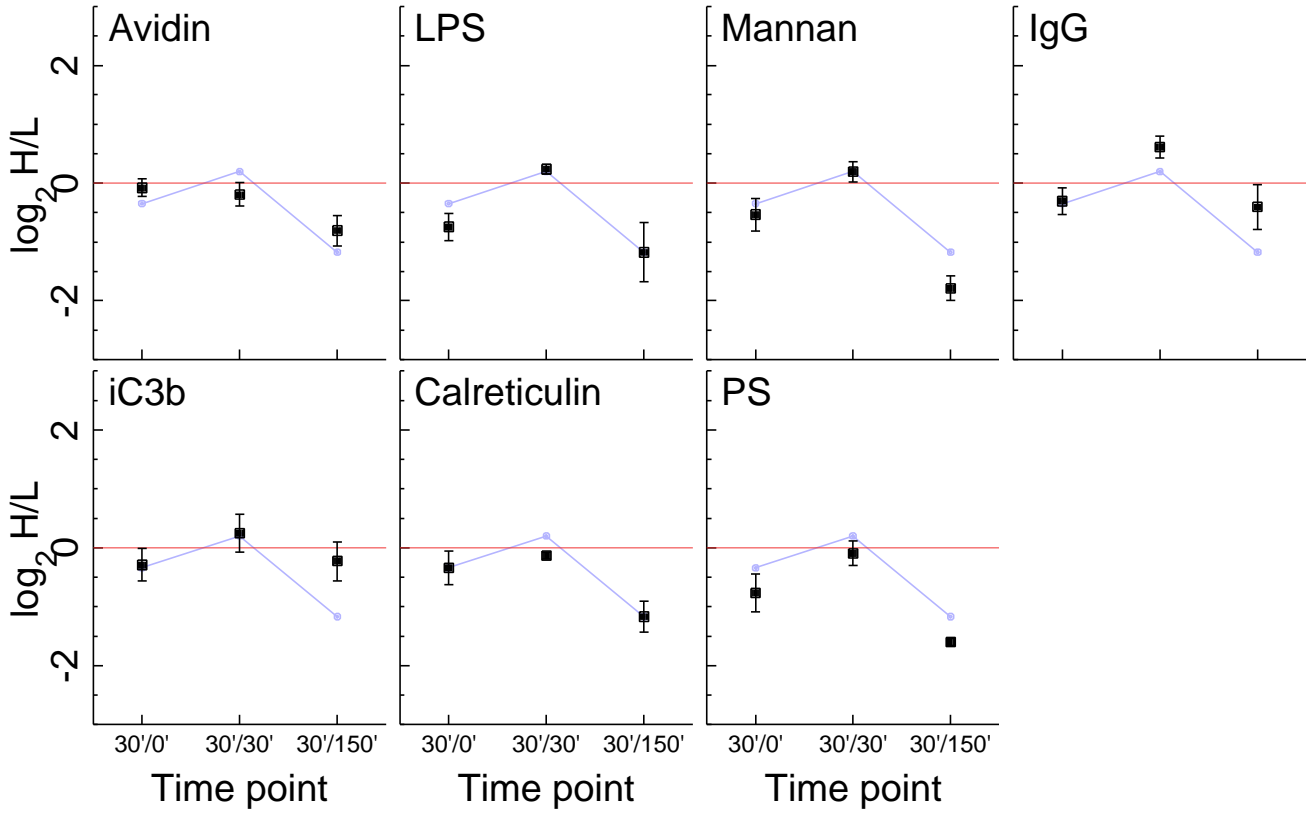

cbl (P22682)

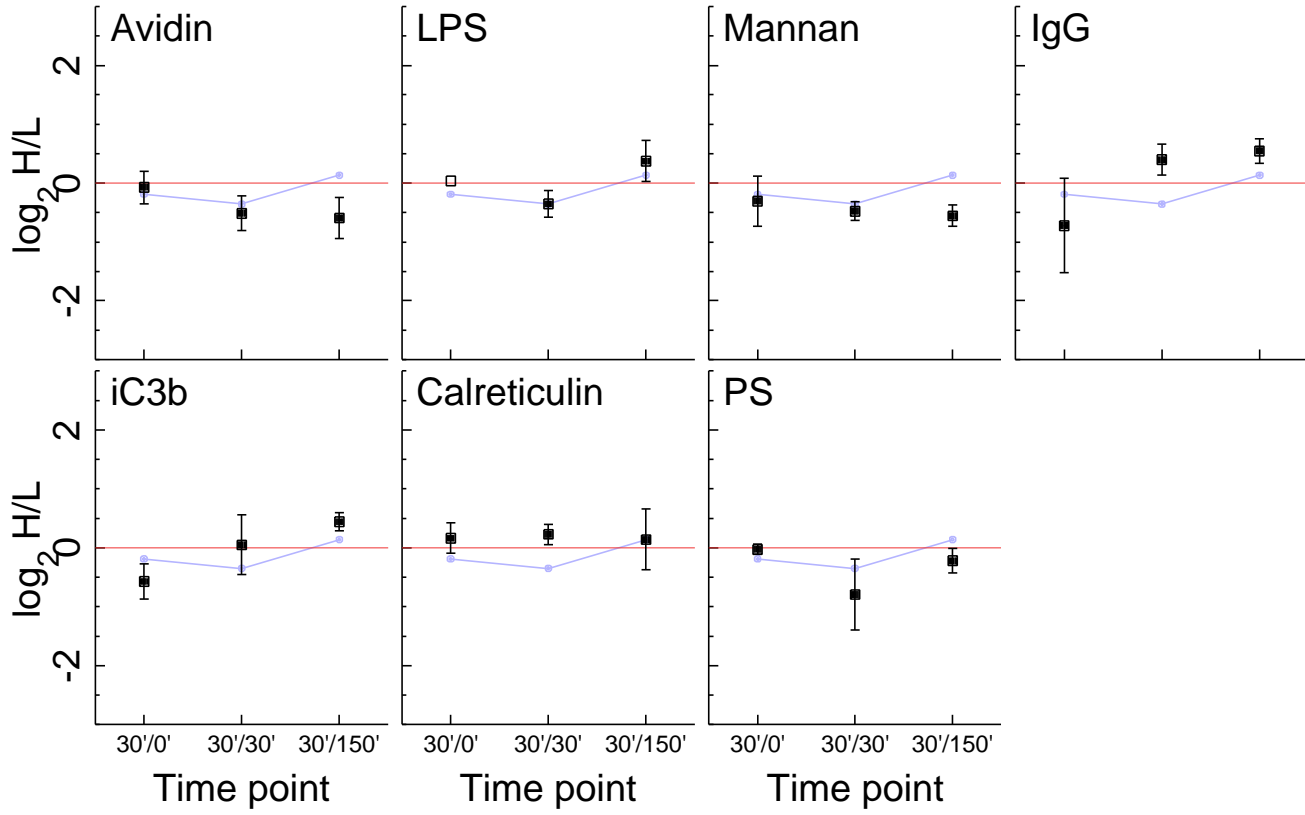

cbr2 (P08074)

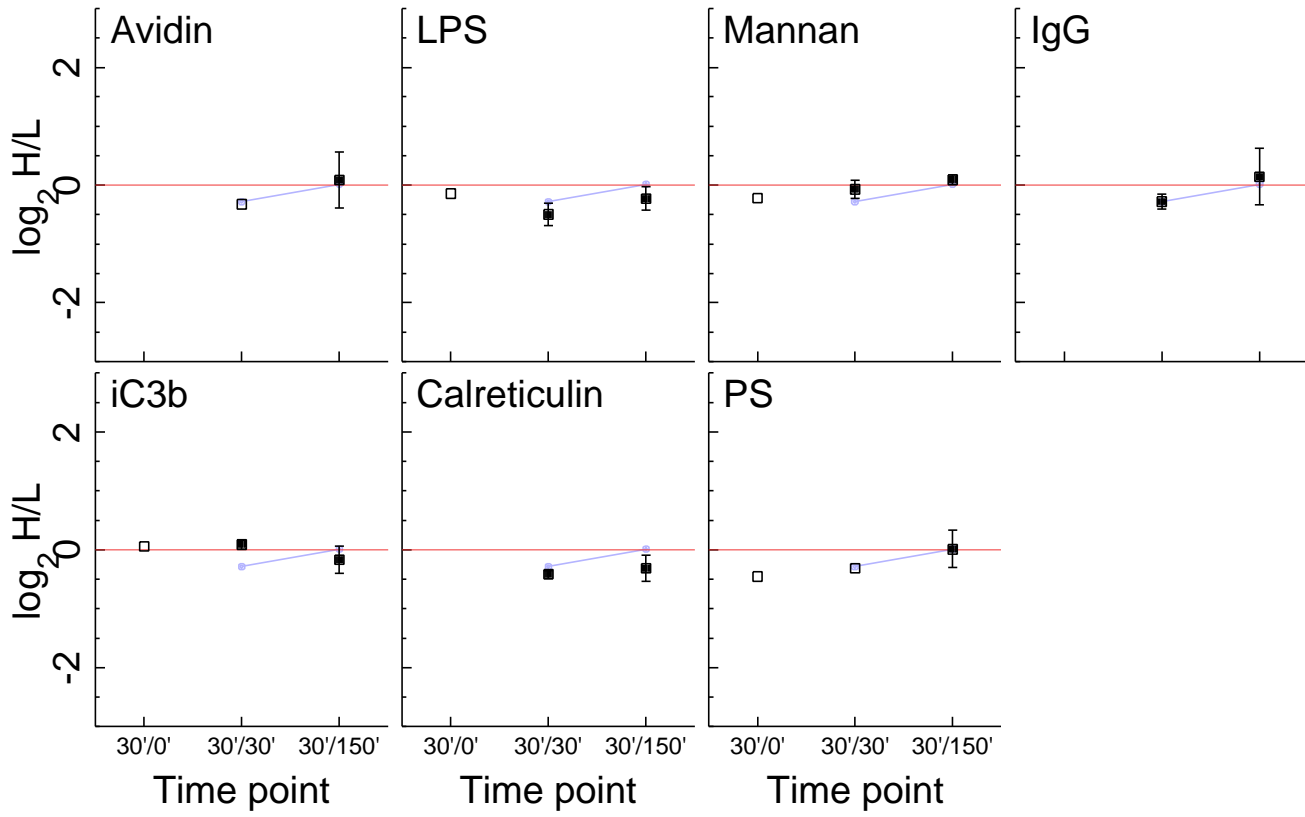

### cbx3 (P23198)

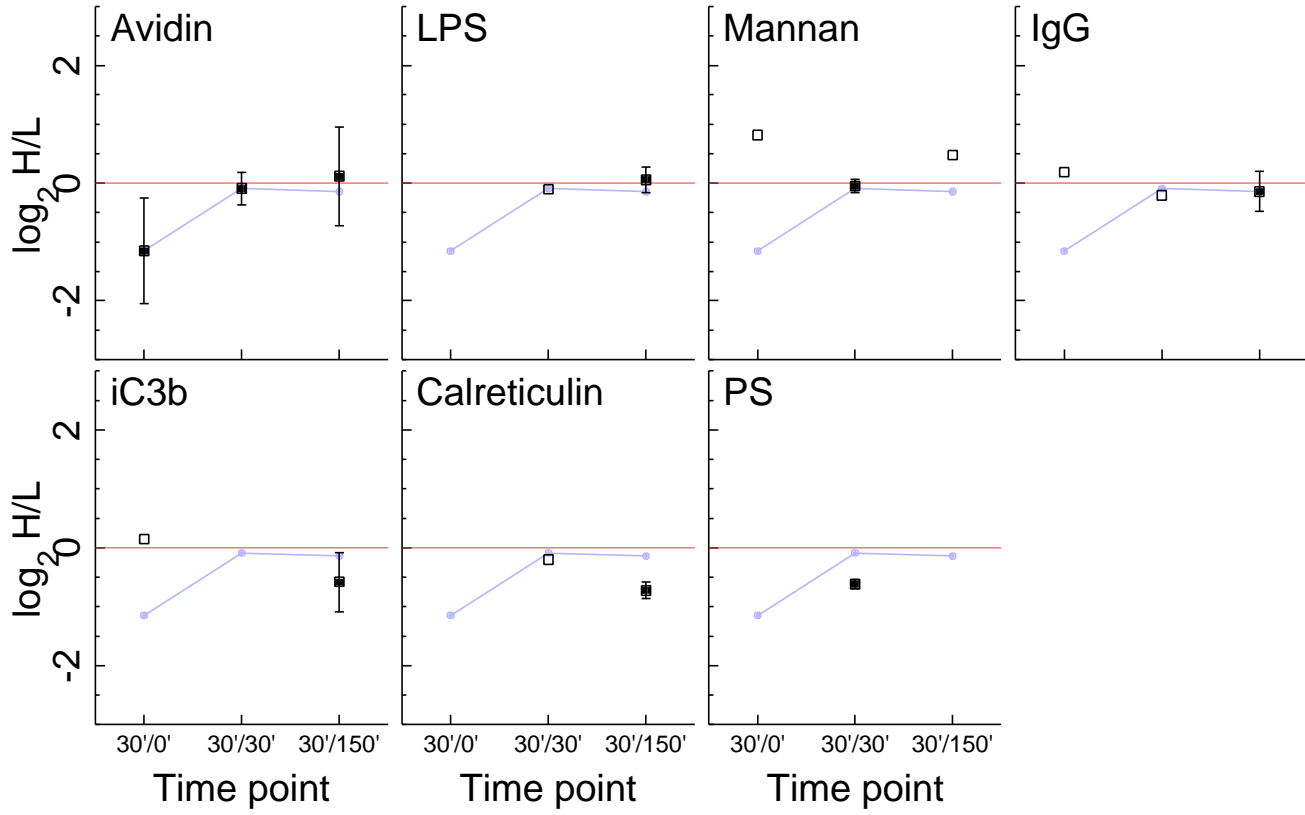

cc2d1b (Q8BRN9)

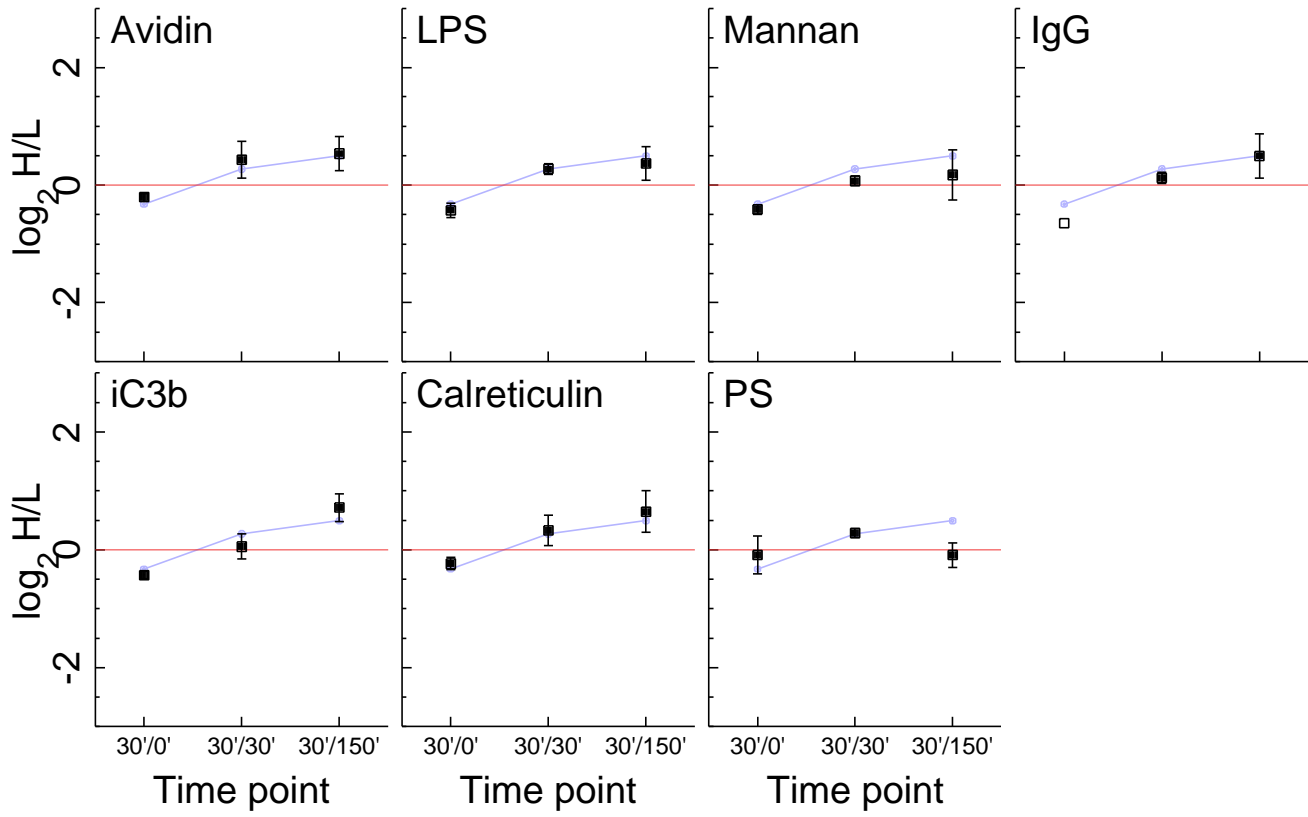

ccdc115 (Q8VE99)

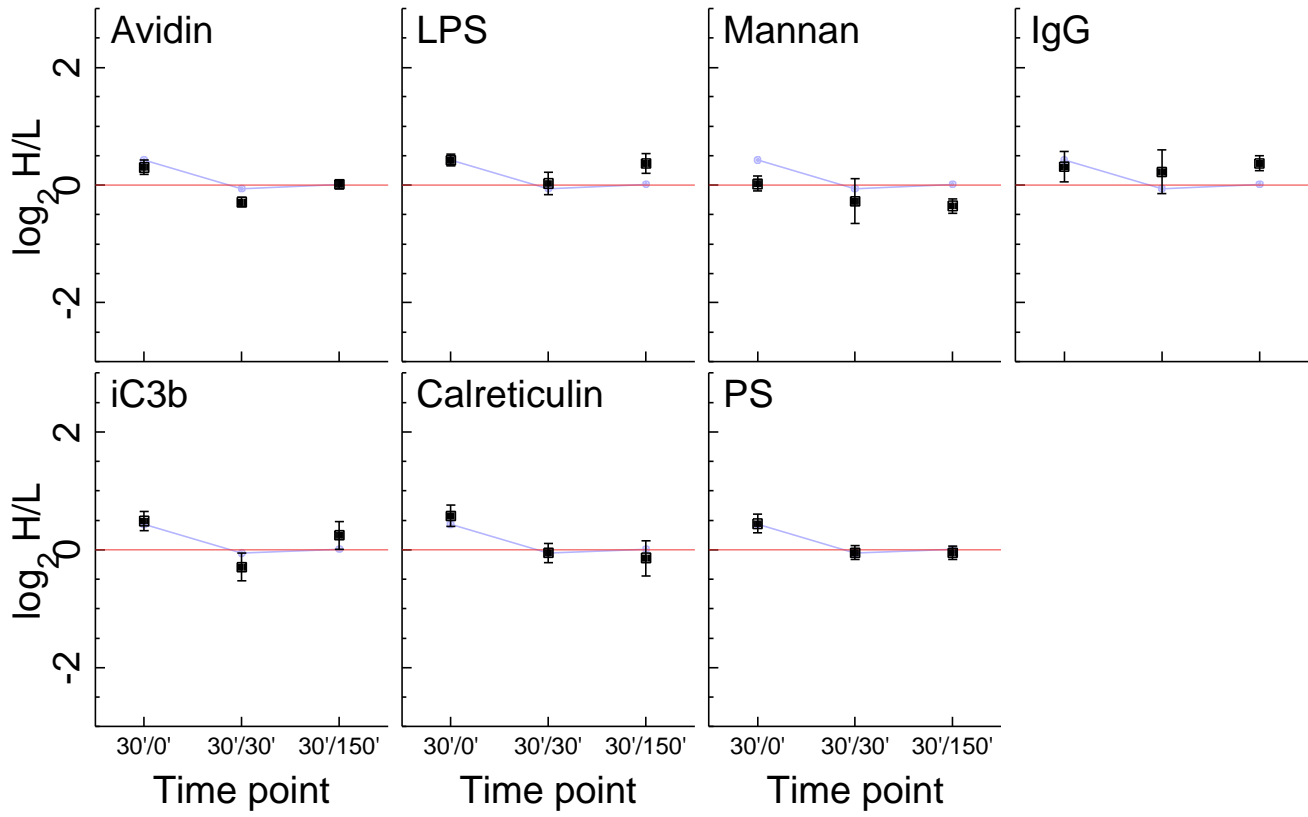

### ccdc12 (Q8R344)

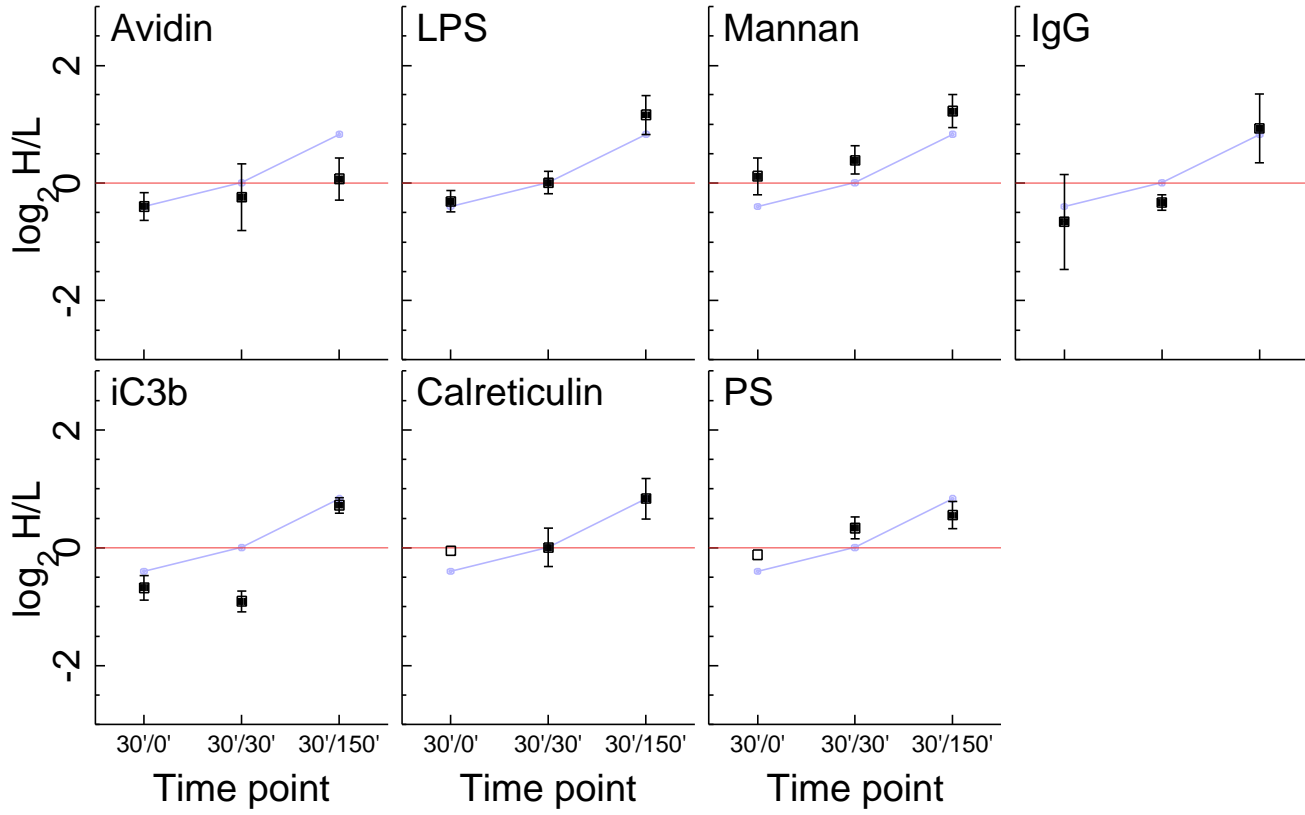



ccdc22 (Q9JIG7)

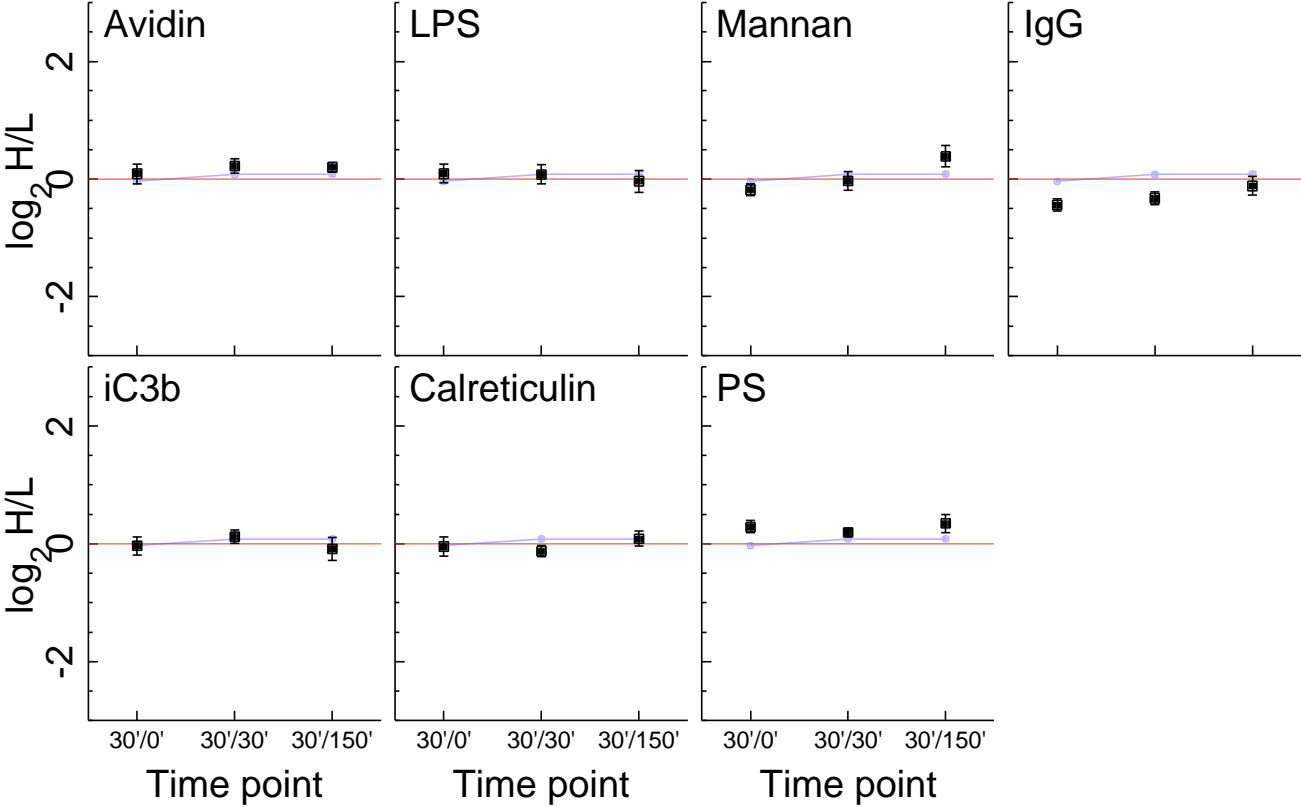

### ccdc50 (Q810U5)

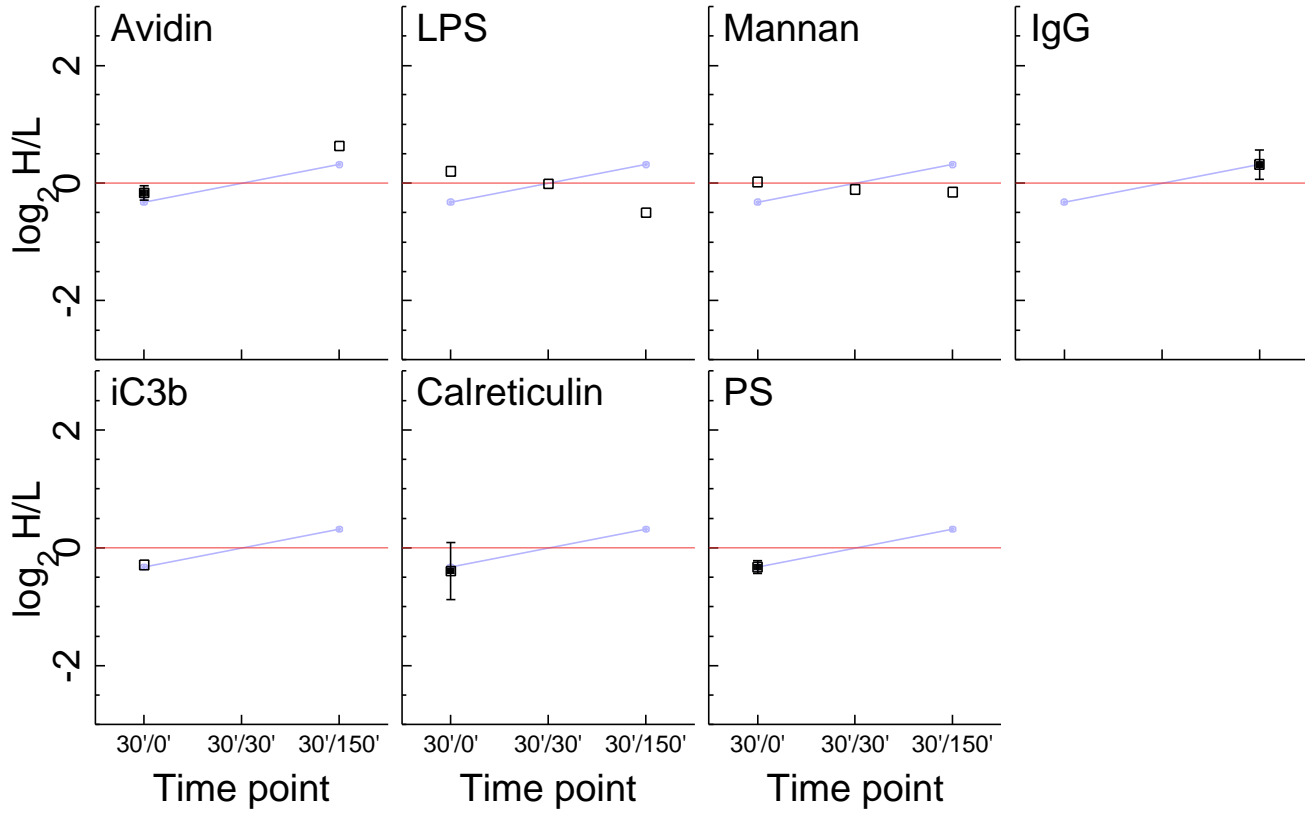

### ccdc53 (Q9CR27)

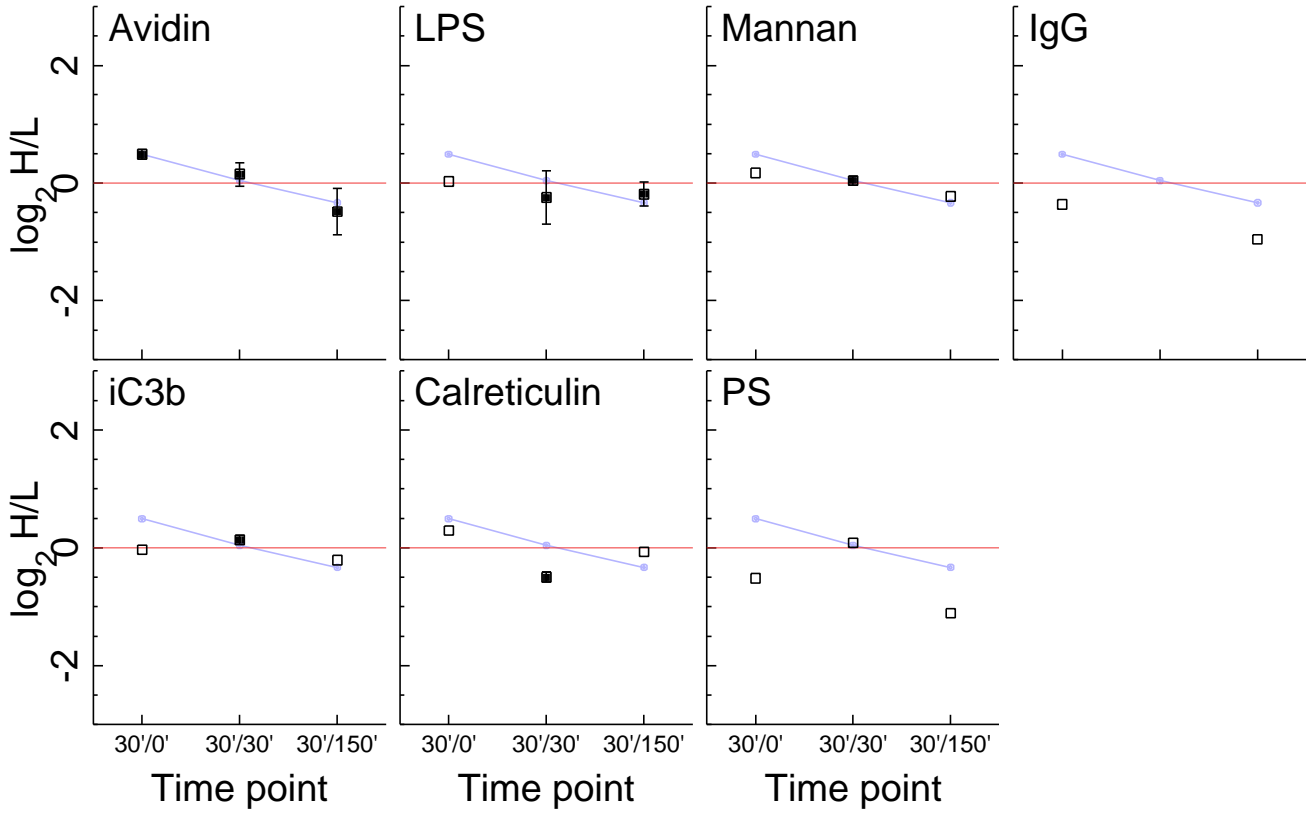

ccdc75 (Q3UFS4)

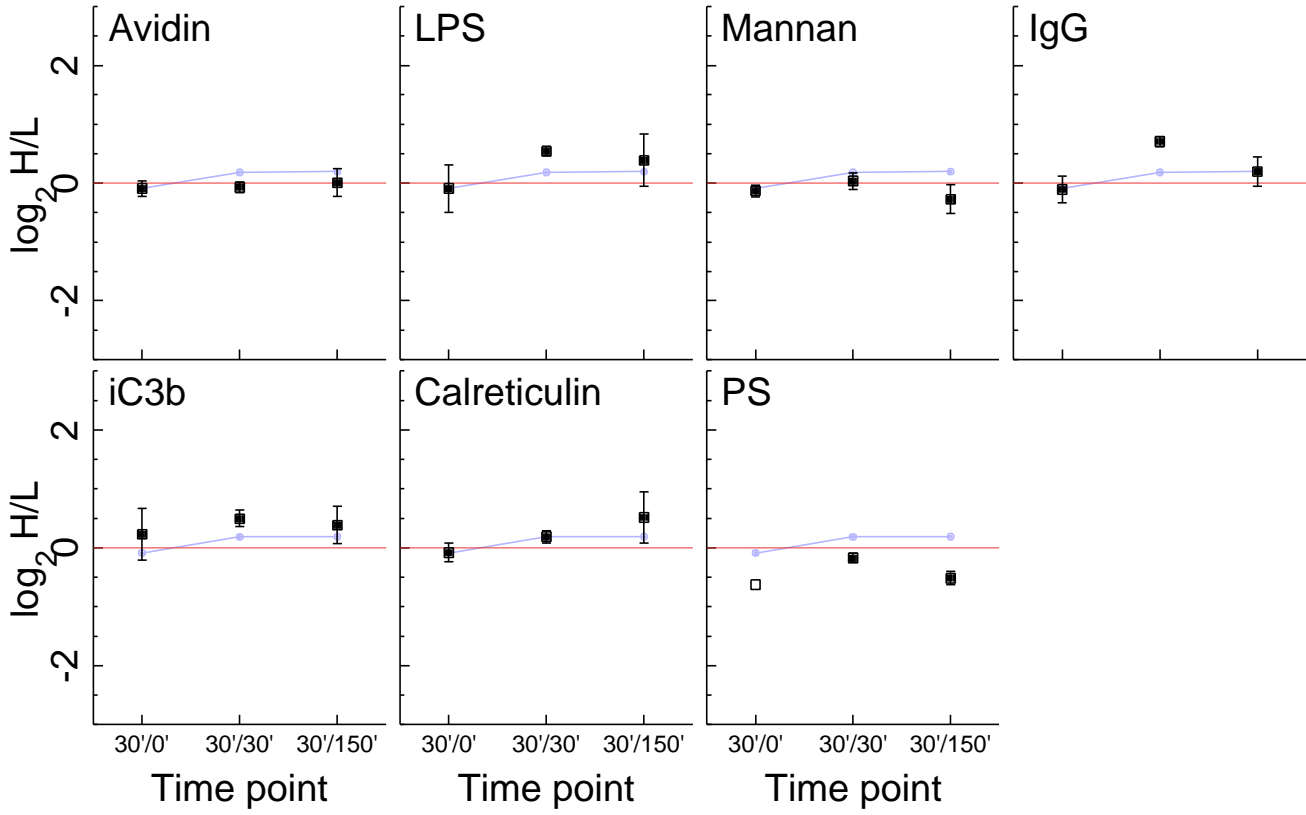

ccdc88b (Q4QRL3)

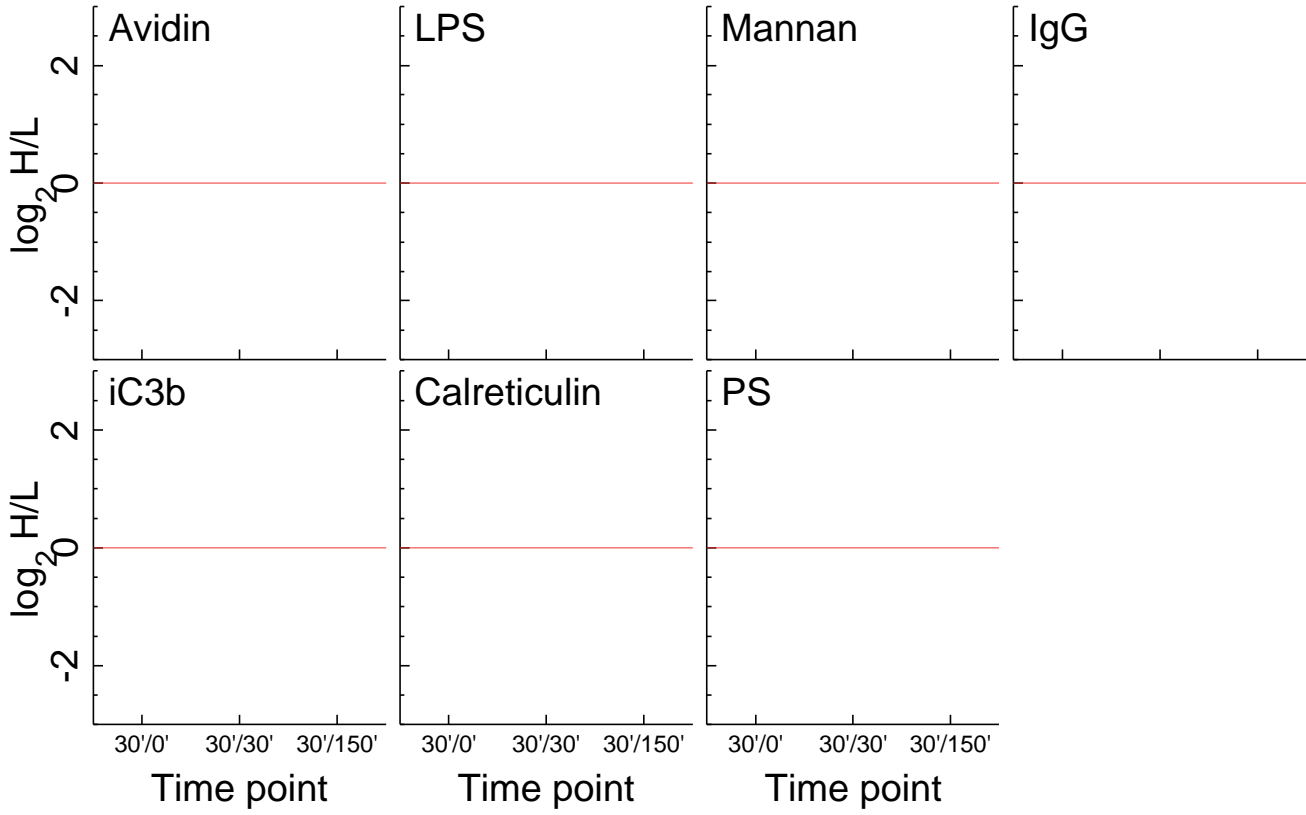

ccdc93 (Q7TQK5)

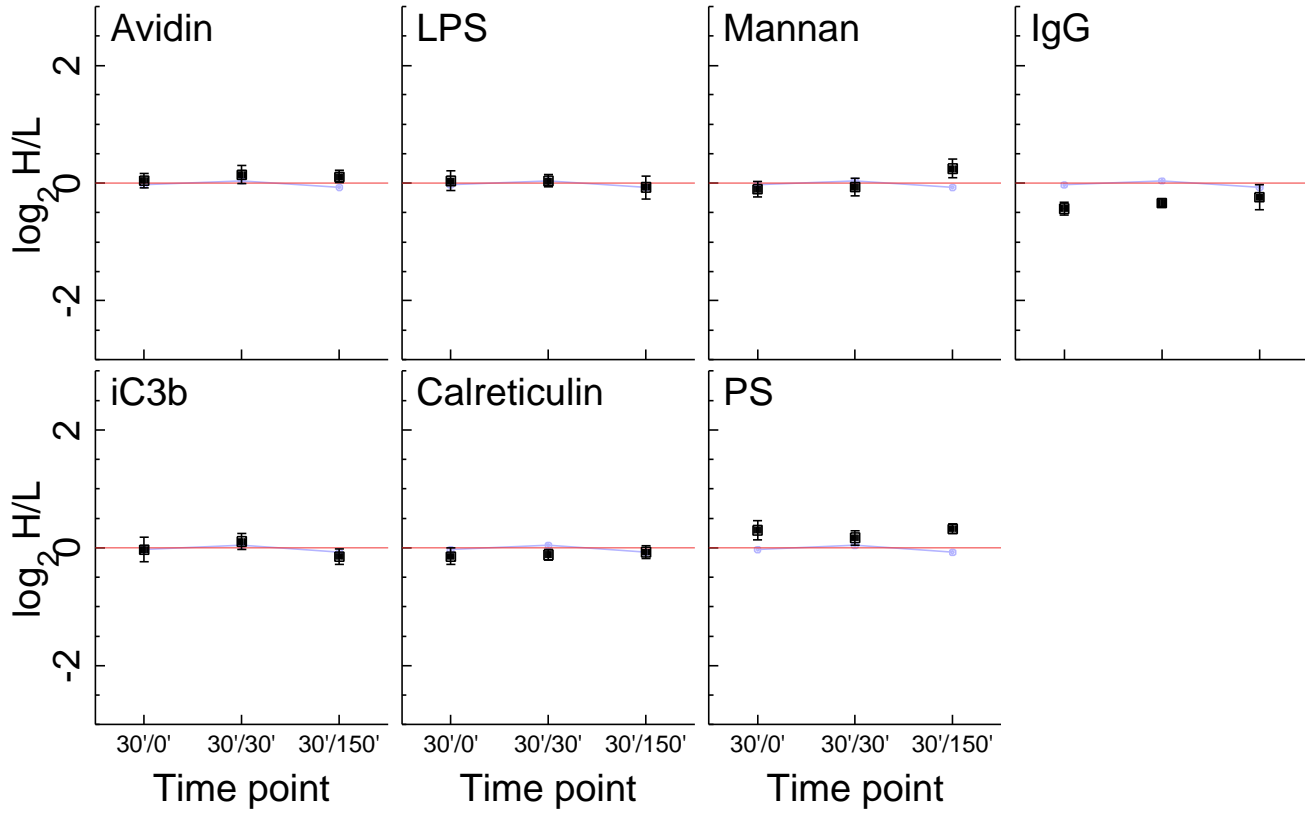

cct2 (P80314)

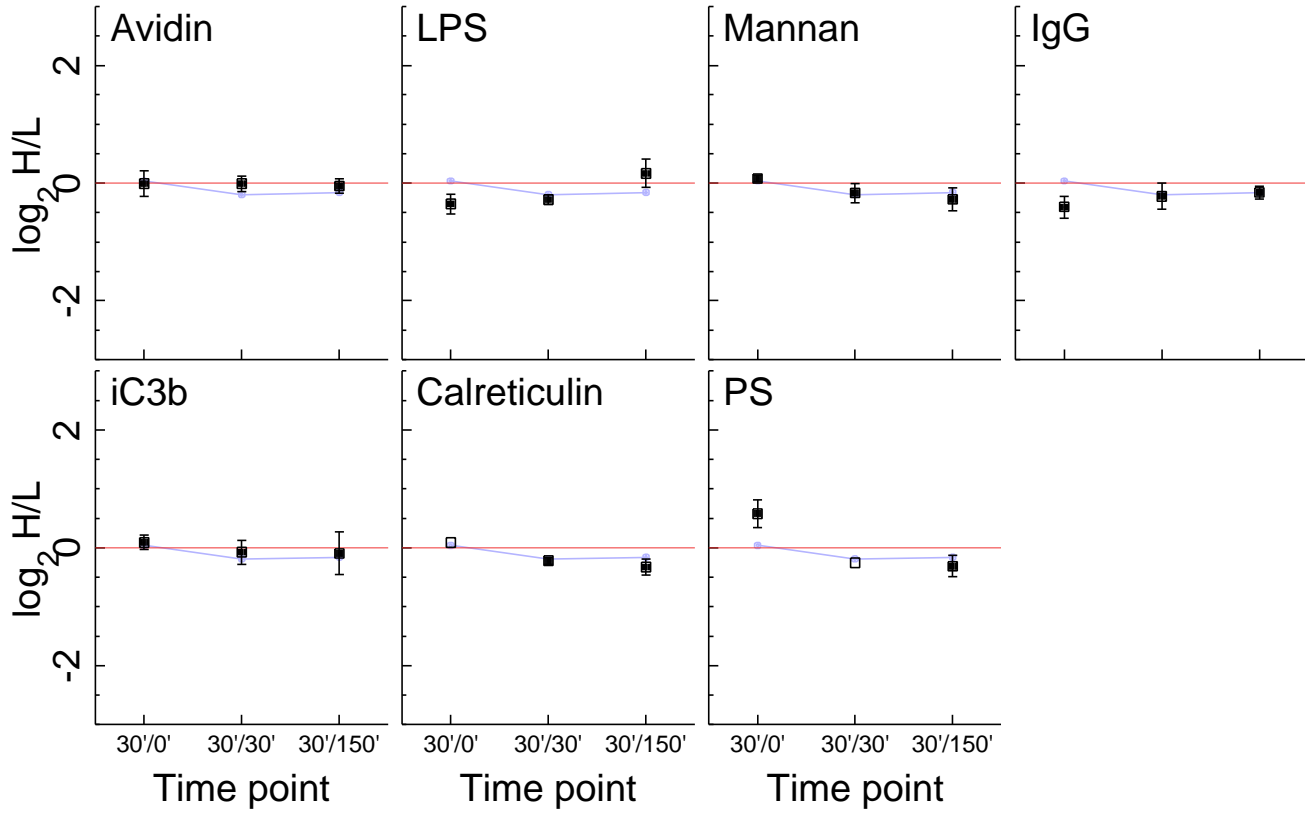

cct3 (P80318)

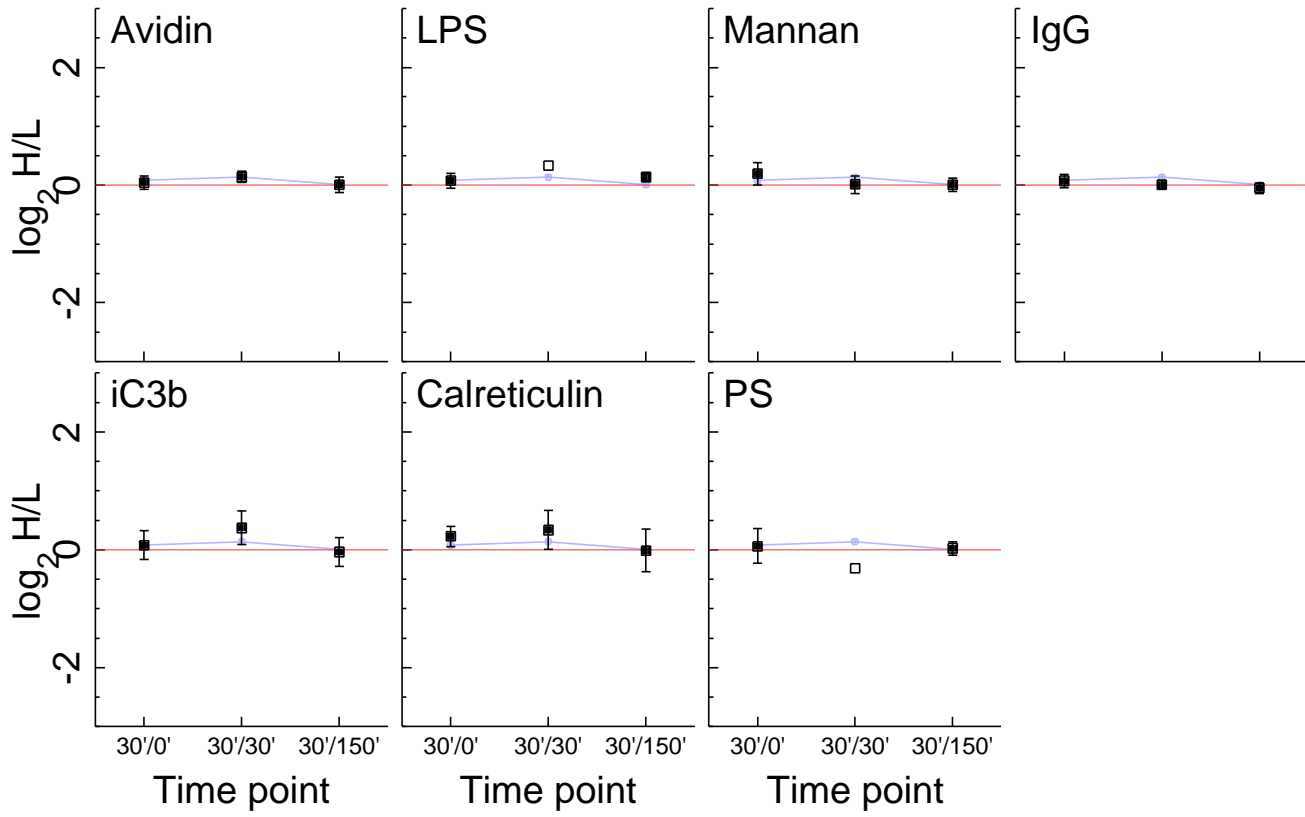



cct4 (P80315)

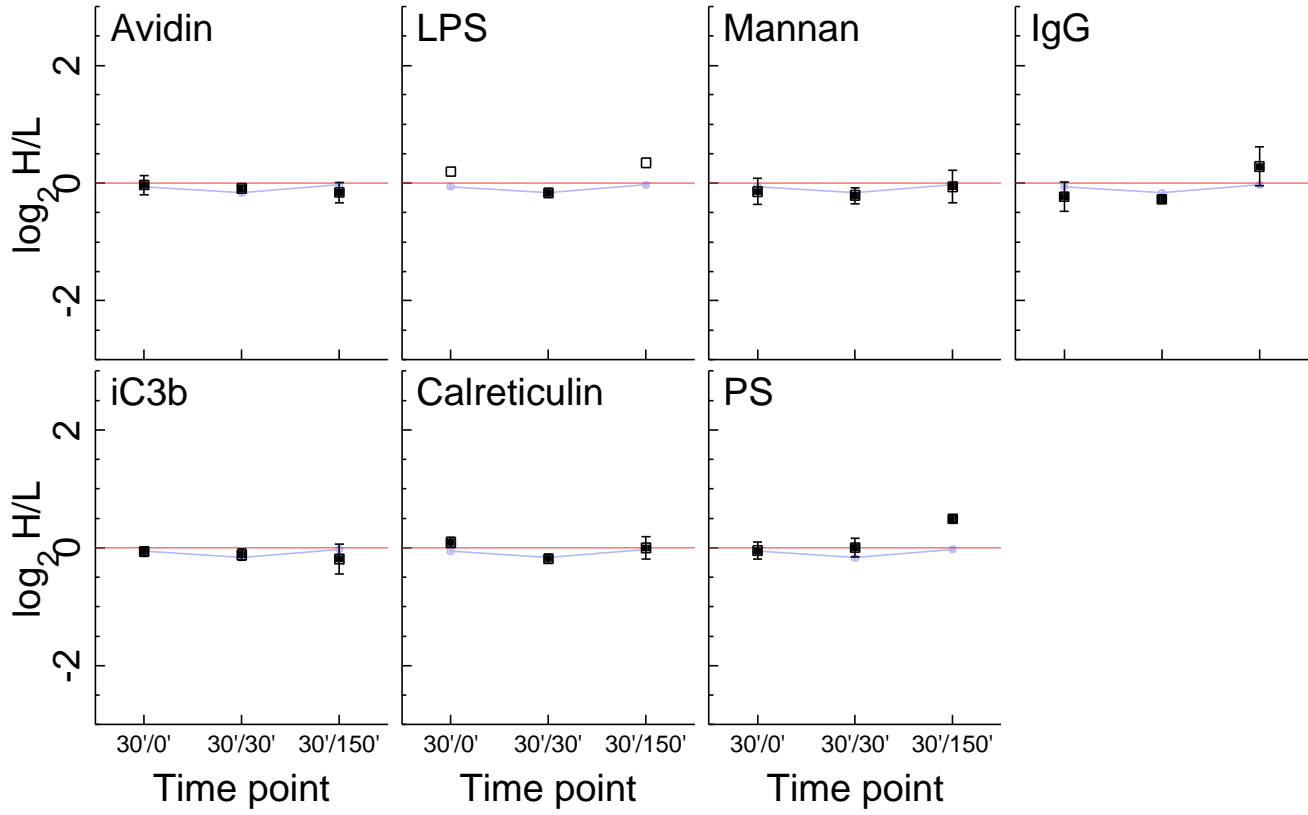

cct5 (P80316)

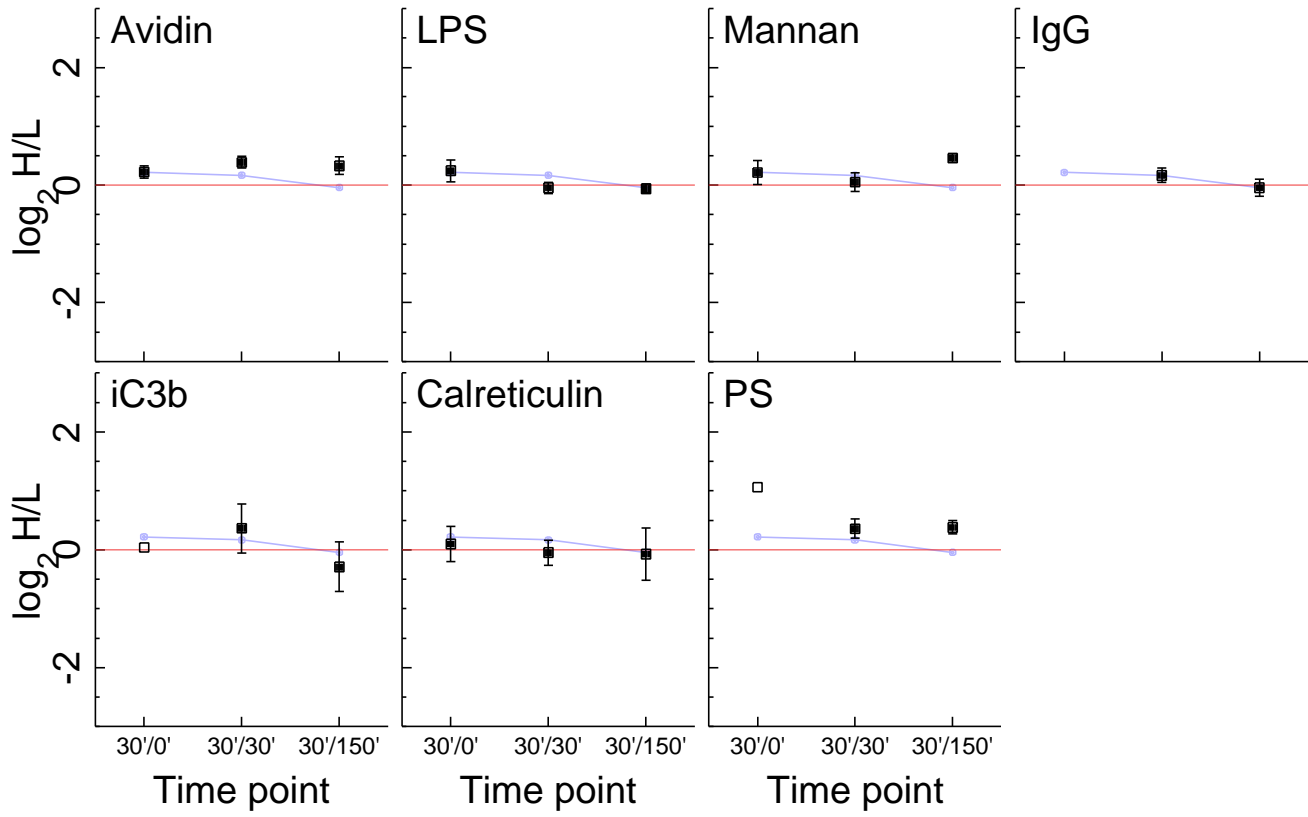

cct6a (E9QPA6)

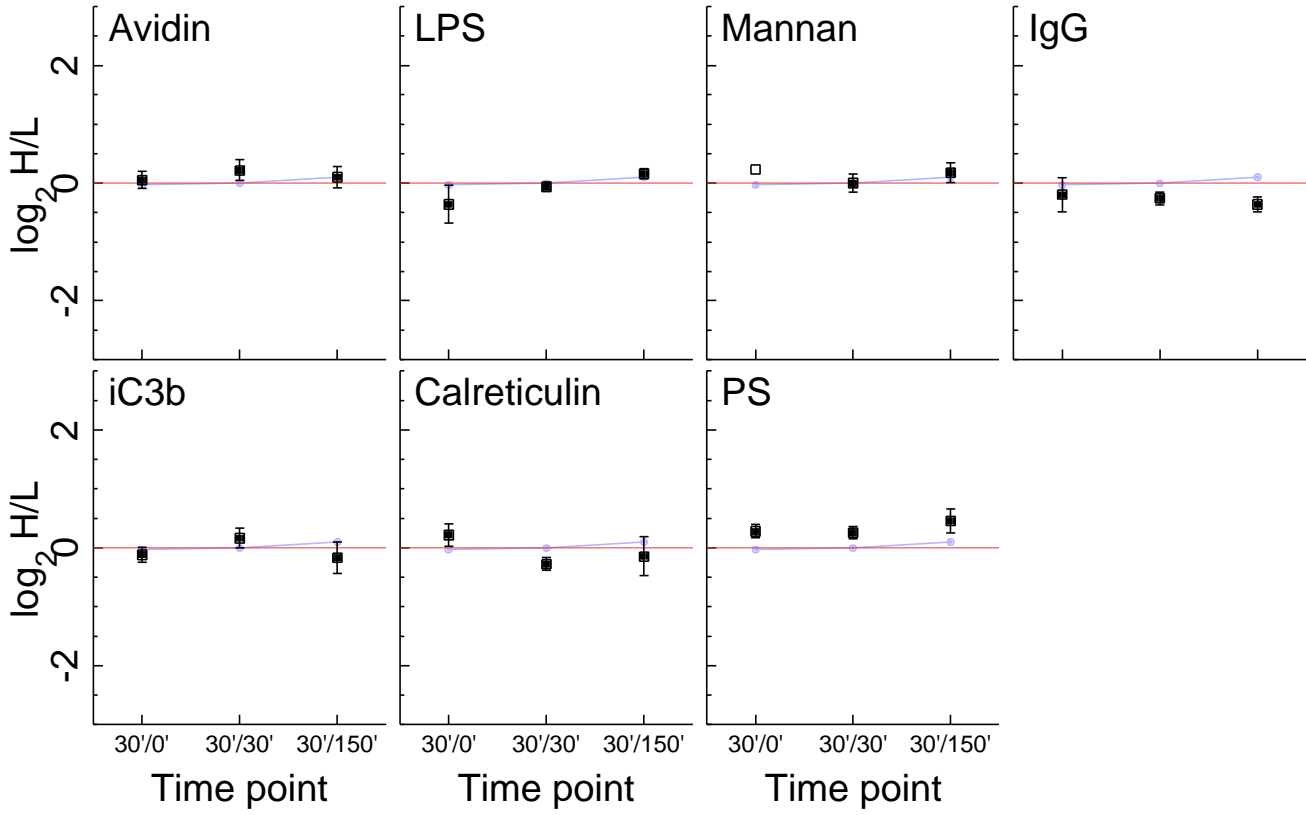

cct7 (P80313)

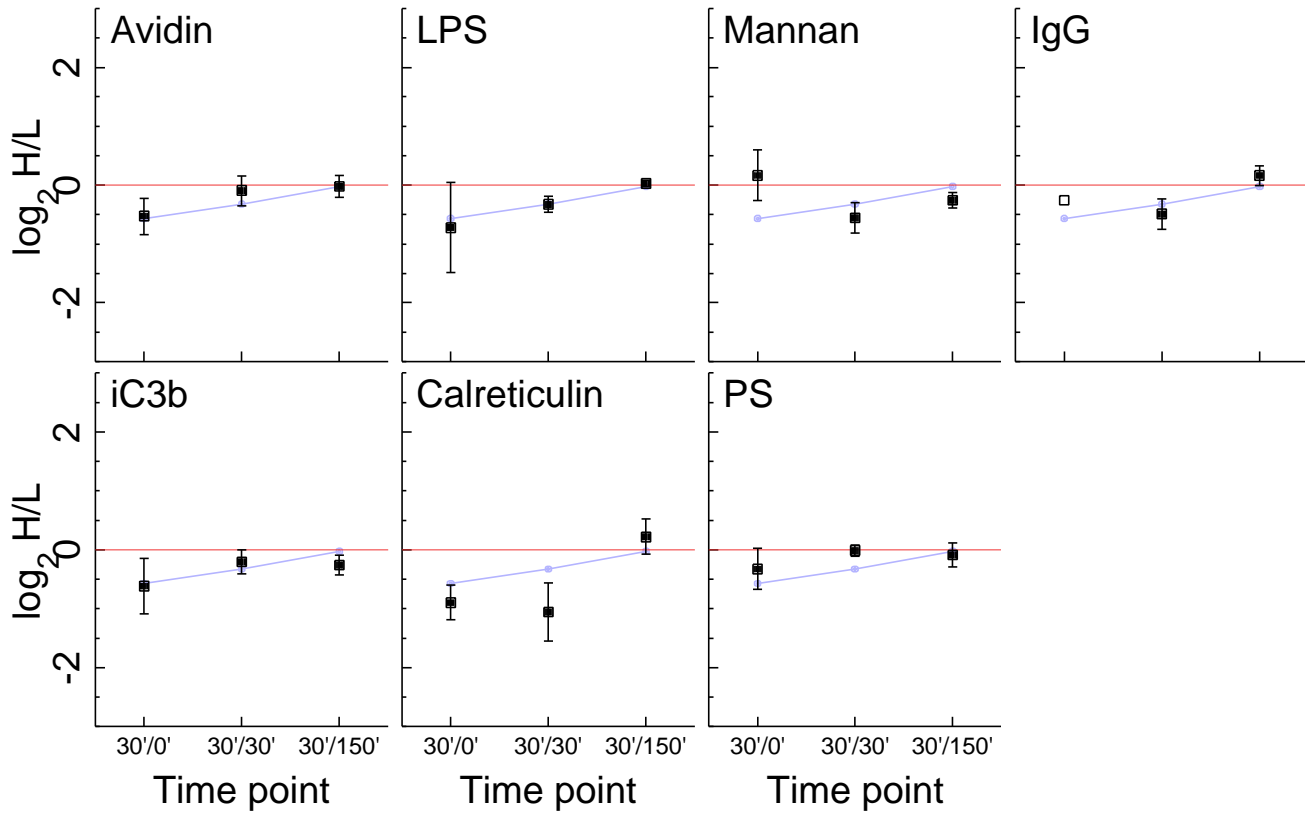

cct8 (P42932)

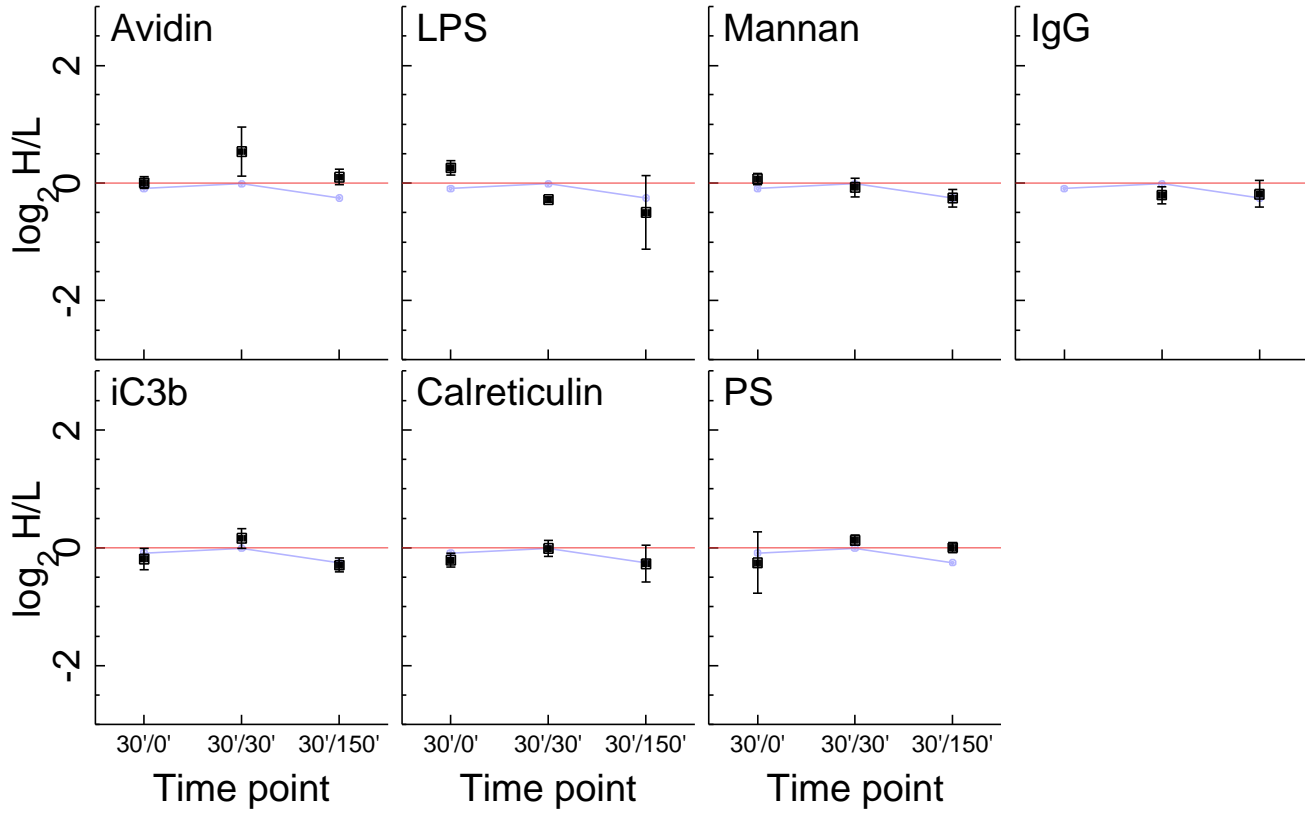

ccz1 (Q8C1Y8)

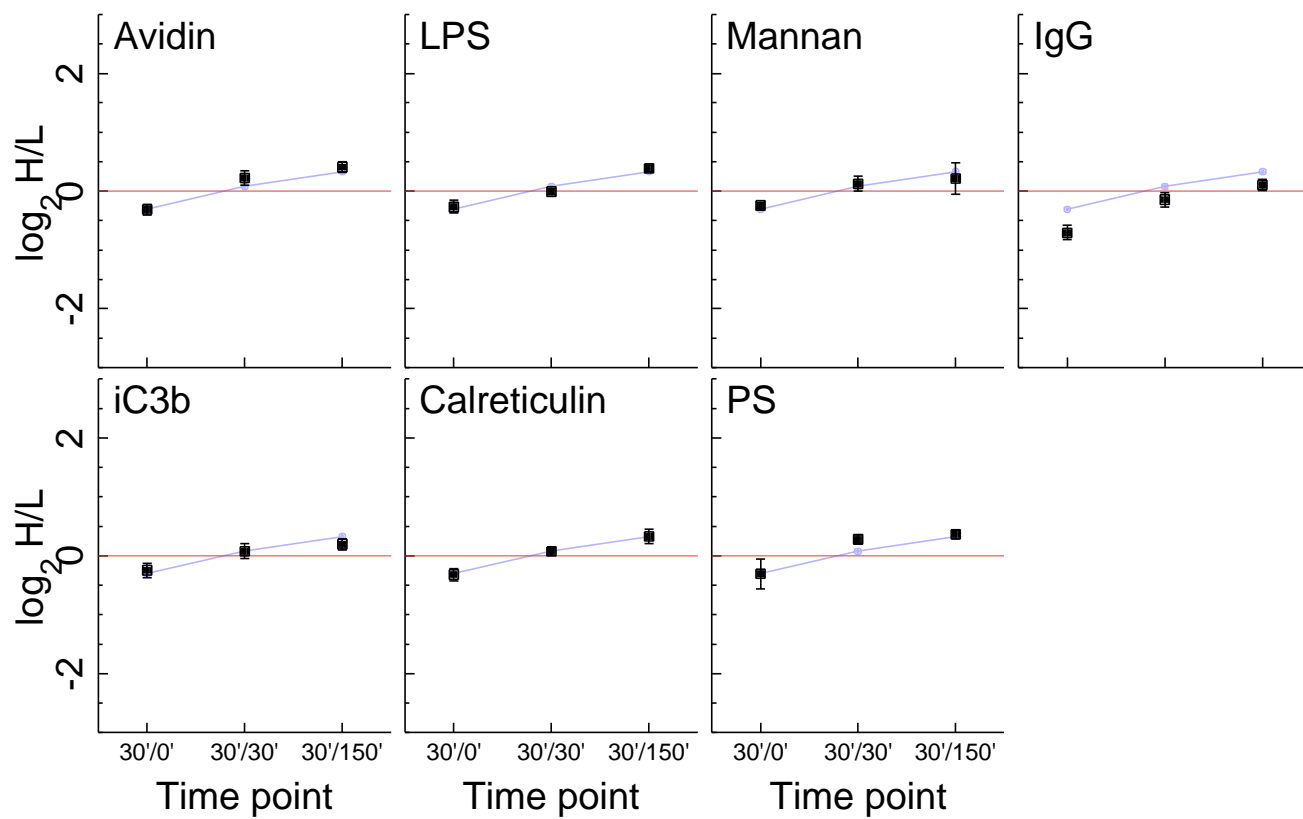

cd14 (P10810)

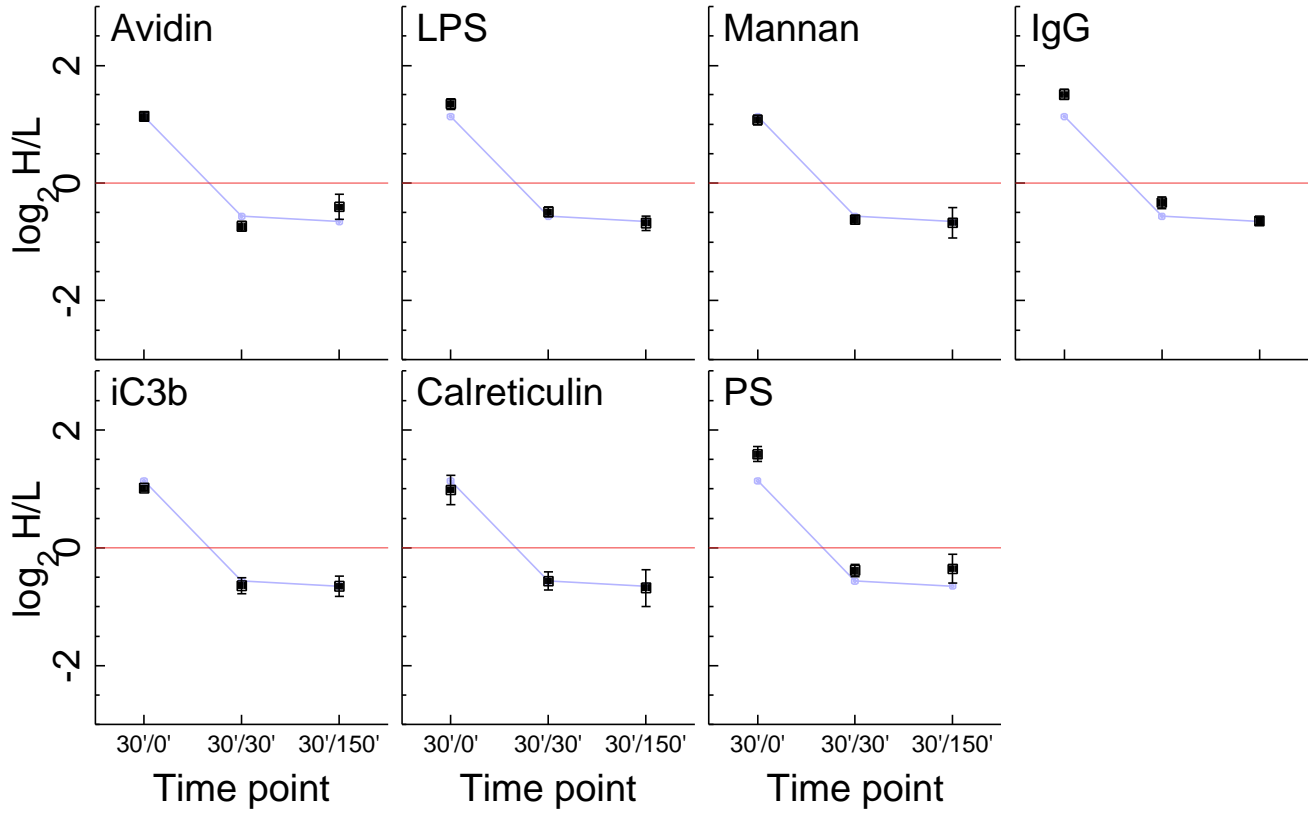

### cd151 (O35566)

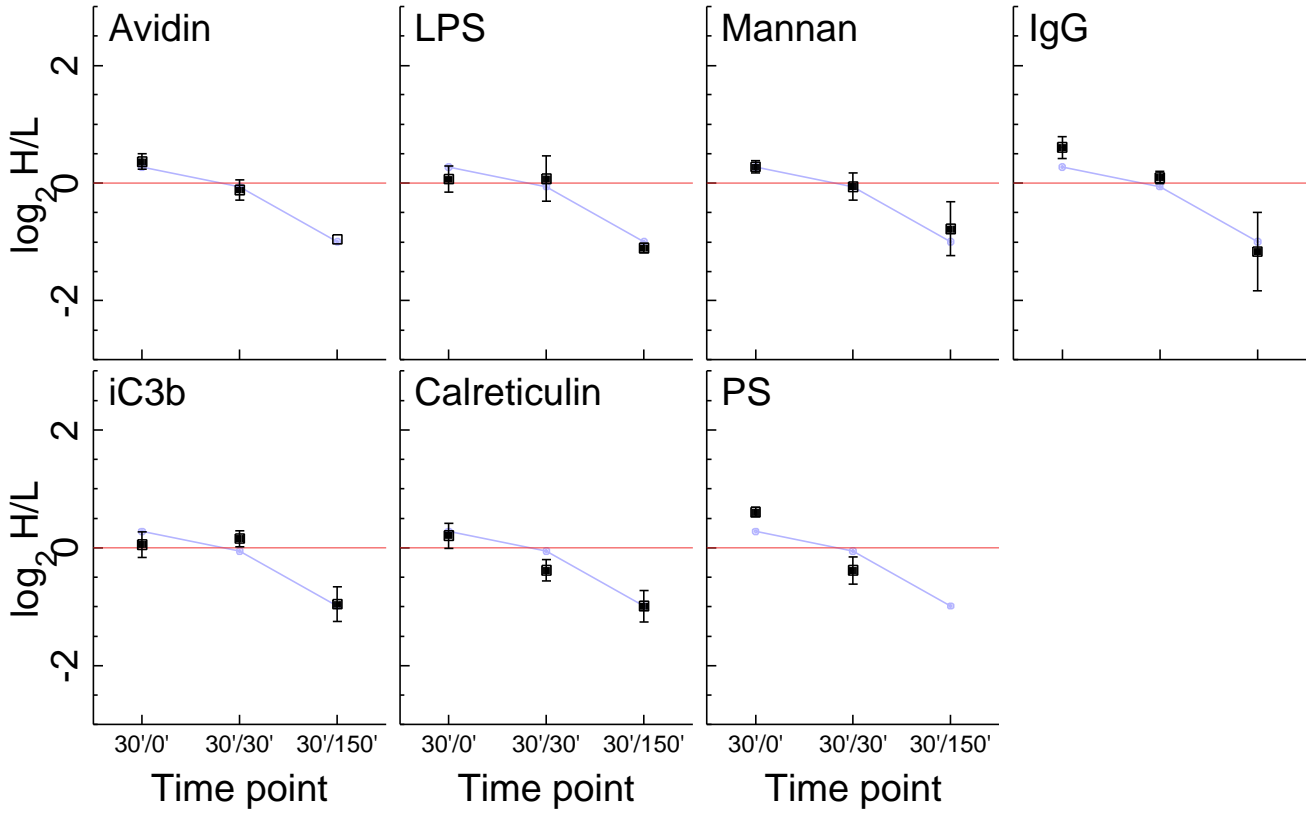



### cd180 (Q62192)

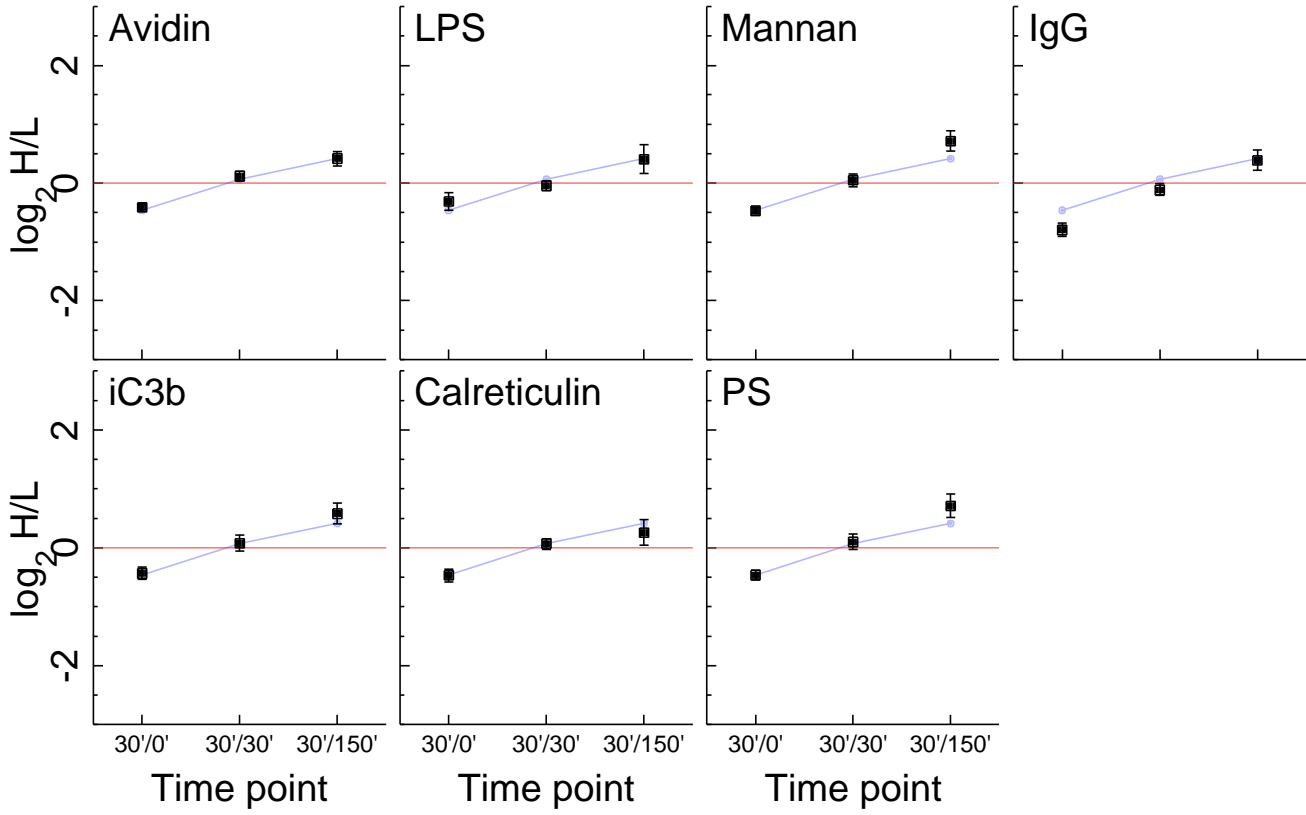

cd1d1 (P11609)

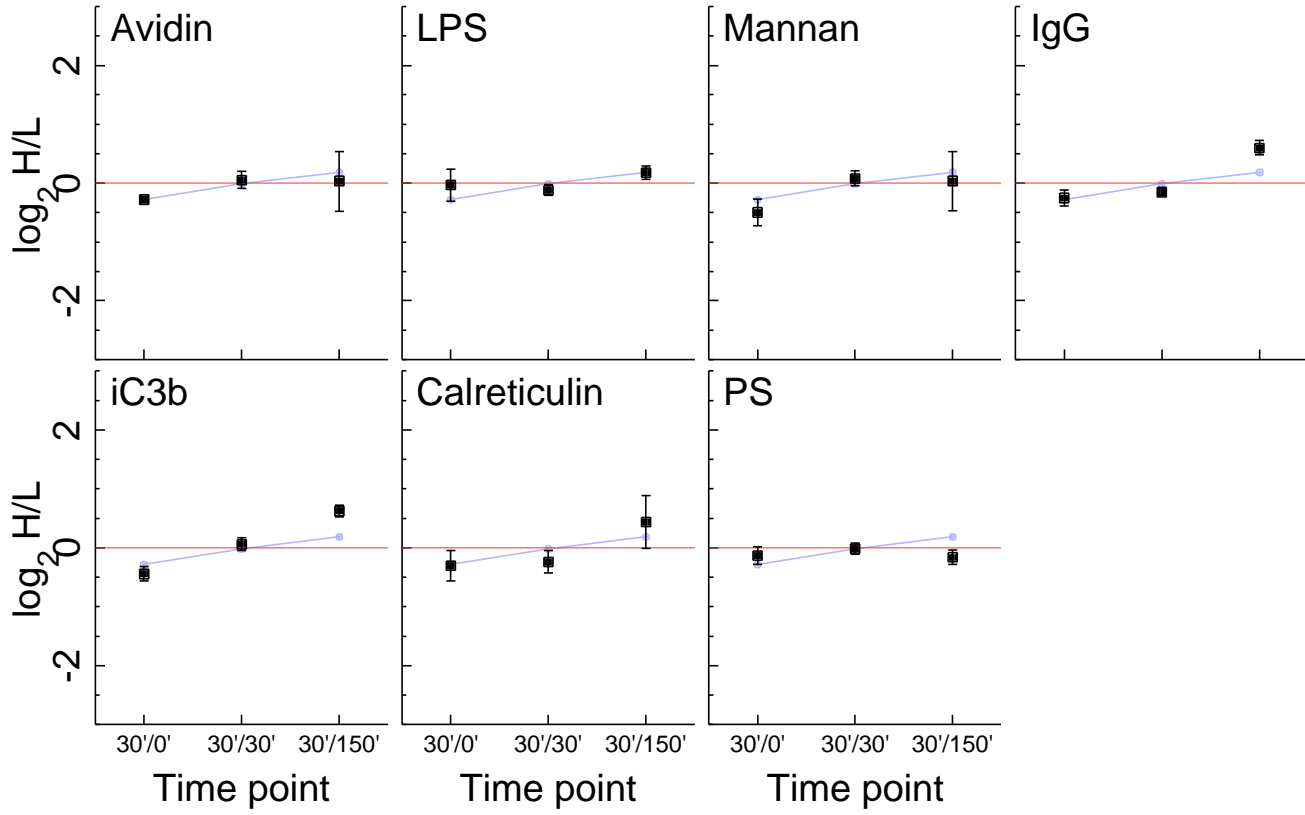

### cd200r1 (Q9ES57)

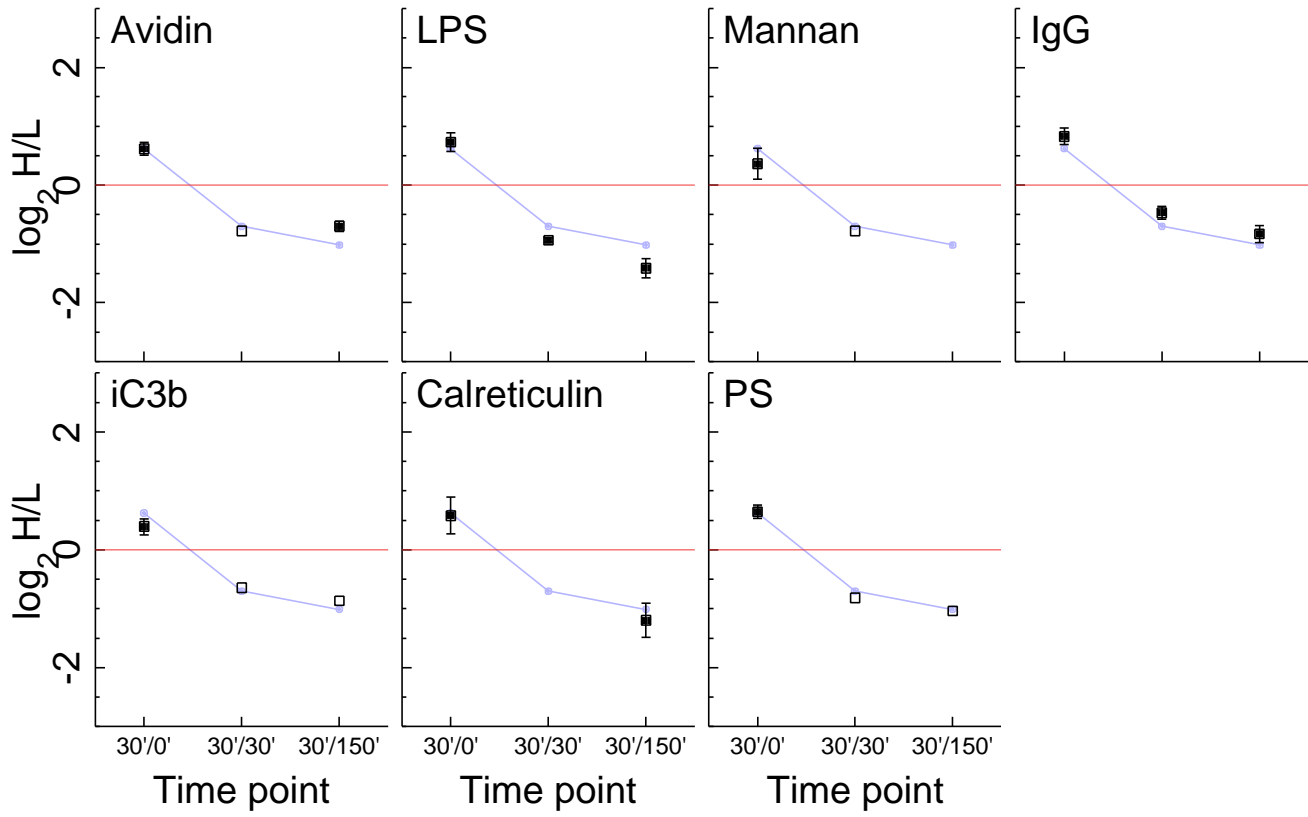

cd2ap (Q9JLQ0)

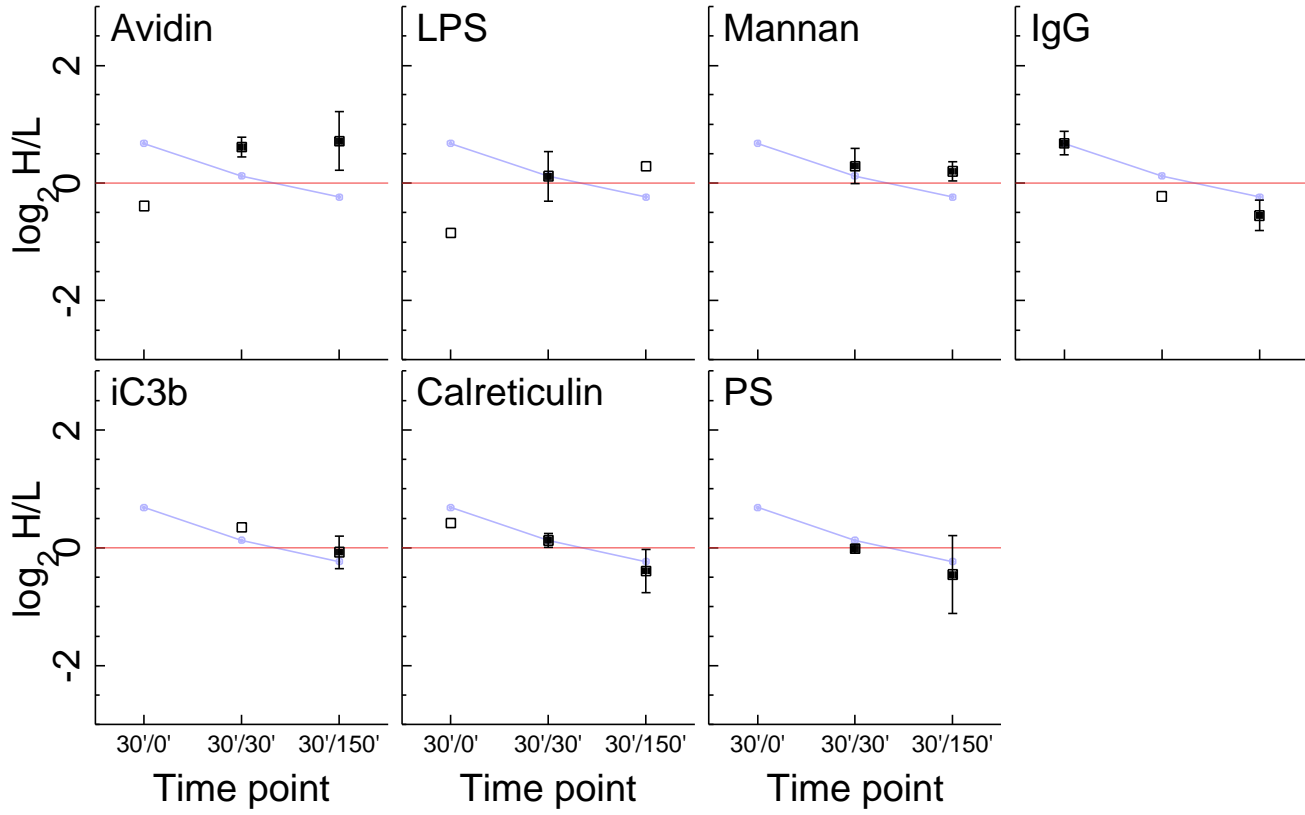

### cd300a (Q6SJQ0)

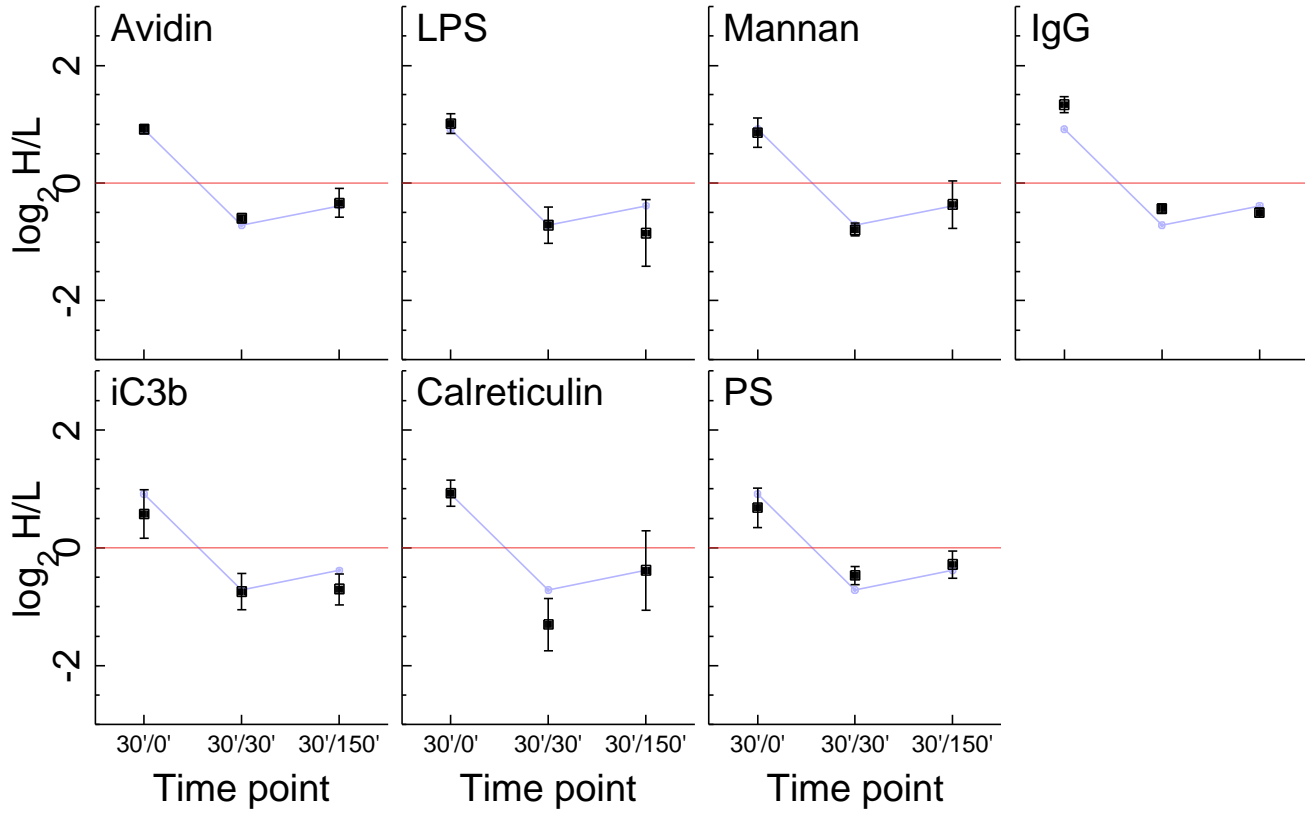

cd300lh (Q6SJQ5)

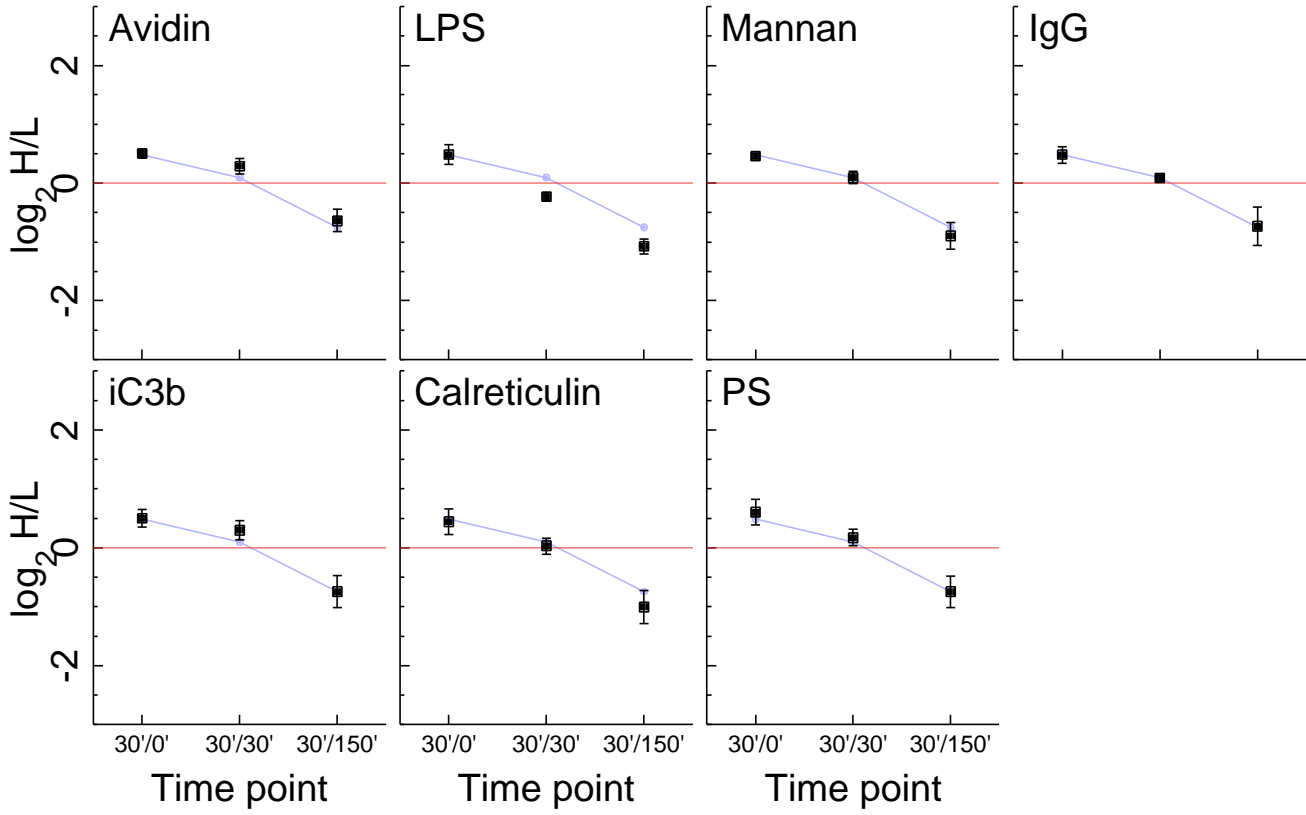

### cd36 (Q08857)

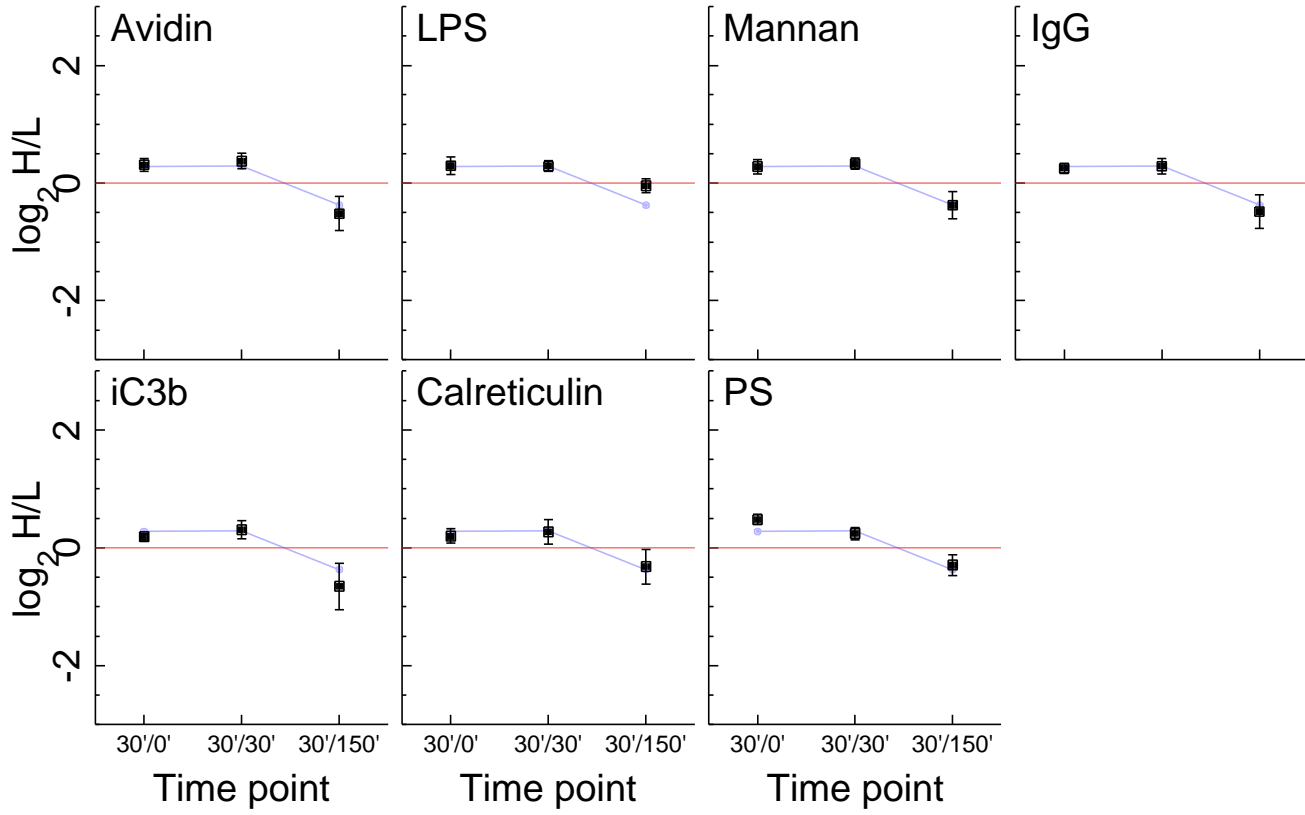

### cd44 (A2APM2)

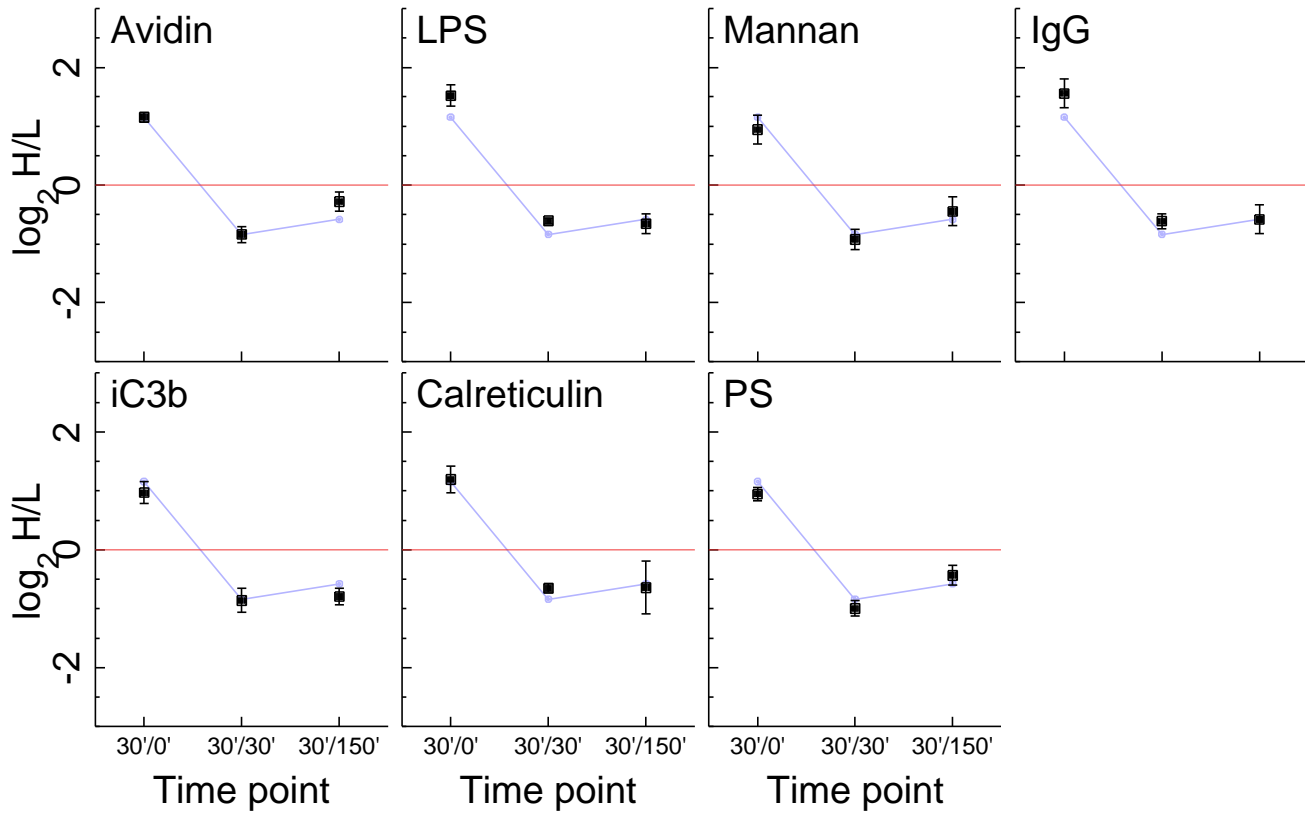



### cd47 (Q61735)

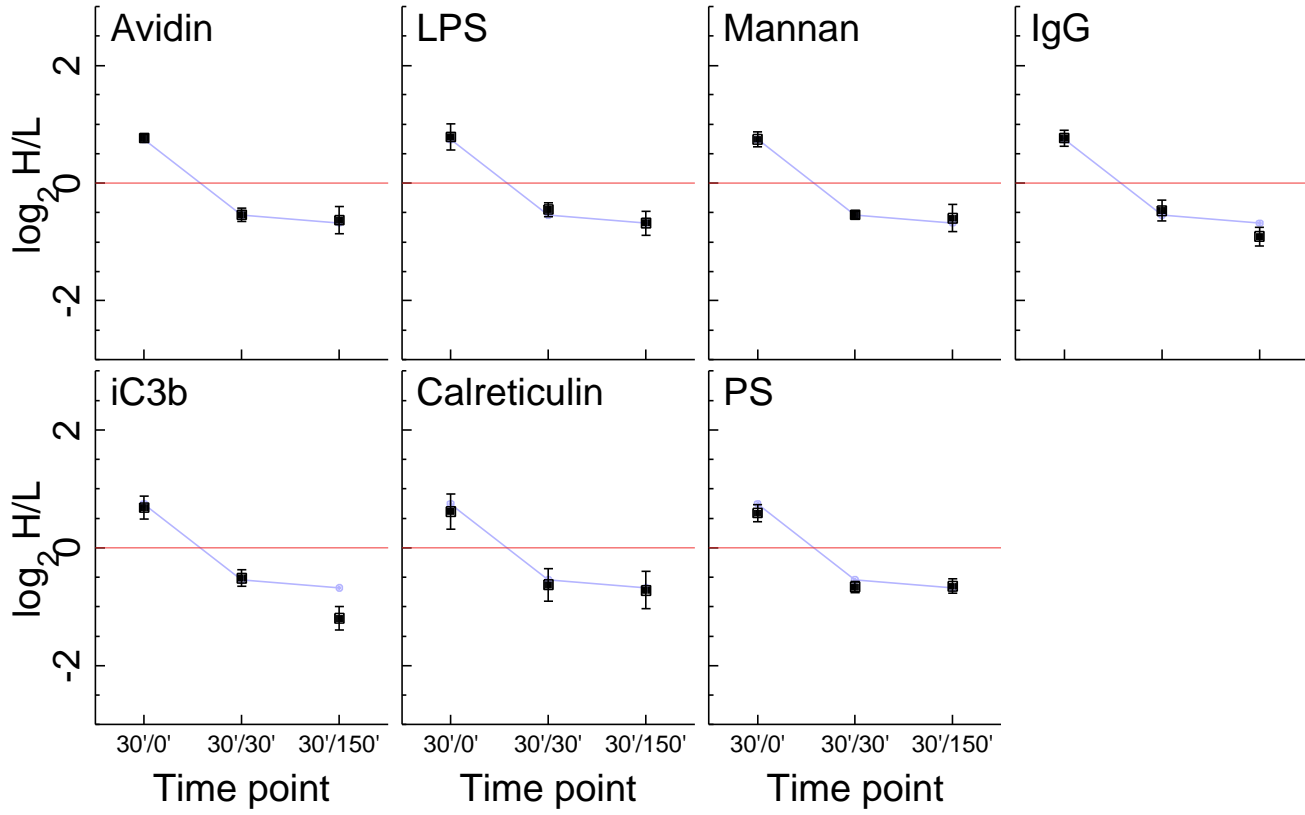

### cd48 (P18181)

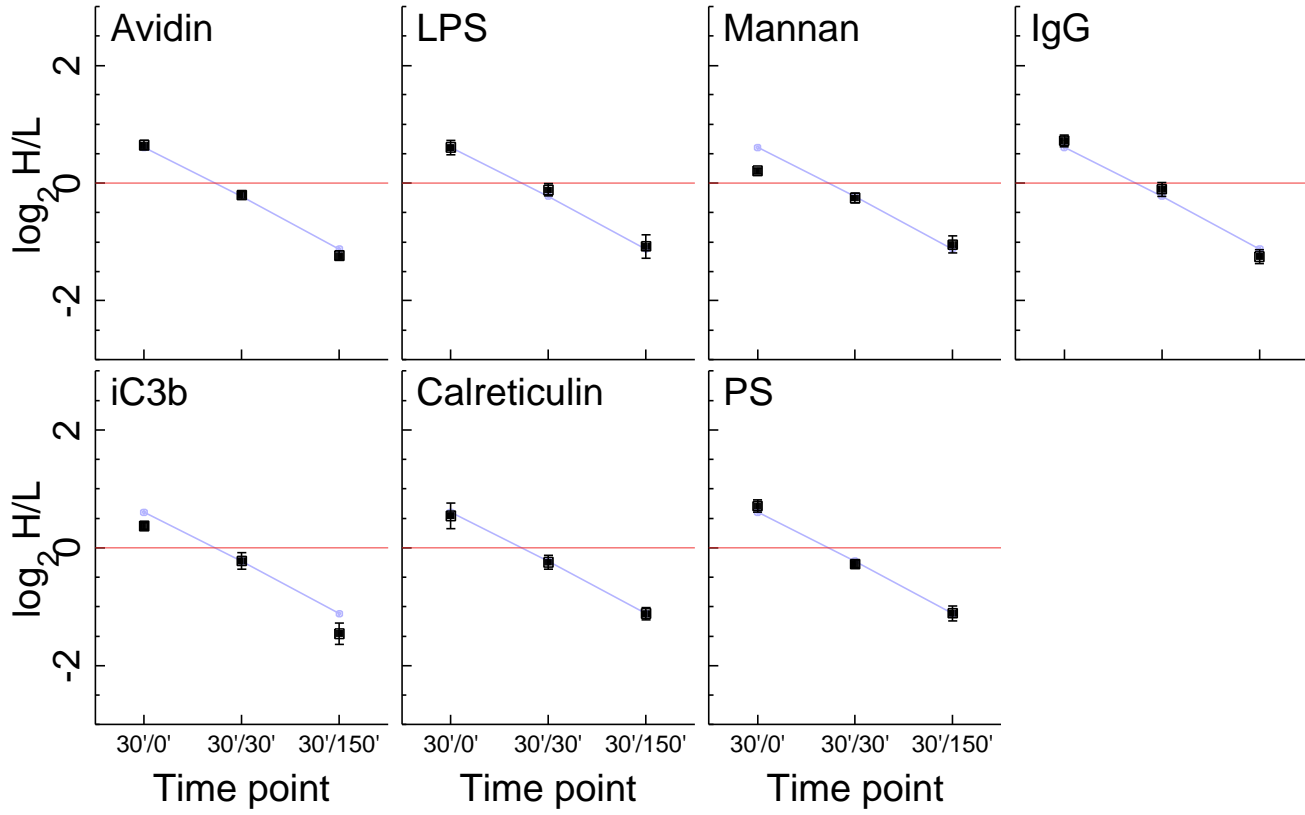

### cd5l (Q9QWK4)

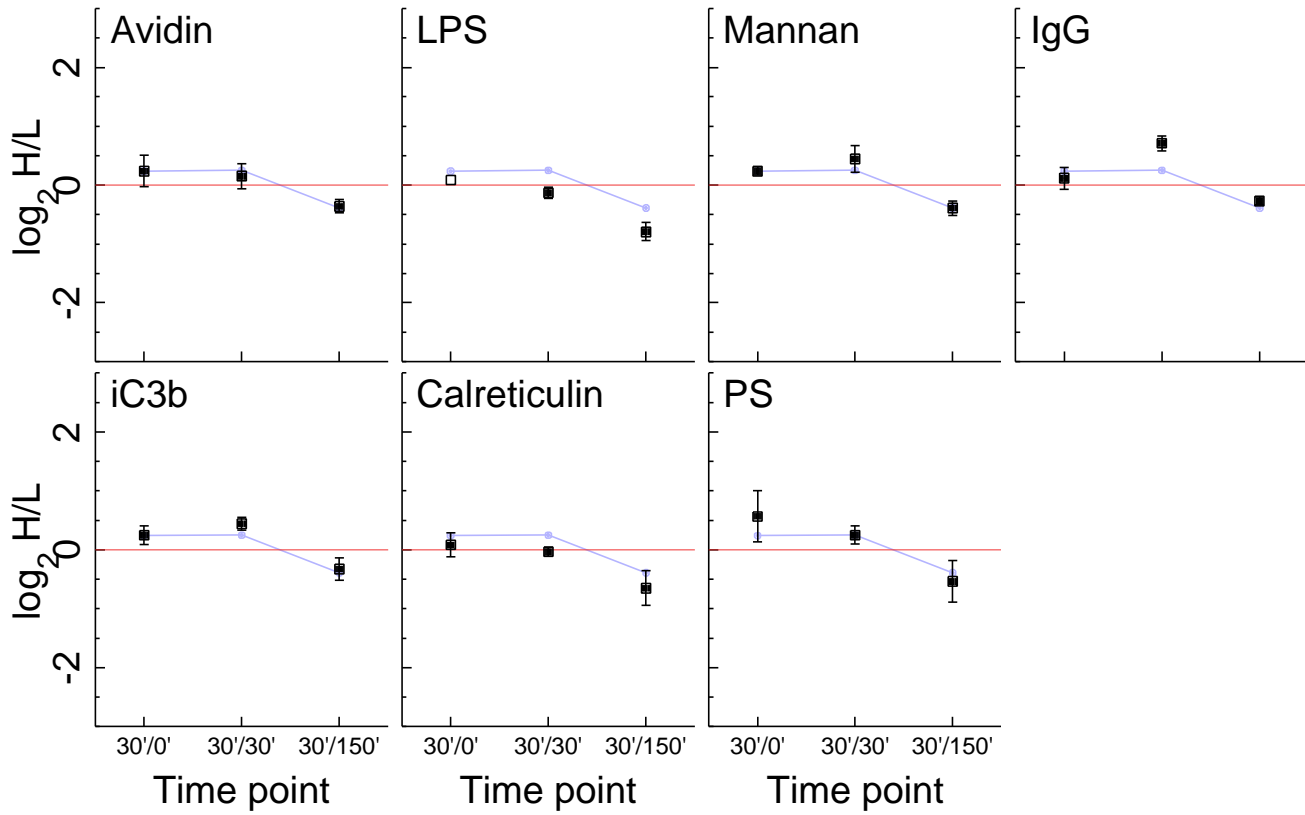

### cd63 (P41731)

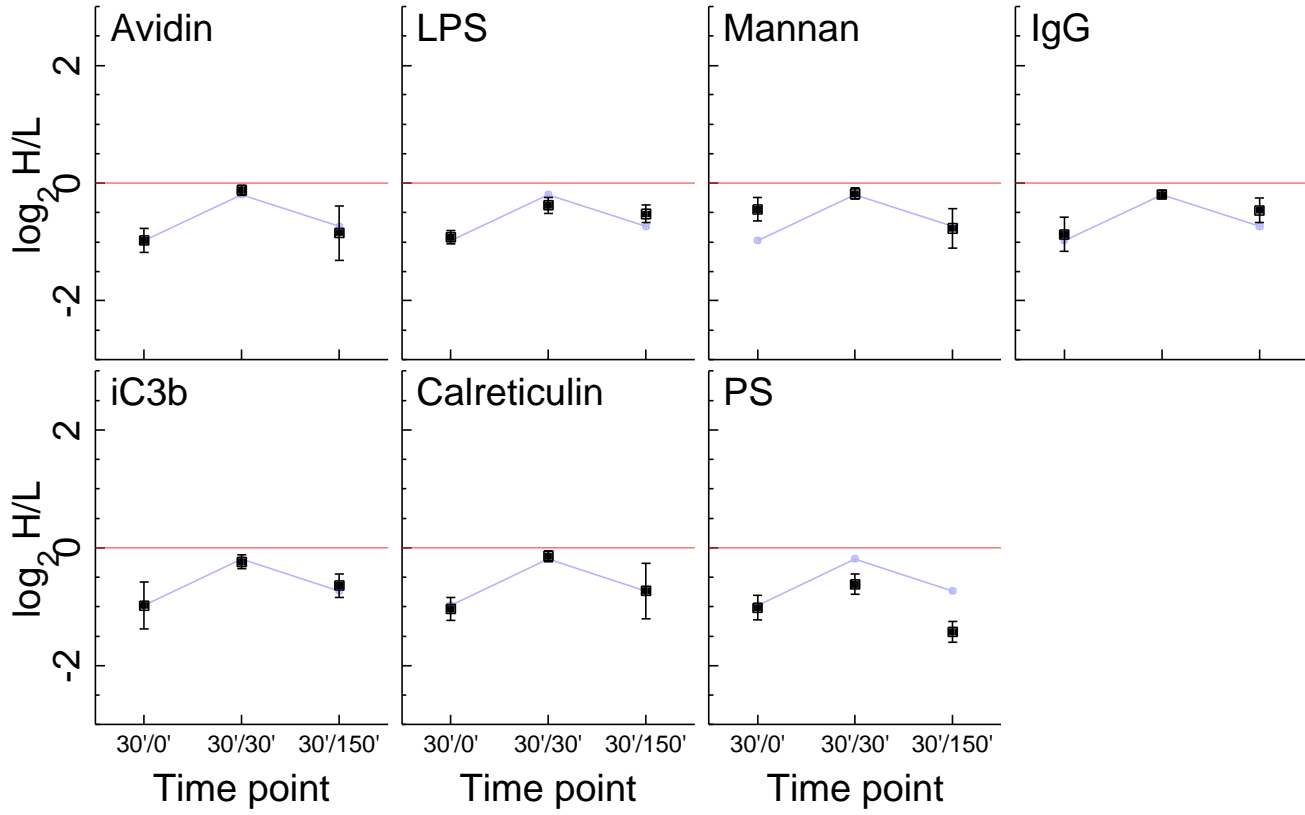

cd68 (P31996)

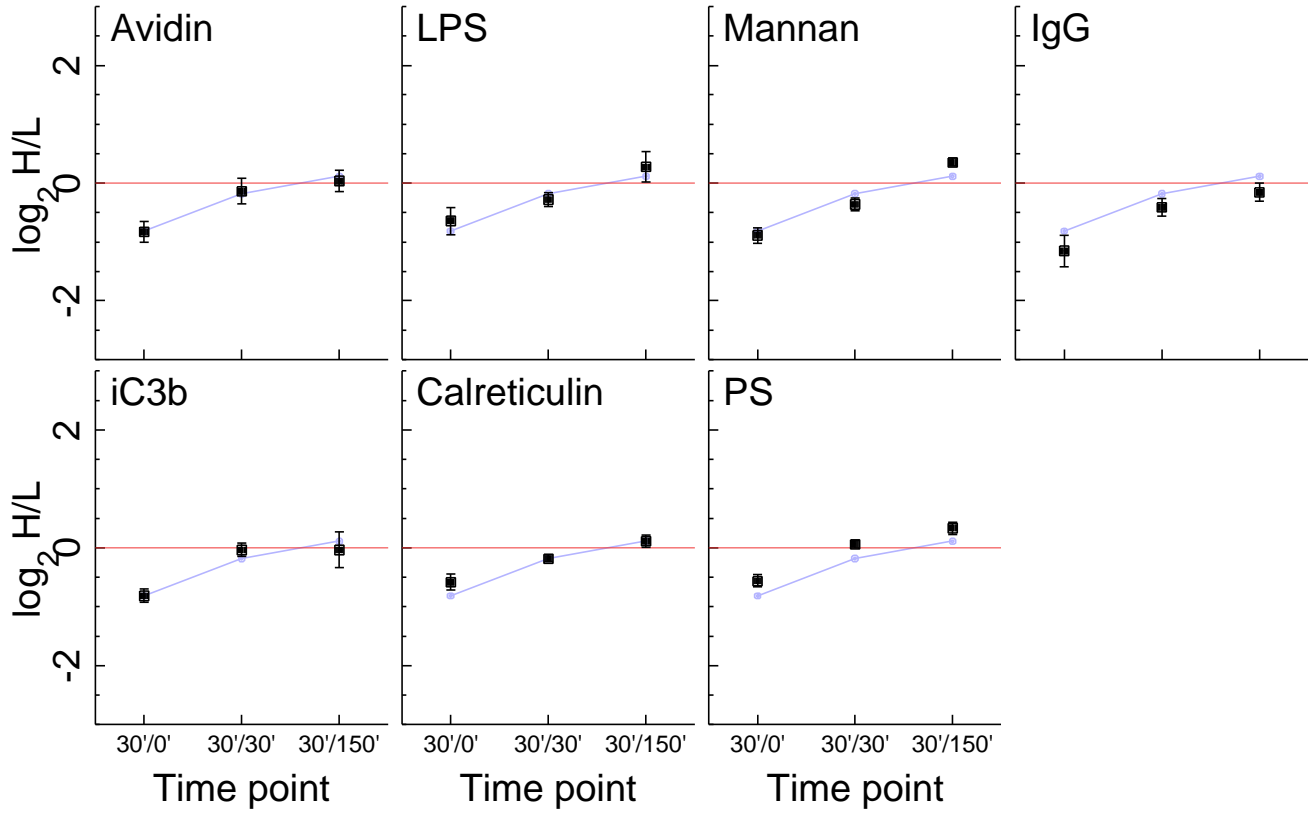

### cd72 (P21855)

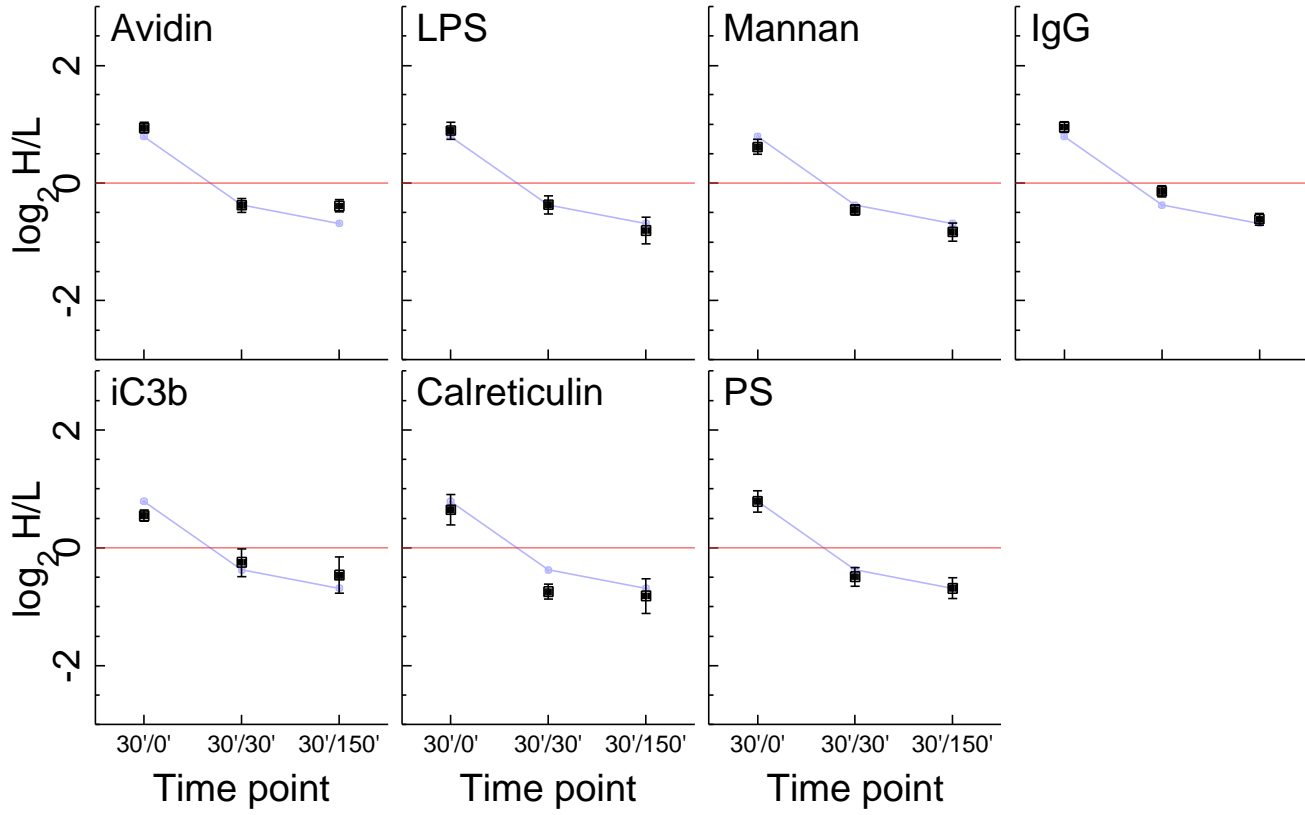

### cd74 (P04441)

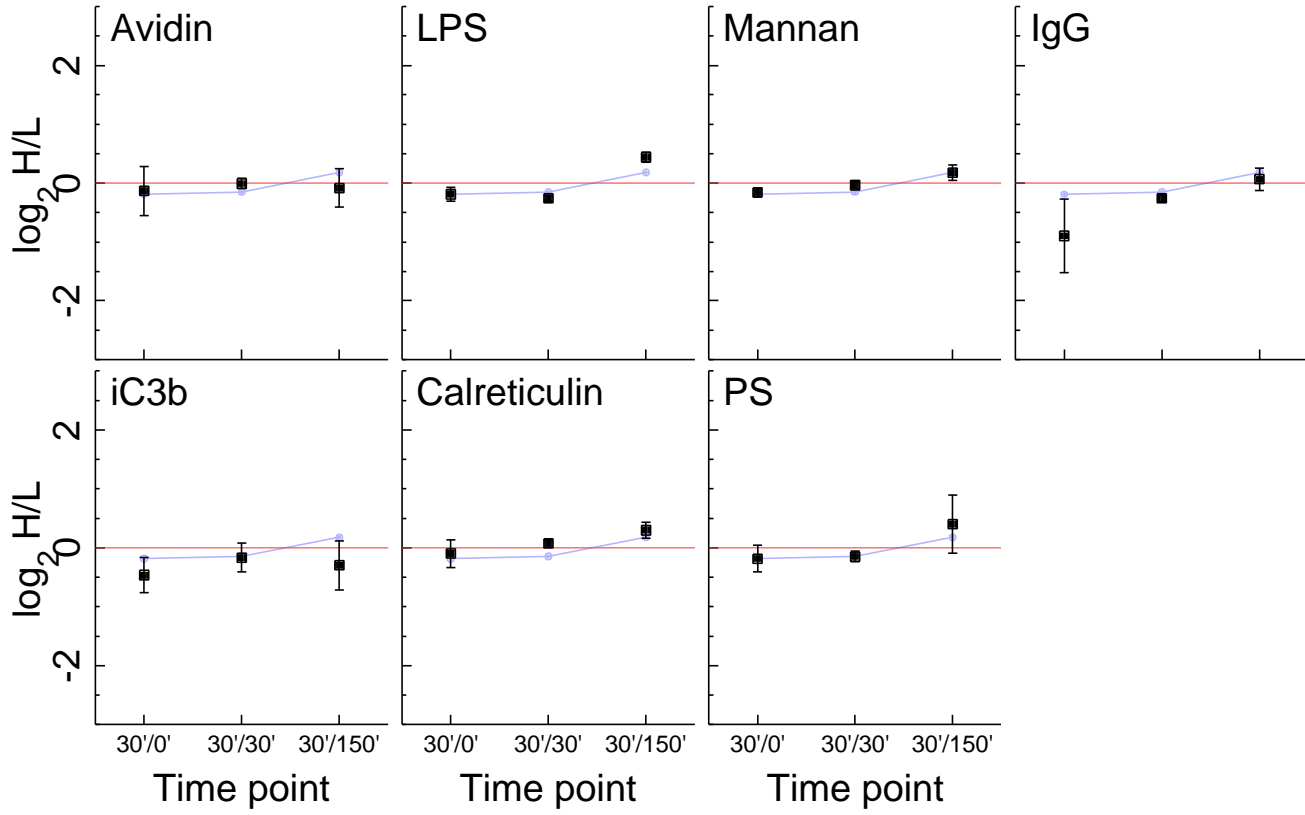

### cd81 (P35762)

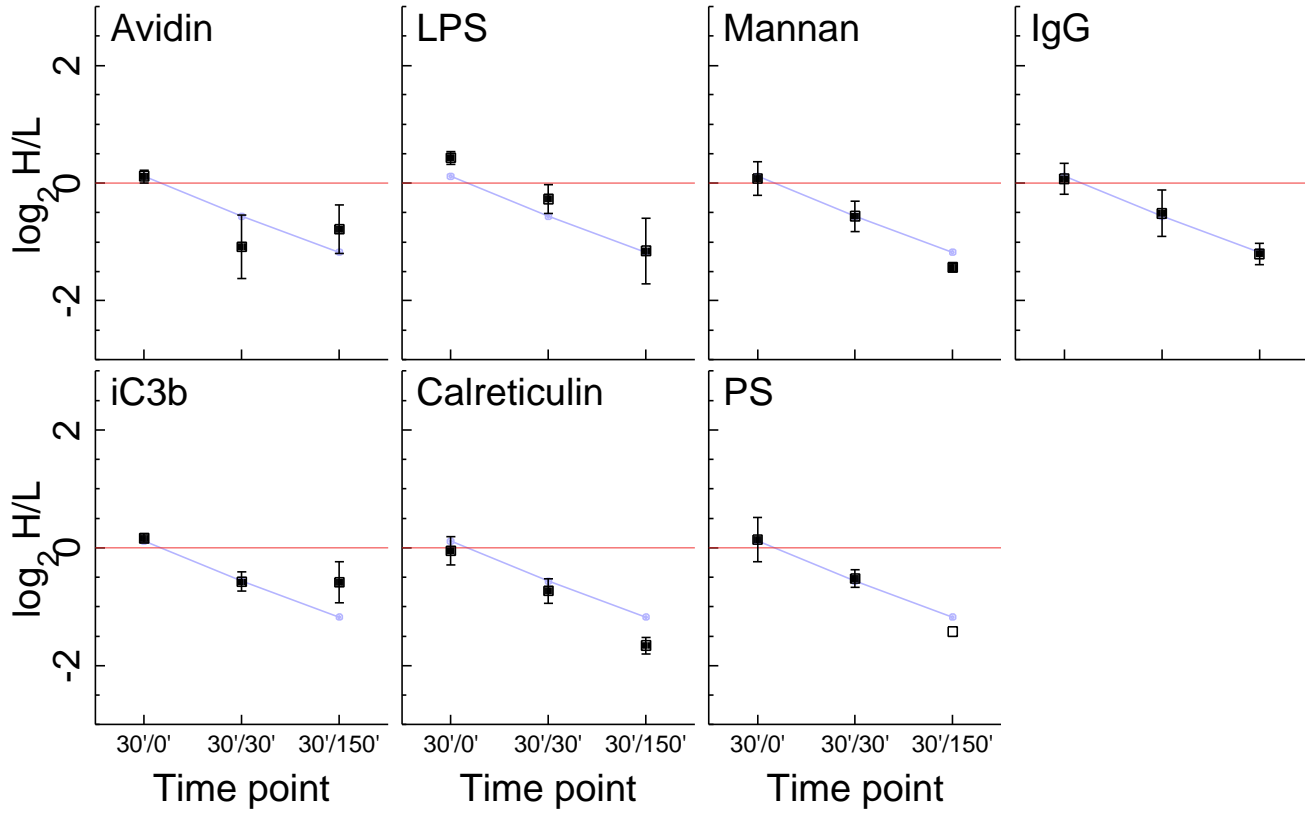



### cd82 (P40237)

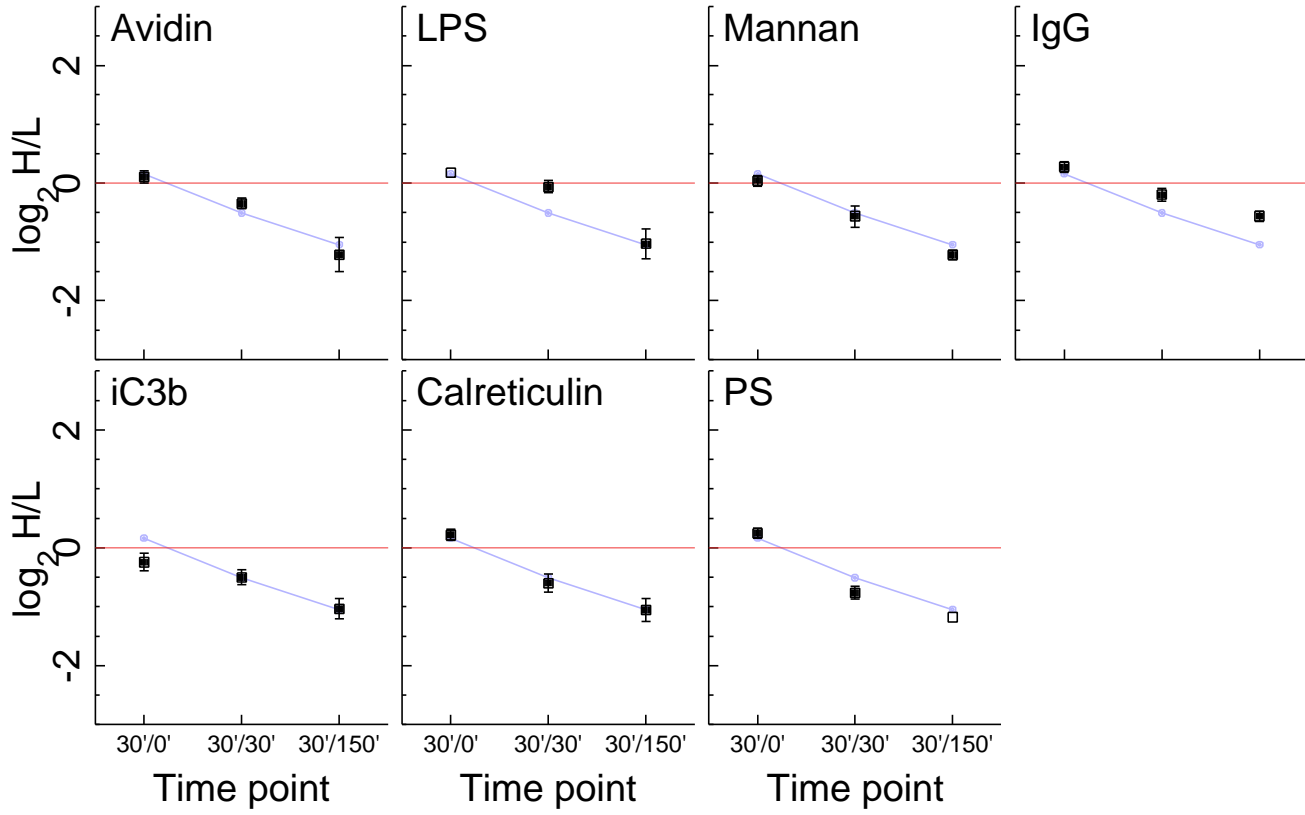

### cd84 (Q18PI6)

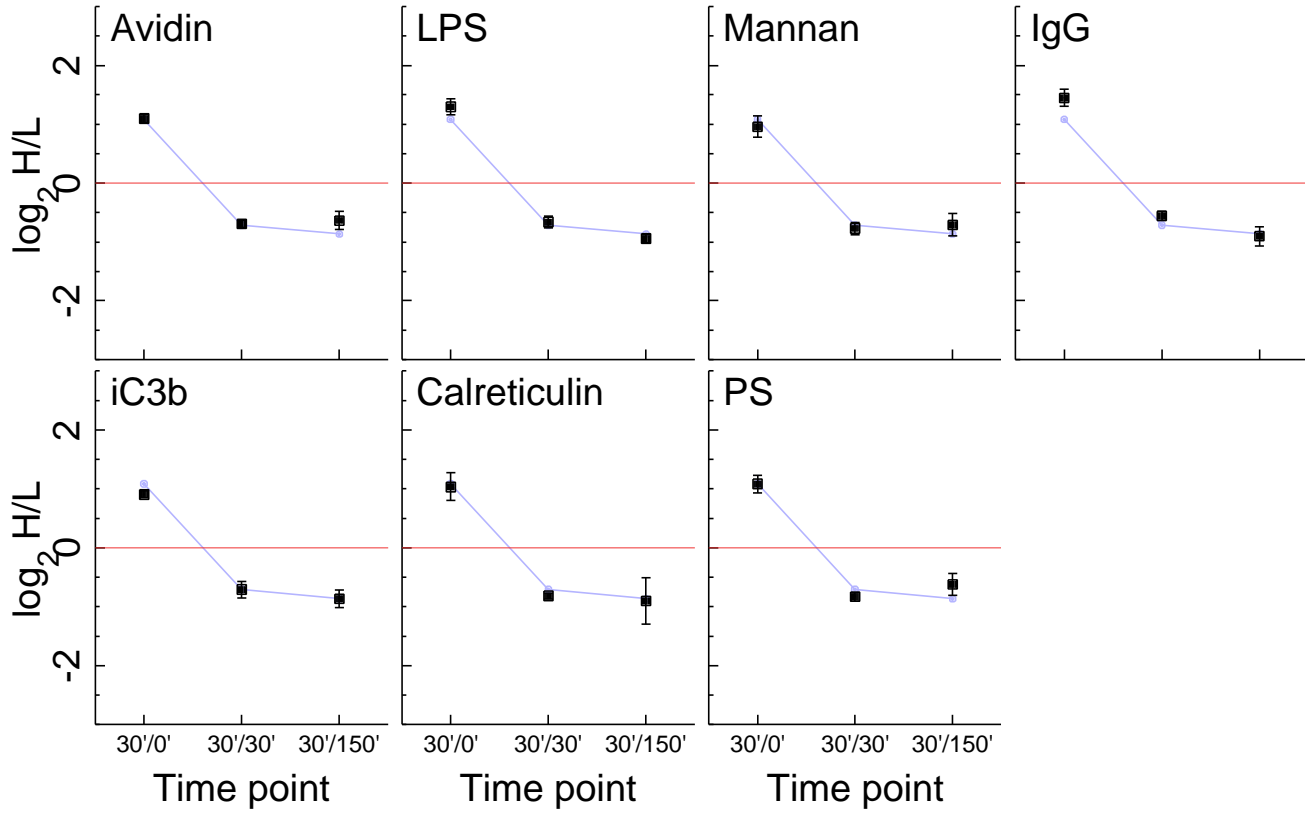

### cd93 (O89103)

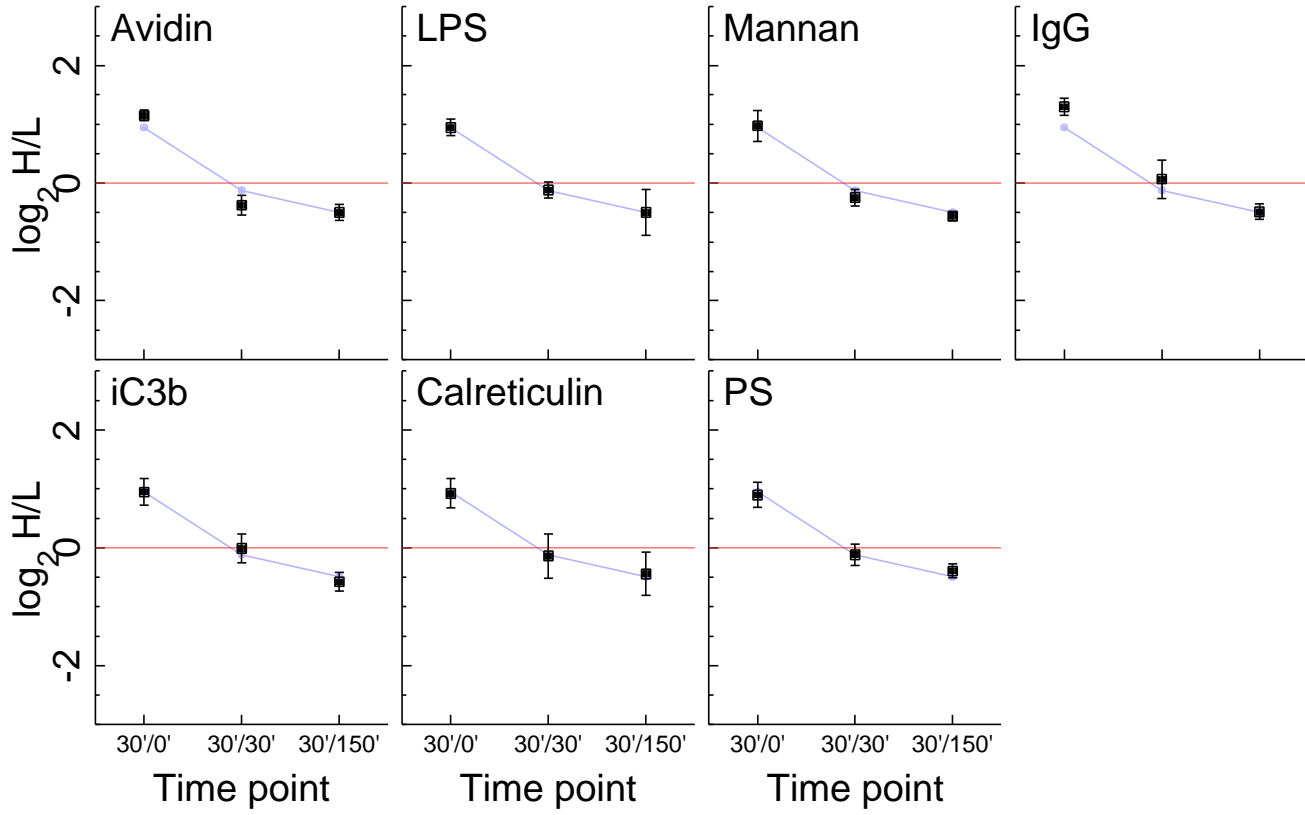

### cd9 (P40240)

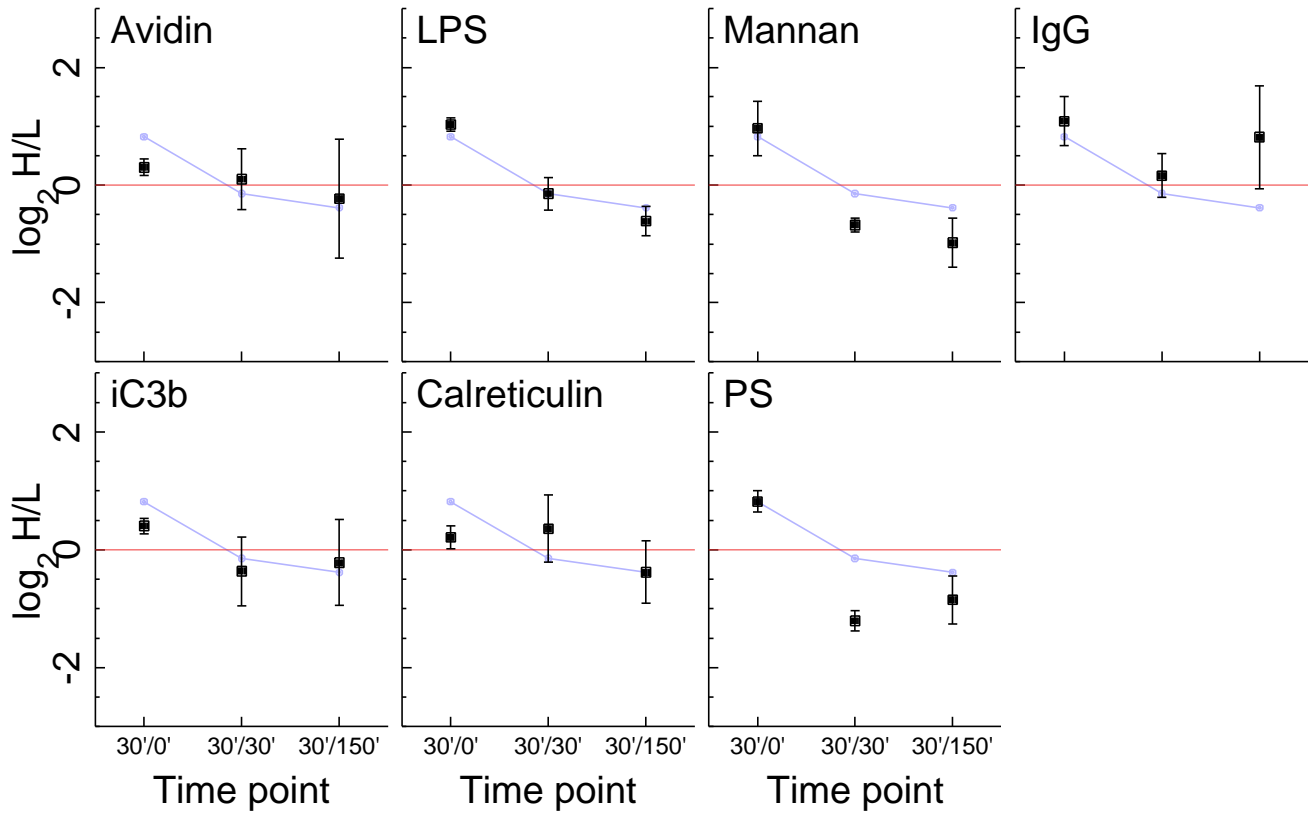

cdc42bpb (Q7TT50)

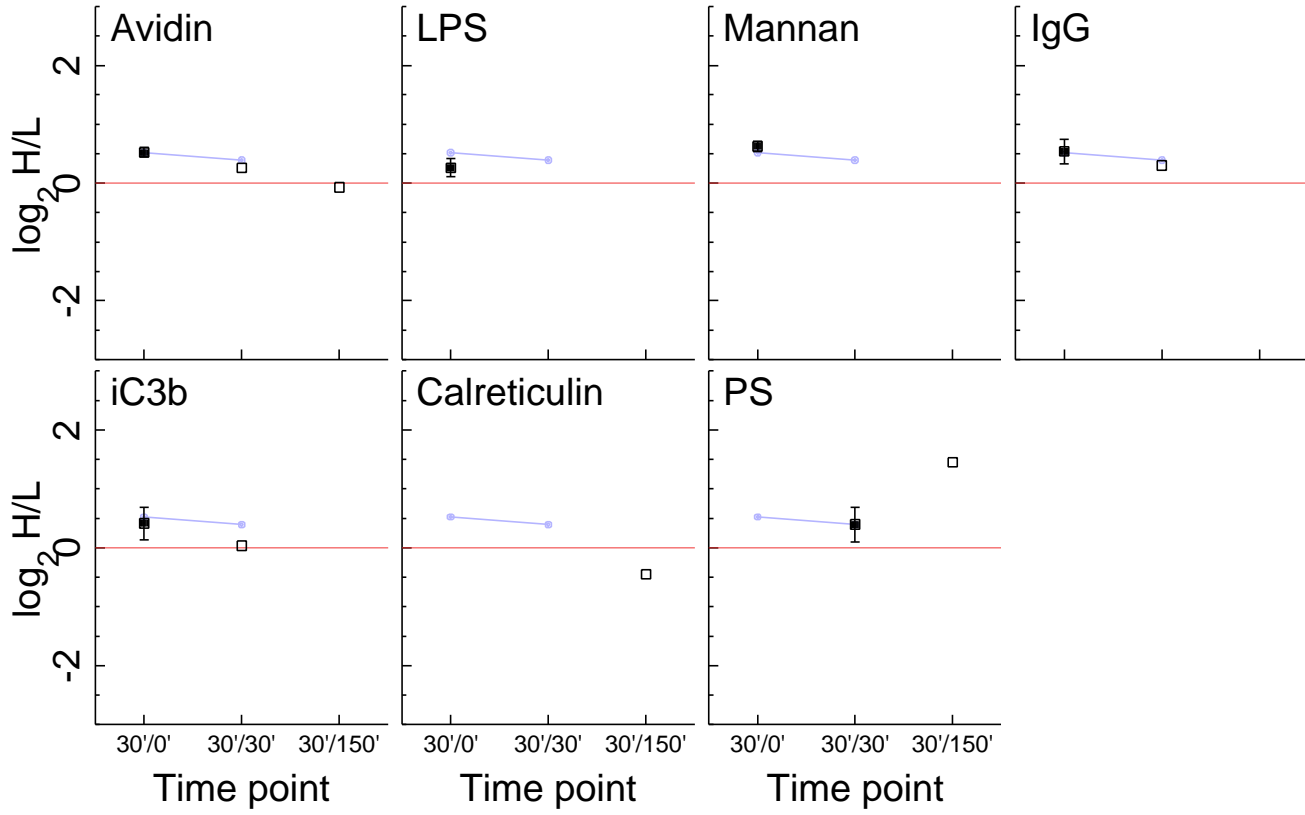

cdc42ep4 (Q9JM96)

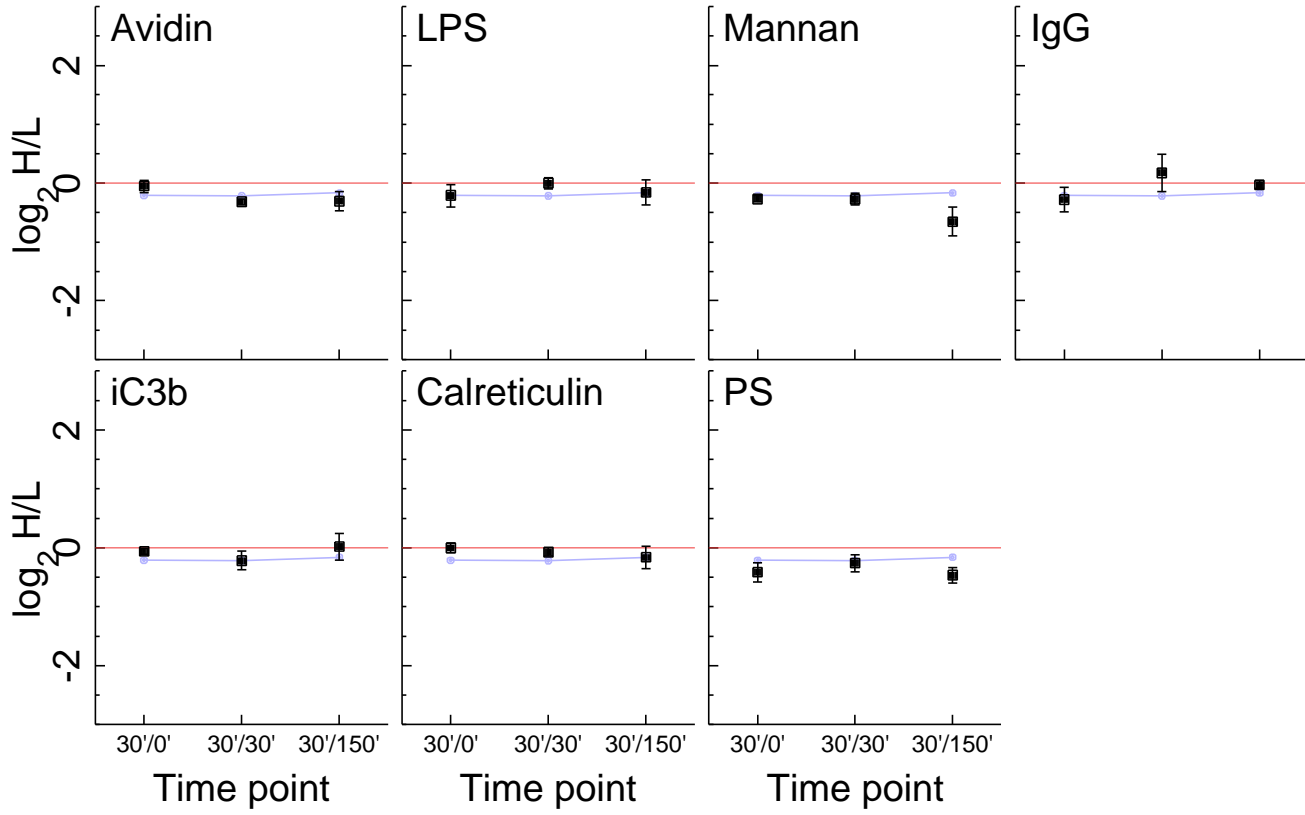

cdc42 (P60766)

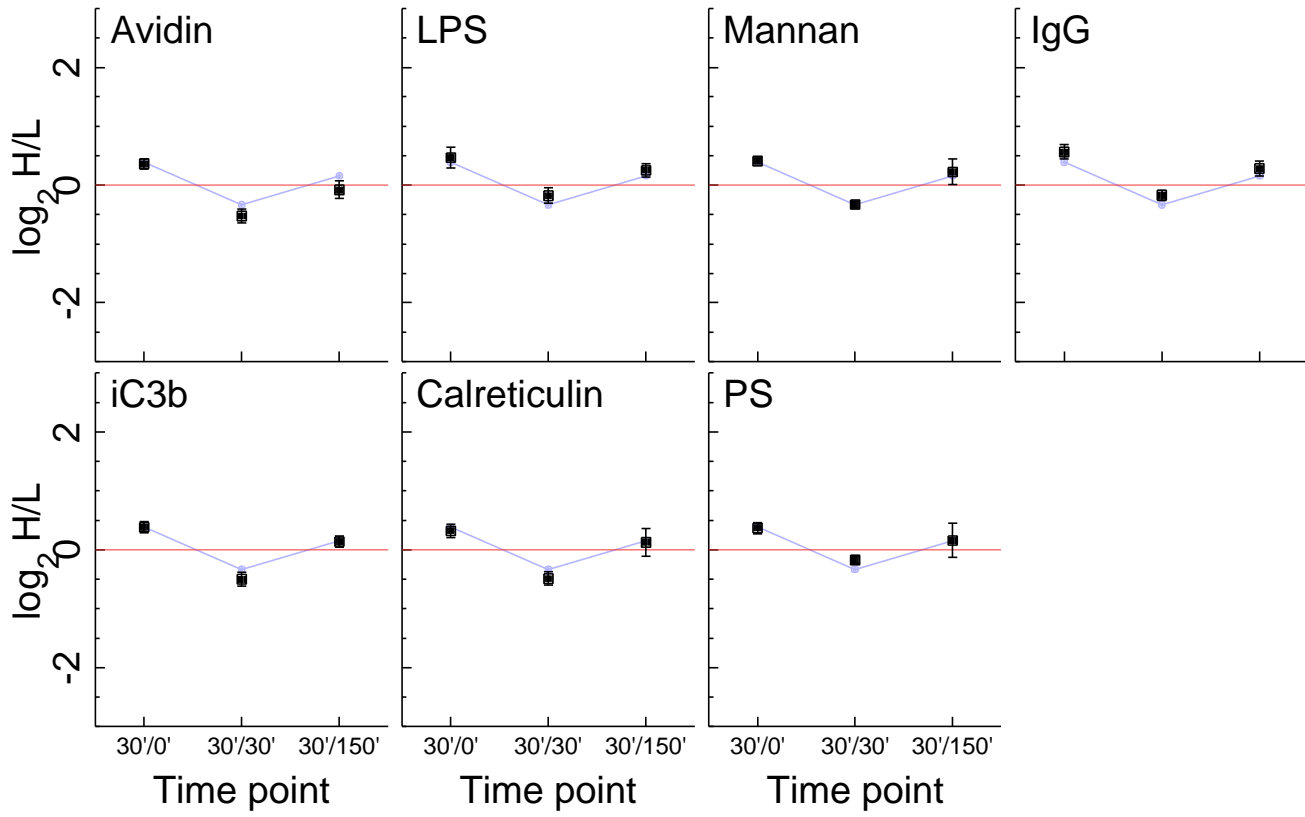

### cdca3 (Q99M54)

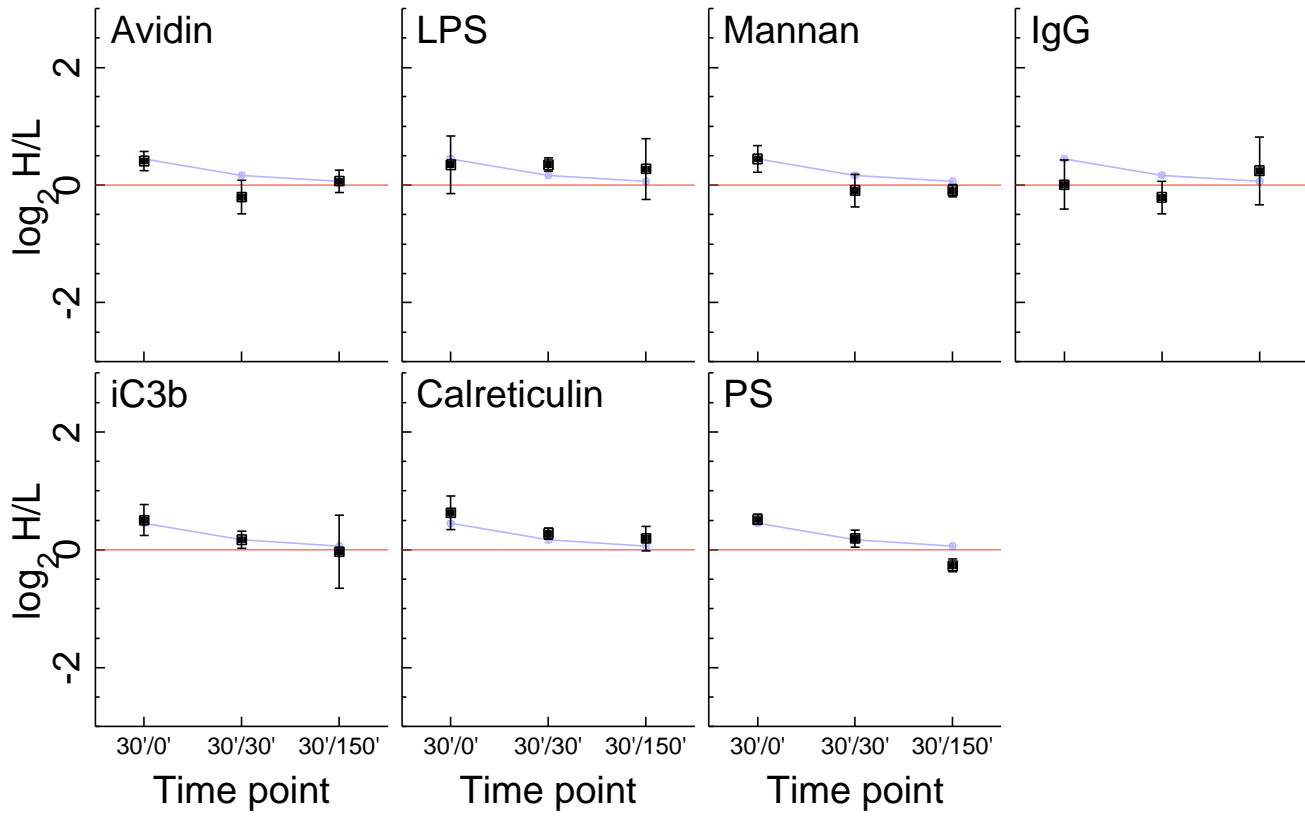



cdipt (Q8VDP6)

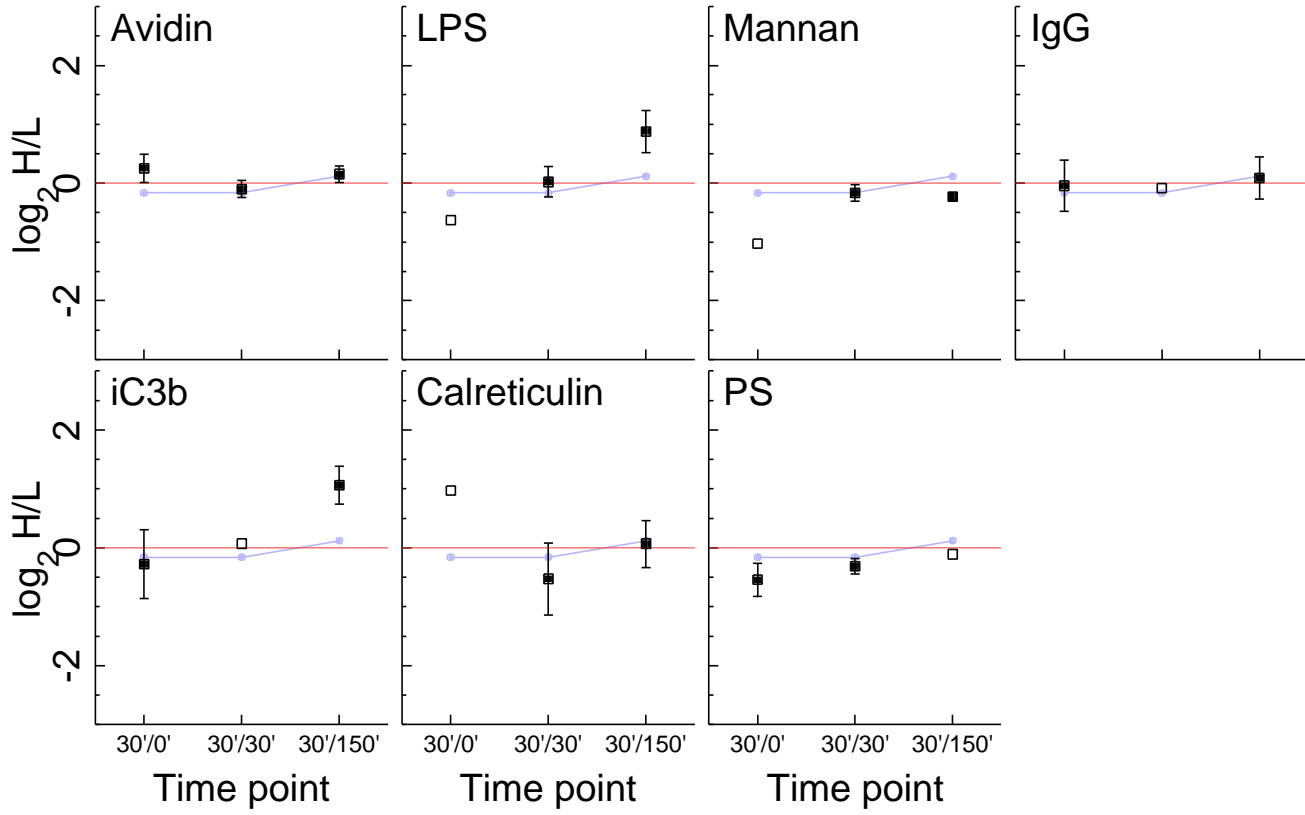

cdk14 (O35495)

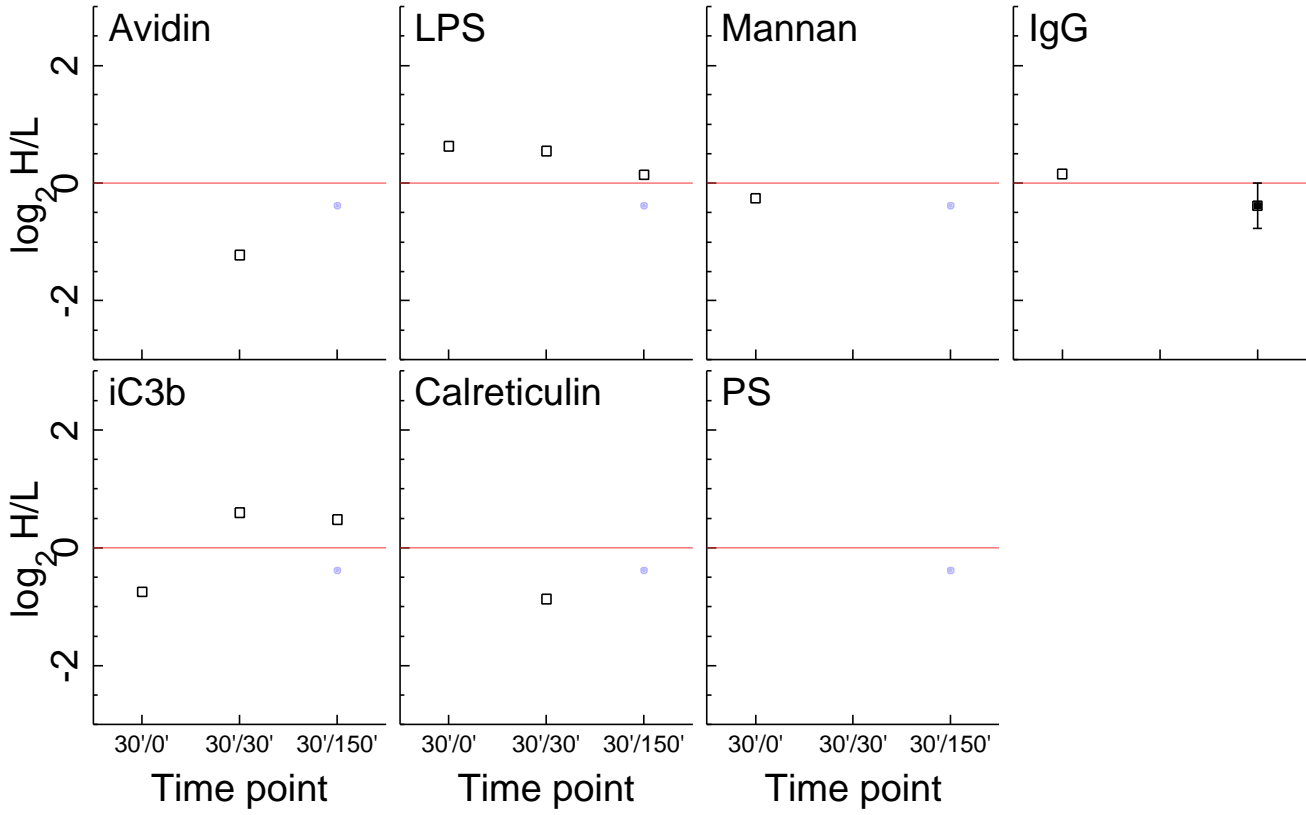

cdk18 (Q04899)

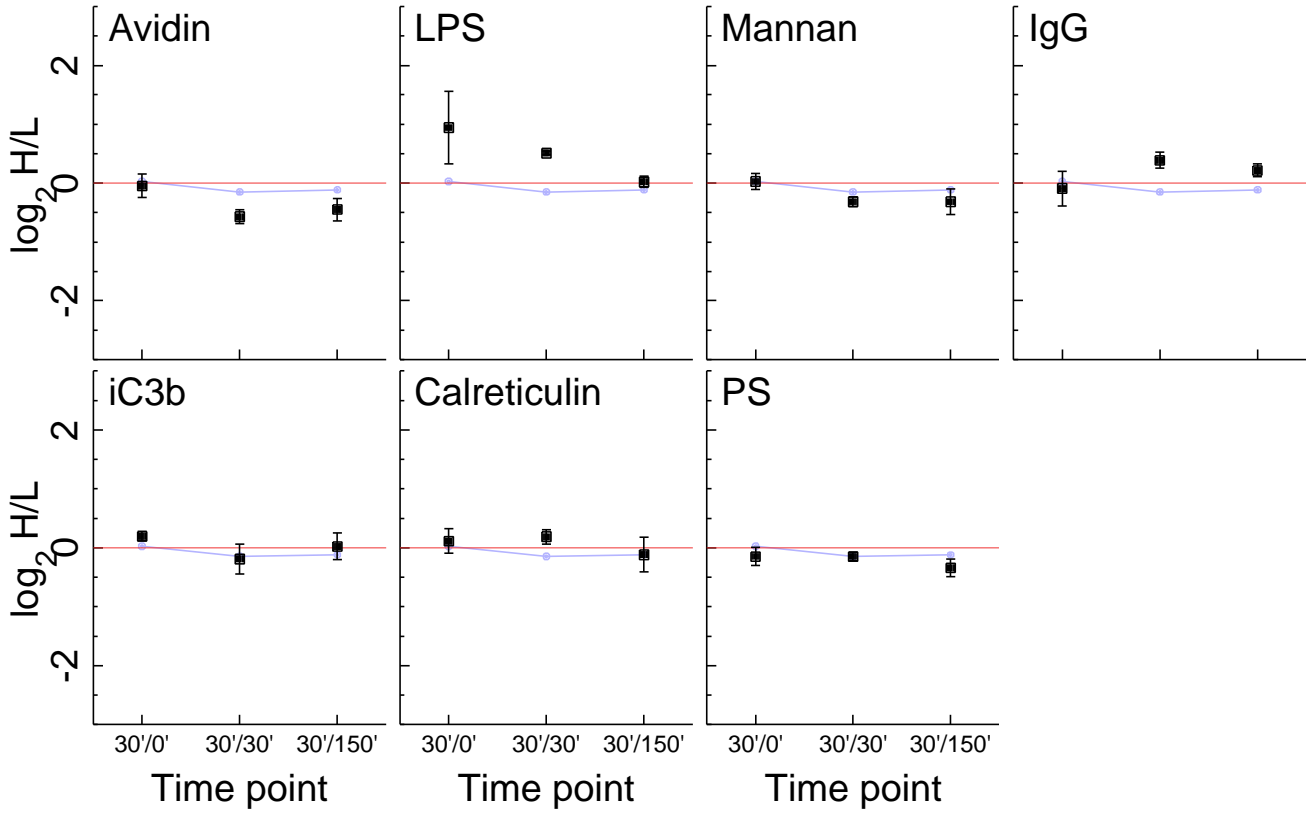

### cdk1 (P11440)

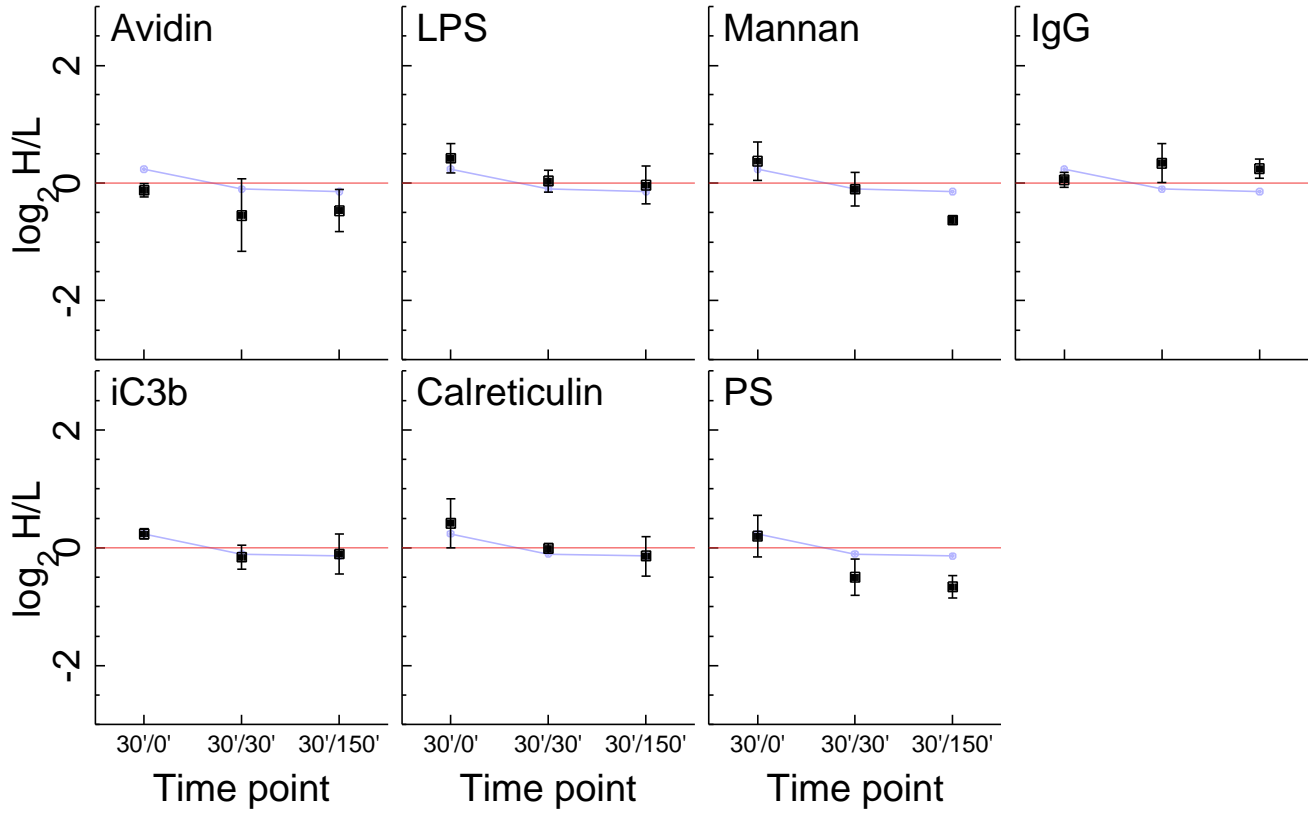

cdk2 (P97377)

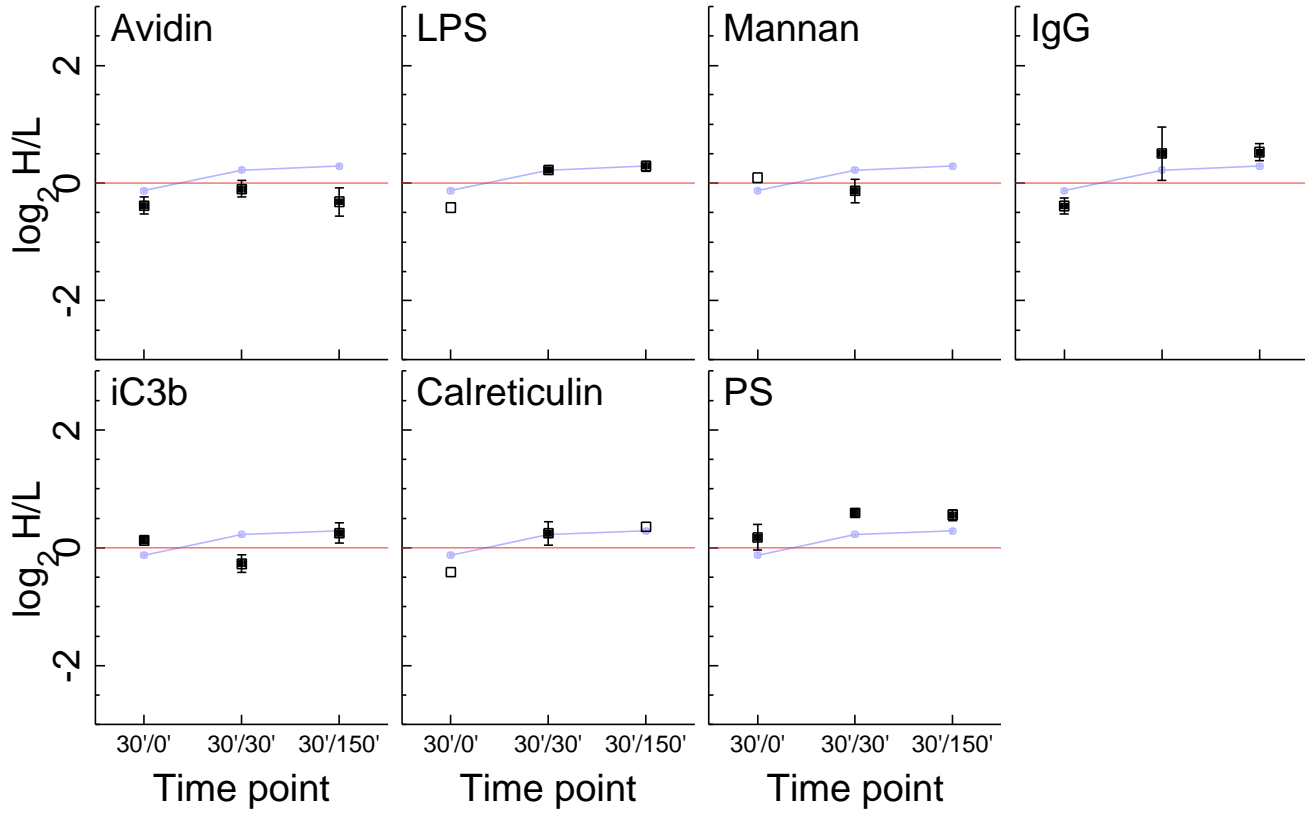

cdk5 (P49615)

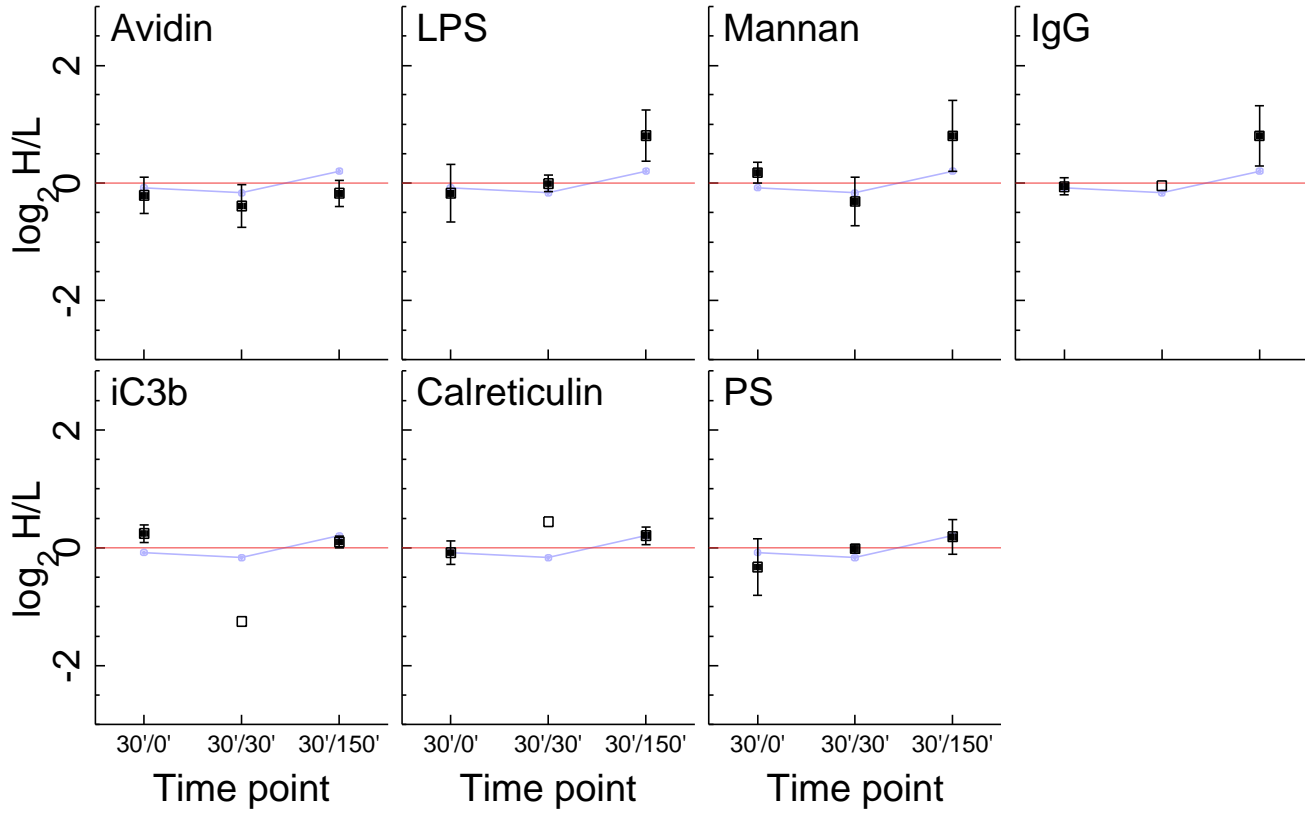

cdkn1b (P46414)

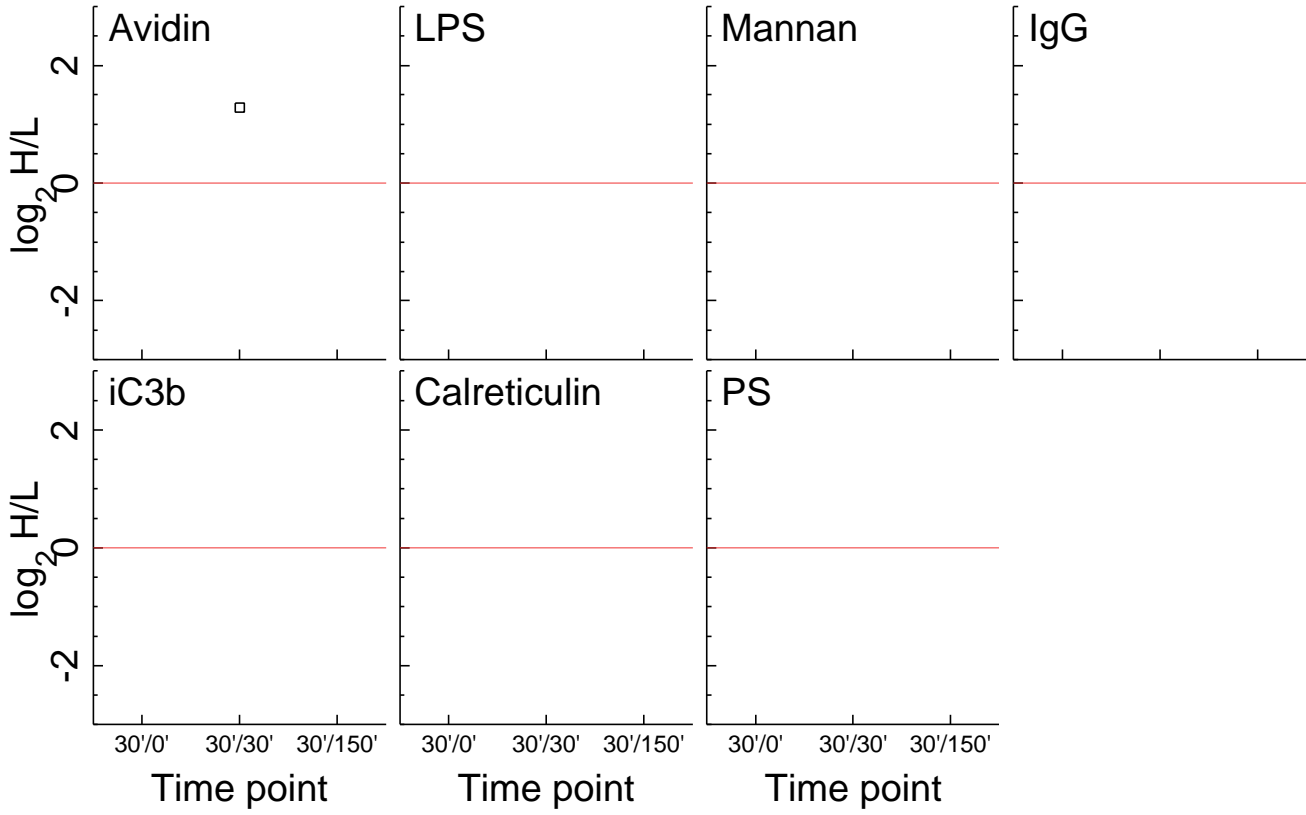

cds2 (Q99L43)

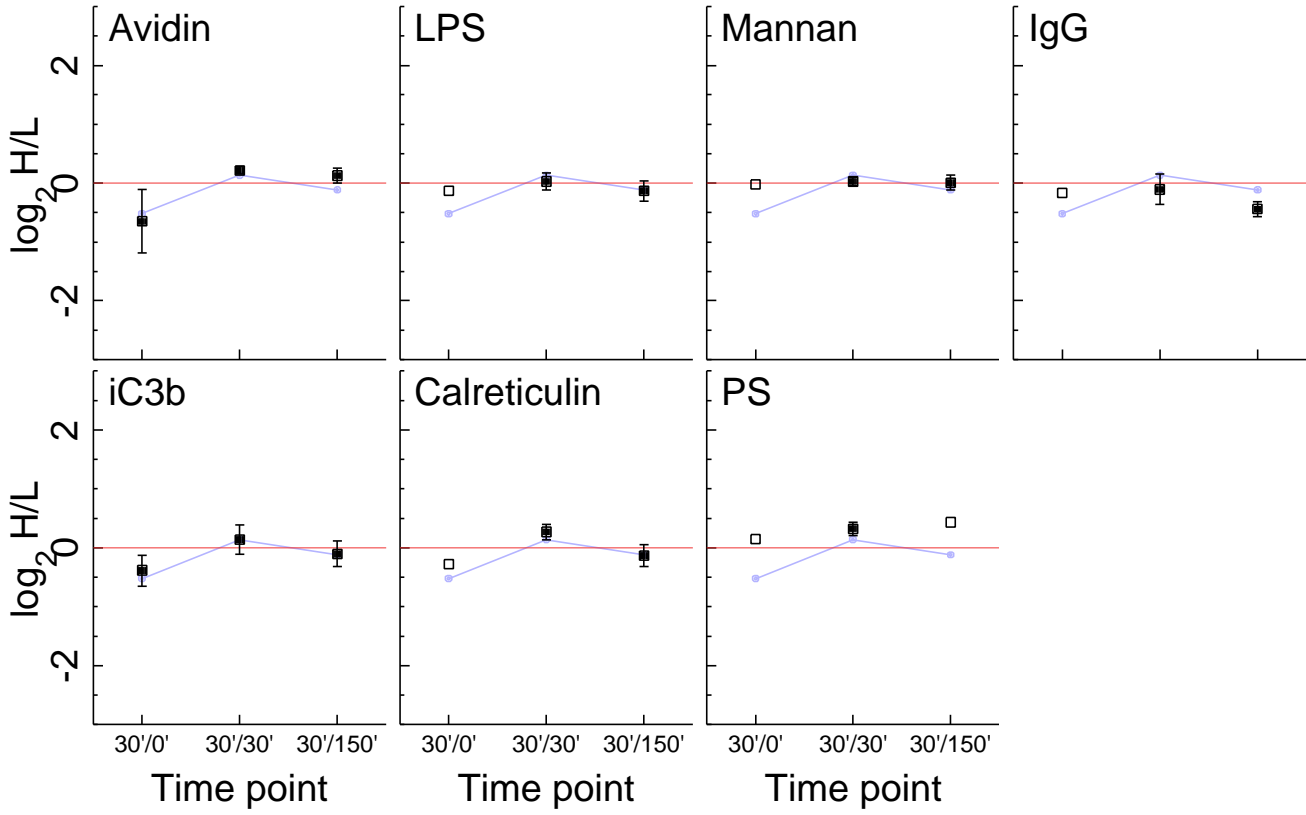



cenpe (Q6RT24)

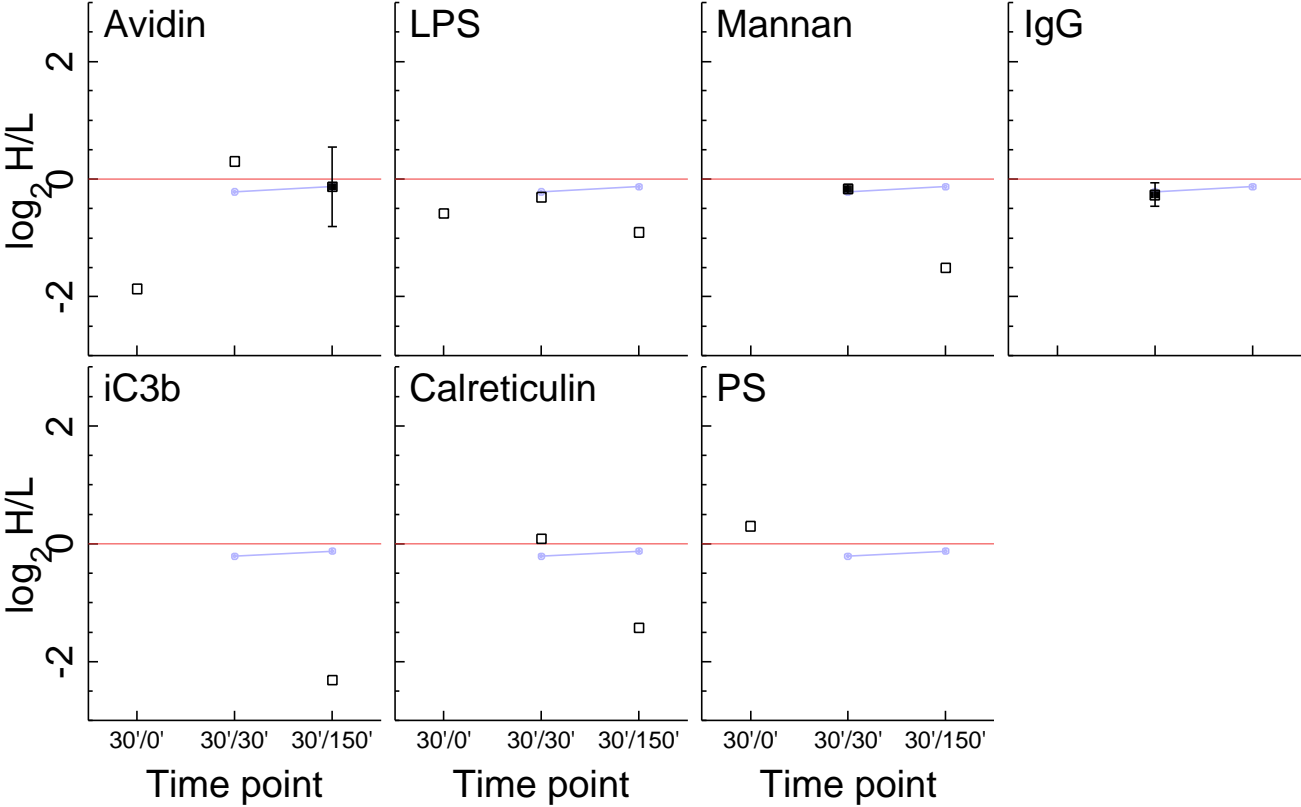

### cep41 (Q99NF3)

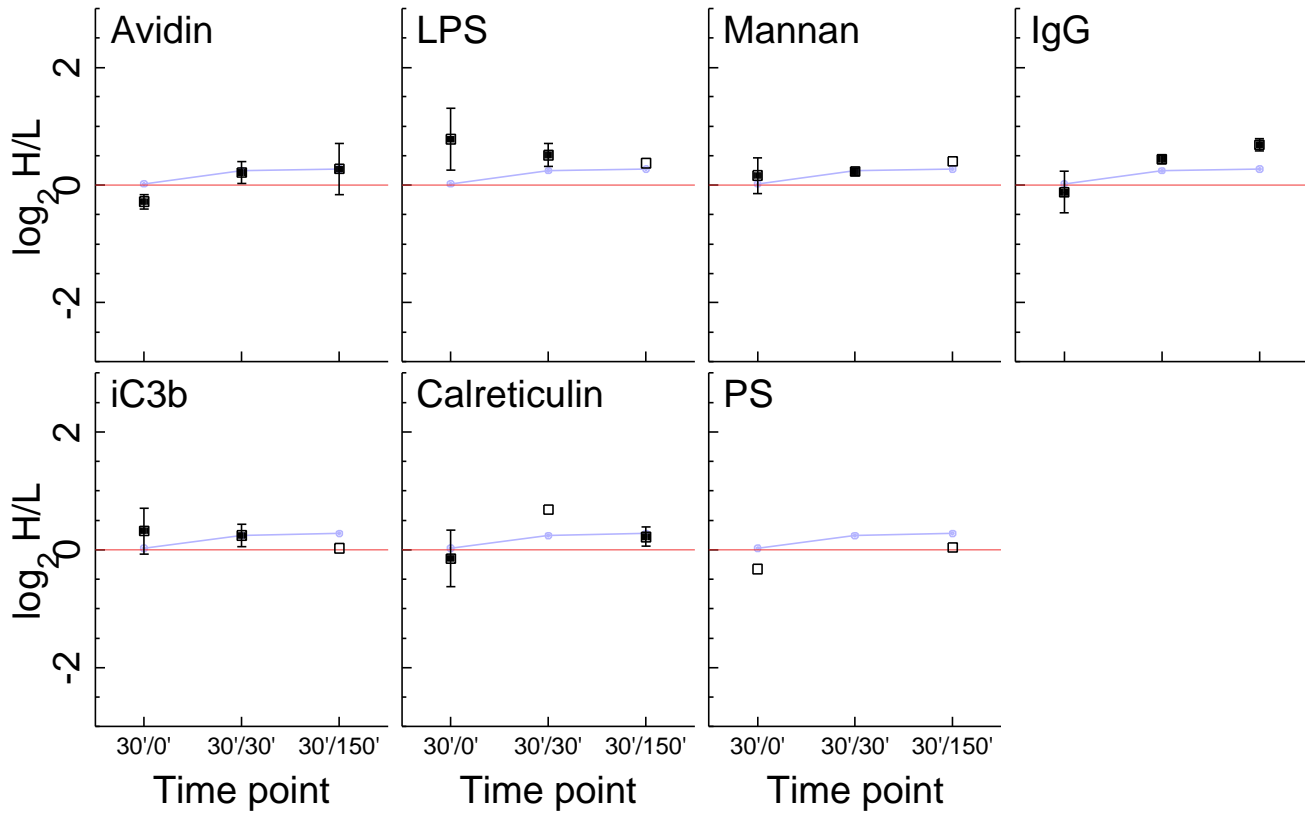

### cep55 (Q8BT07)

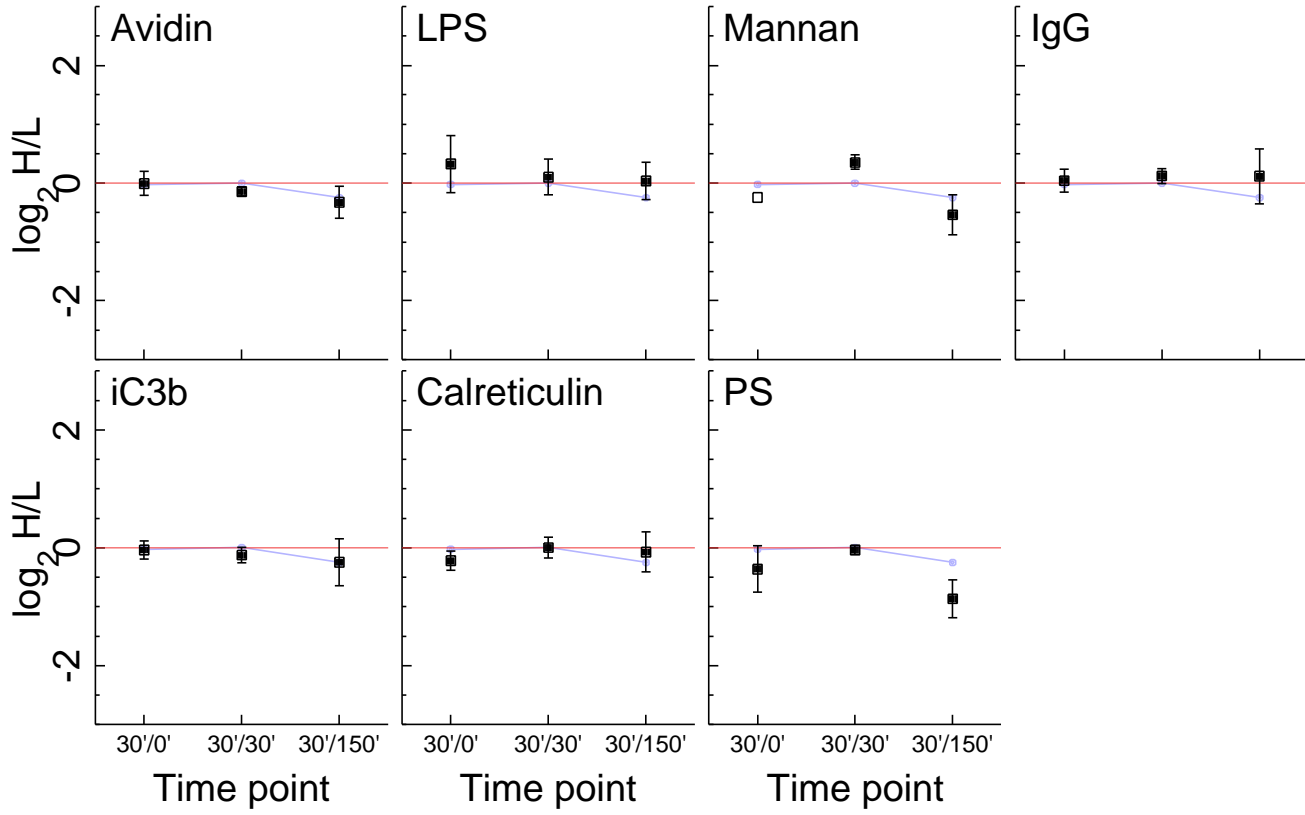

*cers2* (Q924Z4)

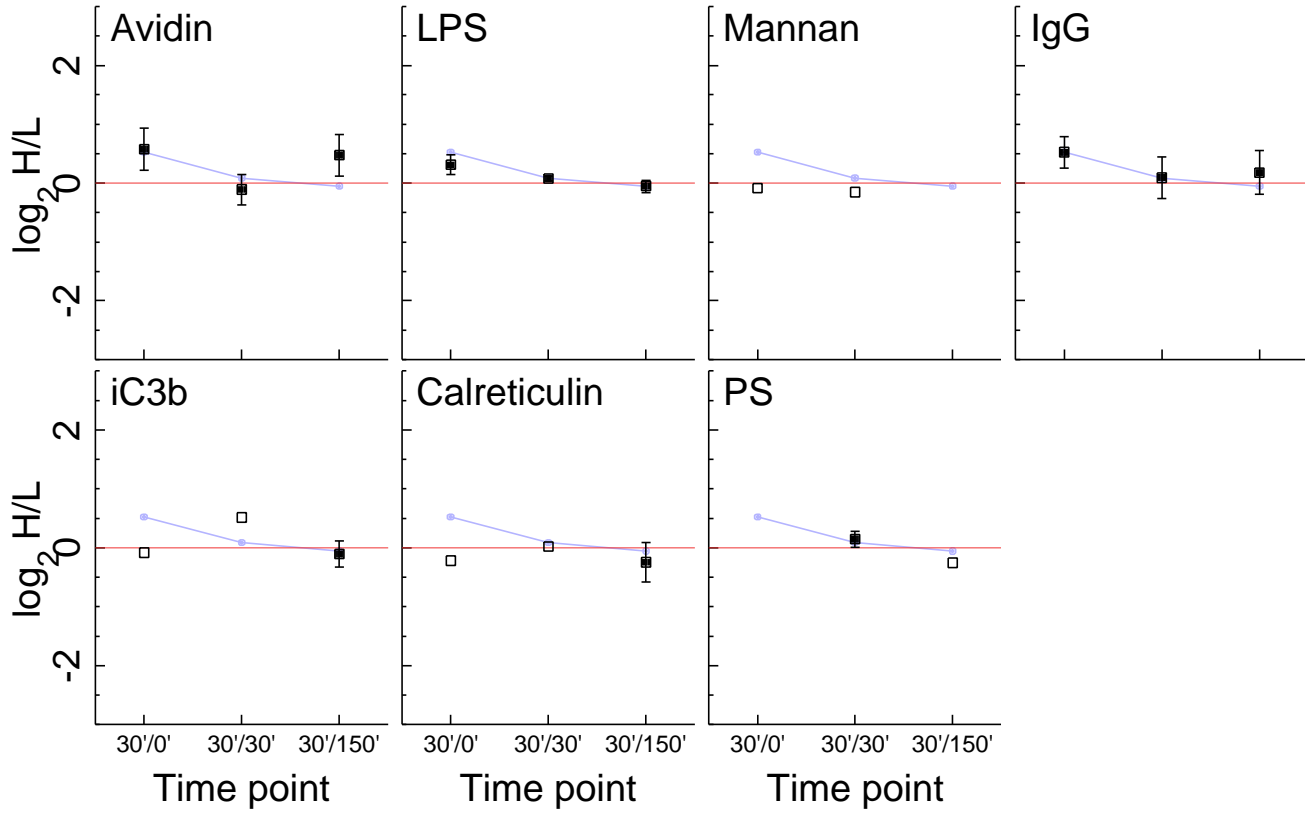

### cf11 (F8WGL3)

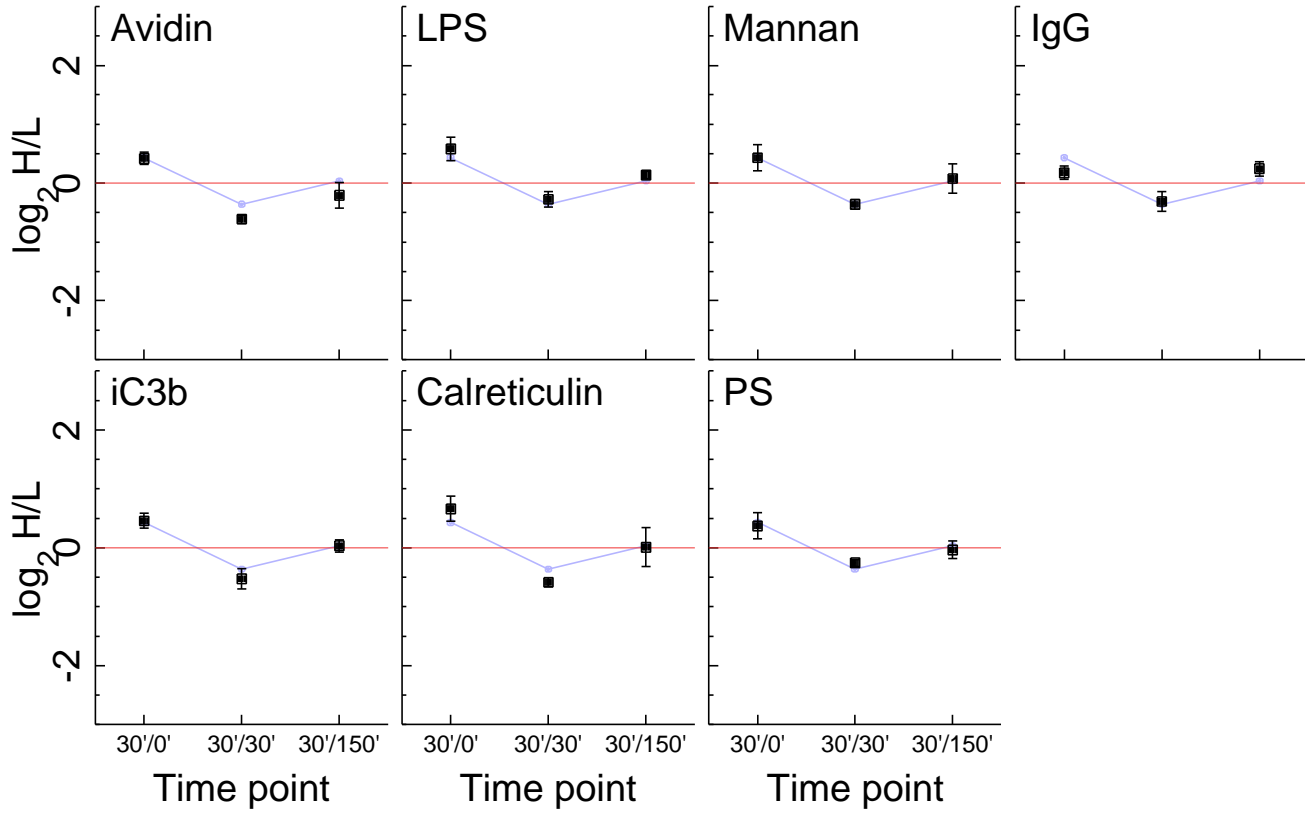

cfp (P11680)

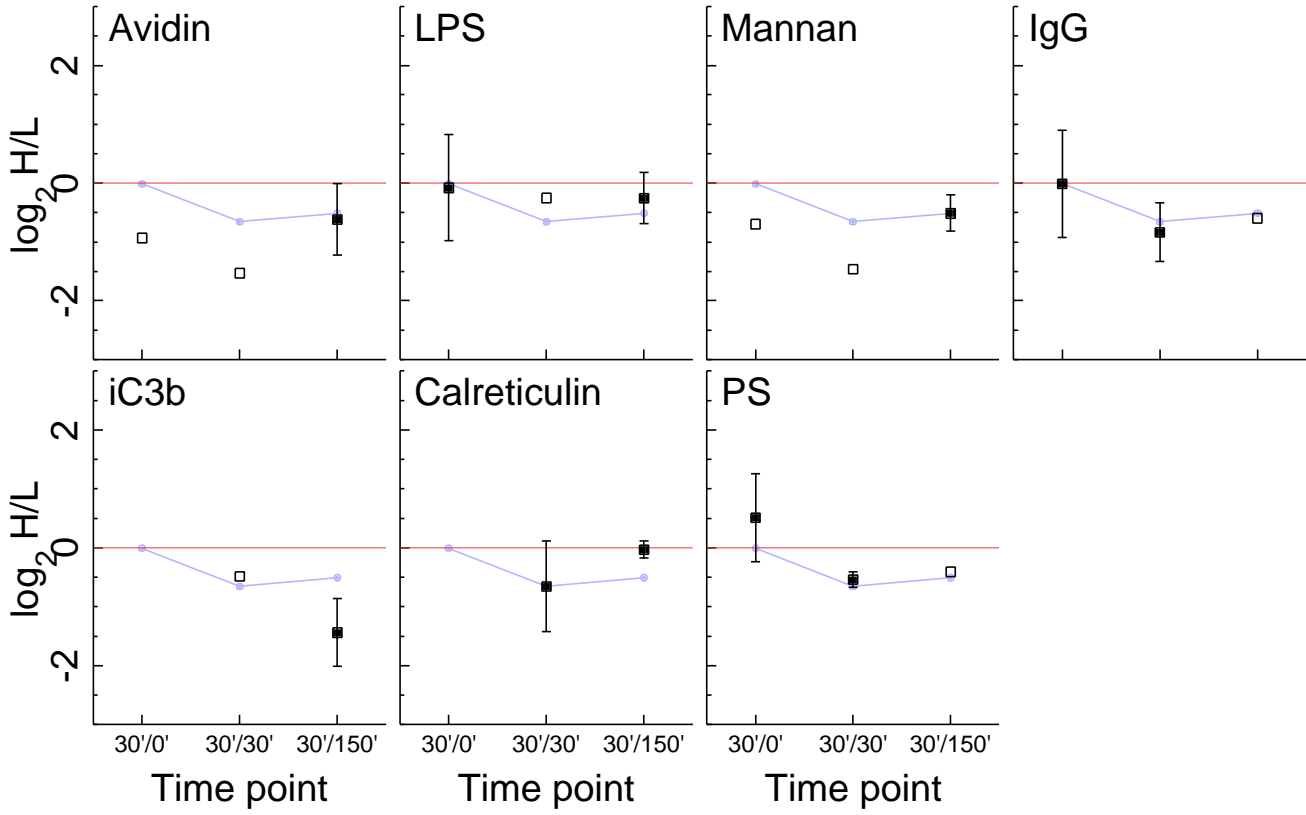

### chchd3 (Q9CRB9)

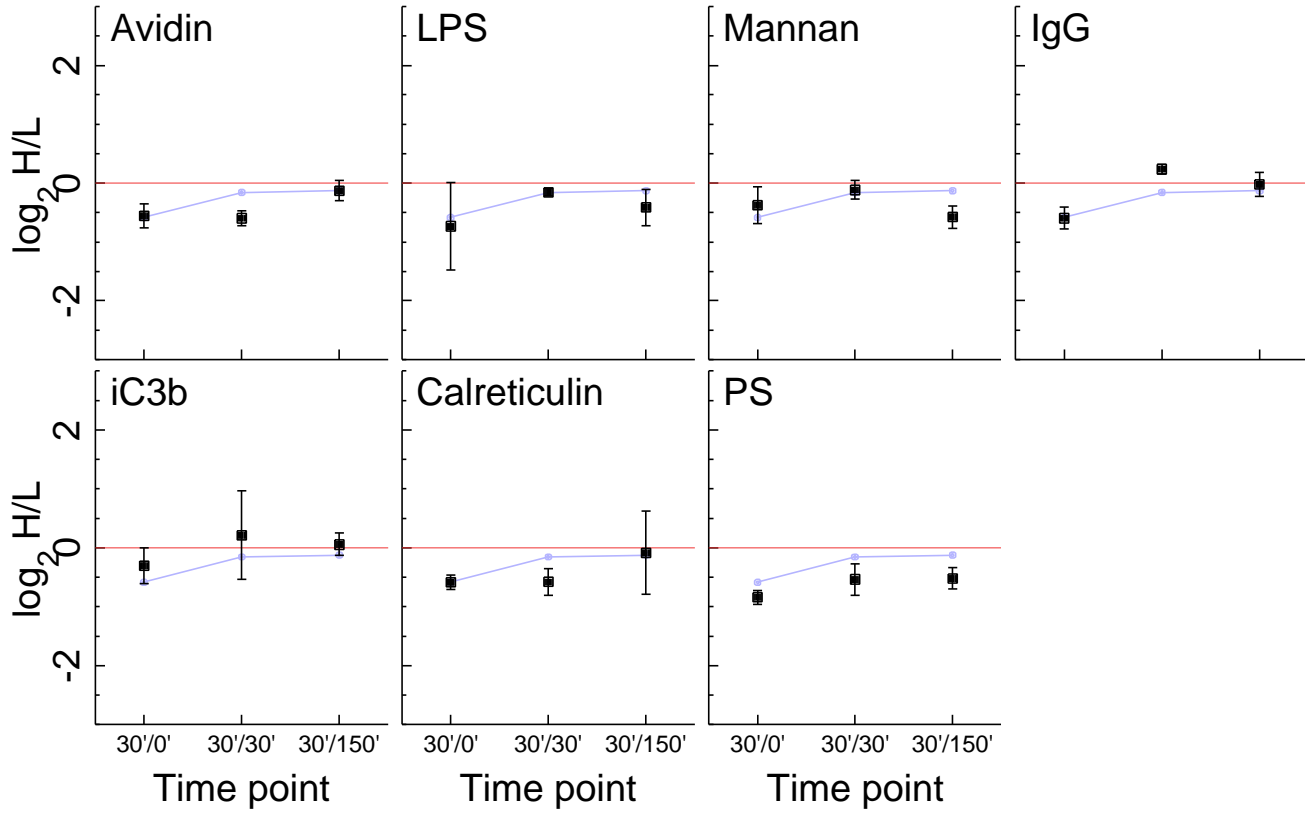

### chd4 (E9QAS5)

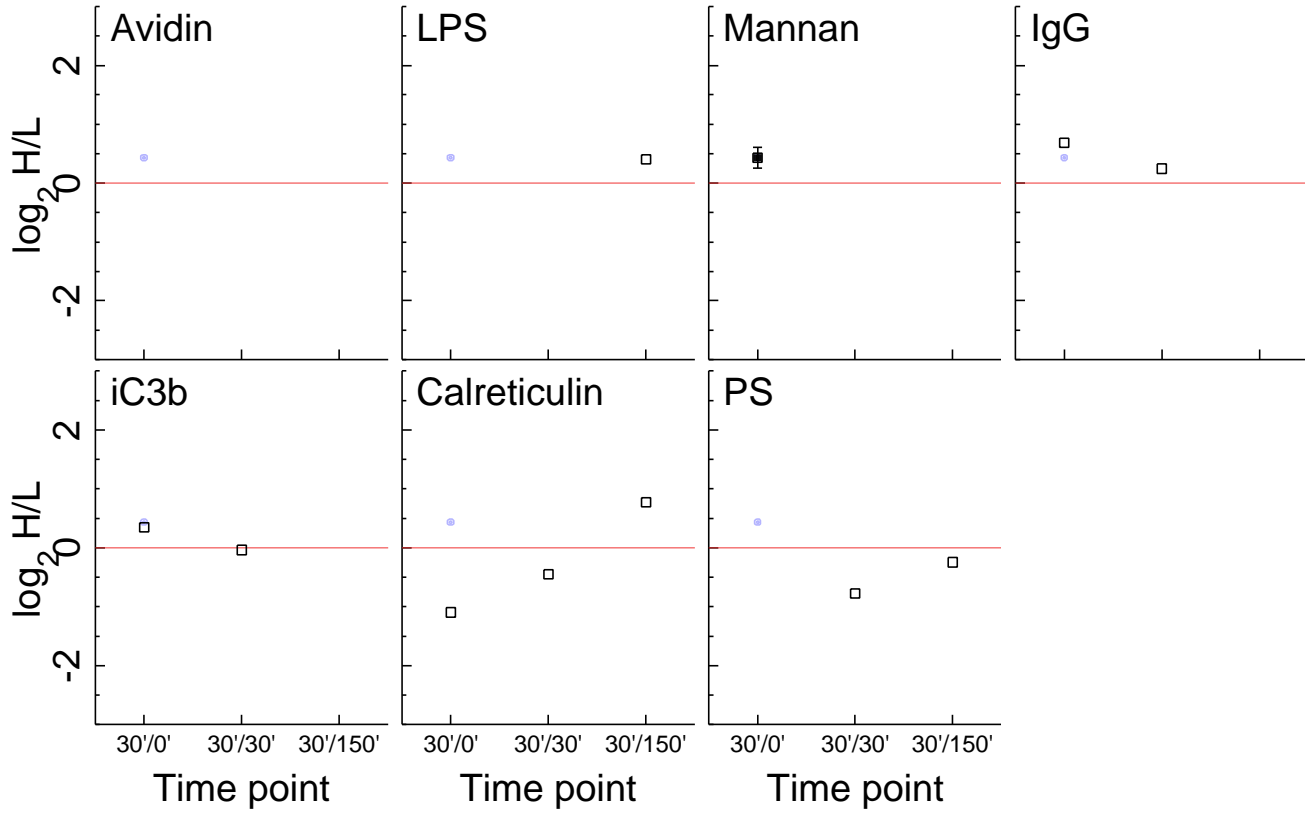



### chd6 (A3KFM7)

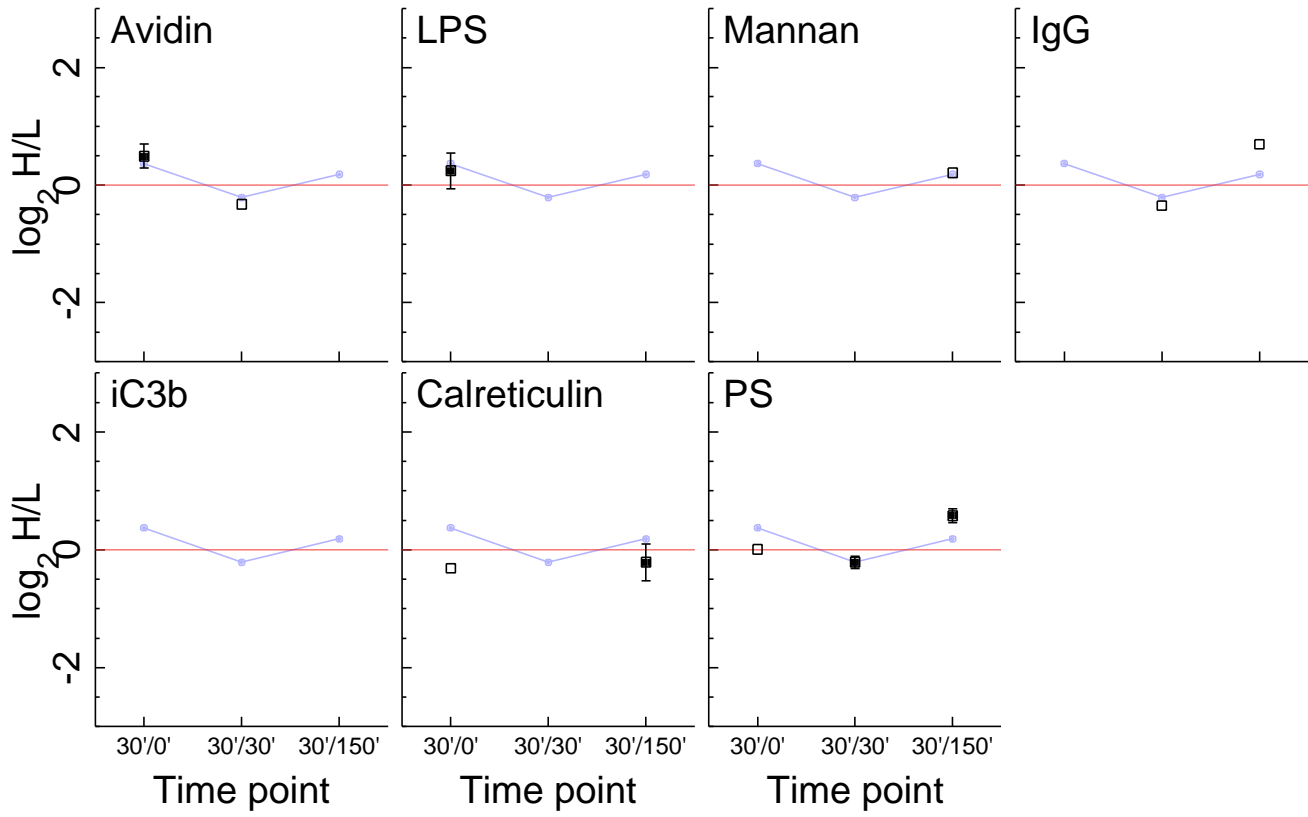

### chi3l3 (O35744)

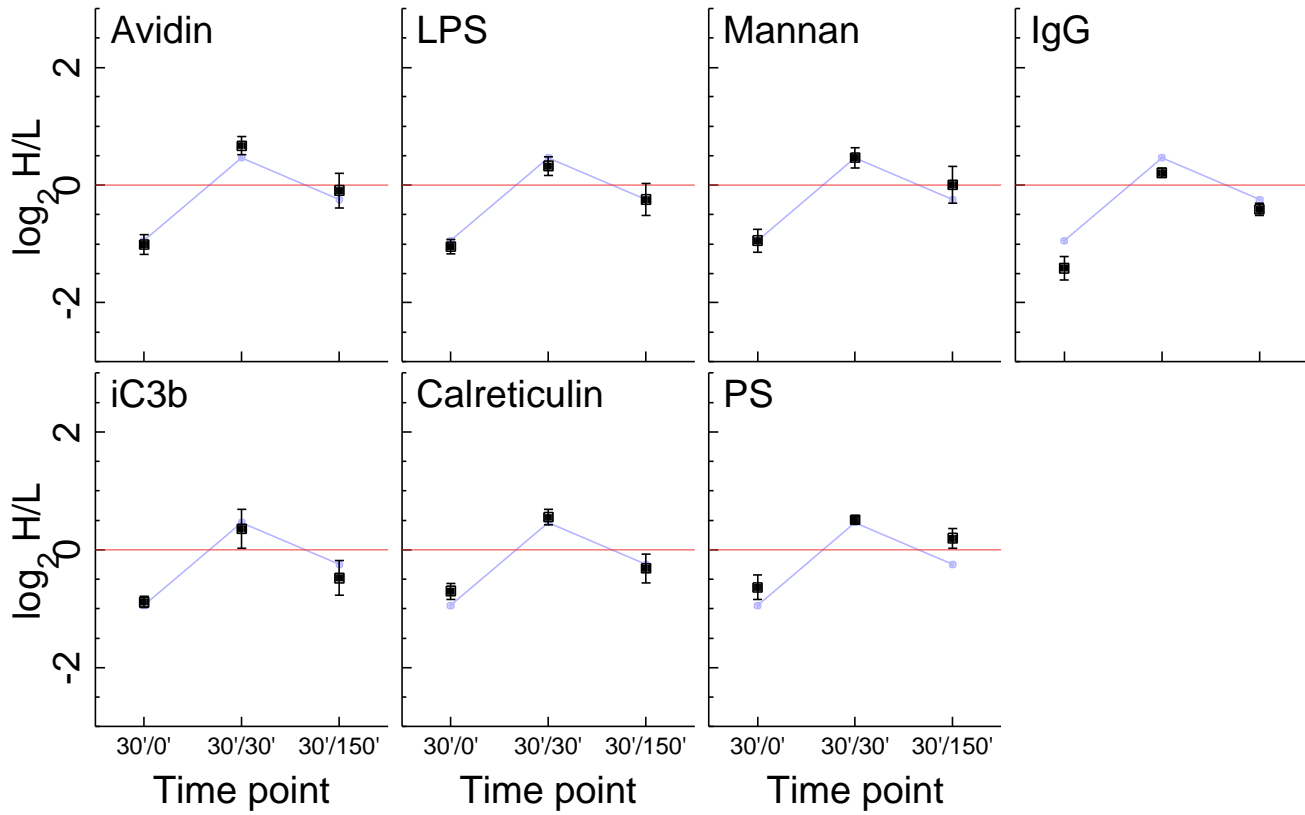

### chi3l4 (Q91Z98)

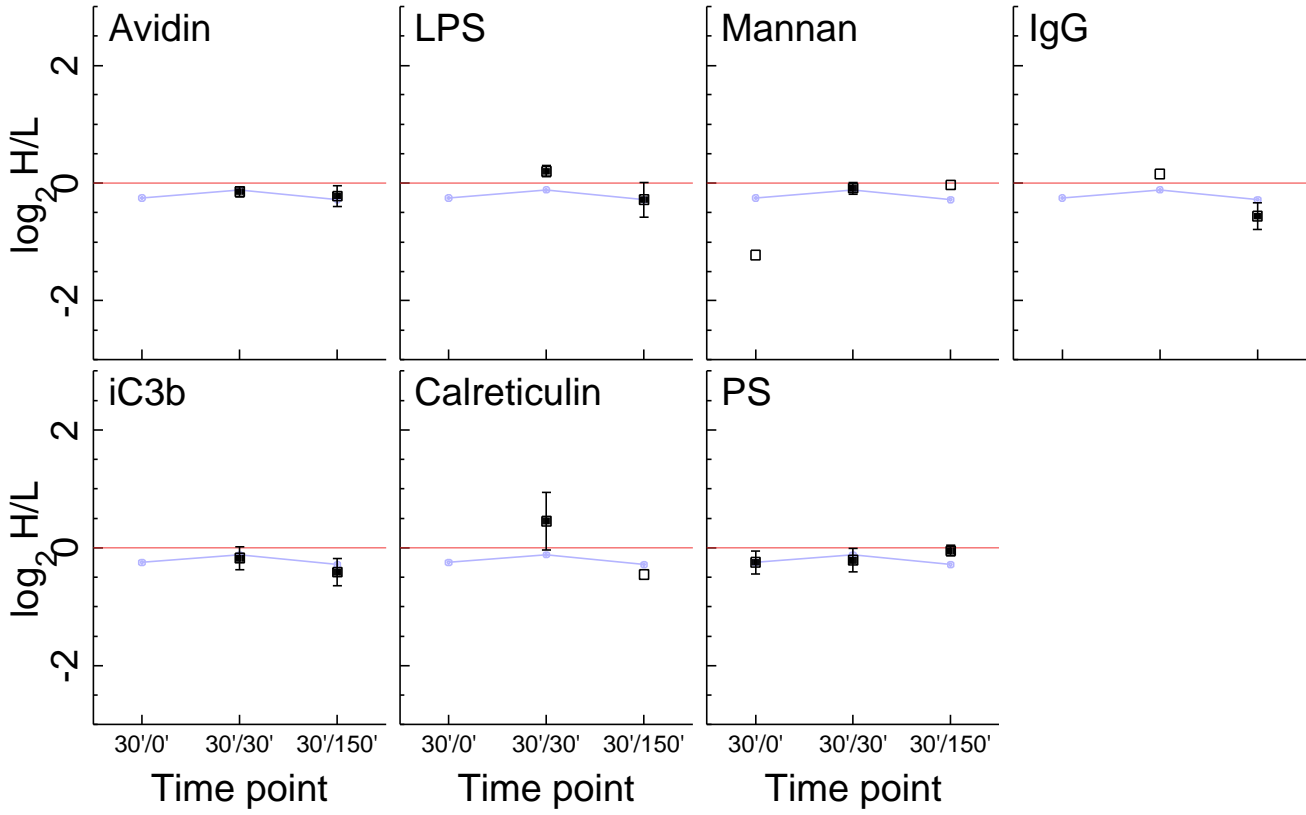

### chmp1a (Q921W0)

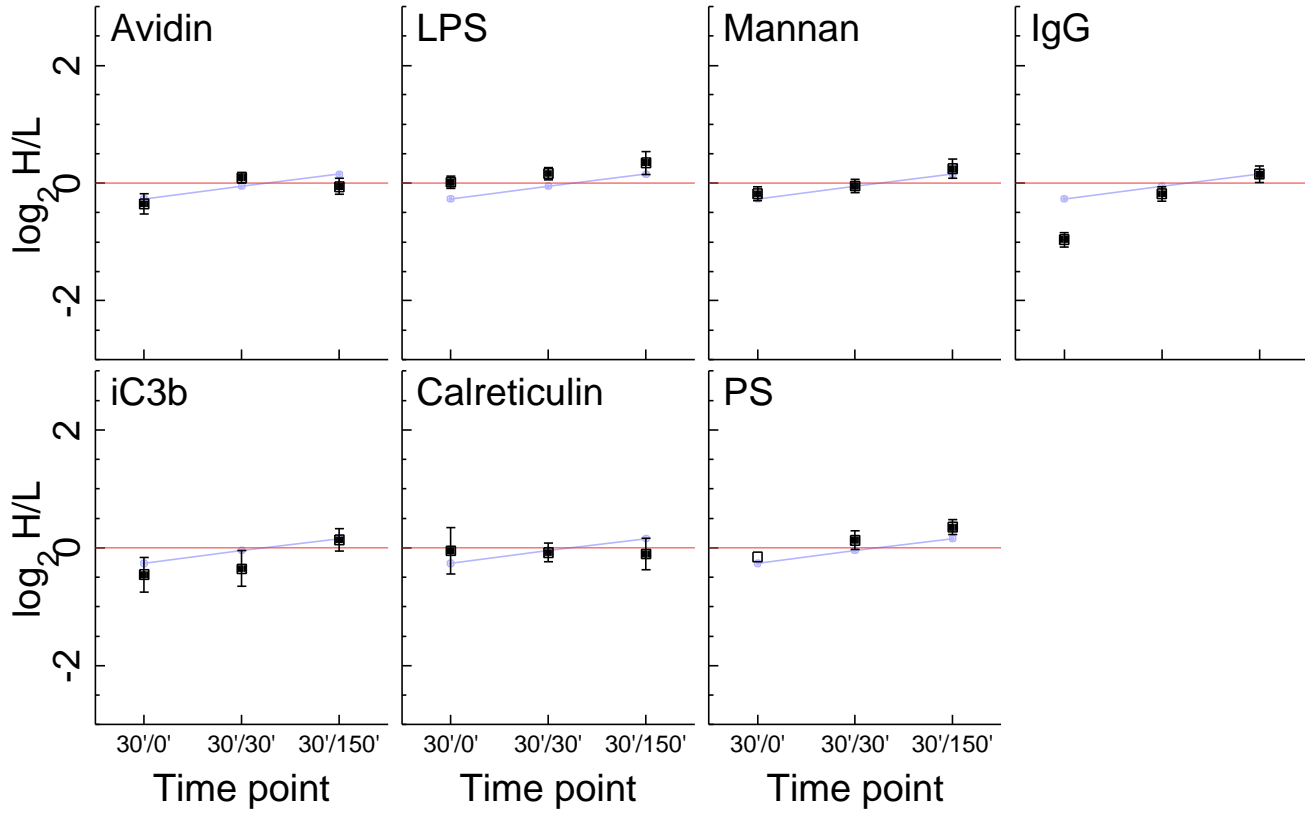

### chmp2a (Q9DB34)

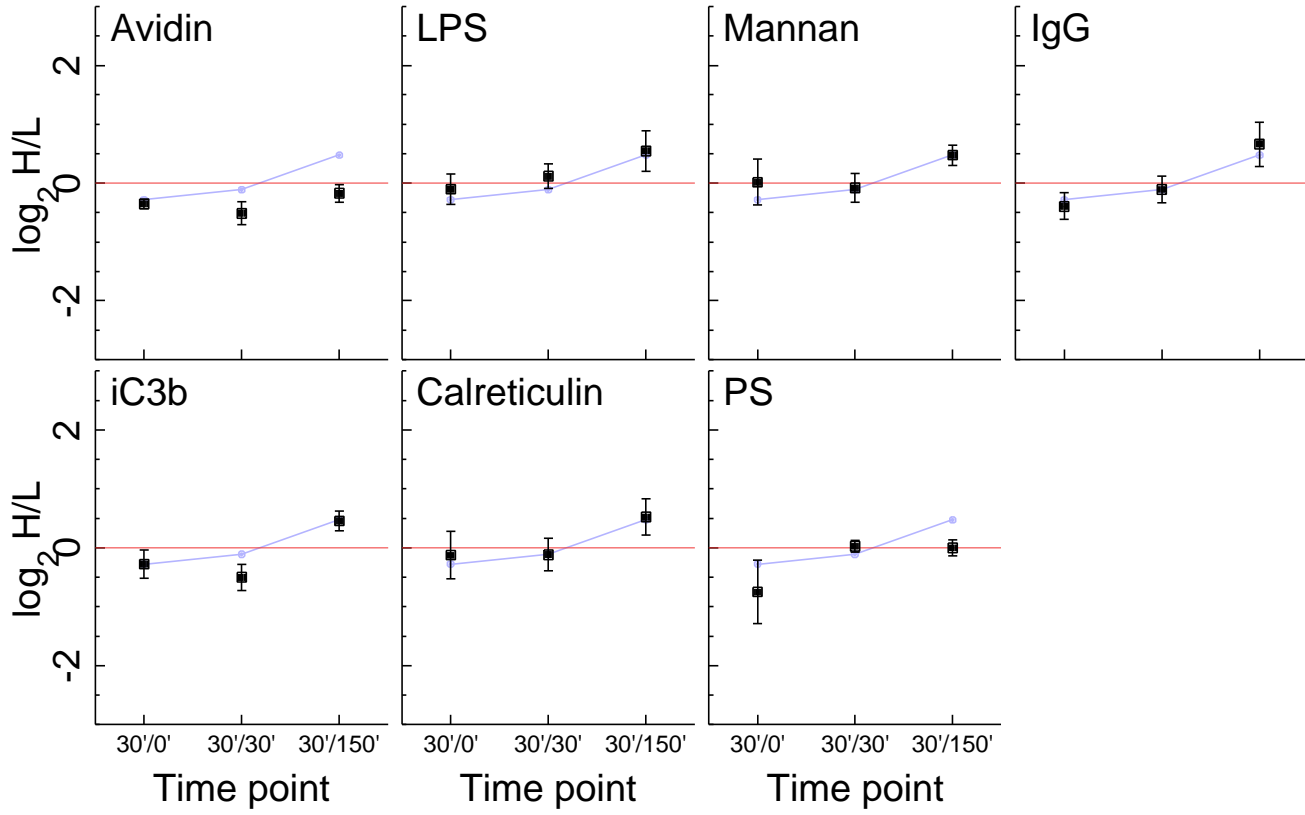

### chmp2b (Q8BJF9)

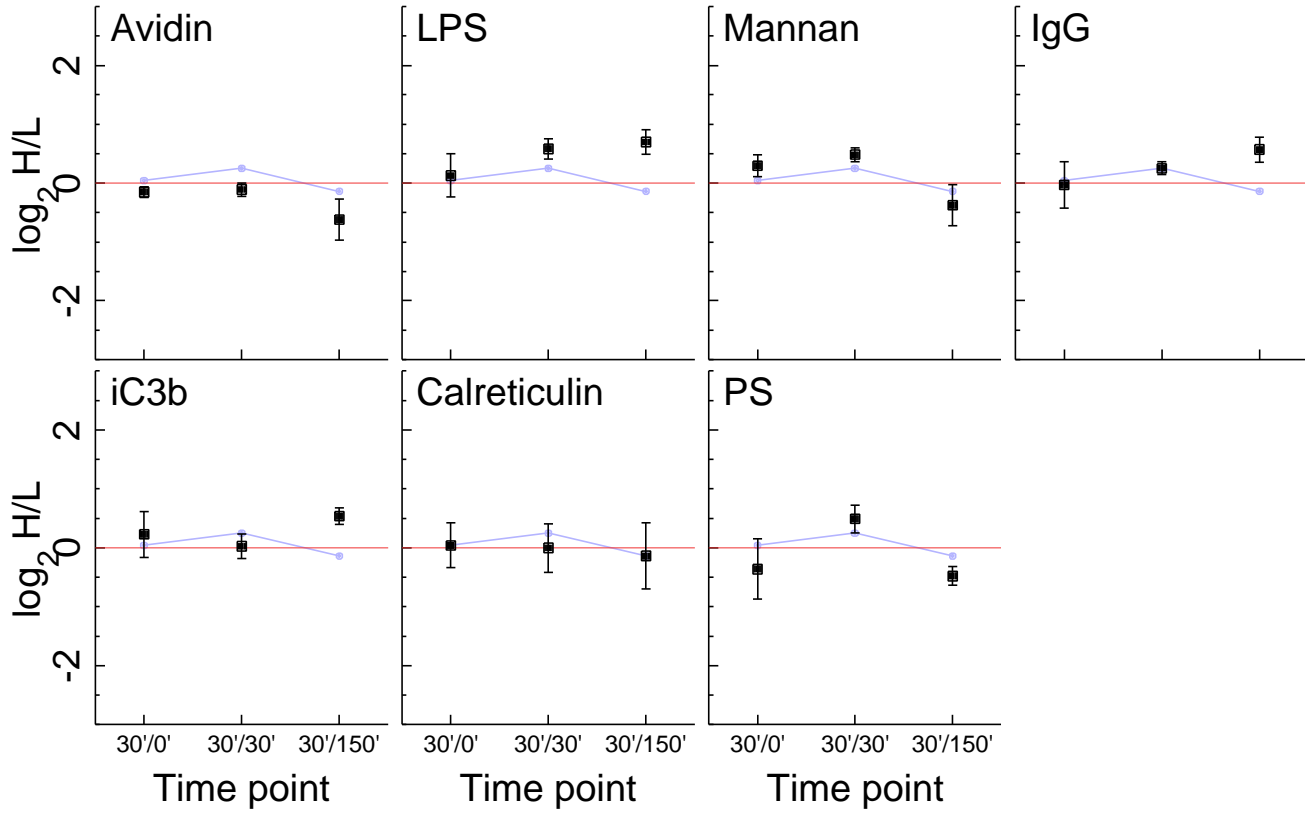

### chmp4b (Q9D8B3)

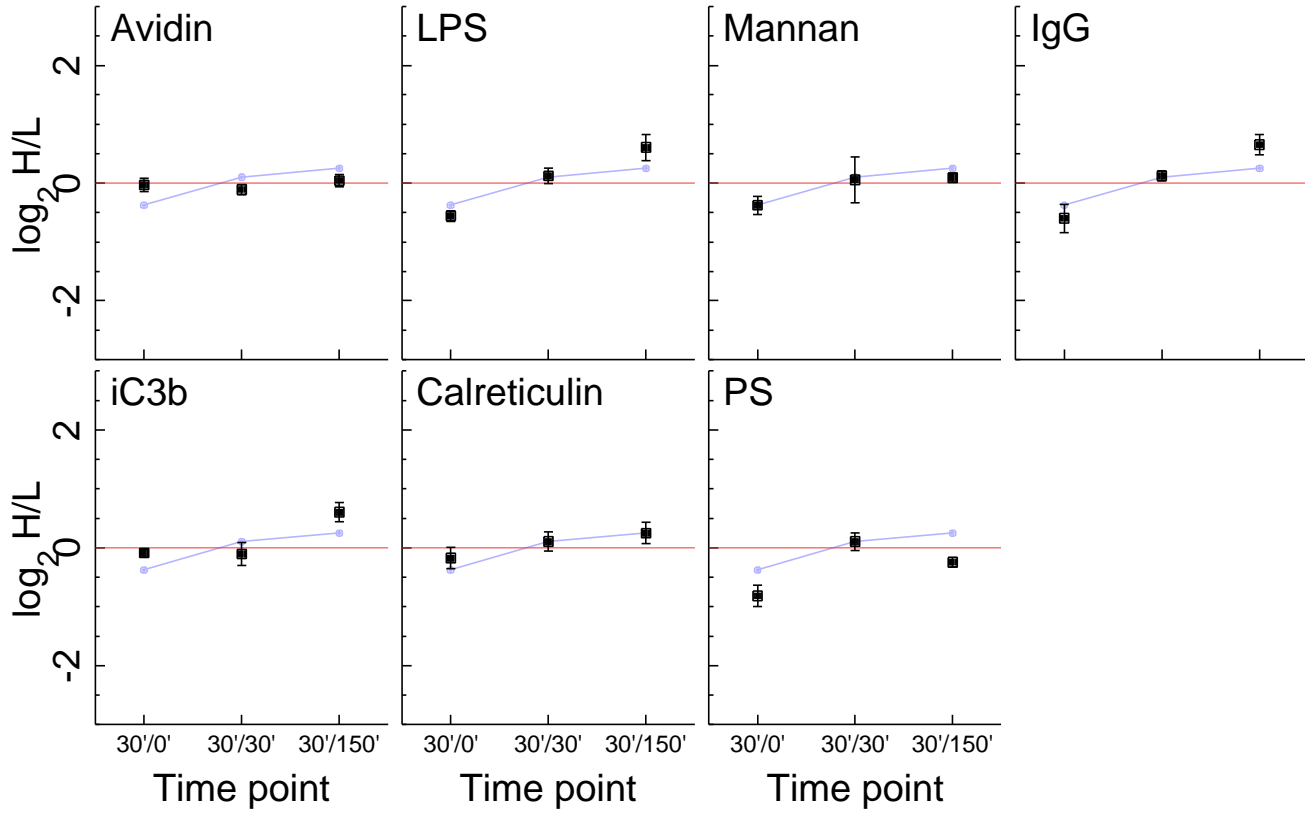

### chmp5 (Q9D7S9)

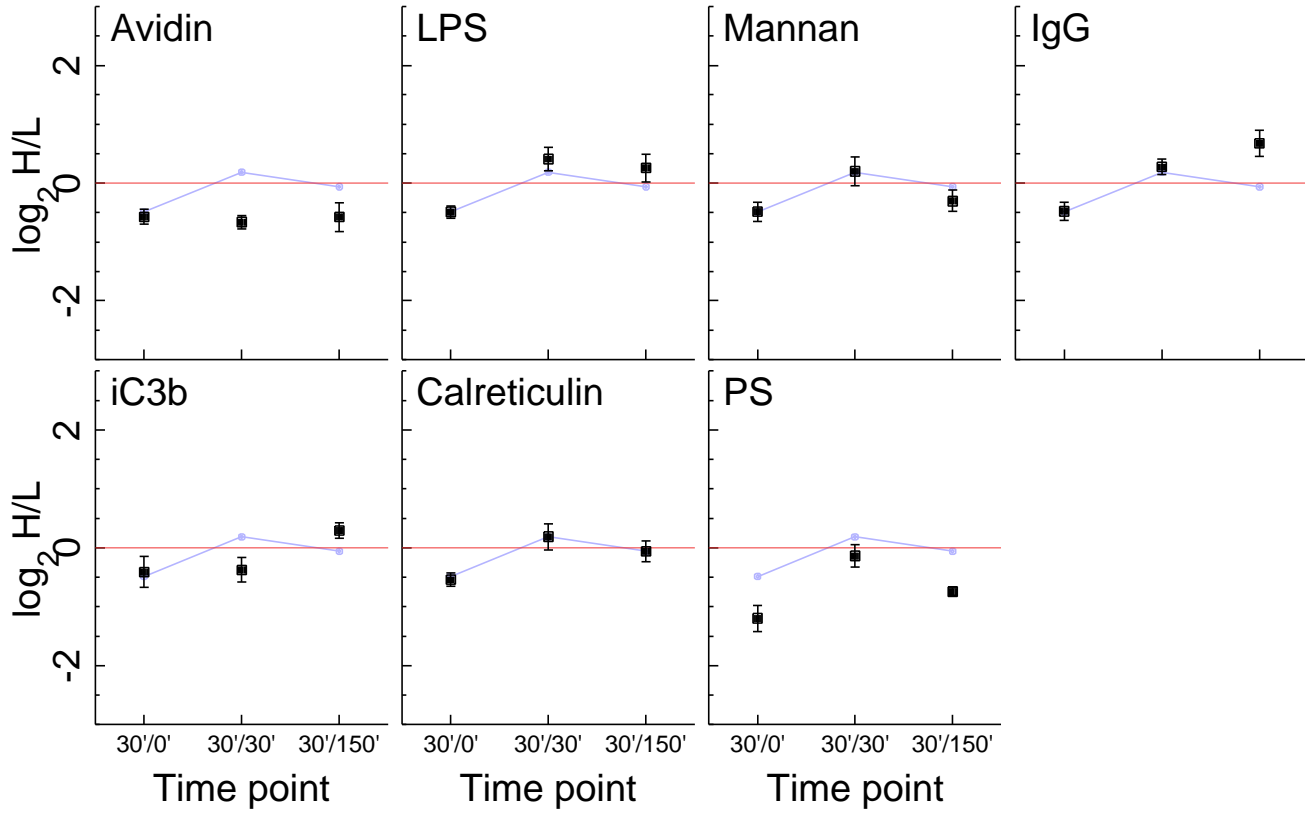



chmp6 (P0C0A3)

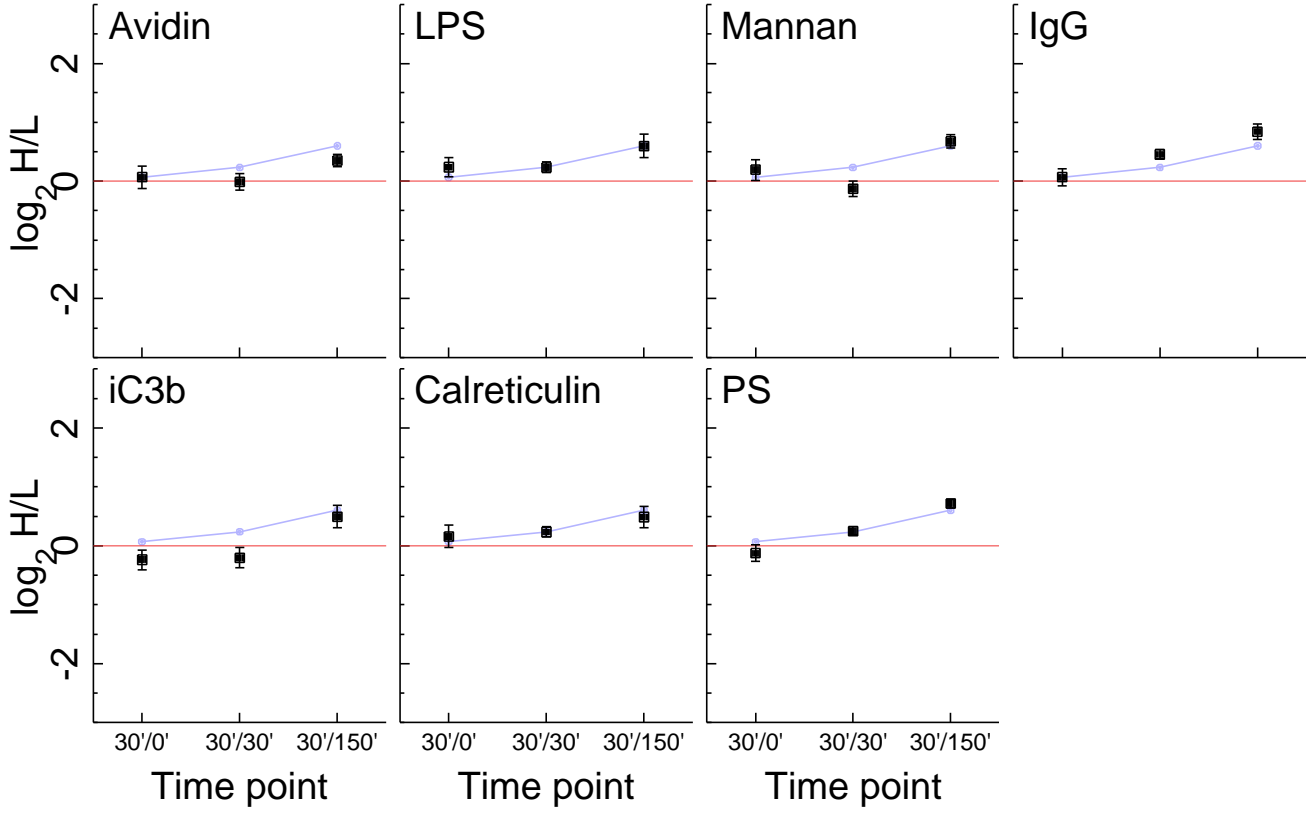

cisd1 (Q91WS0)

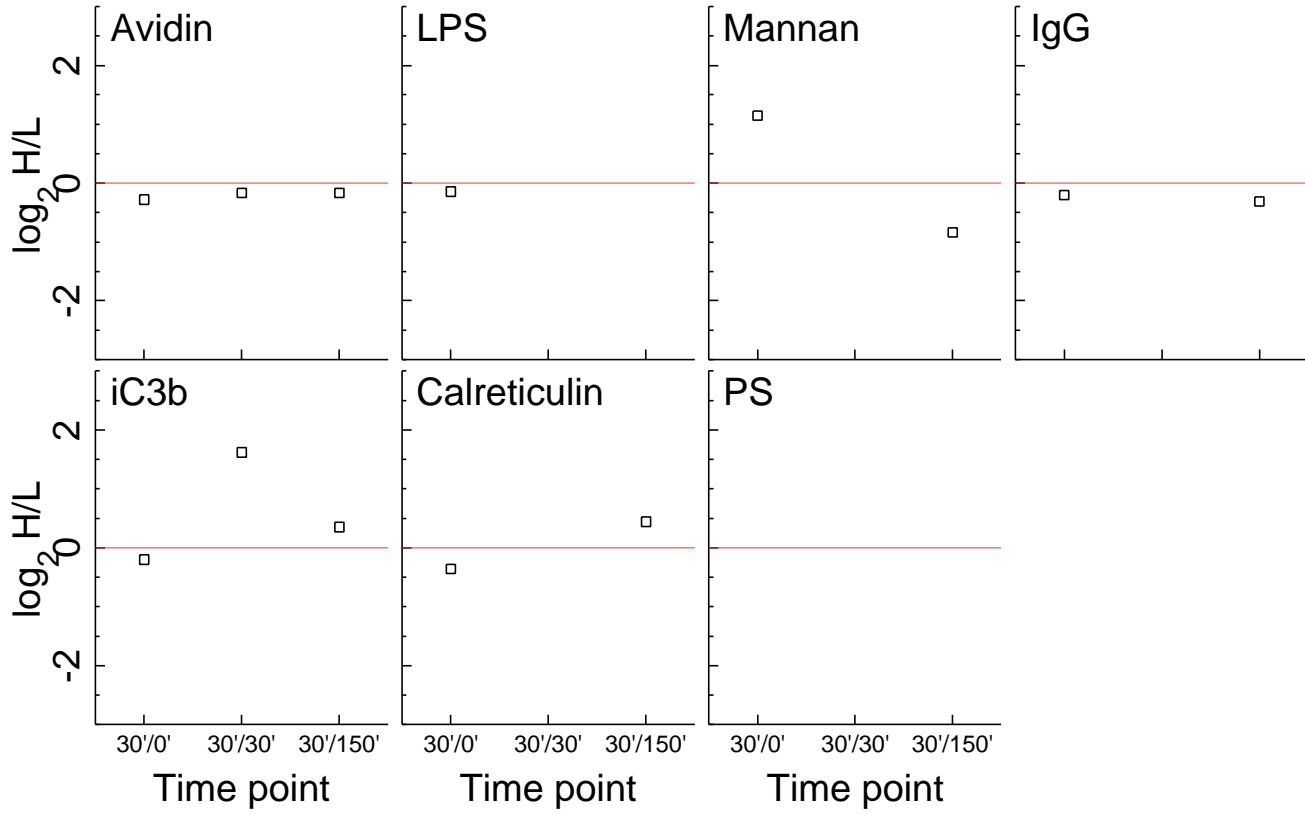

### cisd2 (Q9CQB5)

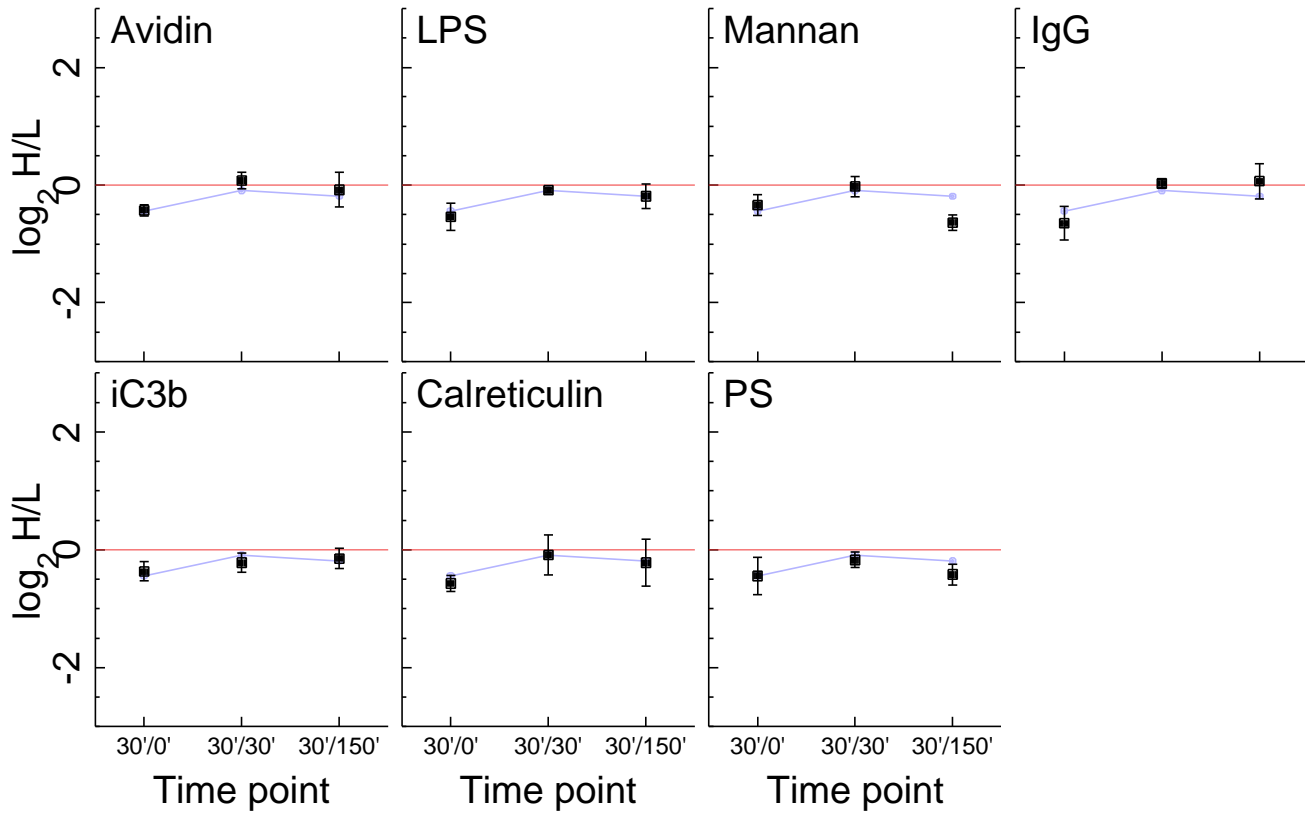

### ckap4 (Q8BMK4)

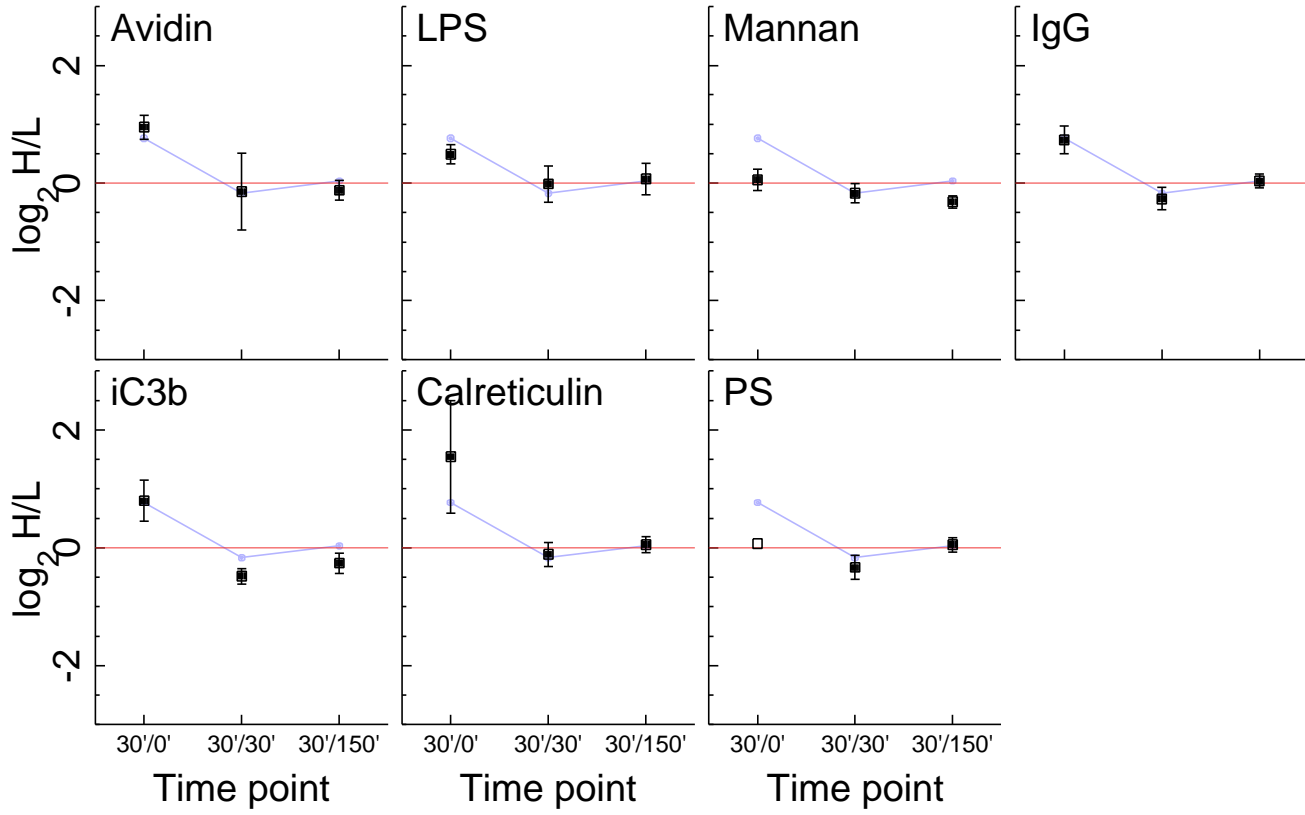

ckap5 (A2AGT5)

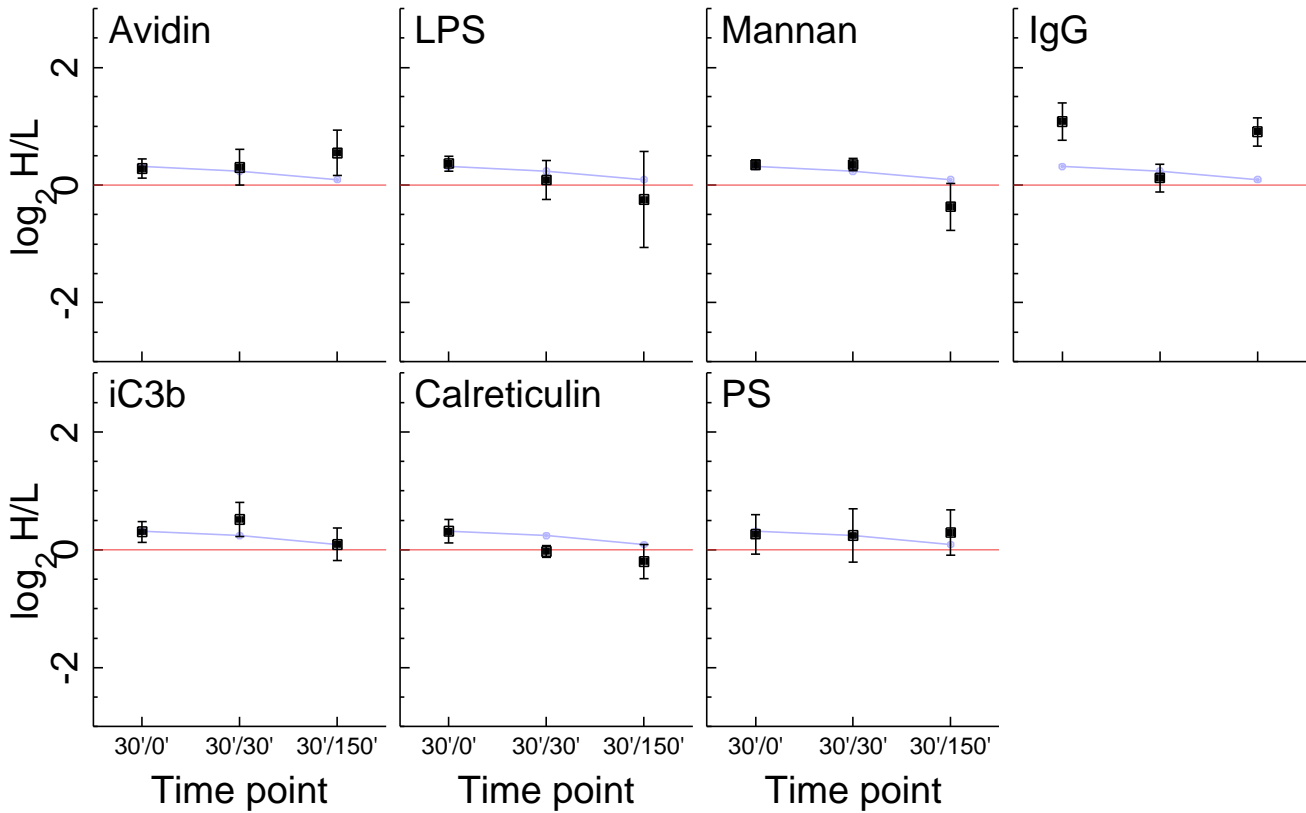

### ckb (Q04447)

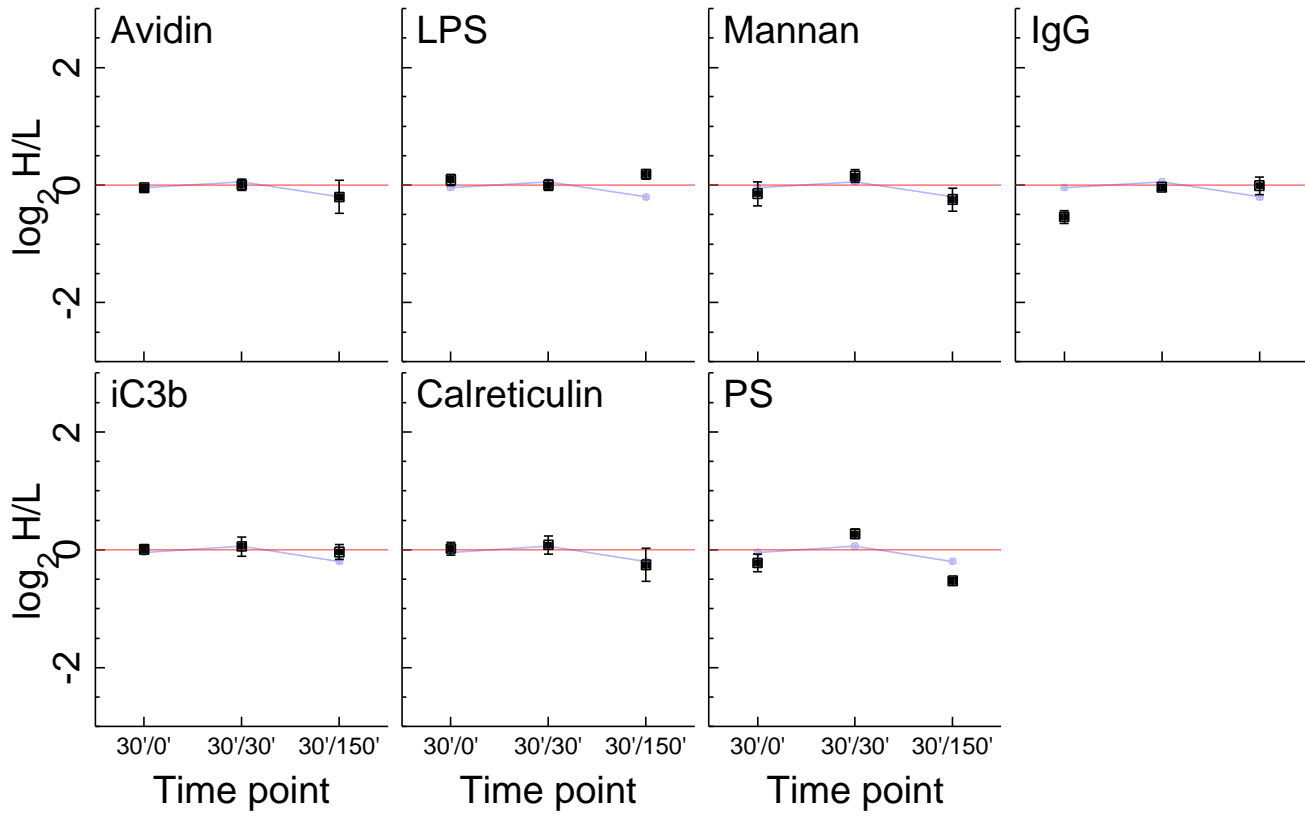

### clcn5 (B1ATV0)

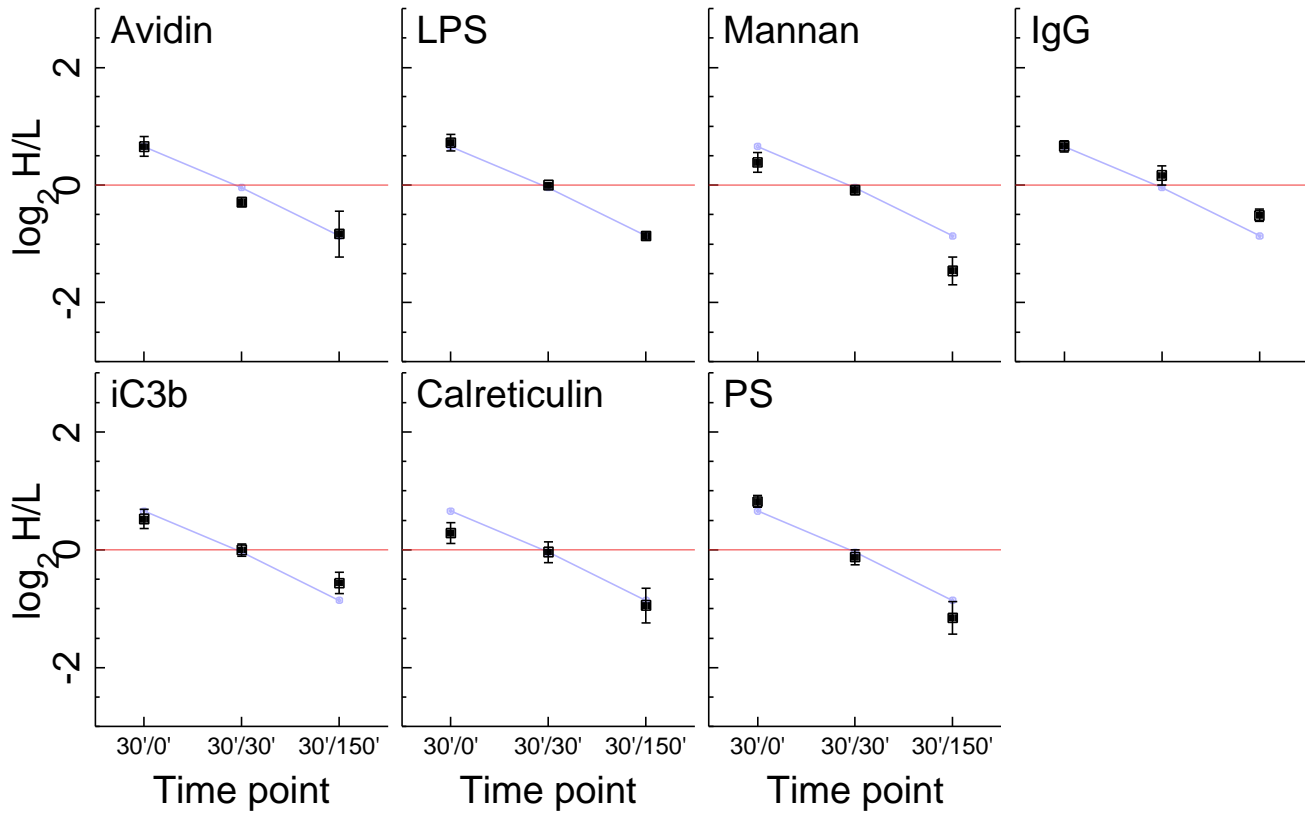

clcn6 (A2A7F6)

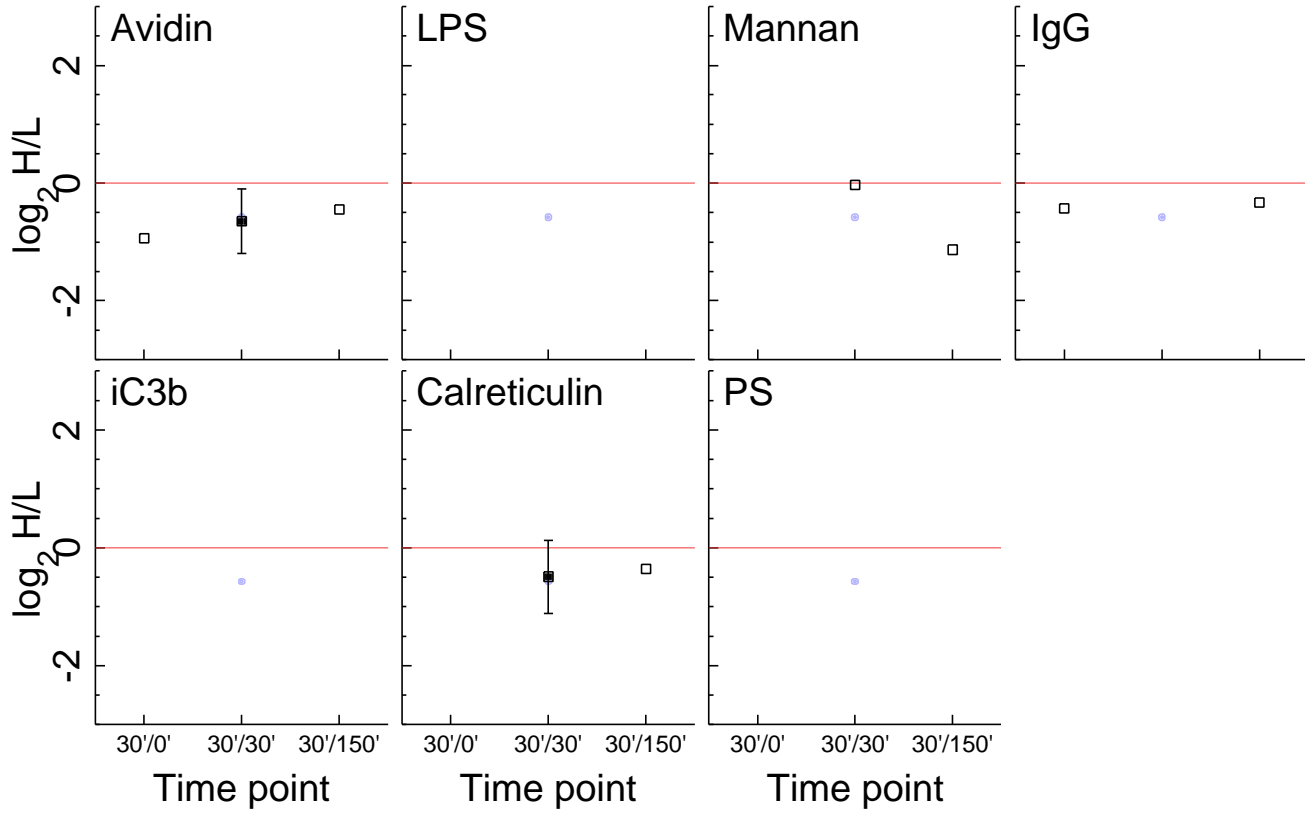



clcn7 (O70496)

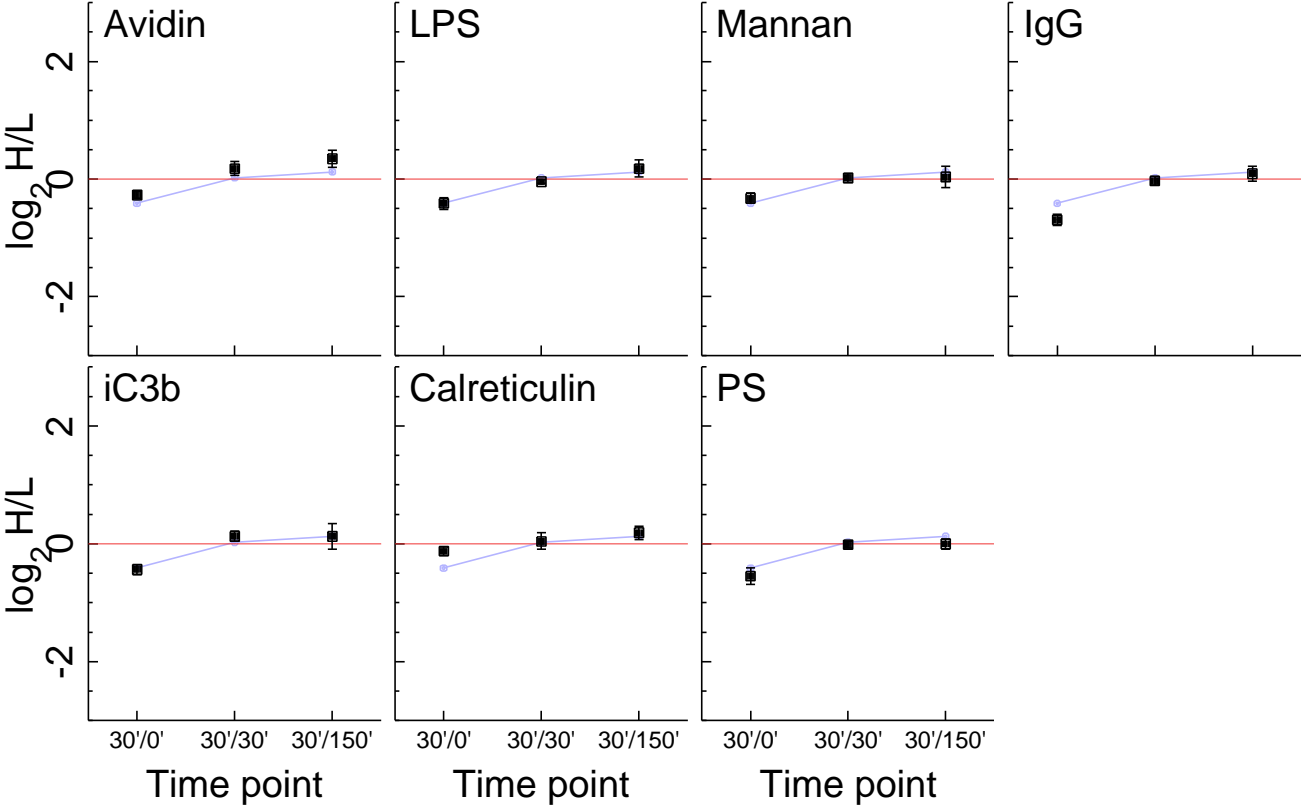

### clec10a (F8W7B7)

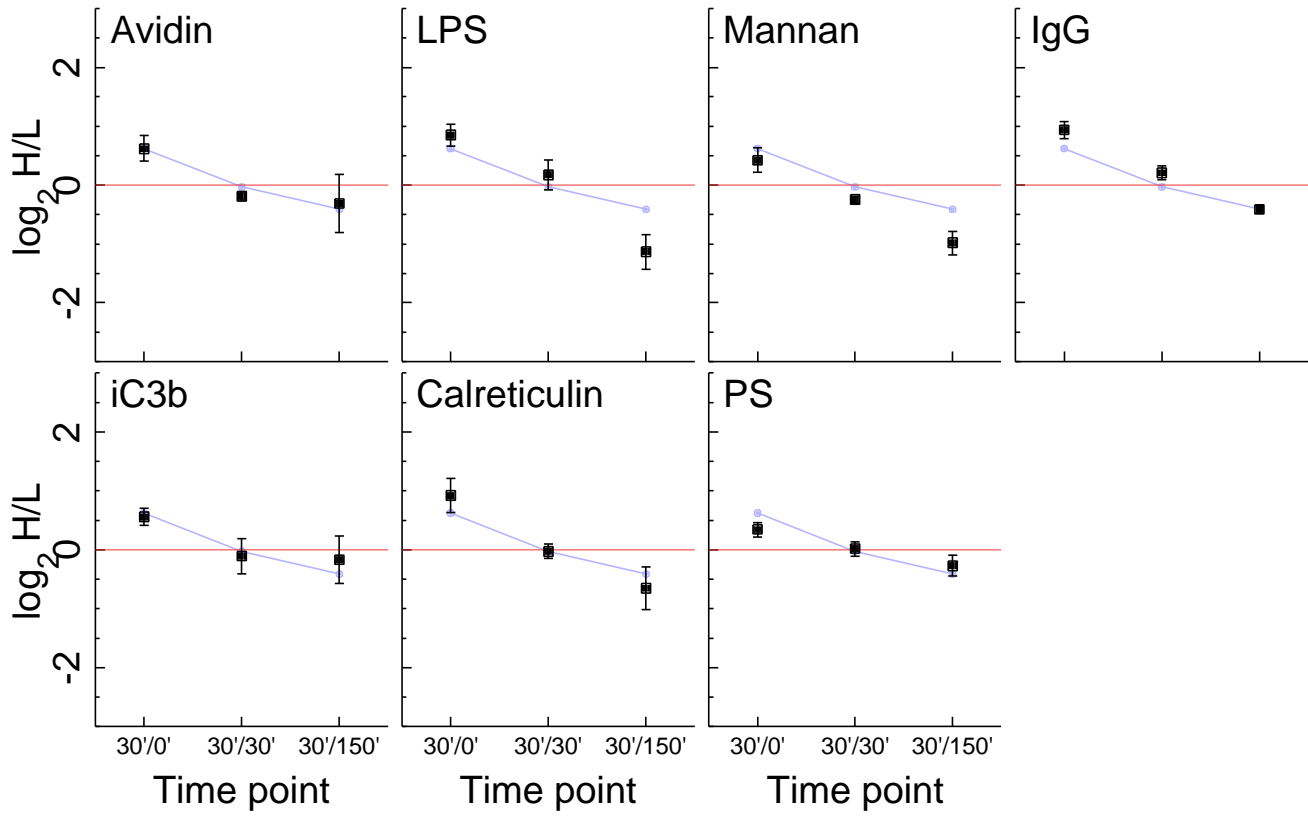

### clec12a (Q504P2)

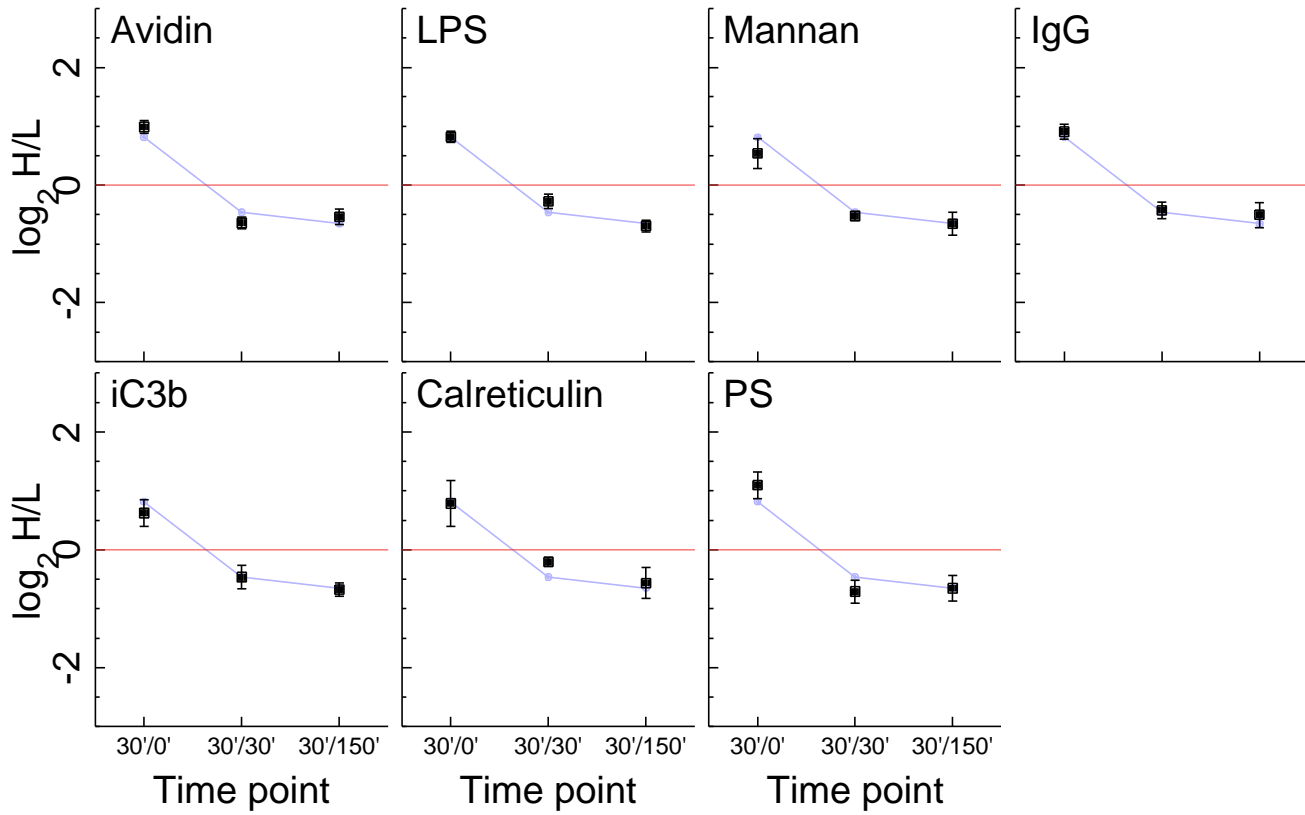

clec4e (Q9R0Q8)

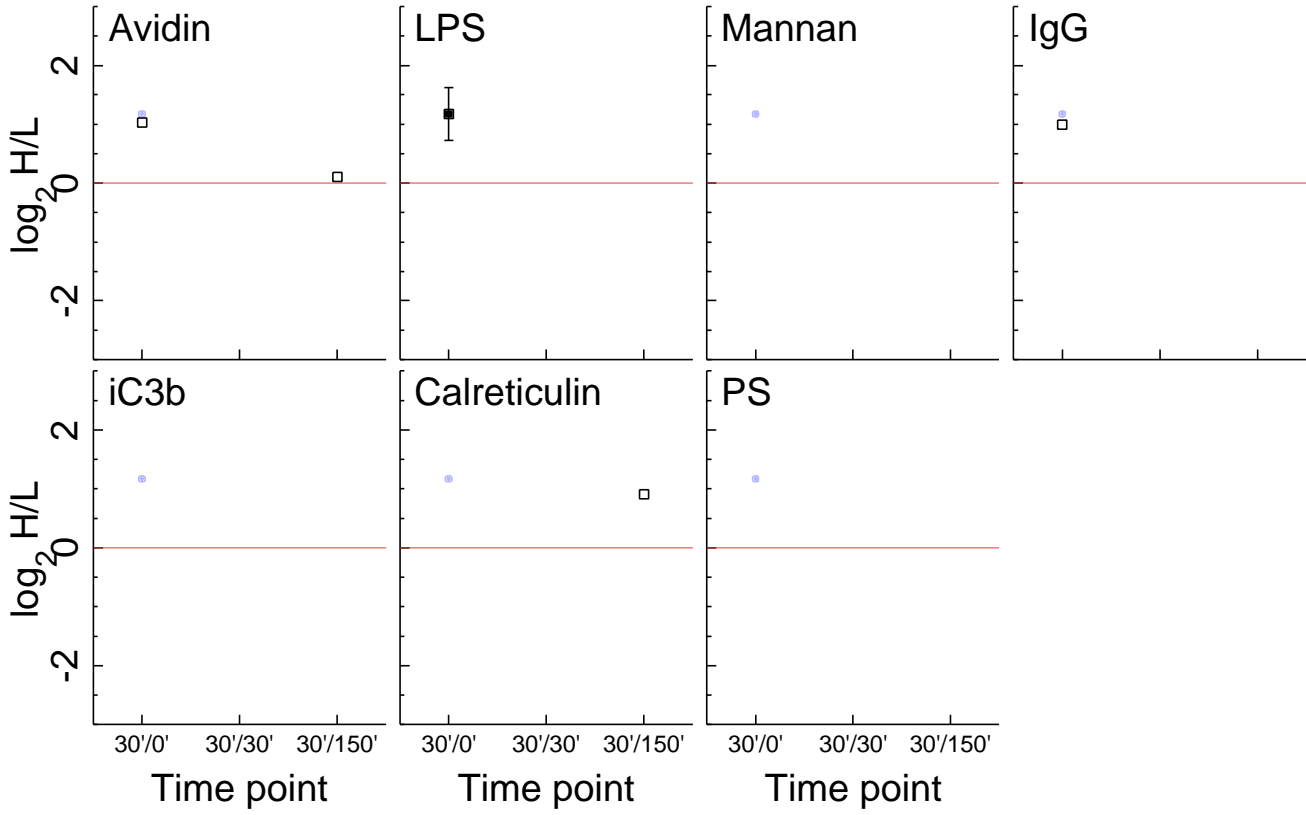

### clic1 (Q9Z1Q5)

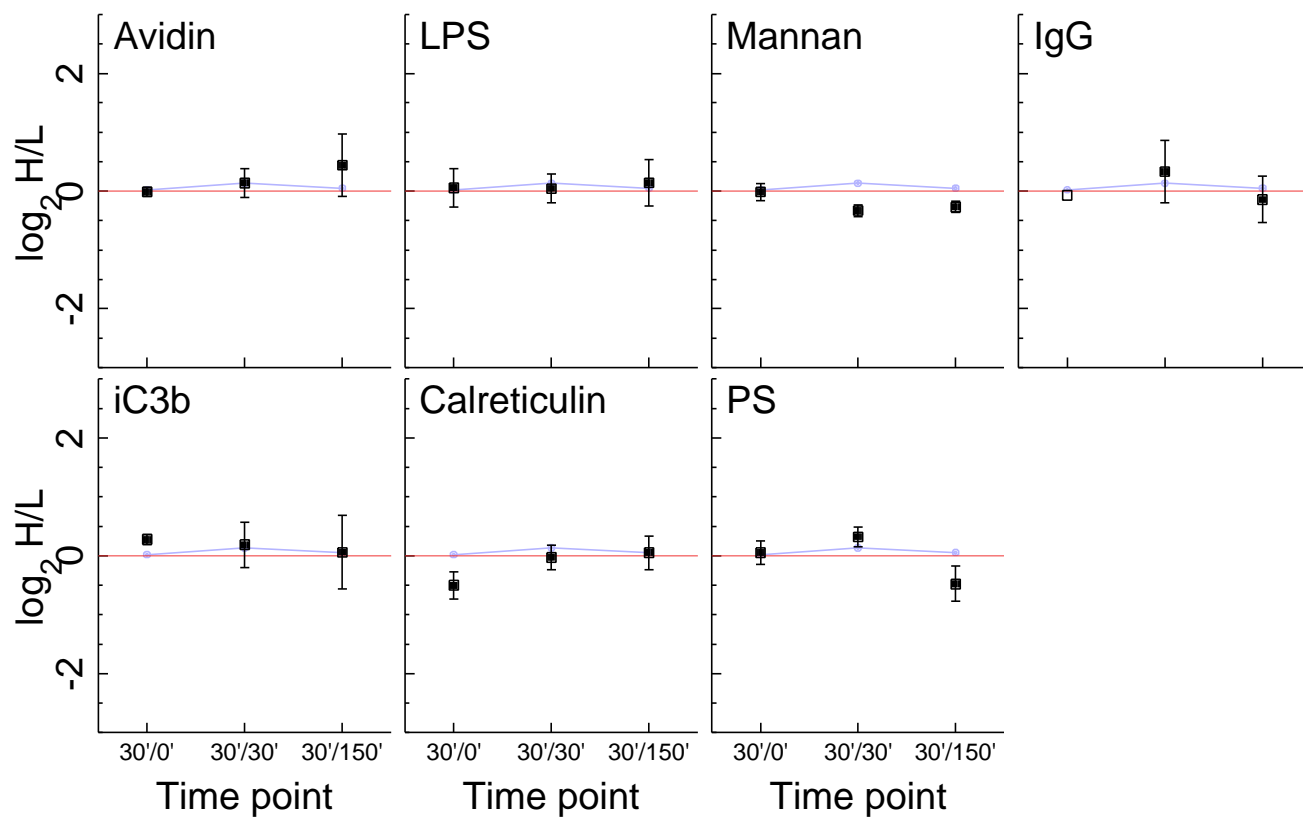

clint1 (Q5SUH7)

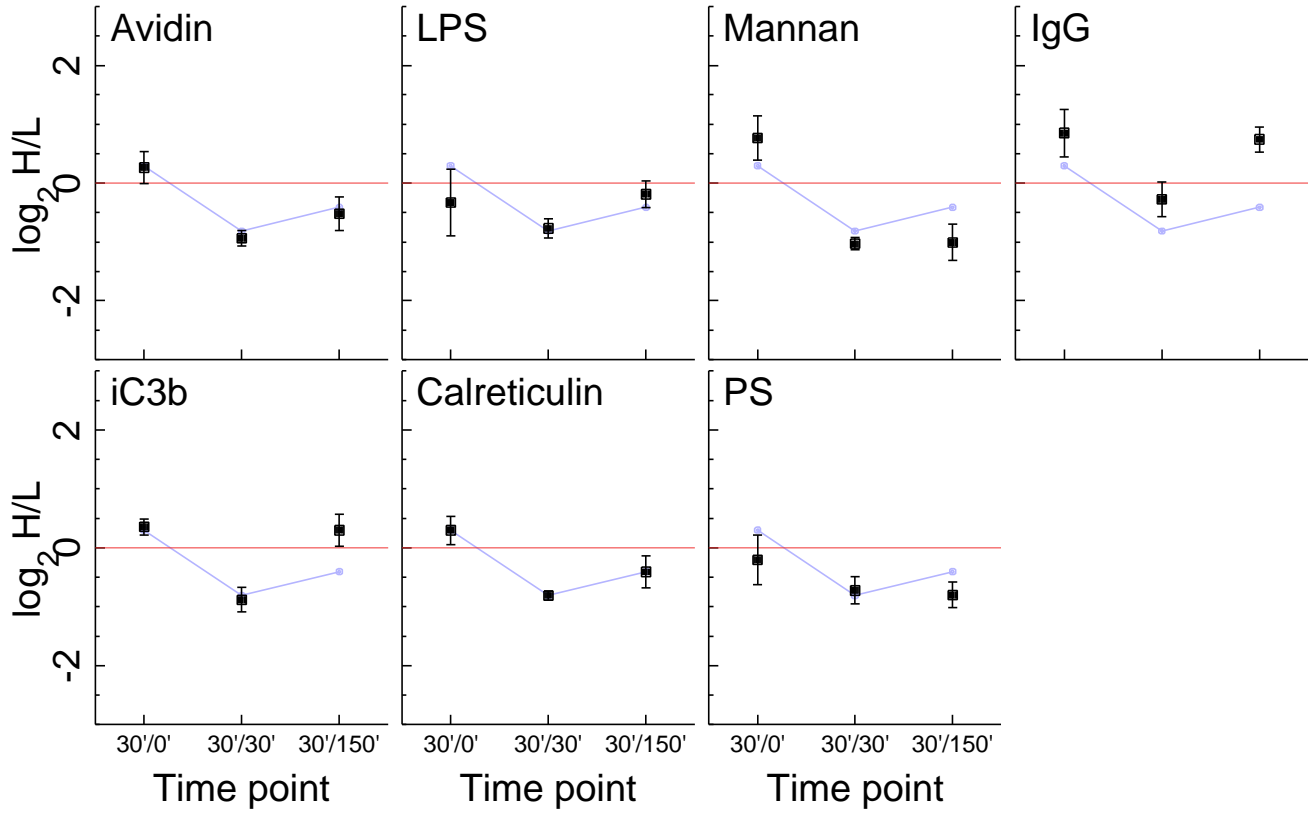

### cln3 (Q61124)

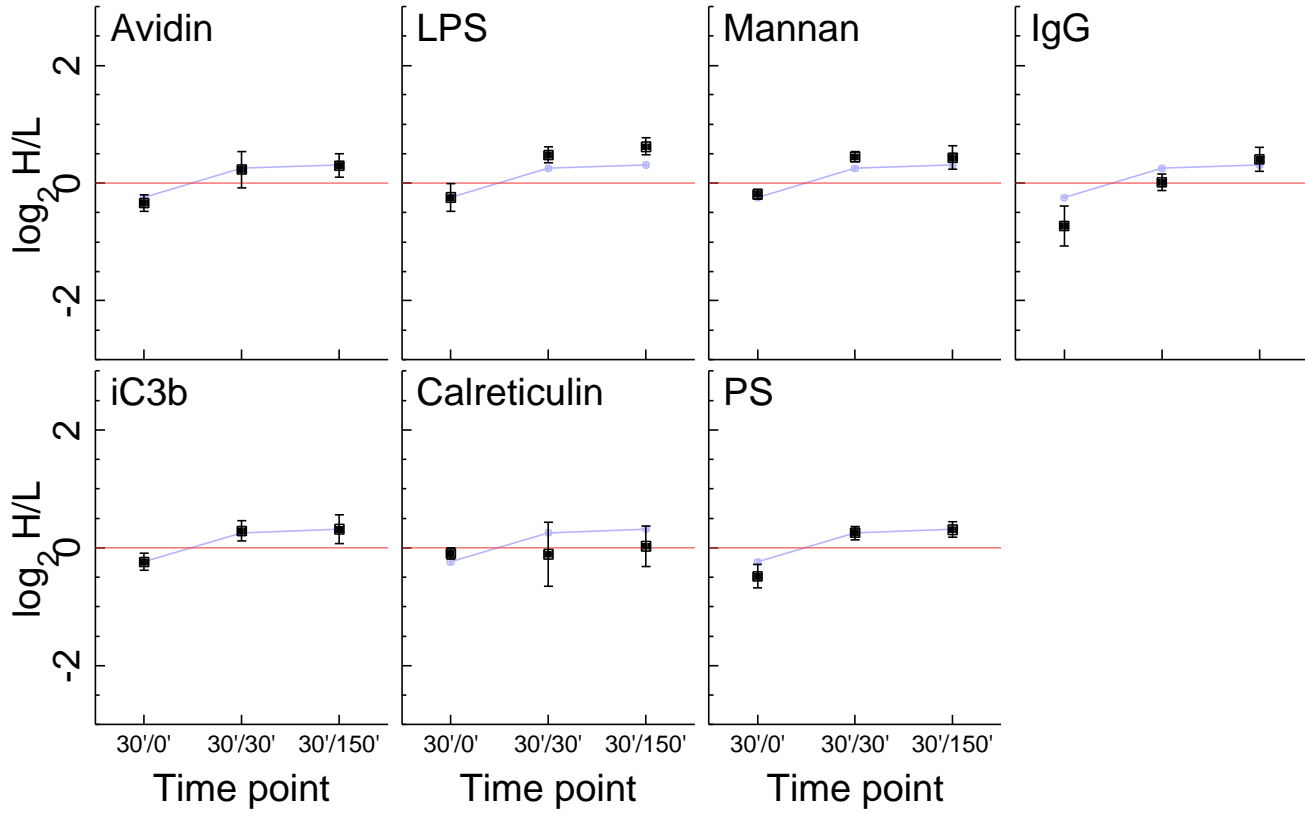

cIn5 (Q3UMW8)

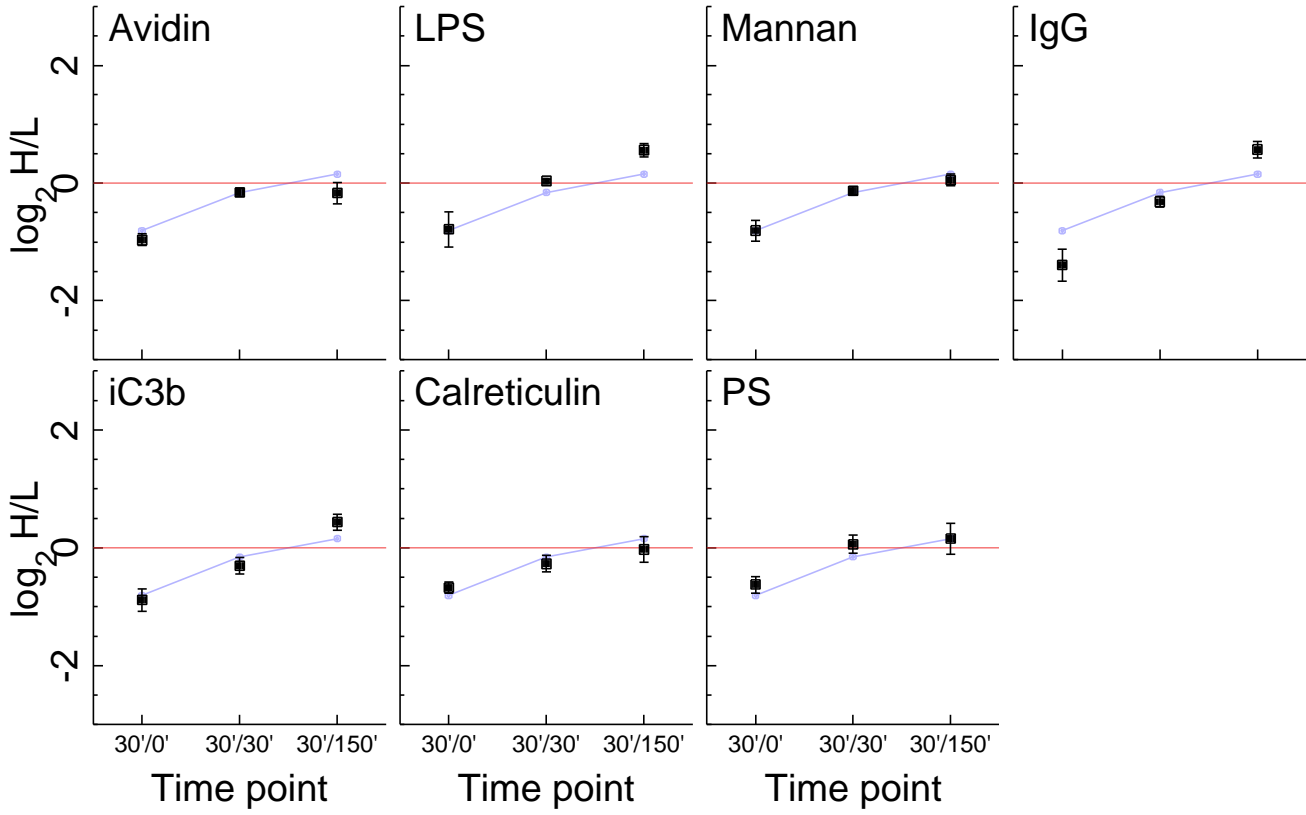



### clptm1 (Q8VBZ3)

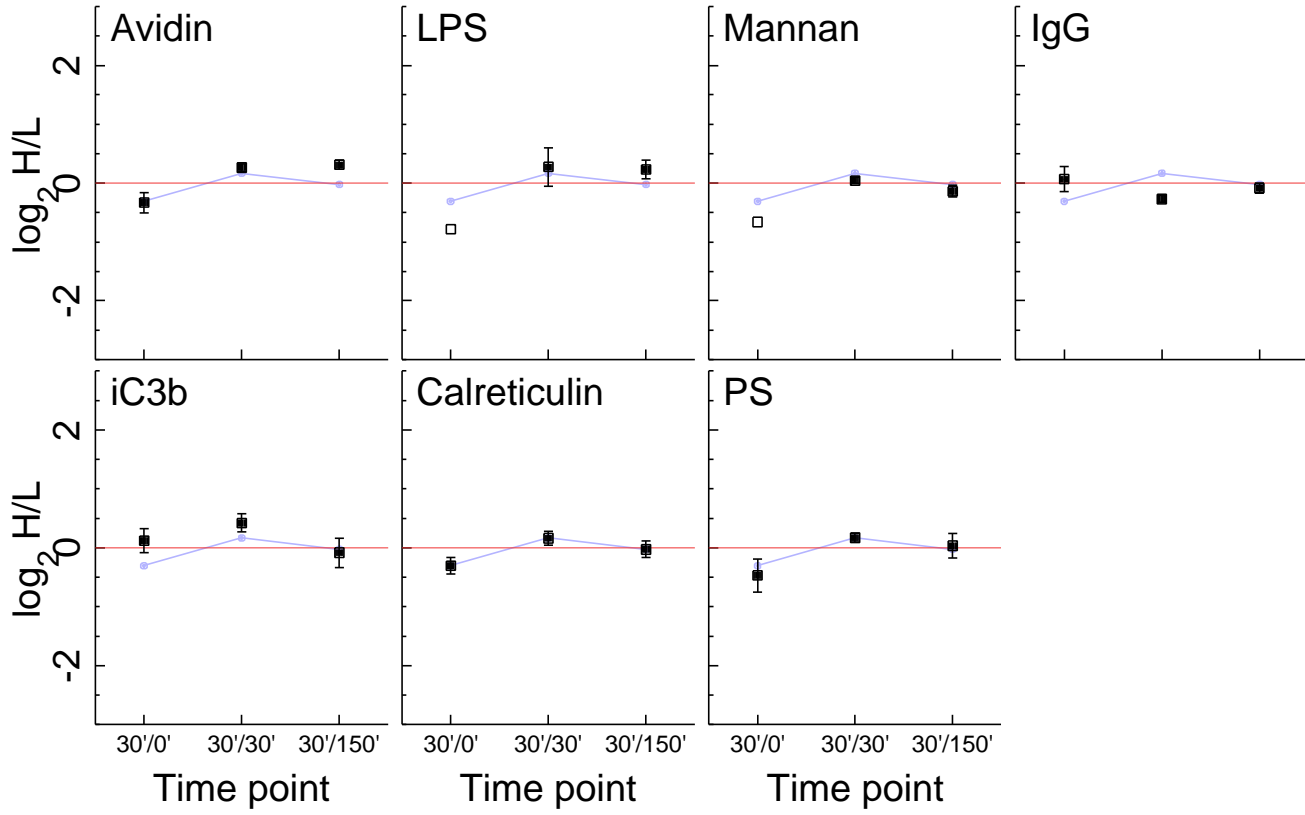

clrn2 (B2RVW2)

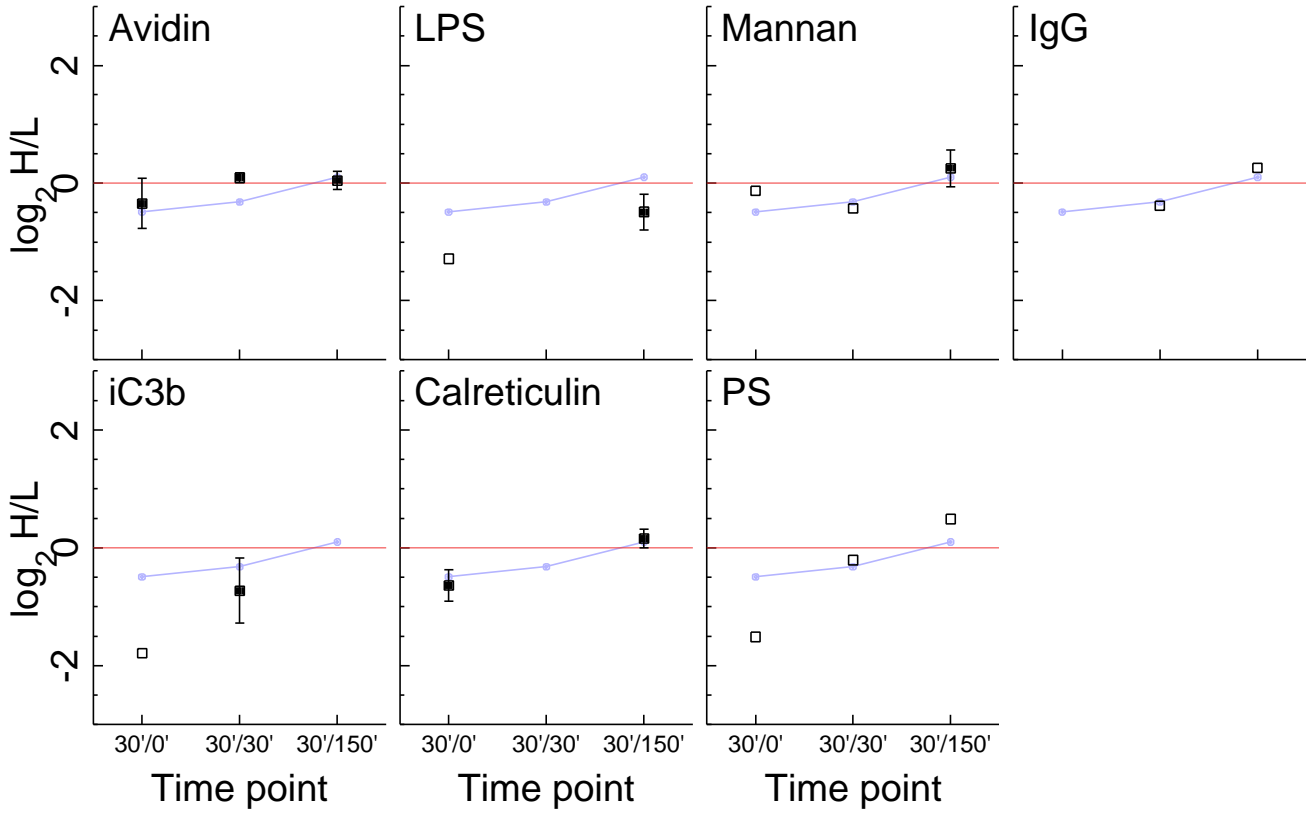

clta (B1AWD9)

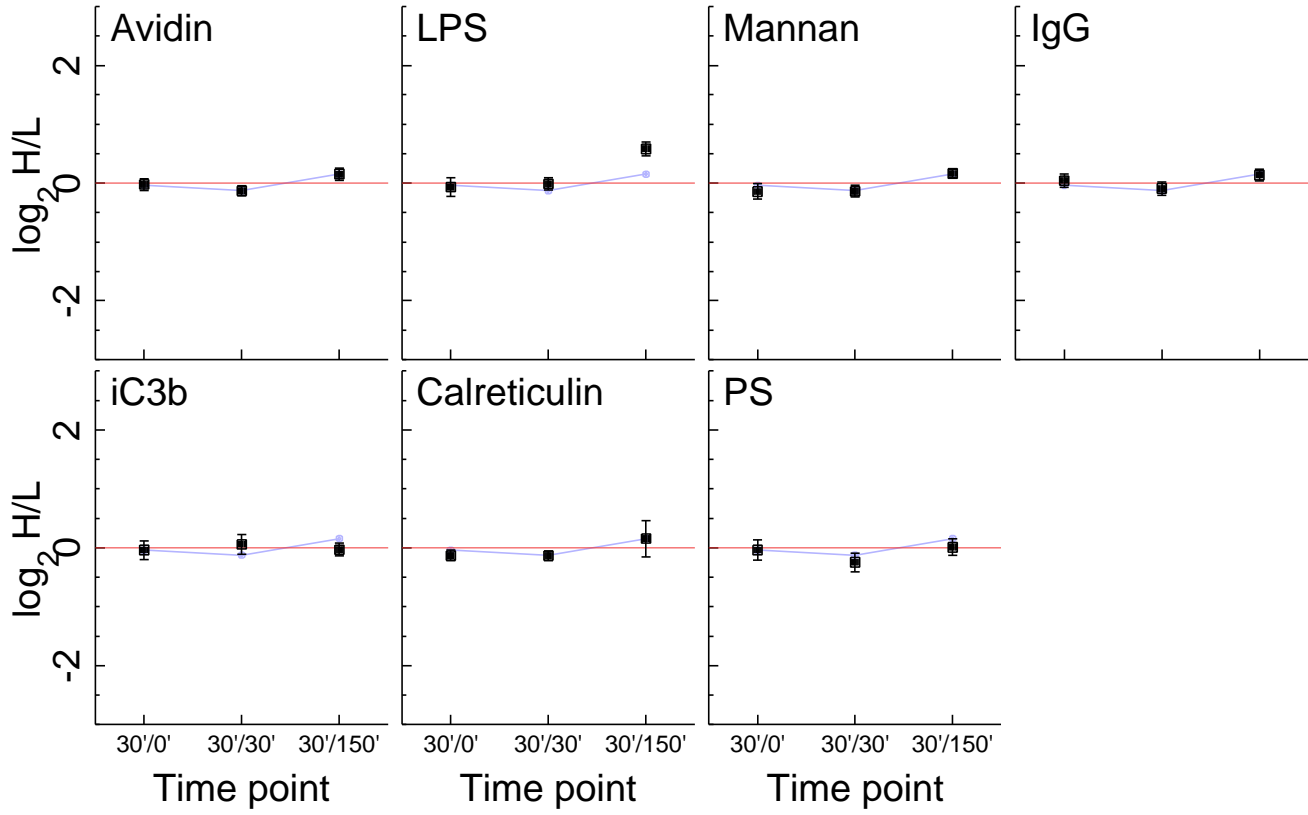

cltc (Q5SXR6)

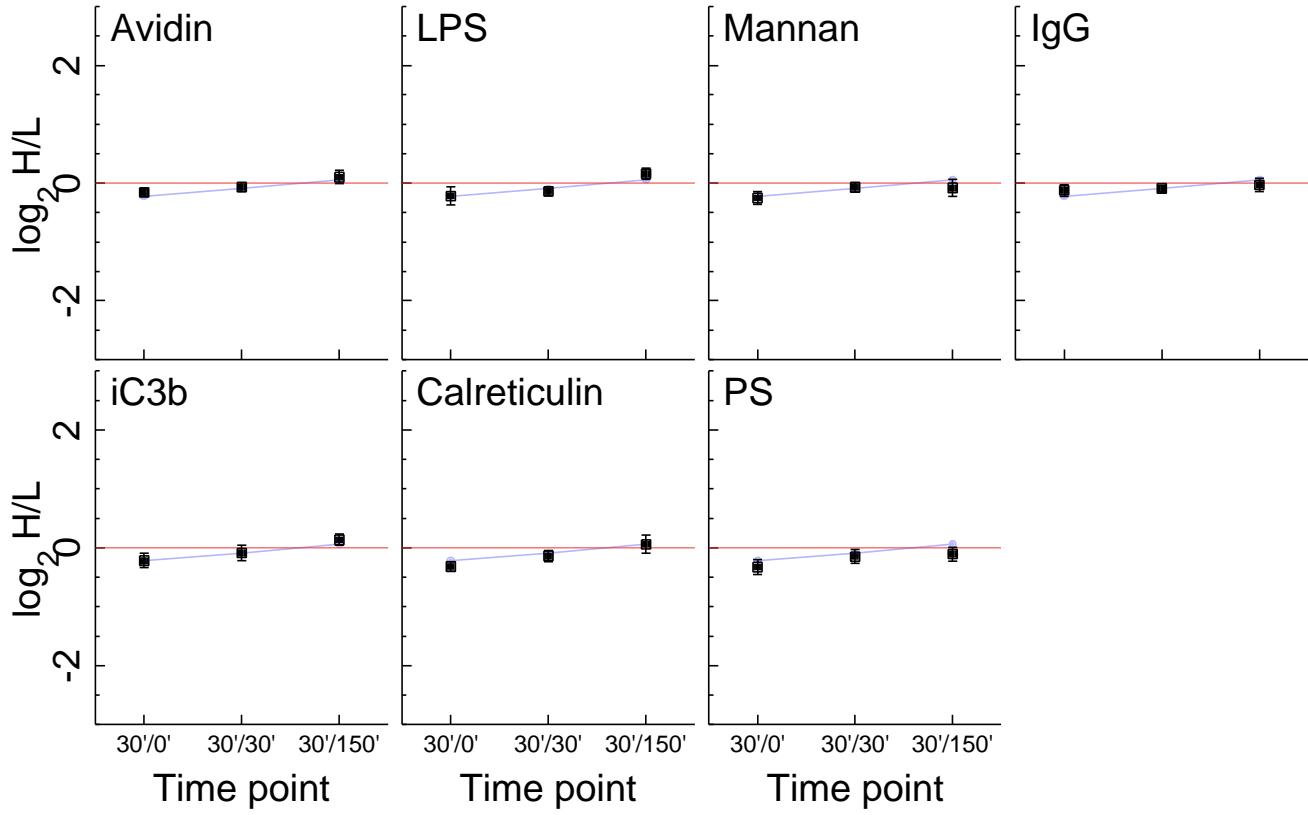

cmtm6 (Q9CZ69)

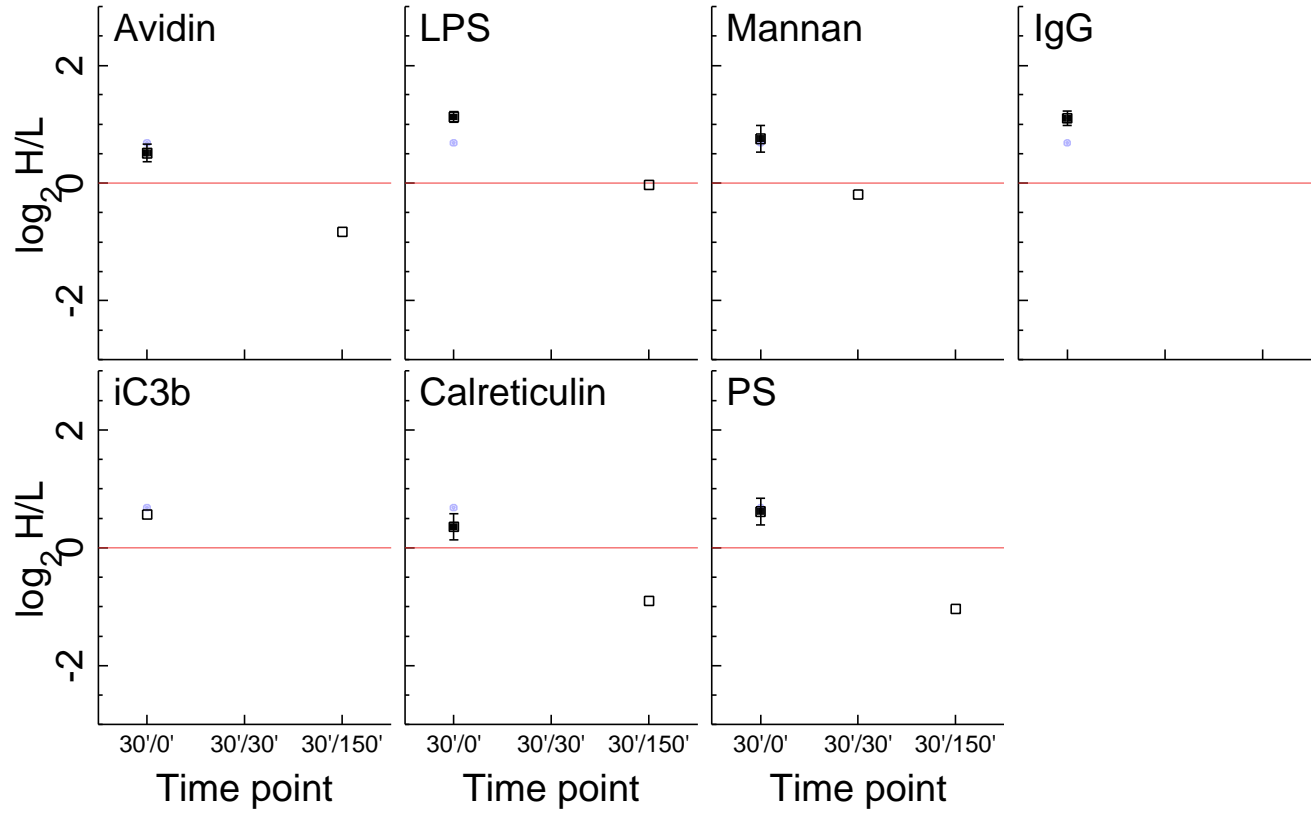

cndp2 (Q9D1A2)

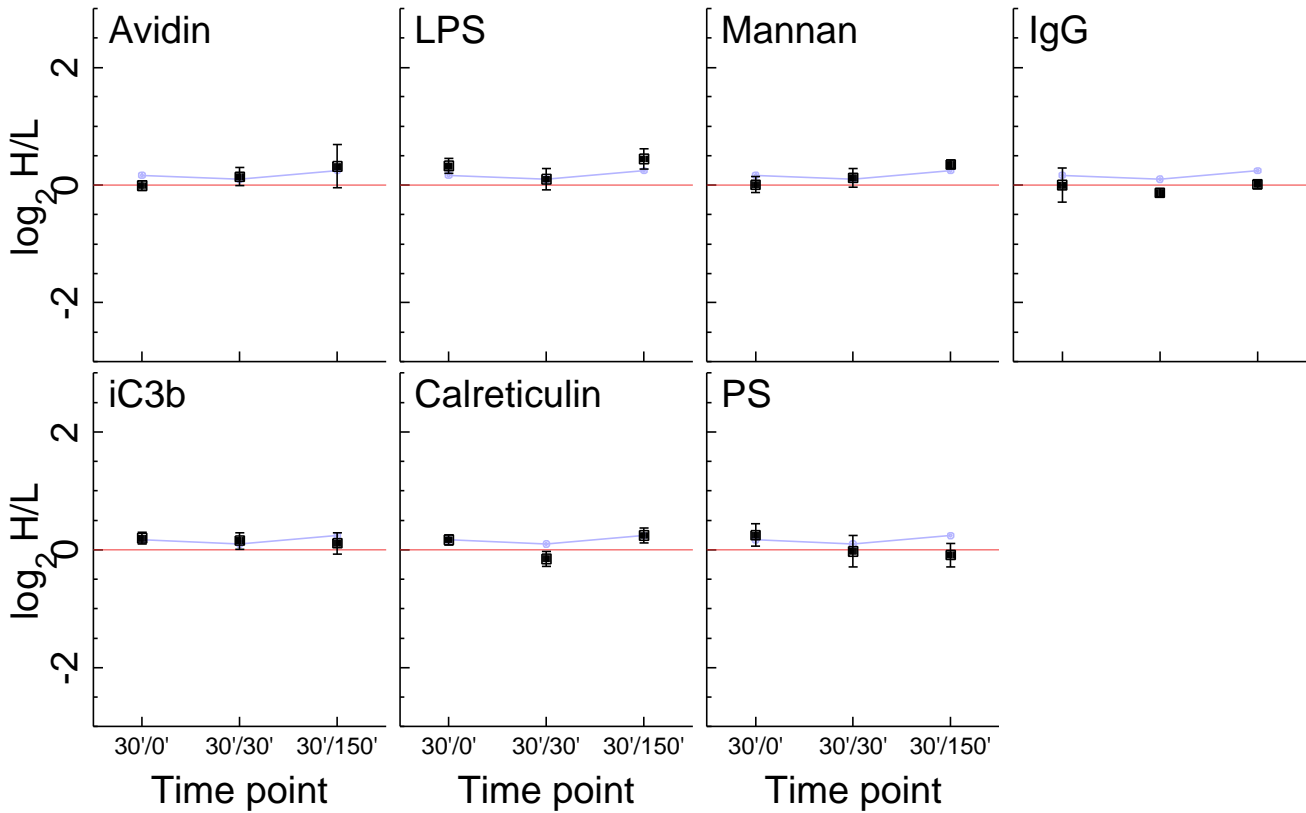

cnih4 (Q9CX13)

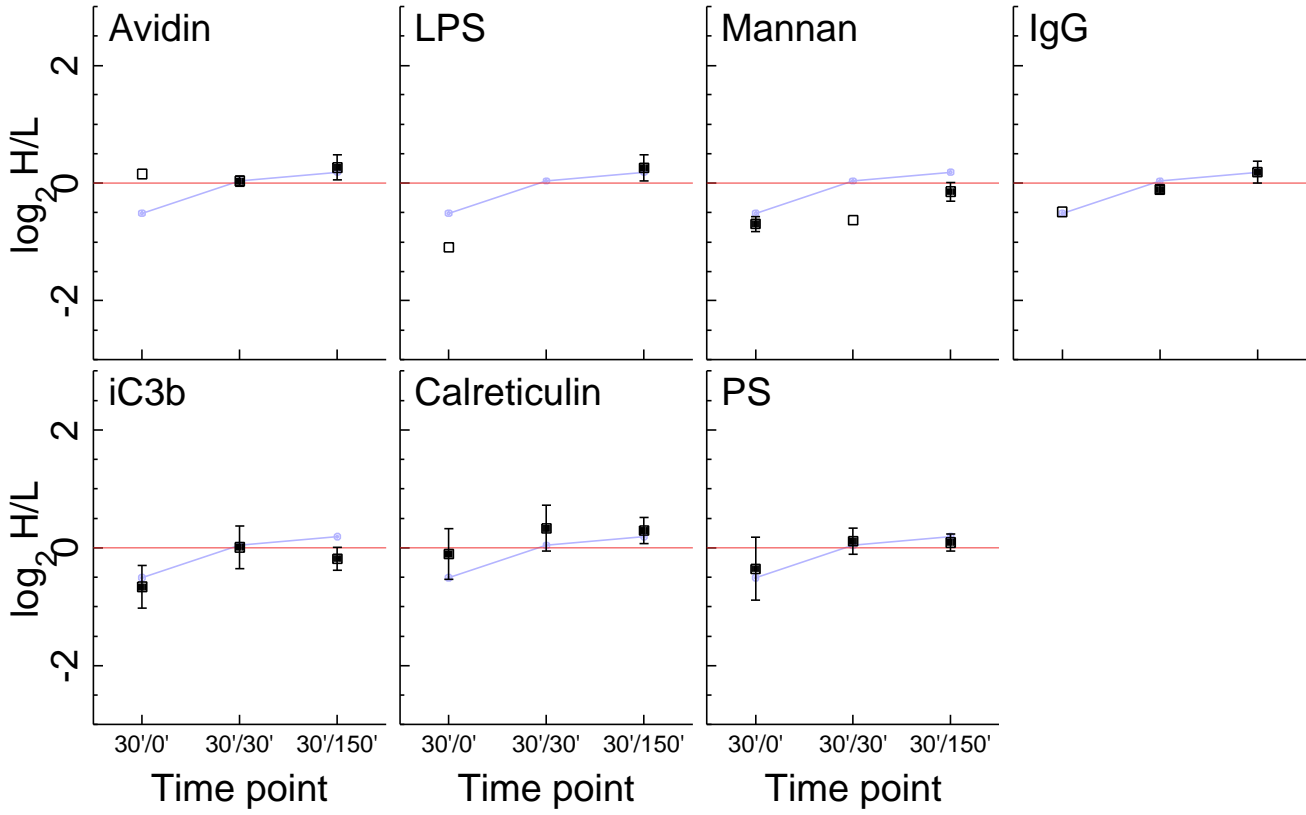

cnn2 (Q08093)

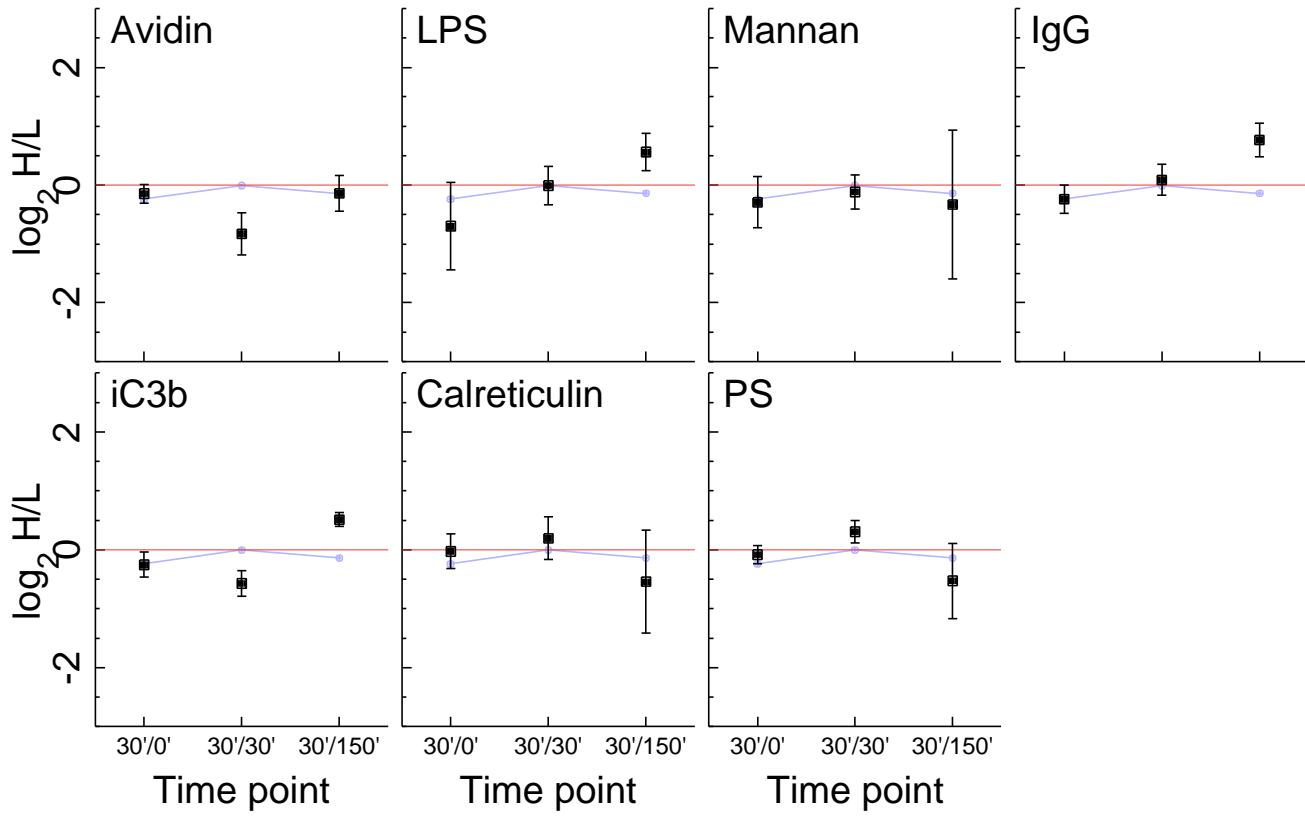



### cnot4 (Q8BT14)

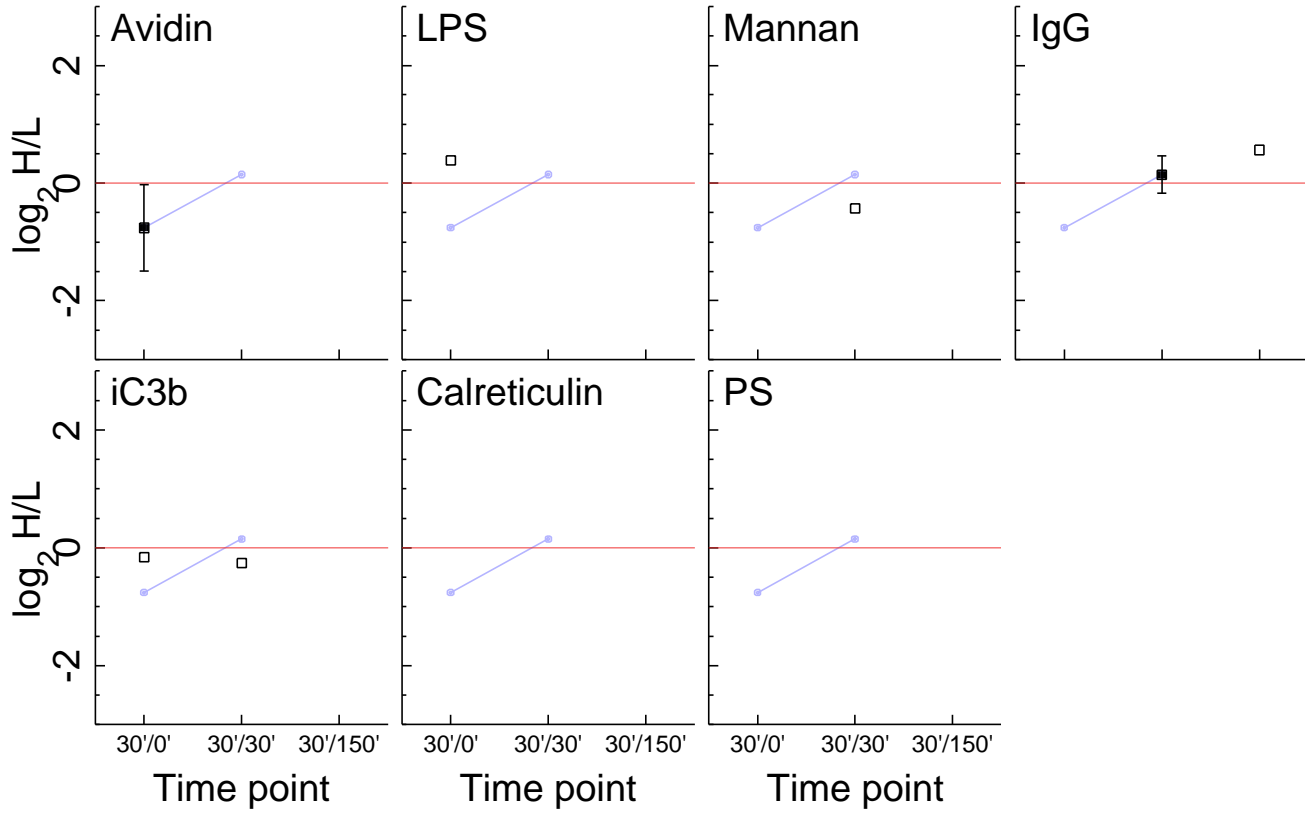

cnp (P16330)

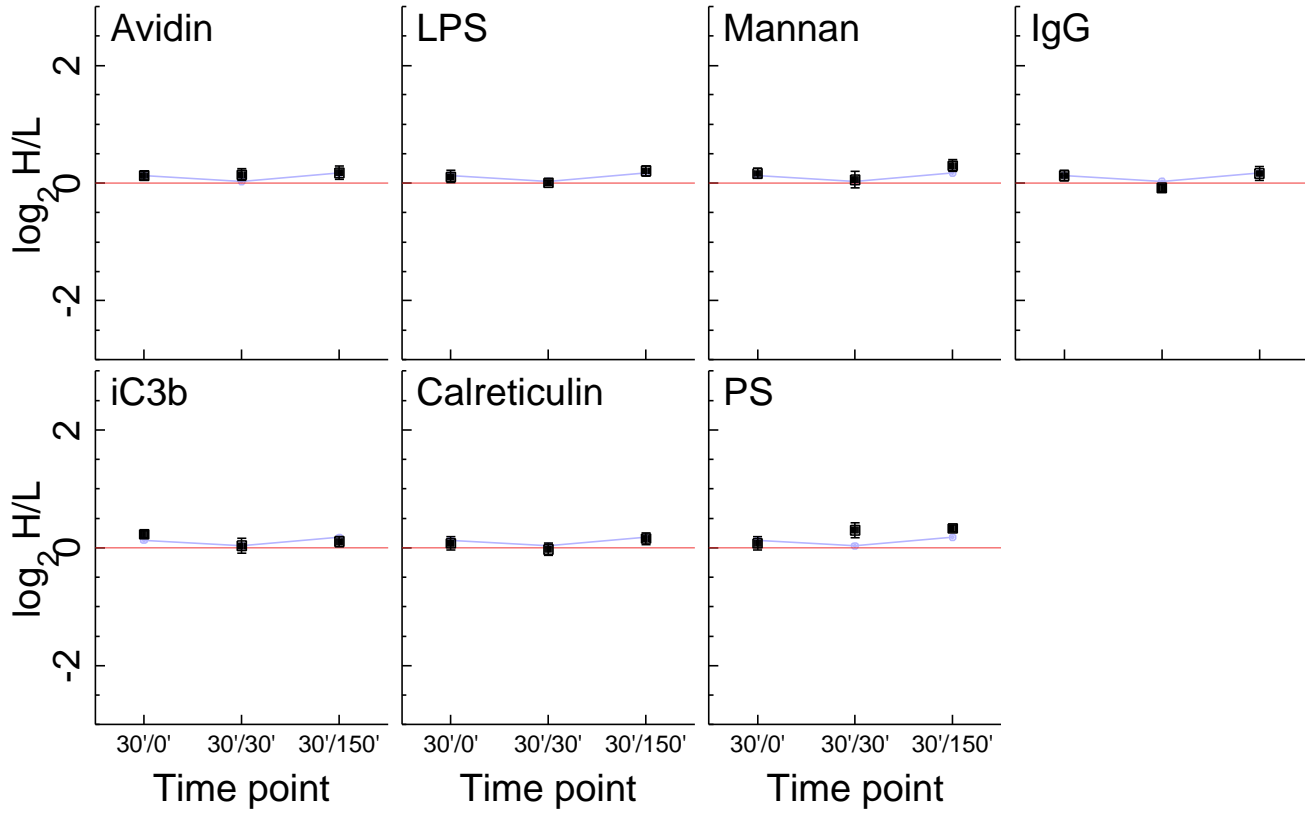

cnpy2 (Q9QXT0)

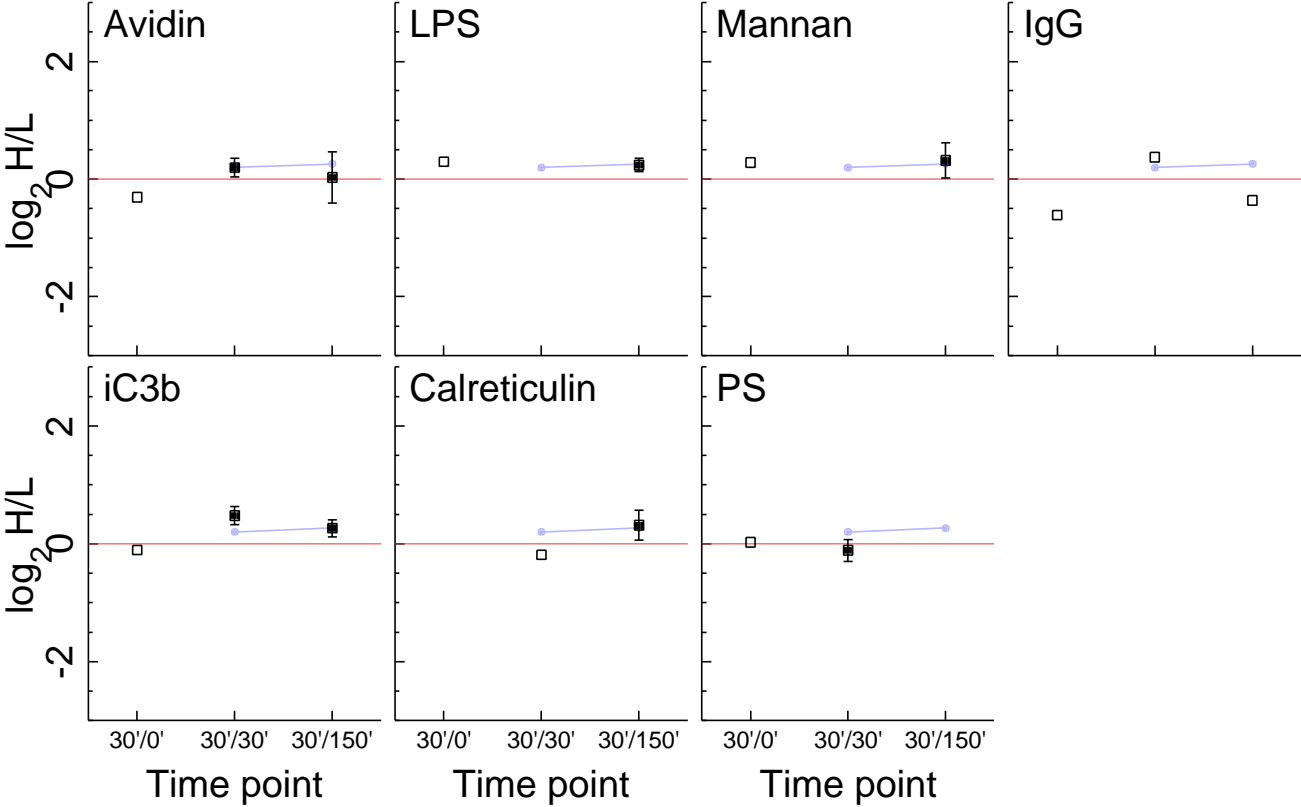

cnpy3 (Q9DAU1)

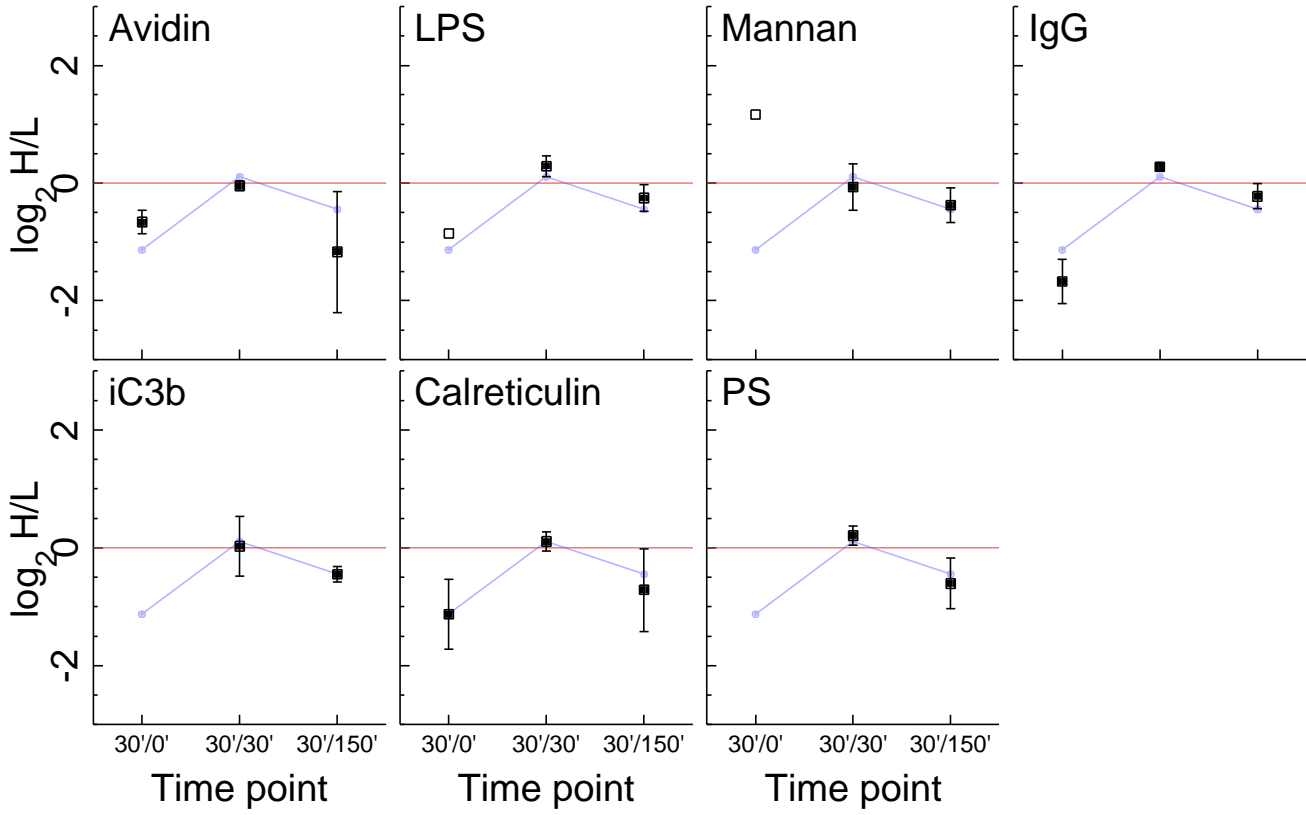

cnpy4 (Q8BQ47)

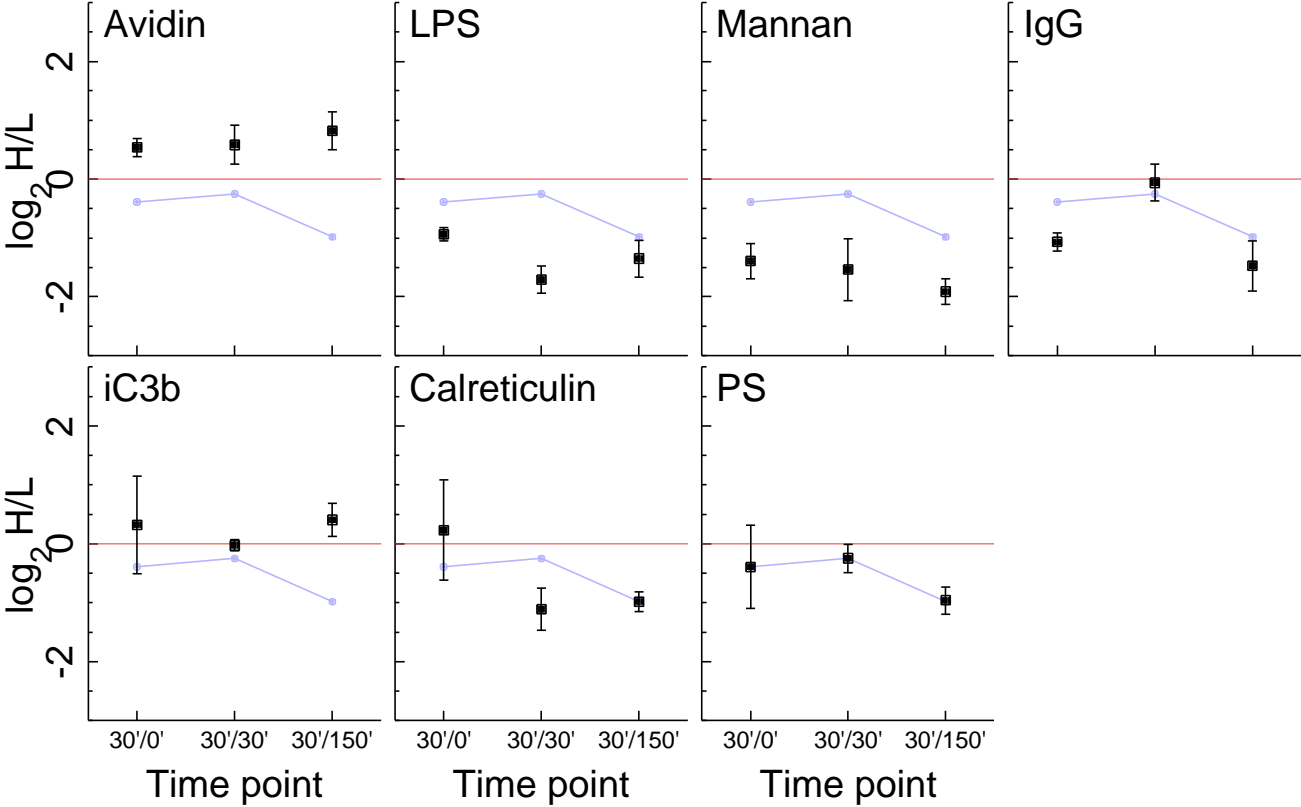

### col4a4 (Q9QZR9)

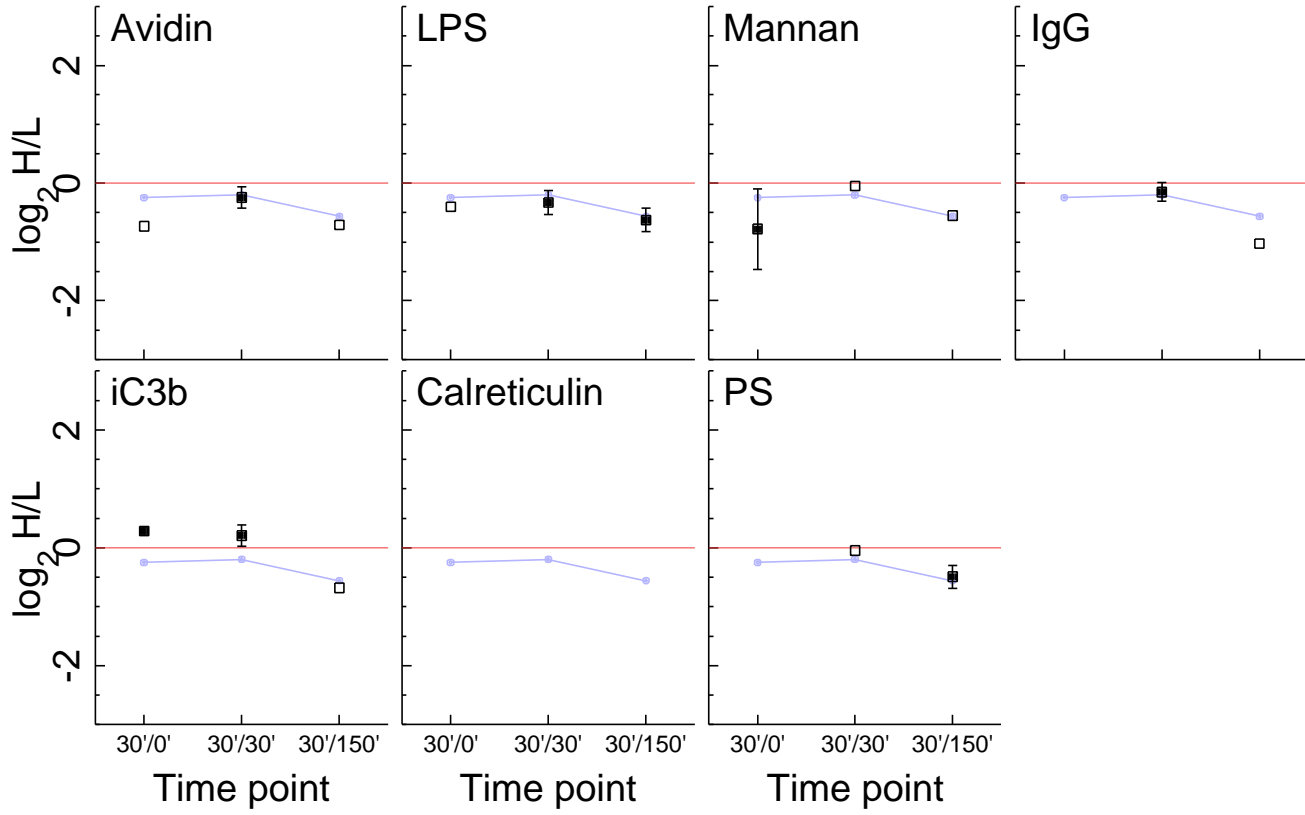

### col6a3 (E9PWQ3)

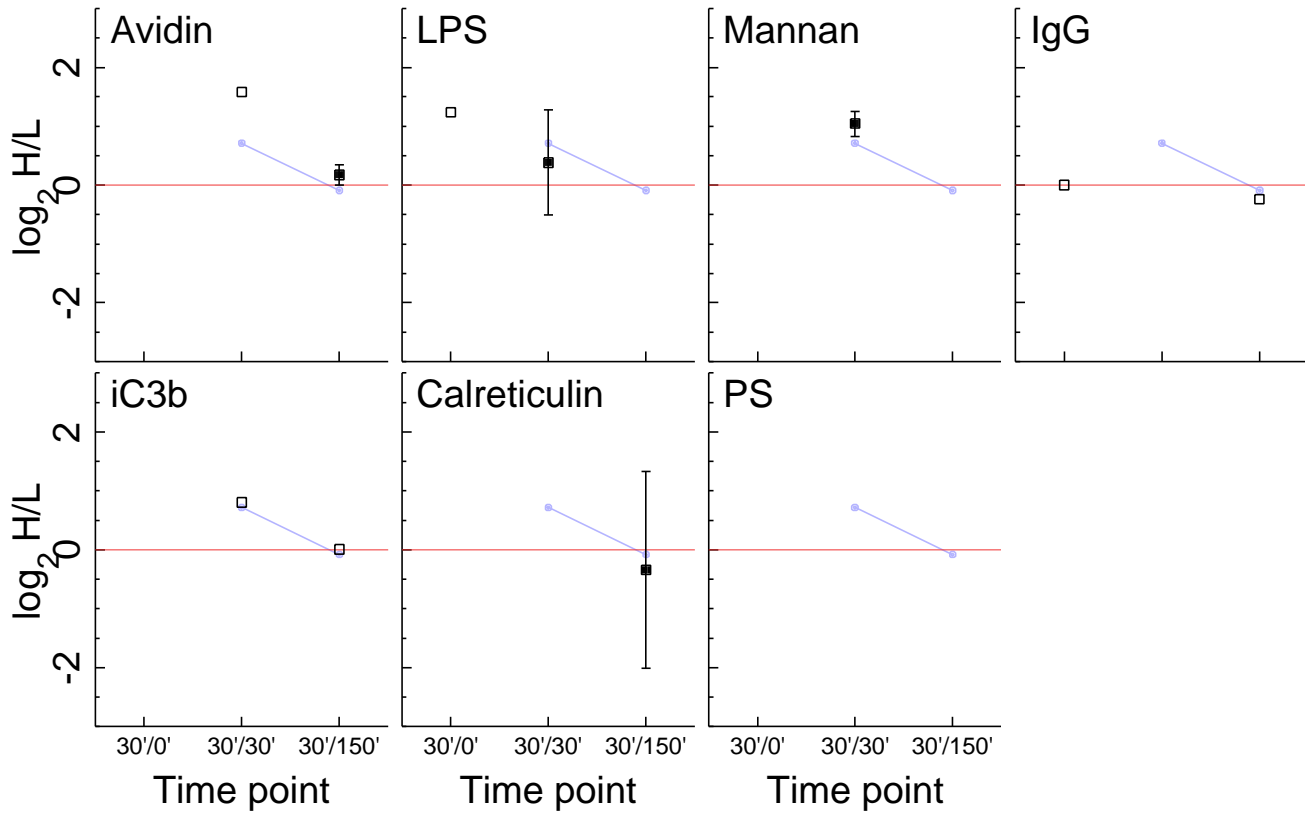

colec12 (Q8K4Q8)

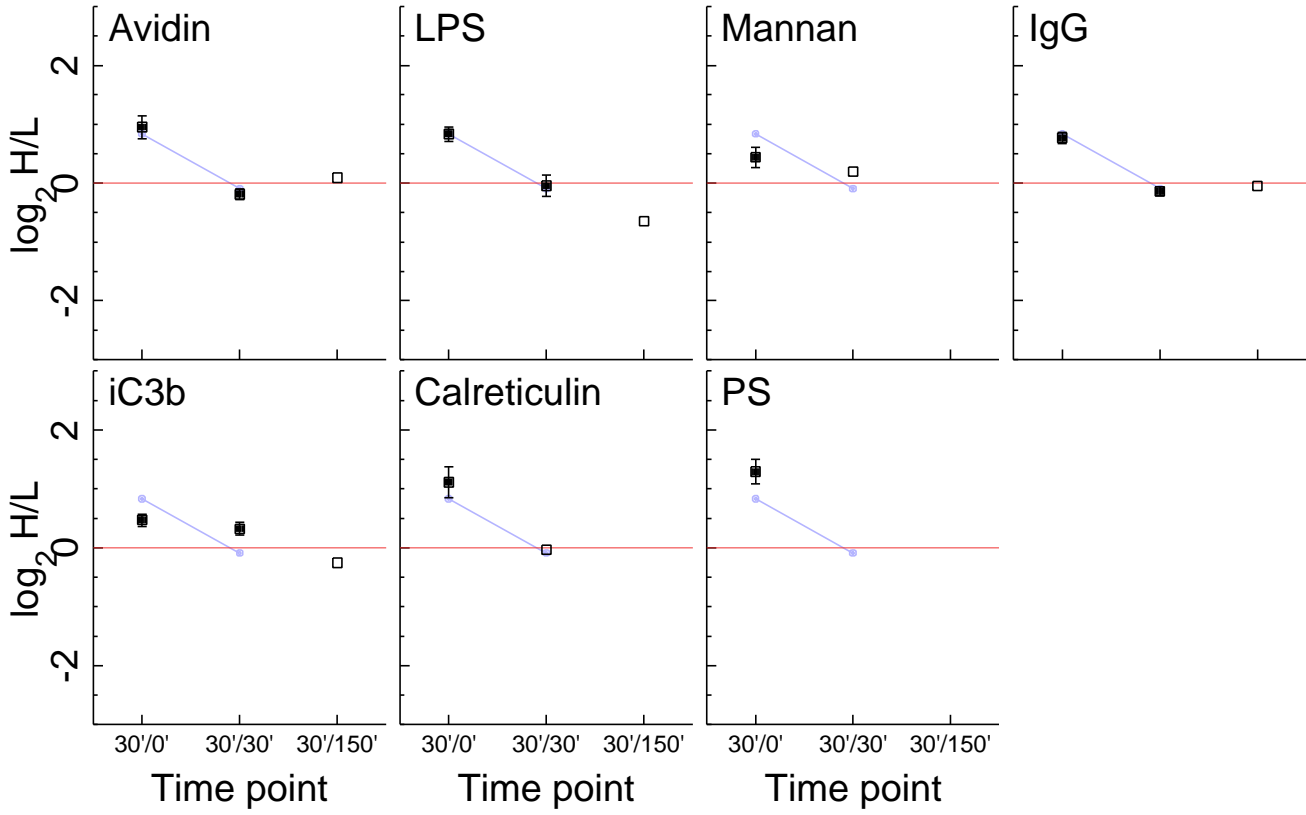



commd10 (Q8JZY2)

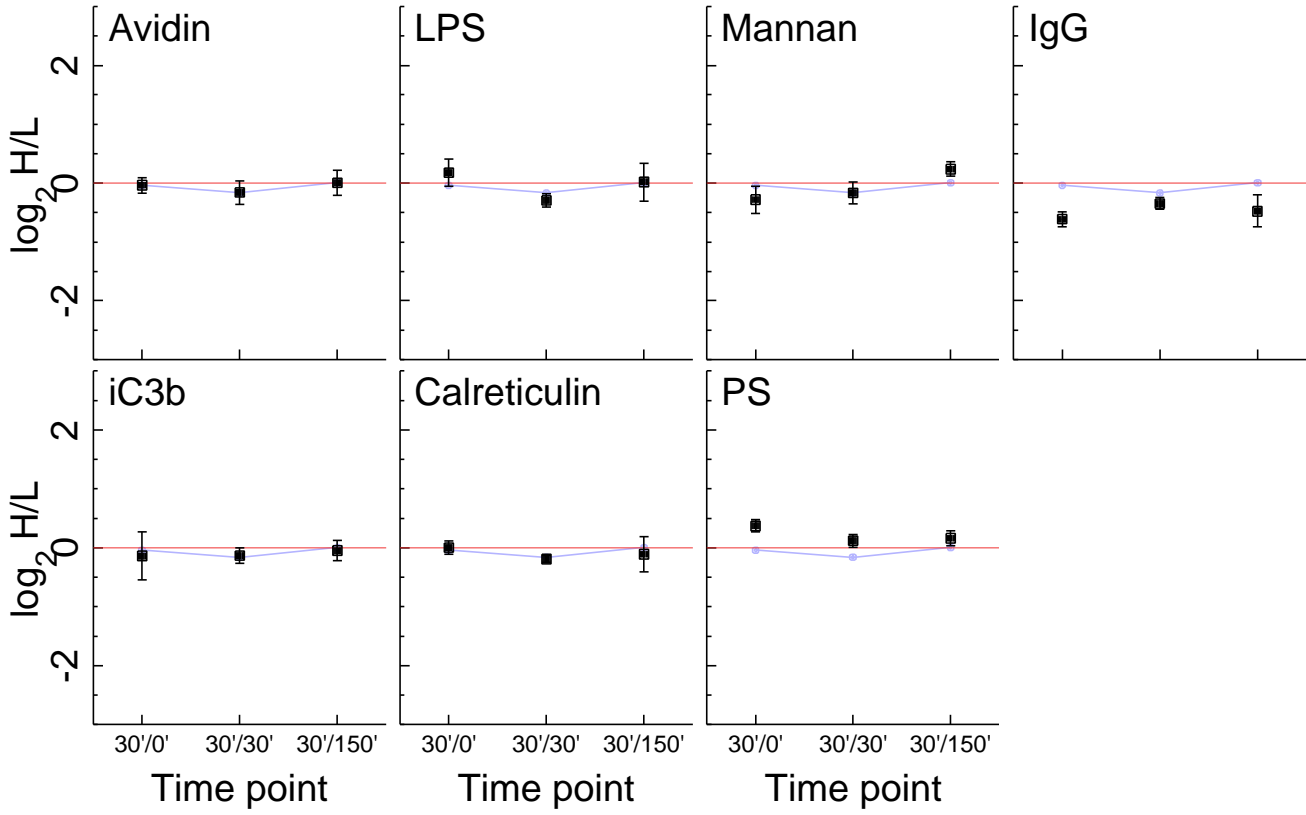

### commd1 (Q8VI86)

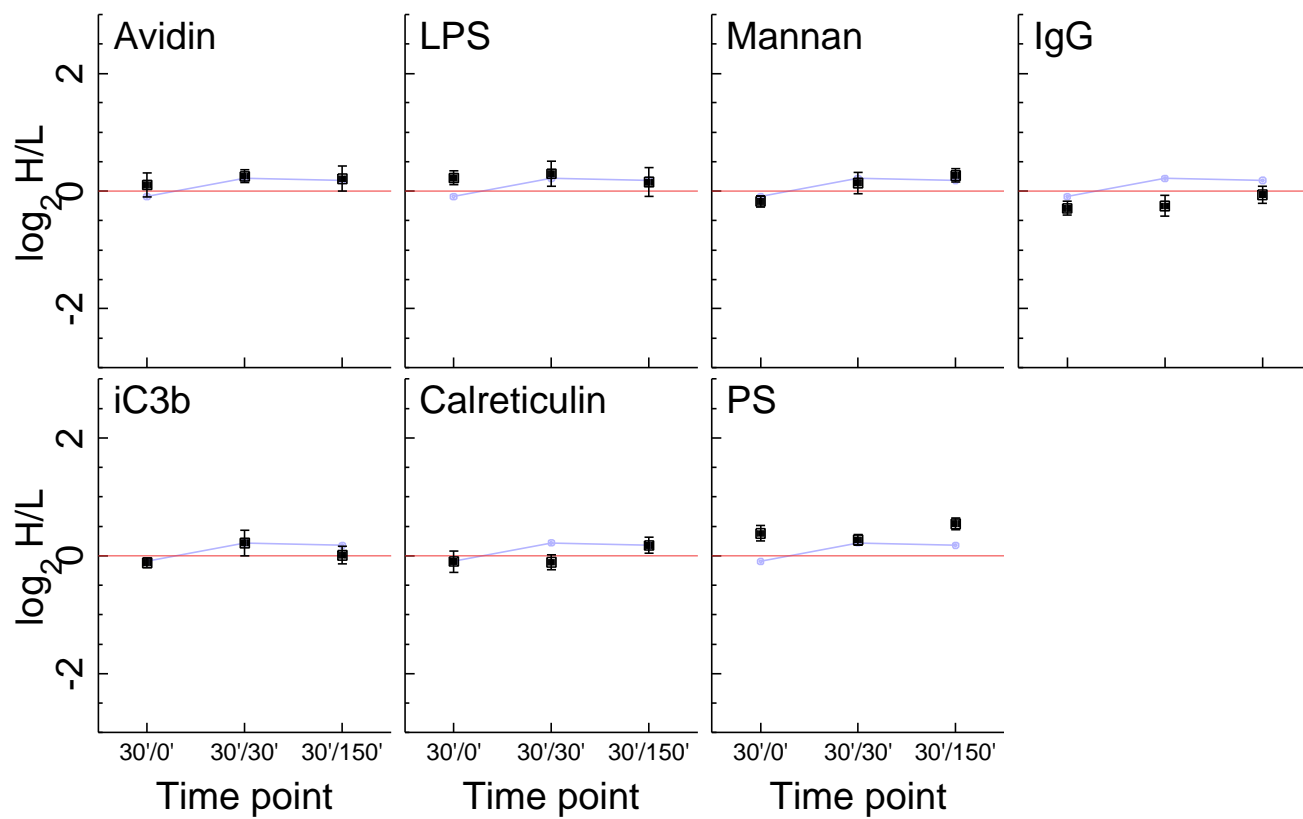

commd2 (Q8BXC6)

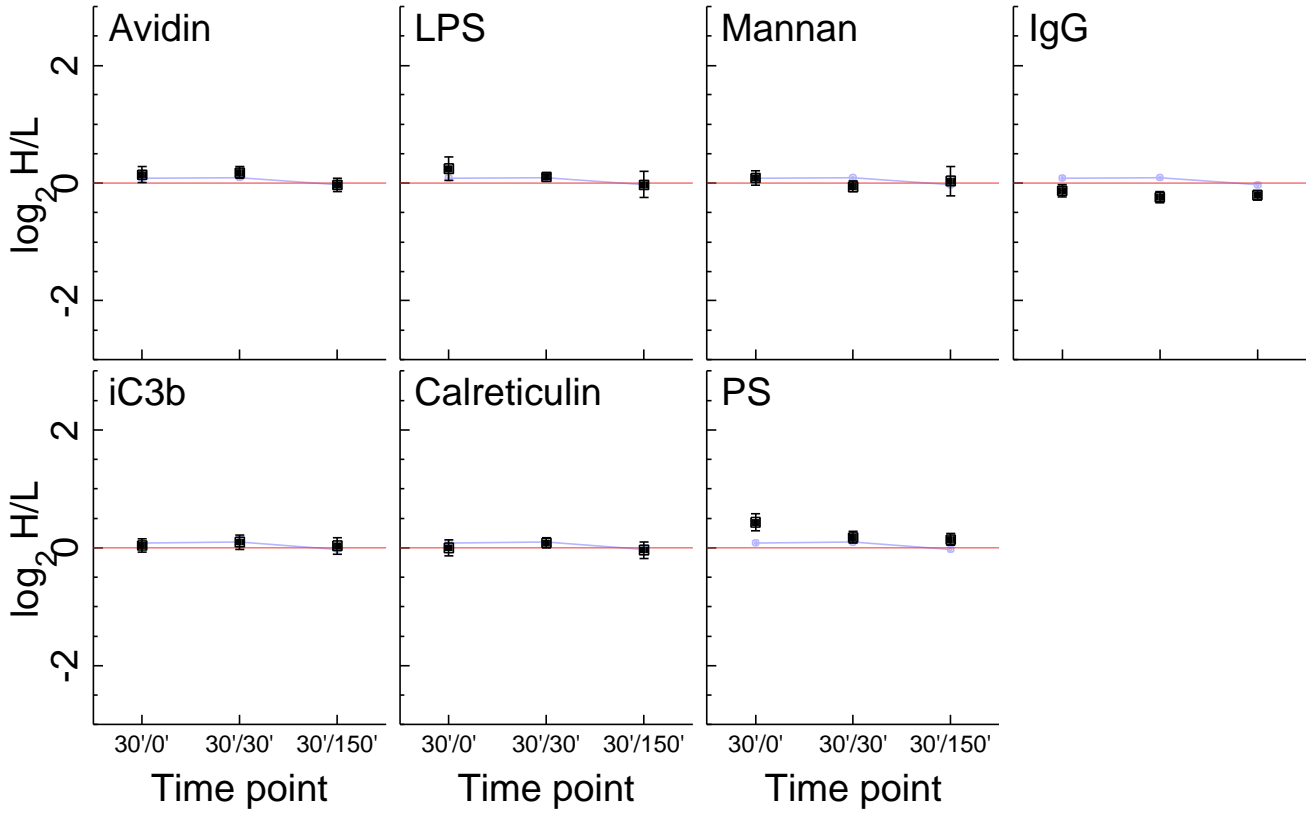

commd3 (Q63829)

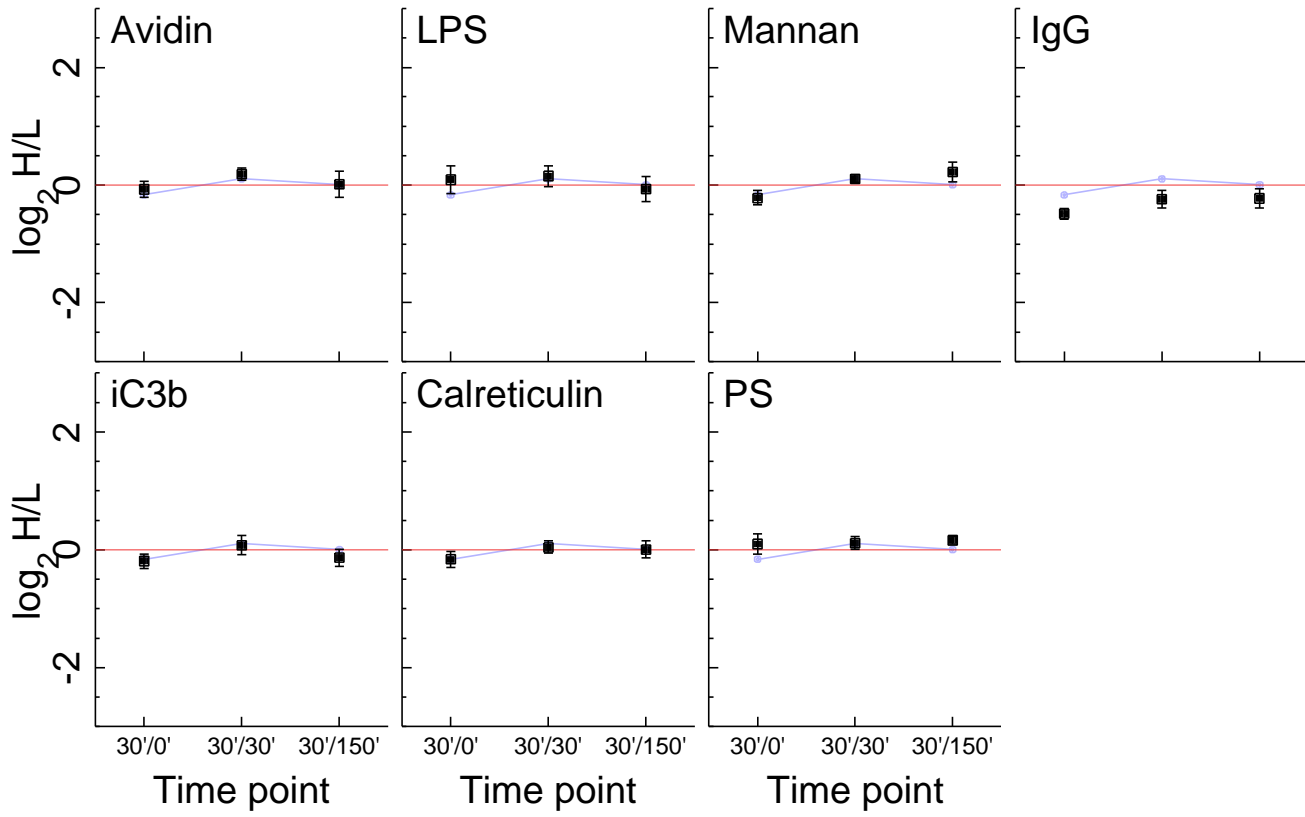

commd4 (Q9CQ02)

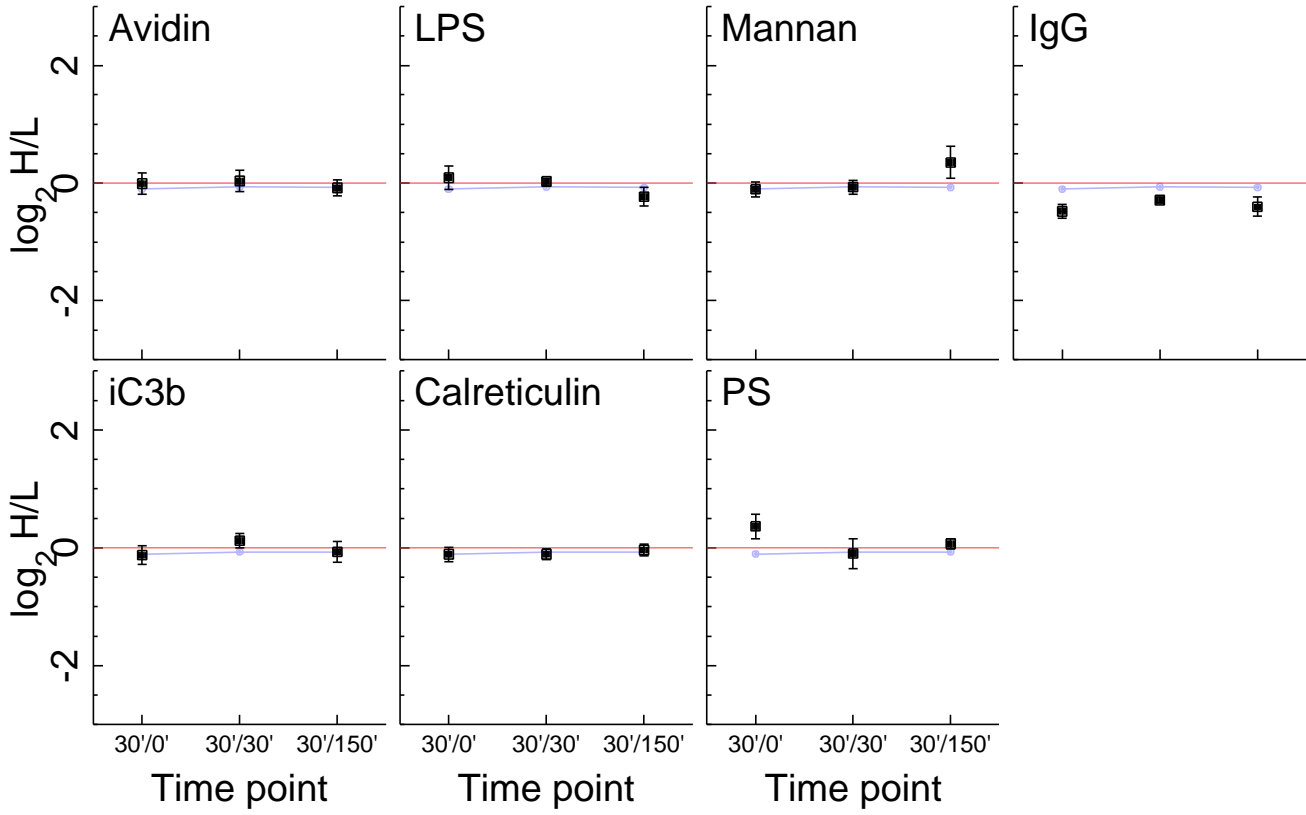

### commd5 (Q8R395)

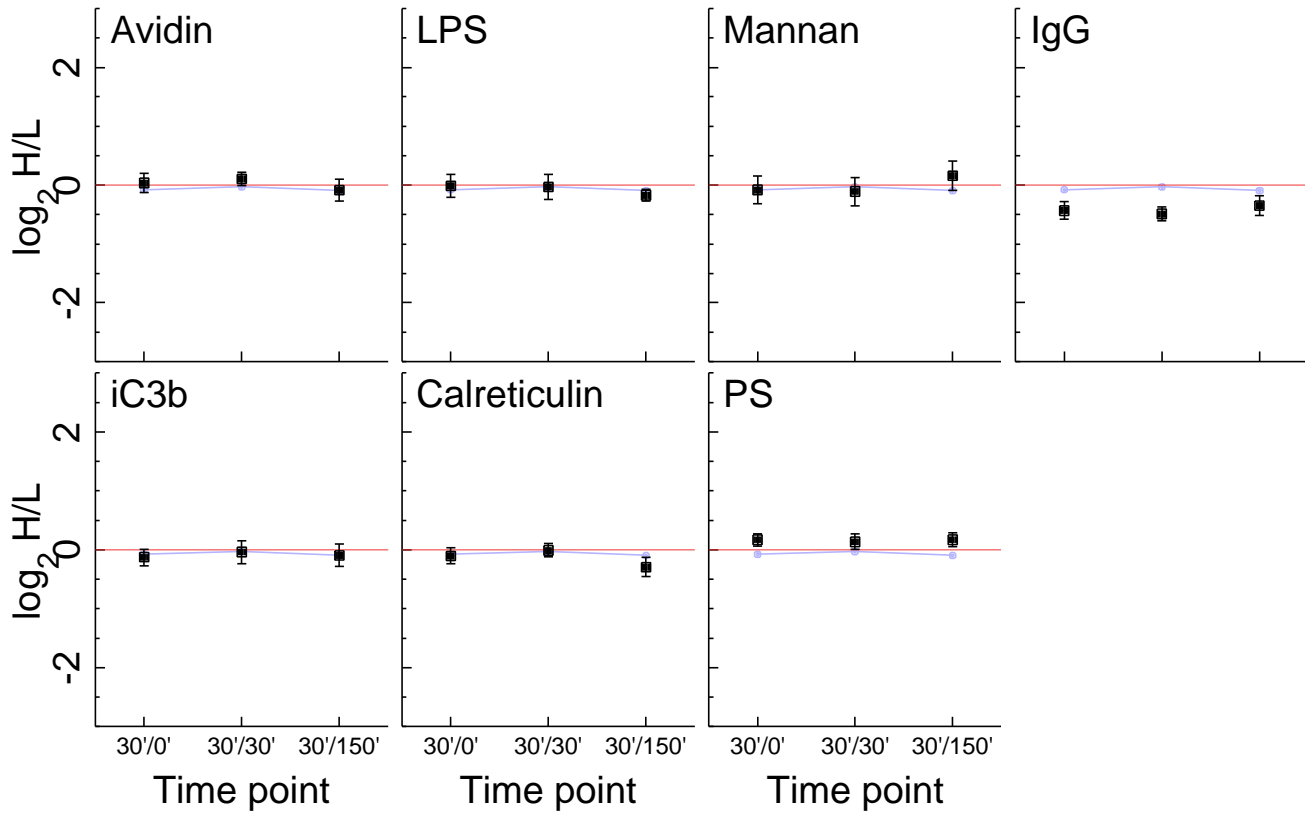

### commd6 (Q3V4B5)

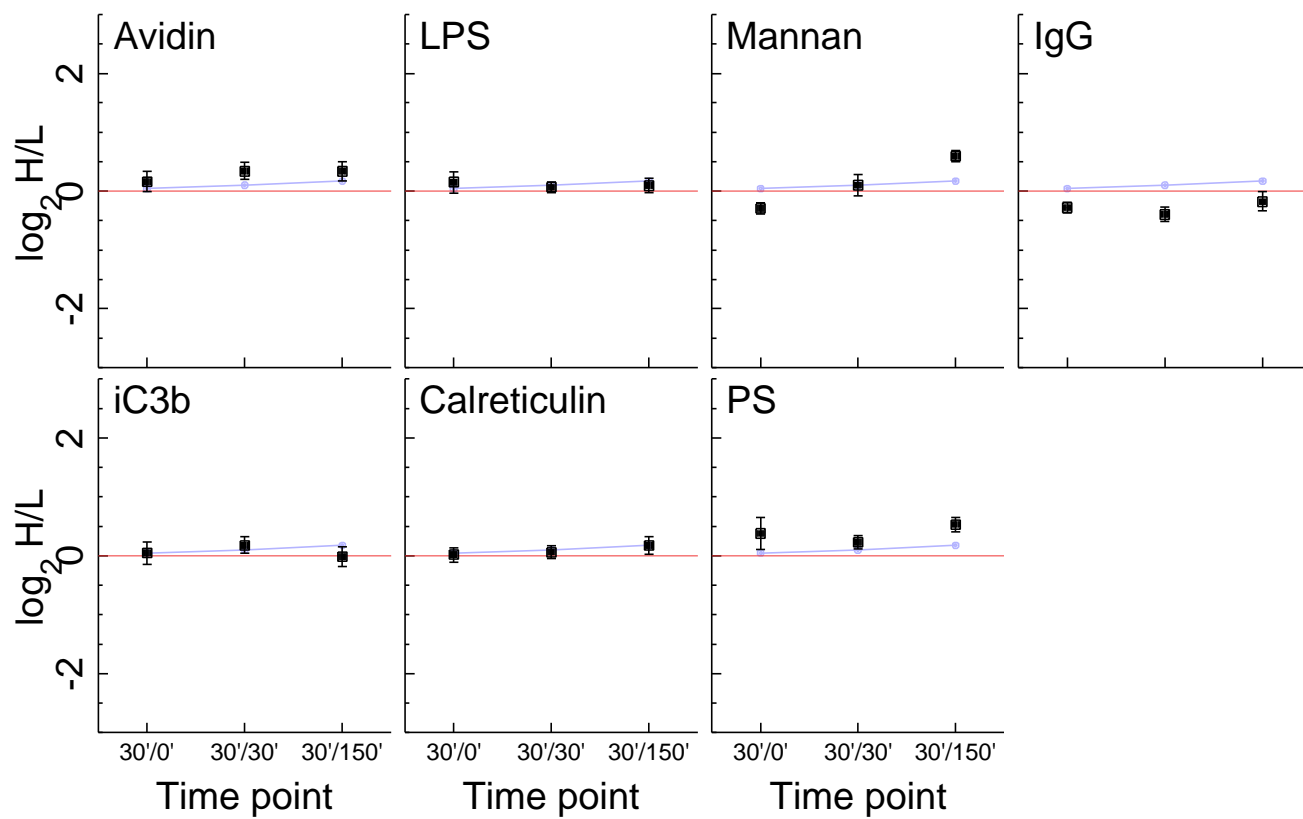

commd7 (Q8BG94)

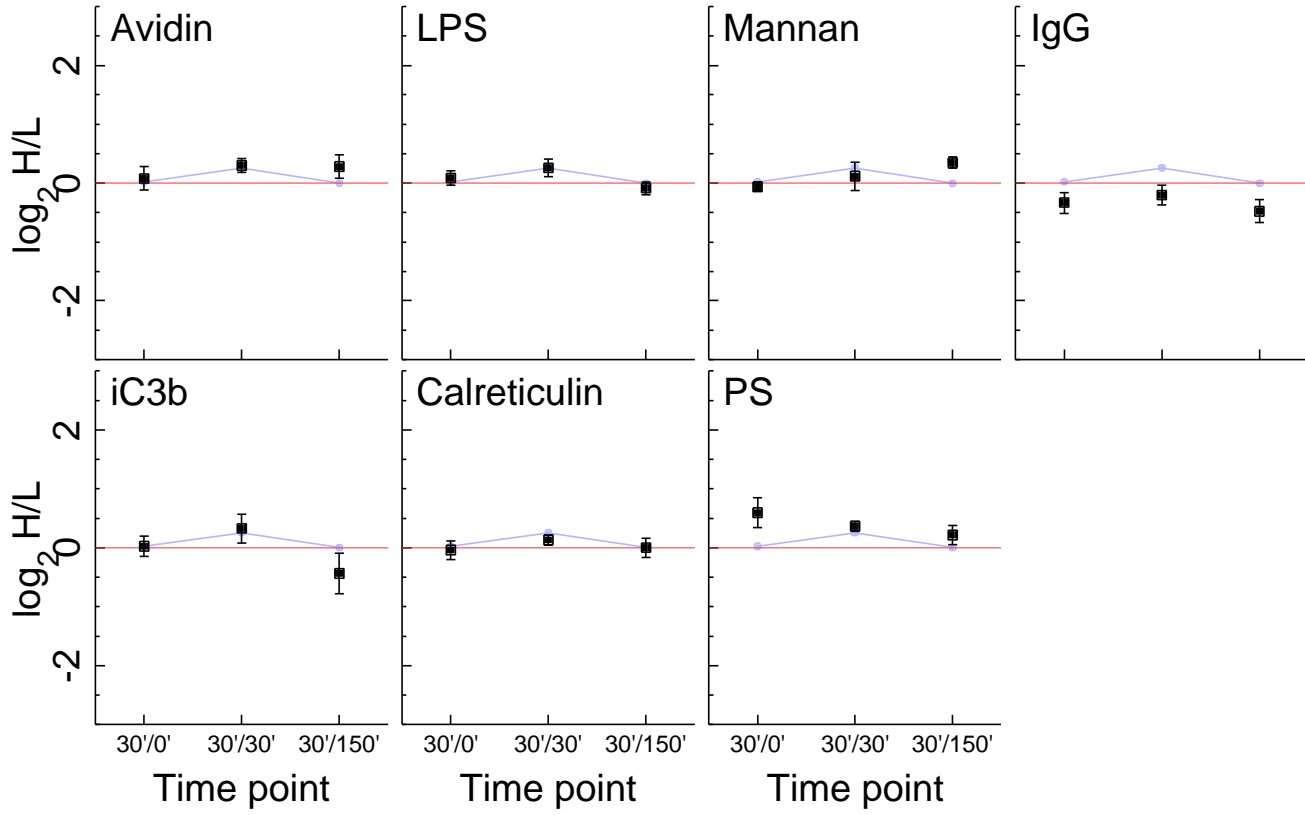



commd8 (Q9CZG3)

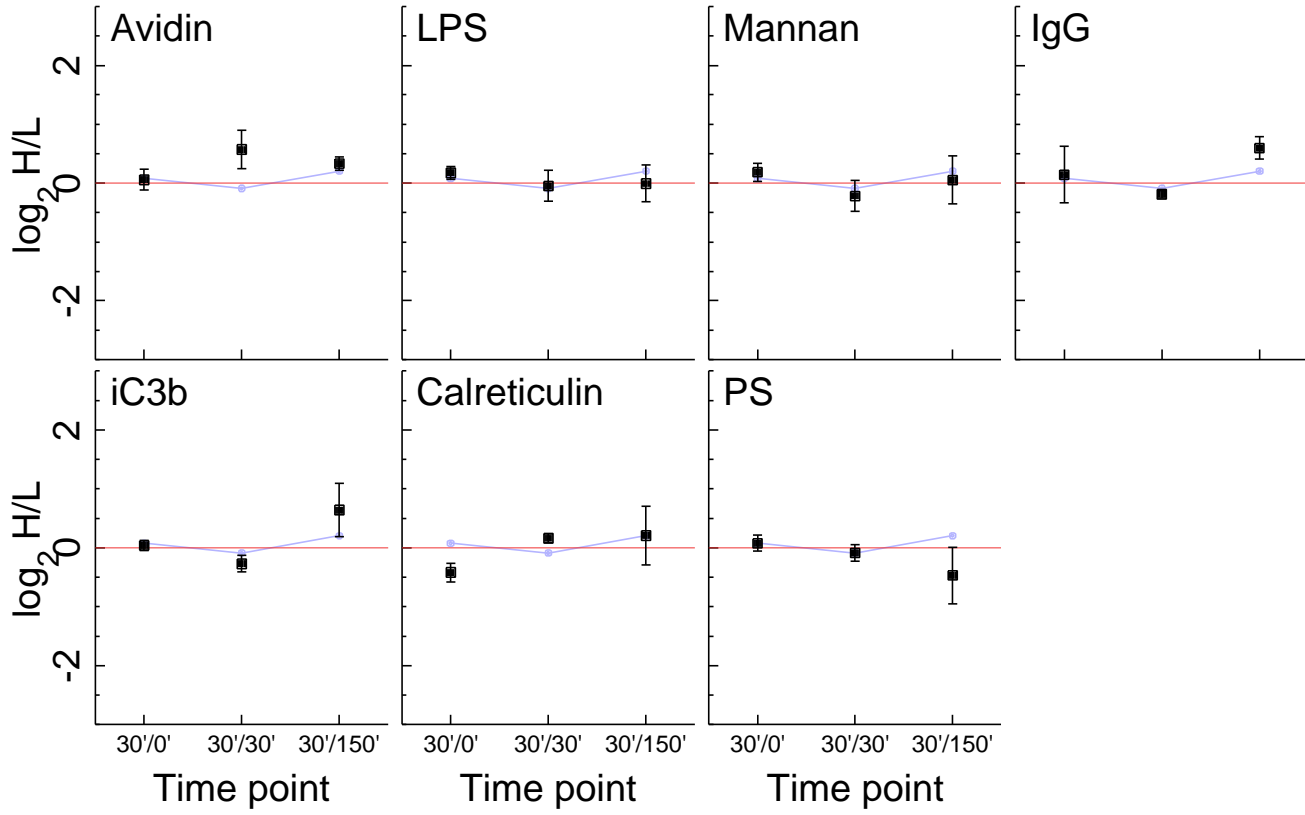

commd9 (Q8K2Q0)

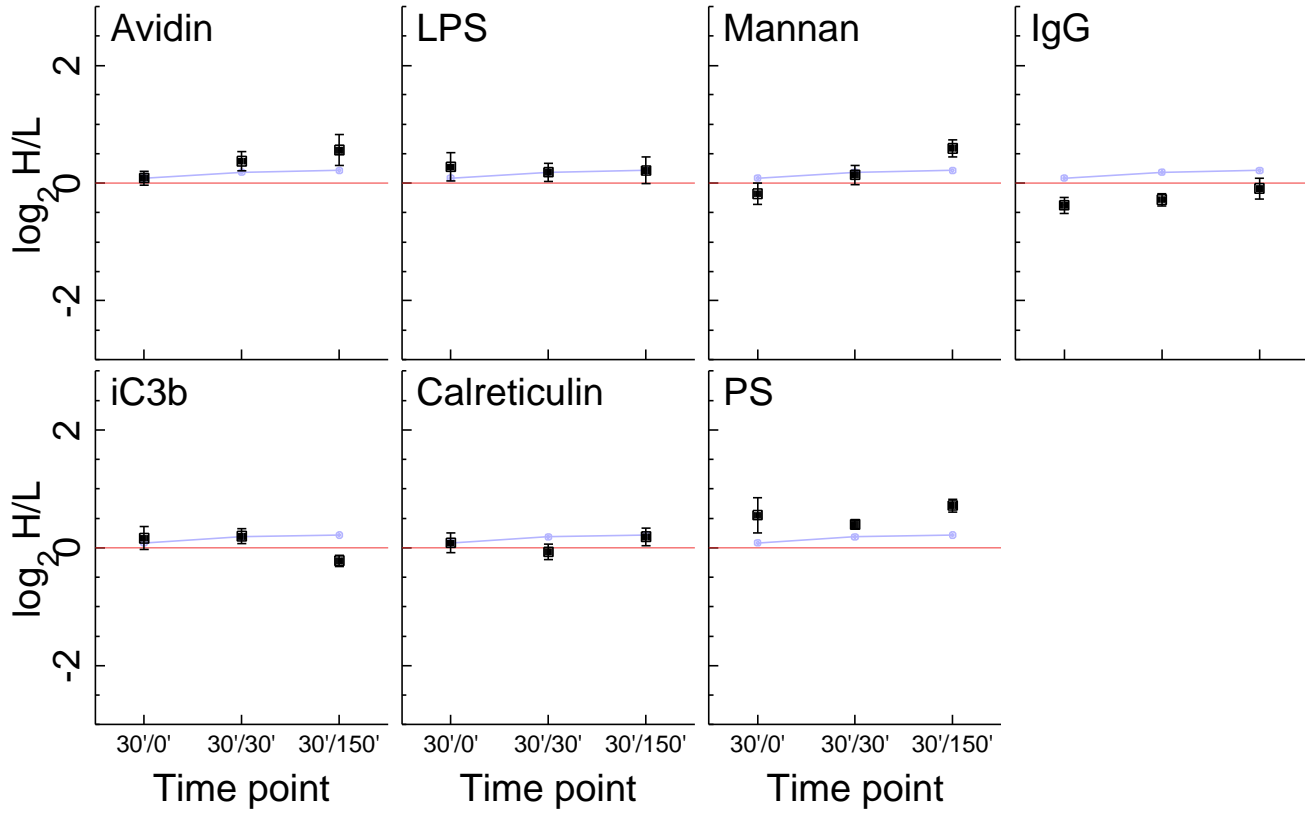

comt (O88587)

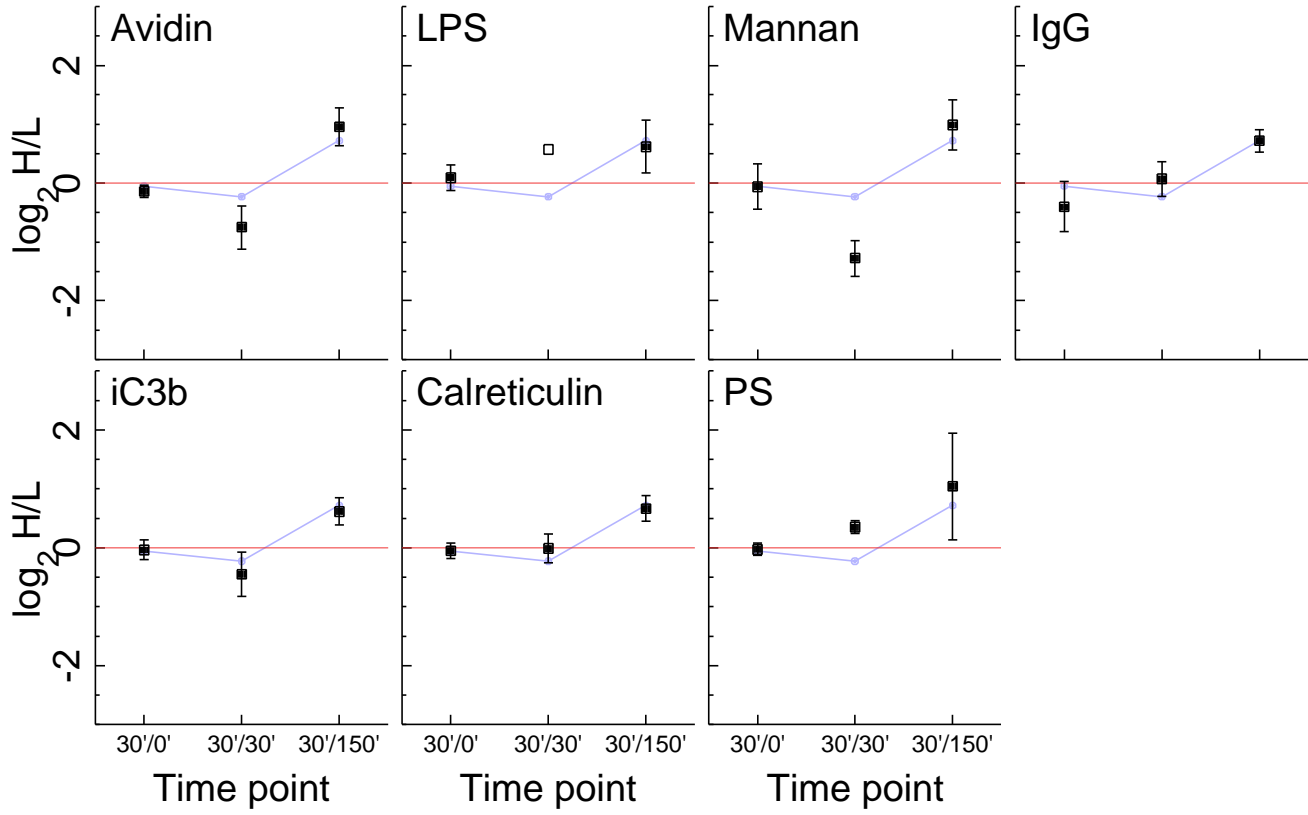

copb2 (O55029)

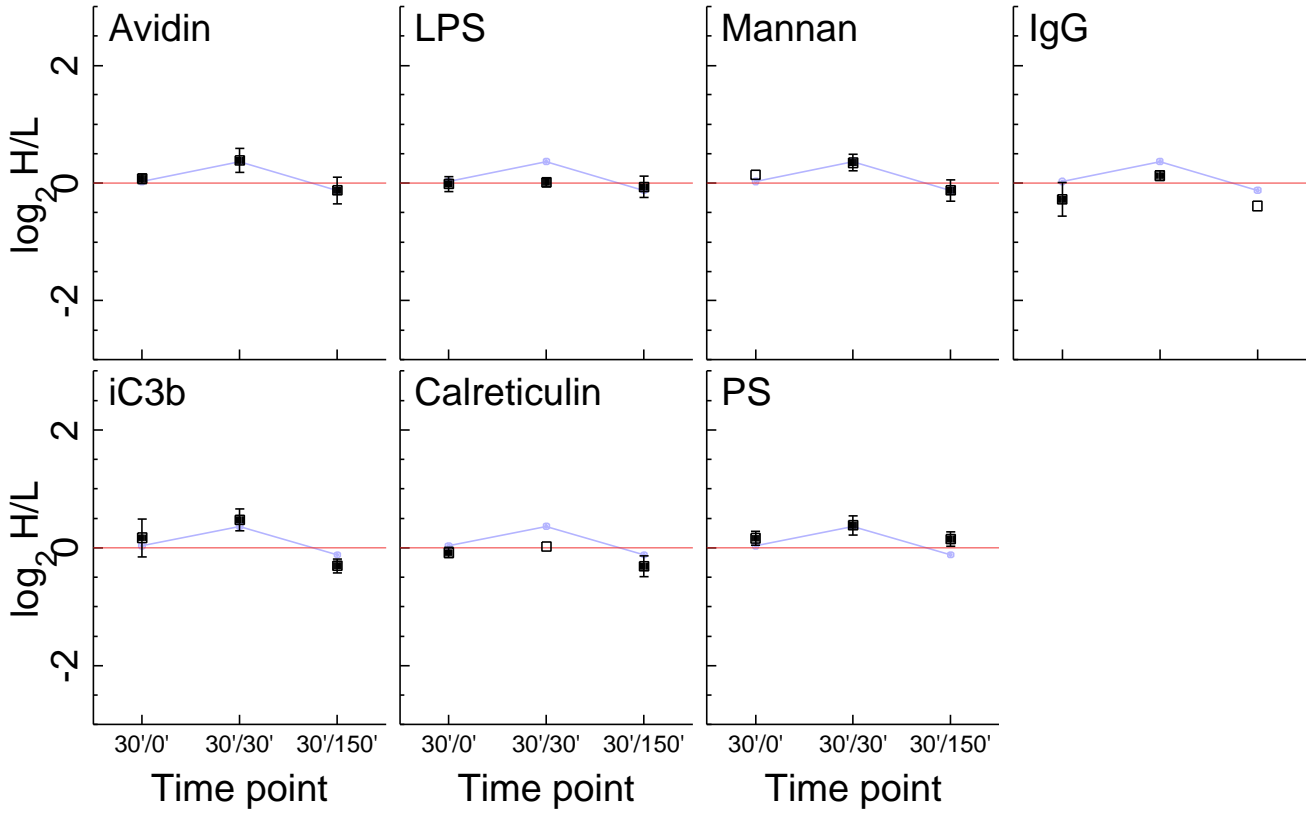

coro1a (O89053)

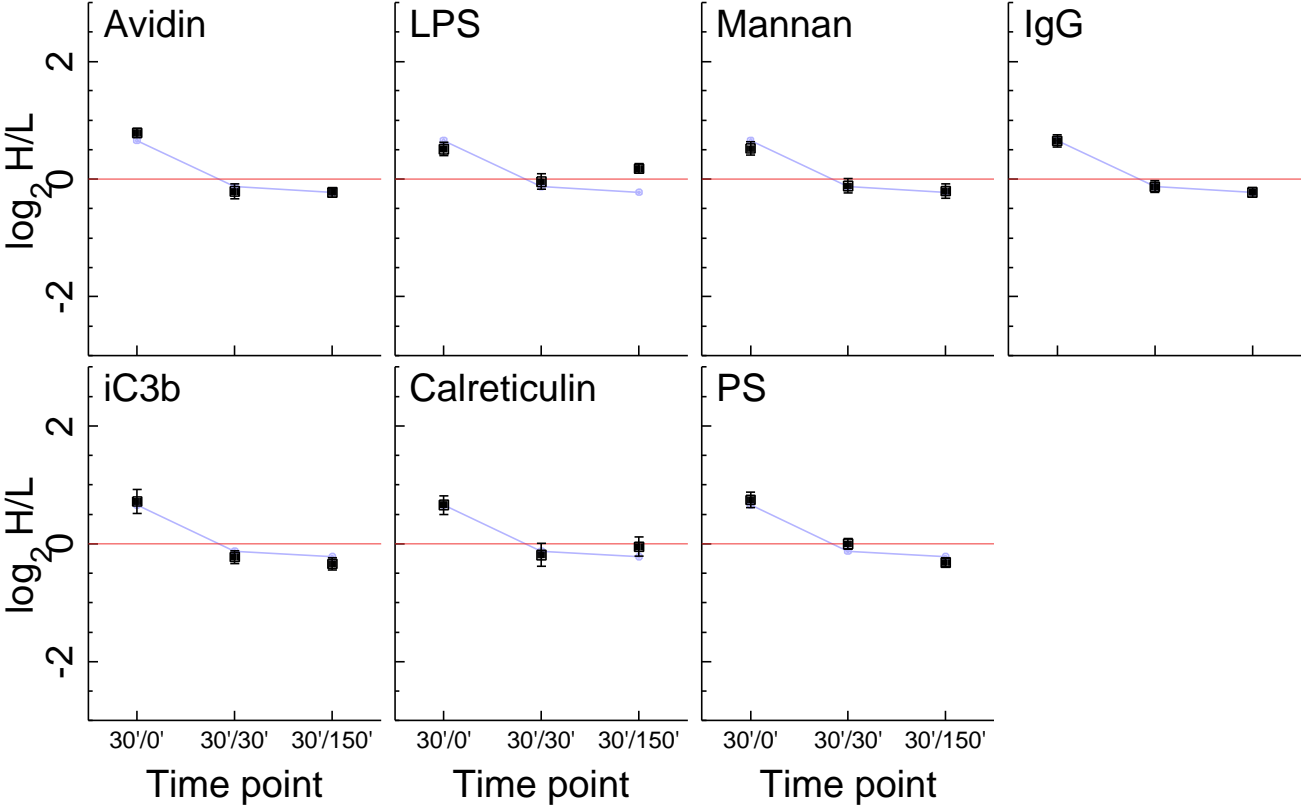

coro1c (Q9WUM4)

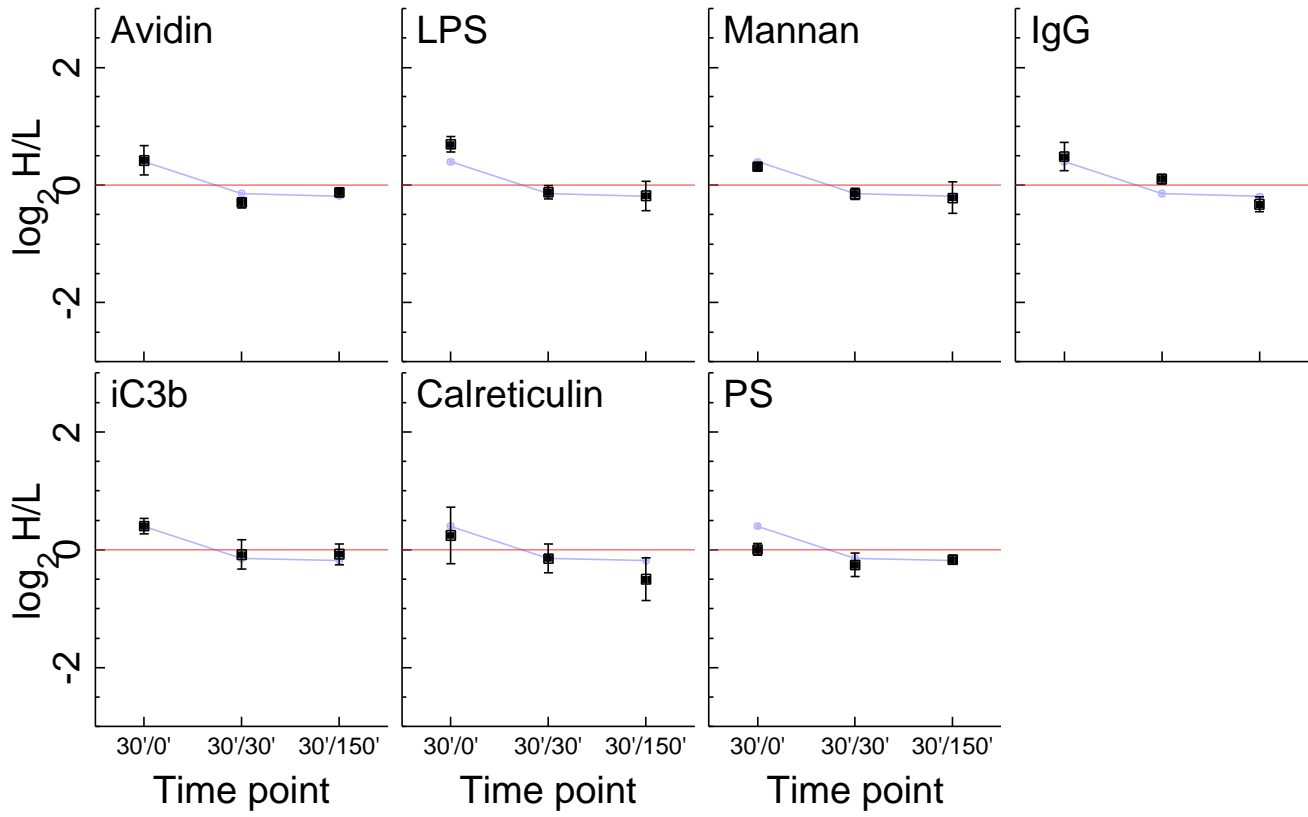

### coro2a (B1AVH5)

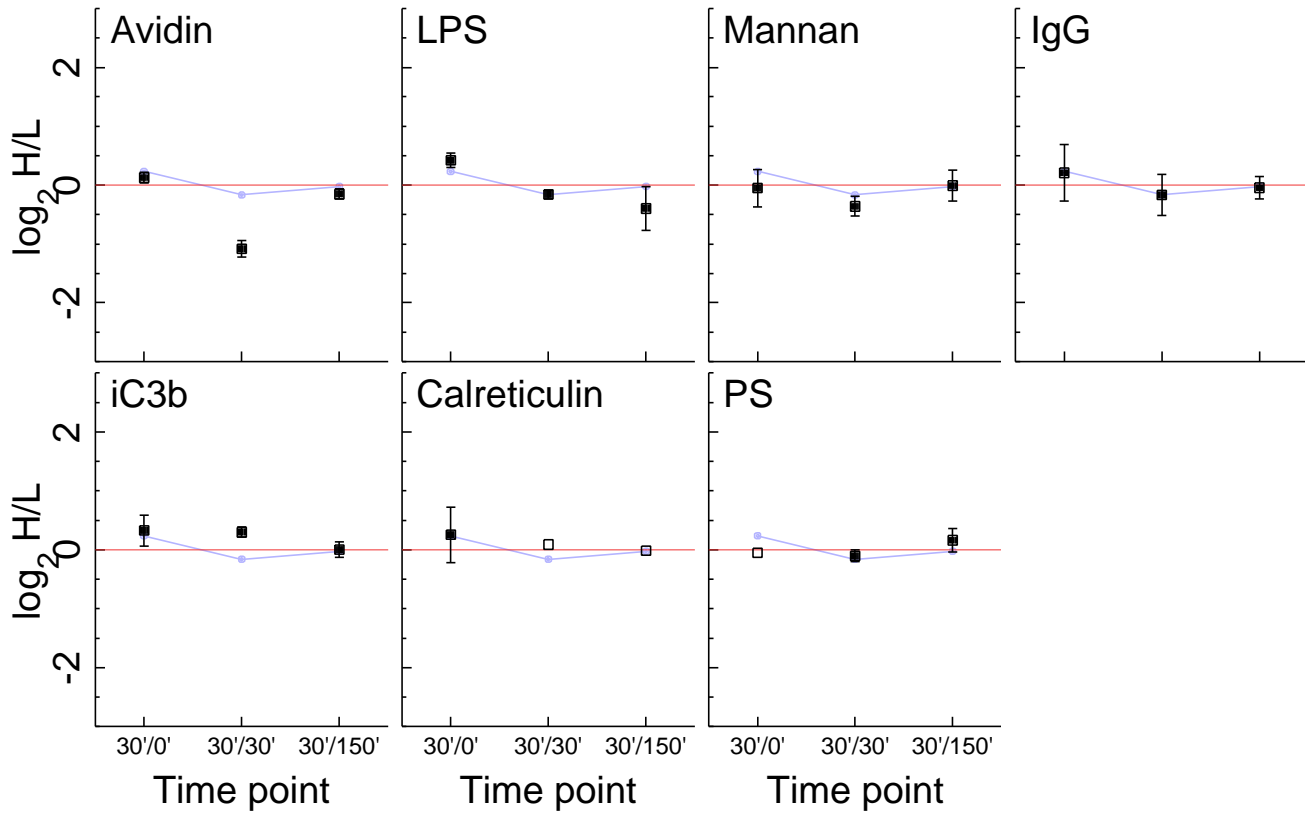

cot11 (Q9CQI6)

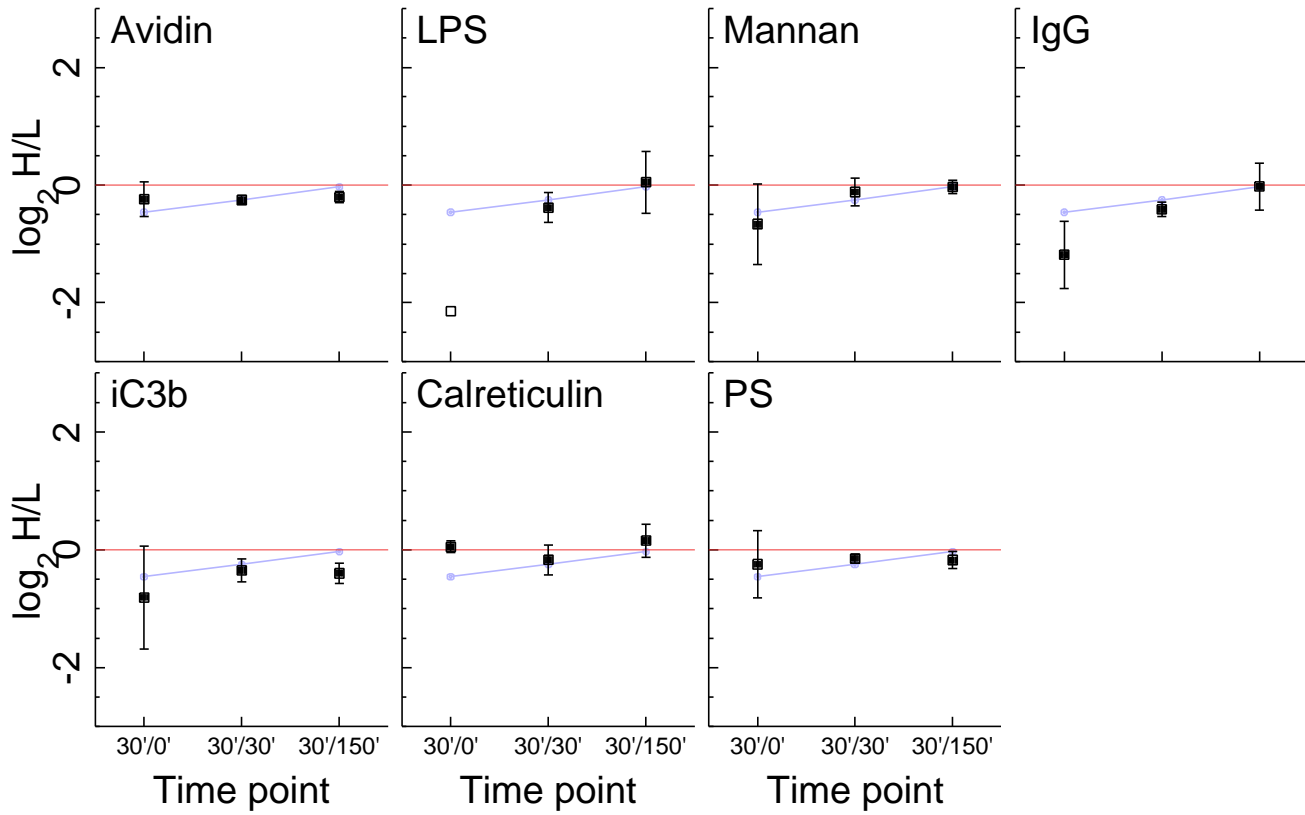



### cox4i1 (P19783)

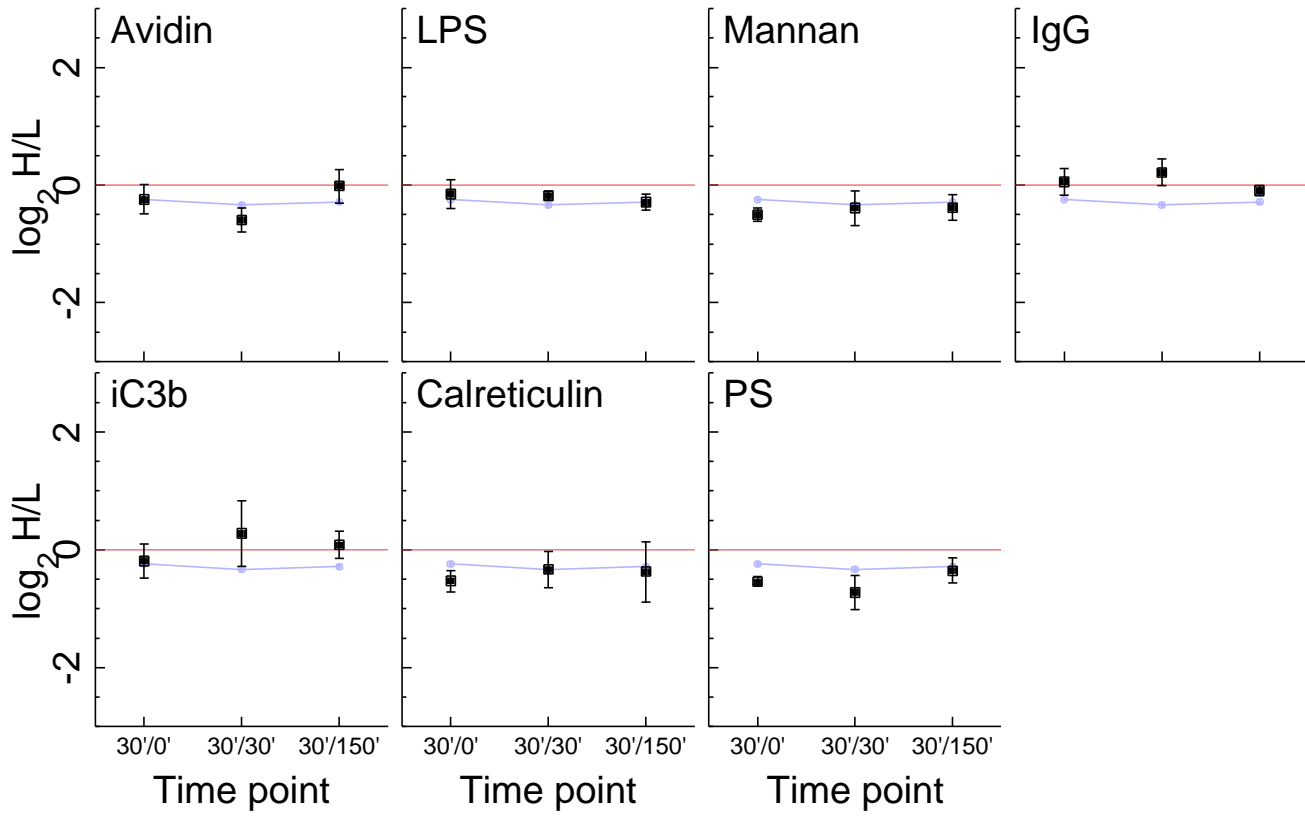

### cox4nb (O70378)

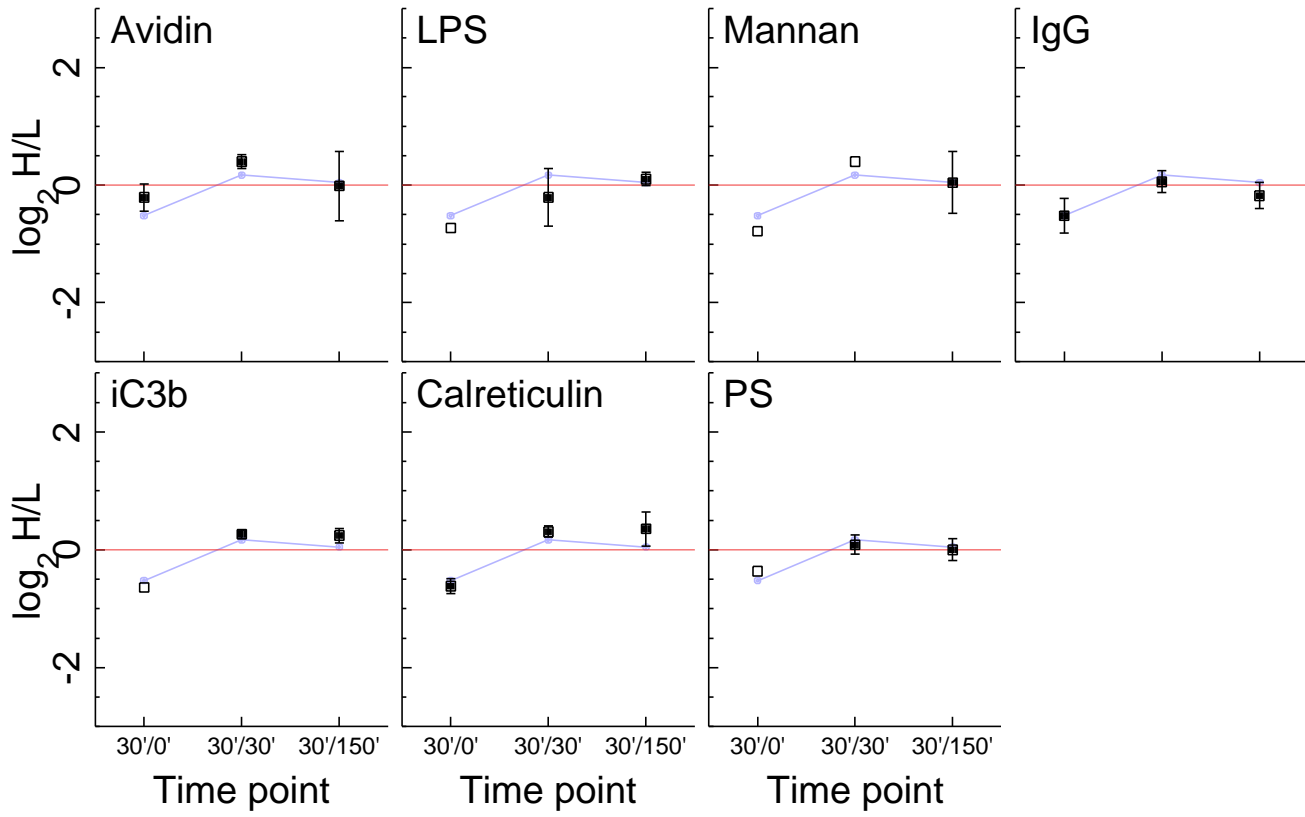

cox5a (P12787)

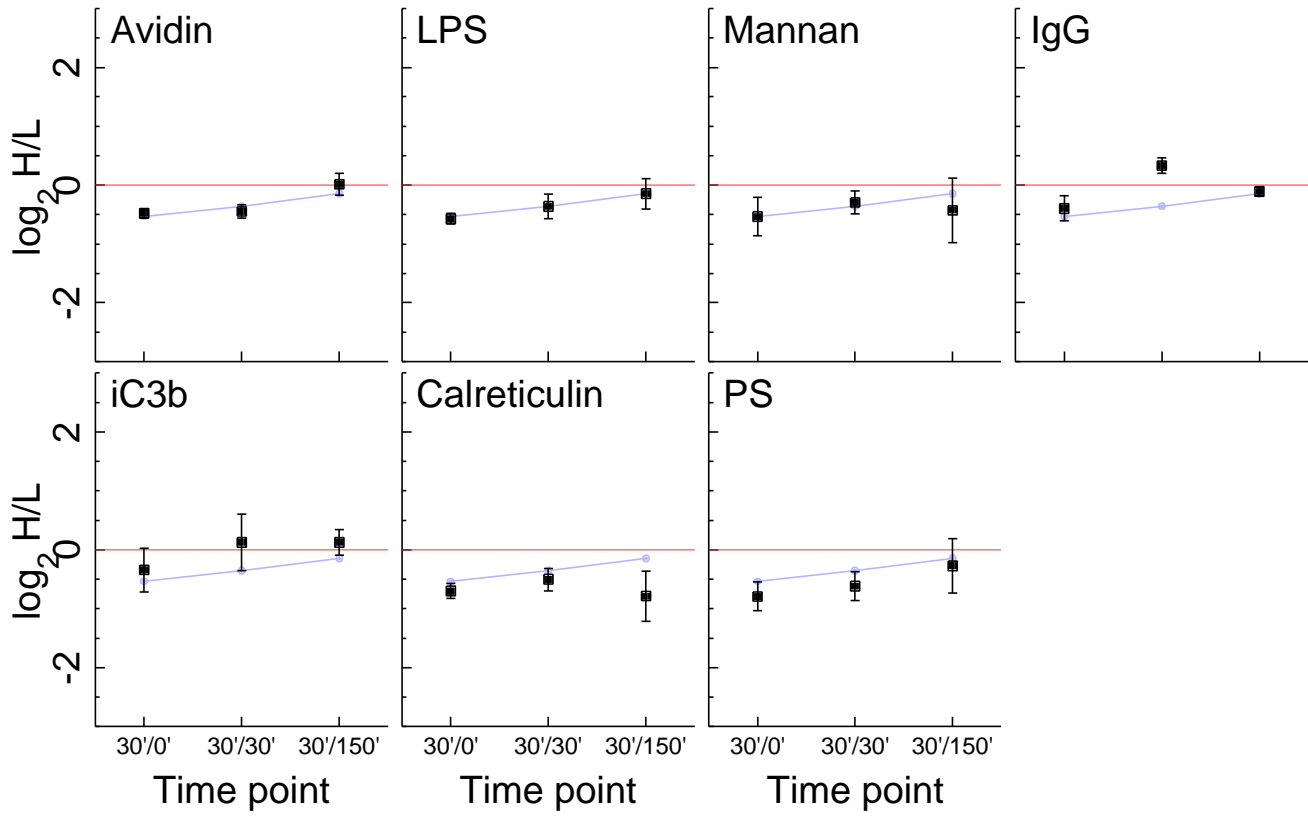

cox5b (Q9D881)

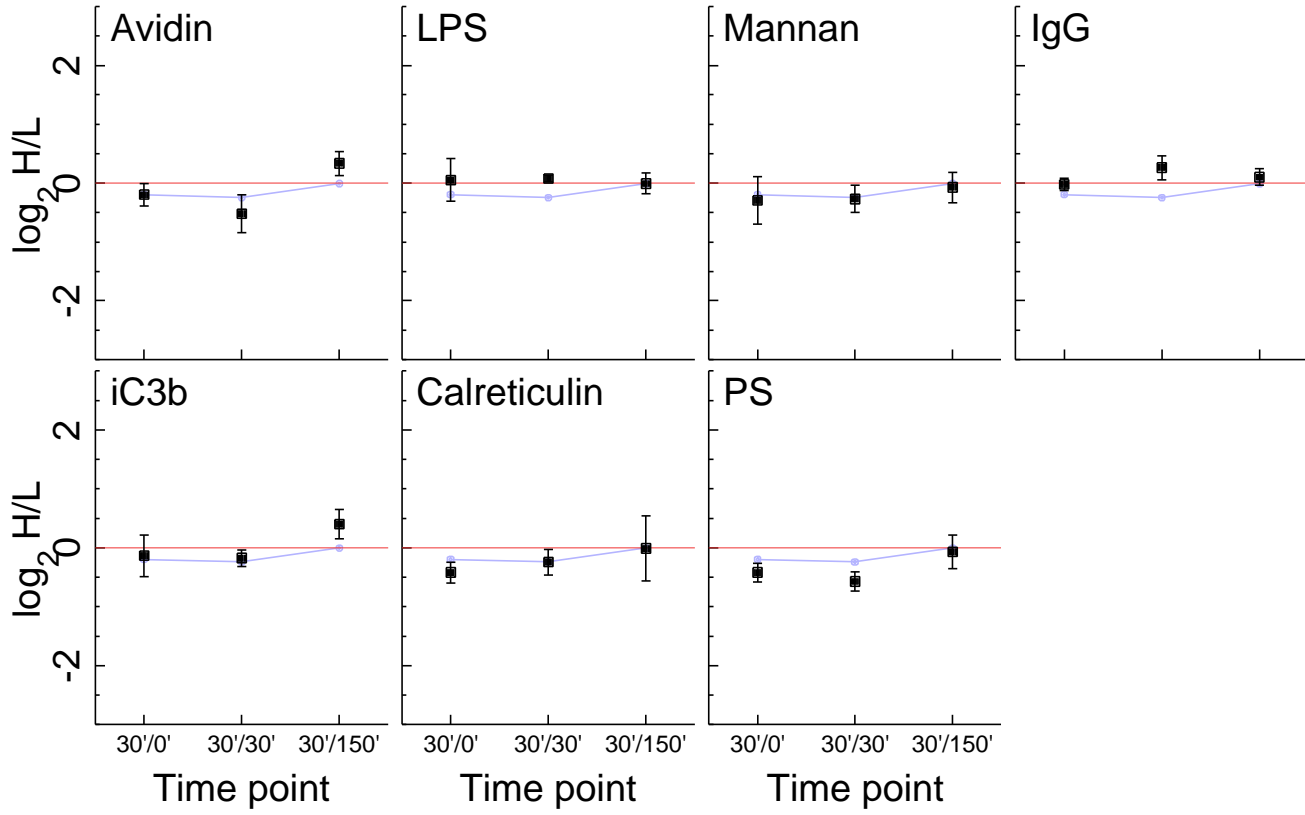

### cox6a1 (Q9DCW5)

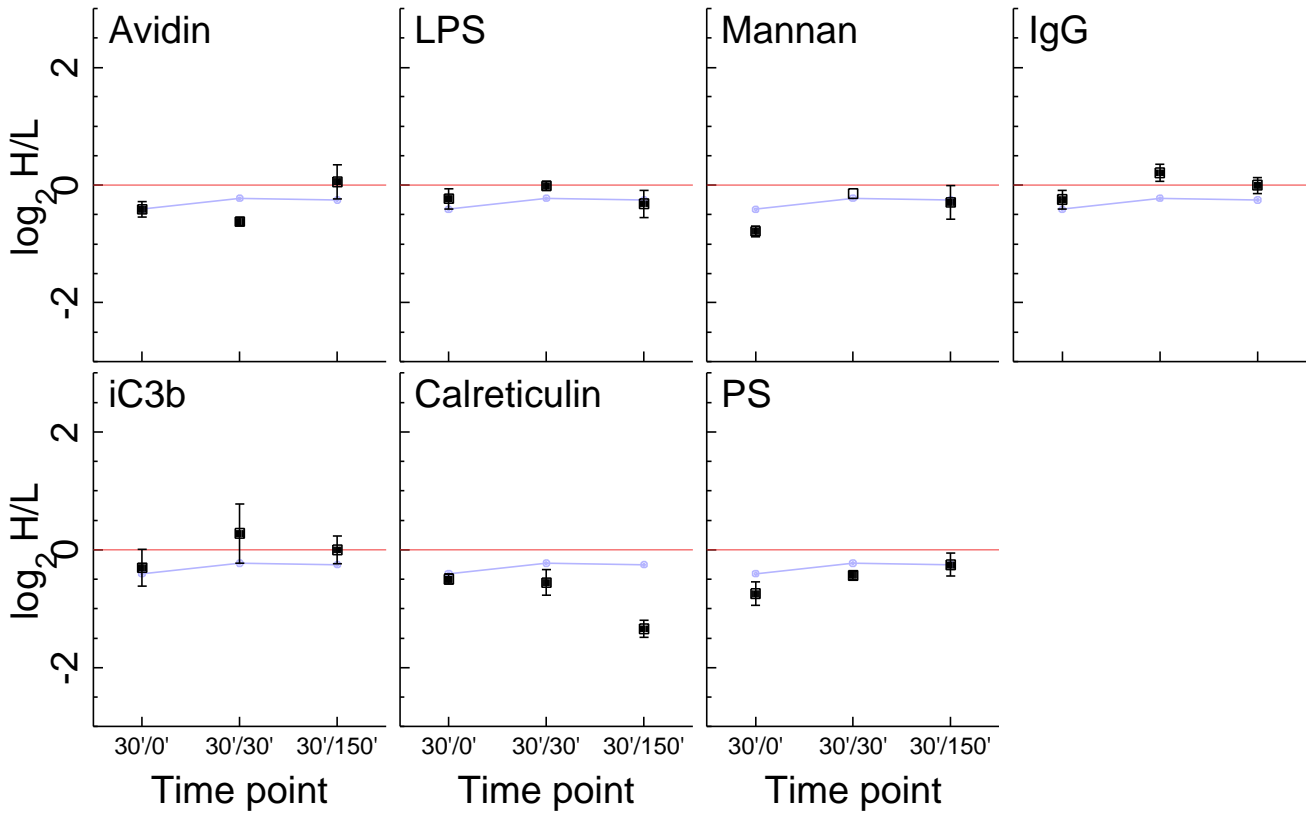

### cox6b1 (P56391)

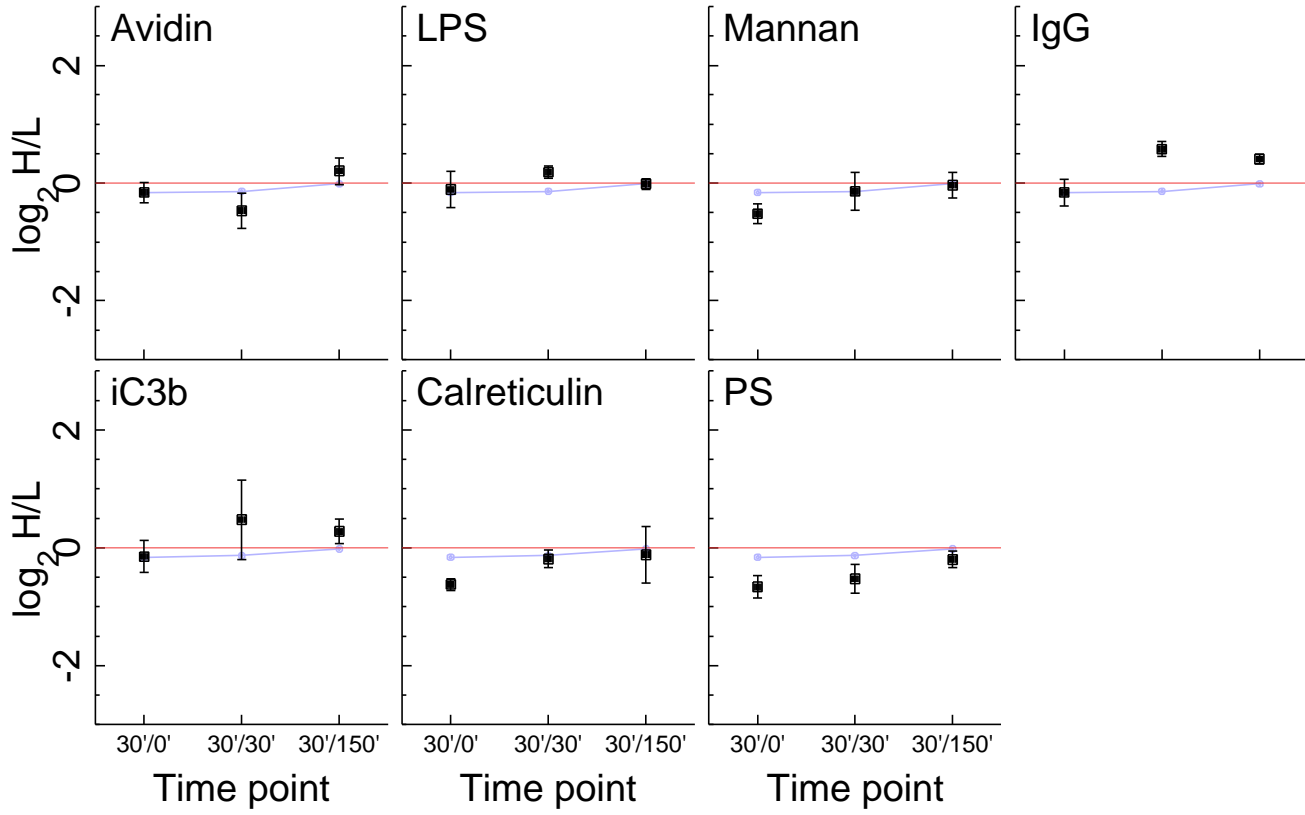

cox6c (Q9CPQ1)

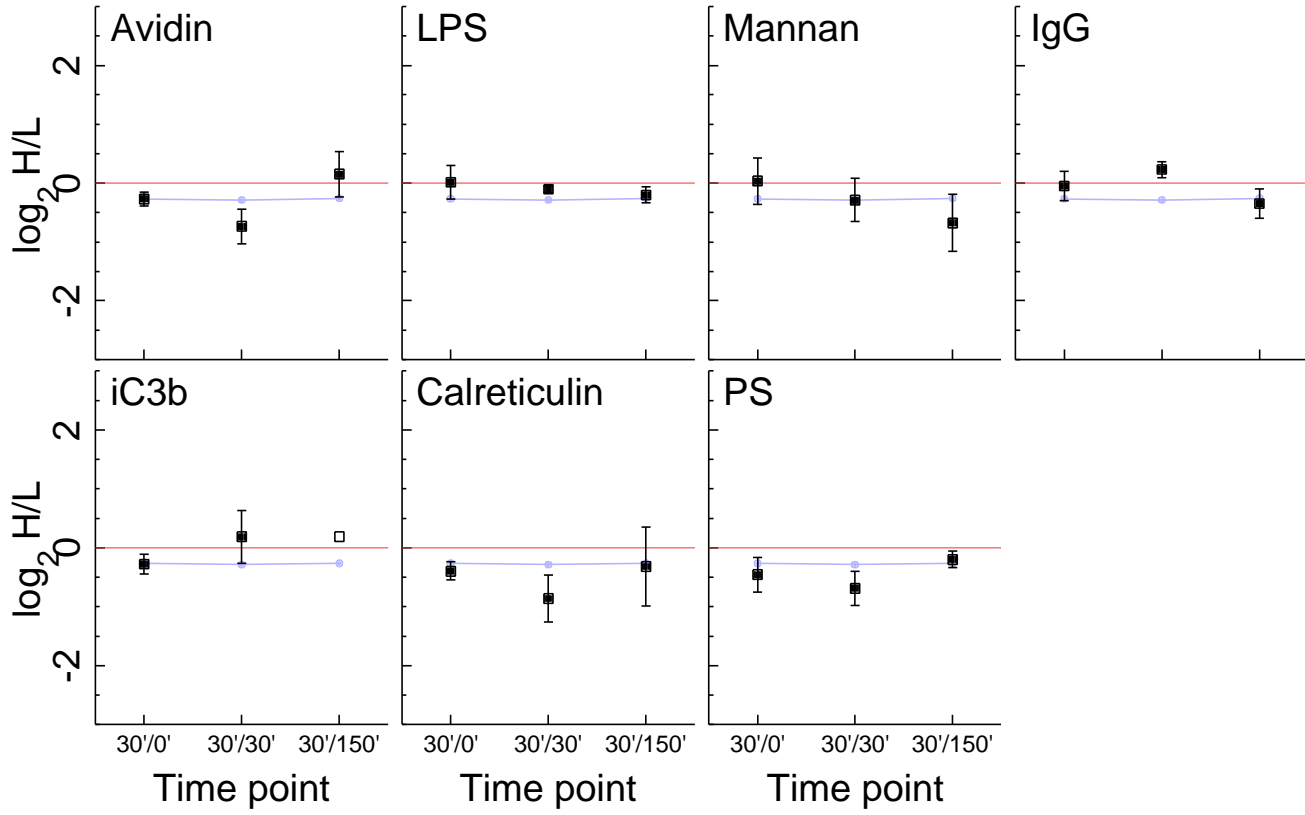

cox7a2 (P48771)

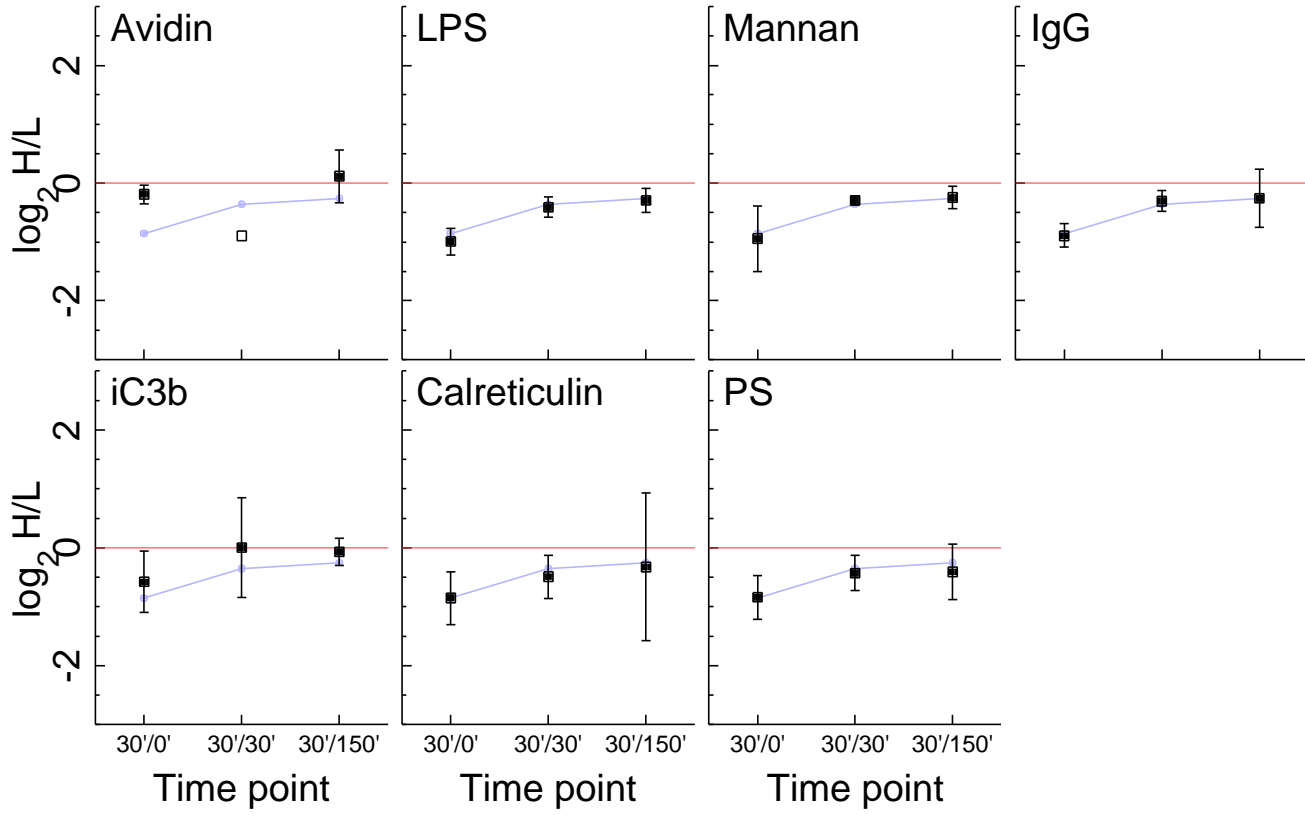



### cox7c (P17665)

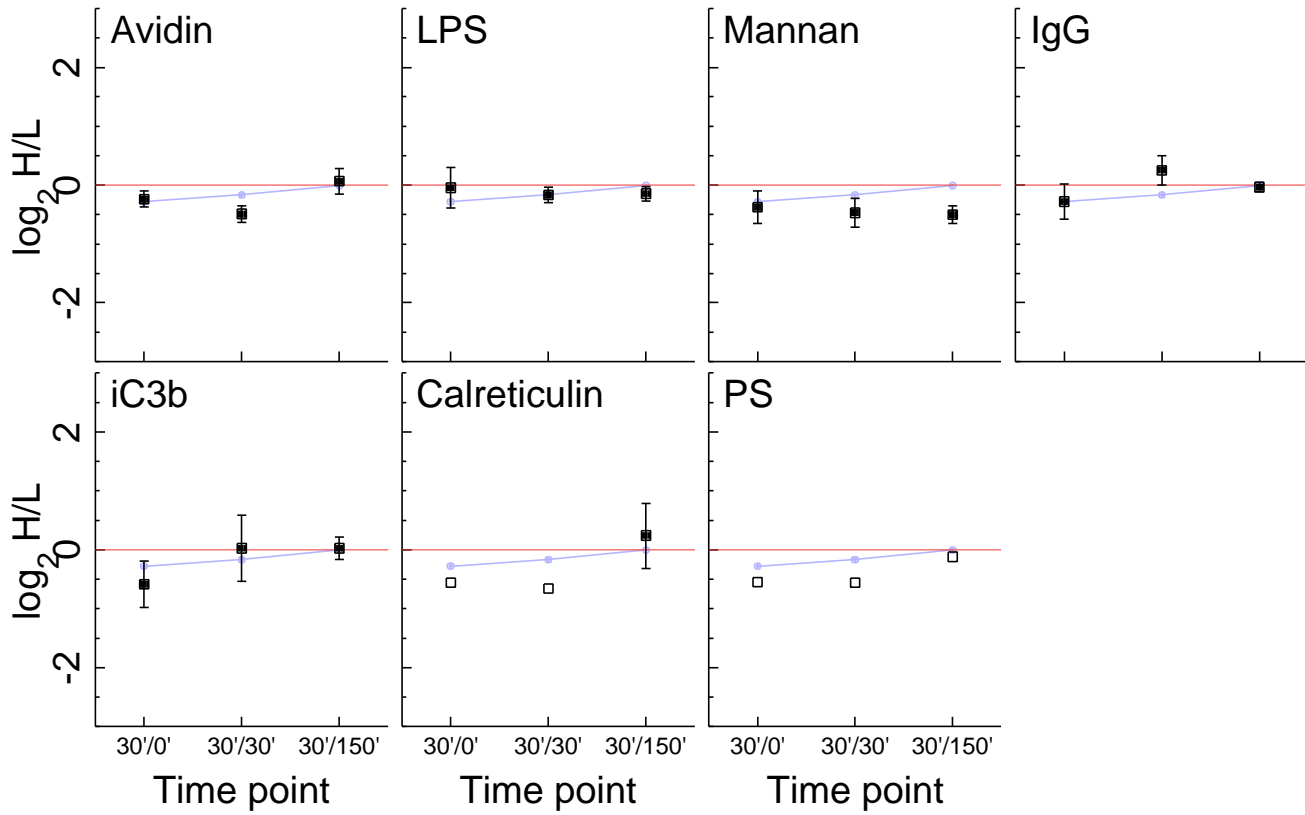

cpd (O89001)

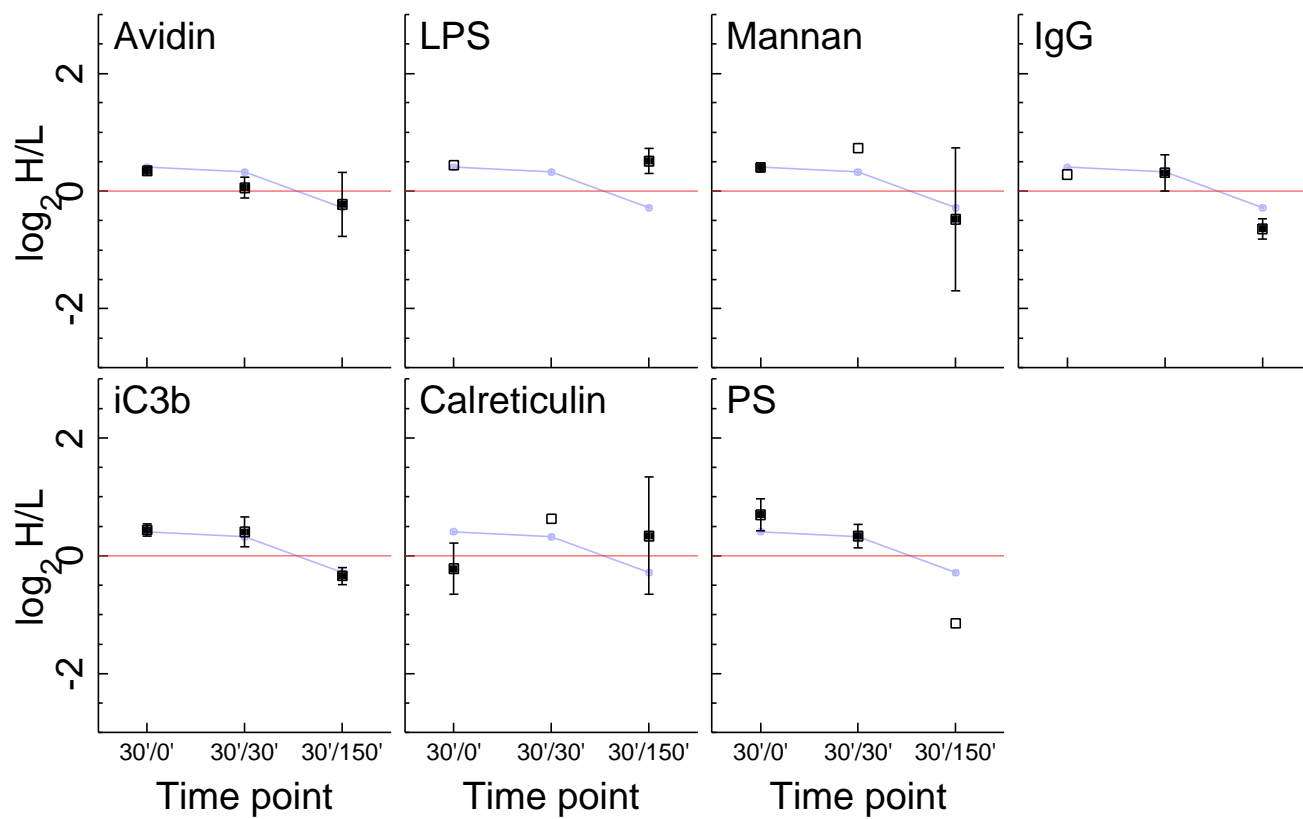

cpne1 (Q8C166)

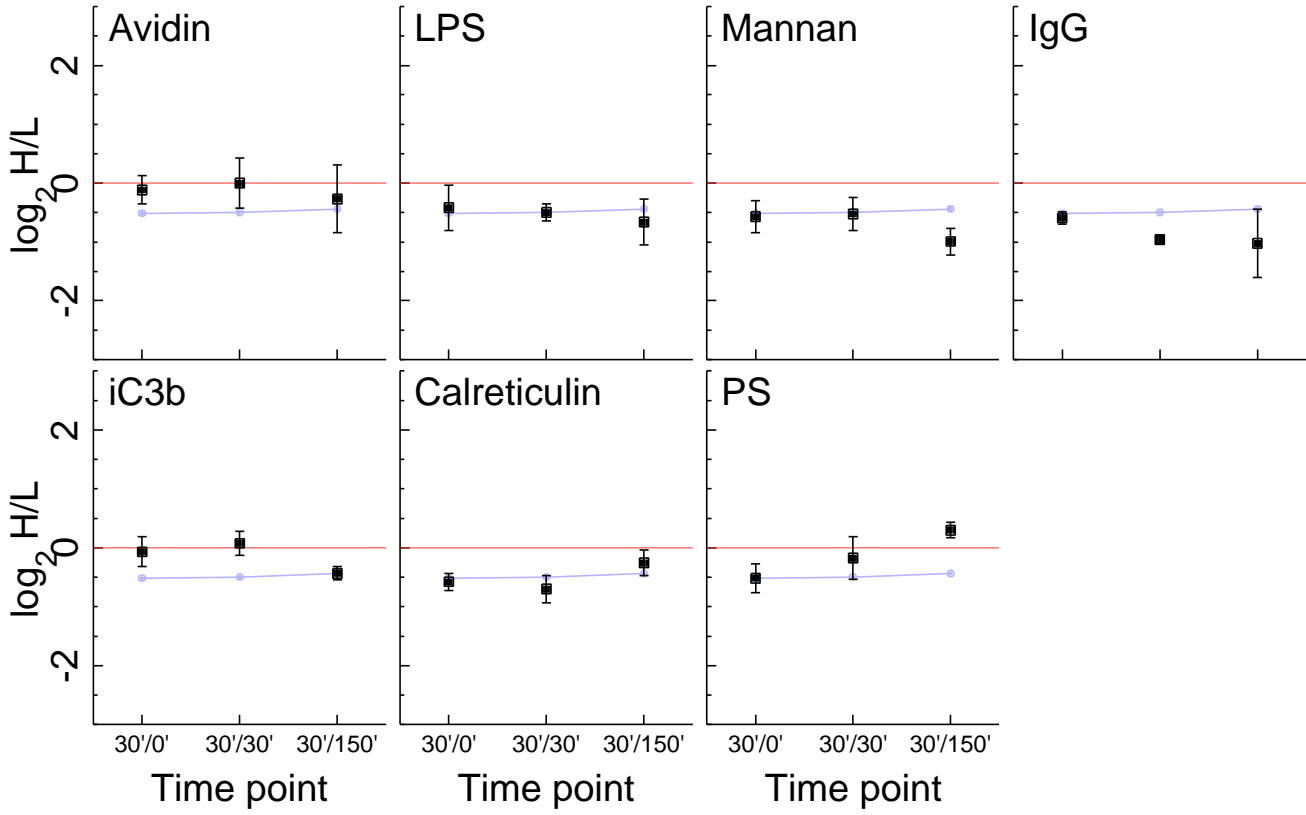

cpne2 (P59108)

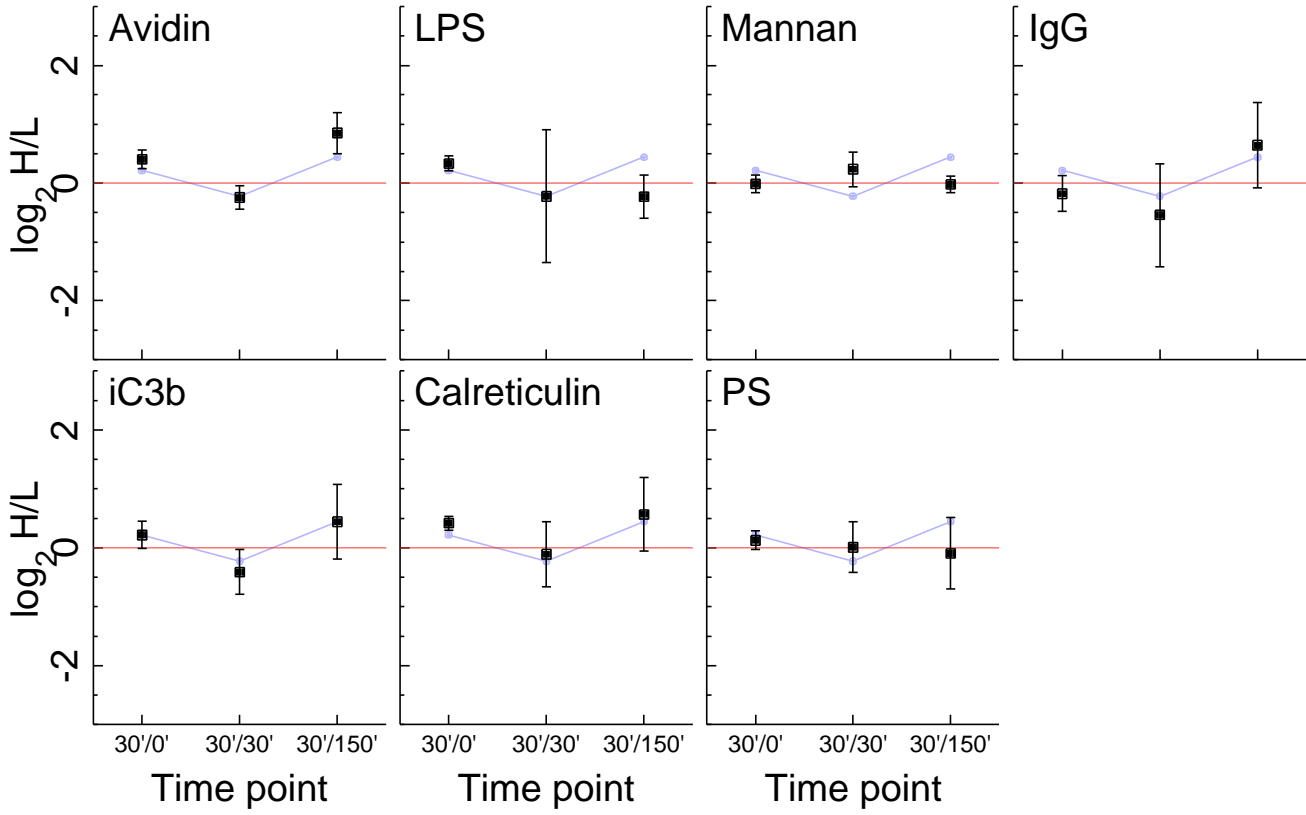

### cpne3 (Q8BT60)

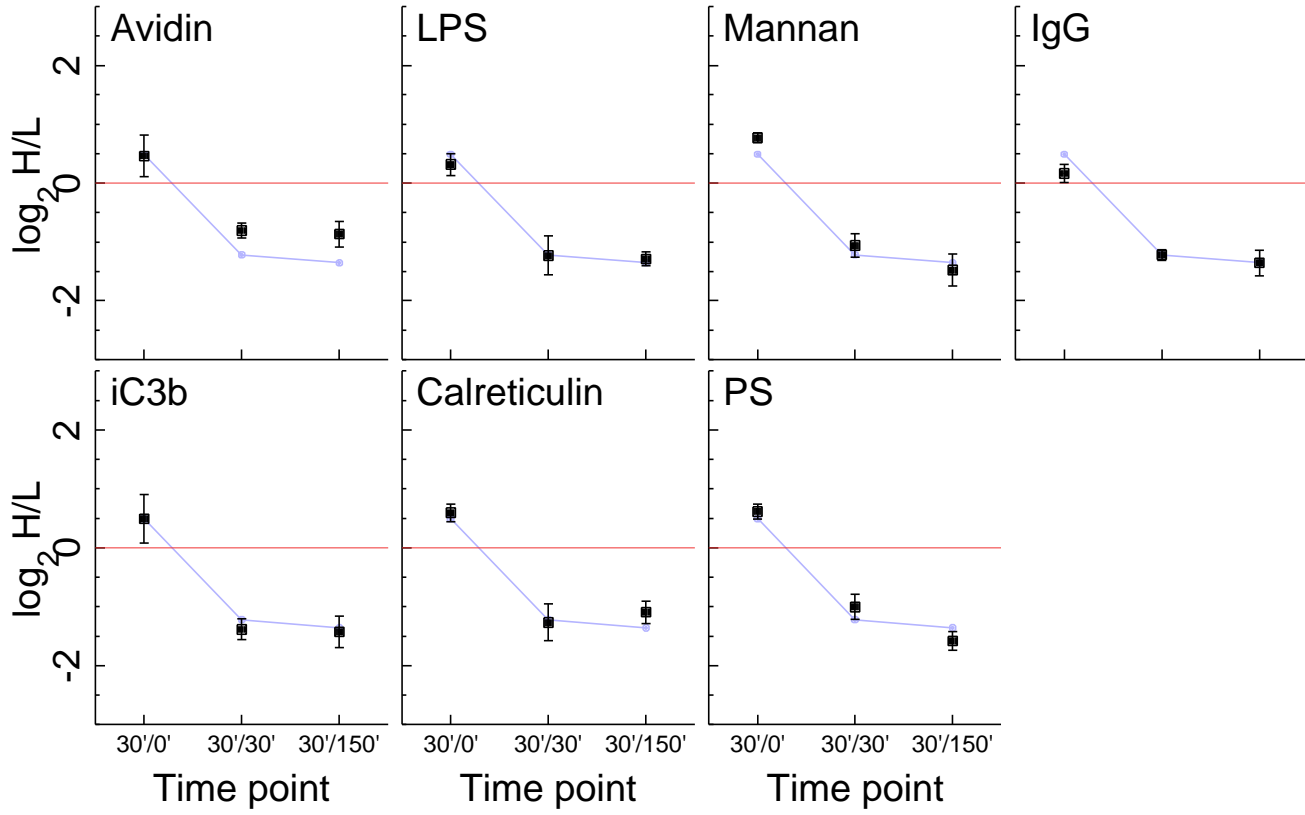

cpq (Q9WVJ3)

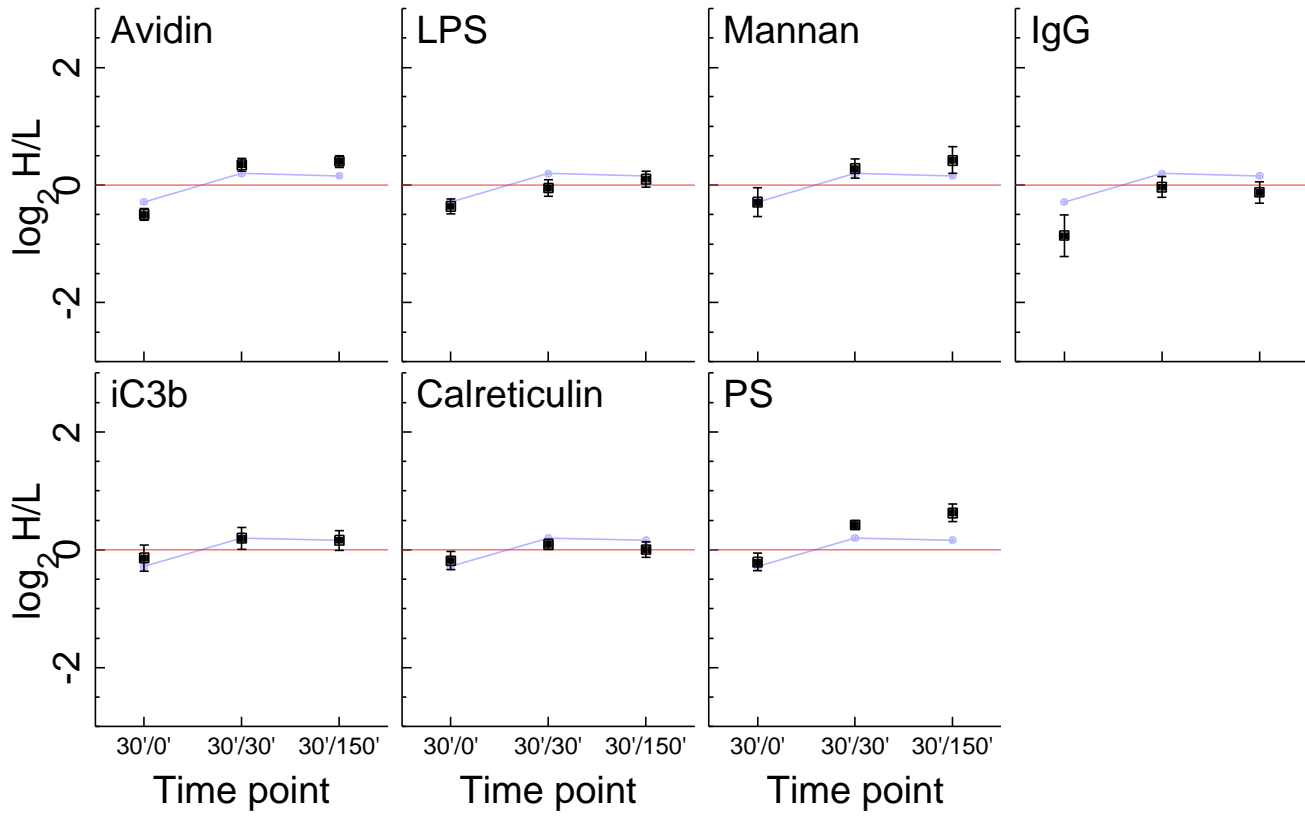

cpt1a (P97742)

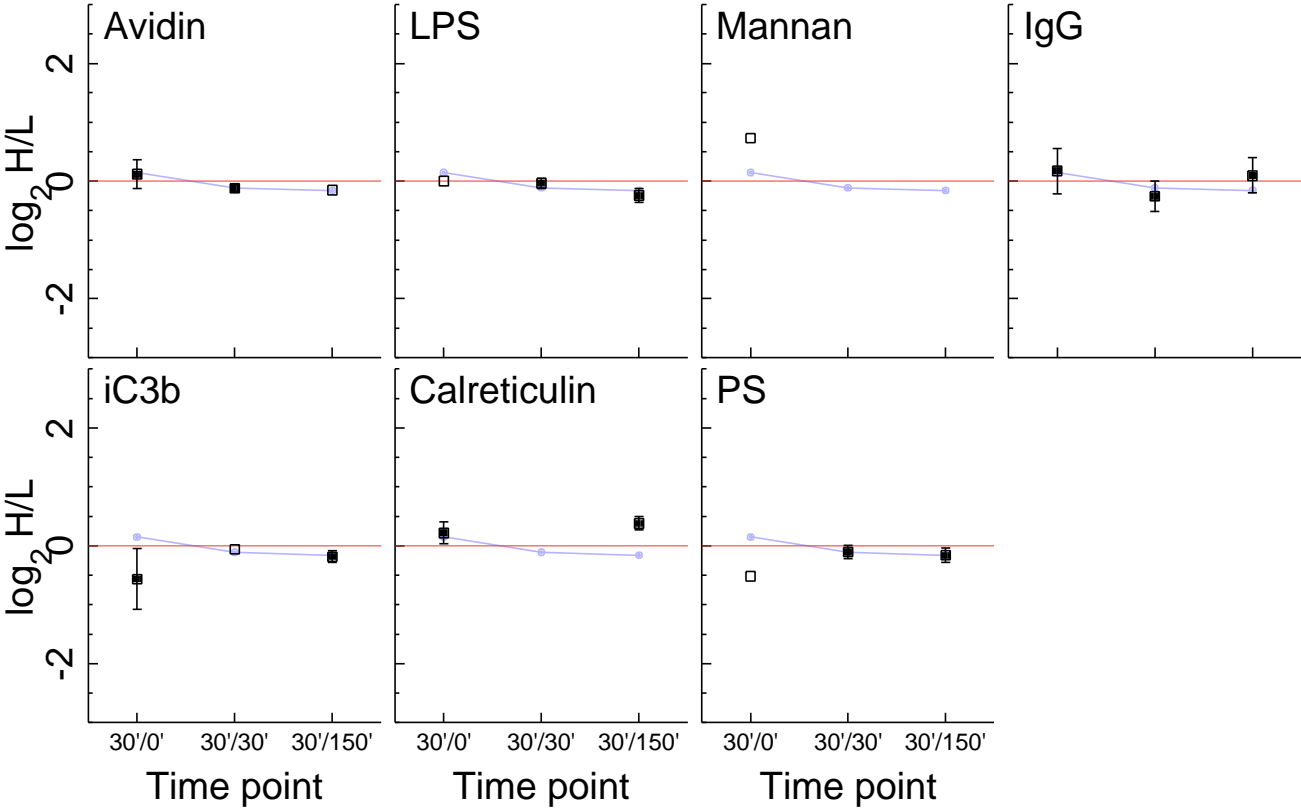

cr1l (Q64735)

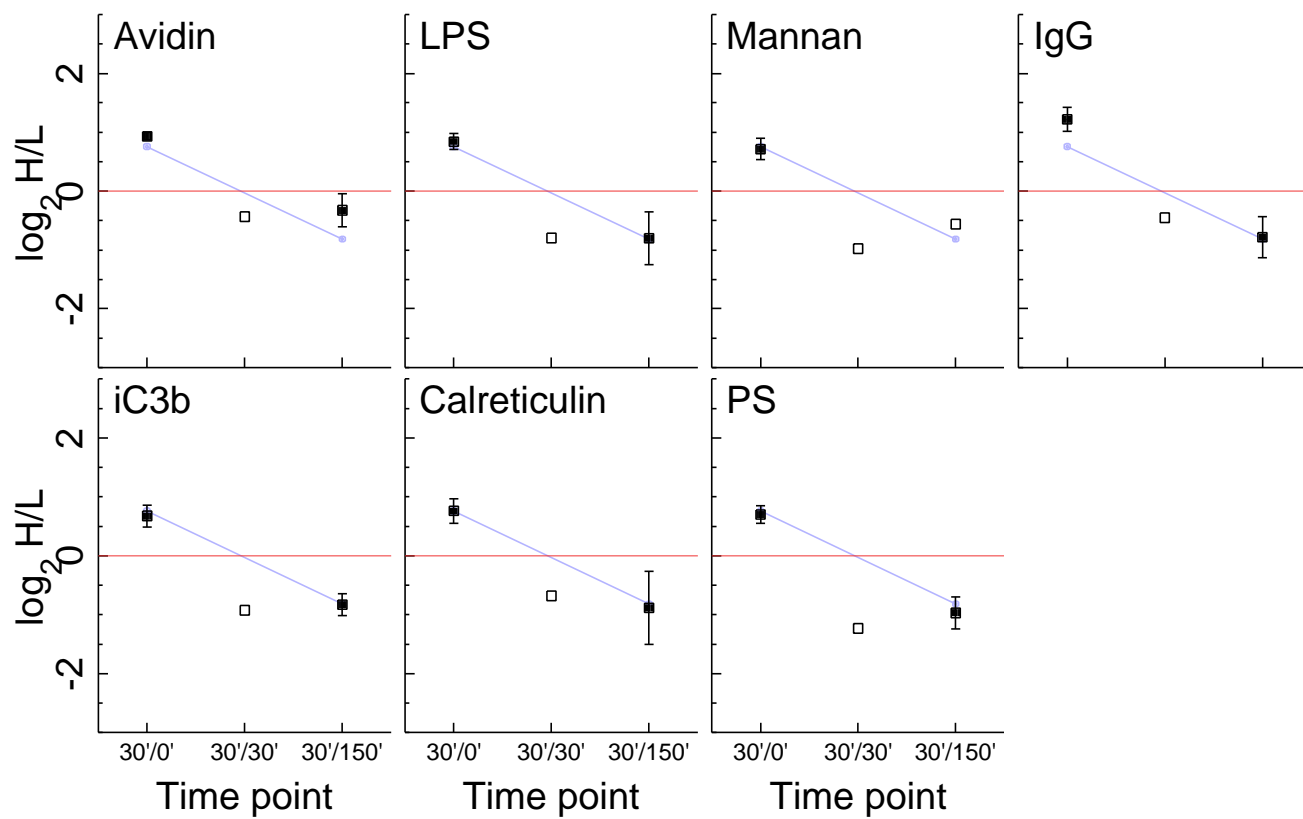



creg1 (O88668)

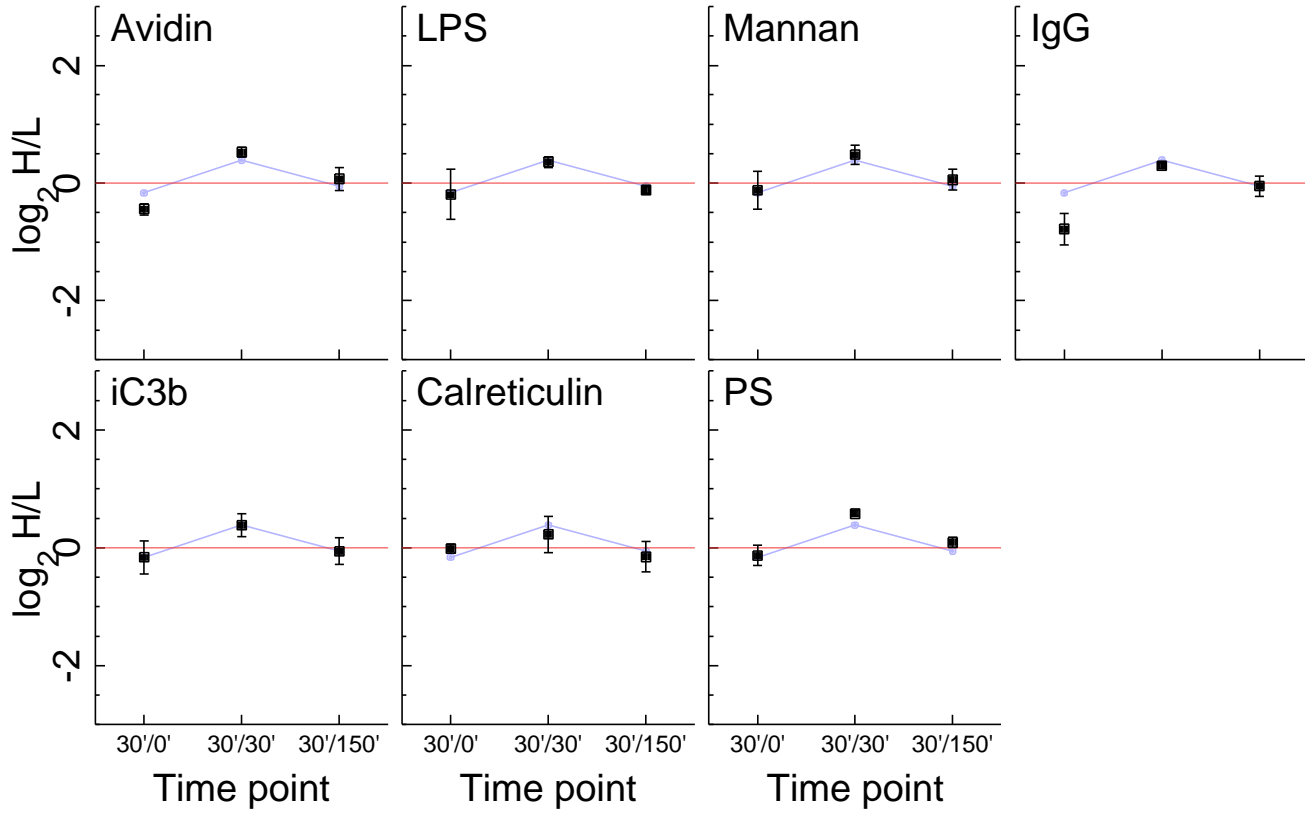

crip1 (P63254)

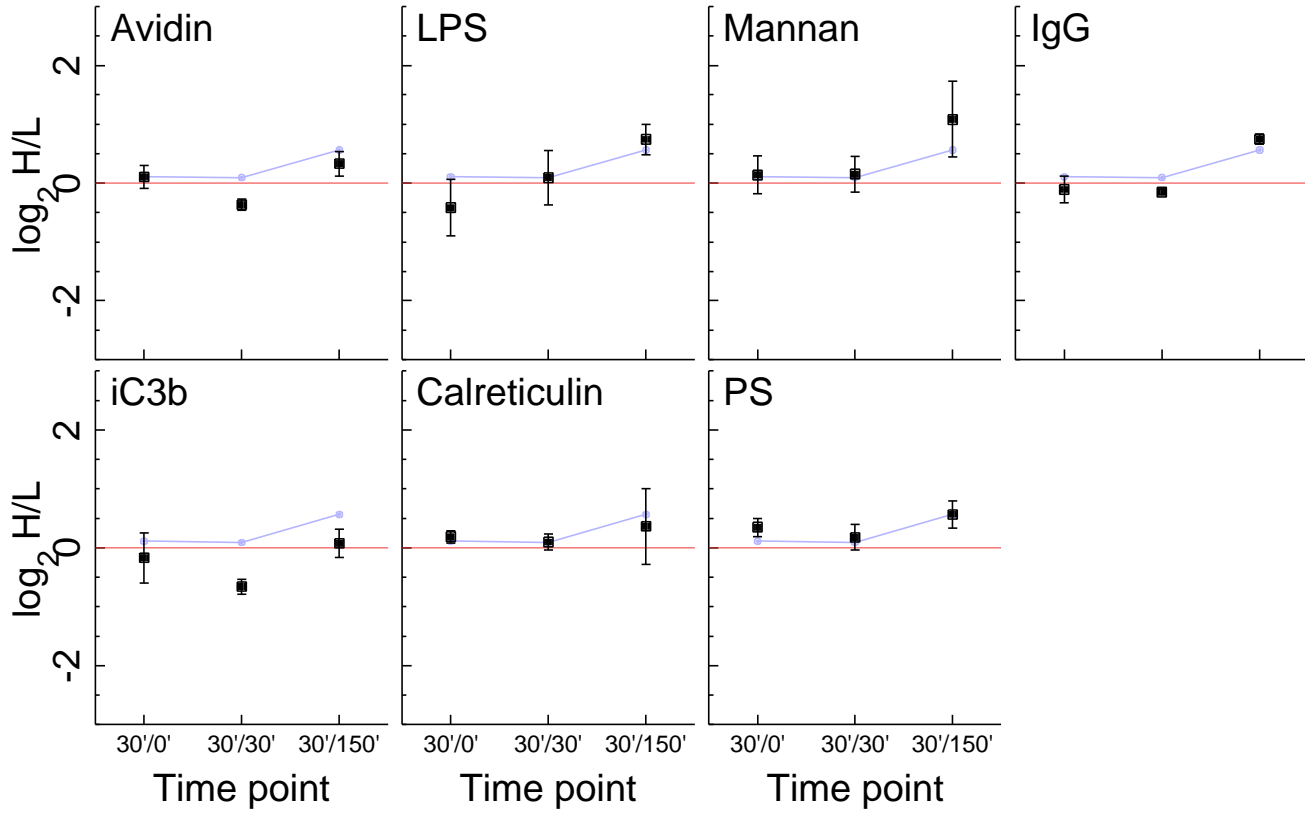

csf1 (P07141)

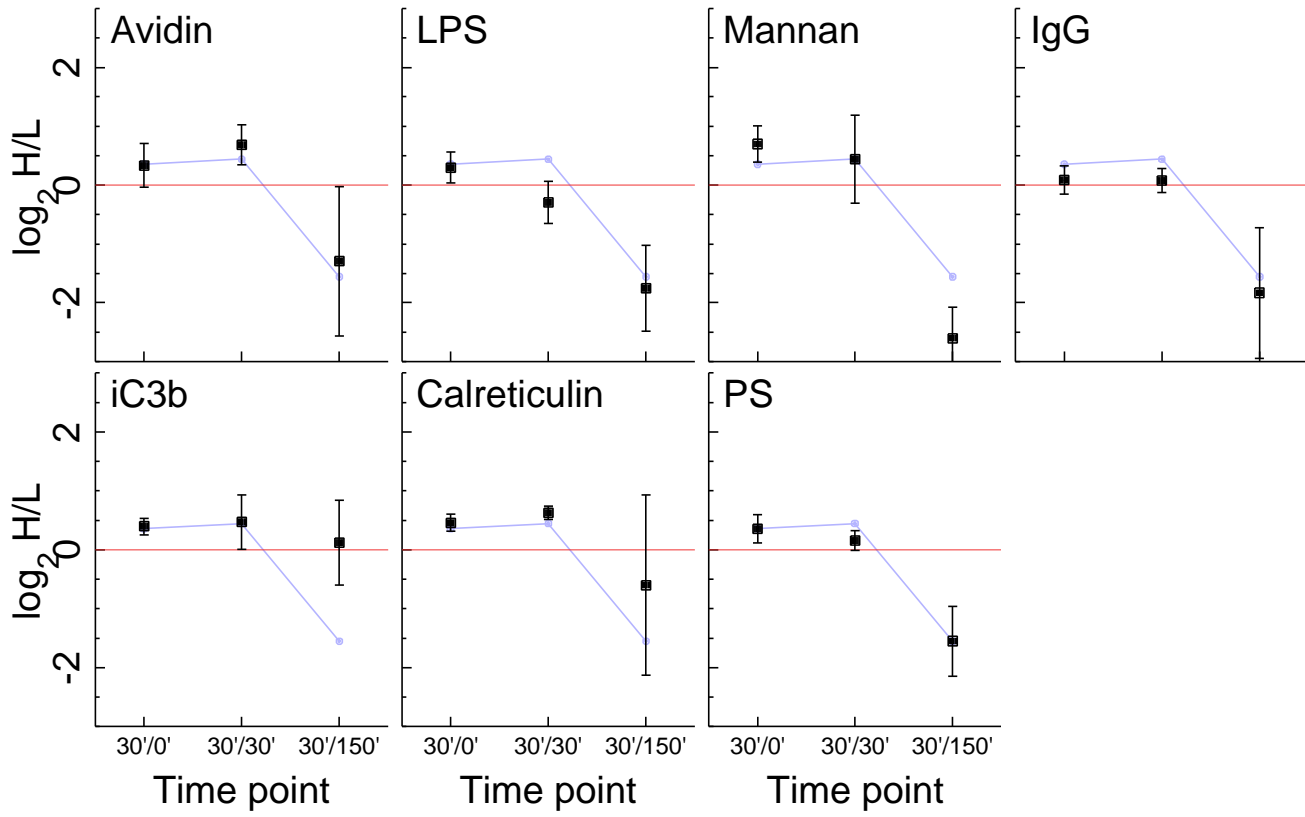

csf1r (P09581)

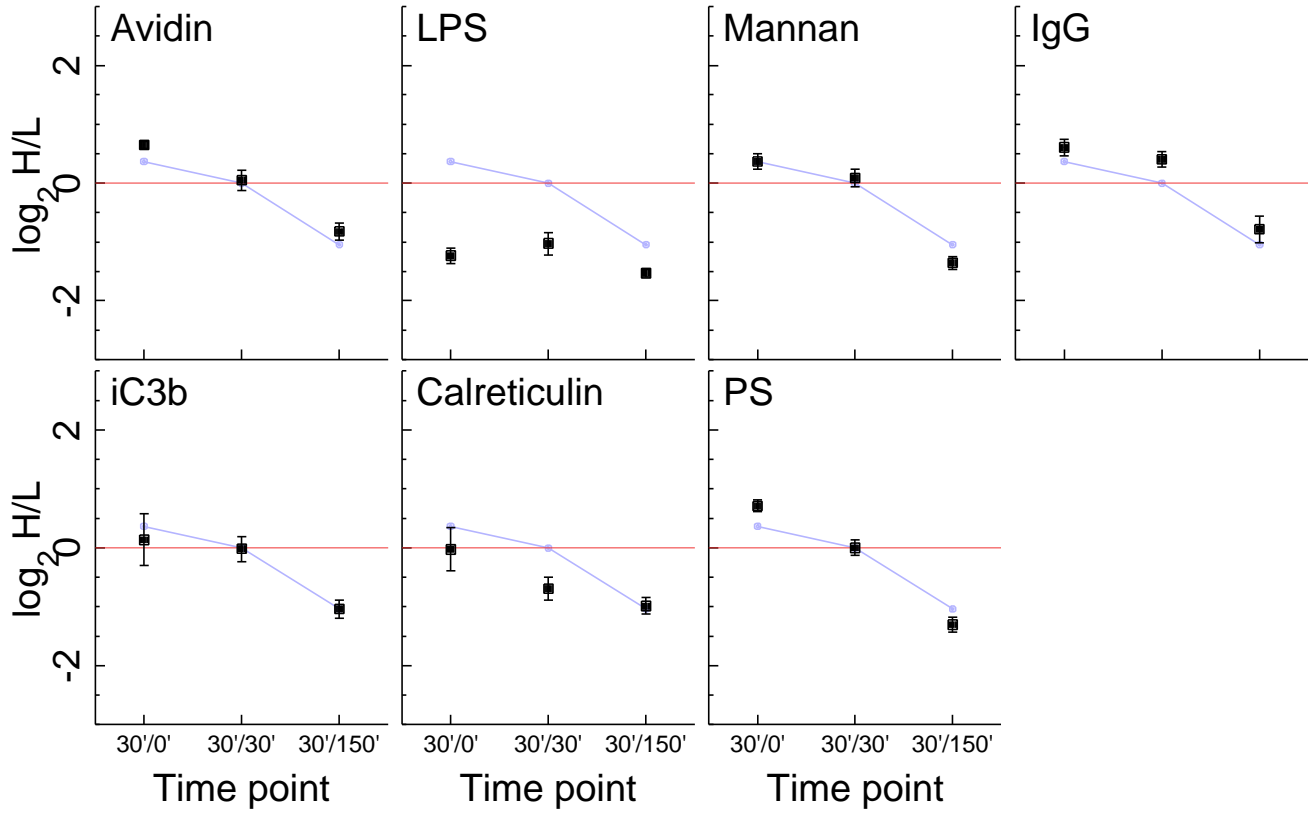

csf2ra (Q00941)

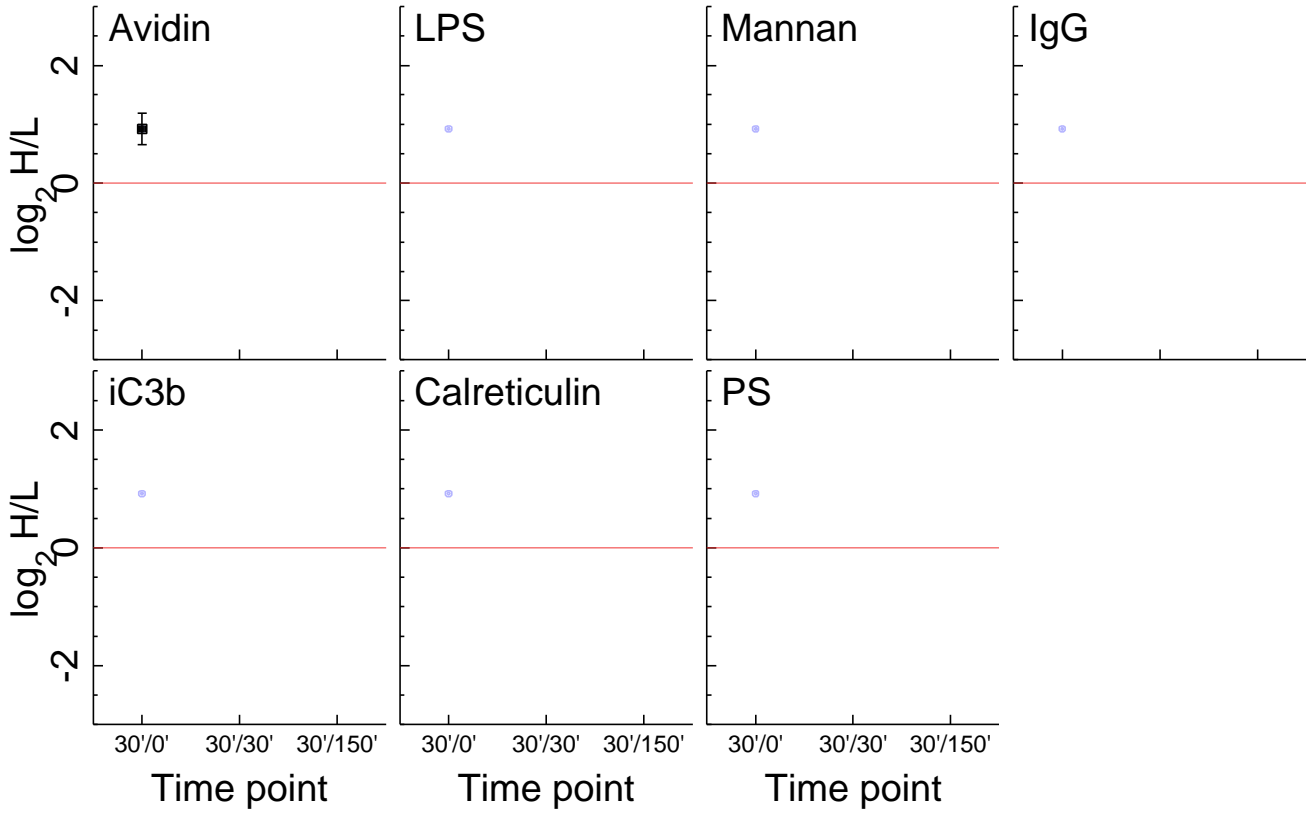

csk (P41241)

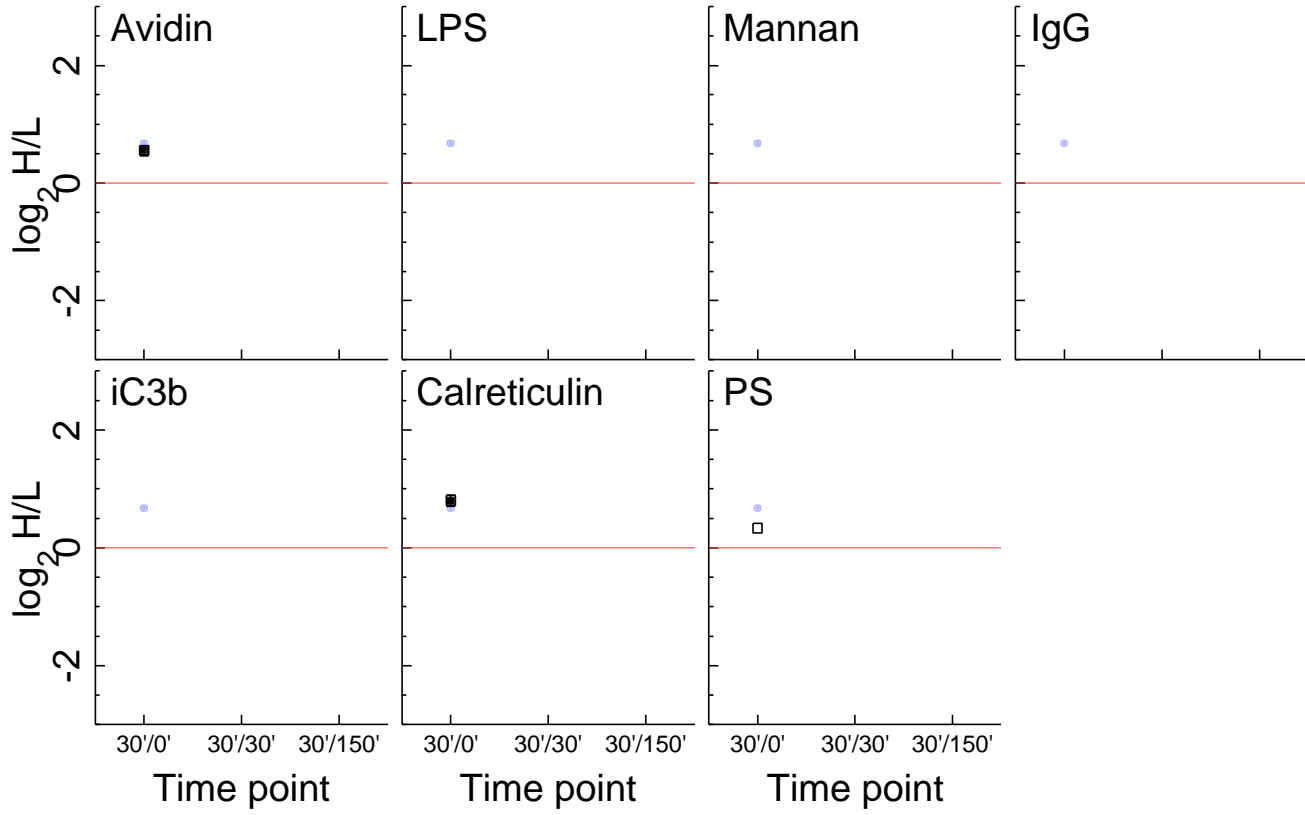

### csnk1a1 (E9PWB2)

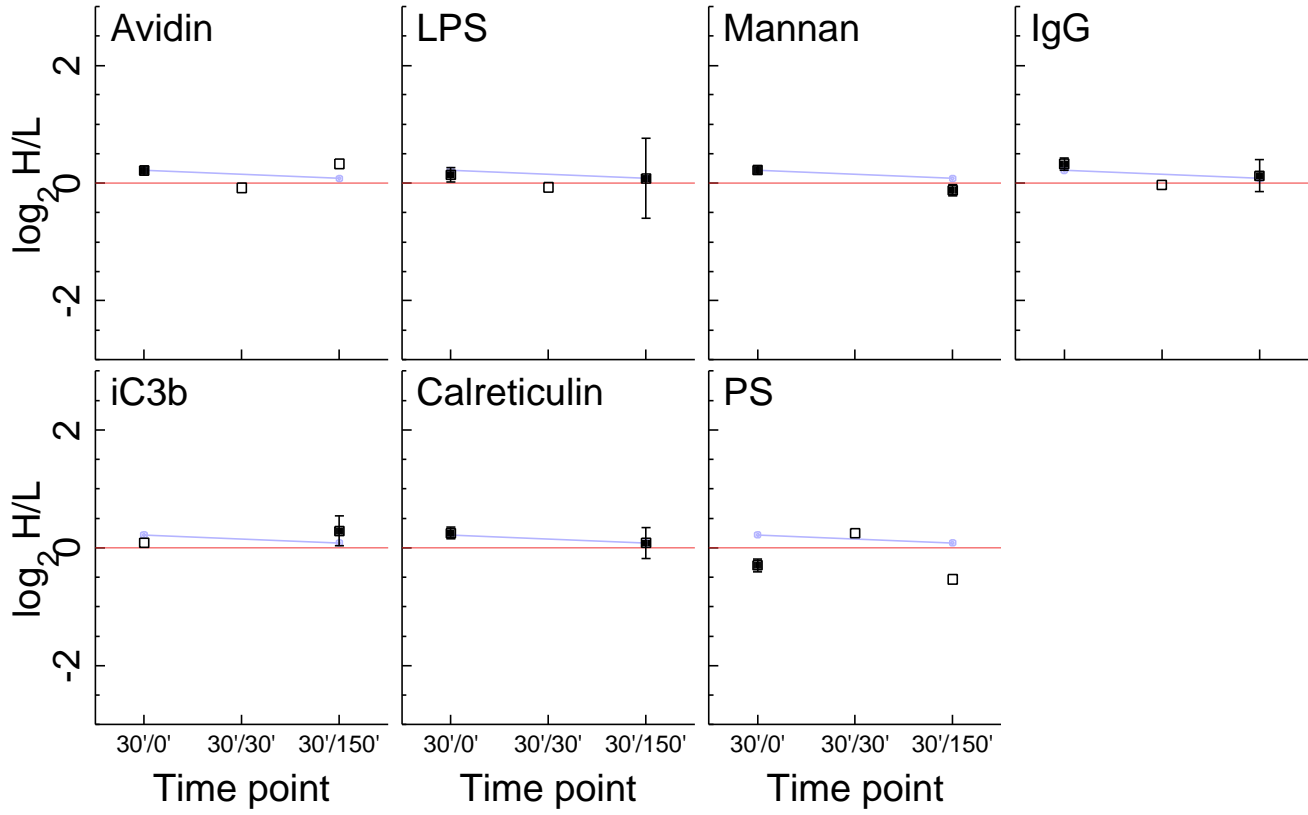

### csnk1g3 (Q8C4X2)

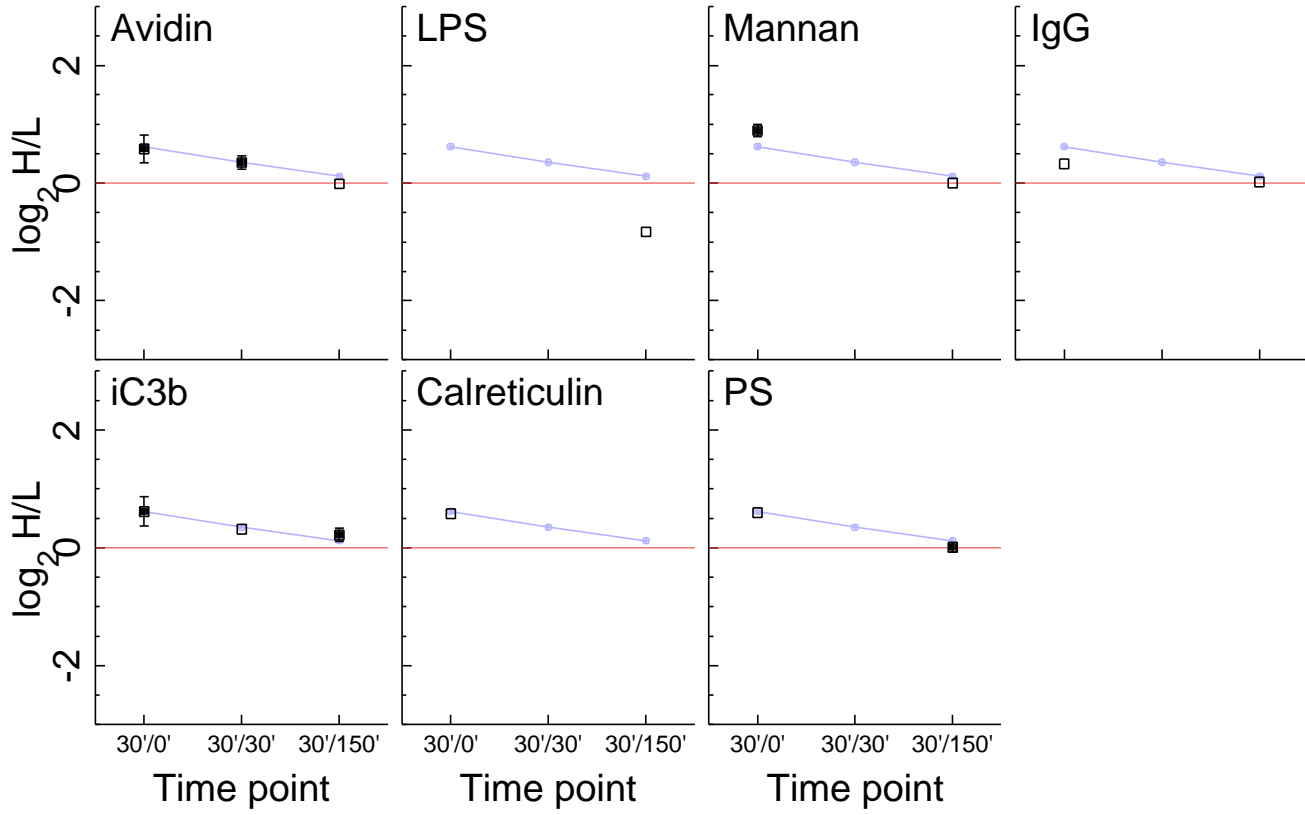



### csnk2a1 (Q60737)

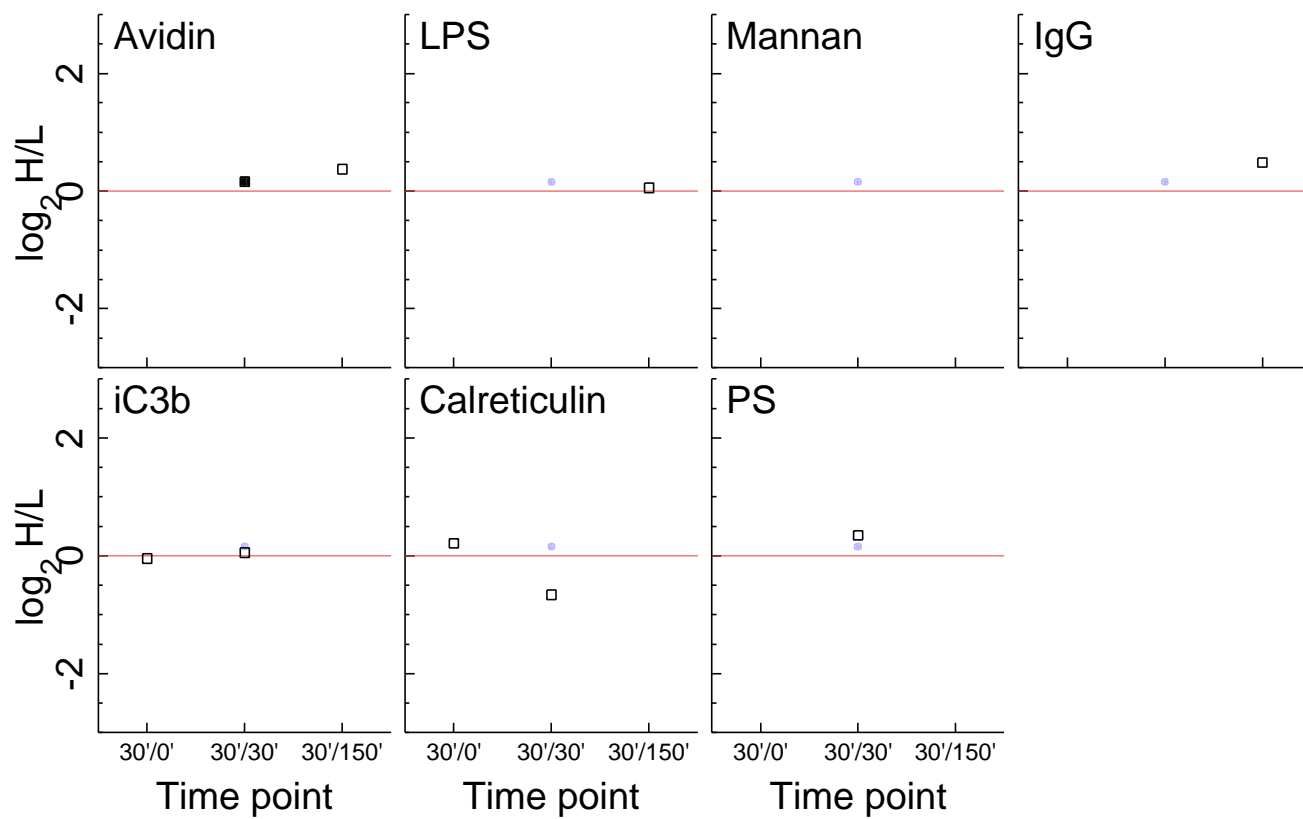

csnk2b (P67871)

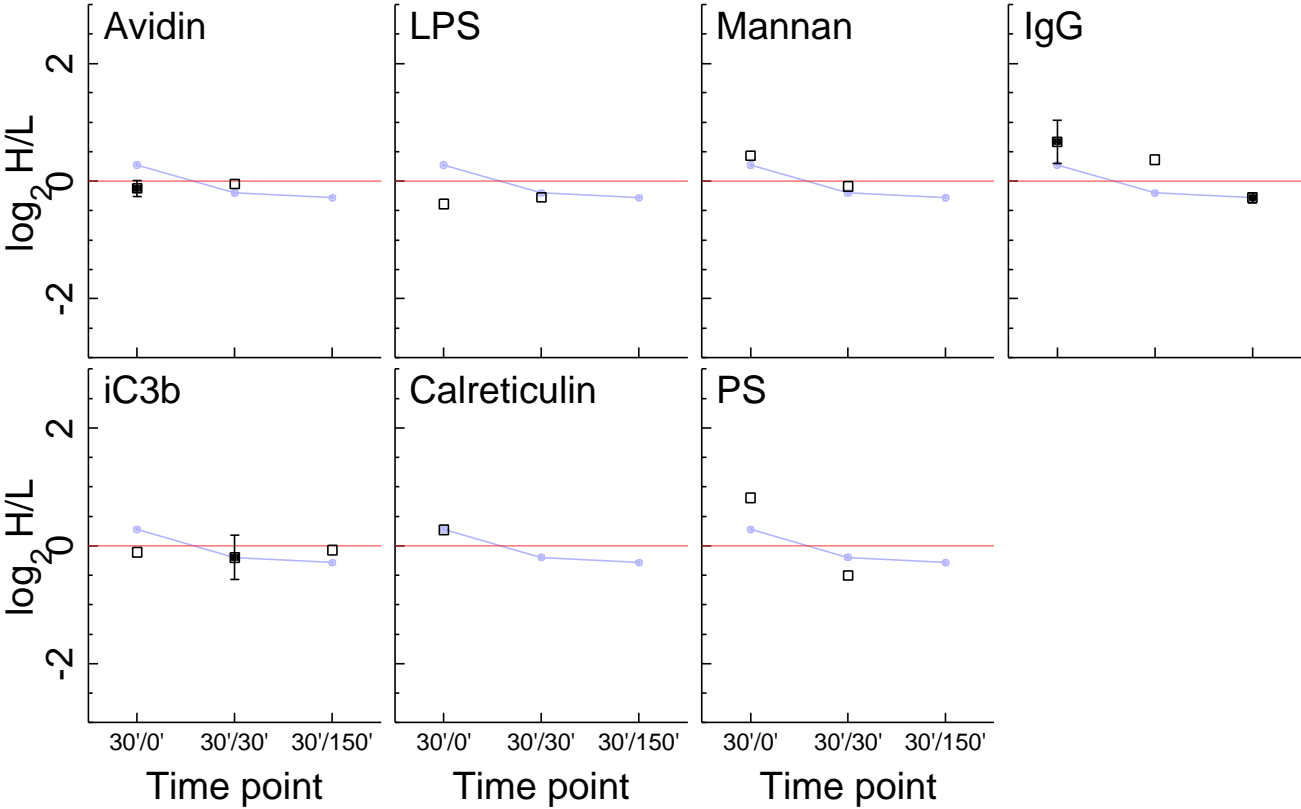

cs (Q9CZU6)

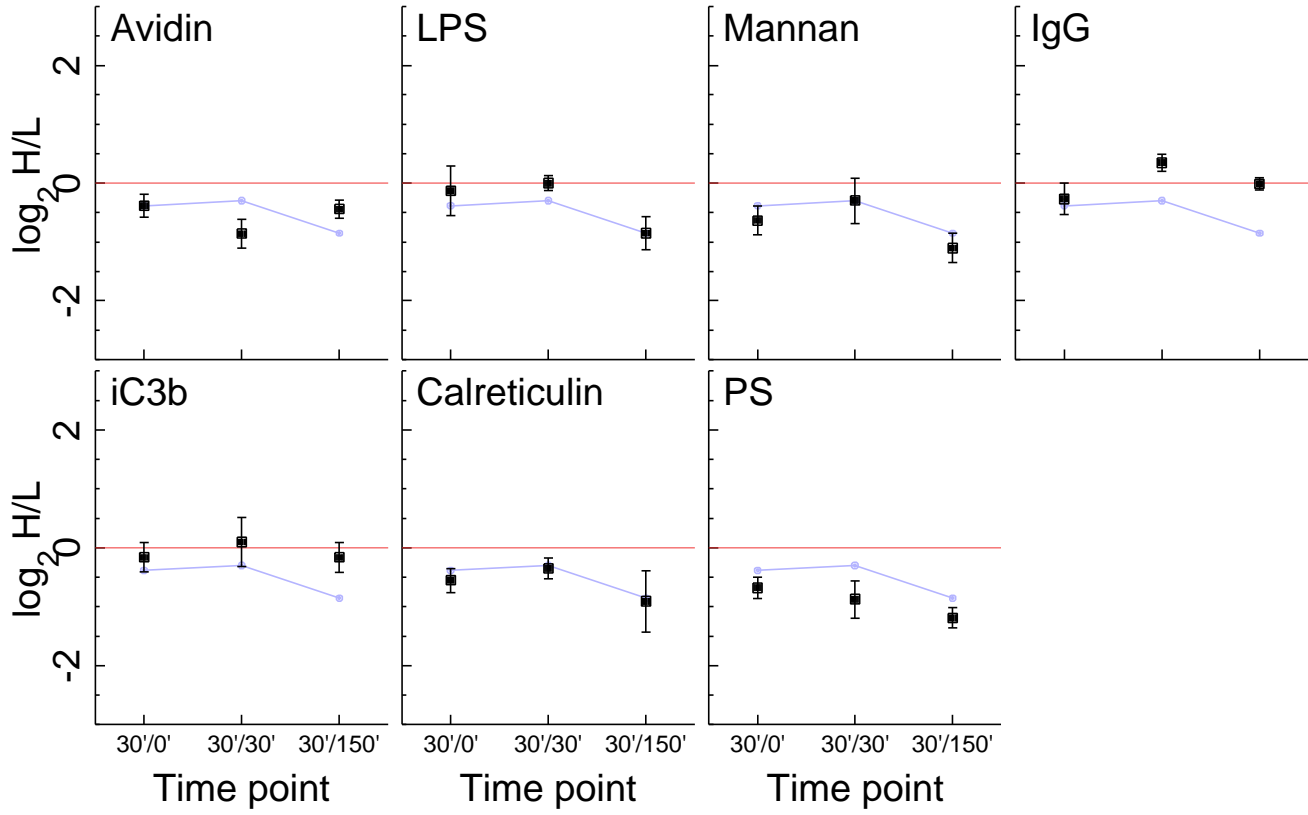

csrp1 (P97315)

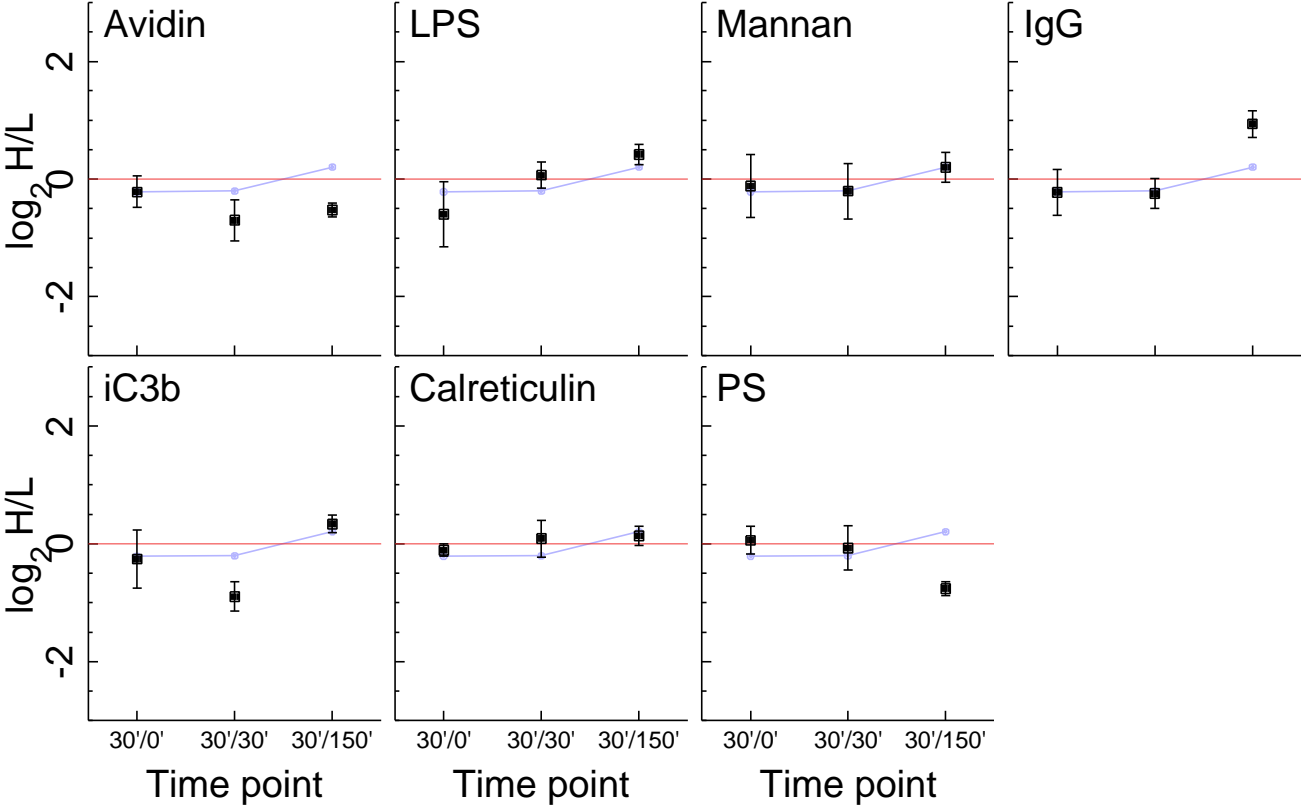

cst3 (P21460)

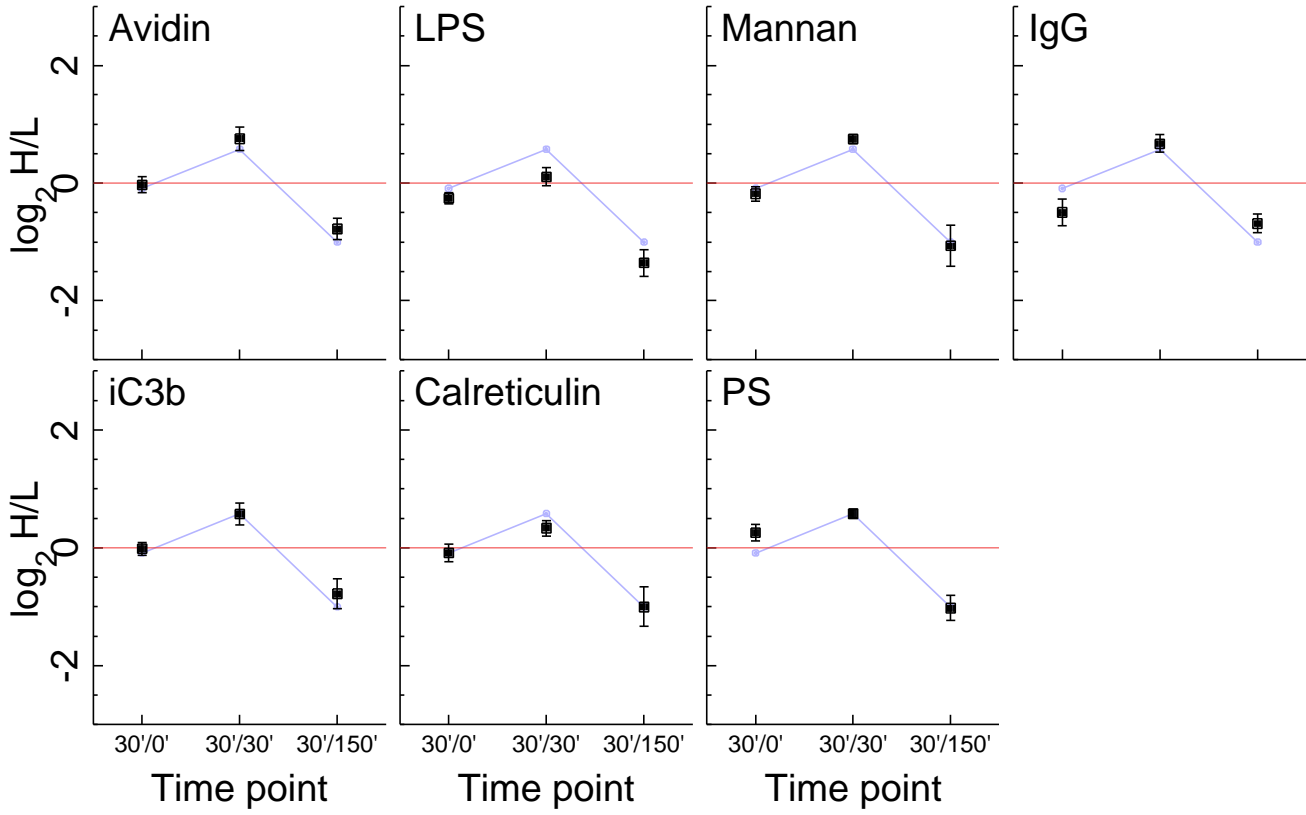

cst7 (O89098)

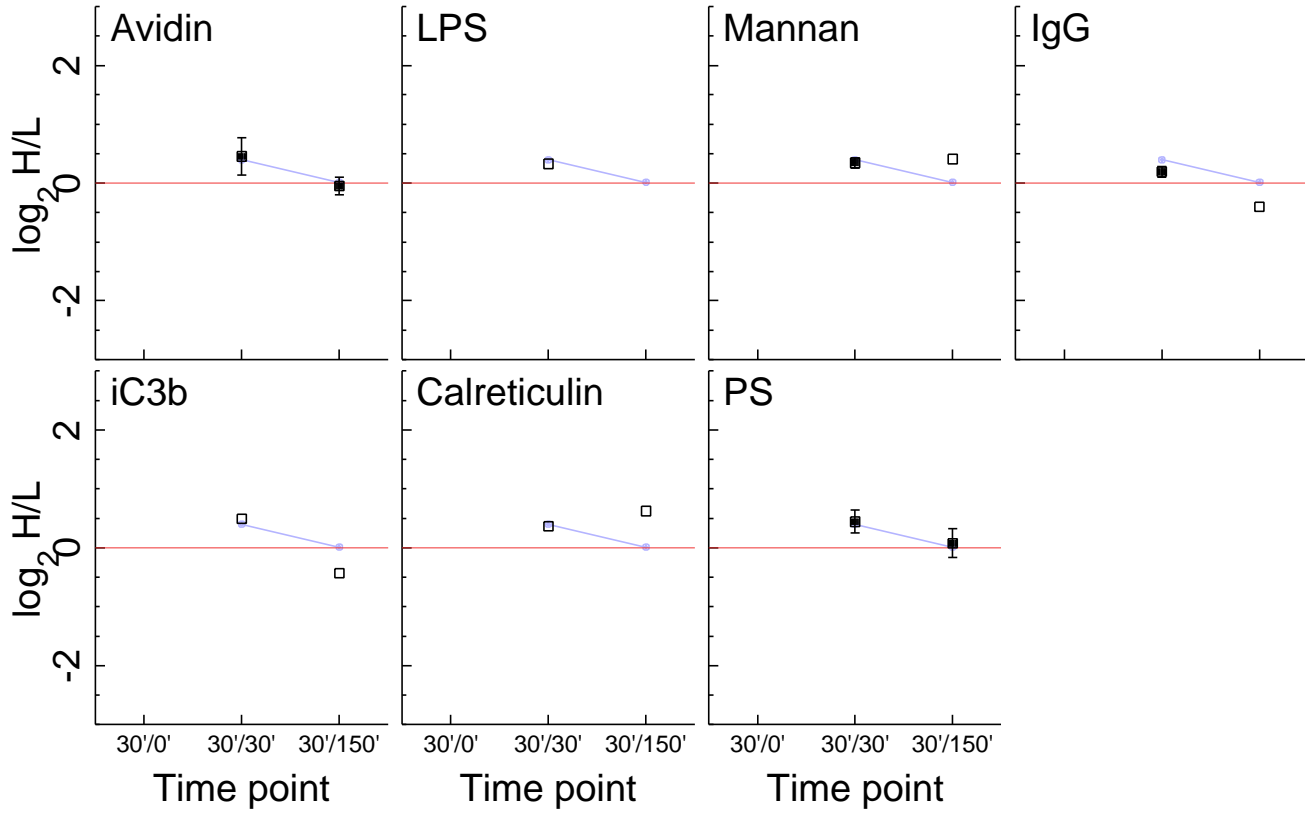

cstb (Q62426)

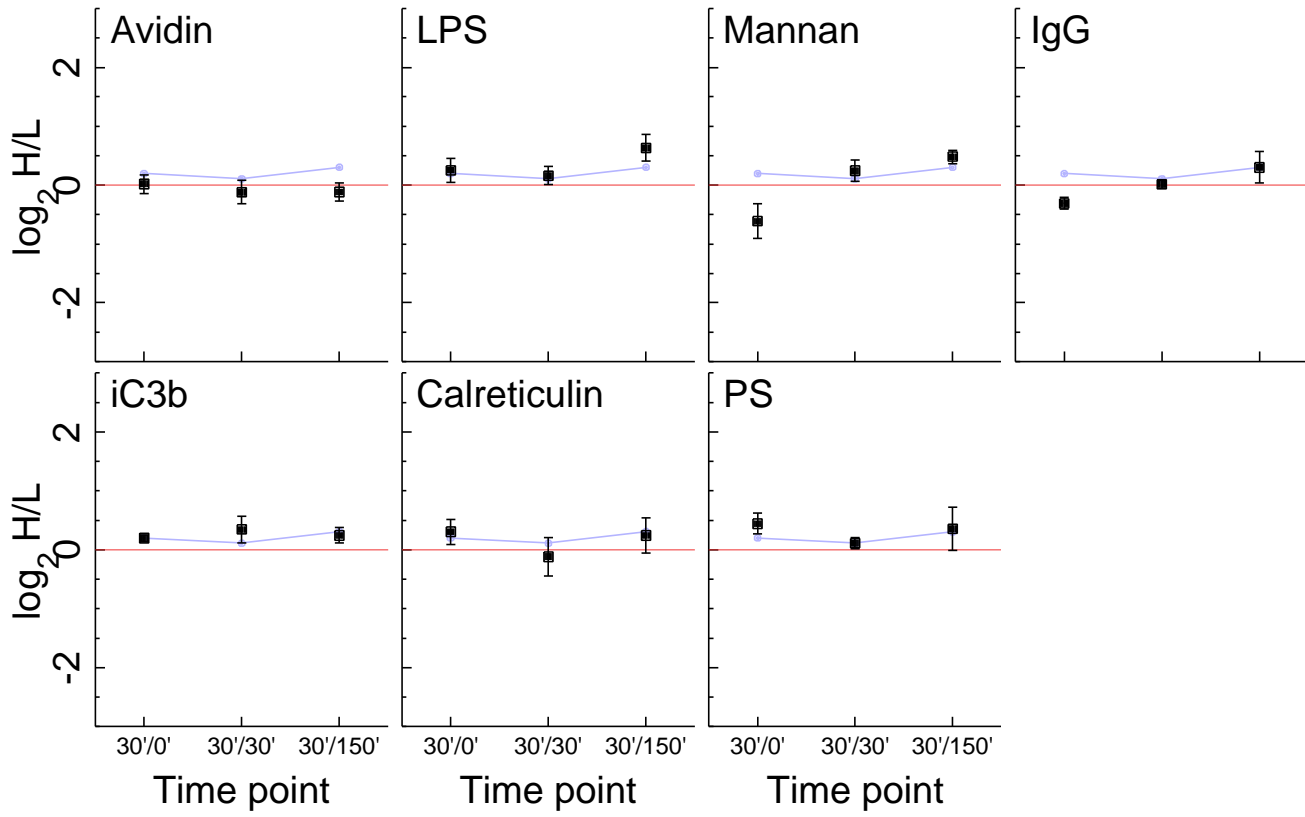

ctbs (Q8R242)

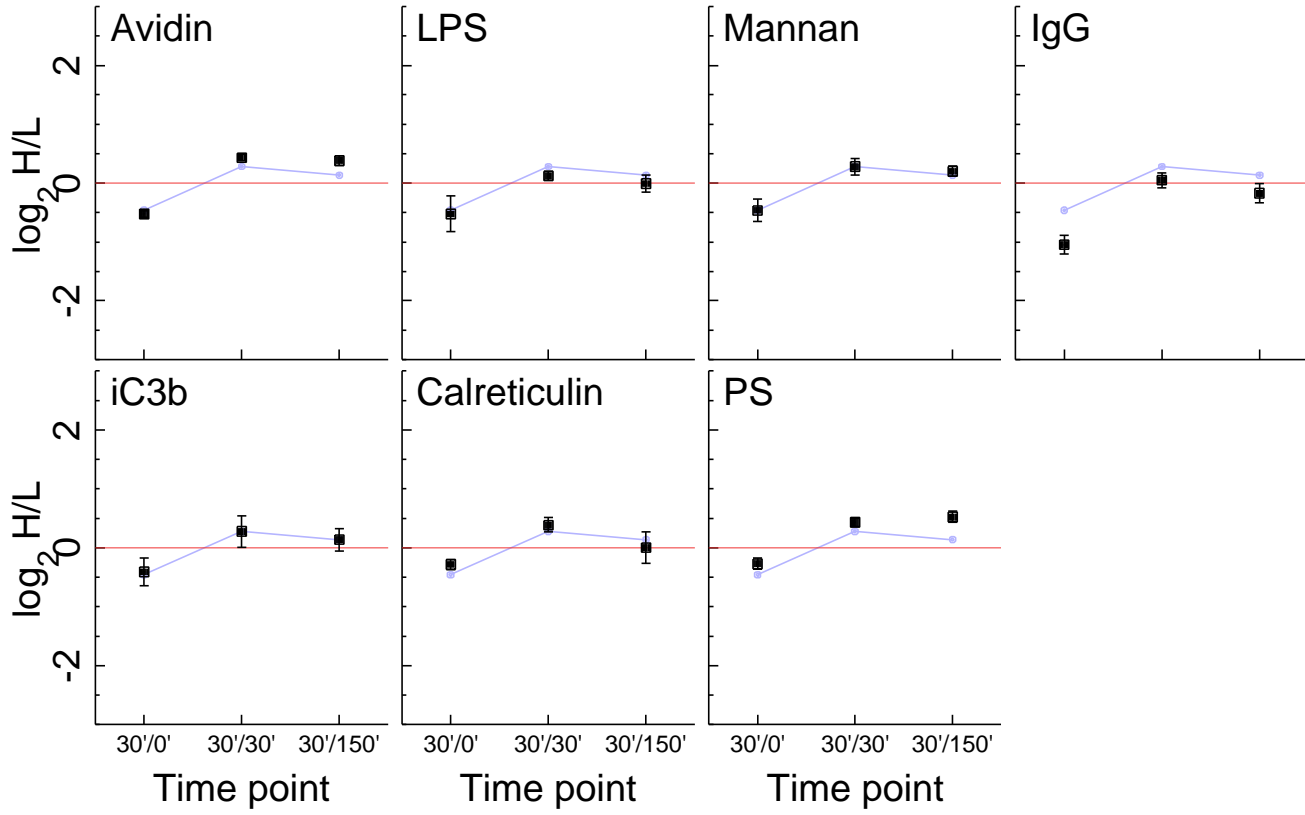



ctdsp1 (P58466)

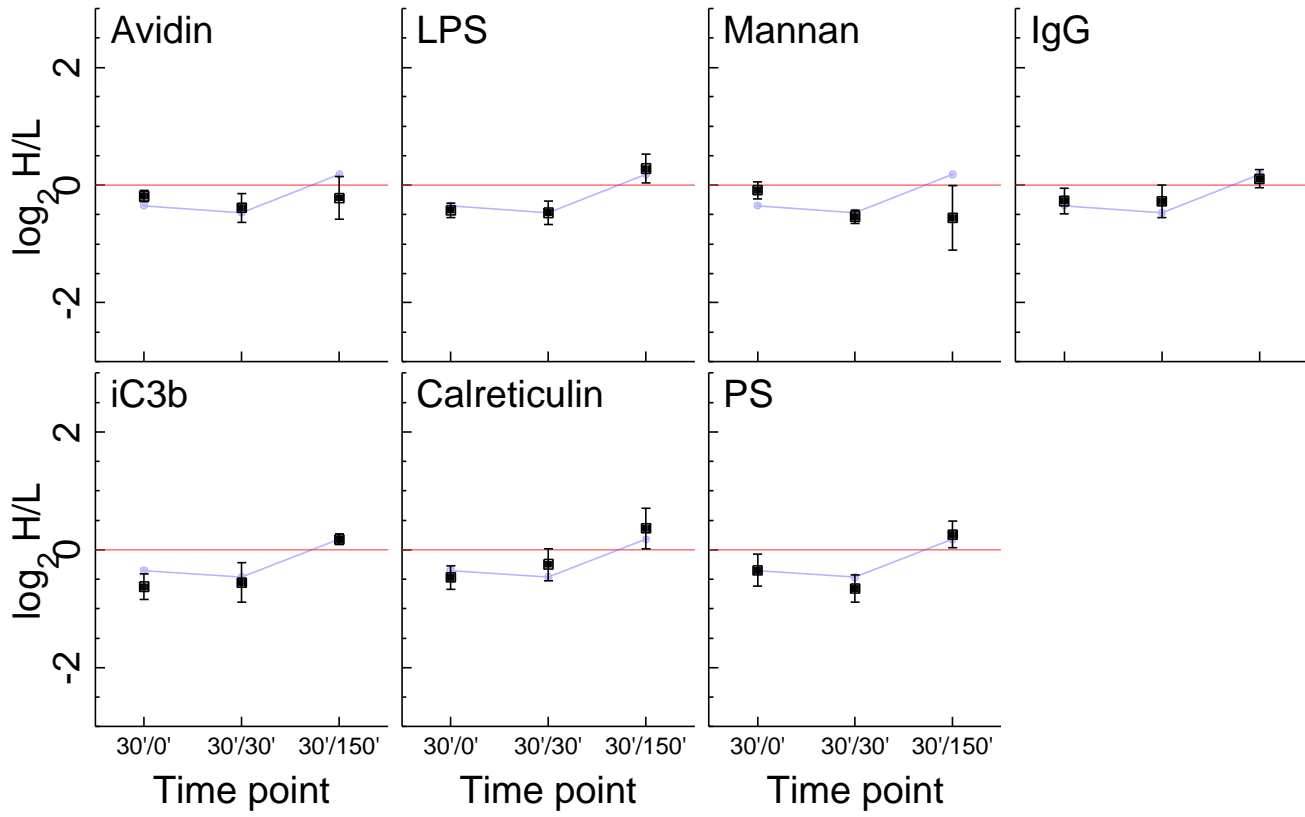

### ctnnd1 (E9Q8Z8)

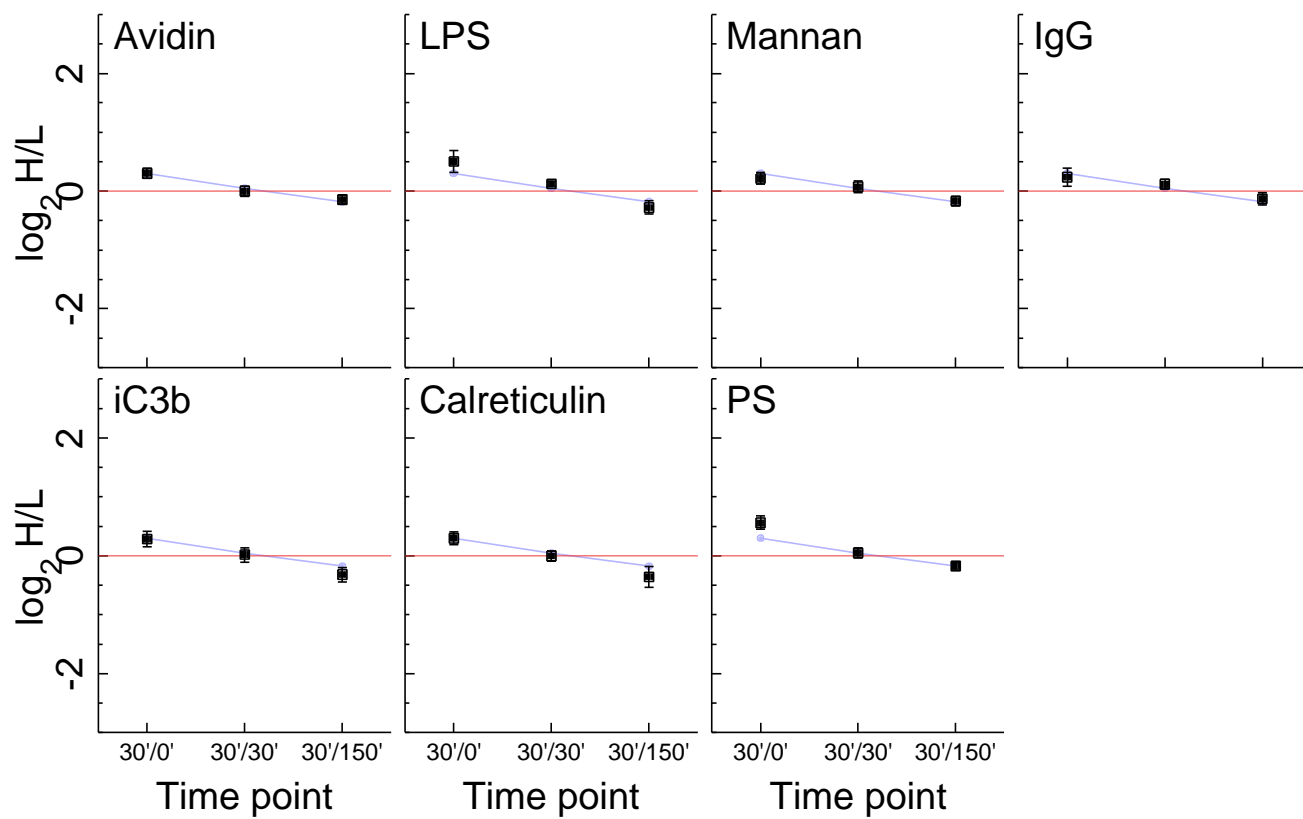

ctsa (G3X8T3)

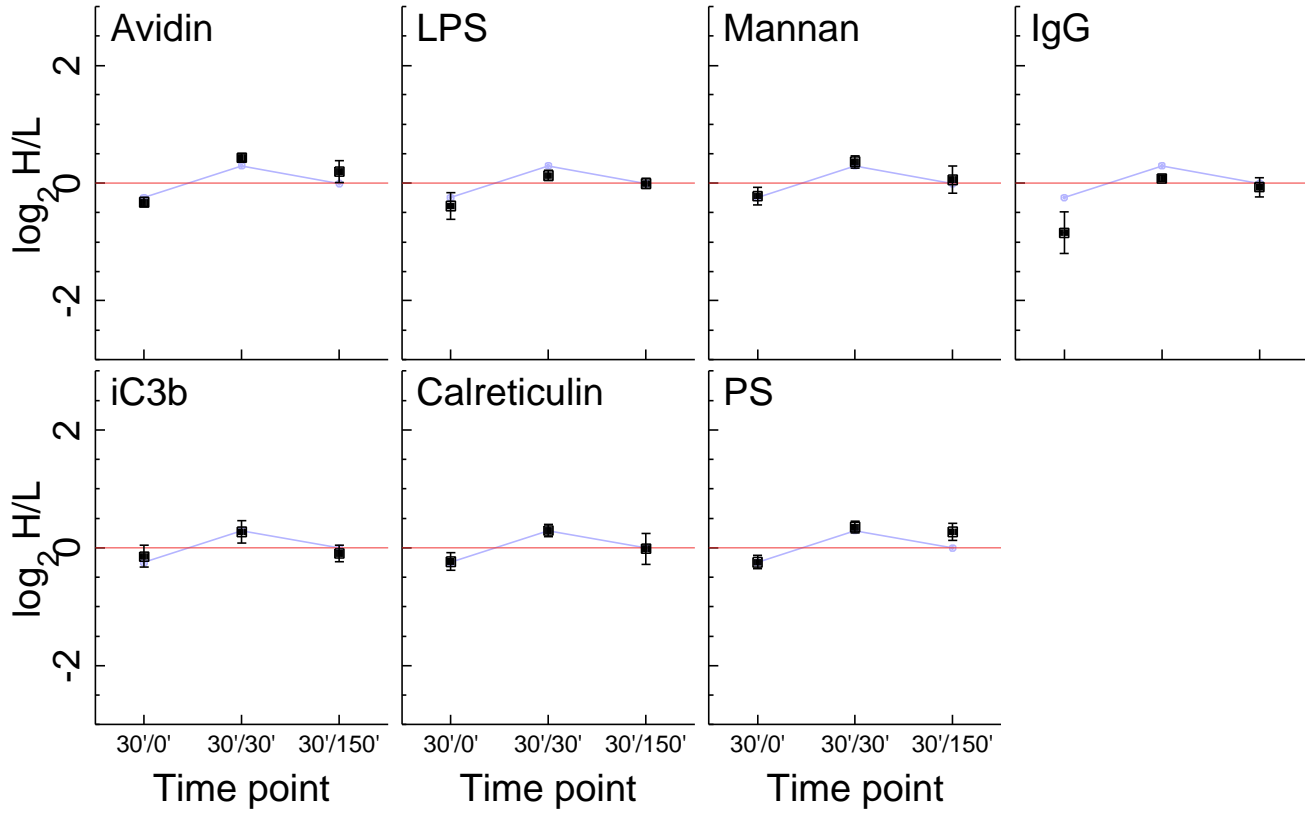

ctsb (P10605)

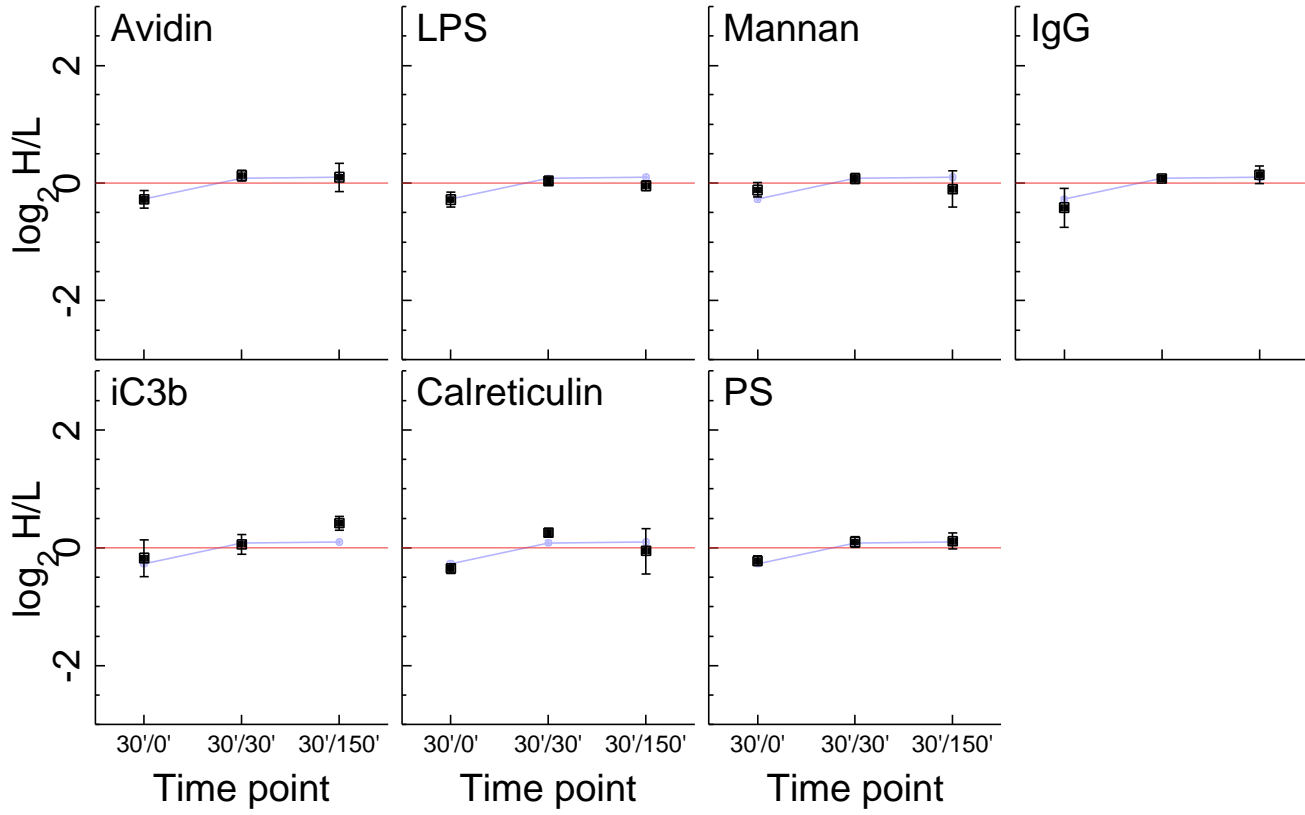

ctsc (P97821)

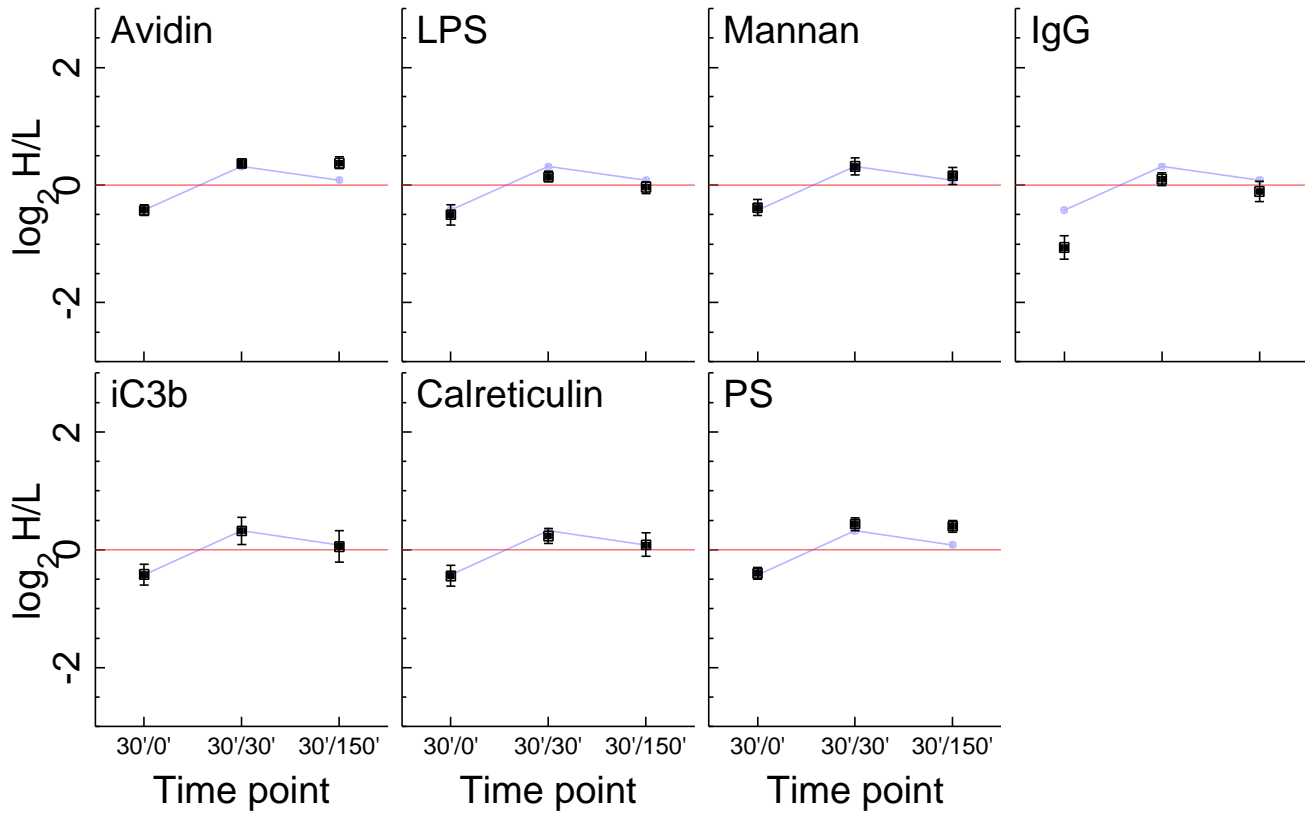

ctsd (P18242)

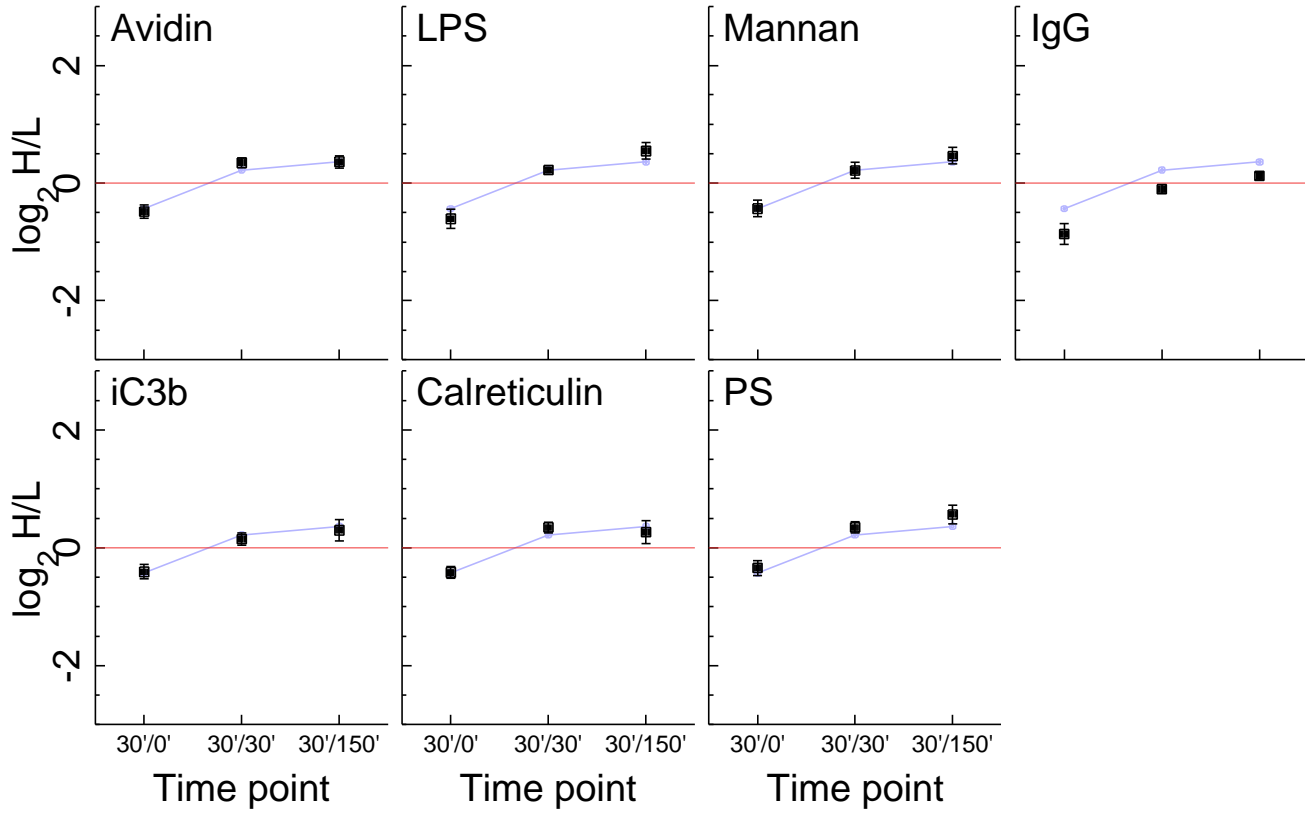

ctsf (Q9R013)

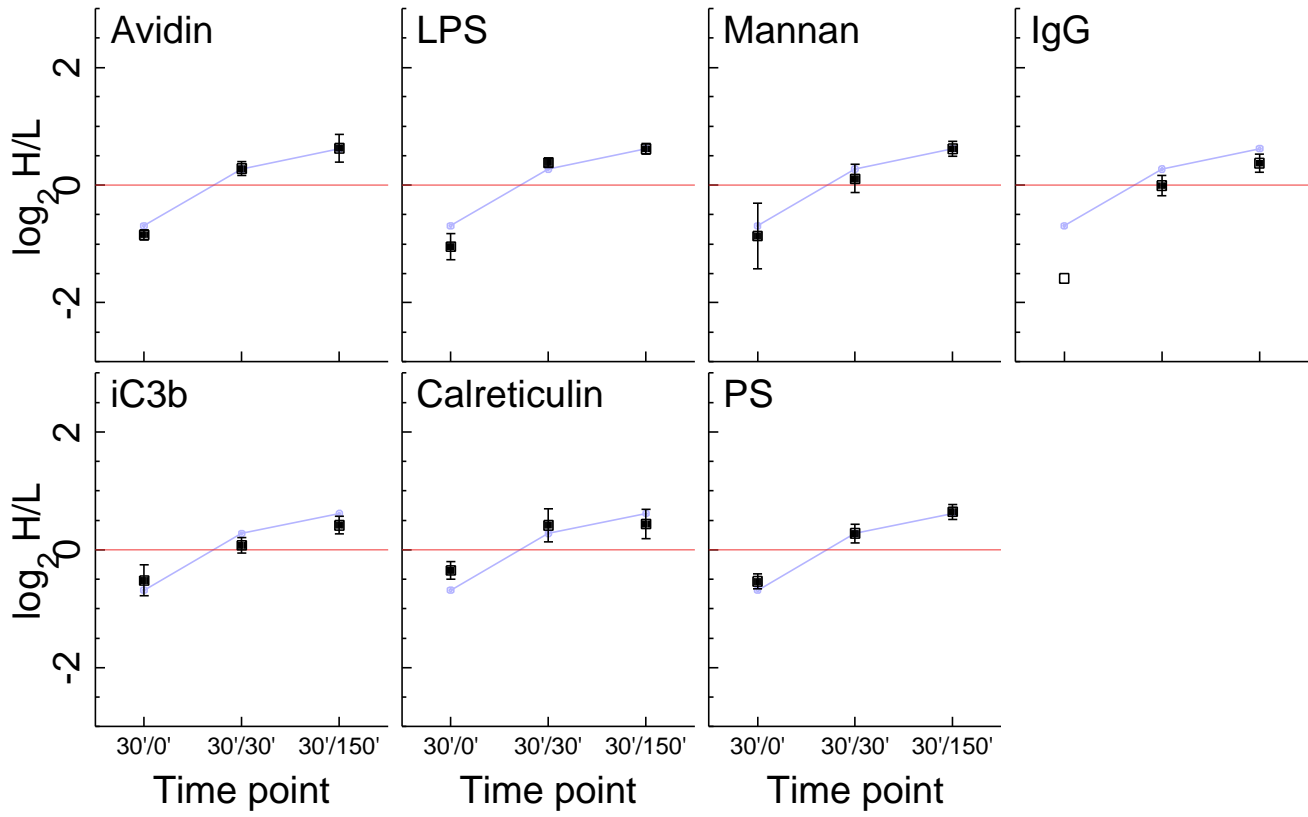

ctsh (P49935)

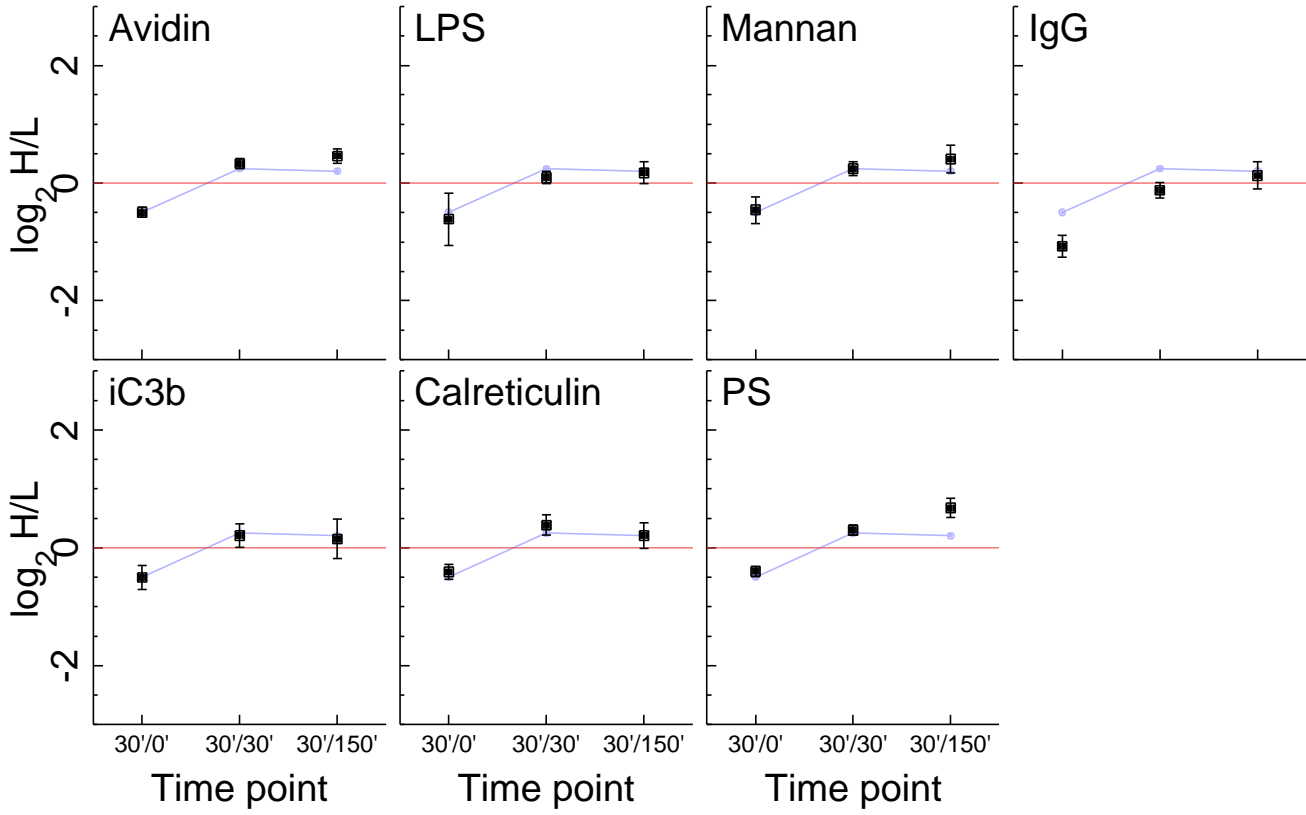



ctsl1 (P06797)

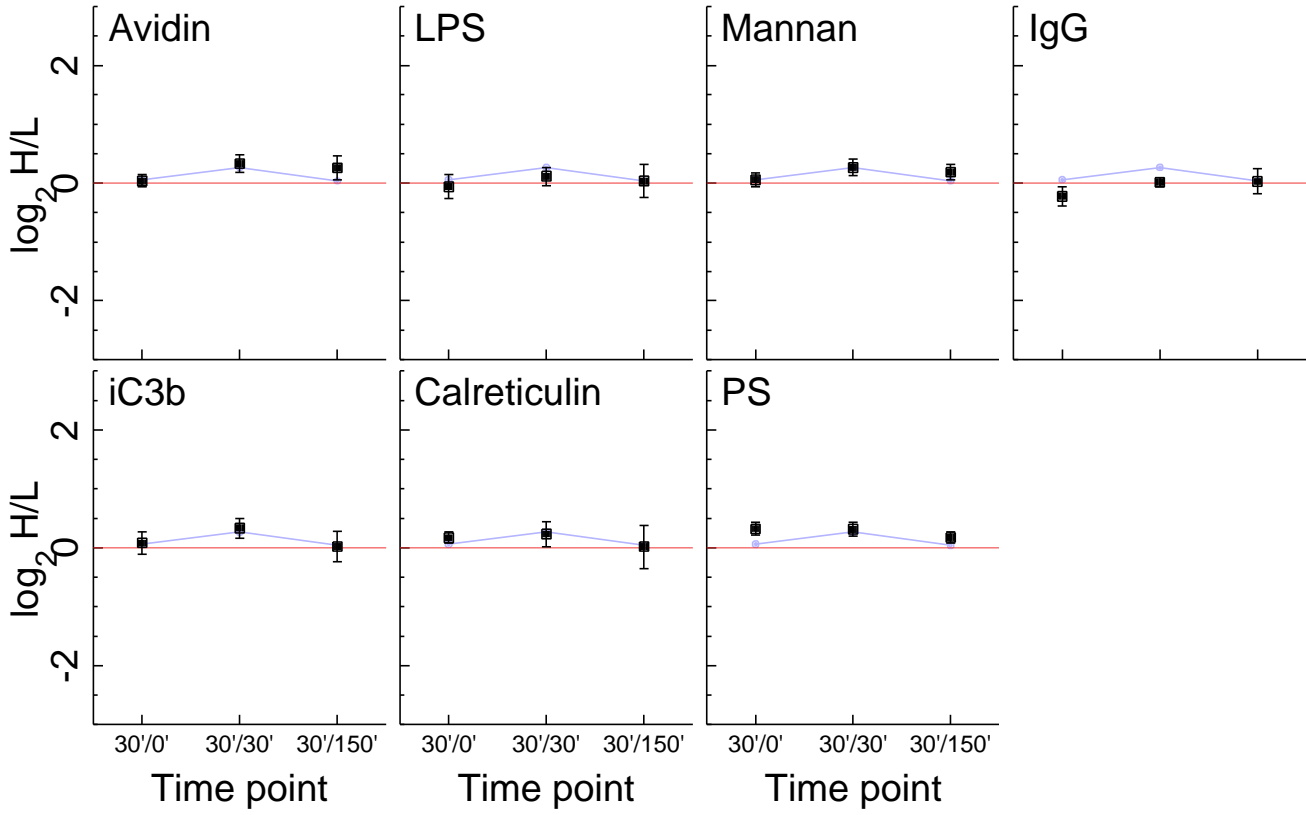

### ctso (Q8BM88)

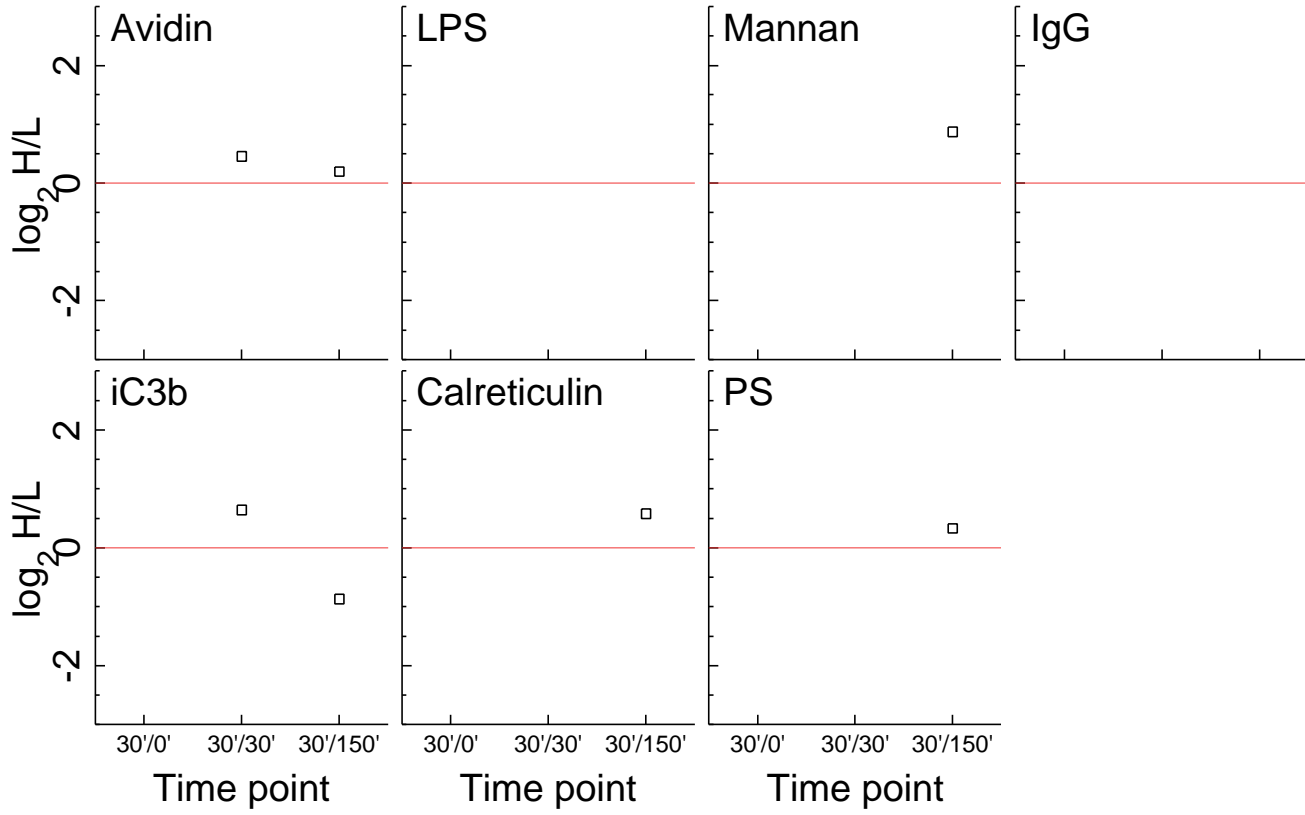

ctss (Q3UD32)

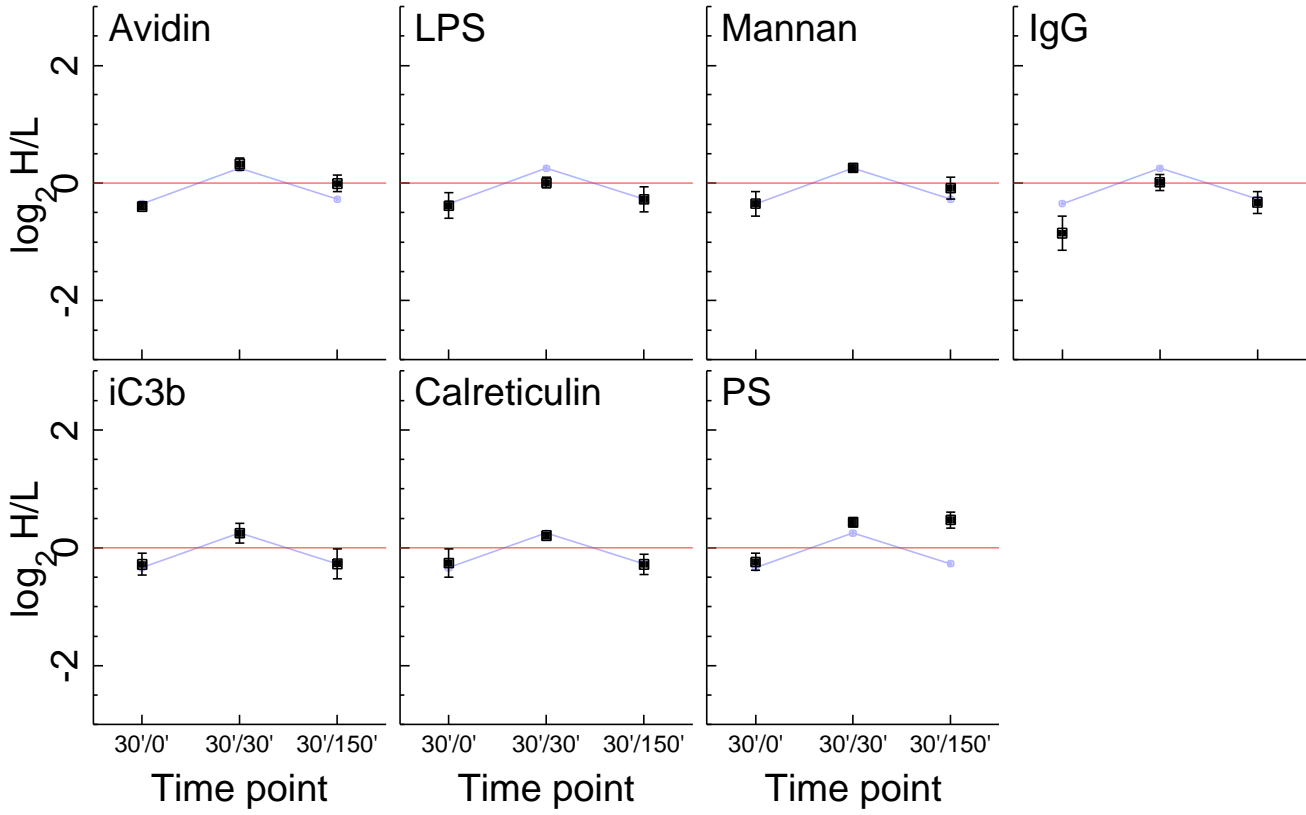

ctsz (Q9WUU7)

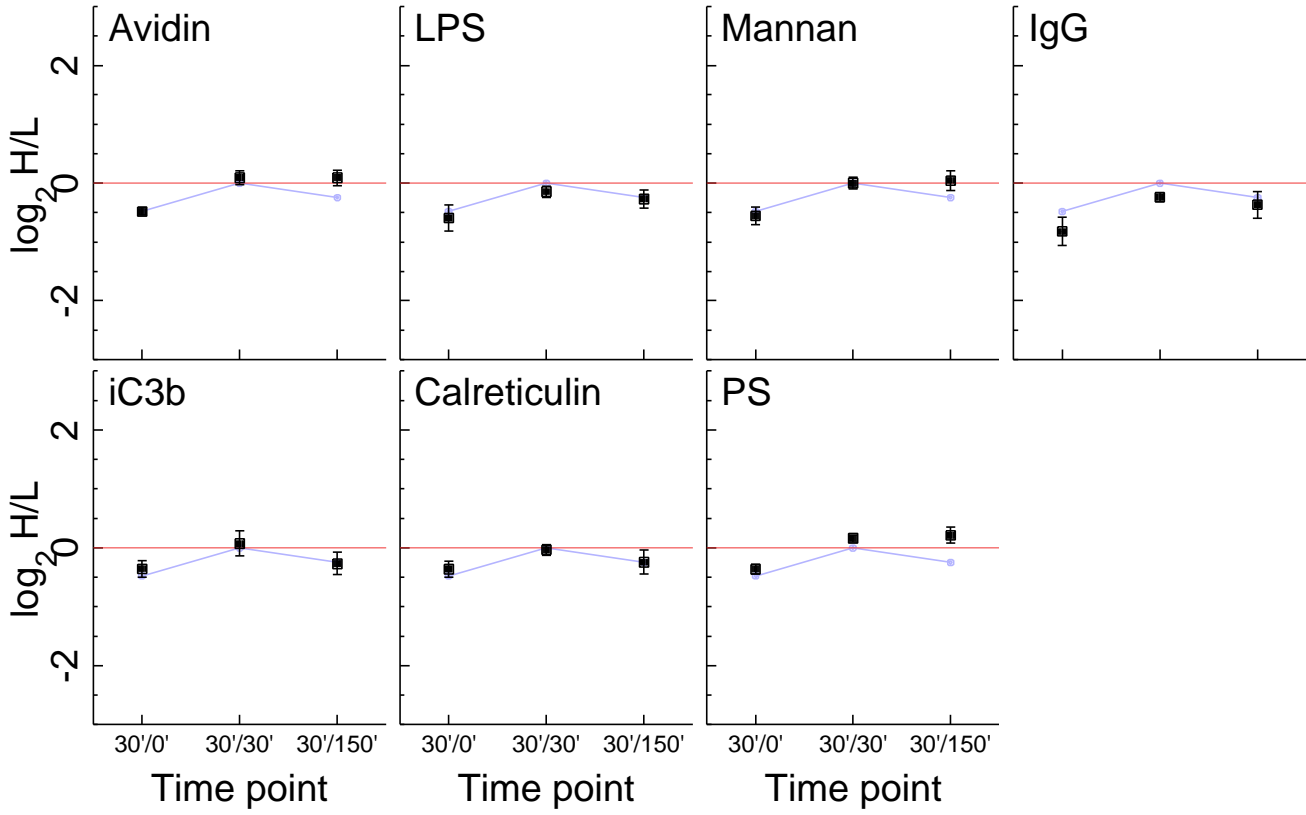

cttnbp2nl (Q99LJ0)

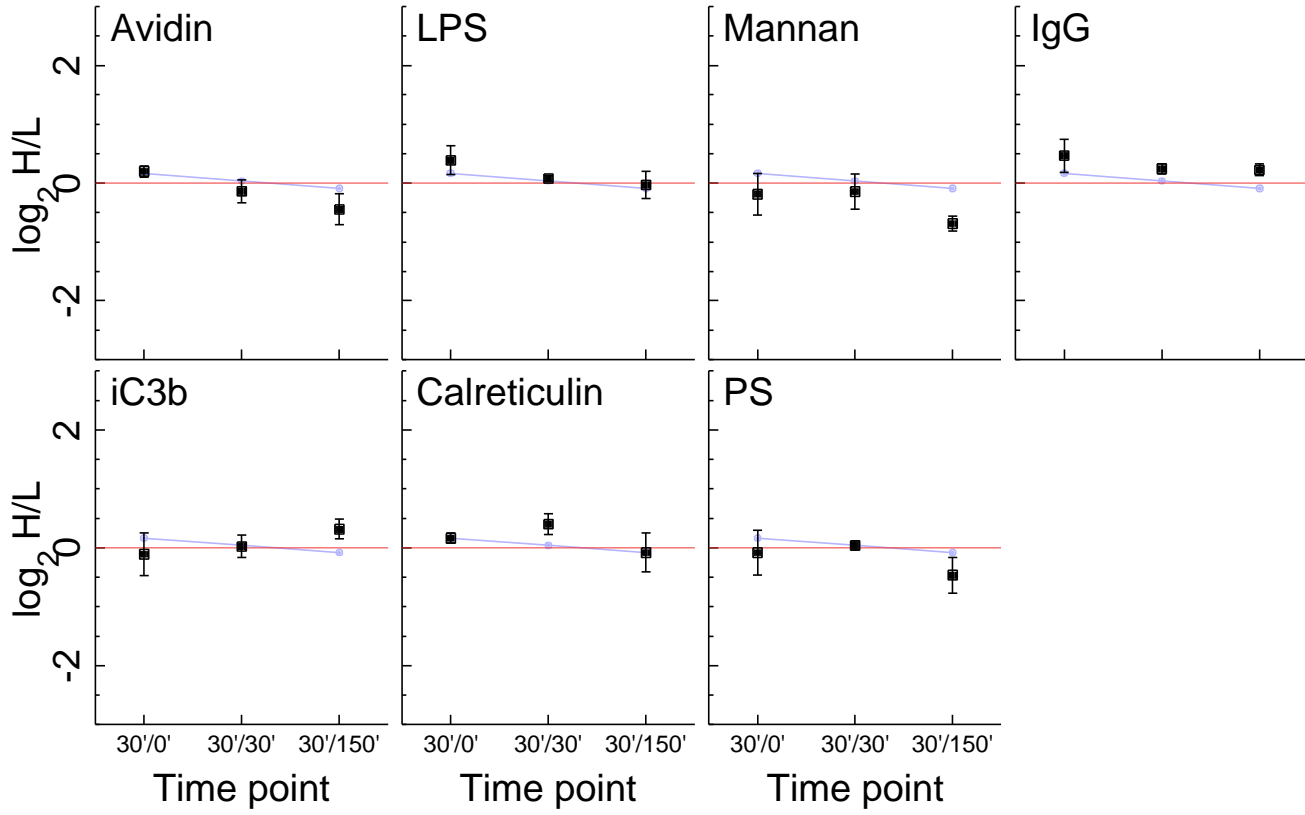

cuedc2 (Q9CXX9)

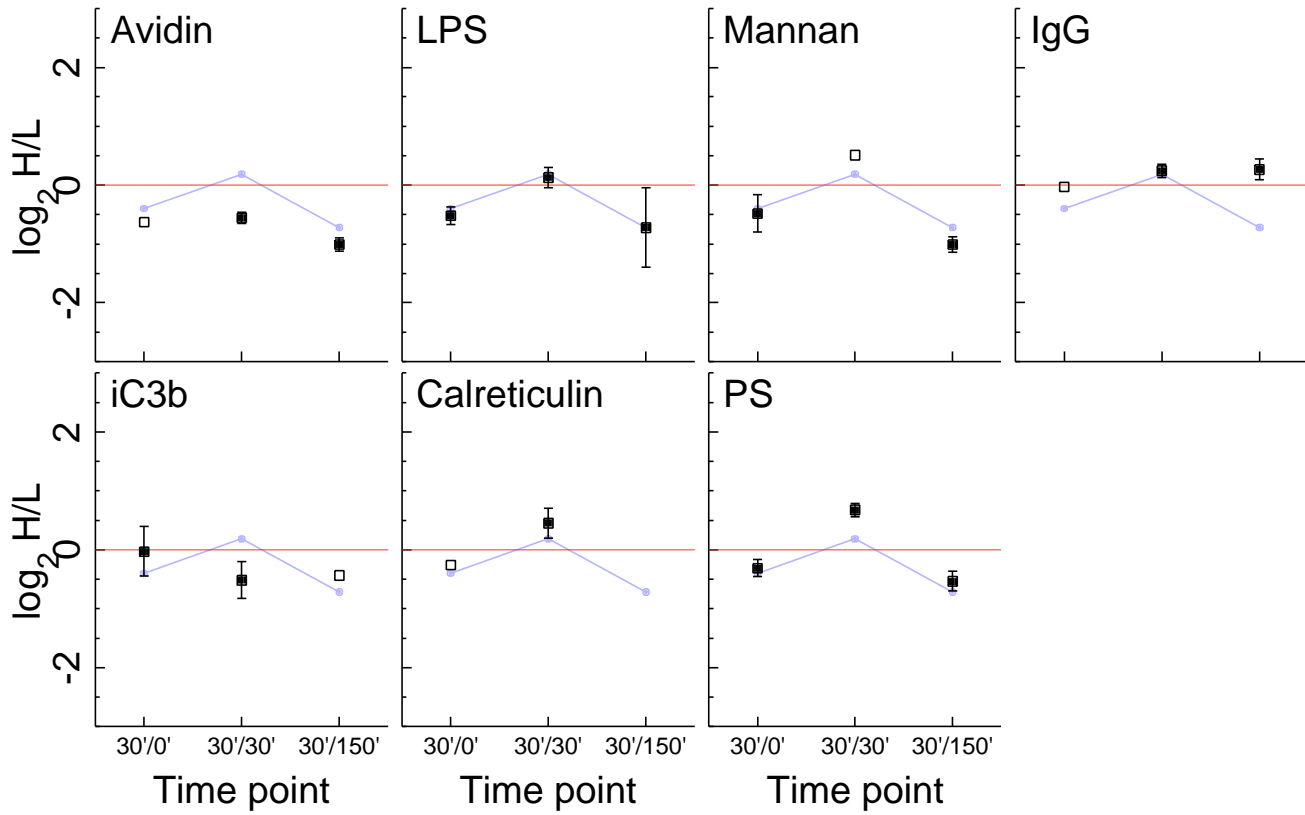

### cux1 (H3BJQ9)

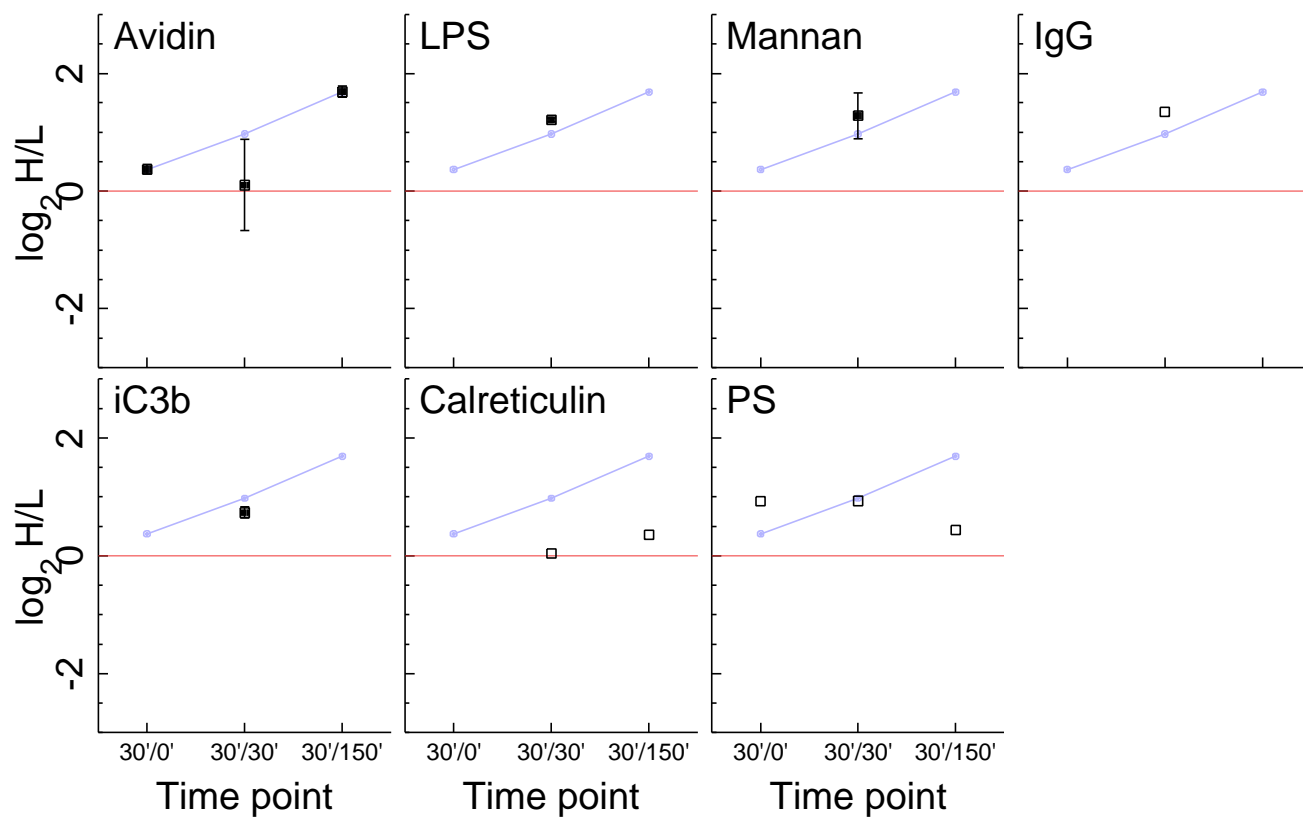

cwc15 (Q9JHS9)

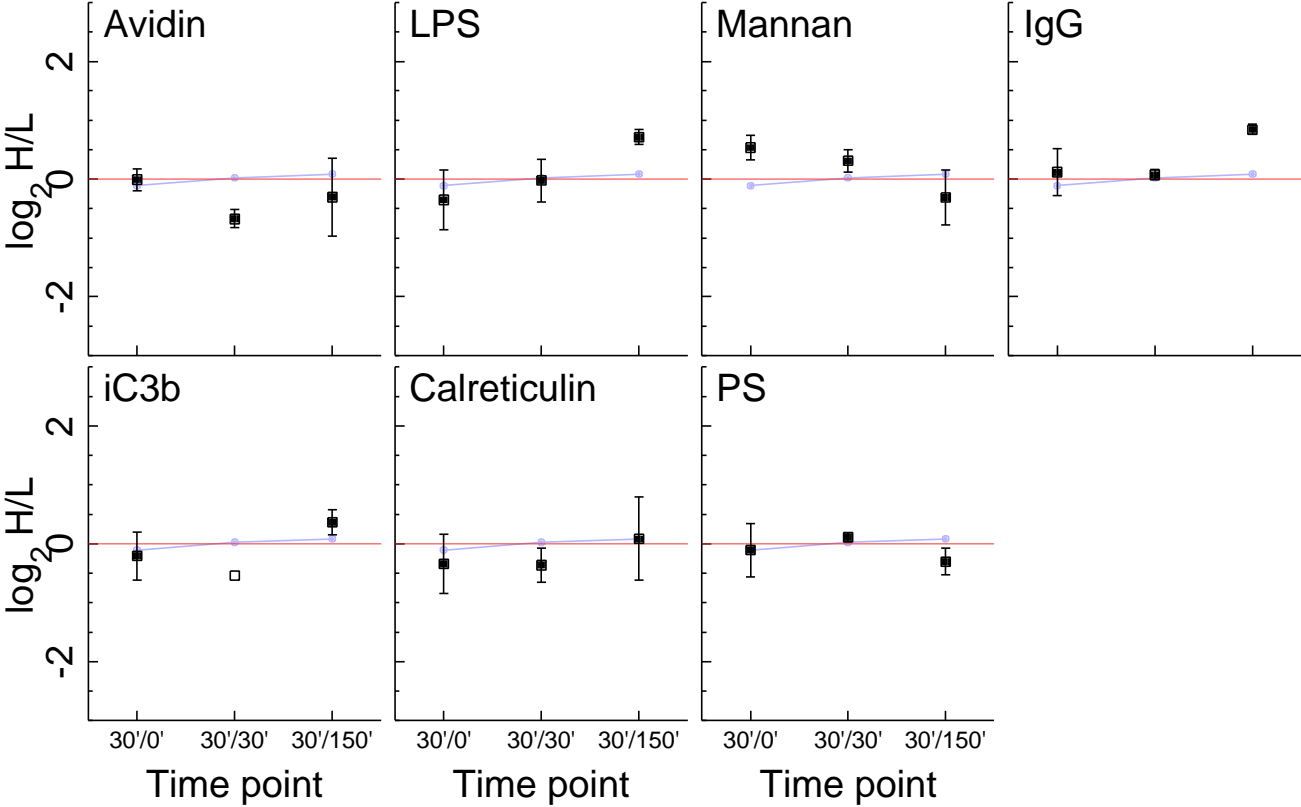



### cxcl2 (P10889)

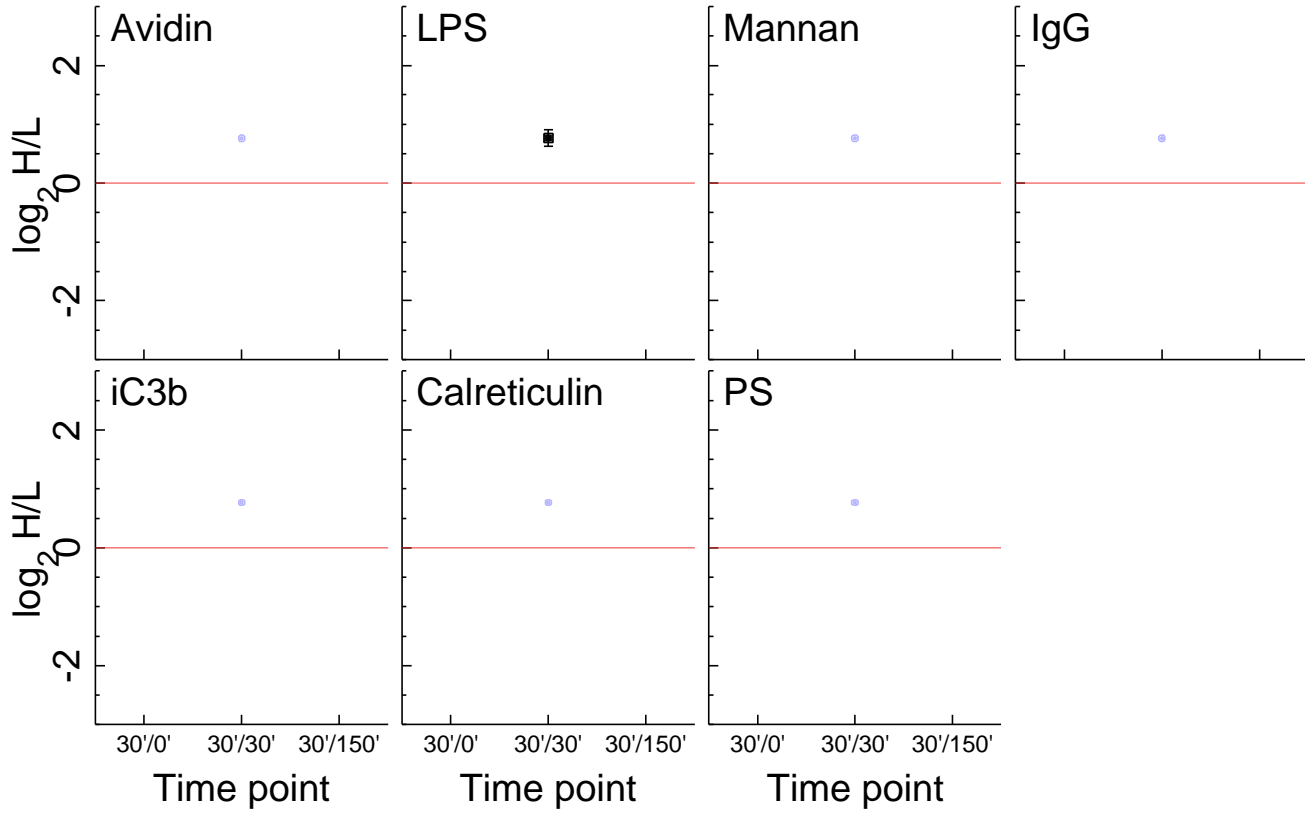

### cyb5a (P56395)

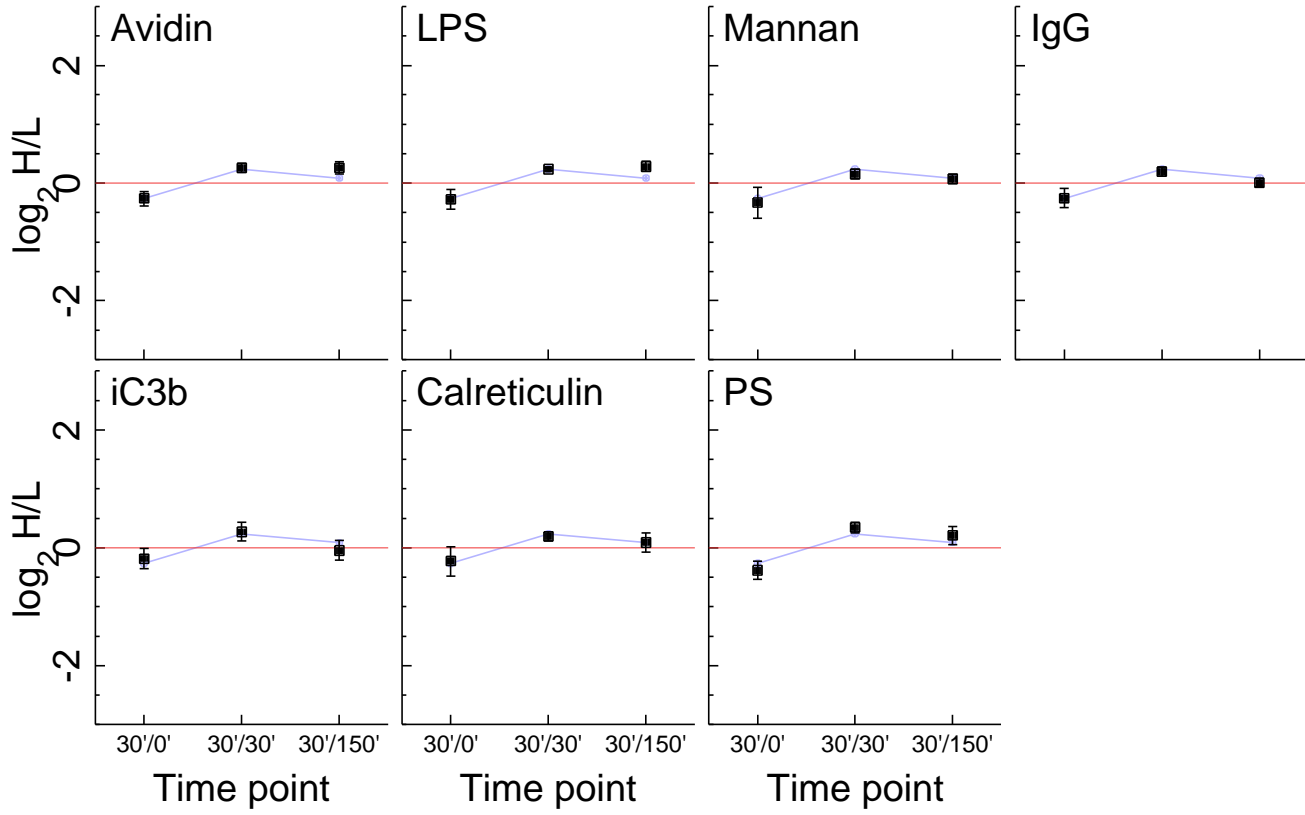

### cyb5b (Q9CQX2)

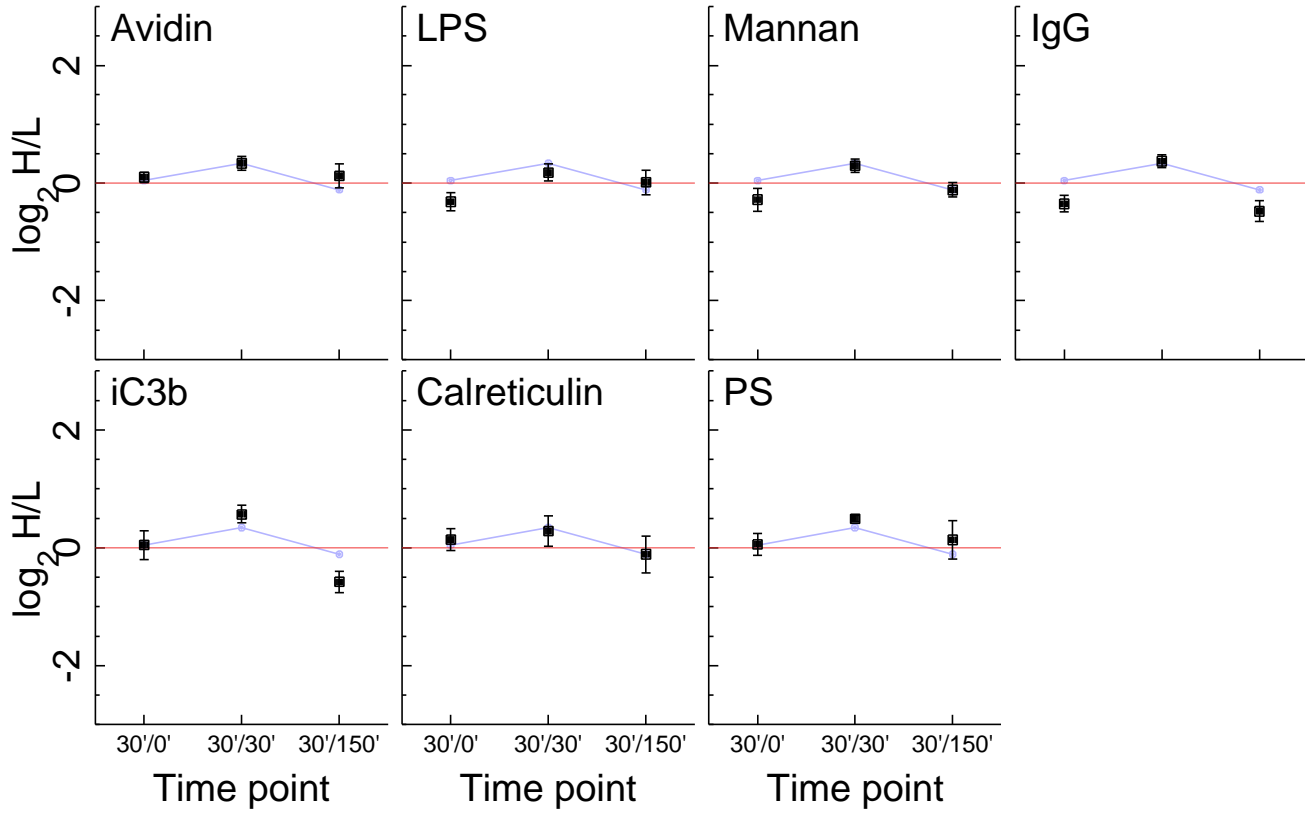

### cyb5r3 (Q9DCN2)

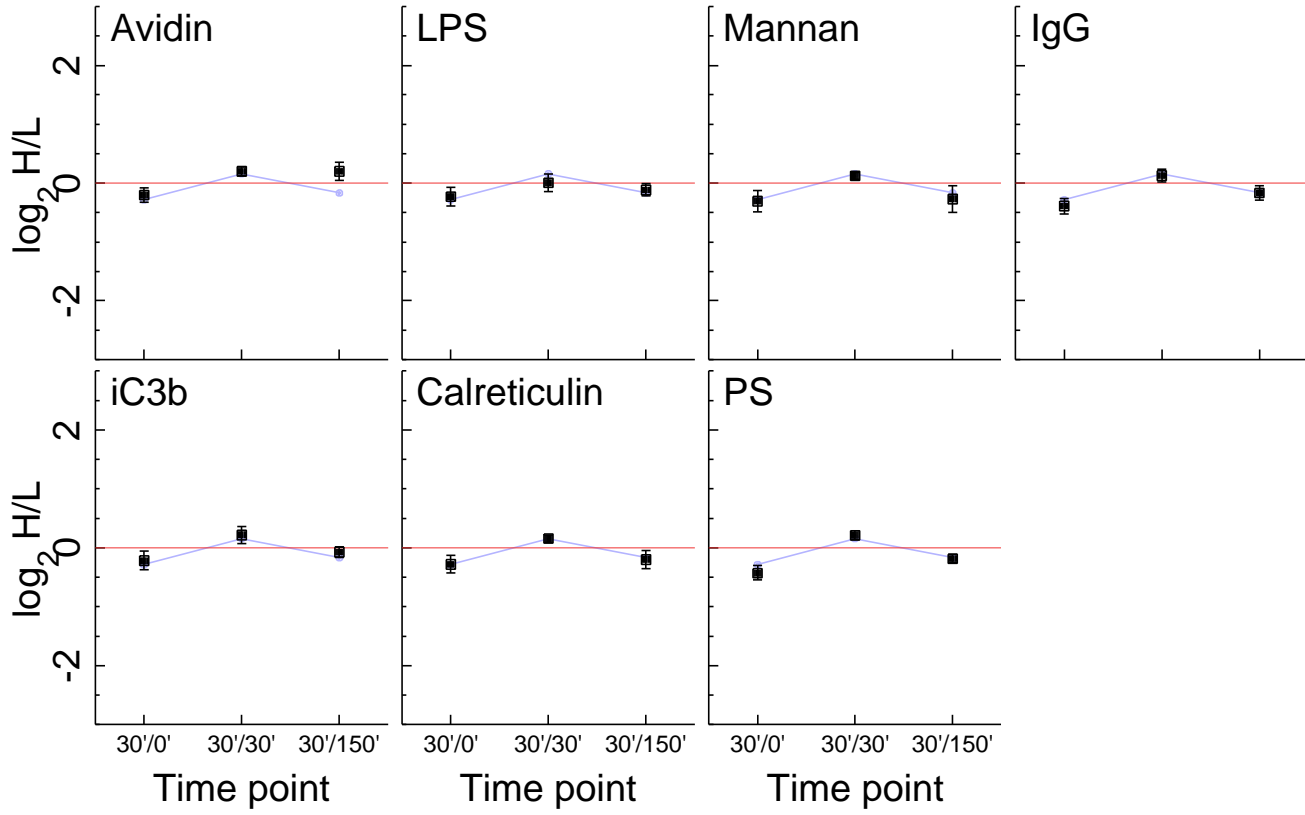

cyba (Q61462)

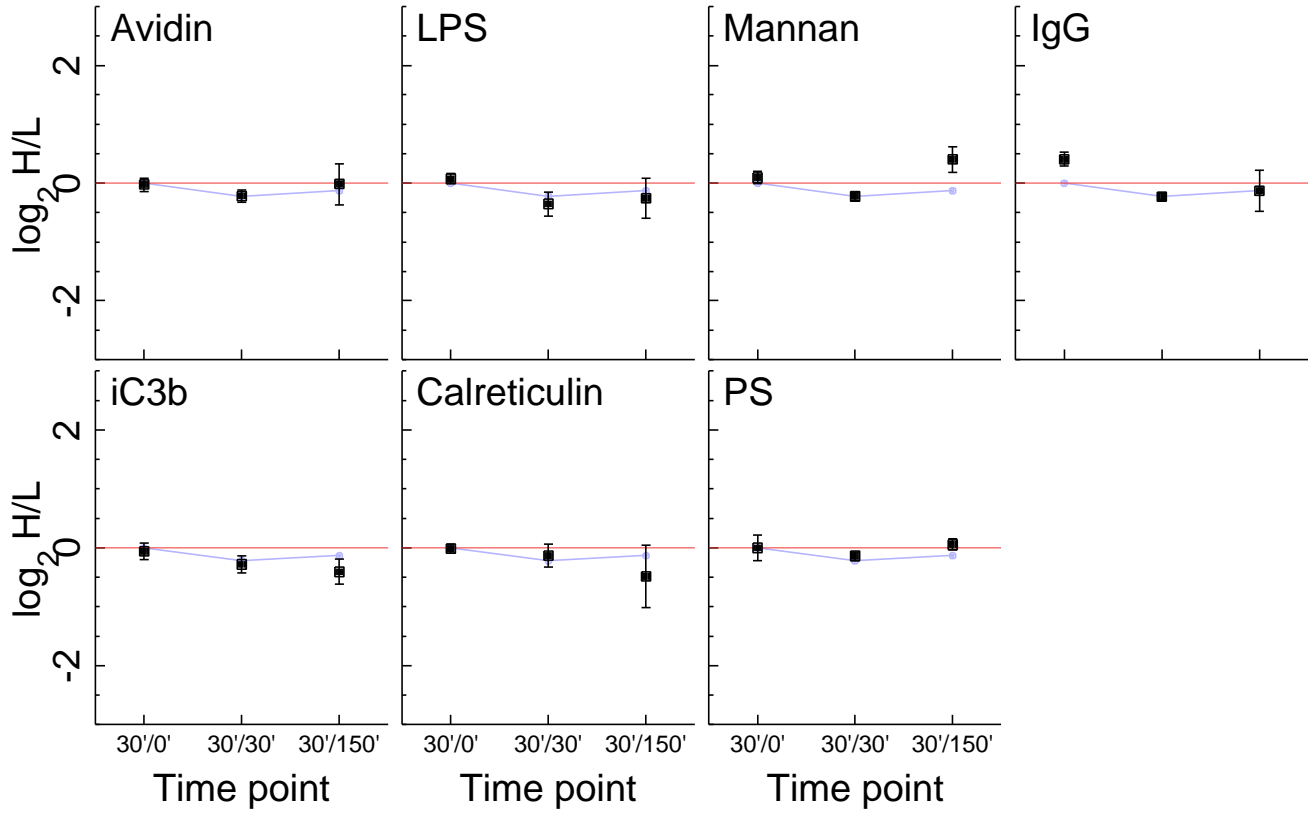

cybb (Q61093)

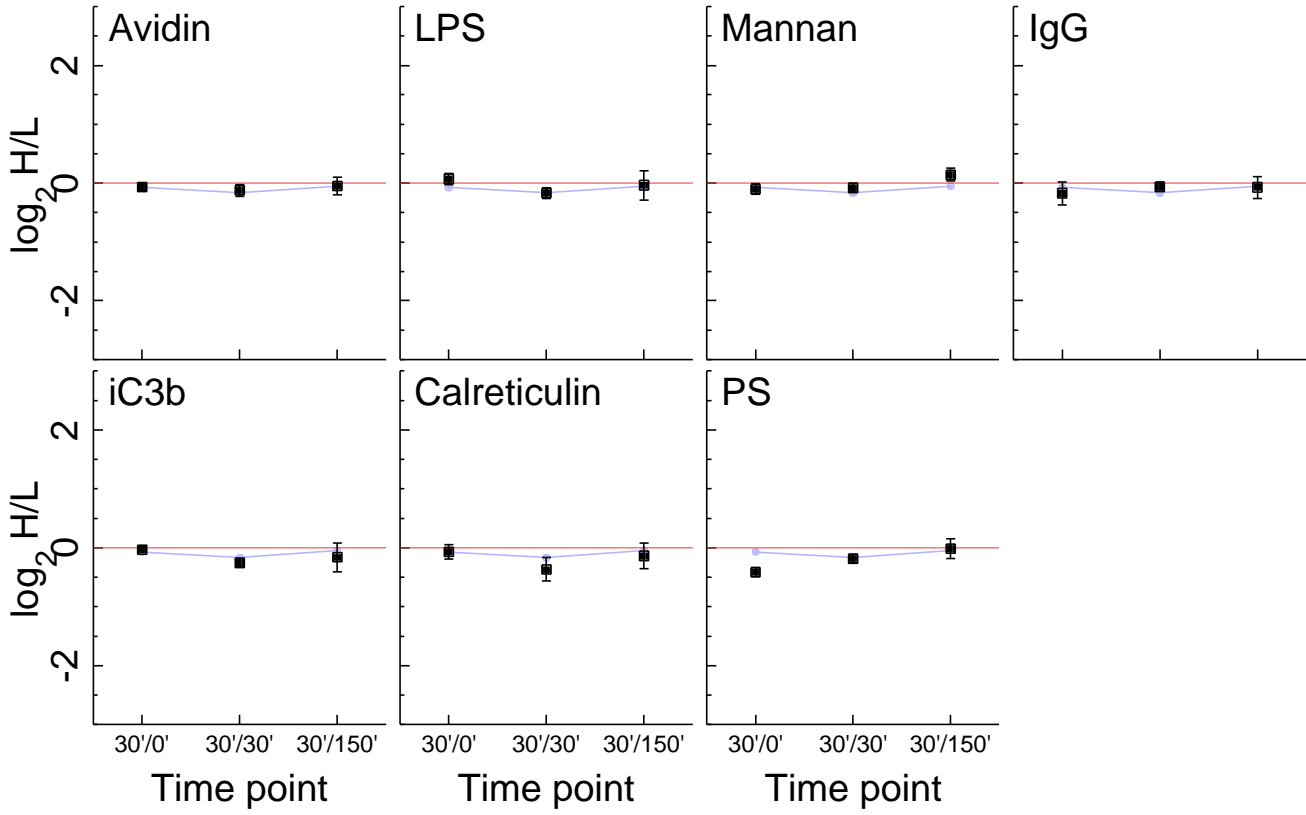

cyc1 (Q9D0M3)

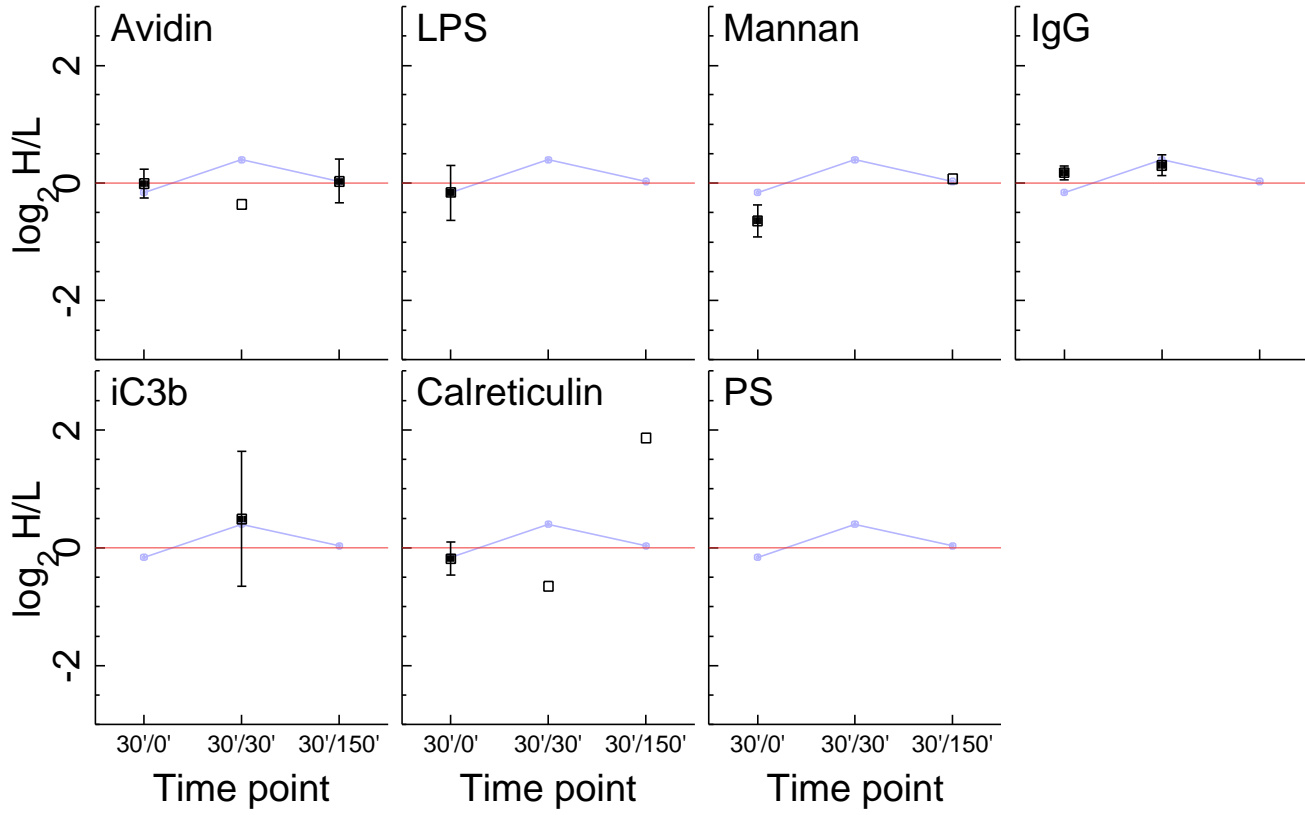

cyfip1 (Q7TMB8)

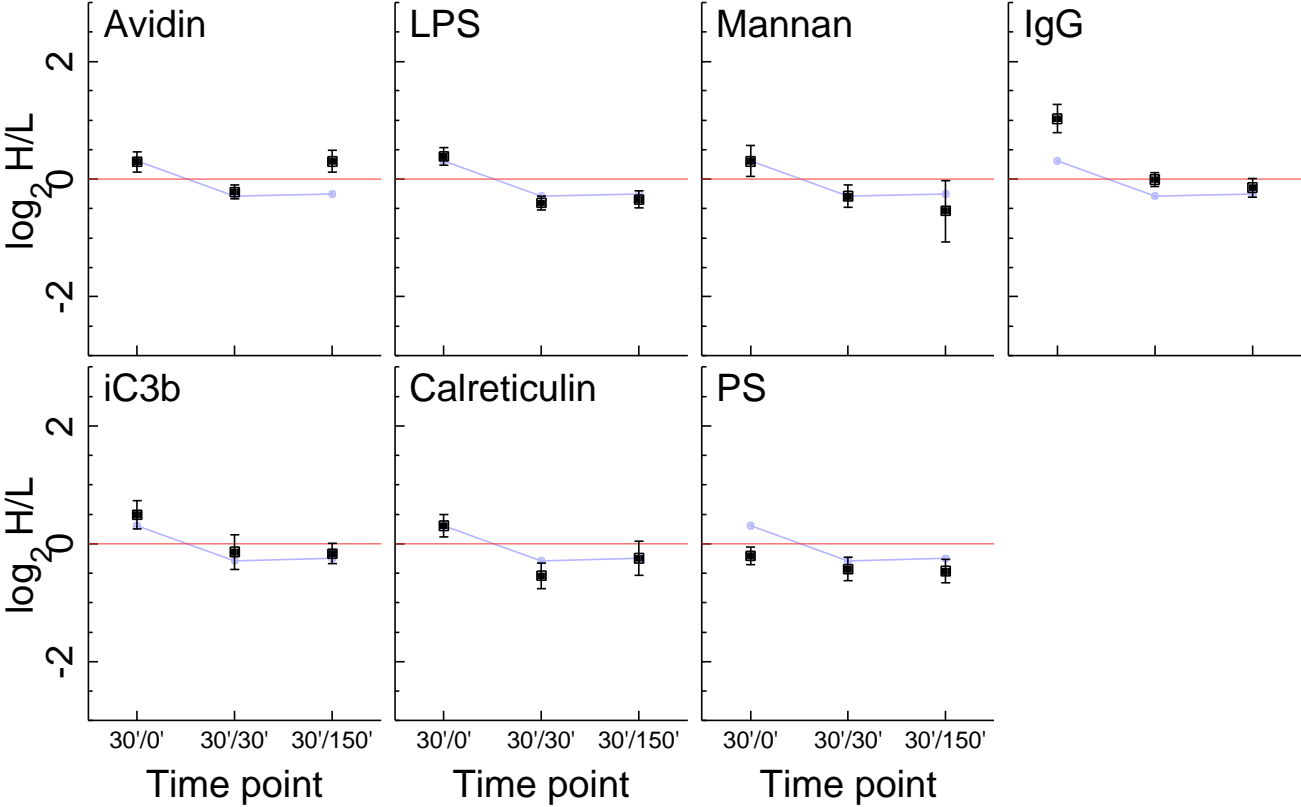



### cyp20a1 (Q8BKE6)

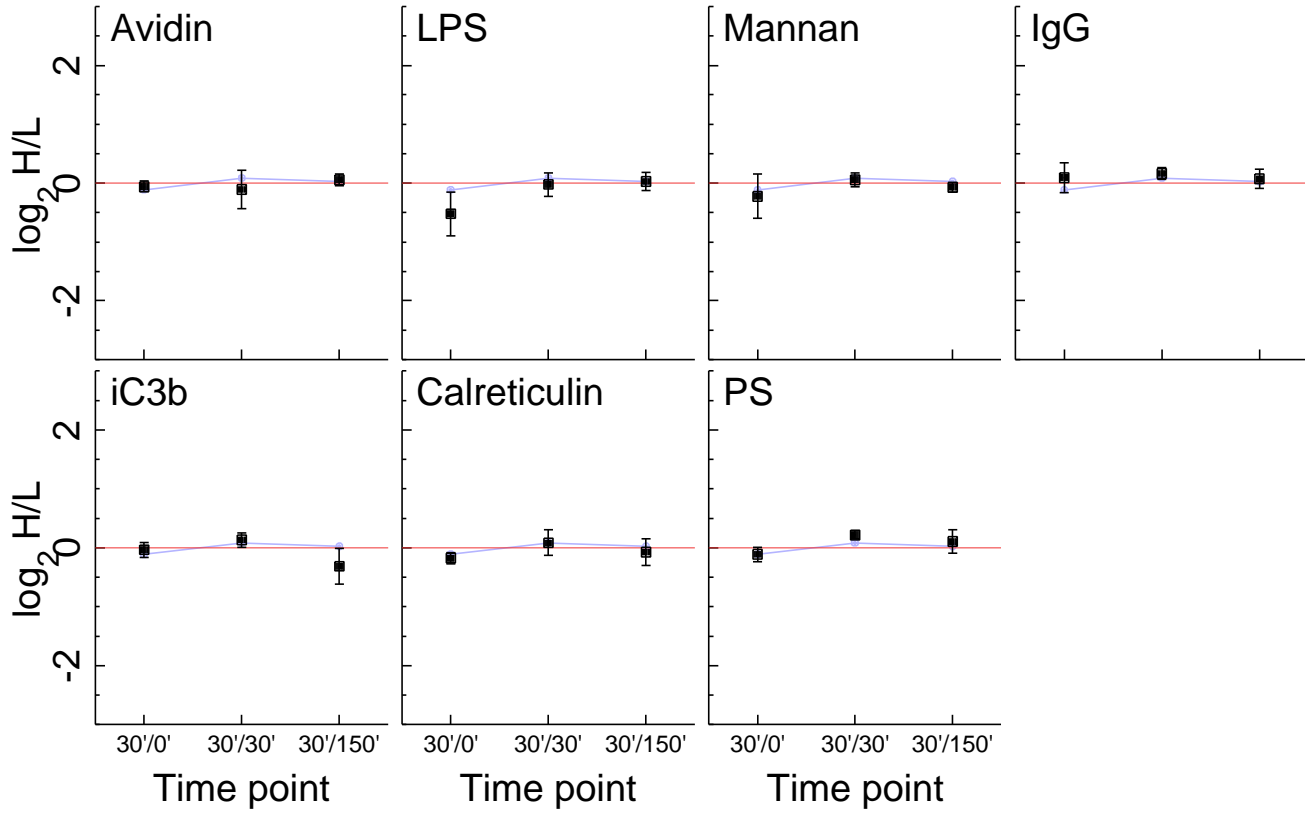

### d10jhu81e (Q9D172)

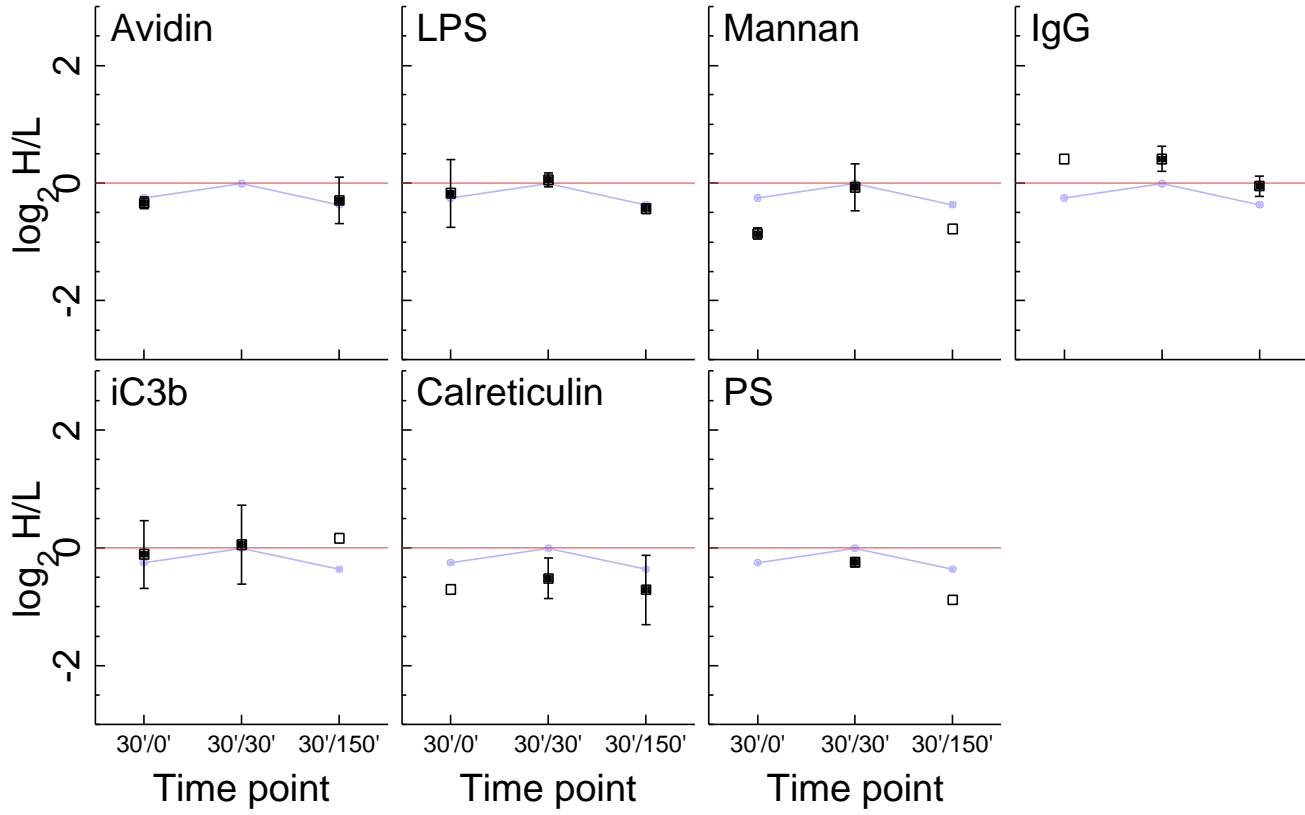

d10wsu52e (Q99LF4)

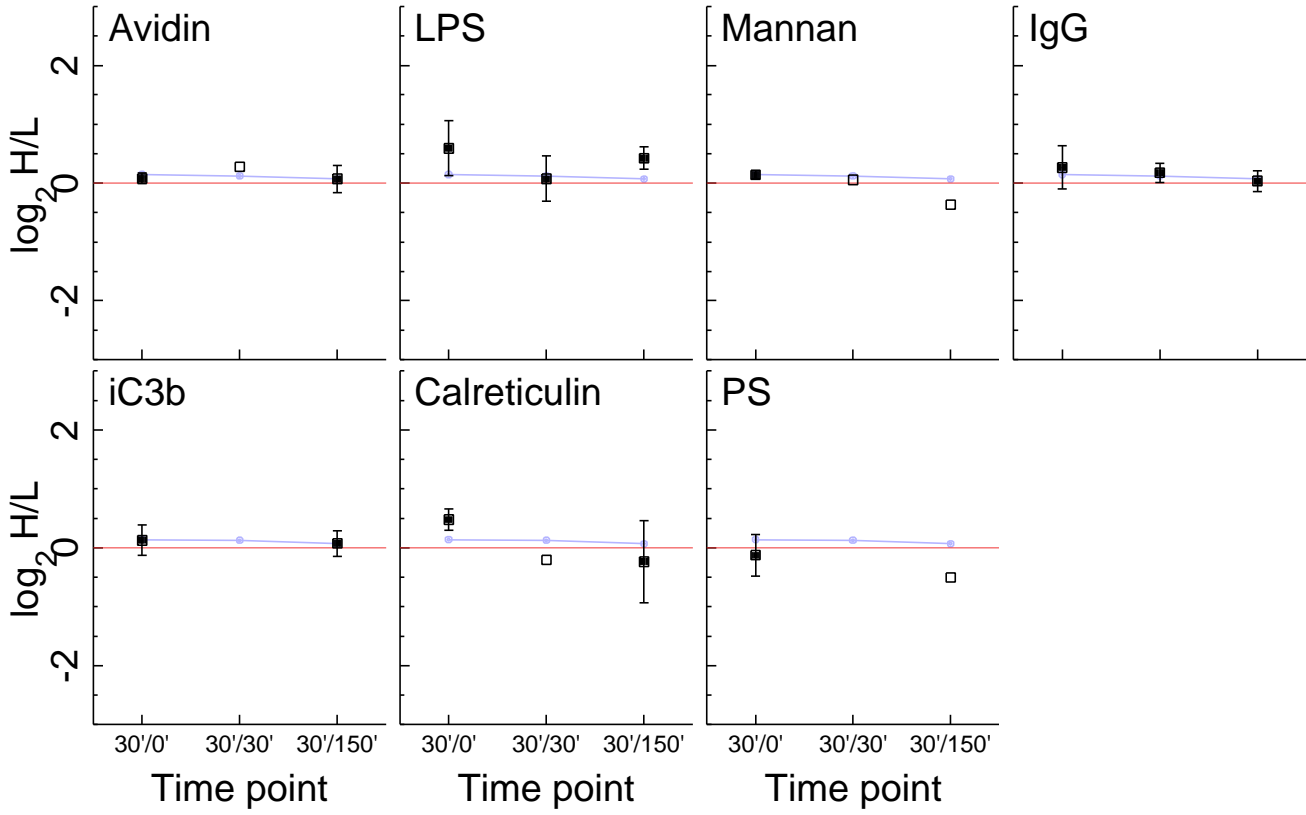

### d17wsu104e (Q9CPT4)

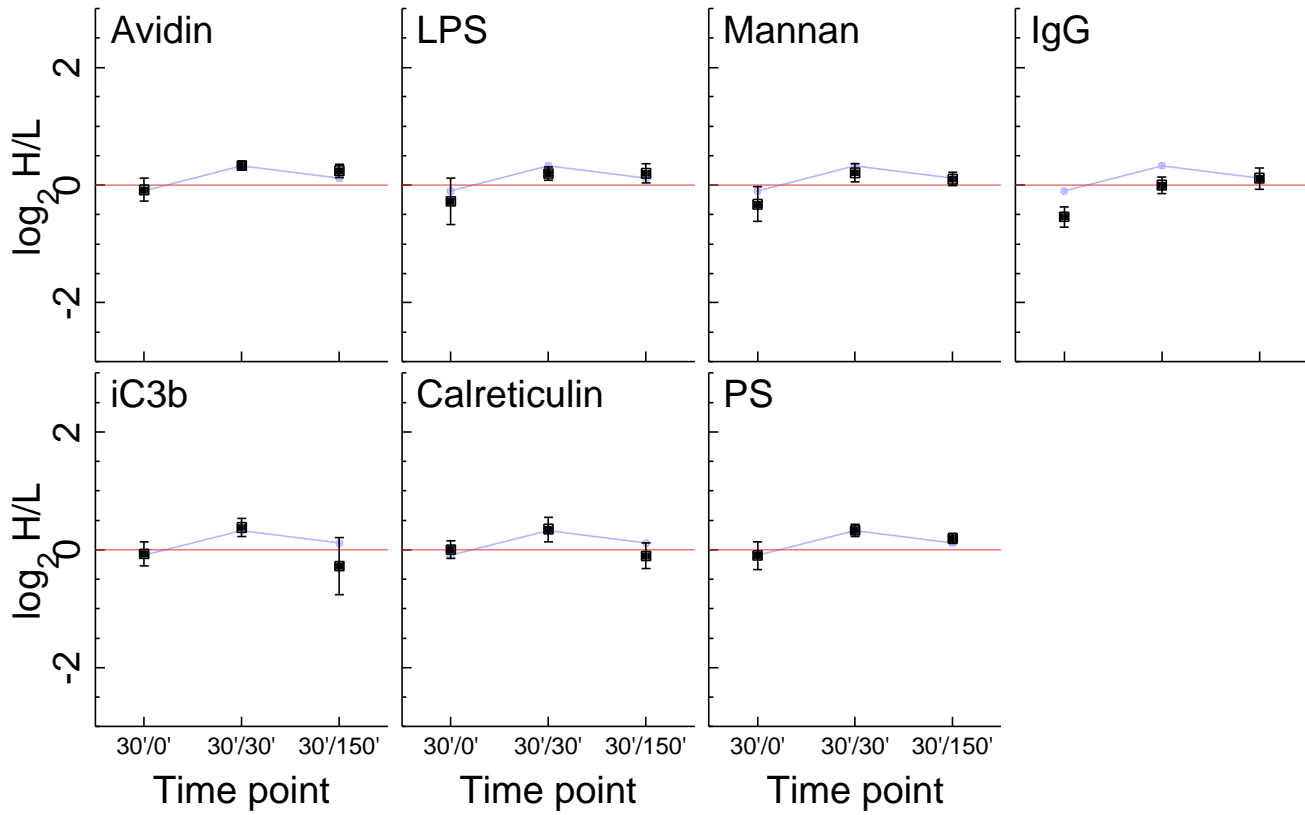

dab2 (P98078)

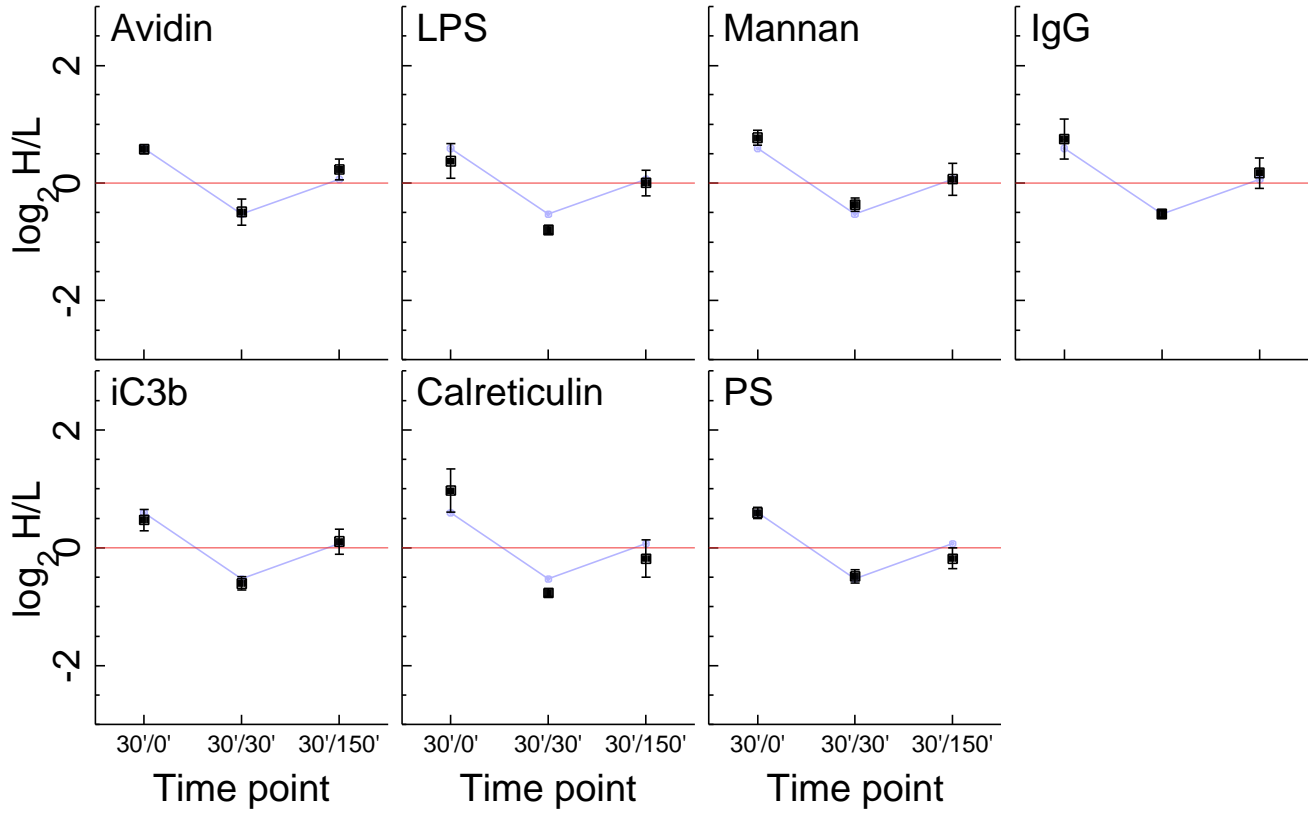

### dad1 (P61804)

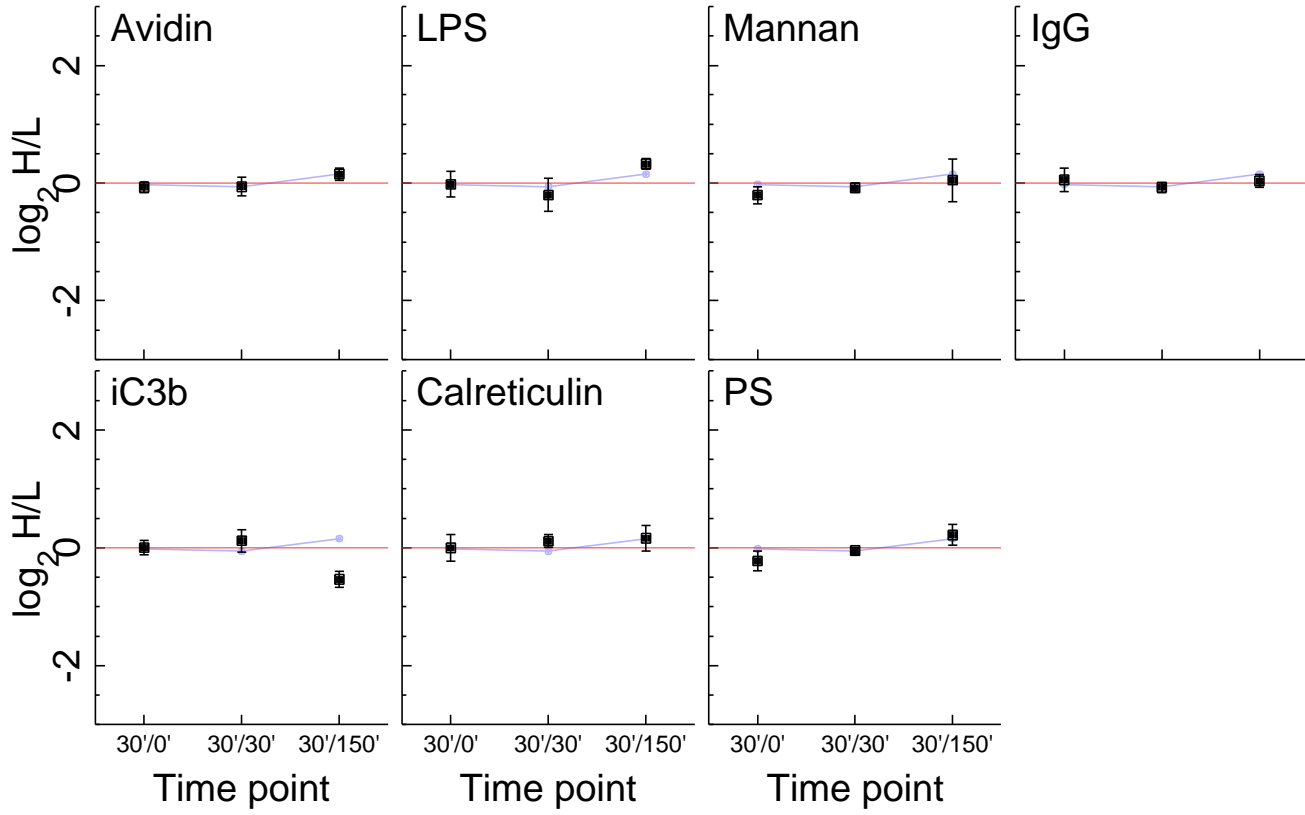

daglb (Q91WC9)

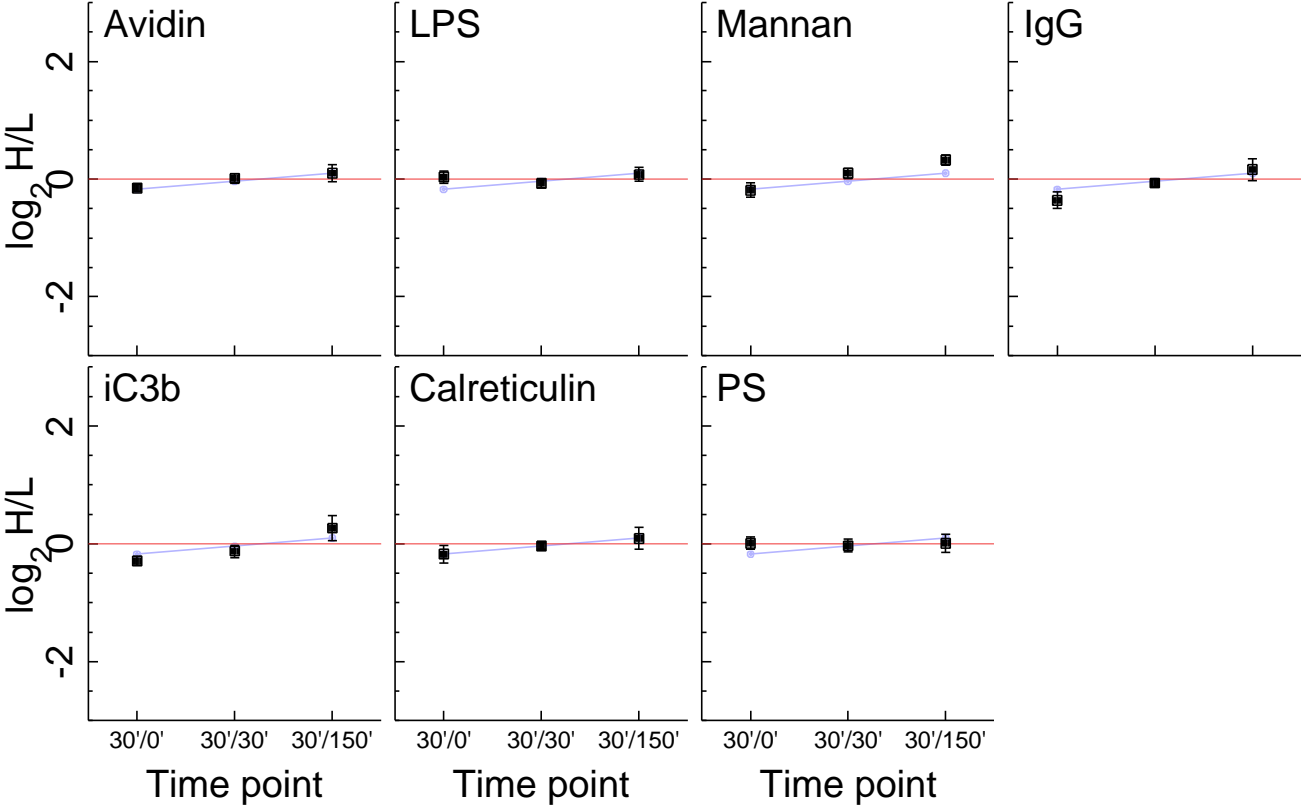

dars (Q922B2)

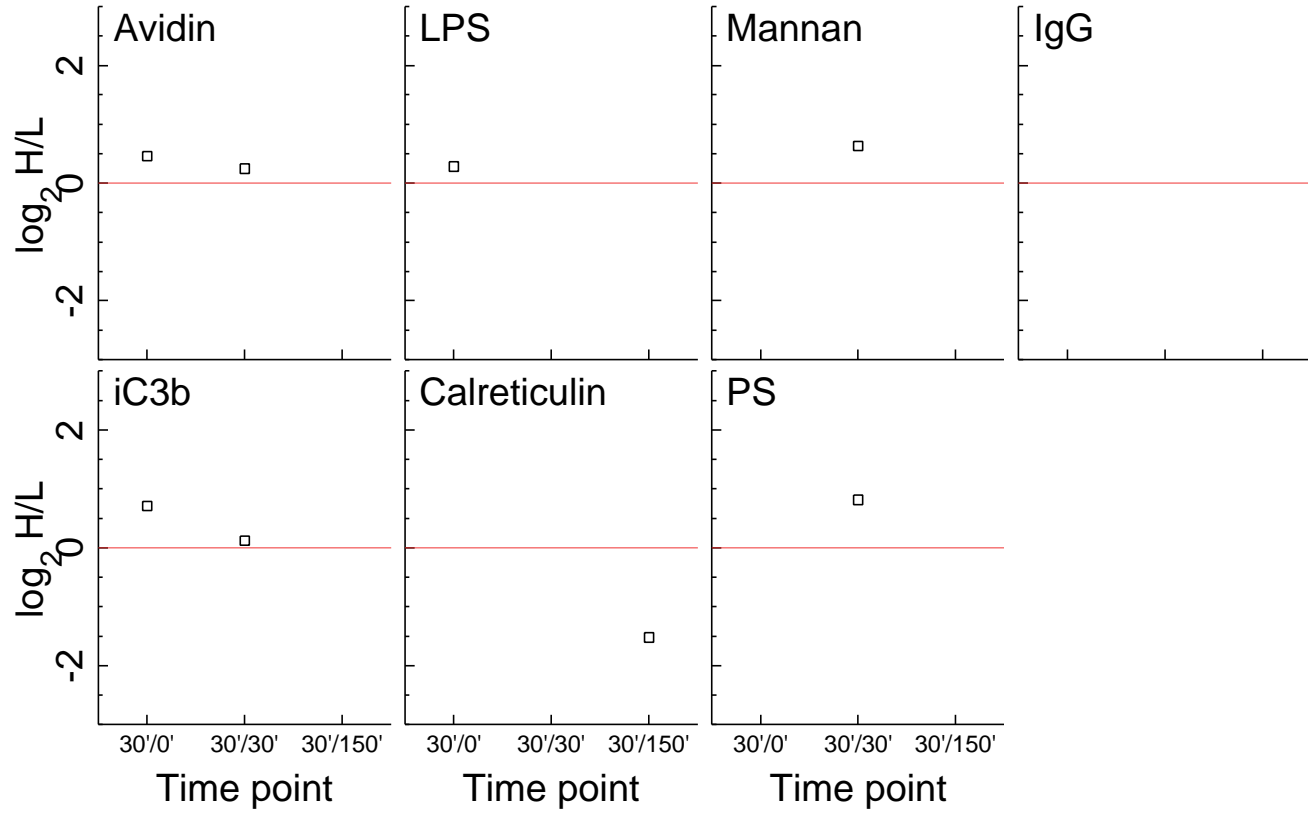



dbi (F6ZM12)

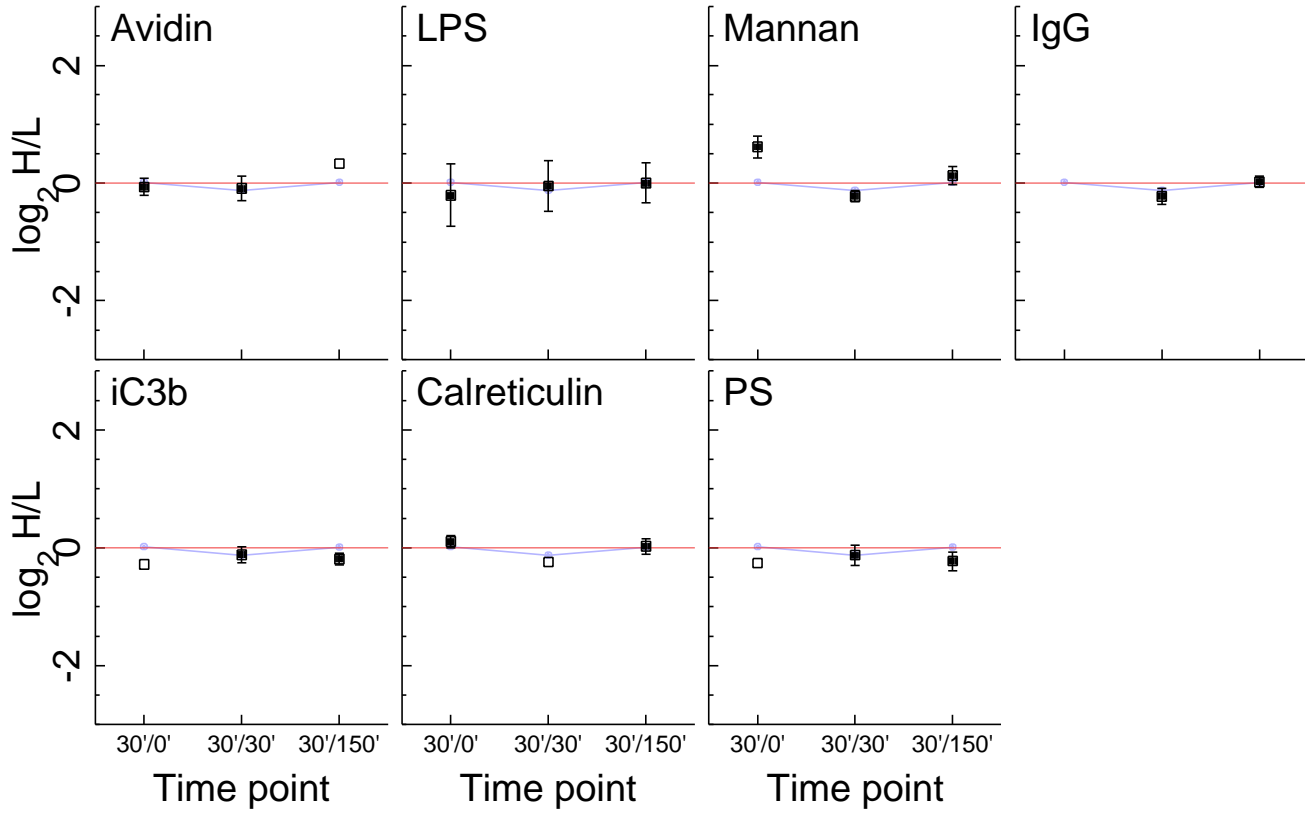

### dbr1 (Q923B1)

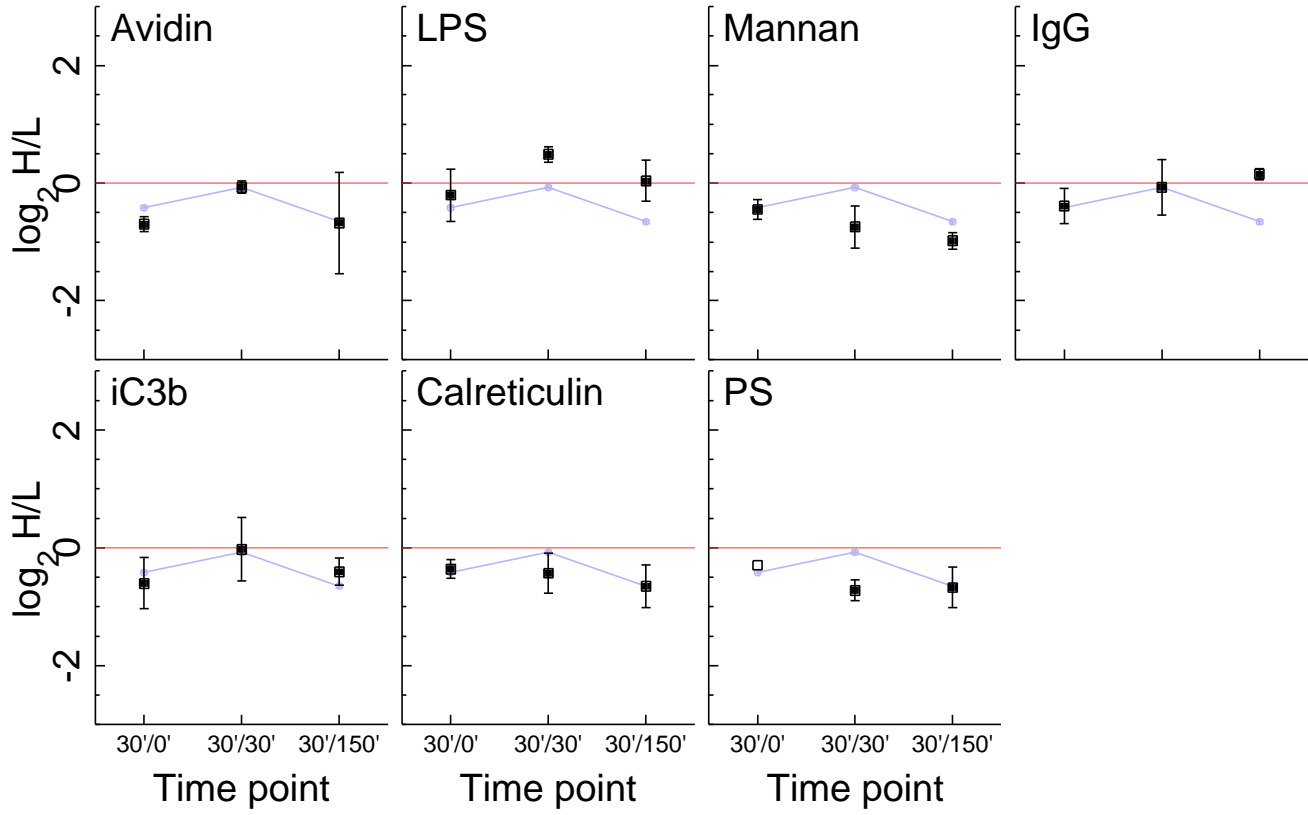

ddb1 (Q3U1J4)

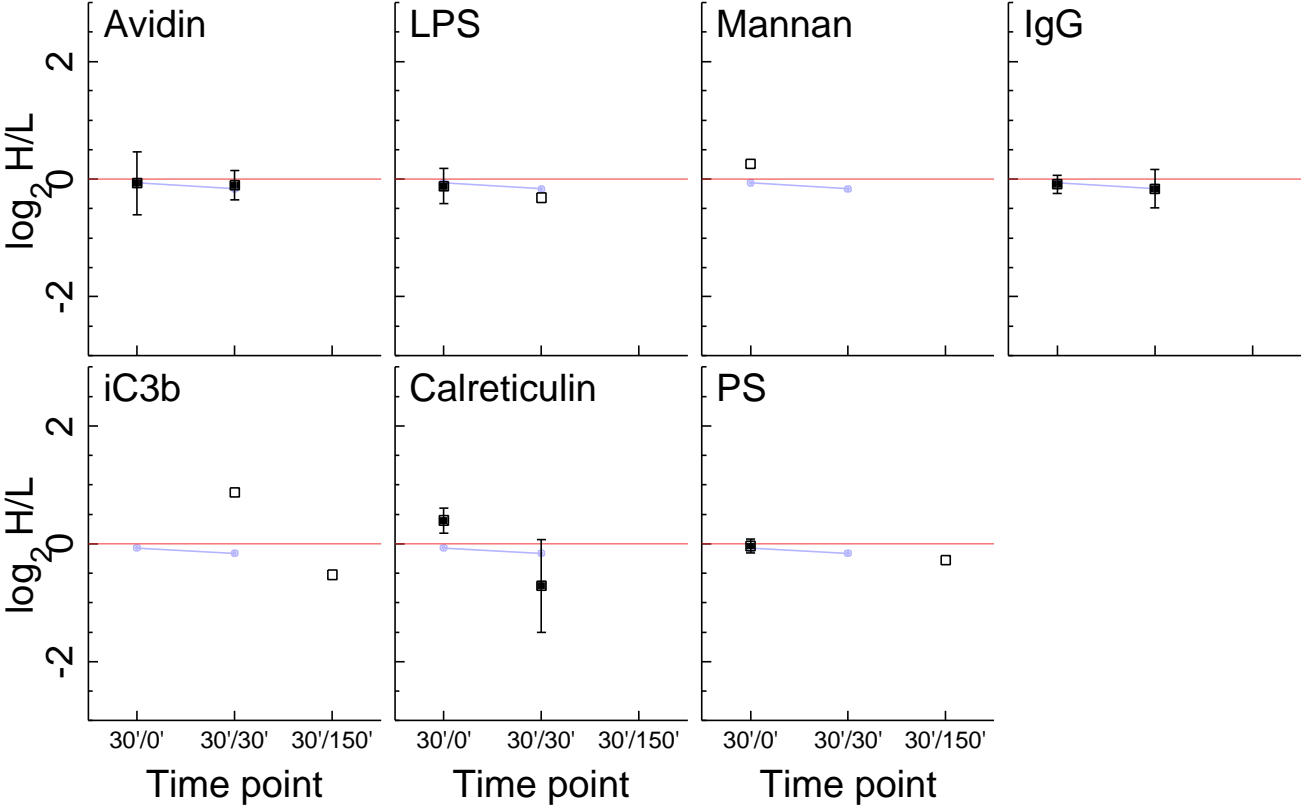

ddost (O54734)

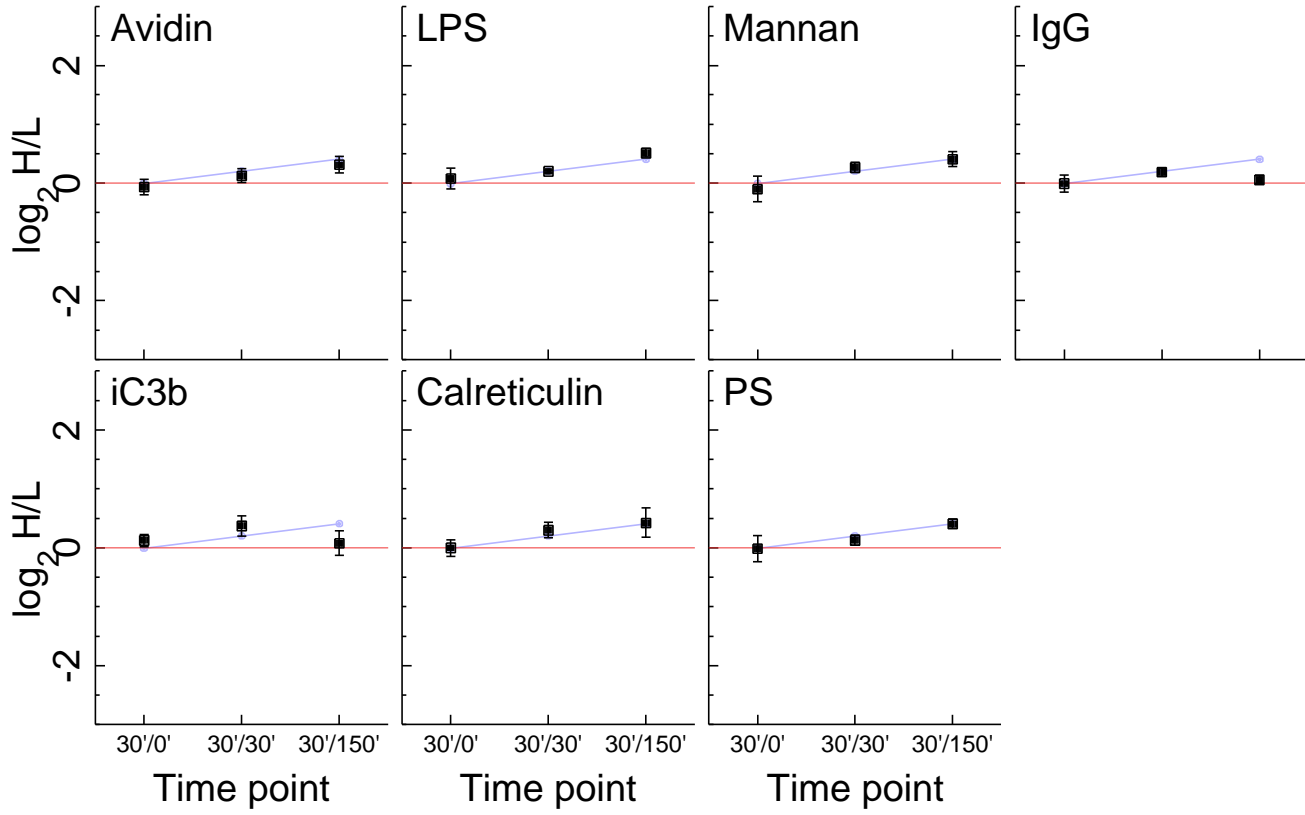

### ddrgk1 (Q80WW9)

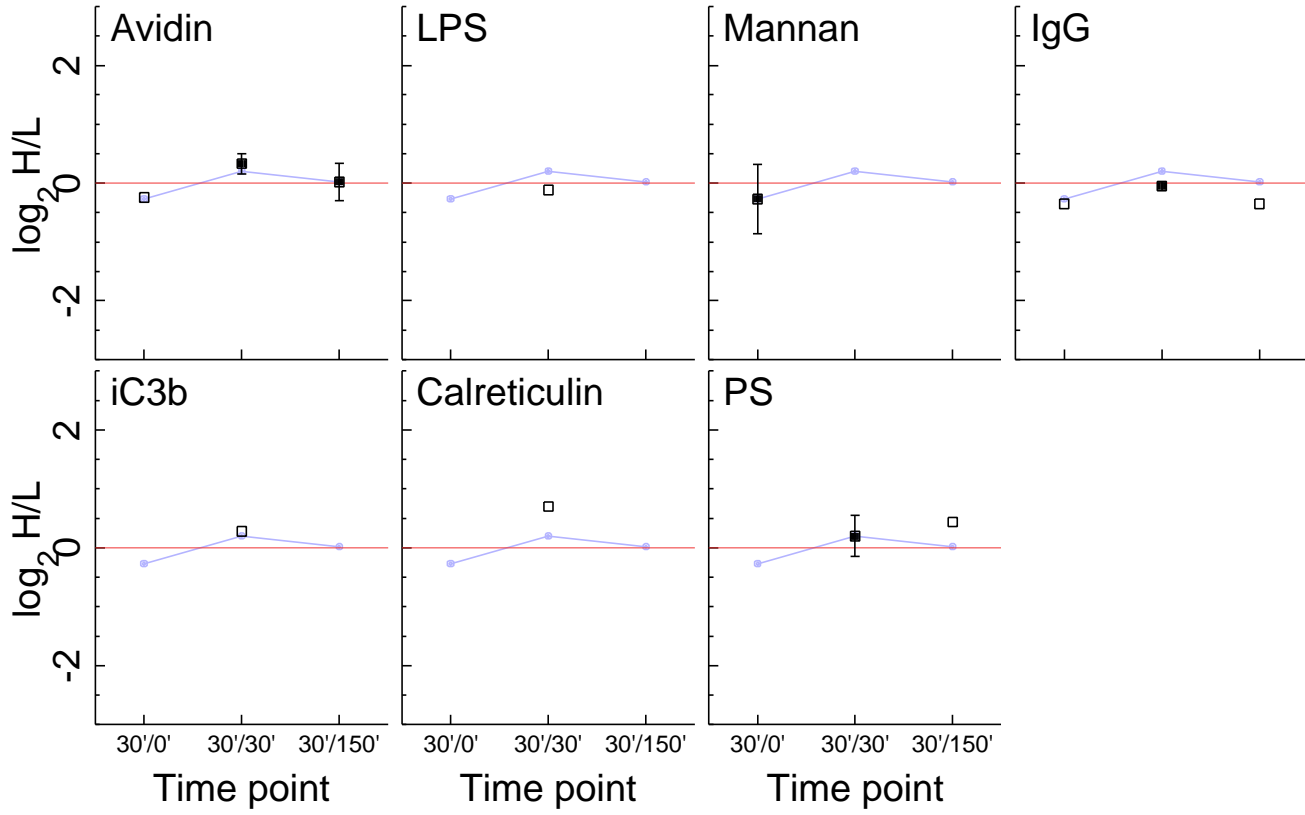

ddx1 (Q91VR5)

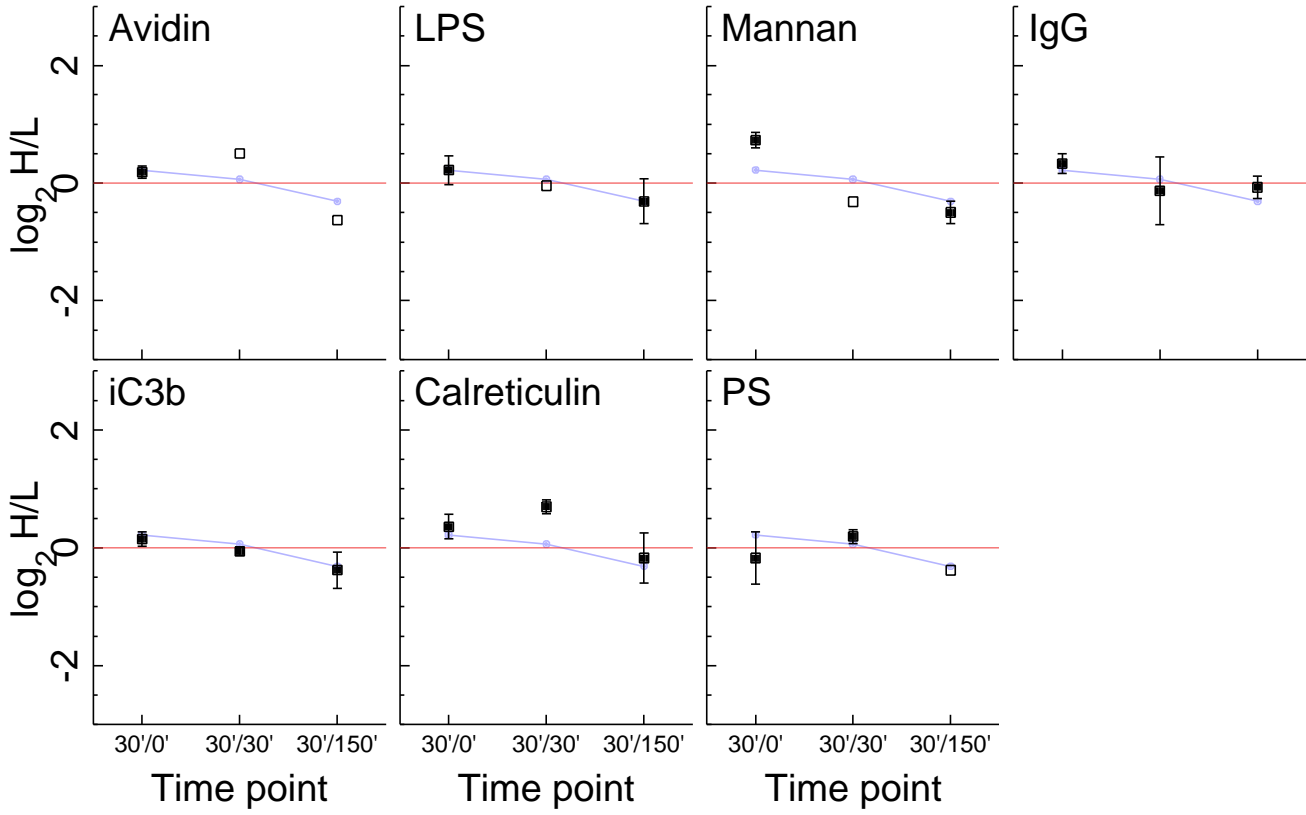

ddx39b (Q9Z1N5)

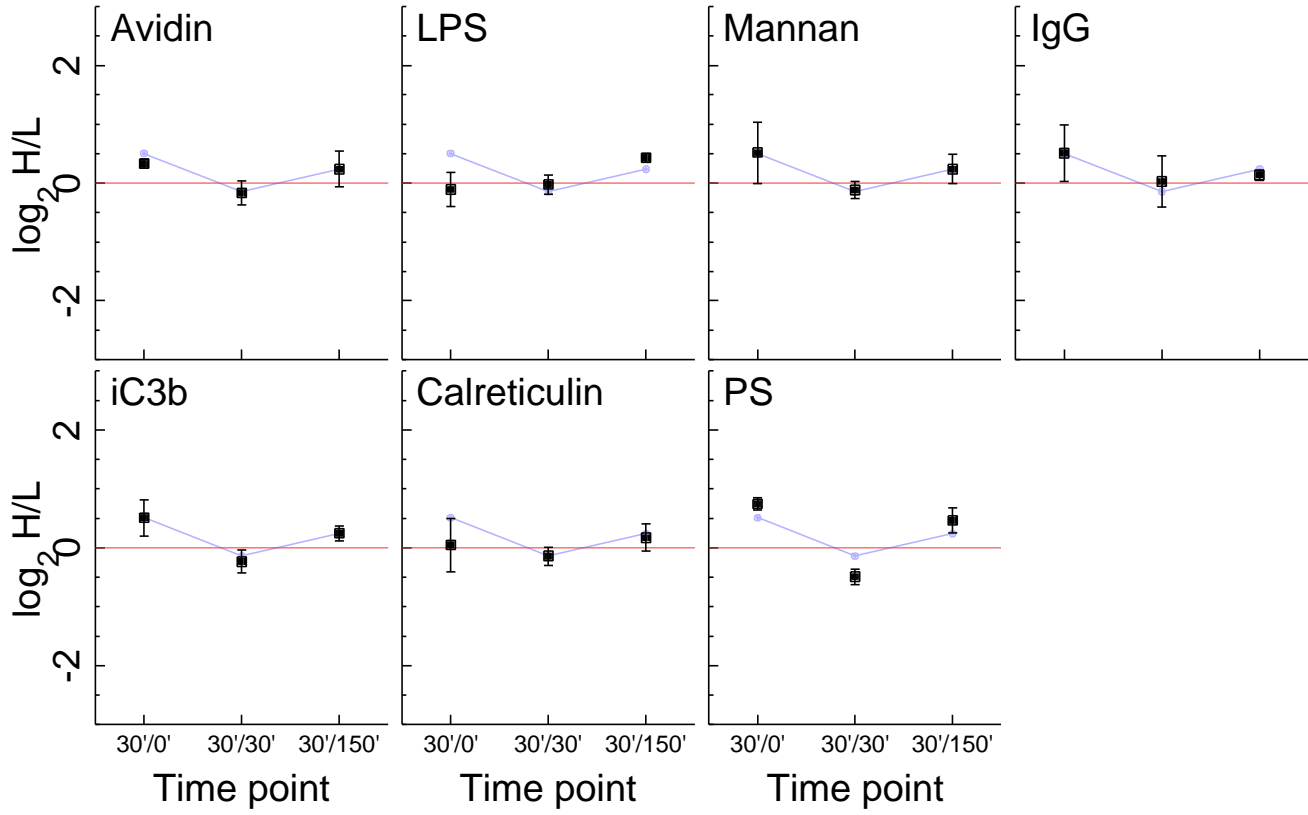

ddx3x (Q62167)

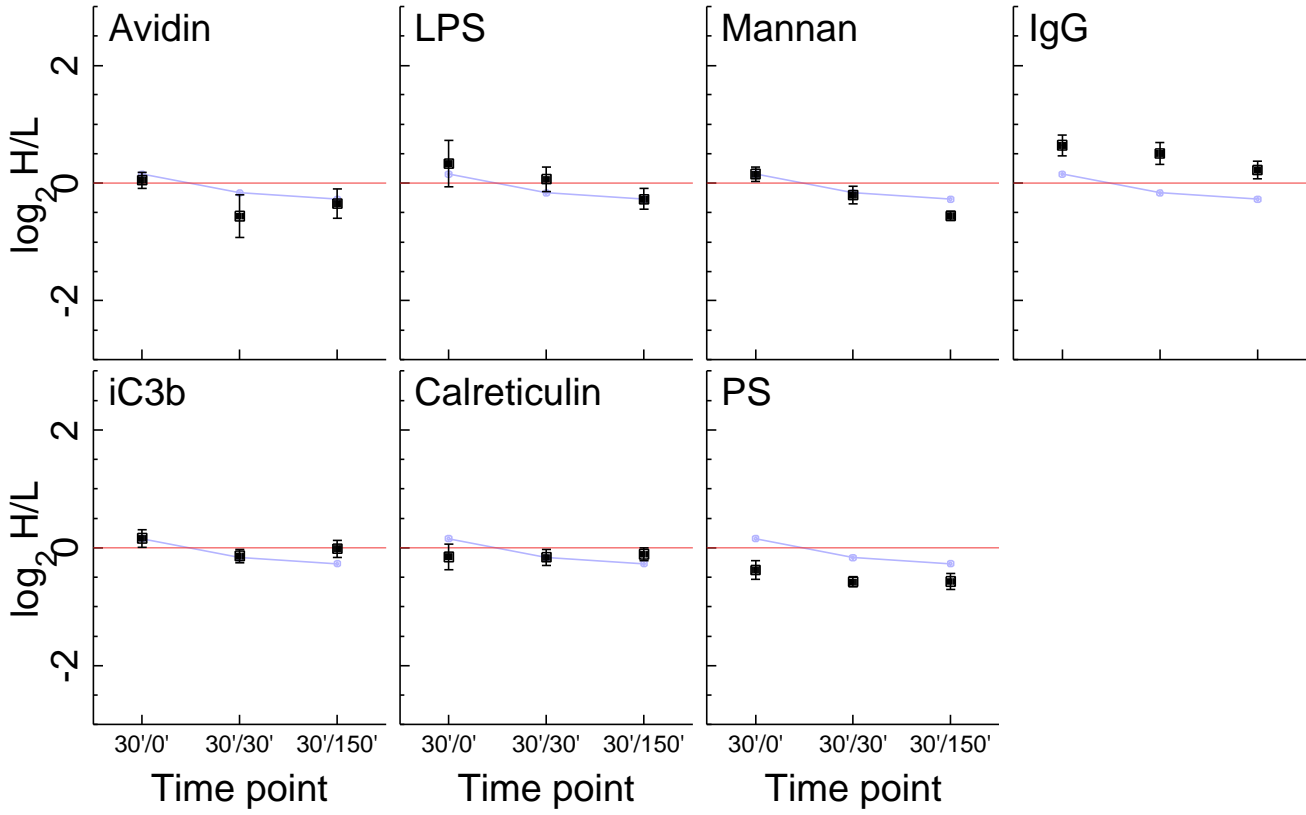



ddx3y (Q62095)

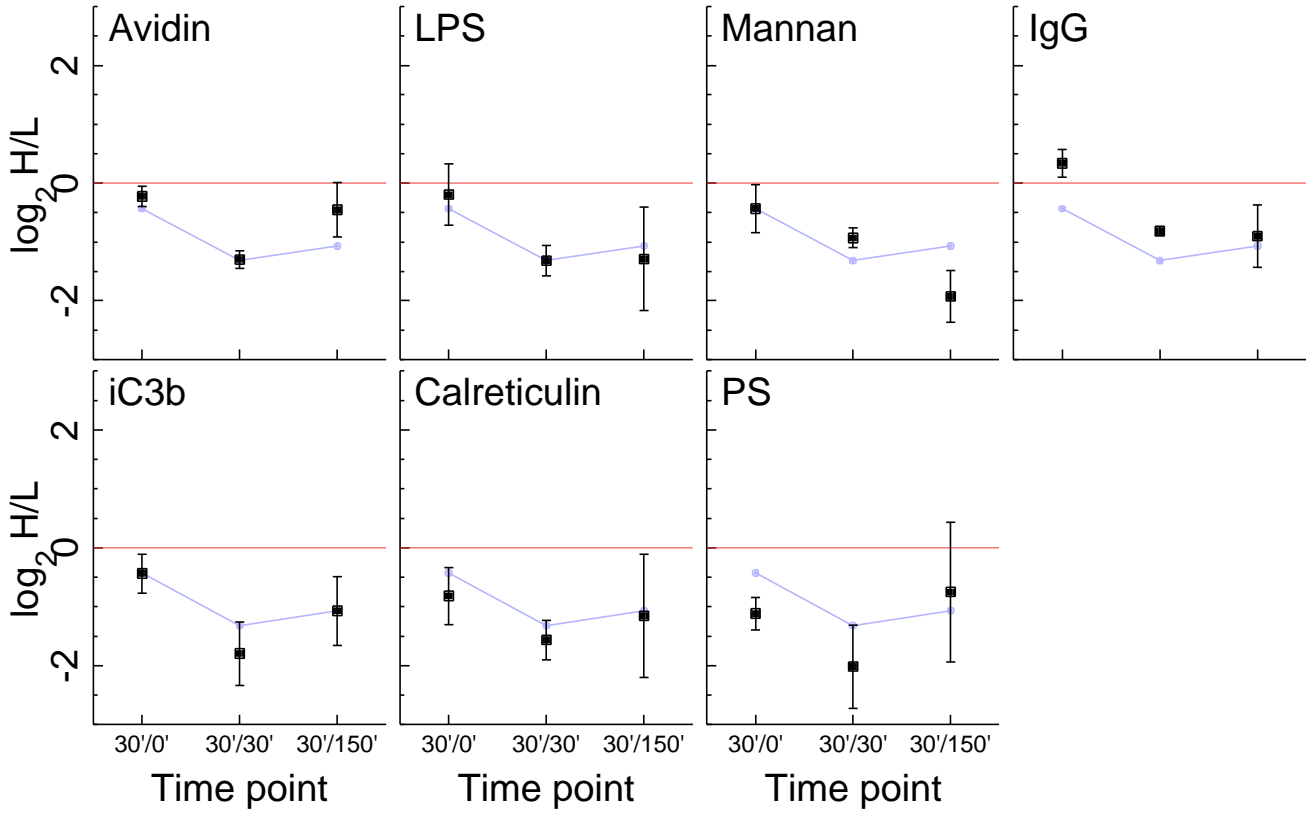

### ddx42 (Q810A7)

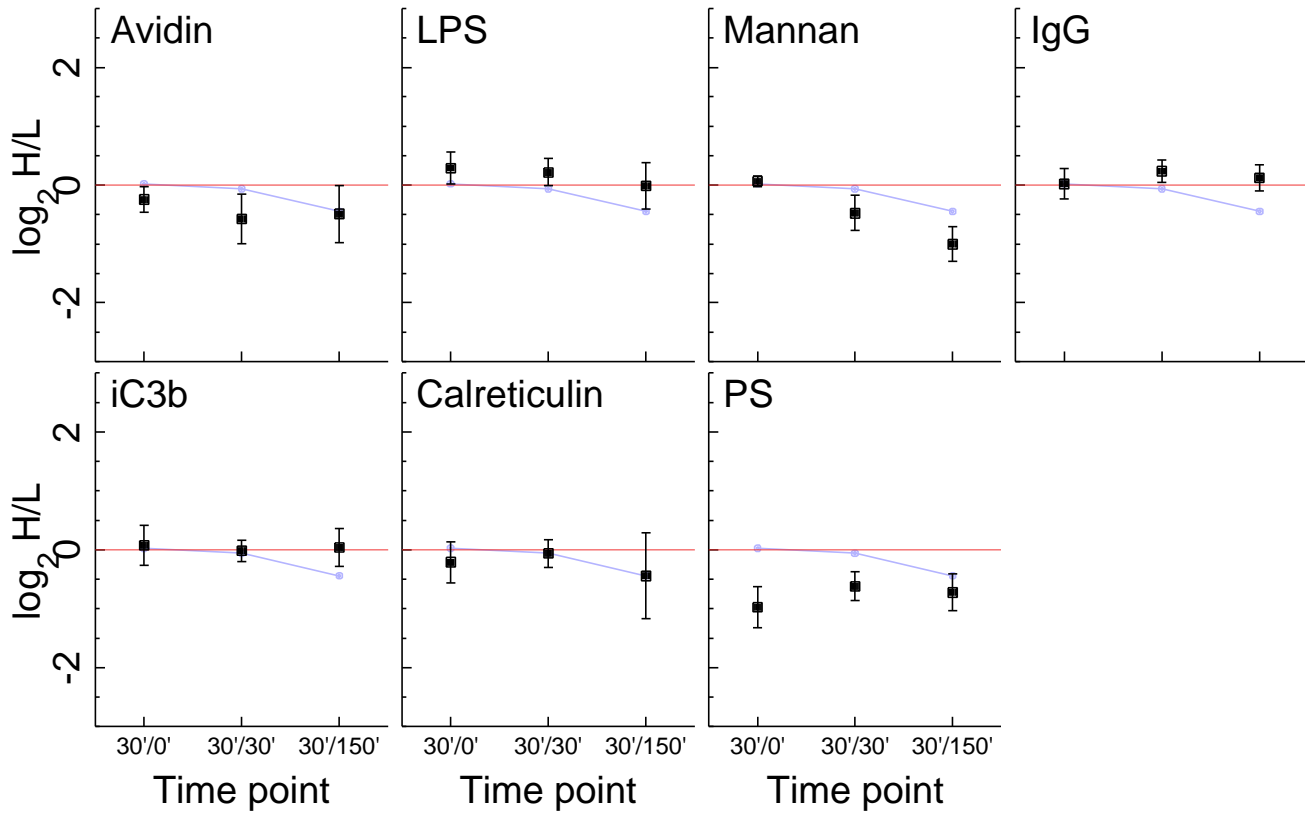

ddx46 (Q569Z5)

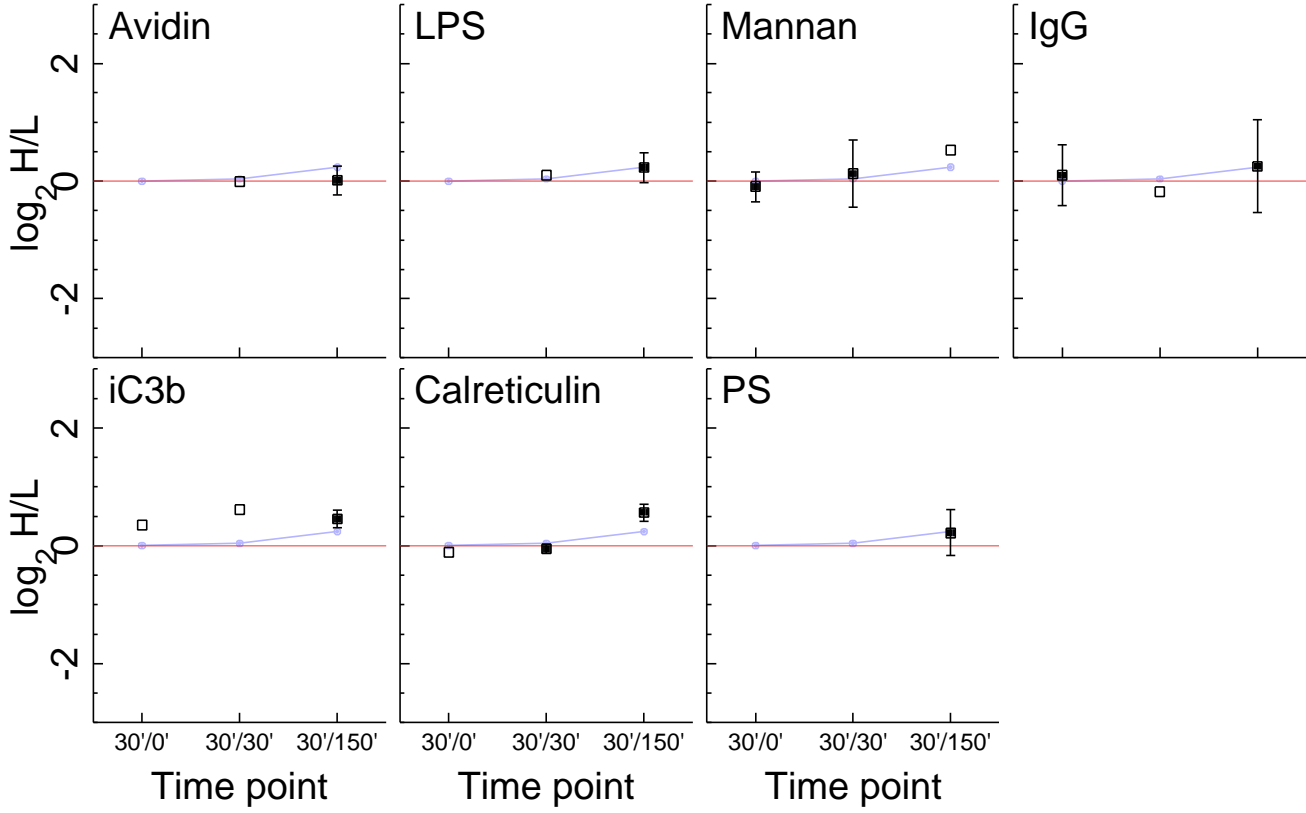

ddx5 (Q8BTS0)

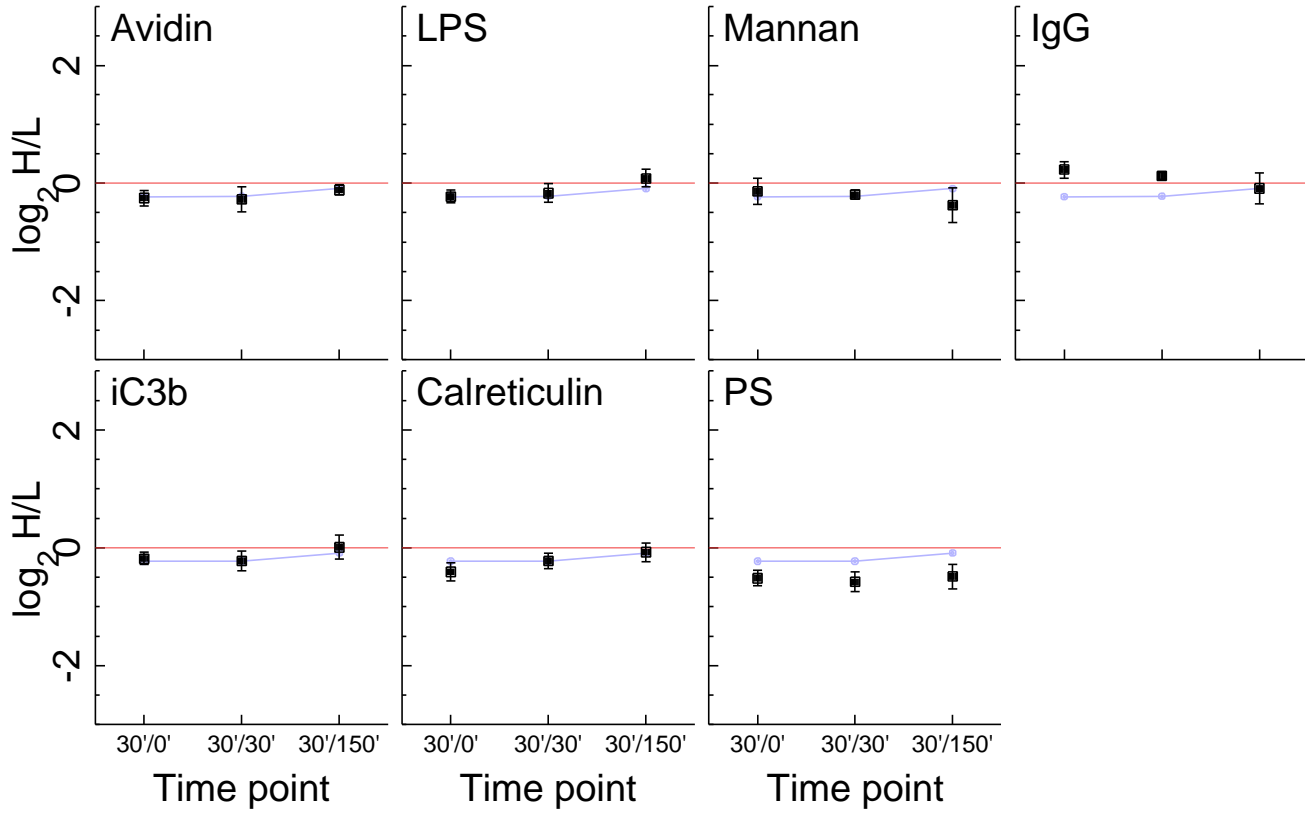

decr1 (Q9CQ62)

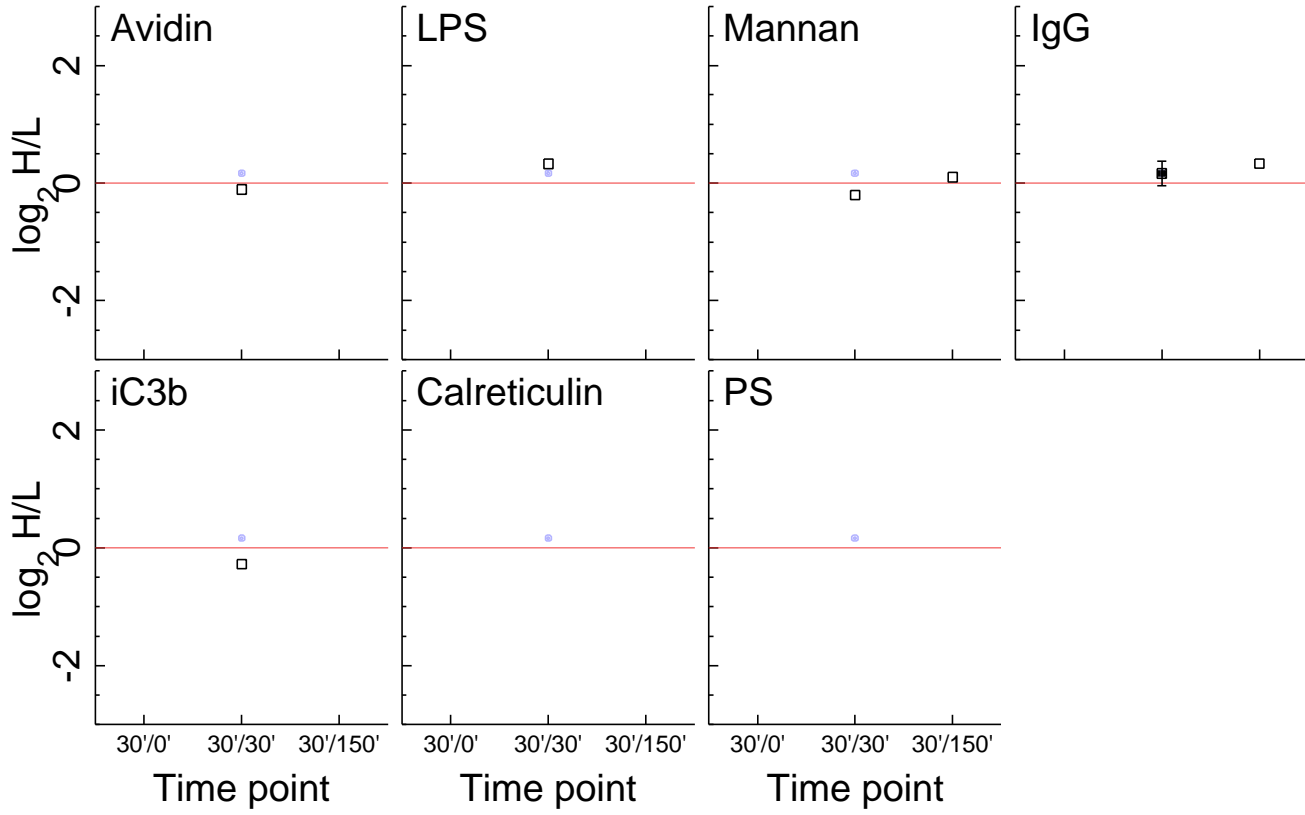

degs1 (O09005)

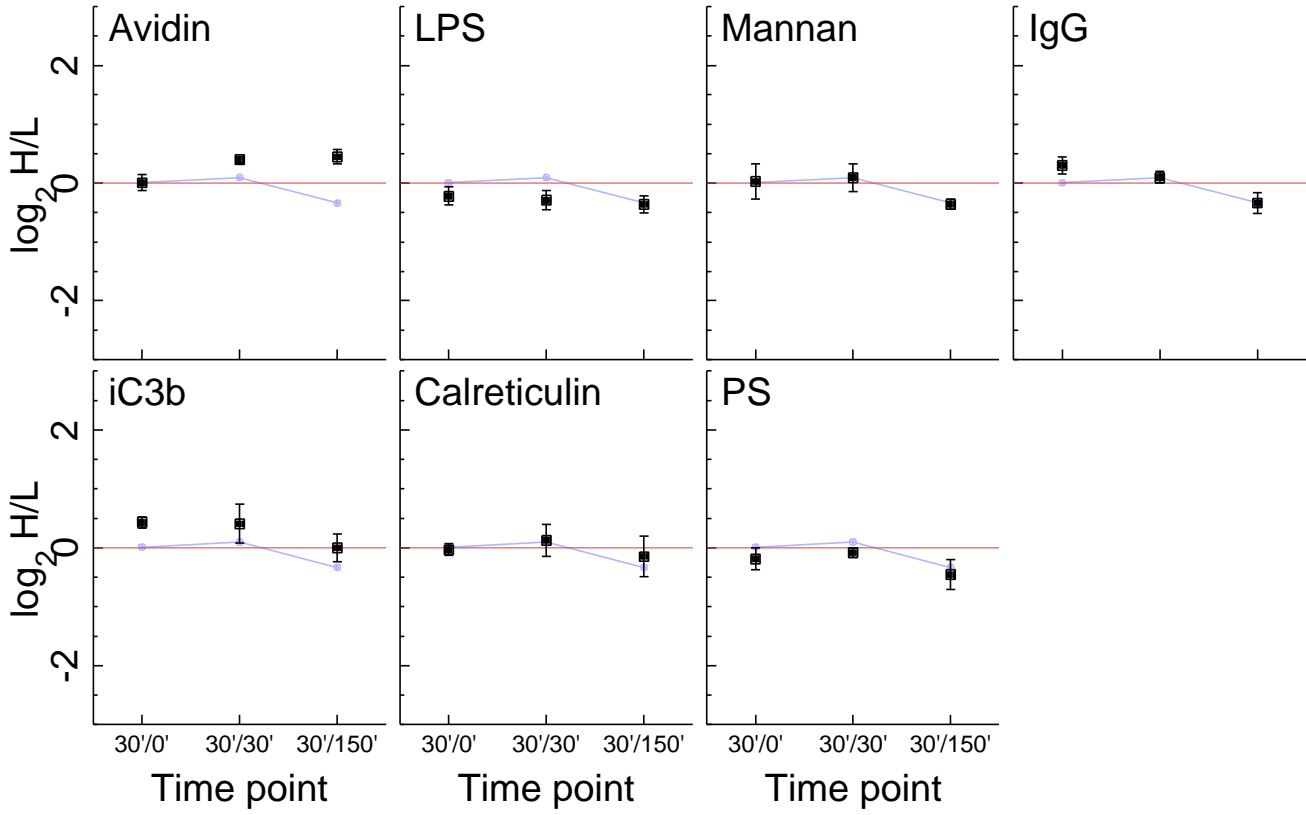

dek (Q7TNV0)

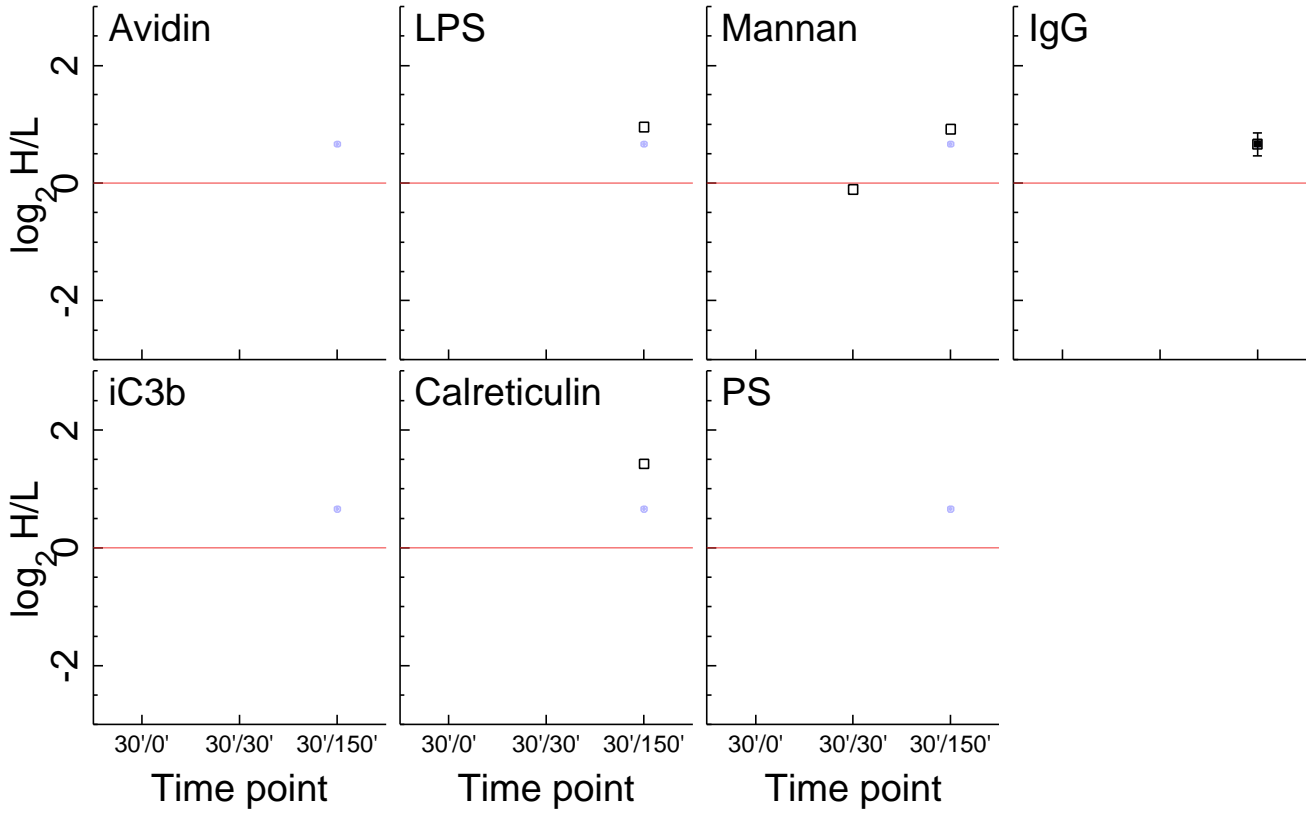

### dennd1a (Q8K382)

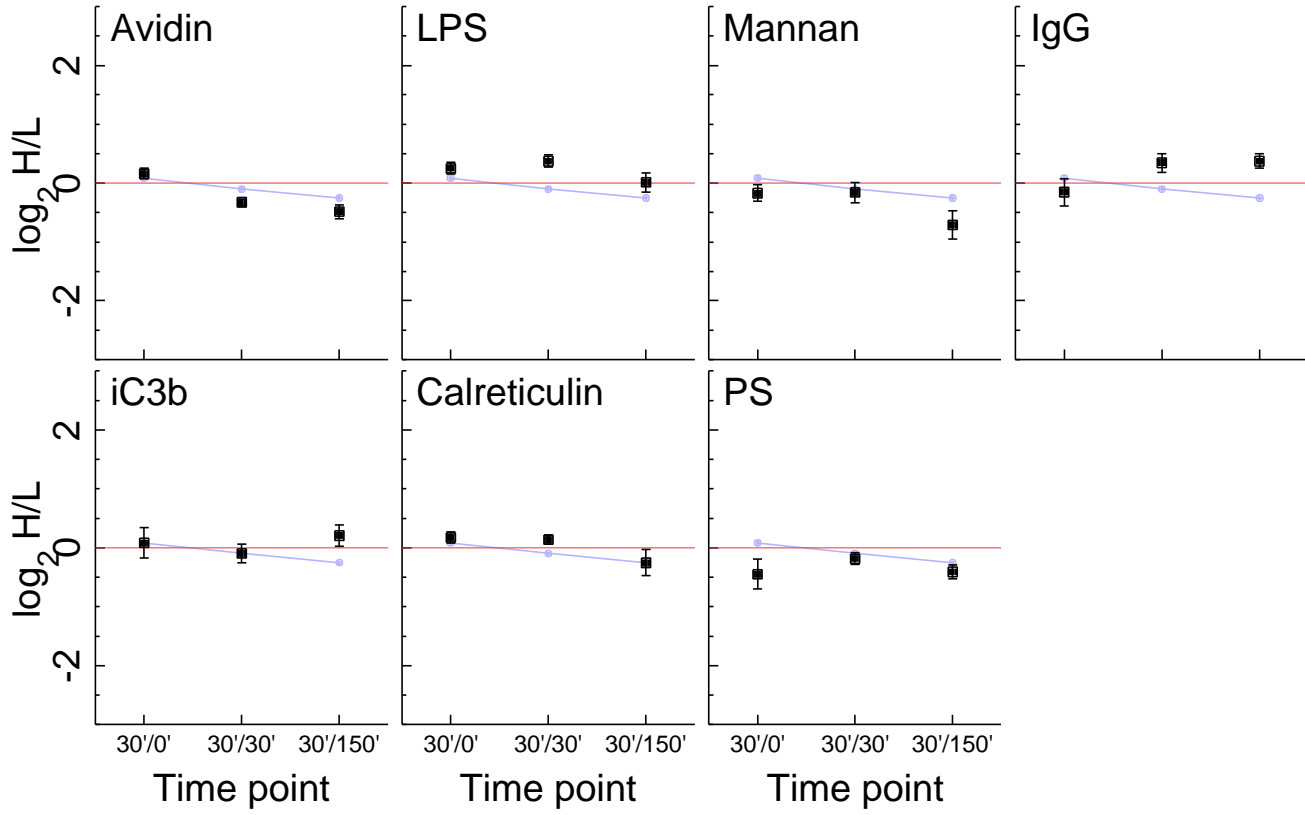



### dhrs1 (Q99L04)

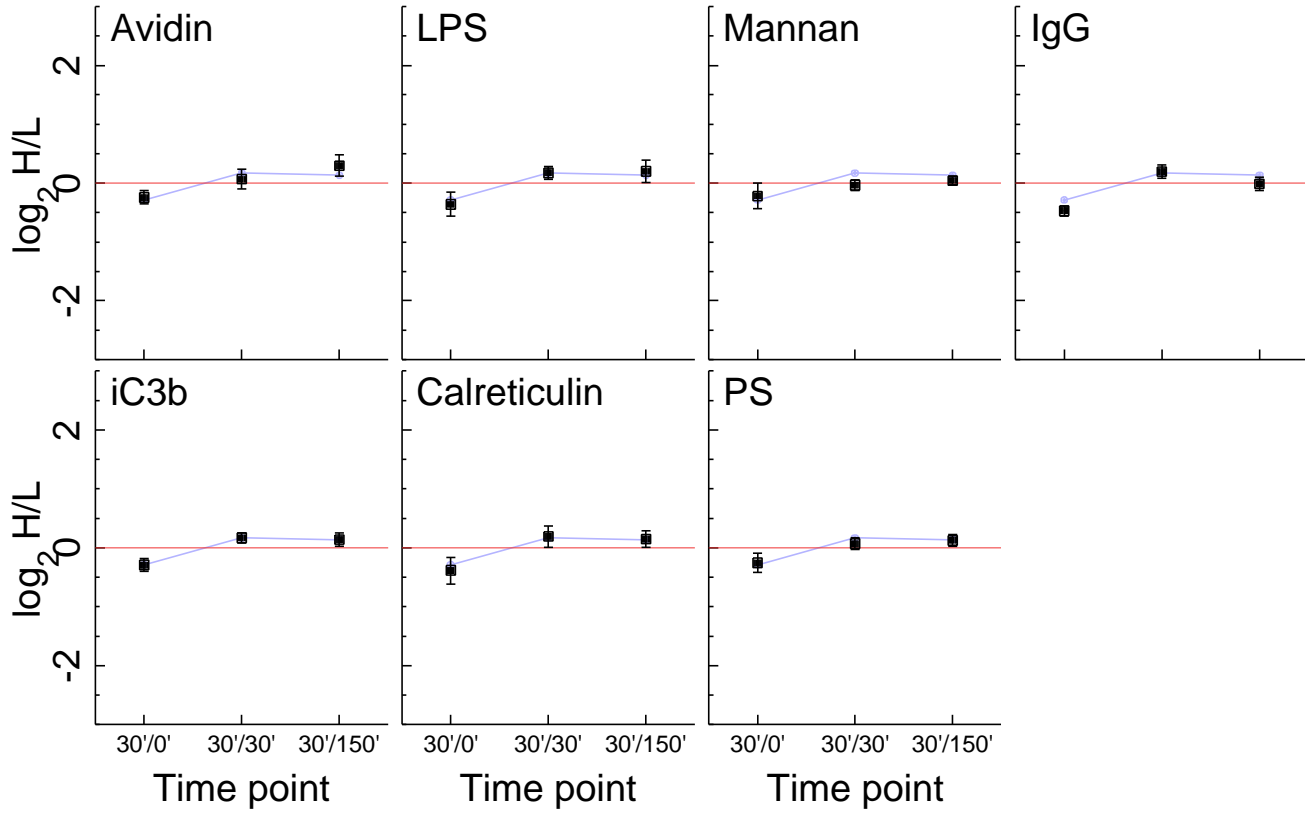

dhrrs4 (Q99LB2)

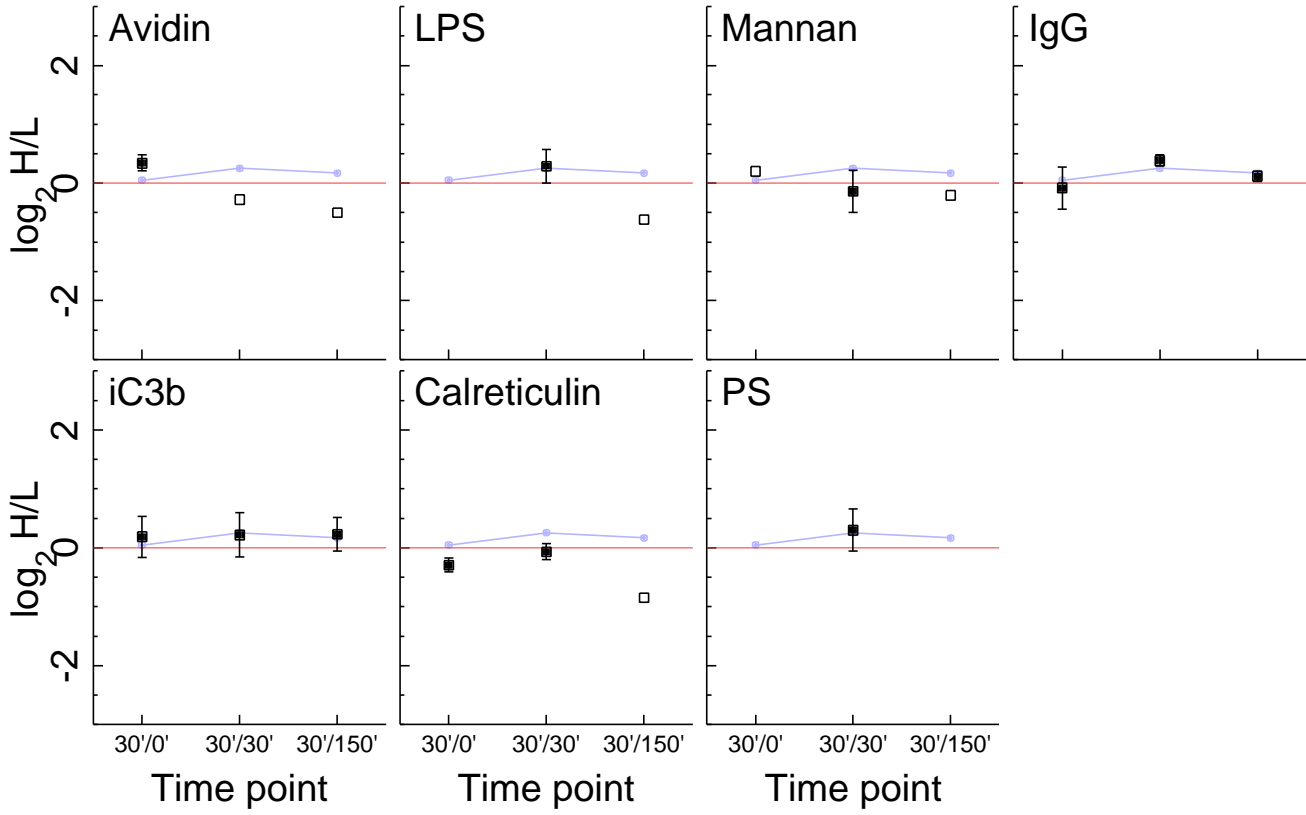

dhrs7 (Q9CXR1)

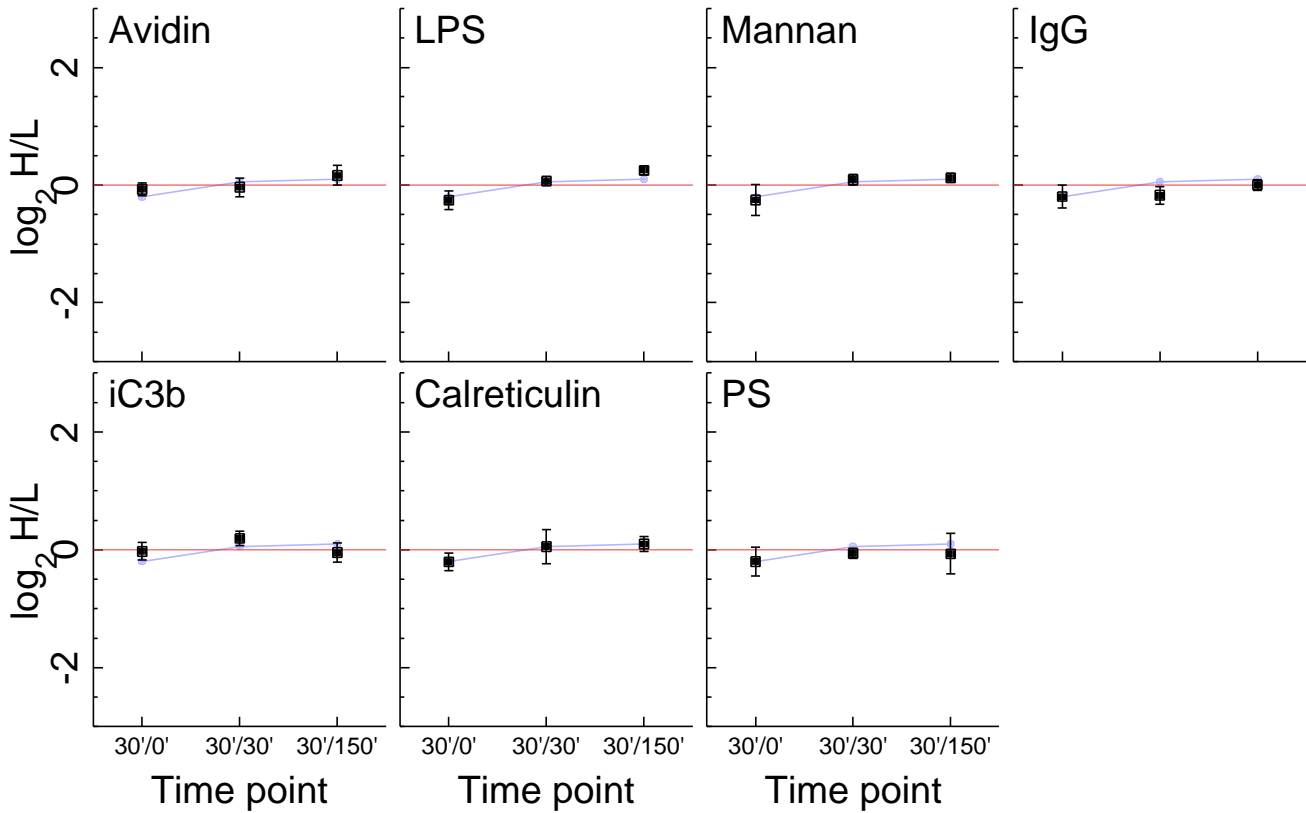

dhx15 (O35286)

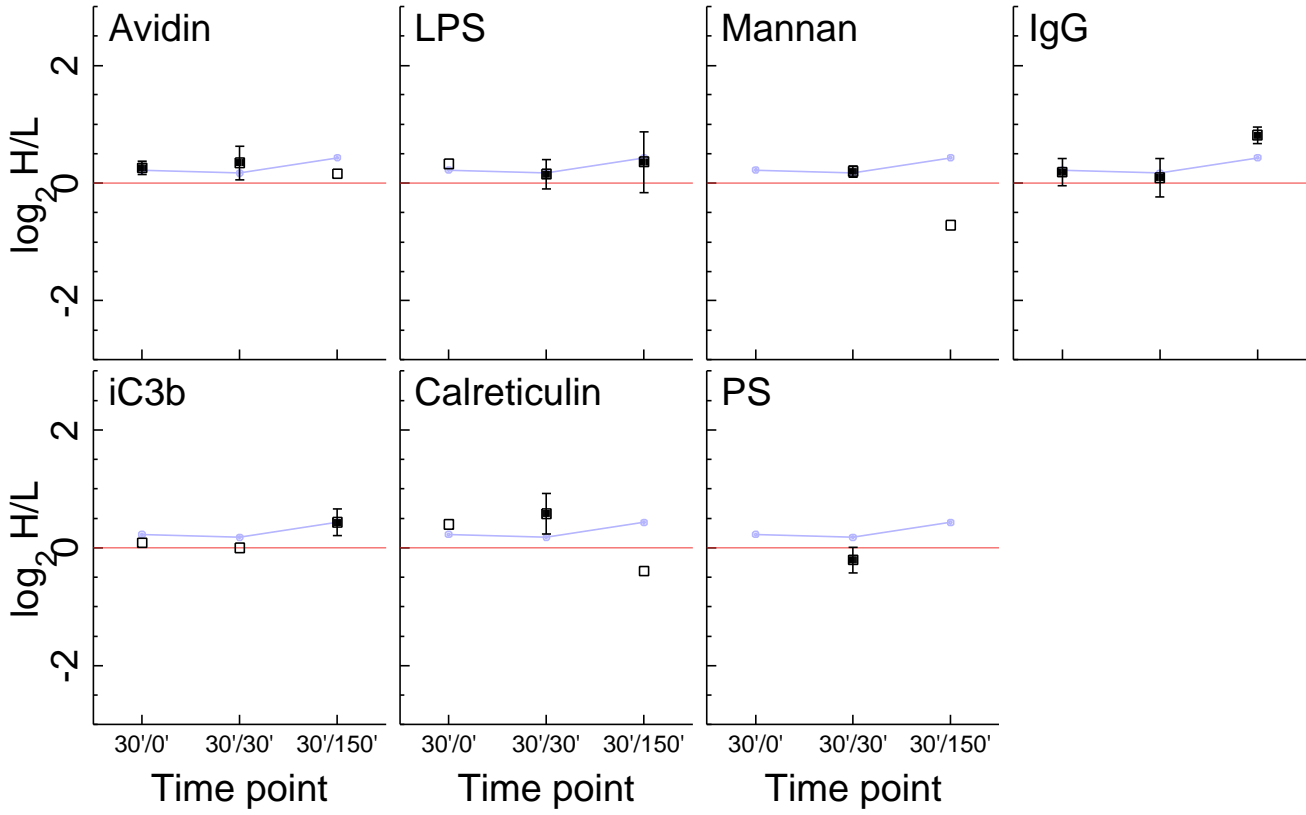

### dhx9 (E9QNN1)

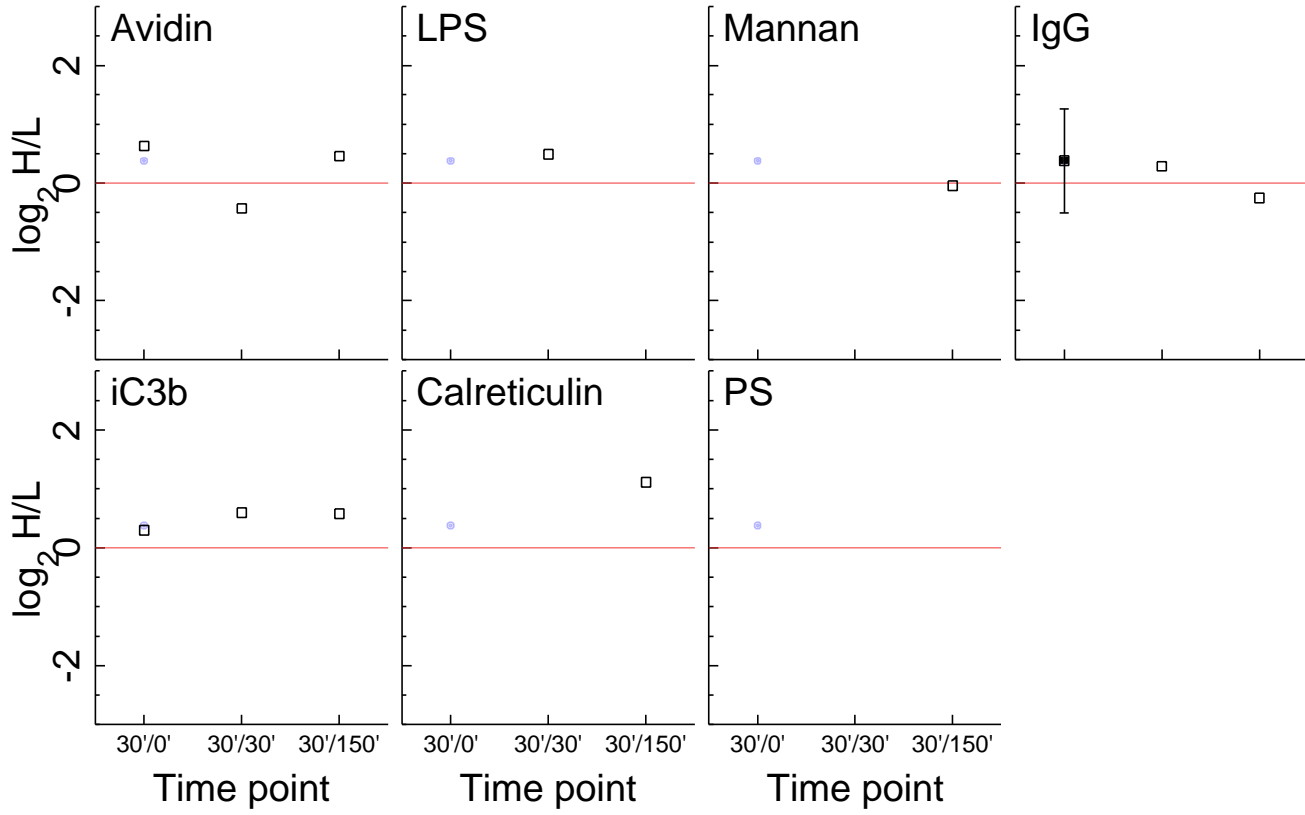

### diap1 (E9PV41)

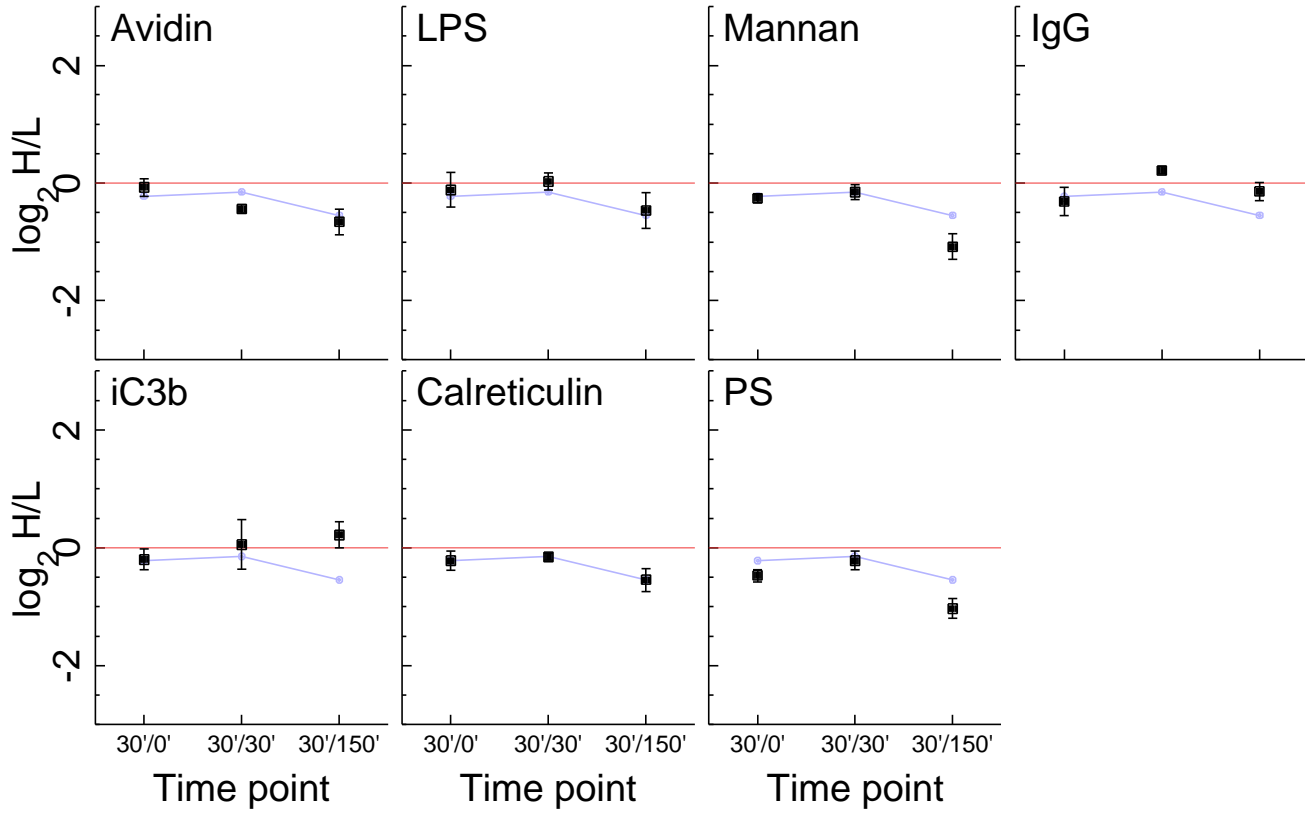

diap2 (E9Q4U7)

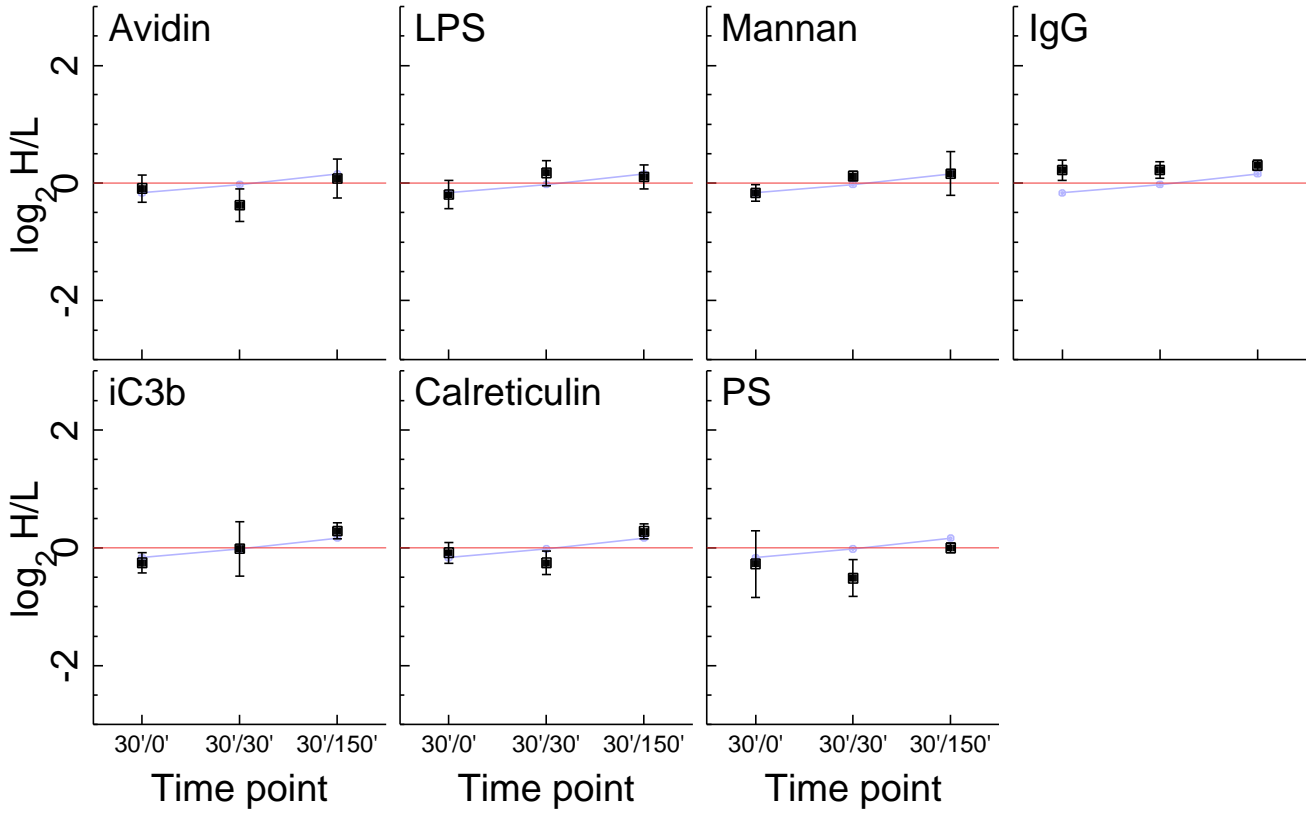

dirc2 (Q8BFQ6)

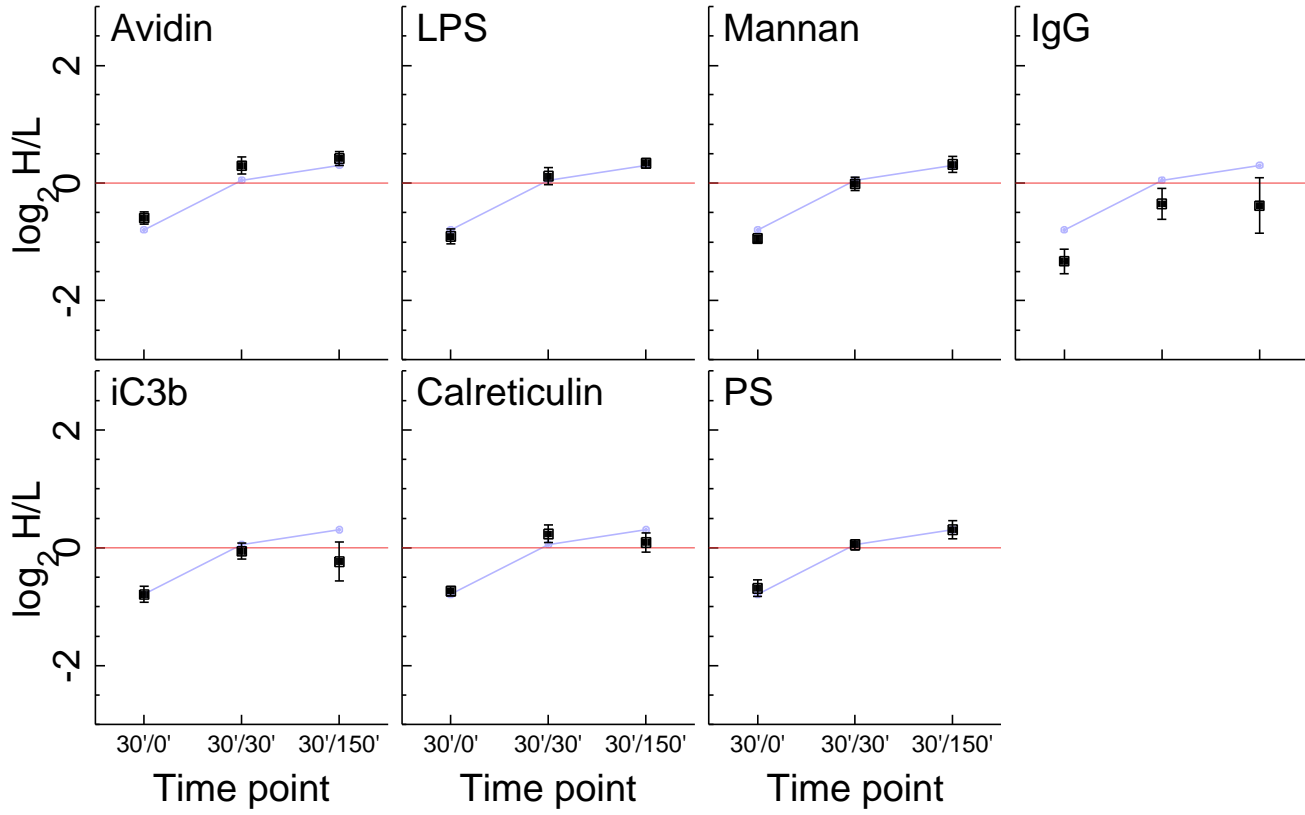



### dlat (Q8BMF4)

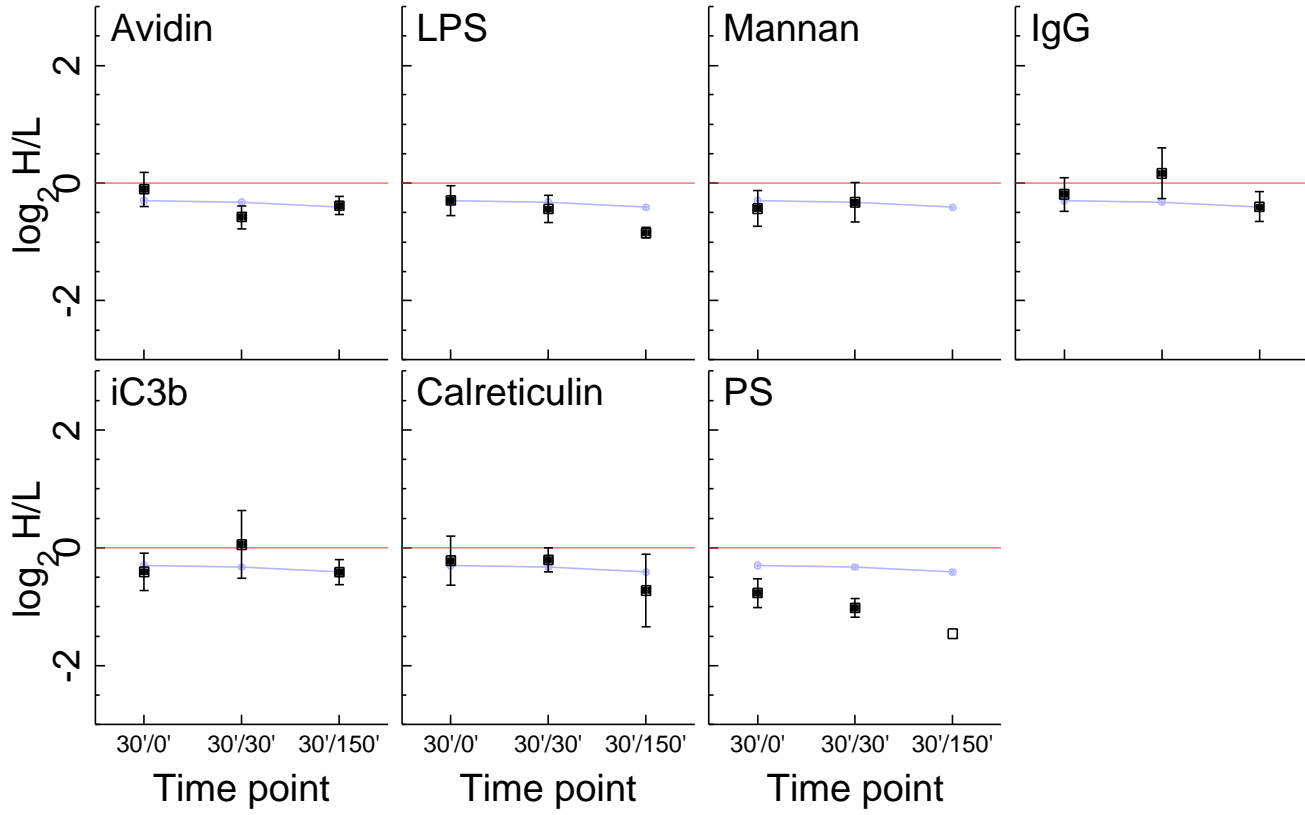

dId (O08749)

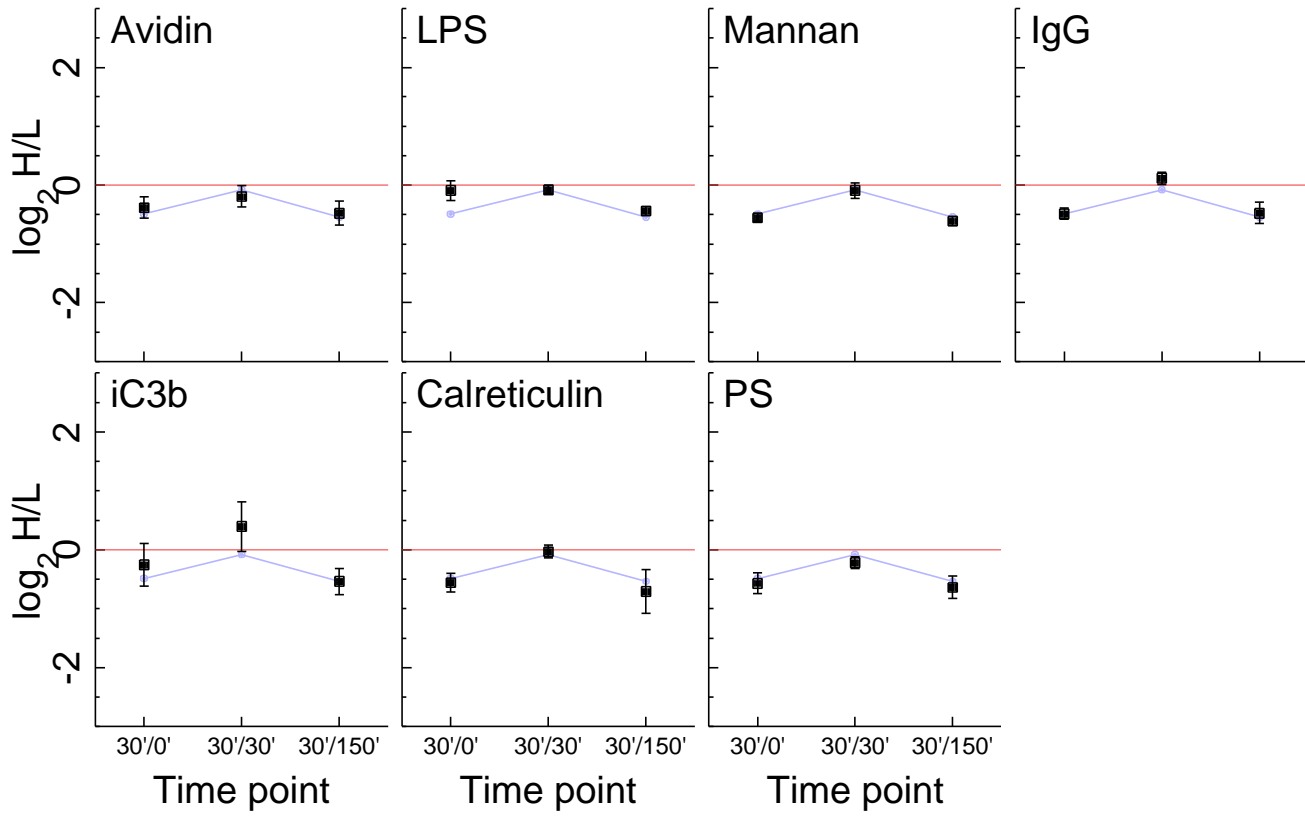

dIst (Q9D2G2)

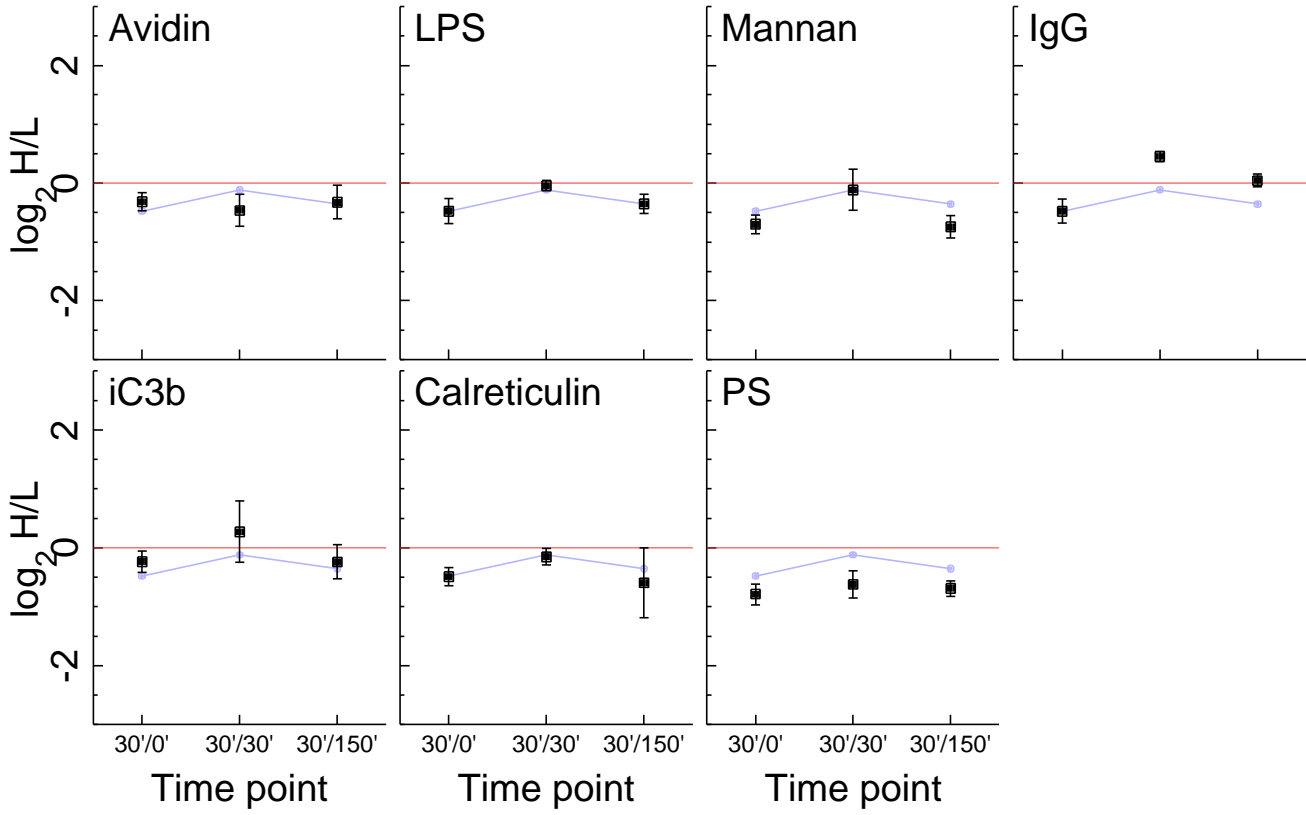

dmx11 (Q6PNC0)

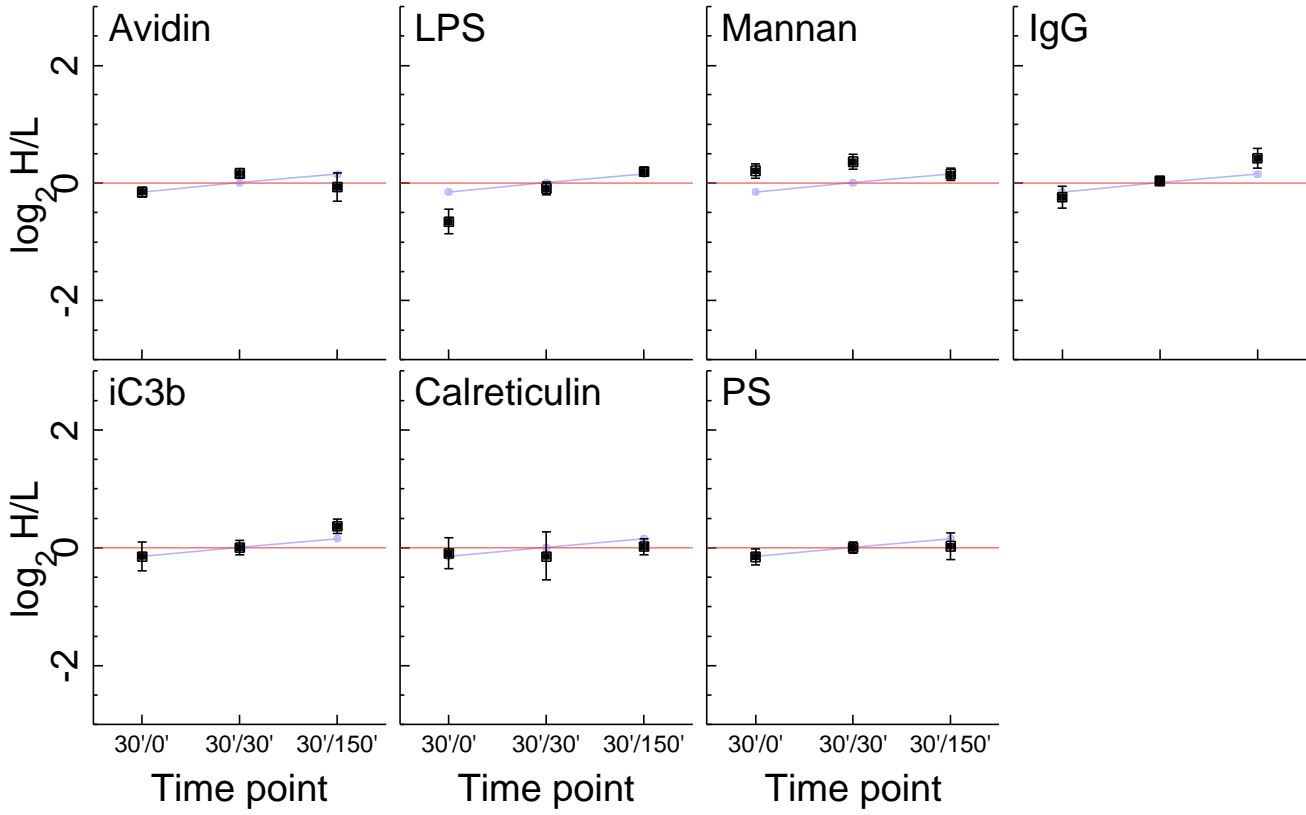

### dnaja1 (P63037)

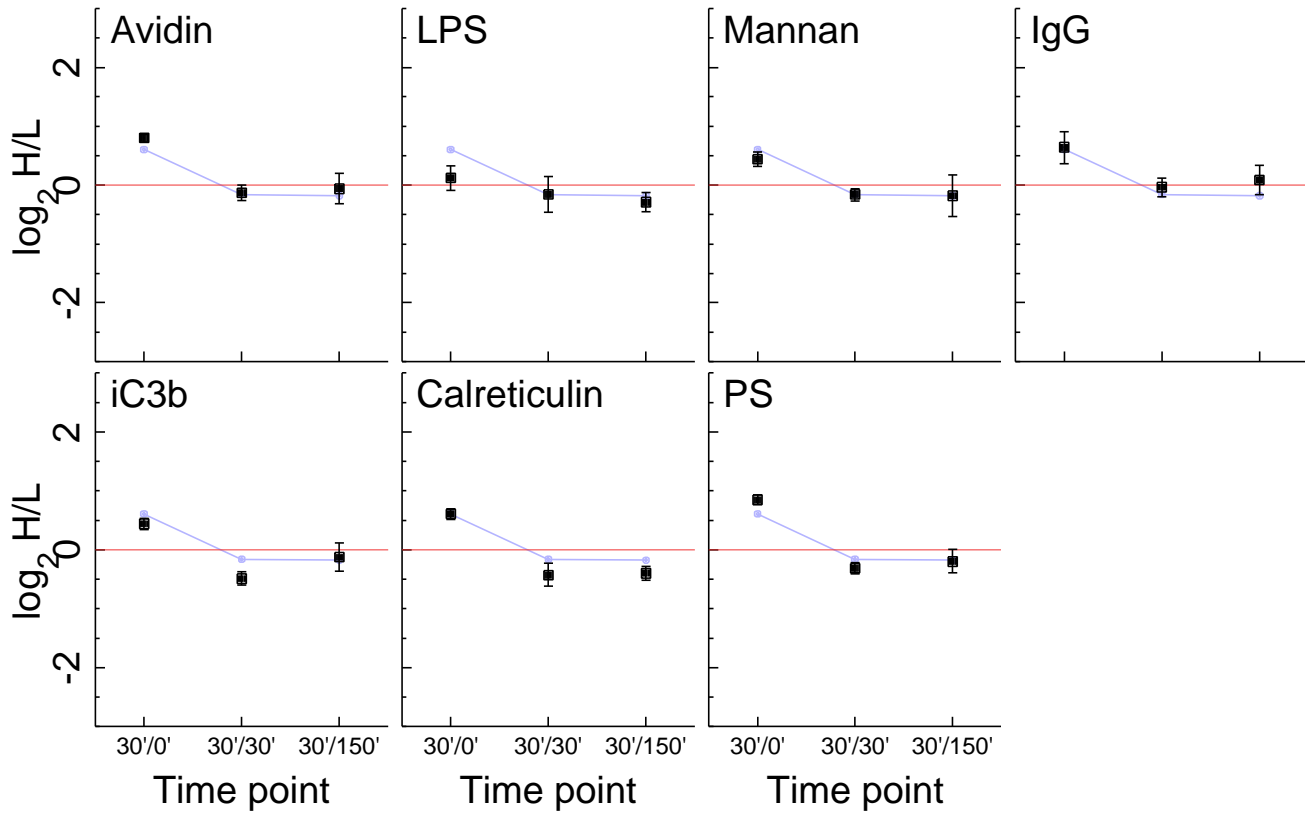

### dnaja2 (Q9QYJ0)

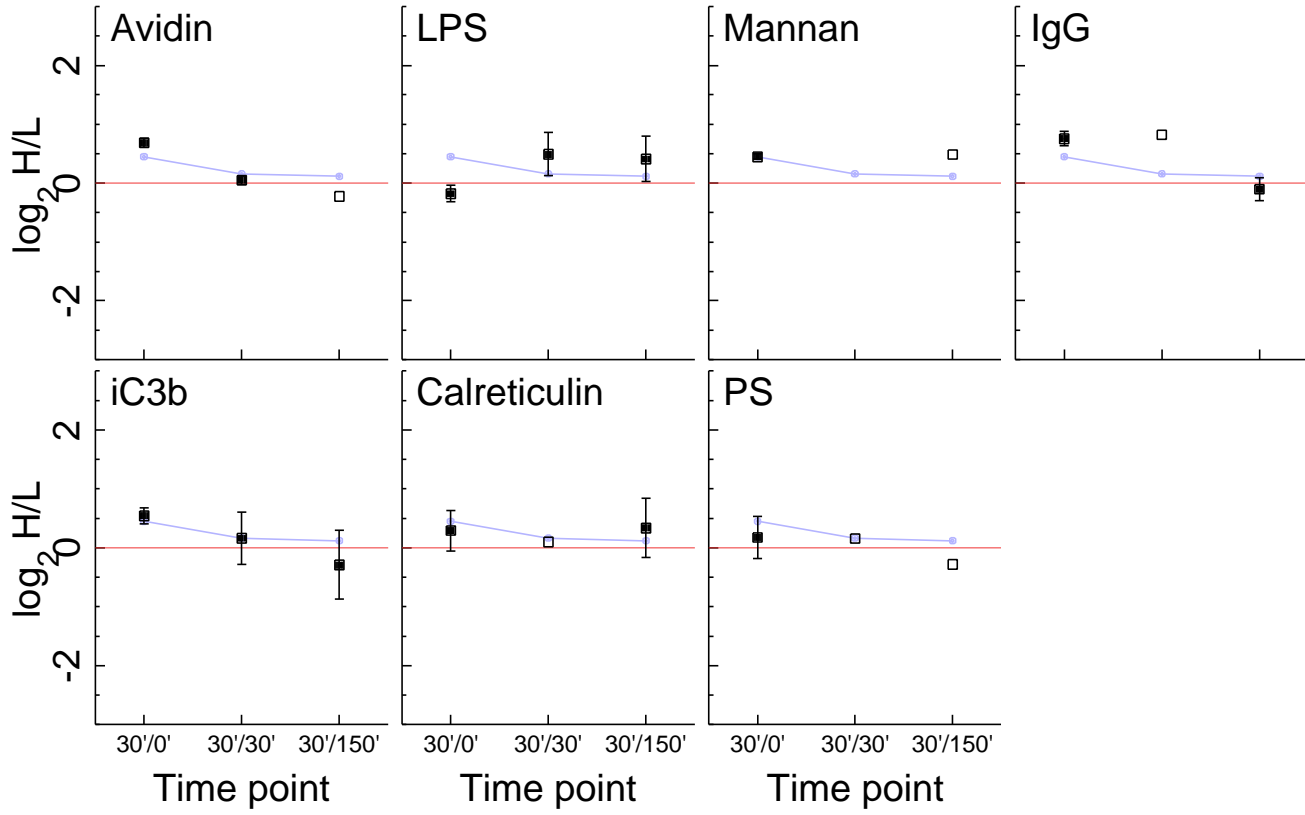

dnajb11 (Q99KV1)

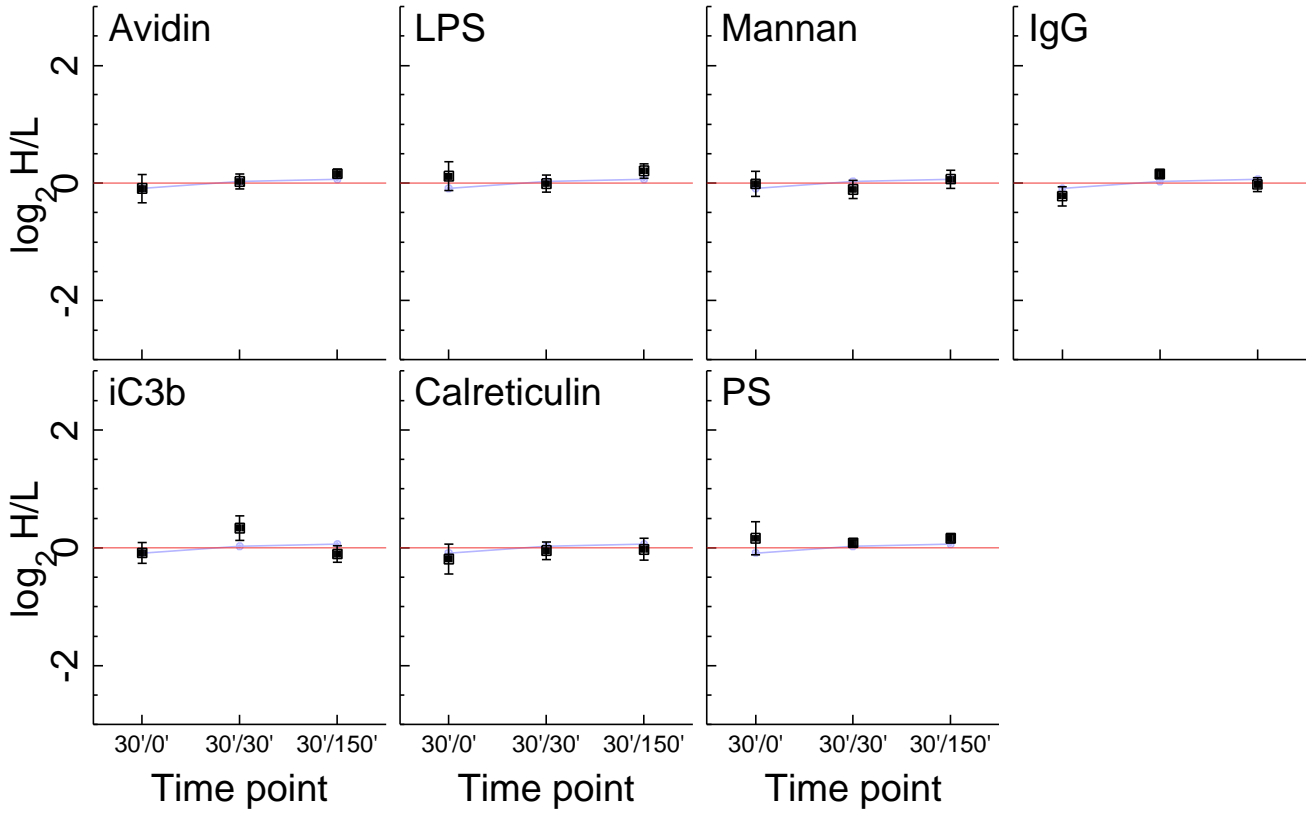

dnajb6 (O54946)

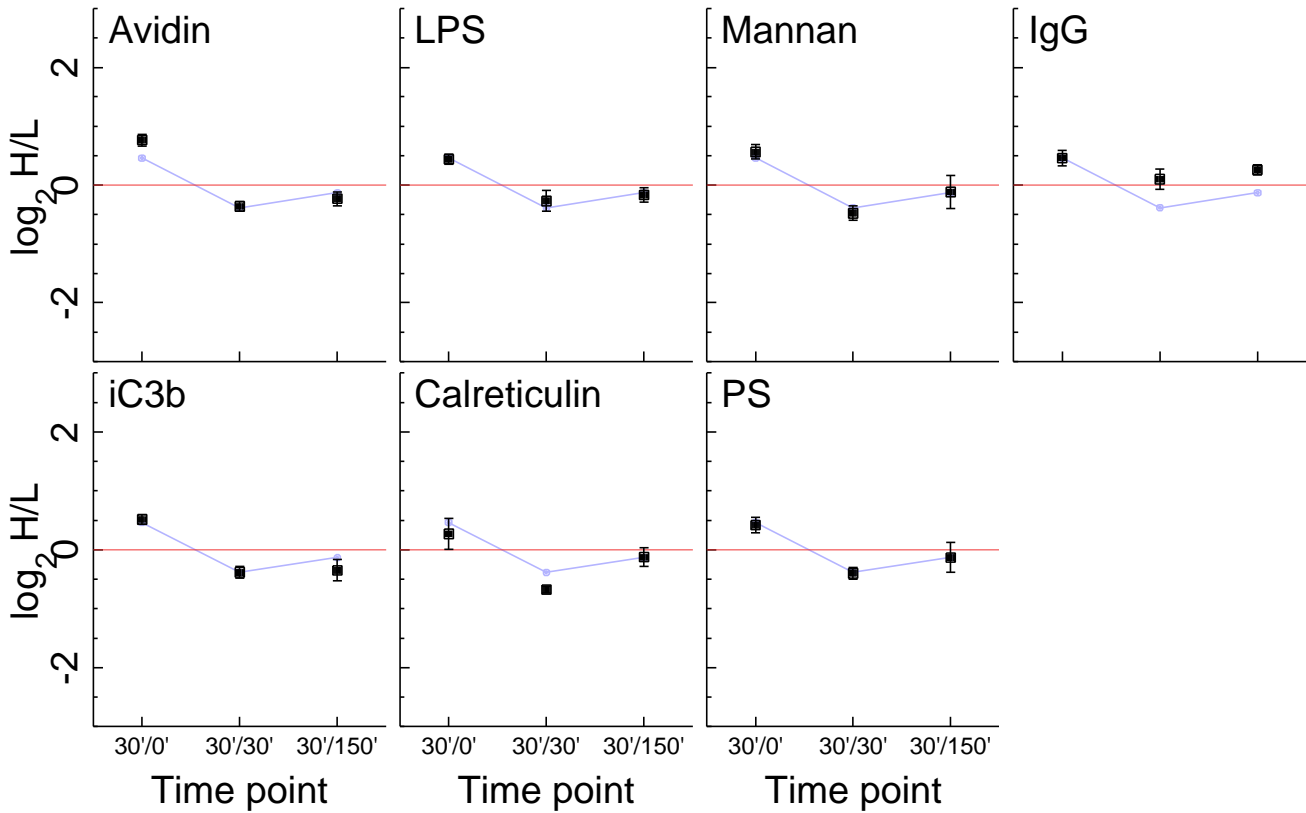



# dnajc13 (G3X922)

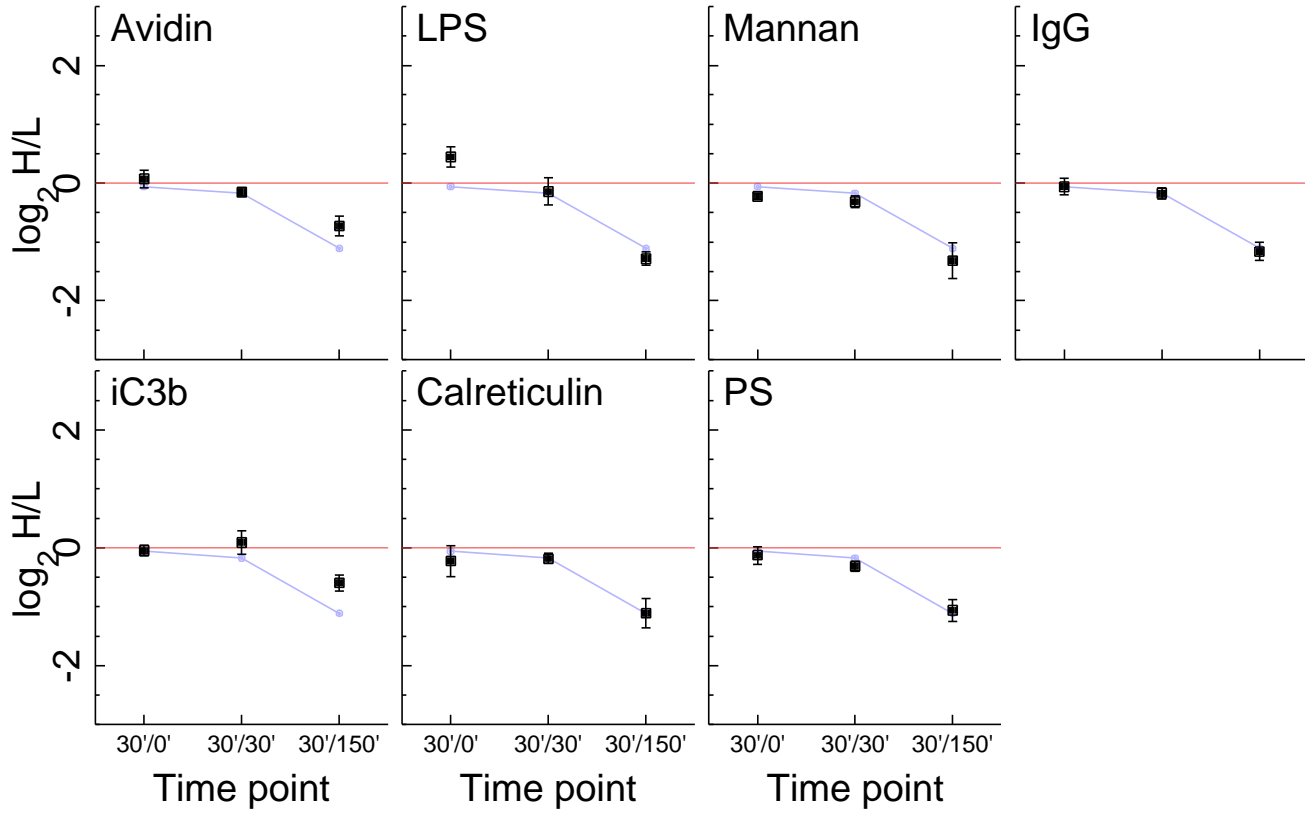

### dnajc3 (Q91YW3)

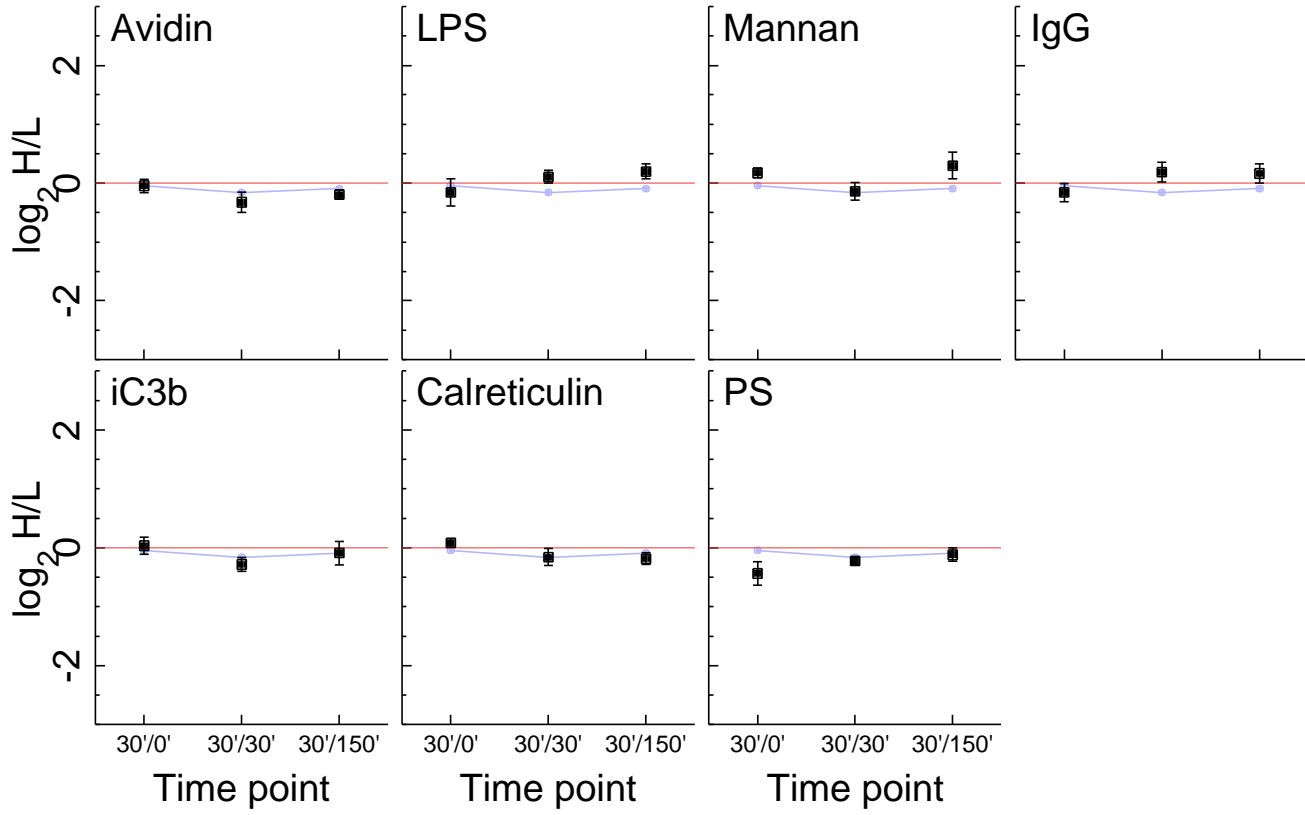

dnajc5 (P60904)

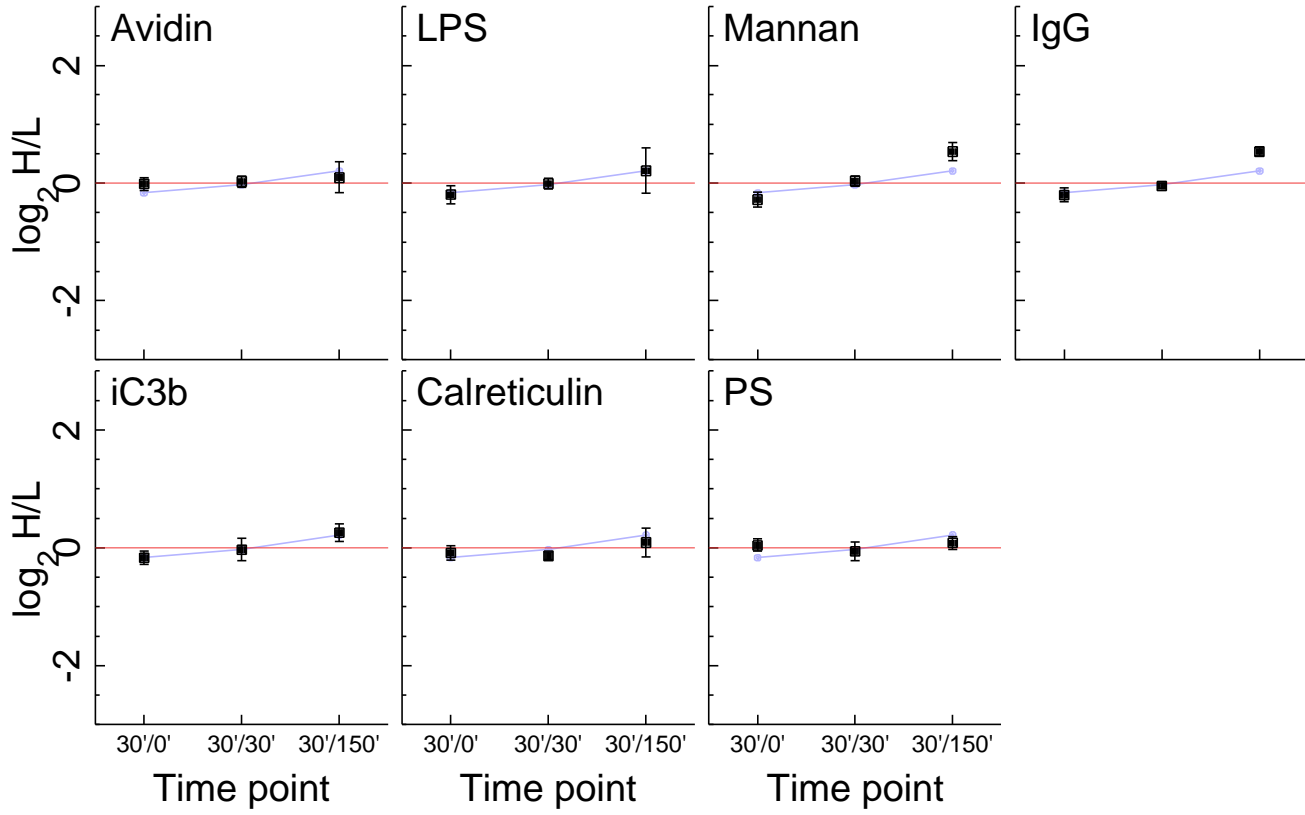

dnajc8 (Q6NZN0)

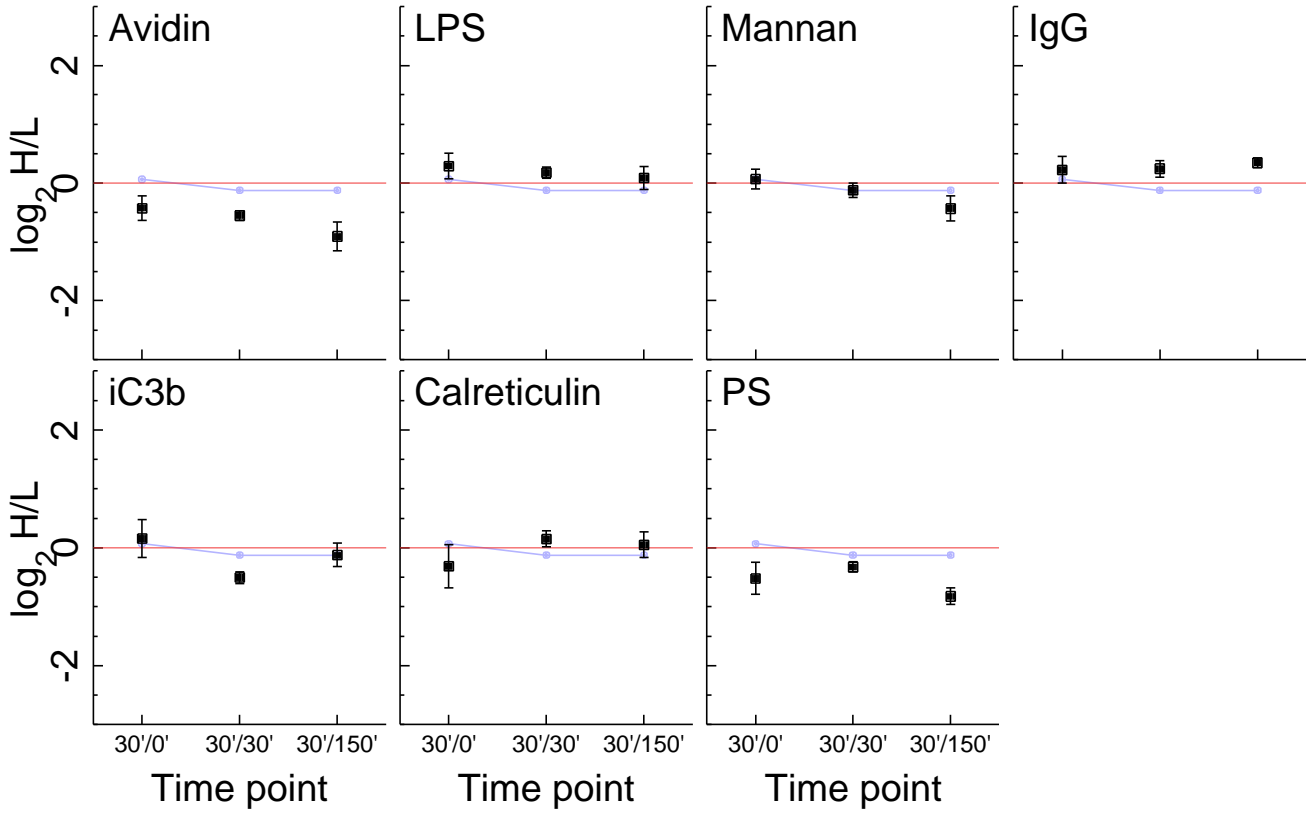

### dnajc9 (Q91WN1)

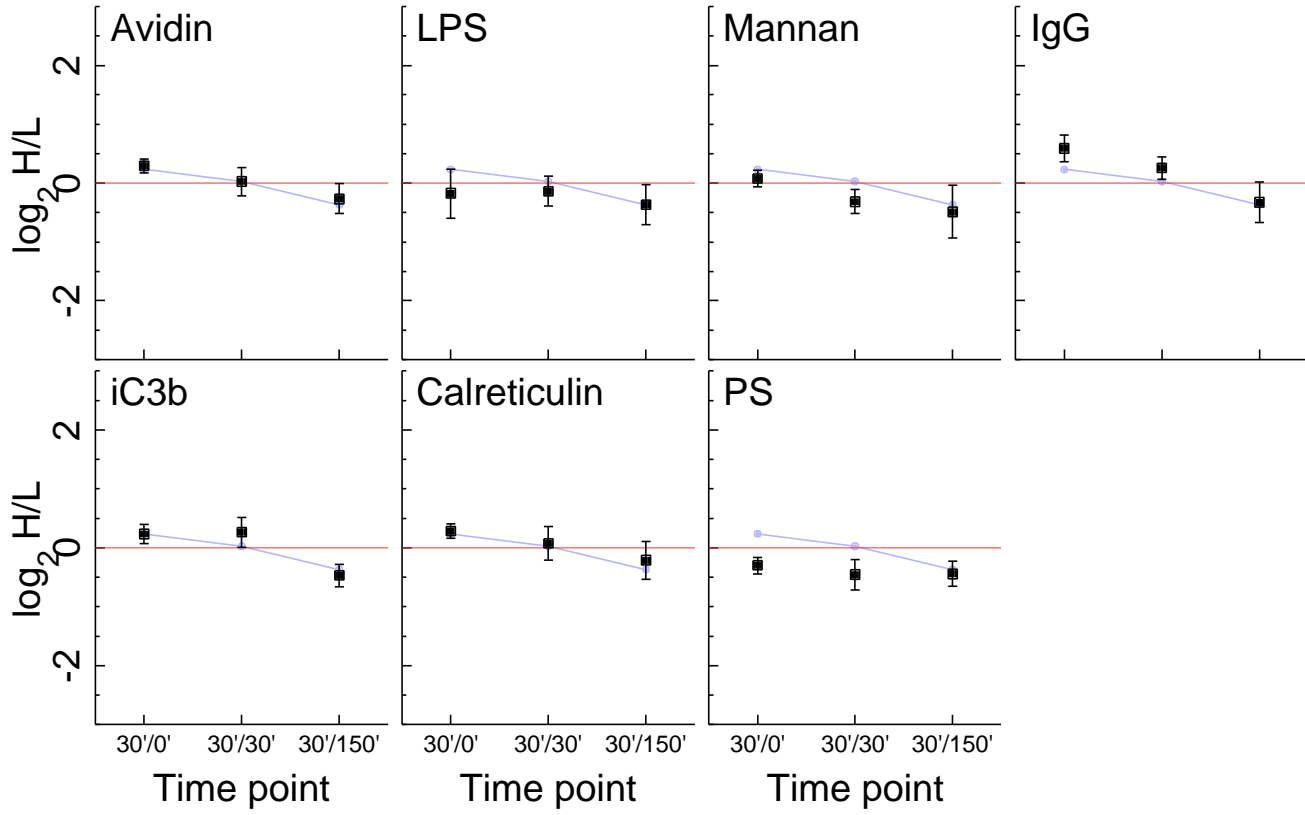

### dnase1l1 (Q9D7J6)

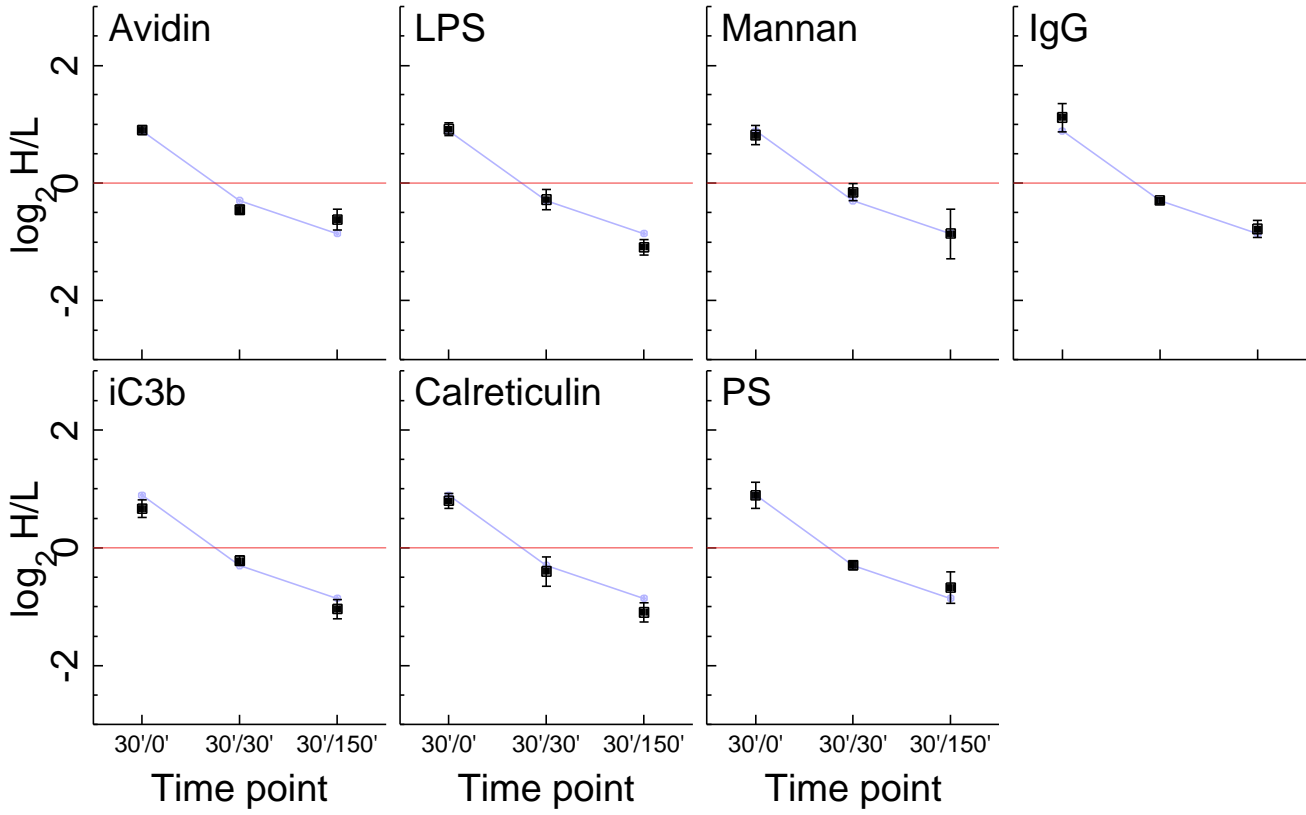

dnase2 (P56542)

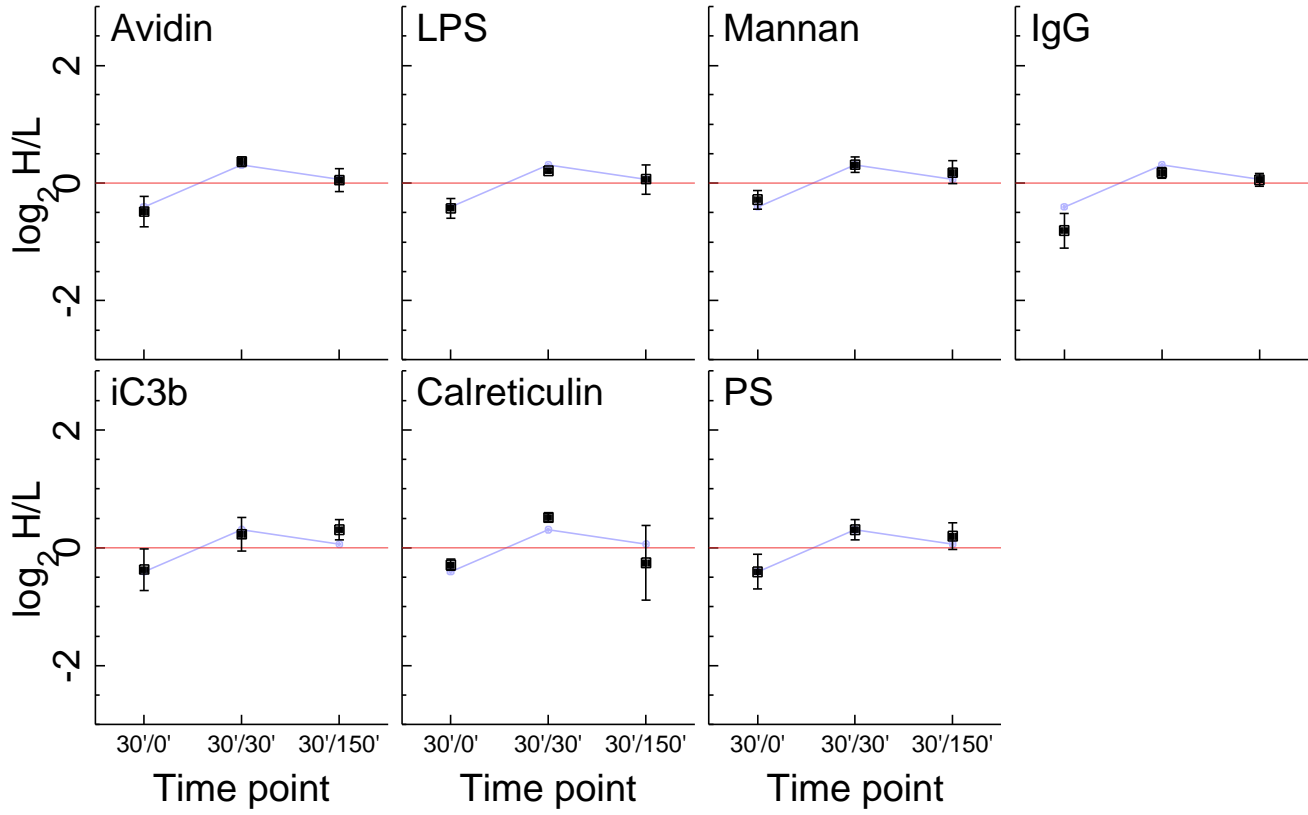

dnm2 (P39054)

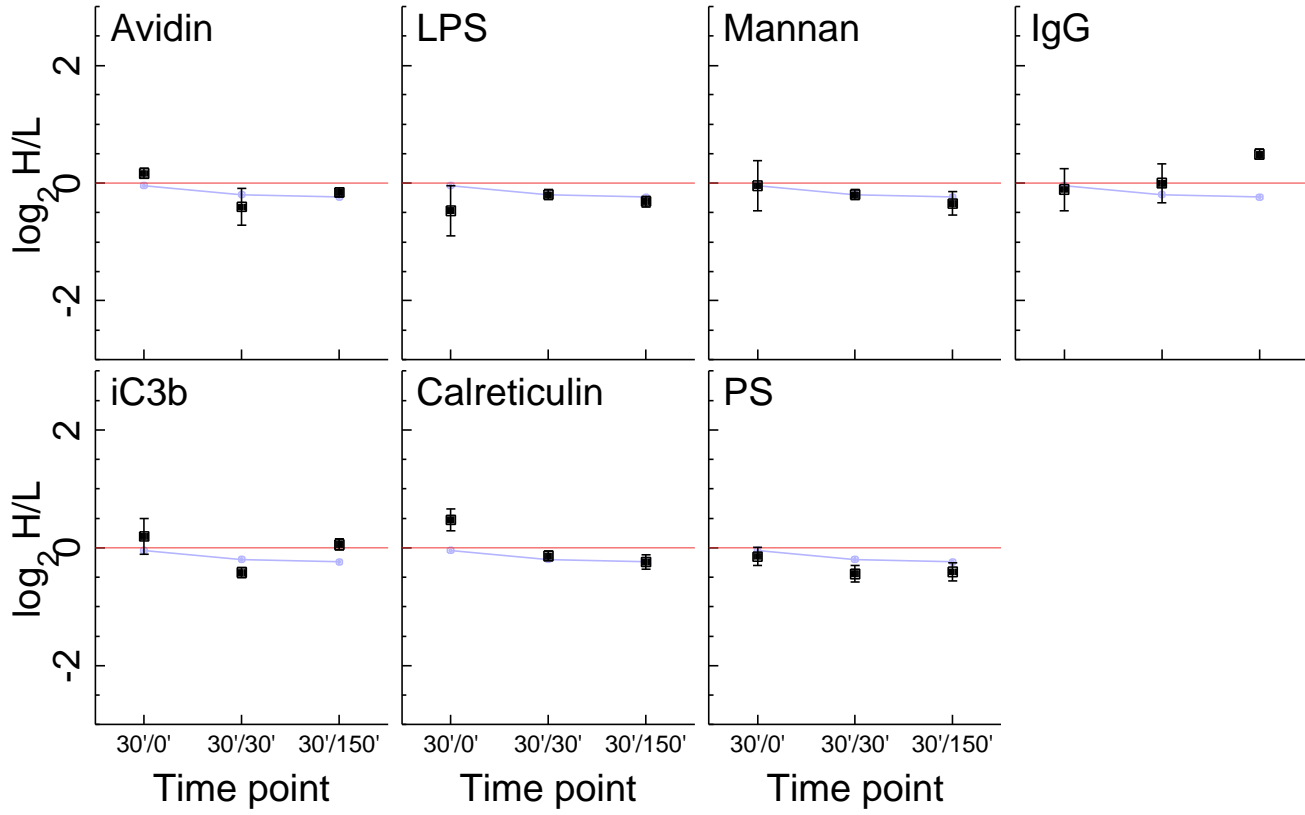



### dnm3 (E9QLL2)

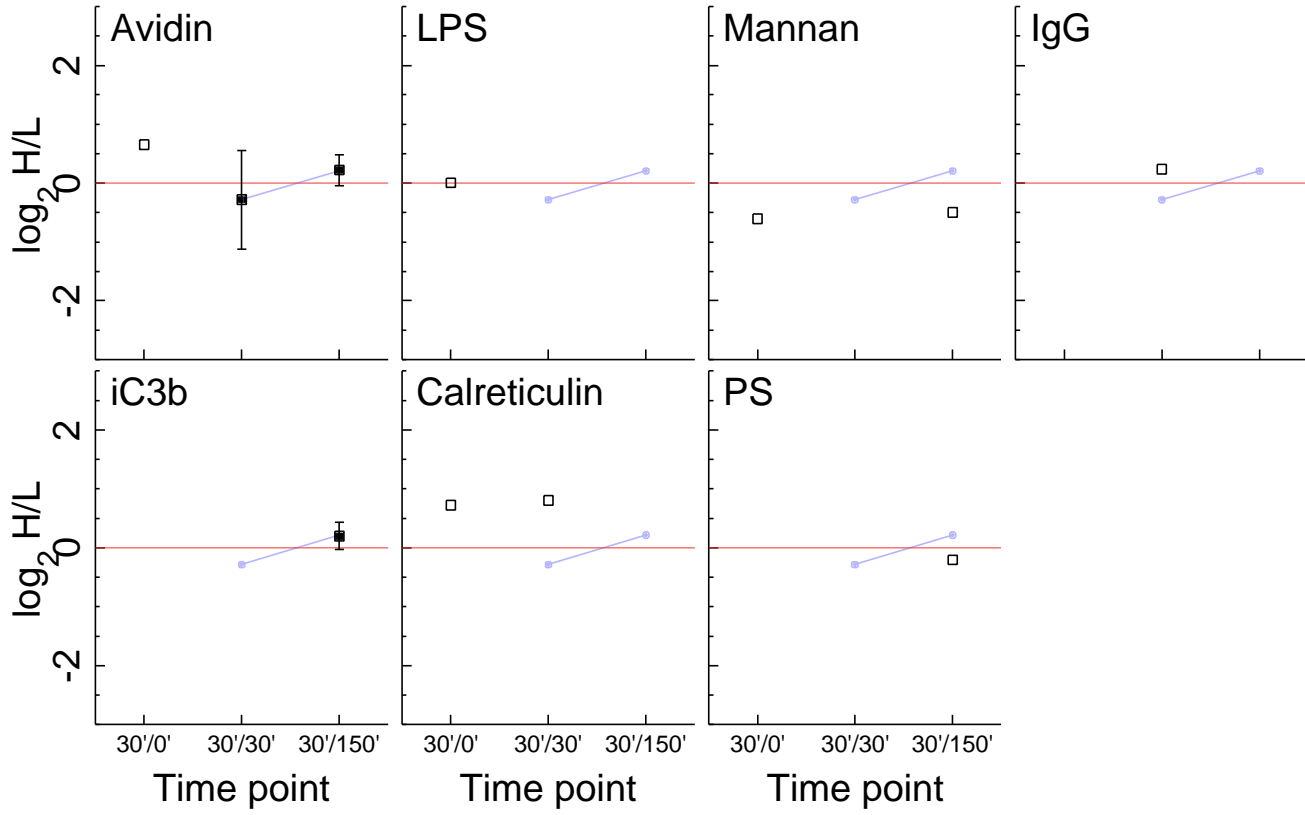

### dock2 (Q8C3J5)

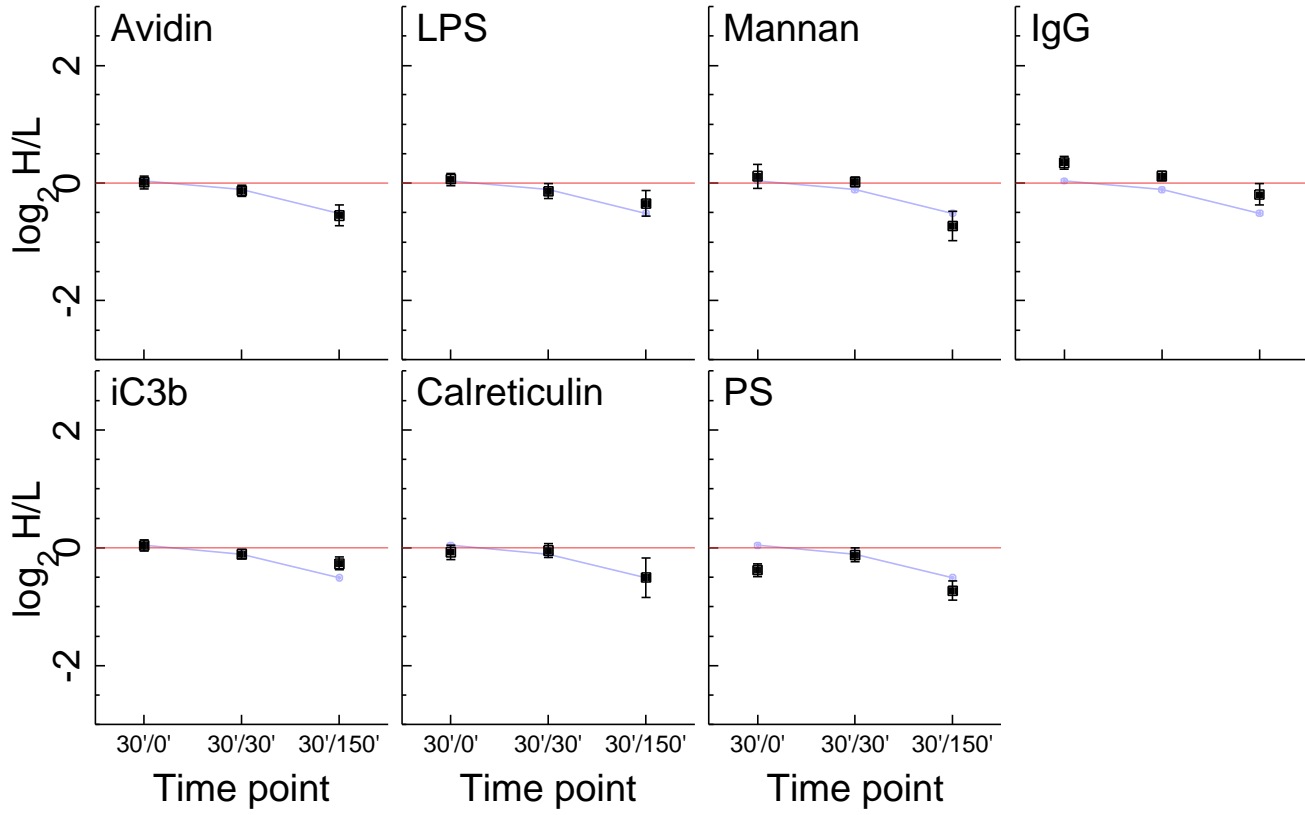

### dock8 (Q8C147)

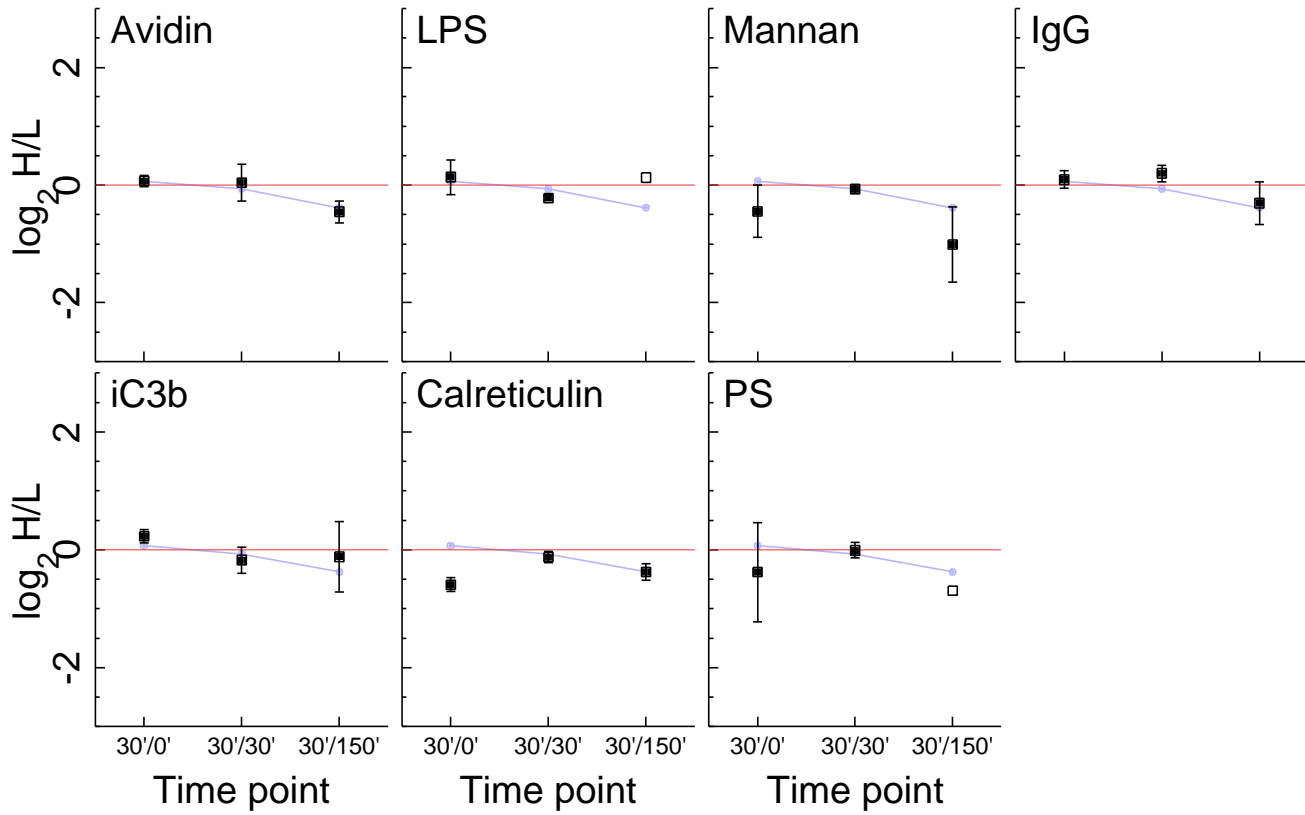

### dok1 (P97465)

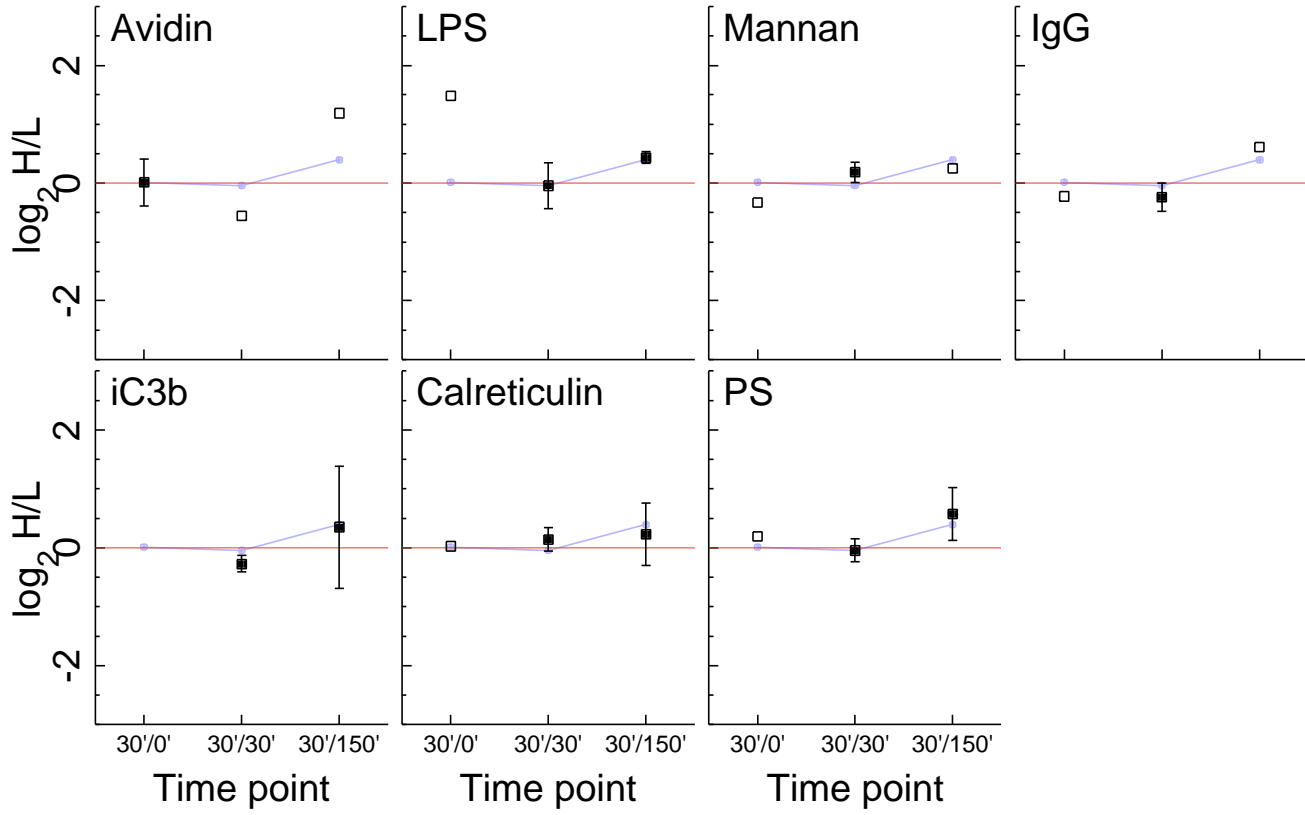

dok2 (O70469)

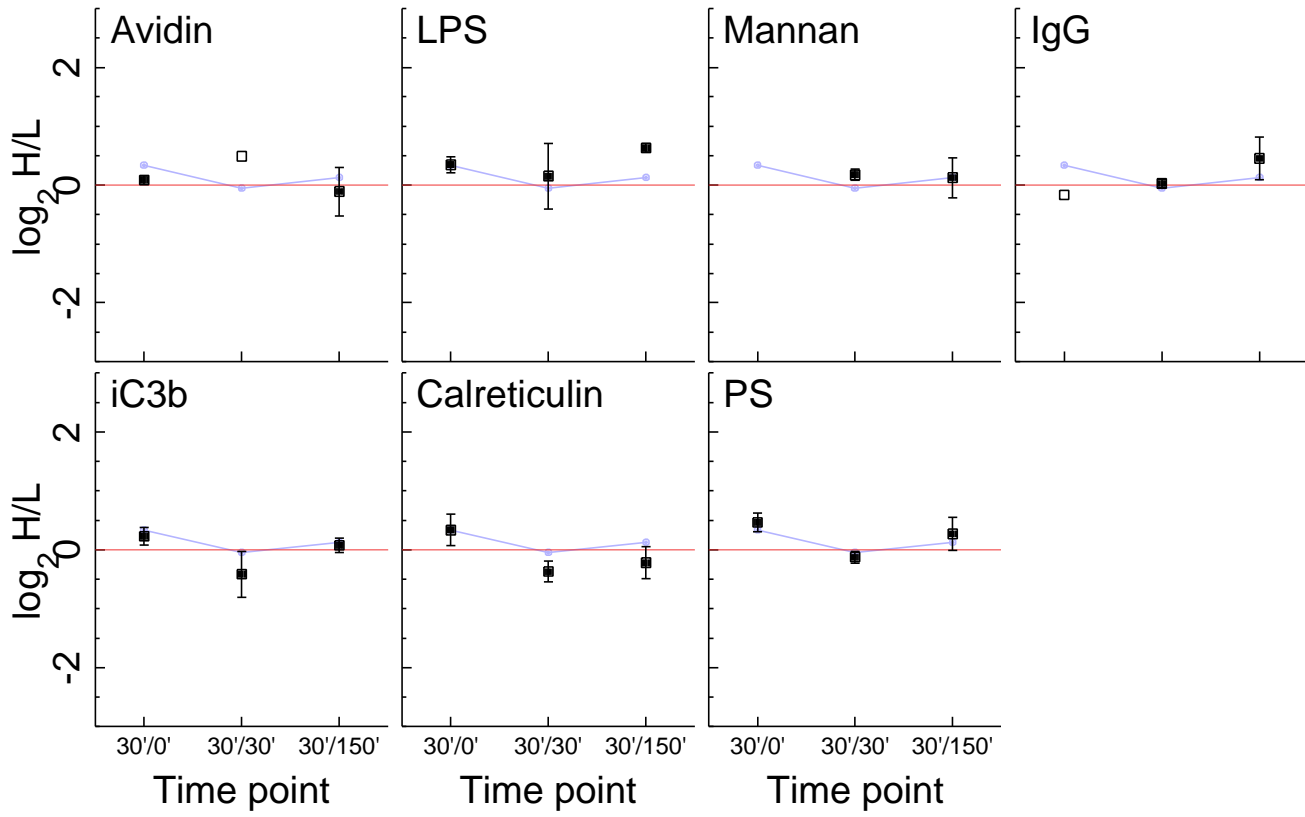

dok3 (Q9QZK7)

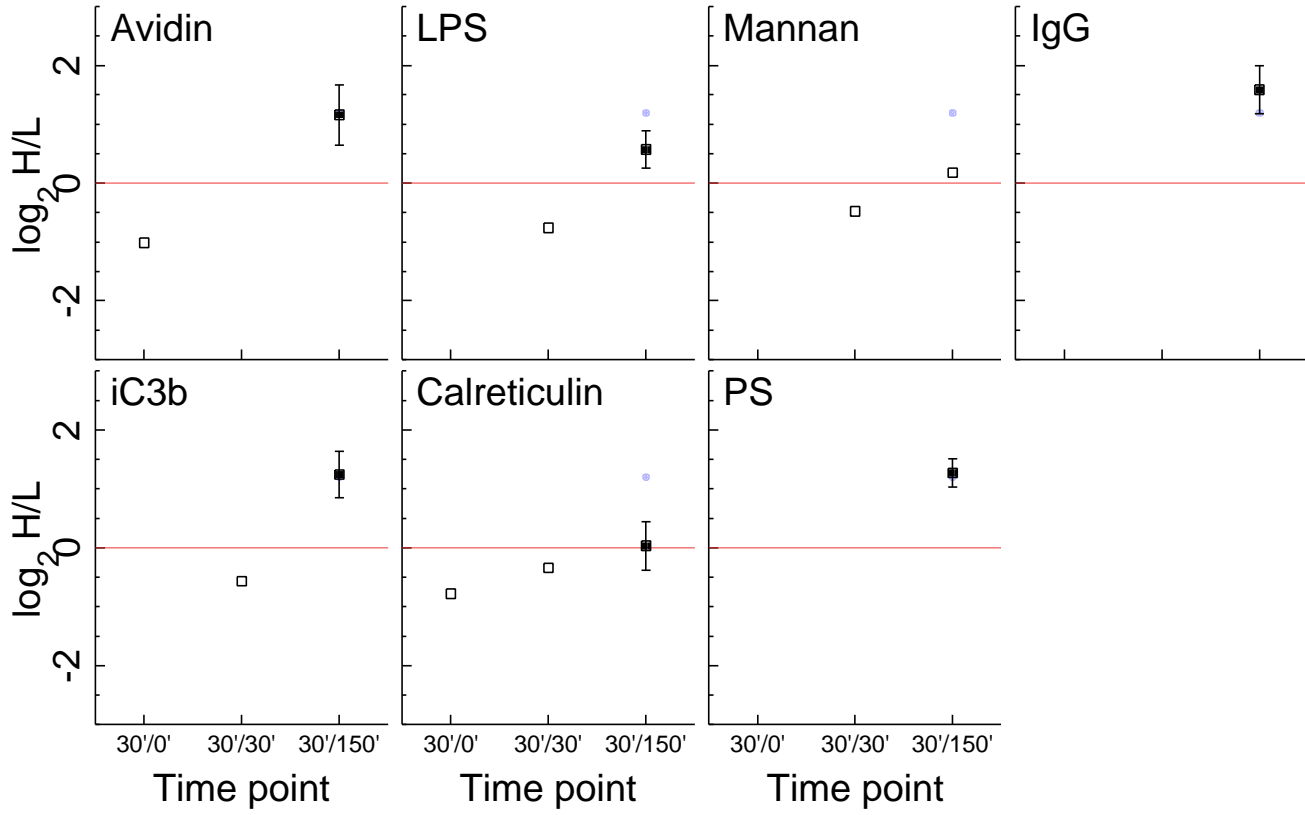

dpep2 (Q8C255)

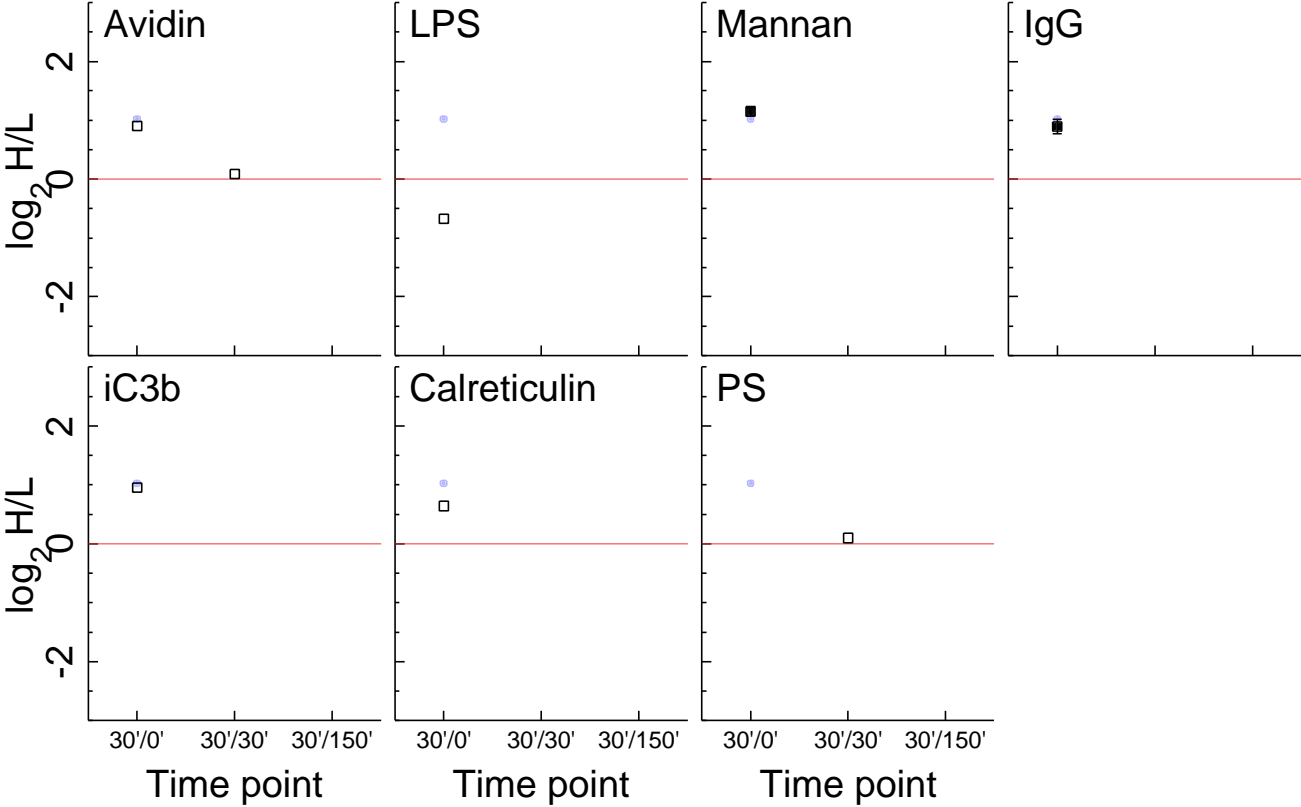

### dpm1 (O70152)

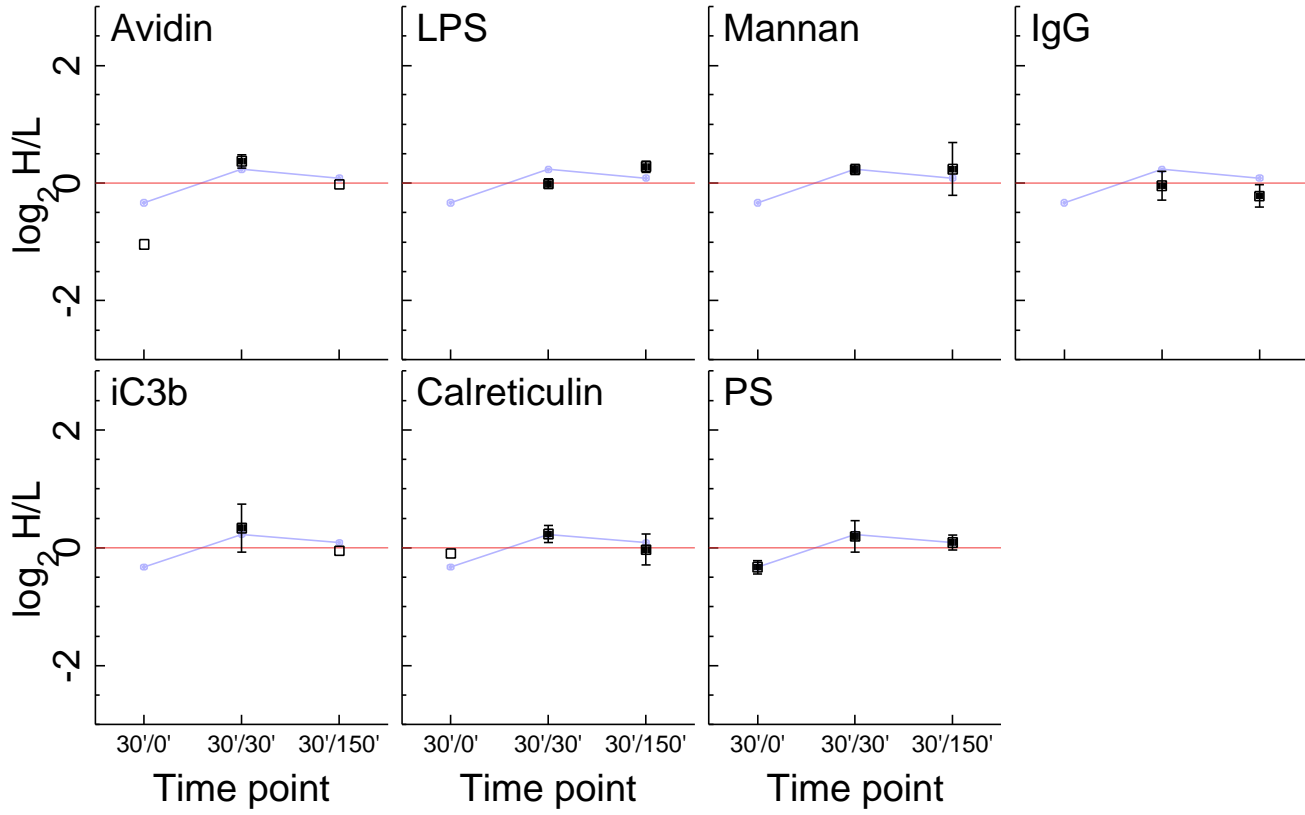



dpm3 (Q9D1Q4)

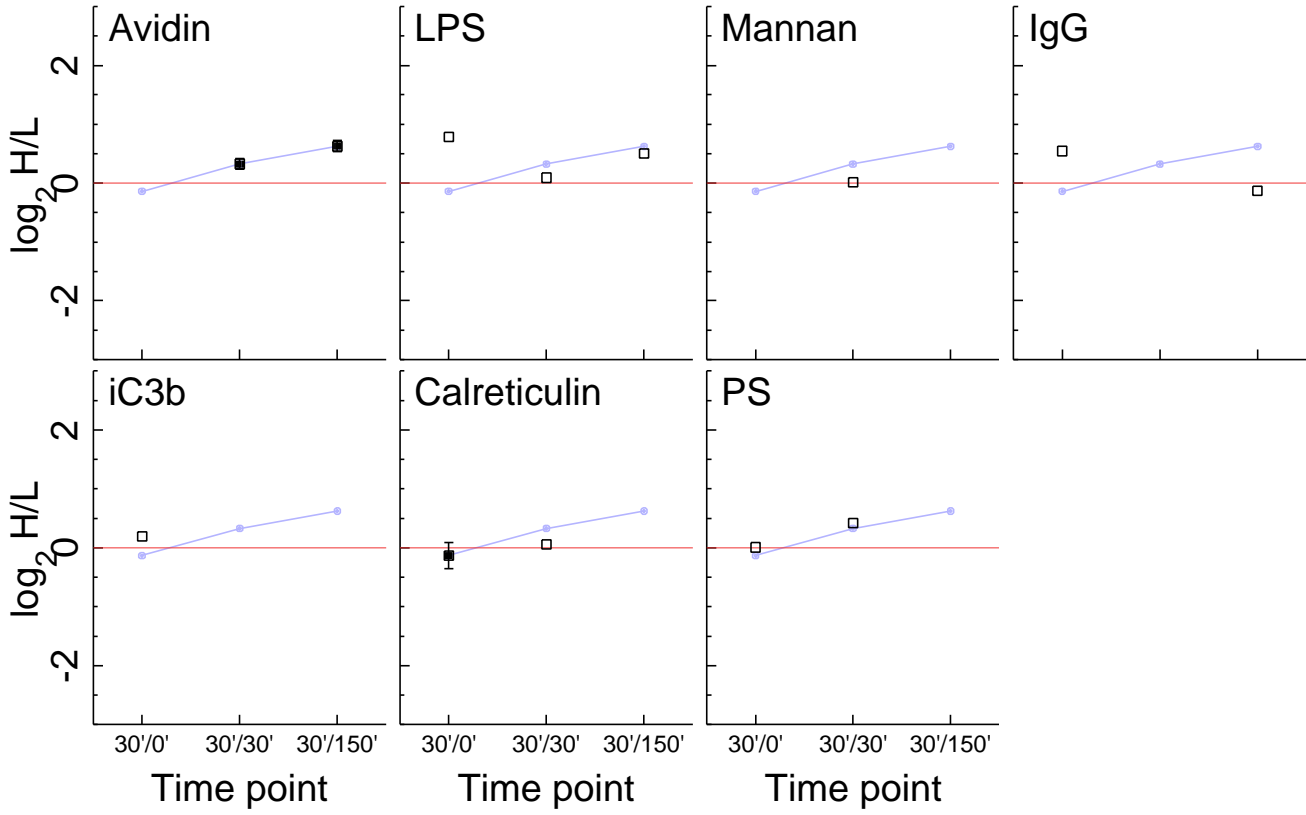

### dpp7 (Q9ET22)

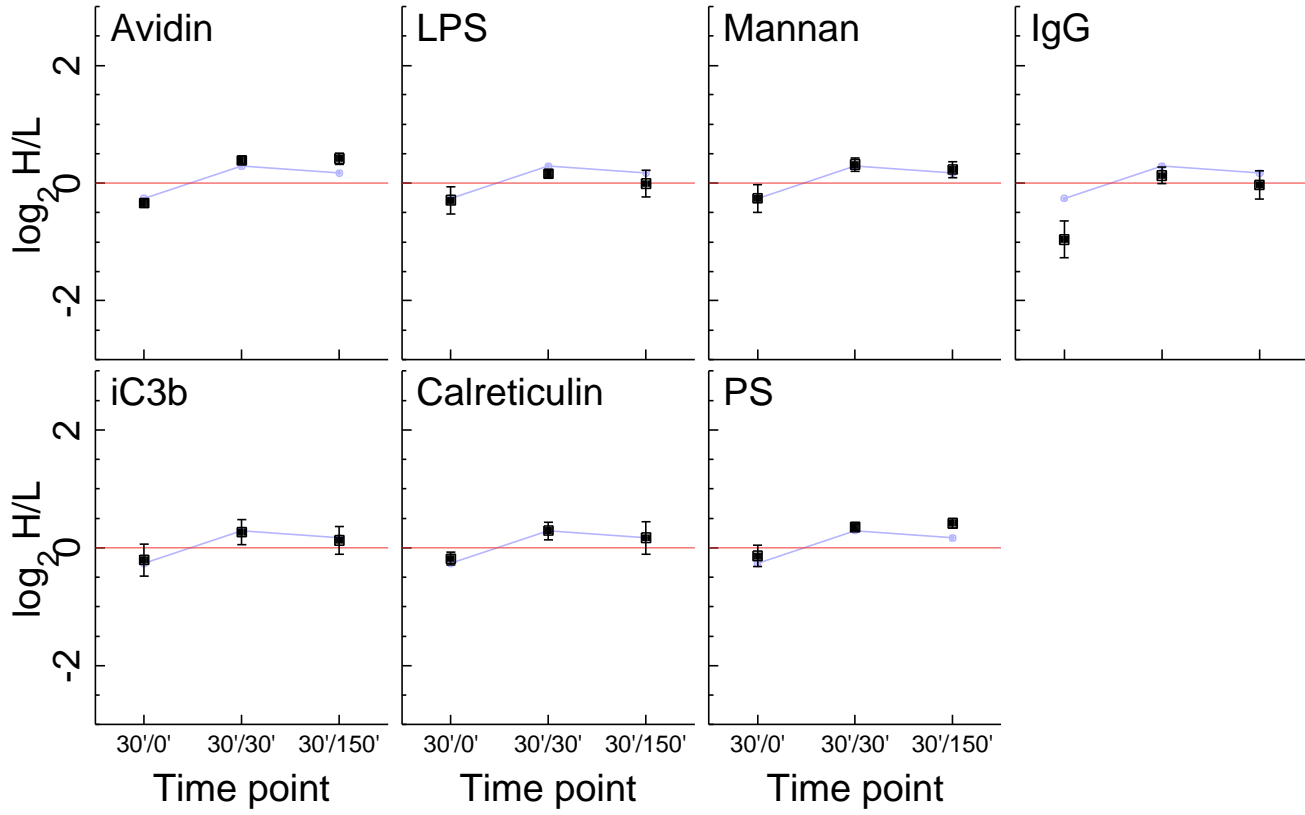

dpysl2 (O08553)

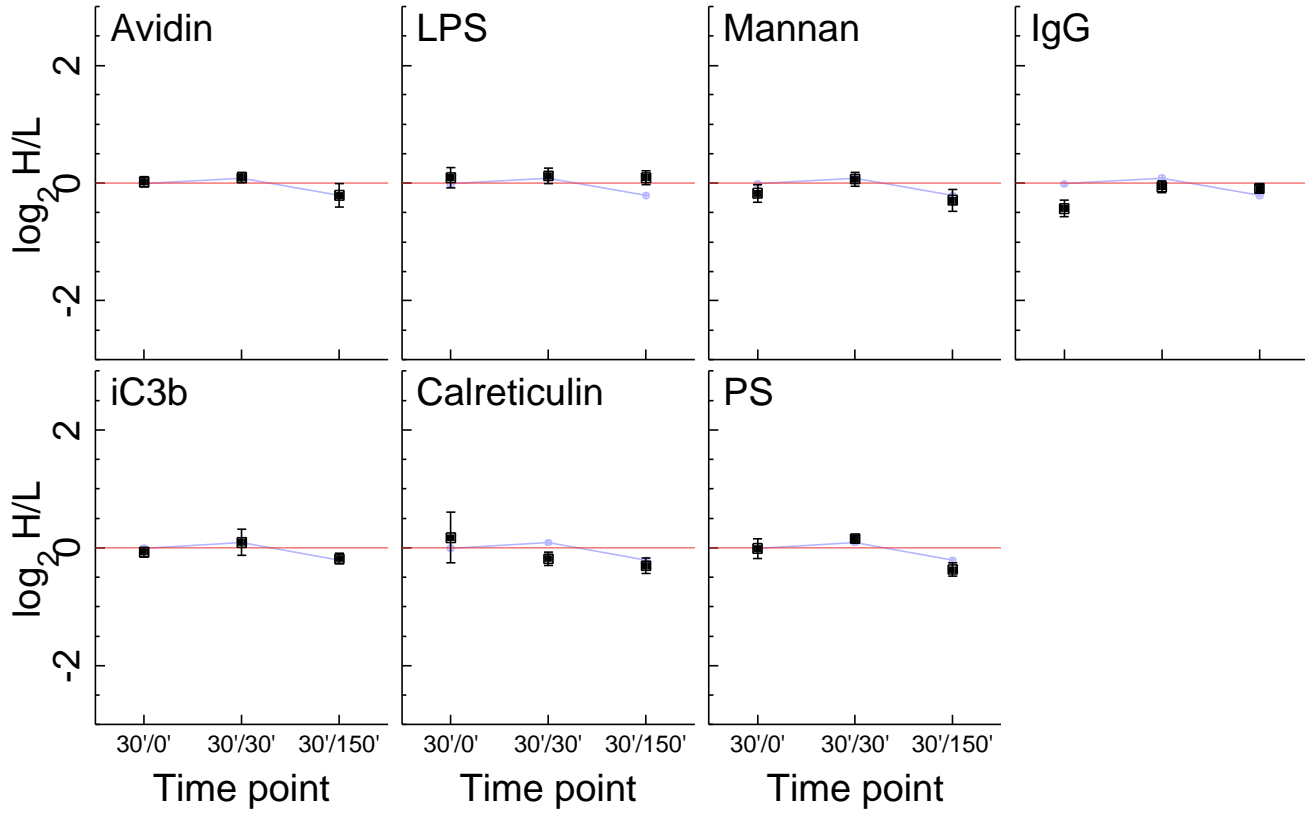

### dram1 (Q9DC58)

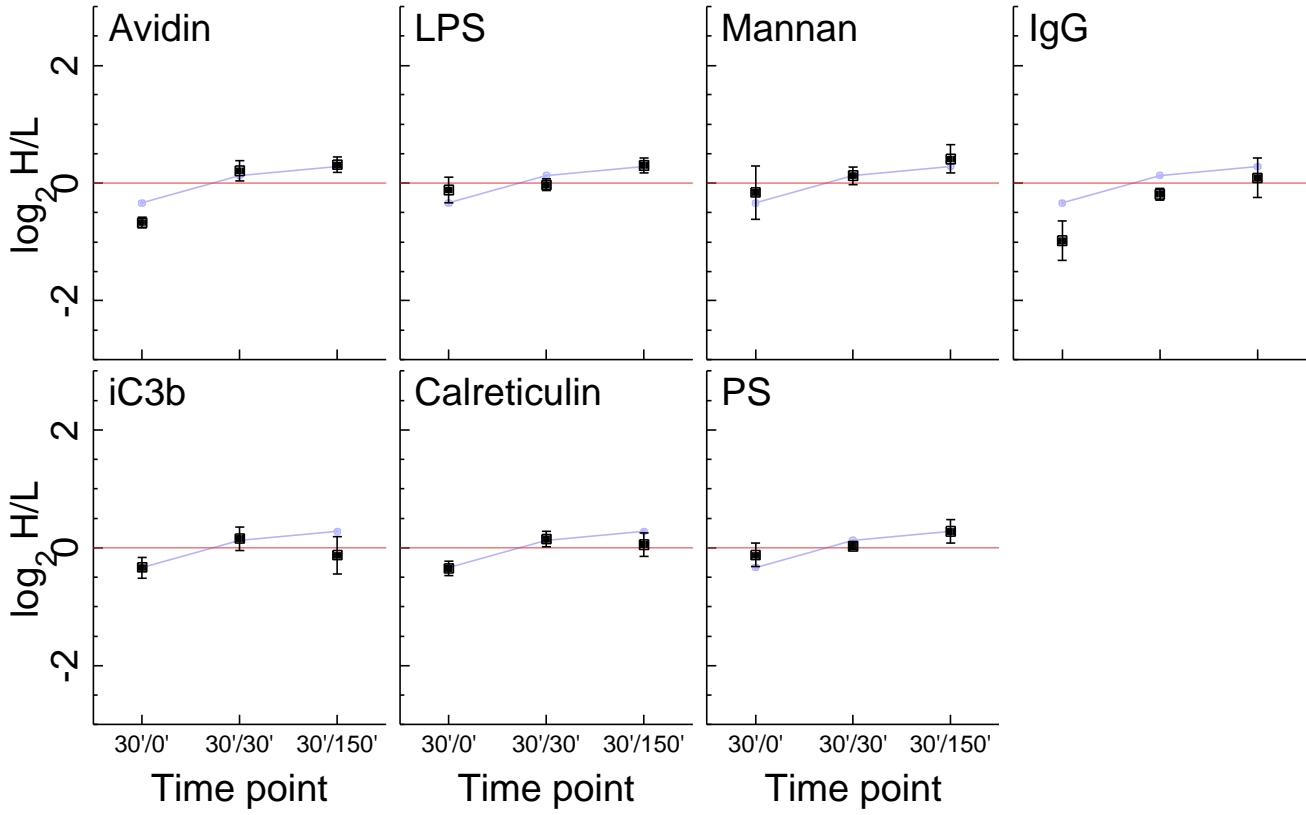

dram2 (Q9CR48)

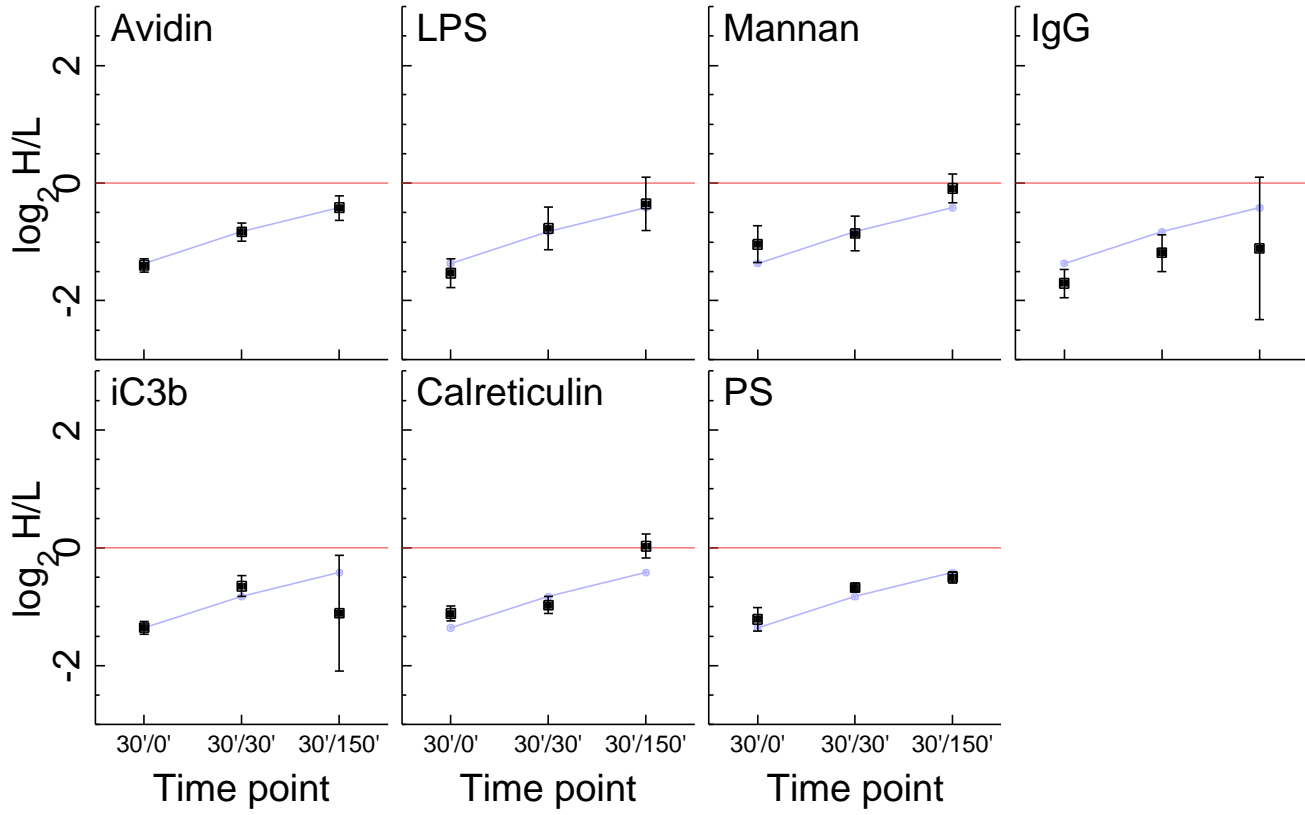

### drg1 (P32233)

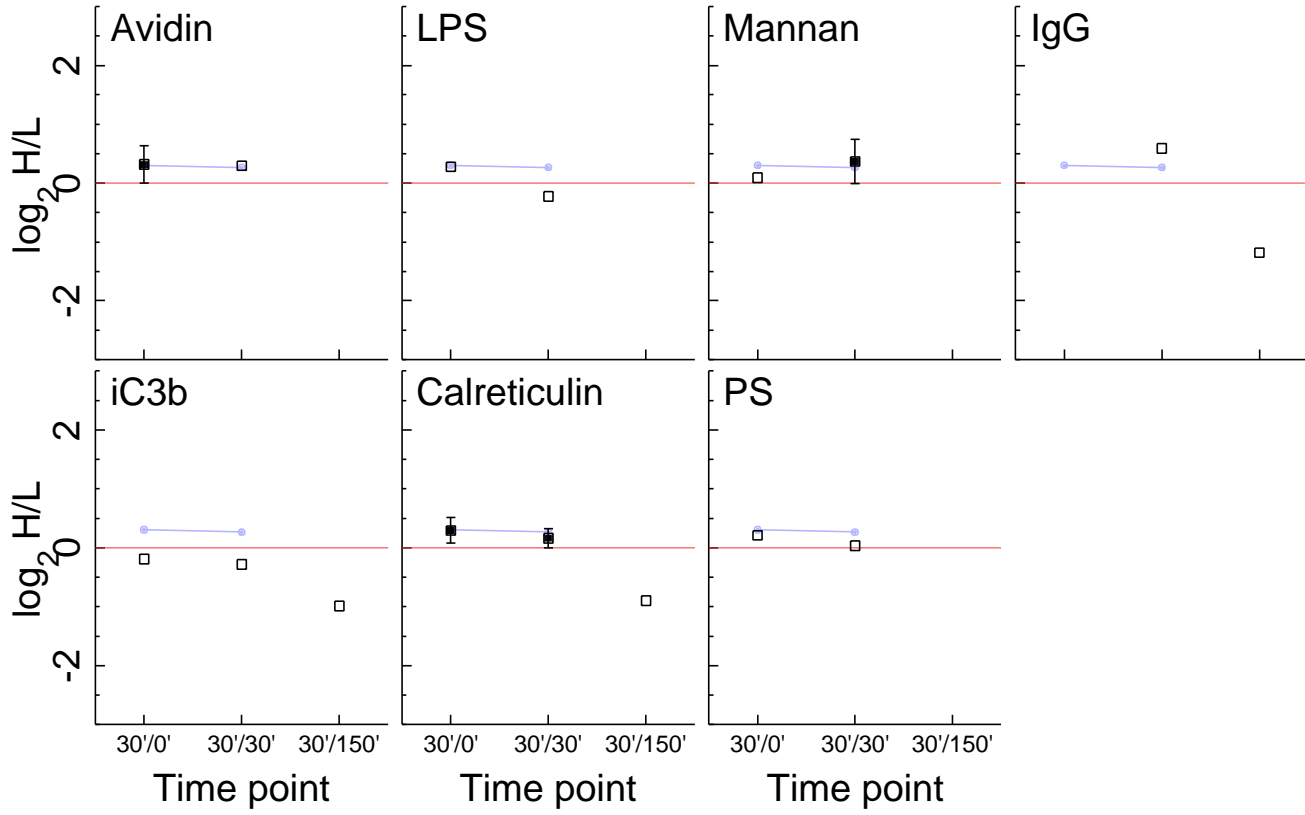

dscr3 (O35075)

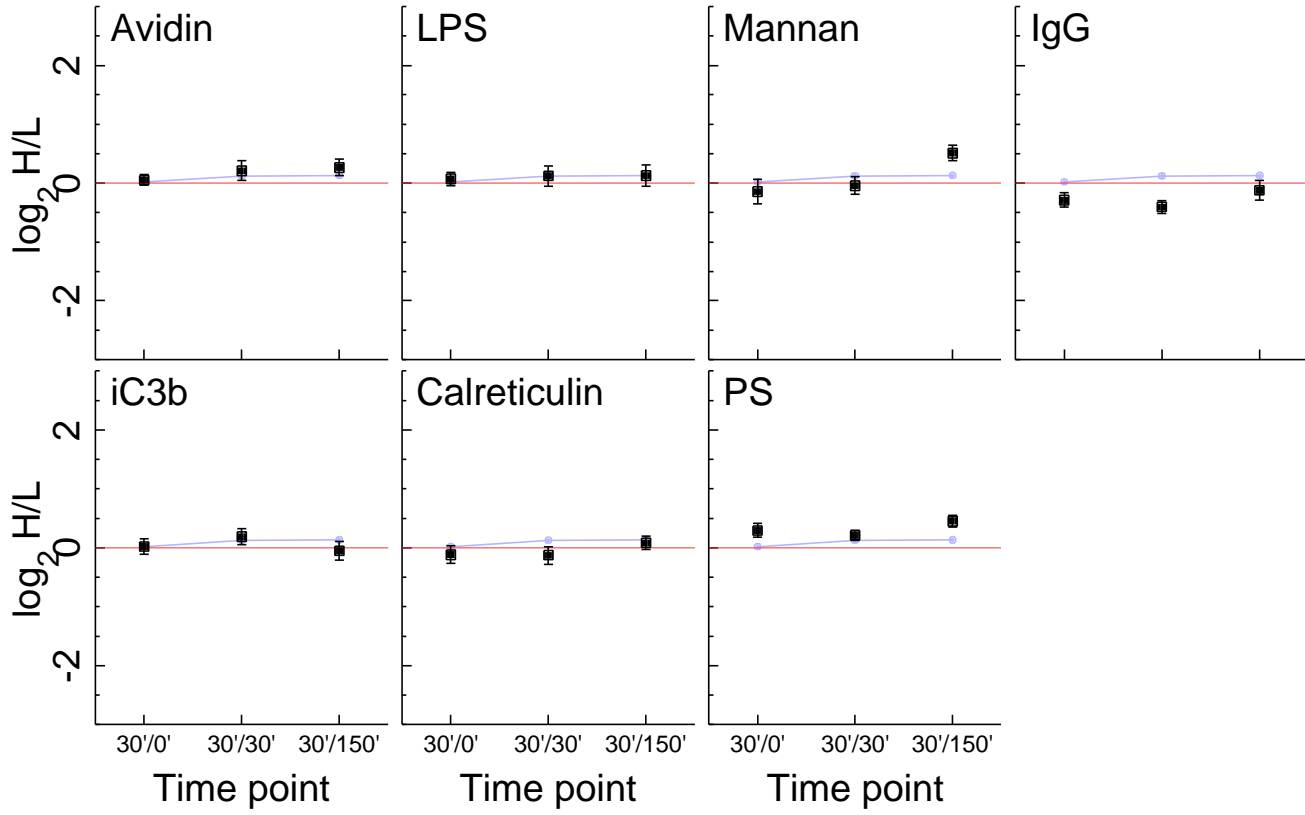

dstyk (Q6XUX1)

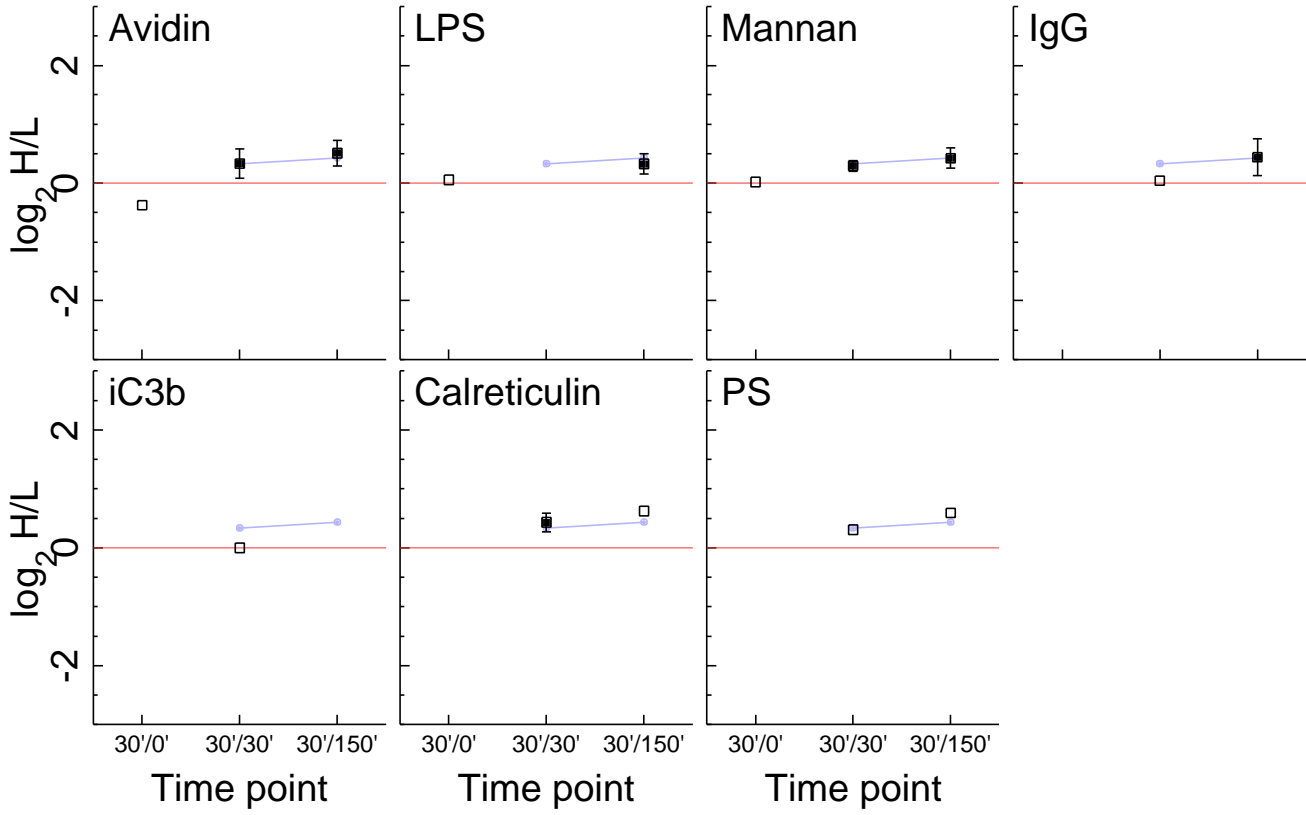



### dtx3l (Q3UIR3)

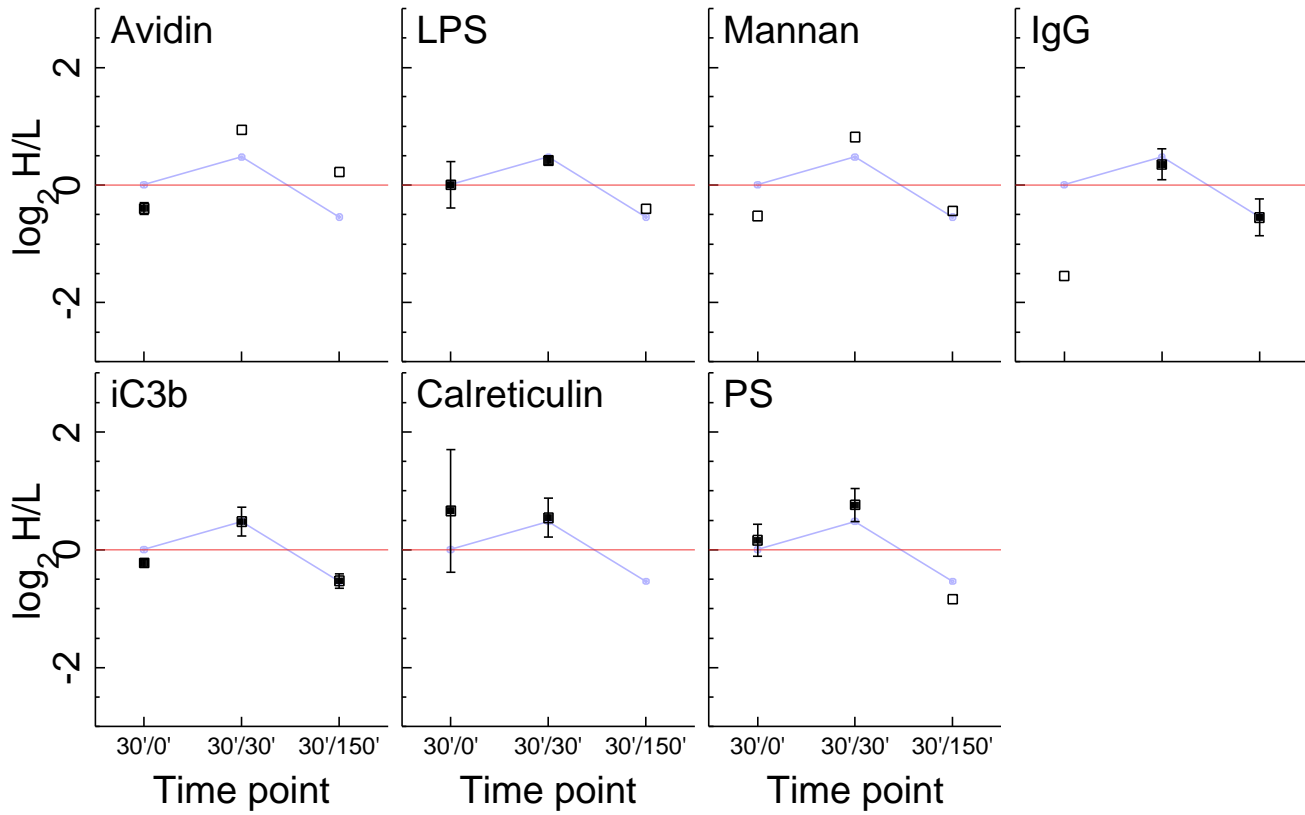

### dusp22 (Q99N11)

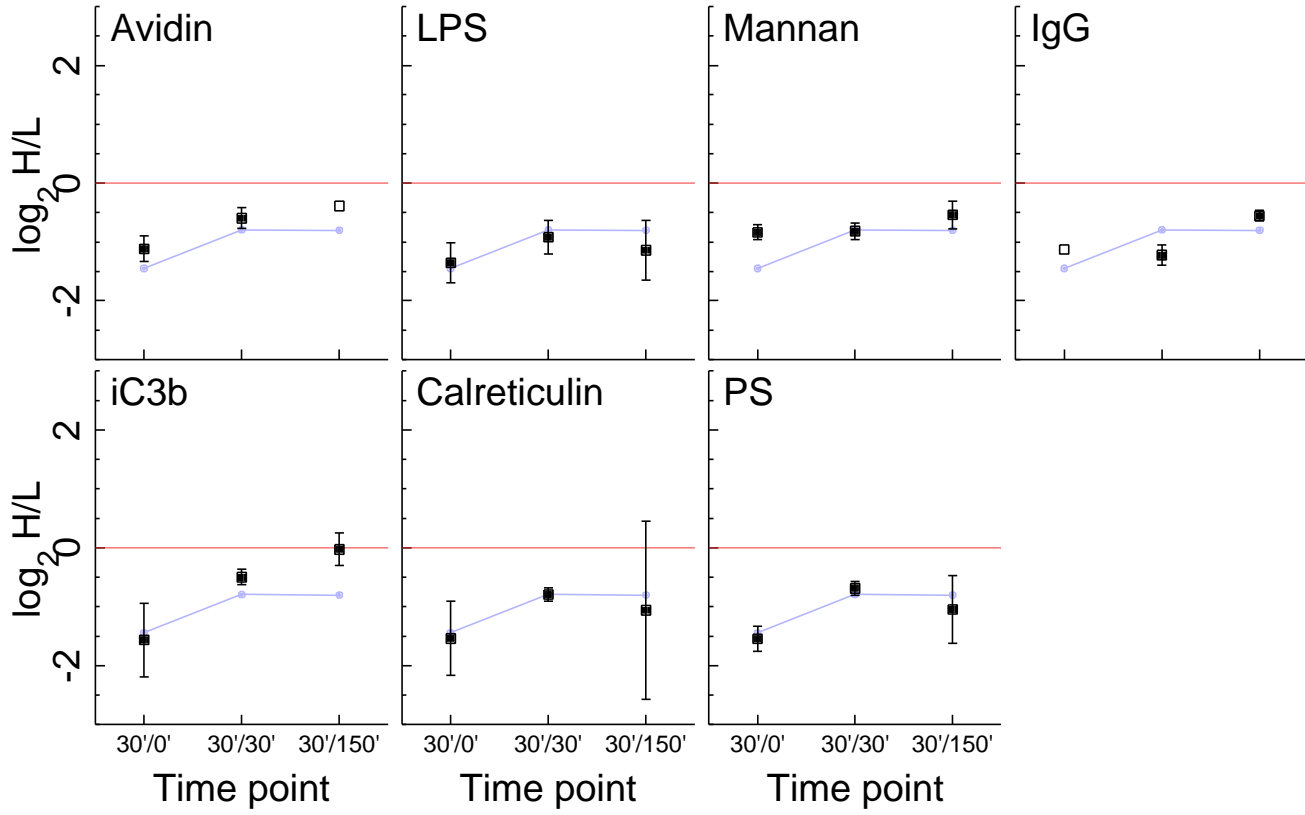

dusp3 (B1AQF4)

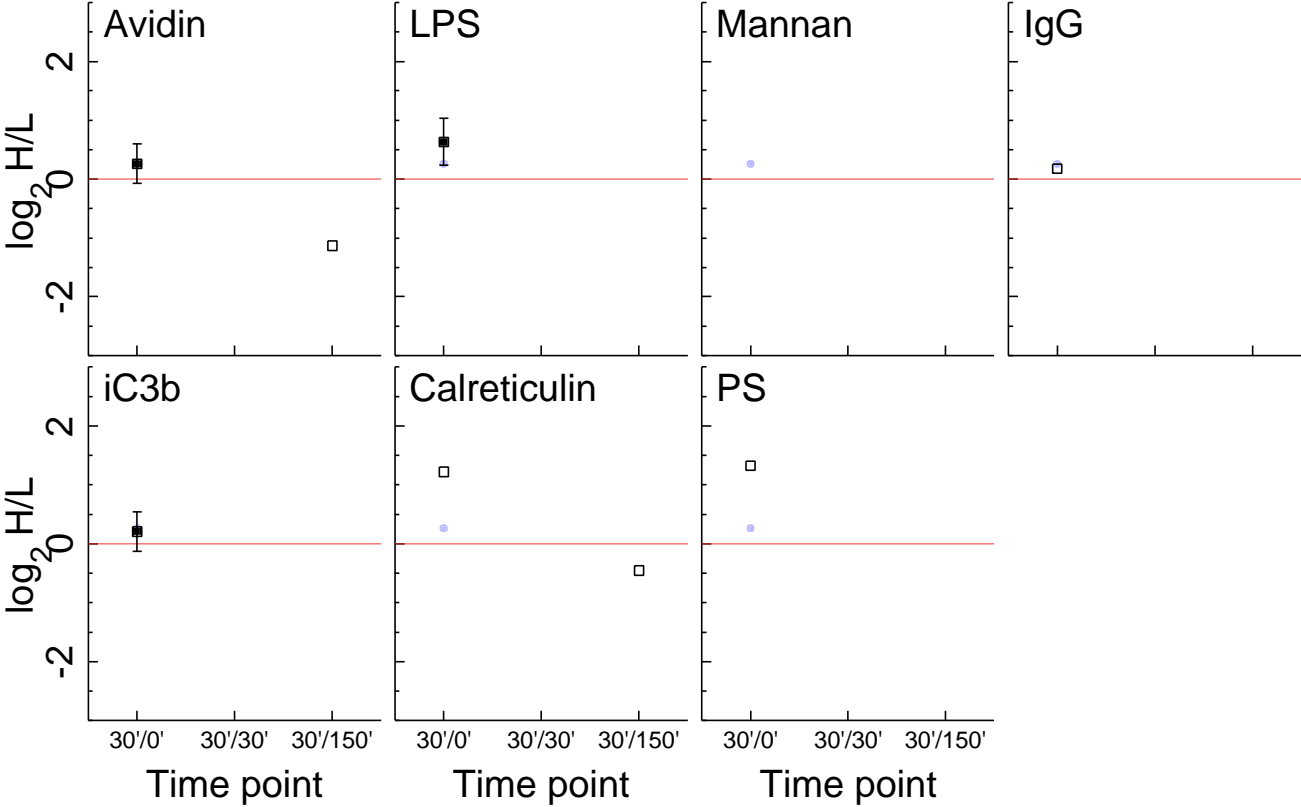

dync1h1 (Q9JHU4)

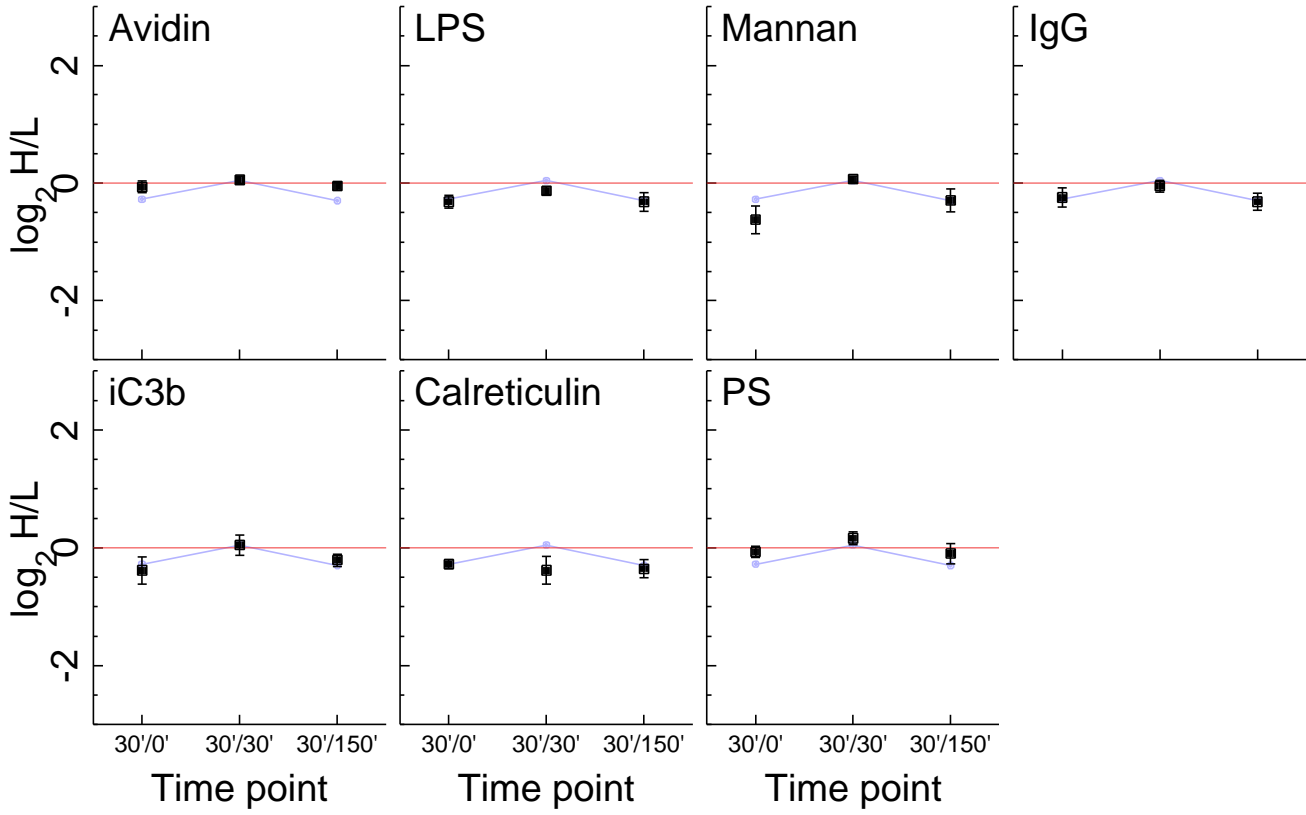

dync1i2 (A2BFF9)

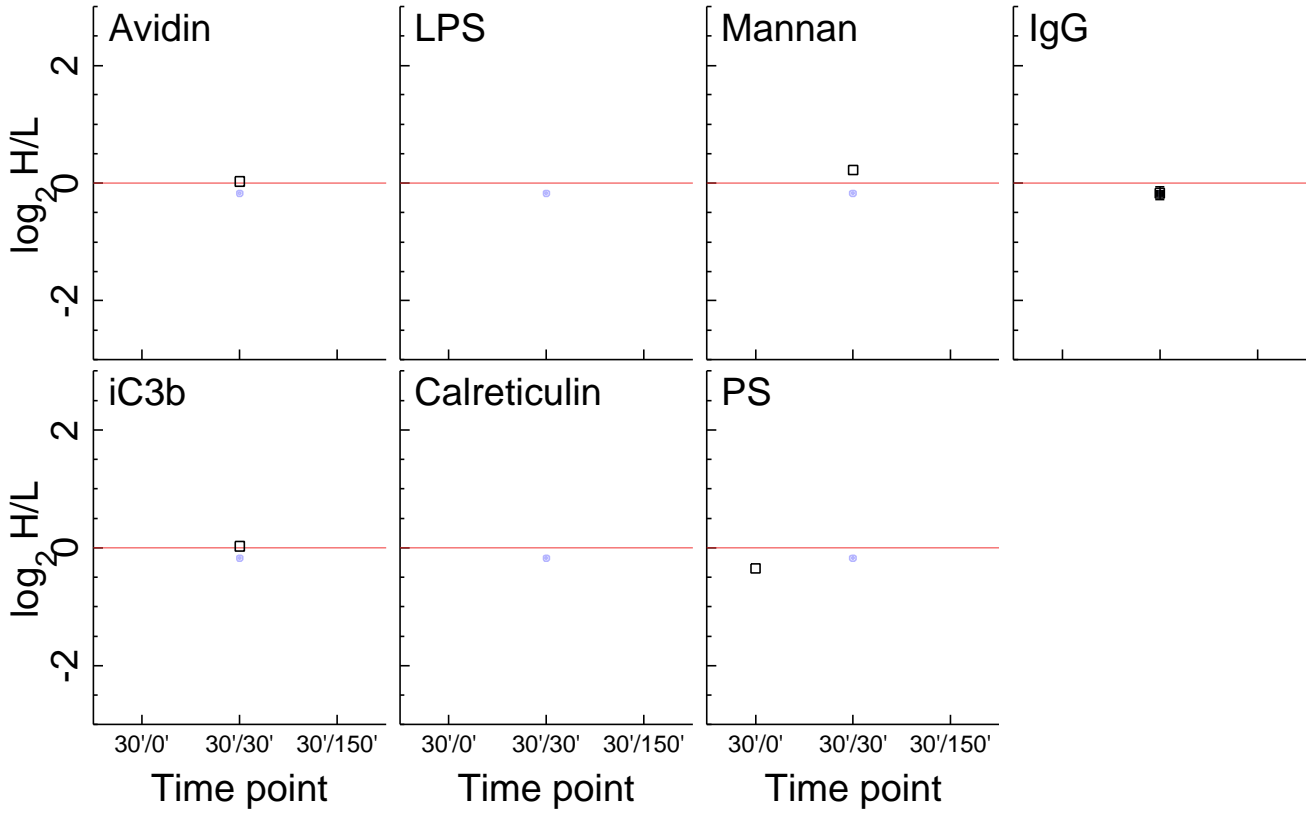

### dync1li1 (Q8R1Q8)

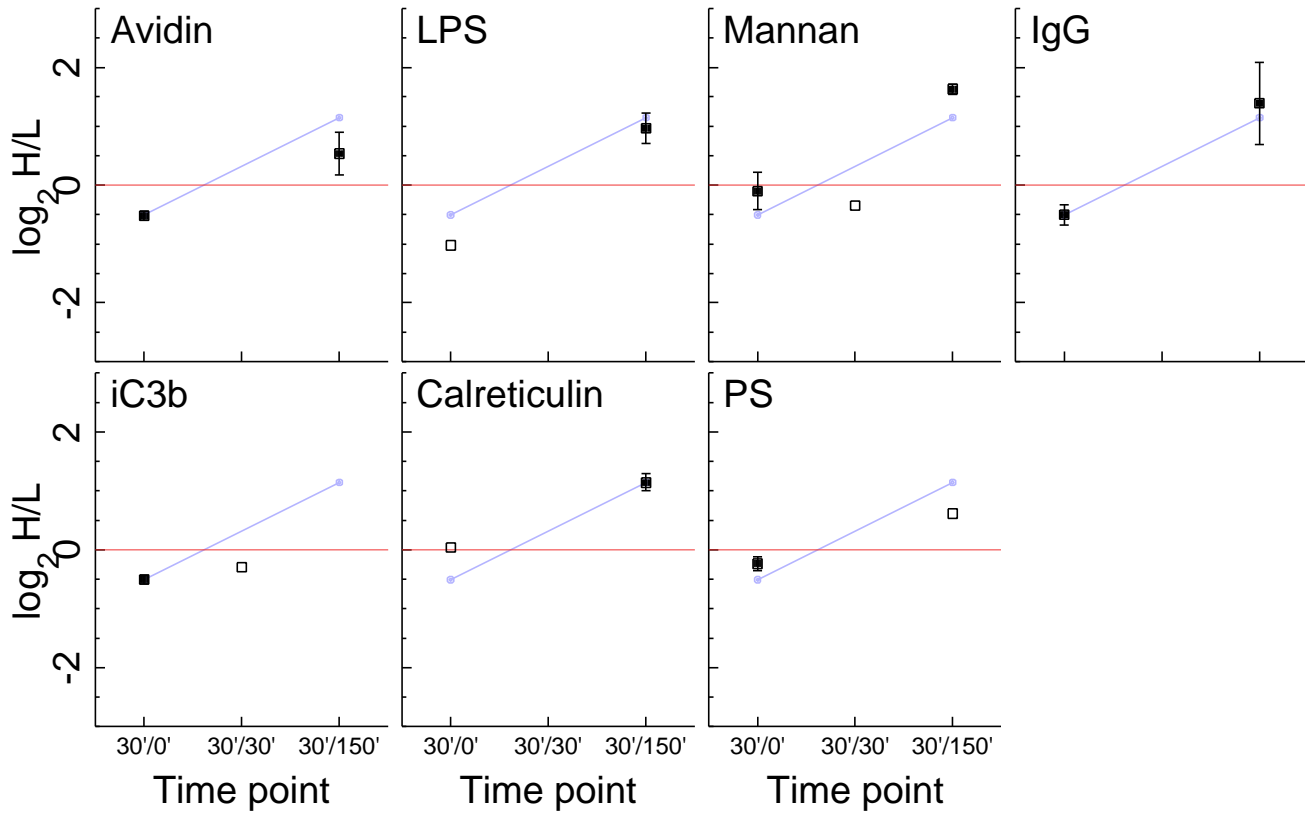

dynII2 (Q9D0M5)

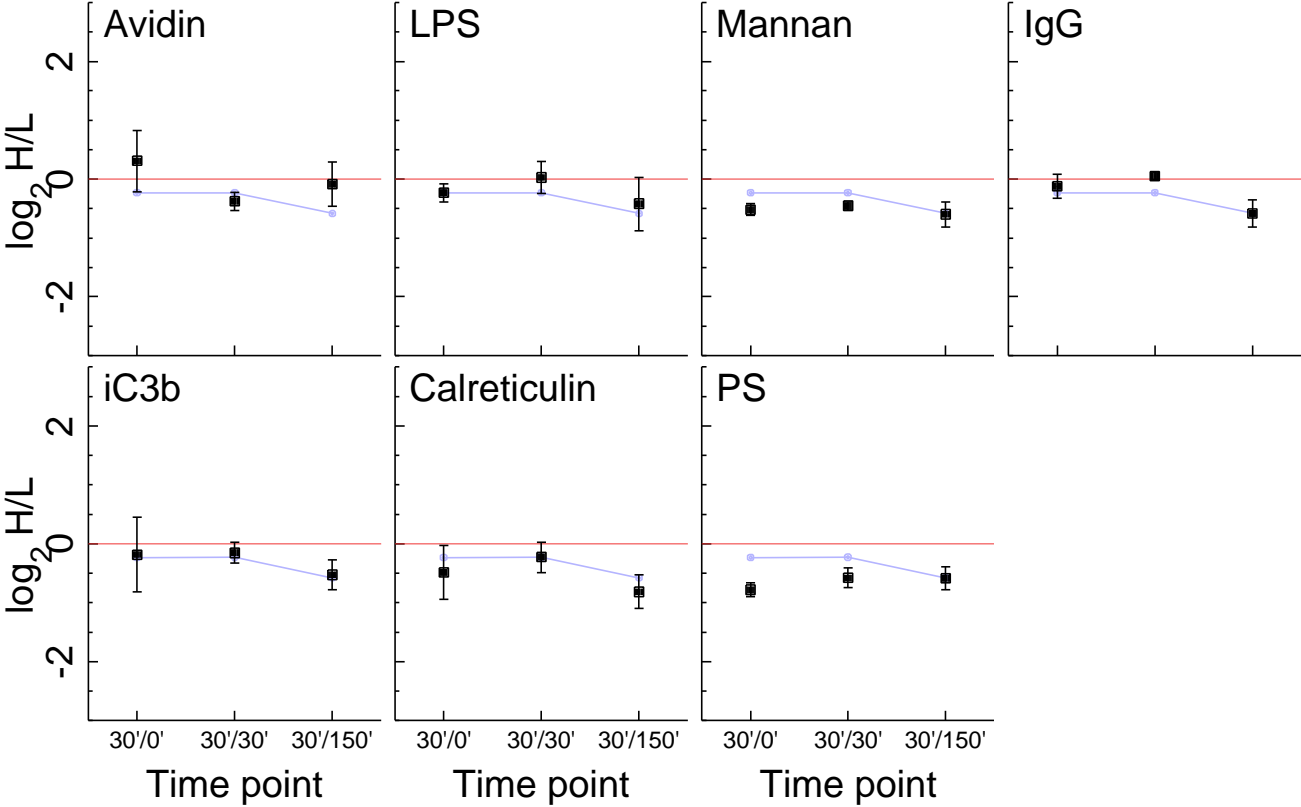

### dynlt1 (P51807)

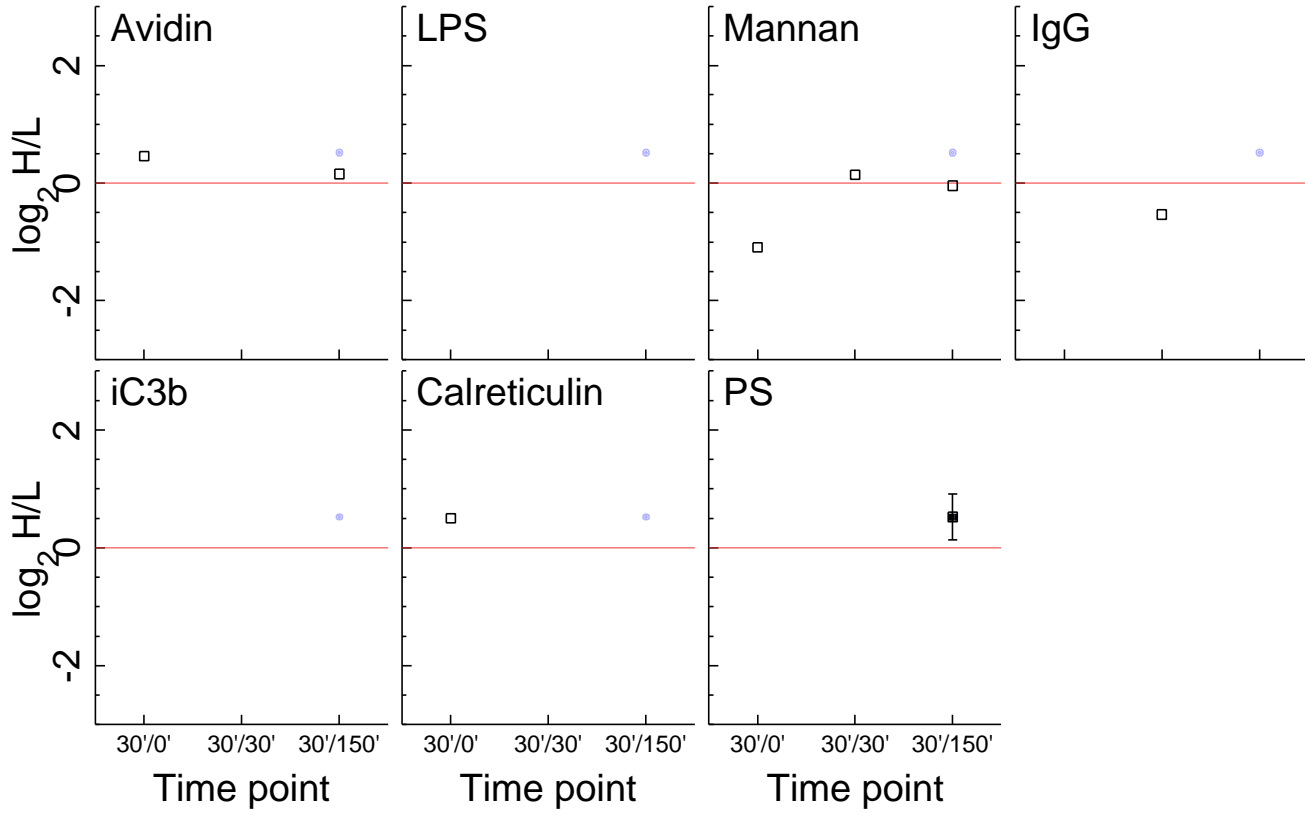



e030010n08rik (F6XLV1)

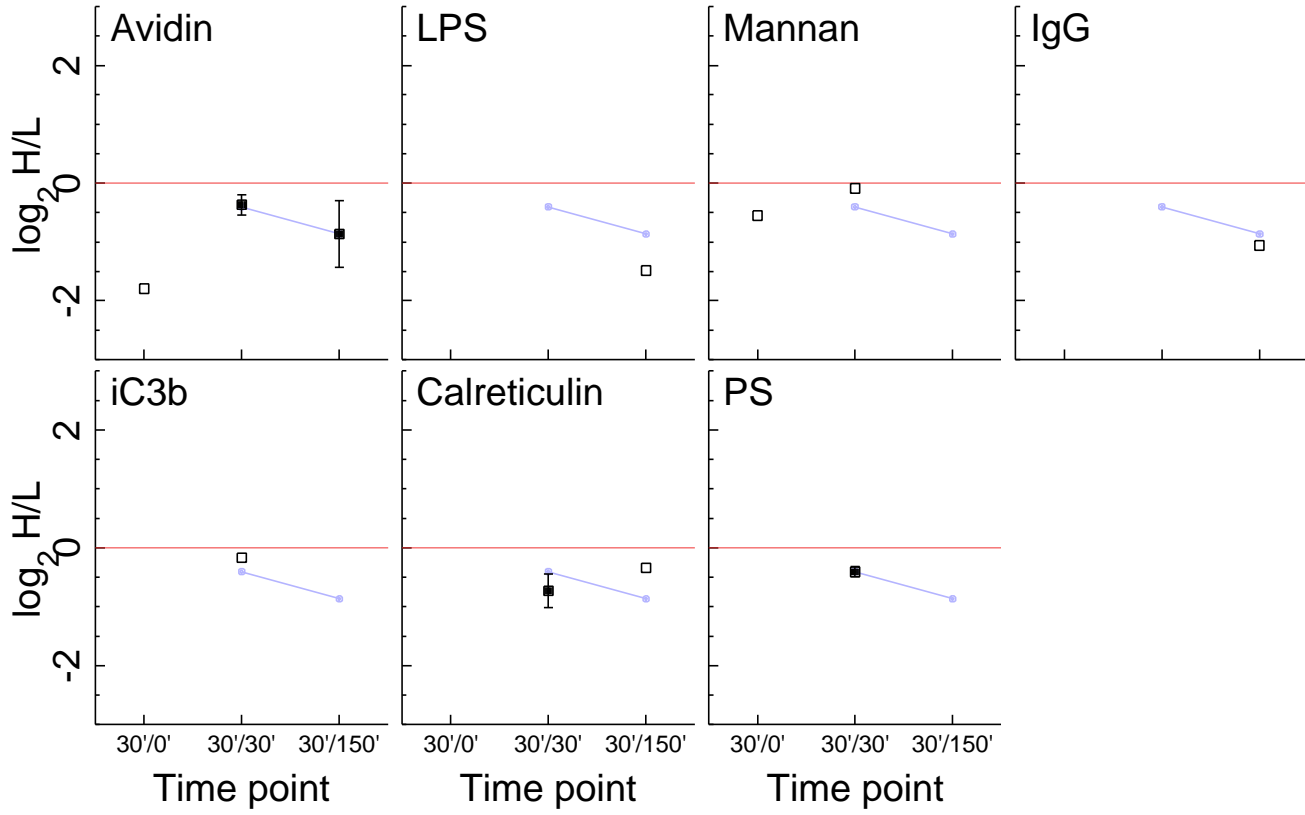

ear2 (P97425)

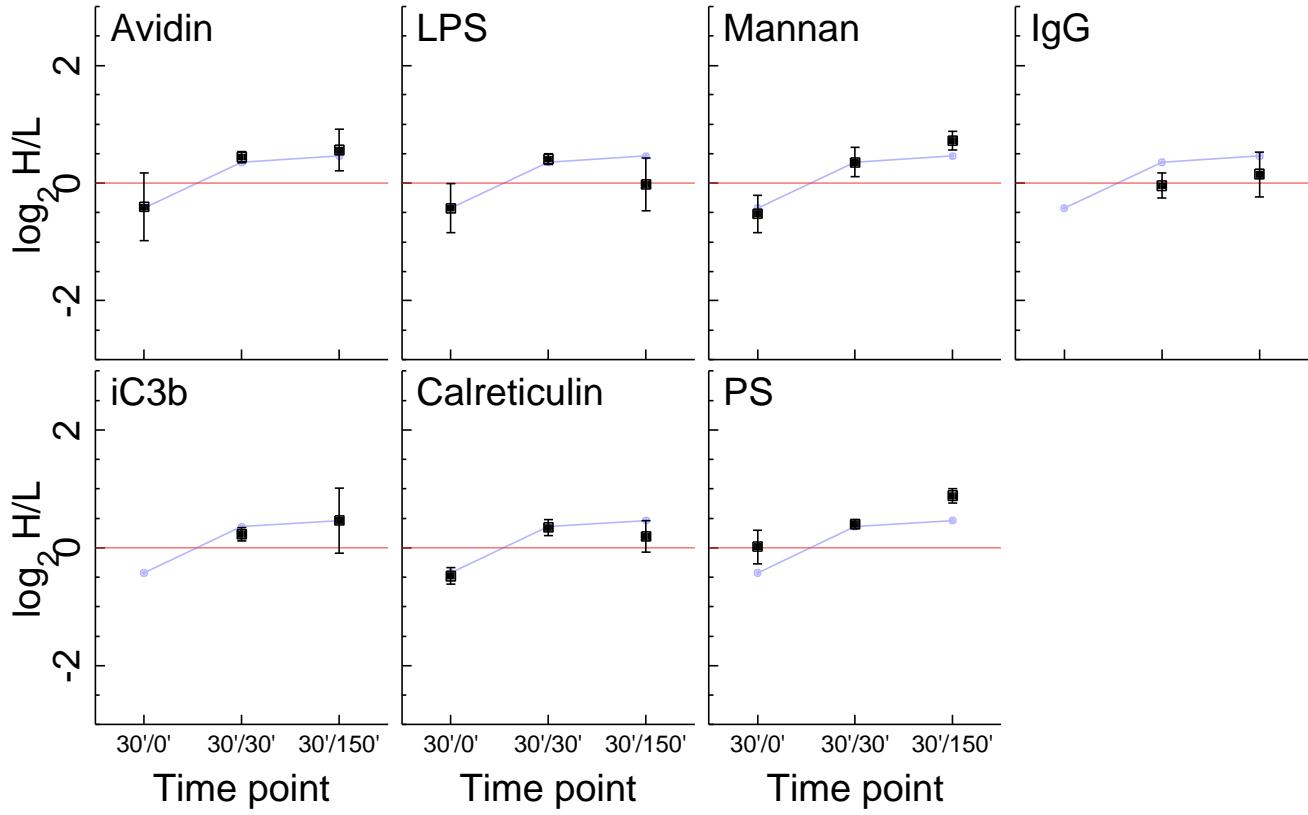

ece1 (Q4PZA2)

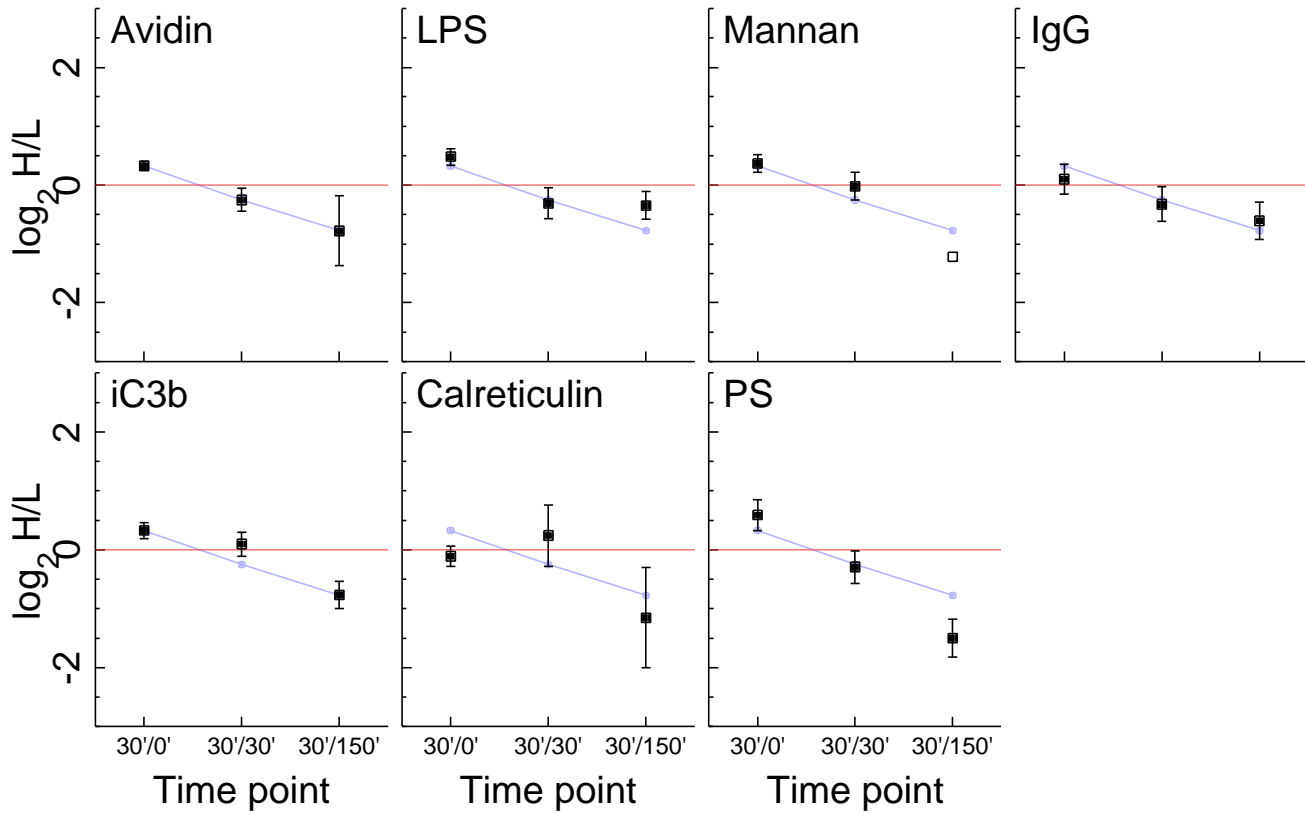

echs1 (Q8BH95)

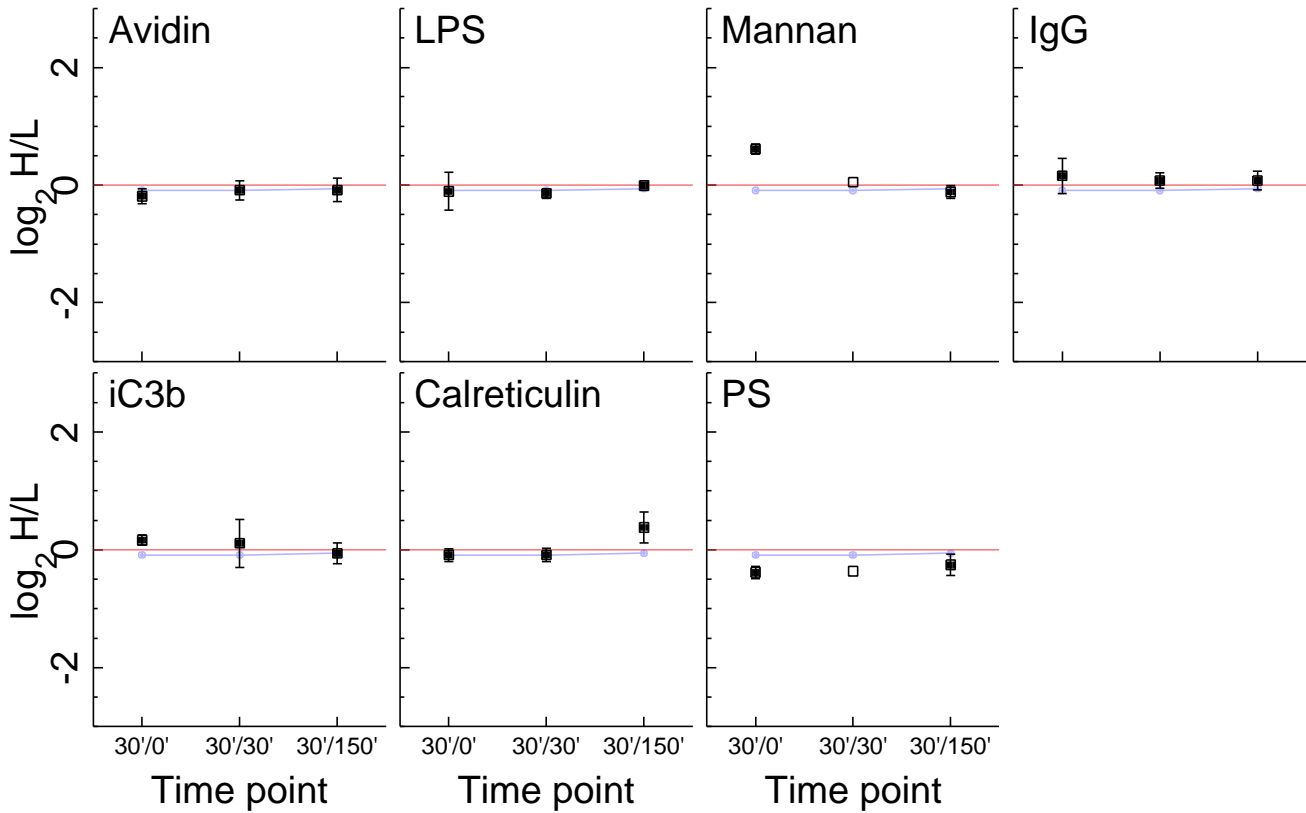

edil3 (O35474)

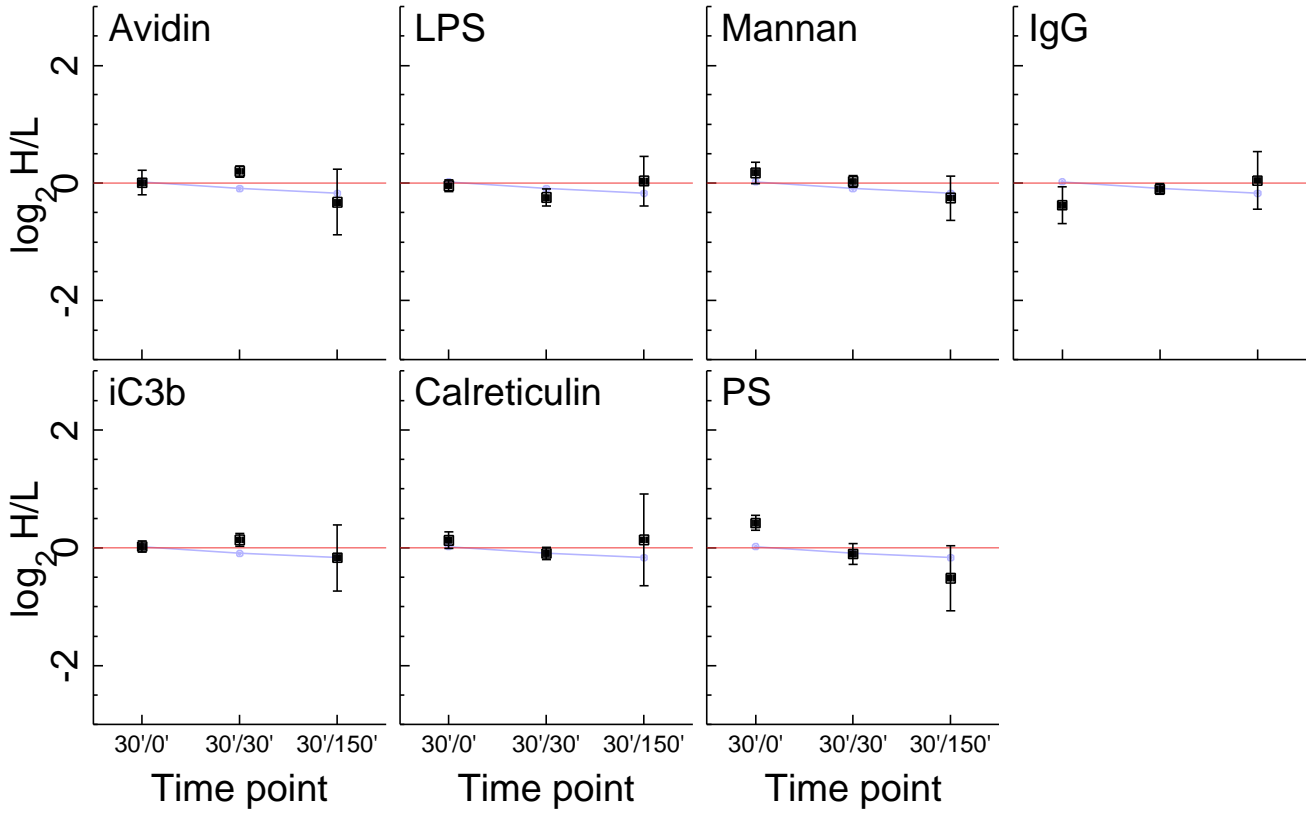

eea1 (Q8BL66)

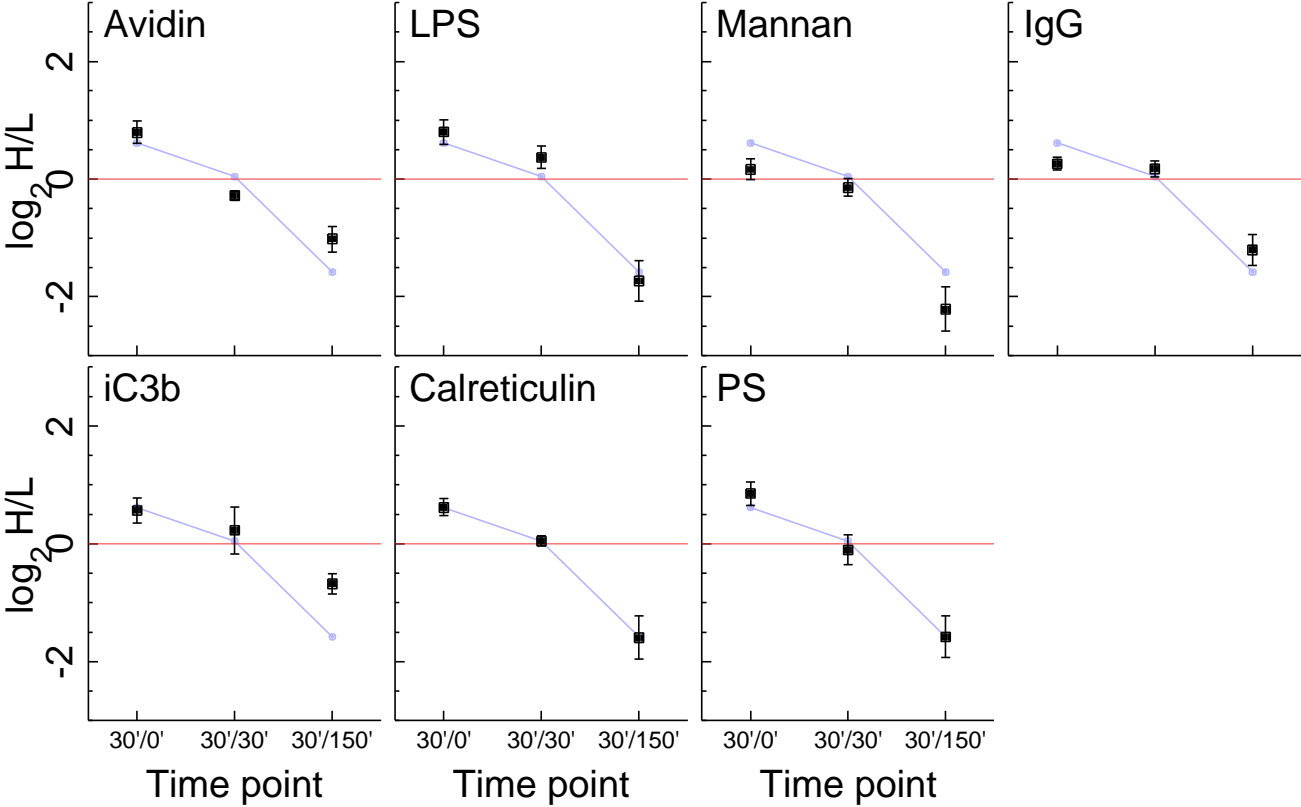

eef1a1 (P10126)

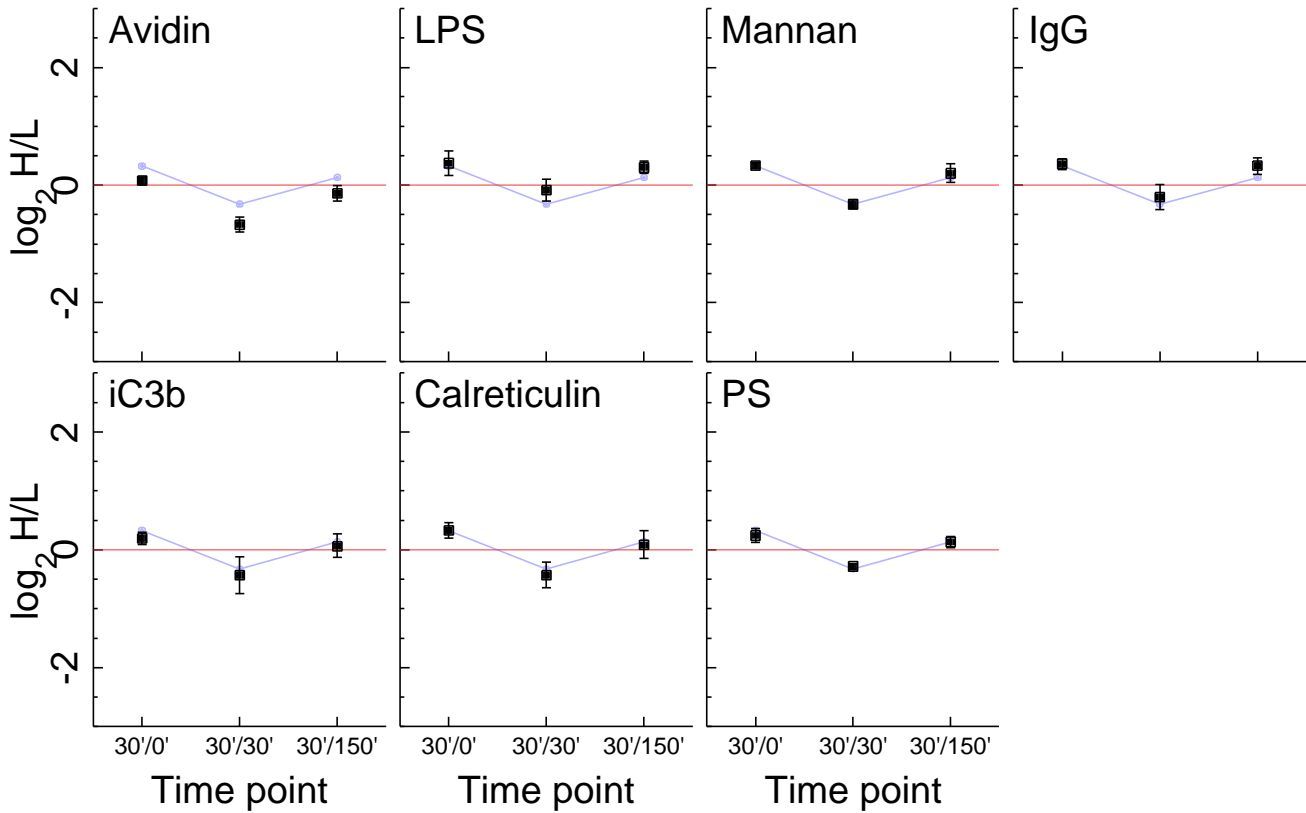

### eef1b (O70251)

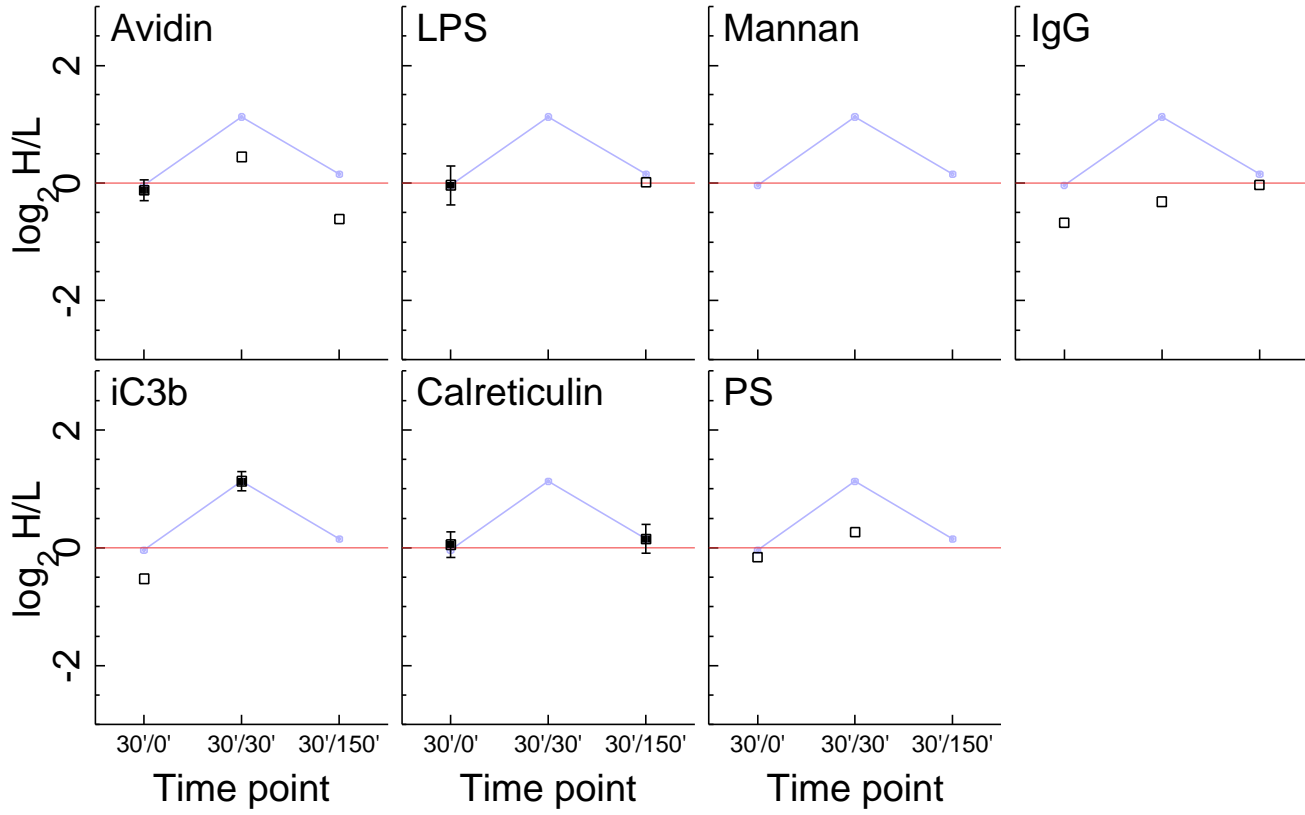



eef1d (P57776)

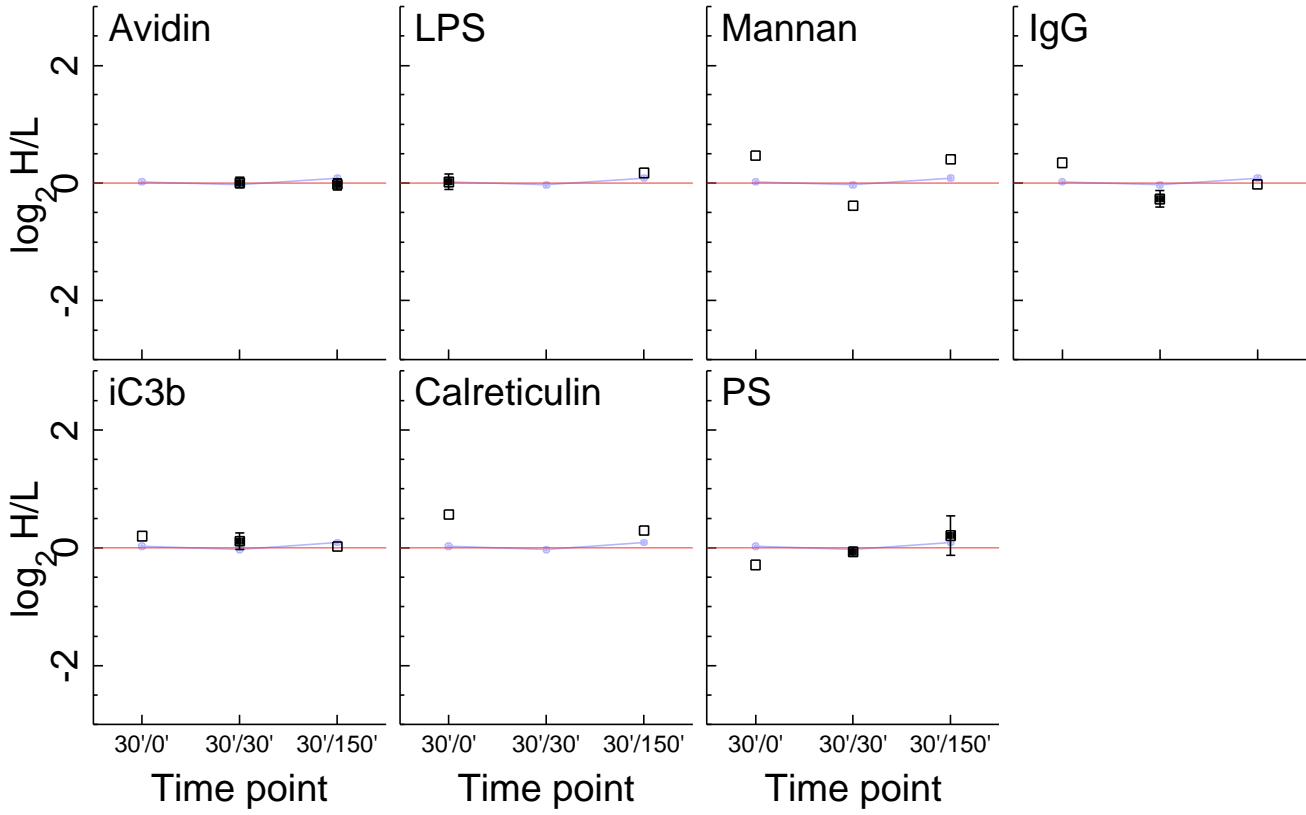

### eef1g (Q9D8N0)

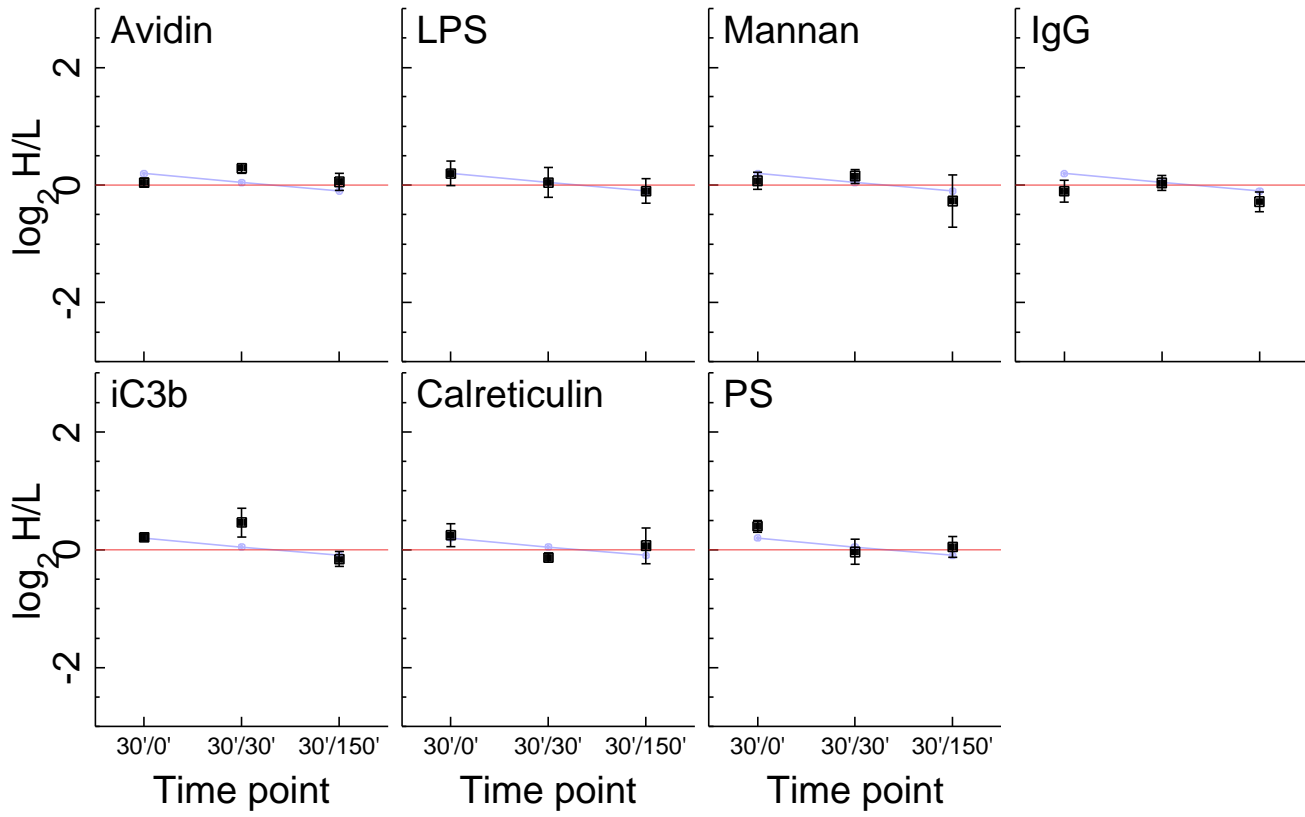

### eef2 (P58252)

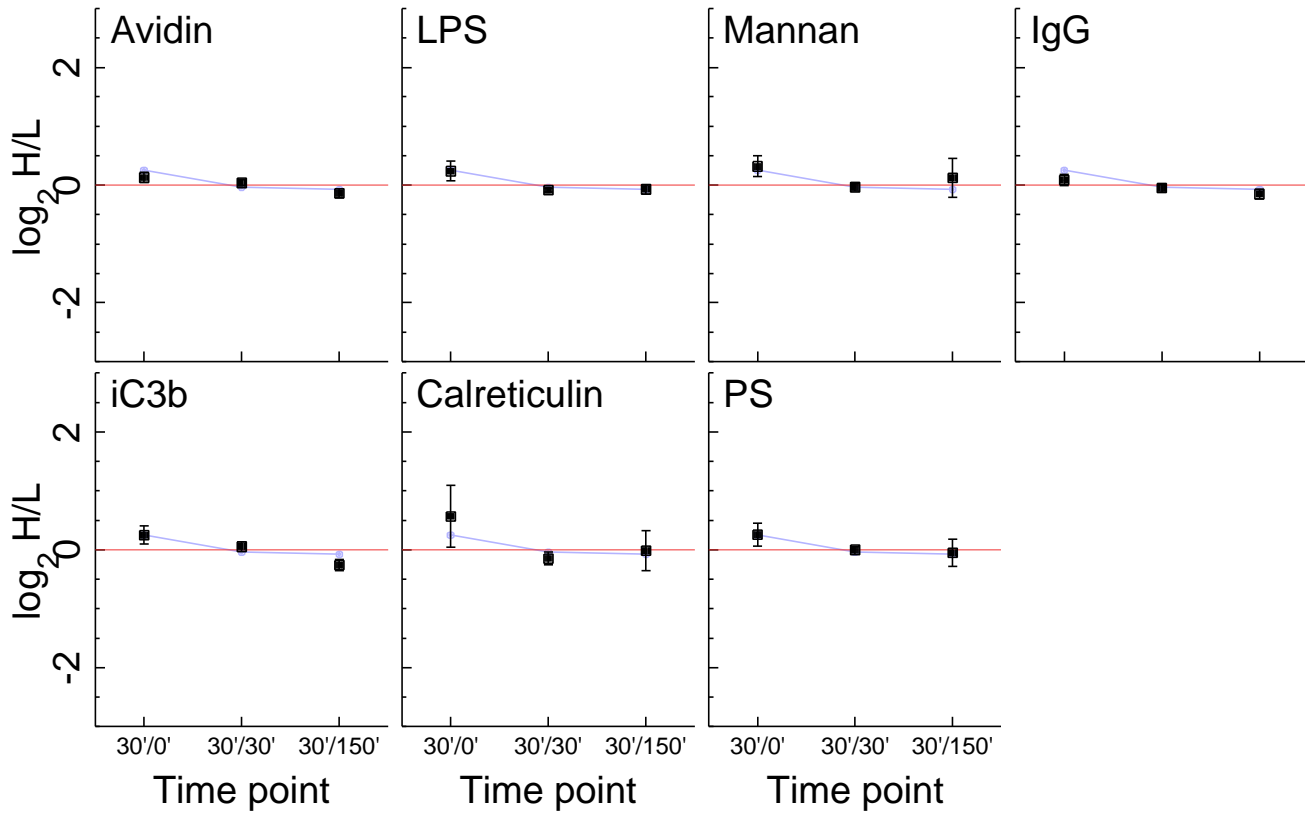

efhd2 (Q8C845)

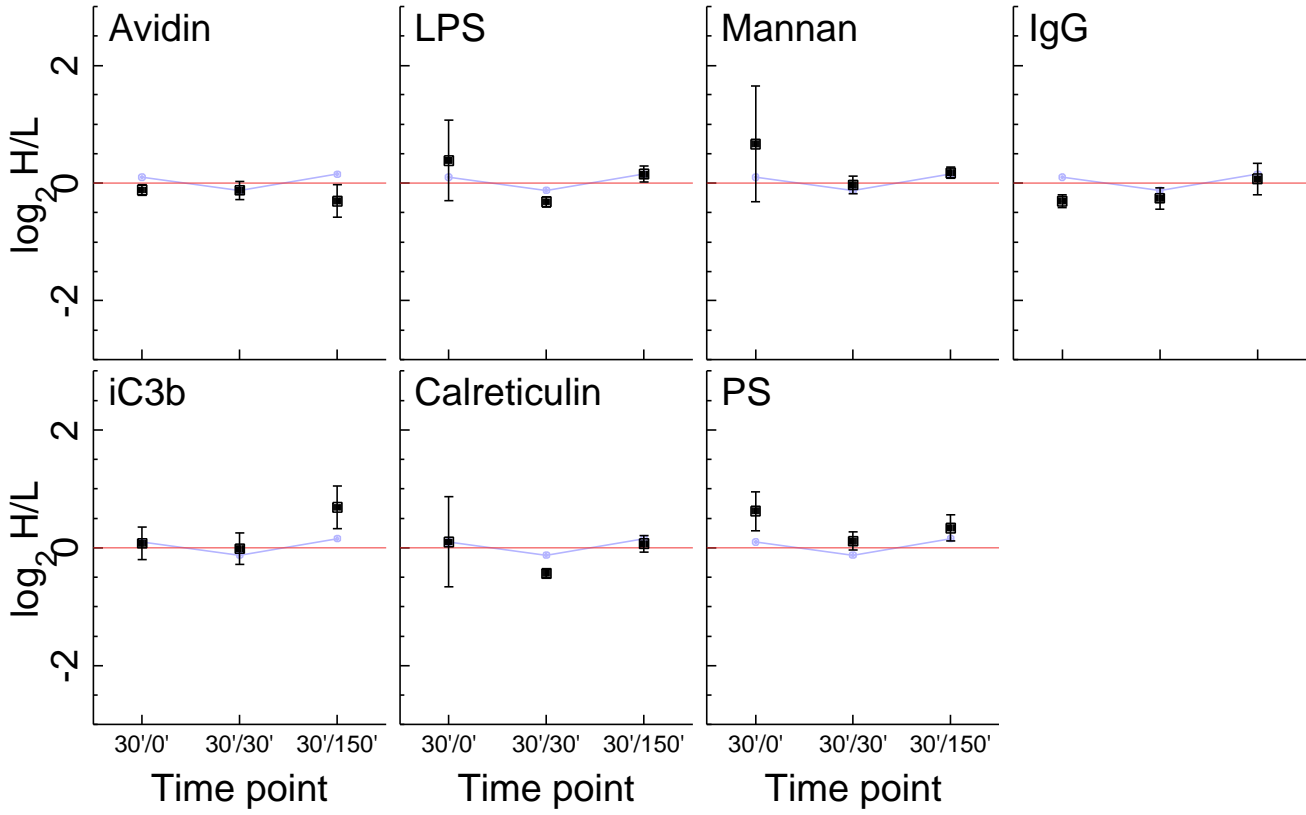

ehbp111 (E9QP49)

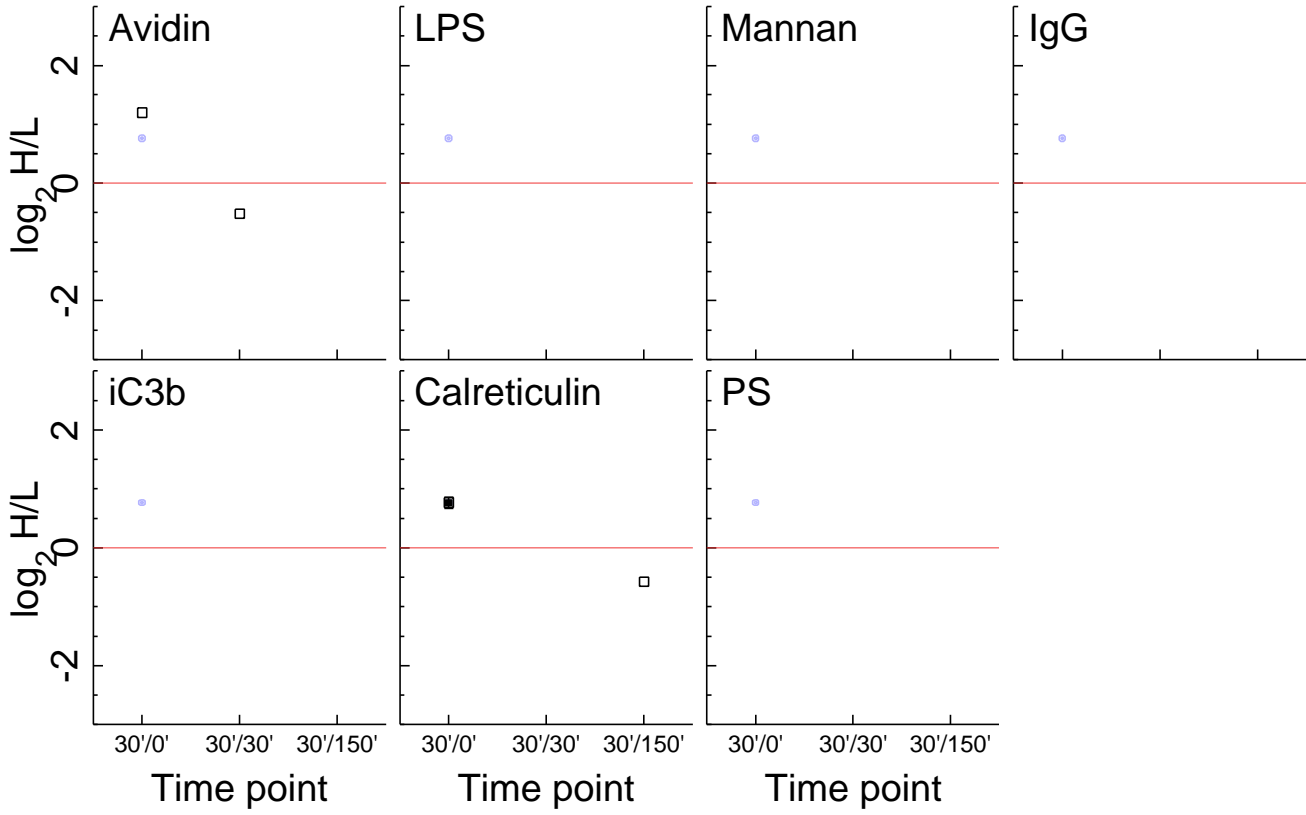

### ehd1 (Q9WVK4)

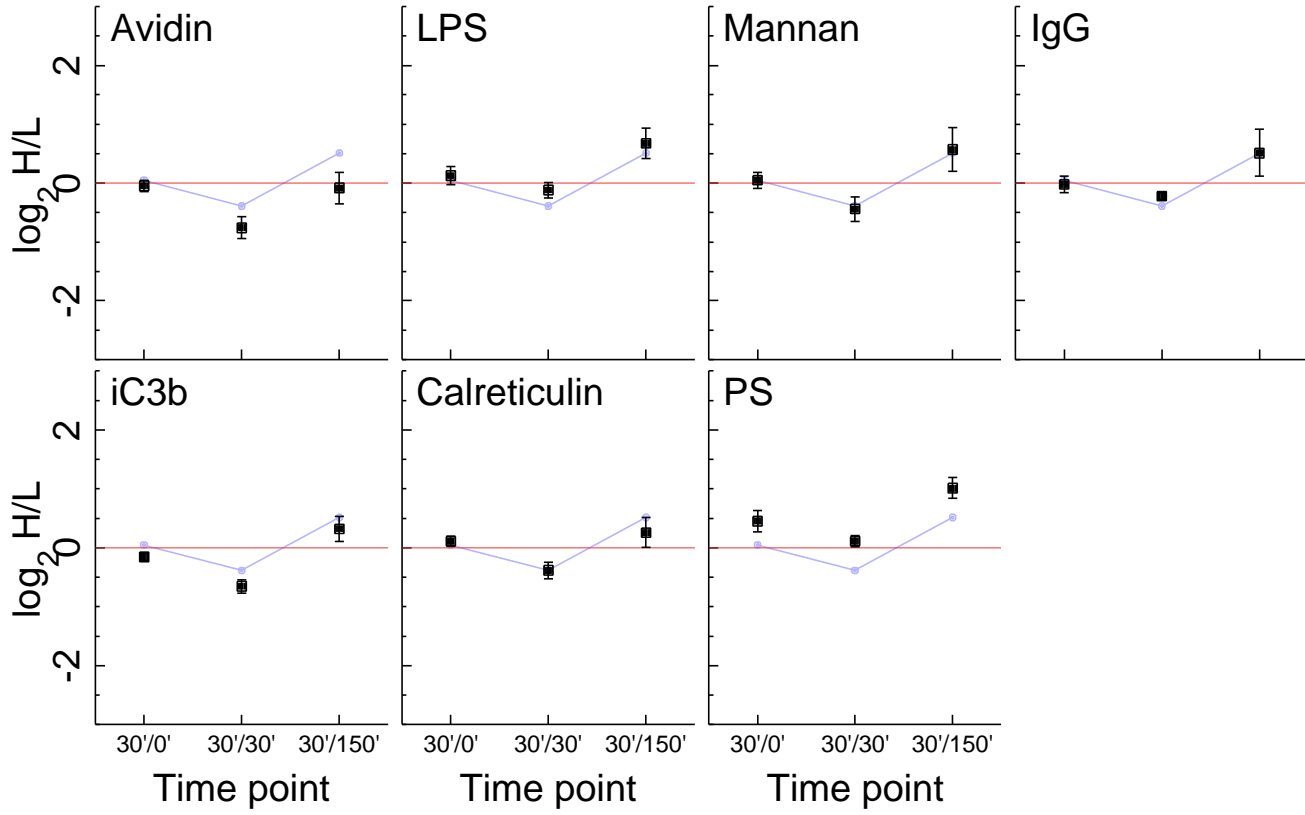

ehd4 (Q9EQP2)

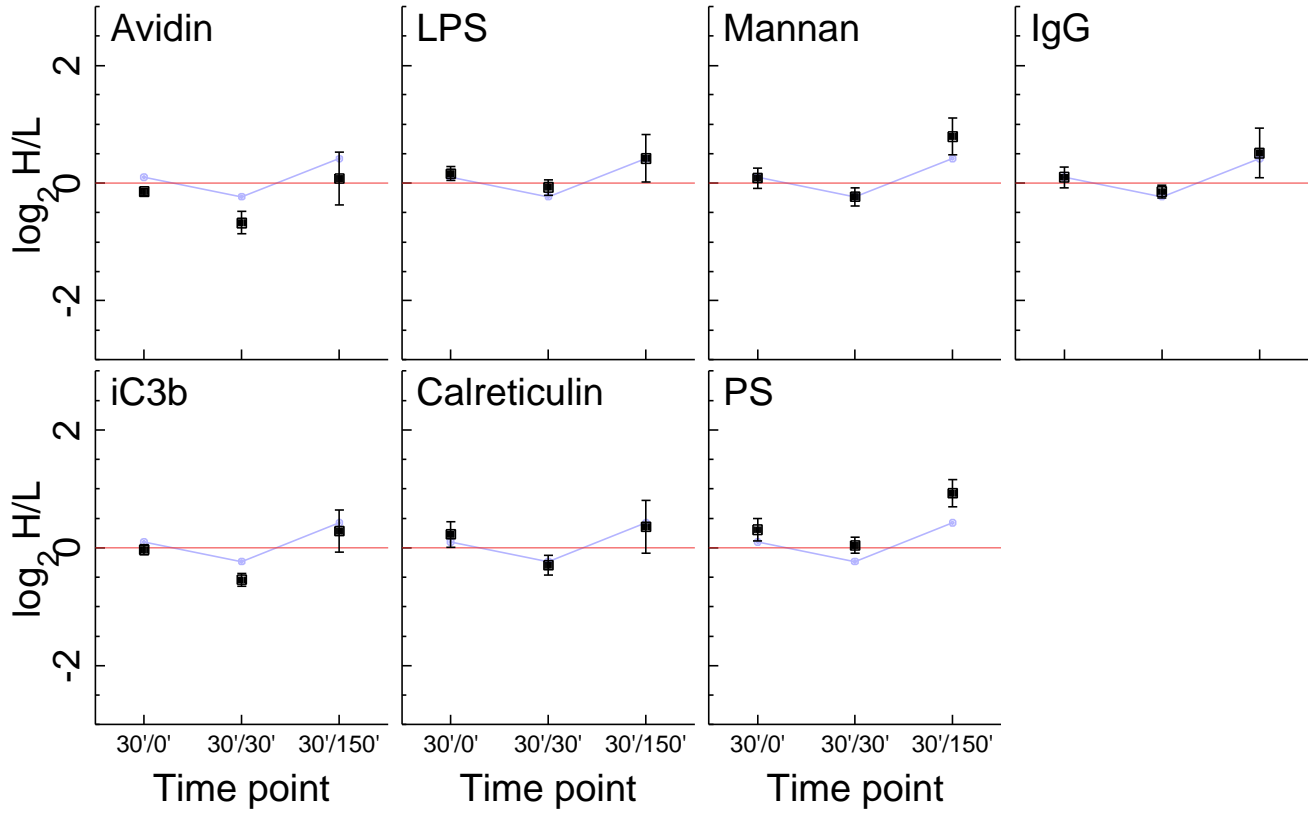

eif1a (Q60872)

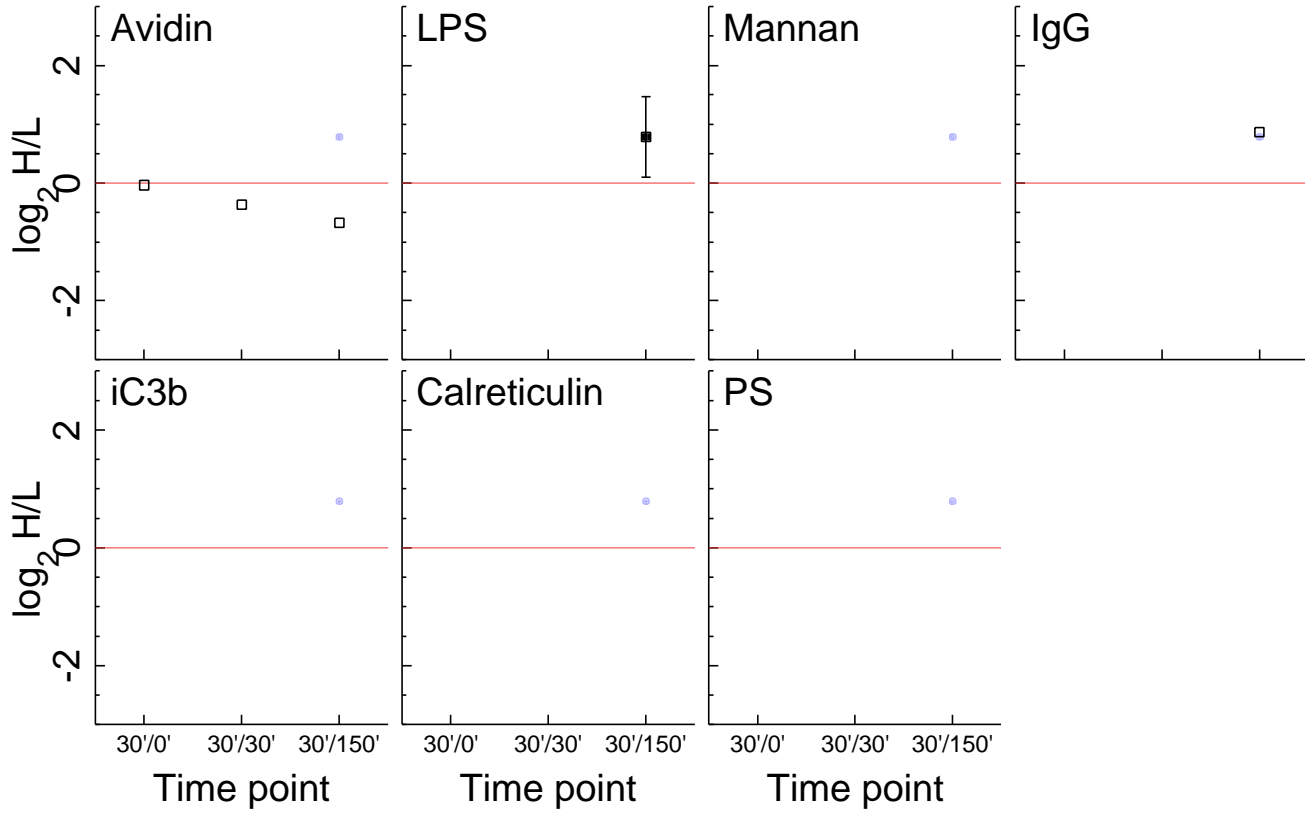



### eif2s1 (Q6ZWX6)

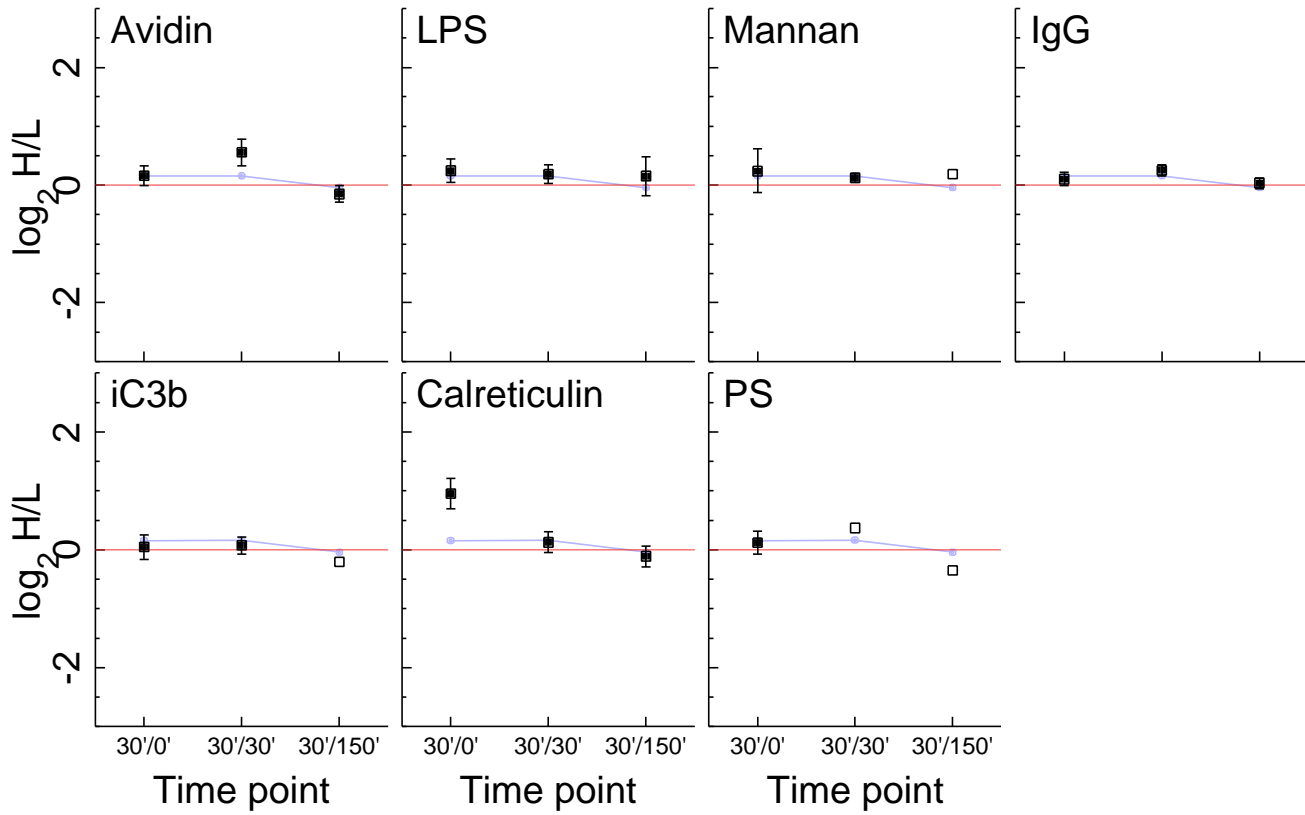

eif2s3x (Q9Z0N1)

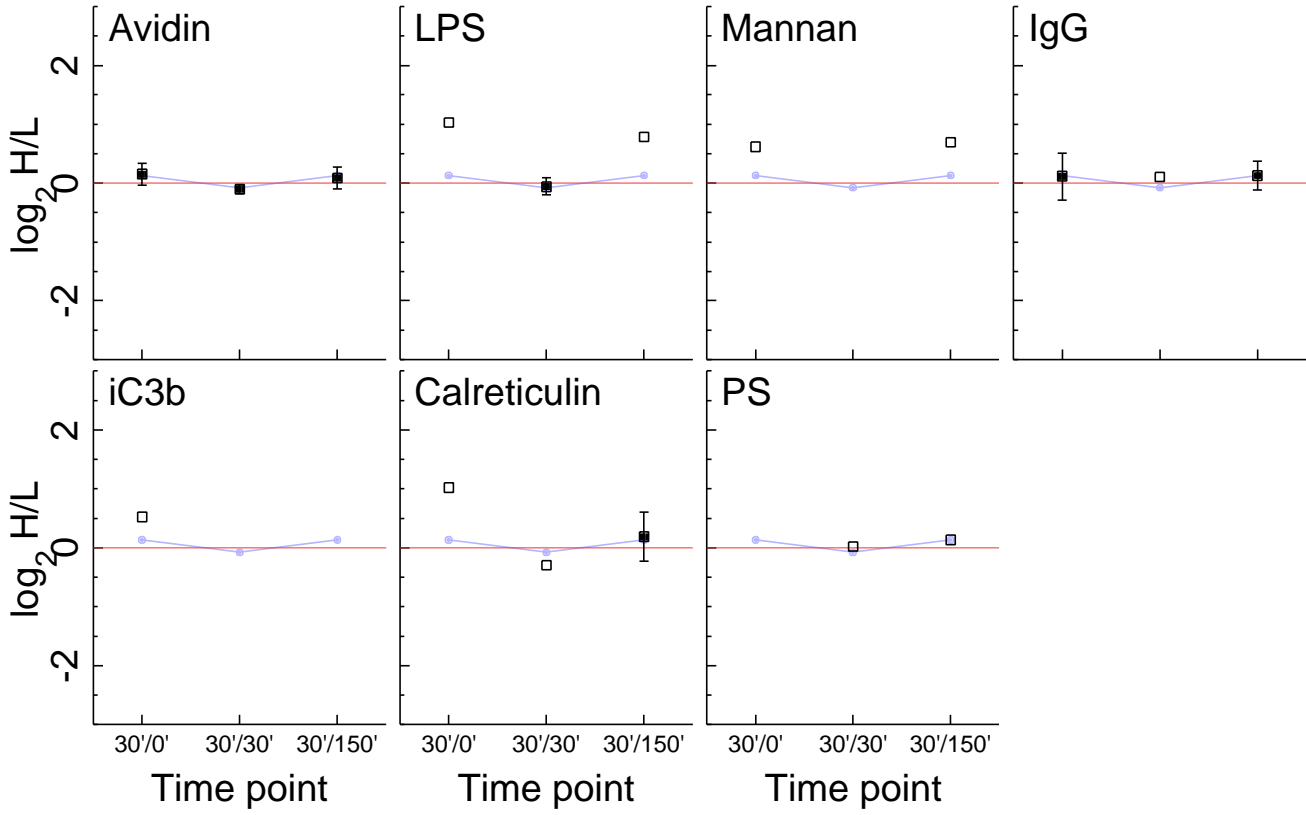

eif3d (O70194)

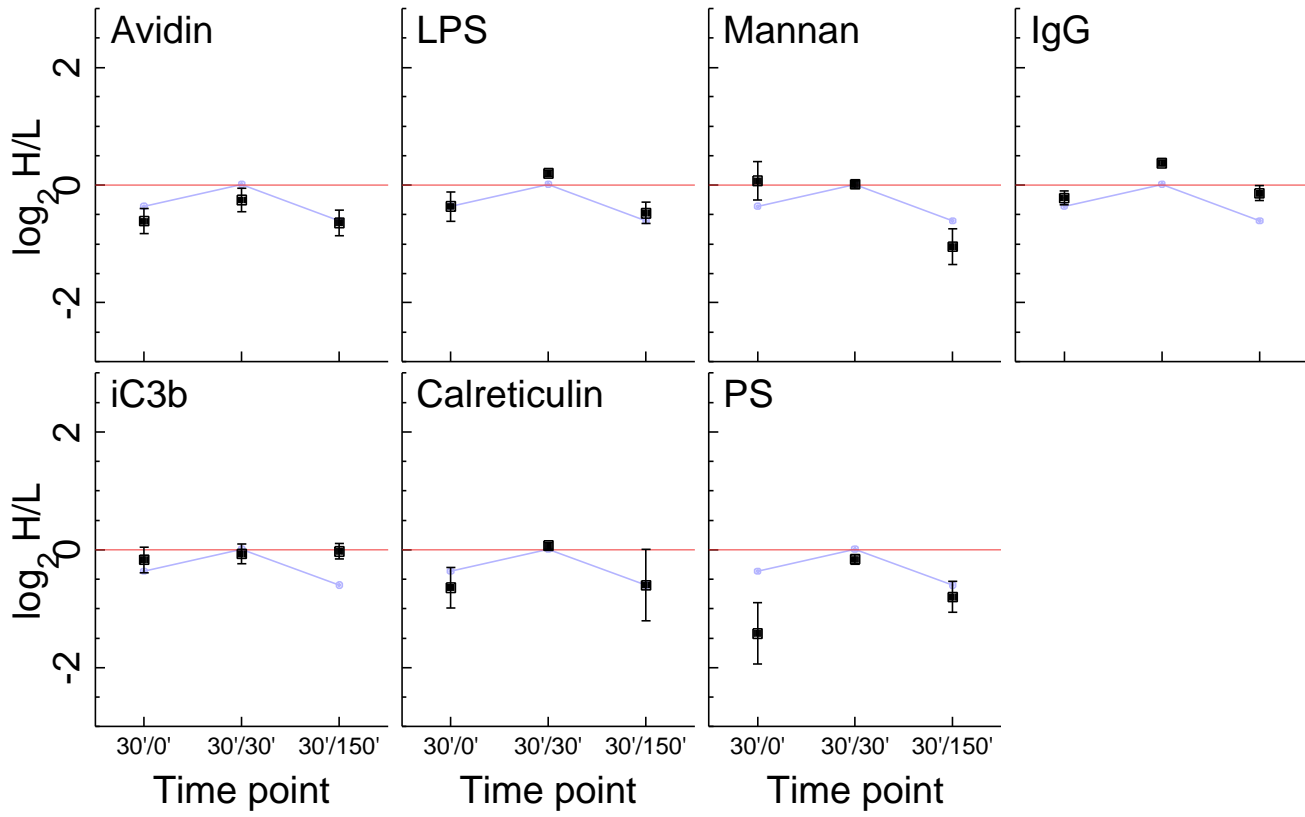

### eif3l (Q8QZY1)

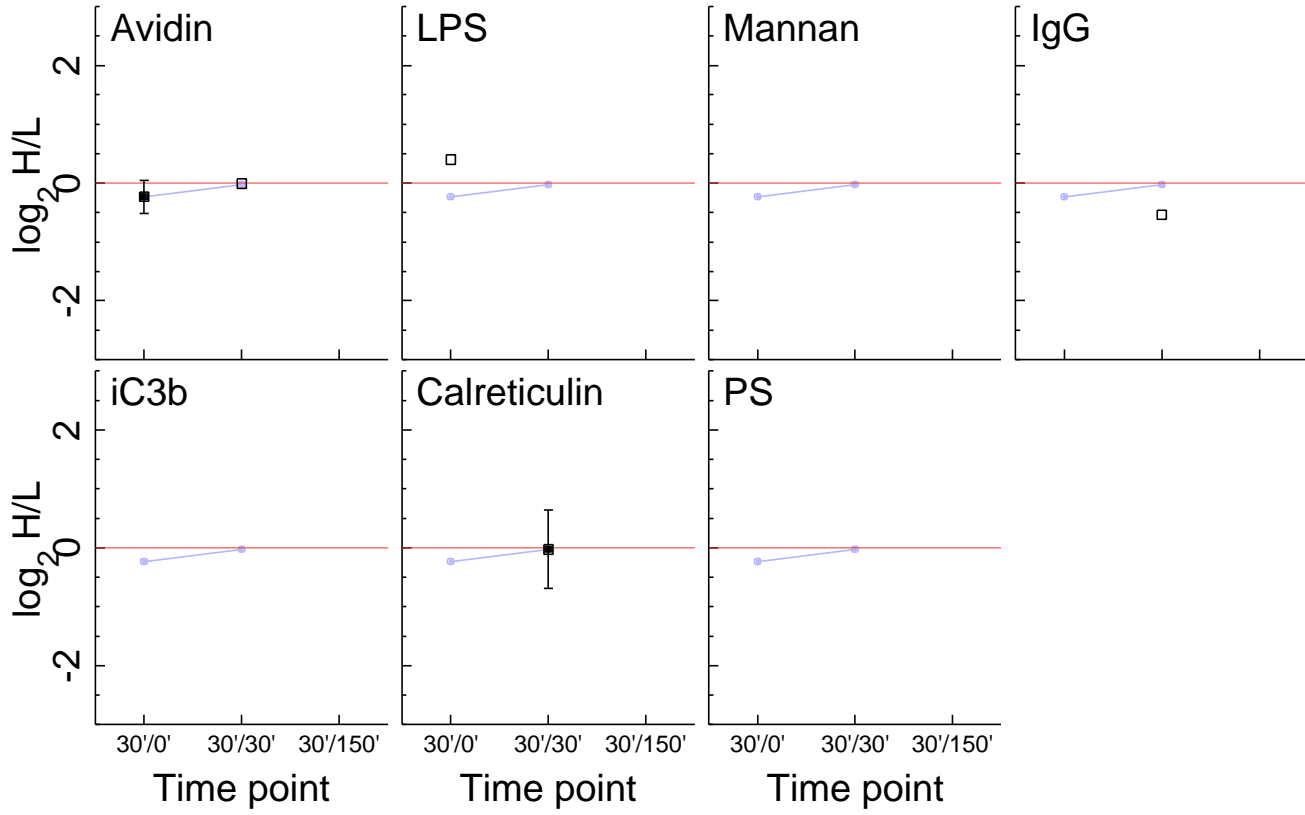

### eif4a1 (P60843)

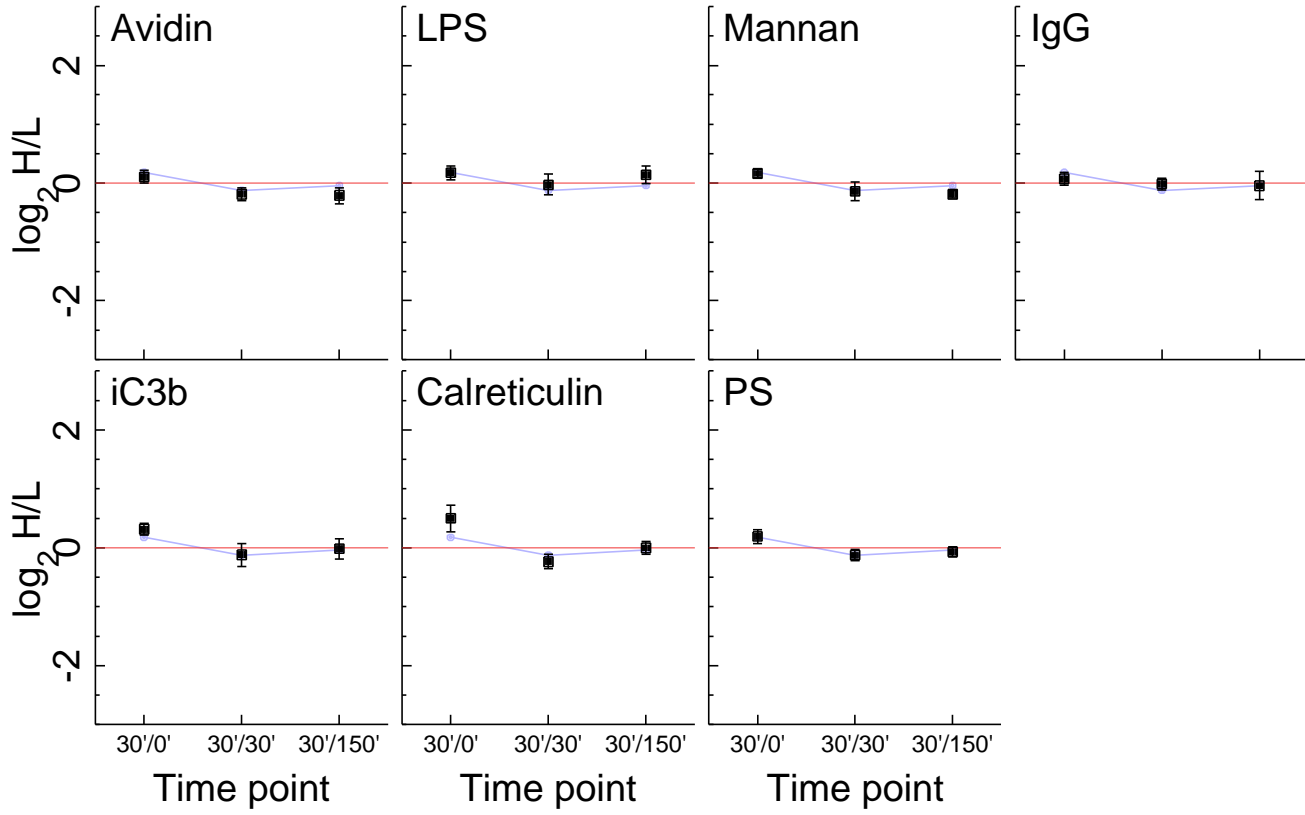

eif4e2 (D3YUV9)

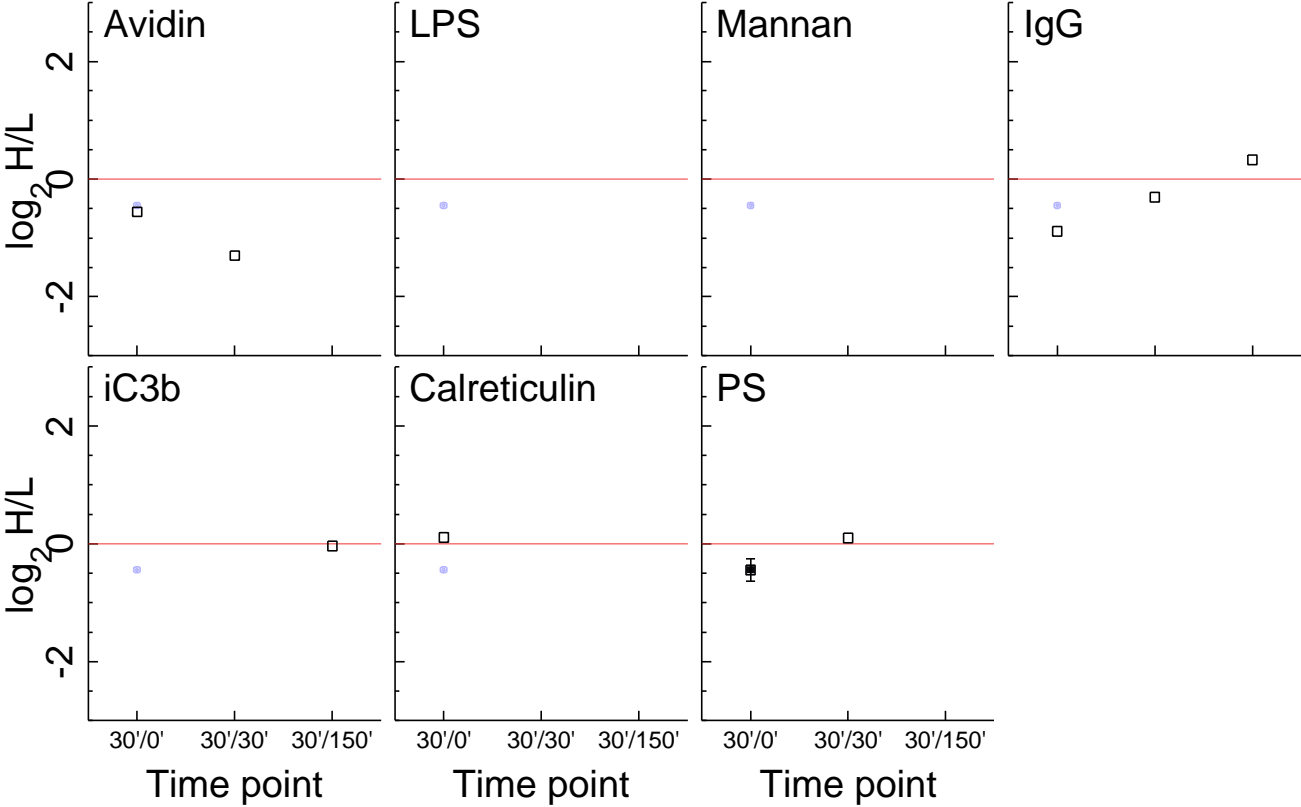

### eif4enif1 (Q9EST3)

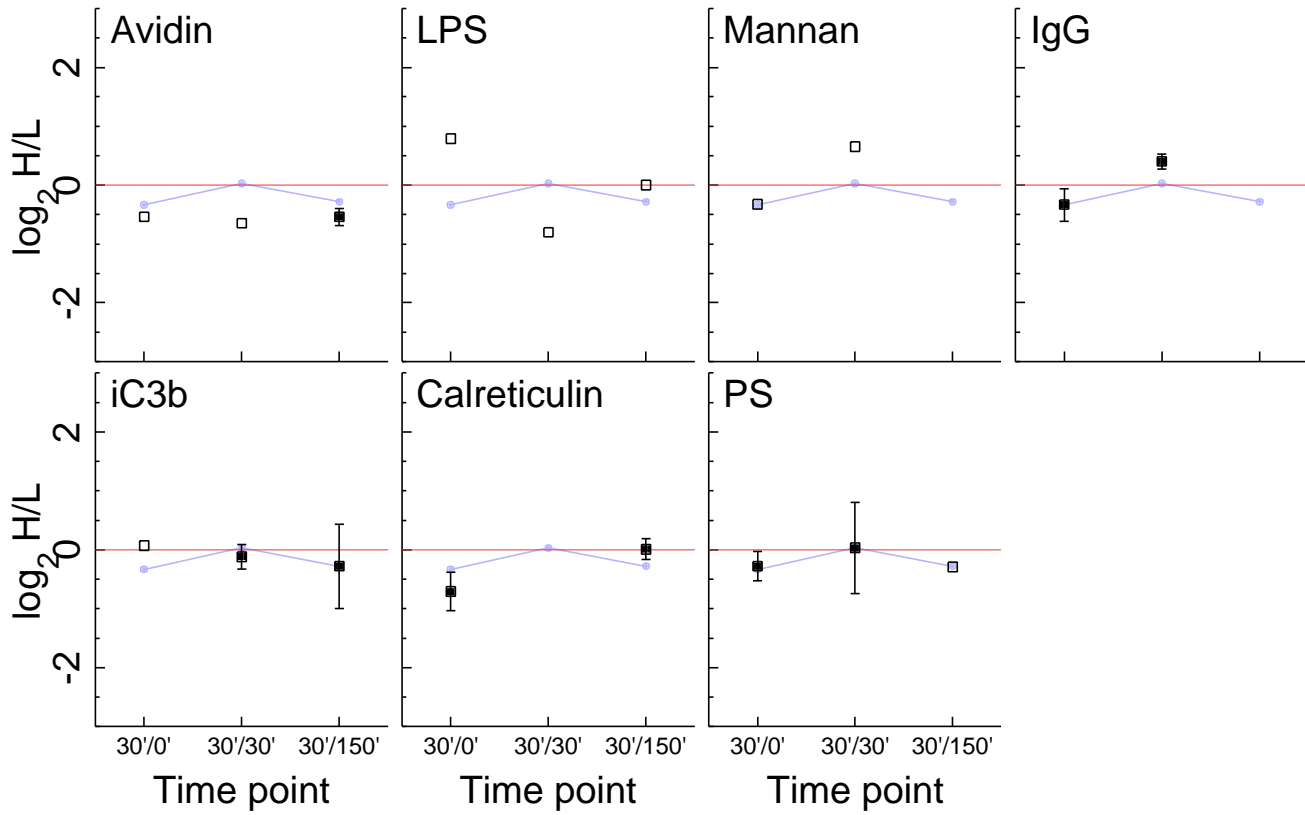

### eif4e (P63073)

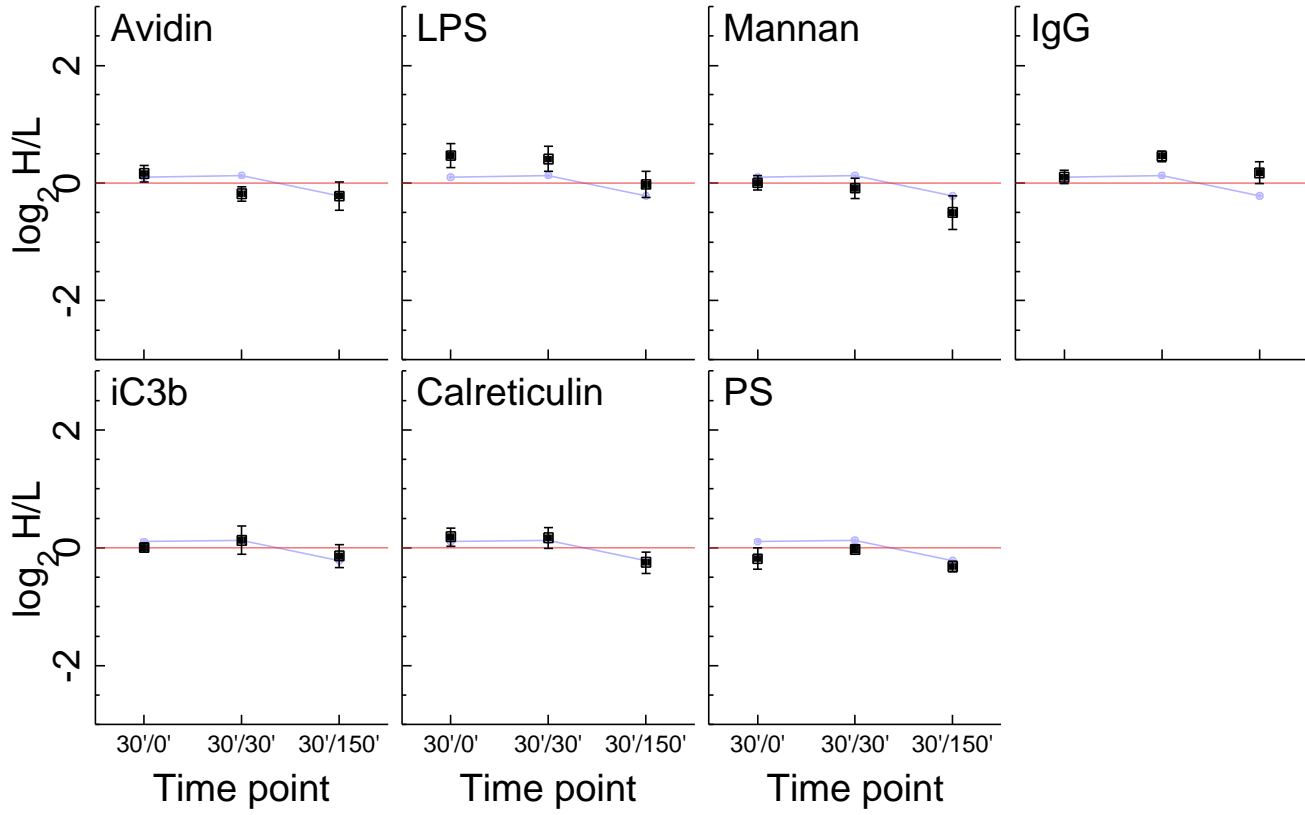



eif4g1 (Q6NZJ6)

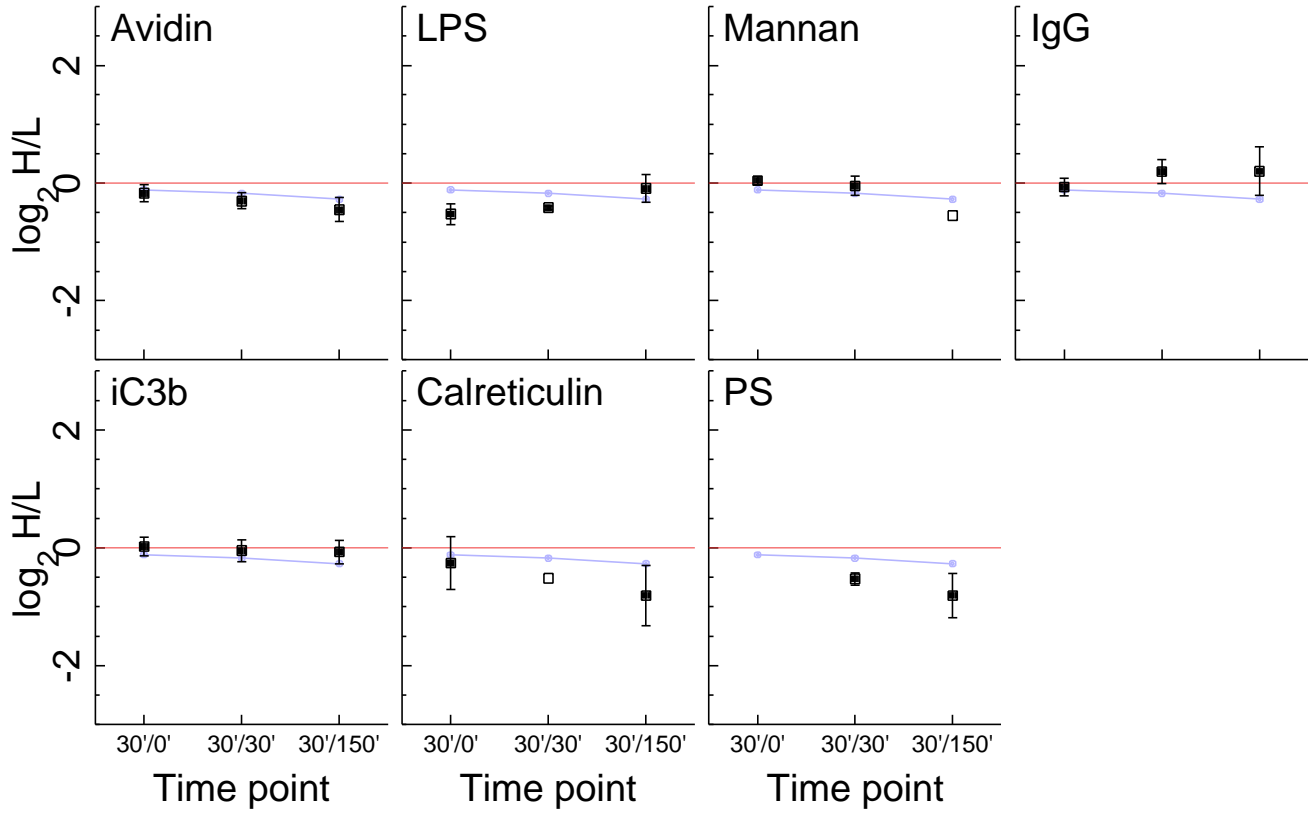

eif4g2 (G3XA17)

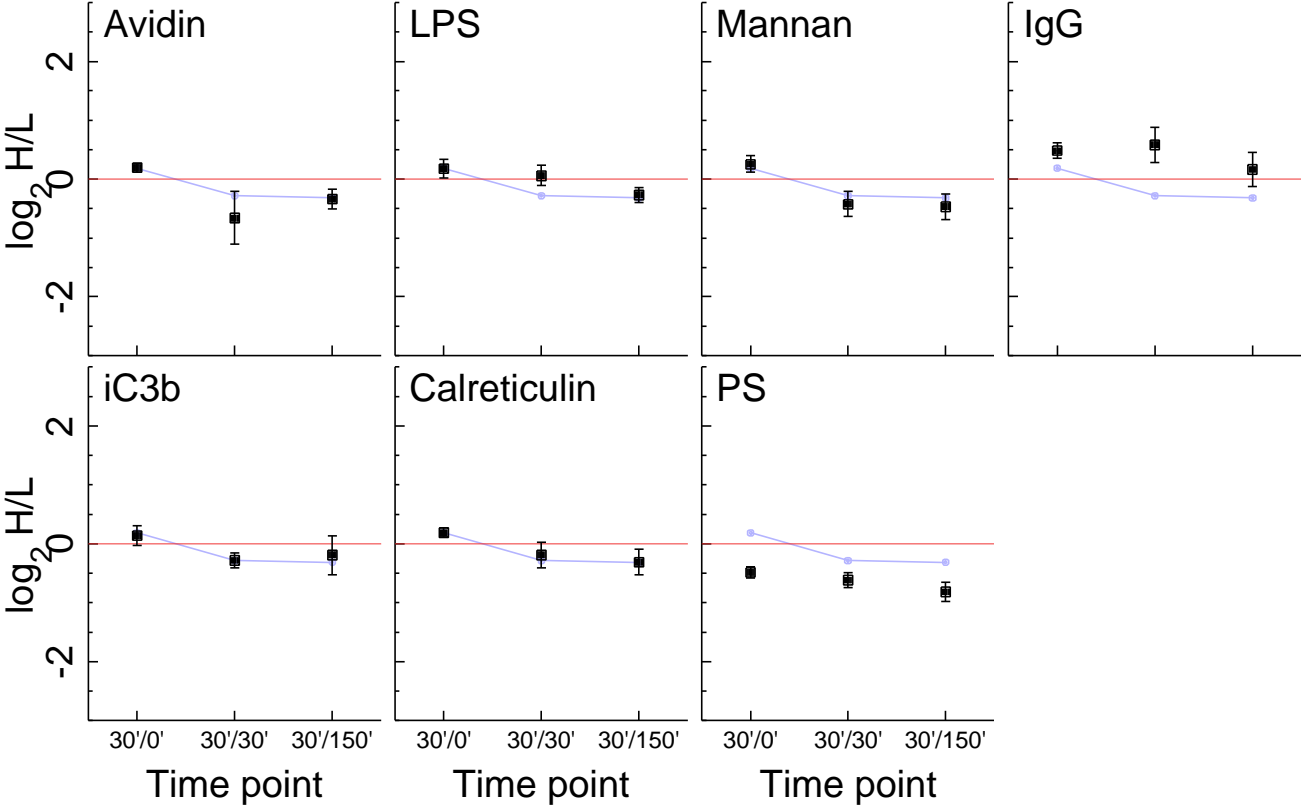

eif4h (Q9WUK2)

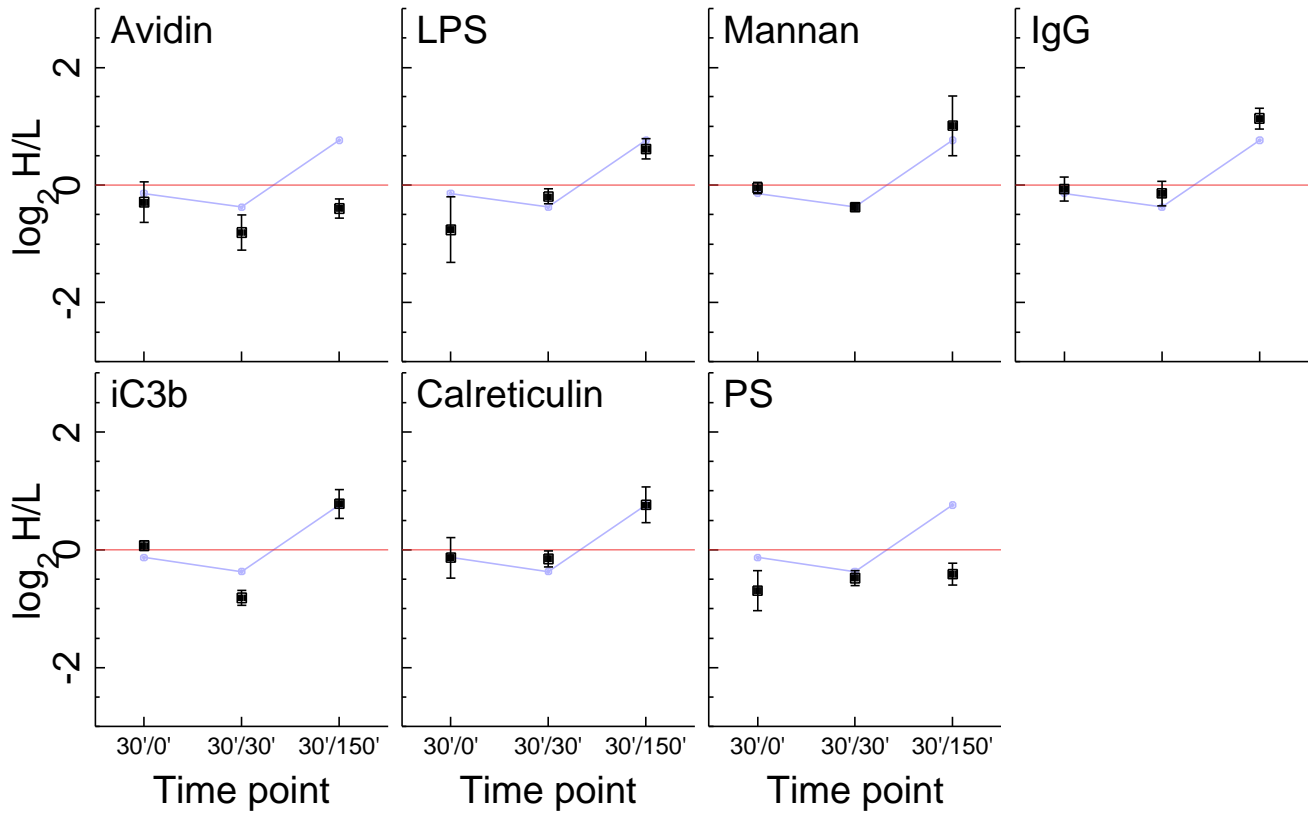

eif5a (P63242)

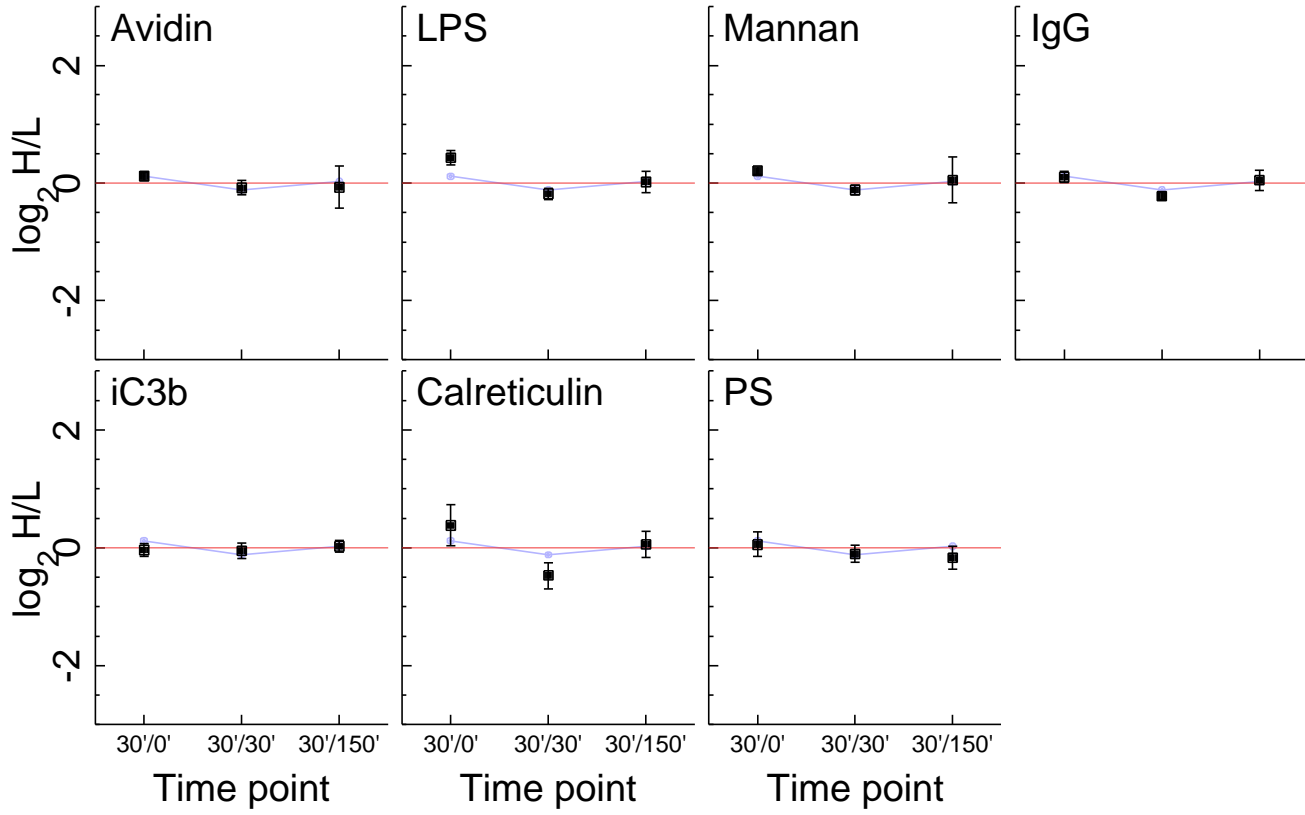

### eif6 (O55135)

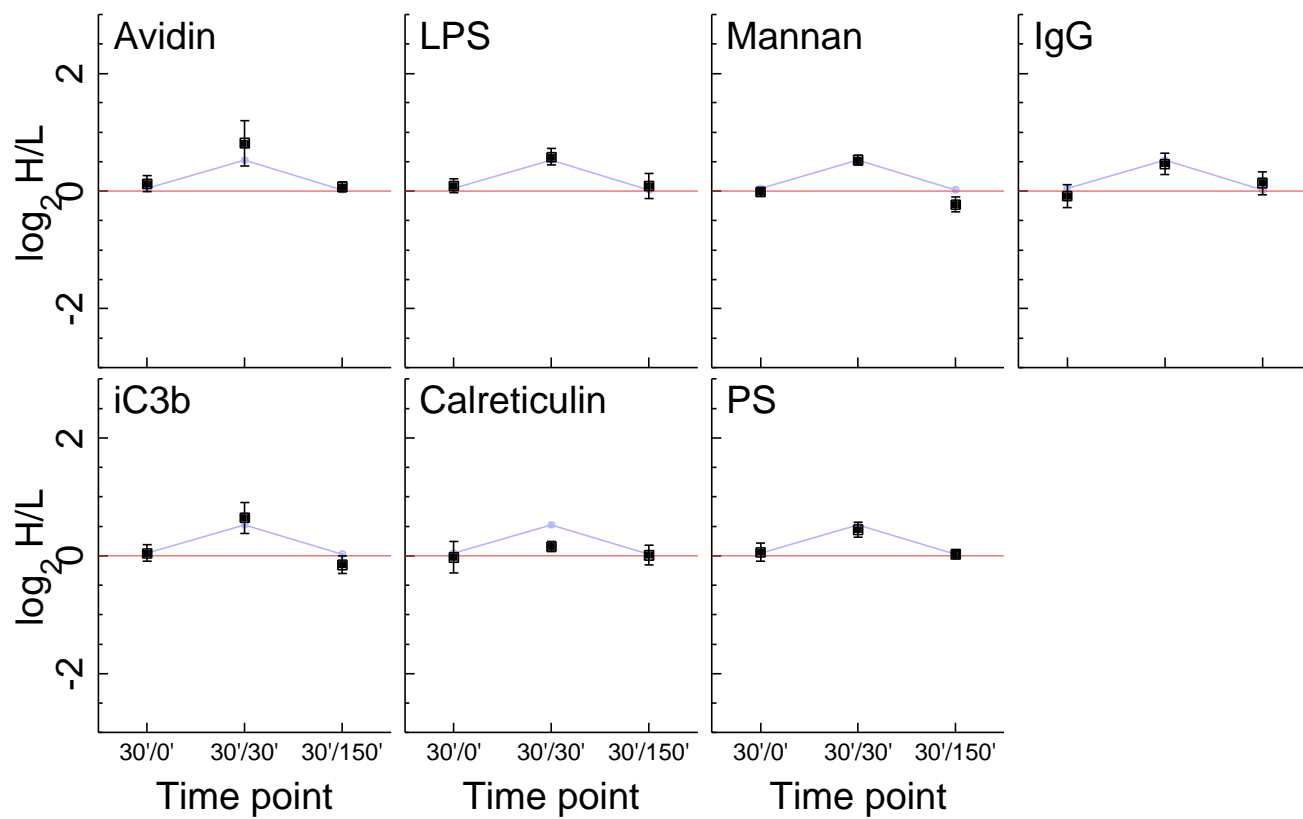

### elavl1 (P70372)

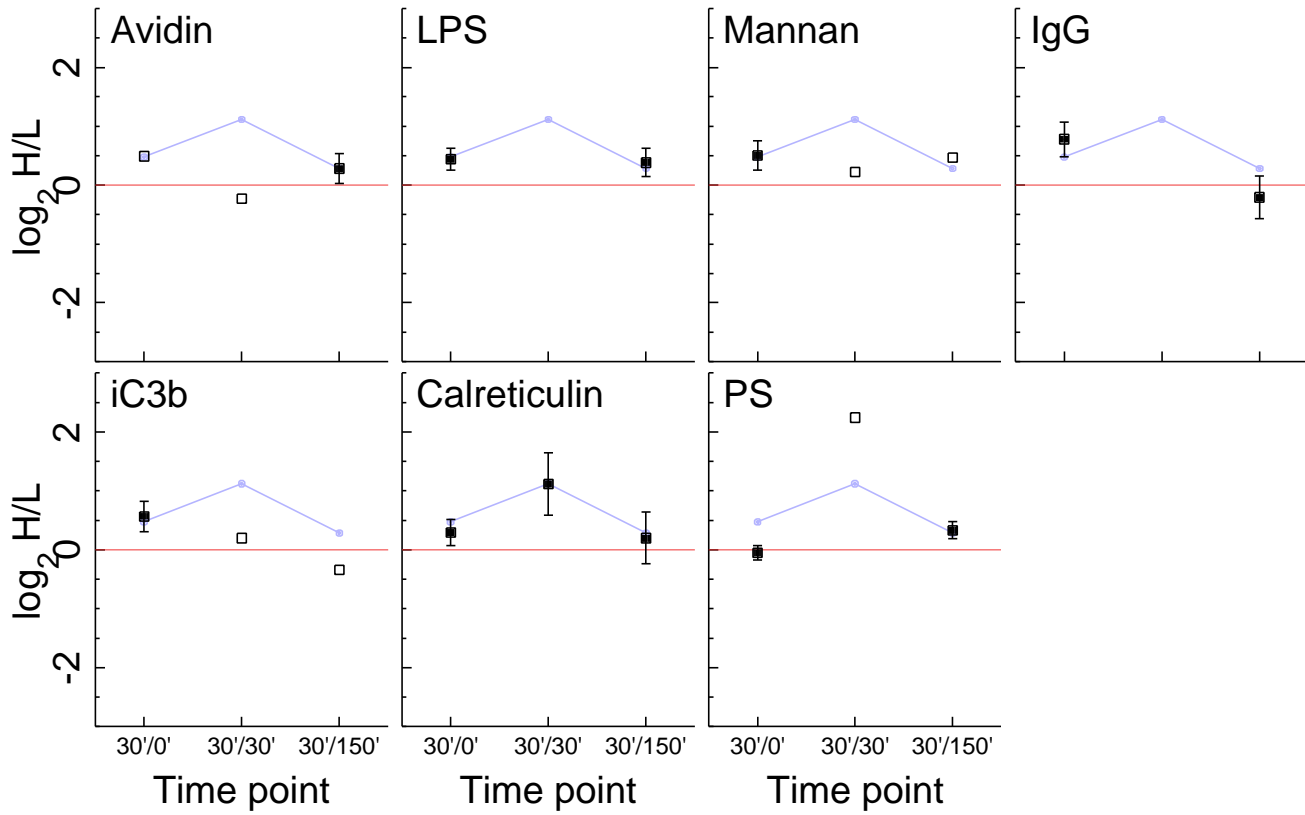

elmo1 (Q8BPU7)

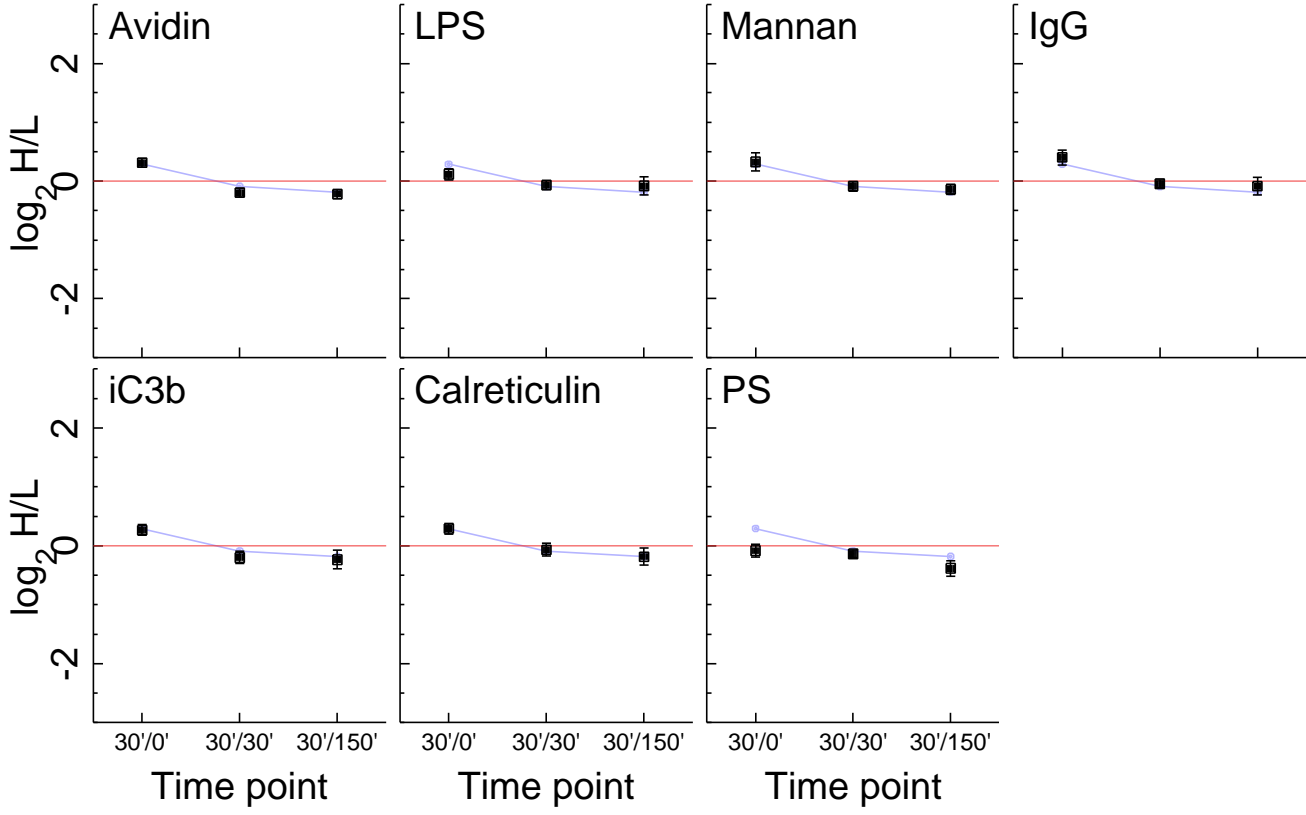

elmo2 (Q8BHL5)

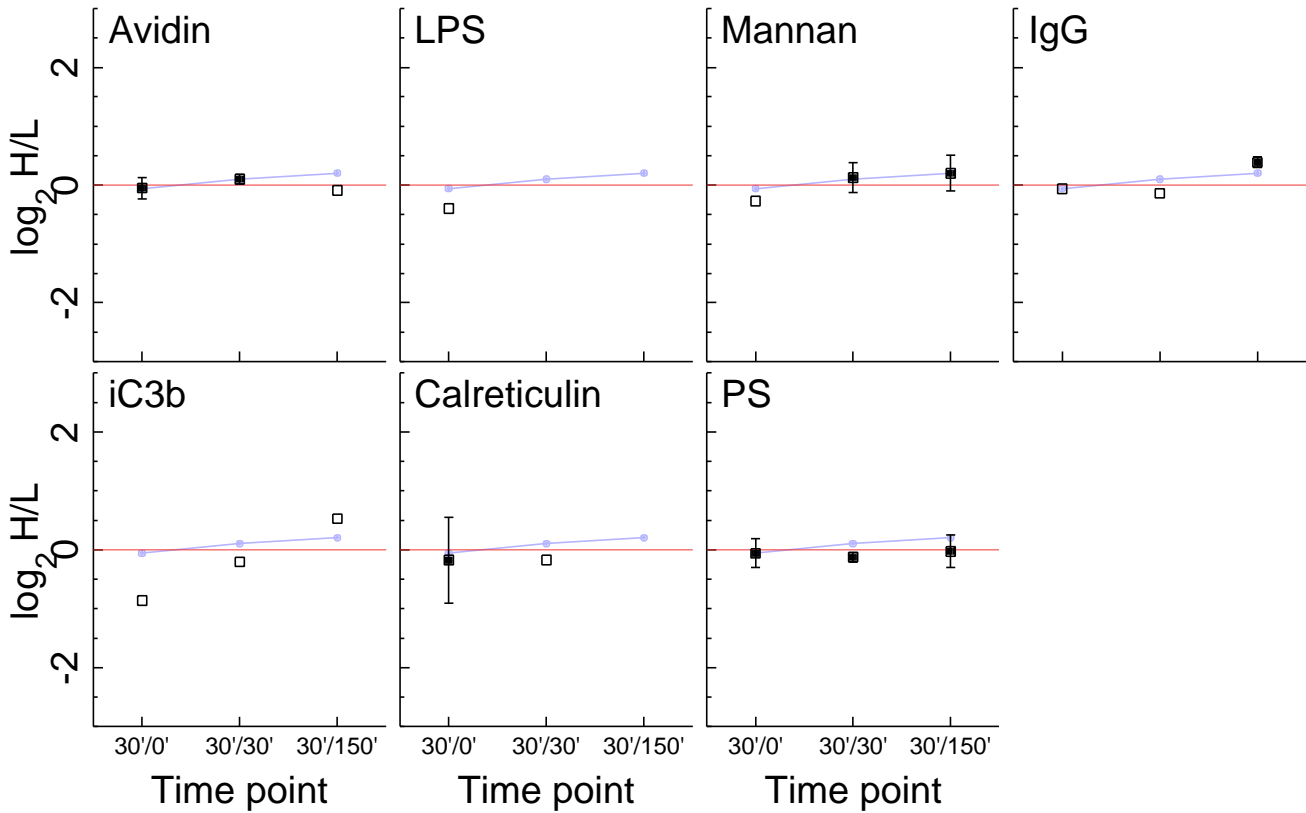



### elov11 (Q9JLJ5)

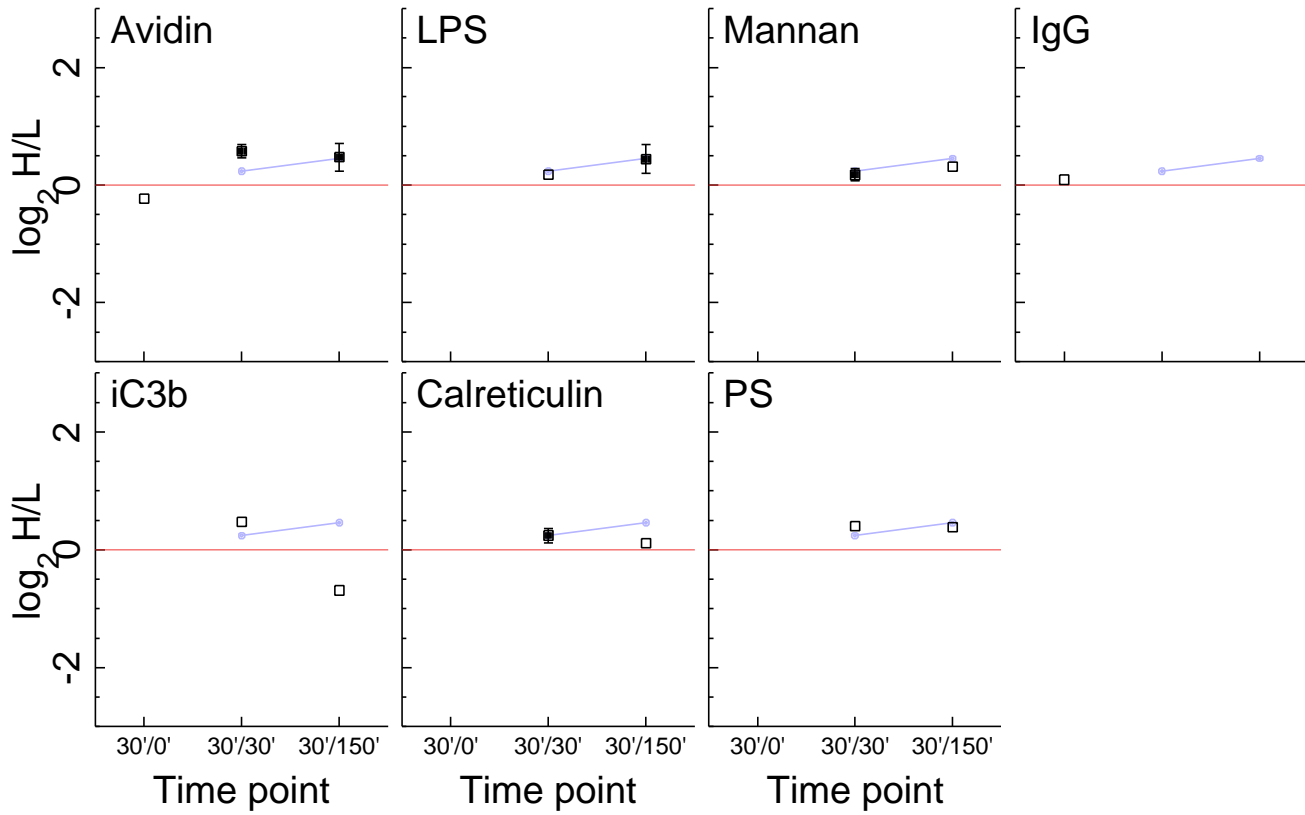

emb (P21995)

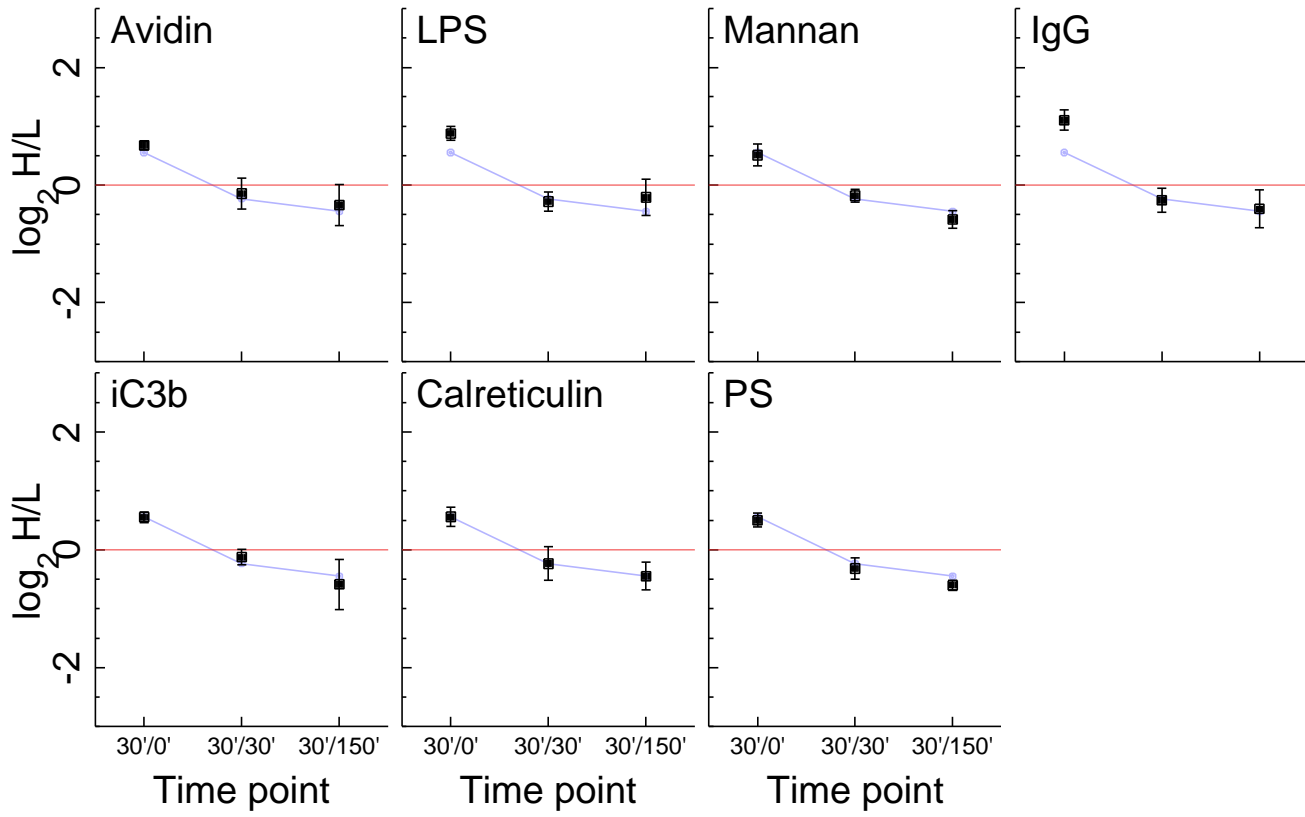

emd (O08579)

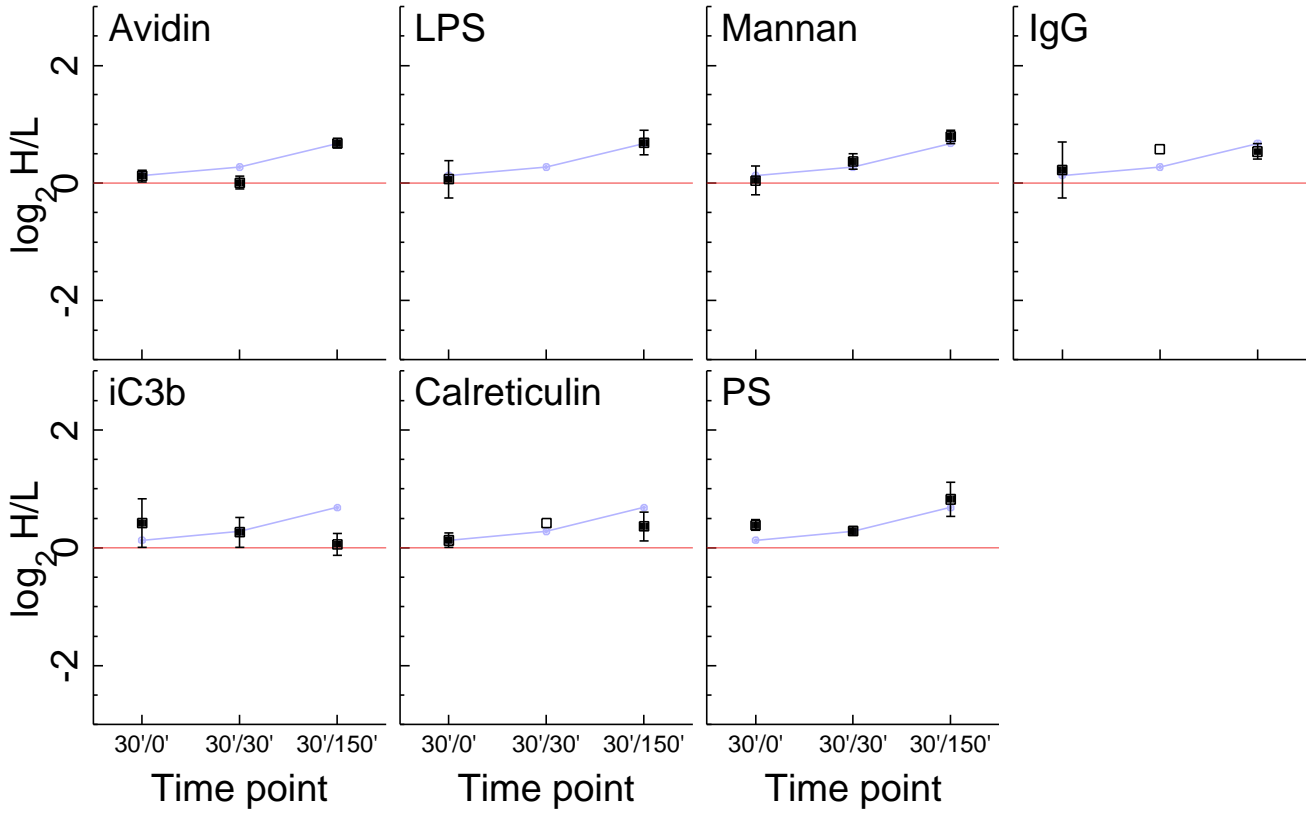

### emp2 (O88662)

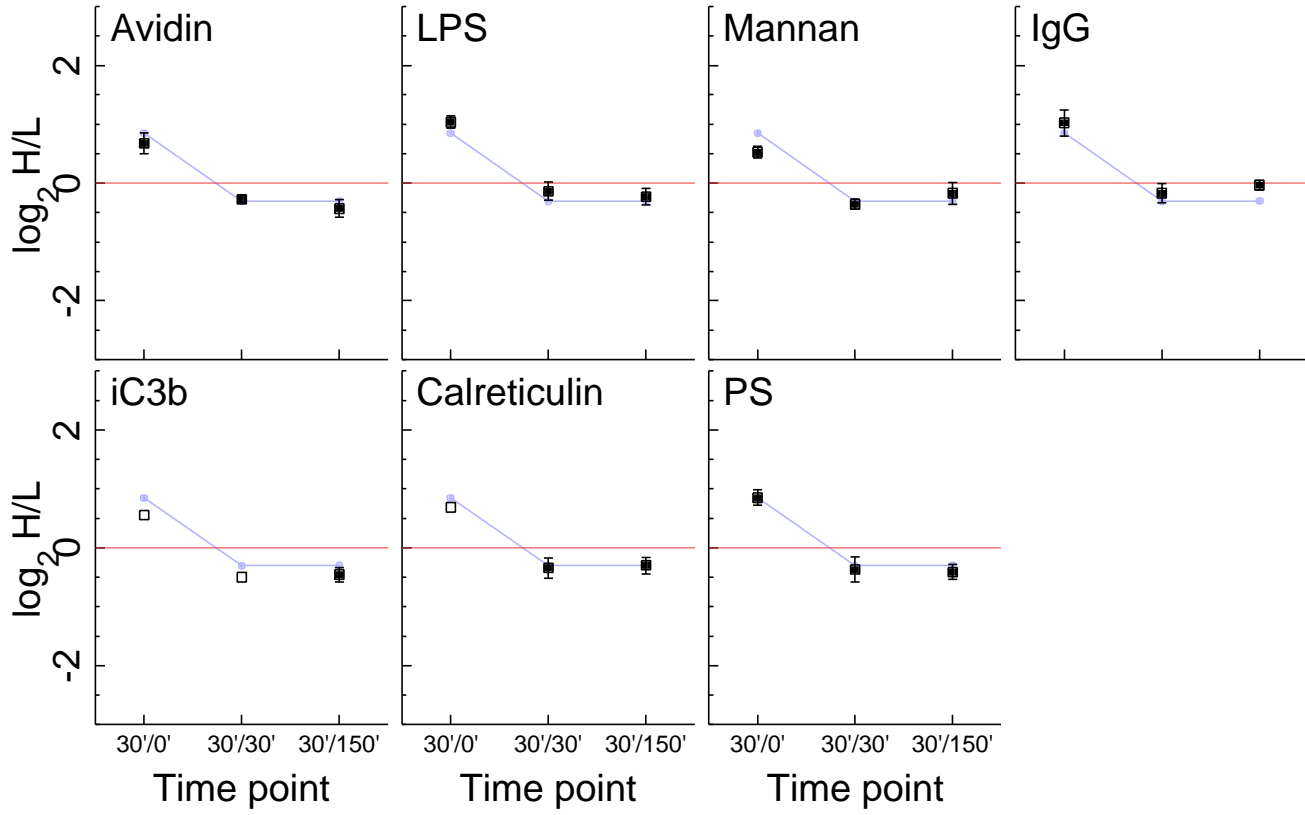

### emr1 (Q61549)

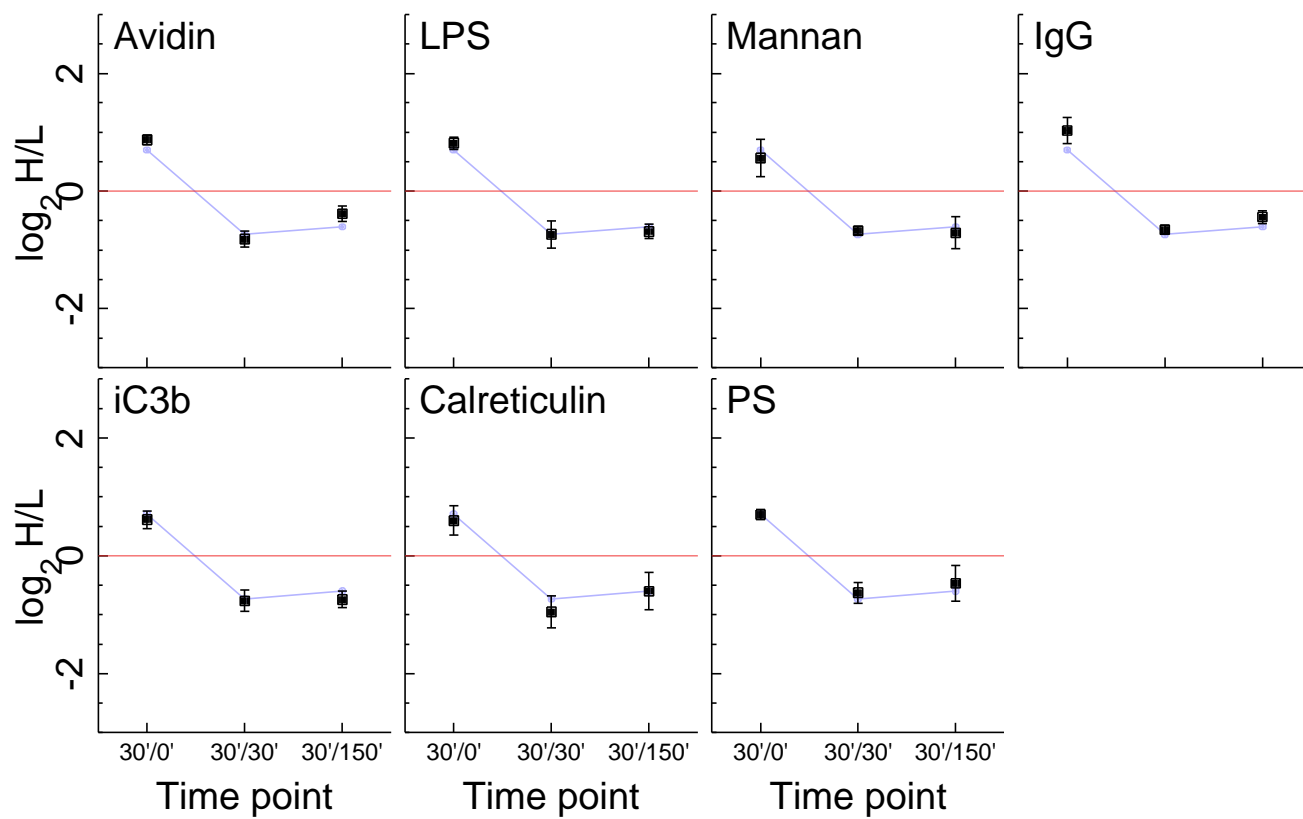

### endod1 (Q8C522)

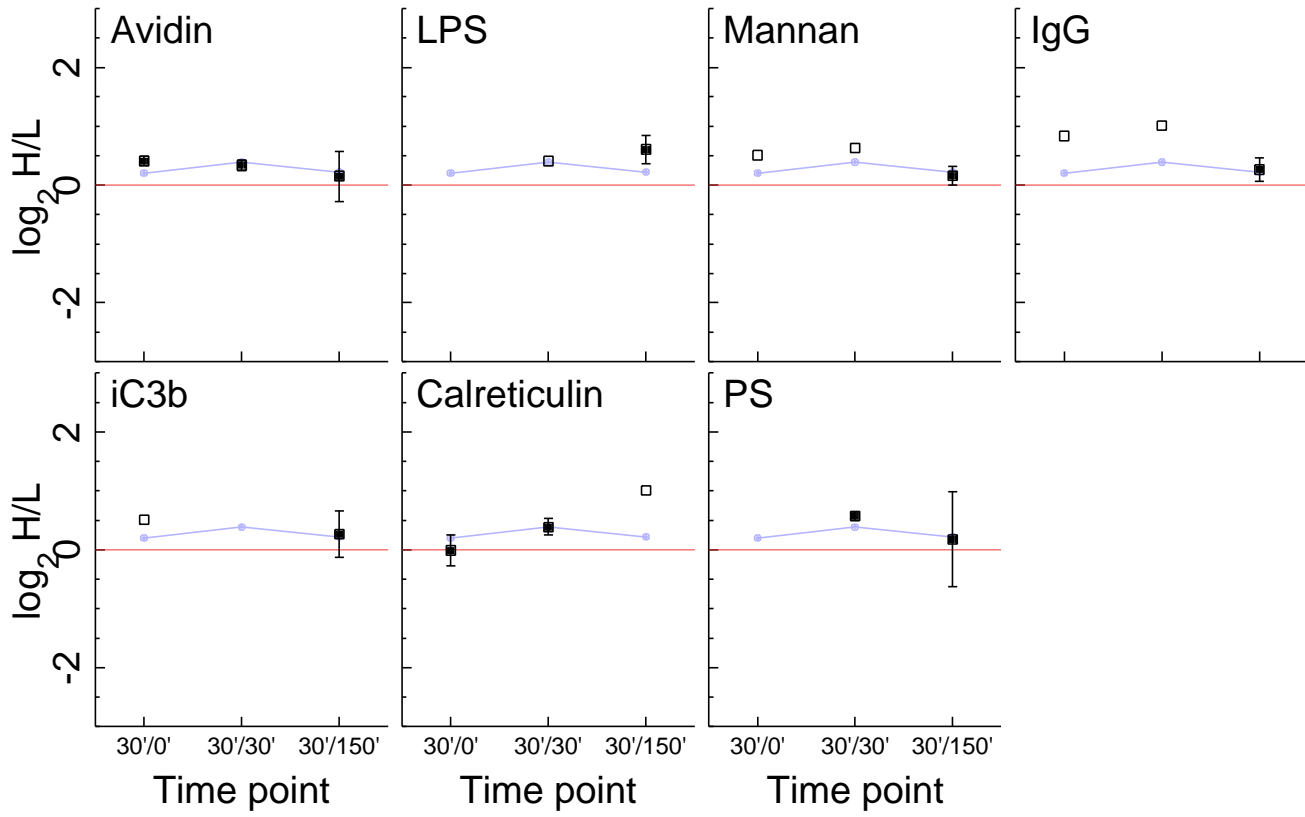

### eno1 (P17182)

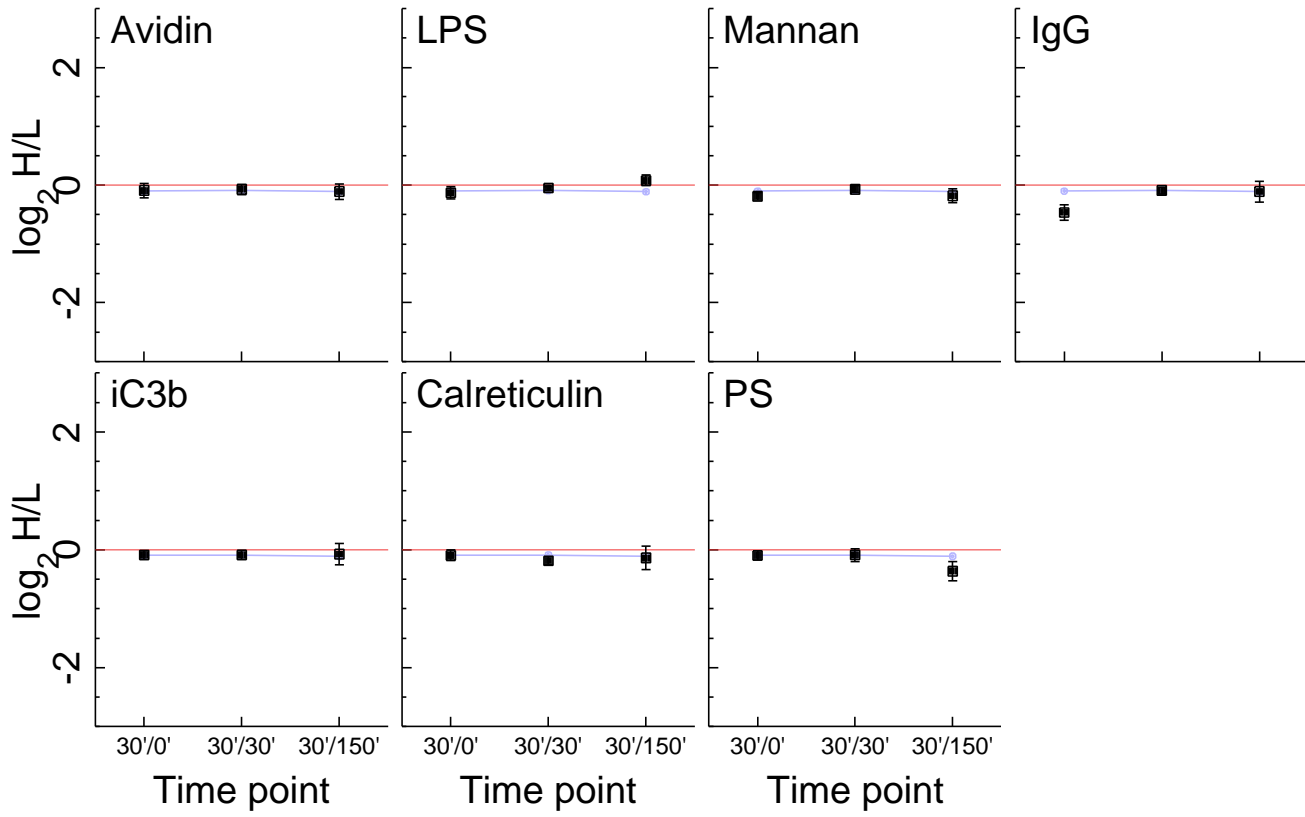

ensa (P60840)

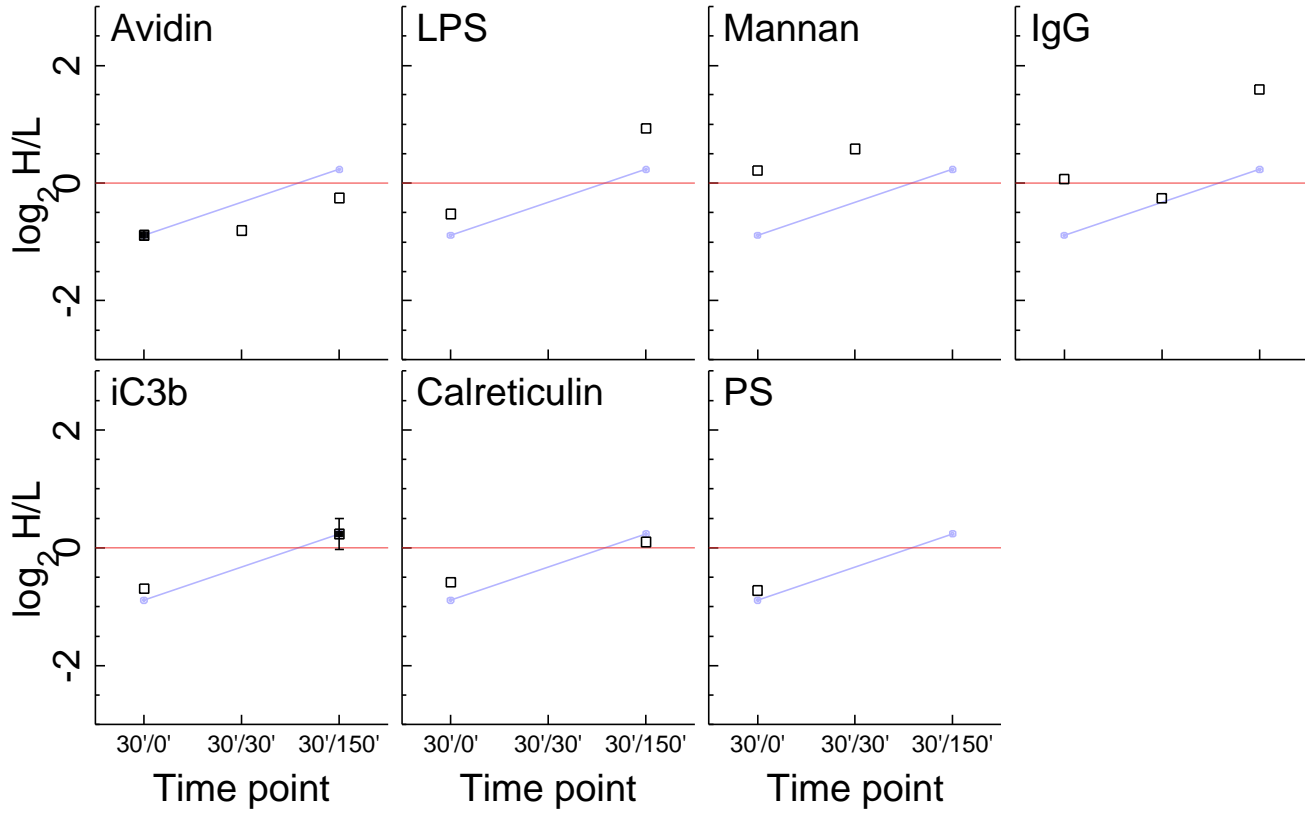



entpd1 (Q8CDV7)

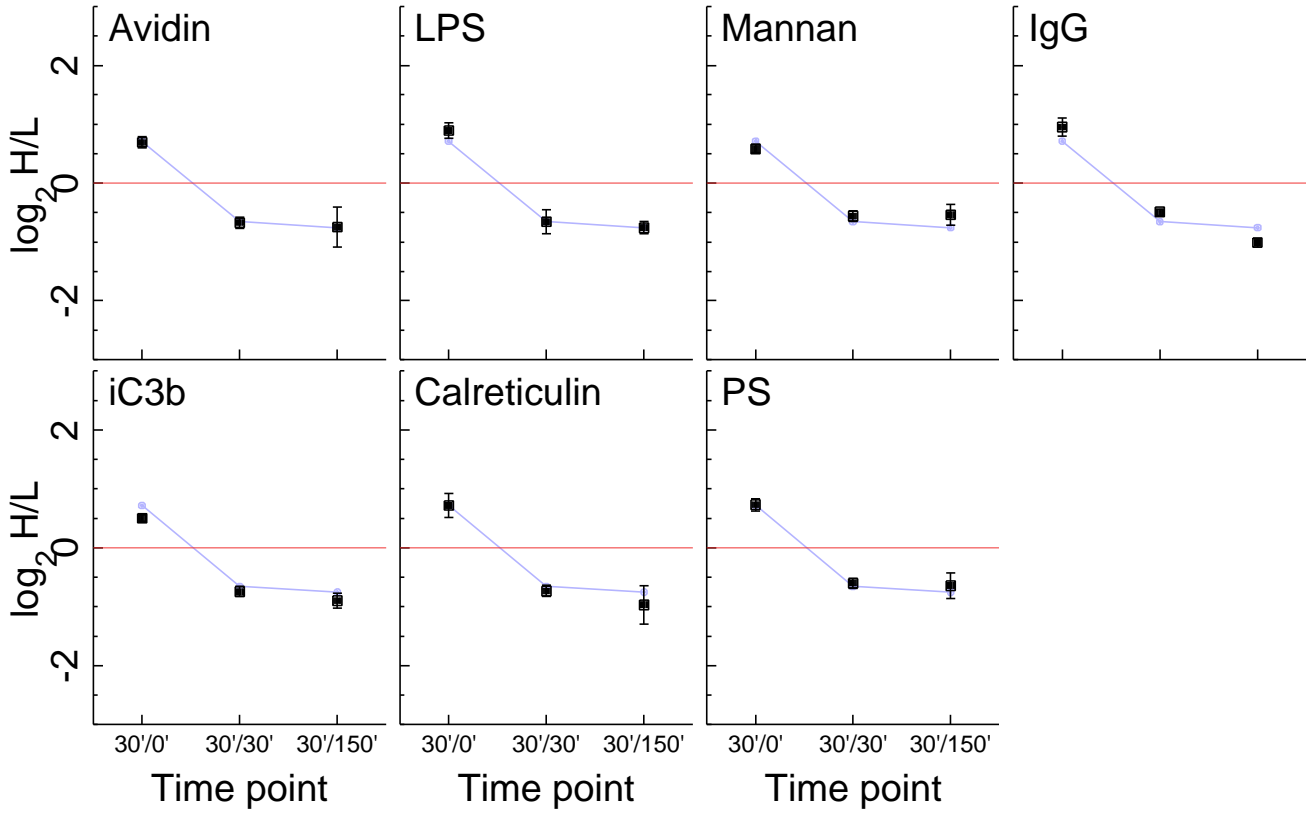

eny2 (Q9JIX0)

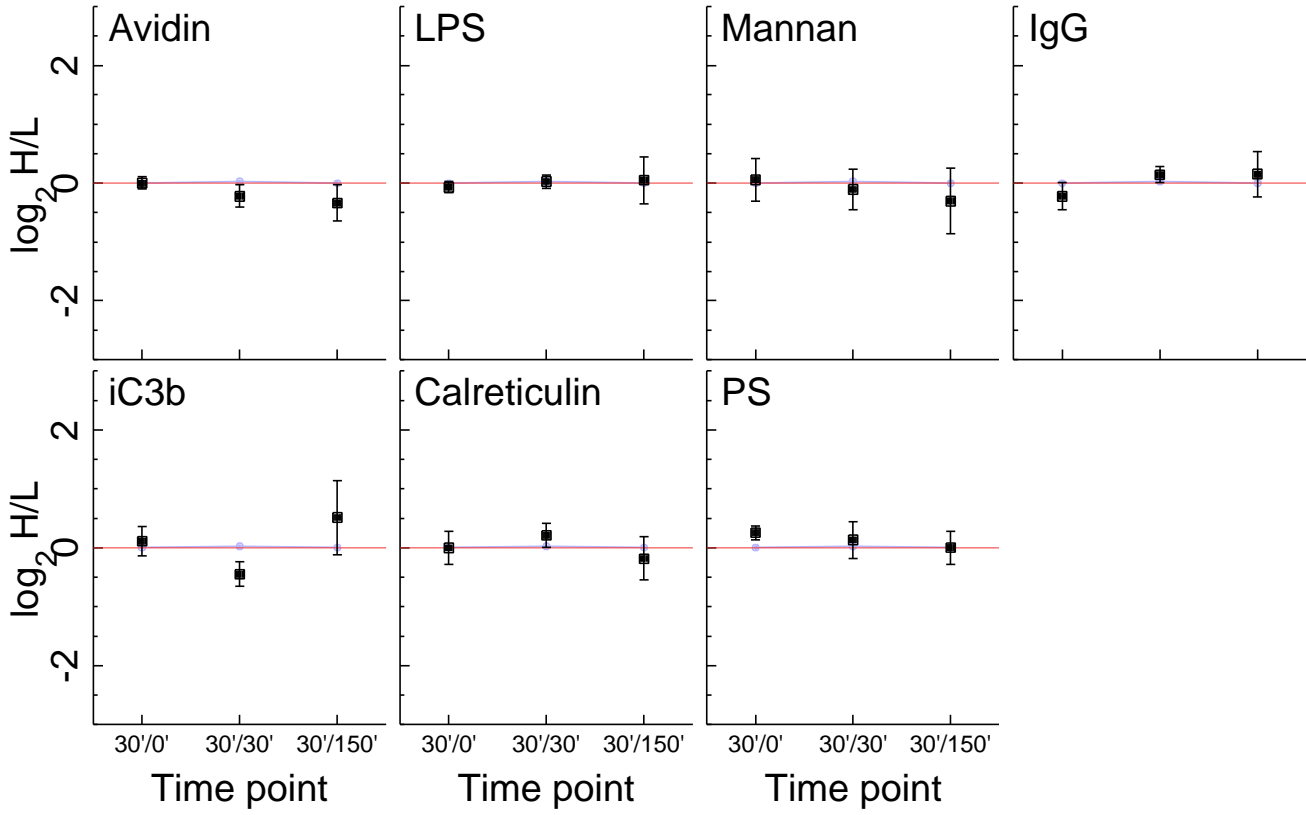

epb4.1 (A2A841)

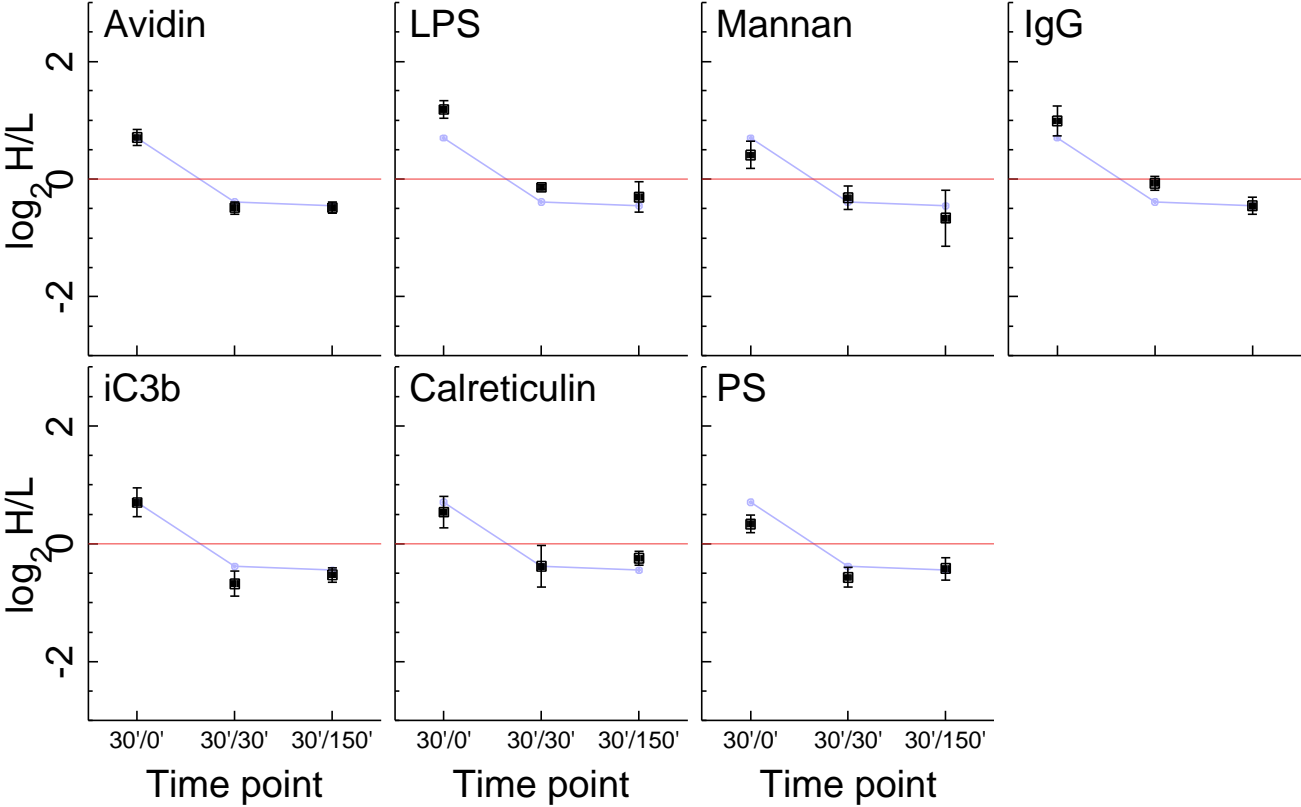

epb4.111 (A2AUK5)

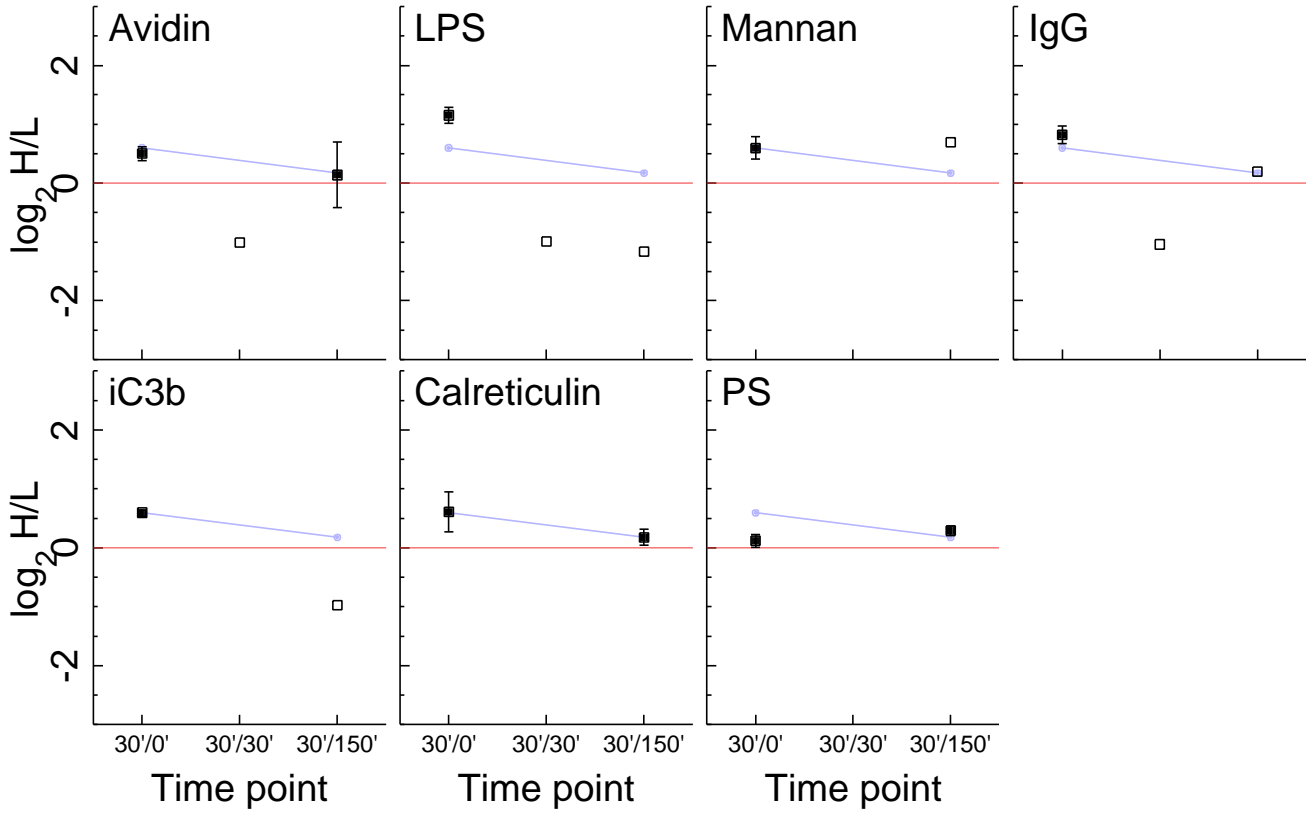

epb4112 (O70318)

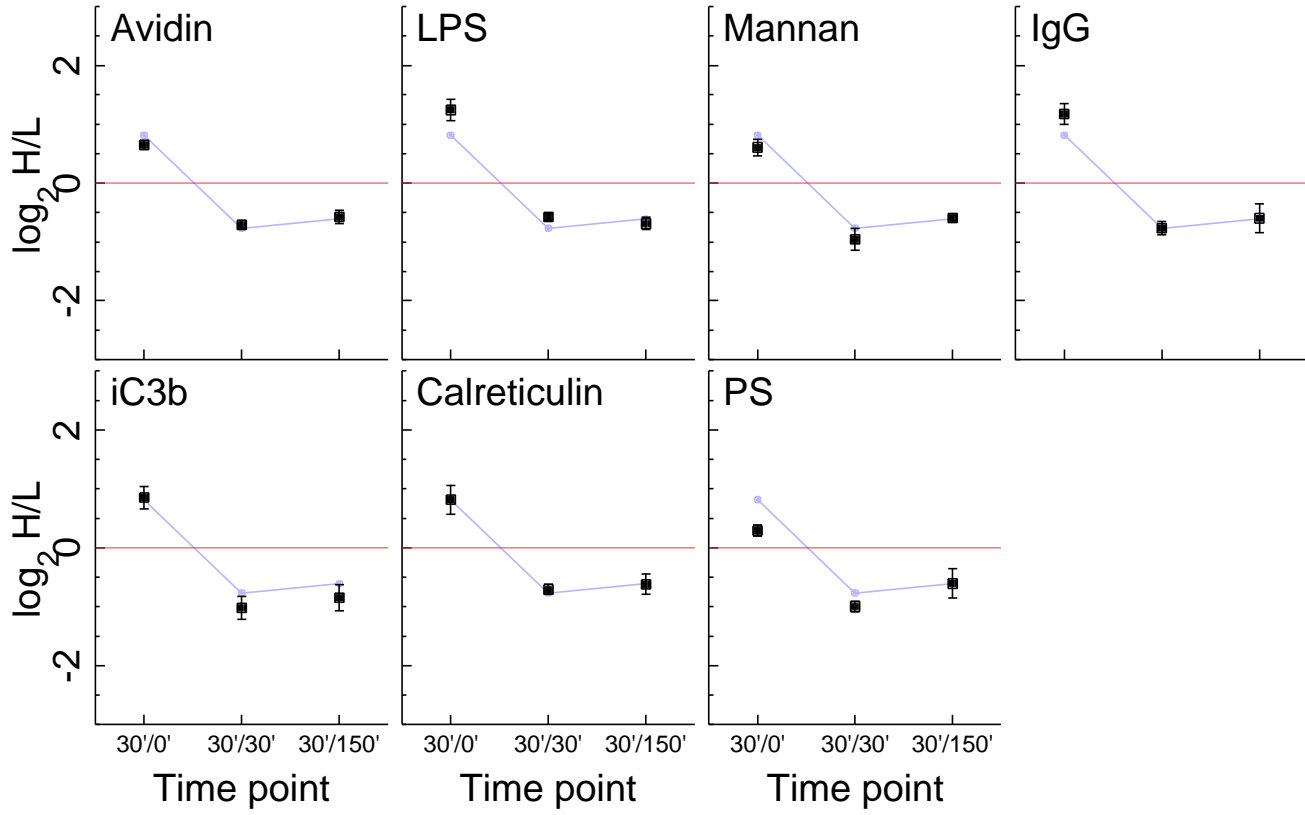

### epdr1 (Q99M71)

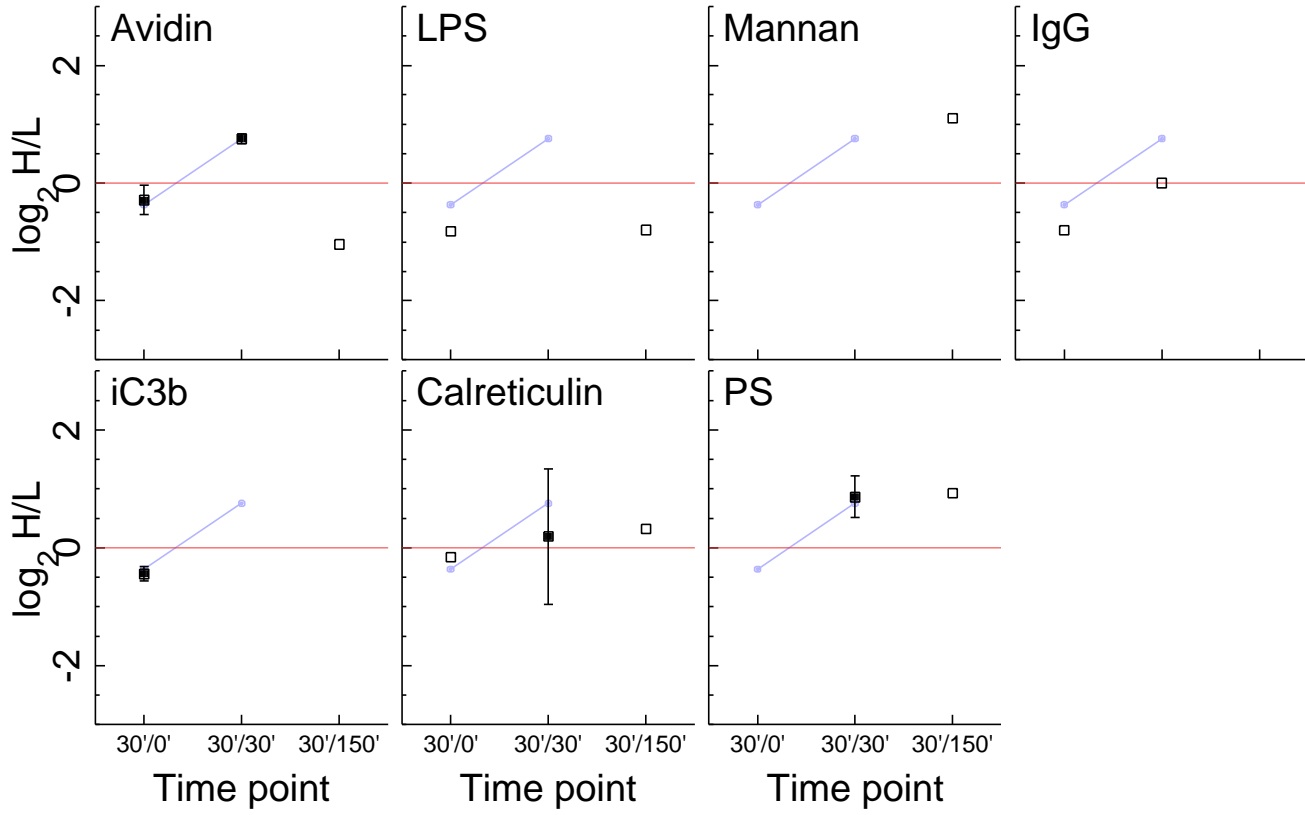

### ephx1 (Q9D379)

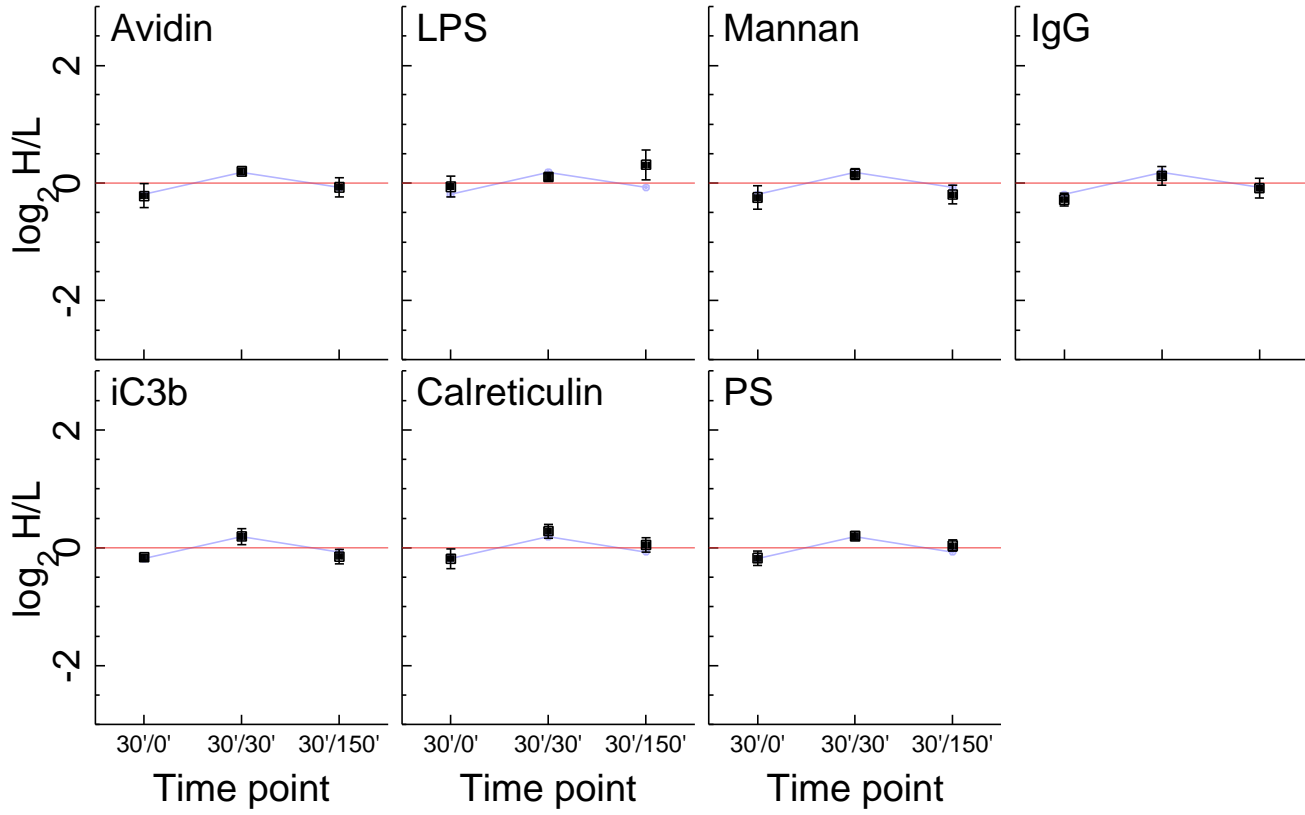

eppk1 (Q8R0W0)

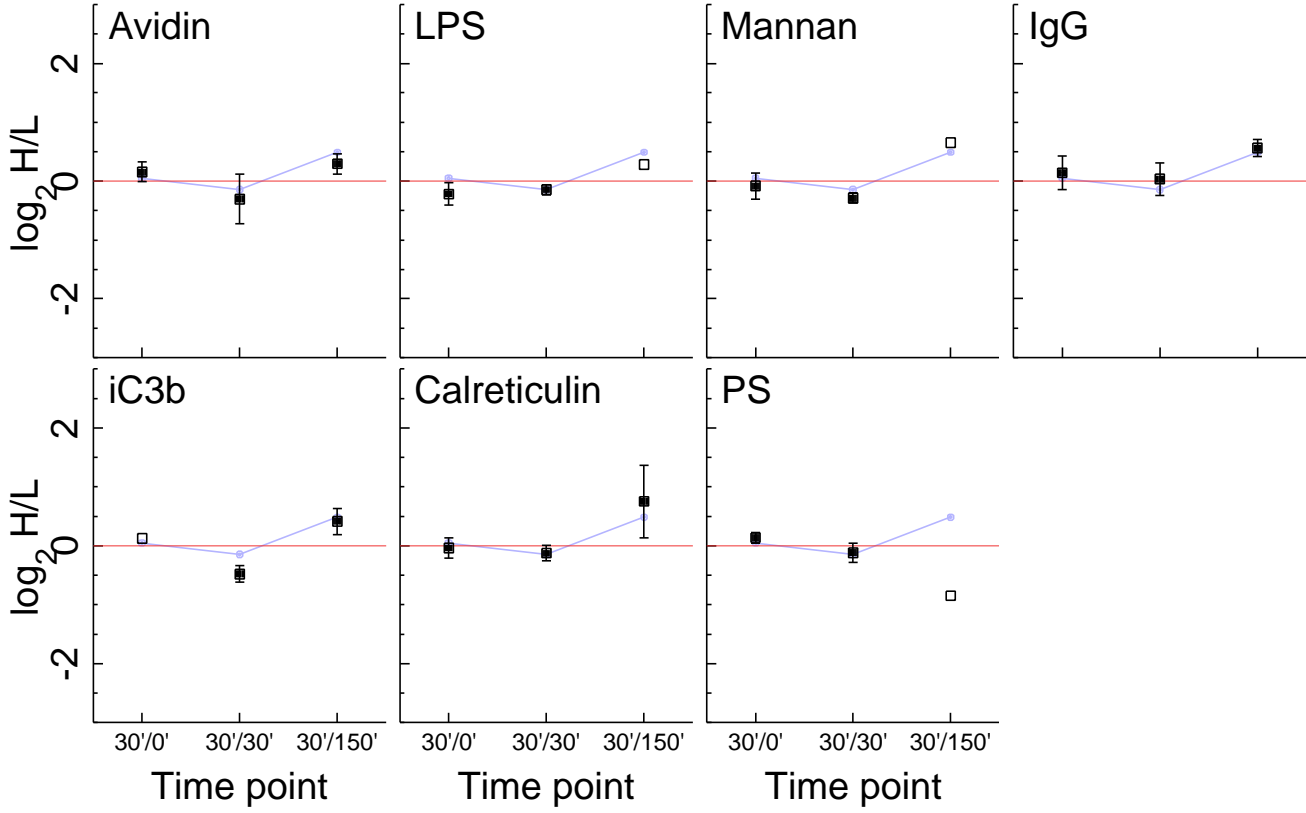



# eps1511 (Q60902)

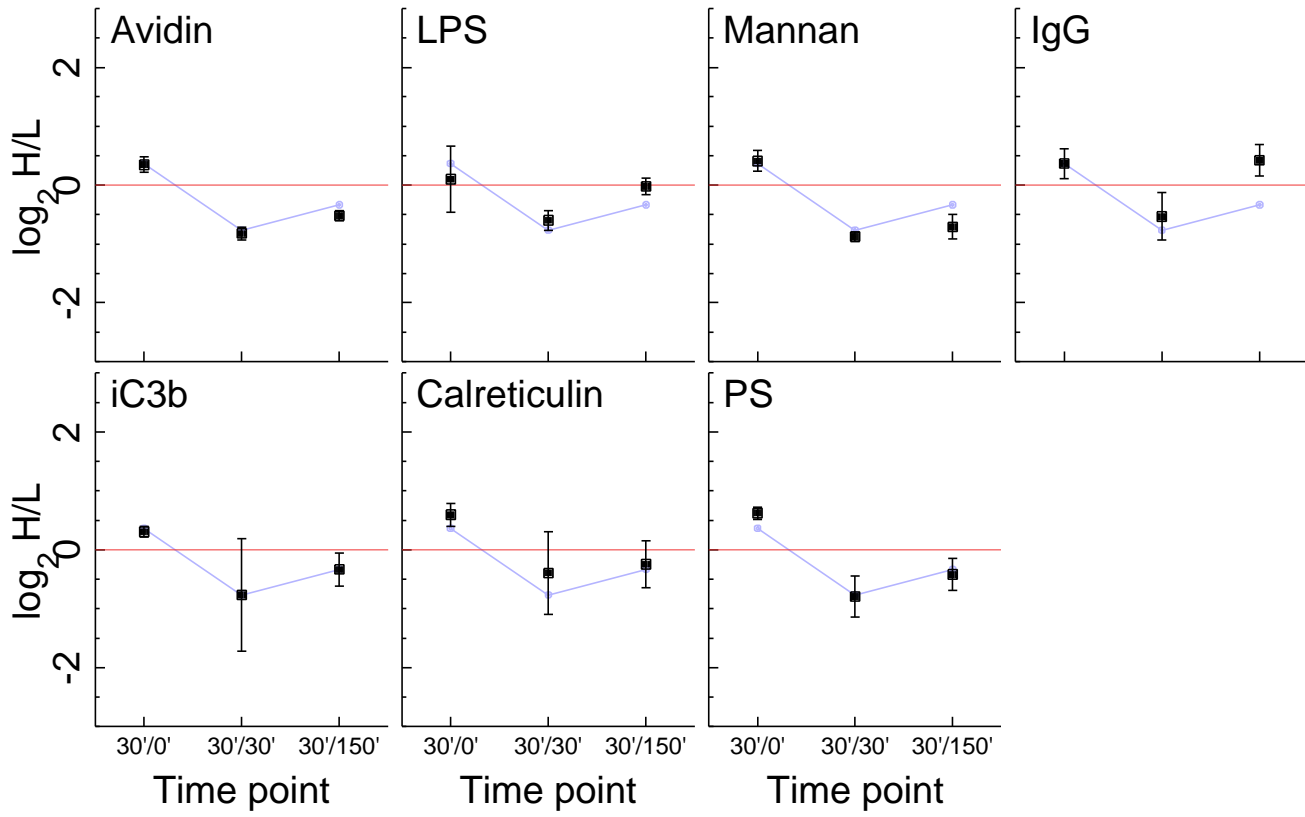

erap1 (Q9EQH2)

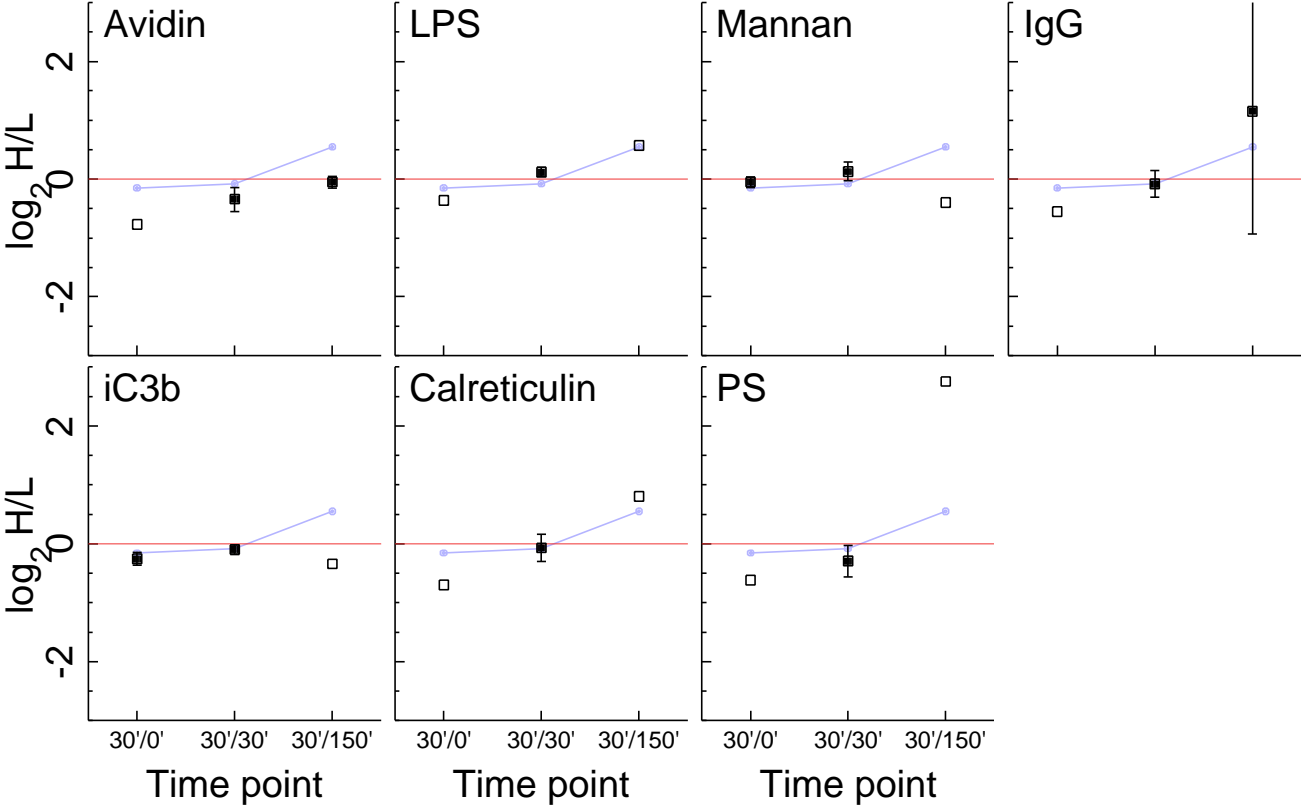

### erbb2ip (Q80TH2)

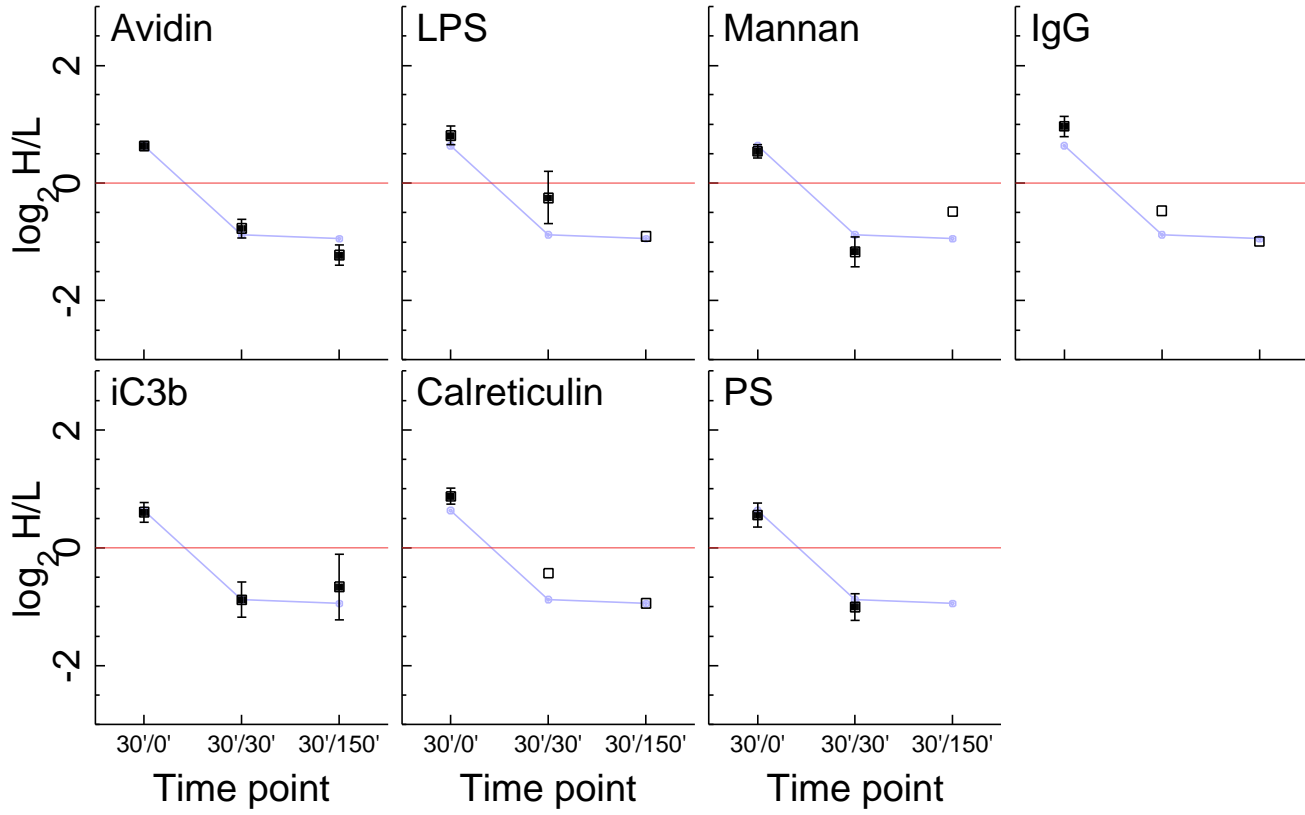

ergic1 (Q9DC16)

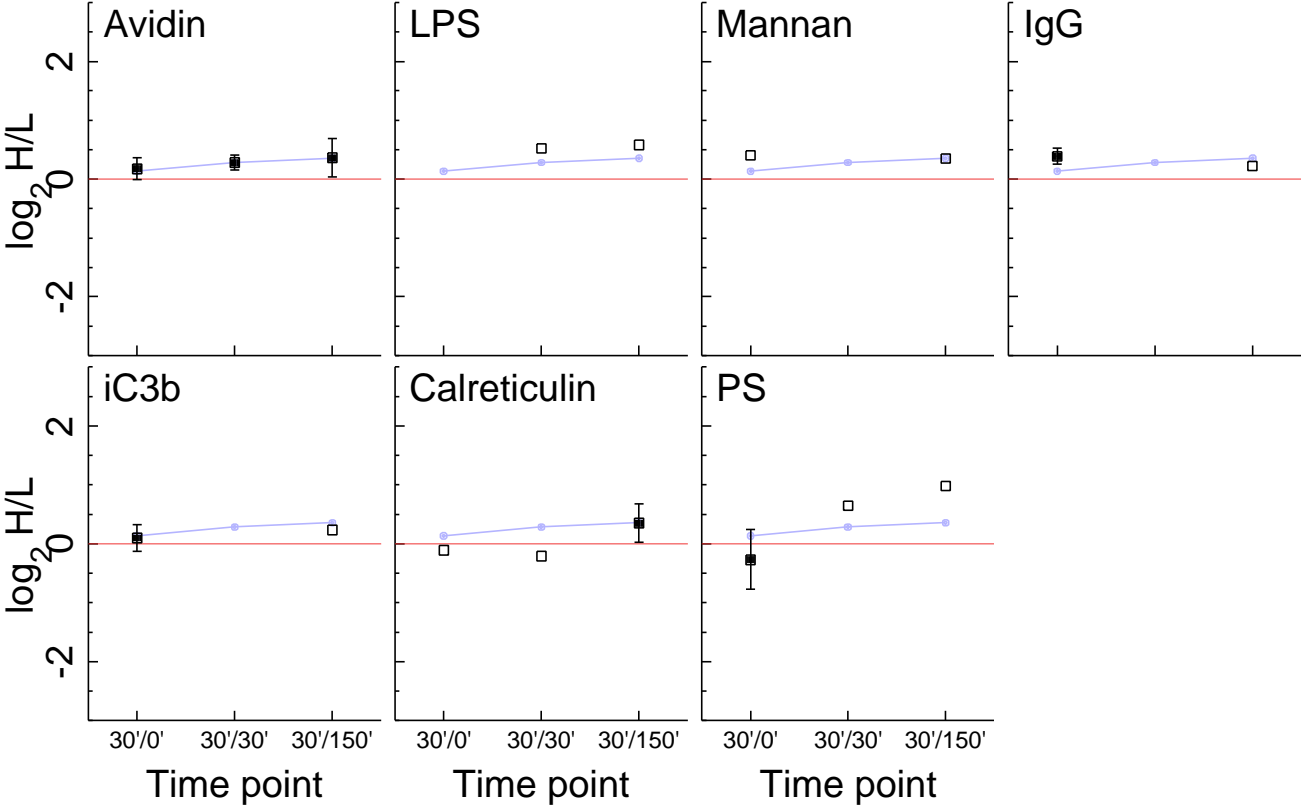

erh (G3UW85)

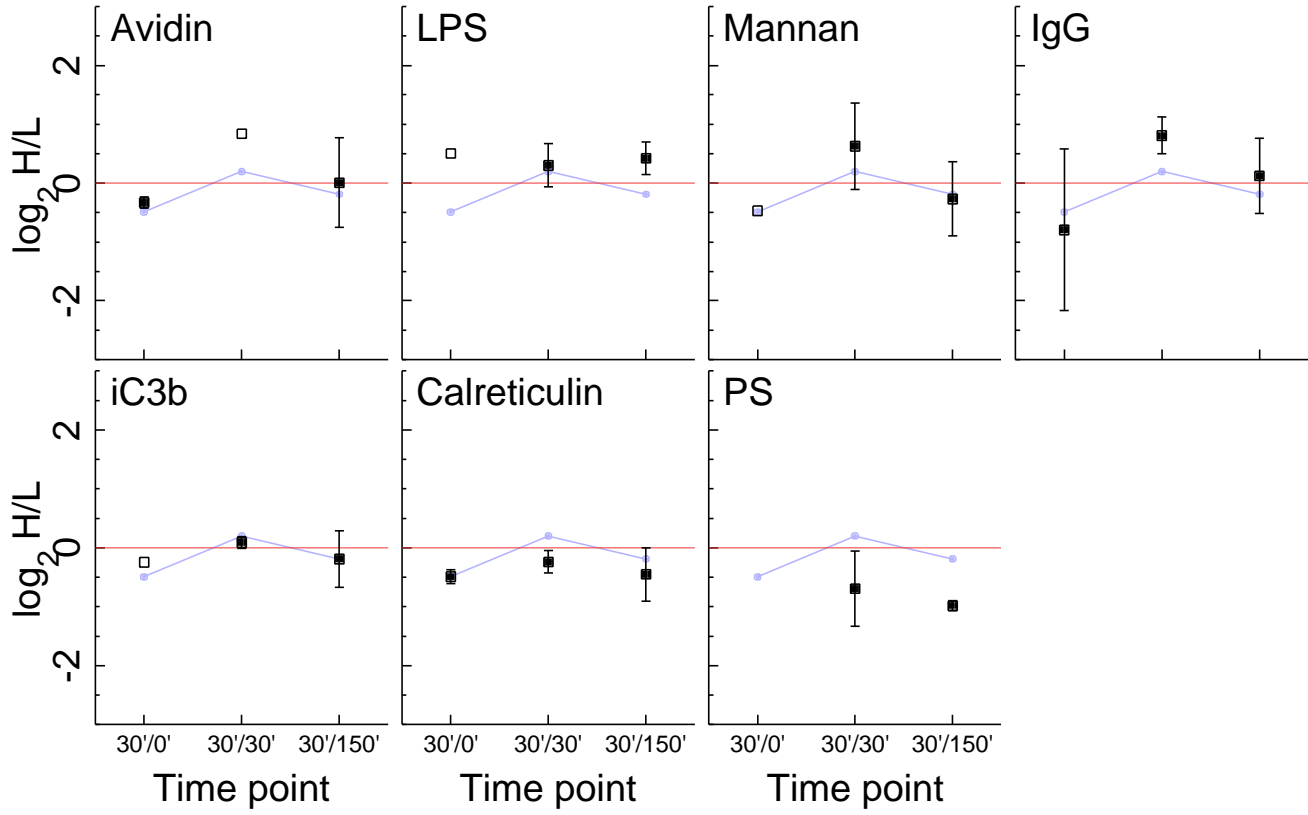

### erlin1 (Q91X78)

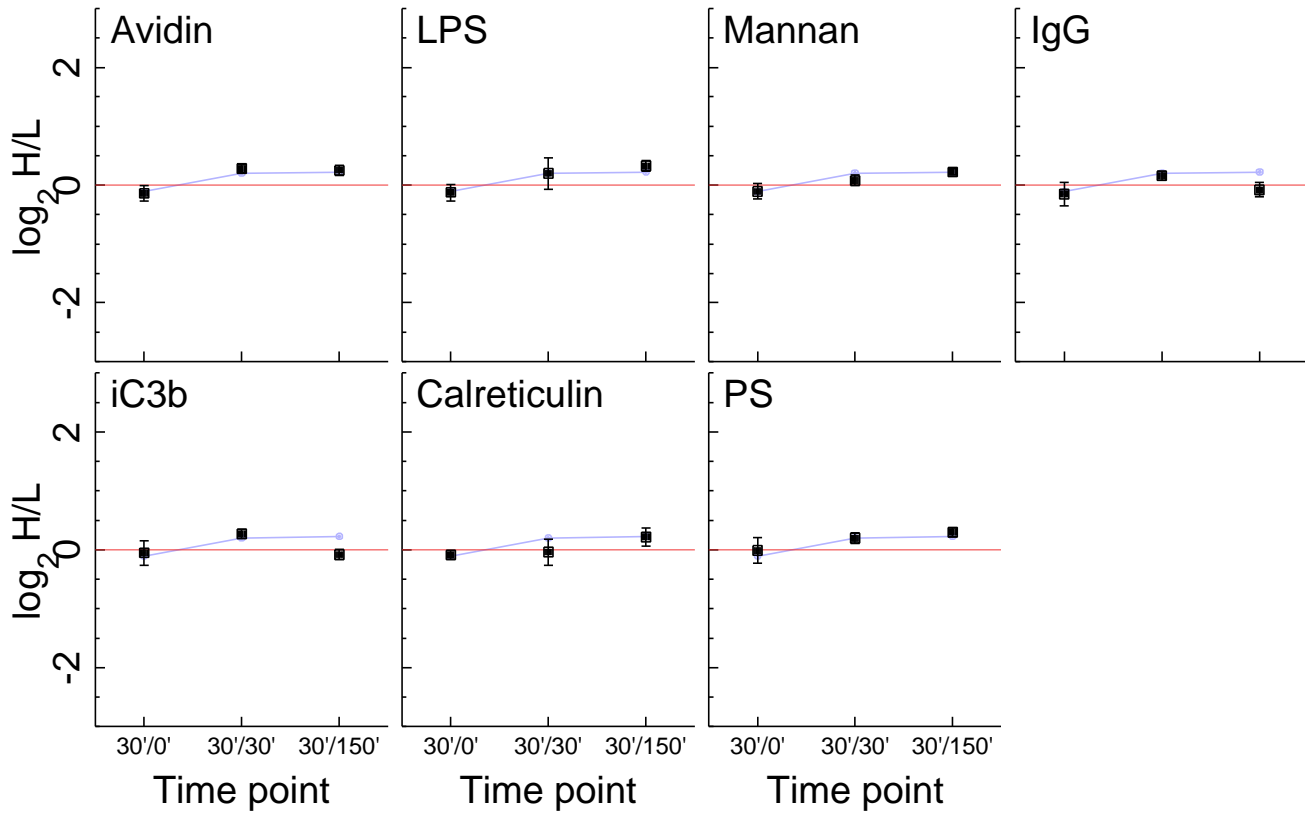

erlin2 (Q8BFZ9)

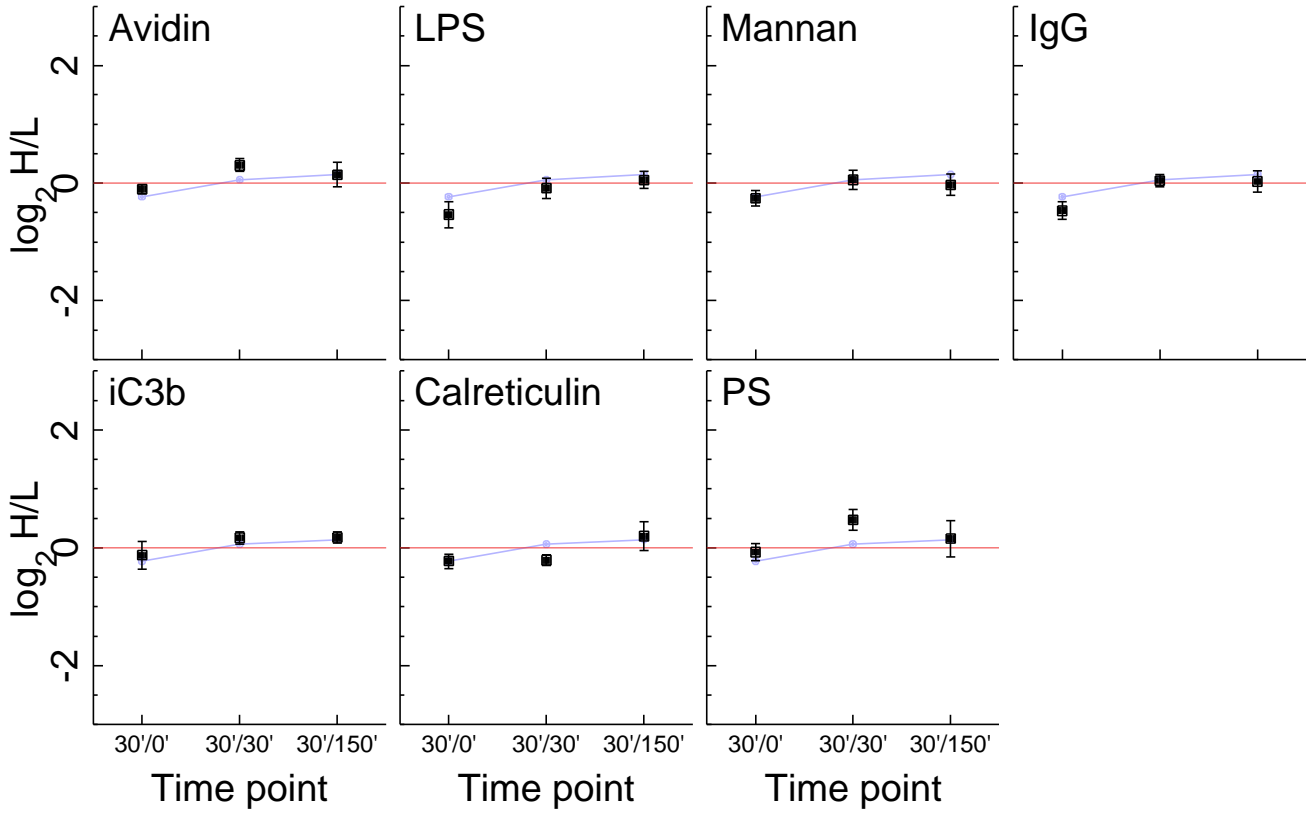

### erp29 (P57759)

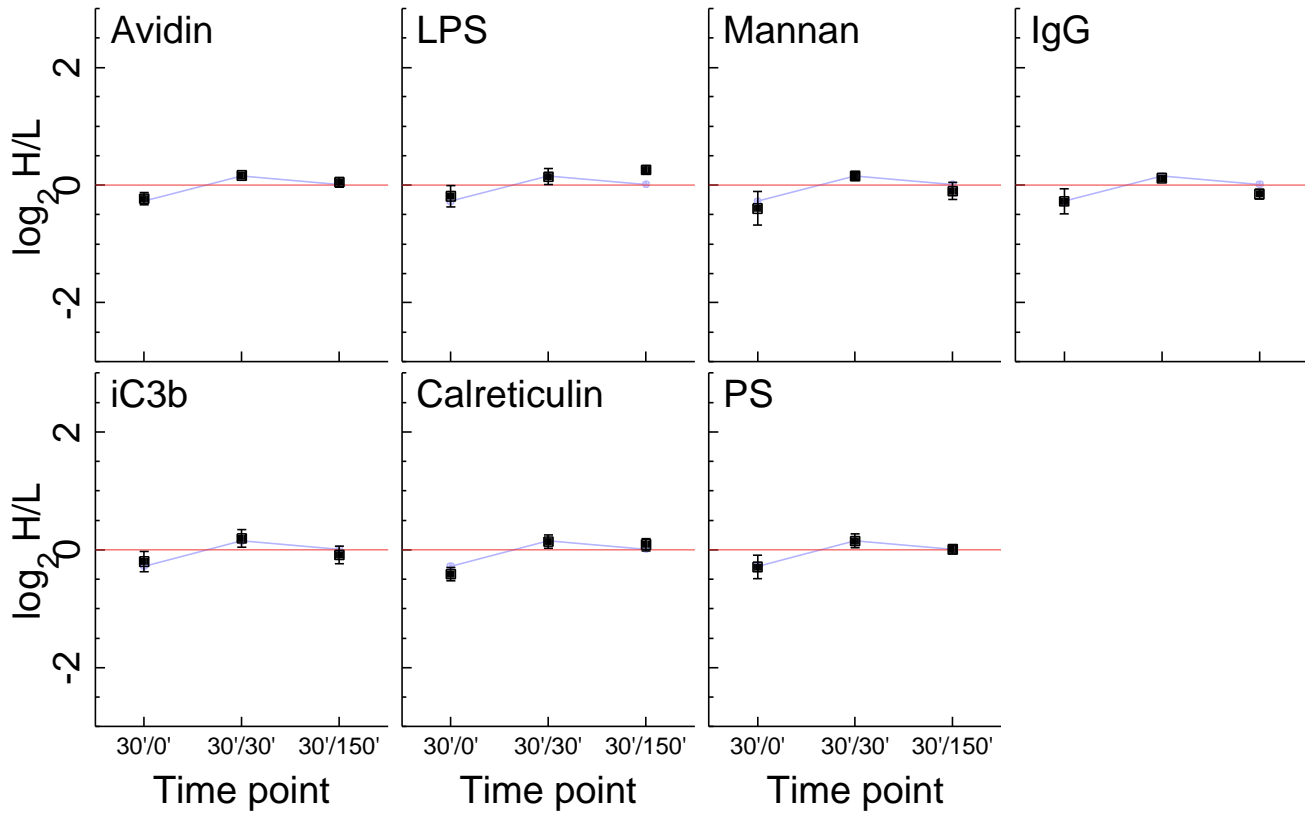



erp44 (Q9D1Q6)

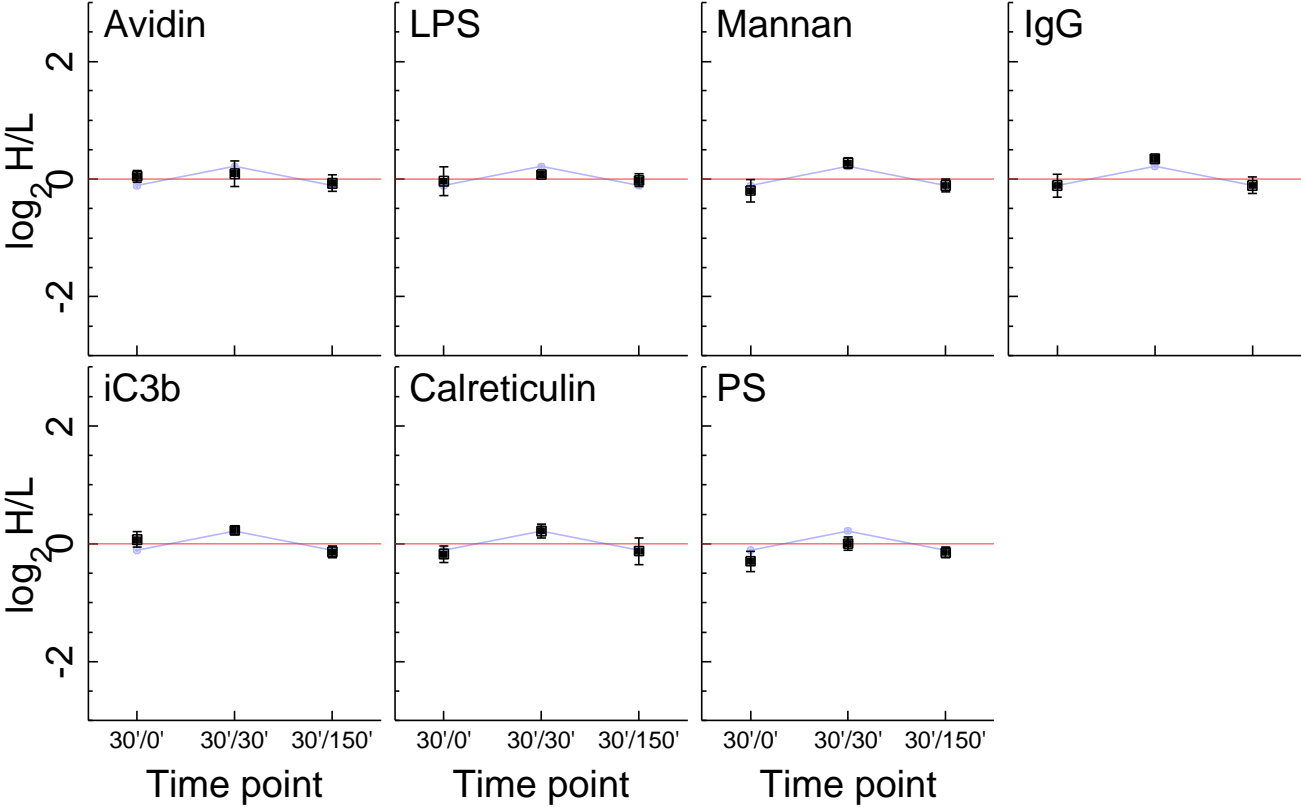

esd (H3BKH6)

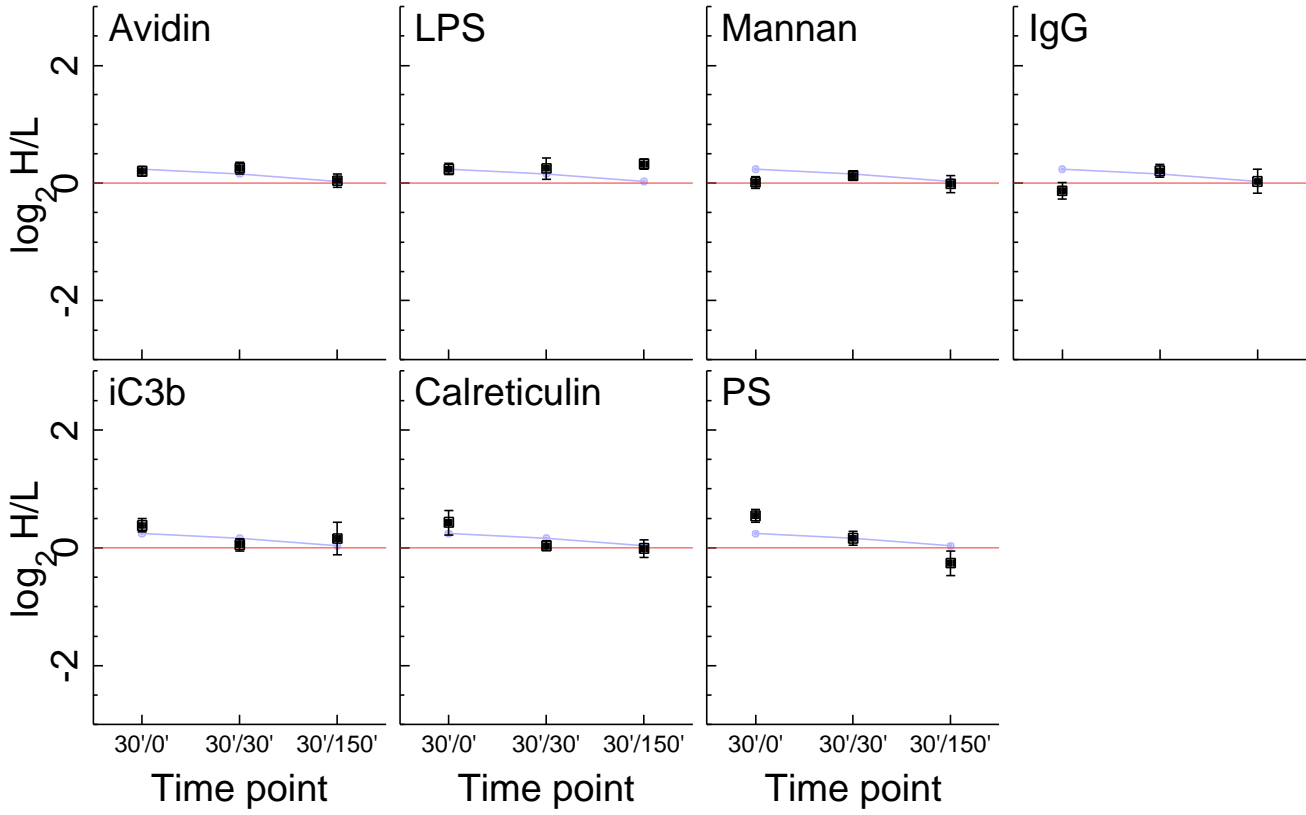

esy1 (Q3U7R1)

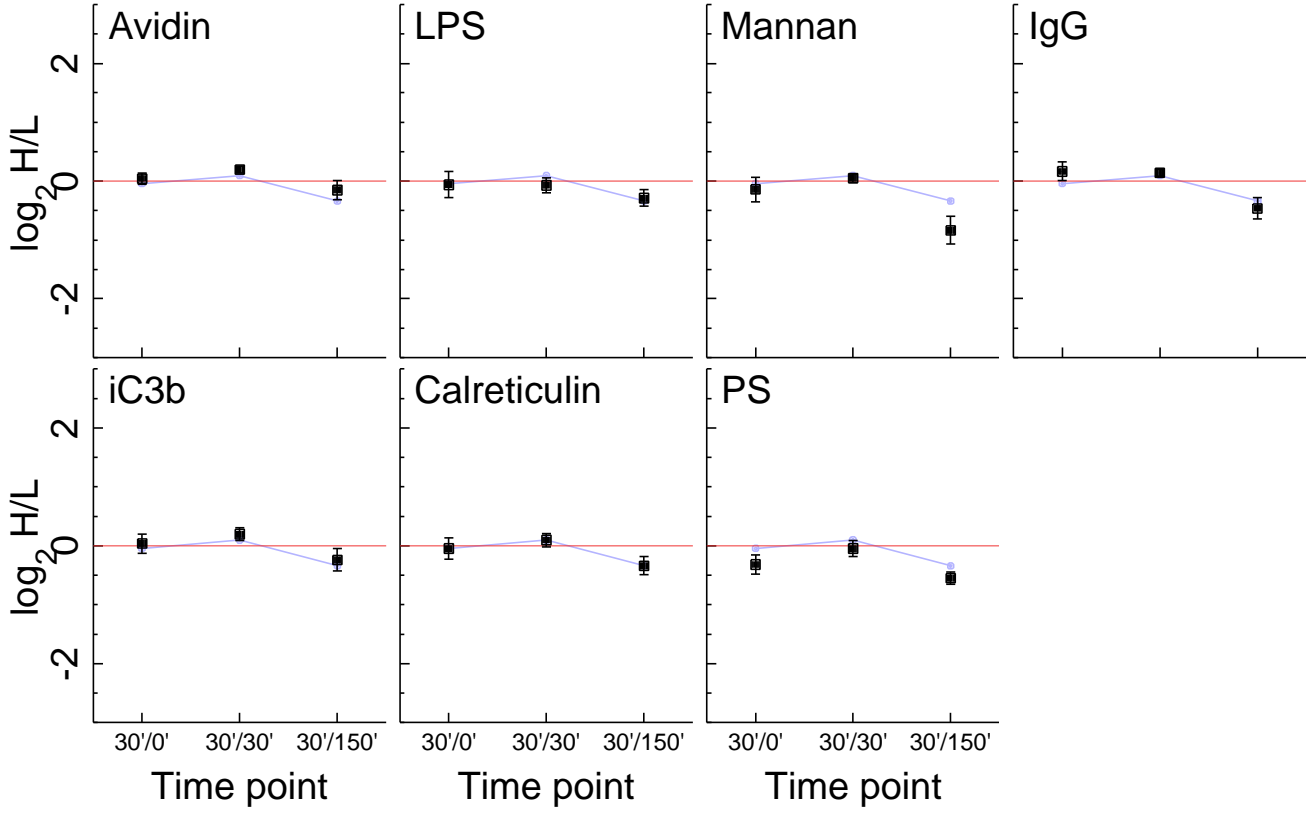

### esy2 (Q3TZZ7)

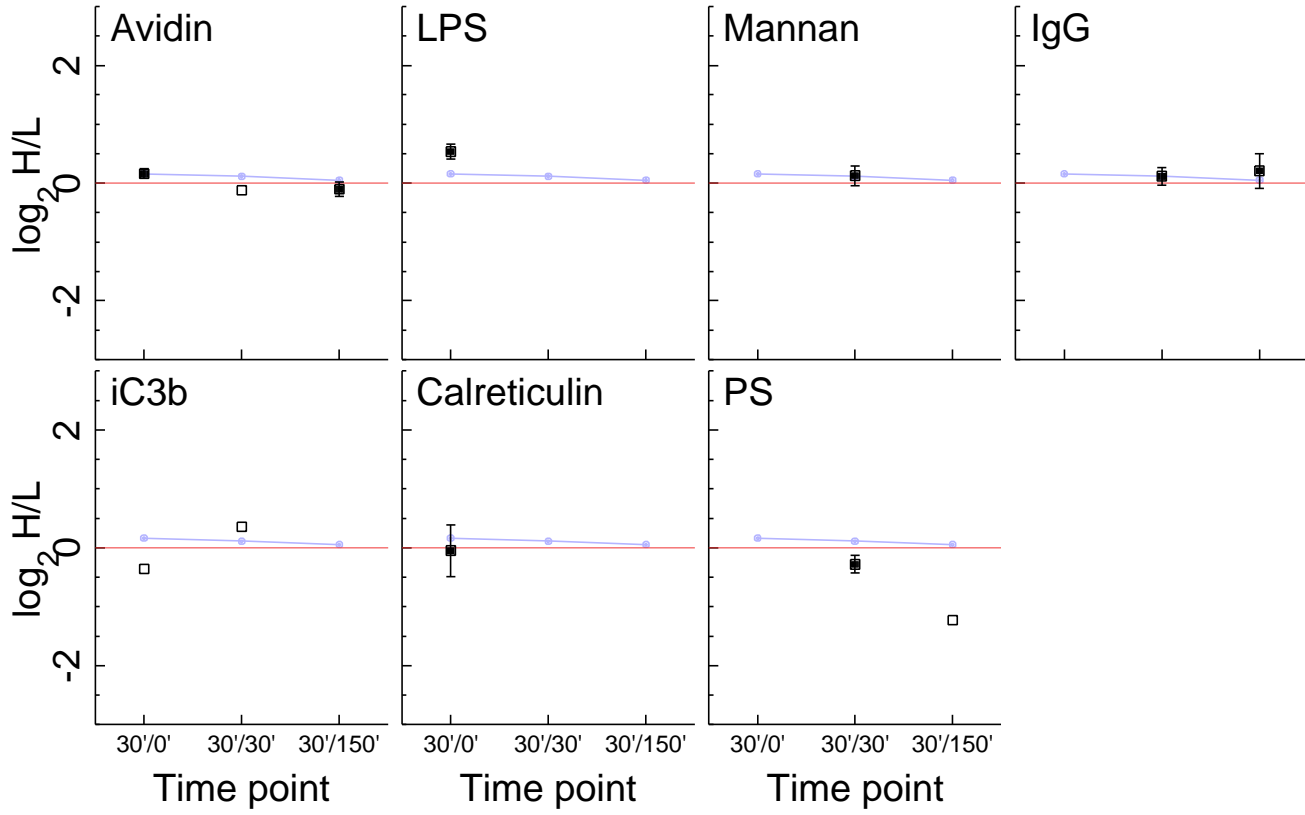

etf1 (Q8BWY3)

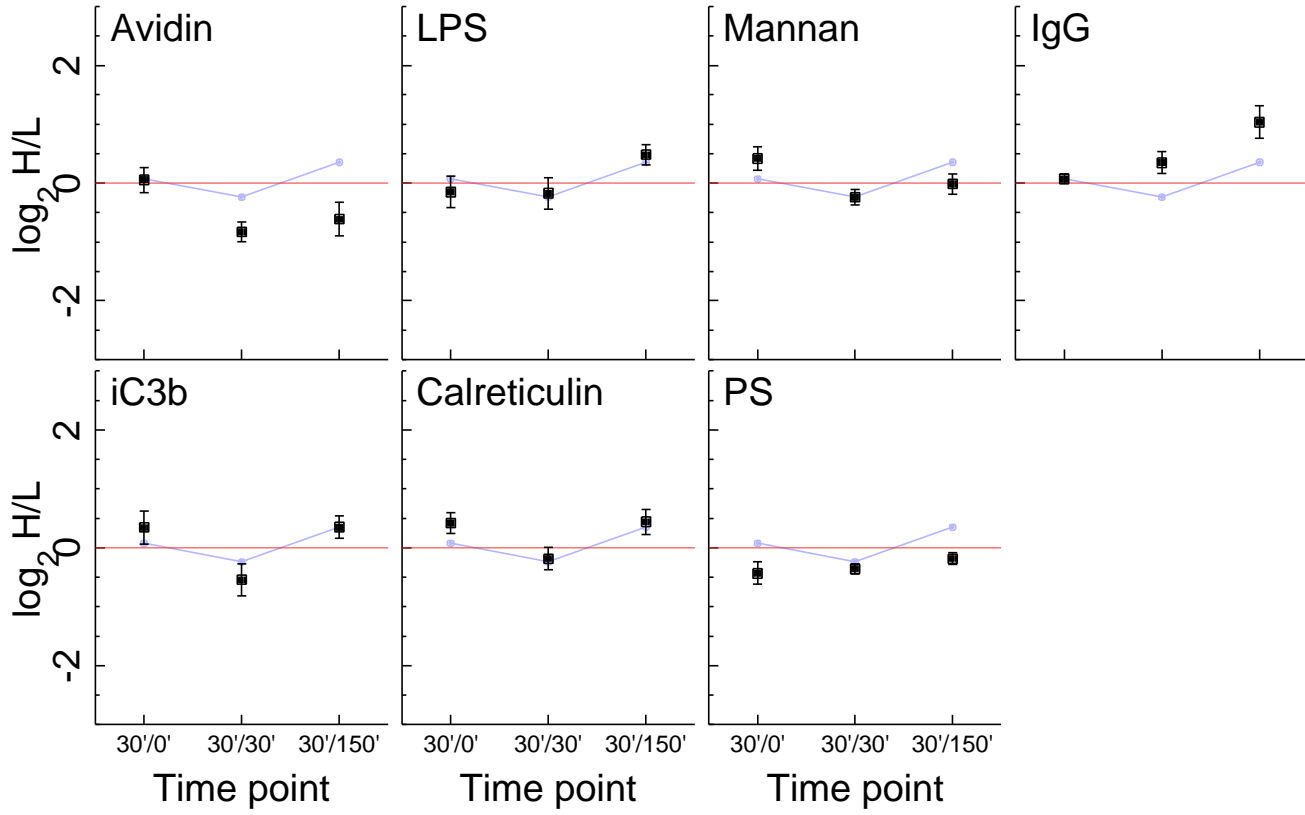

### etfa (Q99LC5)

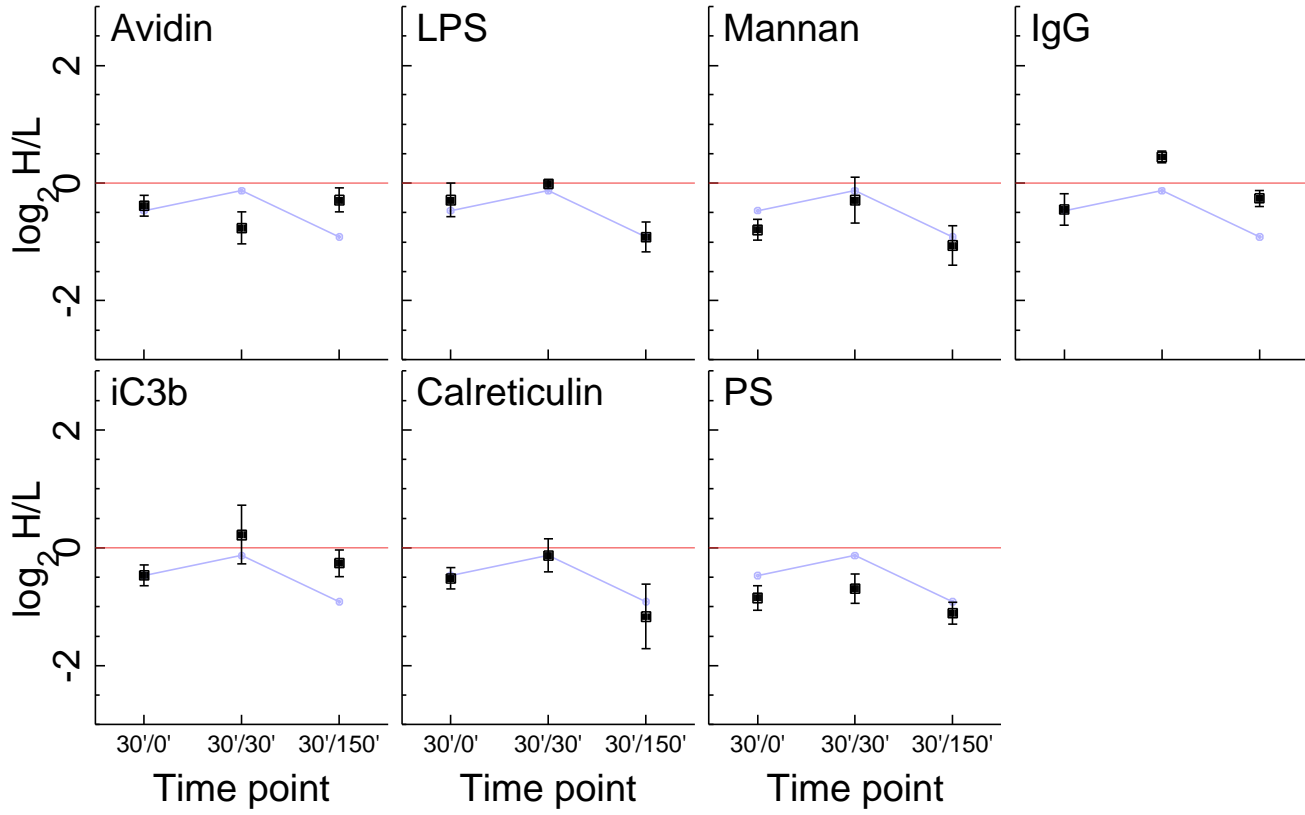

etfb (Q9DCW4)

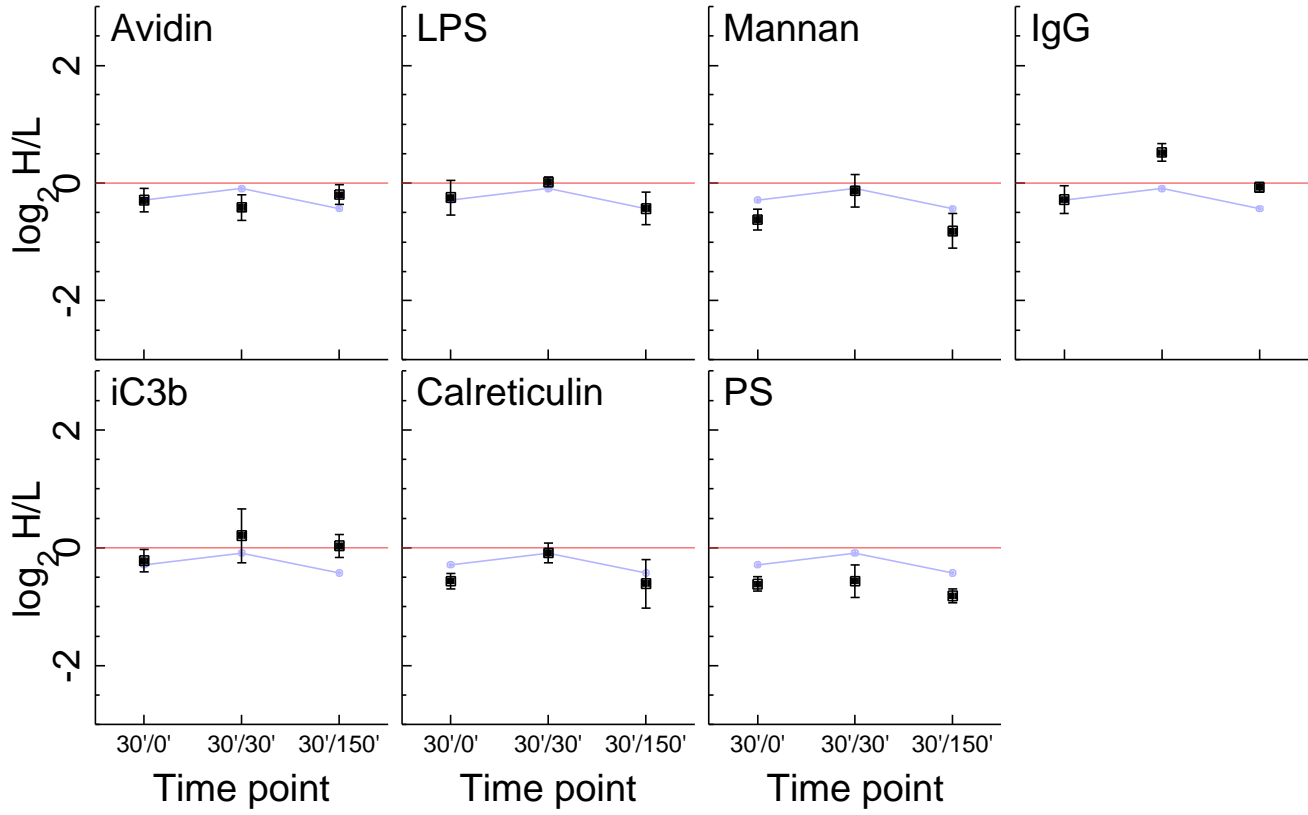

etfdh (Q921G7)

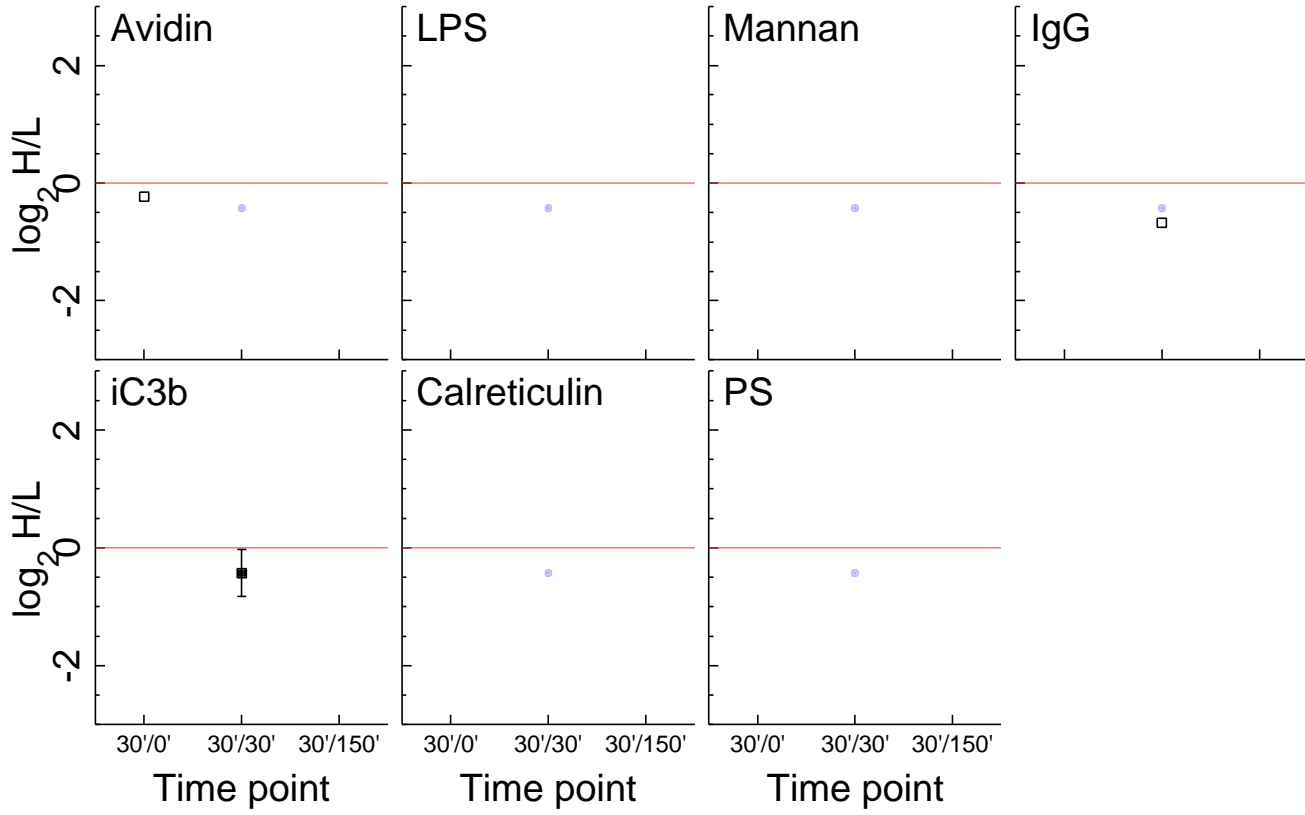



evi2a (P20934)

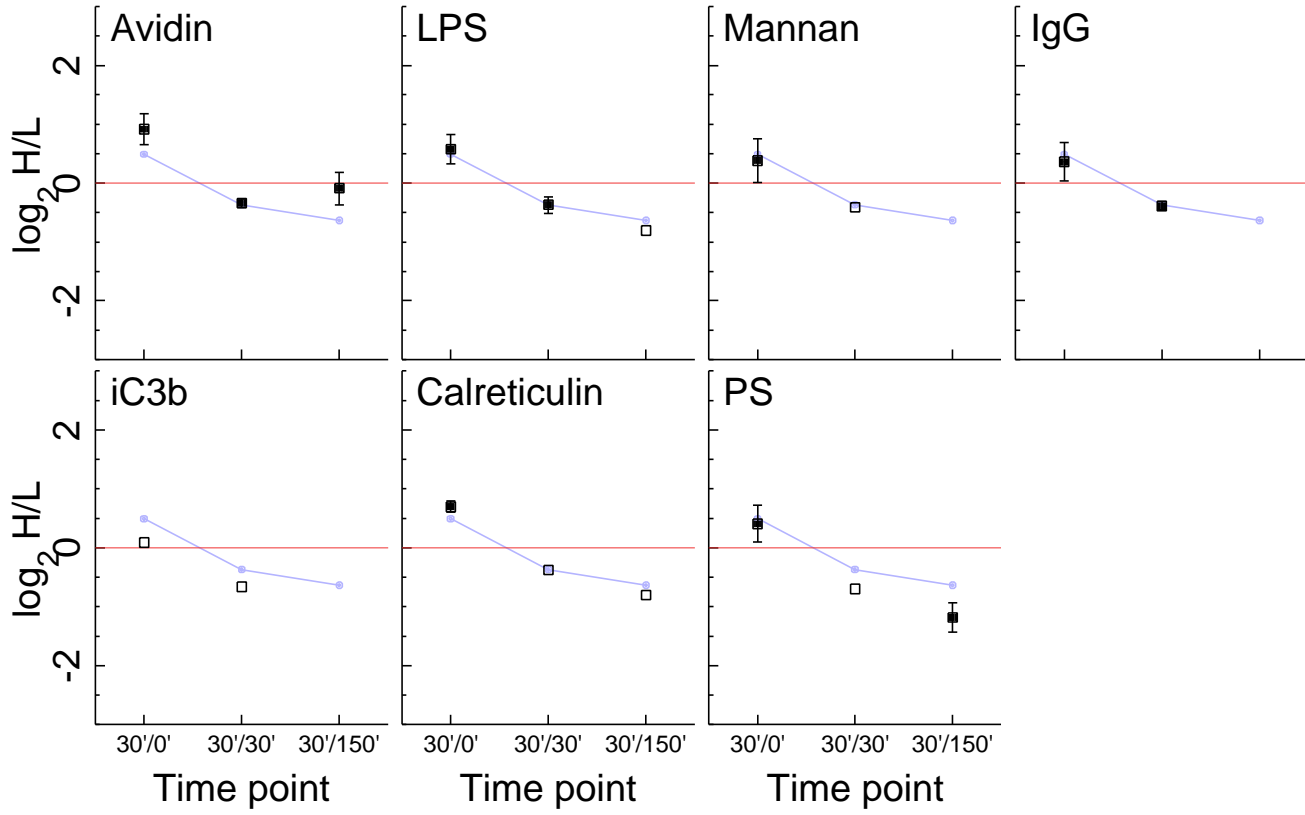

evi2b (Q8VD58)

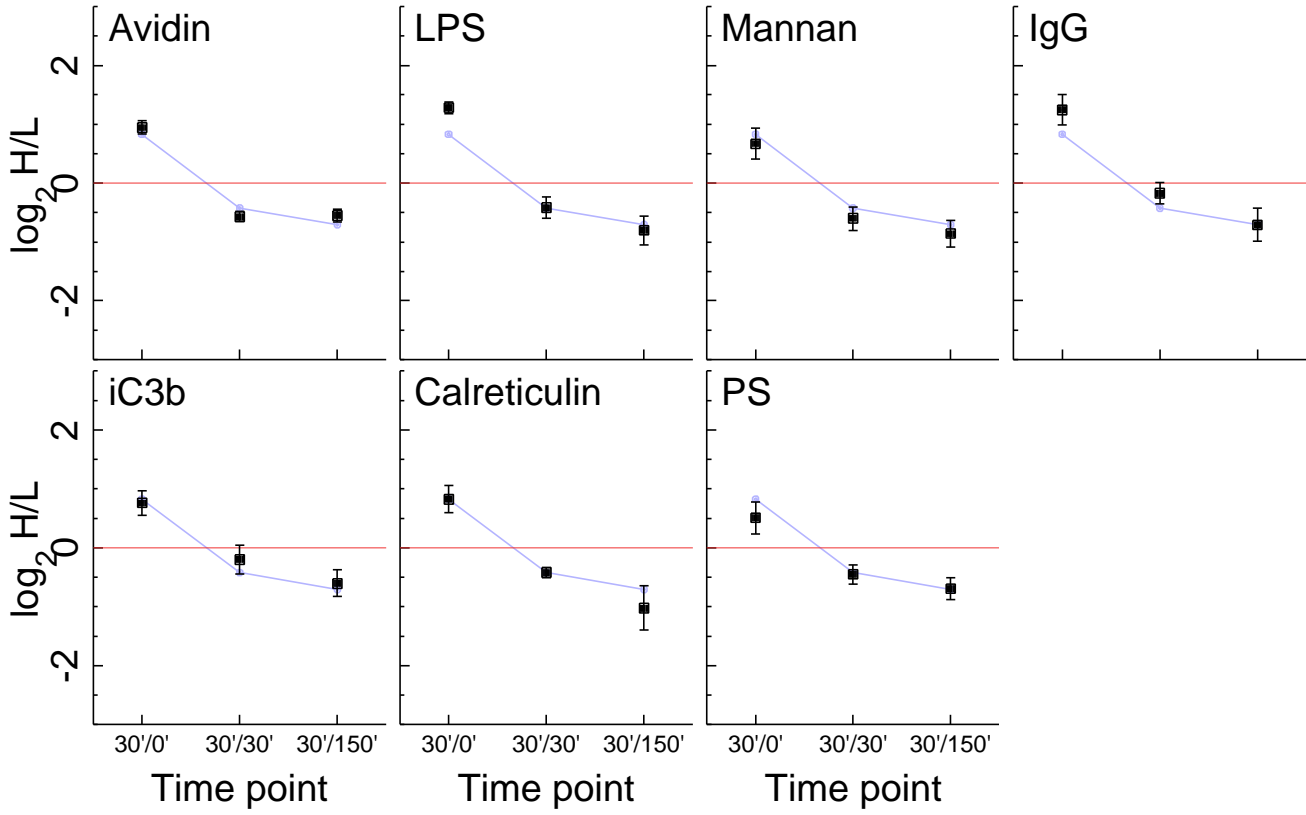

evl (P70429)

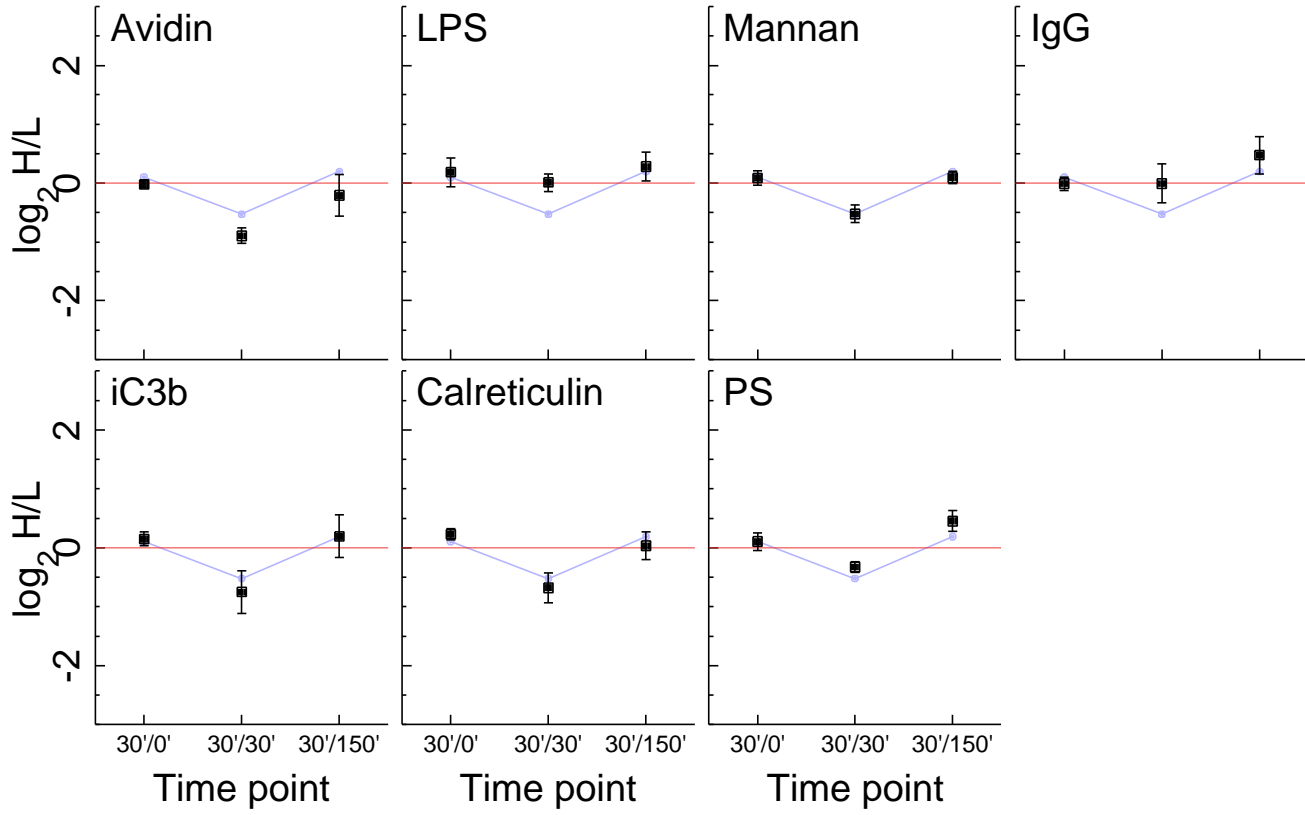

ewsr1 (Q5SUS9)

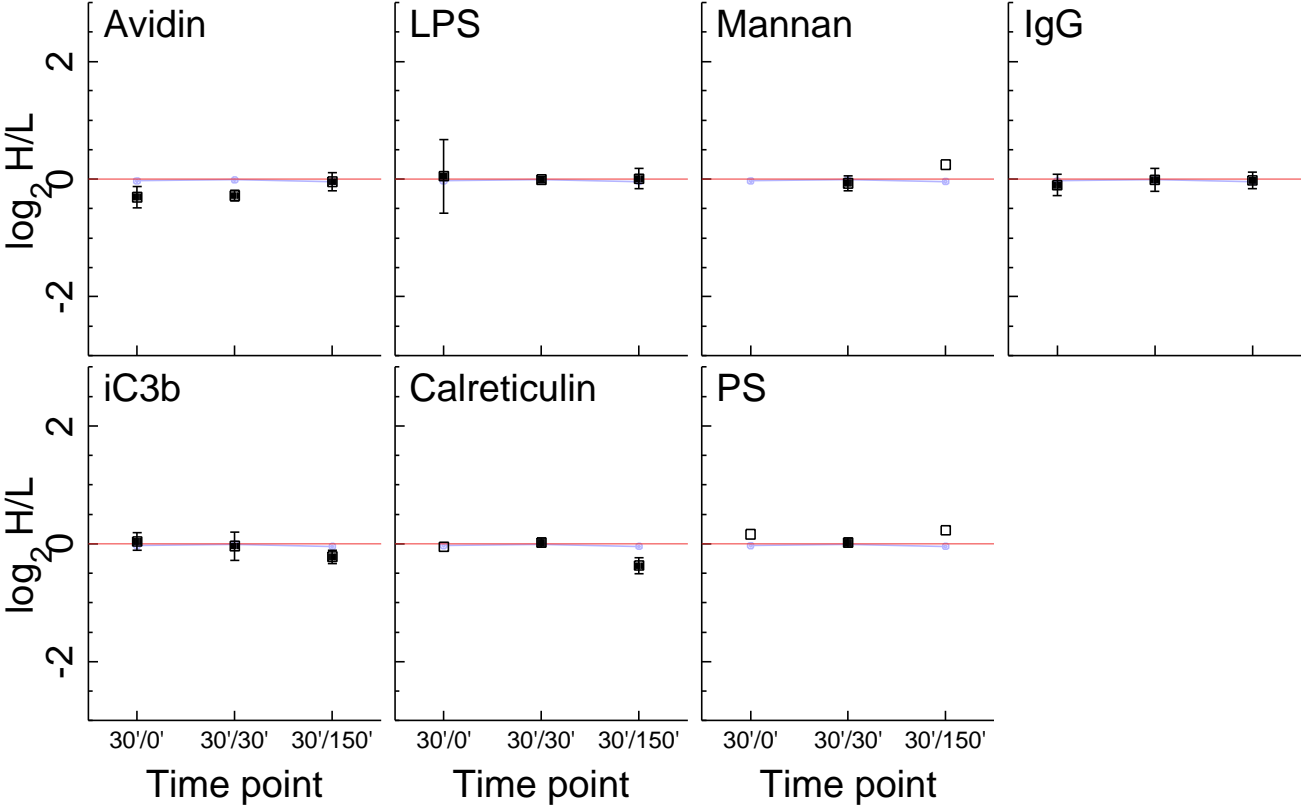

ezr (P26040)

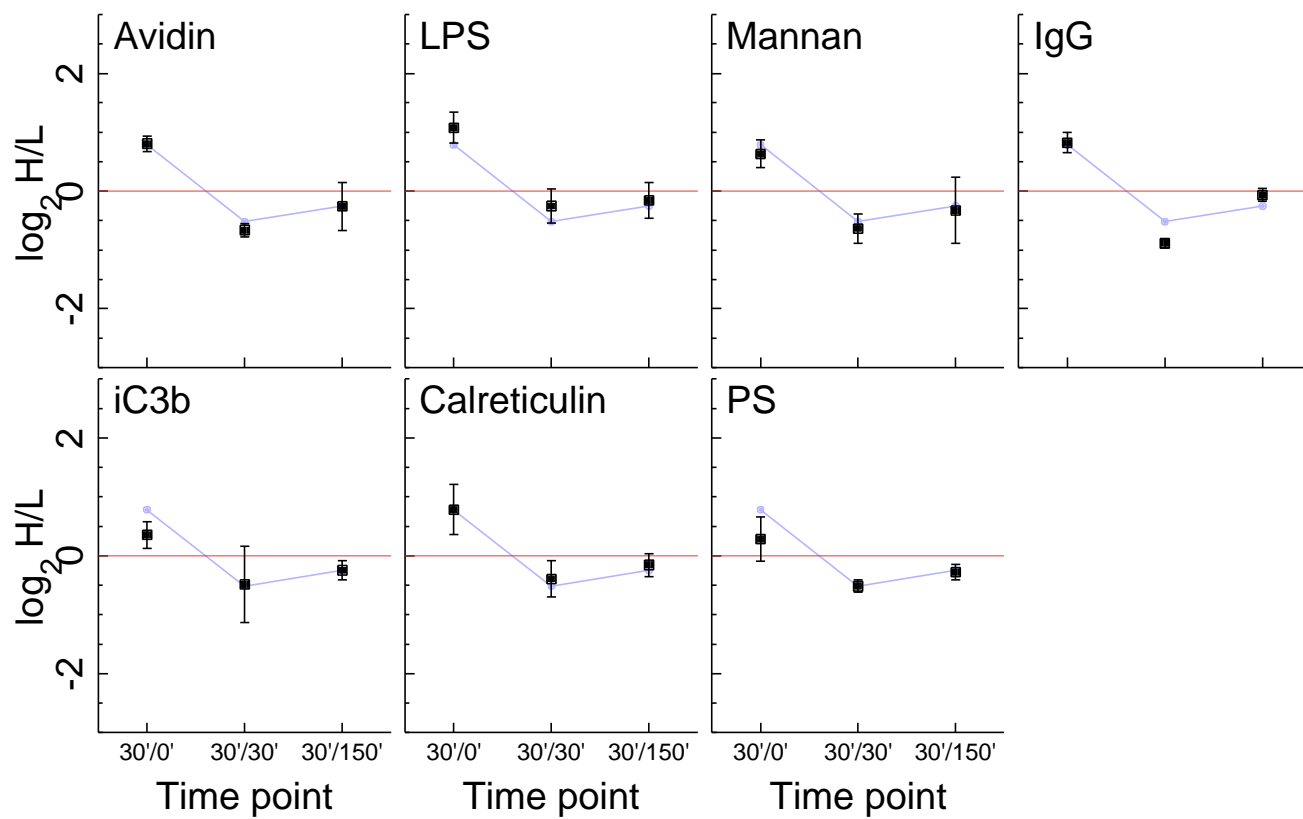

### f13a1 (Q8BH61)

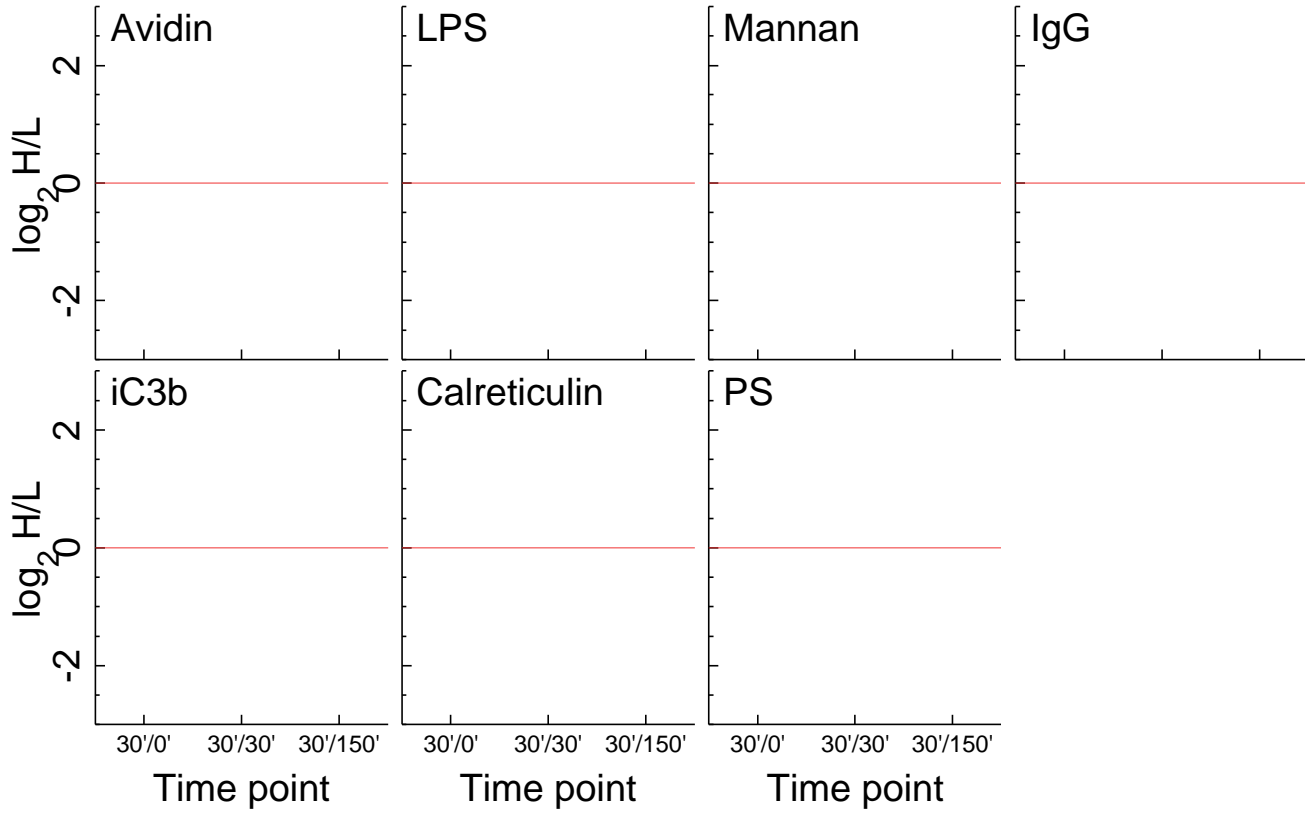

### faf2 (Q3TDN2)

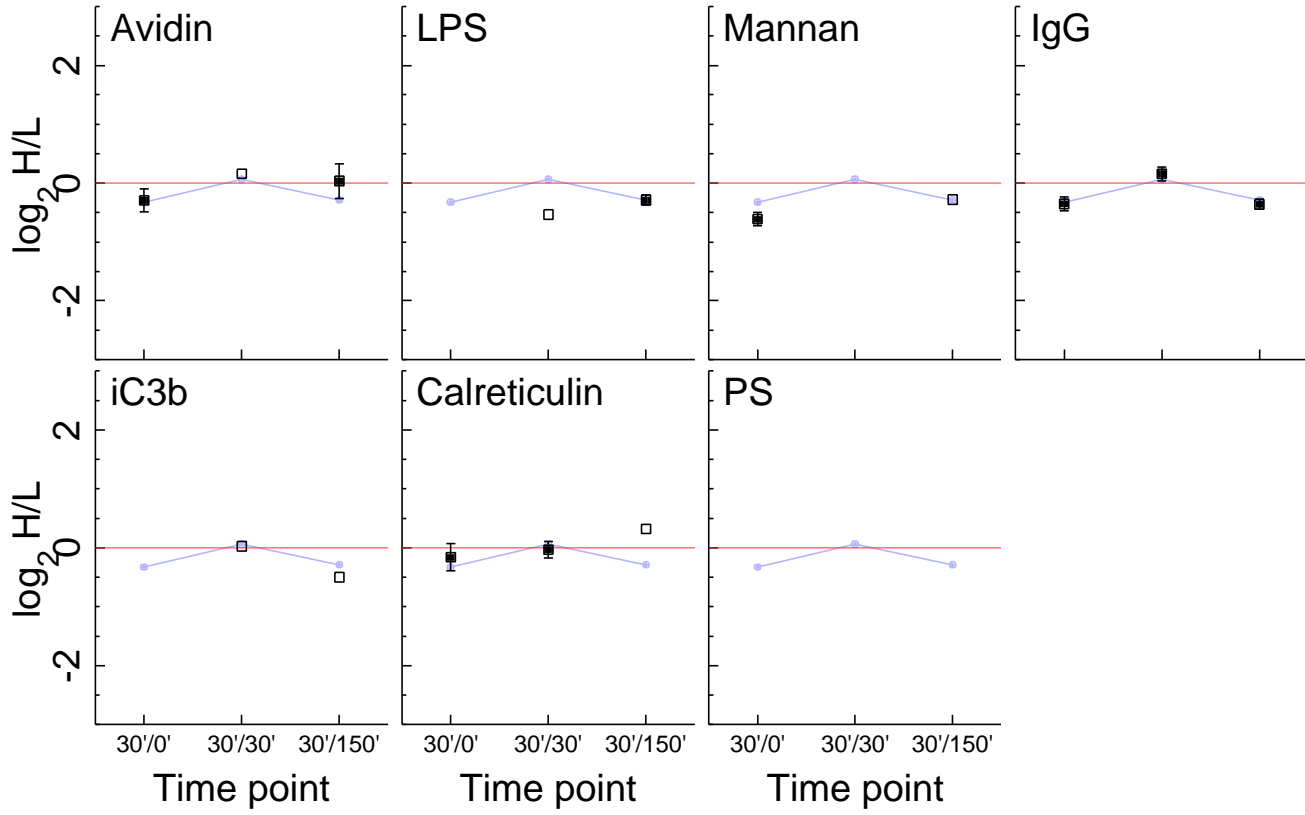

### fam108b1 (Q7M759)

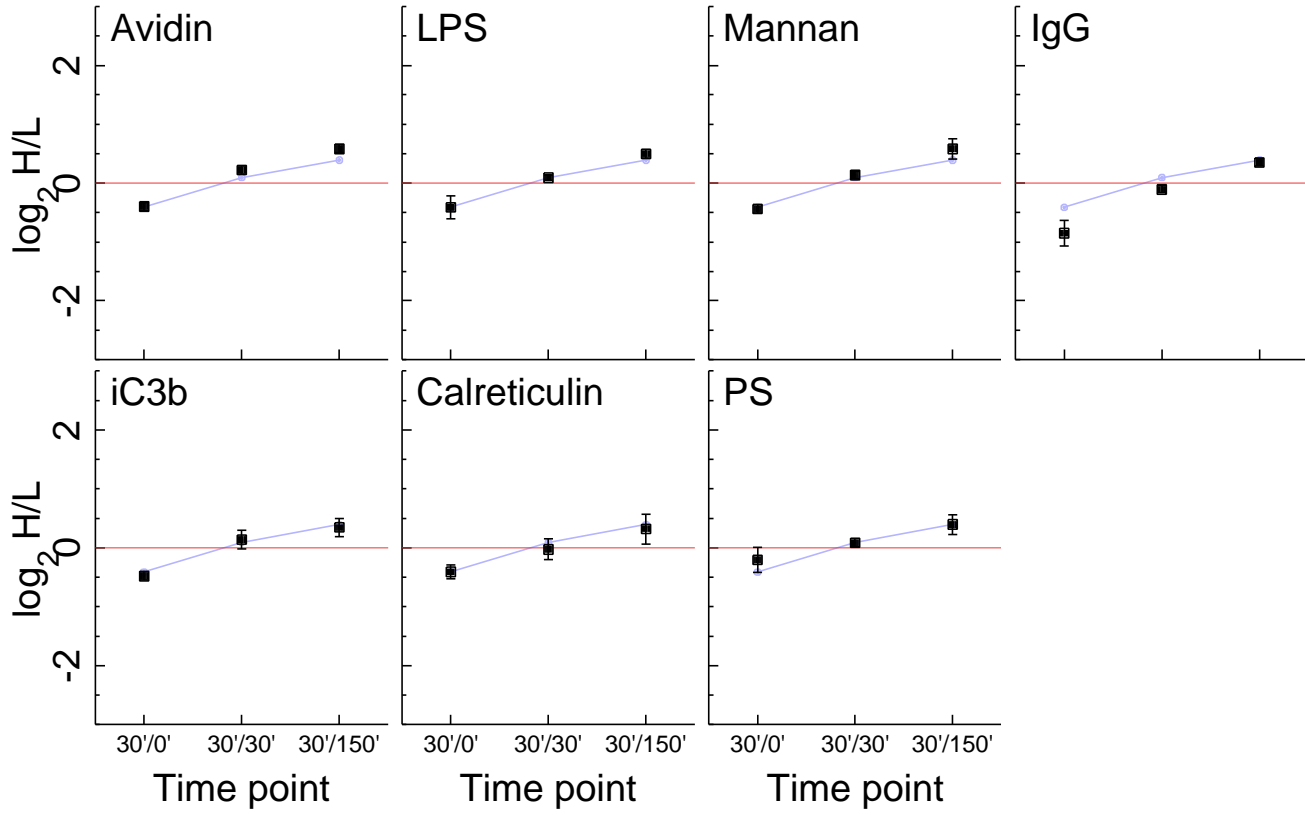



fam120a (Q6A0A9)

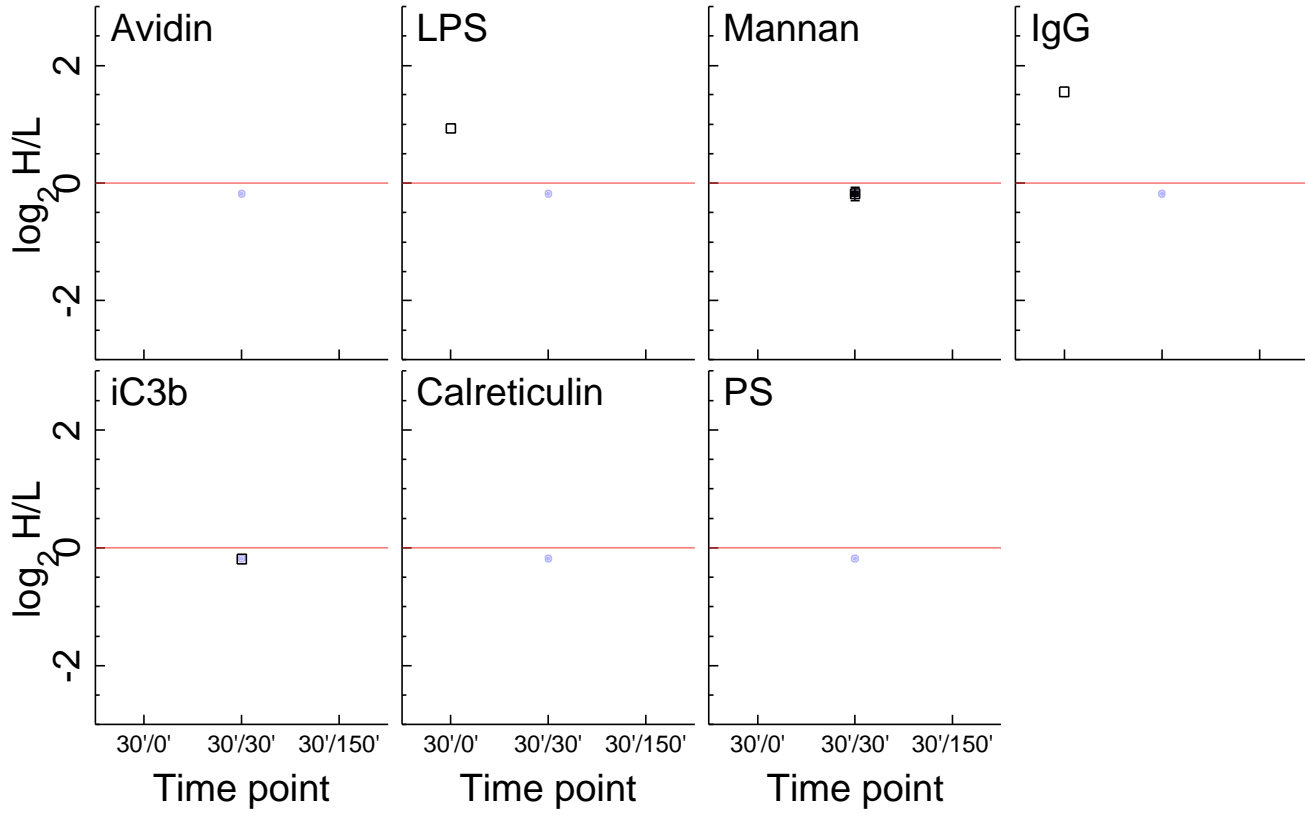

### fam125a (Q78HU3)

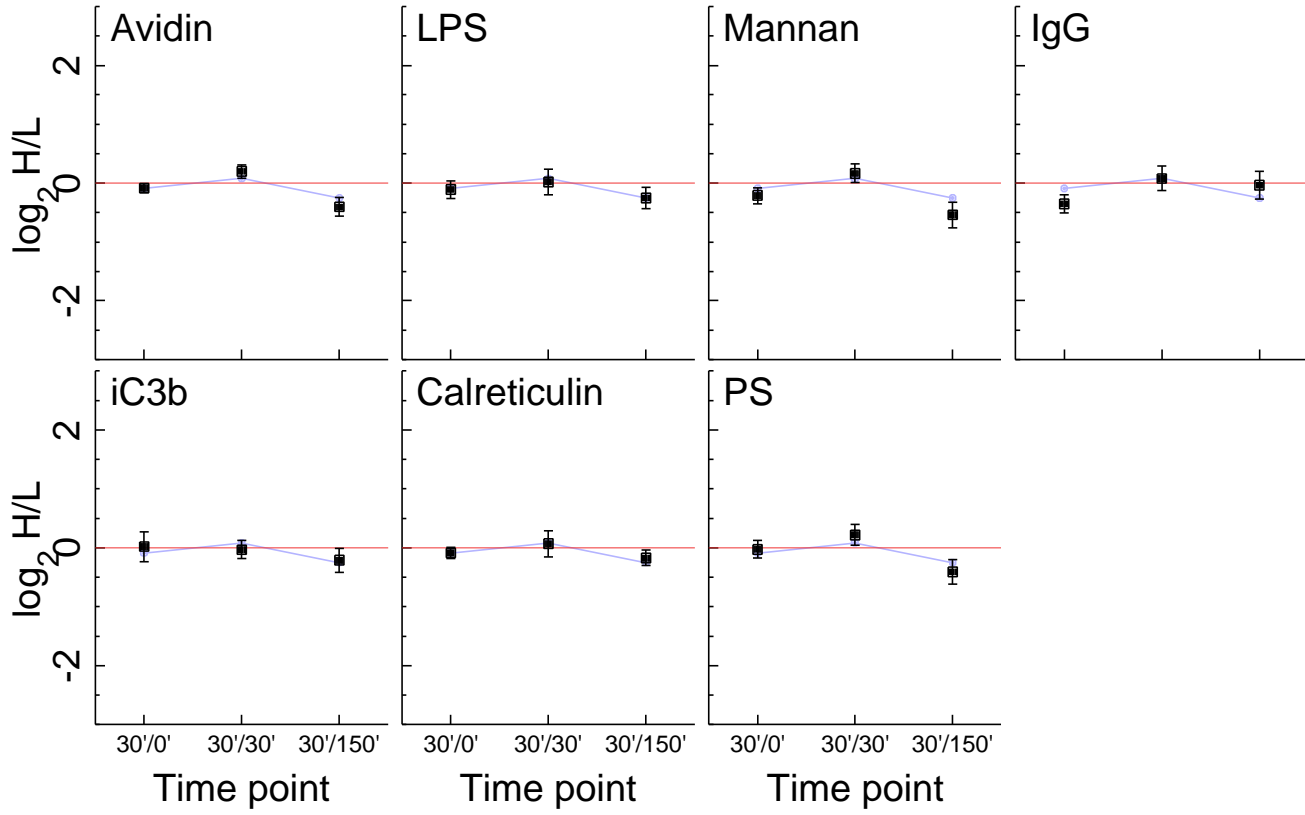

fam129a (Q3UW53)

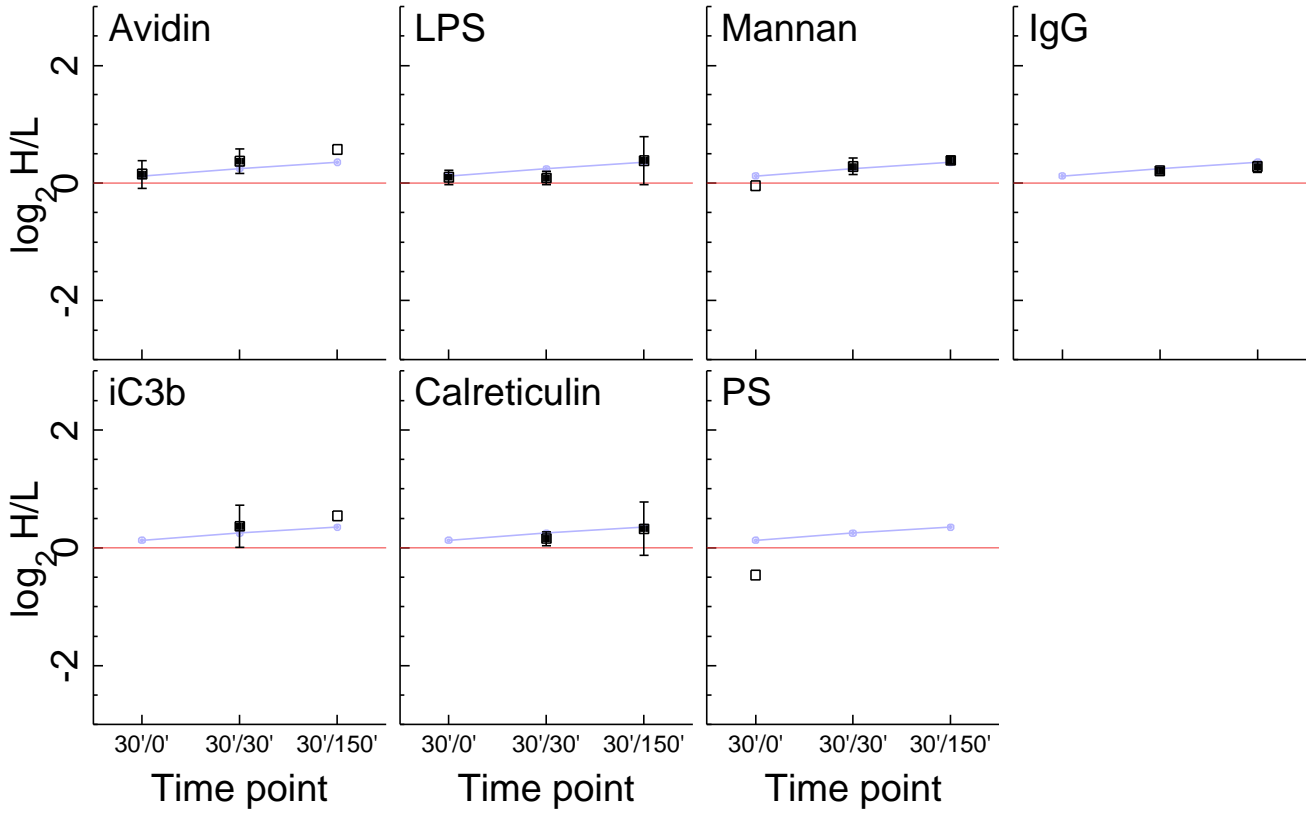

### fam129b (Q8R1F1)

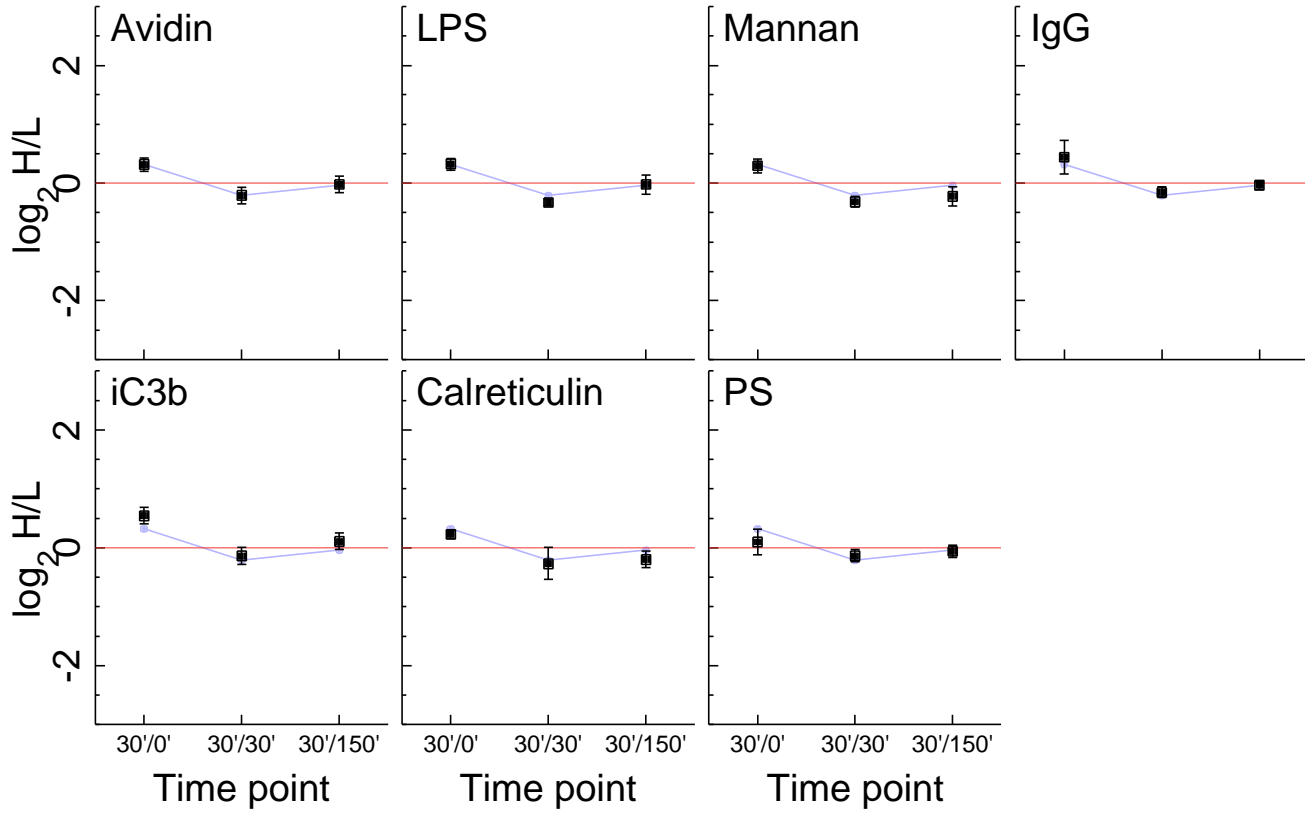

### fam168a (Q8BGZ2)

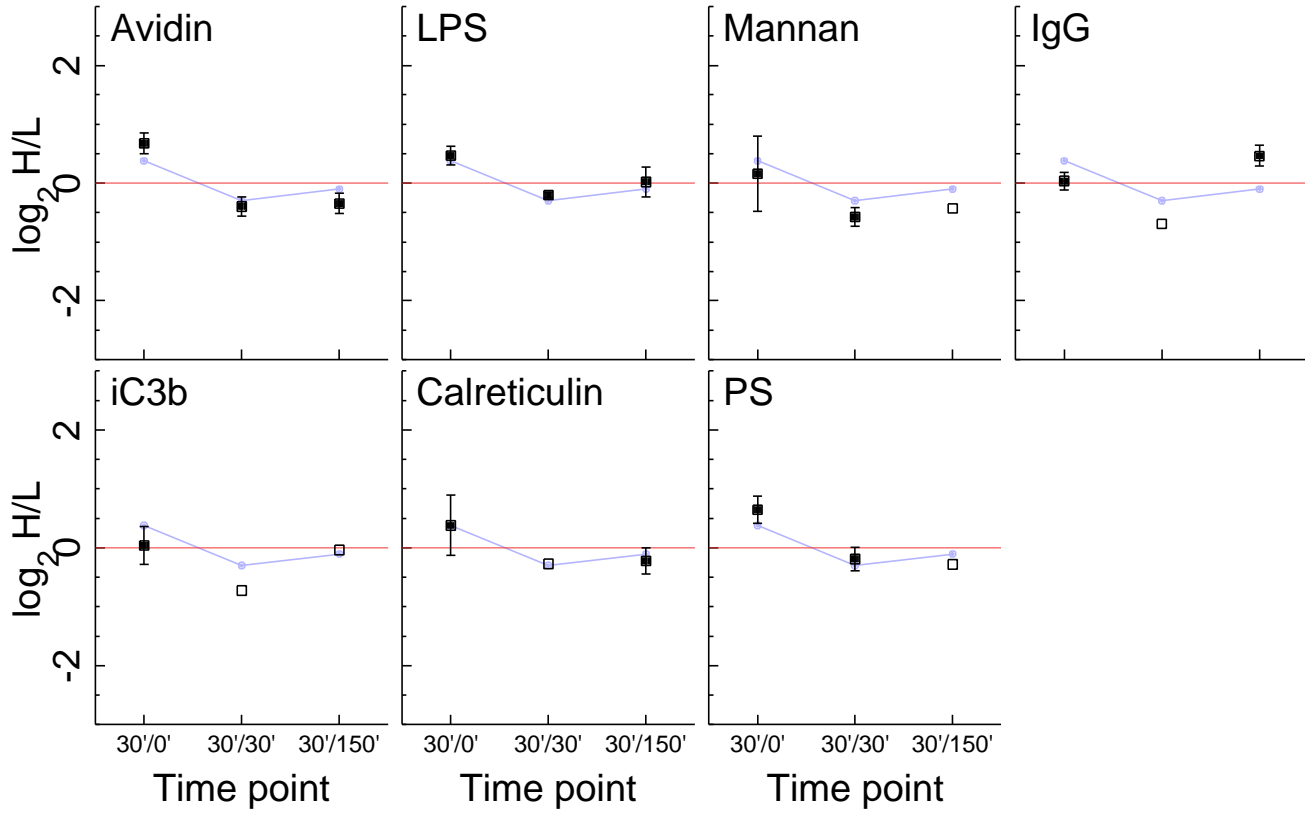

### fam177a1 (Q8BR63)

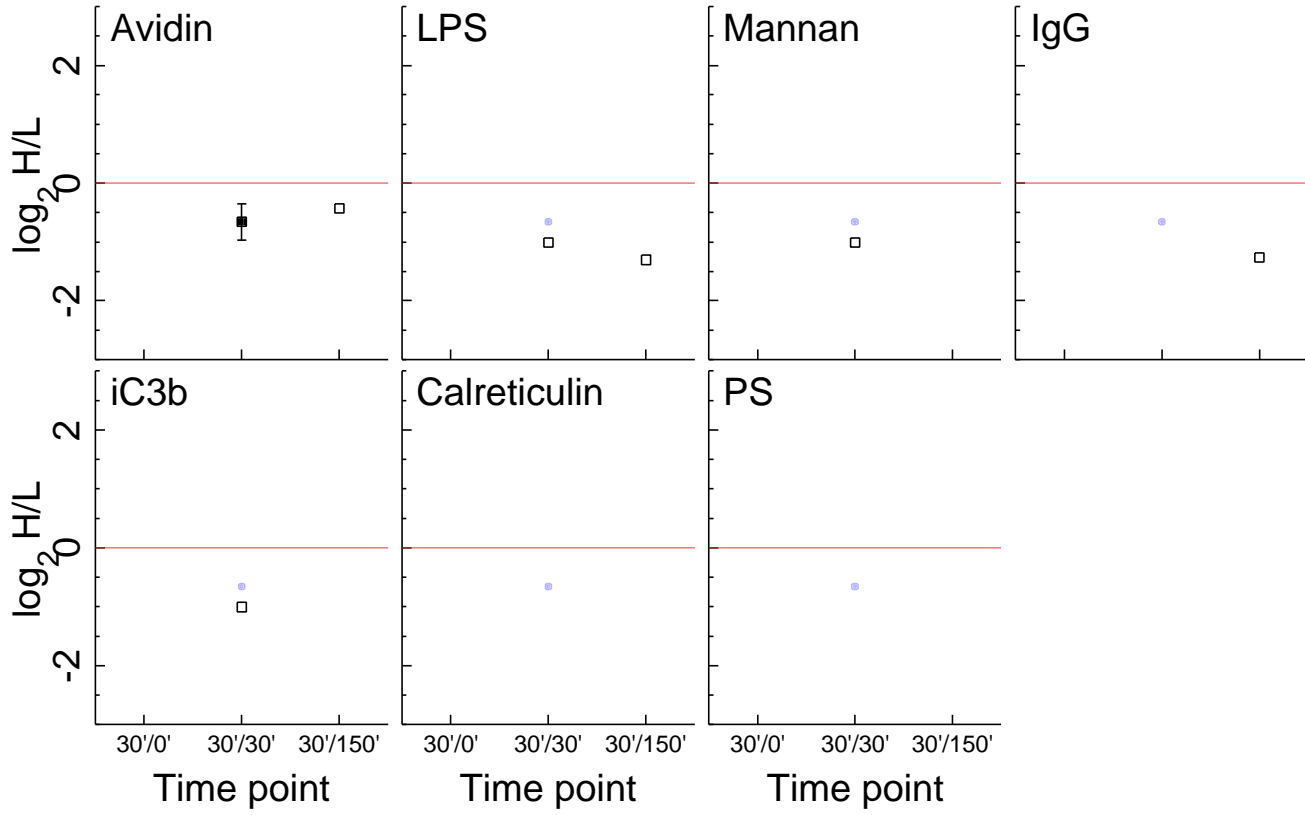

### fam195b (Q3UGS4)

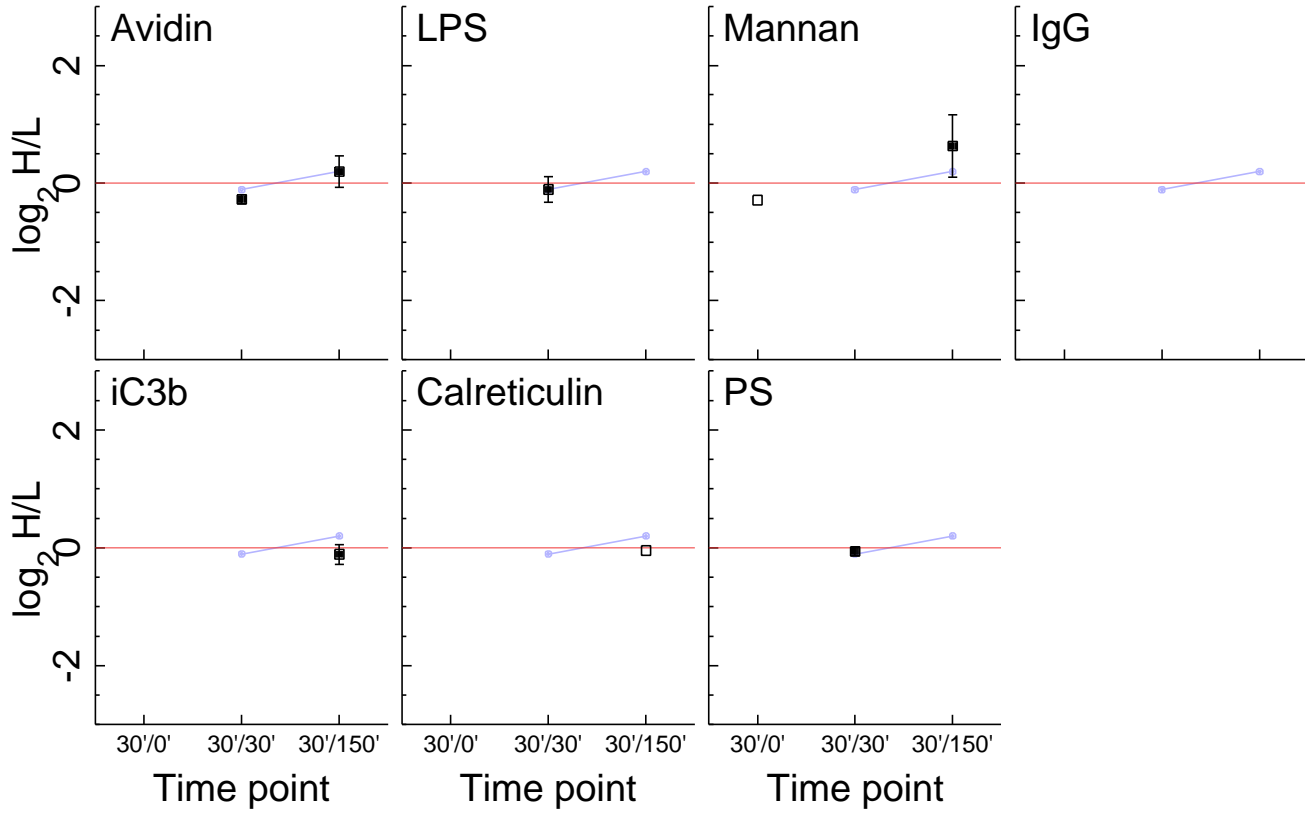

### fam21 (Q6PGL7)

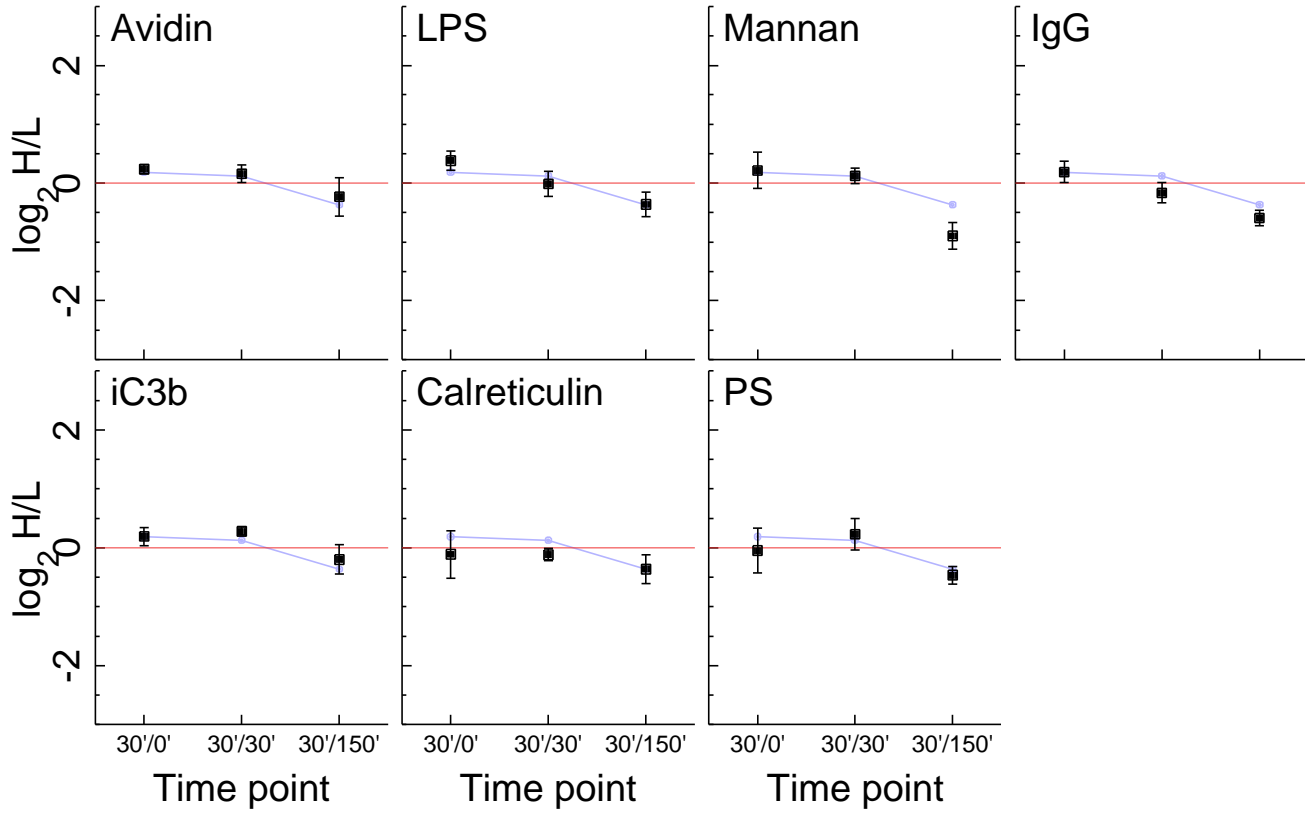



fam26f (Q8C9E8)

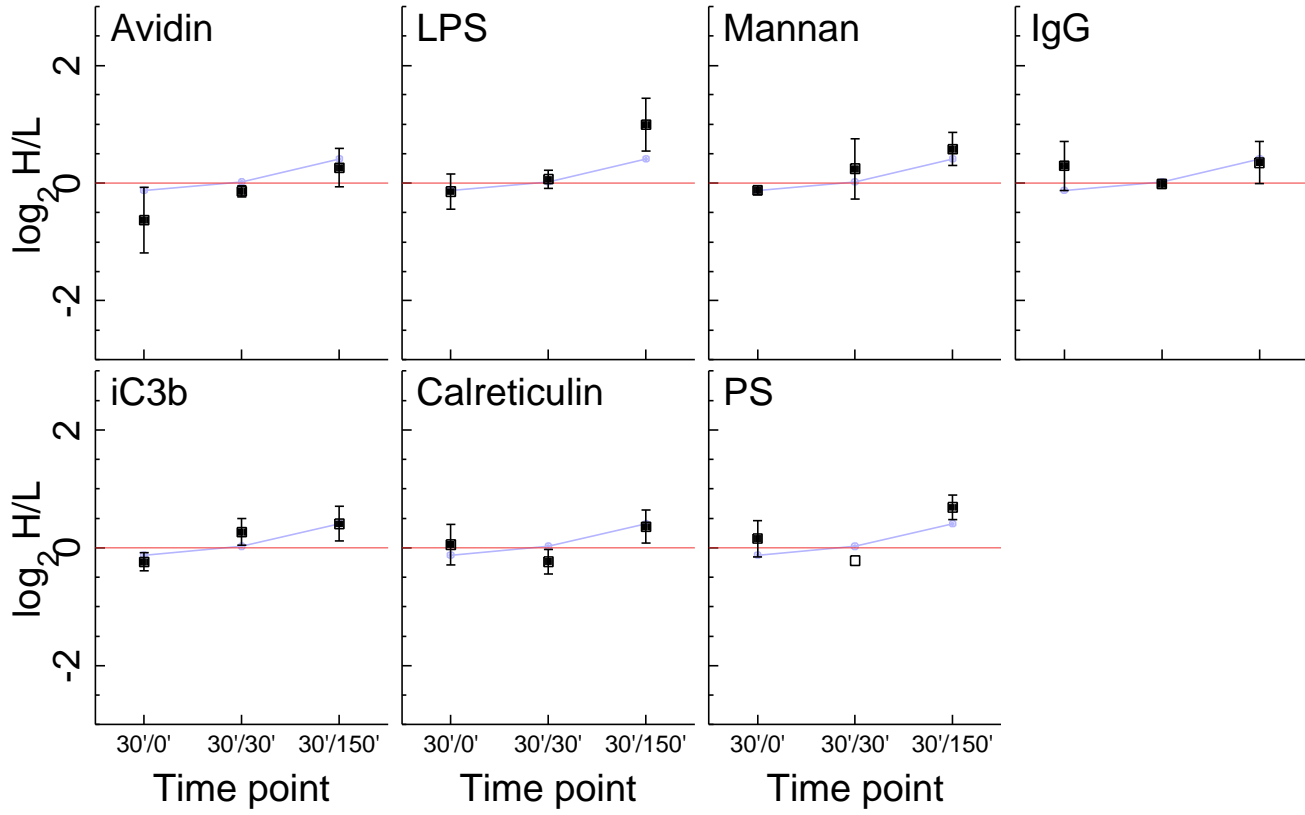

### fam3c (G5E911)

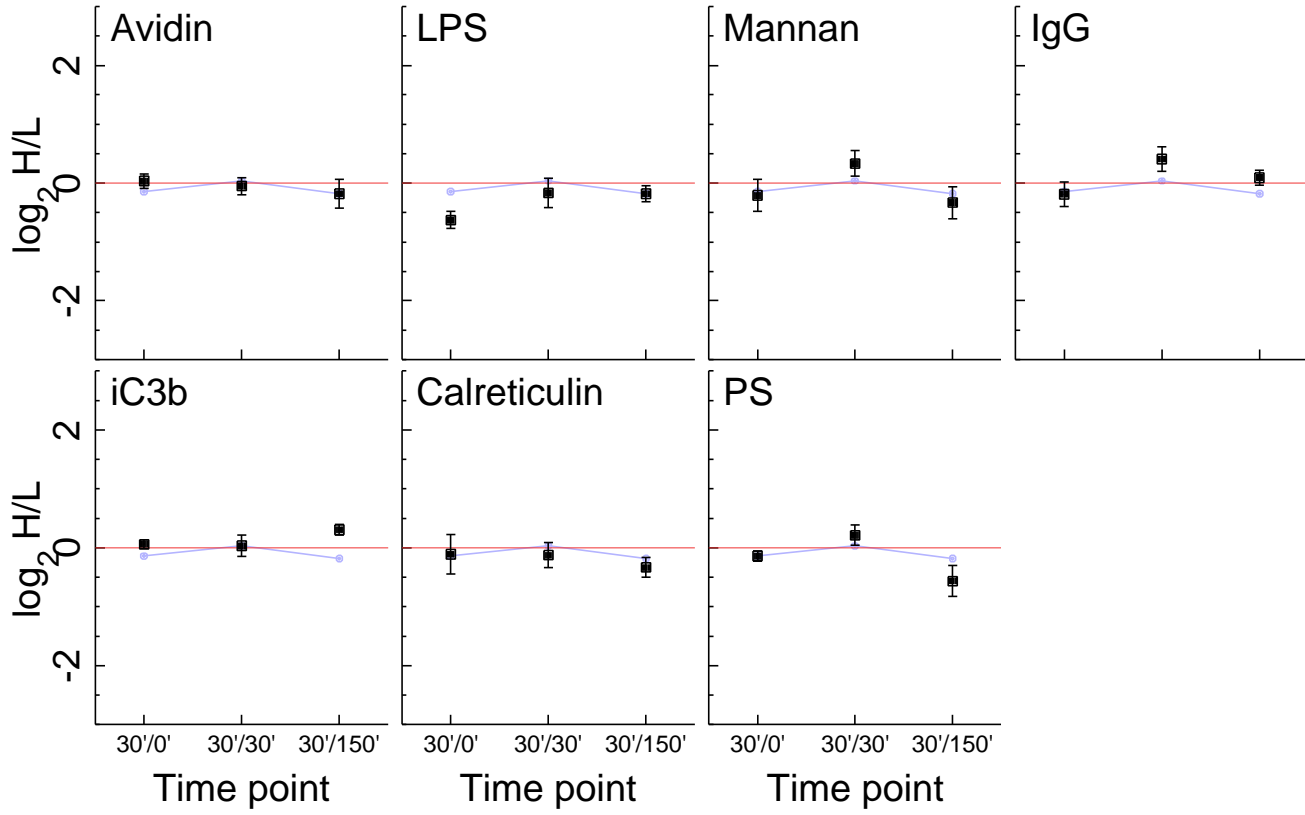

### fam45a (Q9D8N2)

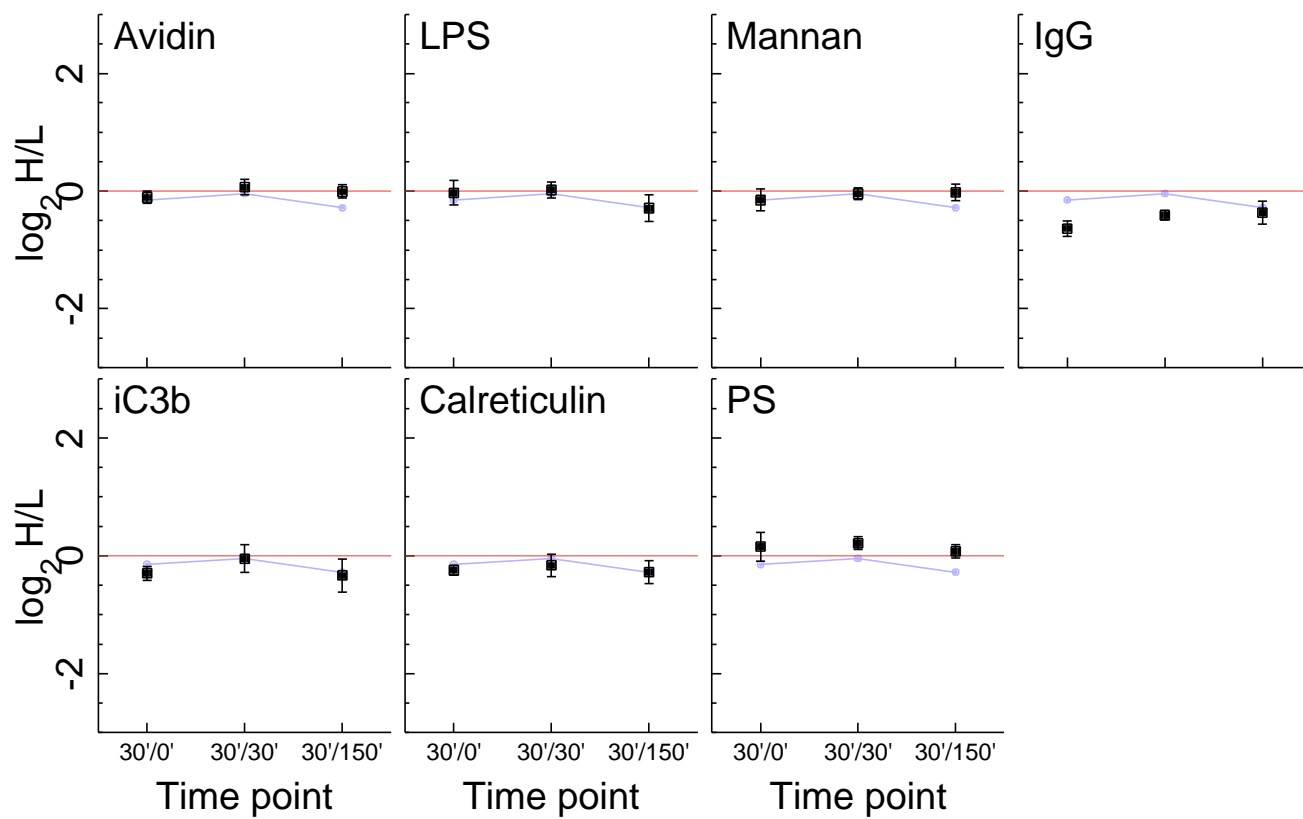

fam49b (Q921M7)

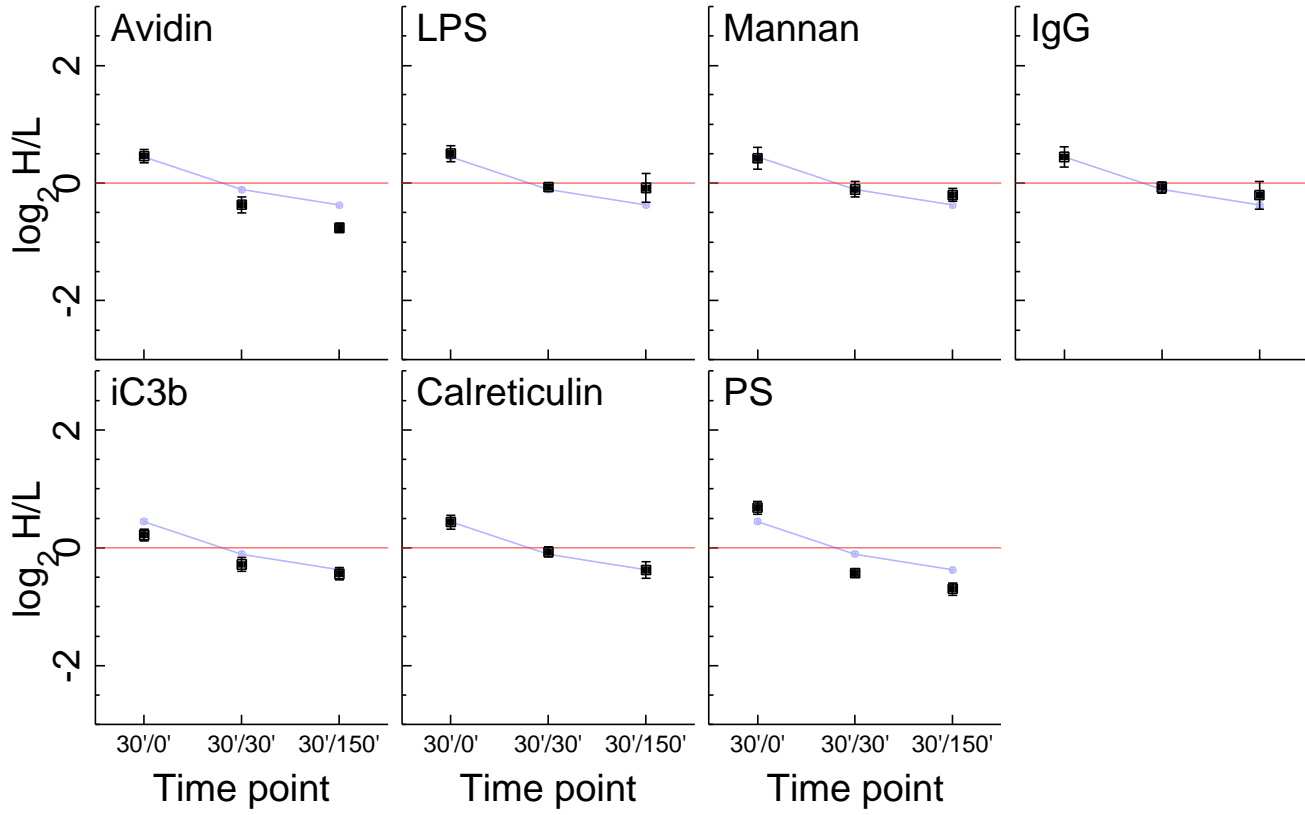

fam50a (Q9WV03)

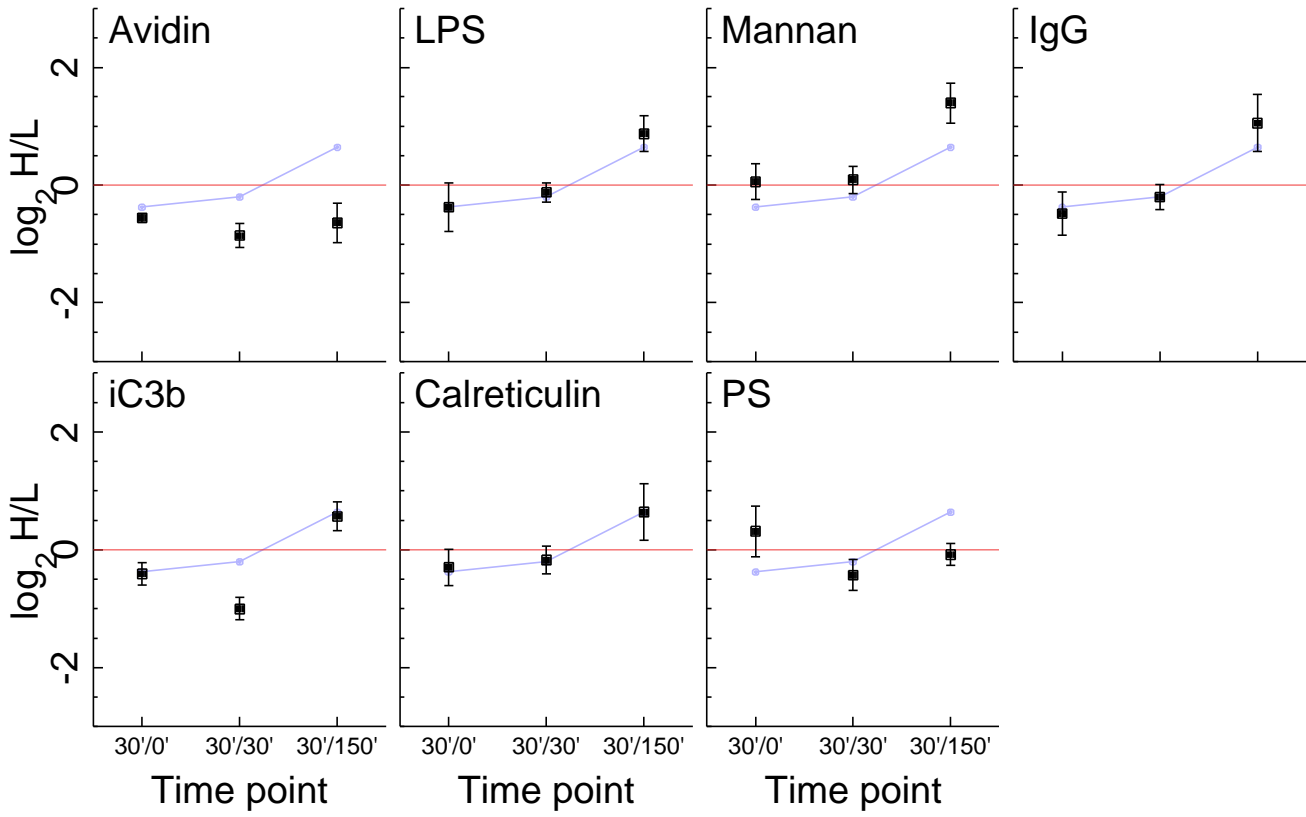

### fam54b (Q9CWE0)

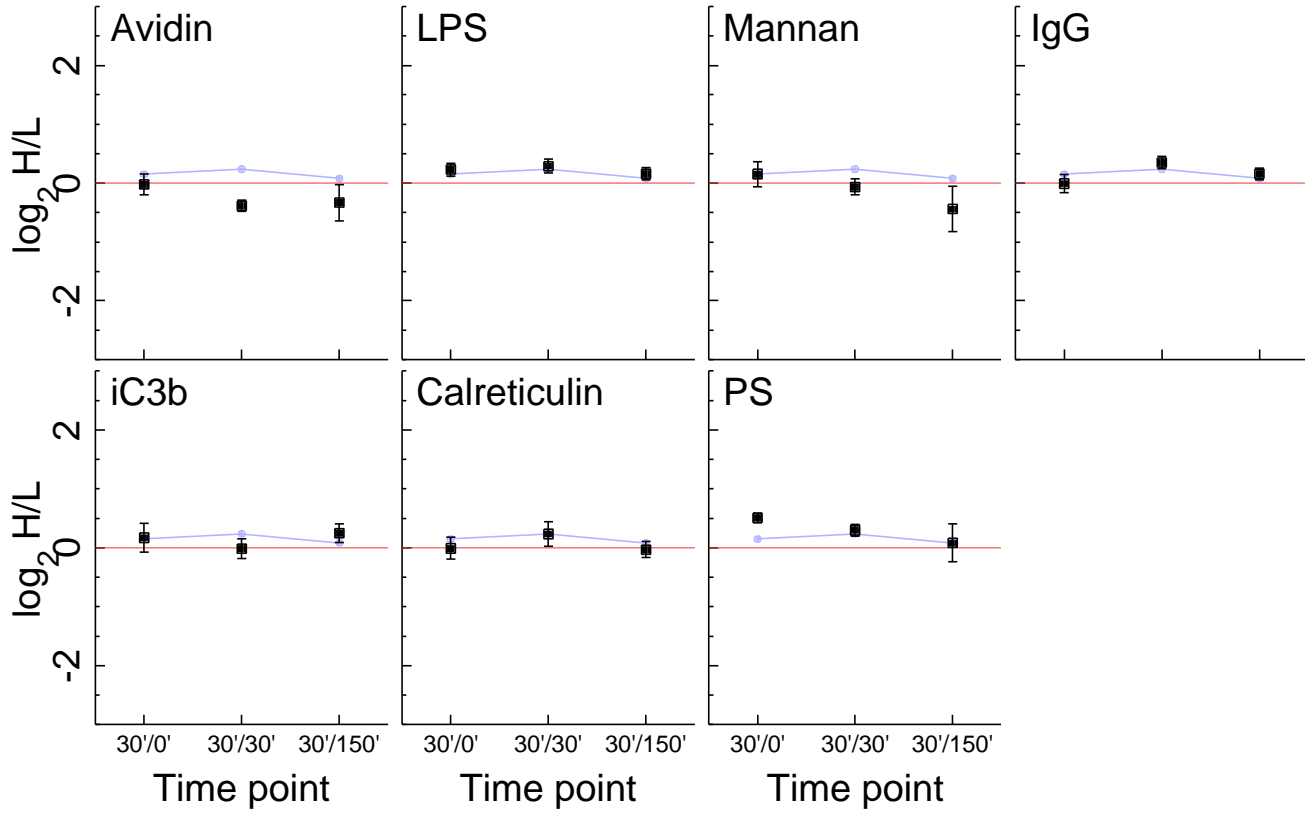

far1 (Q922J9)

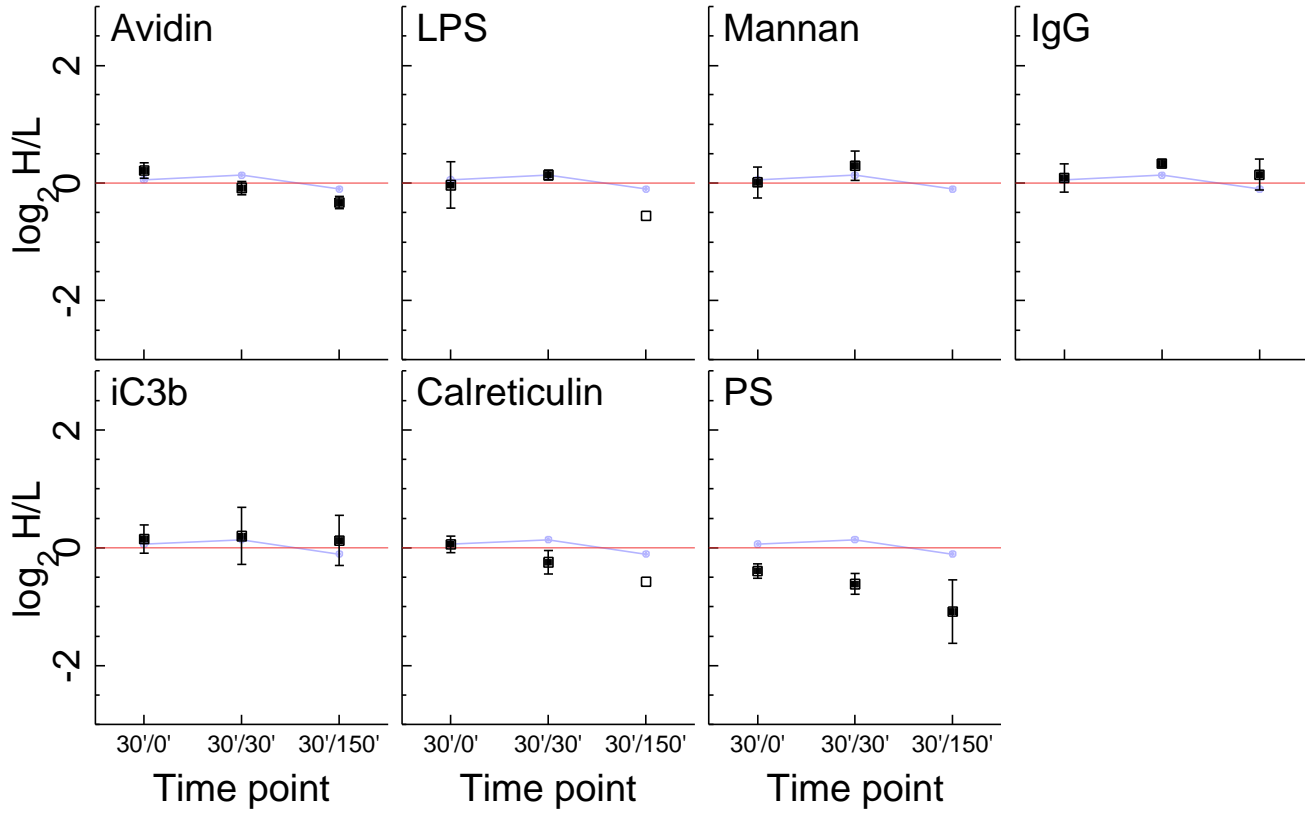

### farsa (Q8C0C7)

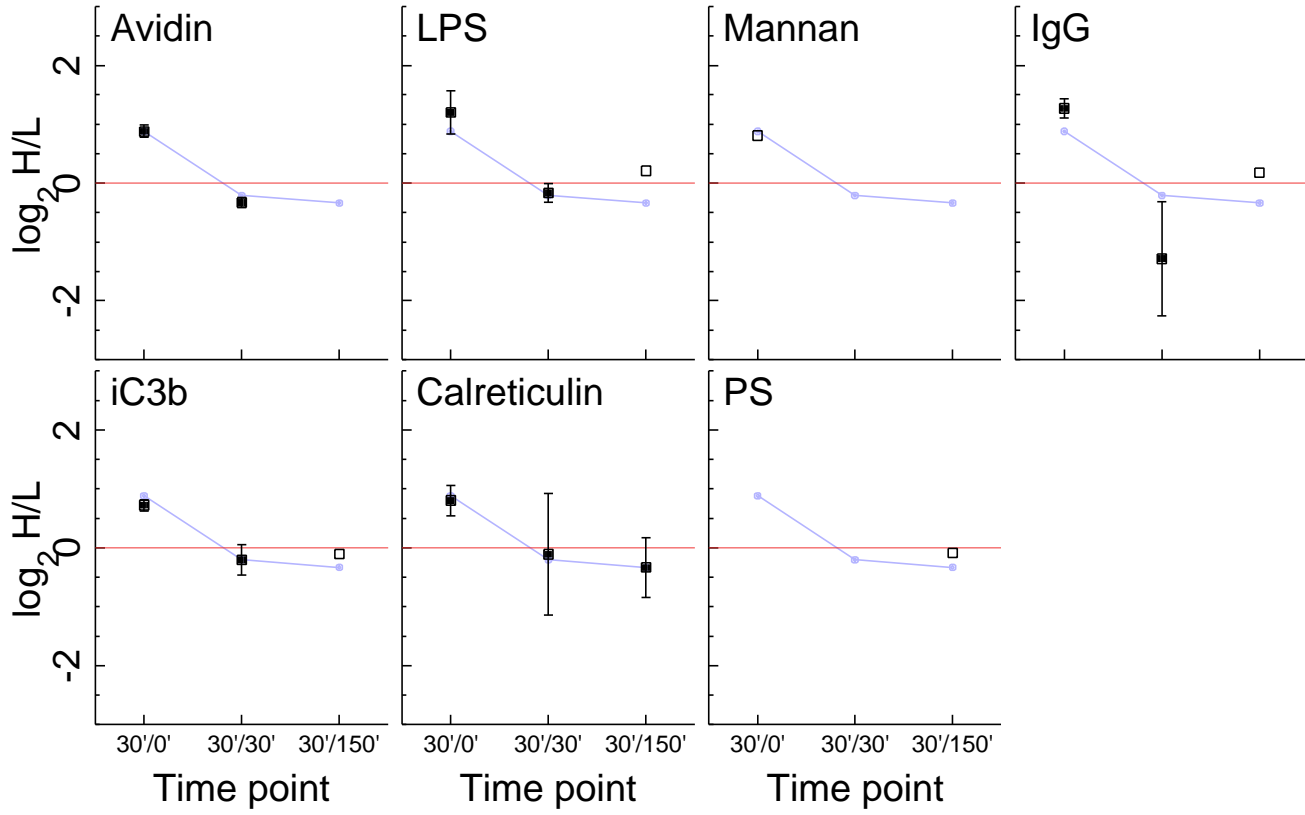



farsb (Q9WUA2)

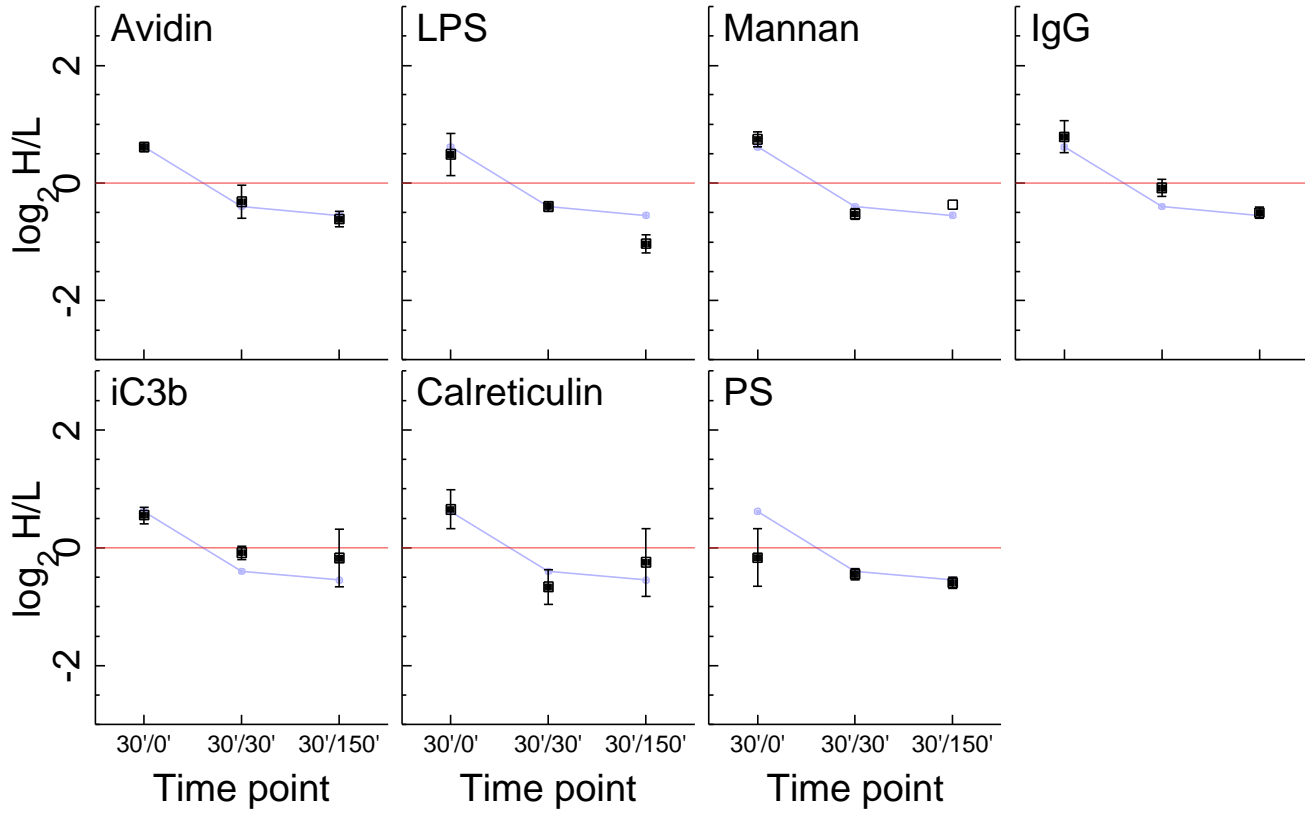

### fbIn2 (P37889)

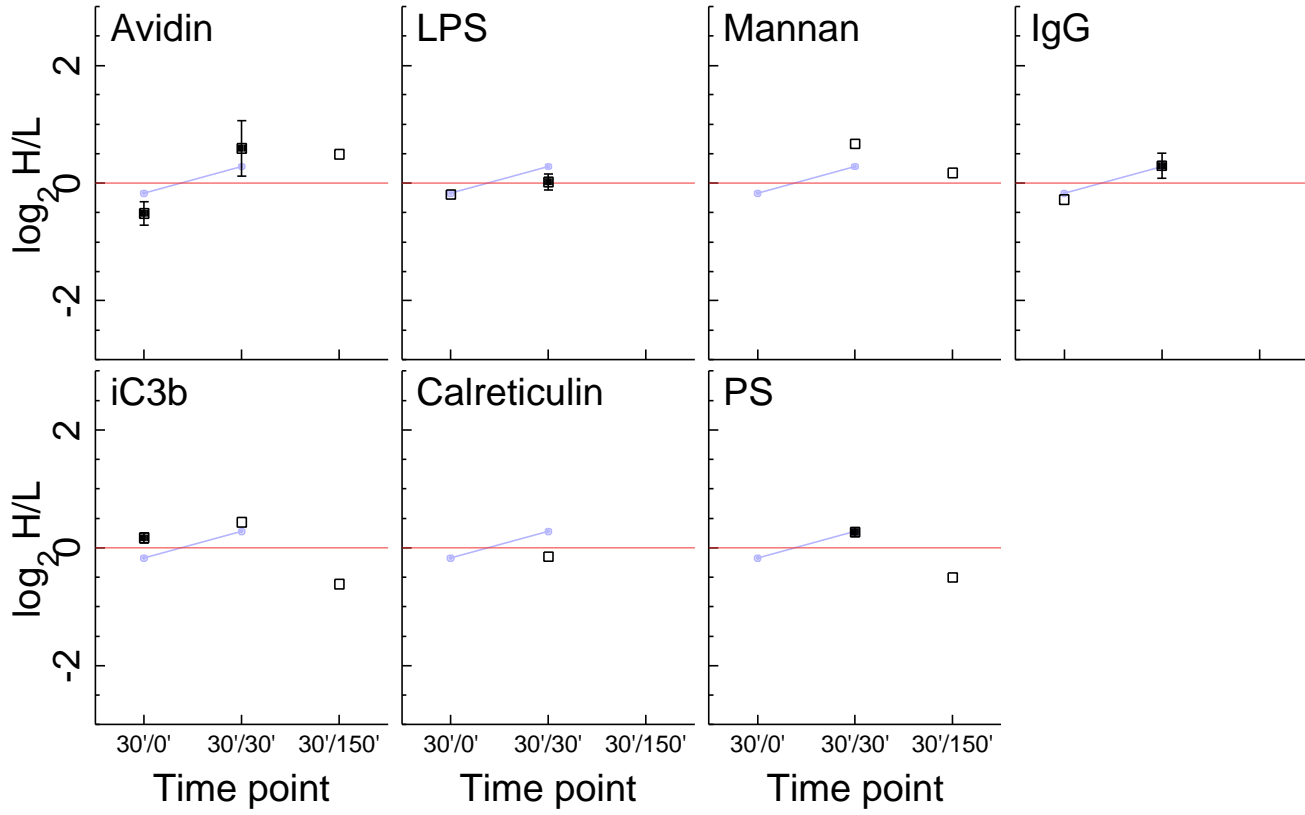

fcgr1g (P20491)

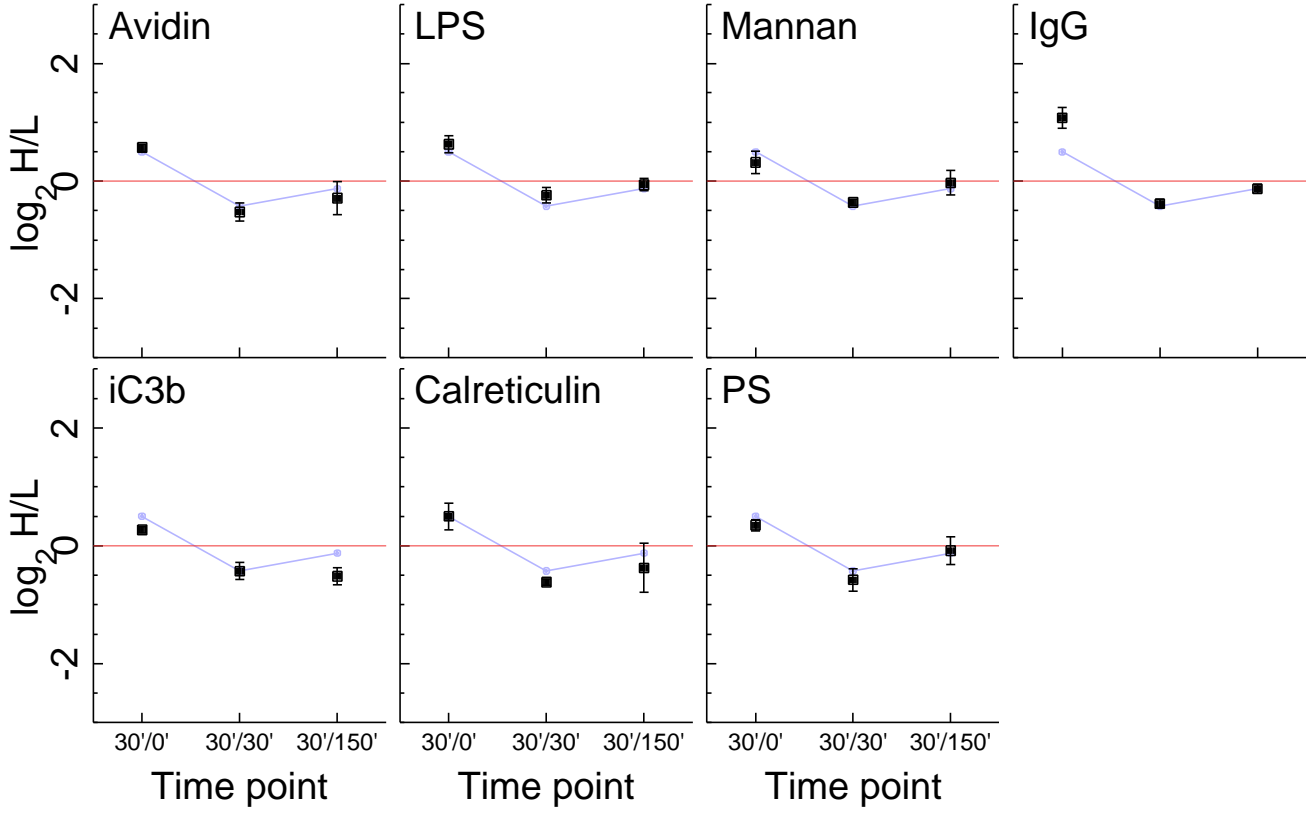

### fcgr1 (P26151)

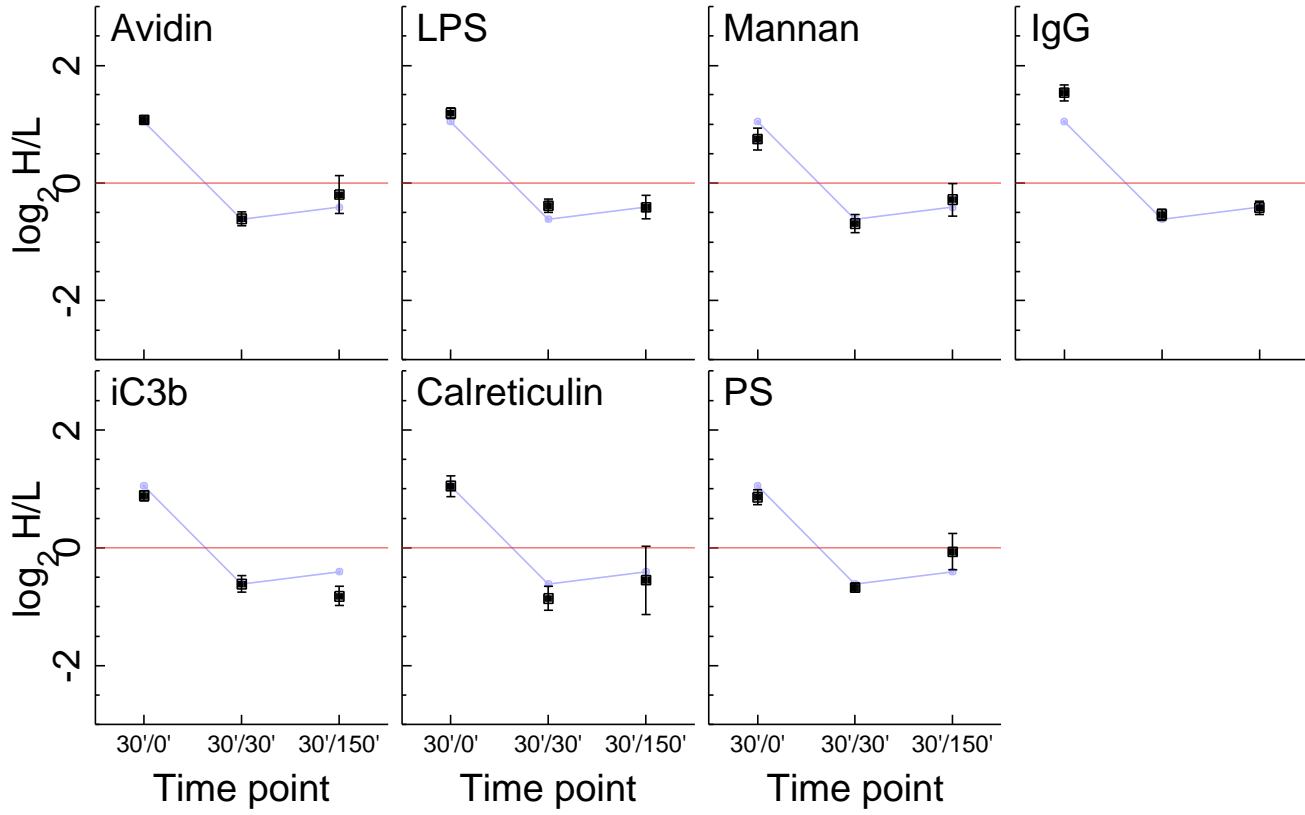

### fcgr2 (P08101)

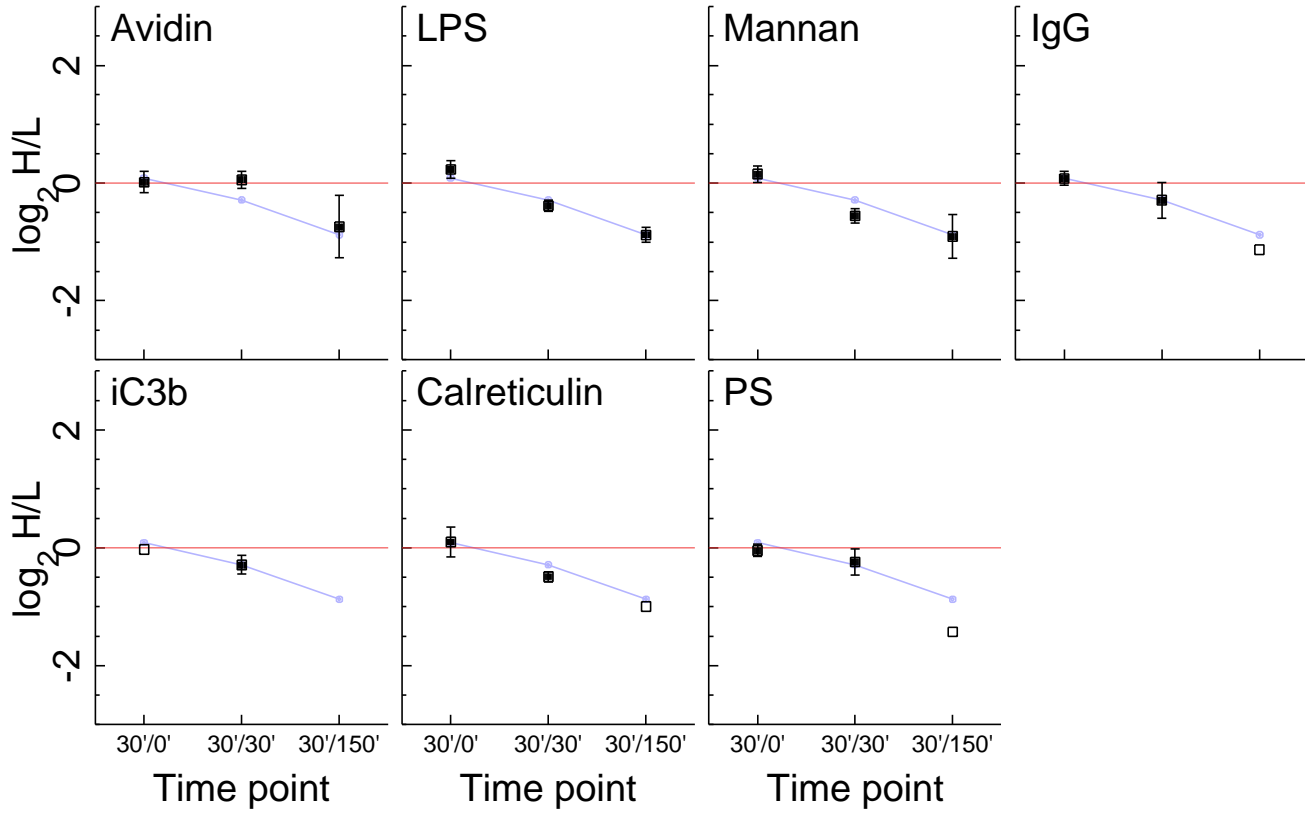

### fcgr3:1 (E9PUV2)

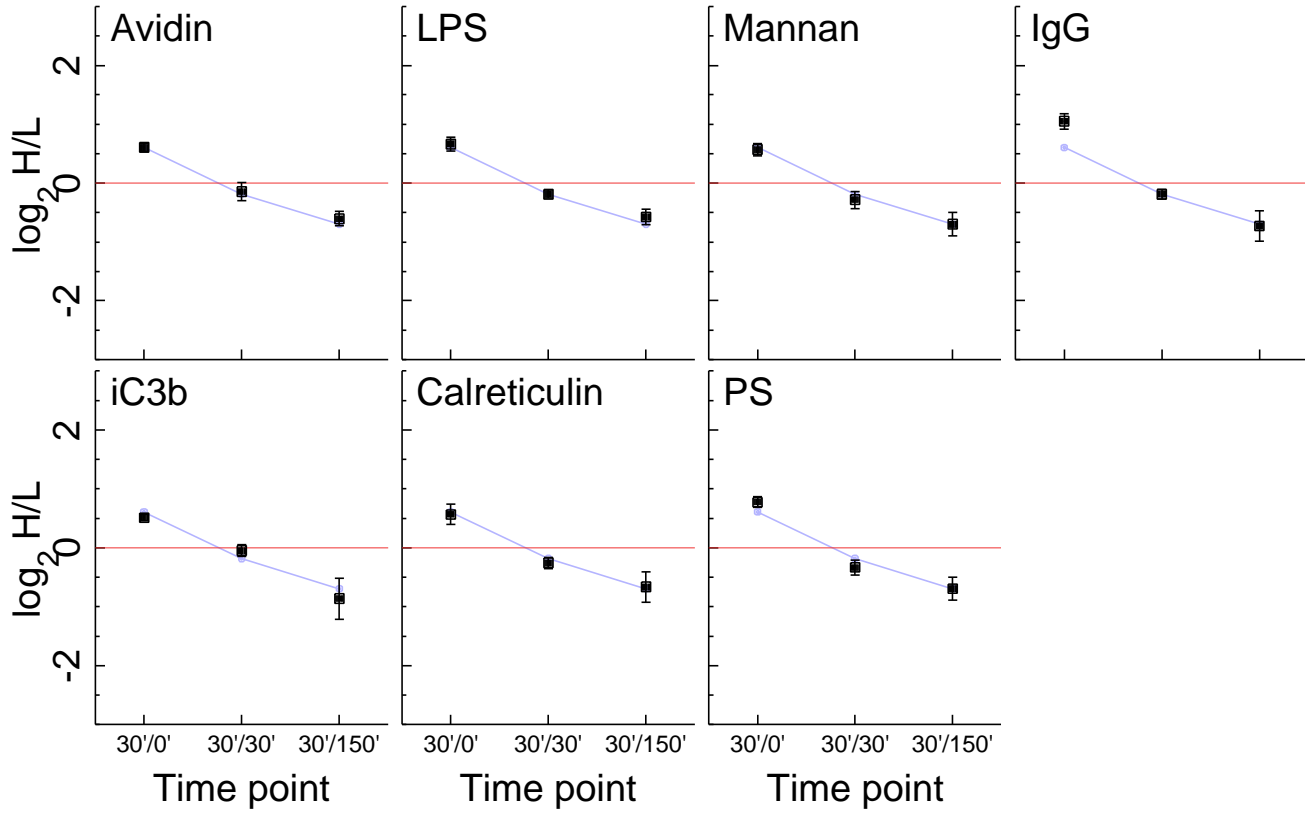

fcgr3:2 (P08508)

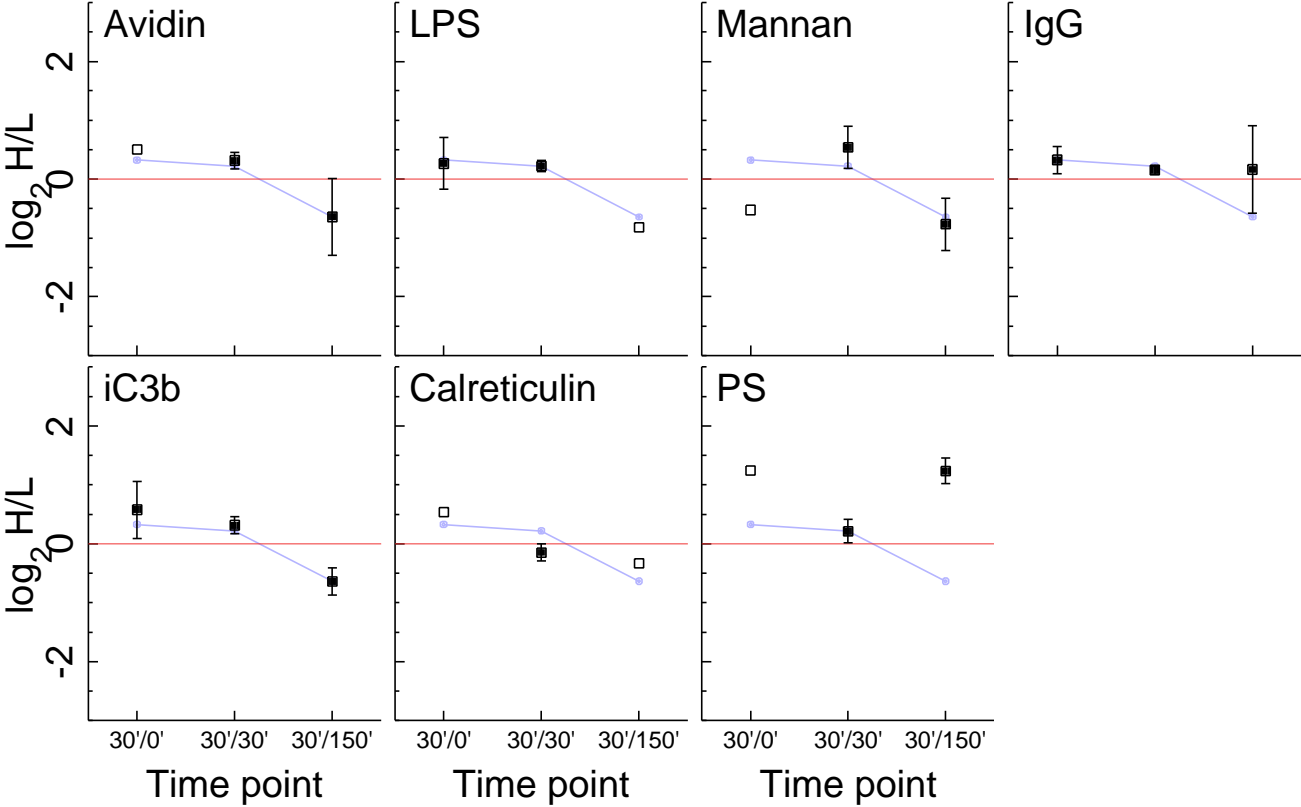

### fcgrt (Q61559)

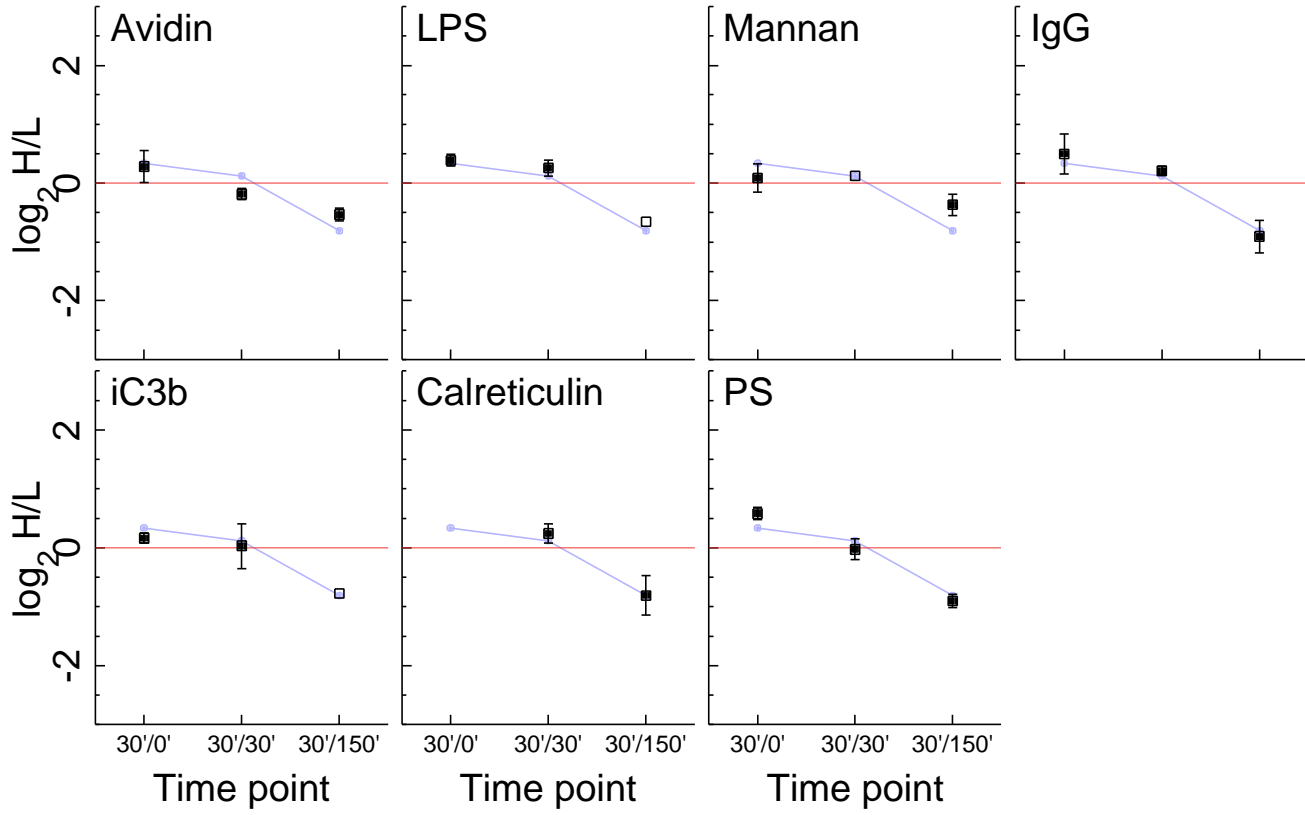



fcrls (Q9EQY5)

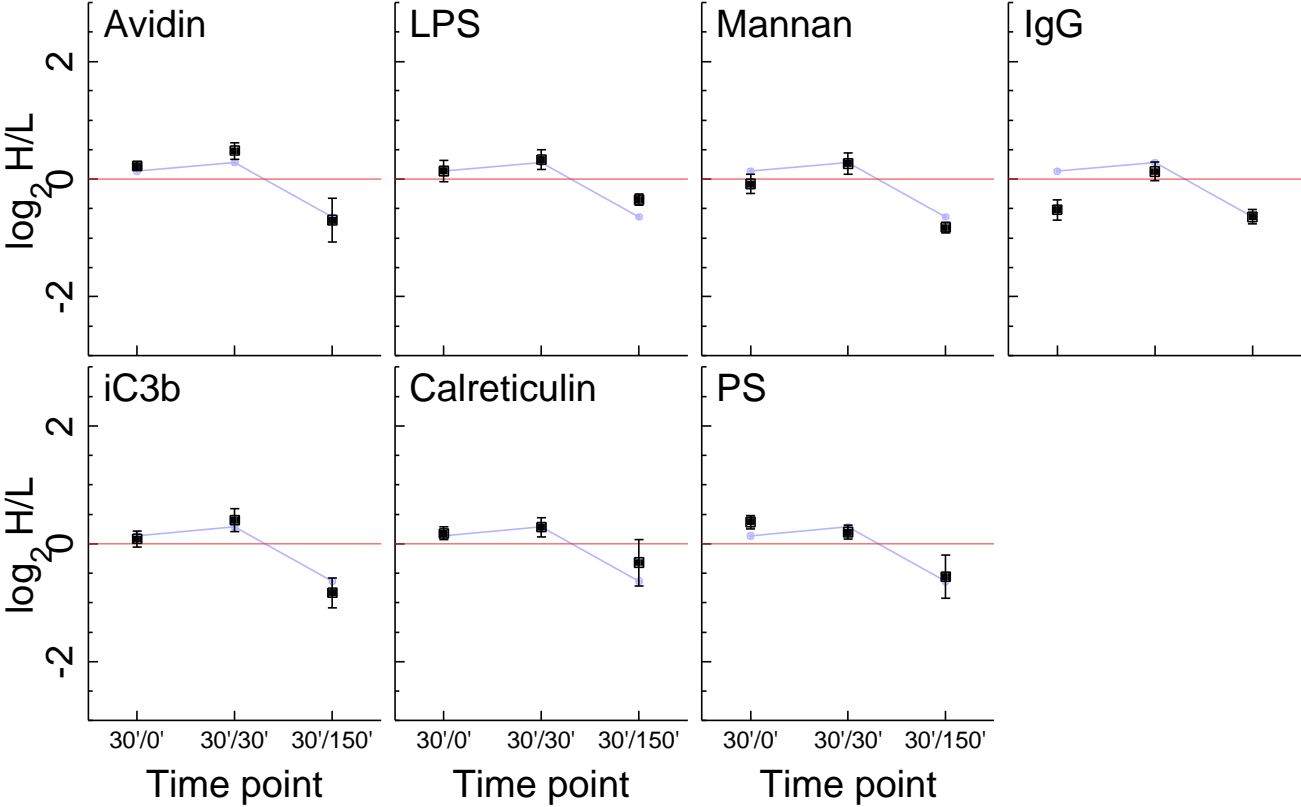

### fdps (Q920E5)

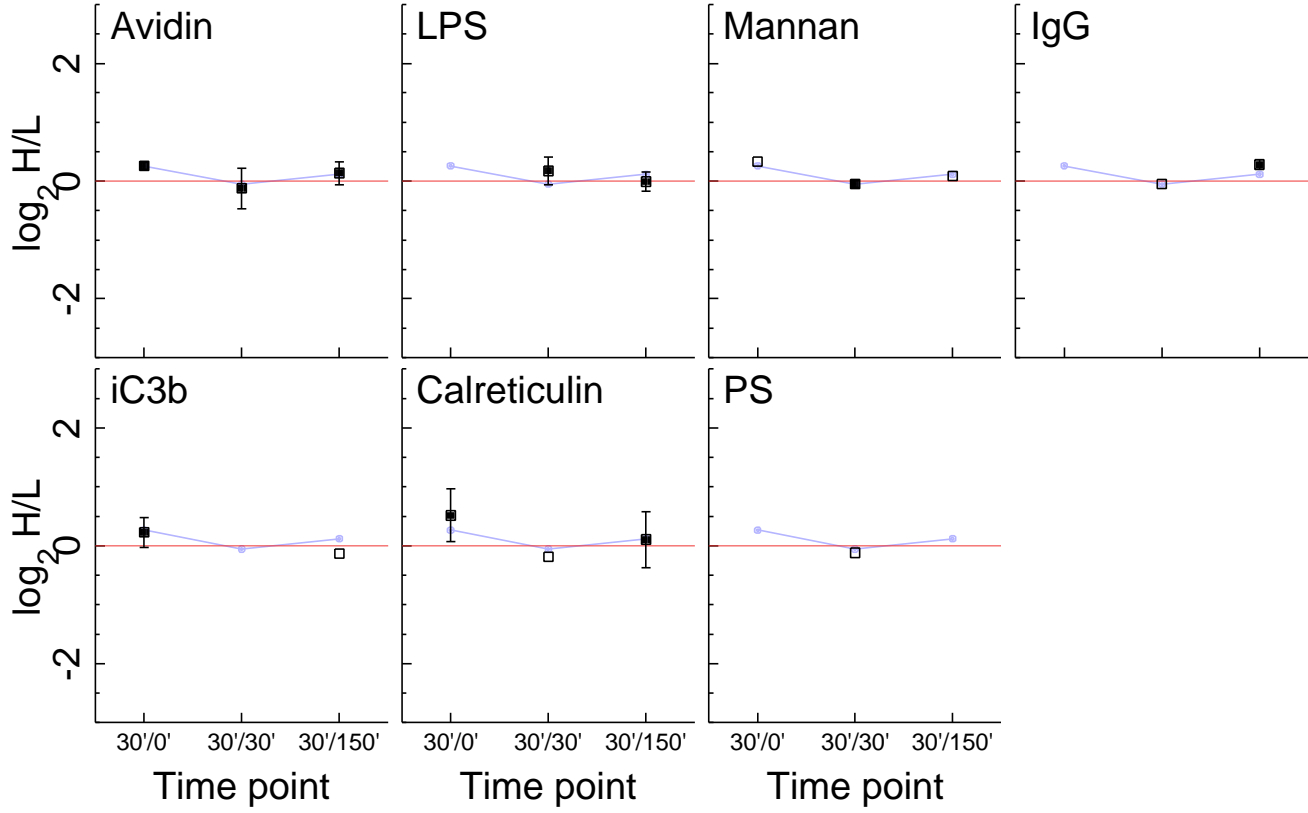

fen1 (Q91Z50)

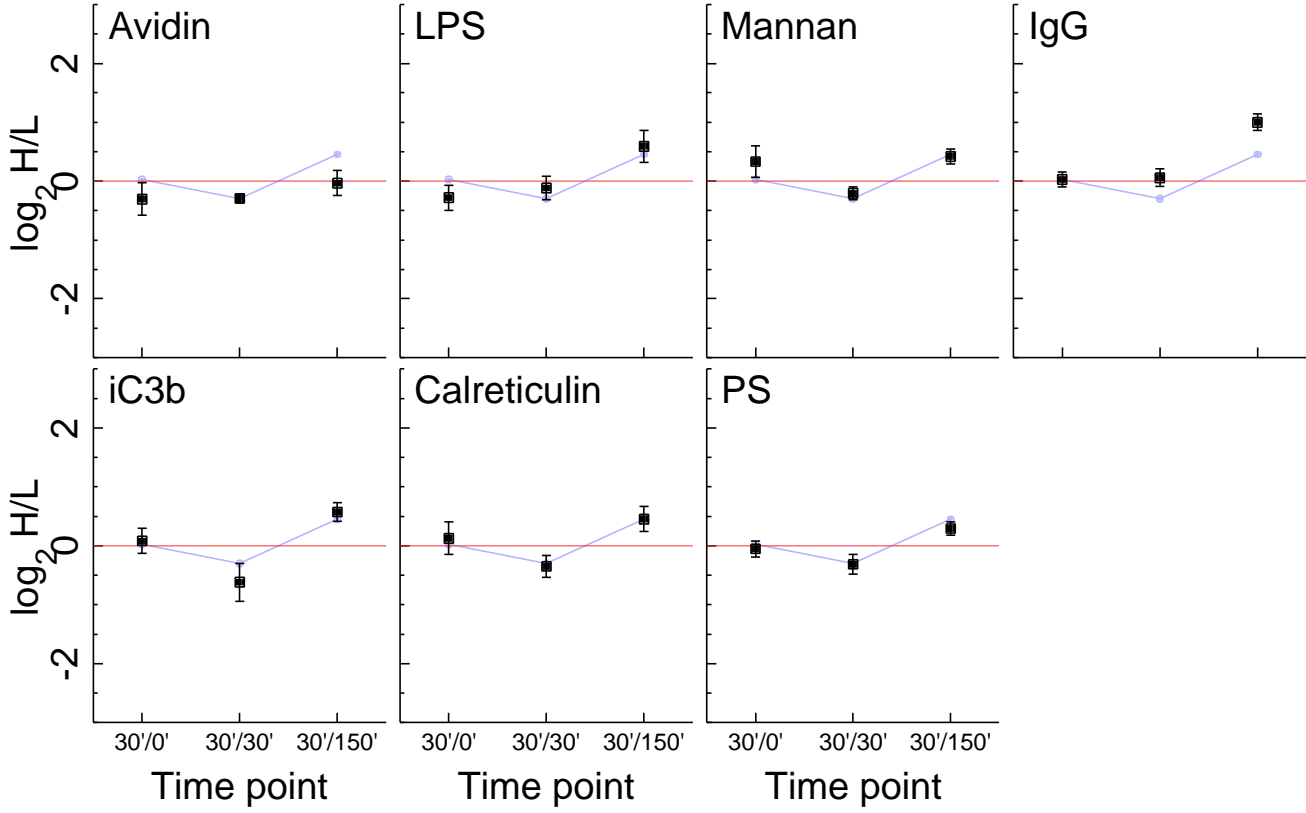

fermt3 (Q8K1B8)

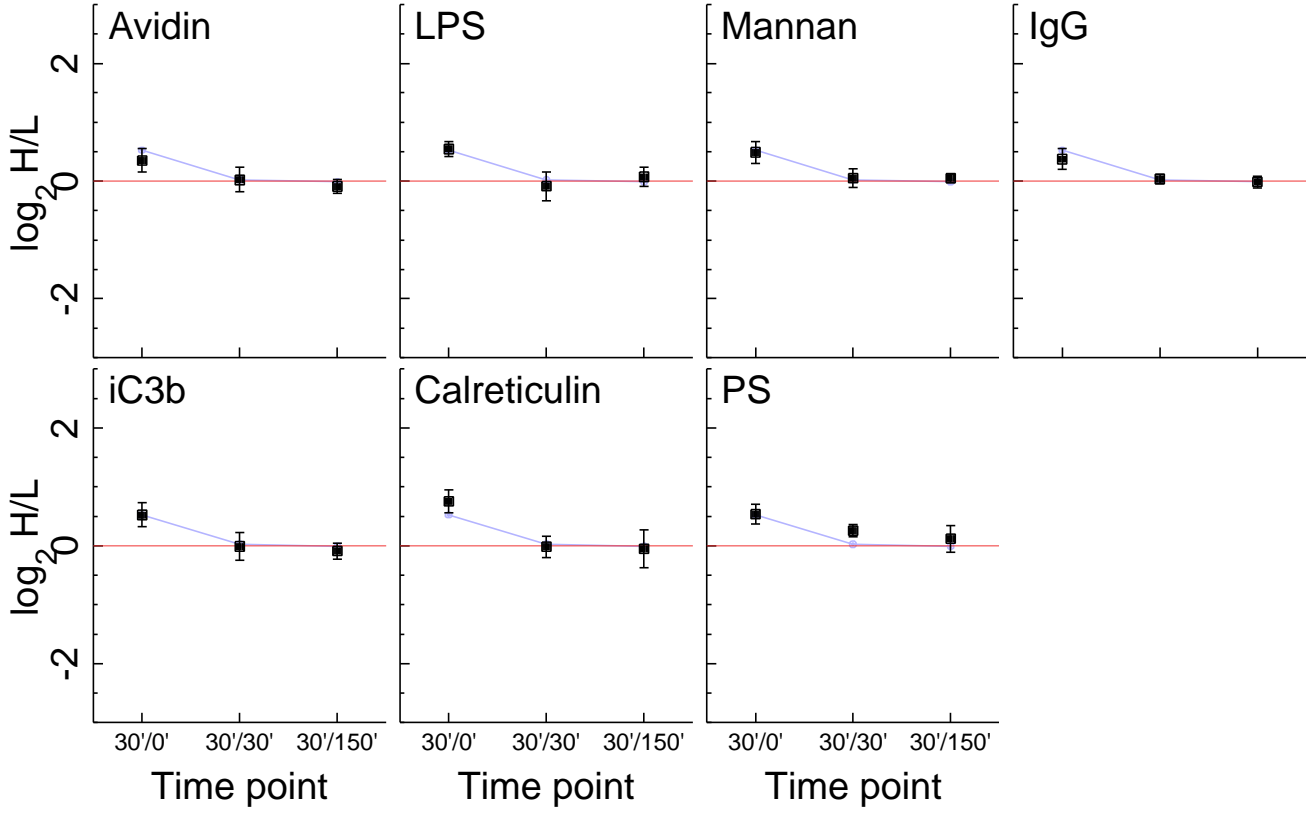

fes (P16879)

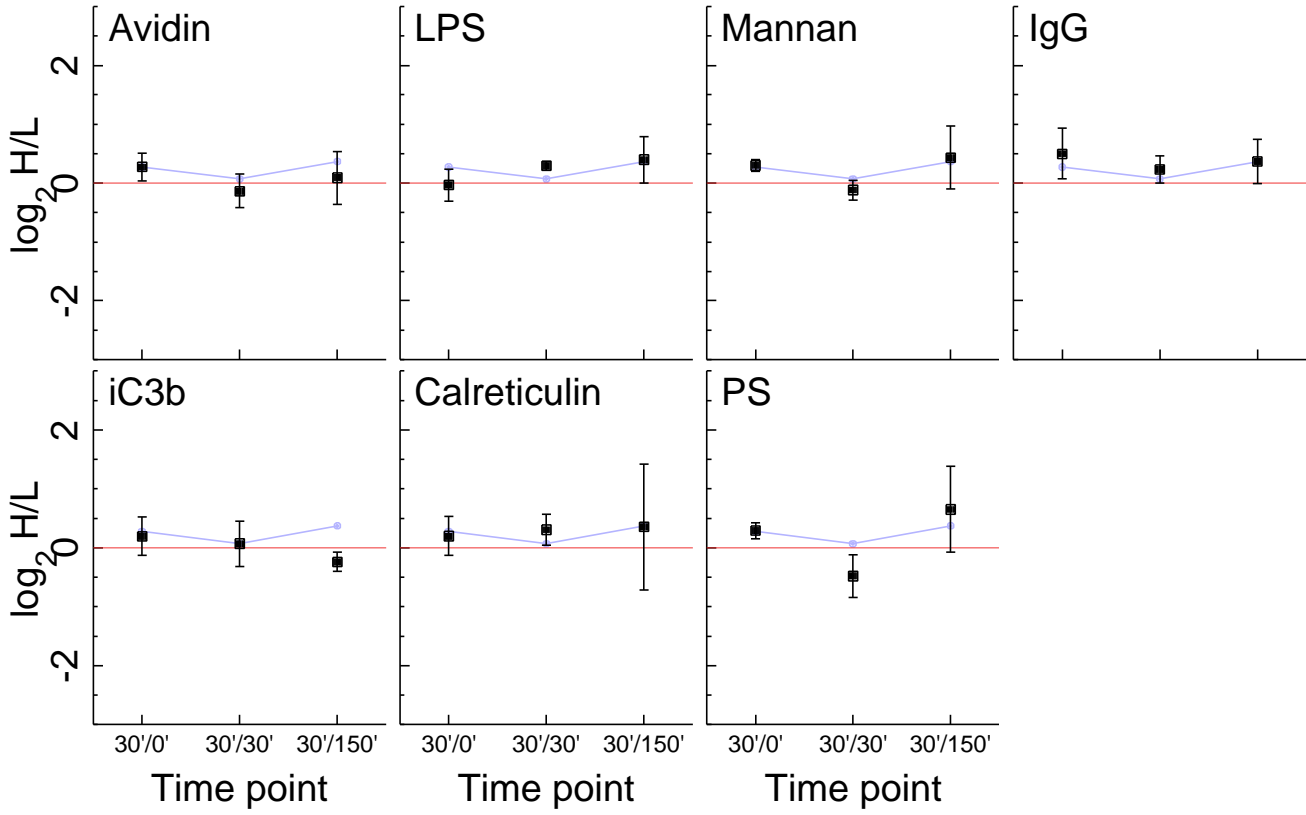

fh (P97807)

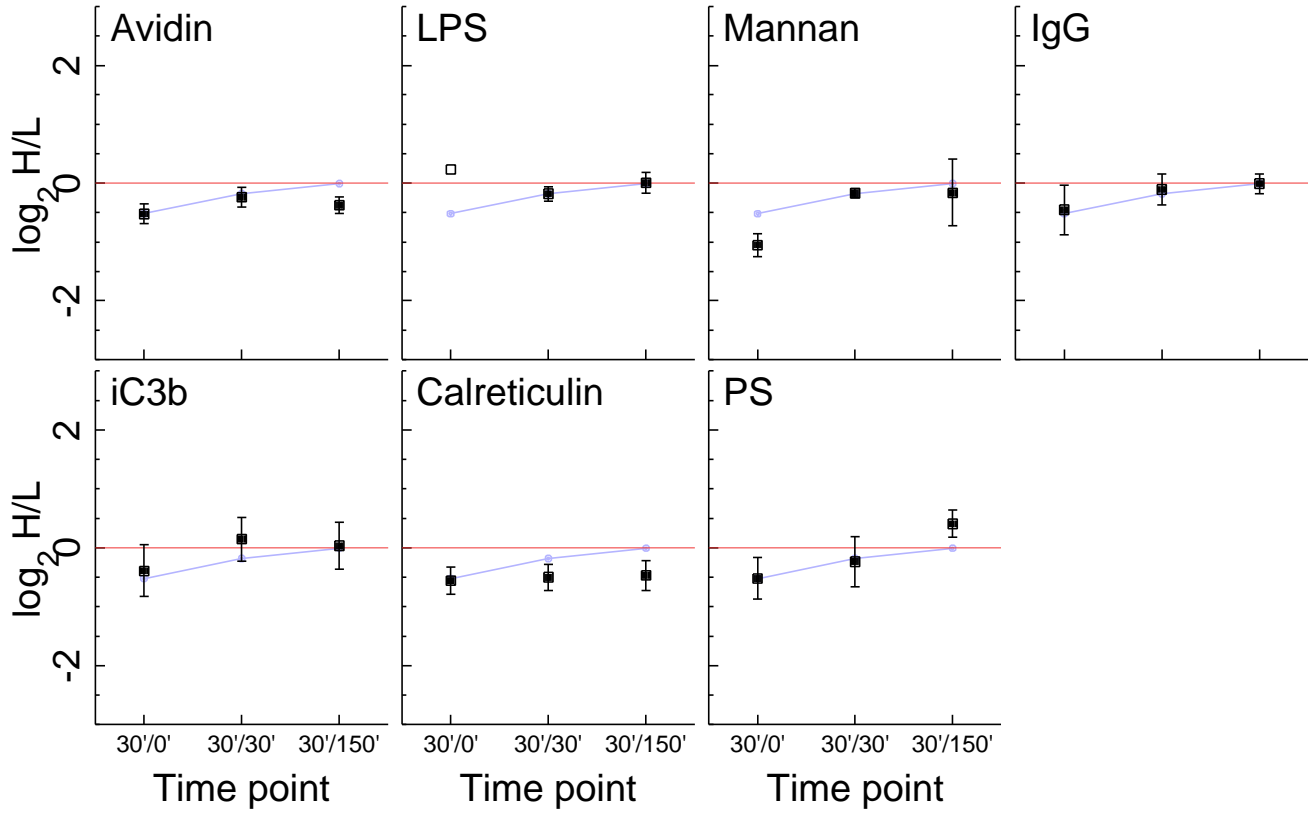

### fis1 (Q9CQ92)

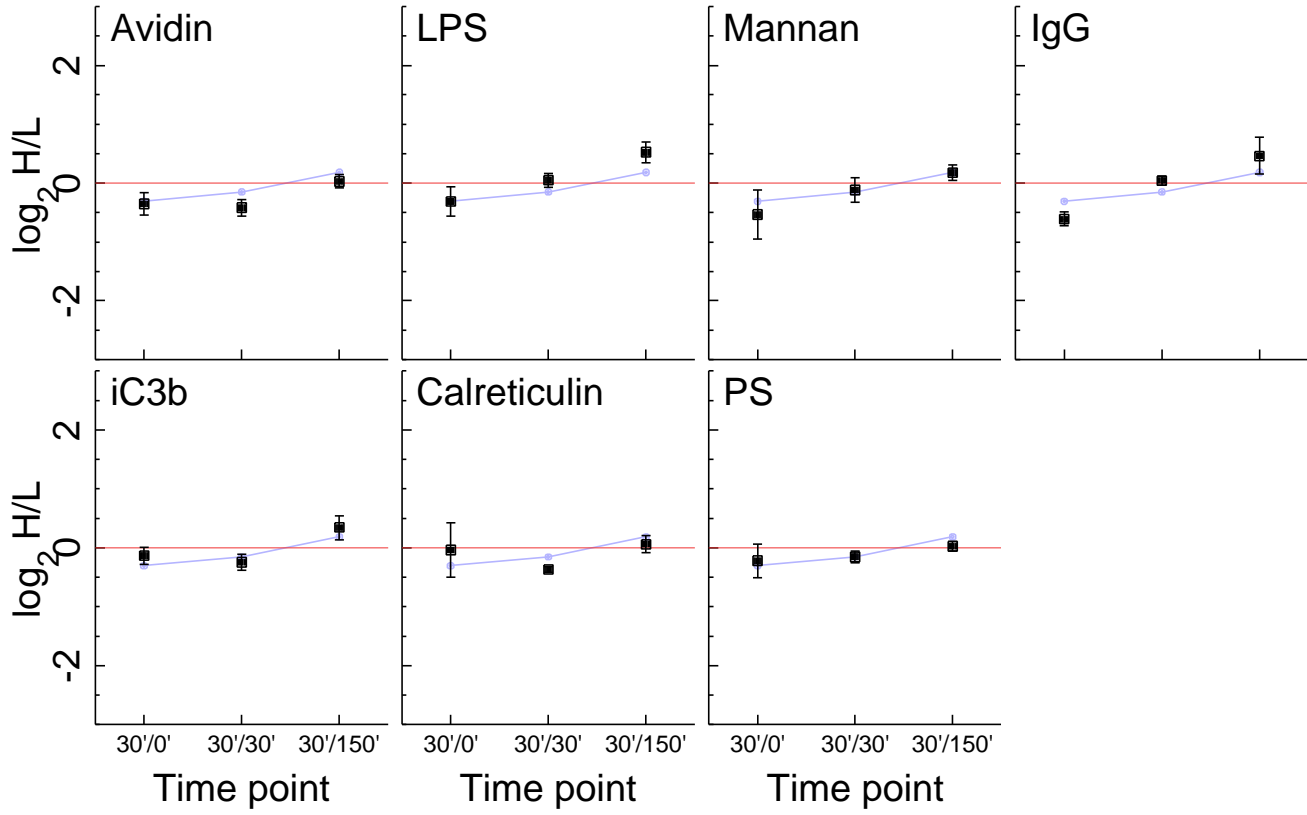

### fkbp15 (Q6P9Q6)

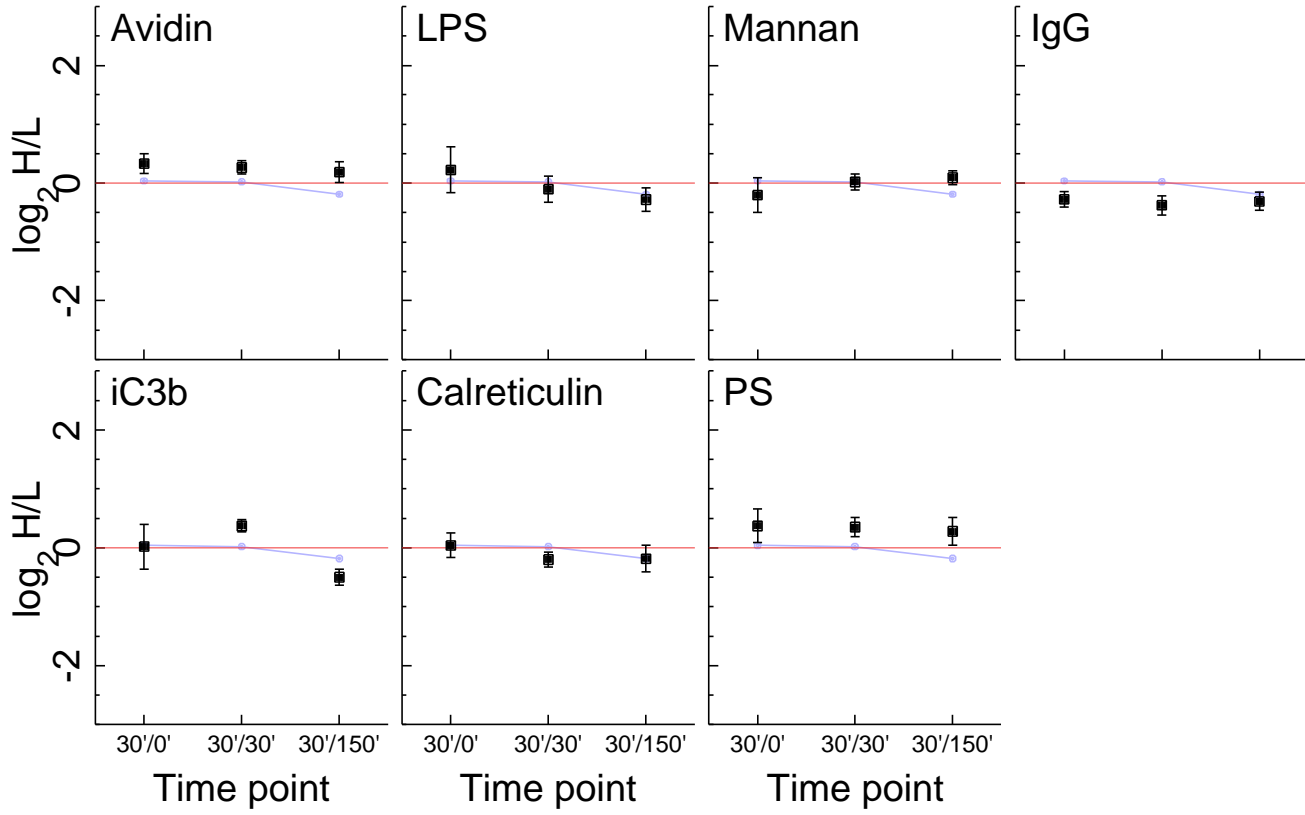



fkbp1a (P26883)

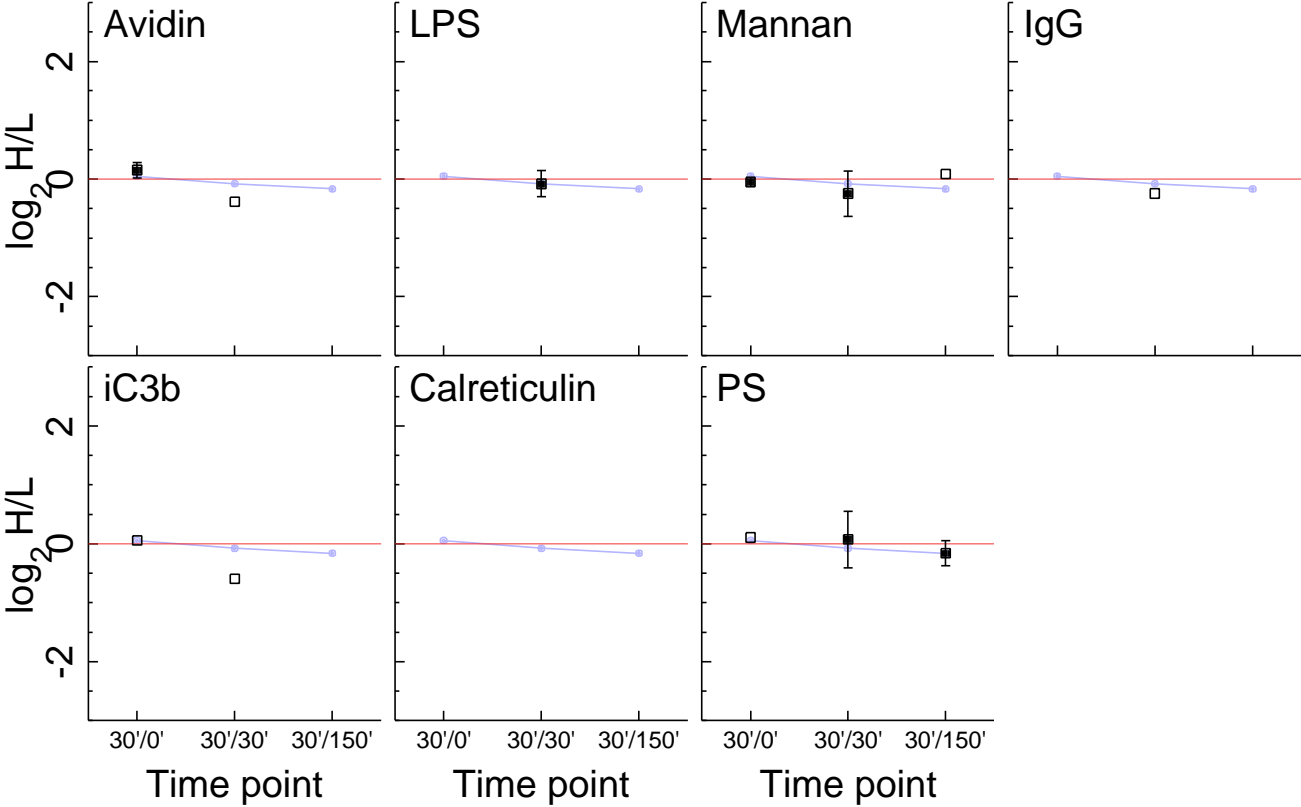

### fkbp2 (P45878)

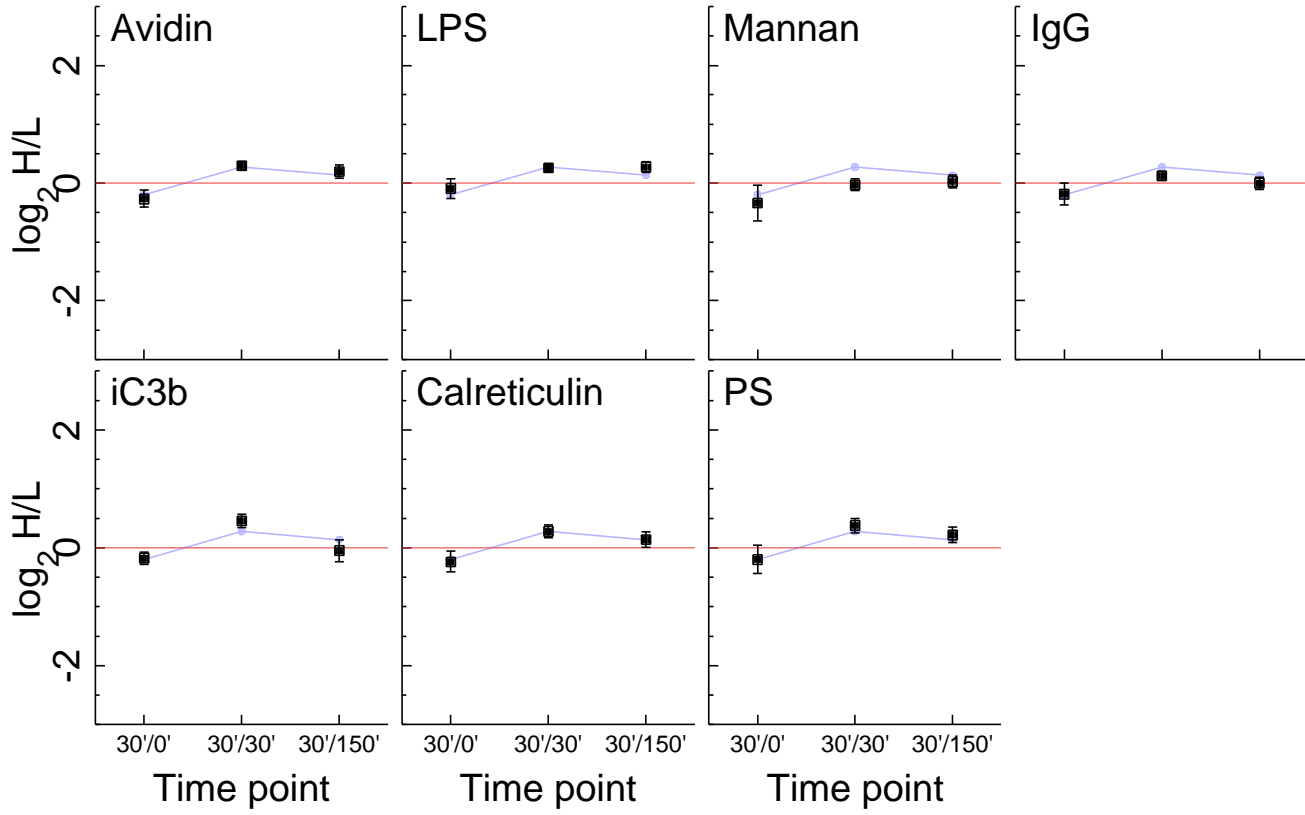

### fkbp8 (O35465)

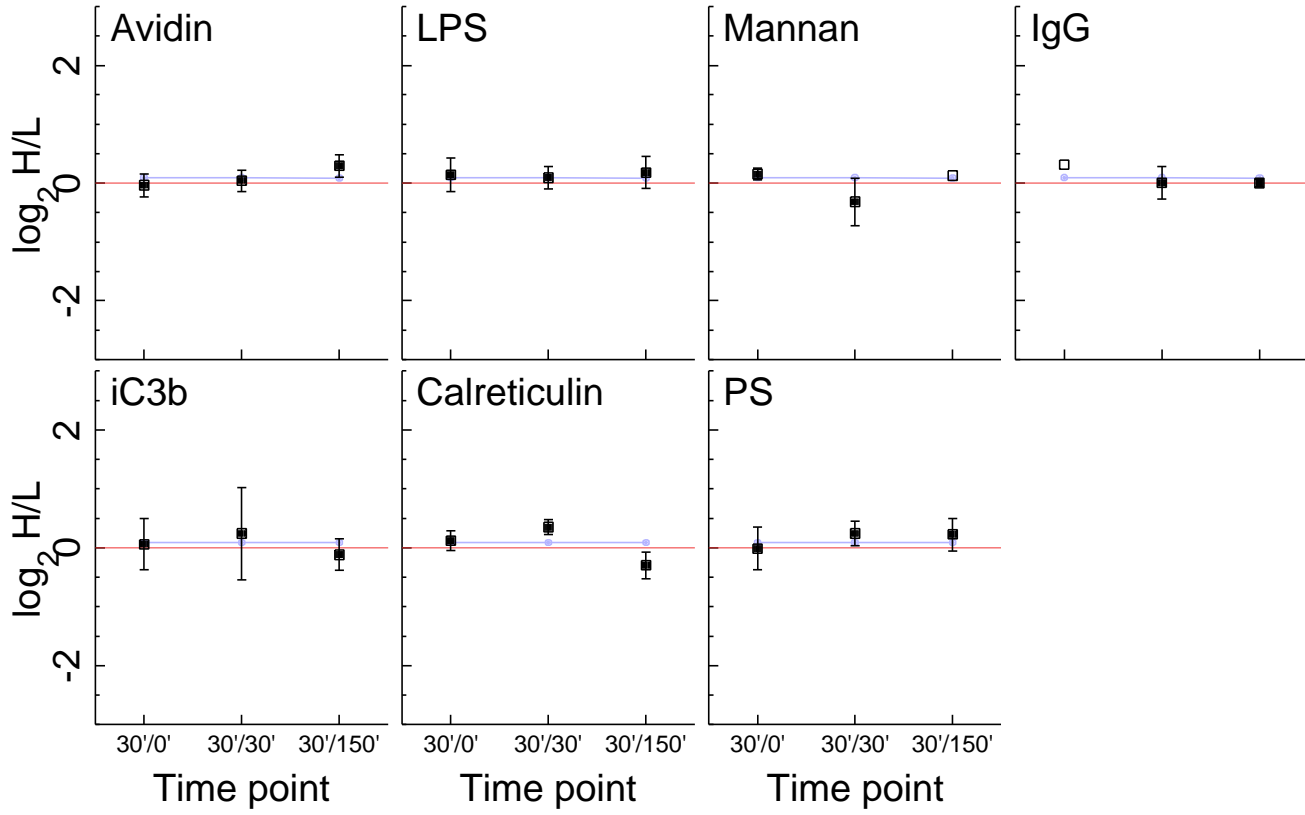

flcn (Q8QZS3)

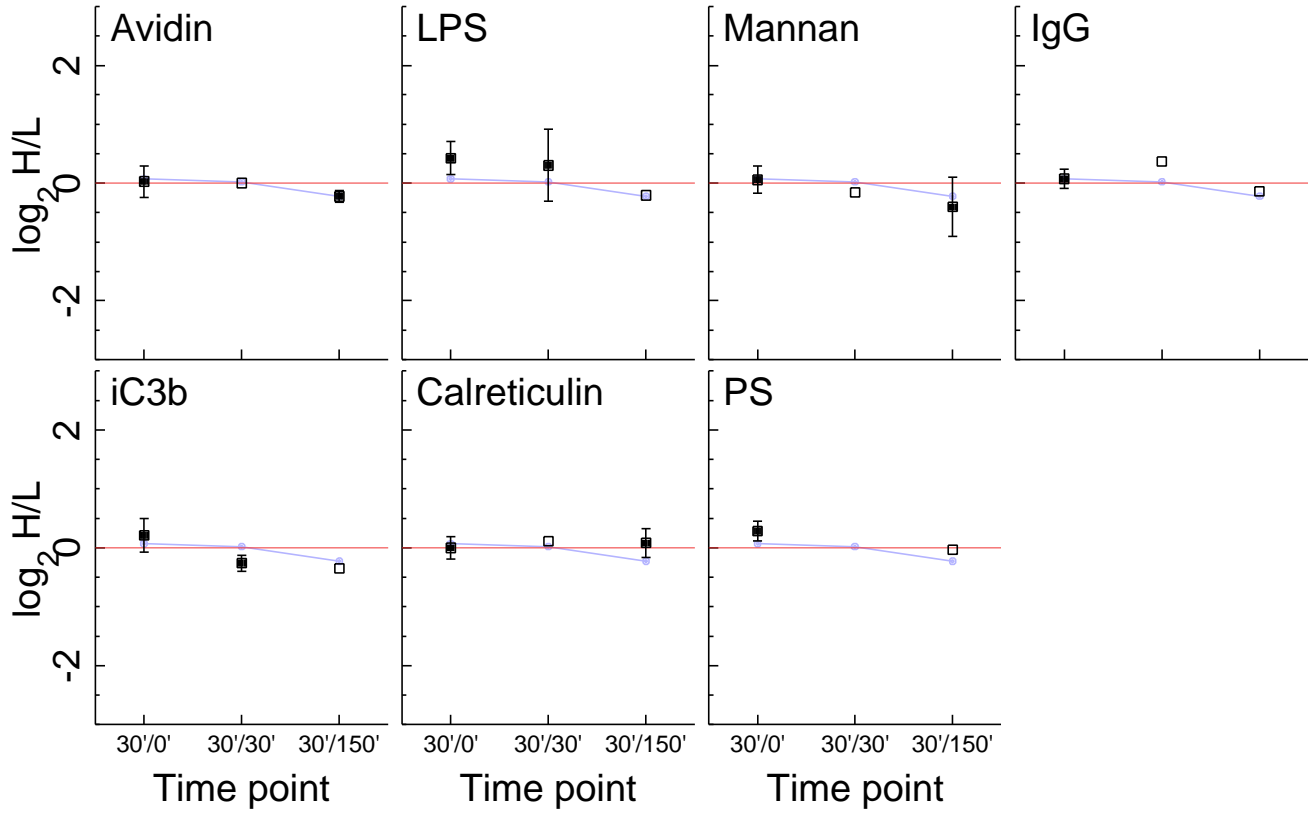

# f1na (Q8BTM8)

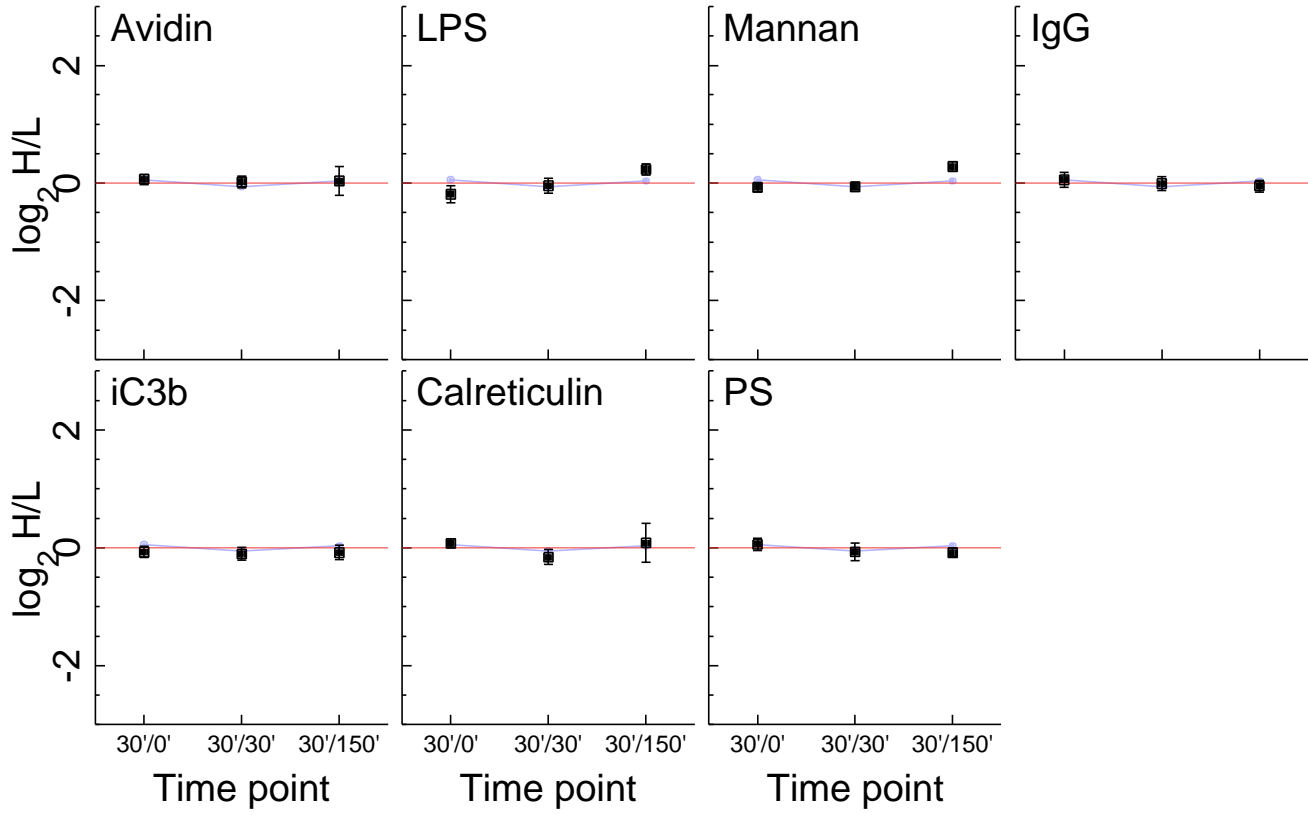

fInc (D3Z576)

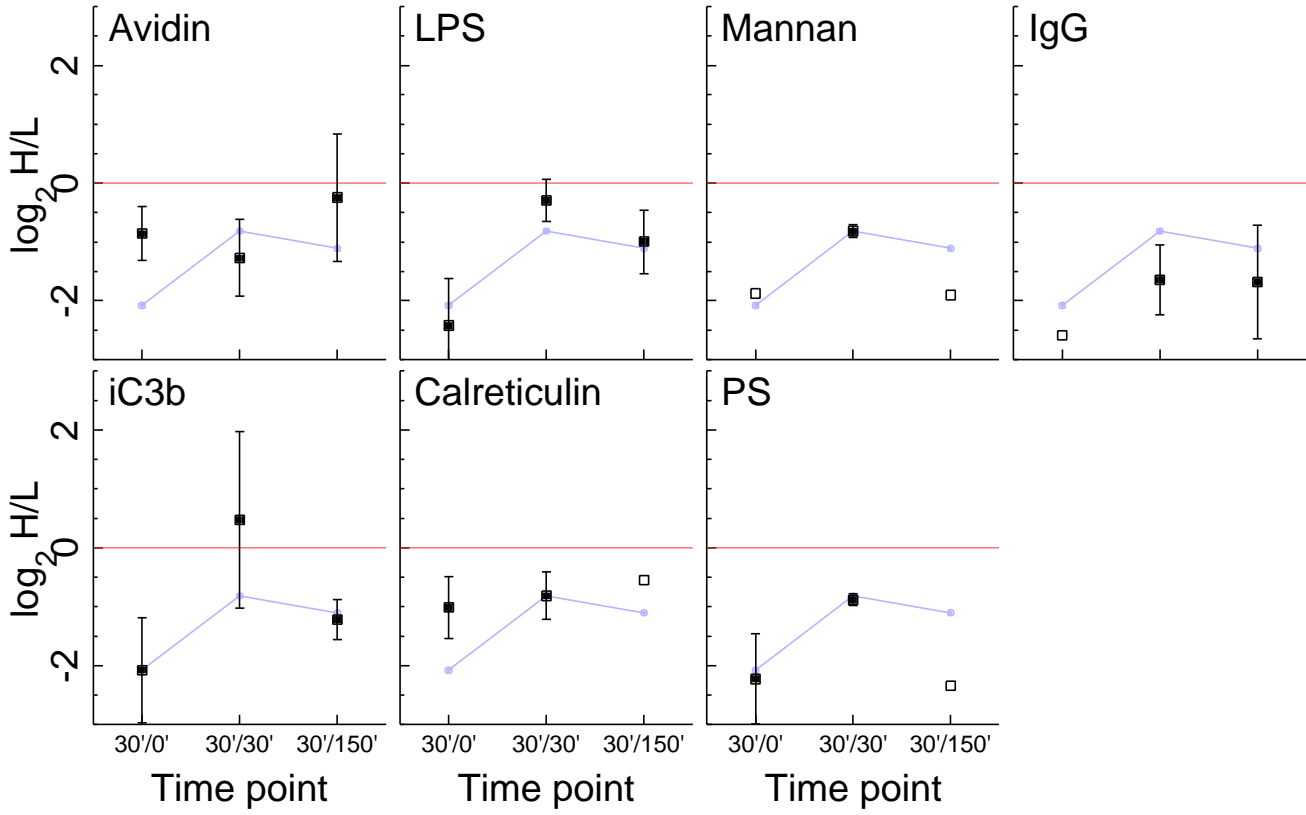

flot1 (O08917)

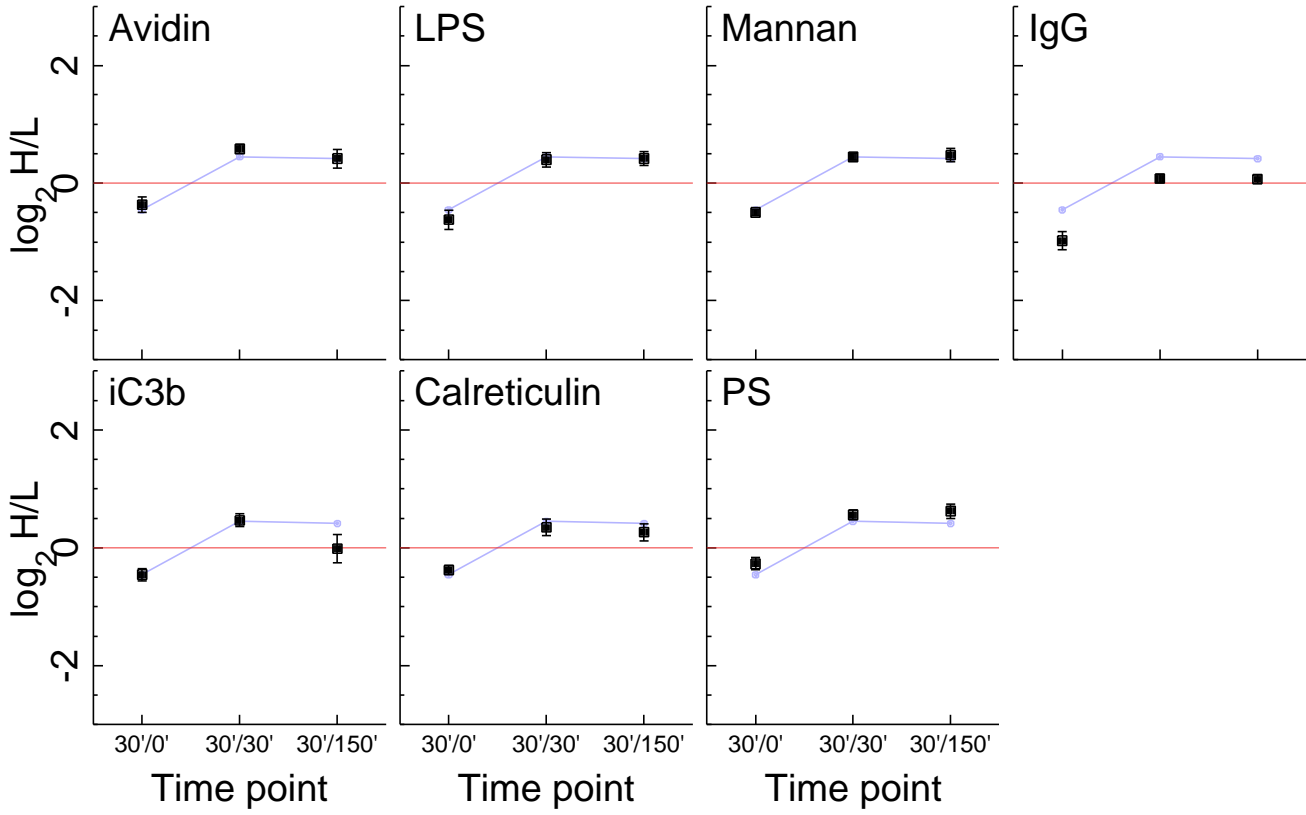

flot2 (Q60634)

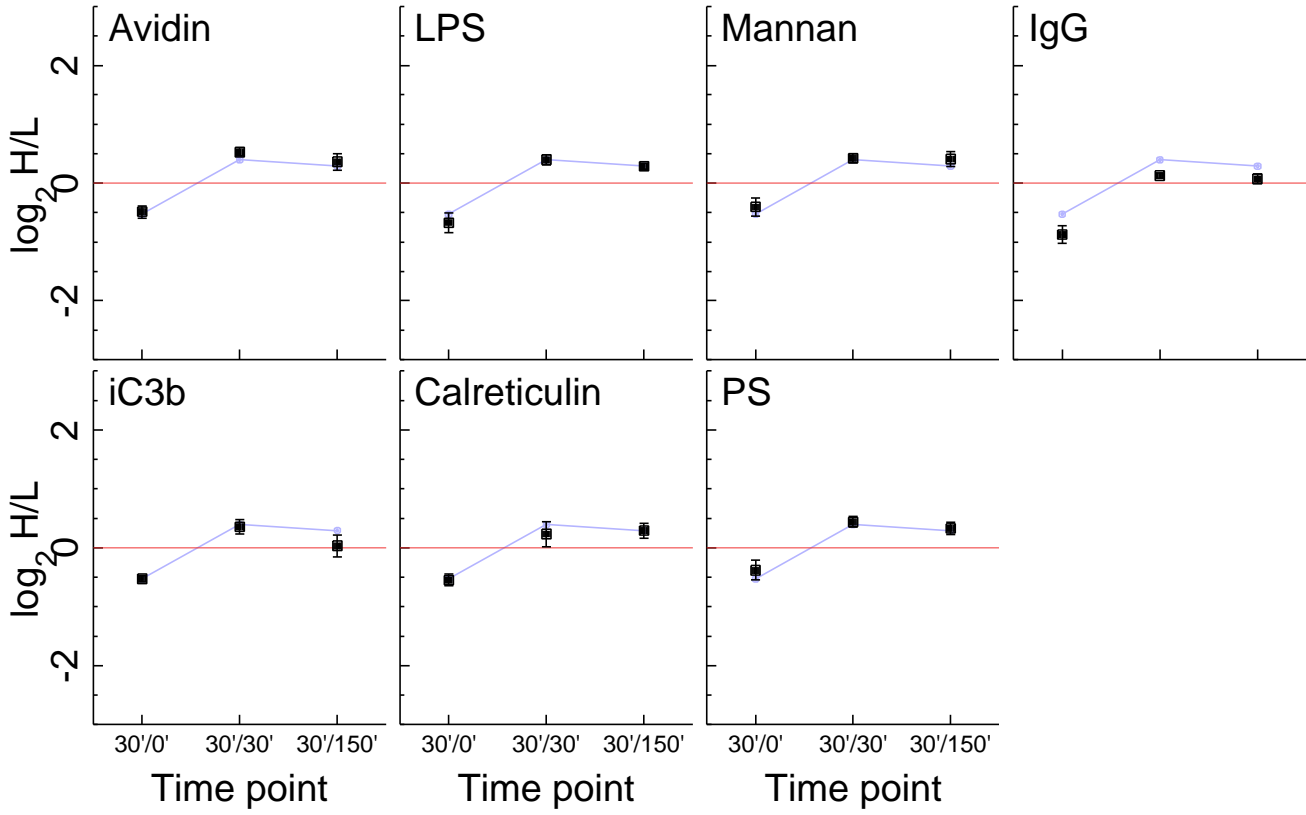



### fmnl1 (Q9JL26)

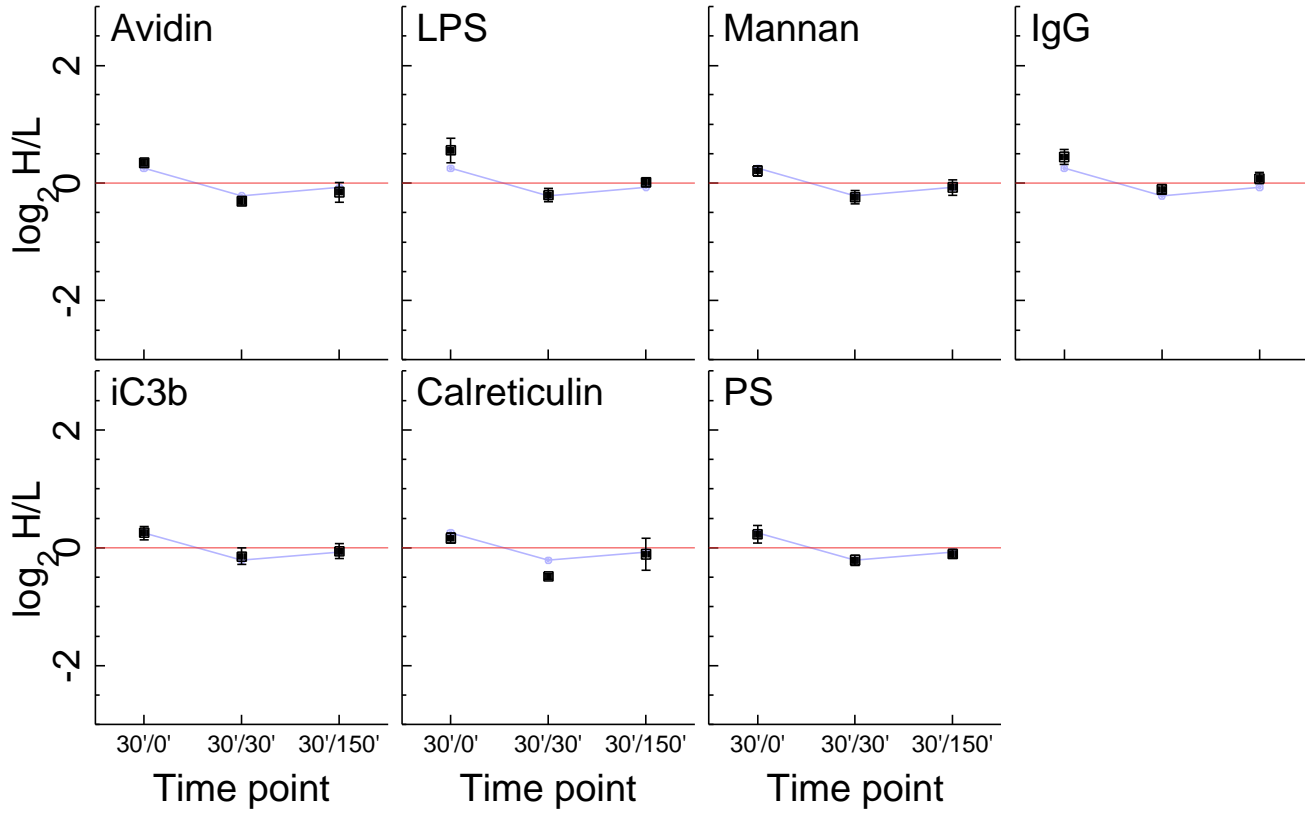

fn1 (P11276)

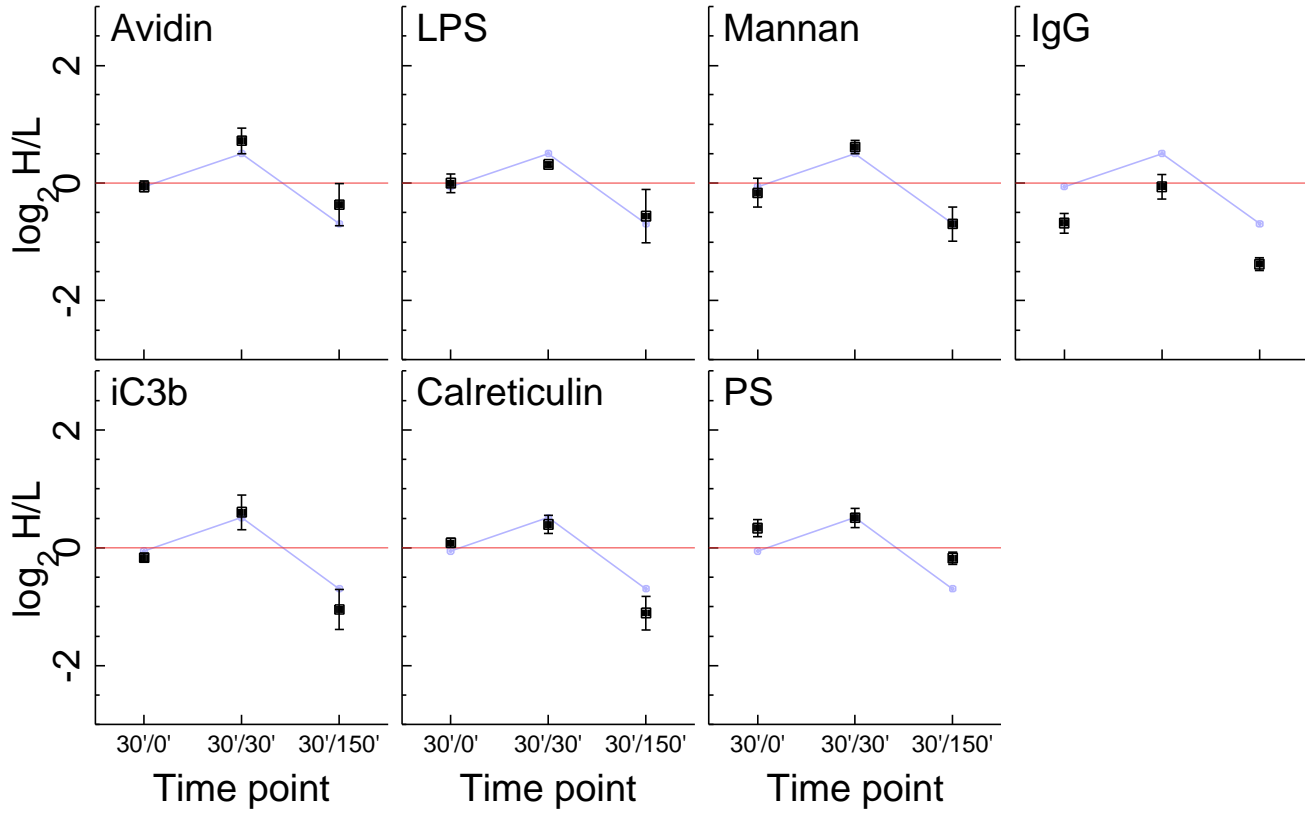

fnbp1 (Q80TY0)

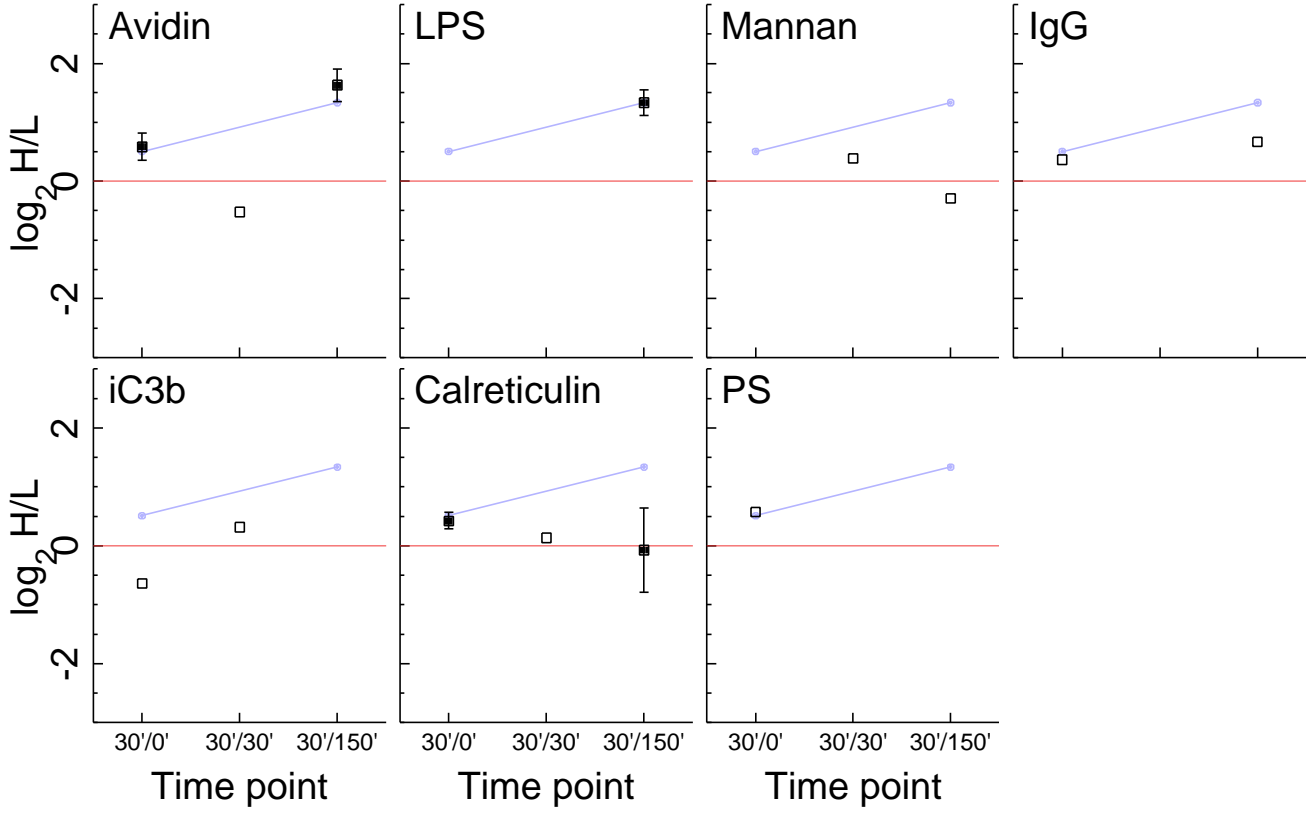

### folr2 (Q05685)

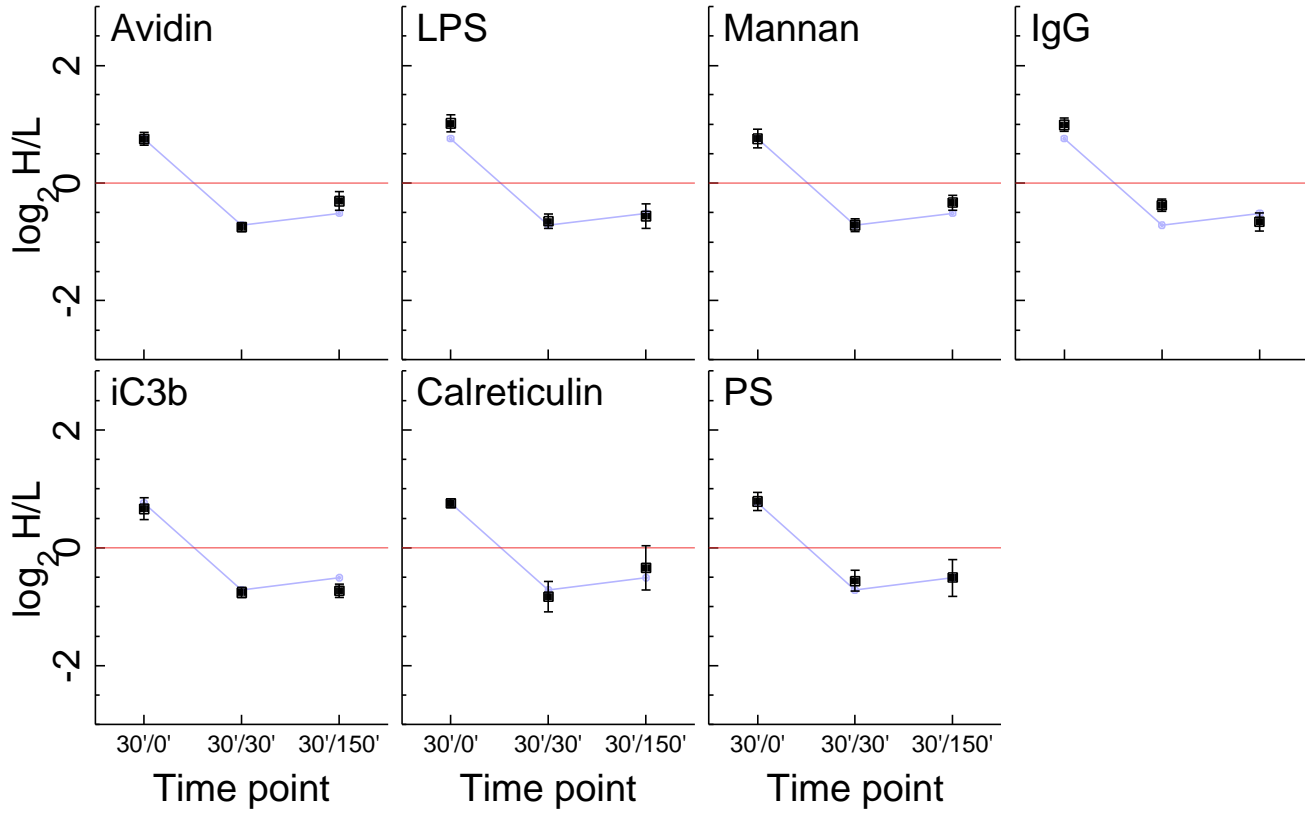

frmd8 (Q3U FK8)

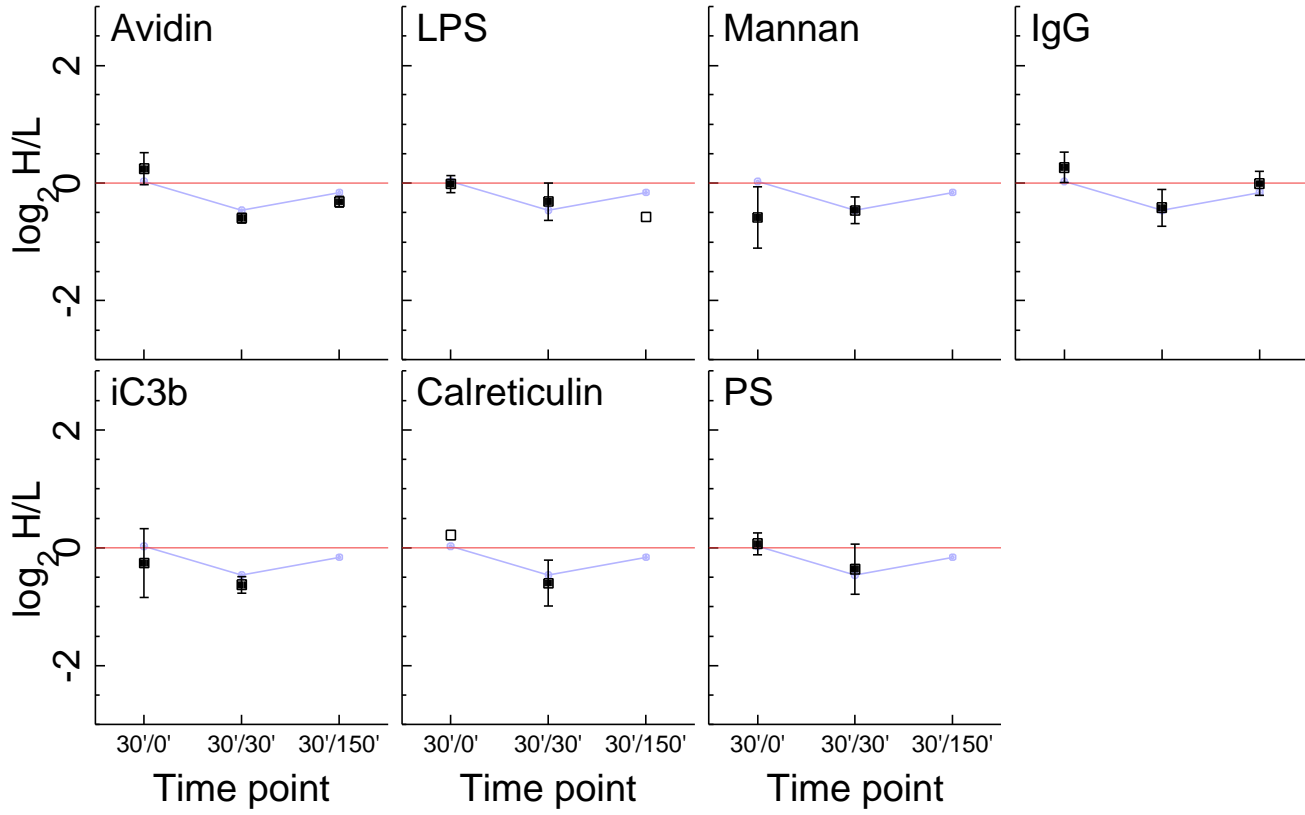

### frrs1 (Q8K385)

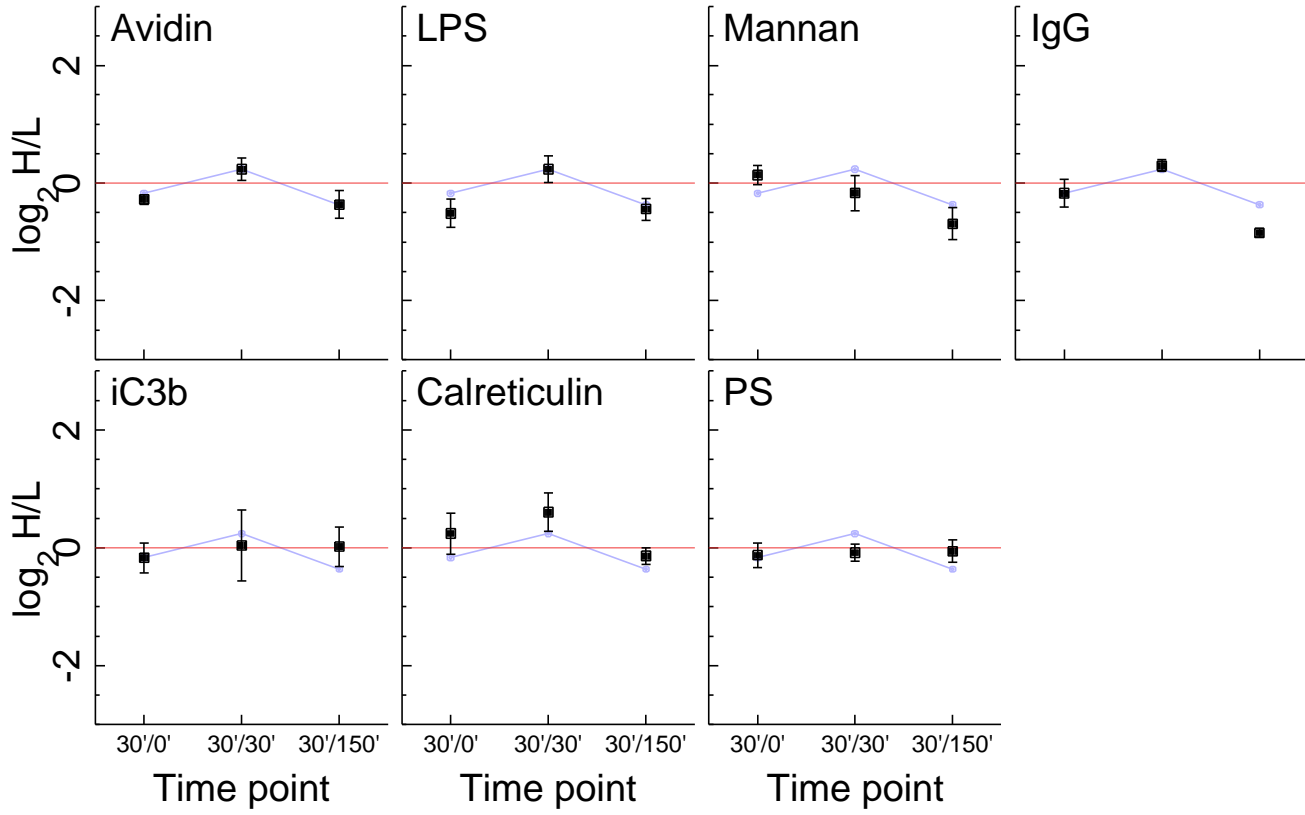

fth1 (P09528)

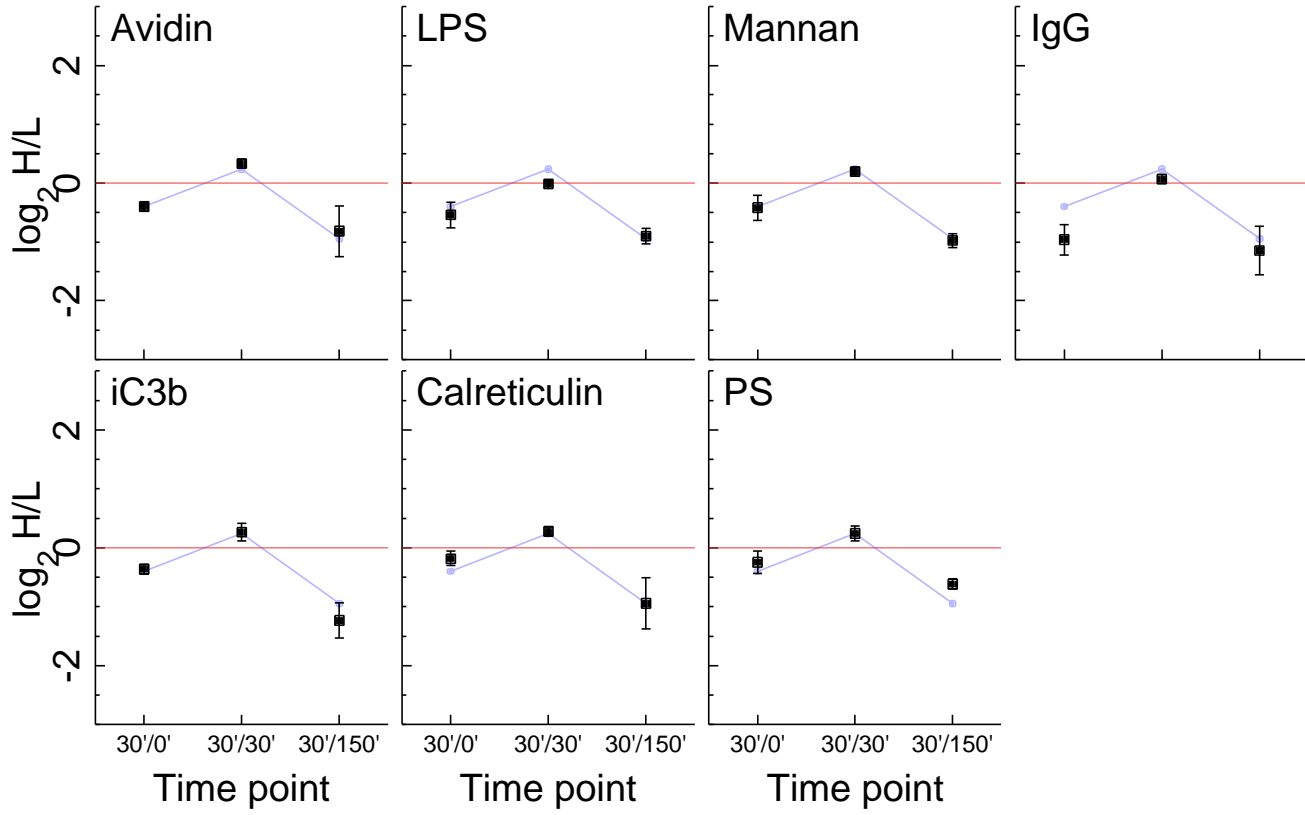

### ftl1 (Q9CPX4)

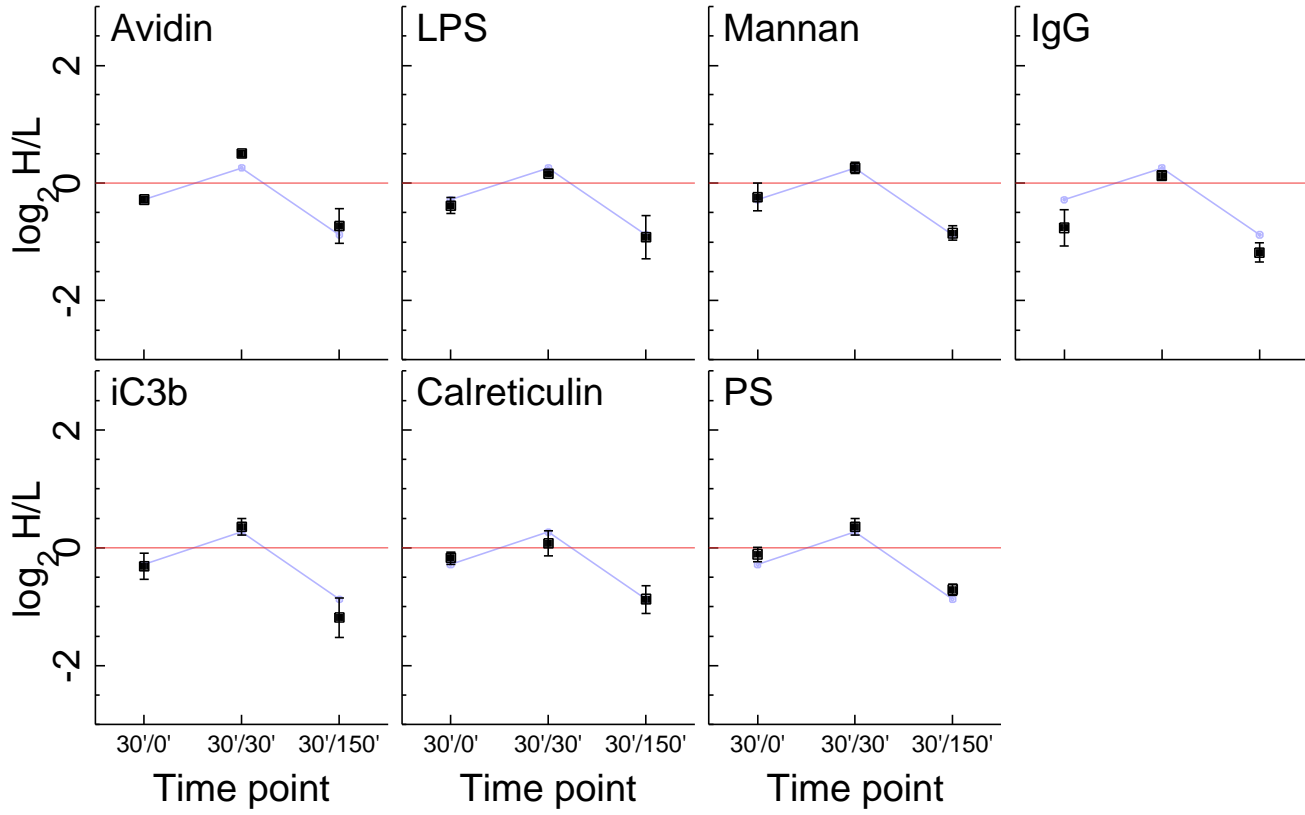



### fuca1 (Q99LJ1)

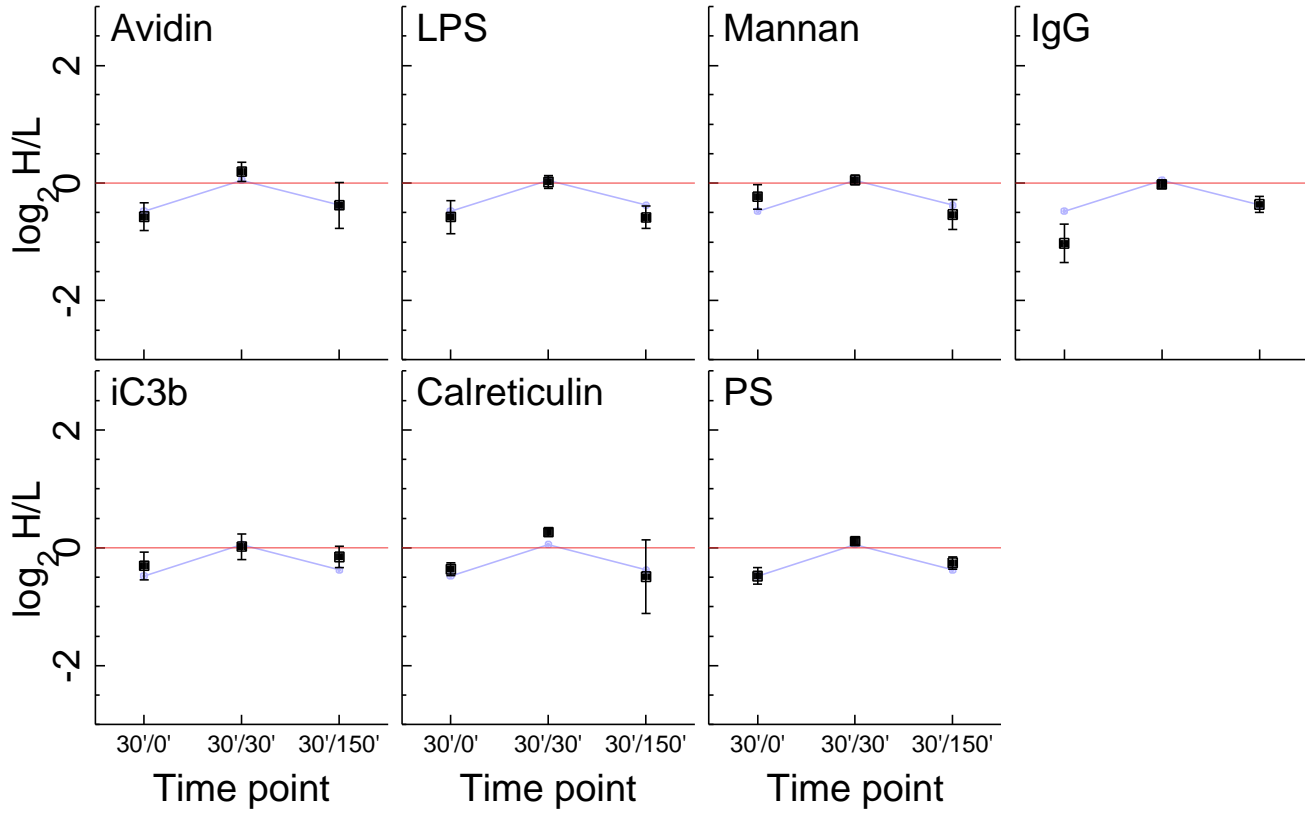

# fuca2 (Q99KR8)

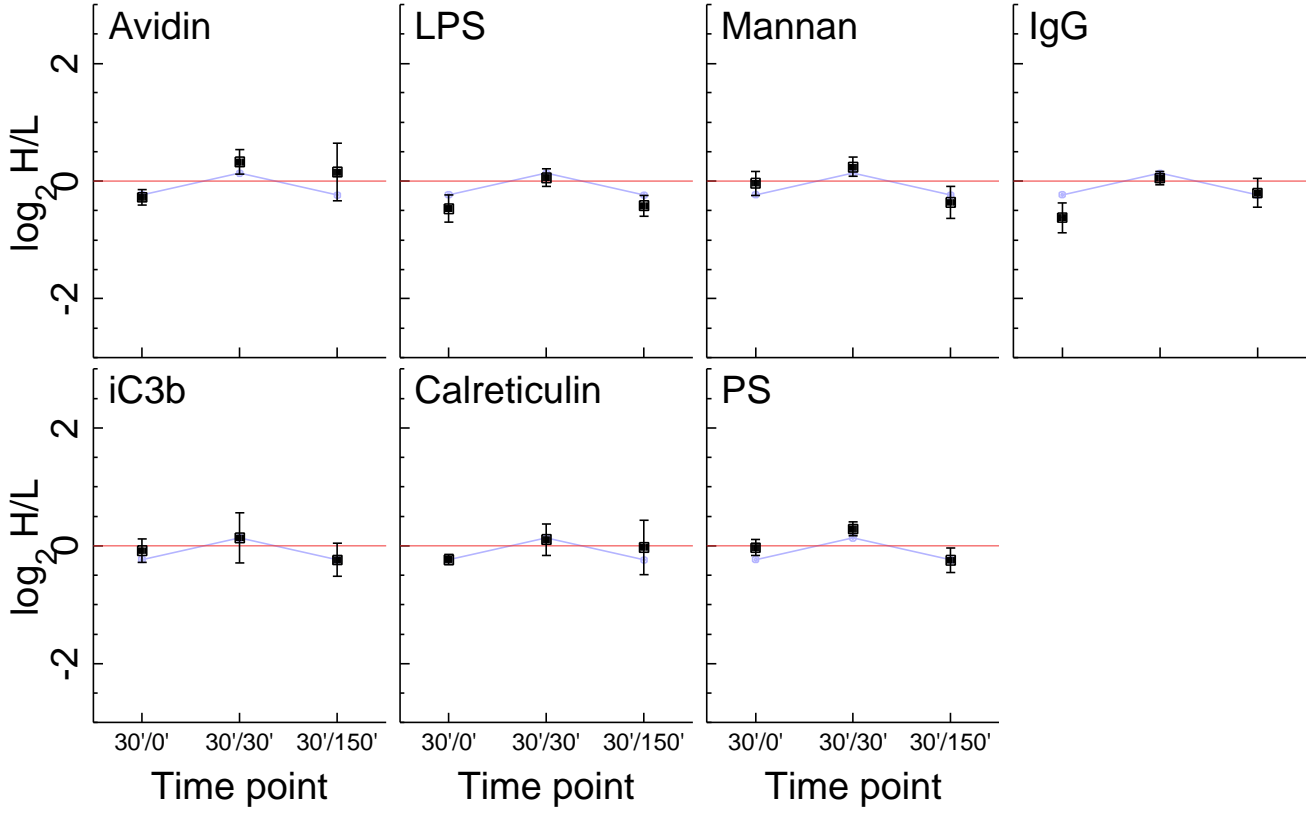

fus (P56959)

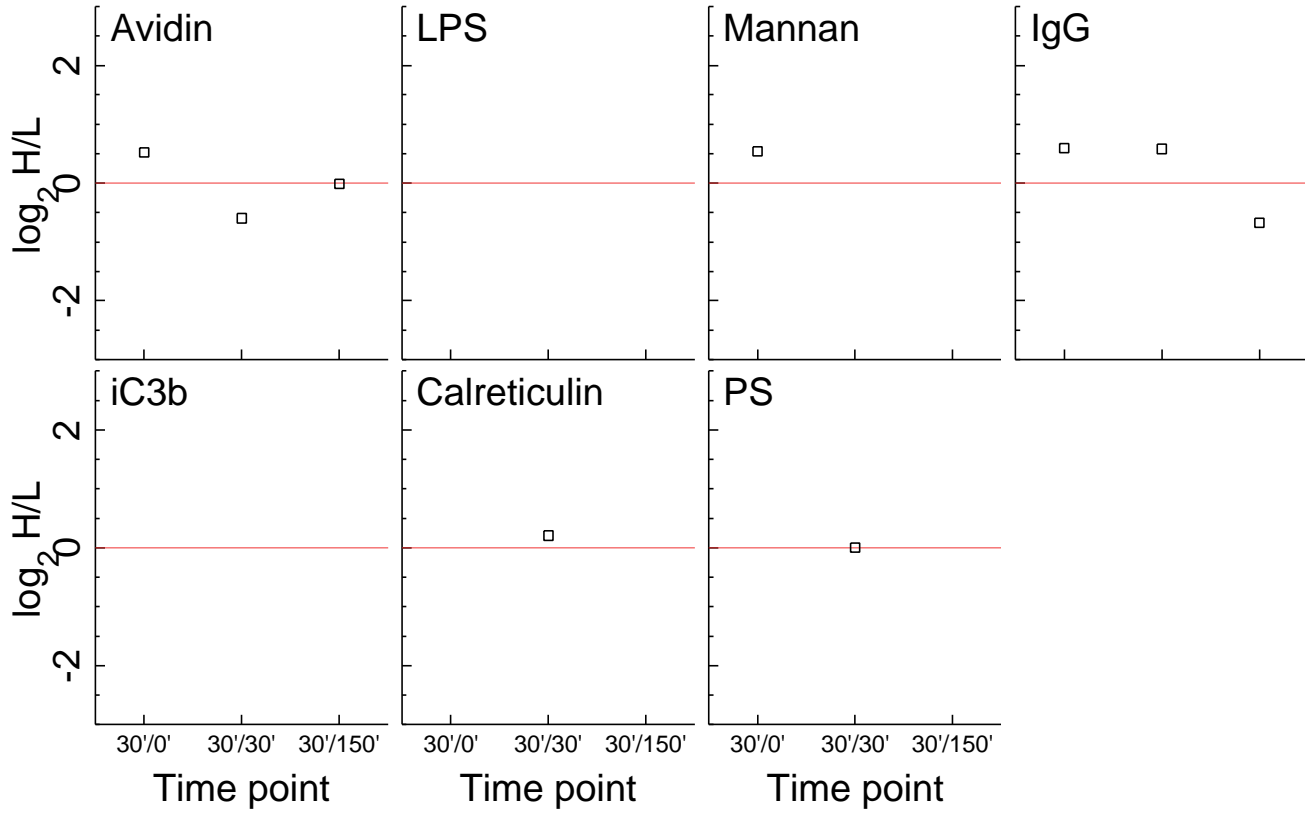

fxyd5 (E0CXN1)

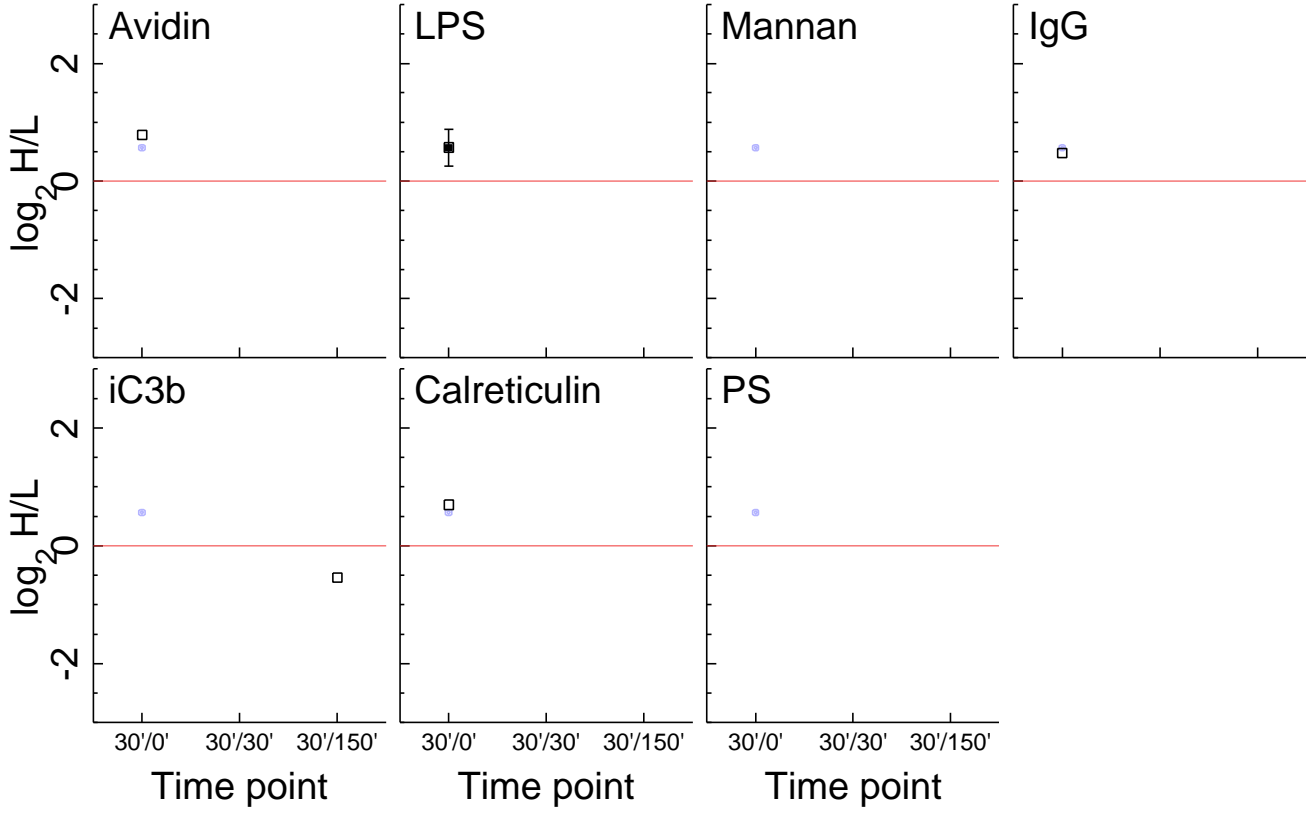

fyb (O35601)

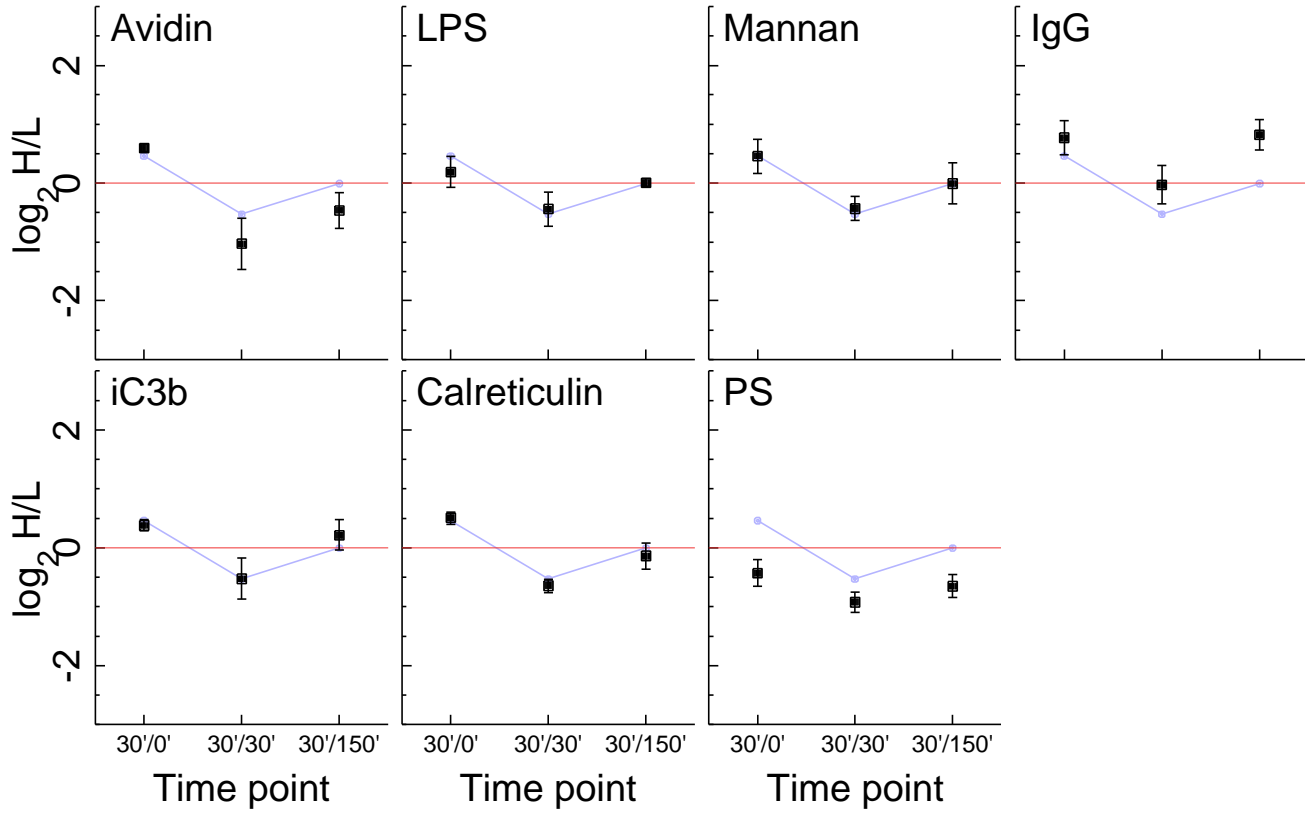

### fyco1 (Q8VDC1)

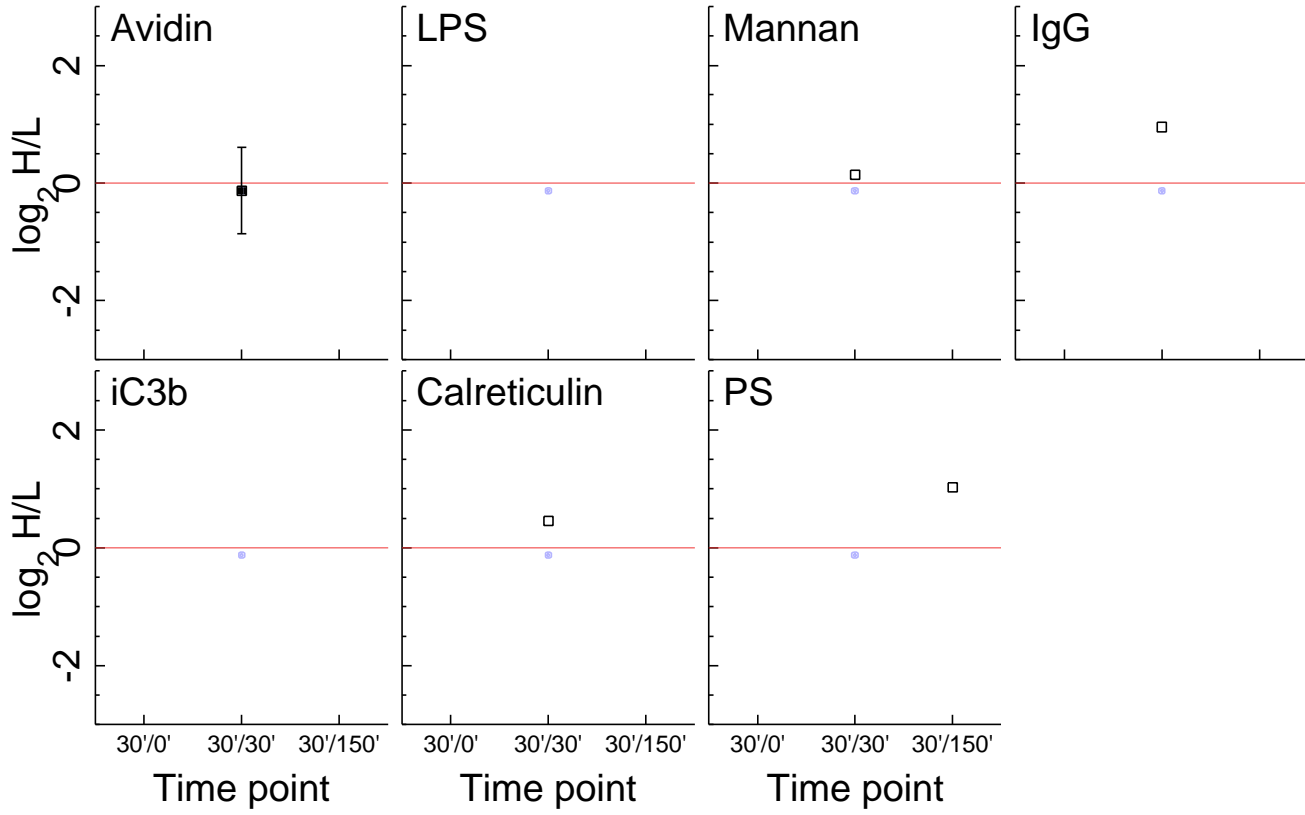

fyn (P39688)

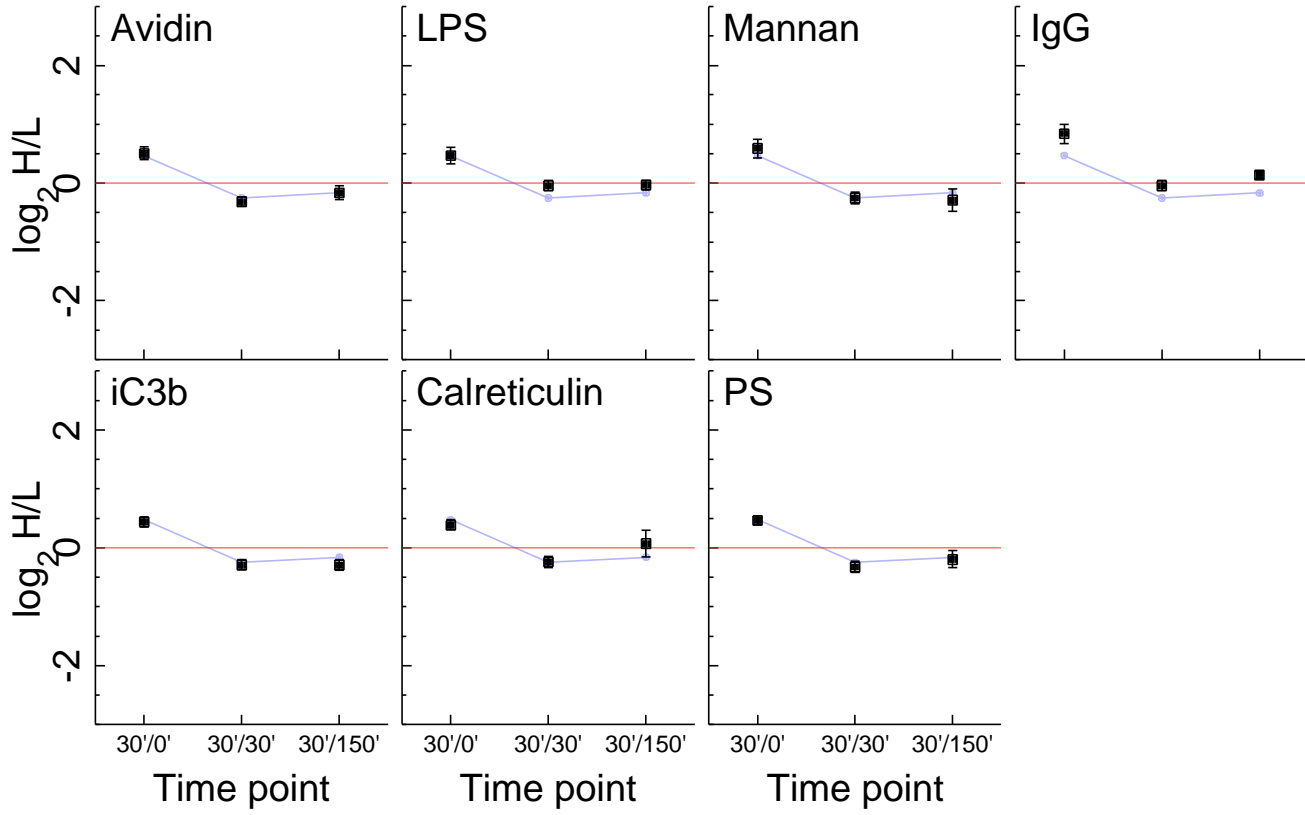

### g3bp1 (P97855)

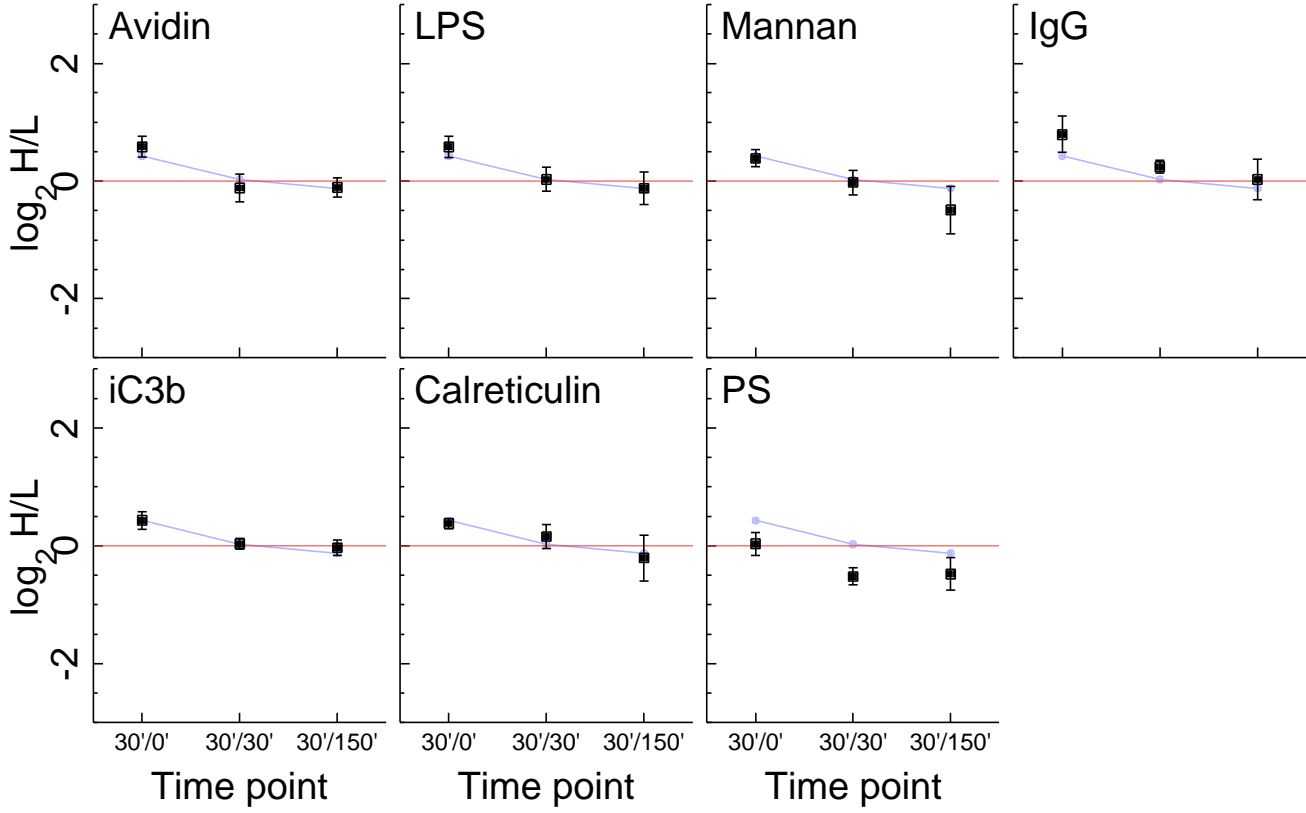



### g3bp2 (P97379)

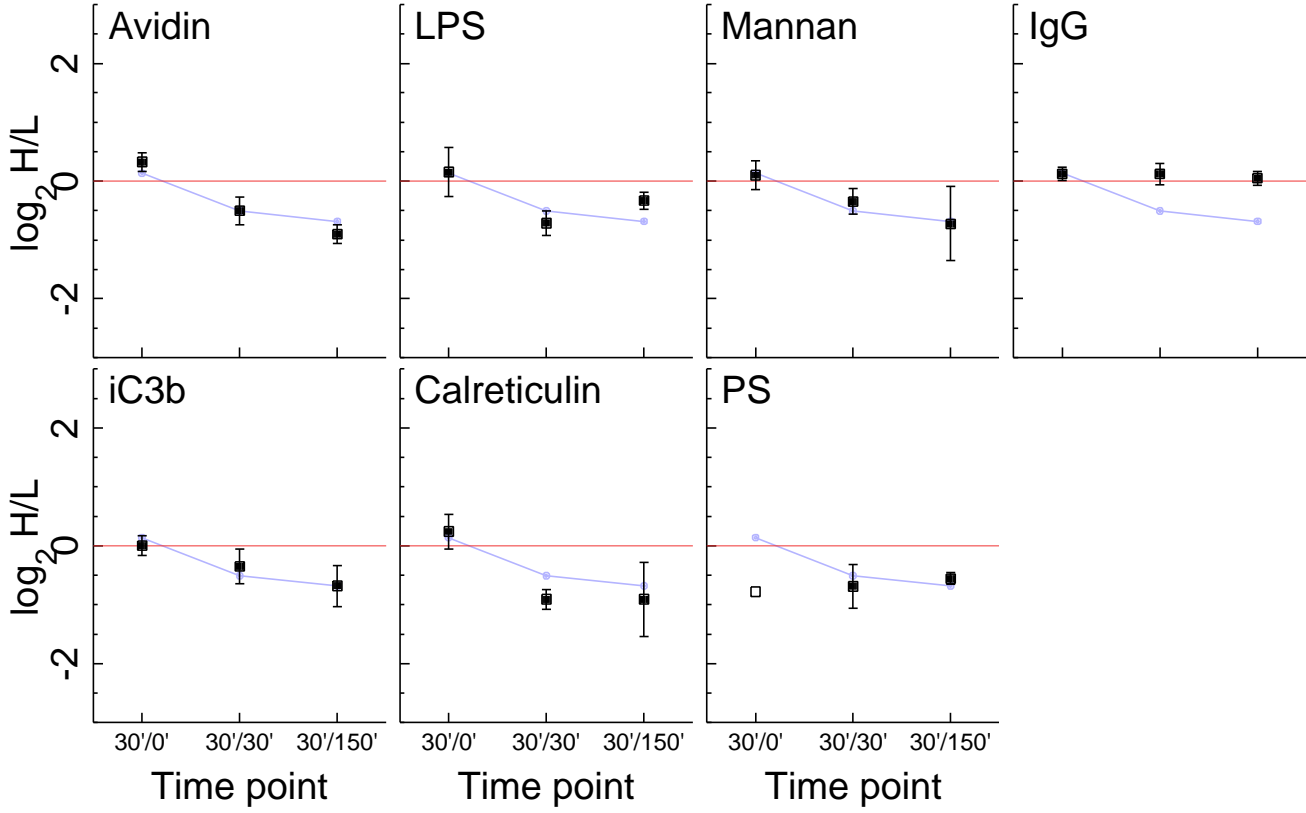

g6pdx (Q00612)

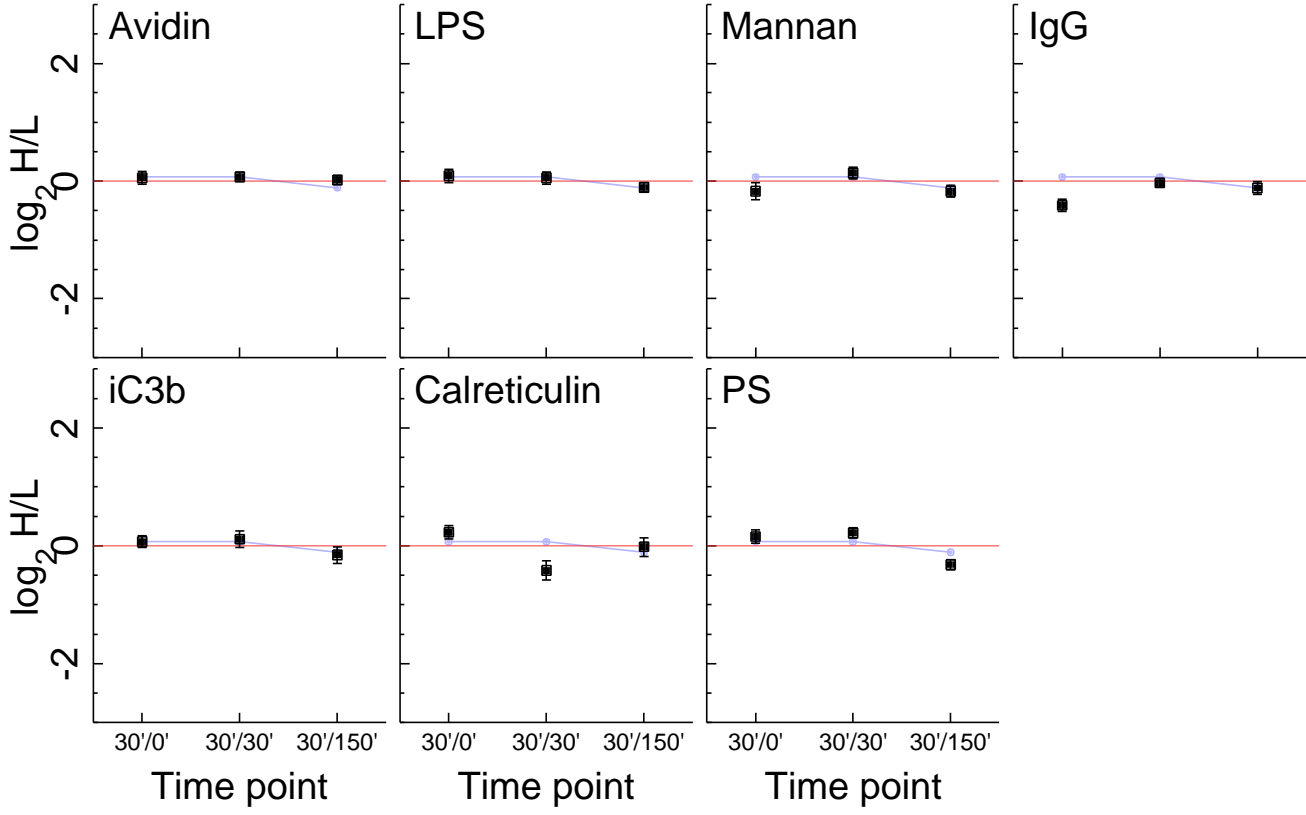

gaa (P70699)

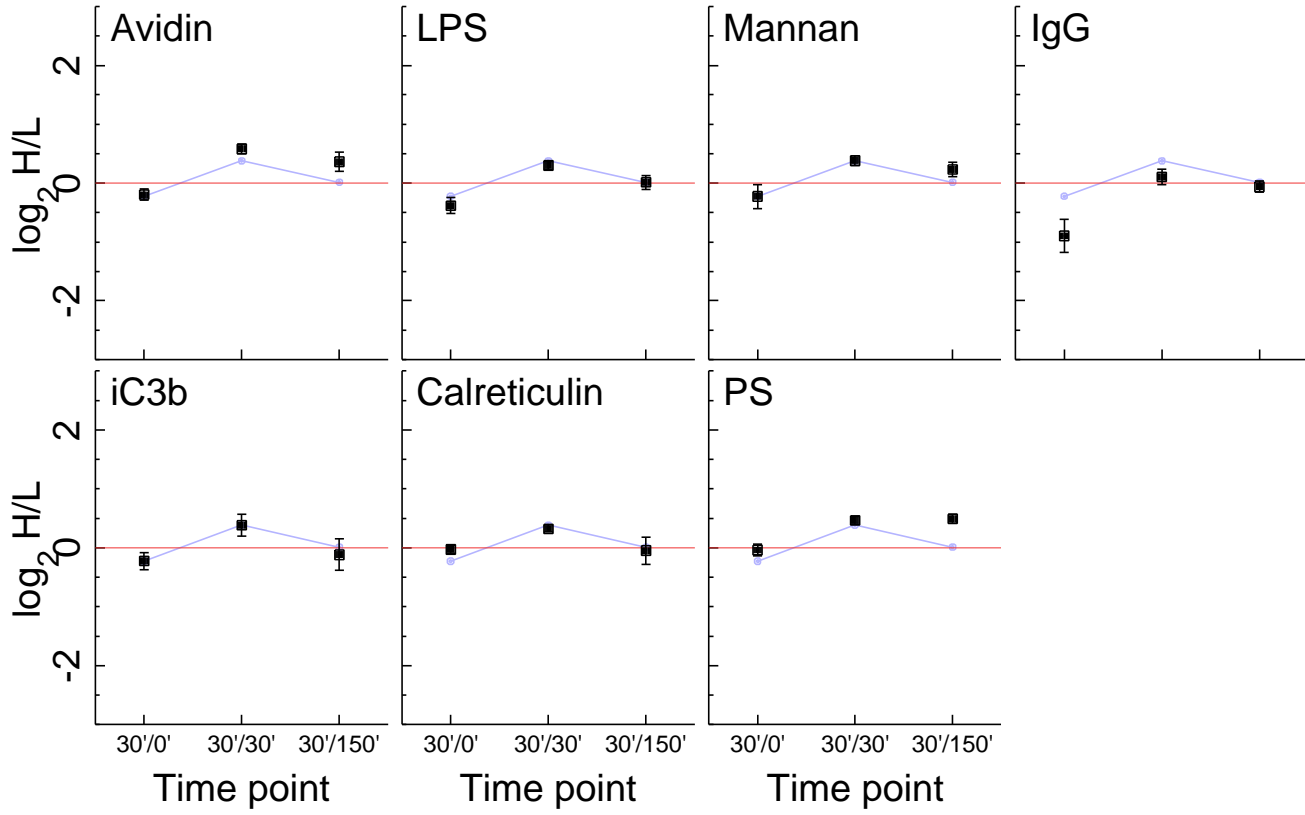

### gabarapl2 (P60521)

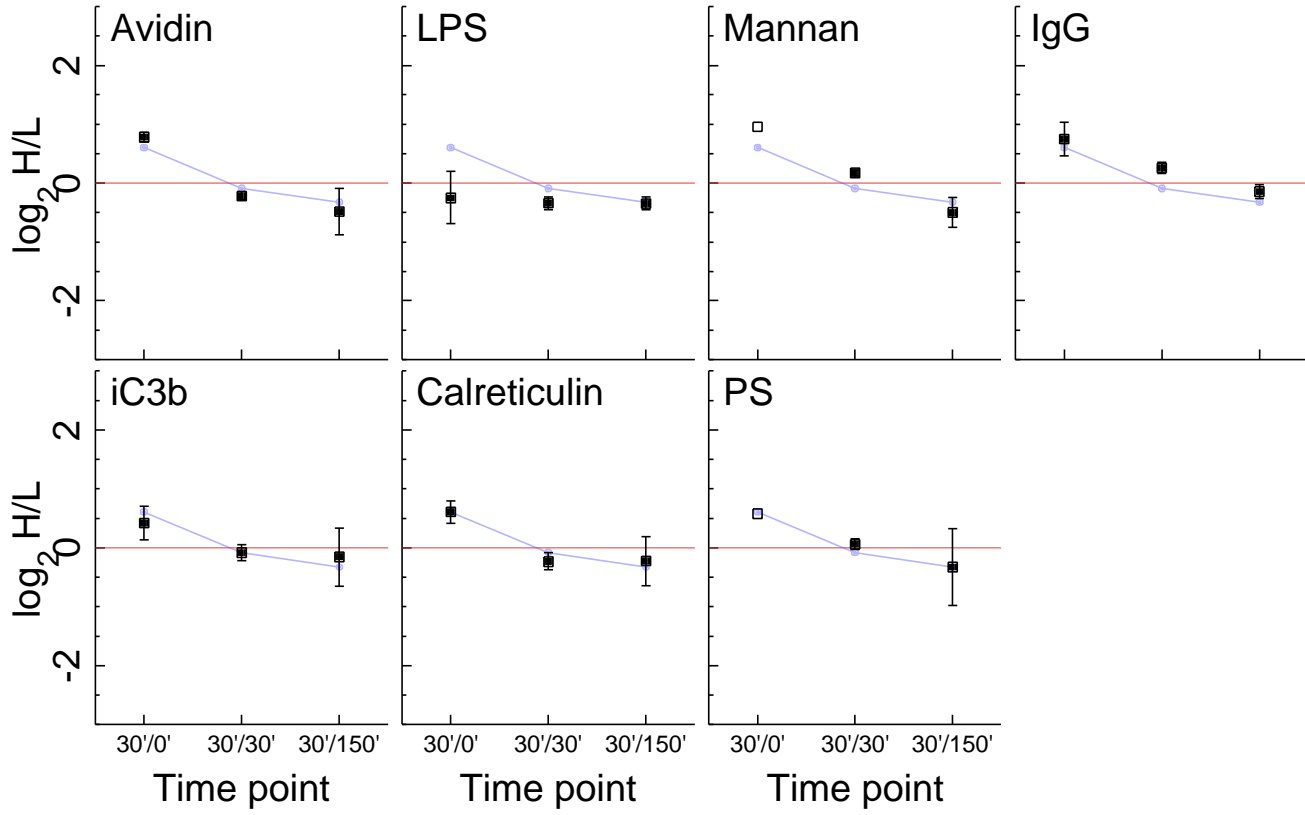

gabarap (Q9DCD6)

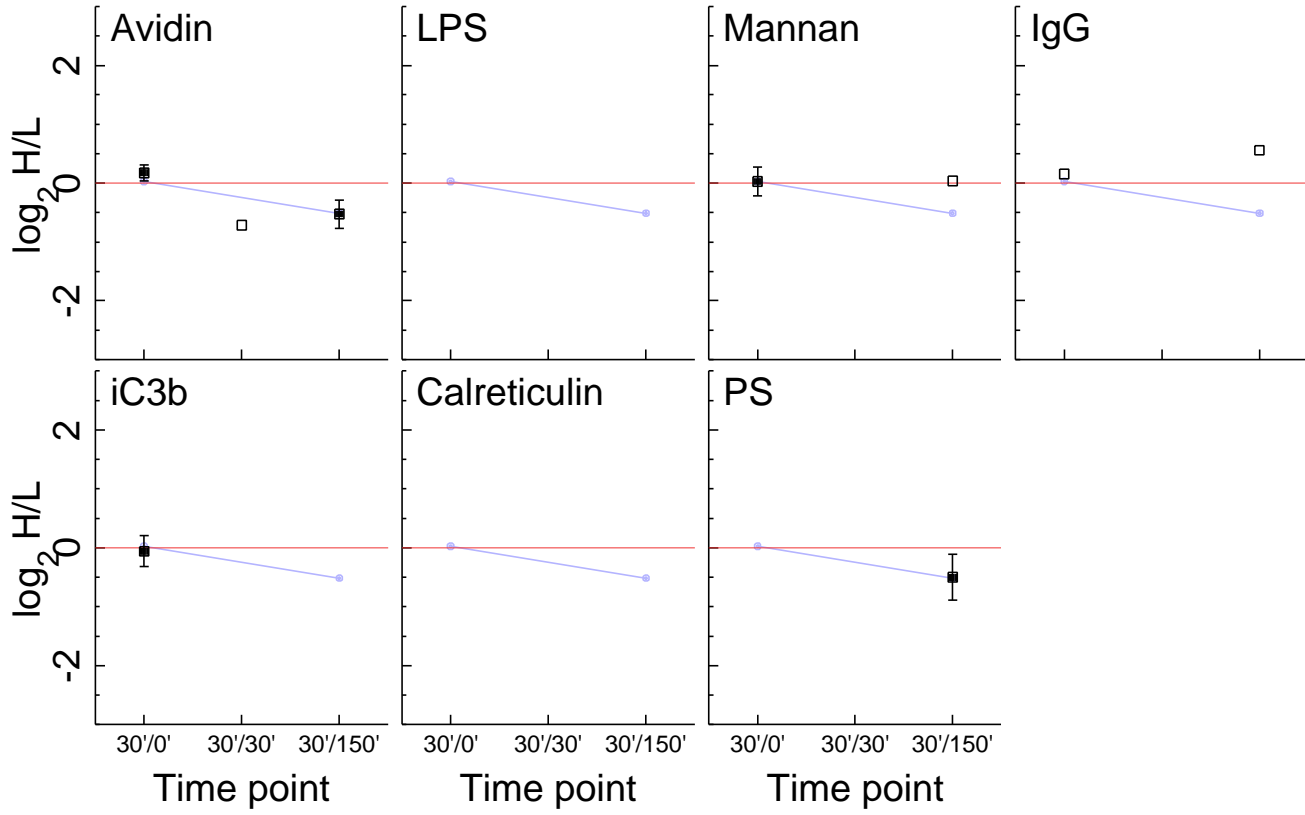

gak (Q99KY4)

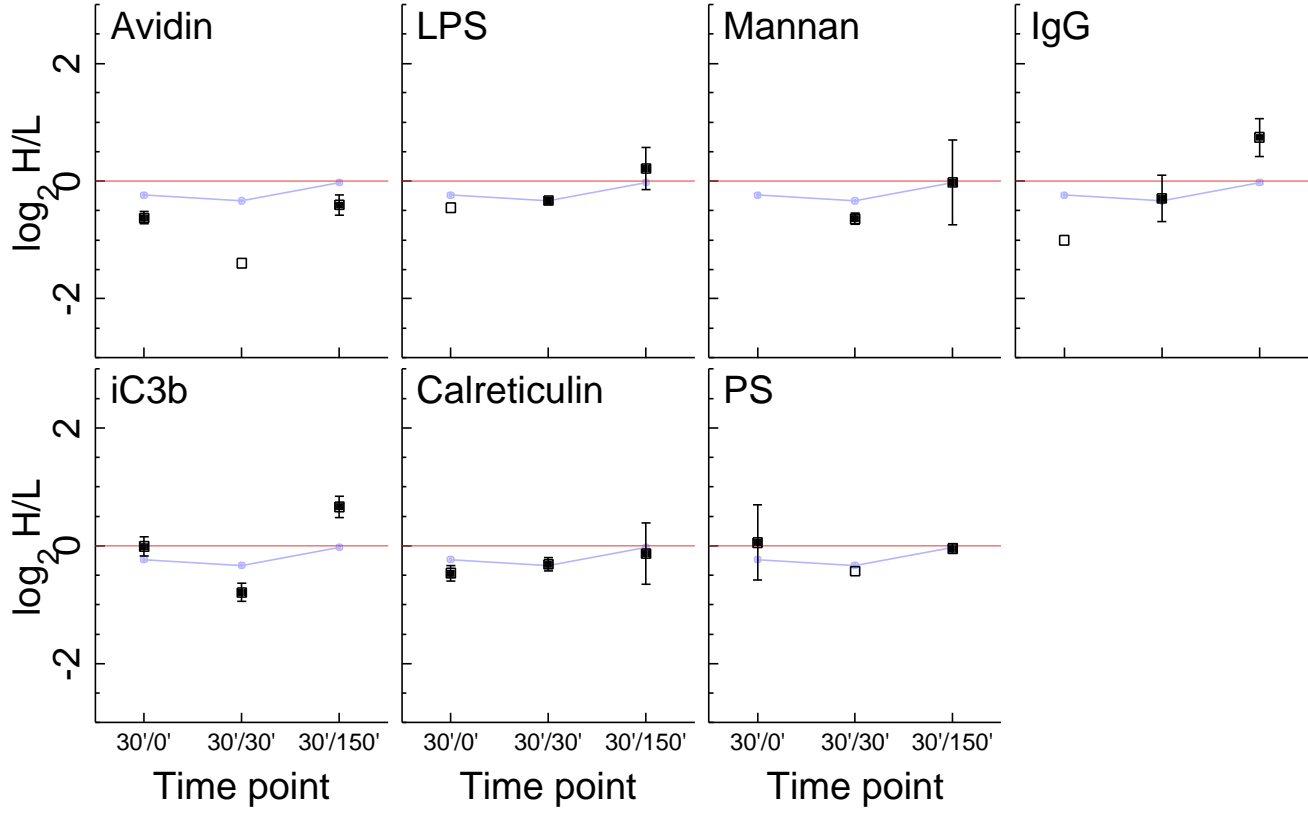

galc (P54818)

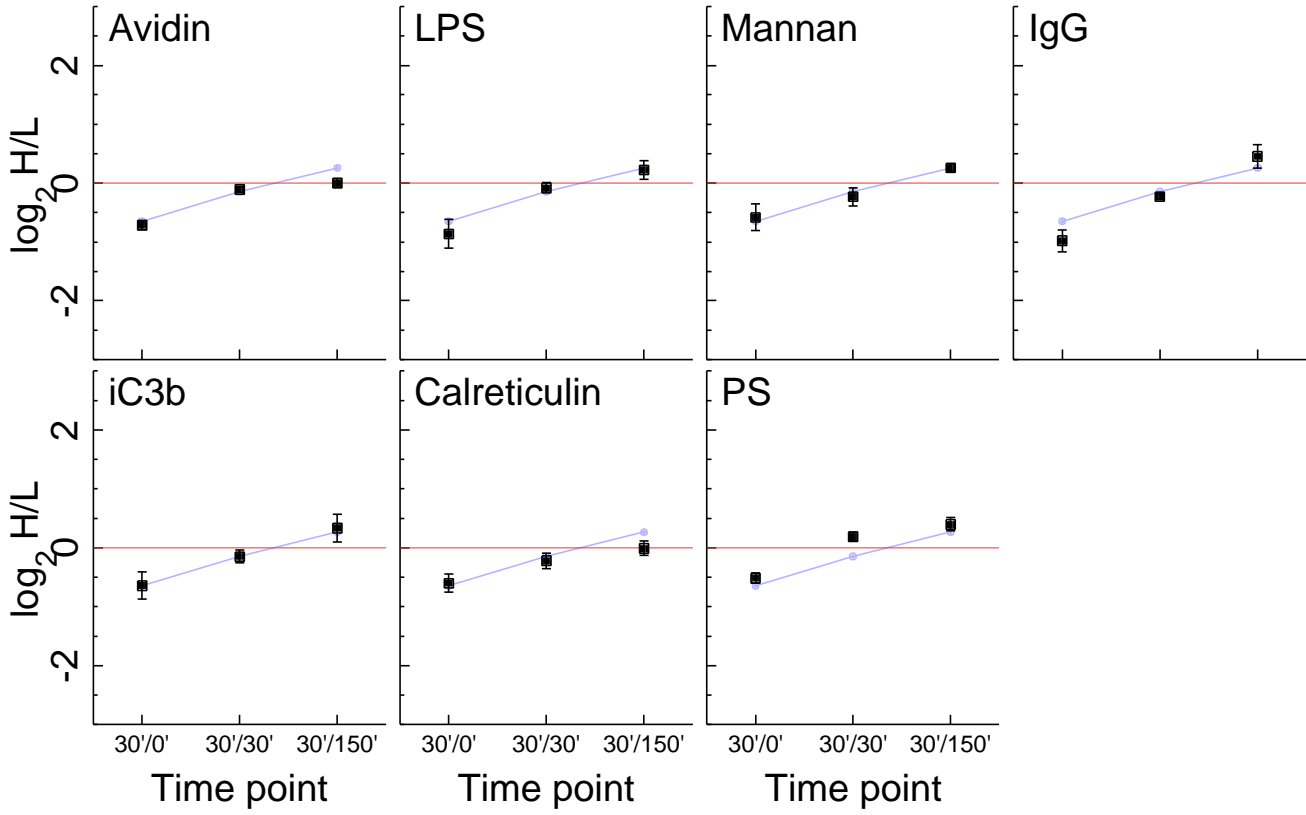

### galns (Q571E4)

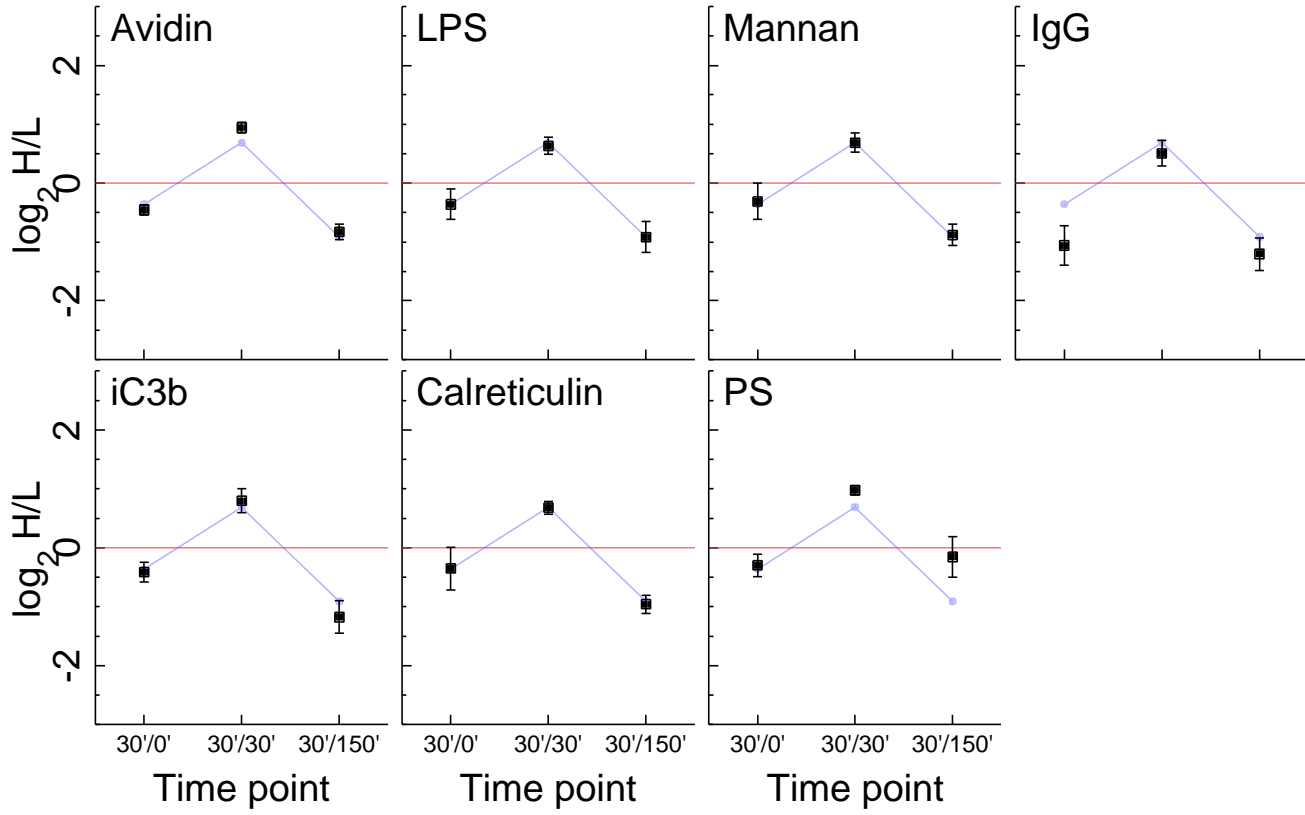



galnt2 (Q6PB93)

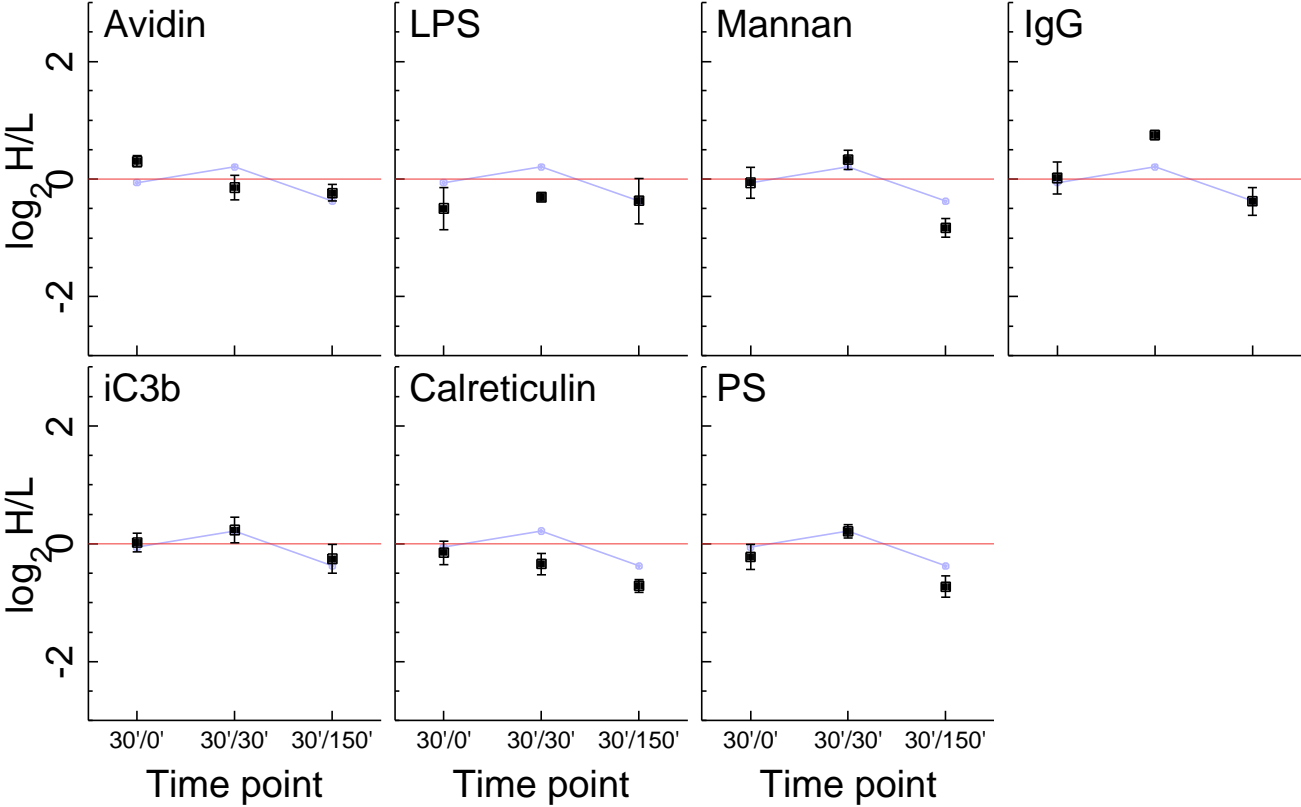

galnt7 (Q80VA0)

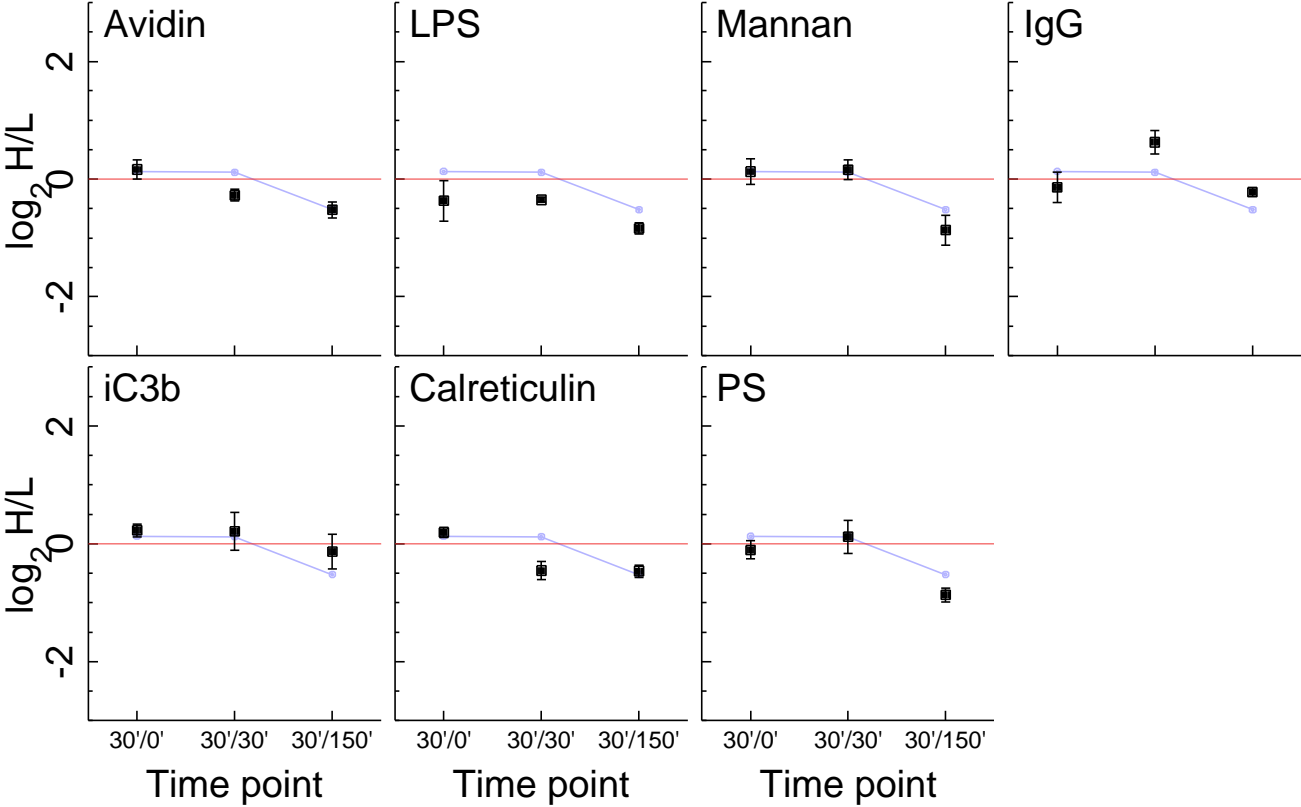

### ganab (Q8BHN3)

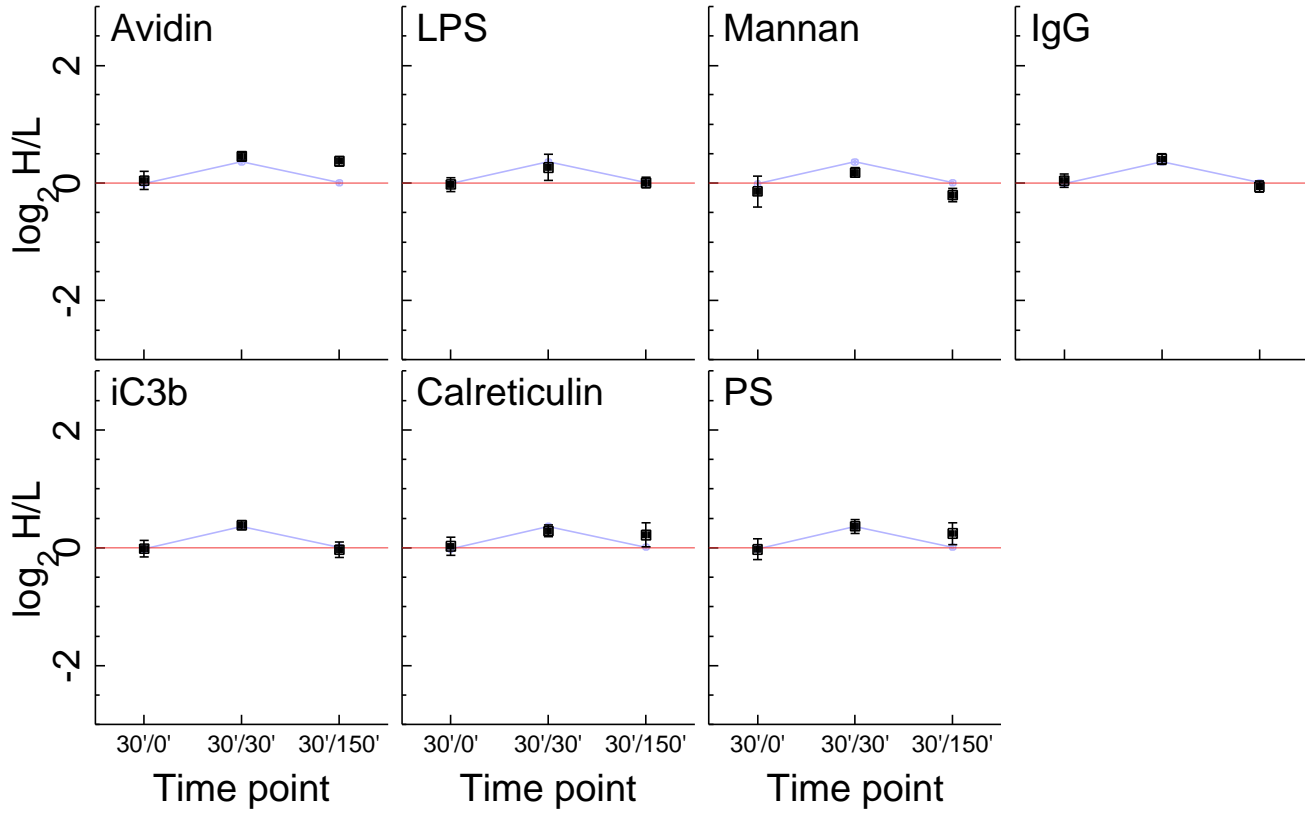

# gapdh (P16858)

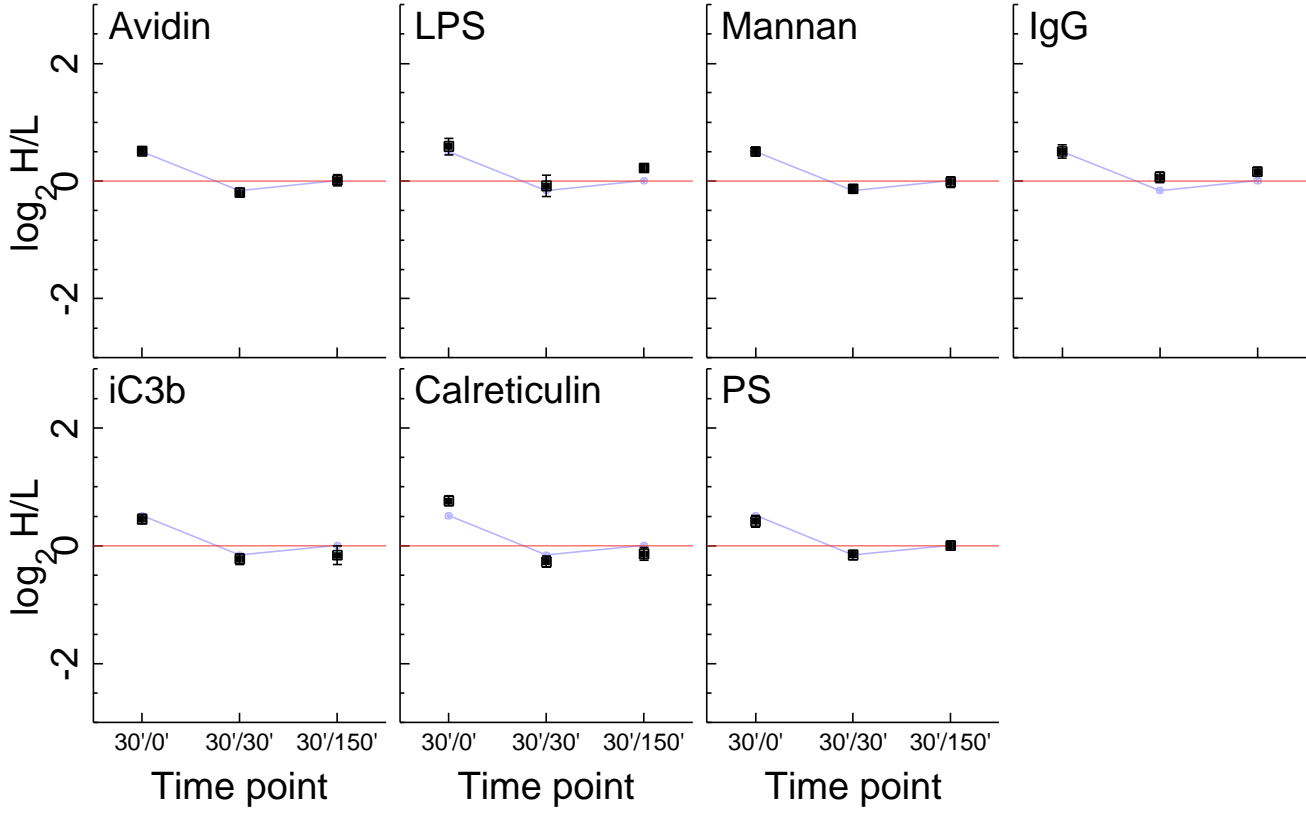

### gas7 (Q60780)

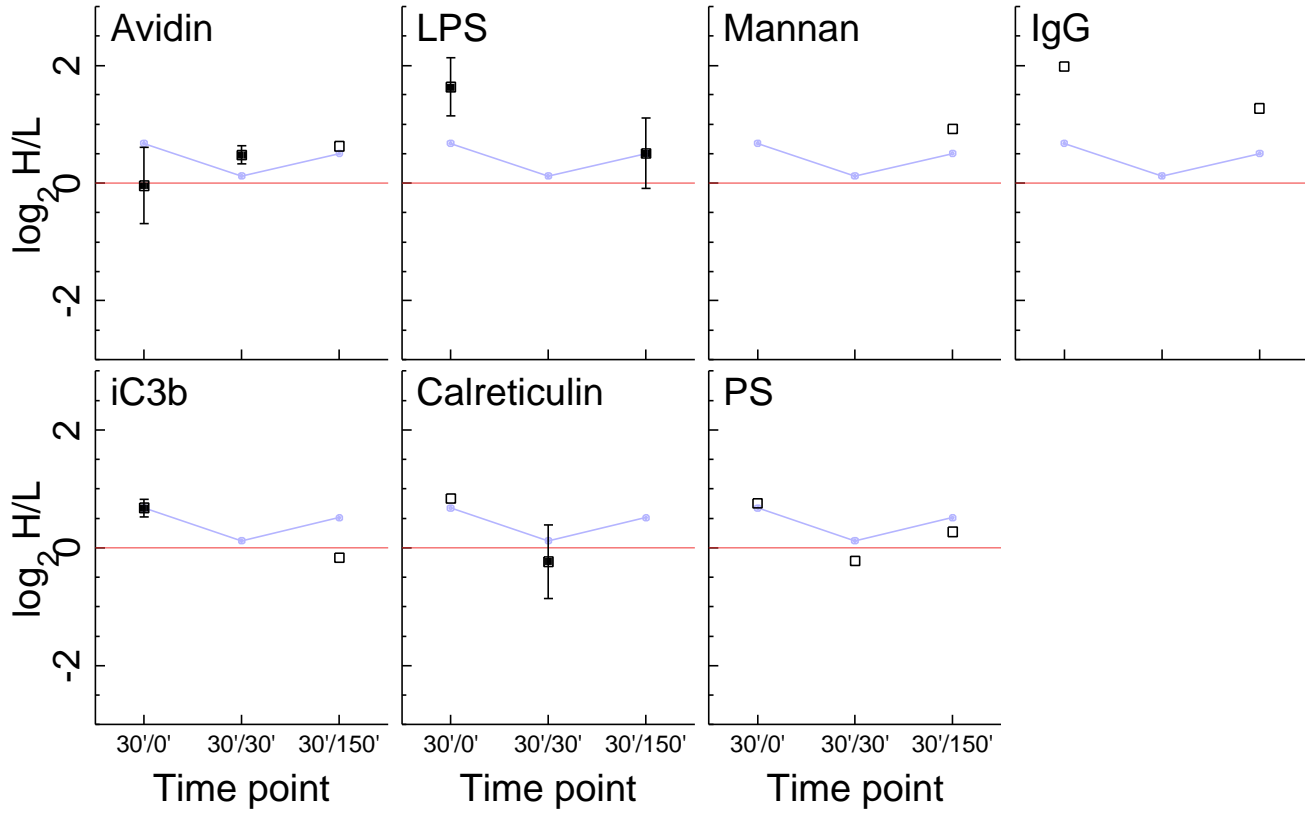

gba (P17439)

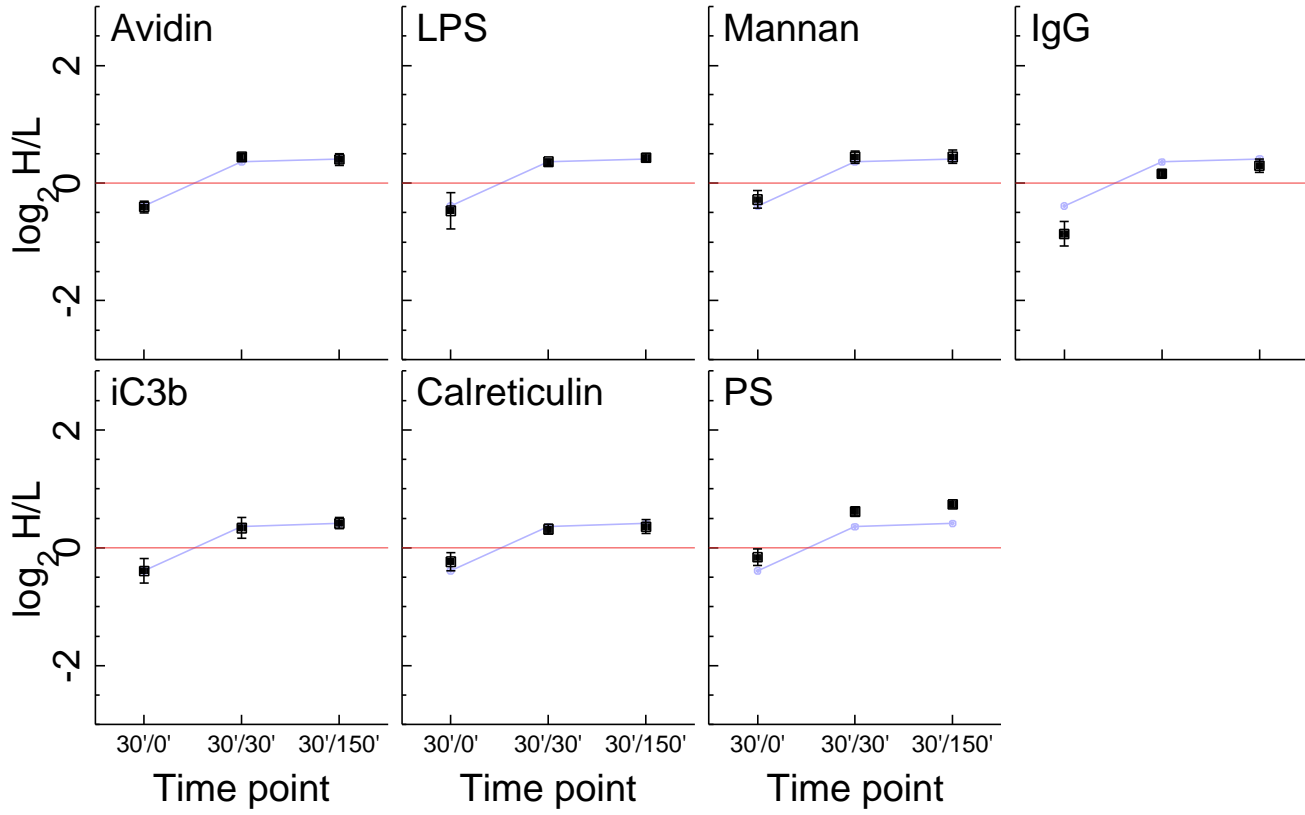

### gbp5 (Q8CFB4)

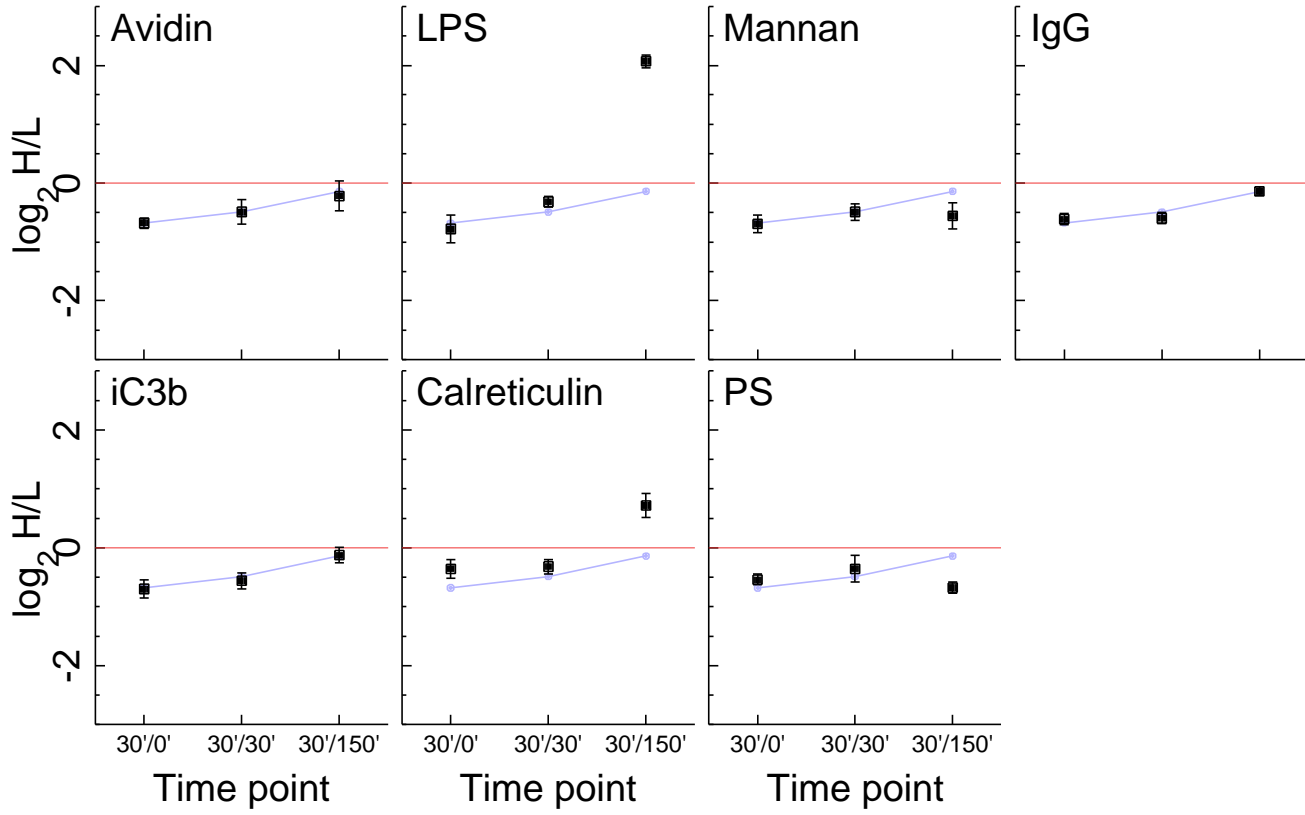

gclm (O09172)

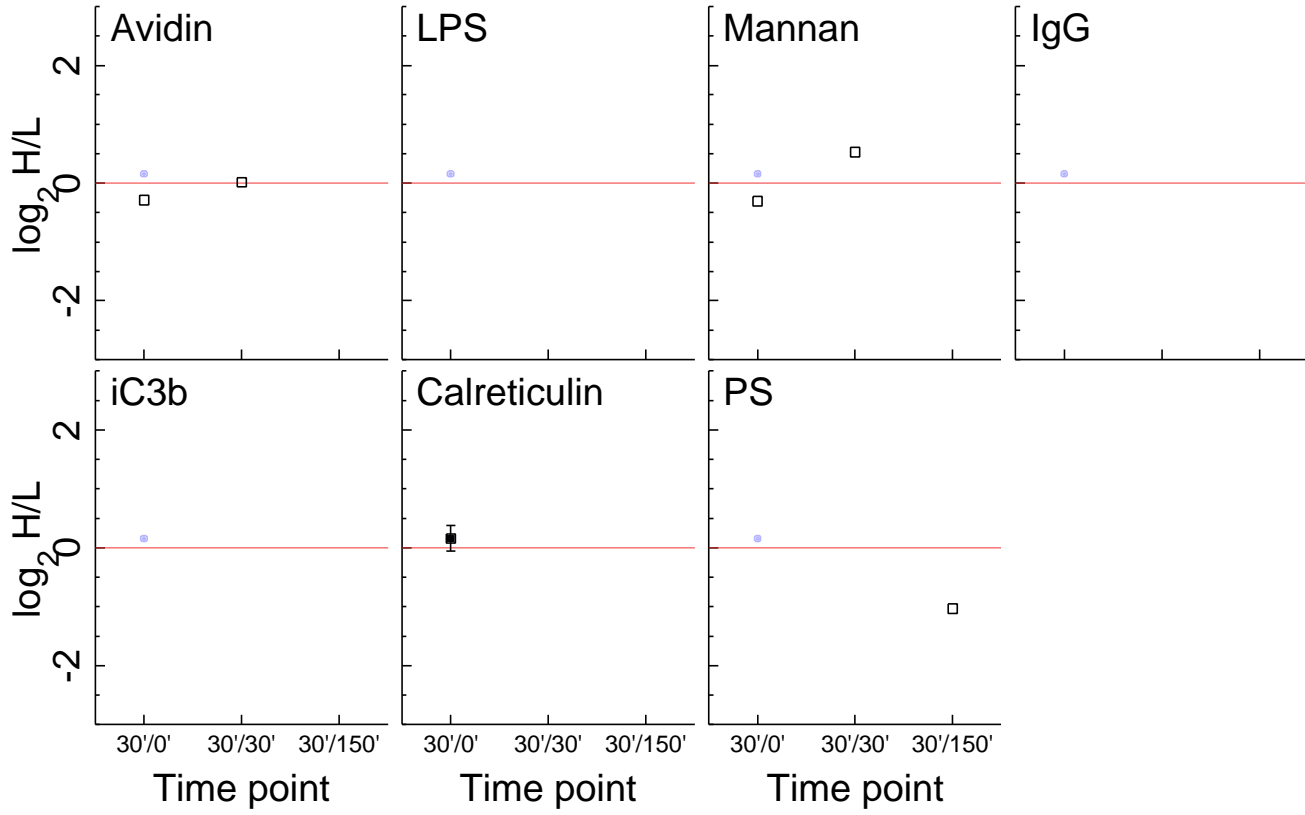



gdap2 (Q9DBL2)

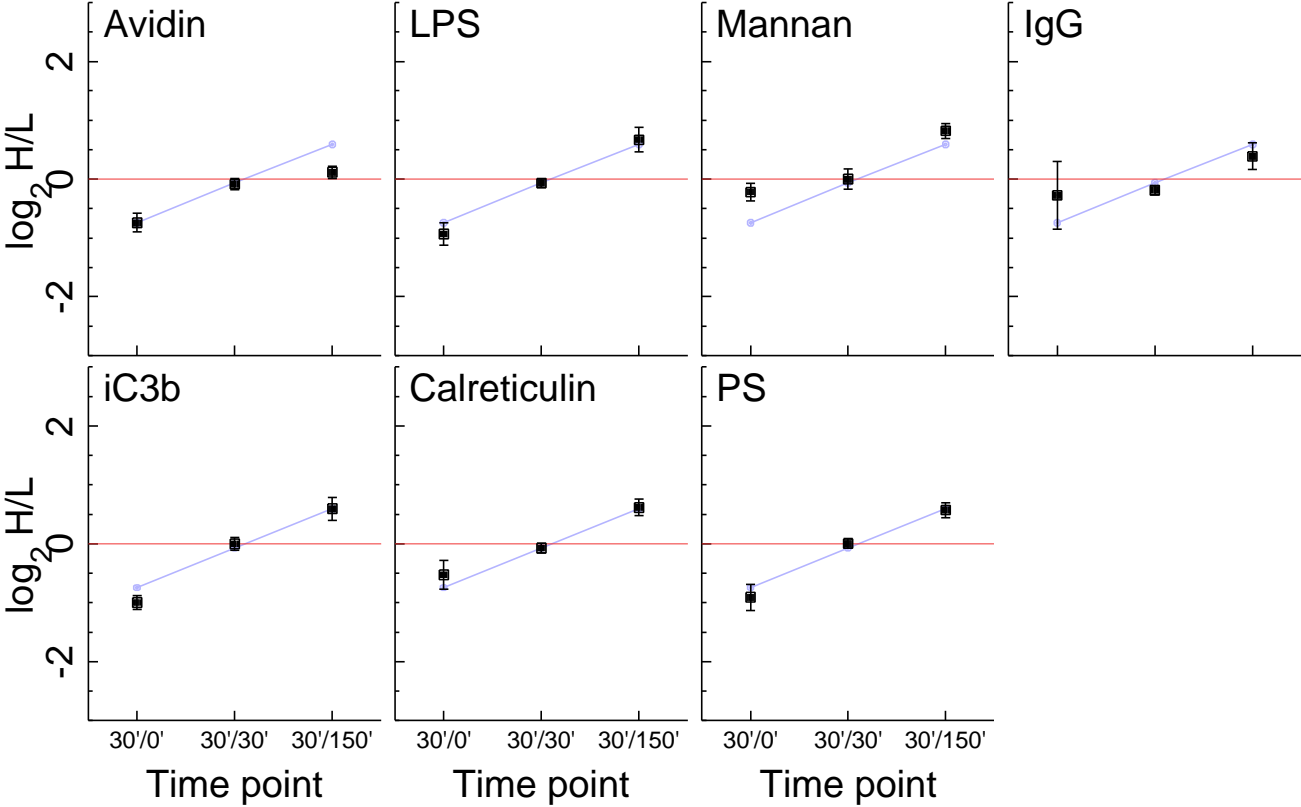

### gdi2 (Q61598)

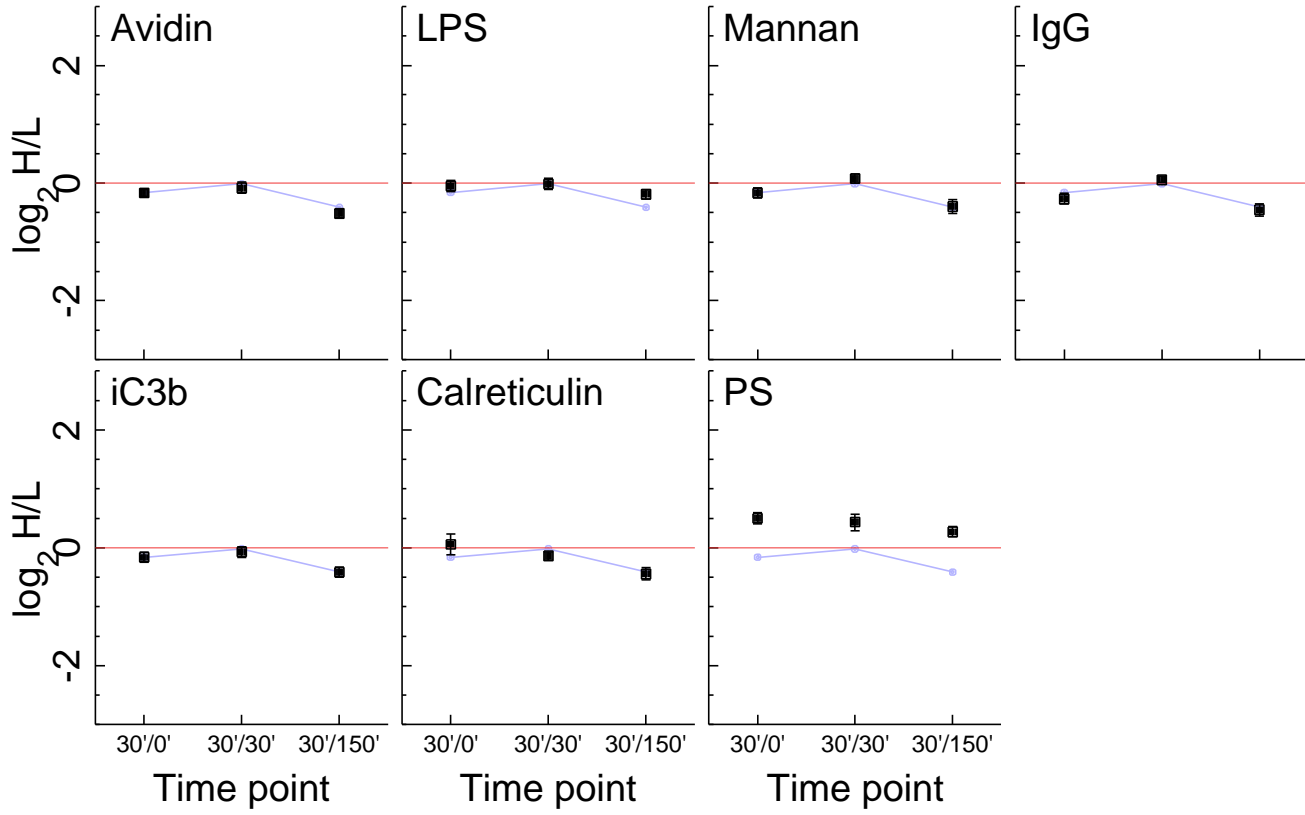

ggh (Q9Z0L8)

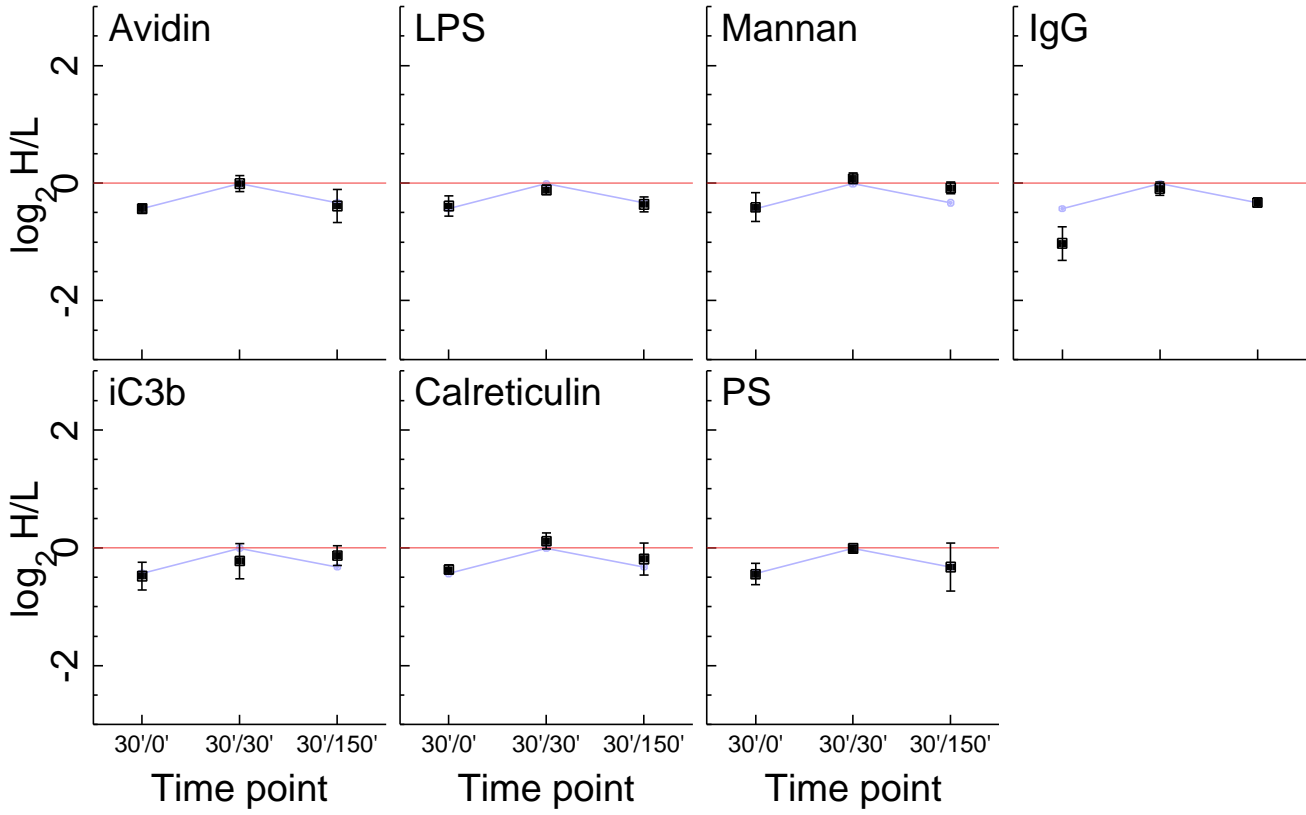

### ggta1 (Q9DBU1)

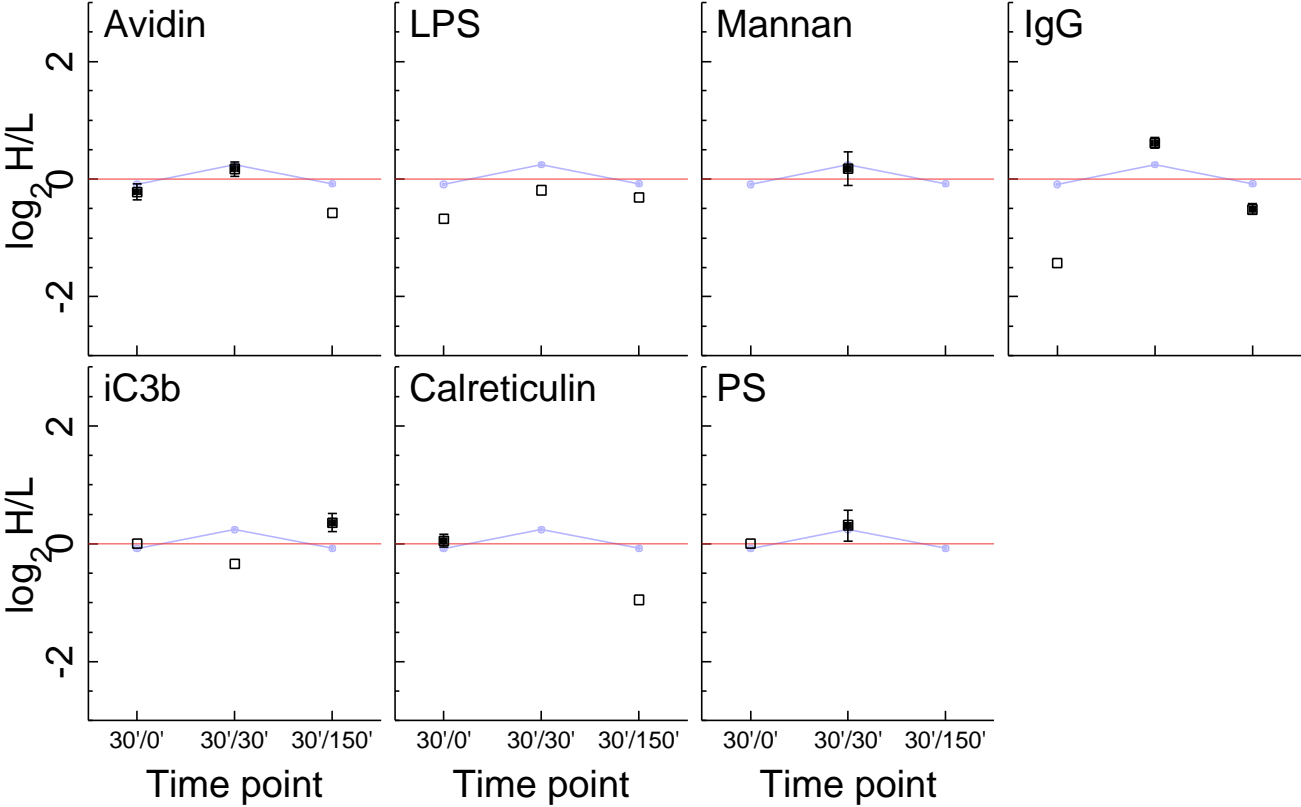

gla (Q8BGZ6)

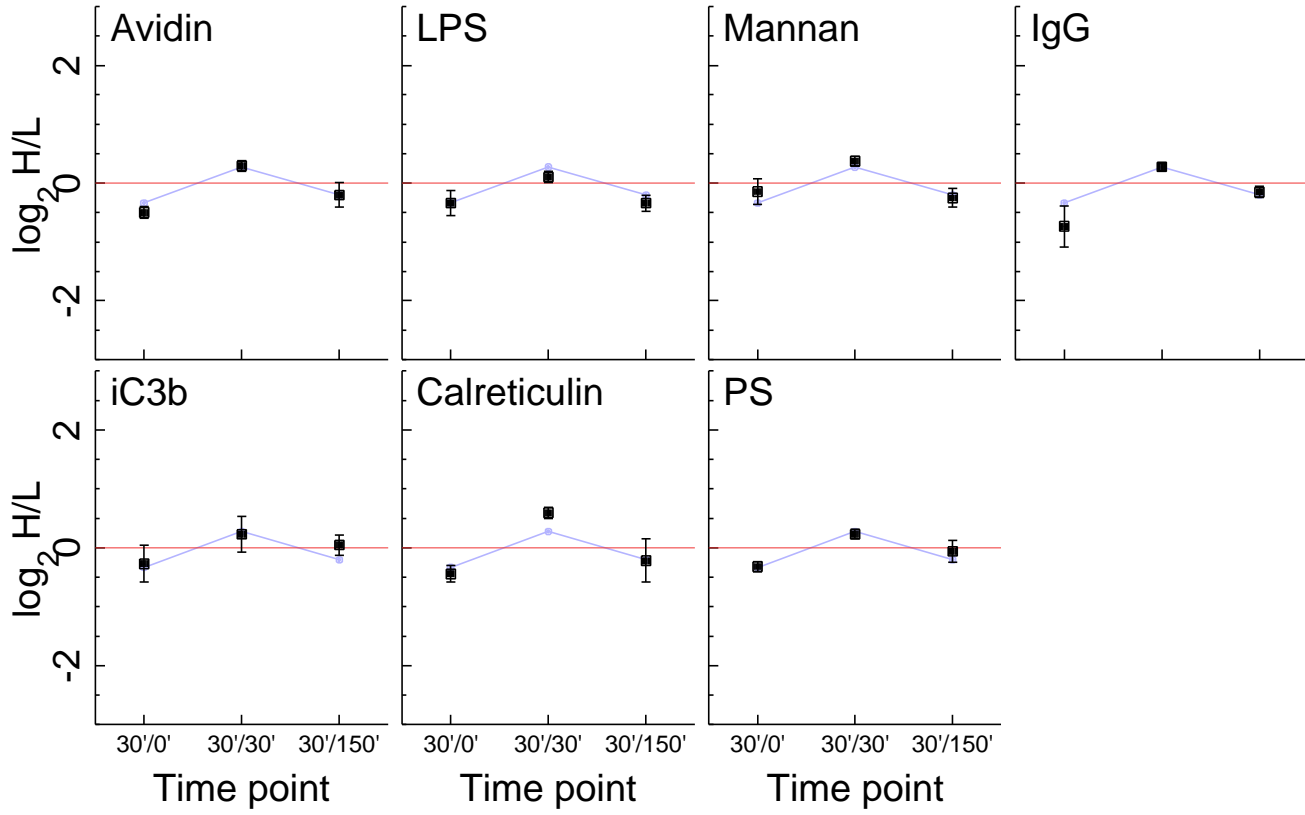

glb1l (Q8VC60)

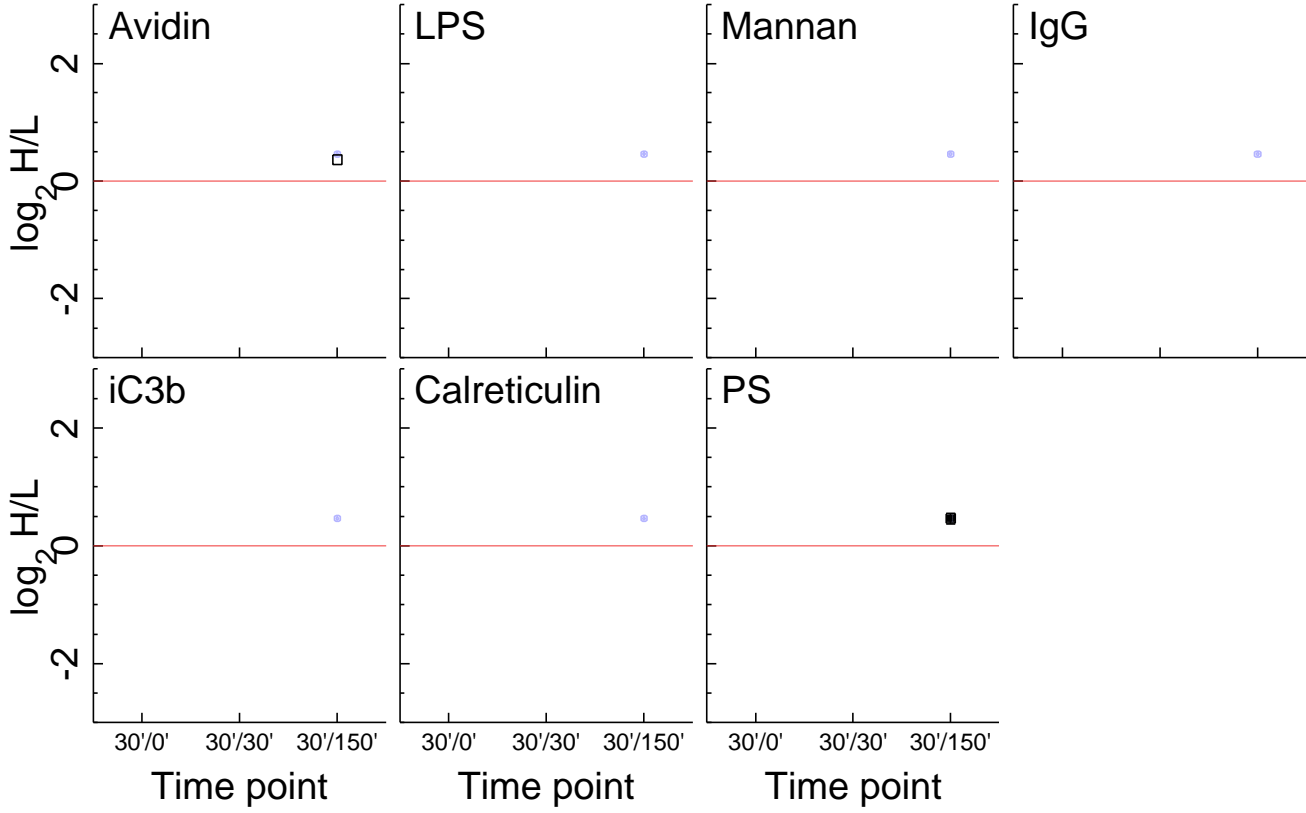

### glb1 (P23780)

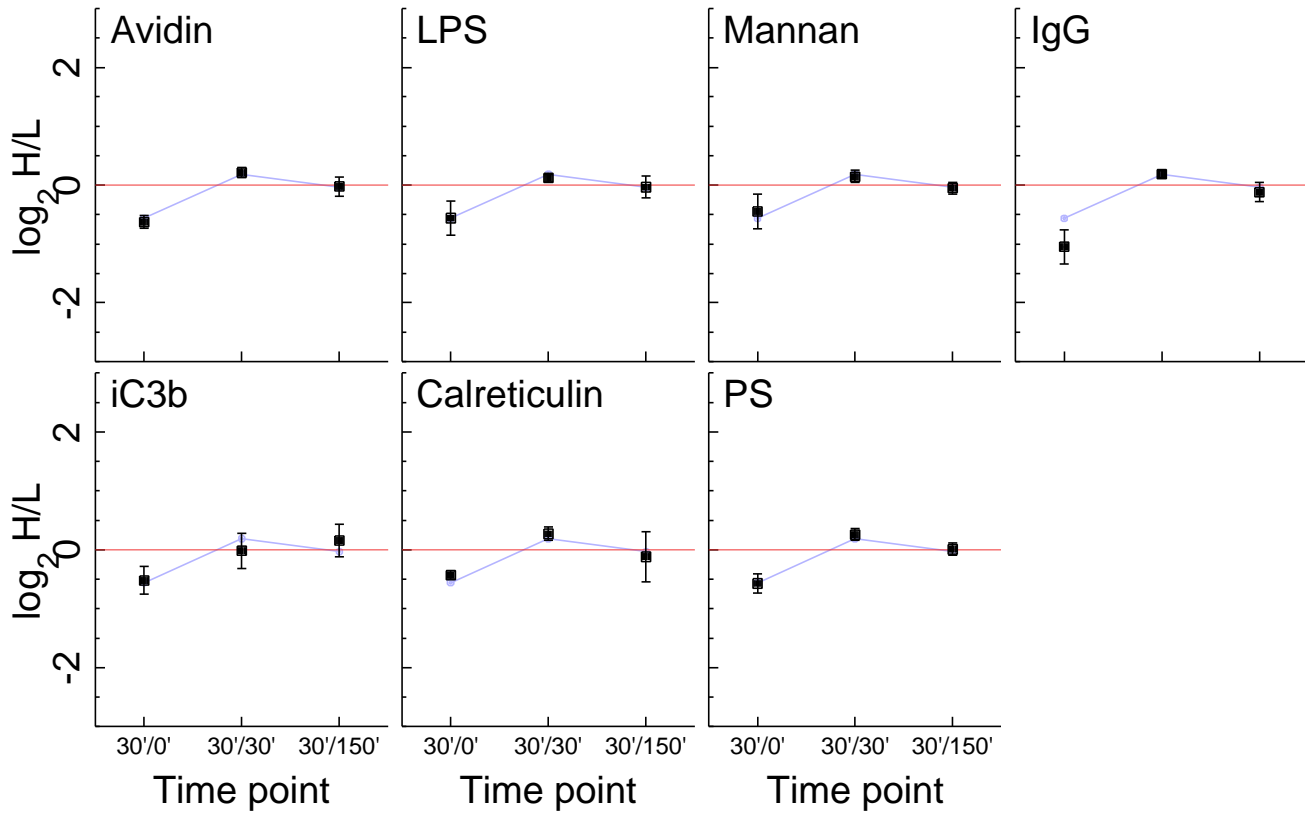

### glg1 (Q61543)

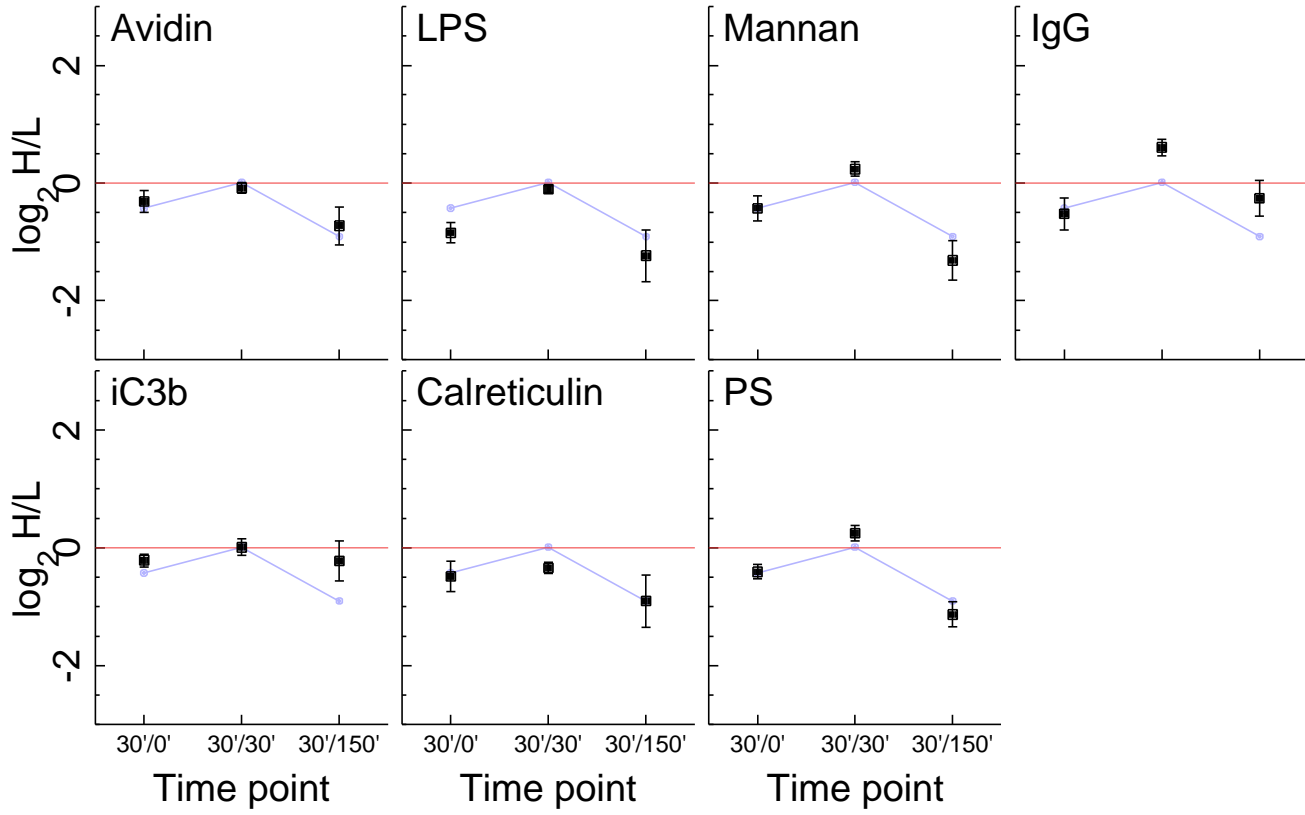



### glipr1 (Q9CWG1)

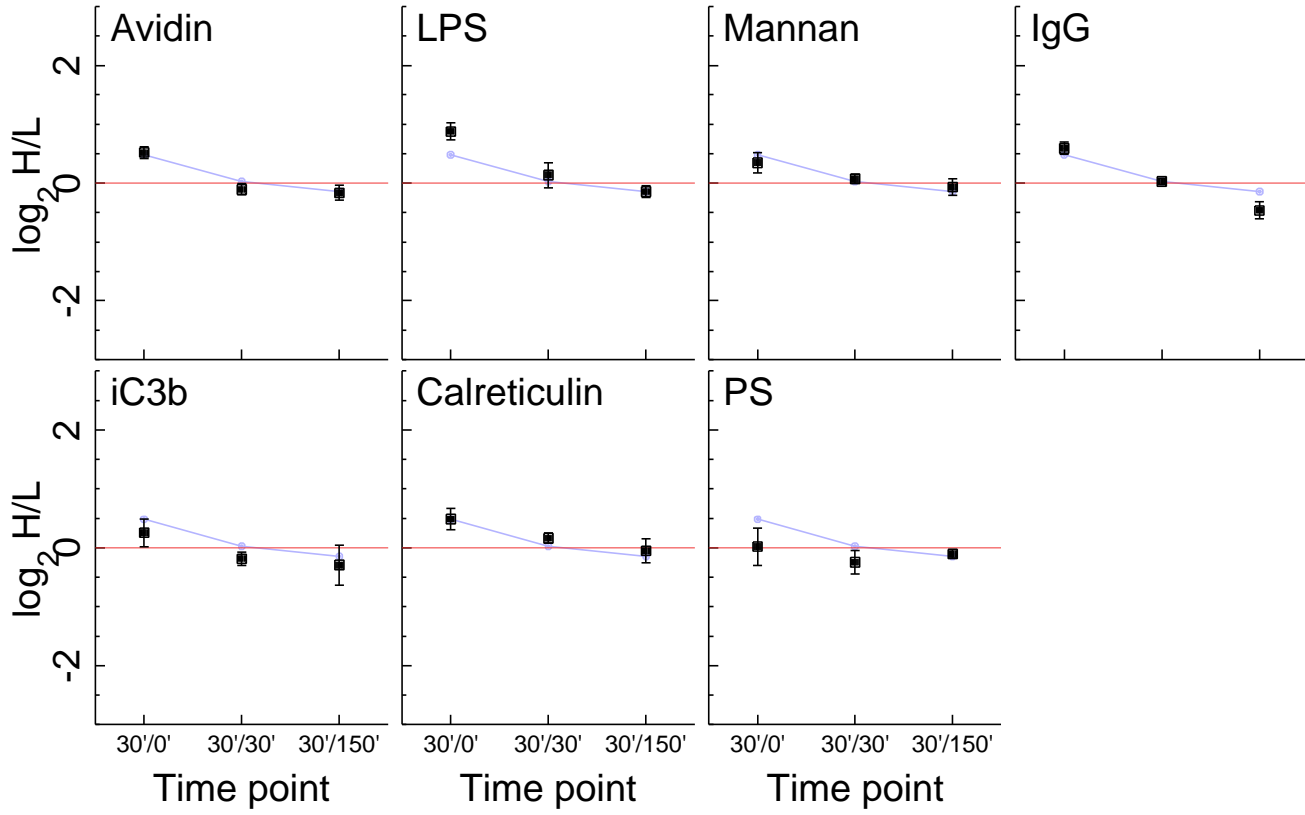

### glipr2 (Q9CYL5)

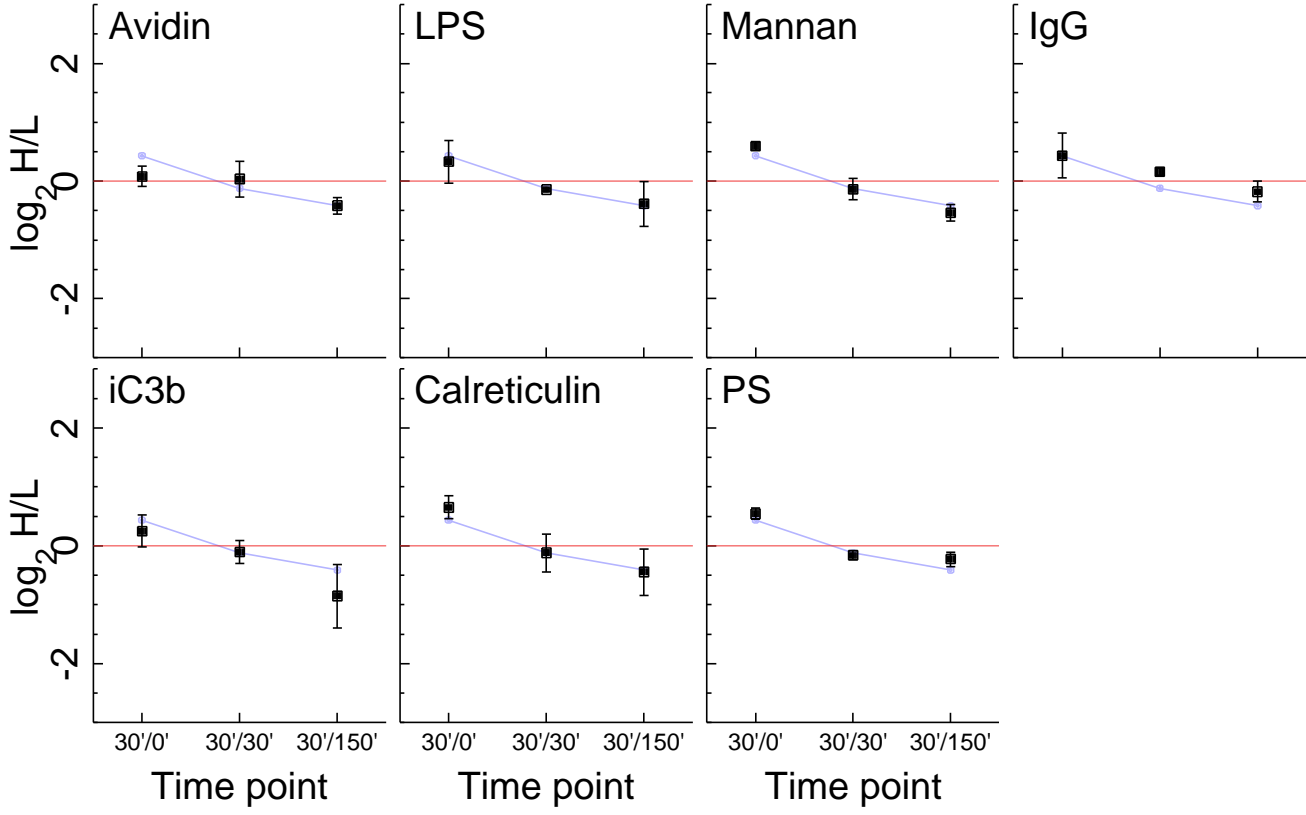

### gls (D3Z7P3)

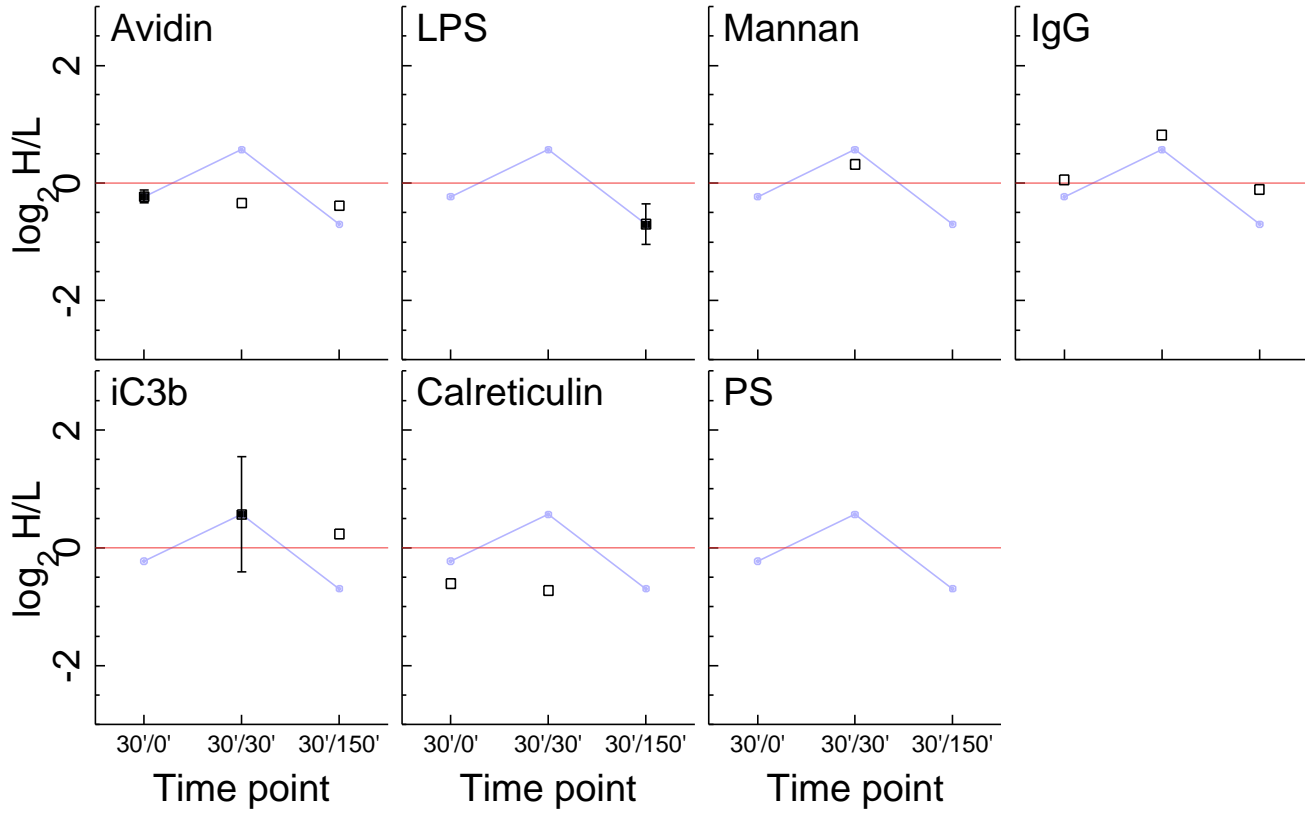

### glt25d1 (Q8K297)

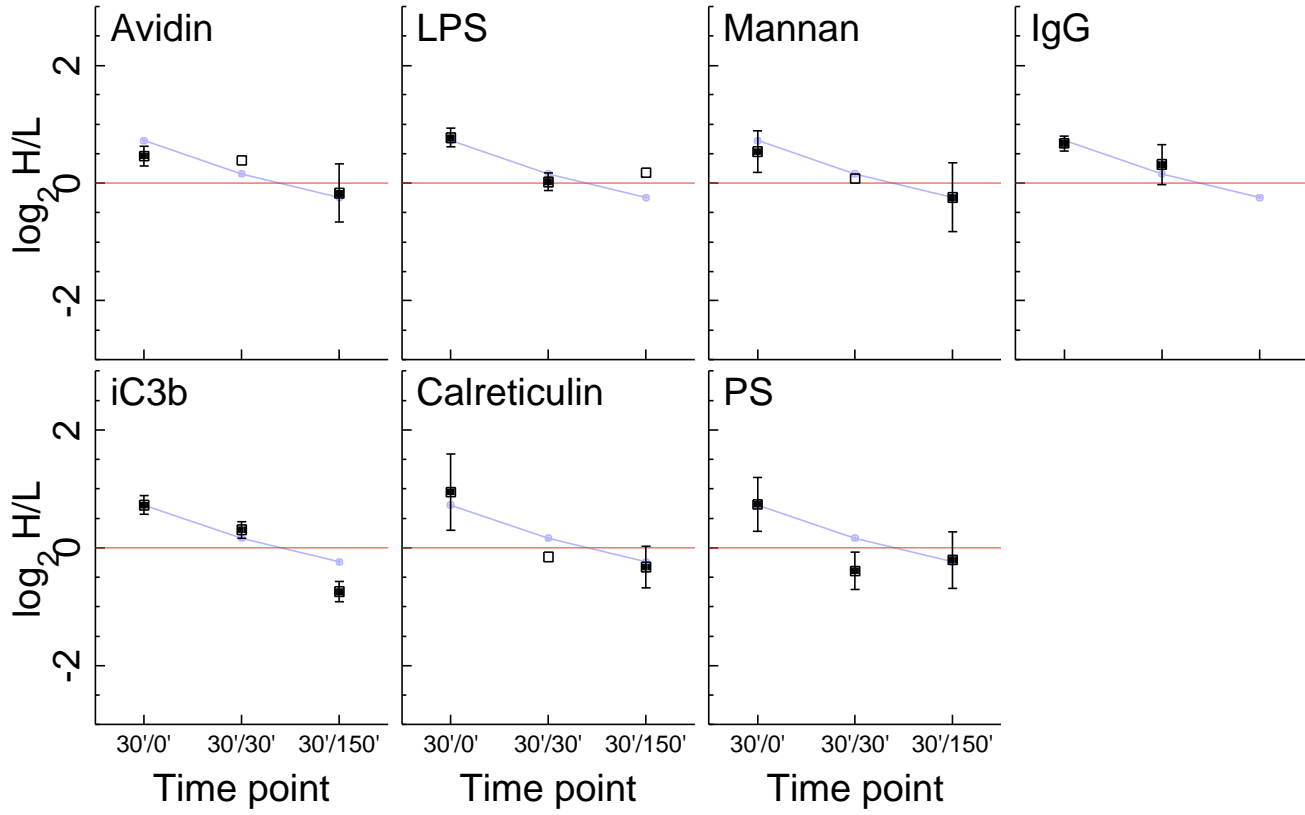

gltp (Q9JL62)

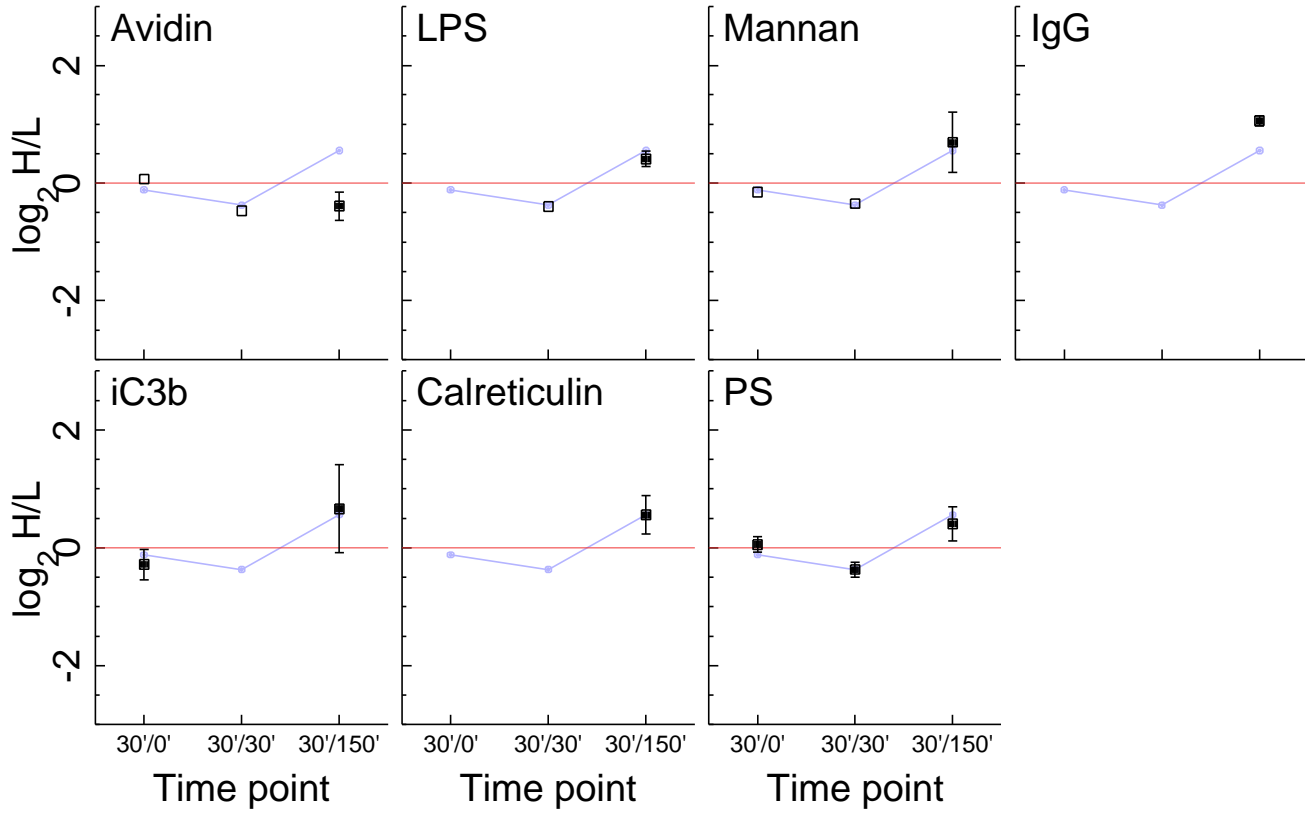

glud1 (P26443)

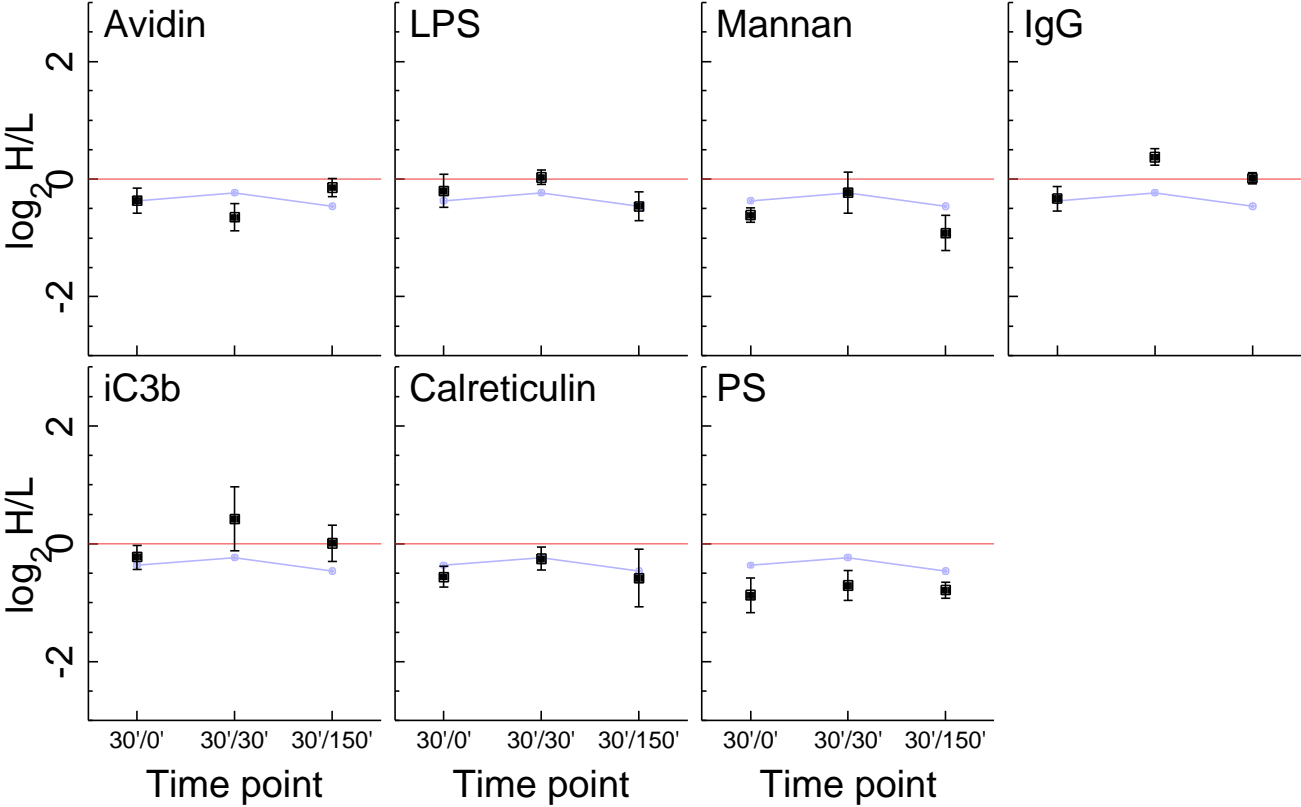

### gm10036 (E9PYL9)

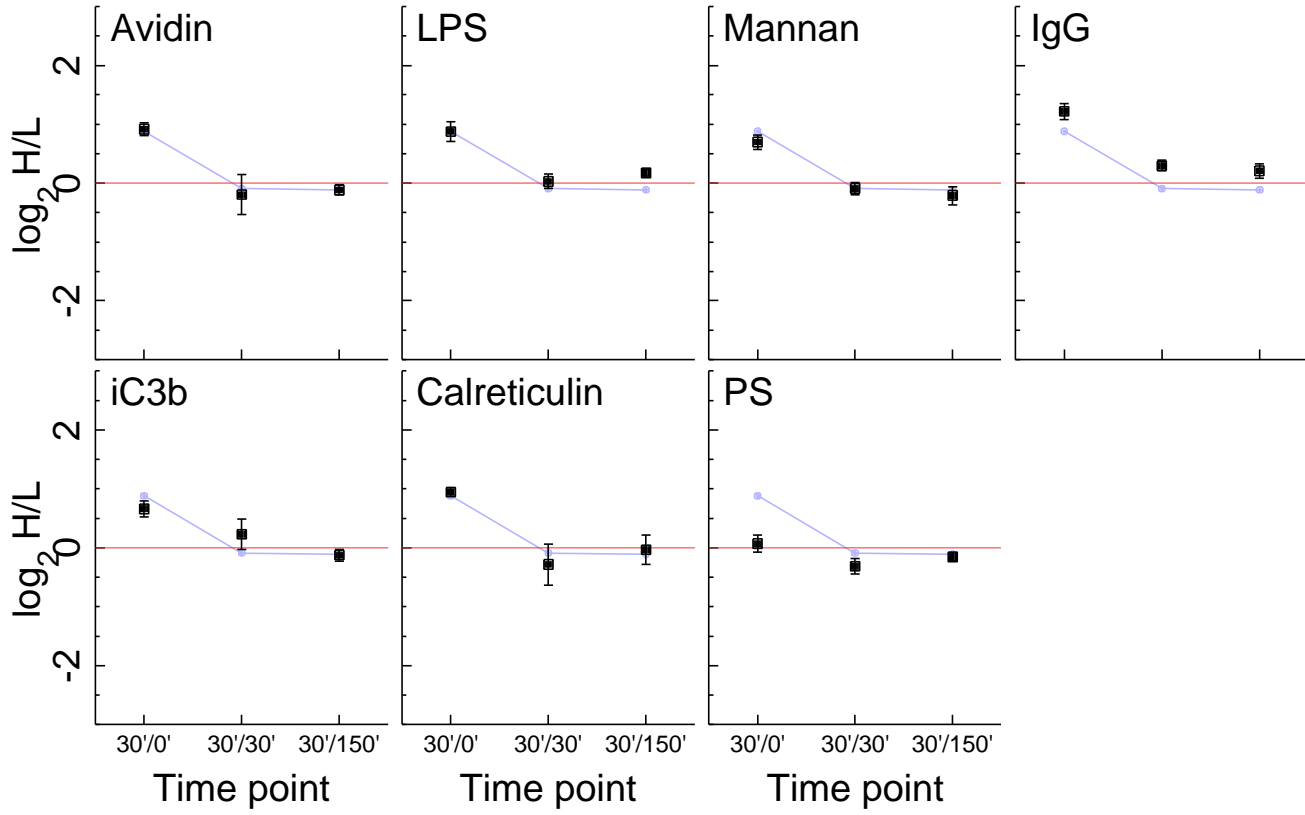

gm10119 (D3Z6C3)

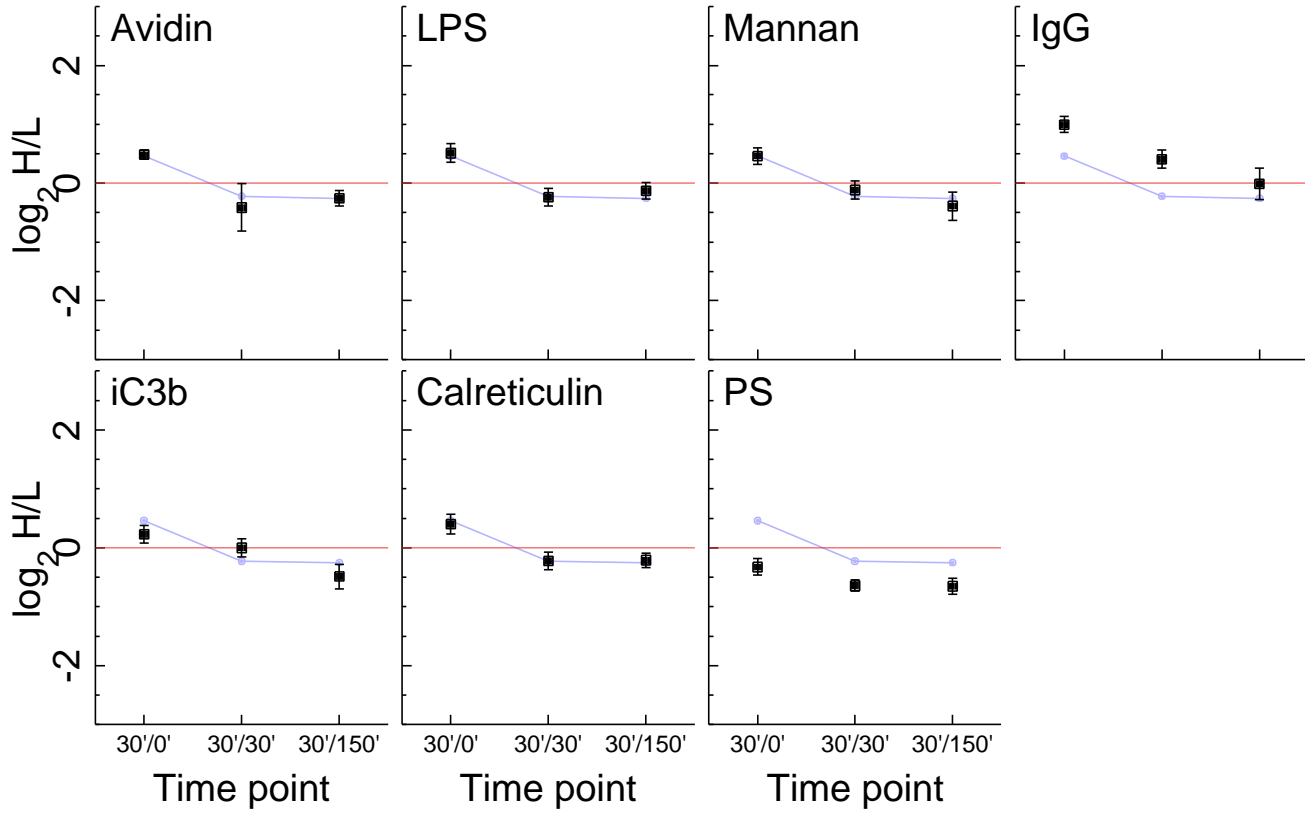



# gm10126 (D3YYL7)

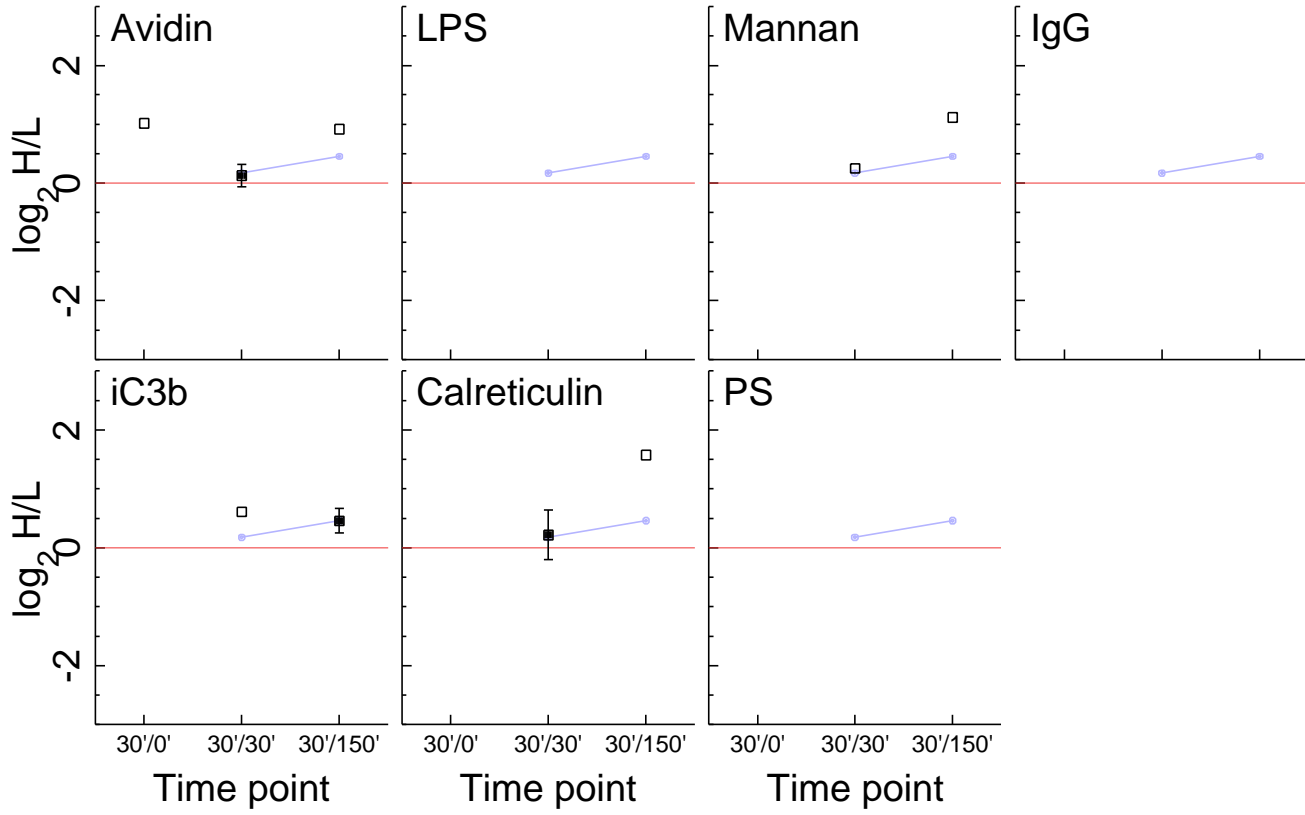

gm10320 (E9PW43)

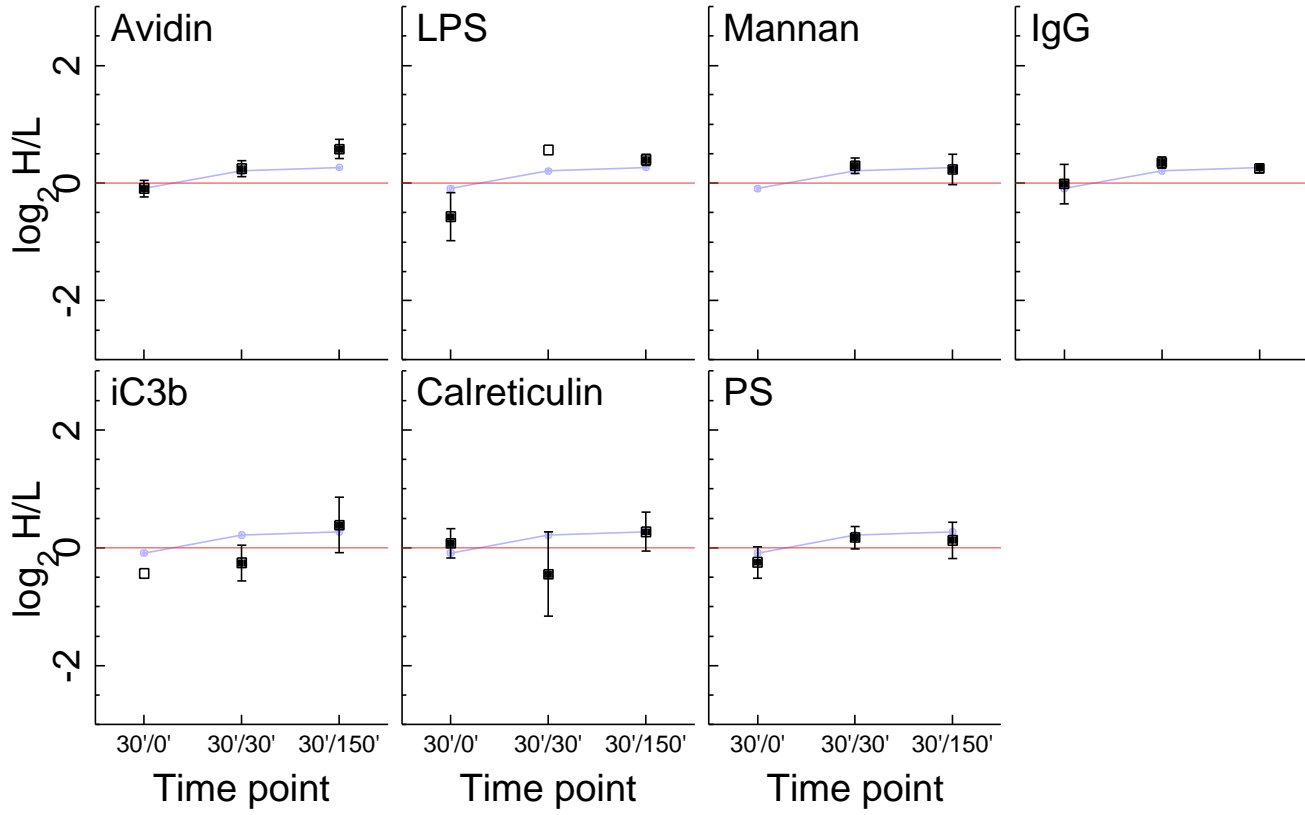

gm13646 (Q8CGP2)

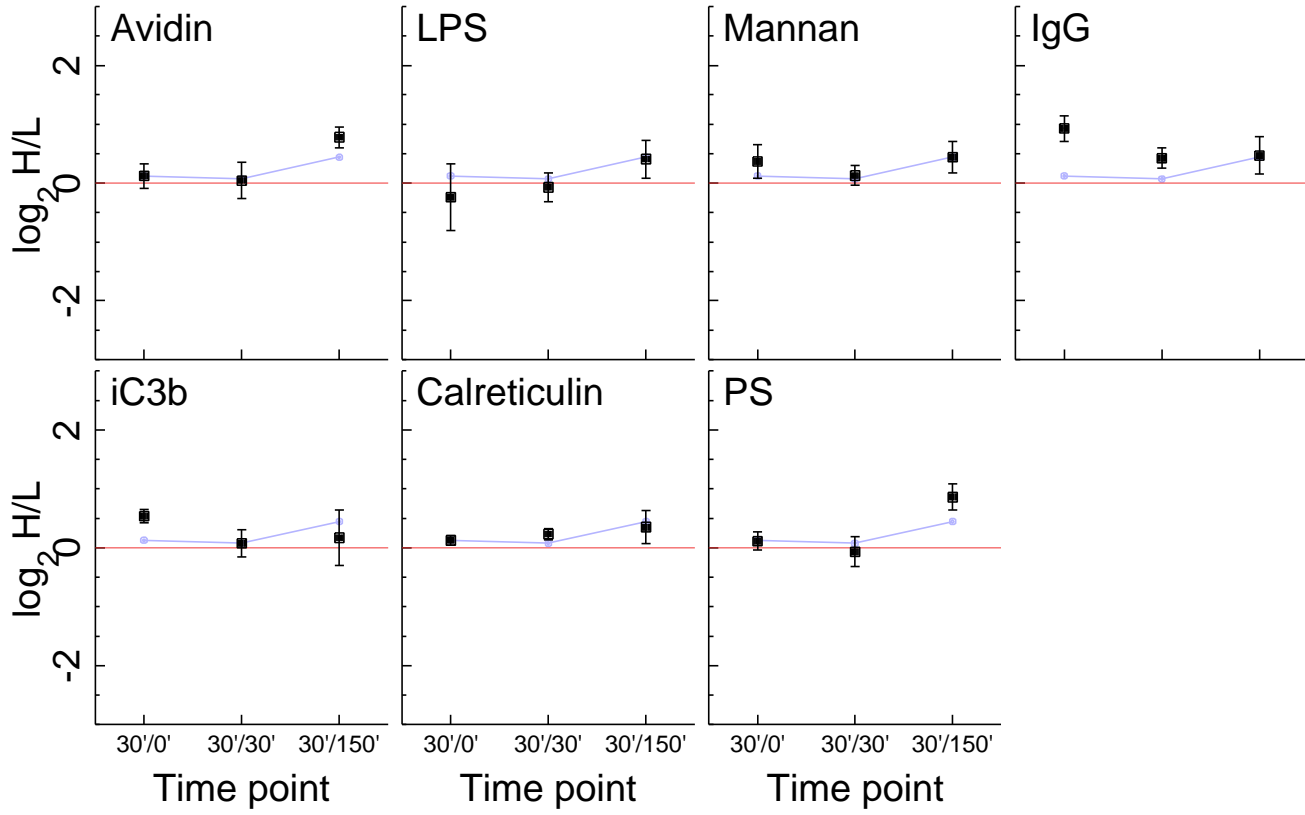

gm14548 (E9Q1Z6)

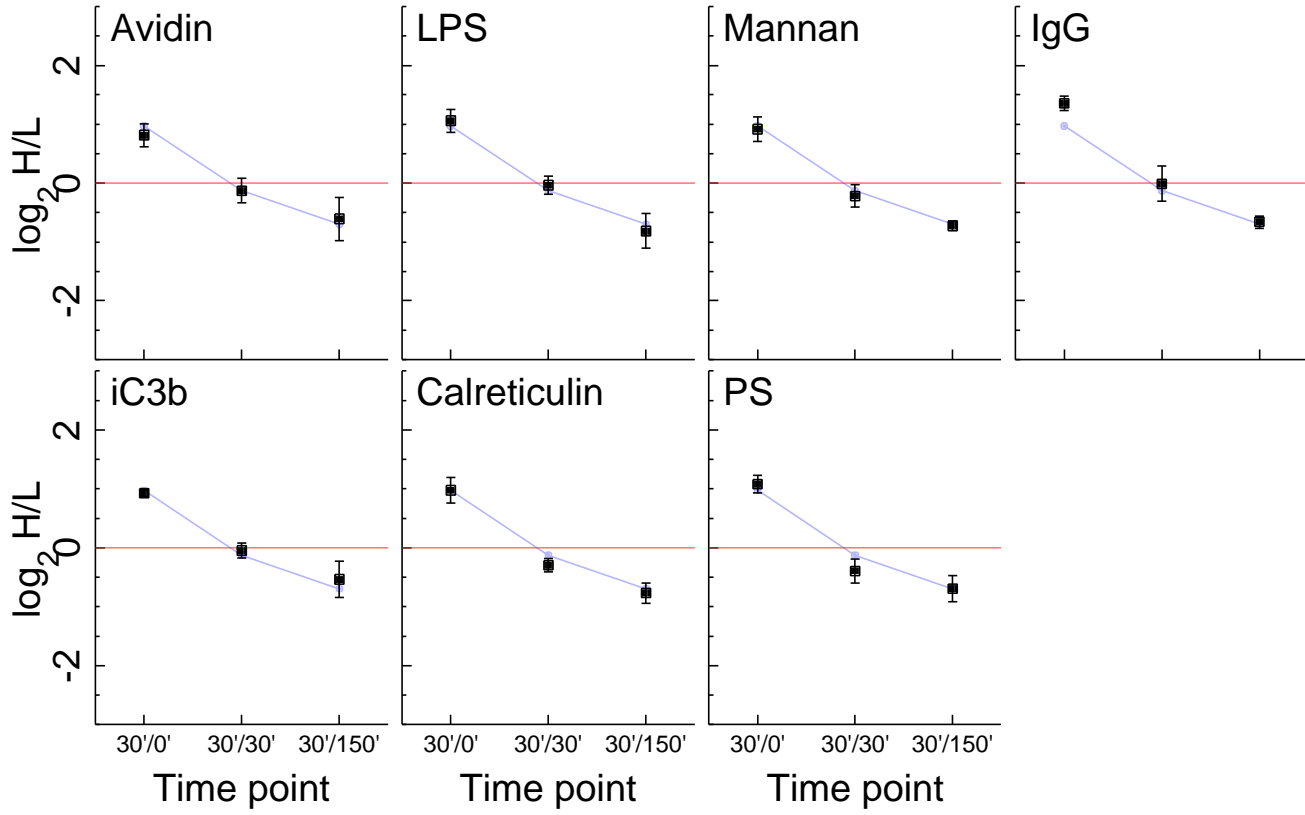

gm16477 (D3Z3R0)

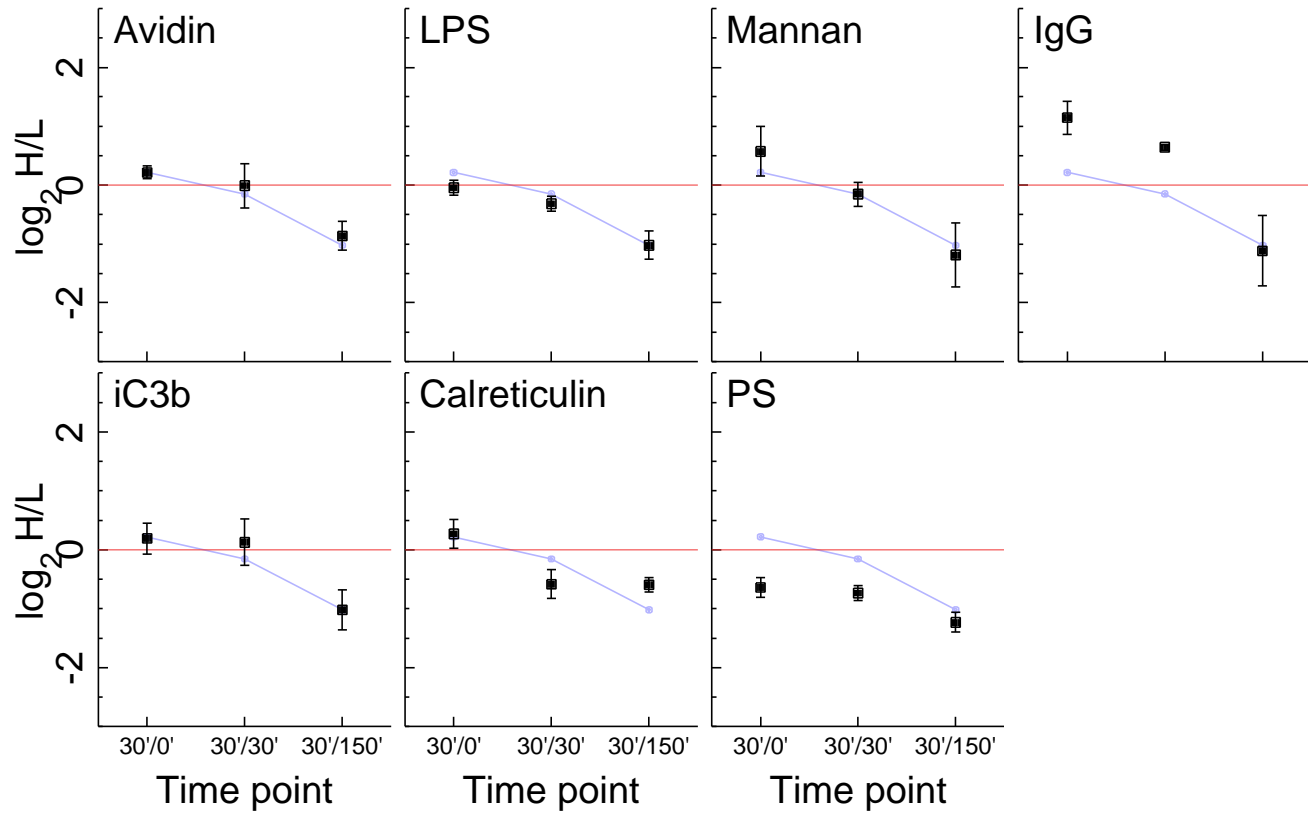

### gm17352 (F6YVP7)

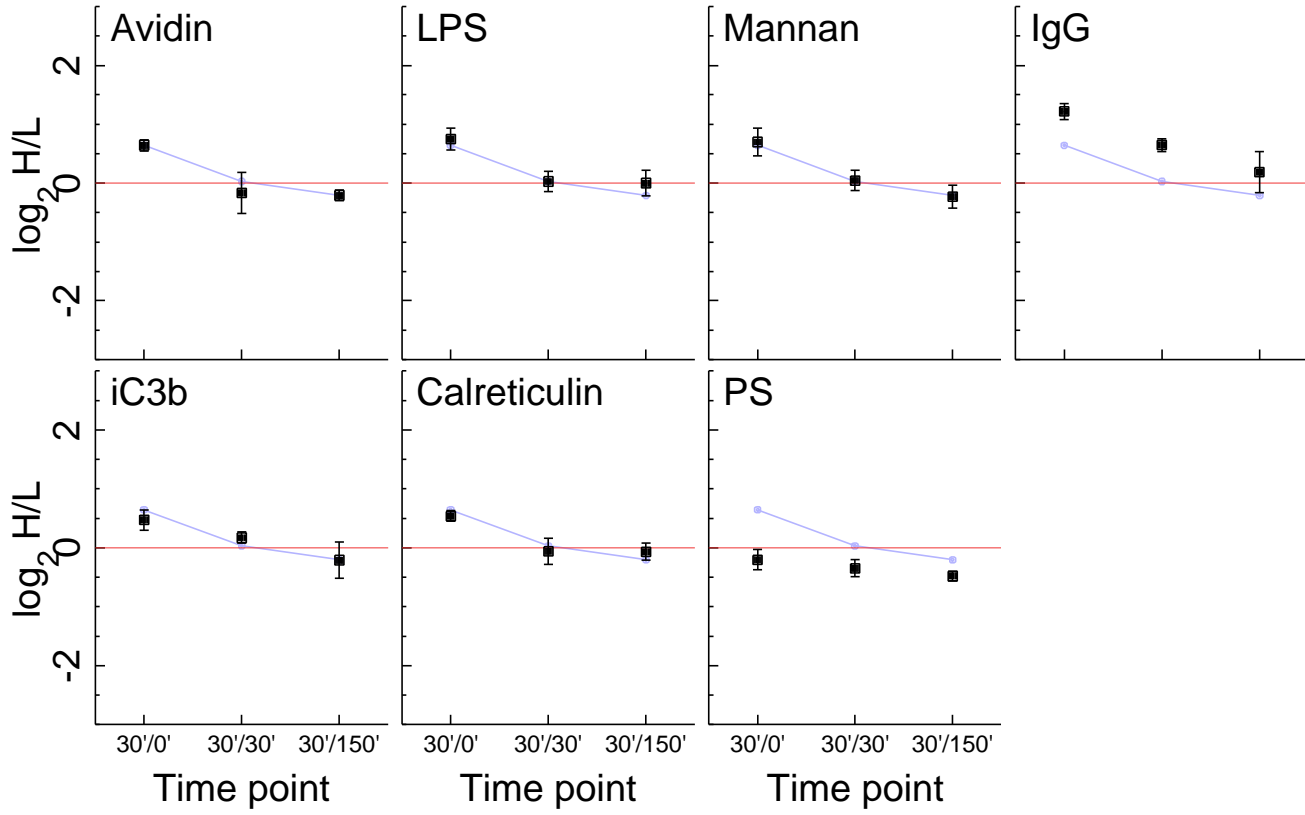

gm20390 (E9PZF0)

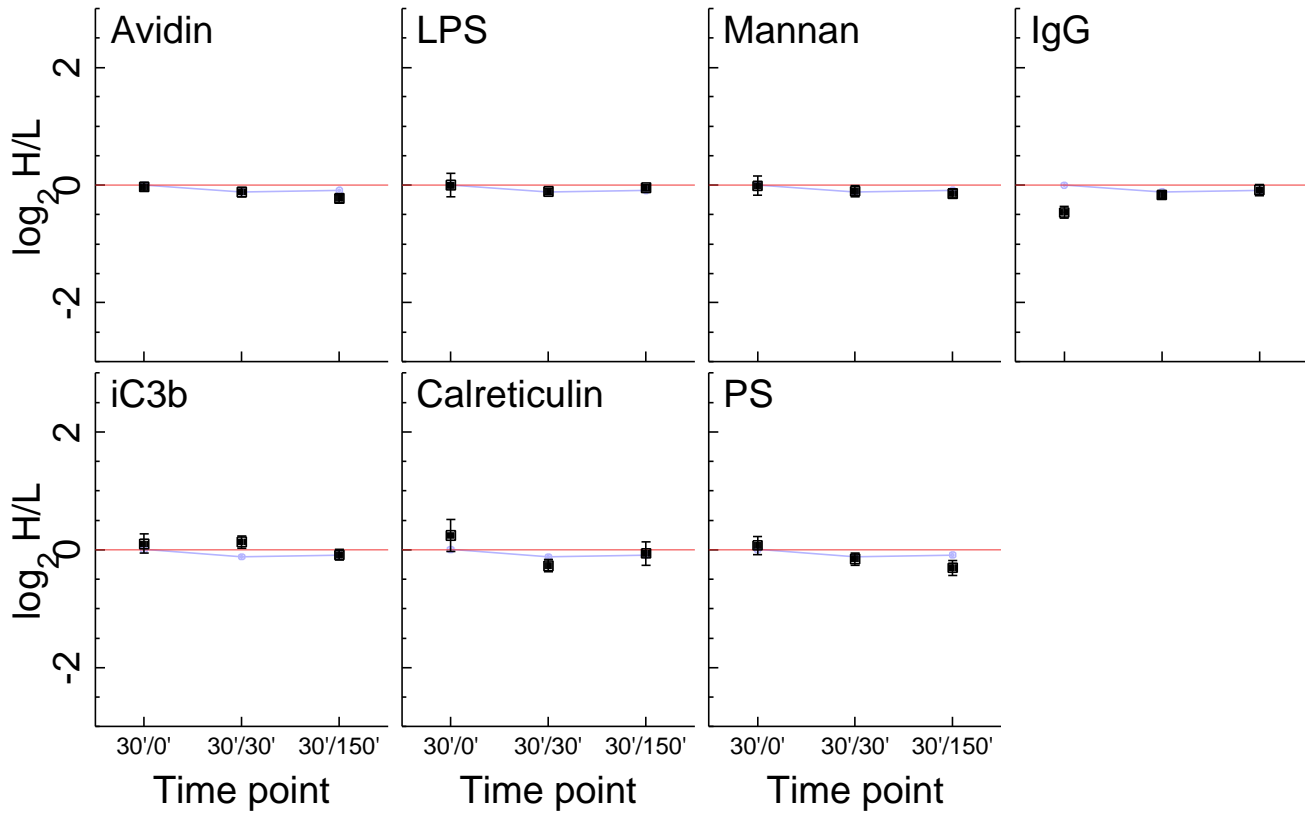

gm20425 (E9Q035)

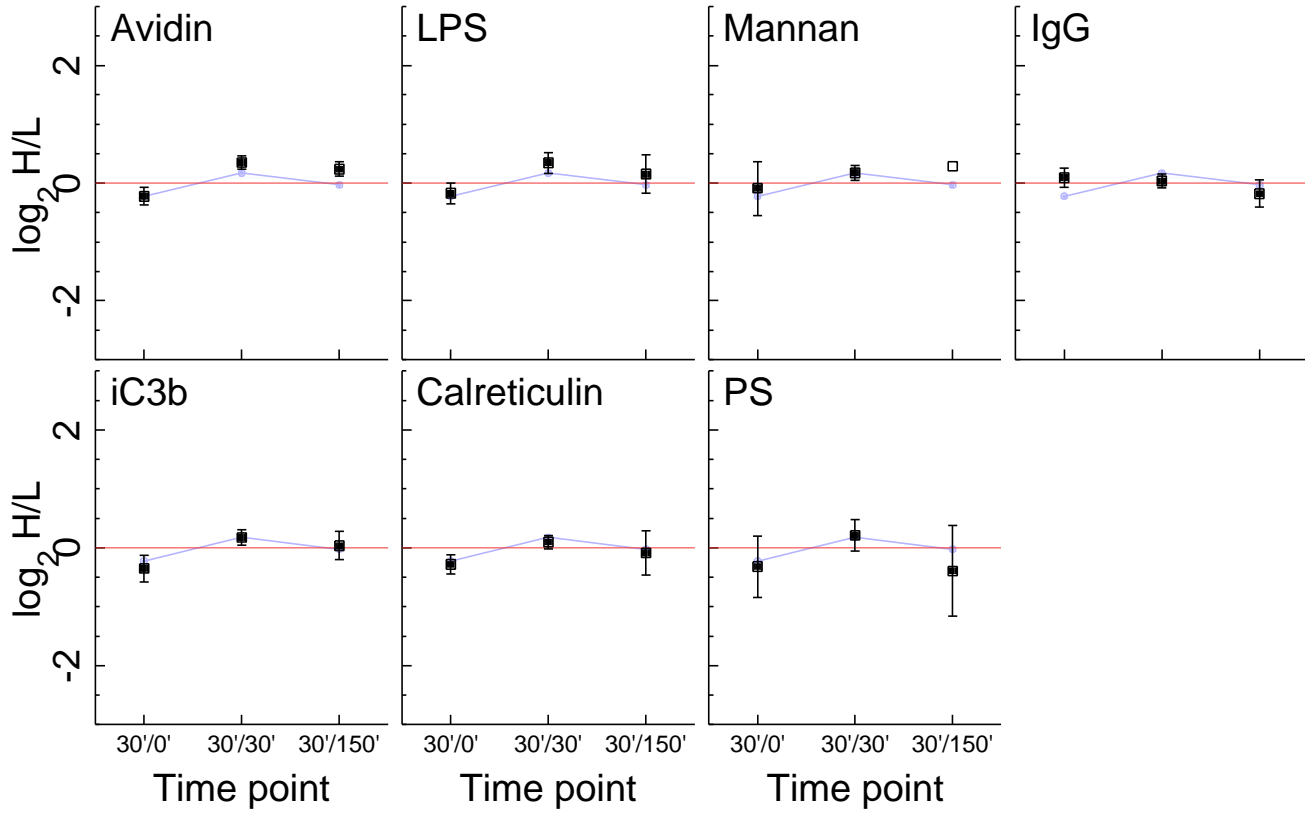



gm20431 (E9PY39)

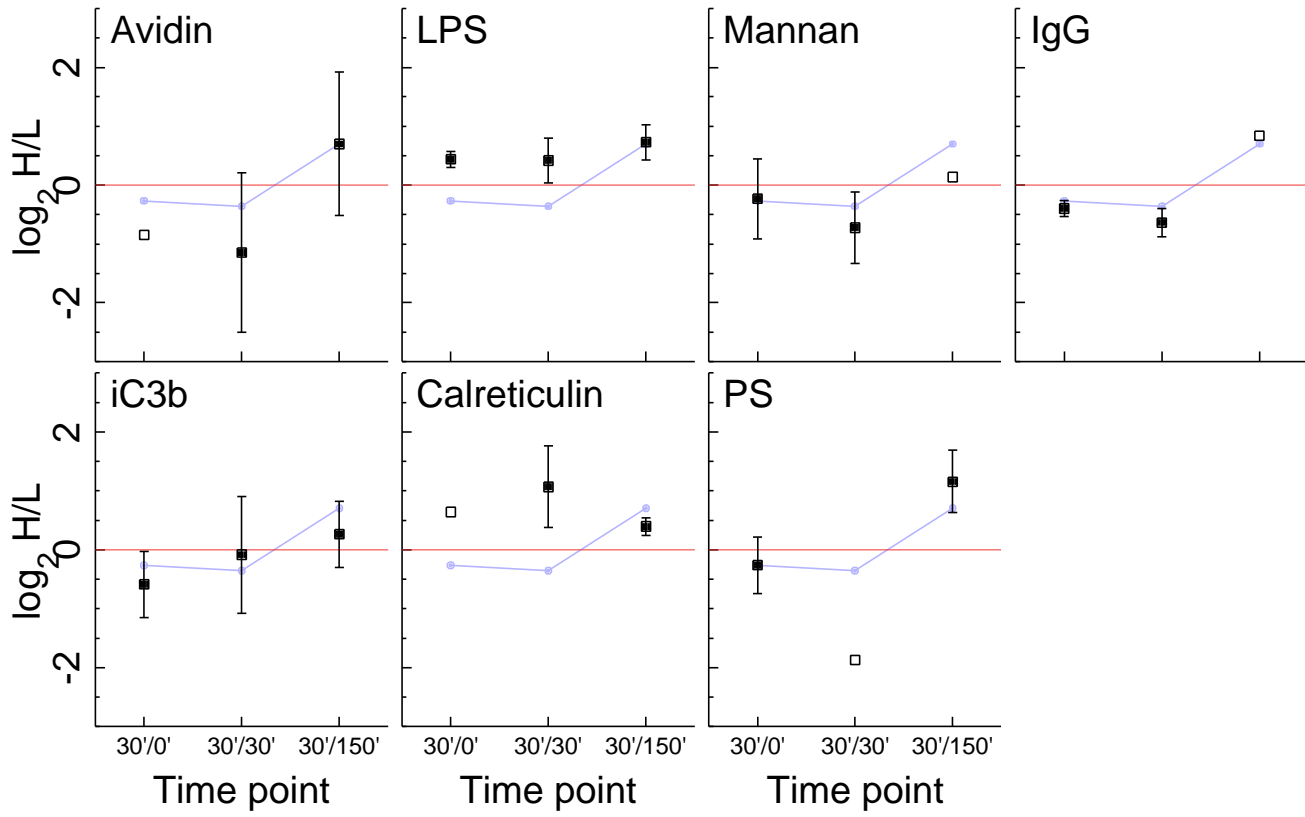

gm20489 (A2AGH5)

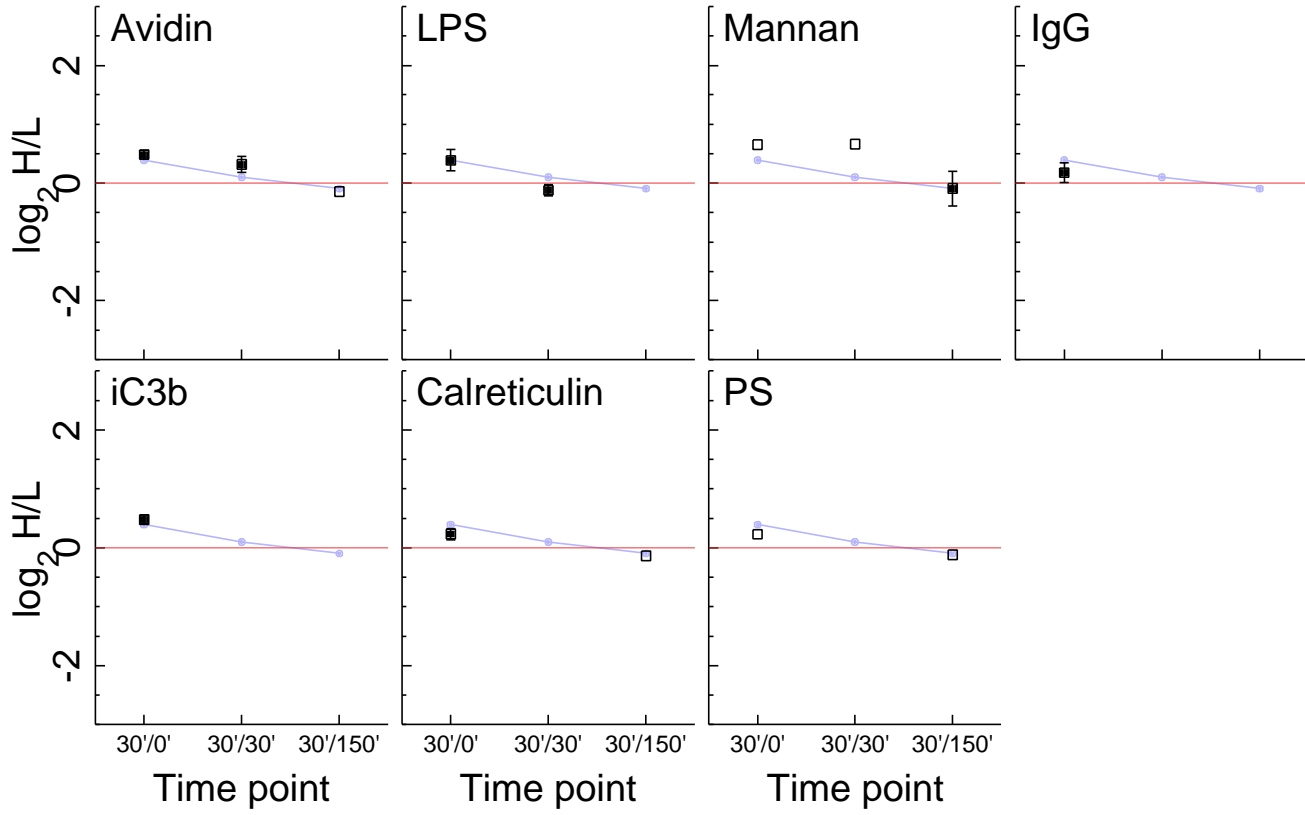

gm20498 (E9PVN6)

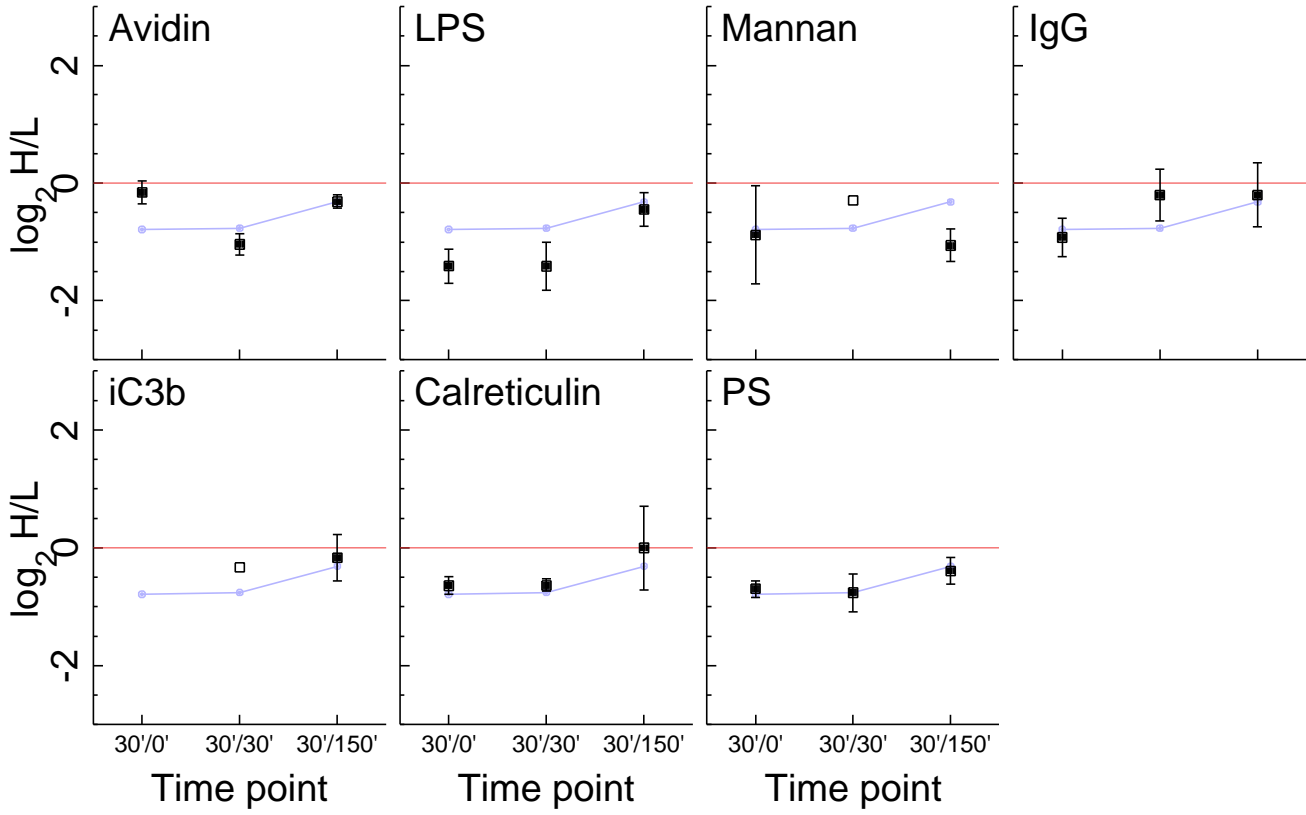

### gm2382 (E9PXP2)

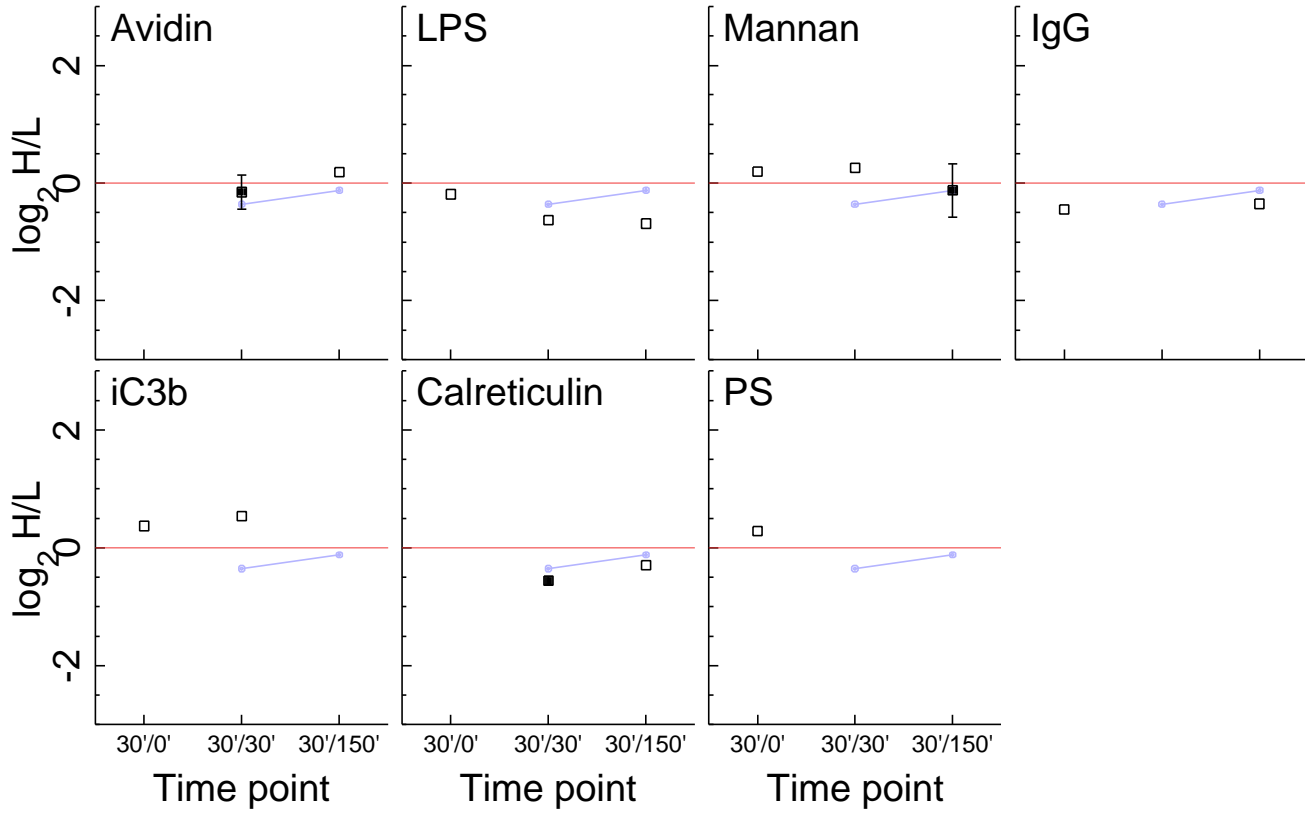

### gm2a (Q60648)

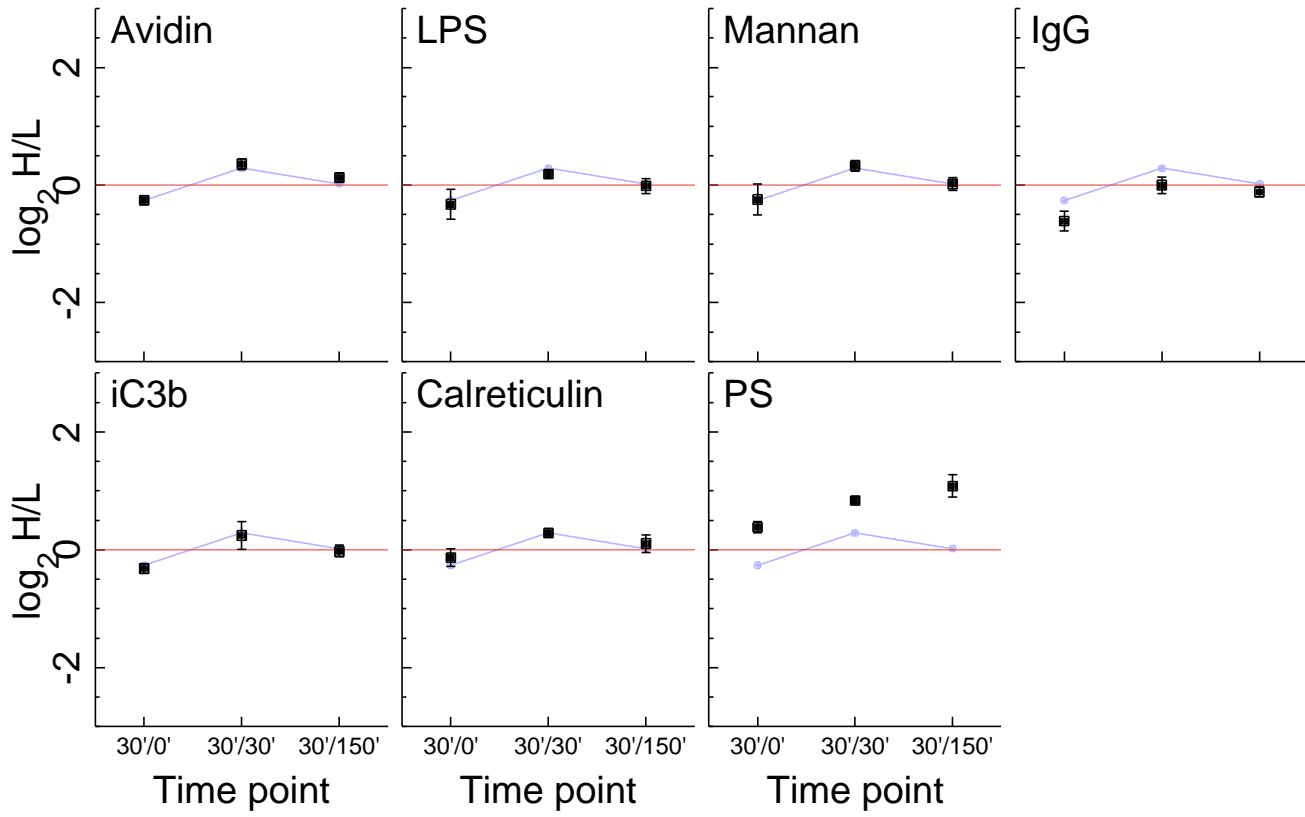

### gm5431 (Q5NCB3)

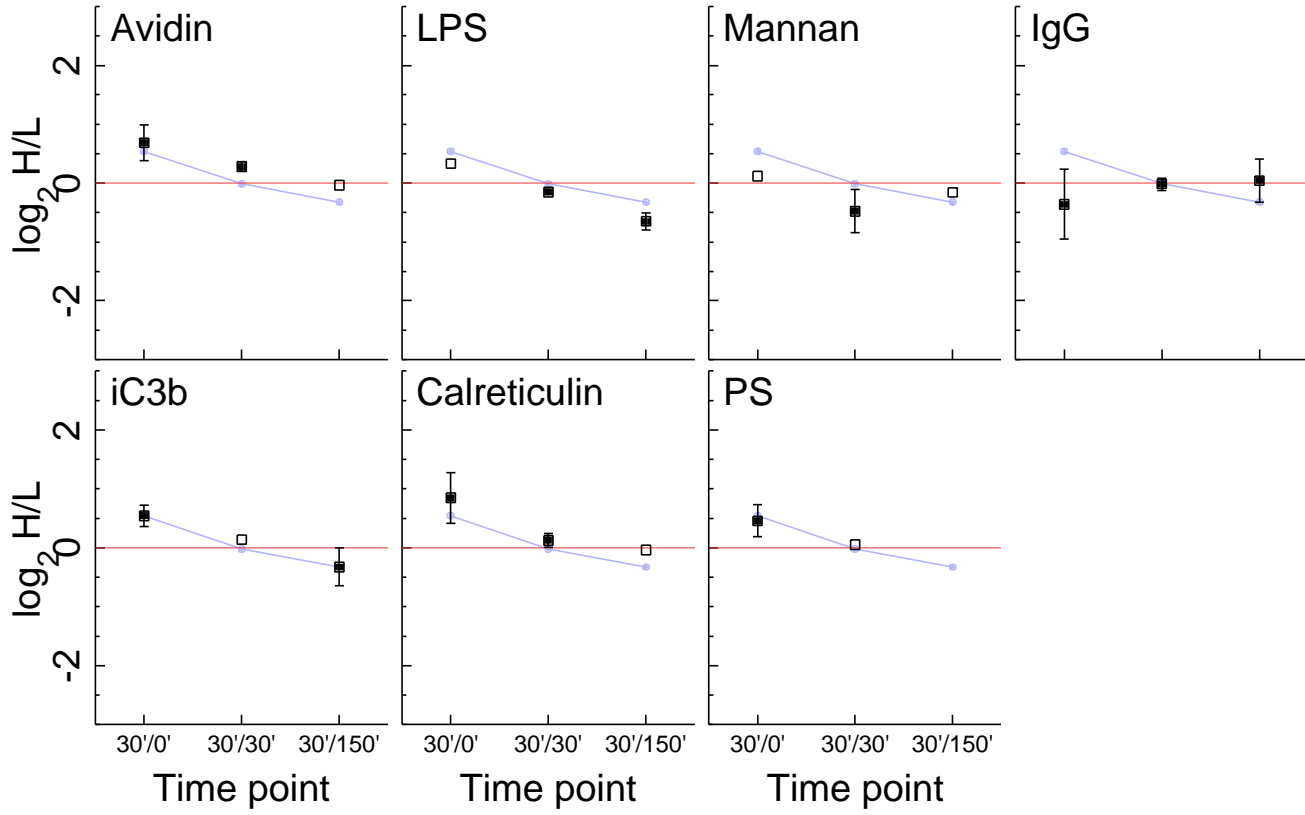

gm5576 (E9PV04)

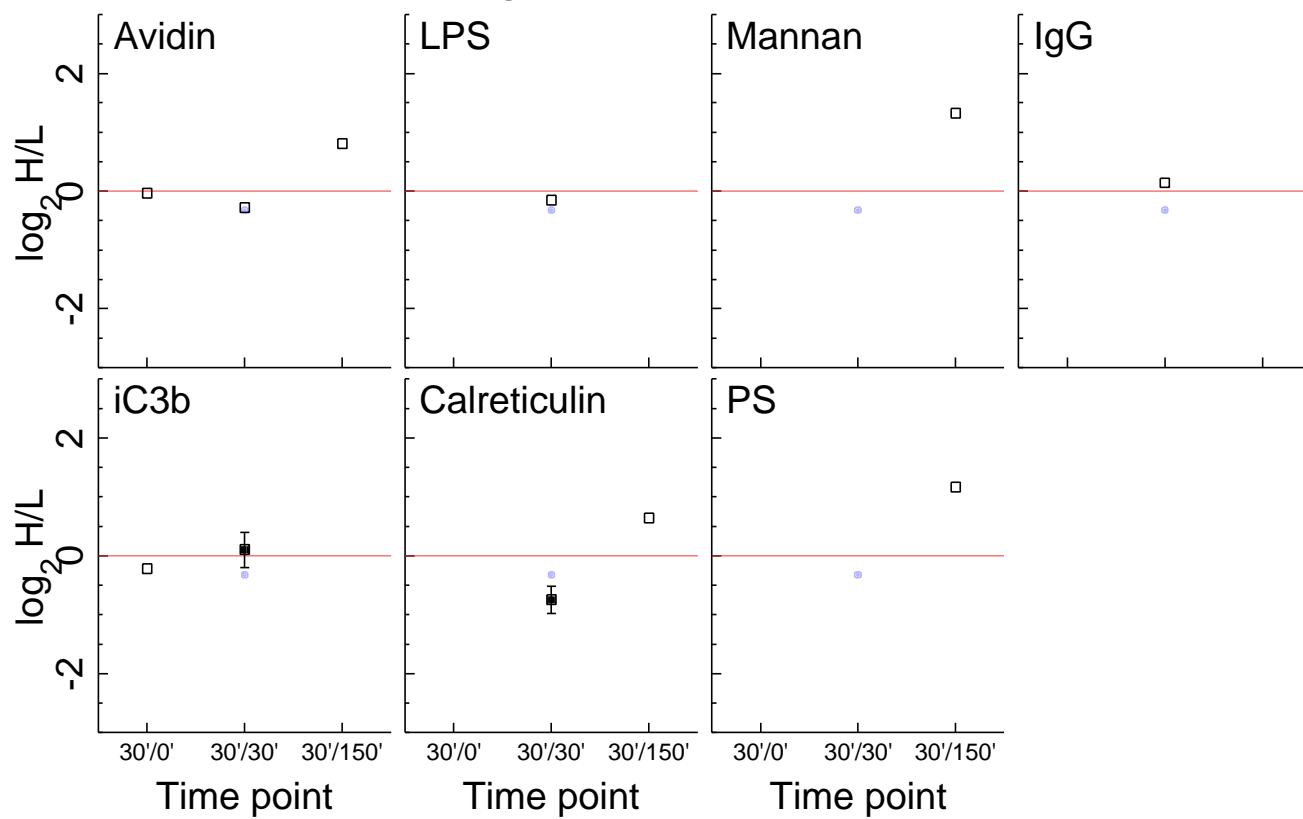

gm6055 (G3XA41)

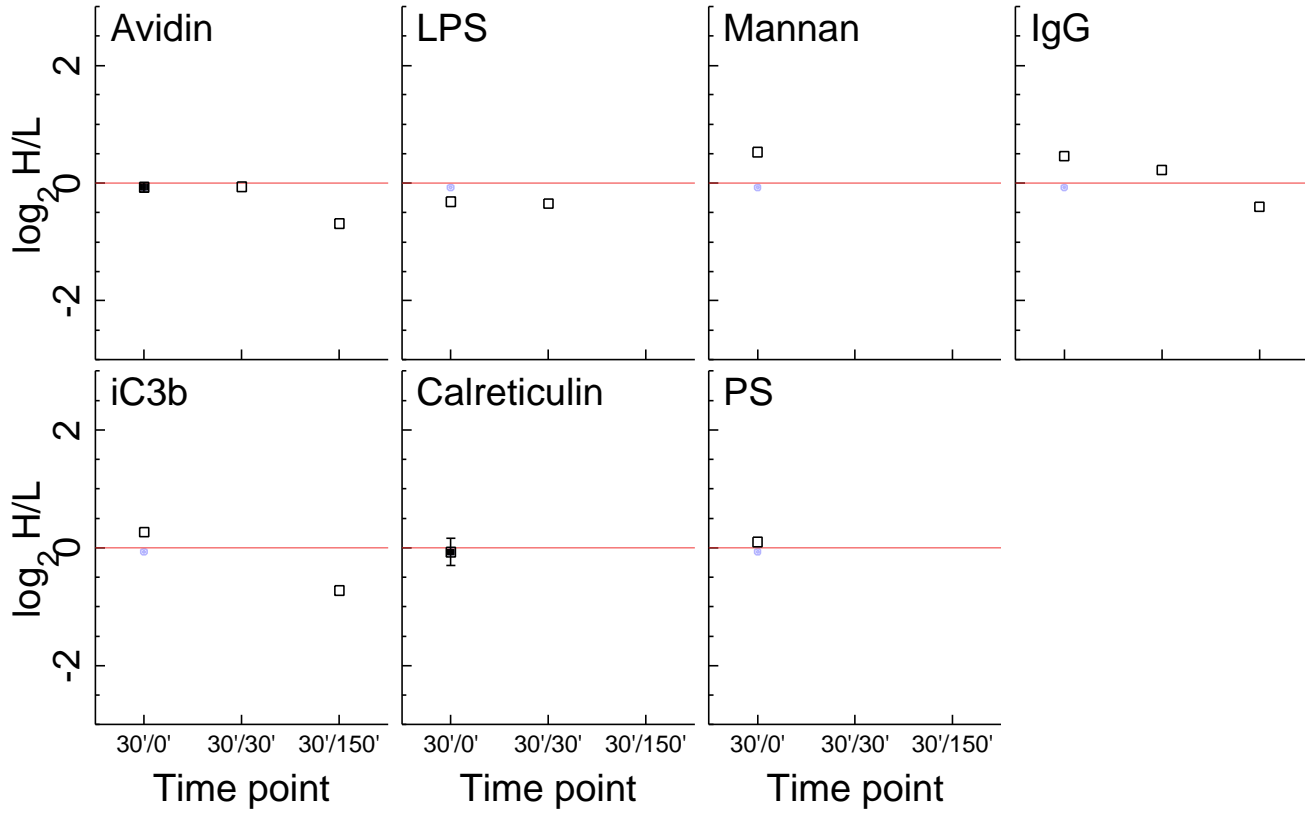



gm6377 (Q8BHV4)

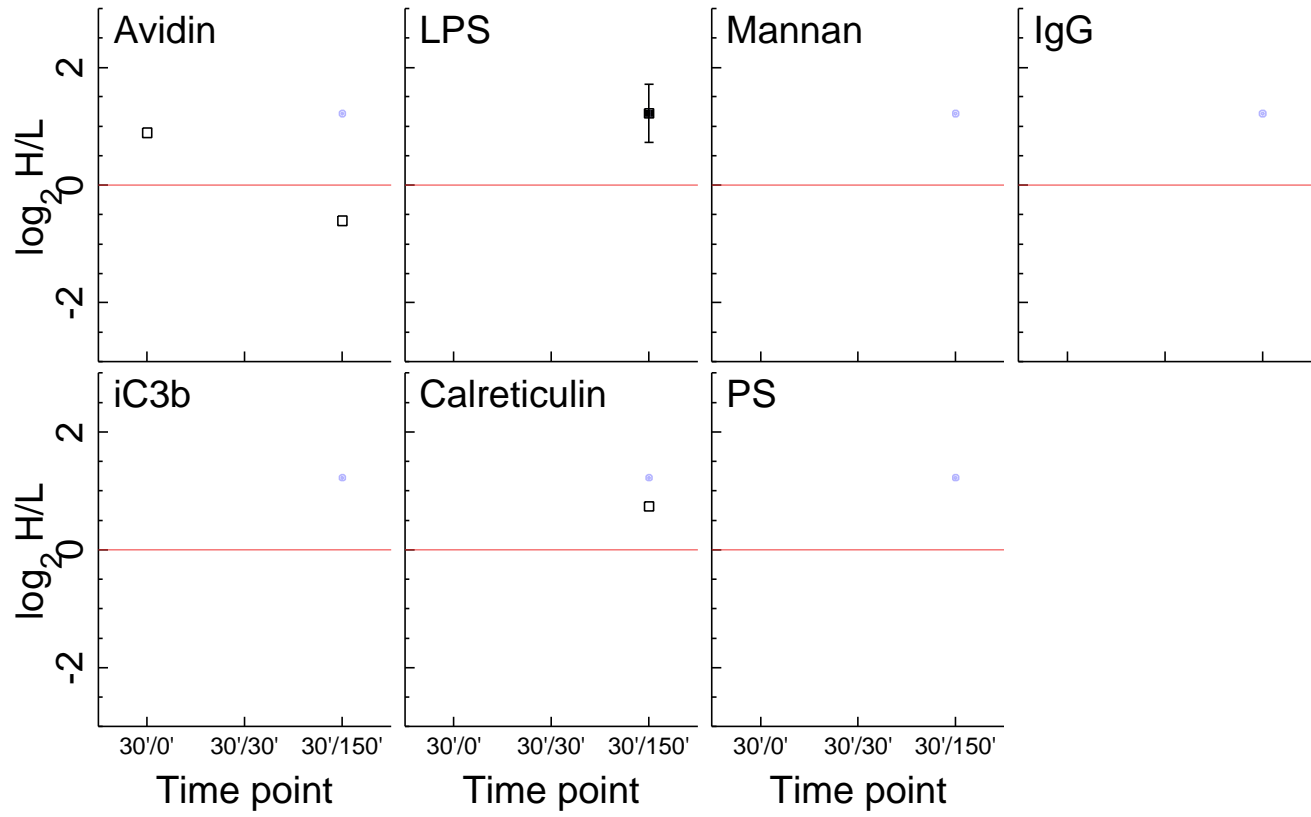

gm6788 (G5E8Z1)

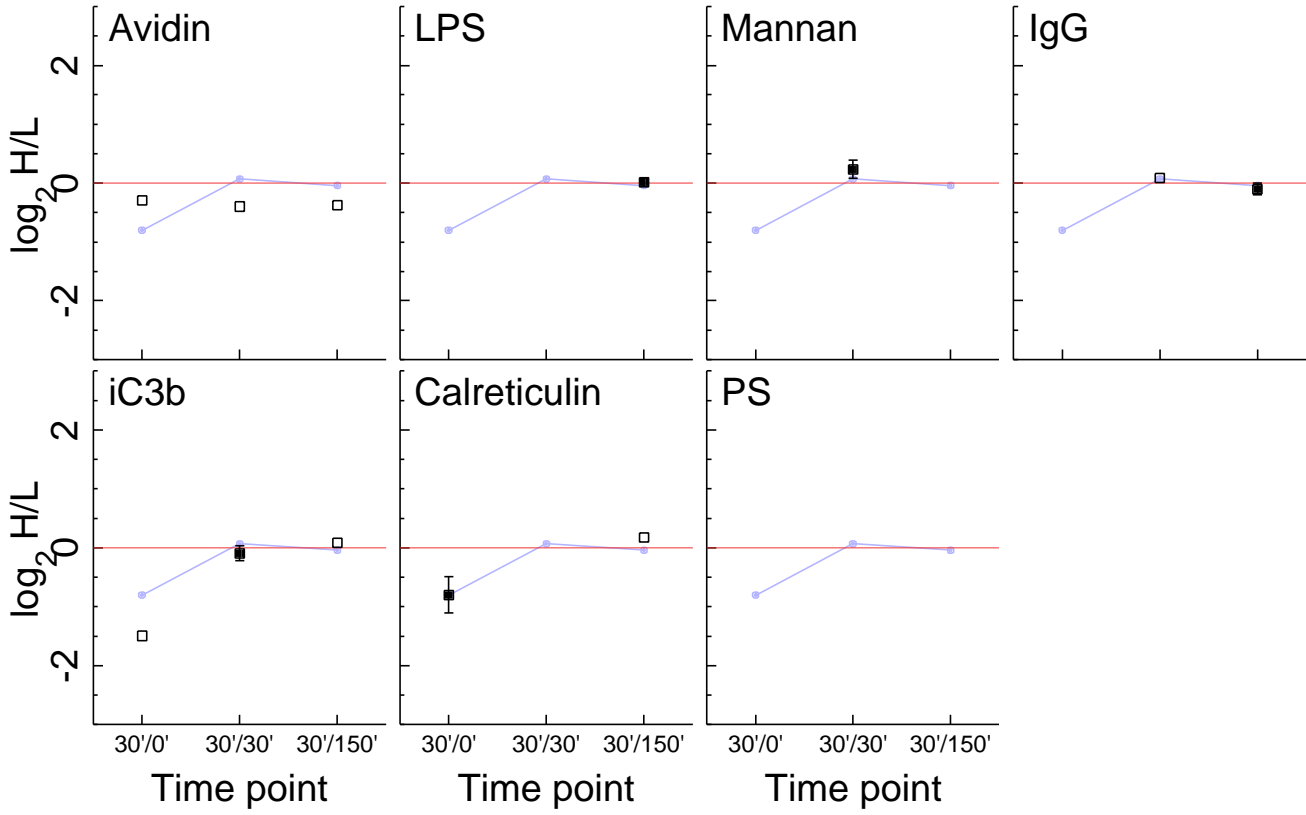

### gm8394 (D3YX79)

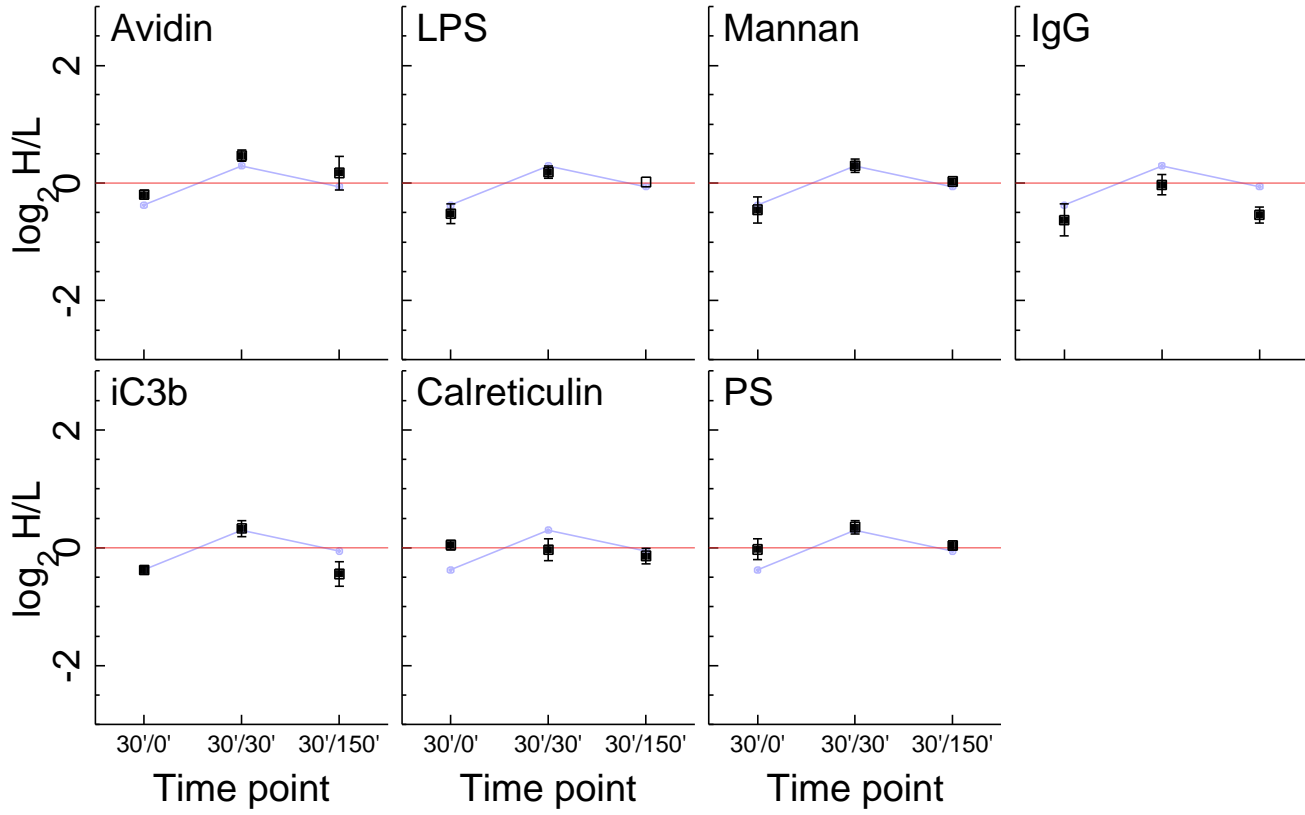

### gm9755 (D3YVN7)

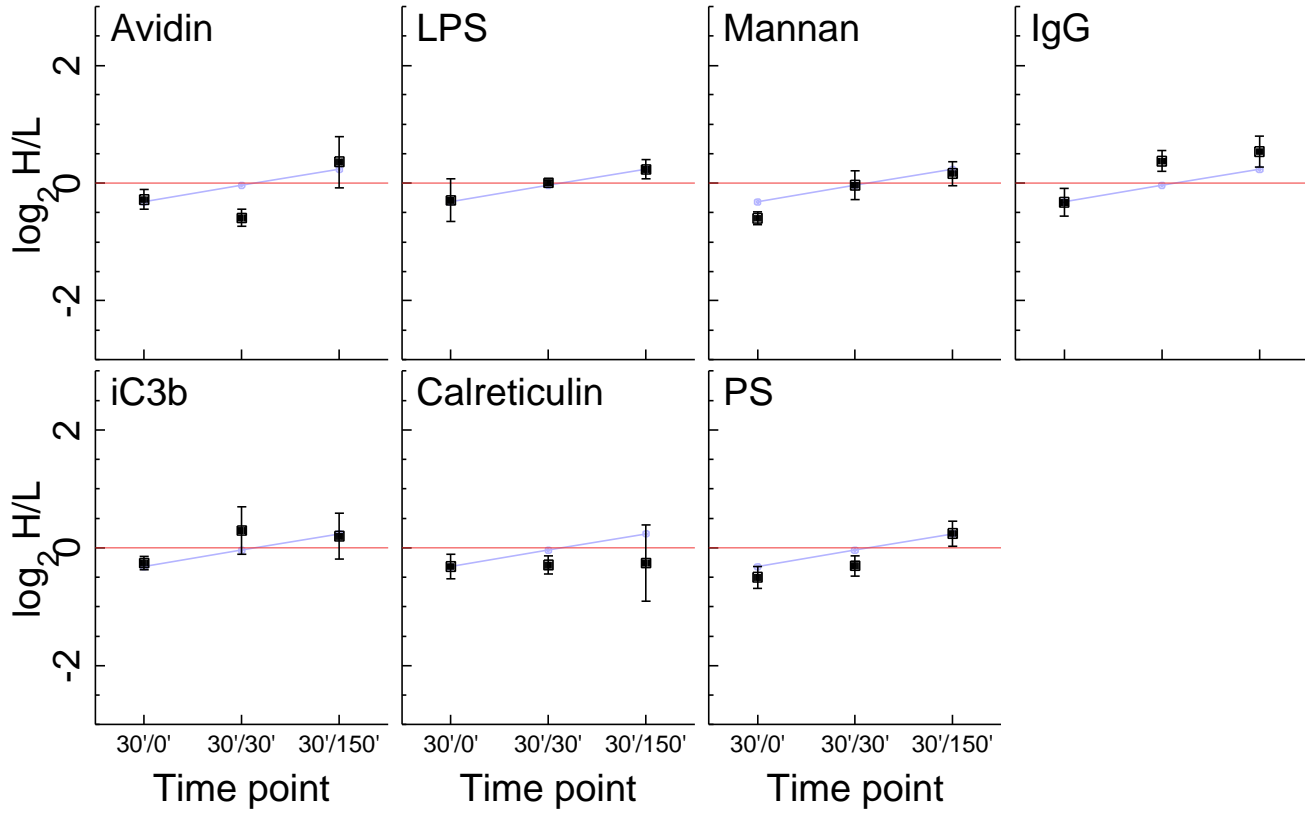

gmip (Q6PGG2)

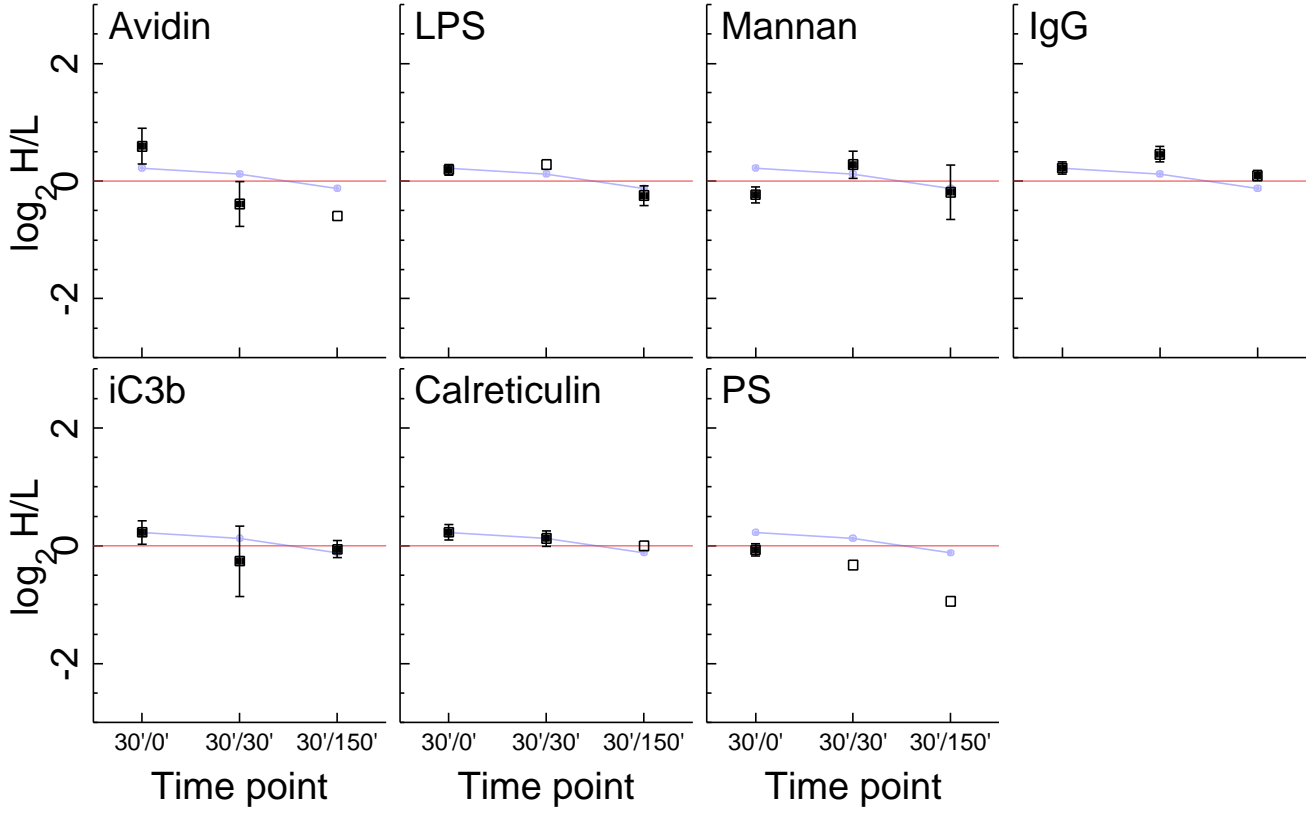

### gmpr2 (Q99L27)

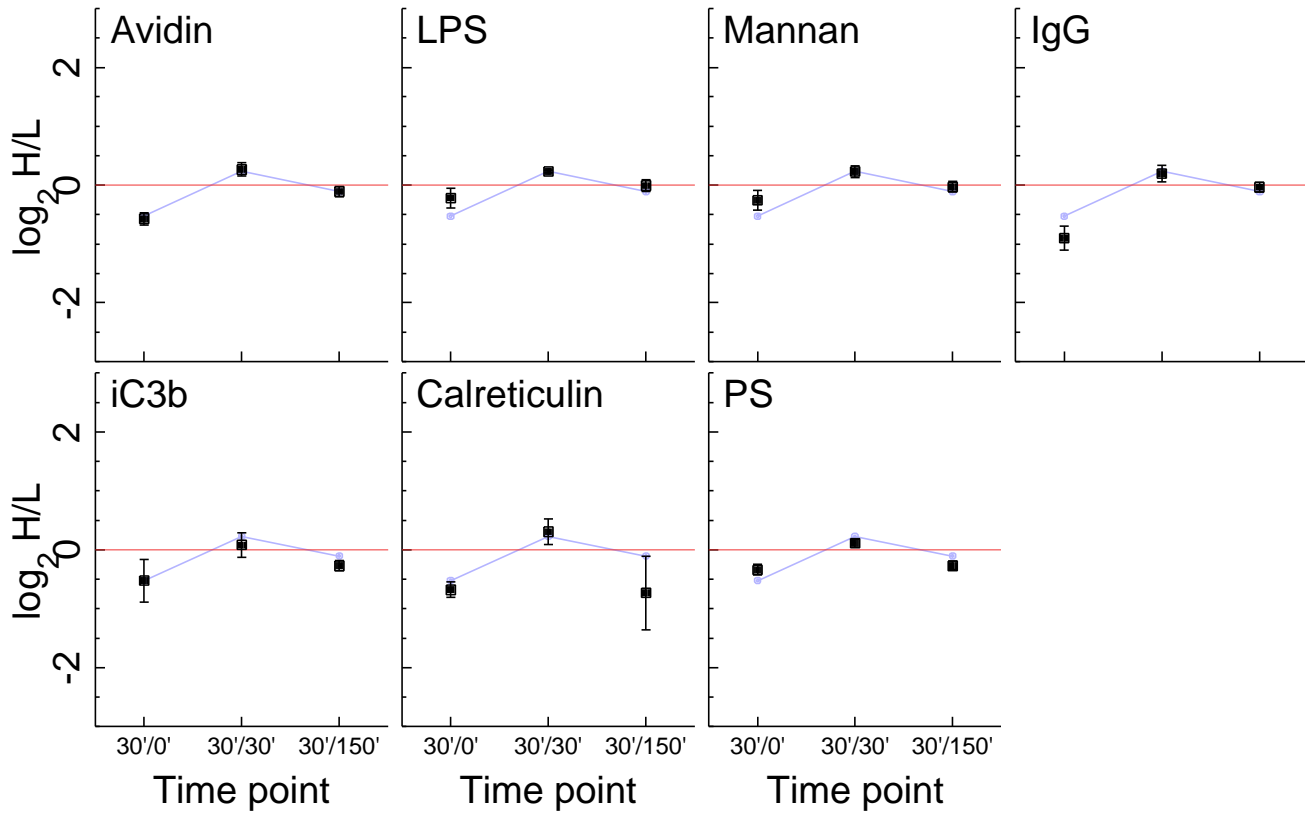

# gna13 (P27601)

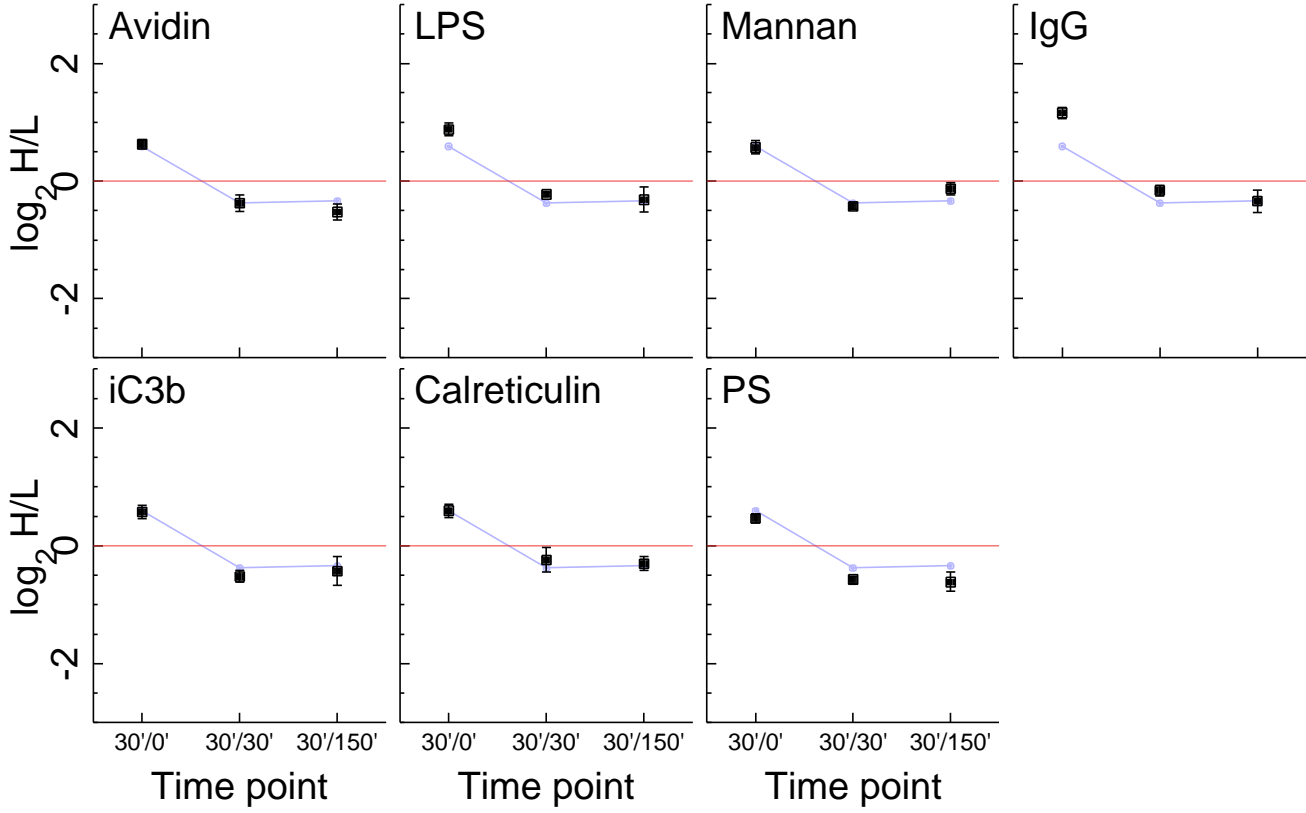

gnai2 (P08752)

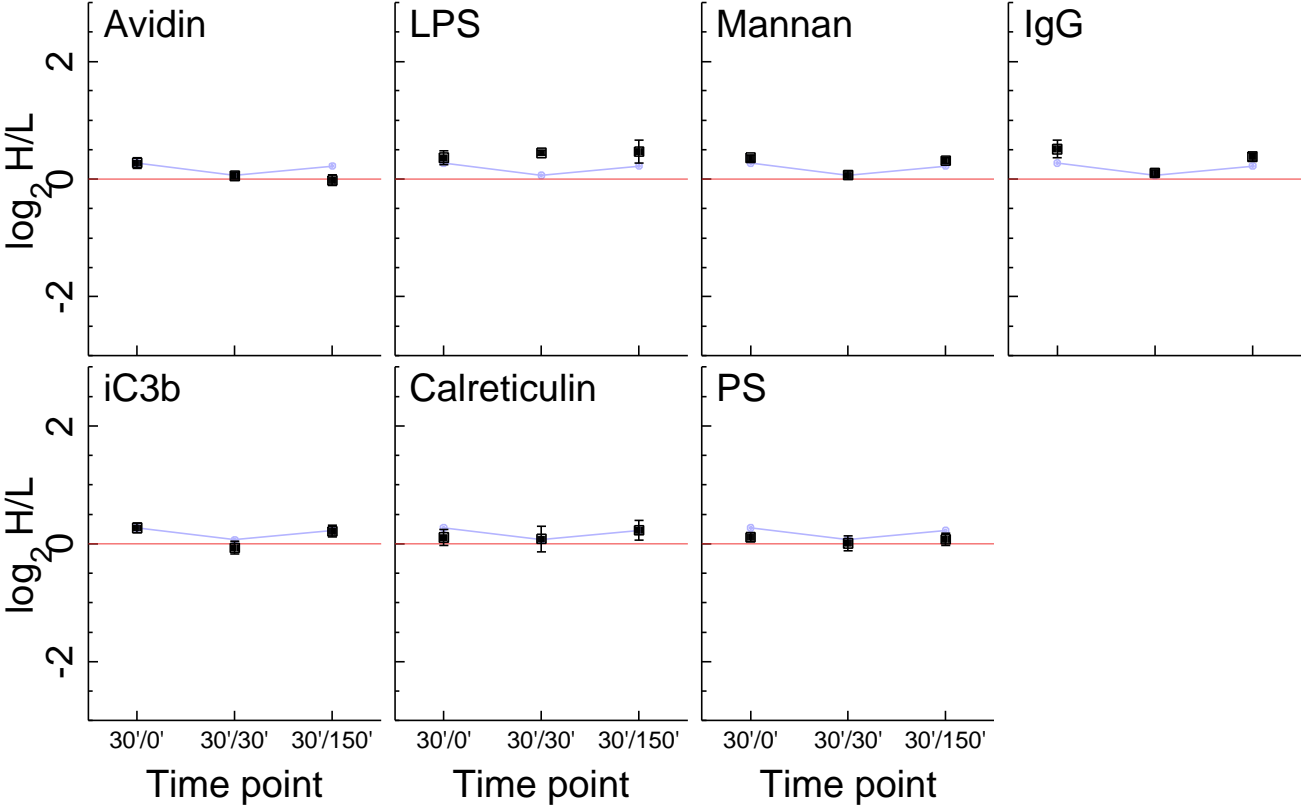



### gnai3 (Q9DC51)

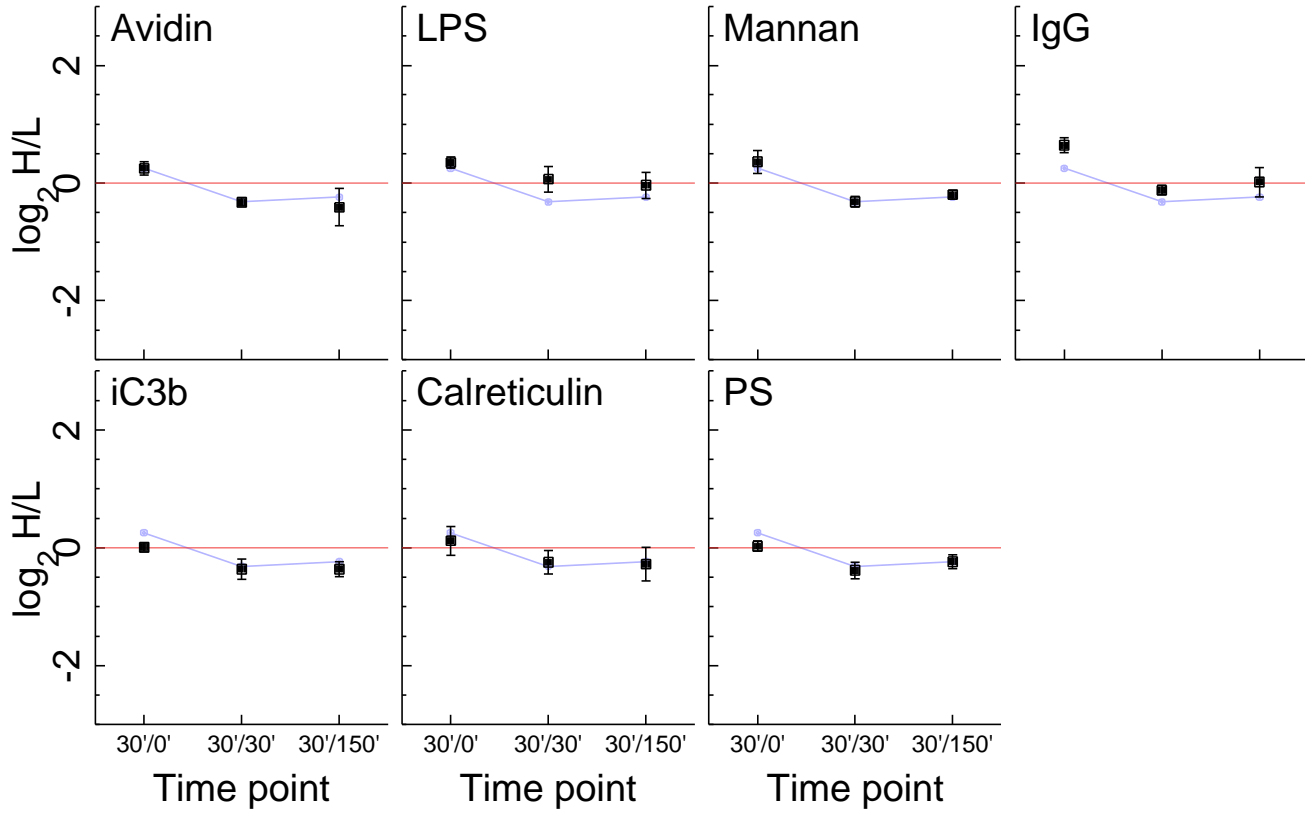

### gnaq (P21279)

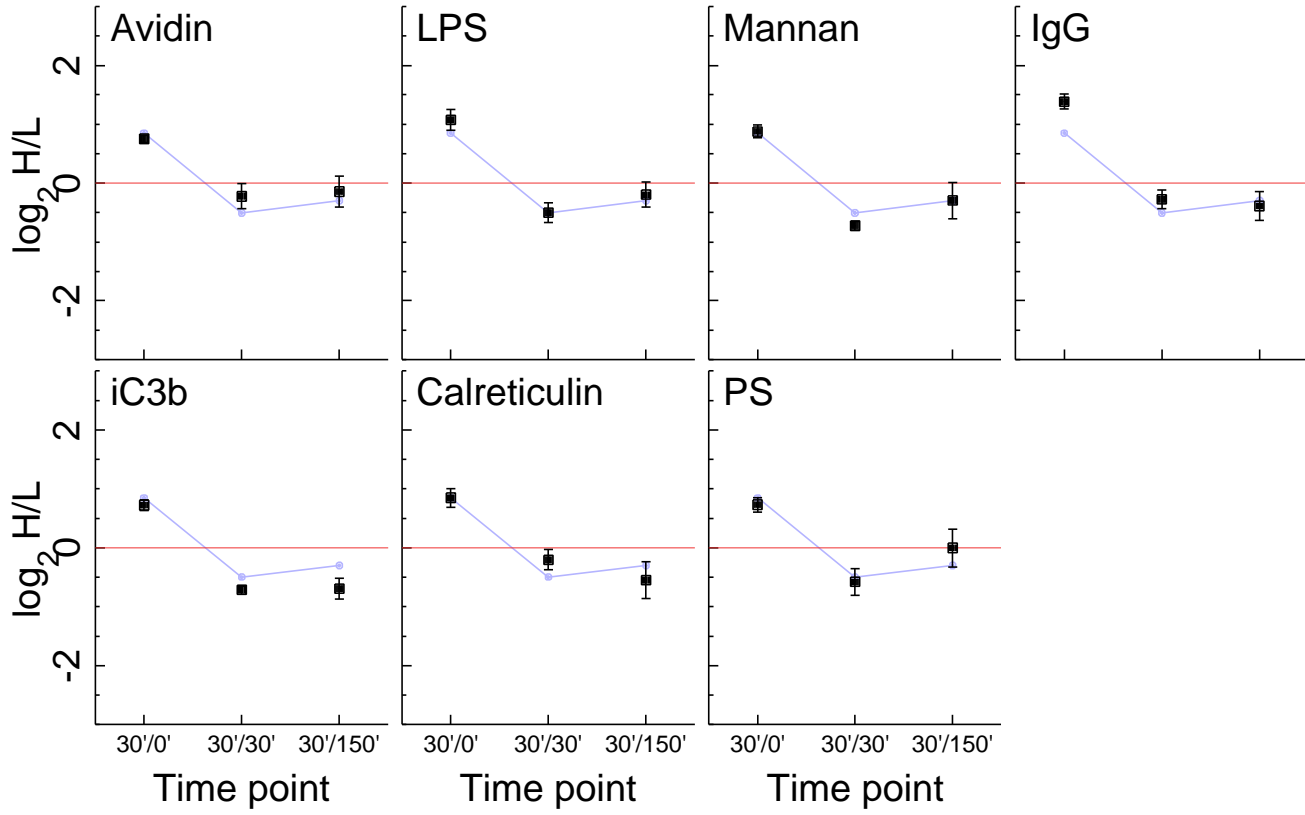

### gnas (P63094)

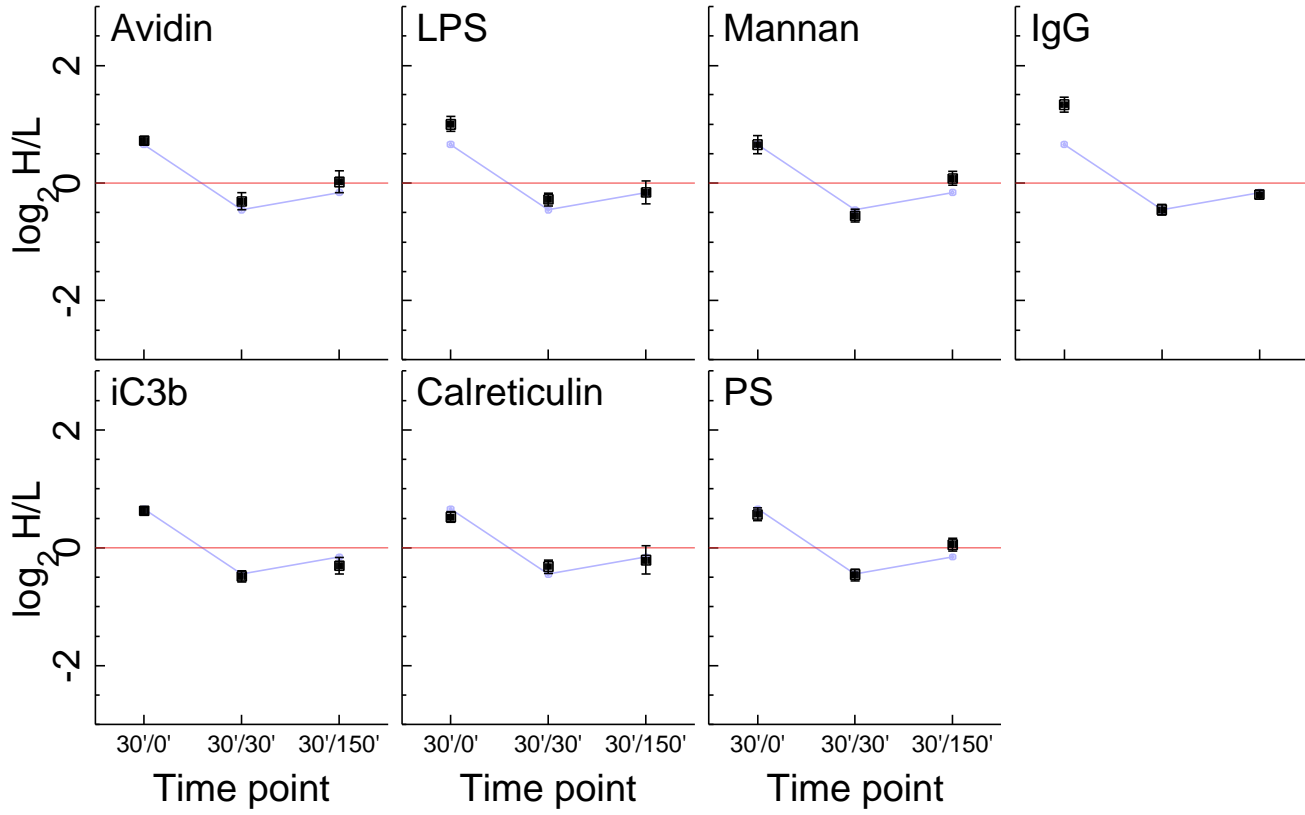

### gnb1 (P62874)

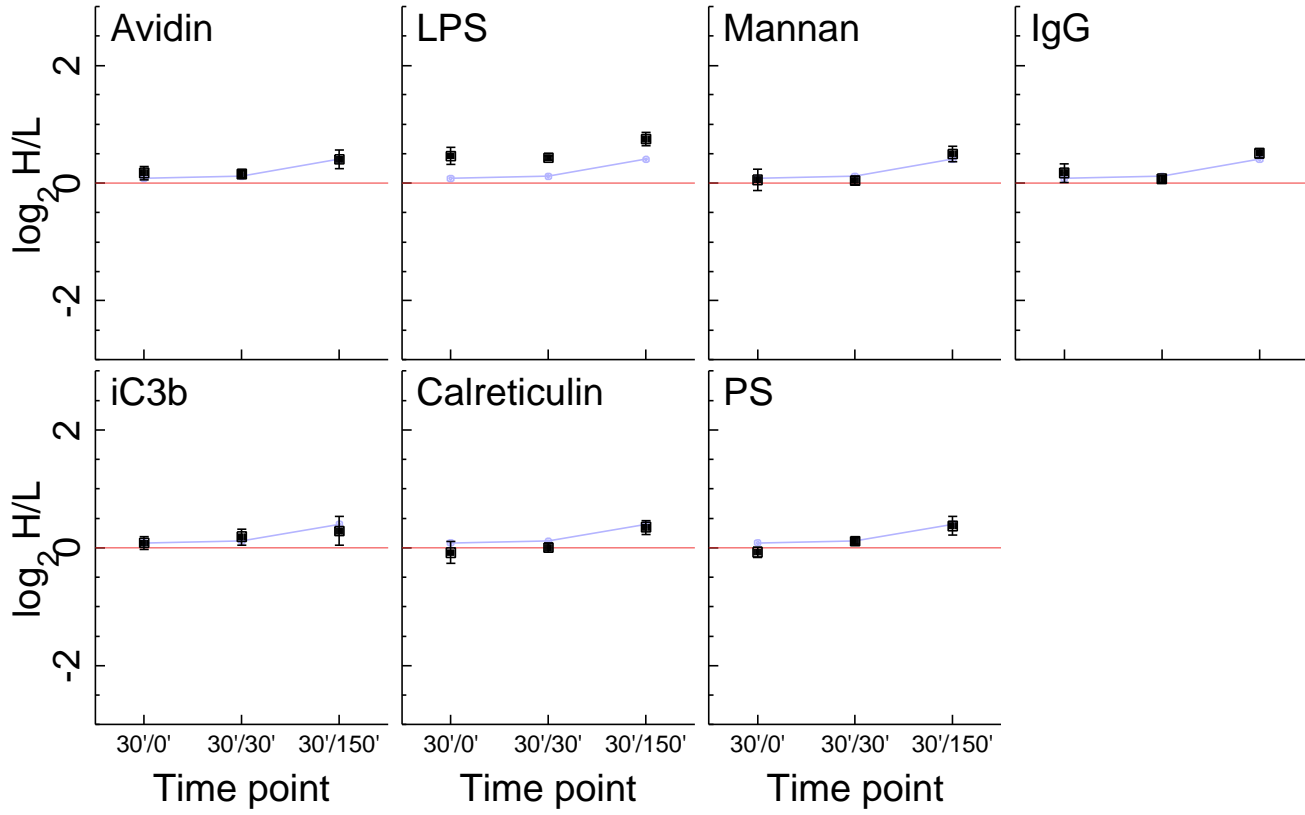

### gnb2 (E9QKR0)

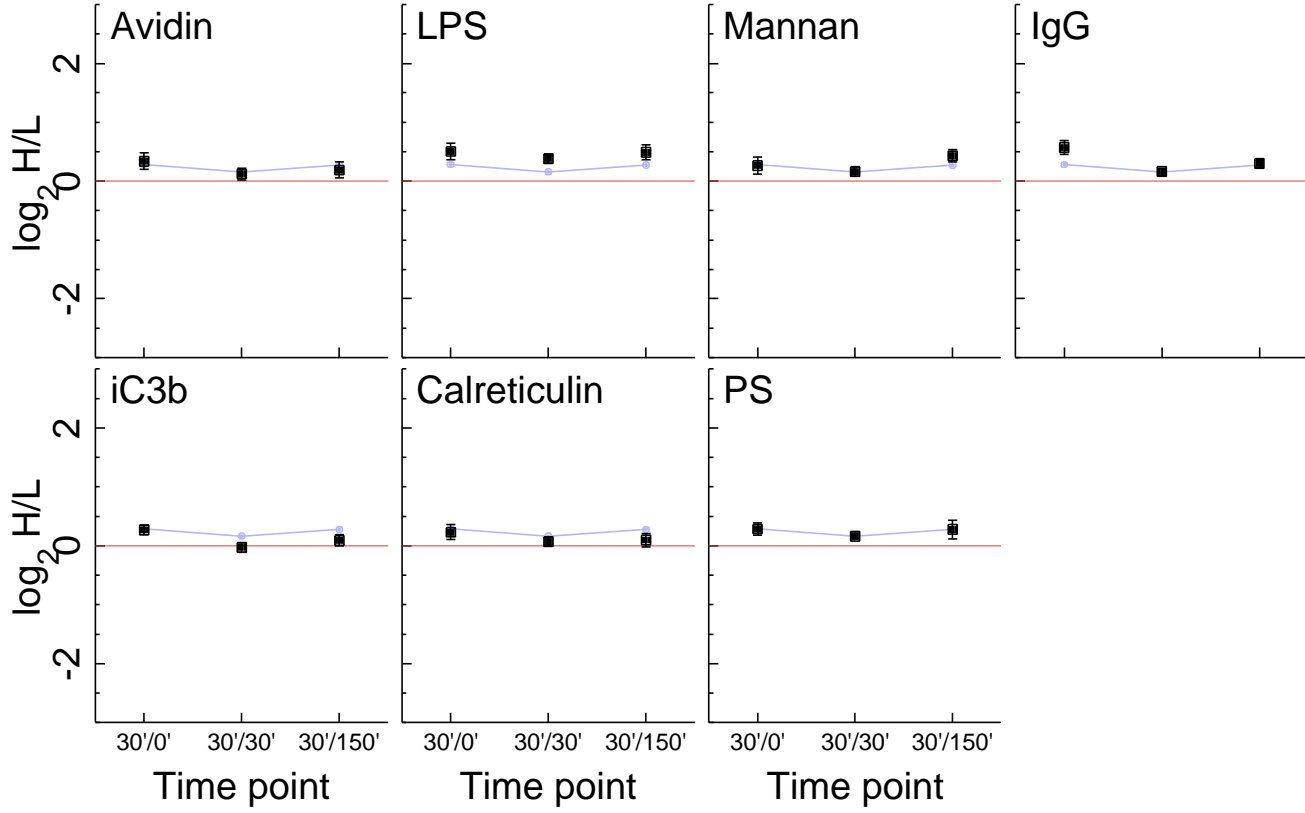

gnb211 (P68040)

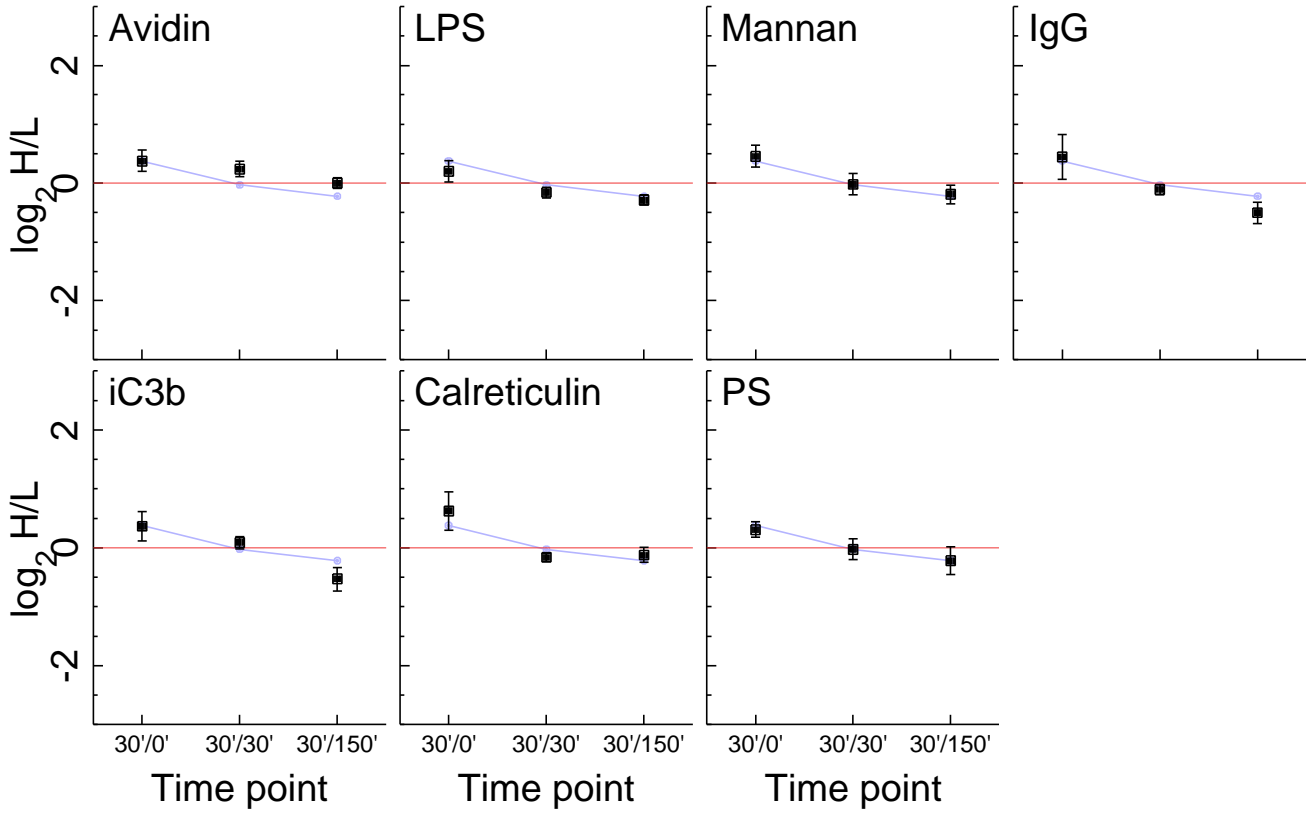

gnb4 (P29387)

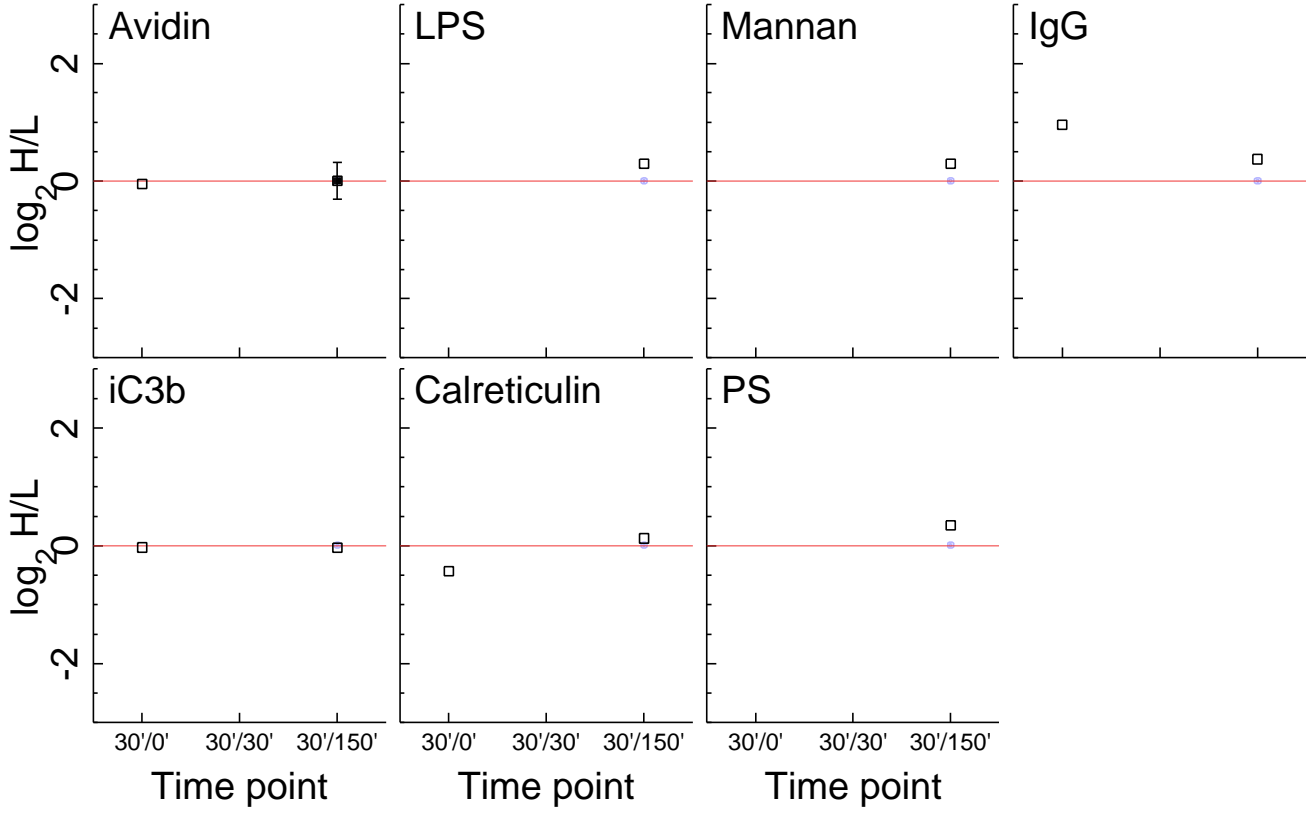

gng12 (Q9DAS9)

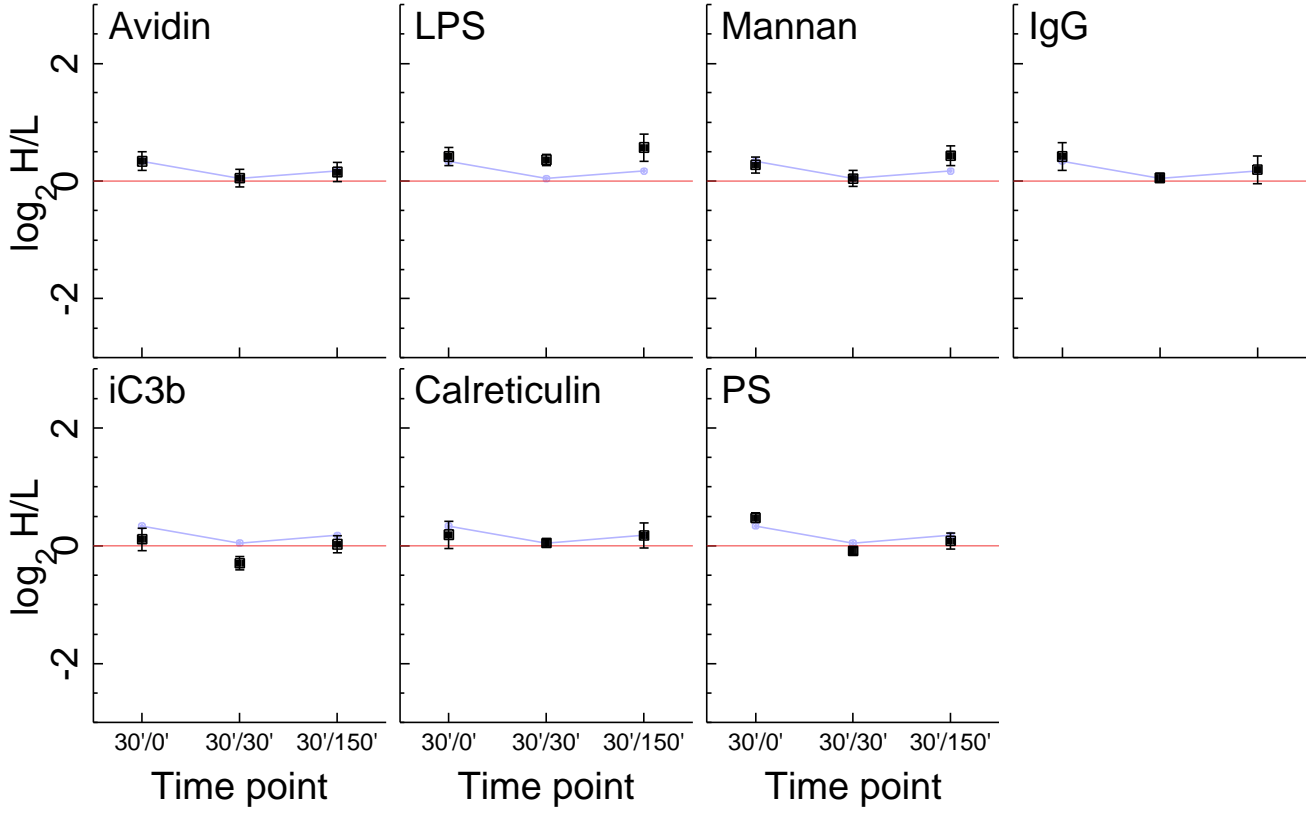



### gng2 (P63213)

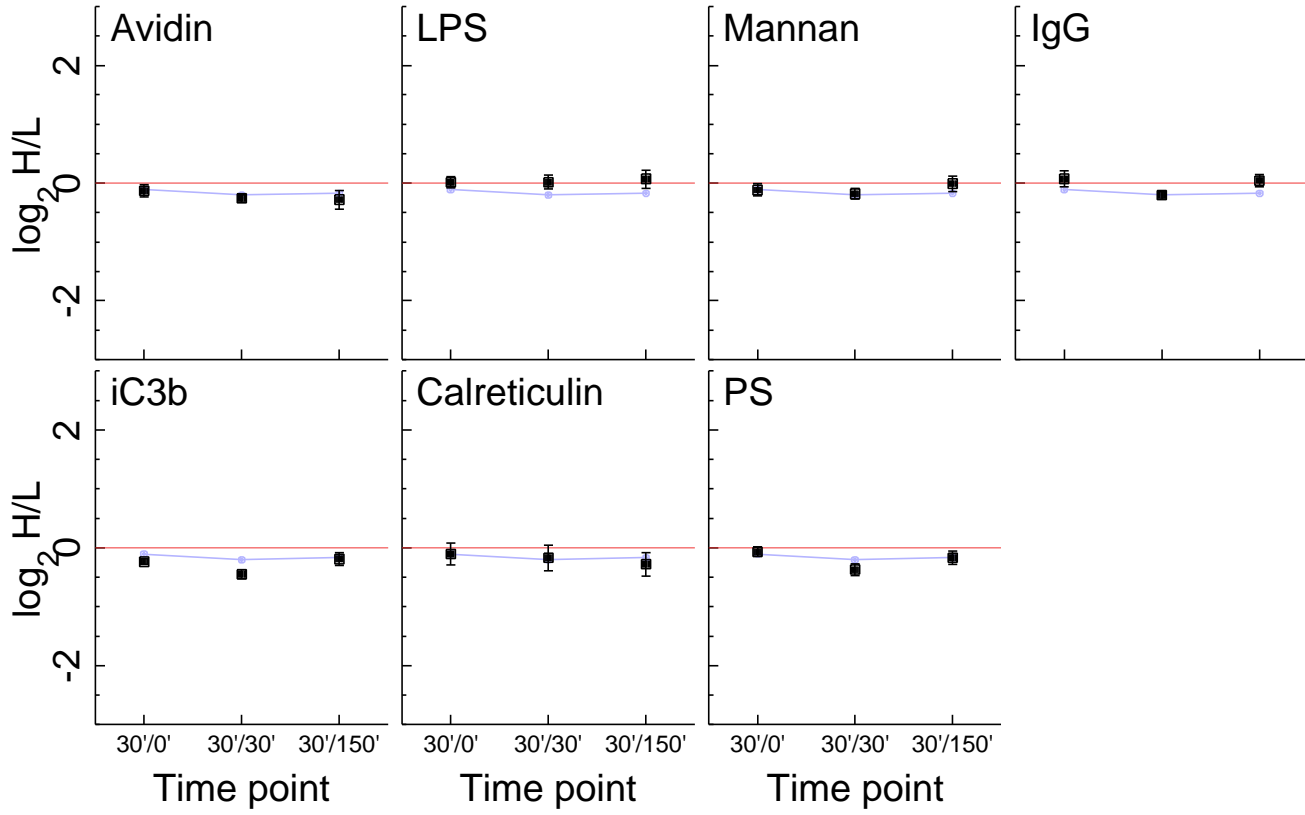

### gng5 (Q80SZ7)

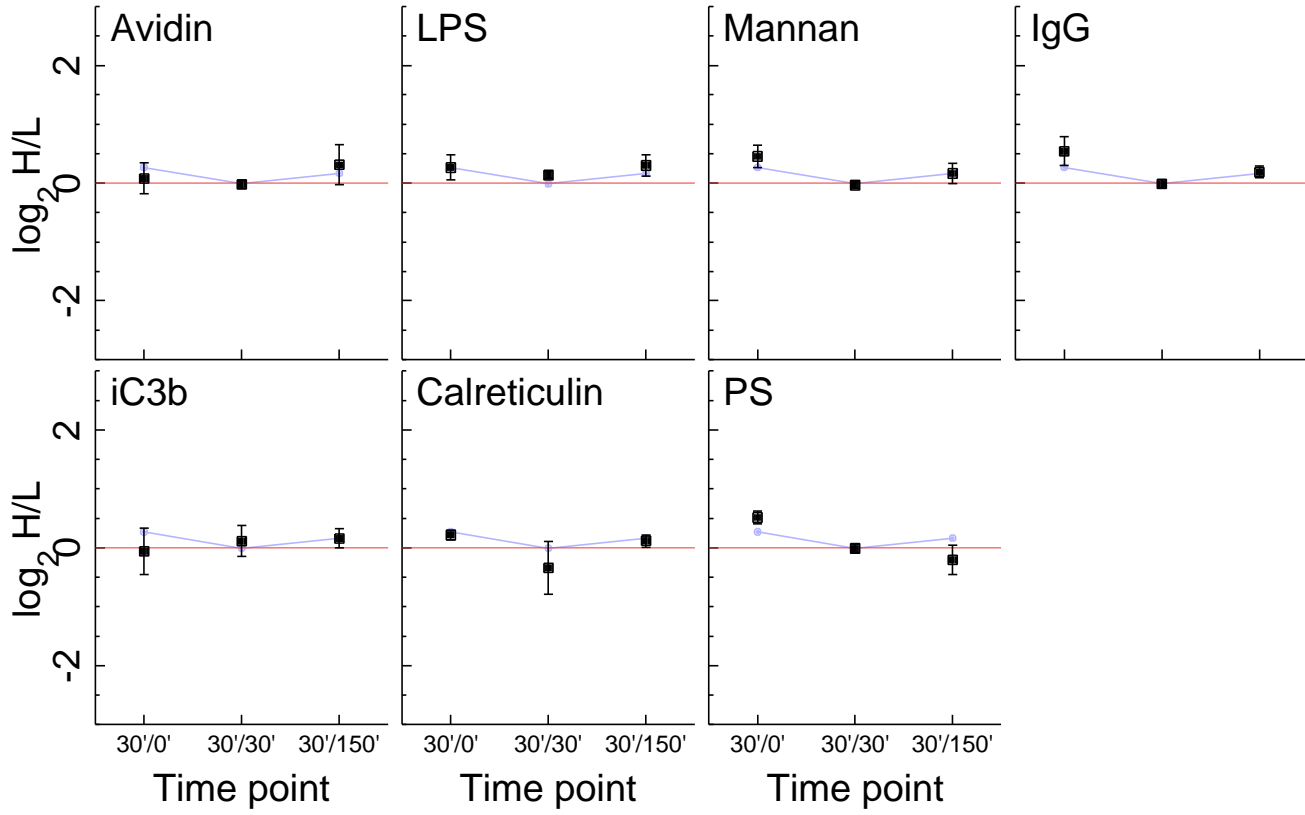

### gns (Q8BFR4)

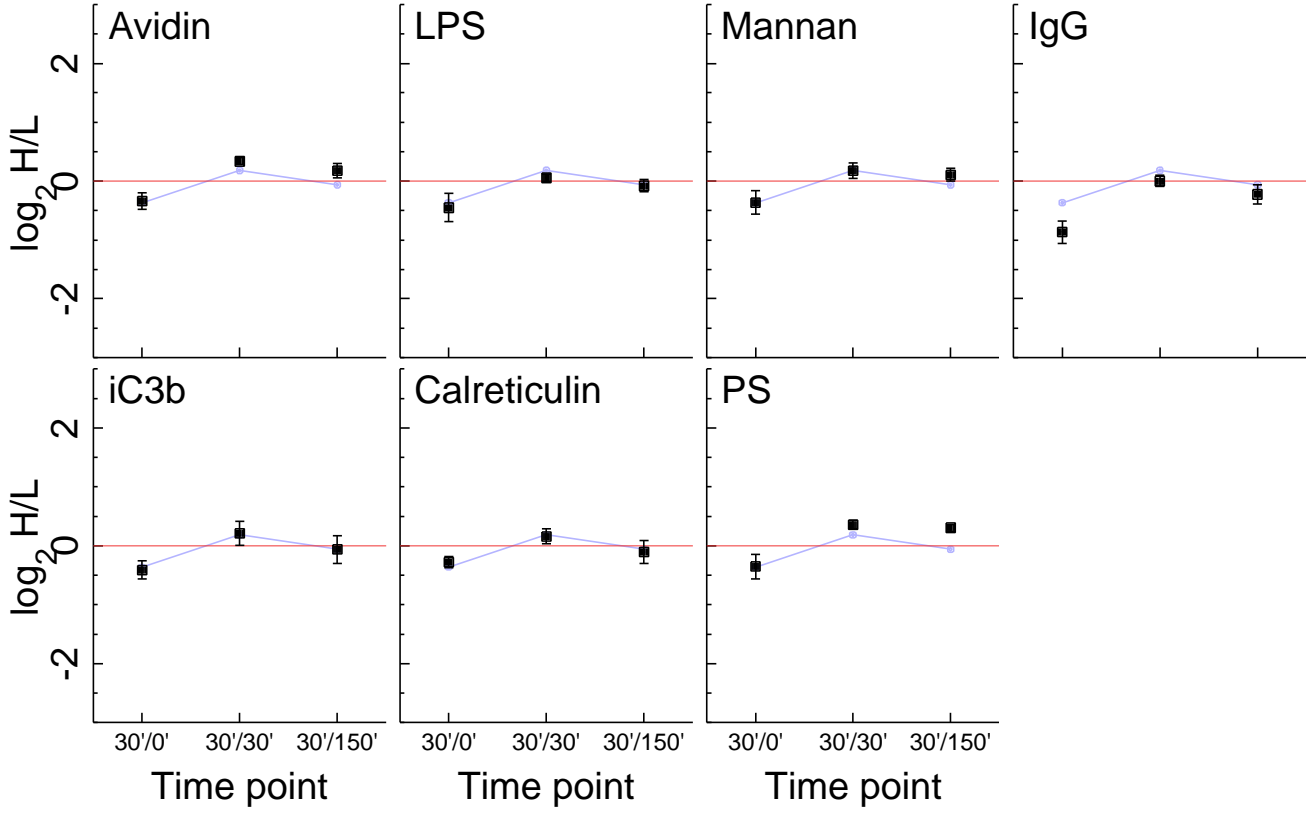

# golga1 (Q9CW79)

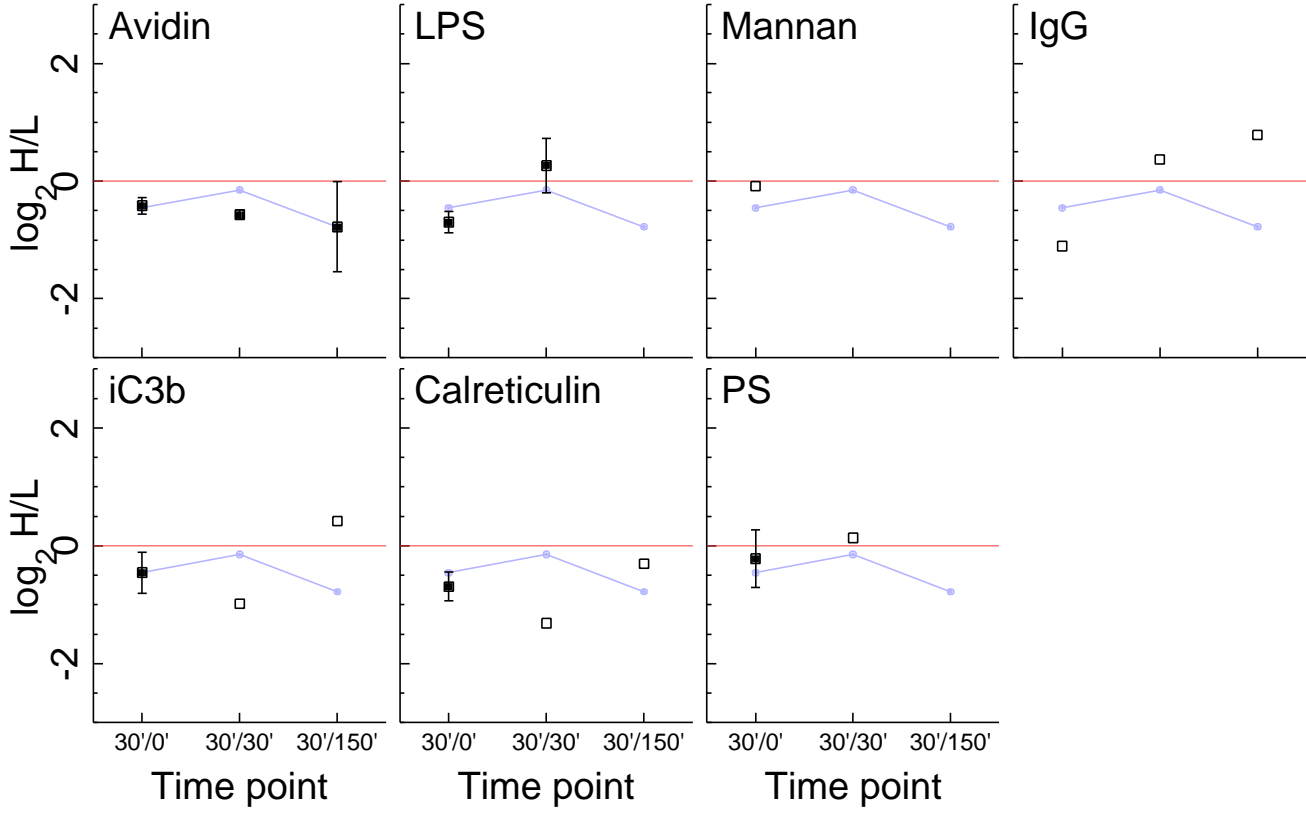

# golga4 (Q91VW5)

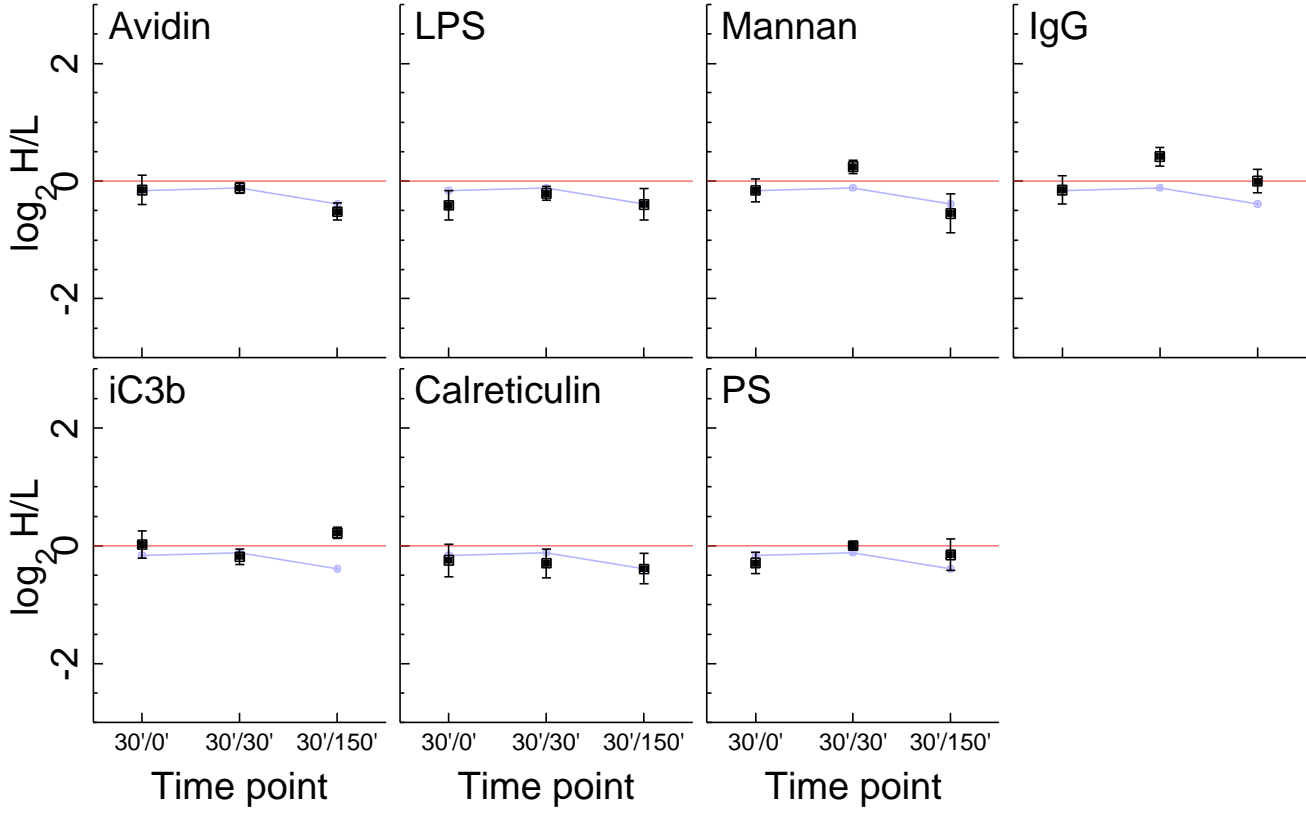

### golga5 (Q9QYE6)

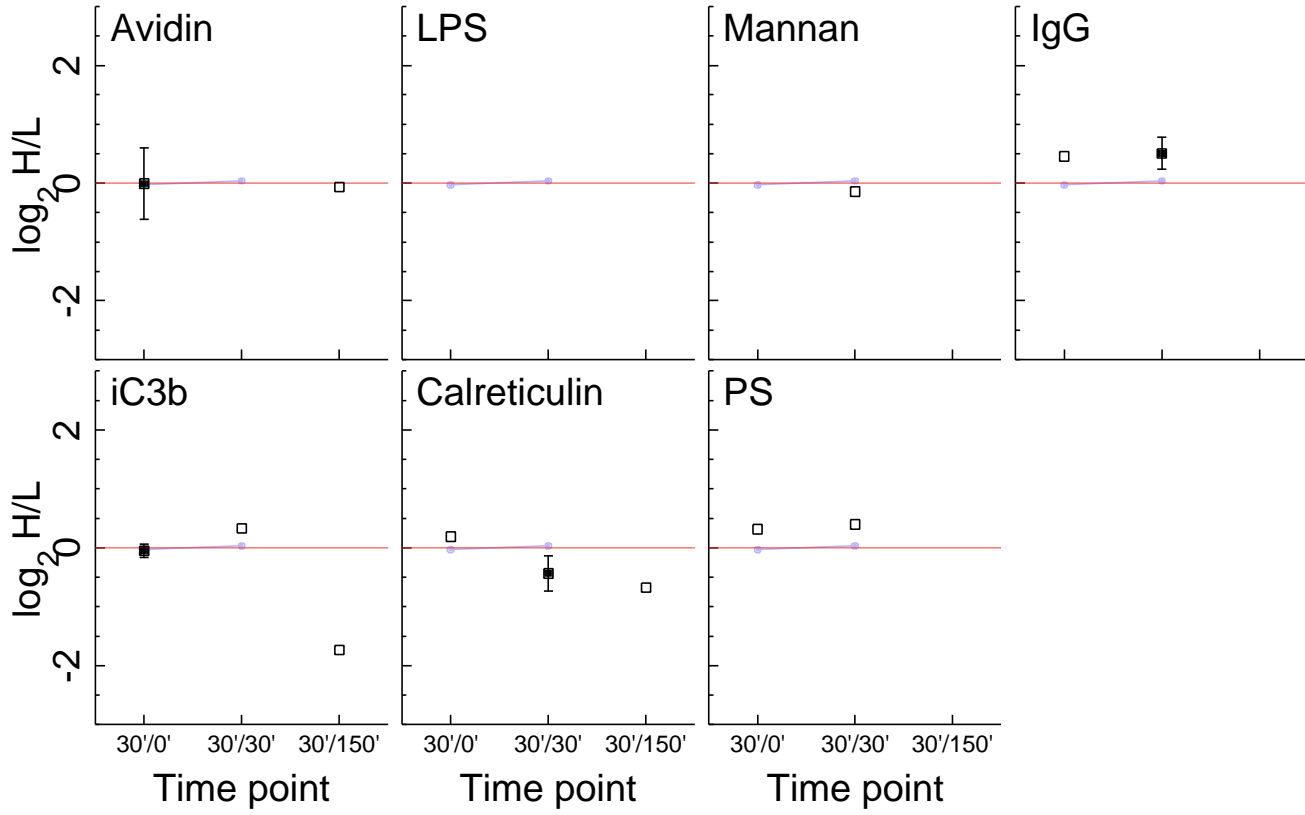

### golga7 (Q91W53)

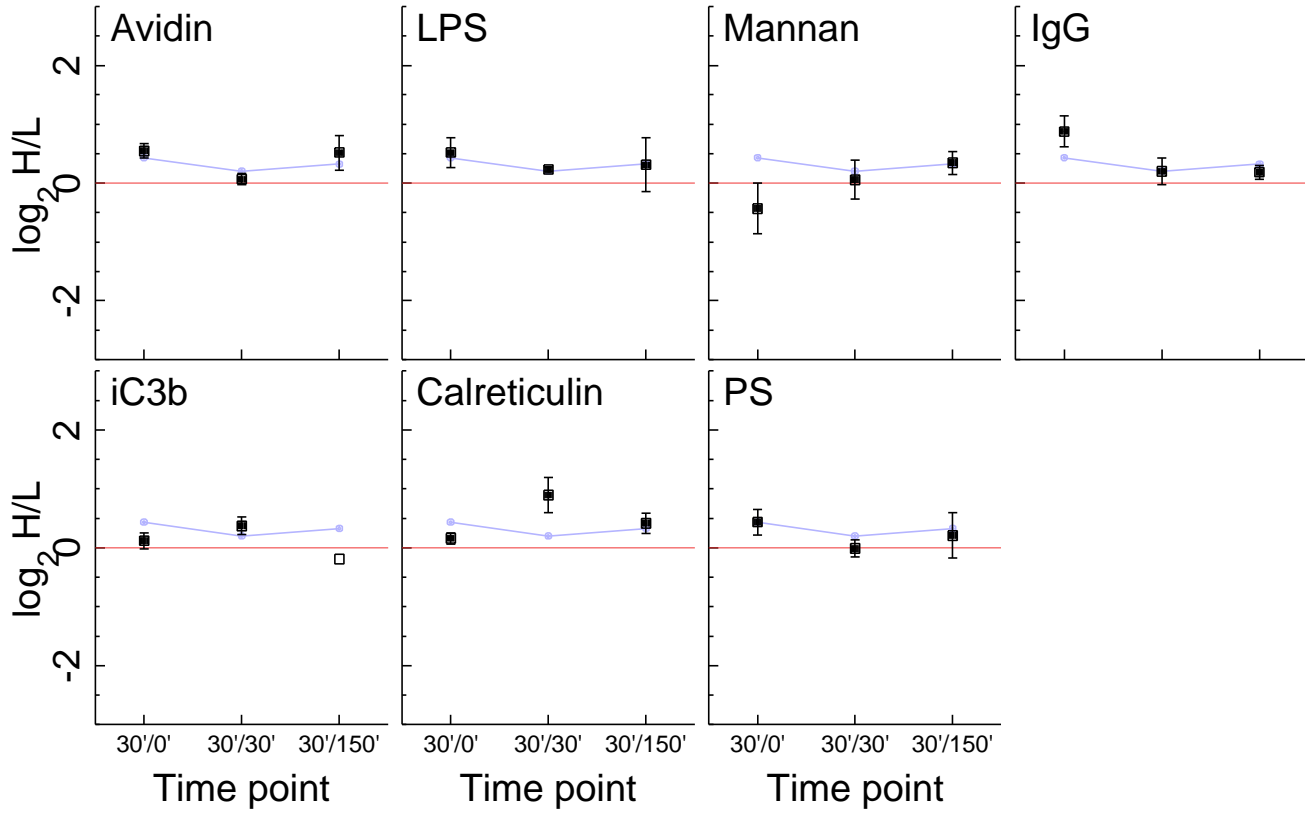

golgb1 (E9PVZ8)

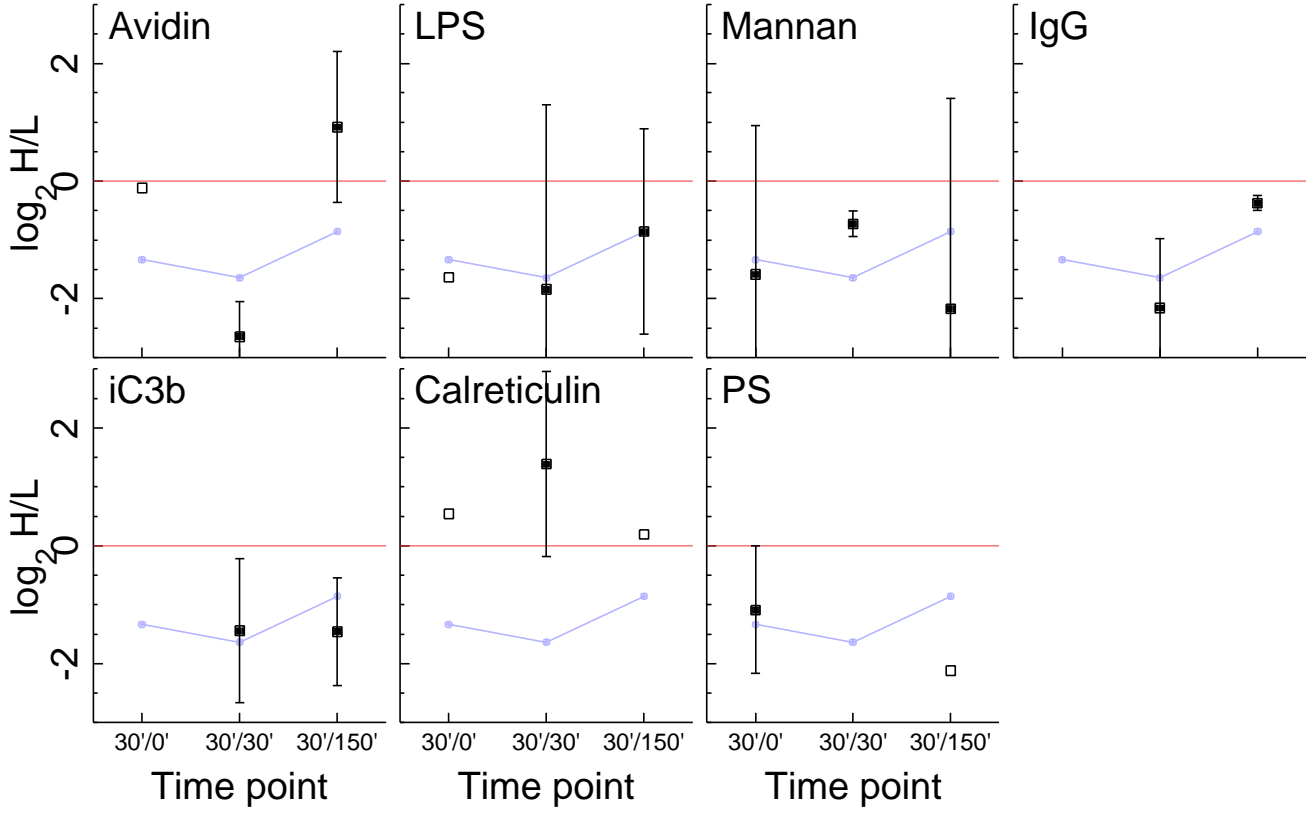



gosr1 (O88630)

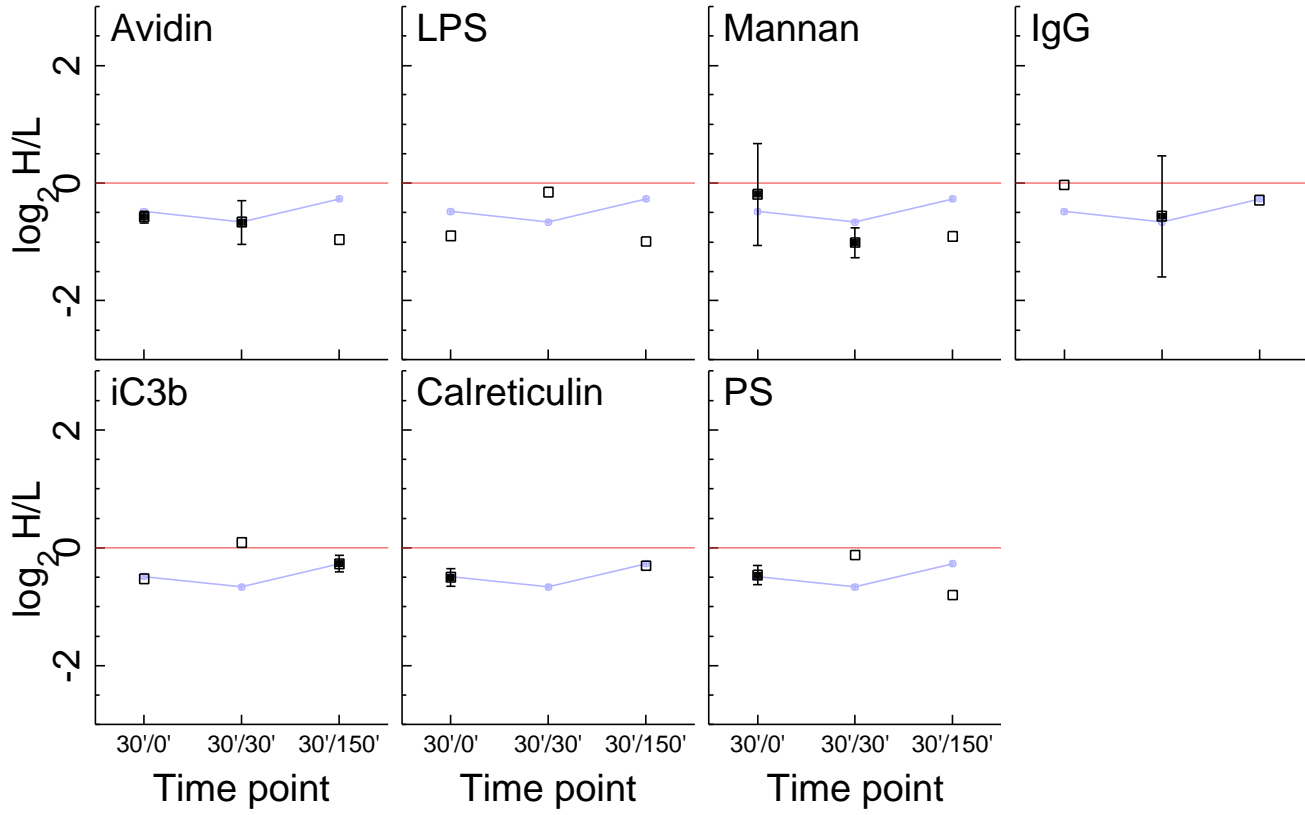

got2 (P05202)

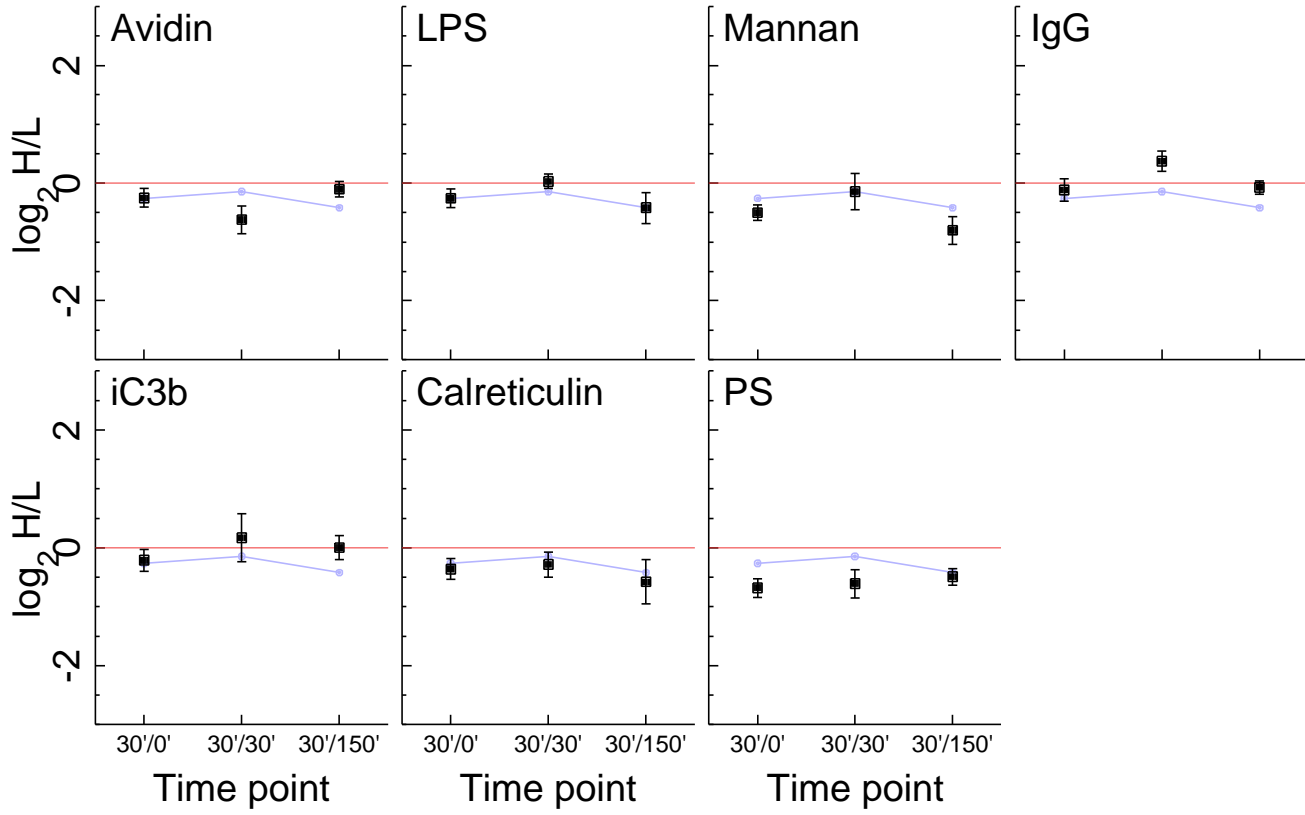

### gp49a (Q61450)

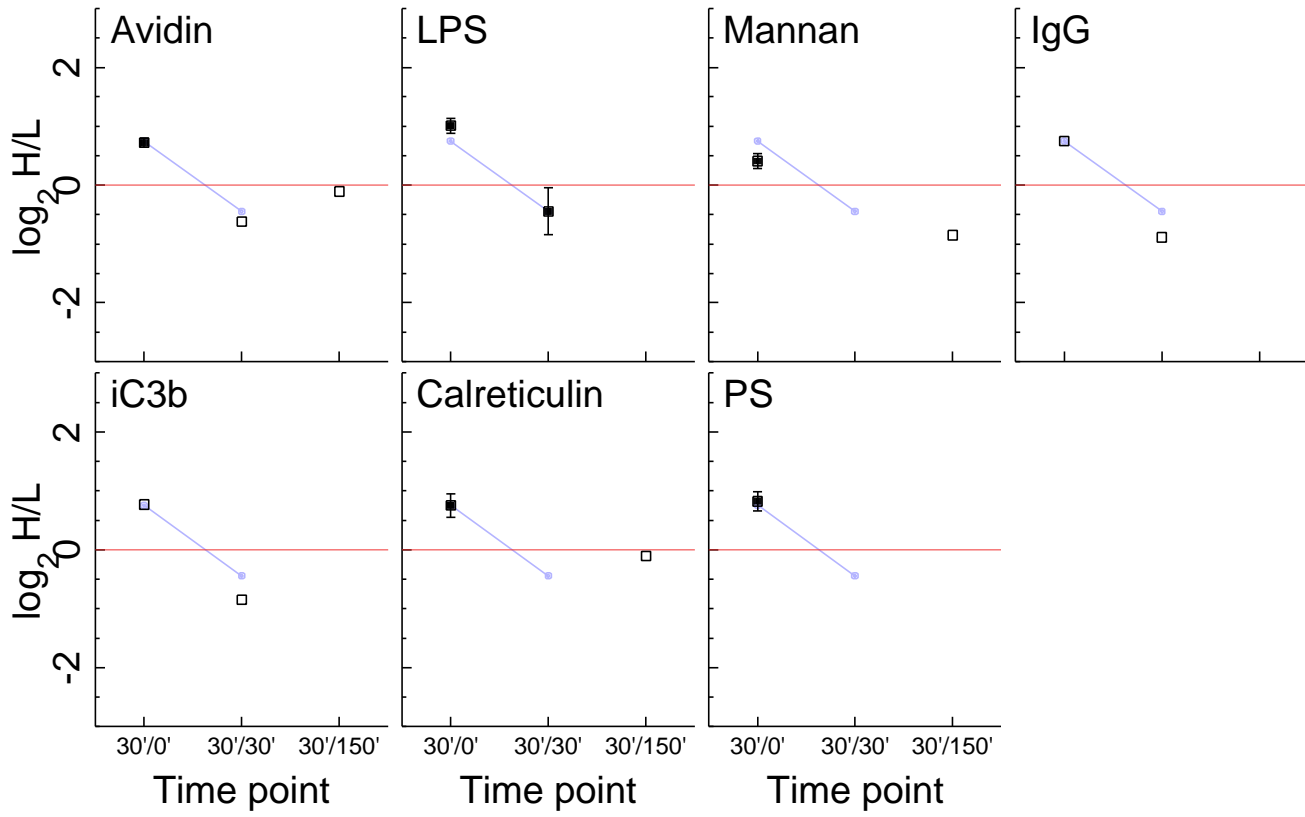

### gpatch8 (A2A6A1)

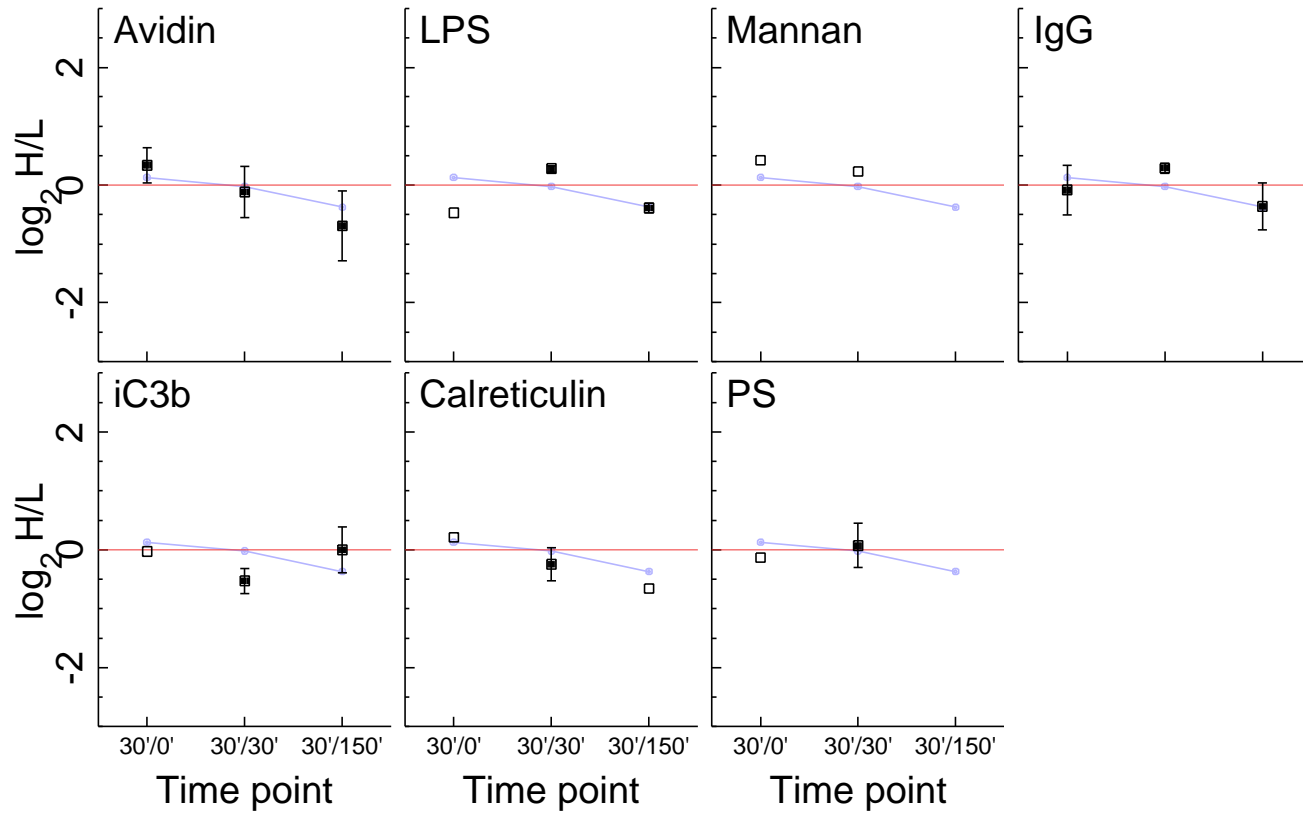

### gpd2 (Q64521)

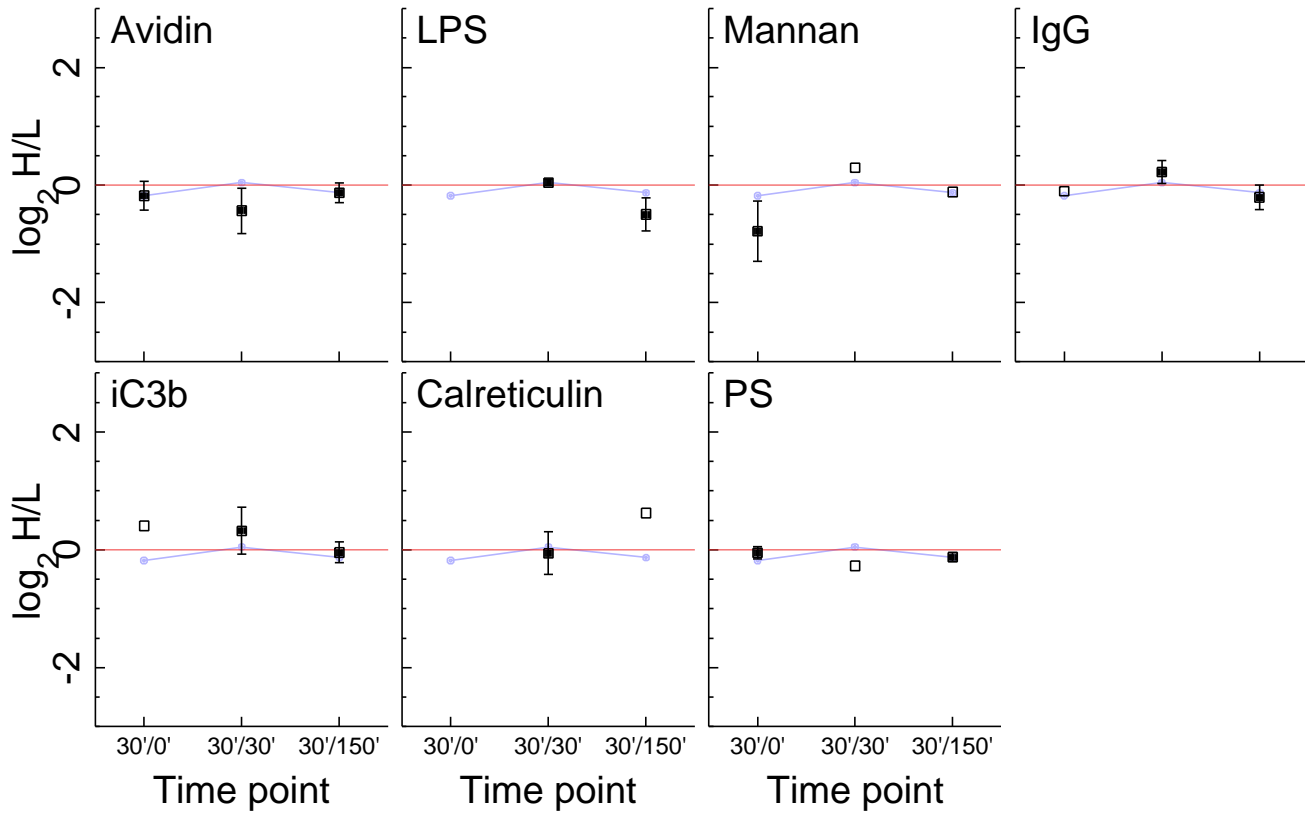

gpi (P06745)

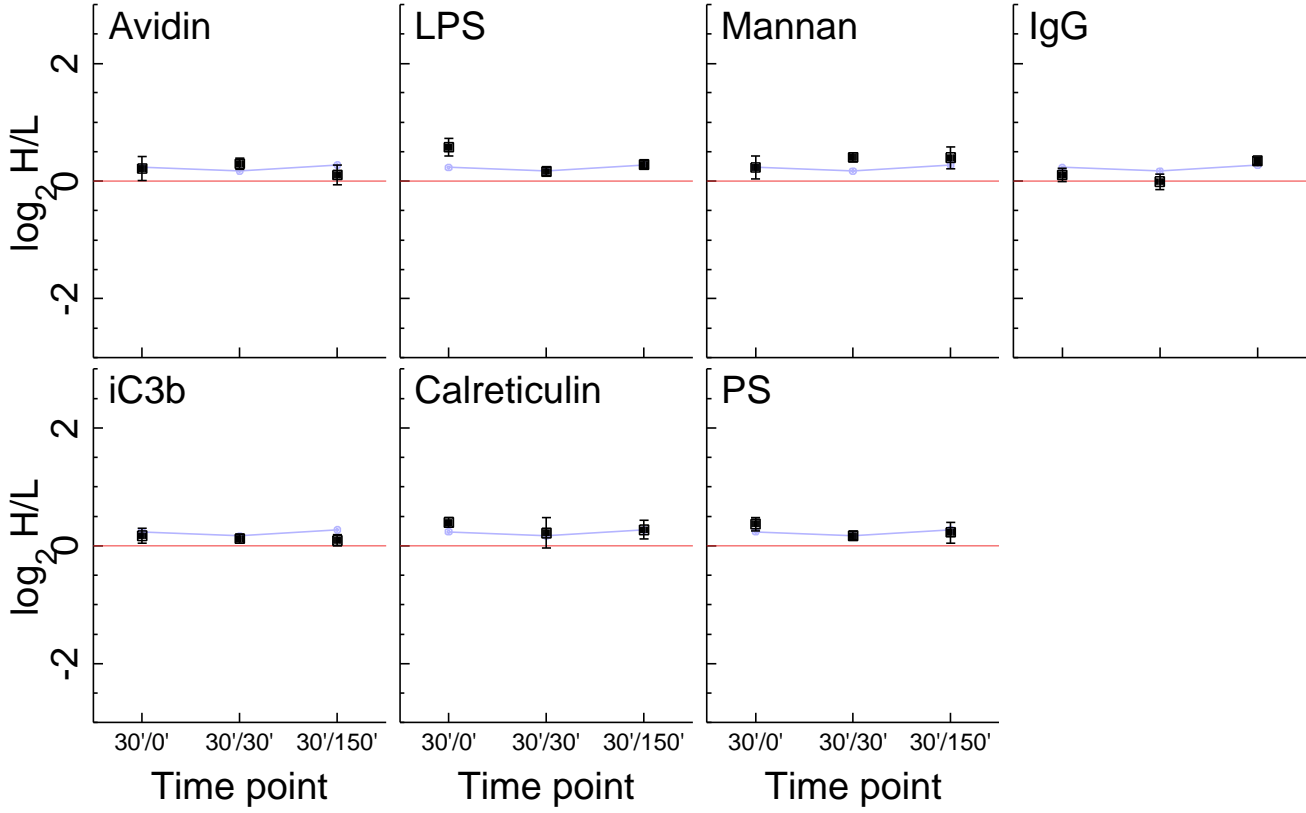

gpld1 (Q8VCU2)

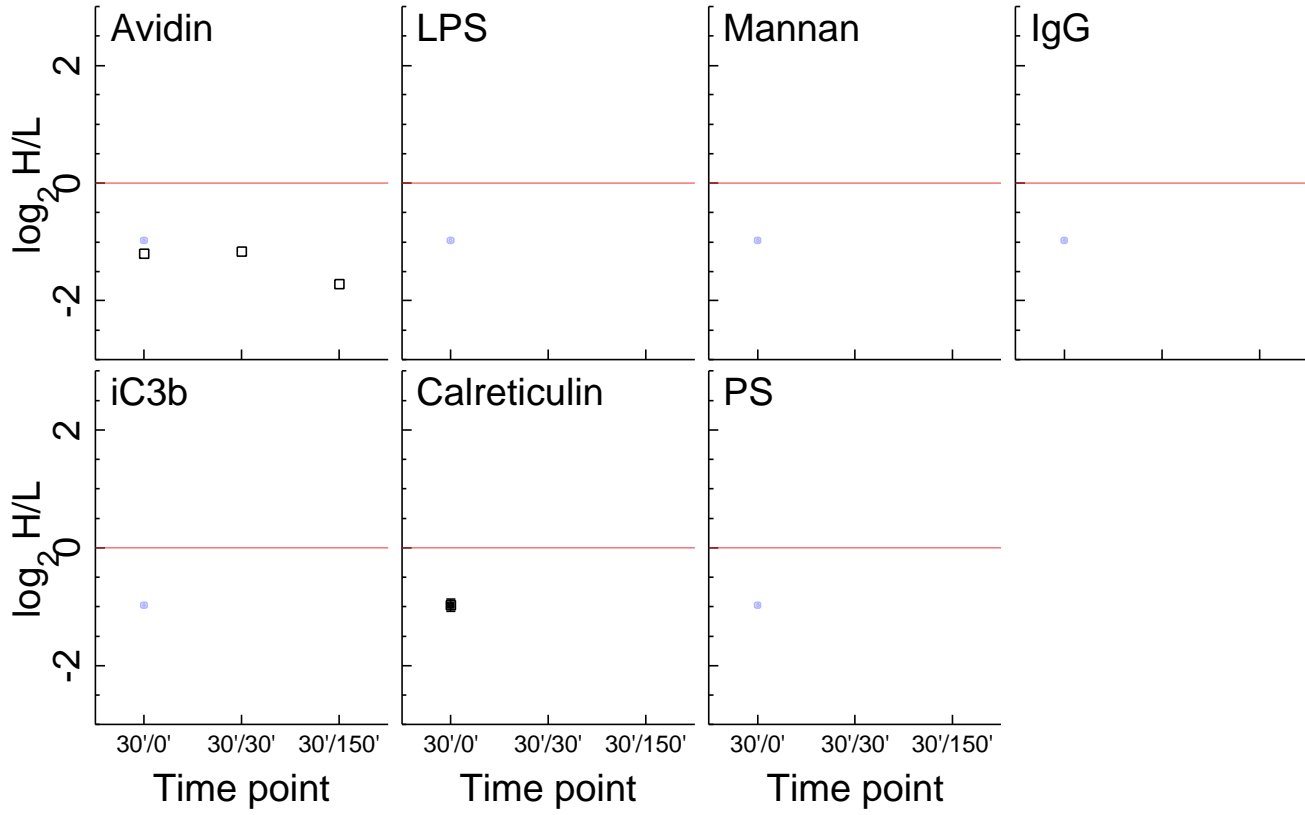

gpnmb (Q99P91)

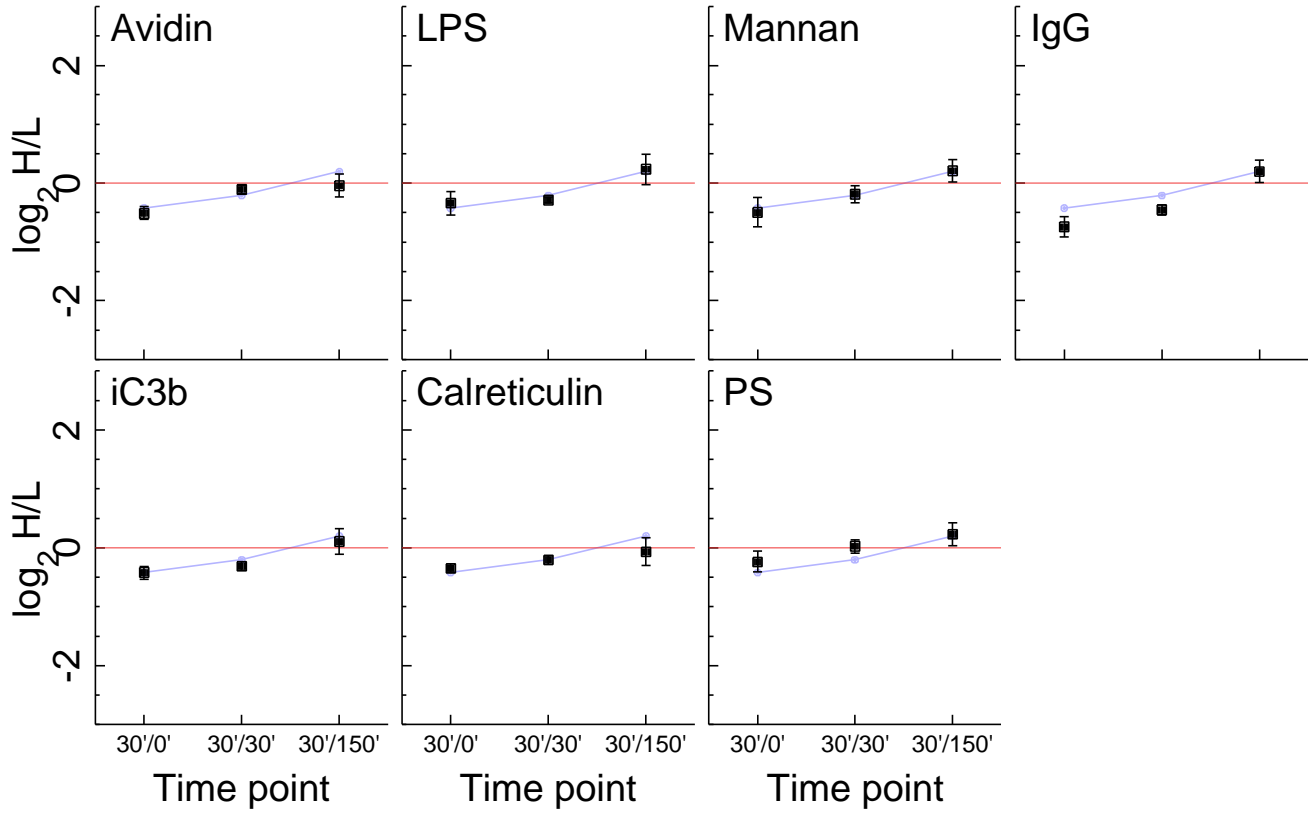



### gpr107 (Q8BUV8)

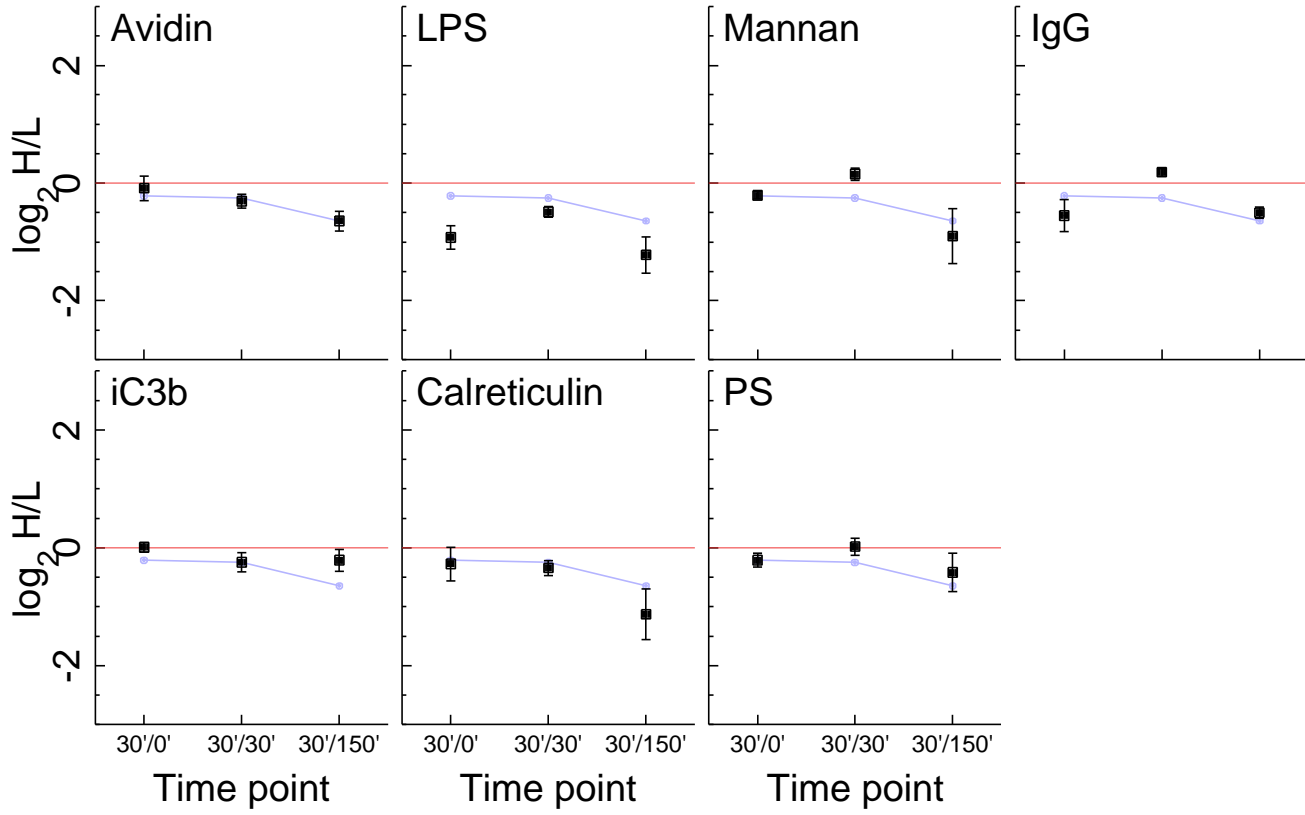

### gpr108 (Q91WD0)

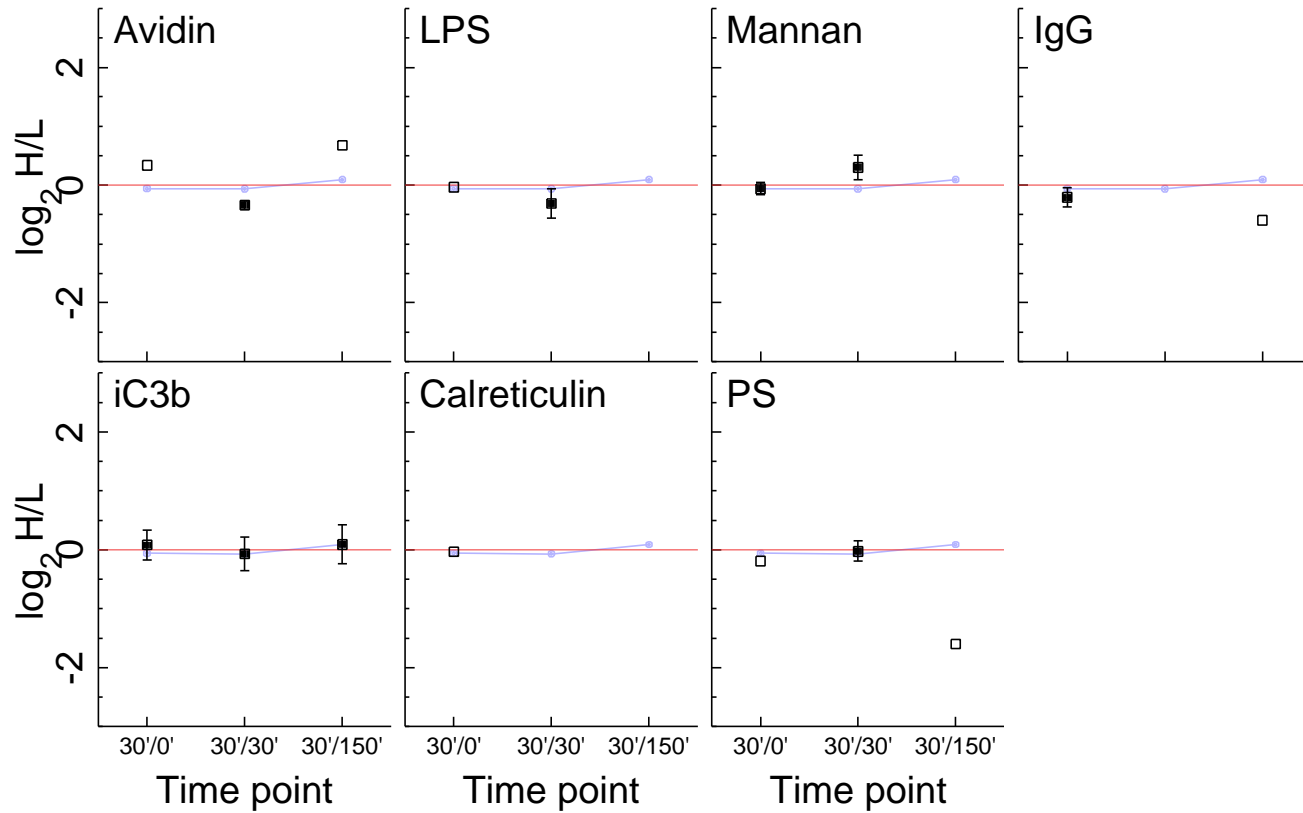

### gpr137b (Q8BNQ3)

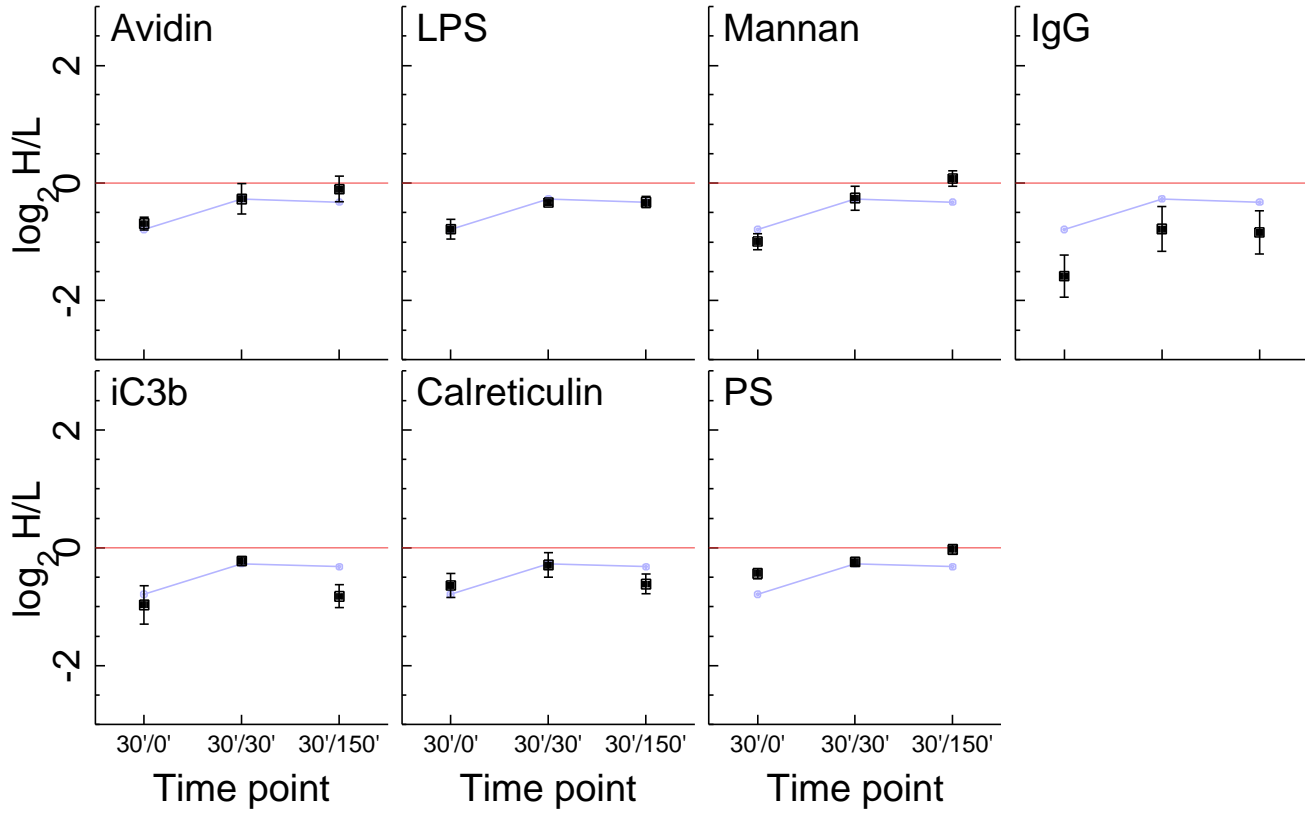

### gpsm3 (Q3U1Z5)

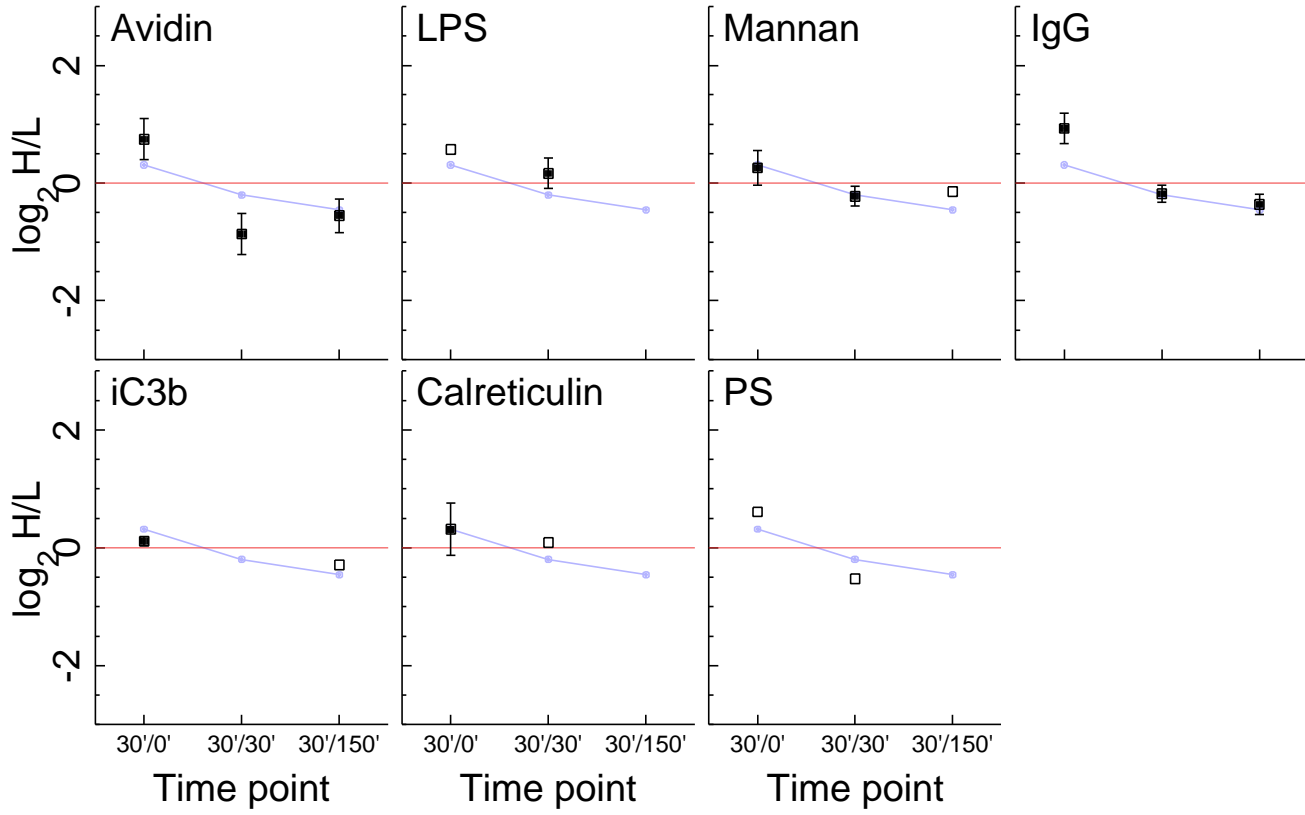

### gpx1 (P11352)

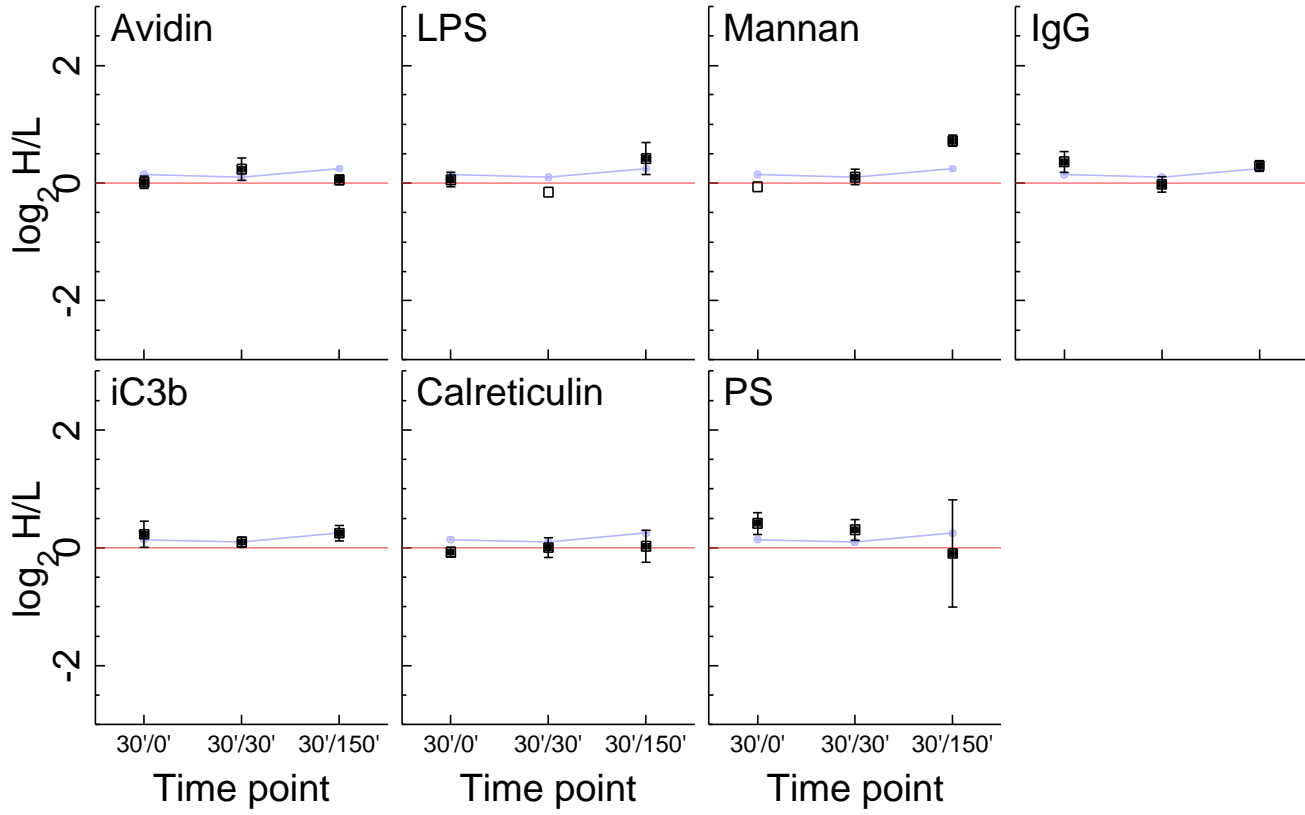

### gpx4 (Q76LV0)

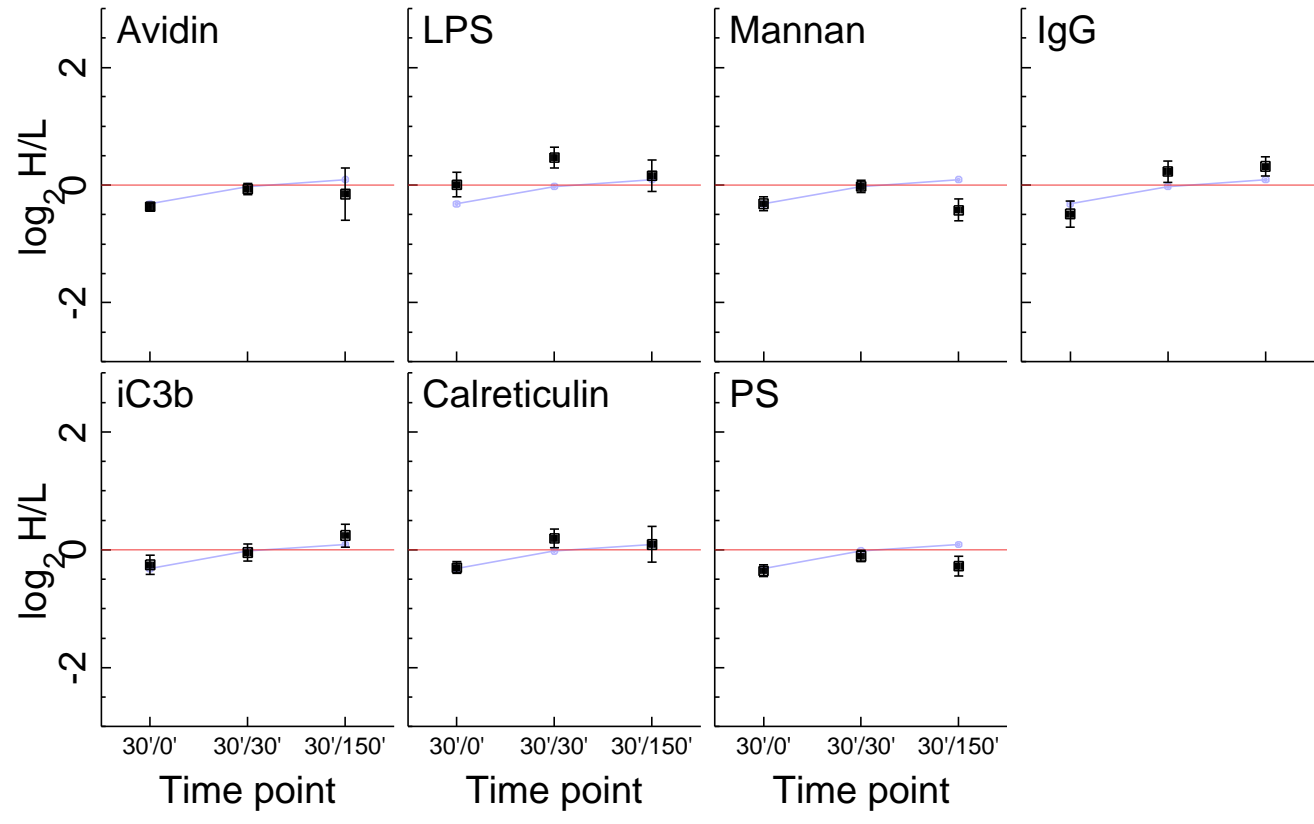

### grap2 (O89100)

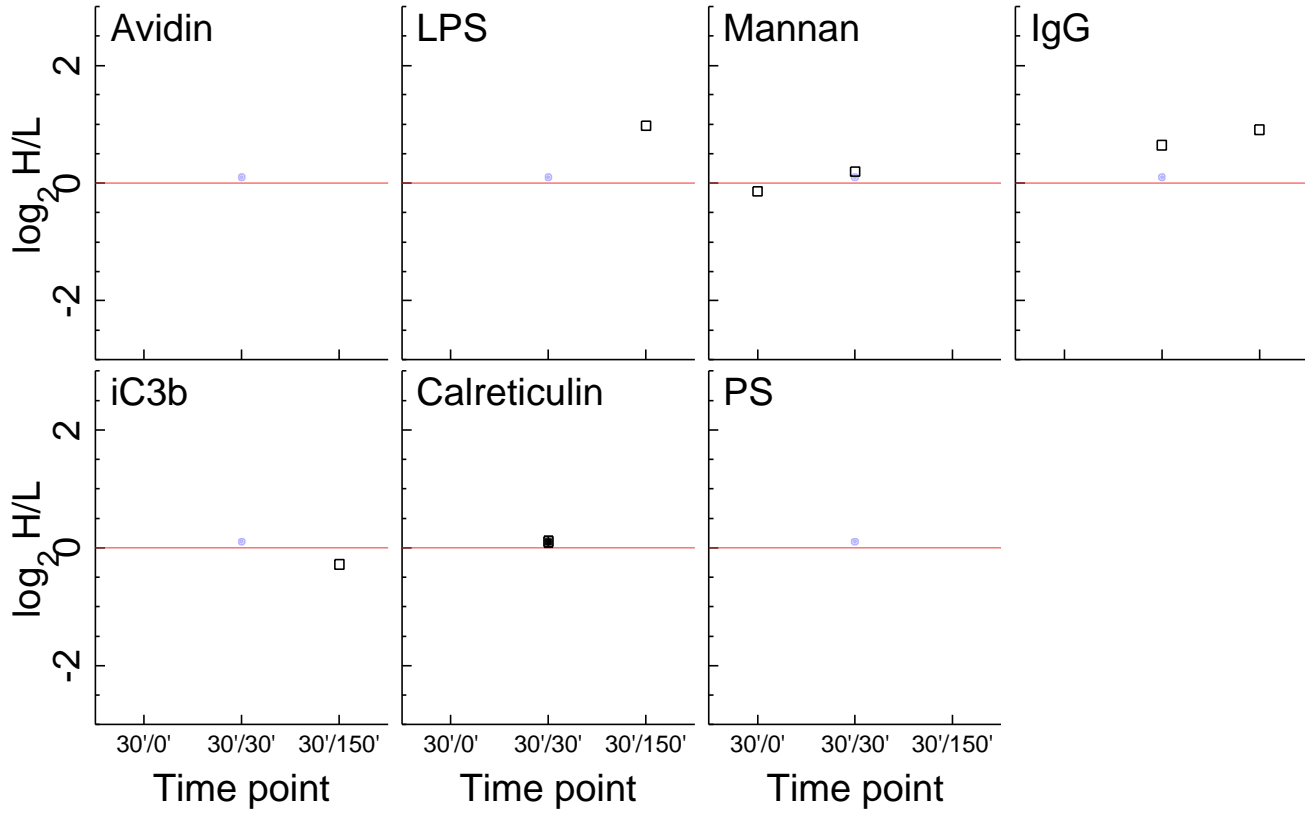

grb2 (Q60631)

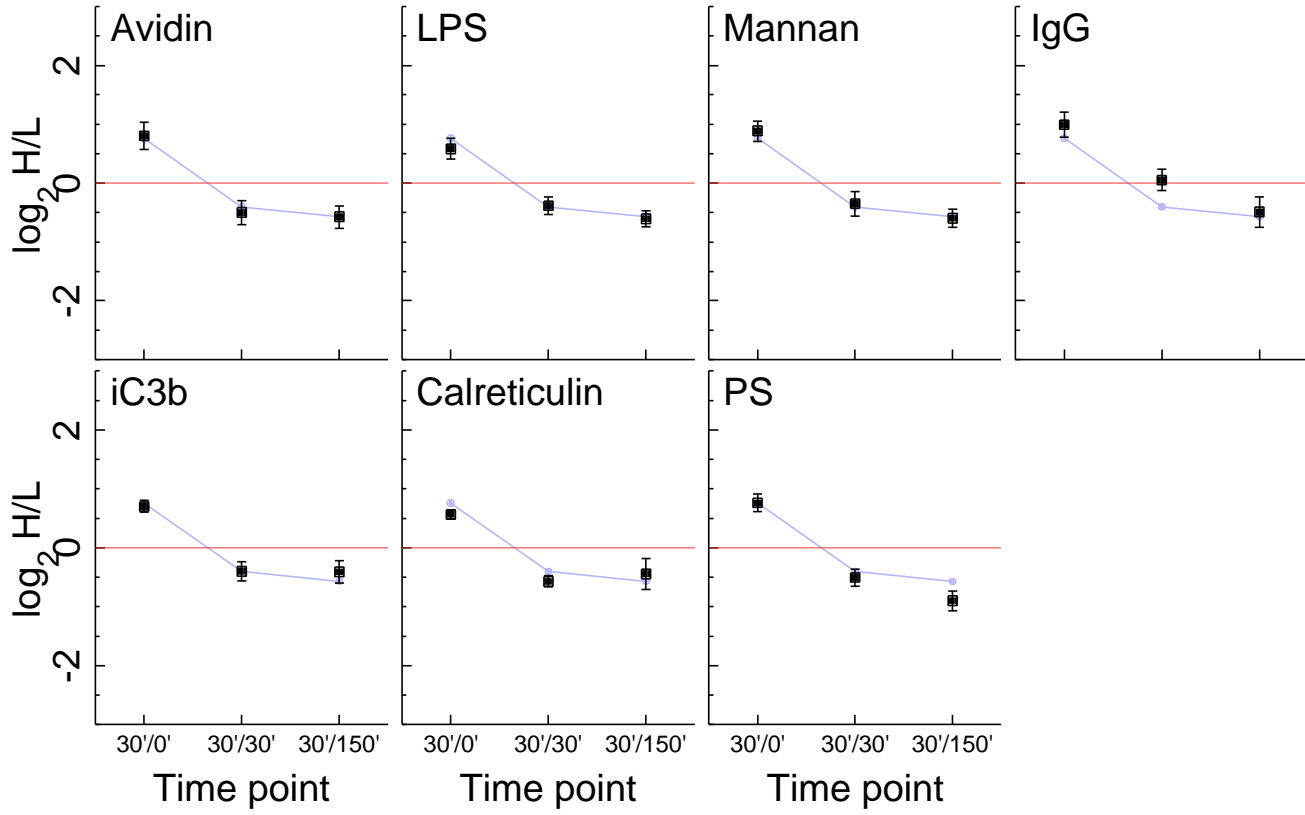



grn (Q3U9N4)

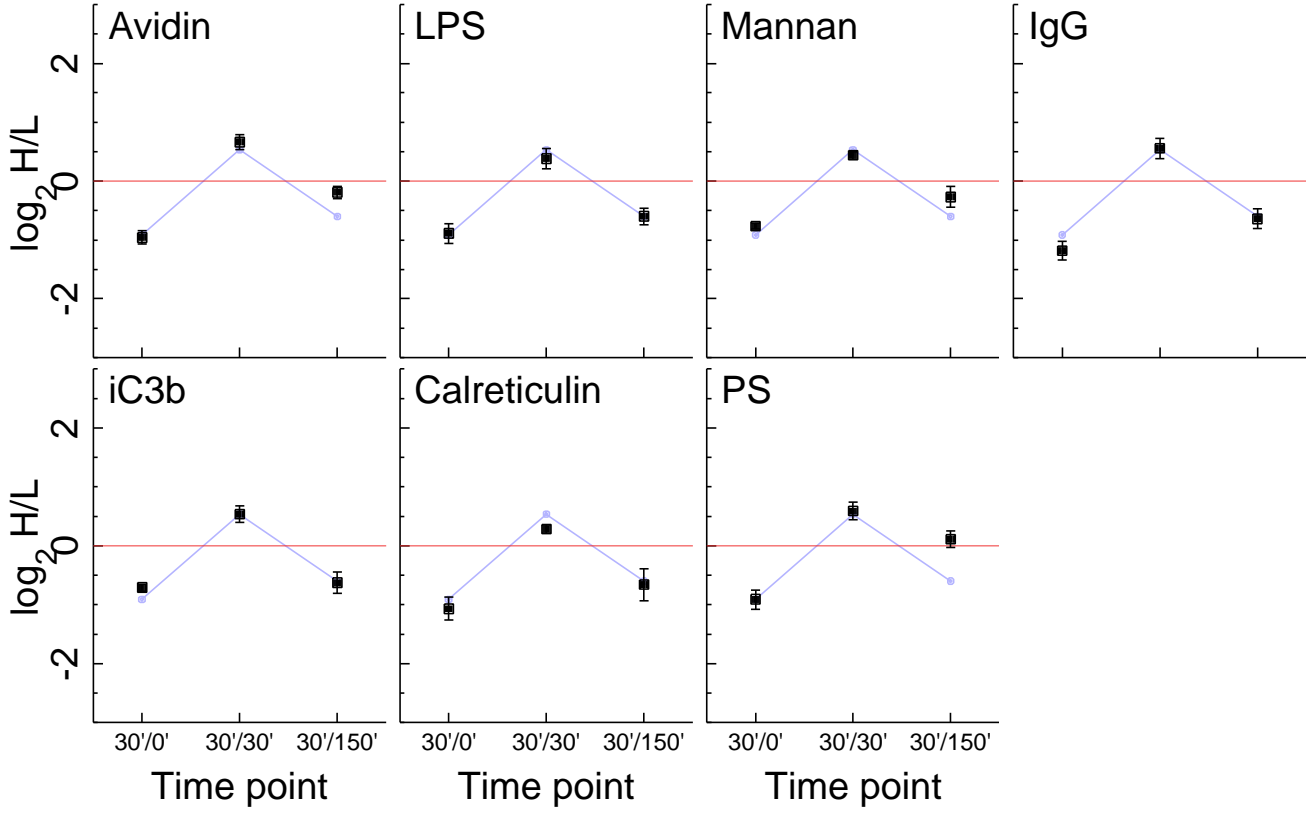

### grpel1 (Q99LP6)

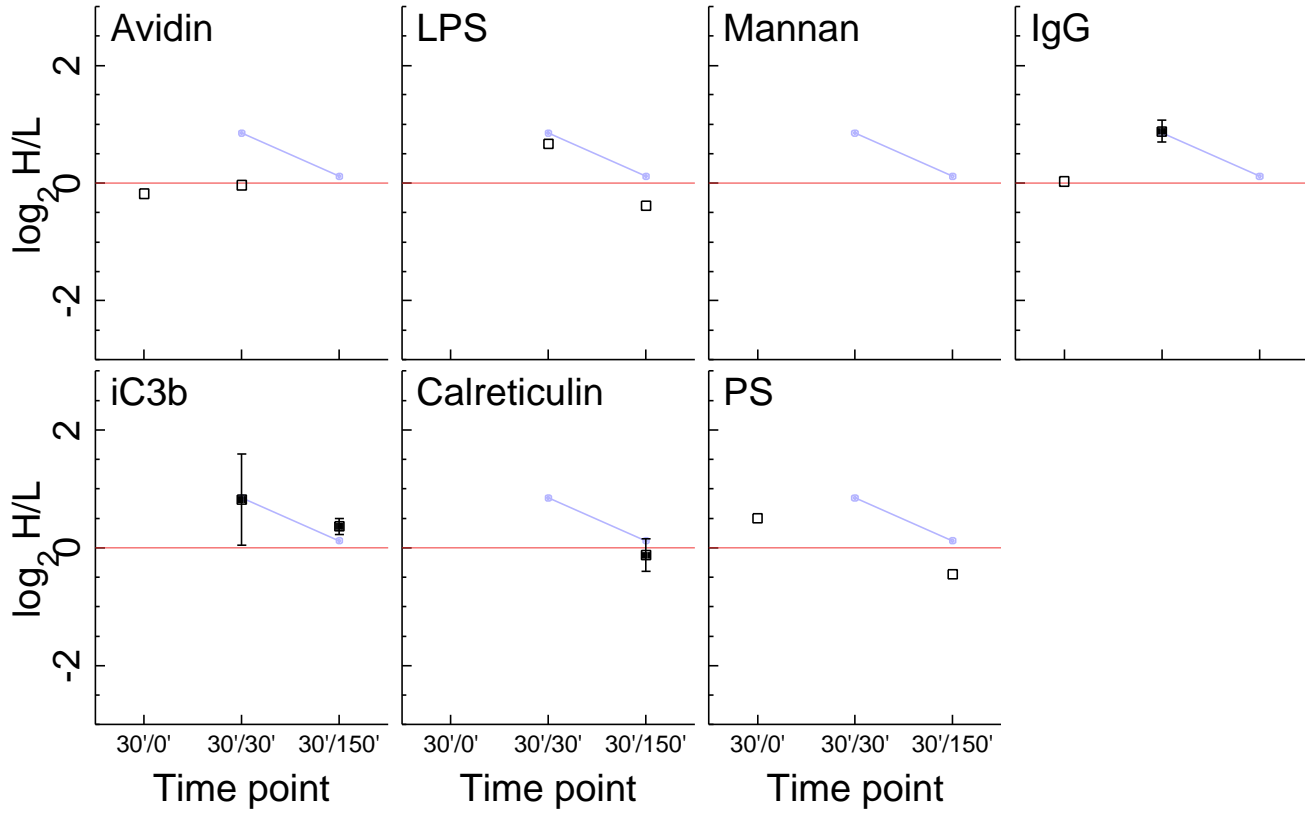

### gsdmdc1 (Q9D8T2)

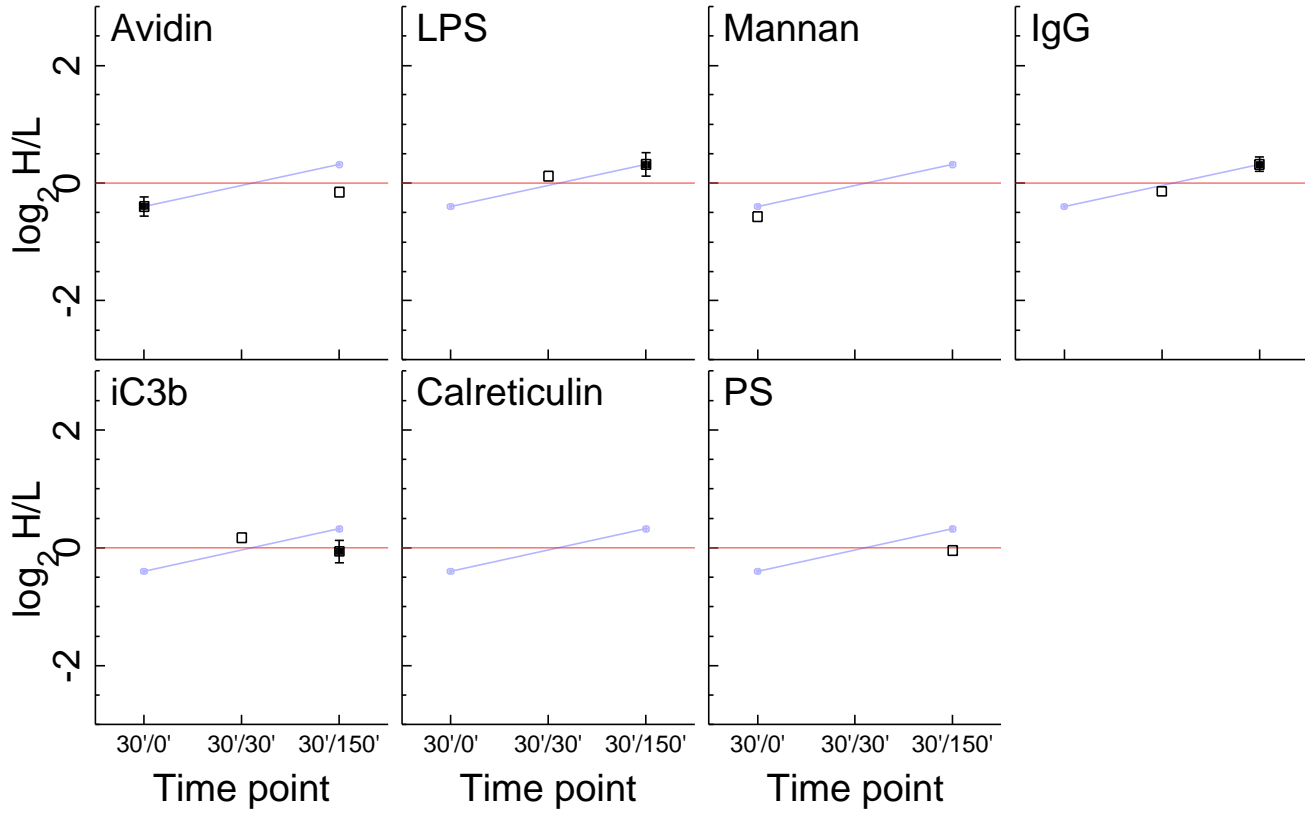

gsn (P13020)

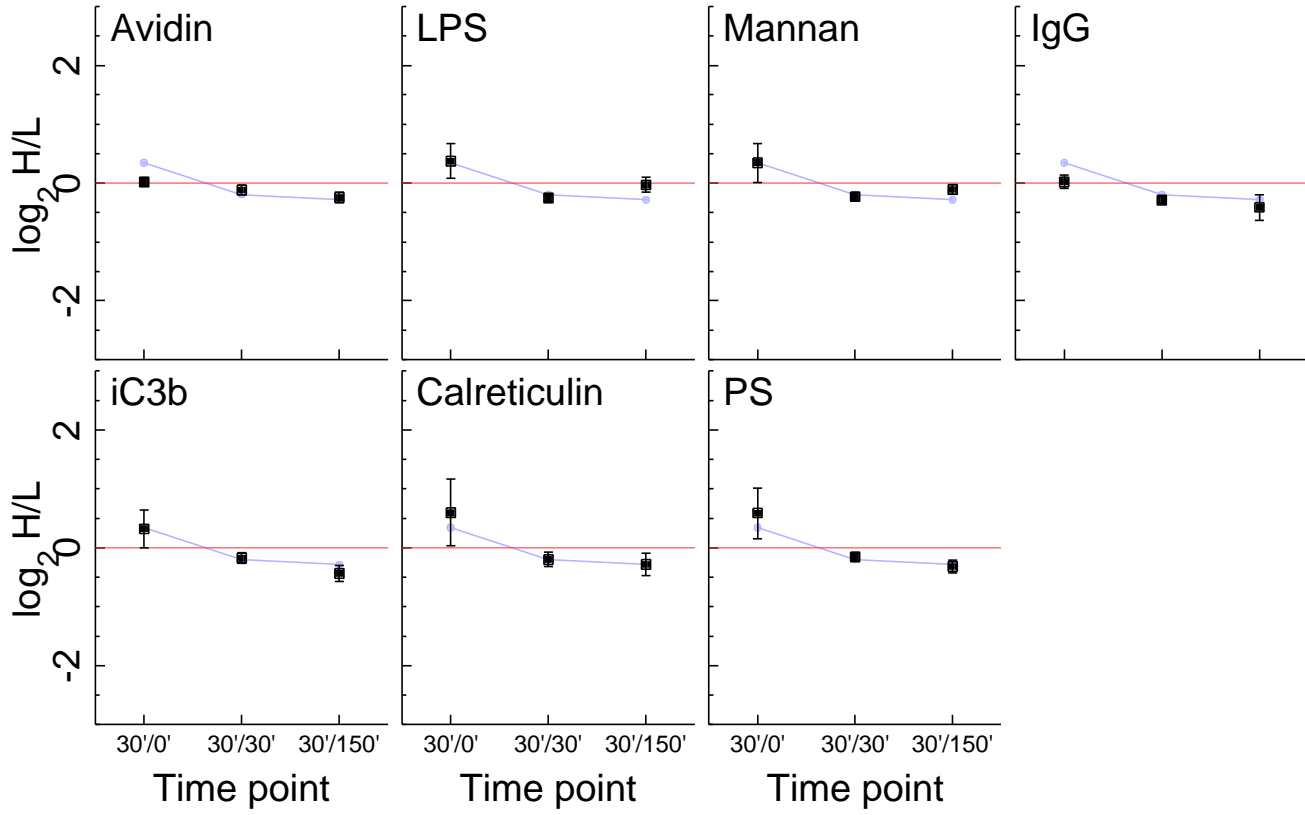

gsta1 (P13745)

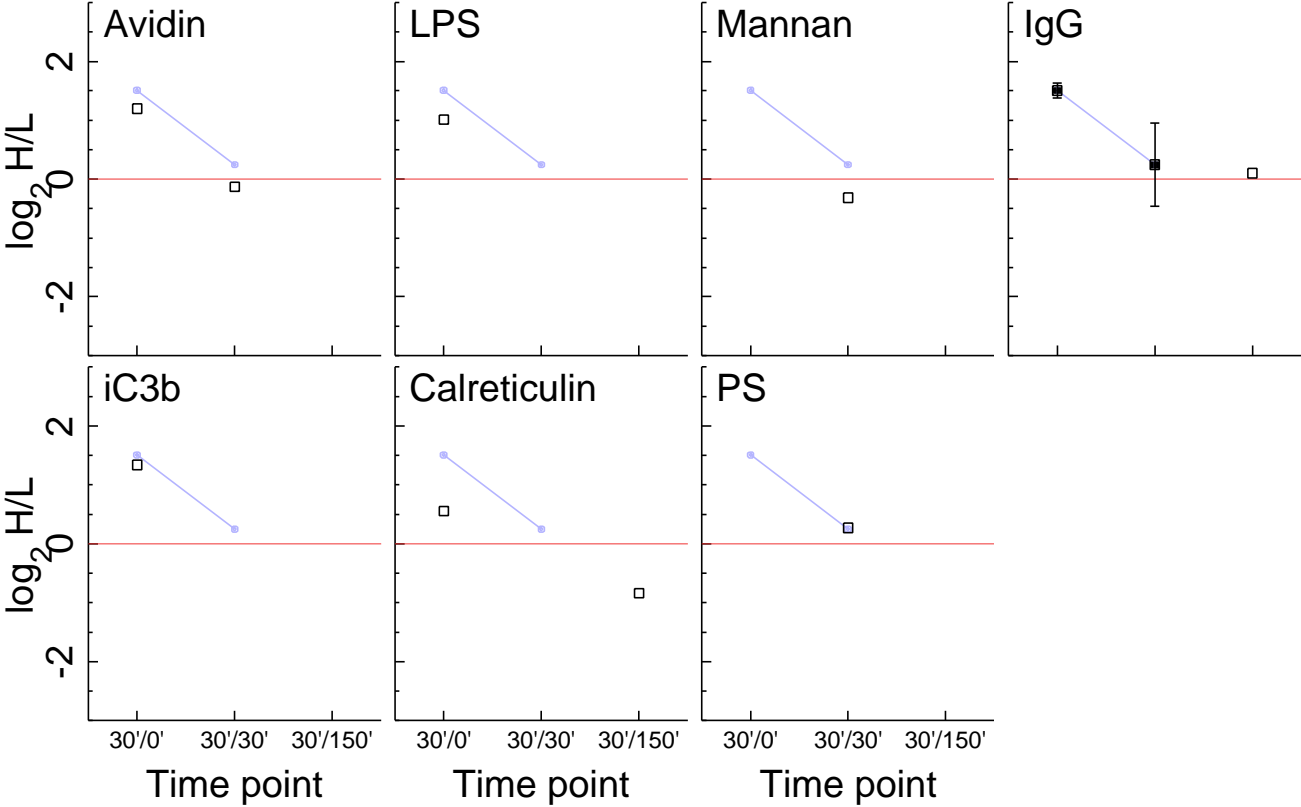

gstk1 (Q9DCM2)

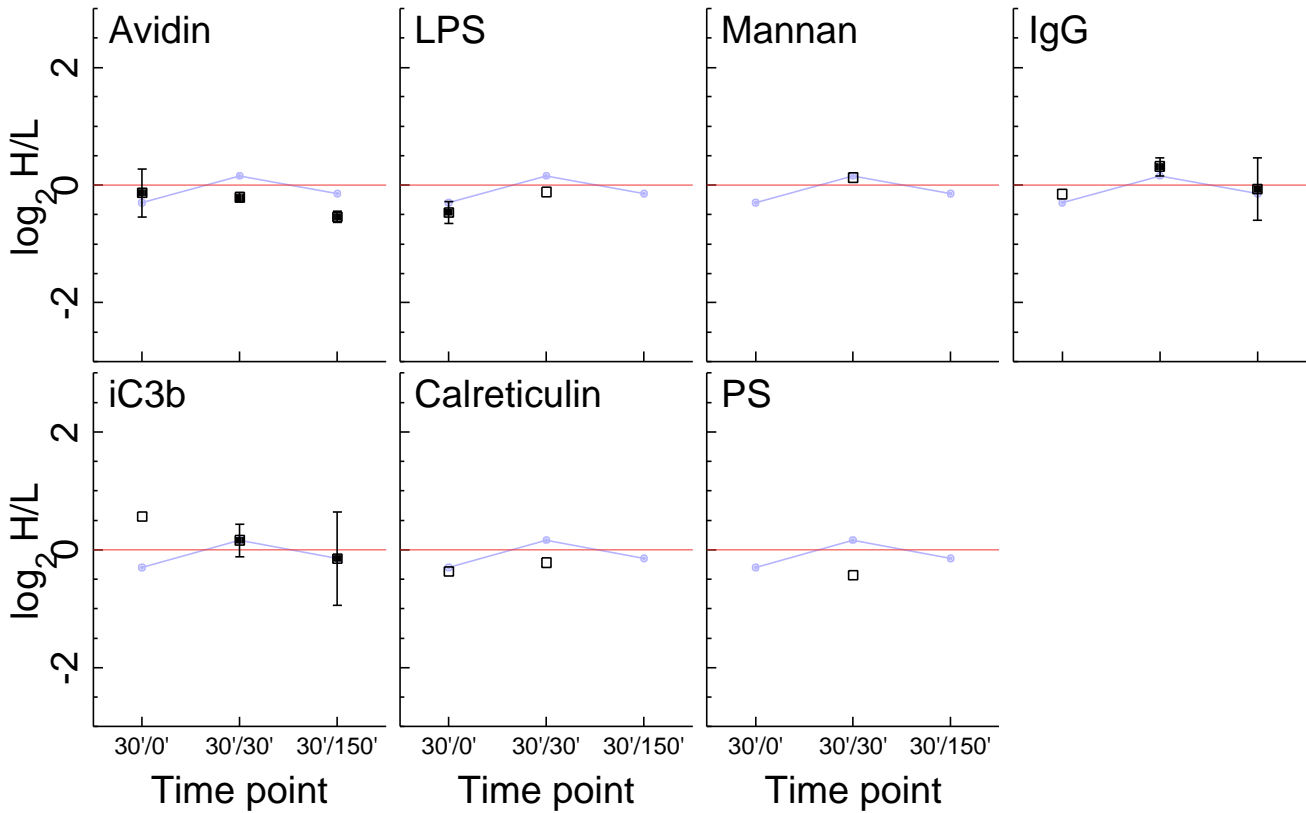

### gstm1 (P10649)

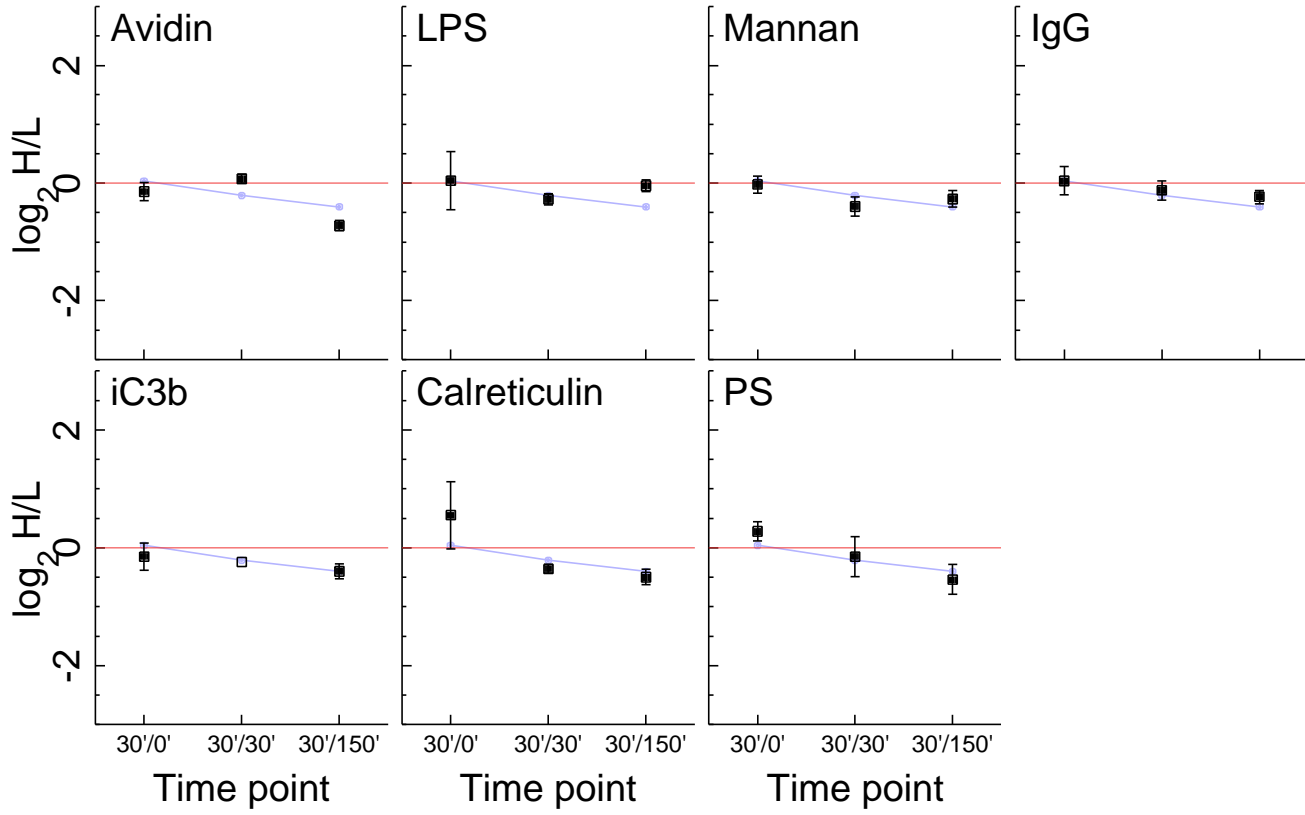

### gtf2f1 (Q3THK3)

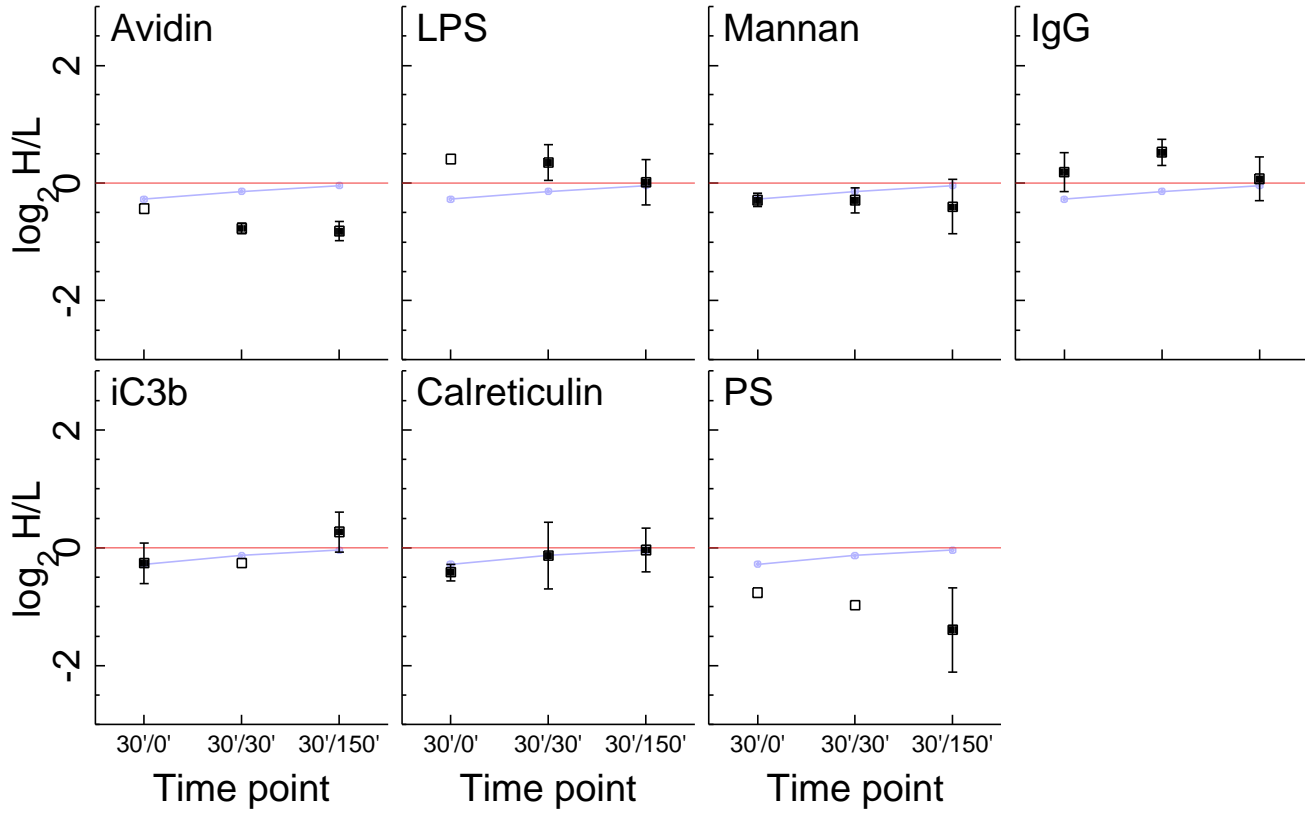



gtf2f2 (Q8R0A0)

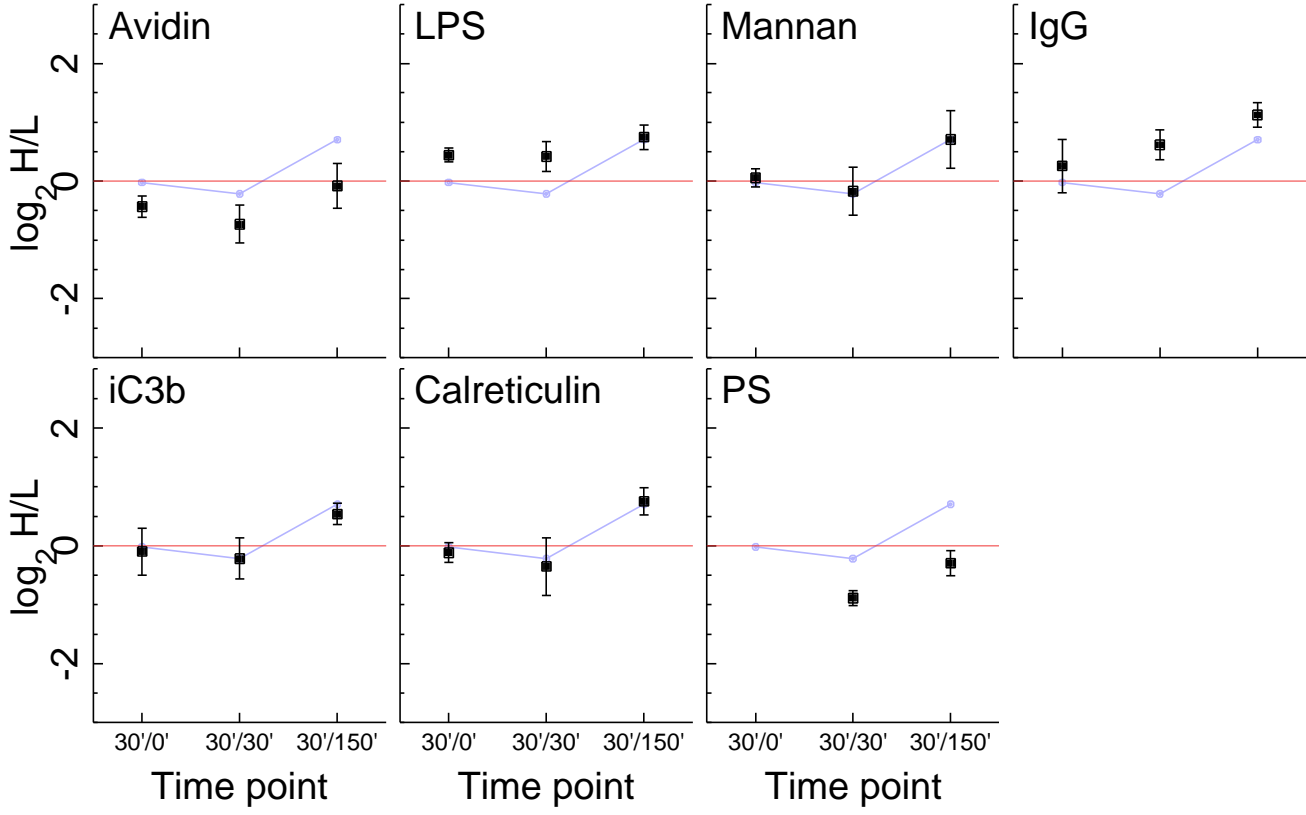

gusb (P12265)

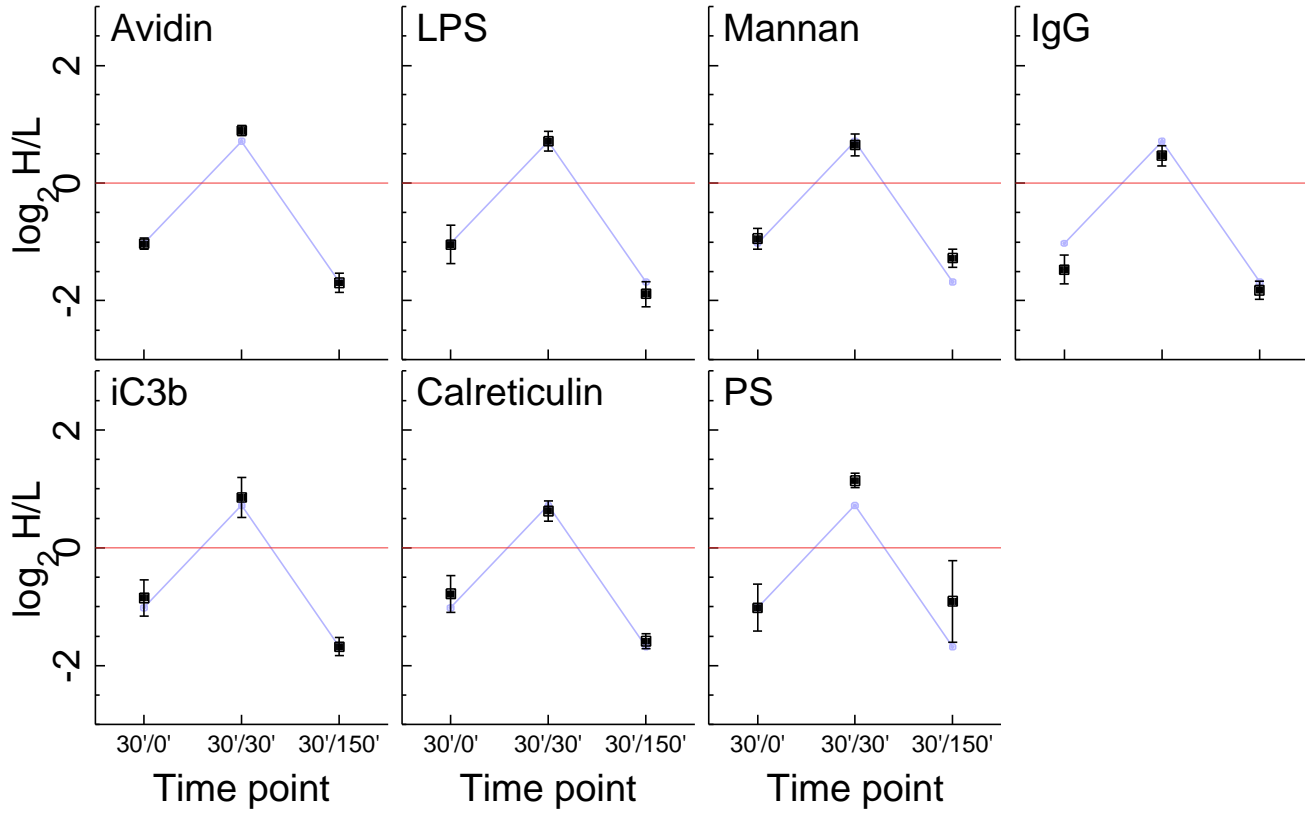

### gvin1 (F8WJ19)

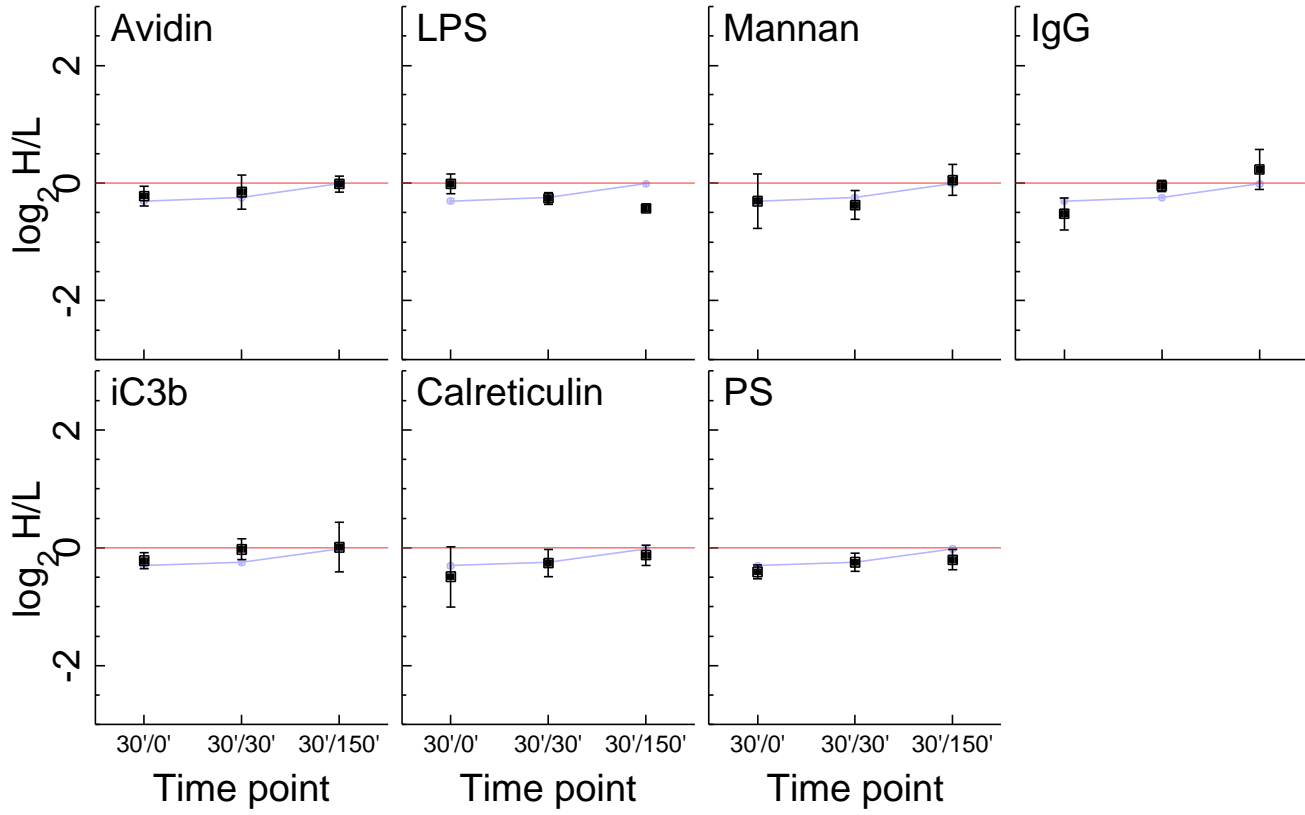

# h1f0 (P10922)

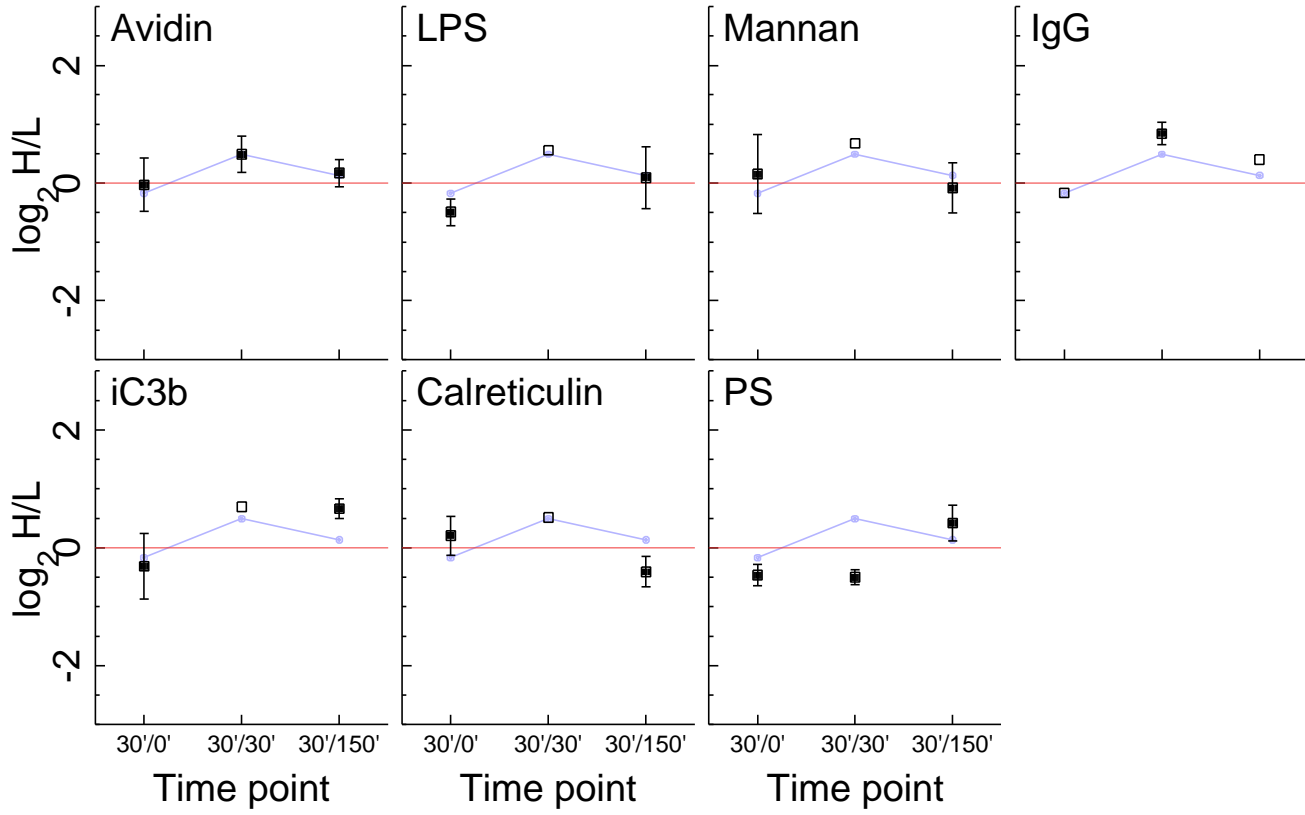

## h2-aa (P14434)

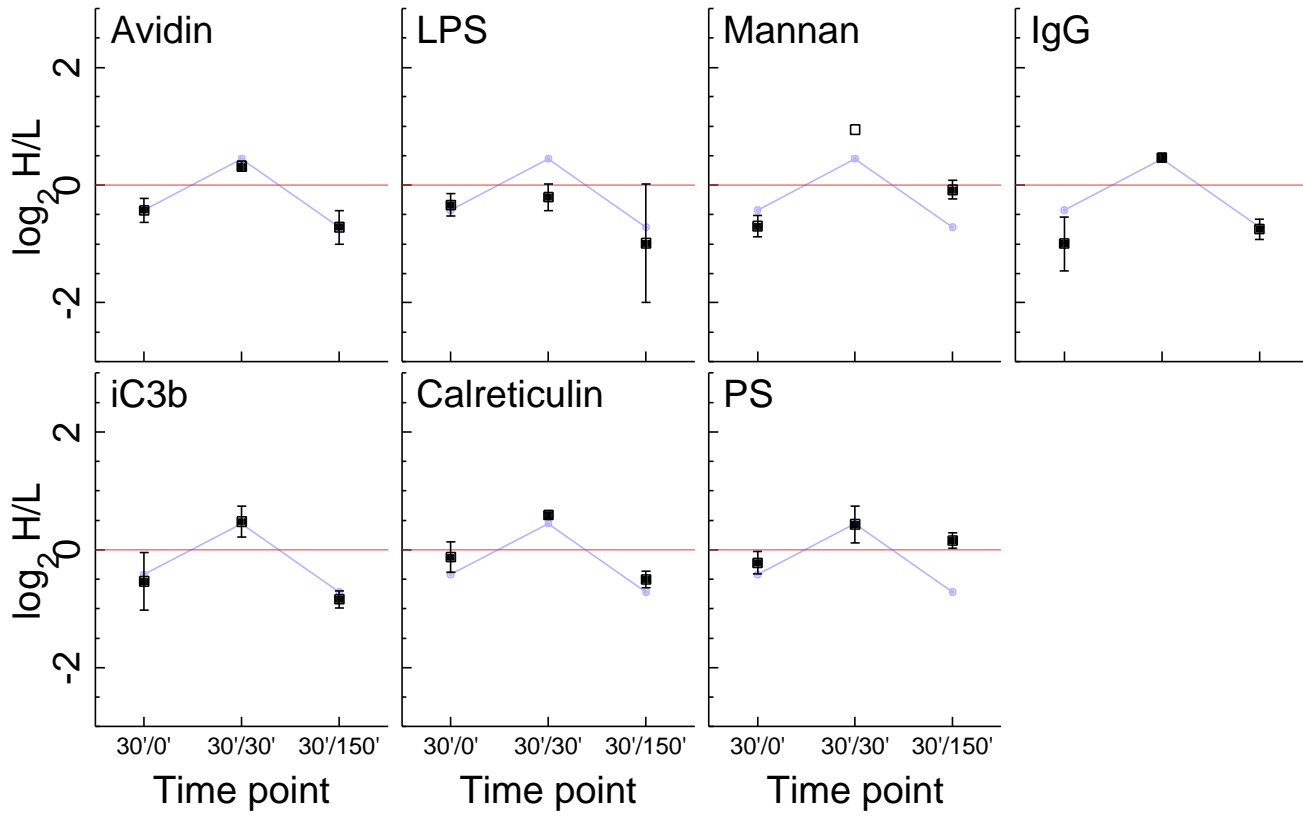

### h2-ab1 (P14483)

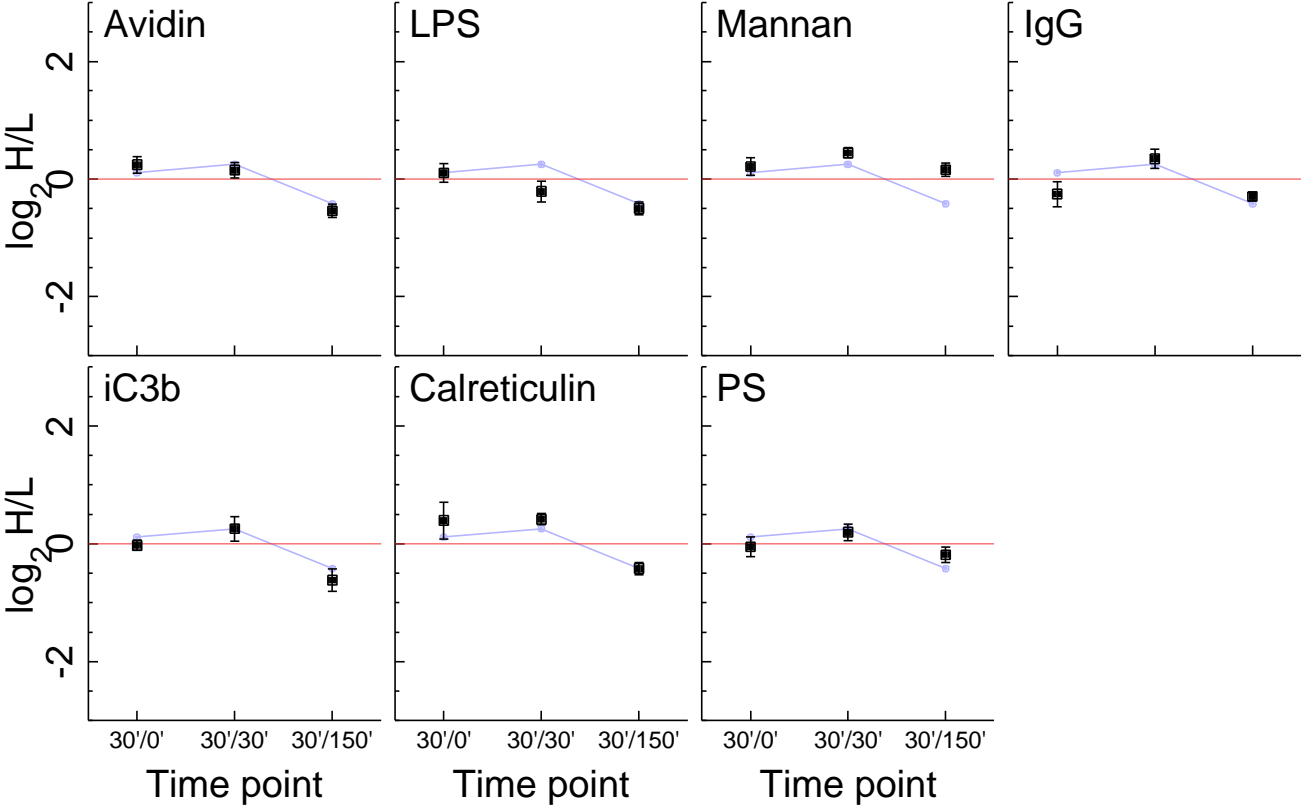

h2afx (P27661)

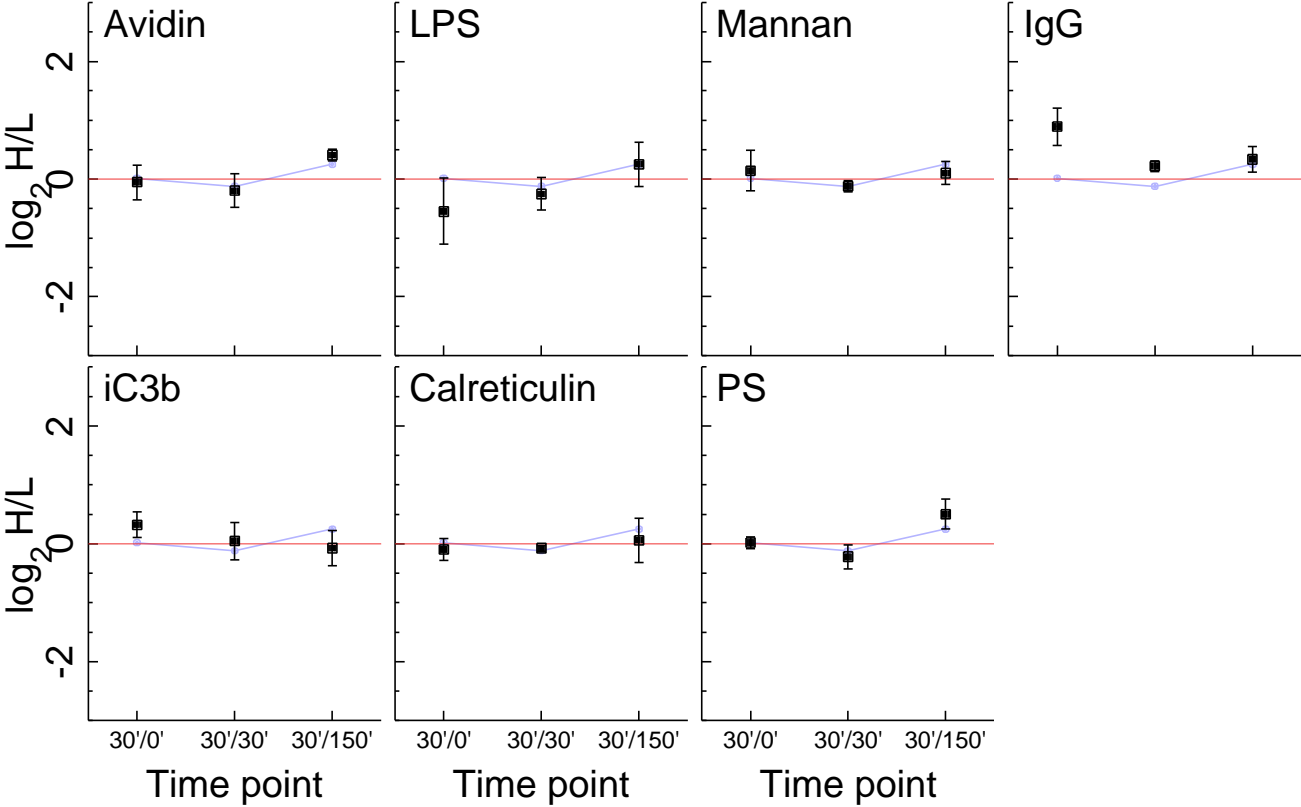

## h2afy (Q9QZQ8)

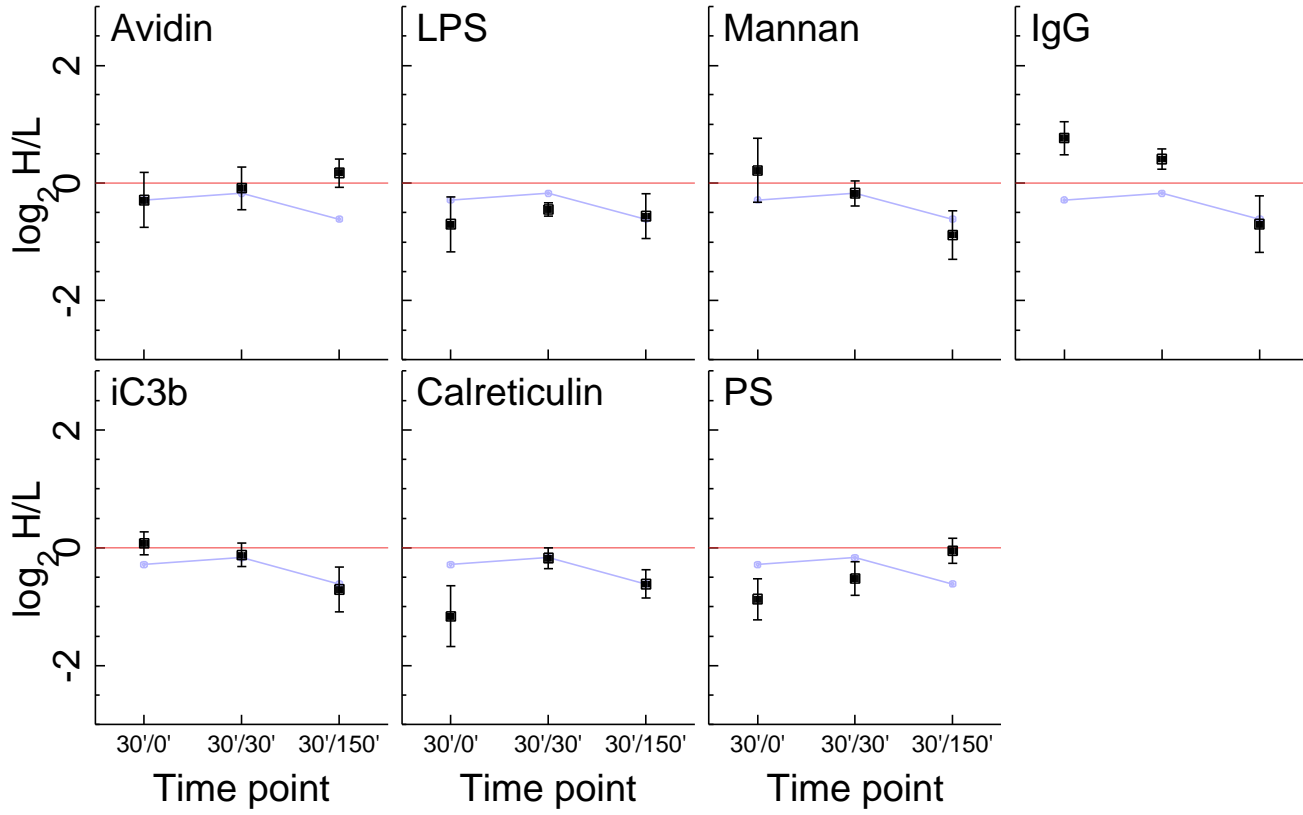



## h2afz (P0C0S6)

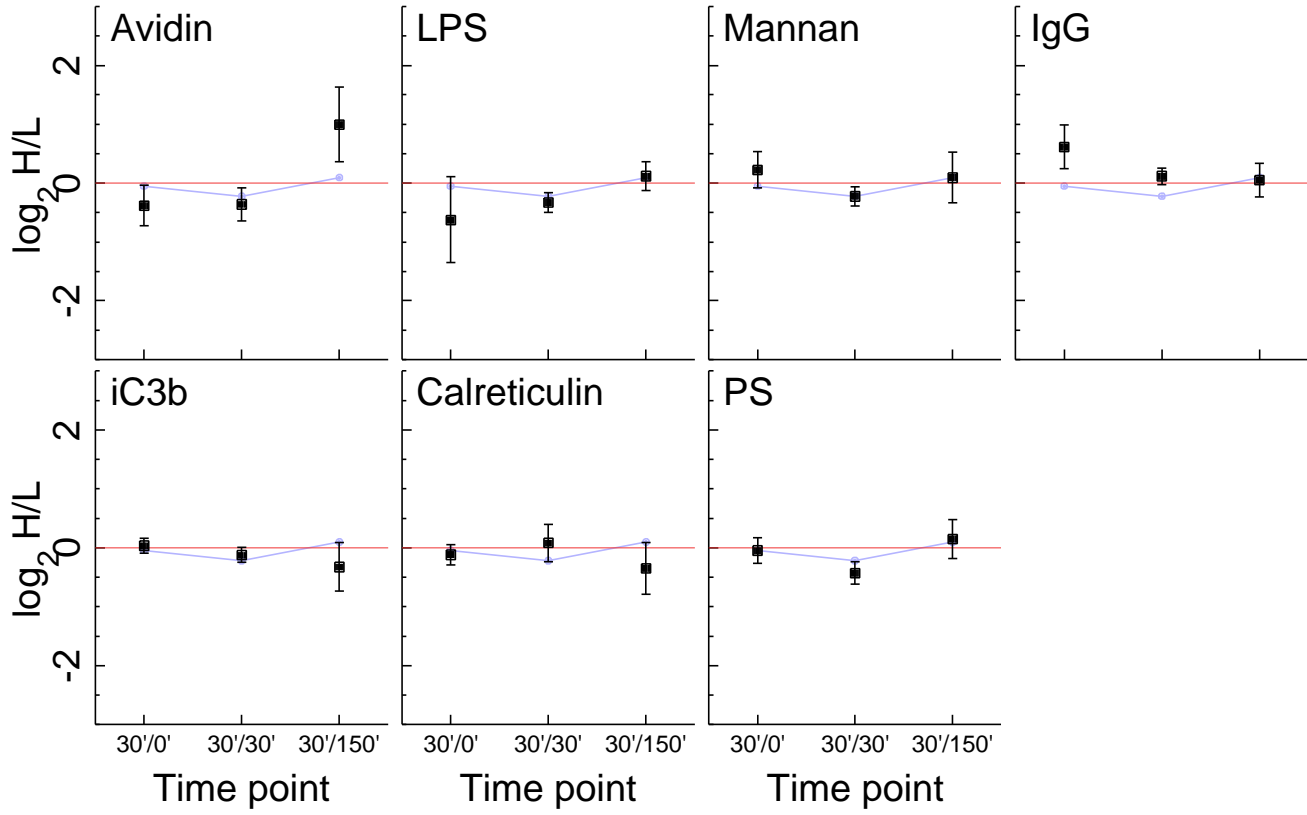

## h2-d1:1 (P01899)

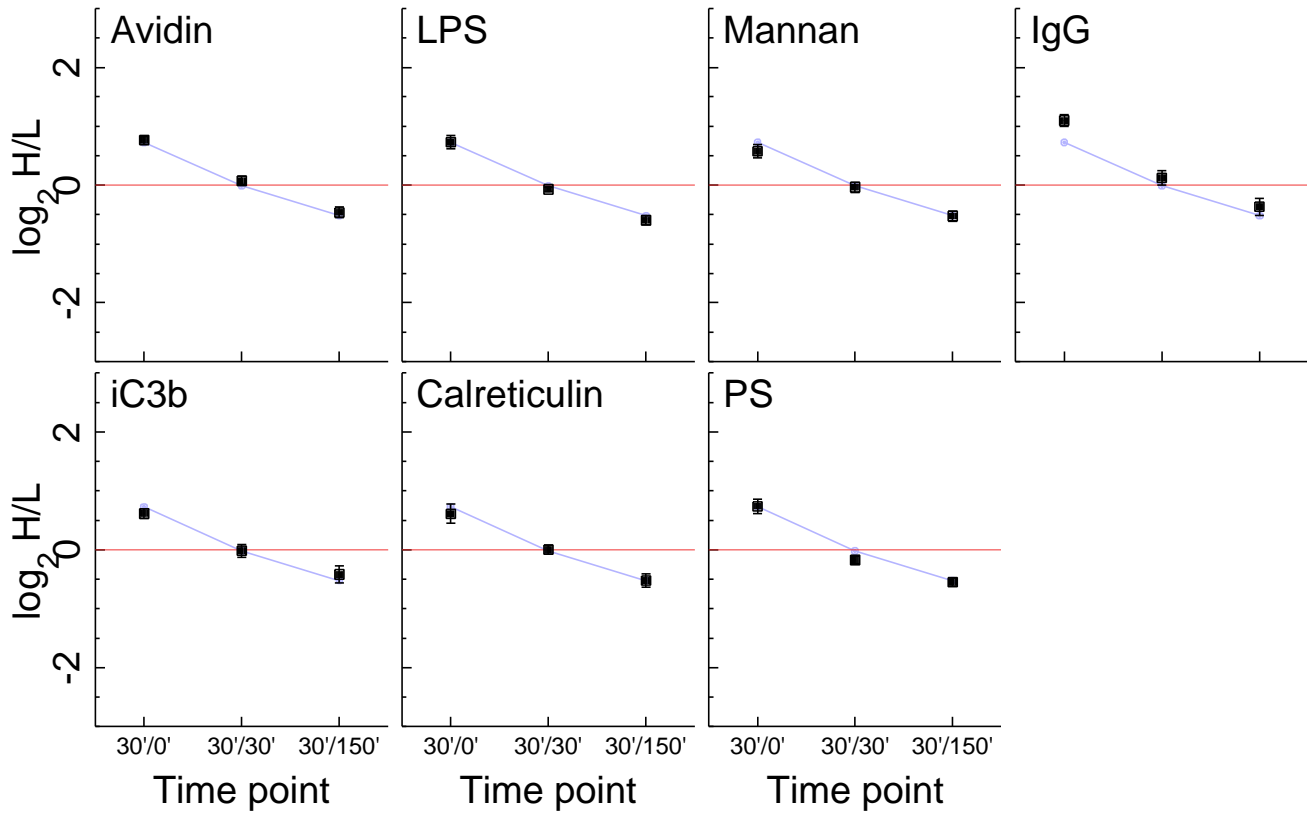

## h2-d1:2 (P01900)

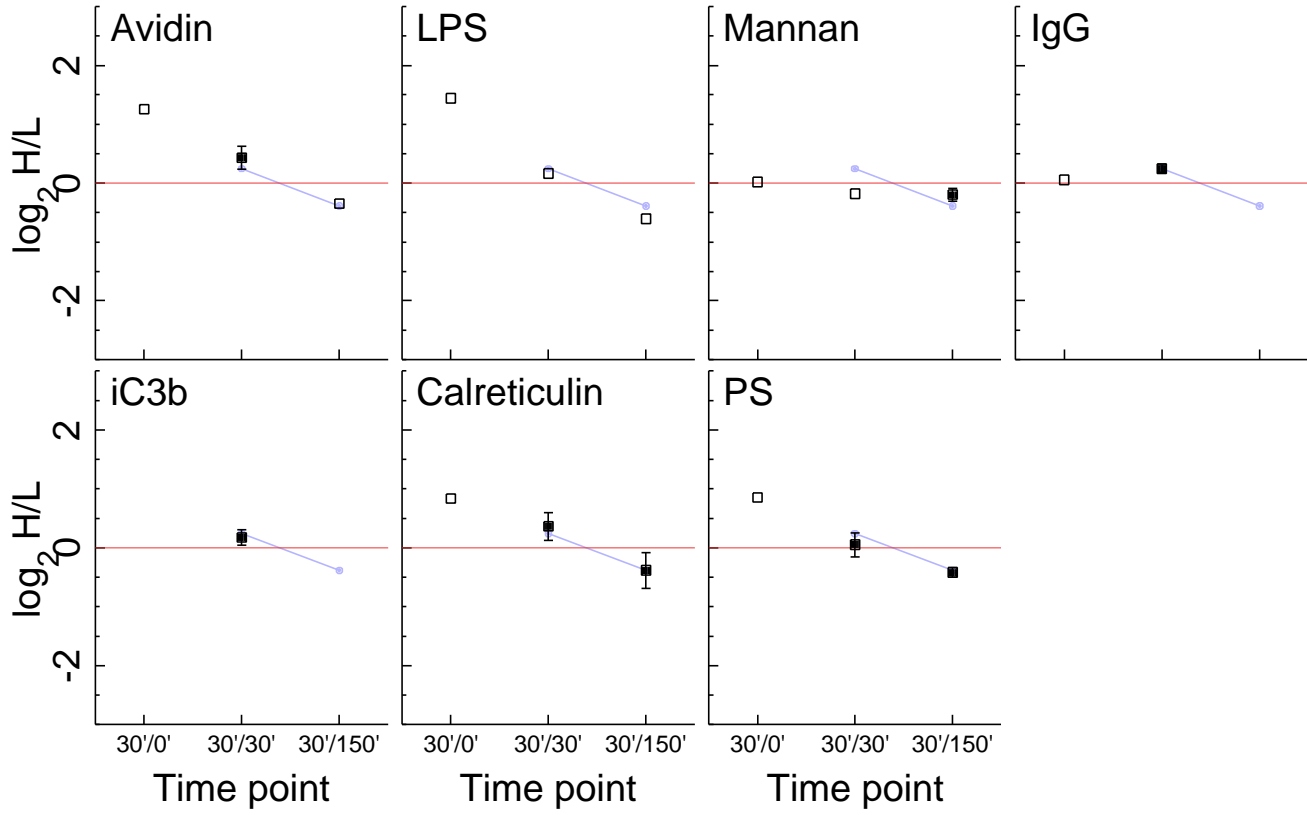

## h2-dma (Q31621)

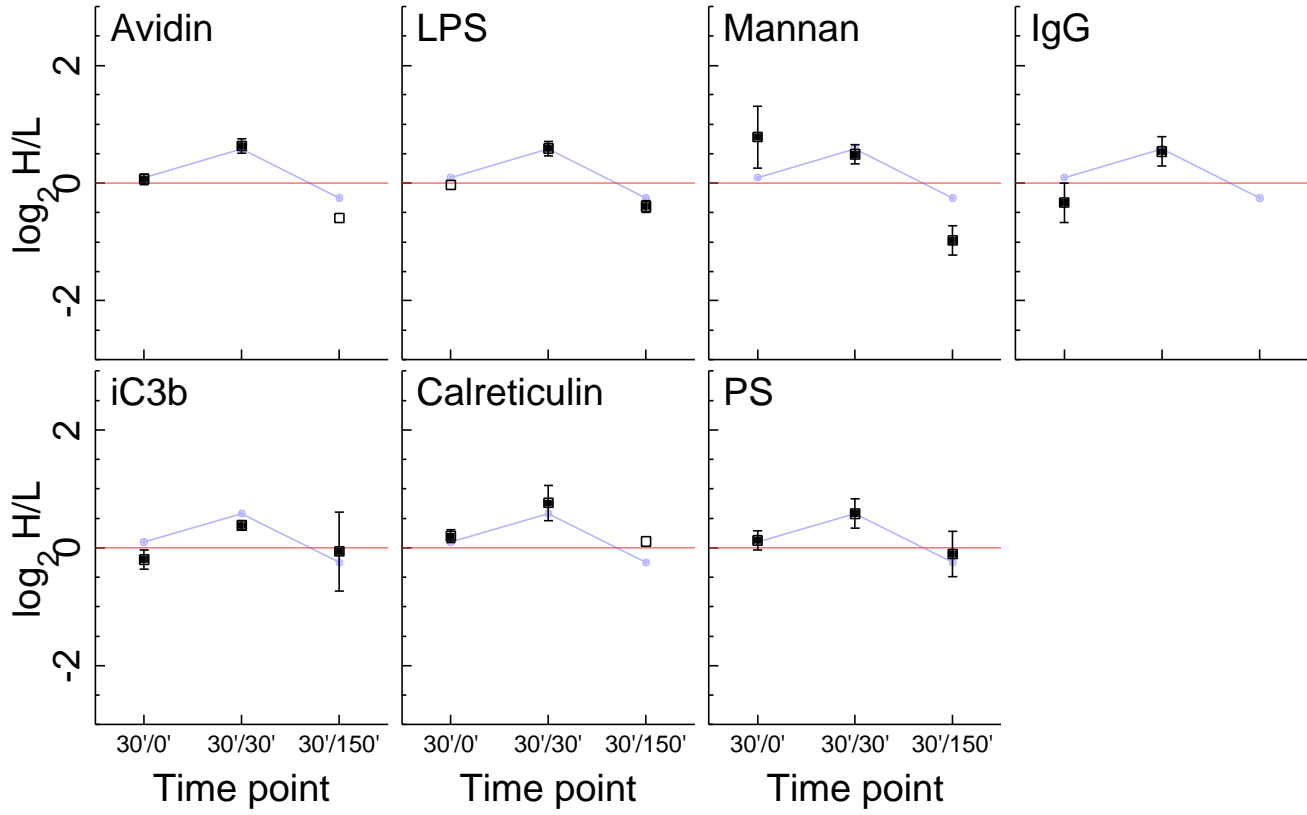

## h2-dmb1 (Q31094)

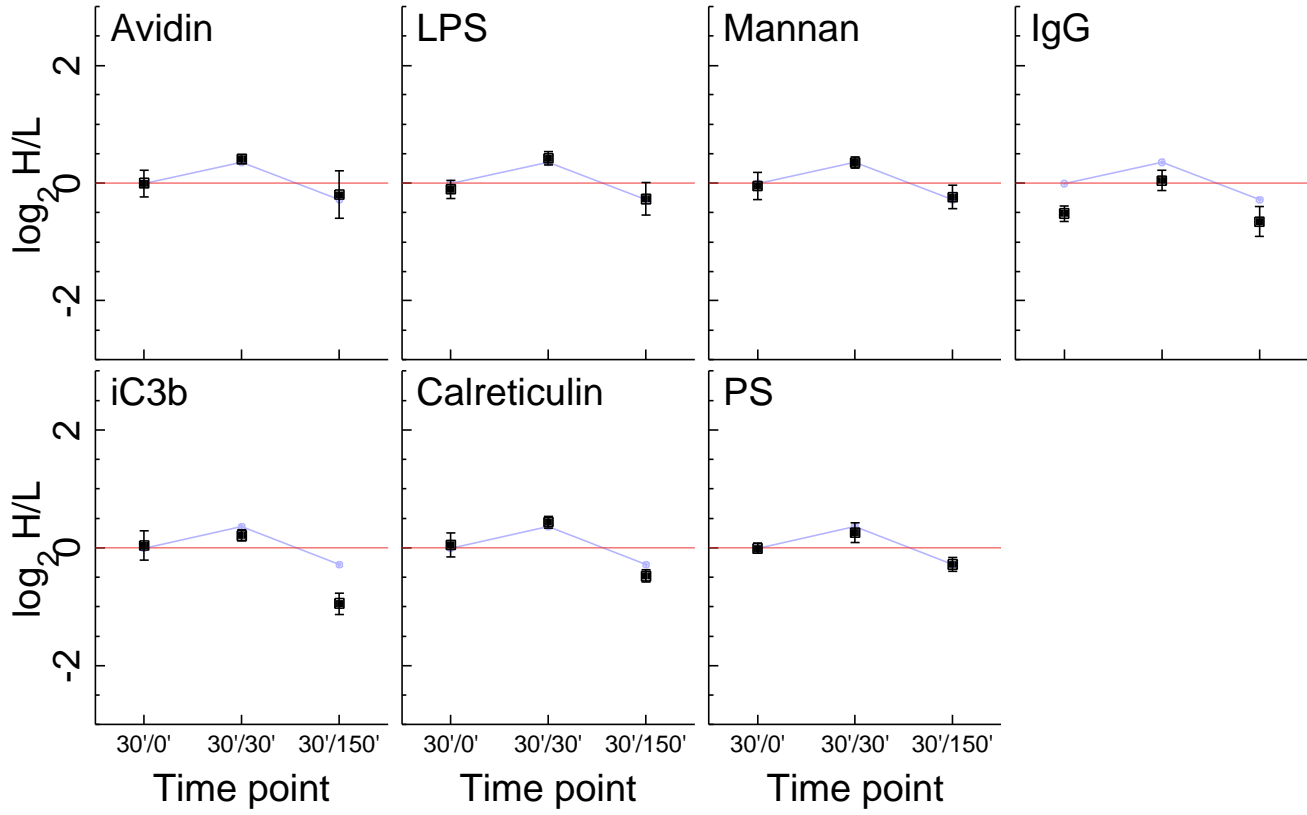

## h2-k1 (P01901)

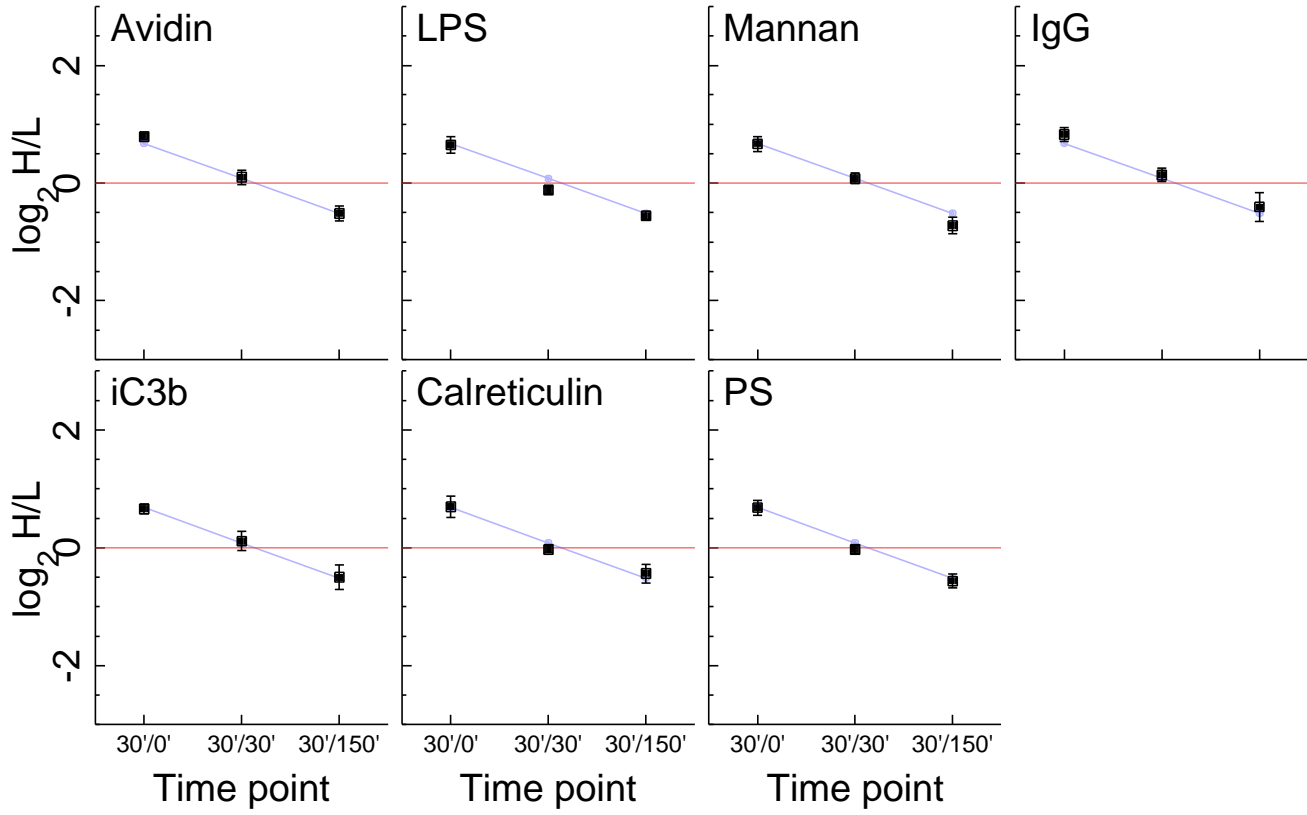

## h2-t23 (P06339)

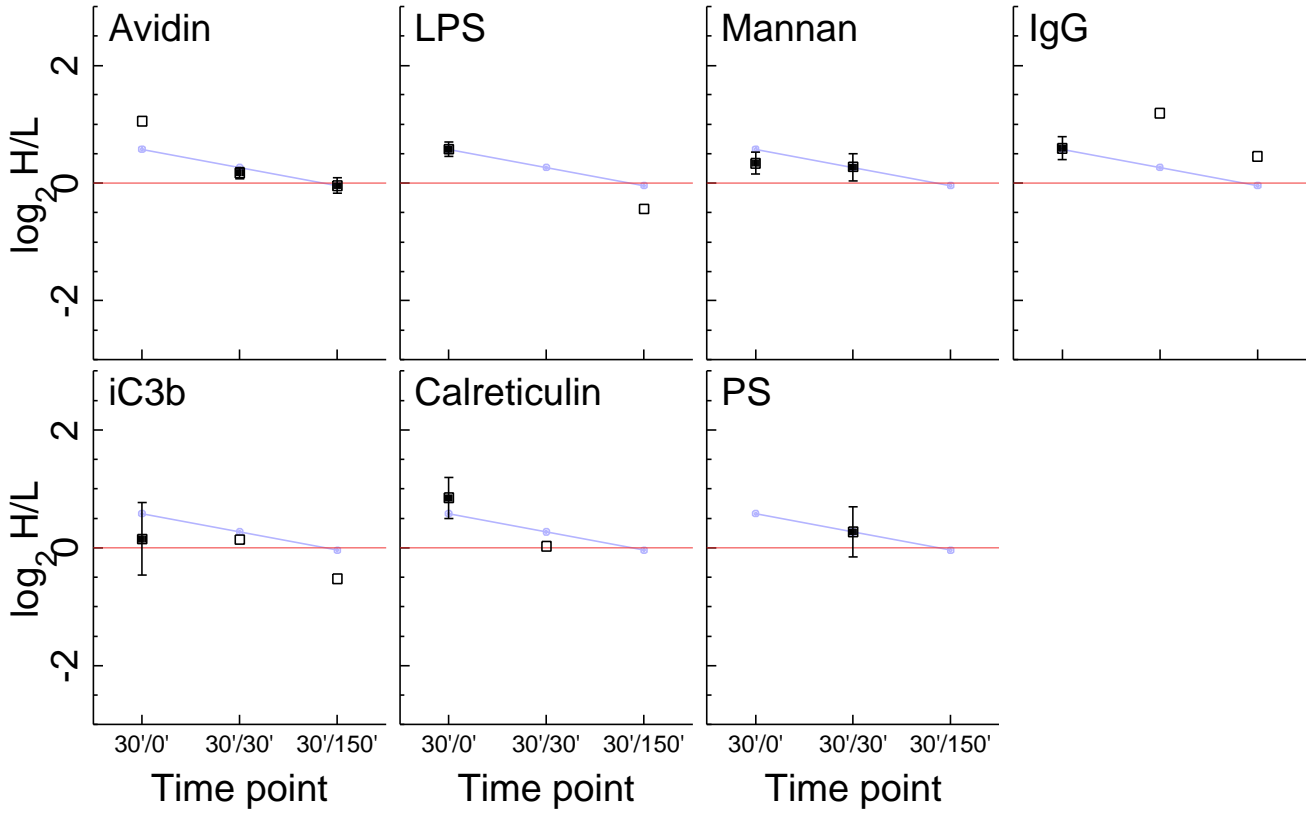

# hadha (Q8BMS1)

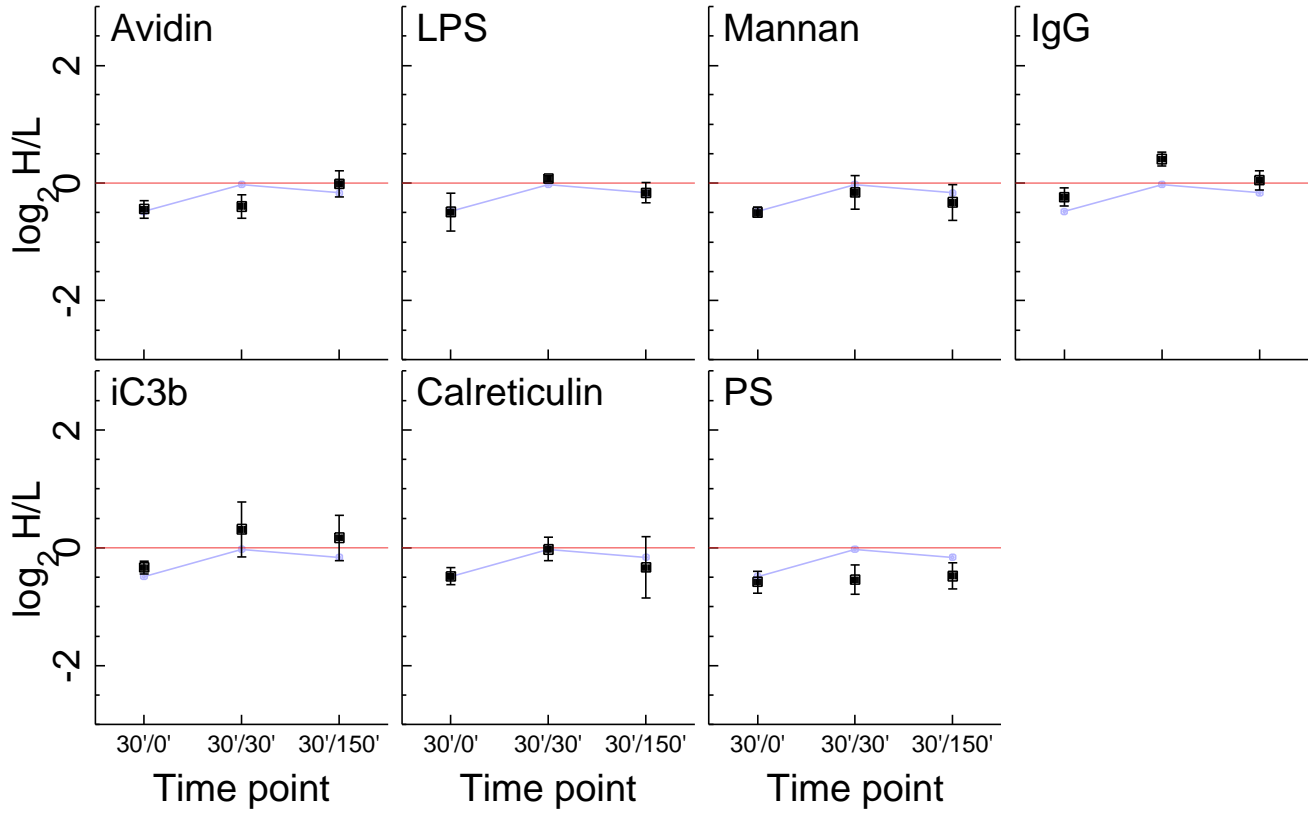



### hadhb (Q99JY0)

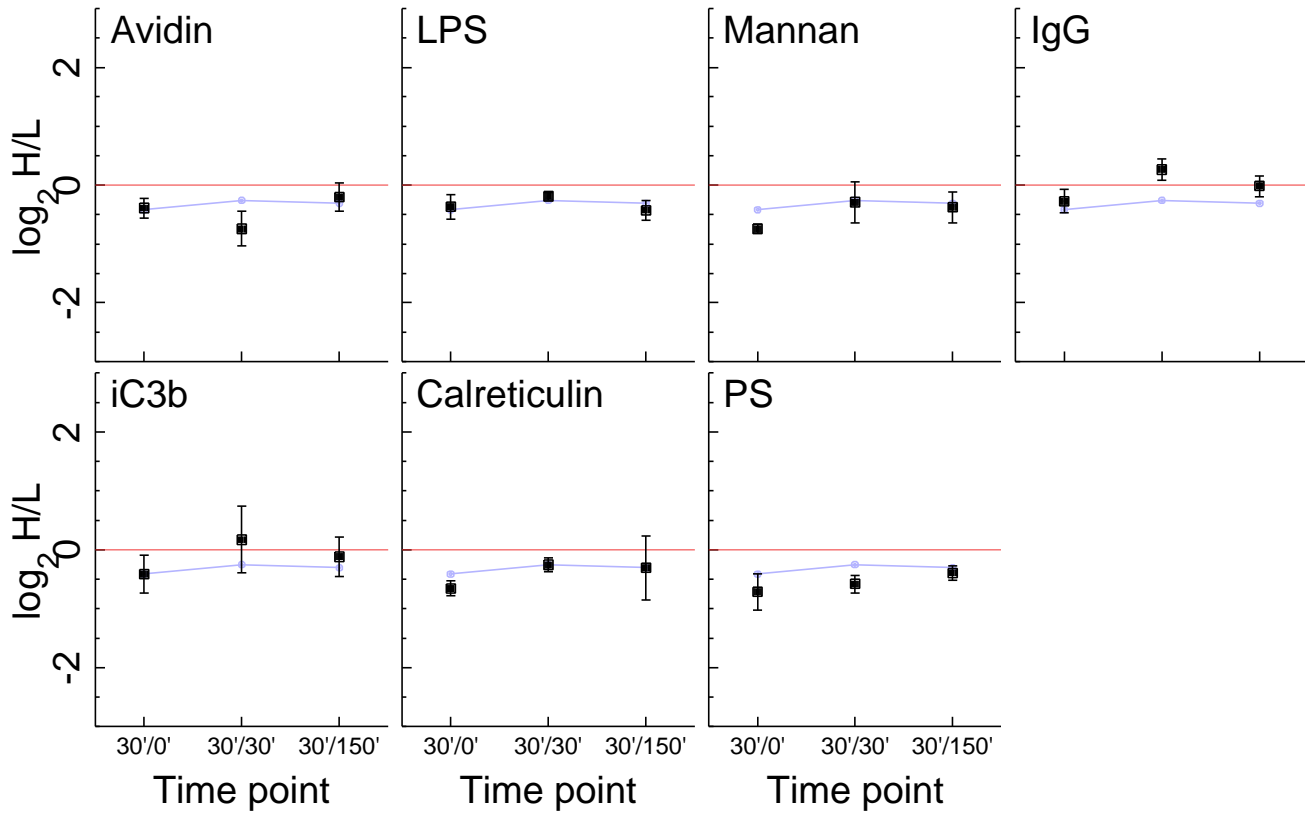

### hba (P01942)

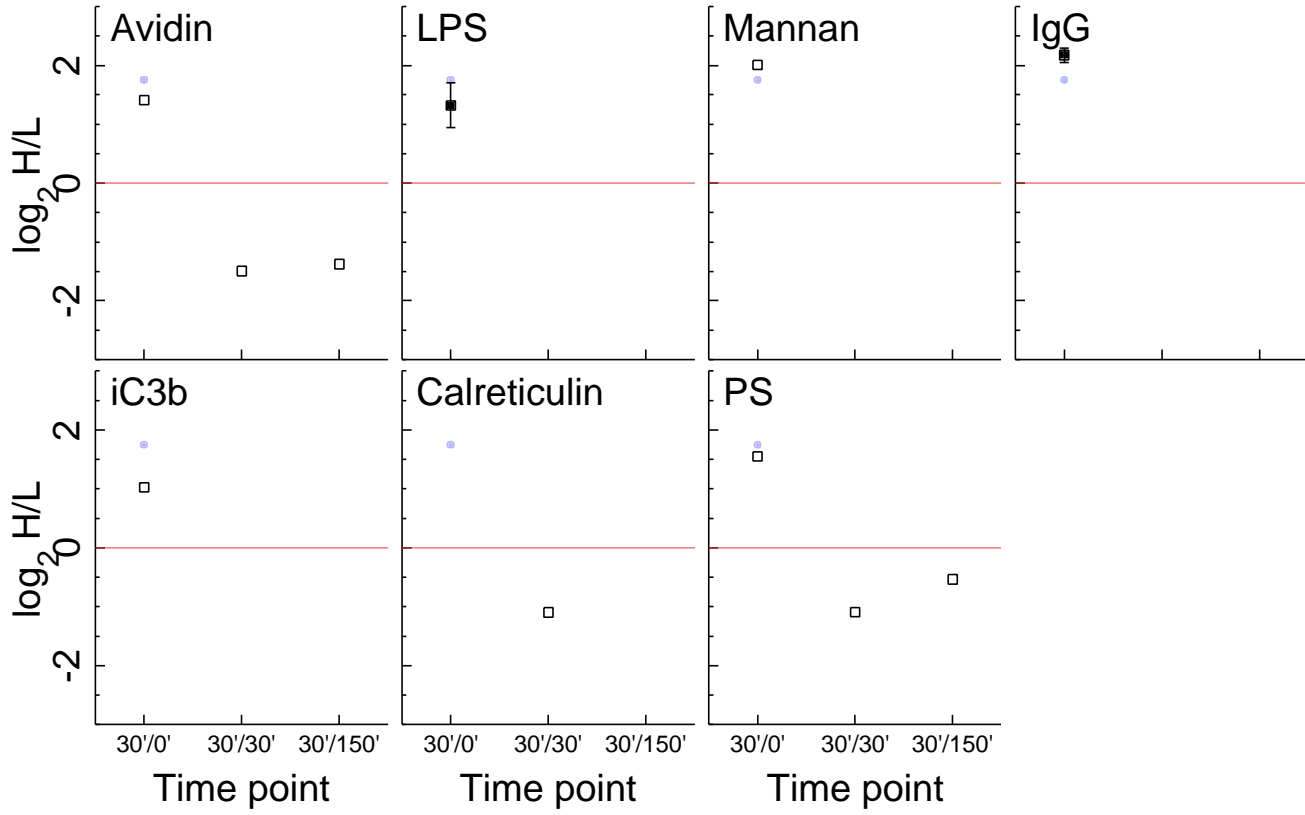

### hbxiip (G3UW70)

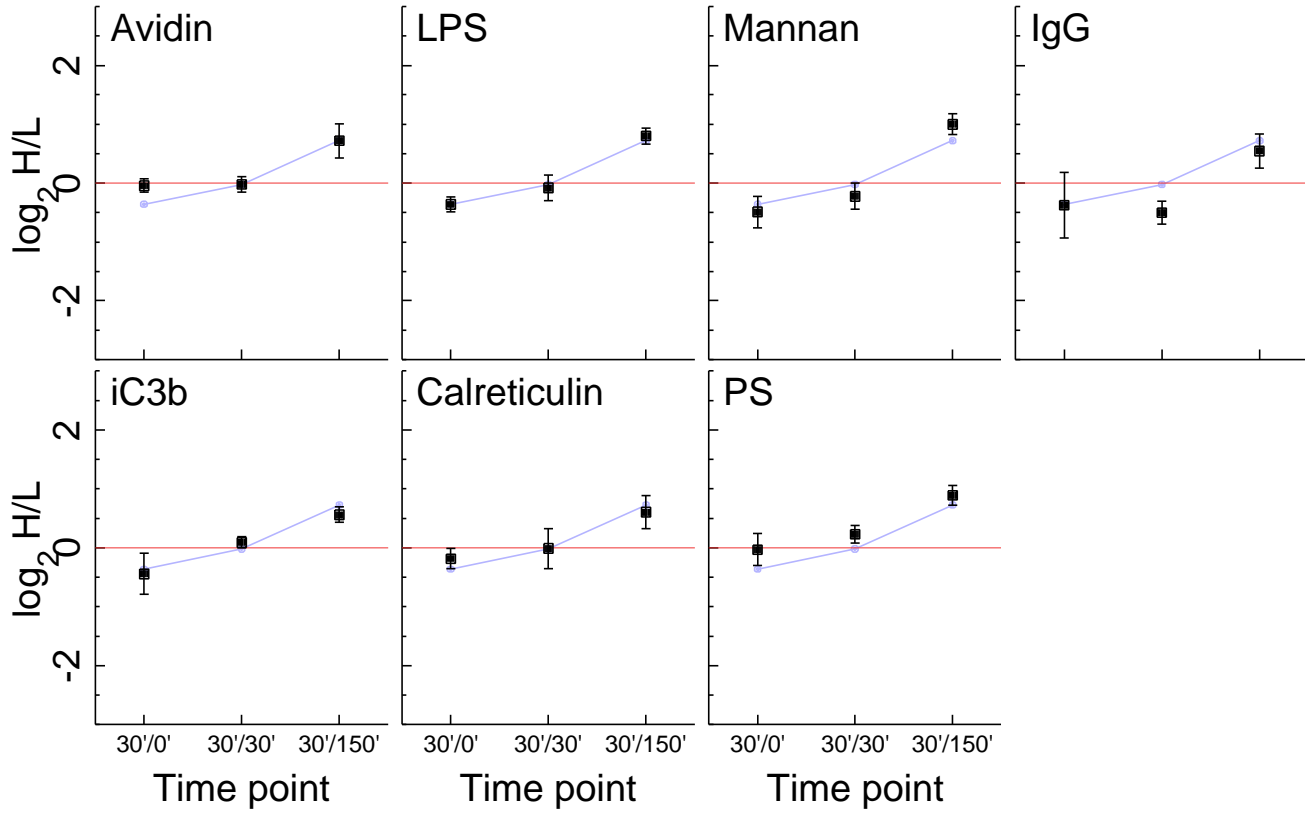

### hck (F6UND7)

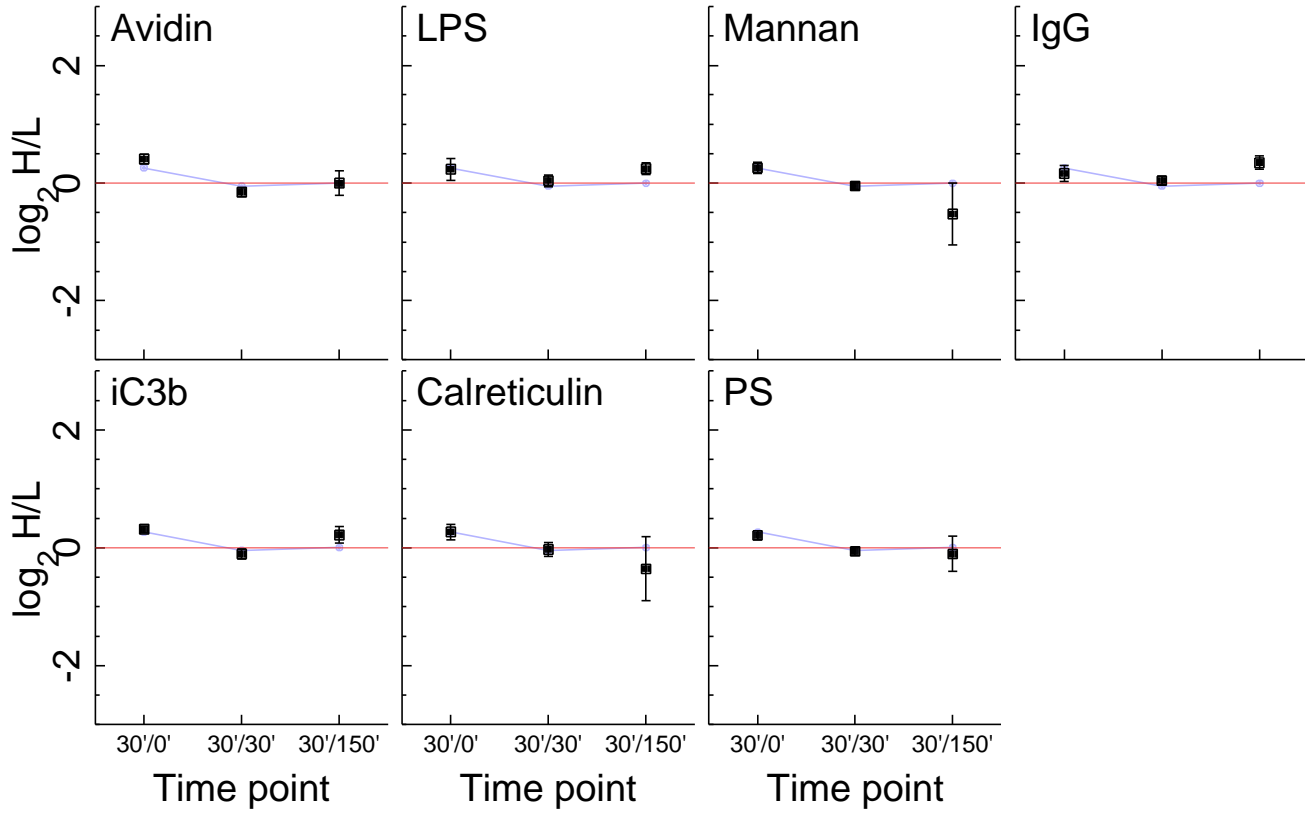

### hcls1 (P49710)

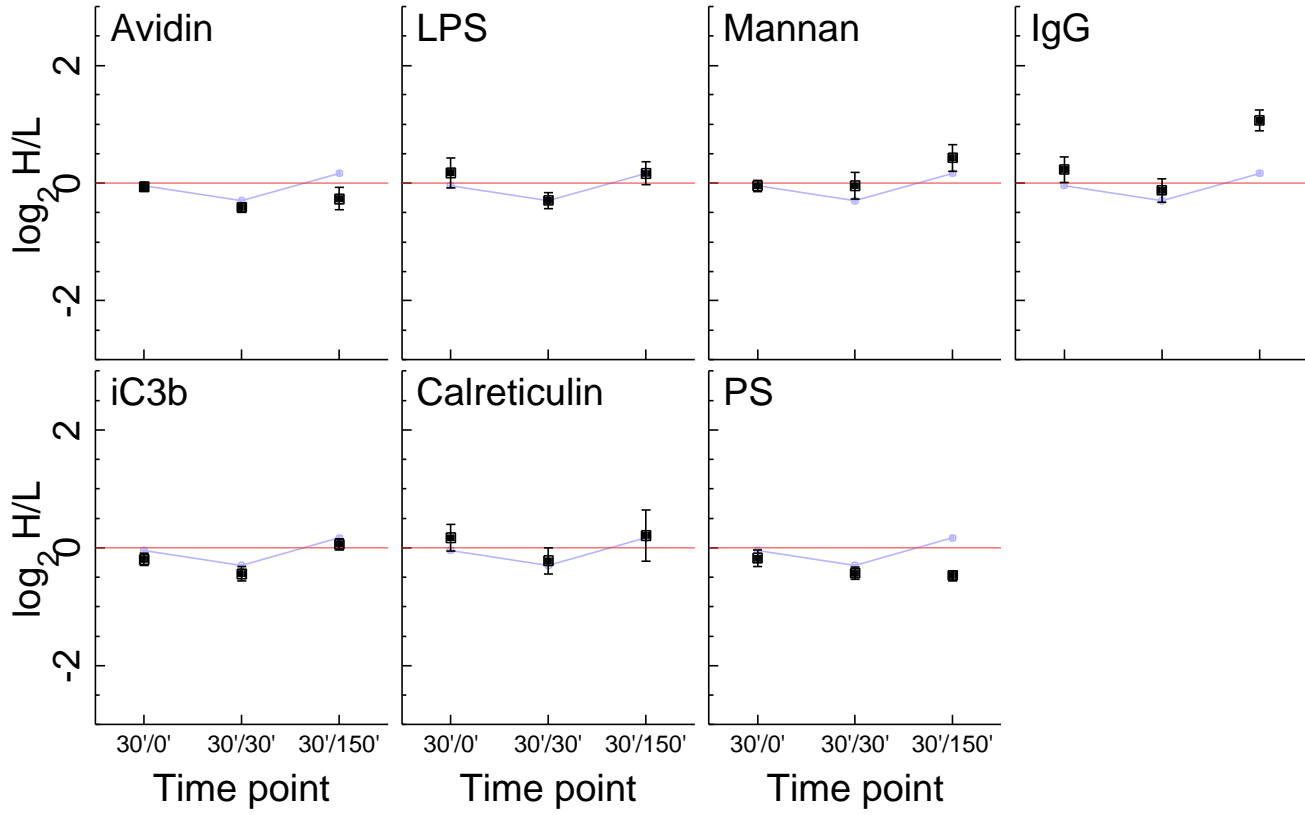

hdac1 (O09106)

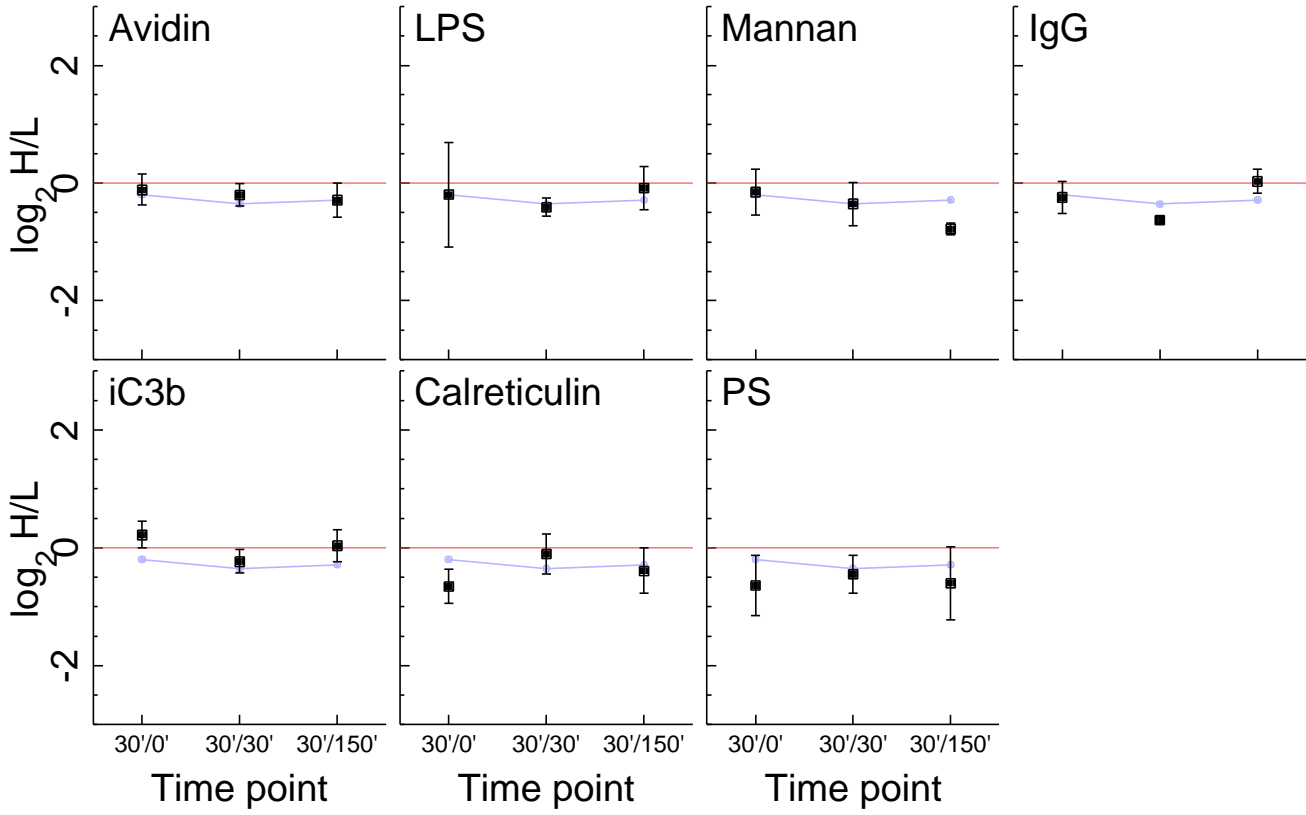

### hdhd2 (D6RI20)

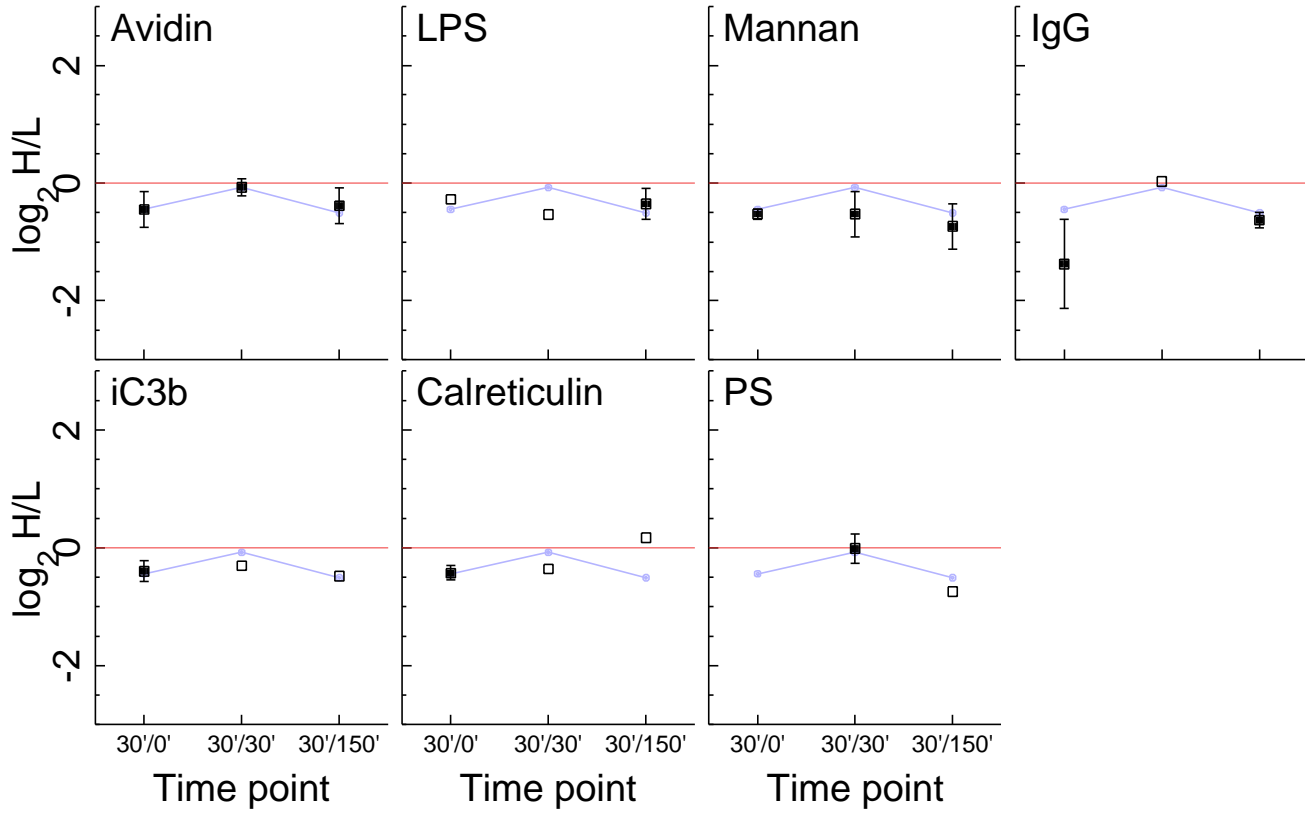

# heatr7a (E0CZ22)

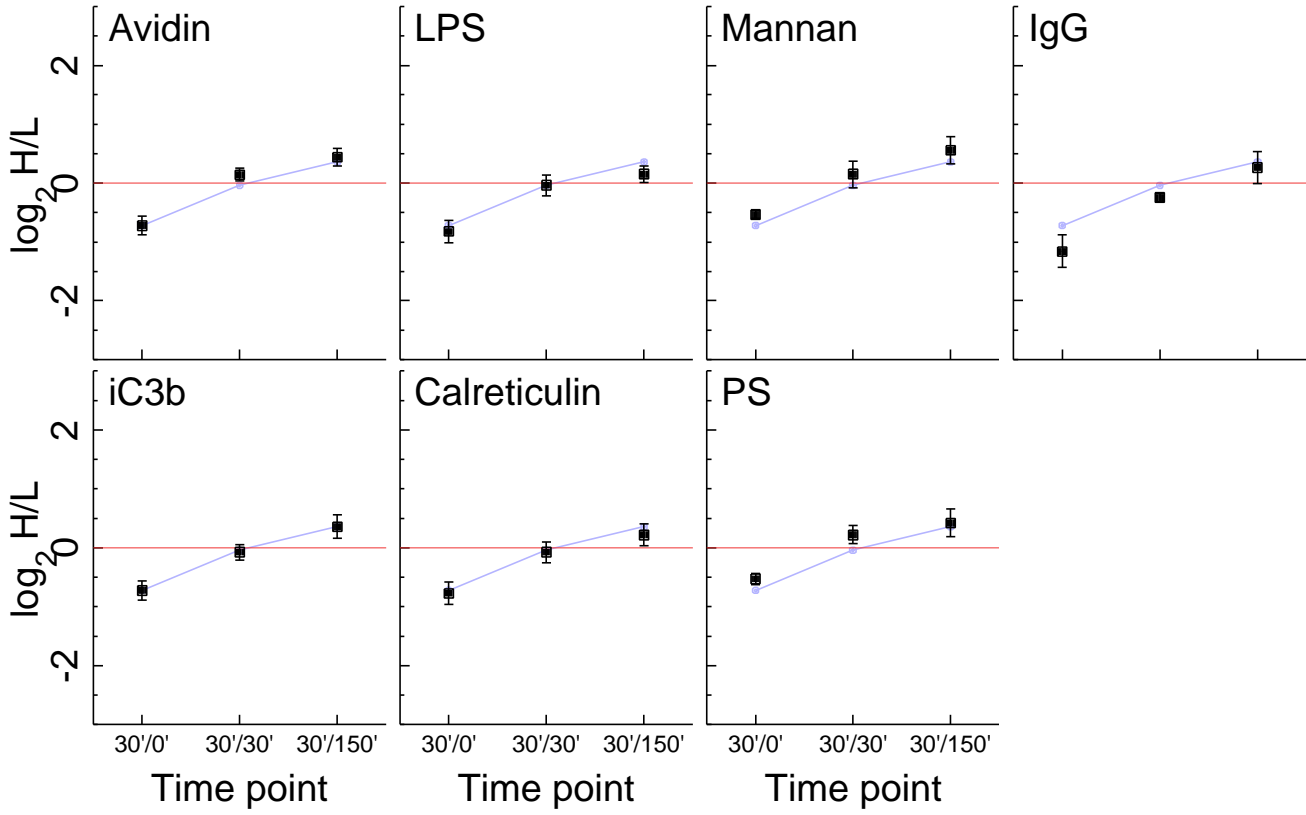



# hexa (P29416)

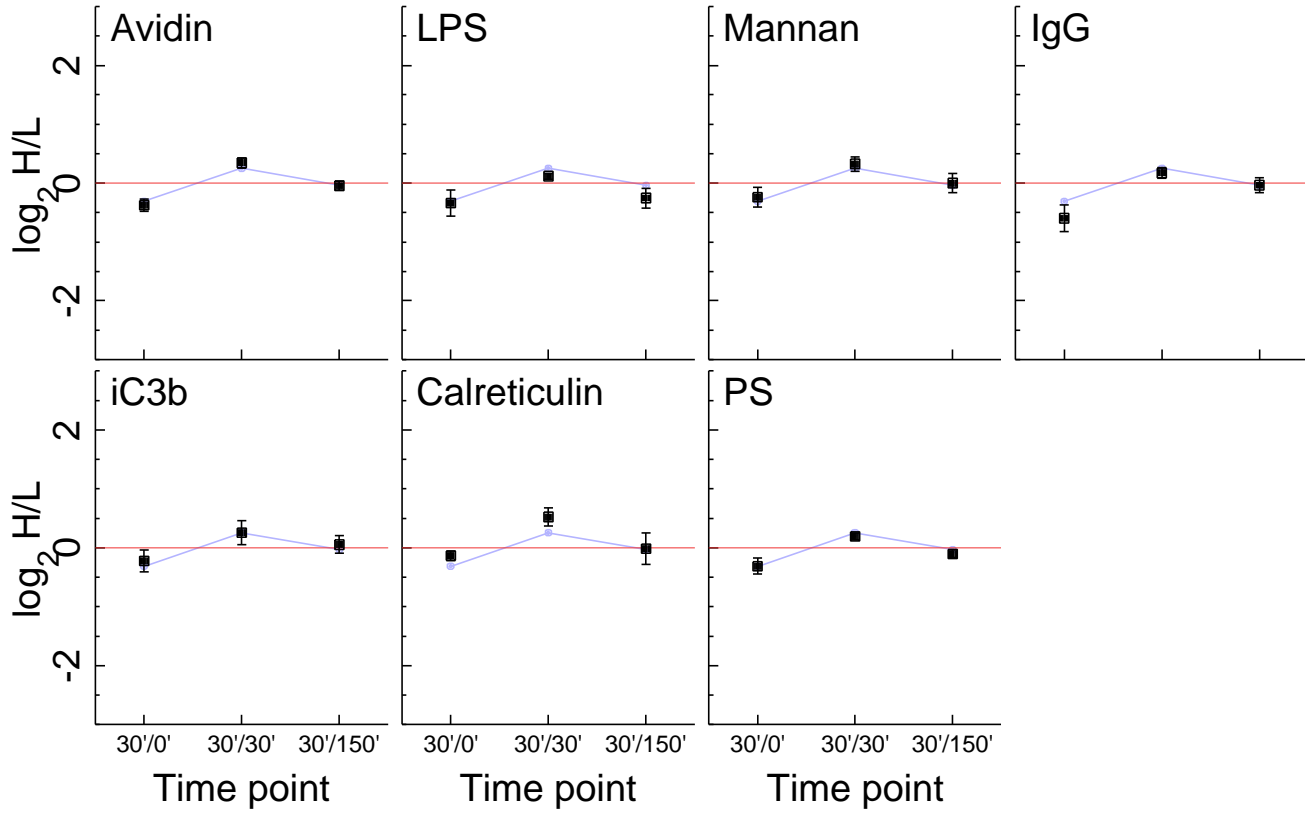

hexb (P20060)

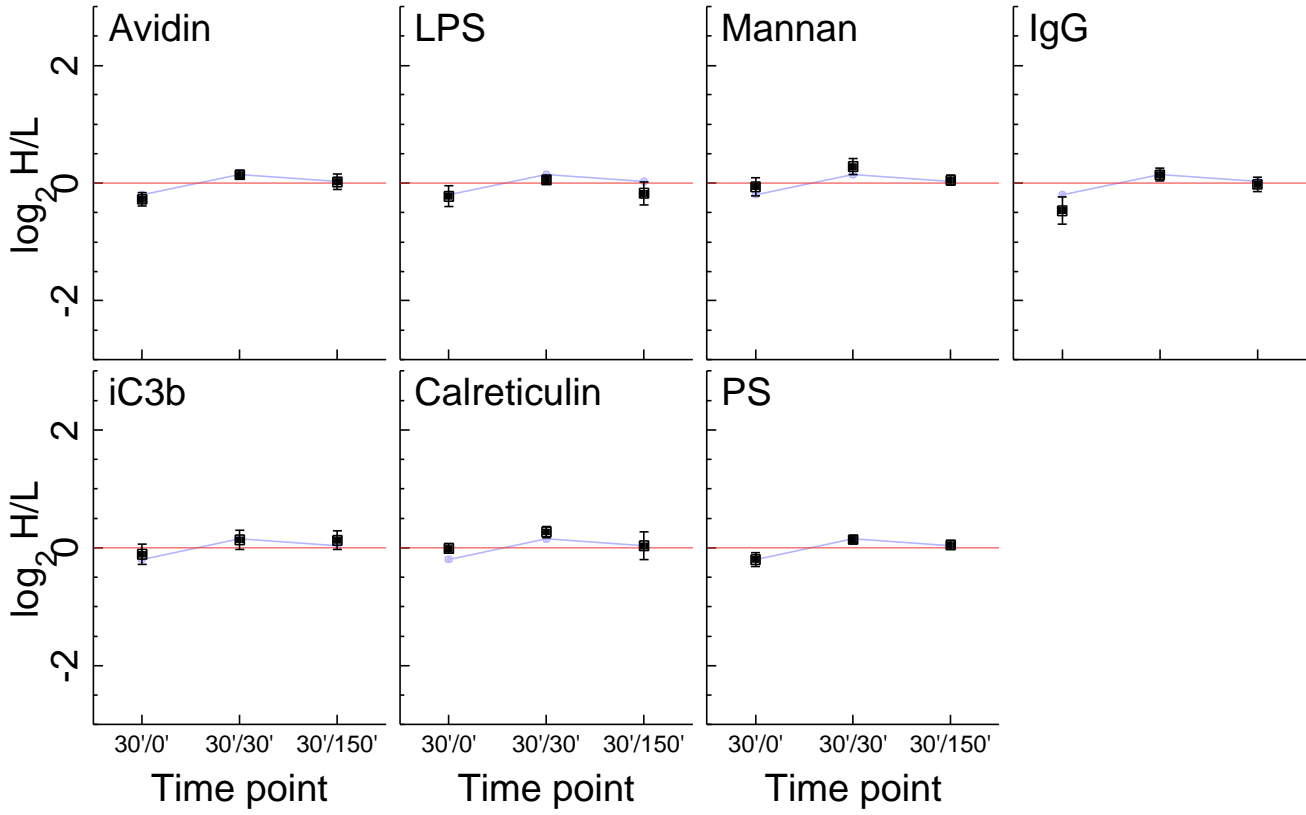

### hfe (P70387)

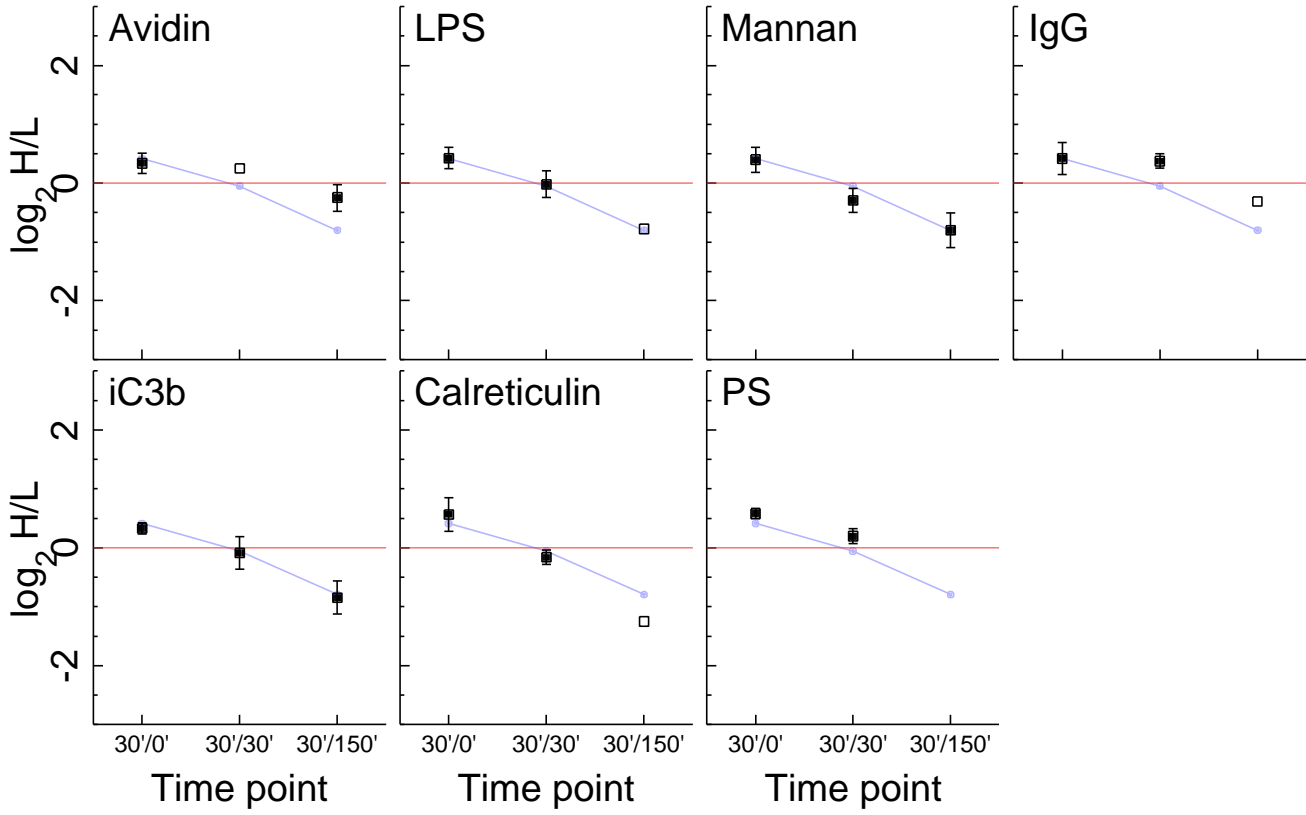

### hgsnat (Q3UDW8)

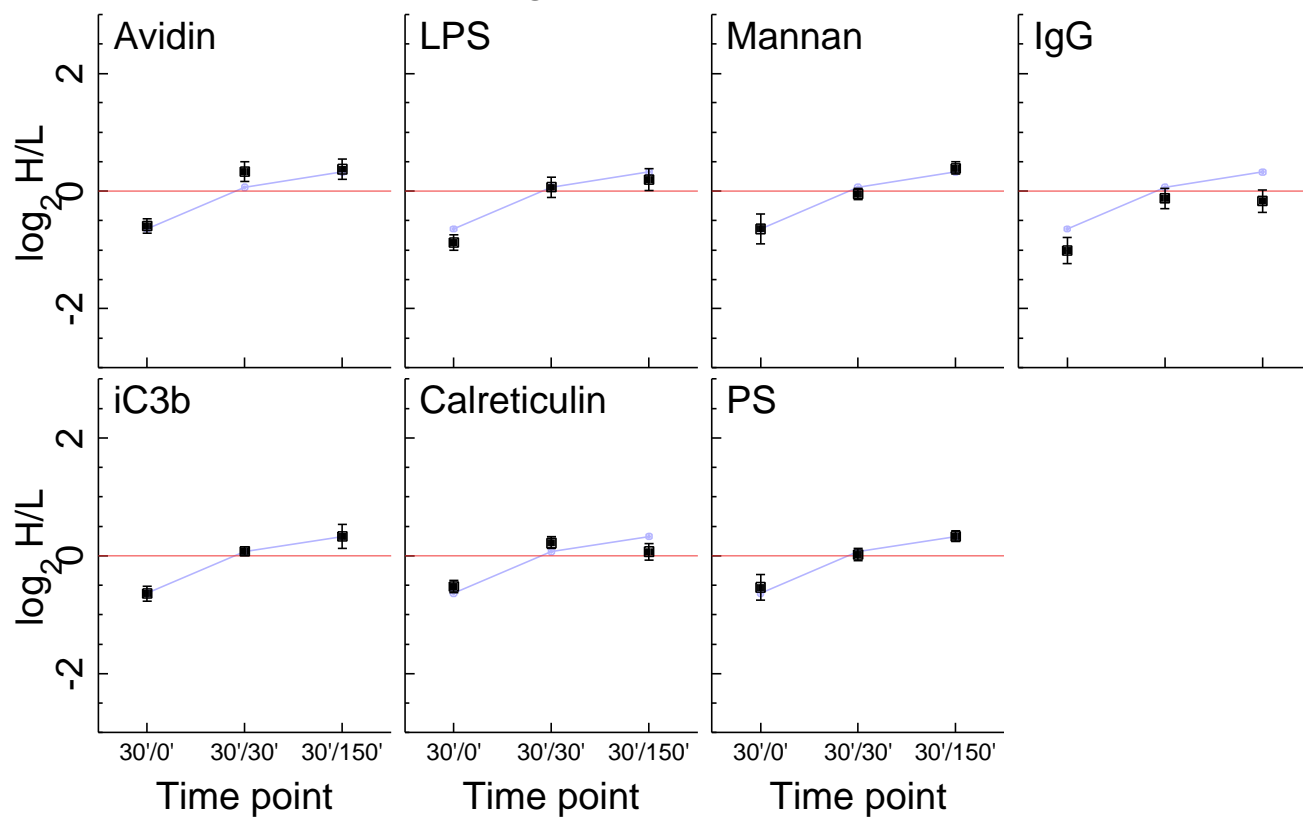

### hgs (Q3UMA3)

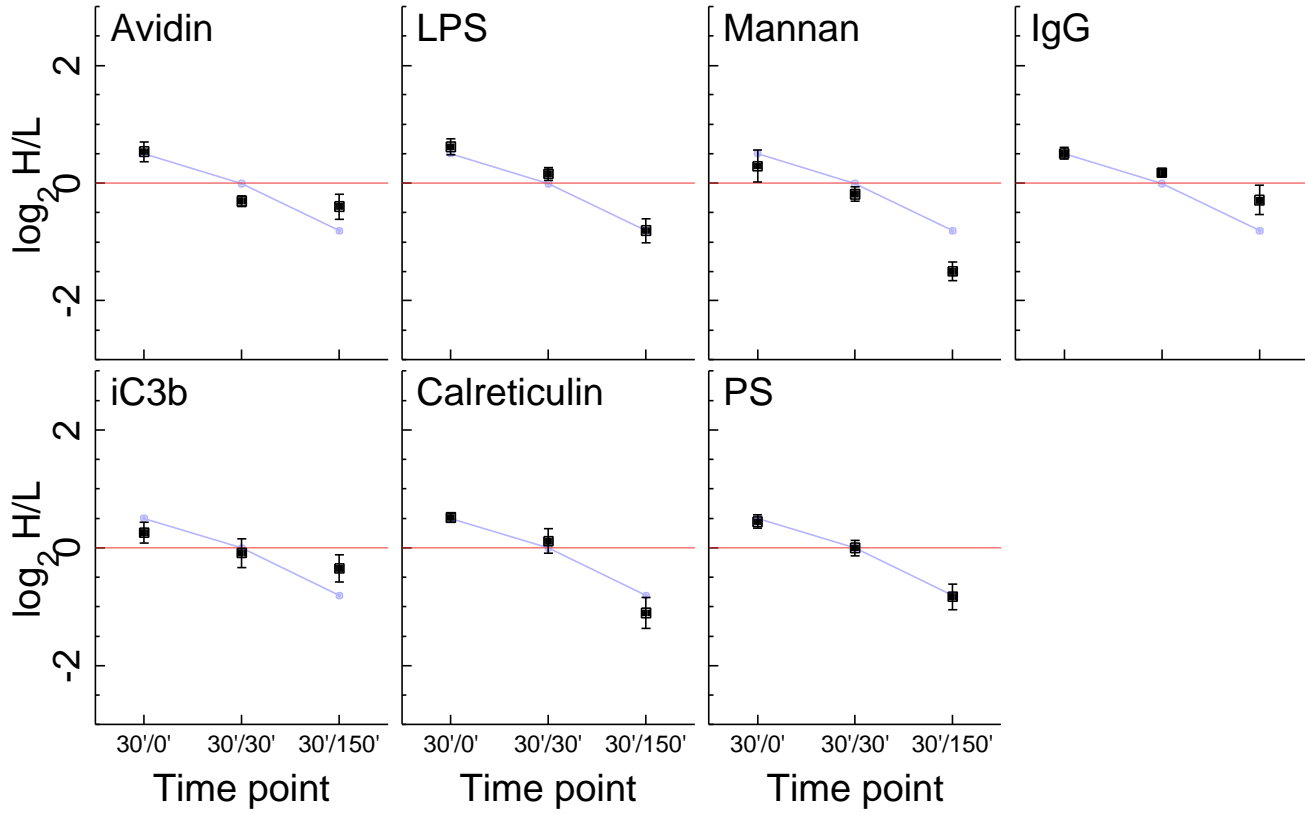

### hint2 (Q9D0S9)

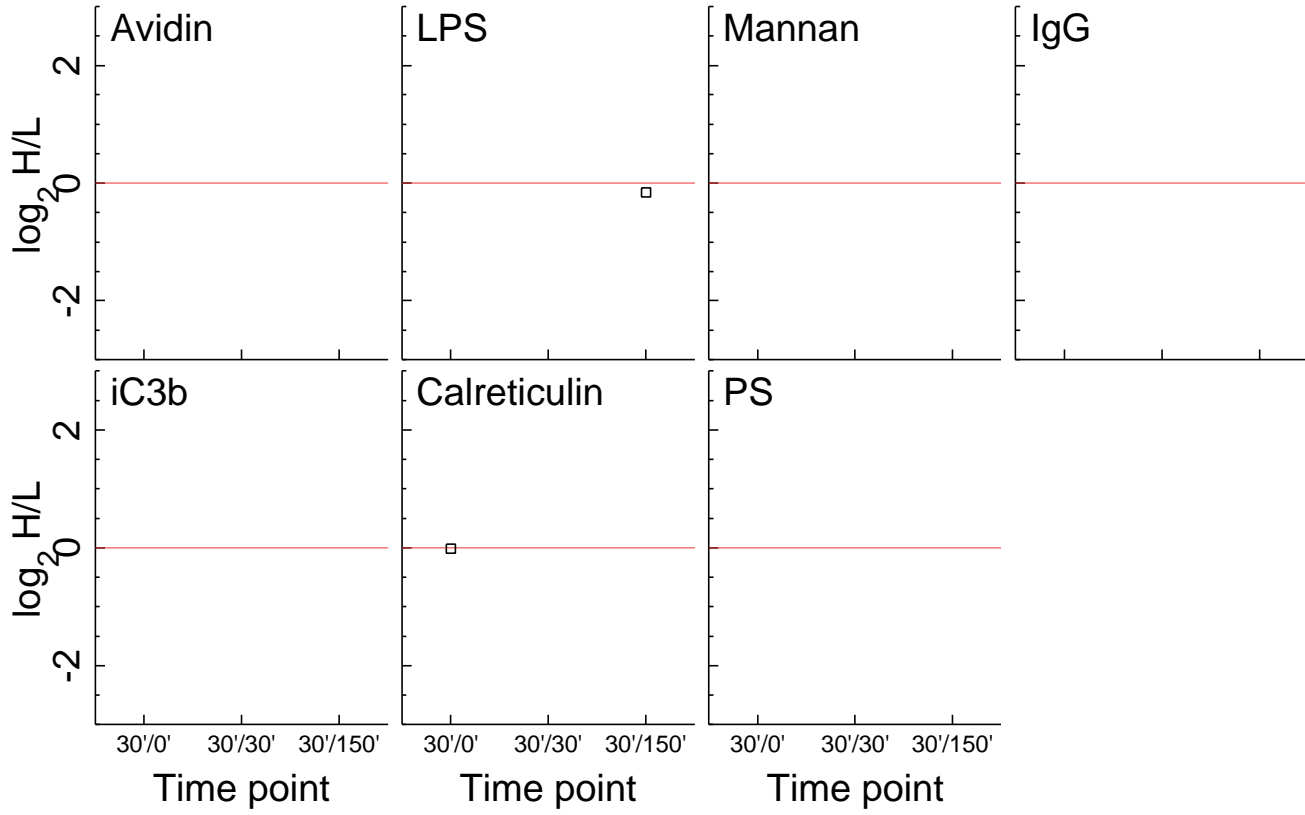

### hist1h1a (P43275)

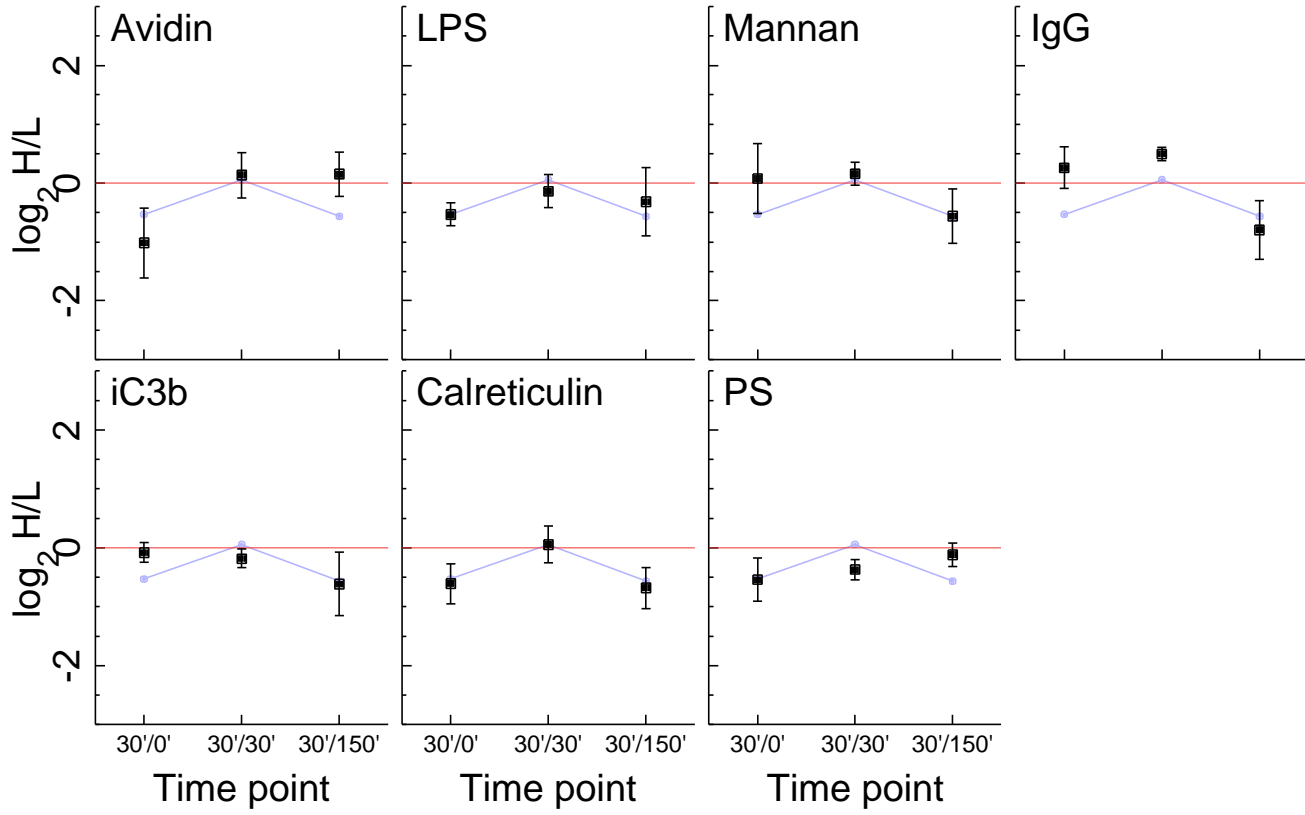

### hist1h1b (P43276)

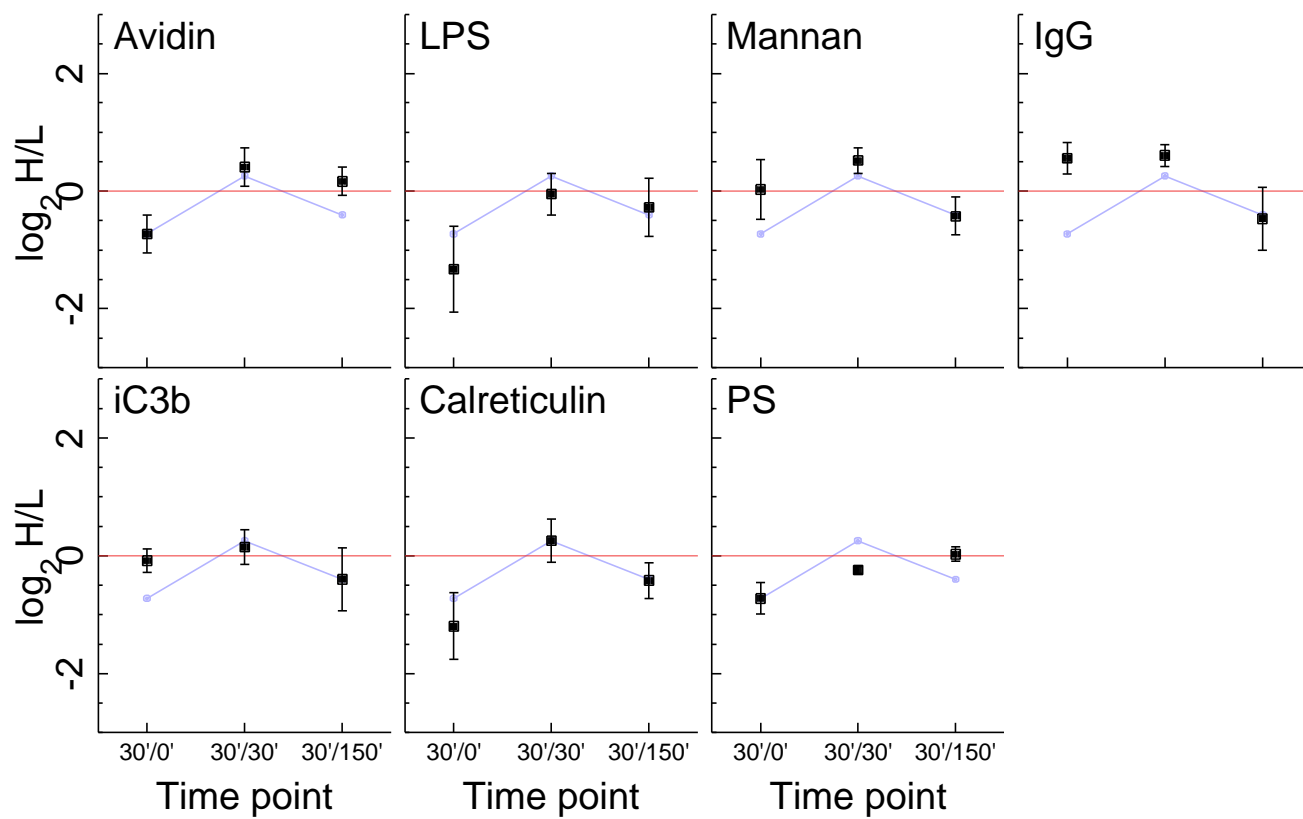



### hist1h1c (P15864)

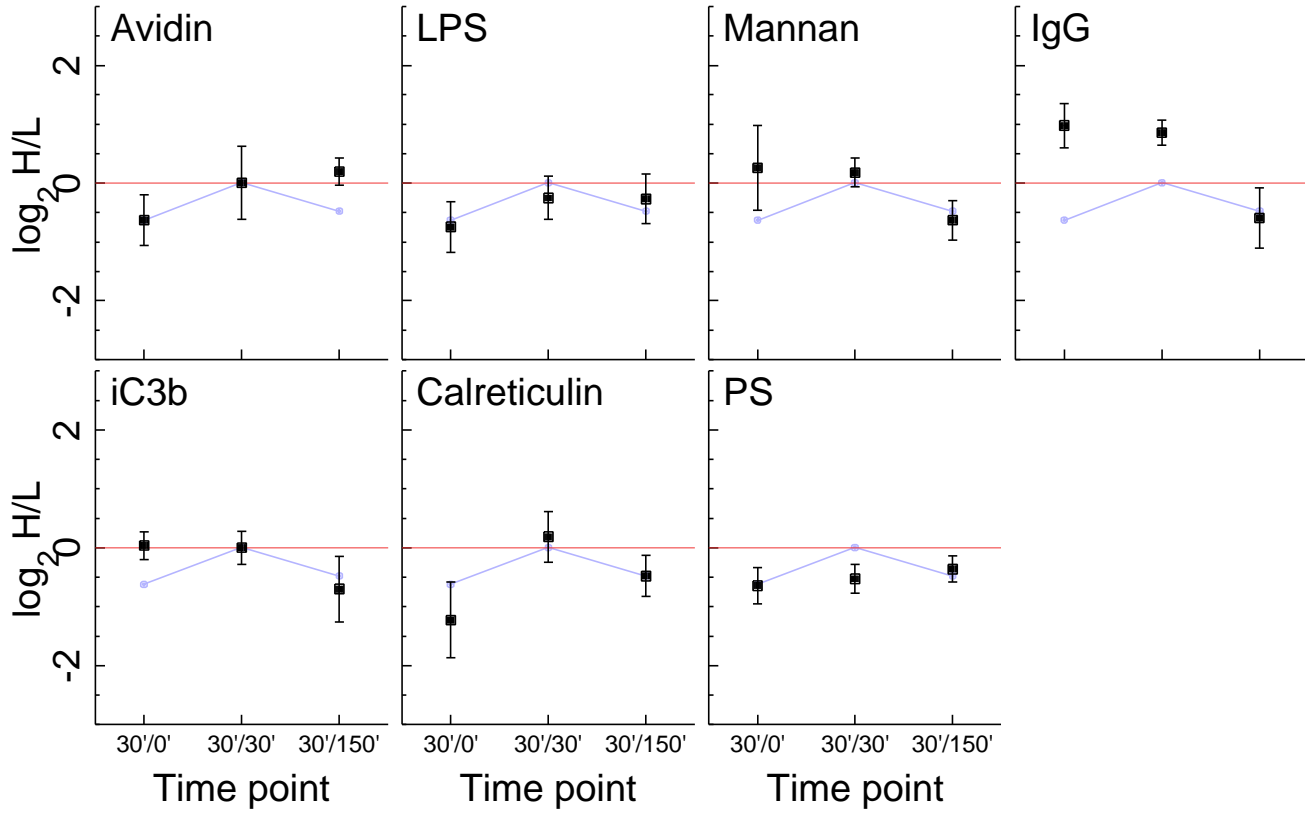

### hist1h1d (P43277)

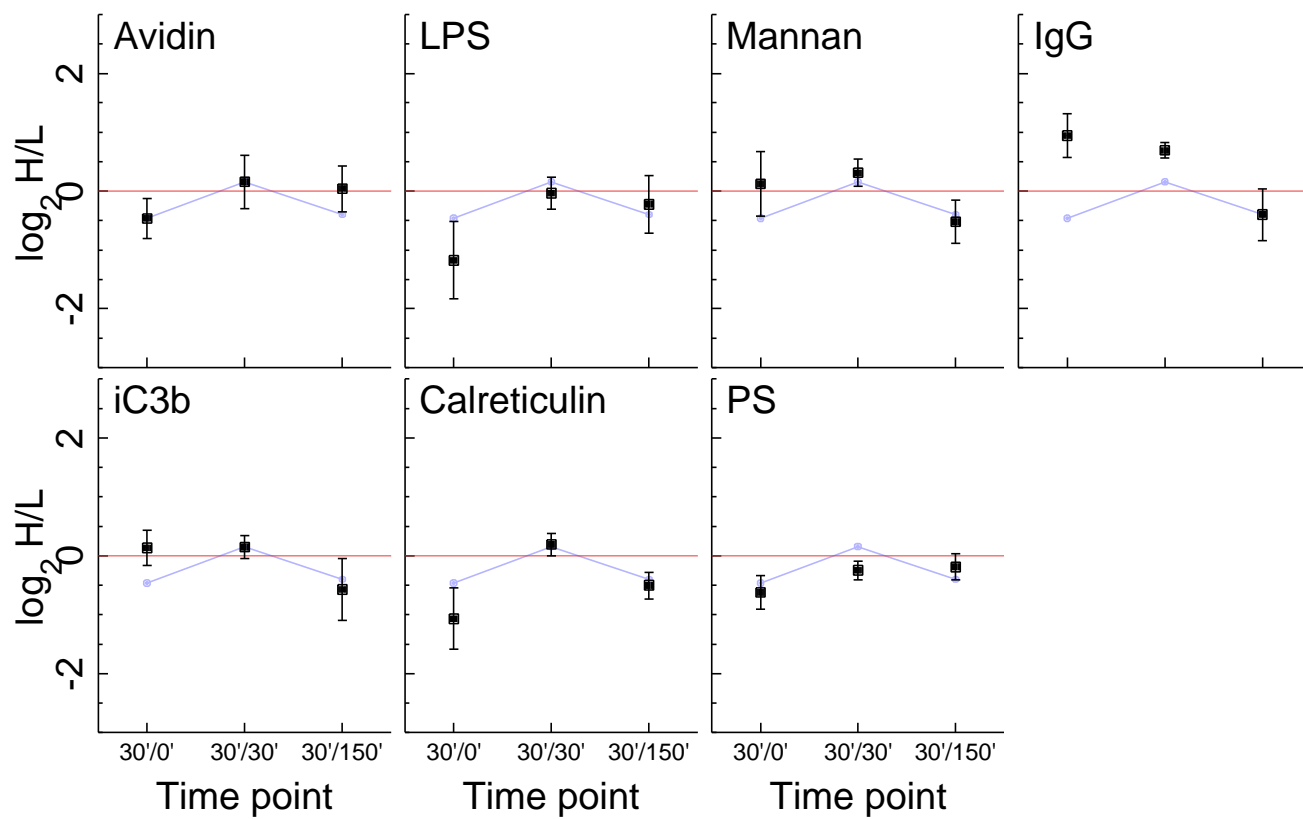

### hist1h1e (P43274)

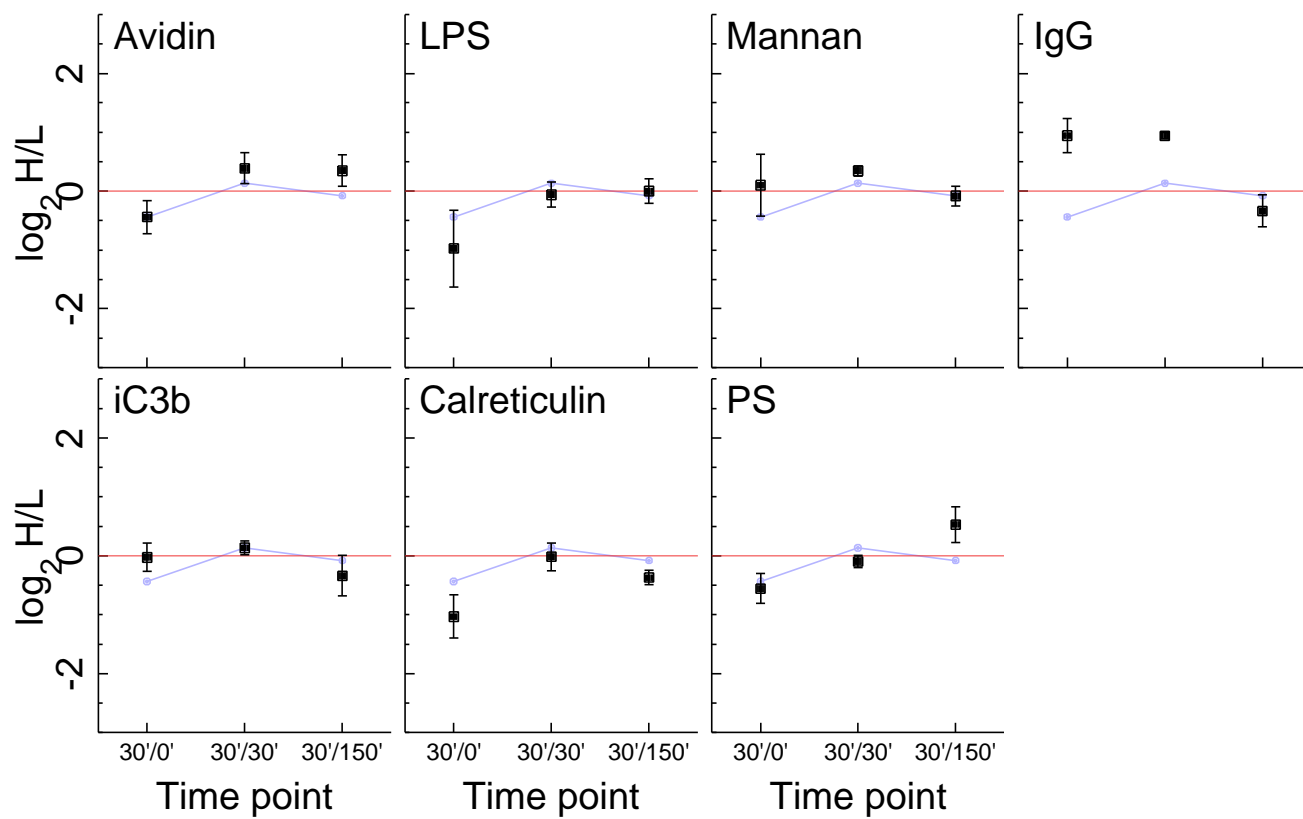

### hist1h2af (Q8CGP5)

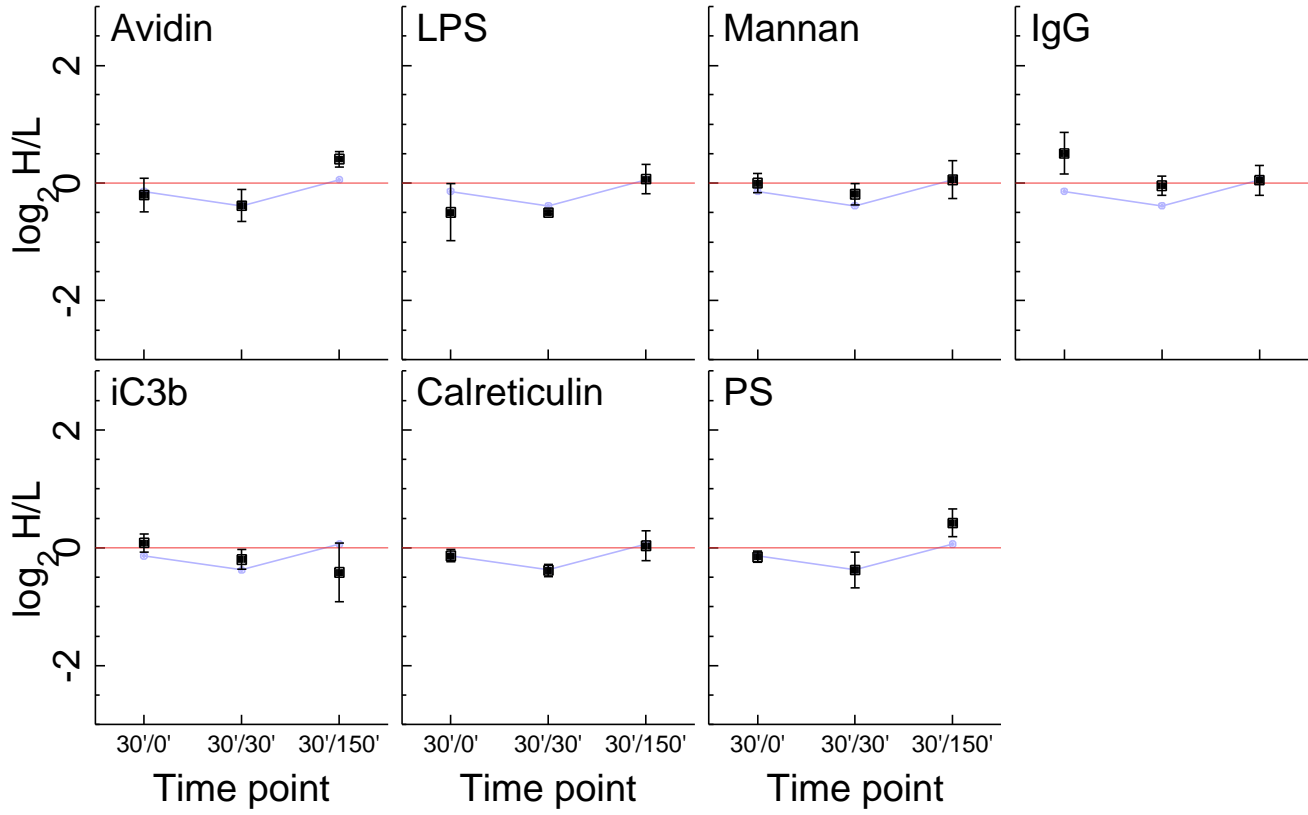

### hist1h3b (P84228)

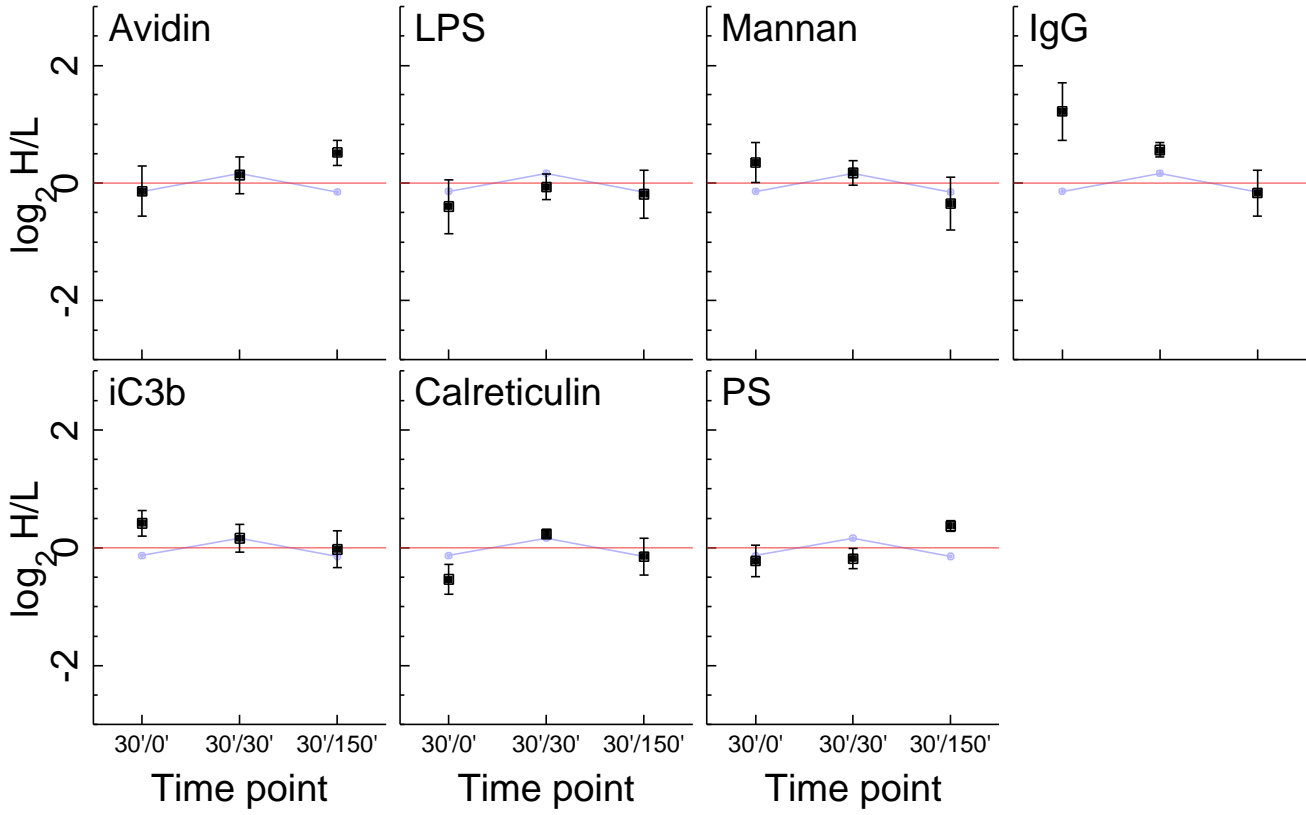

### hist1h4a (P62806)

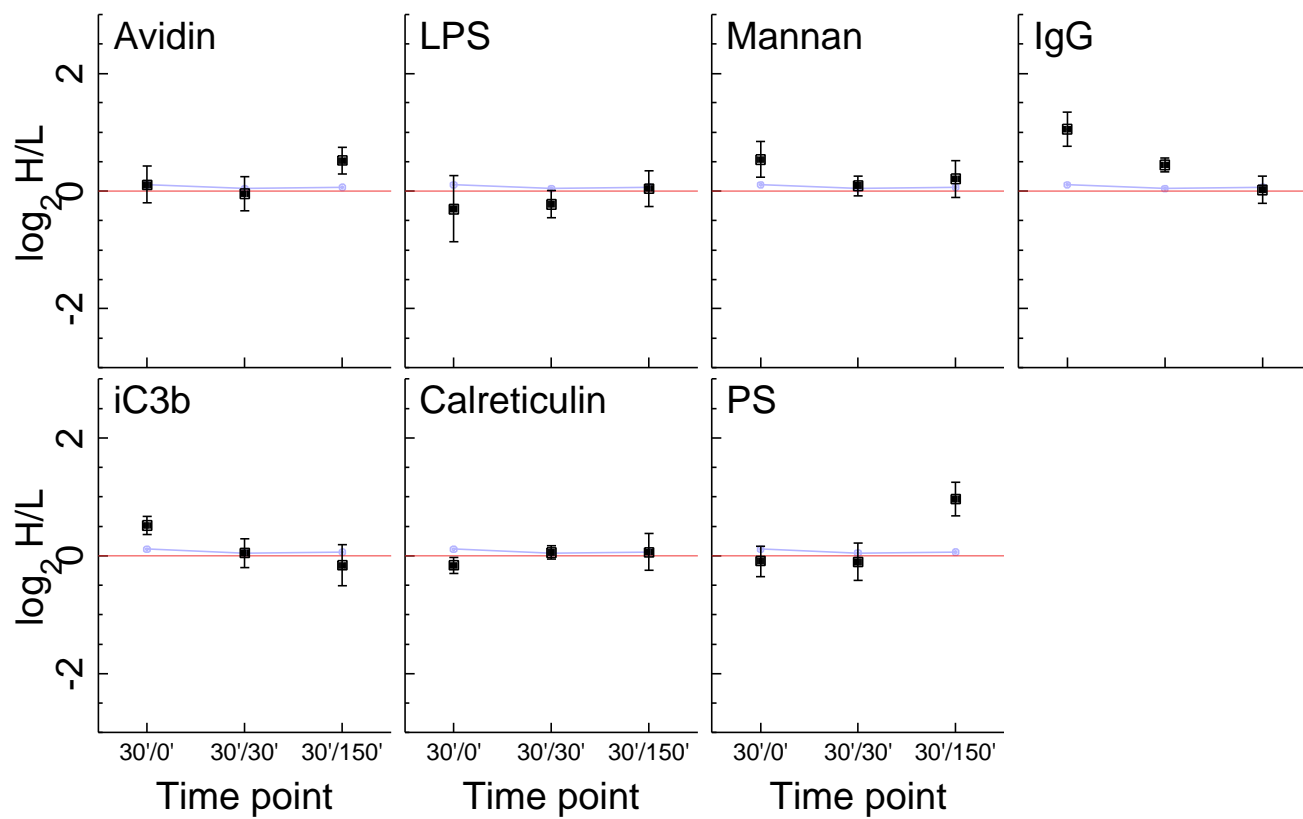

### hist2h2aa1 (Q6GSS7)

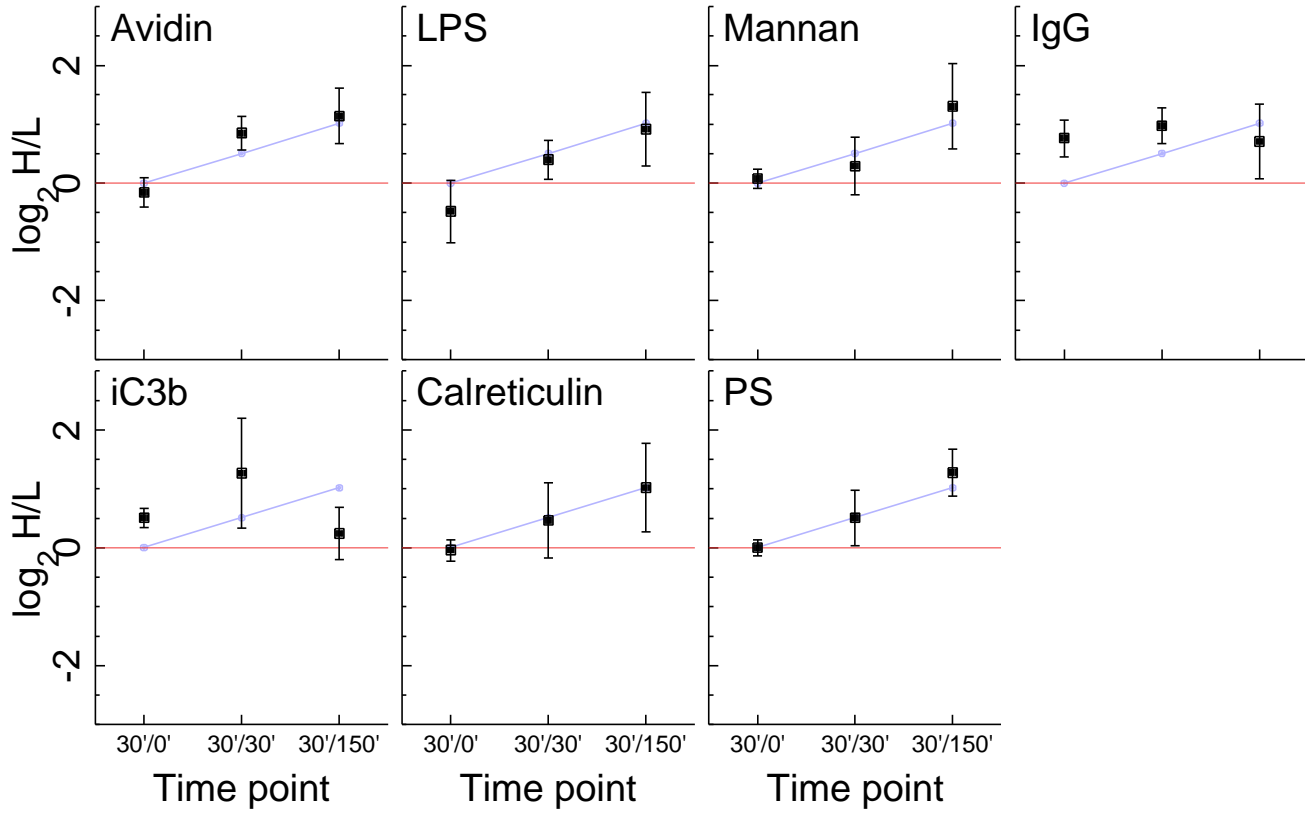

### hist3h2bb (Q8CGP0)

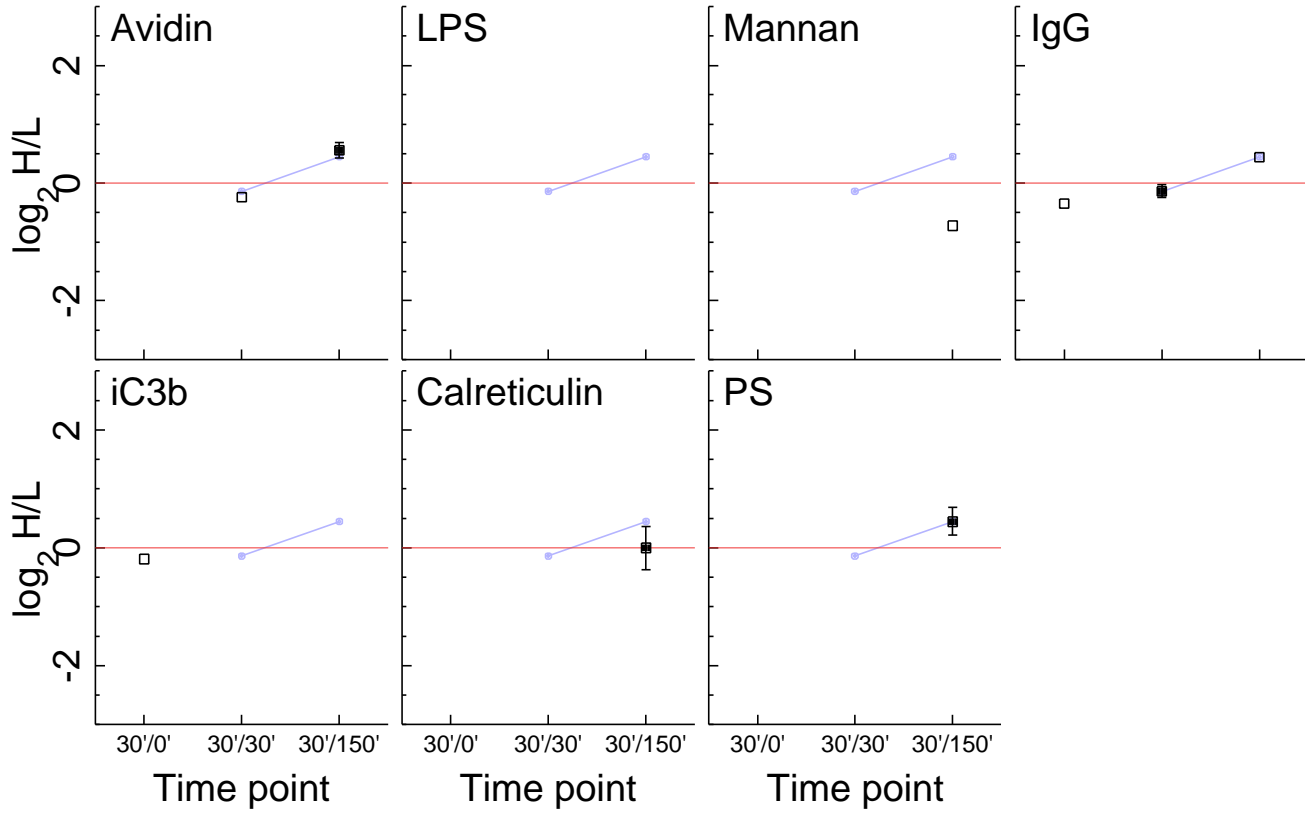



### hk1 (P17710)

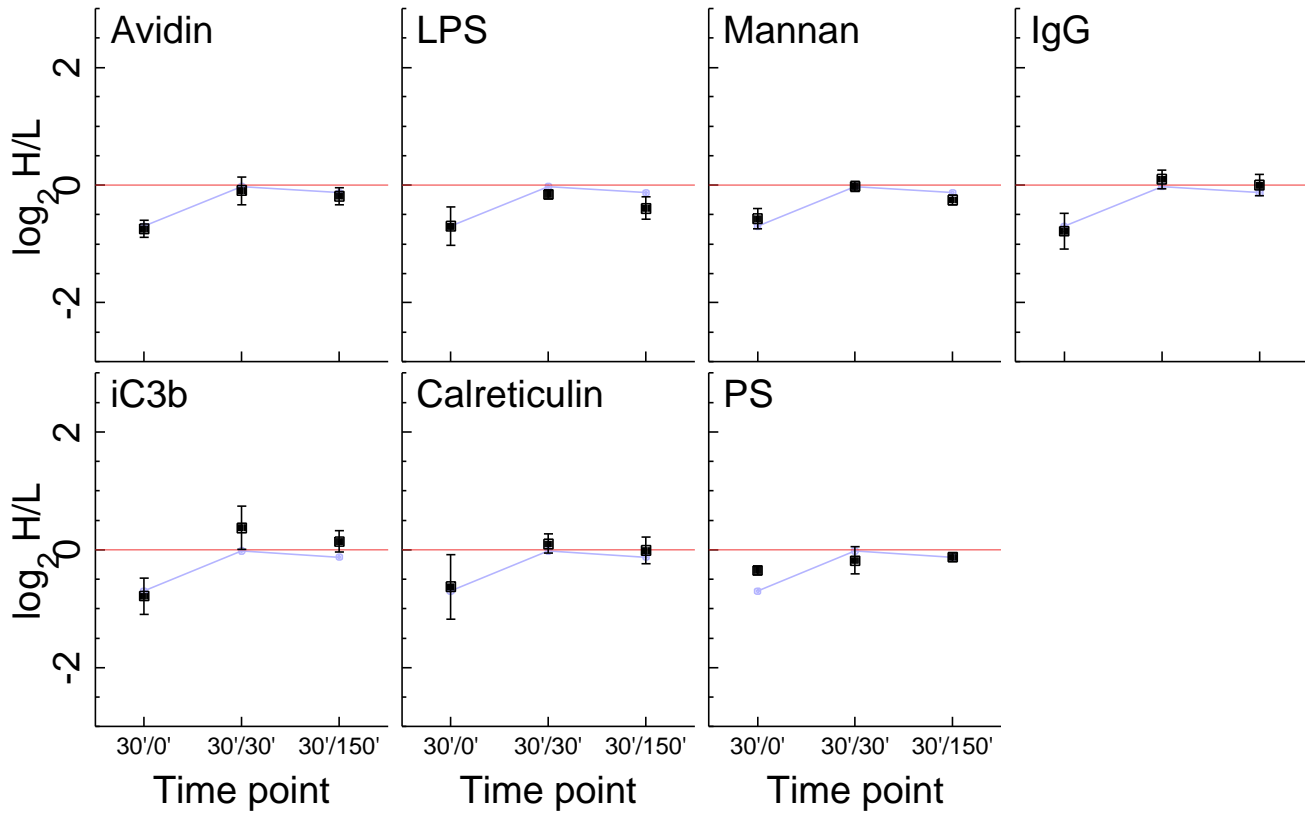

### hk2 (O08528)

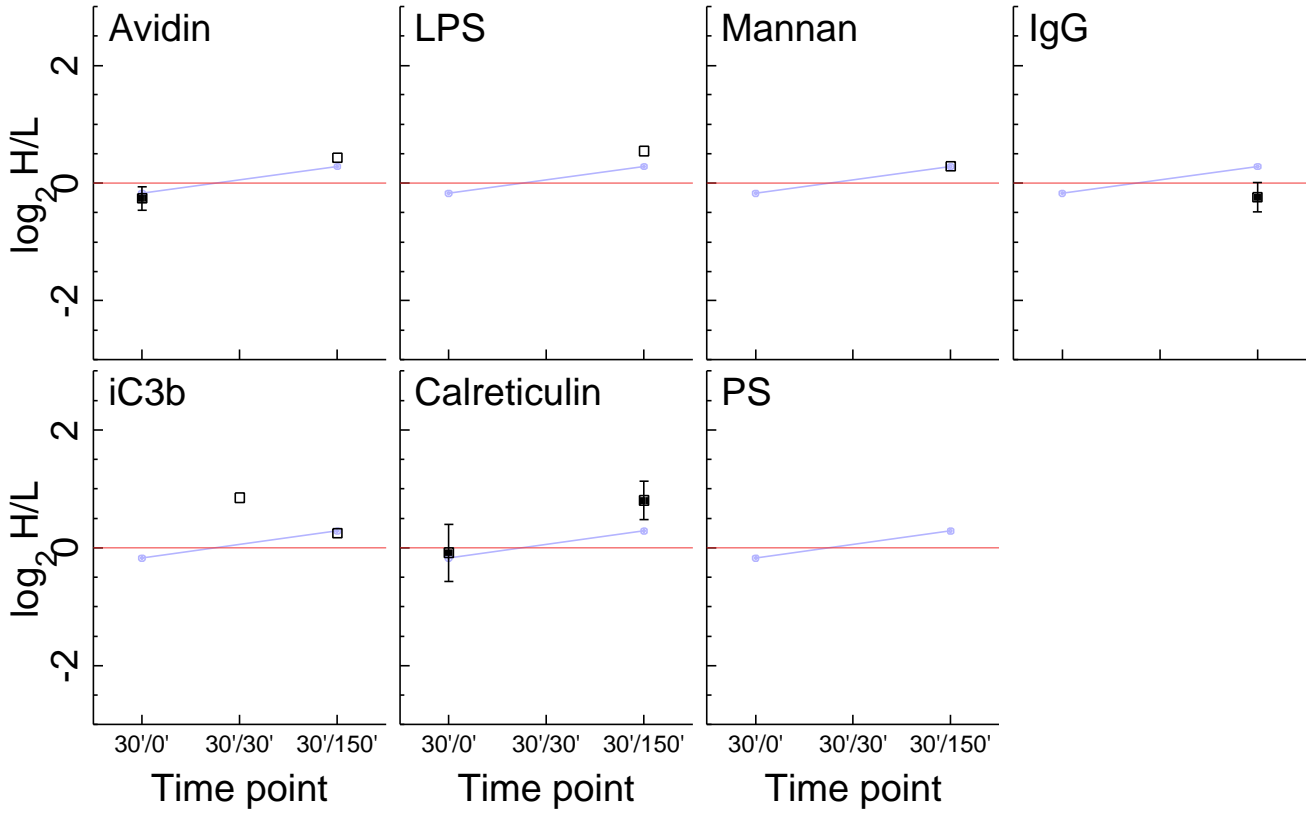

### hm13 (Q9D8V0)

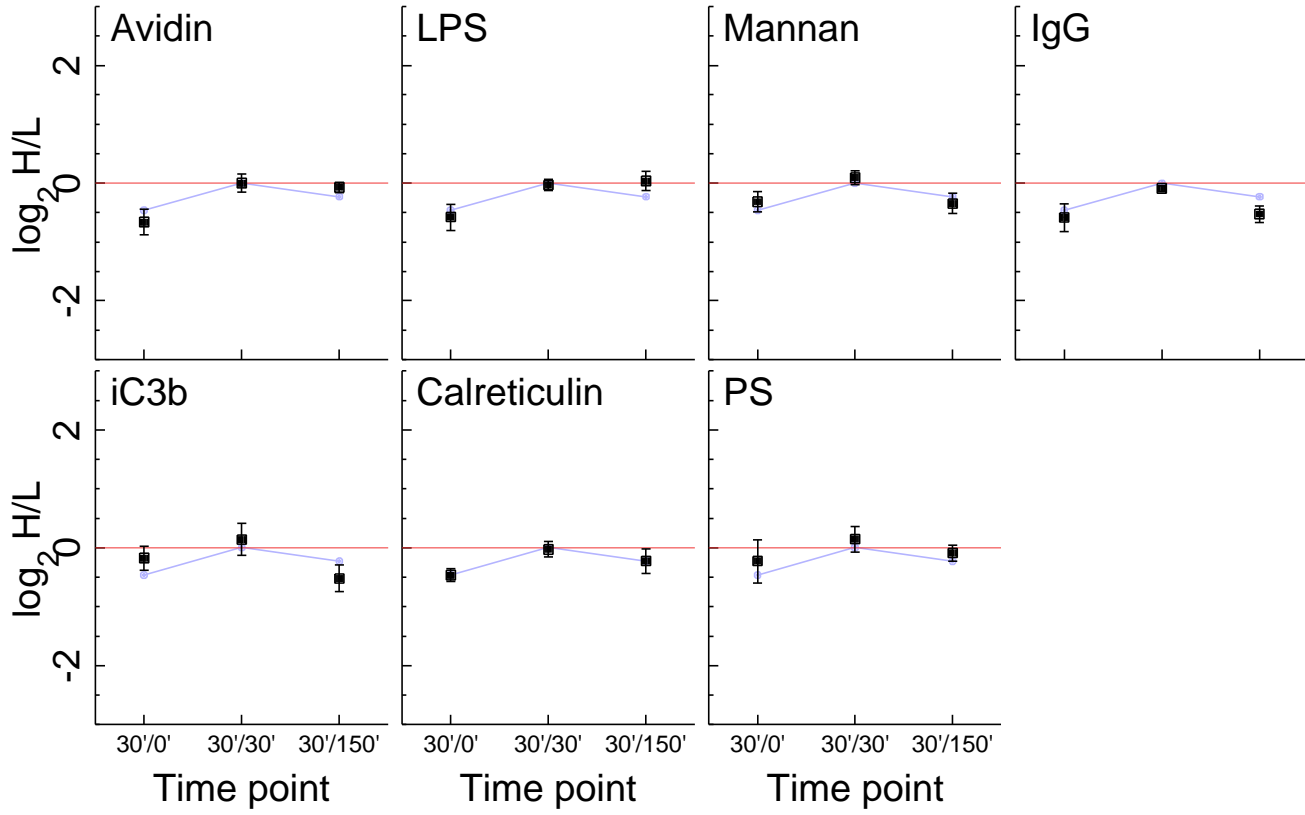

hmga1 (P17095)

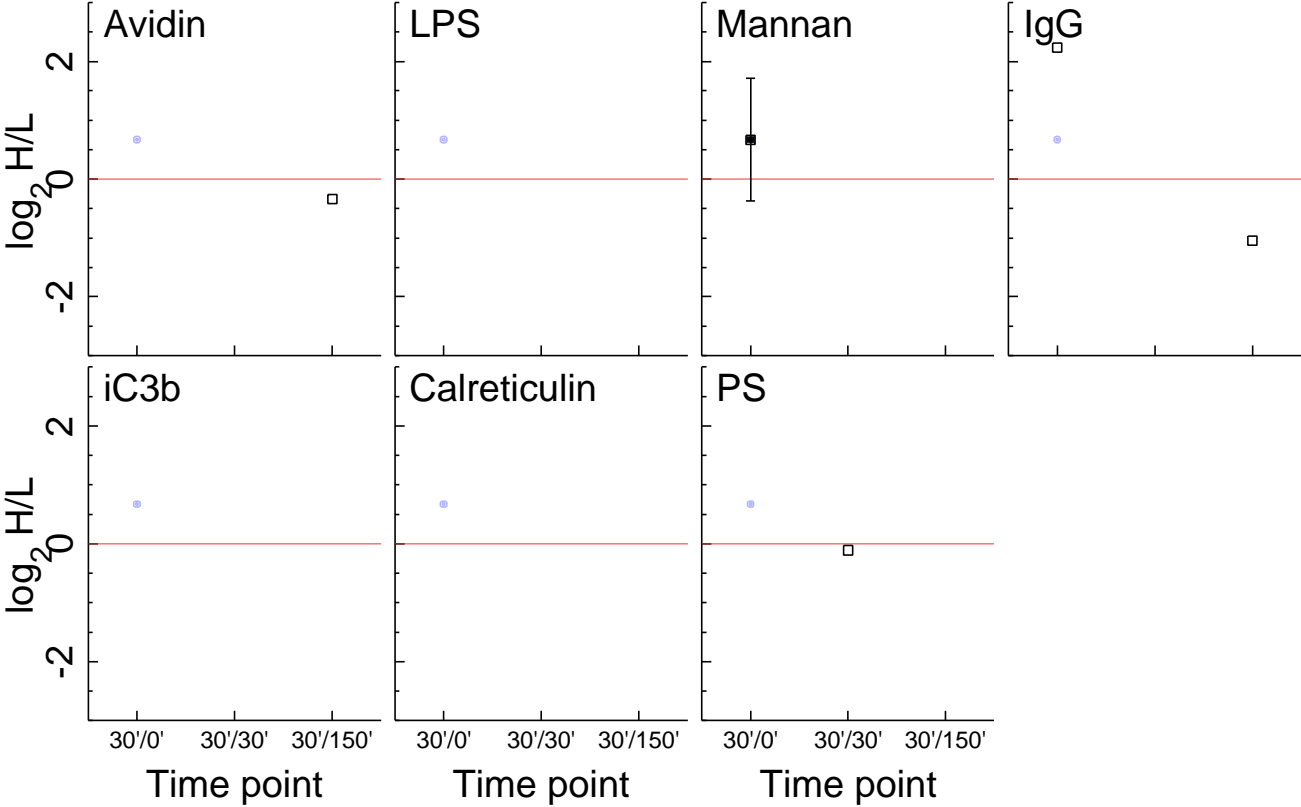

### hmga2 (Q6NSP9)

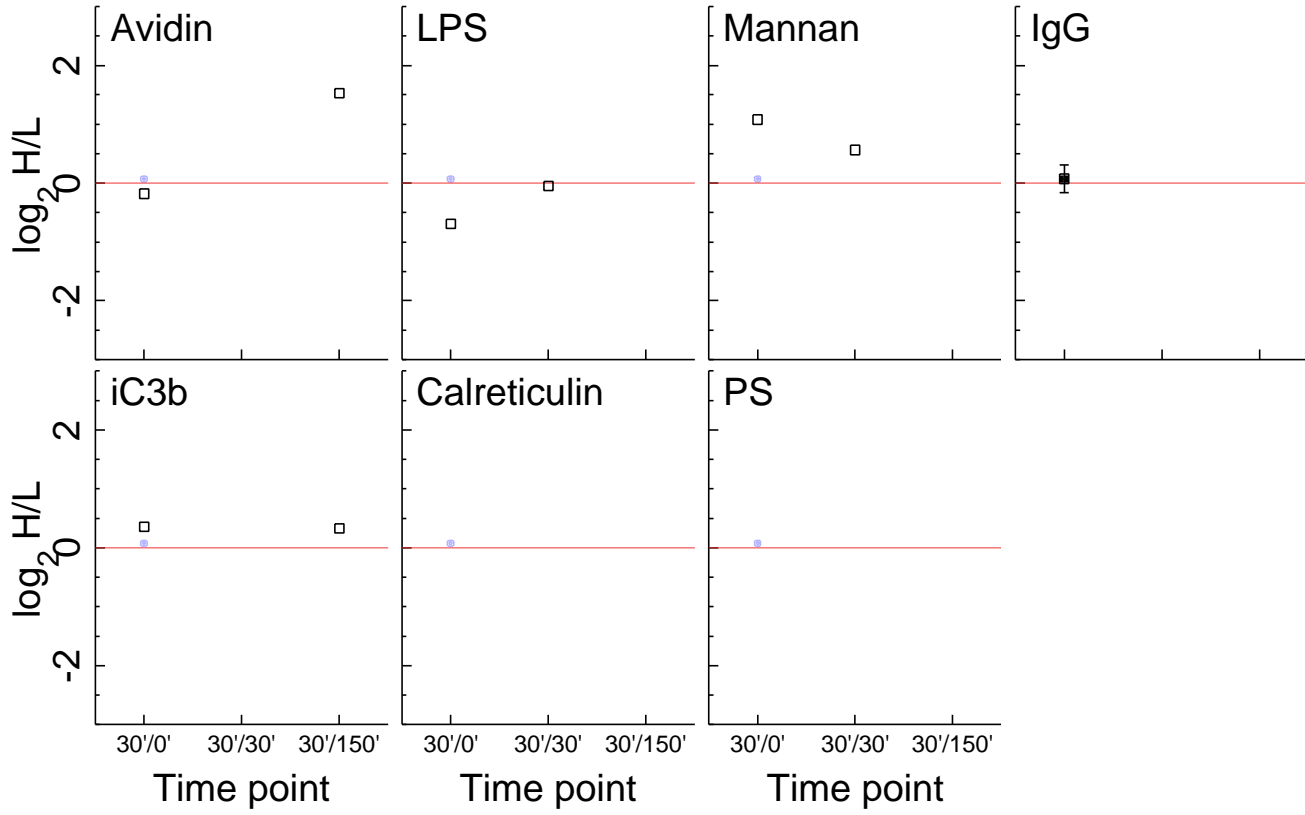

hmgb1 (P63158)

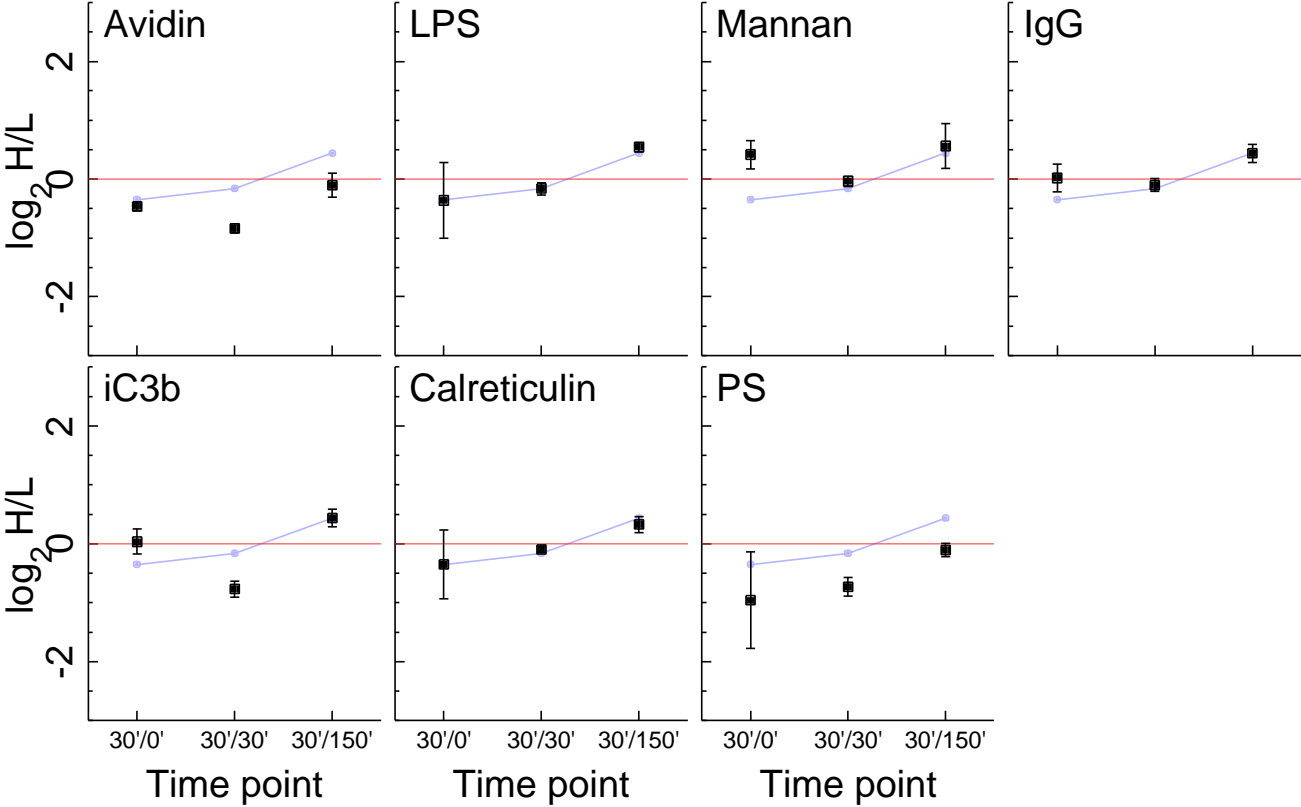

### hmgb2 (P30681)

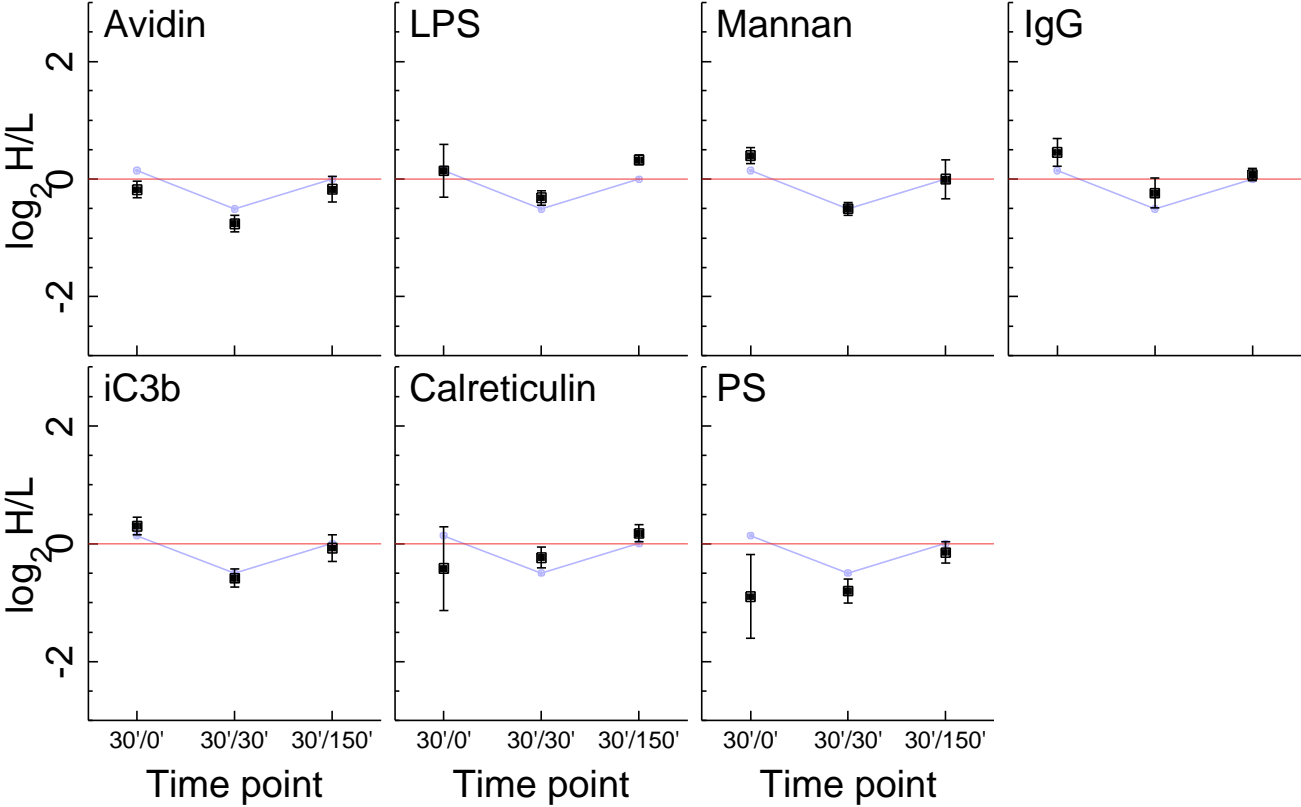

### hmgcl (P38060)

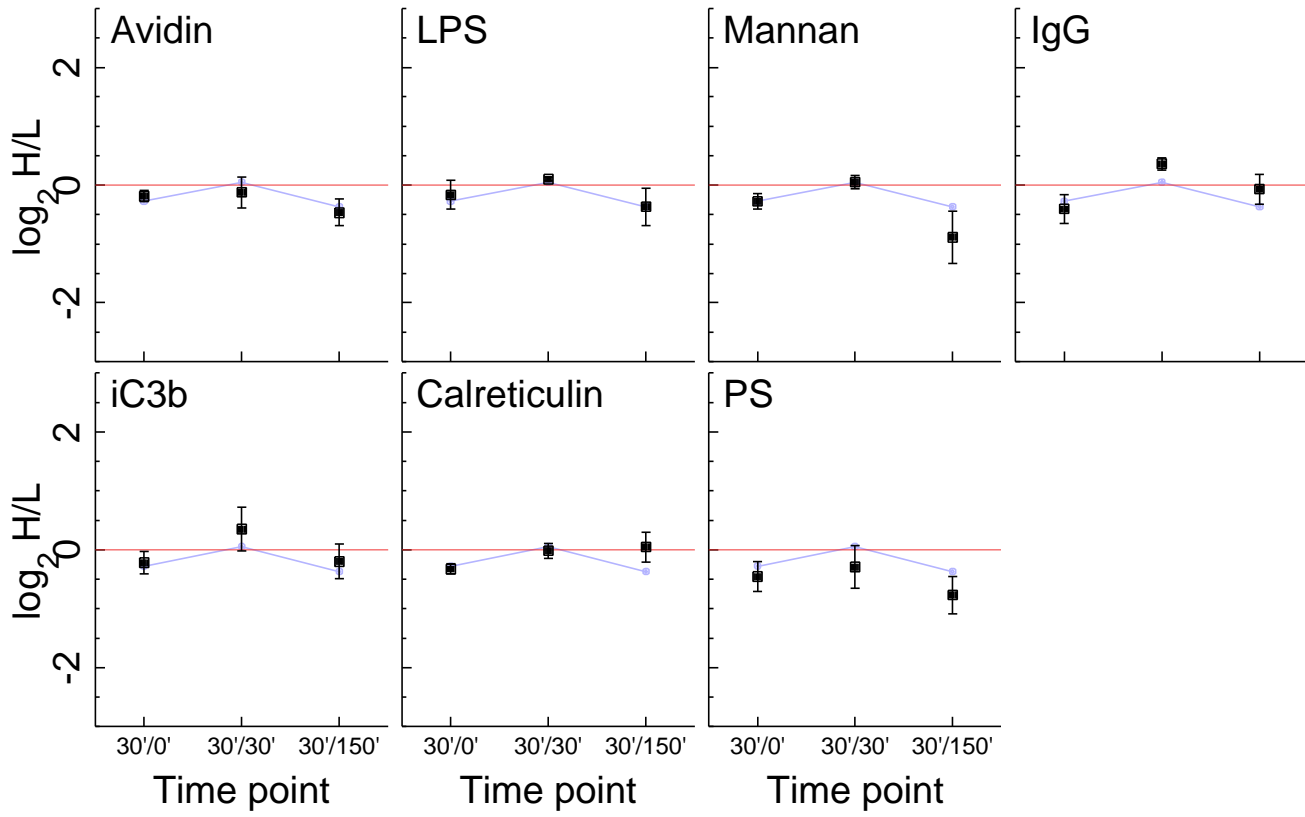



### hmgn2 (A3KGL9)

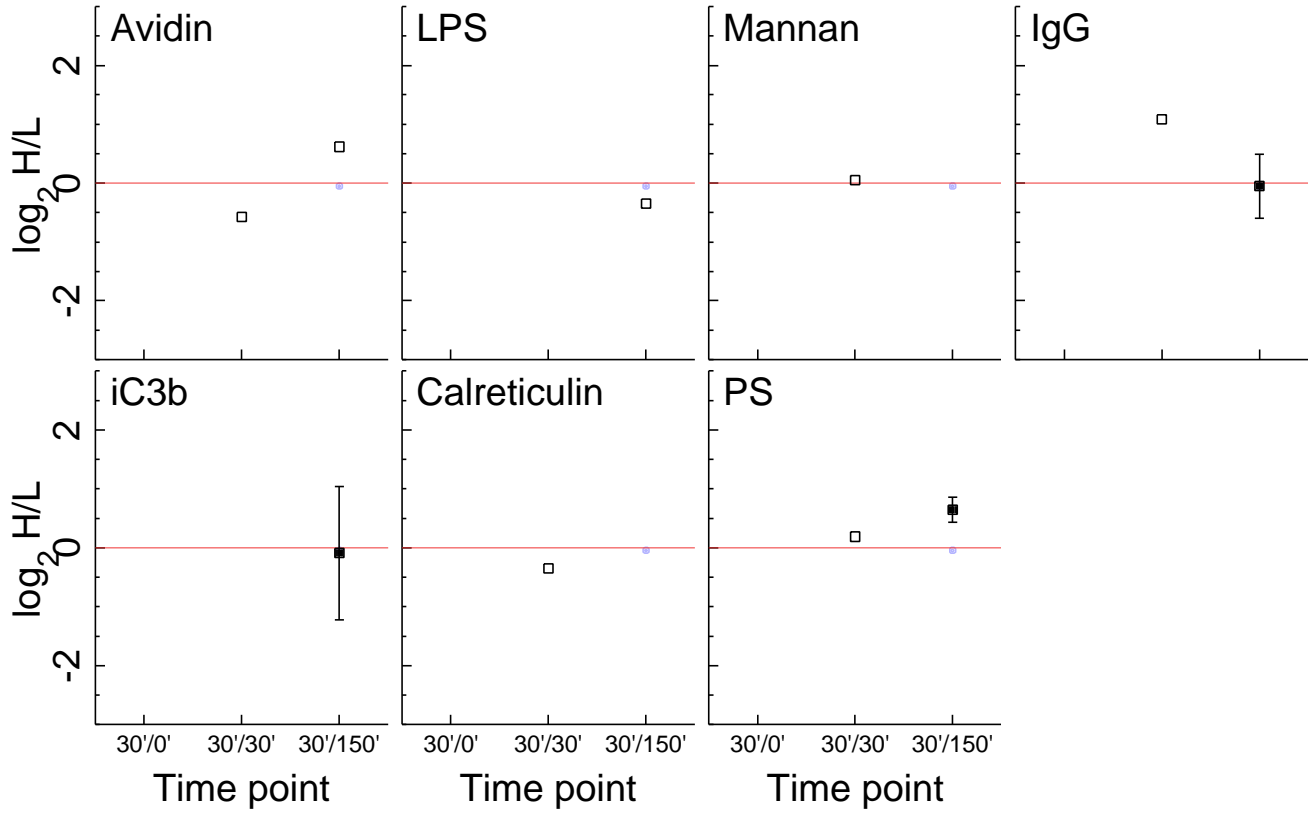

### hmha1 (G3X9Q3)

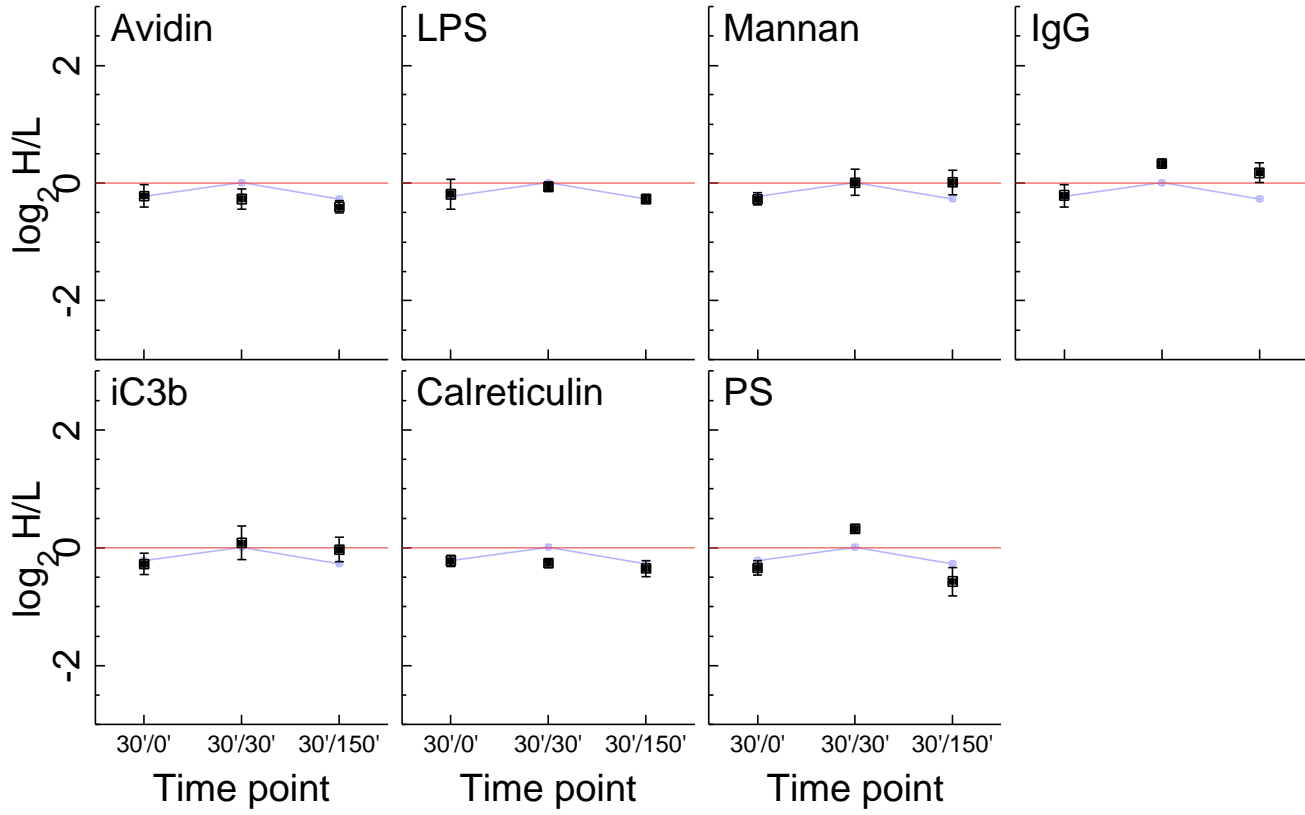

### hmox1 (P14901)

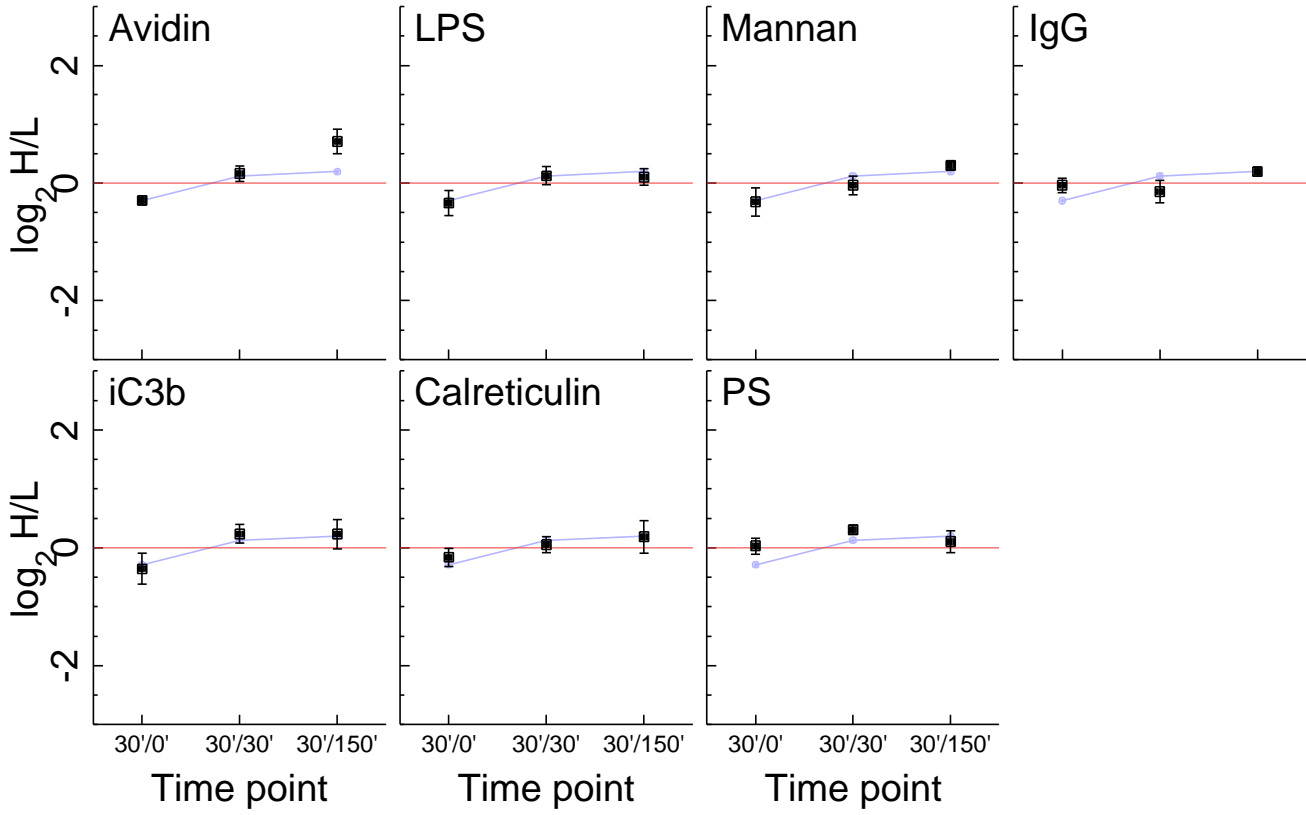

hmo2 (O70252)

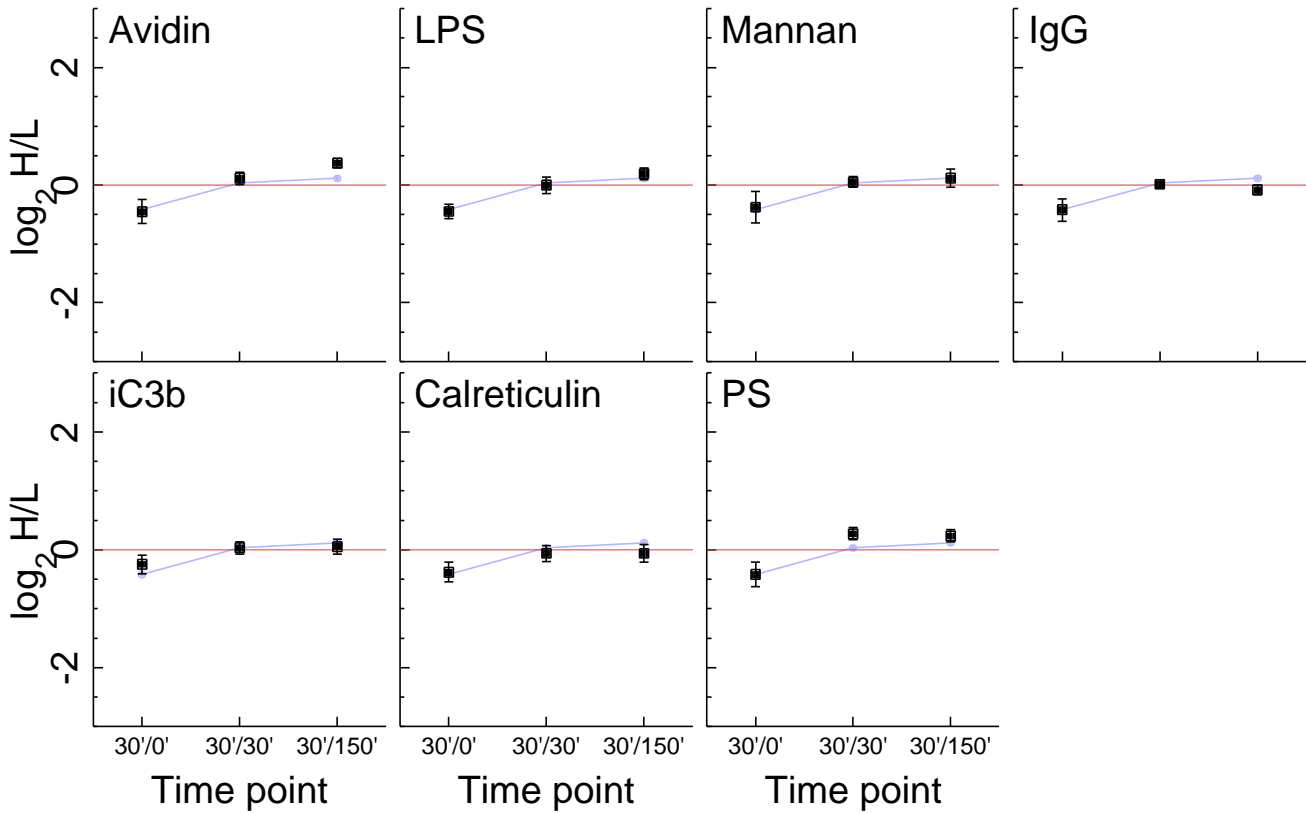

### hn1I (Q6PGH2)

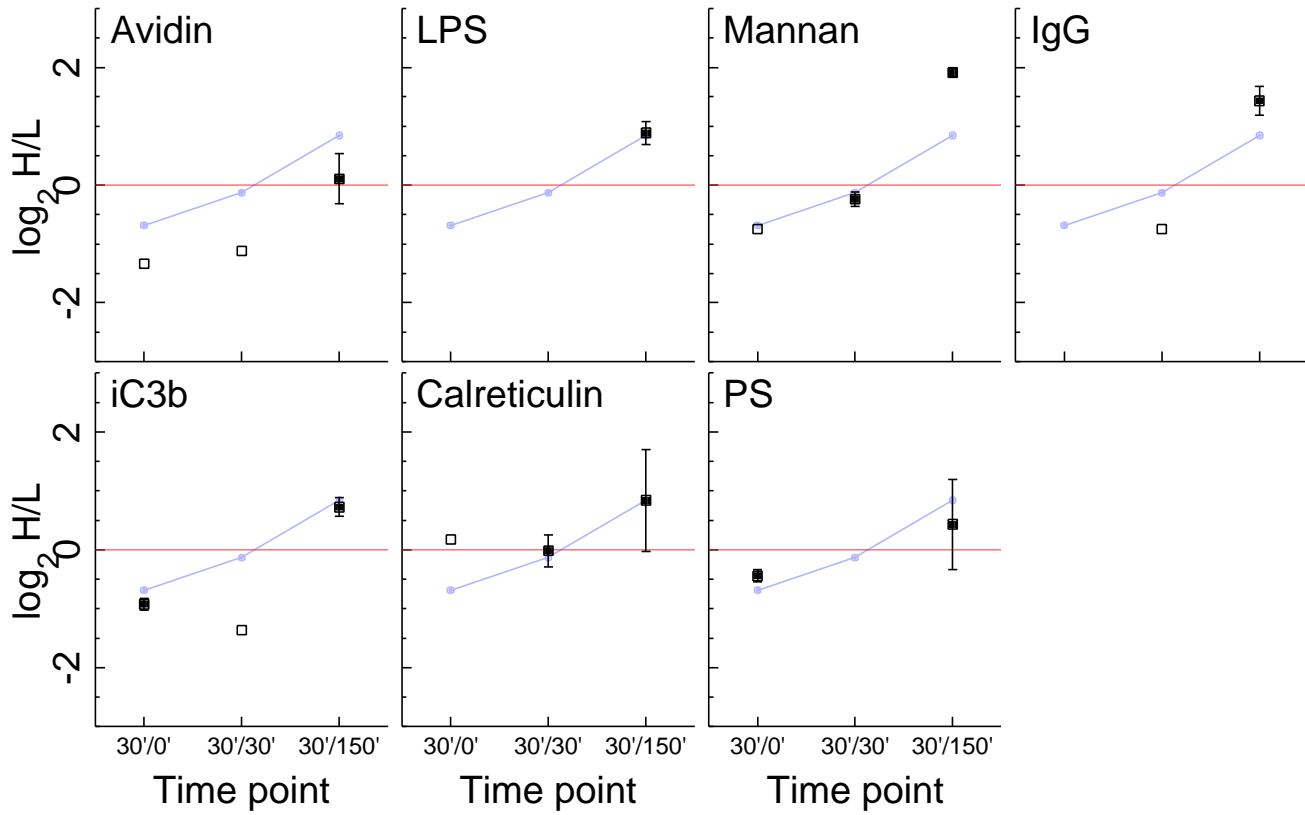

### hnrnpa0 (Q9CX86)

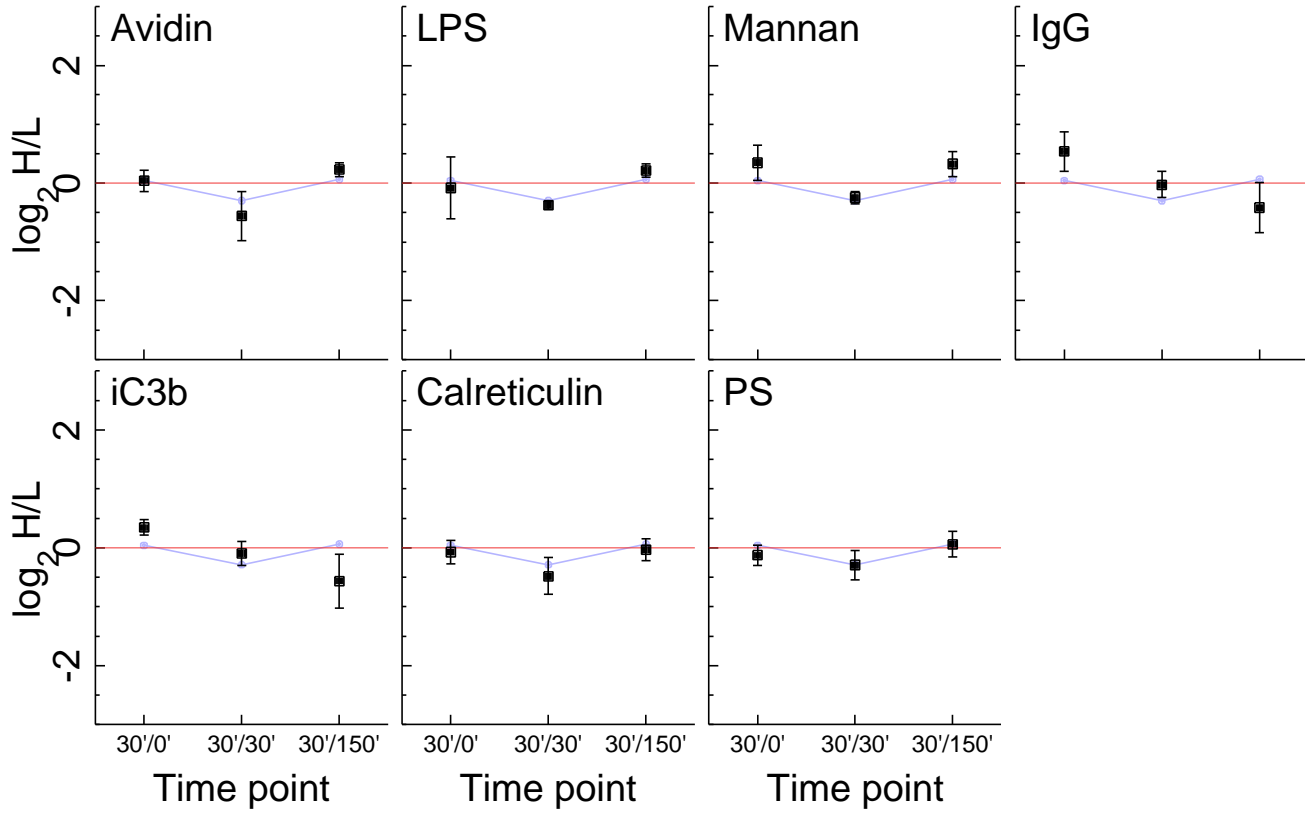

### hnrnpa1 (Q5EBP8)

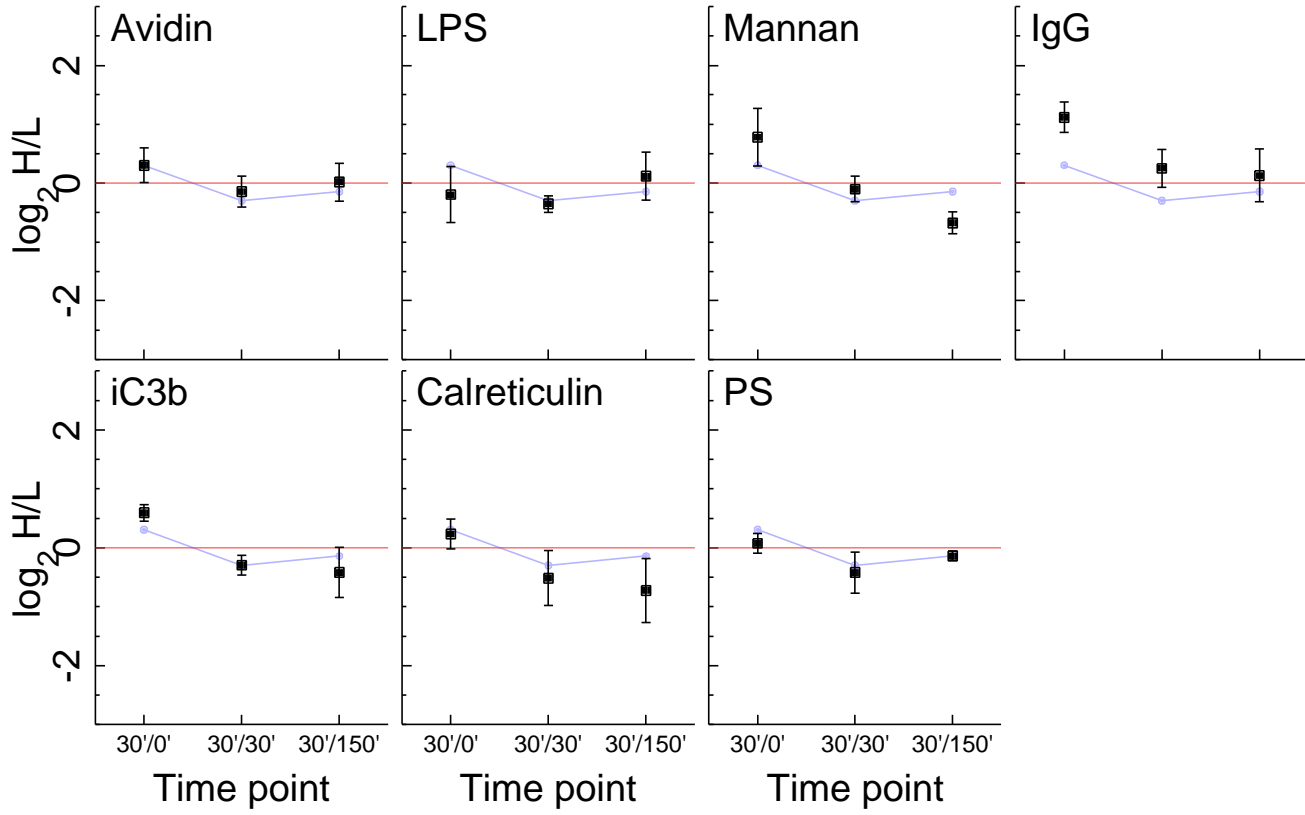

### hnrnpa2b1 (O88569)

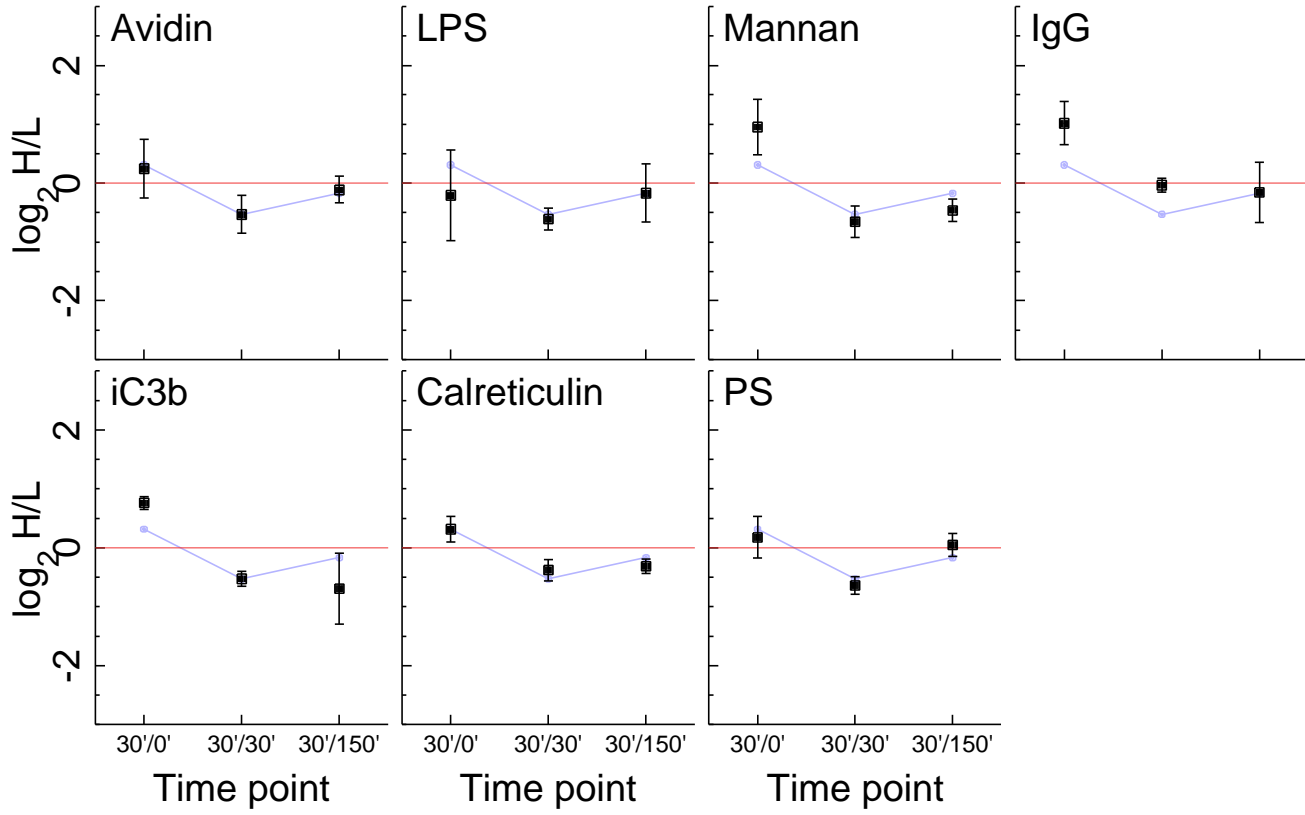



### hnrnpa3 (Q8BG05)

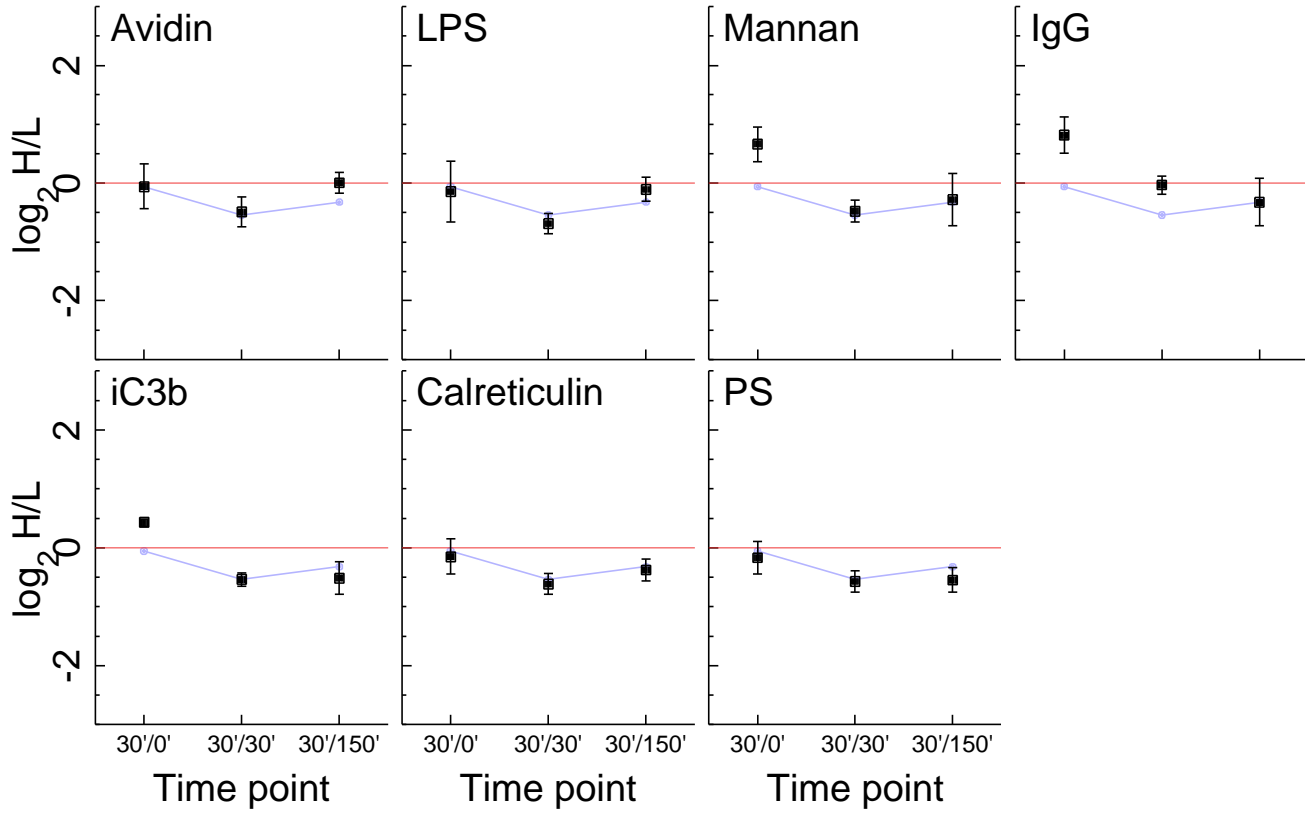

### hnrnpab (Q20BD0)

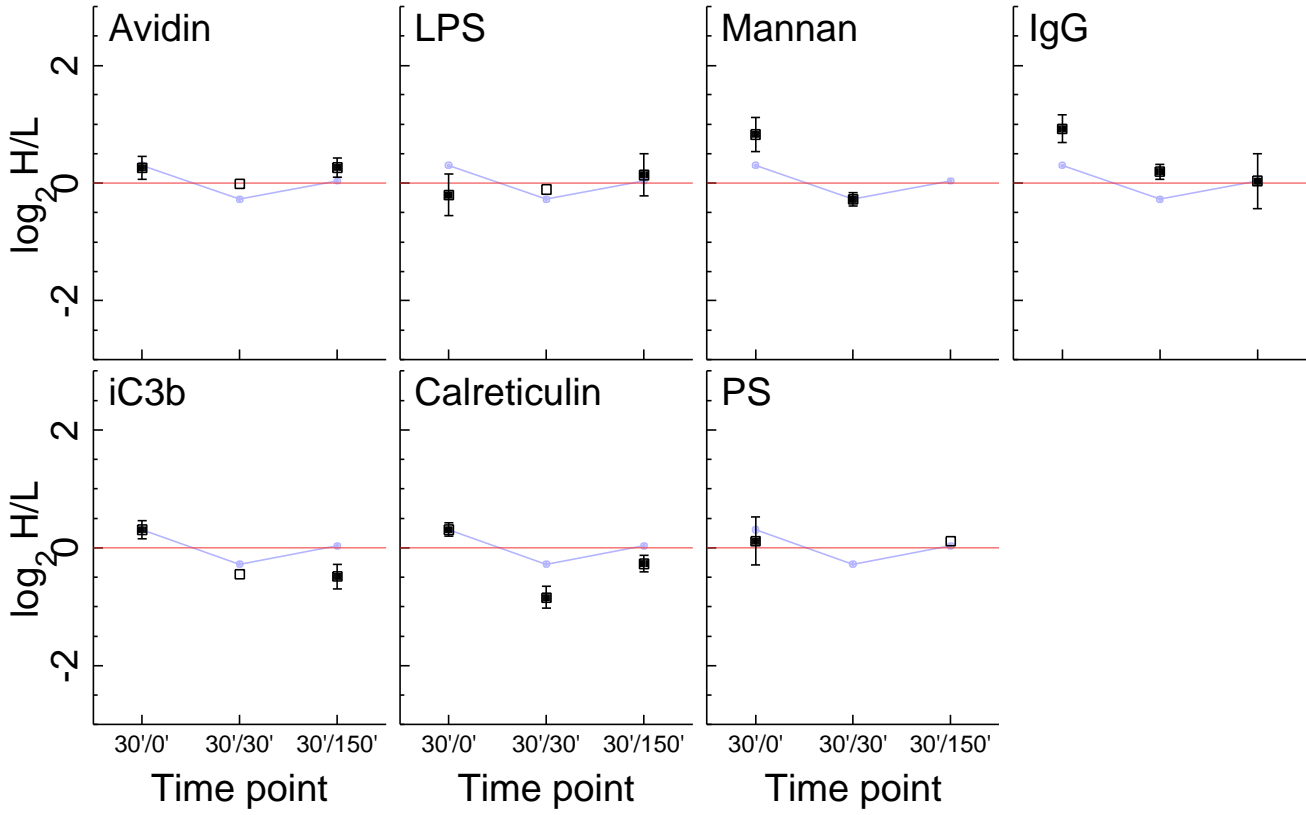

### hnrnpc (Q9Z204)

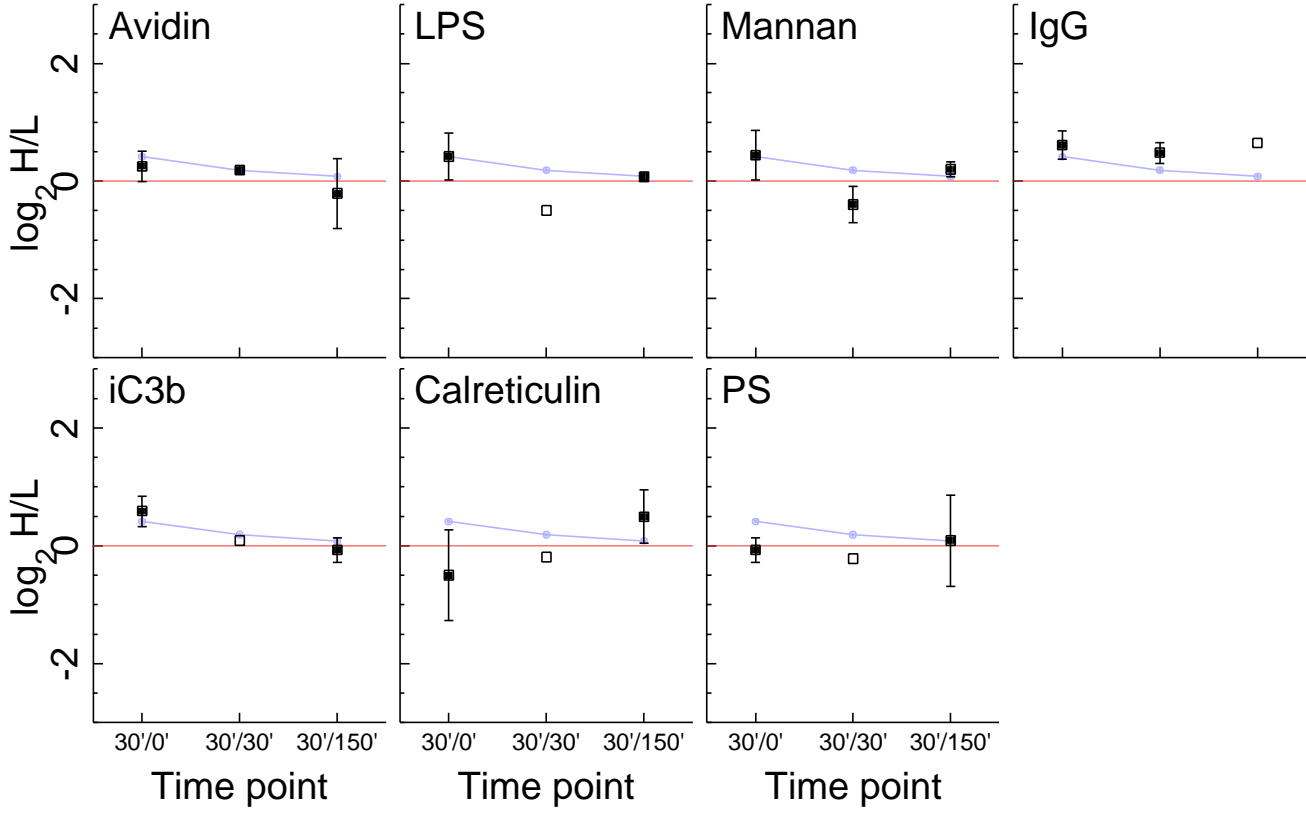

### hnrnpd (Q60668)

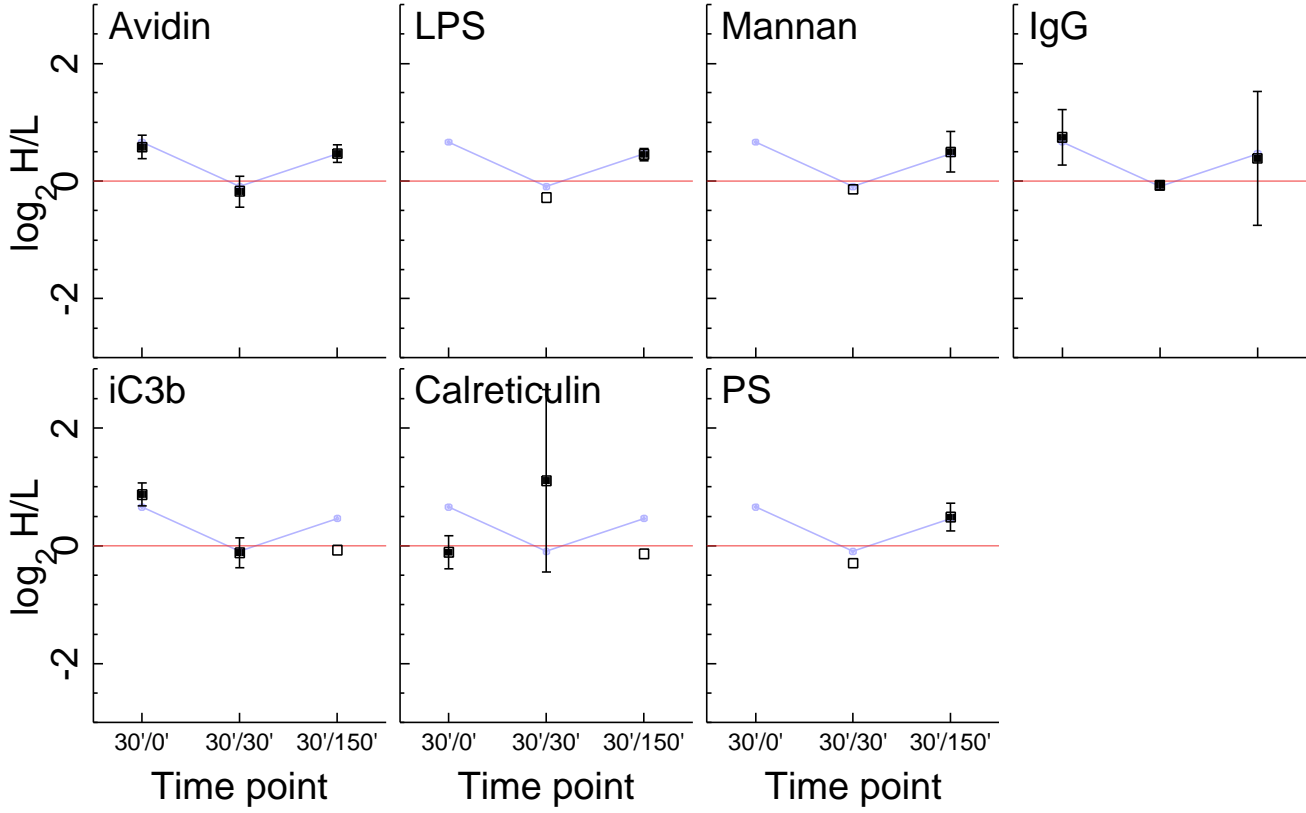

hnrnpf (Q9Z2X1)

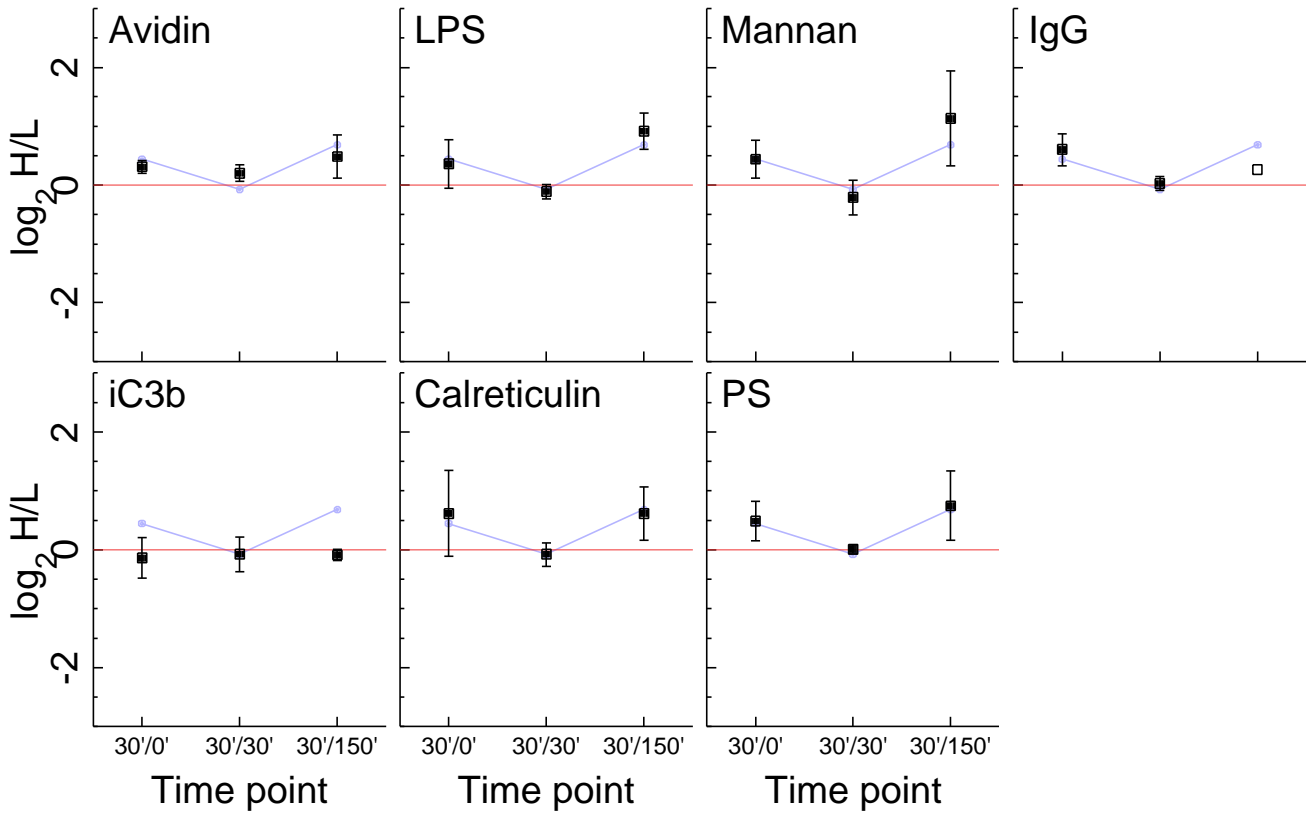

### hnrnph1 (Q8C2Q7)

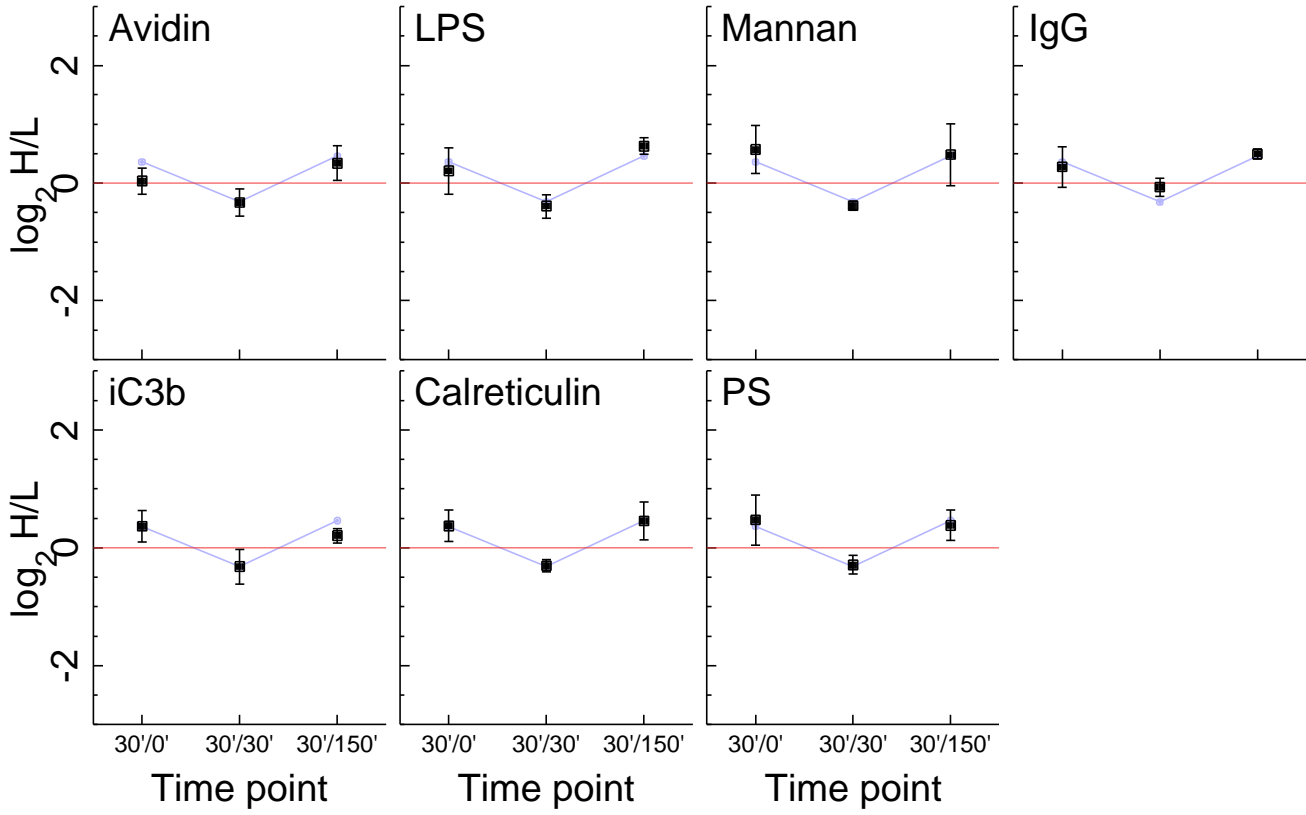

### hnrnpk (P61979)

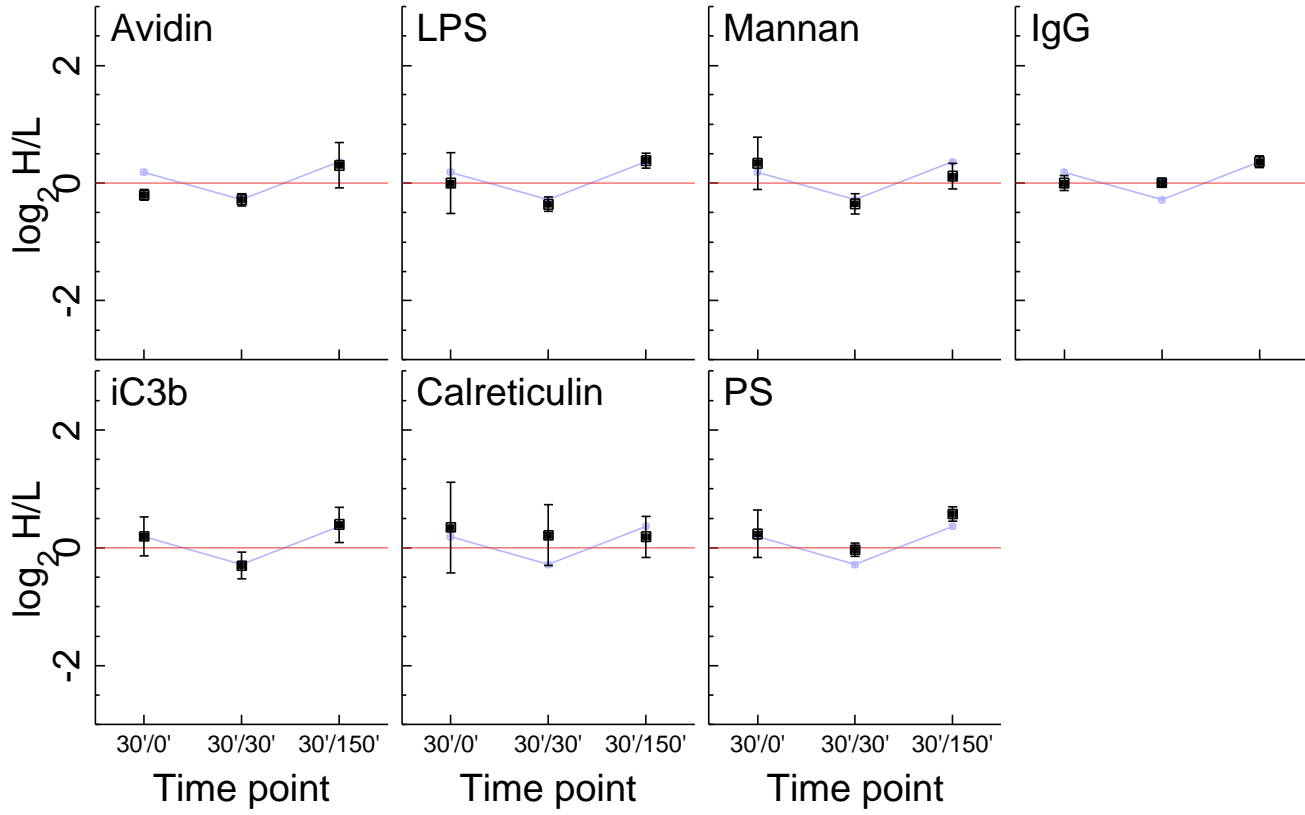

# hnrnp1 (G5E924)

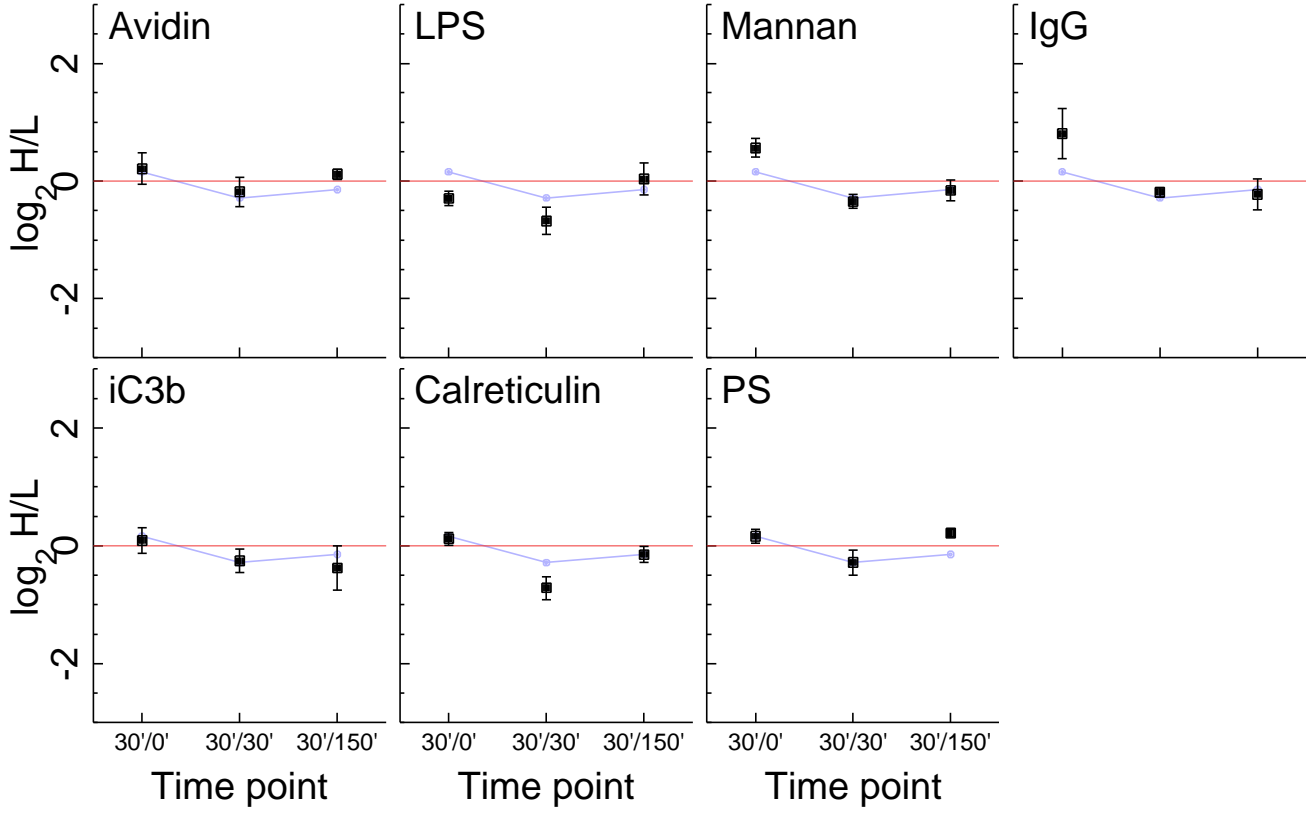



# hnrnrm (Q9D0E1)

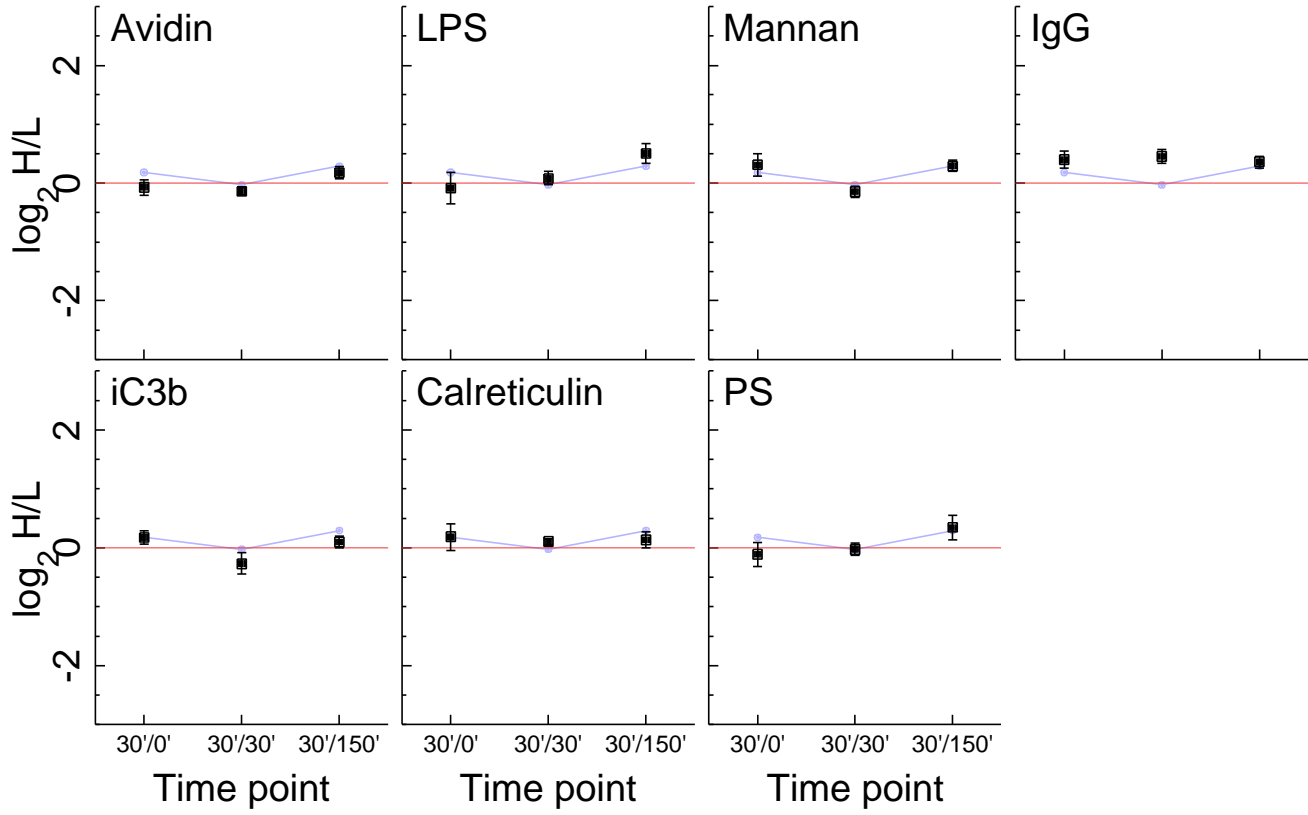

### hnrnpu (Q8VEK3)

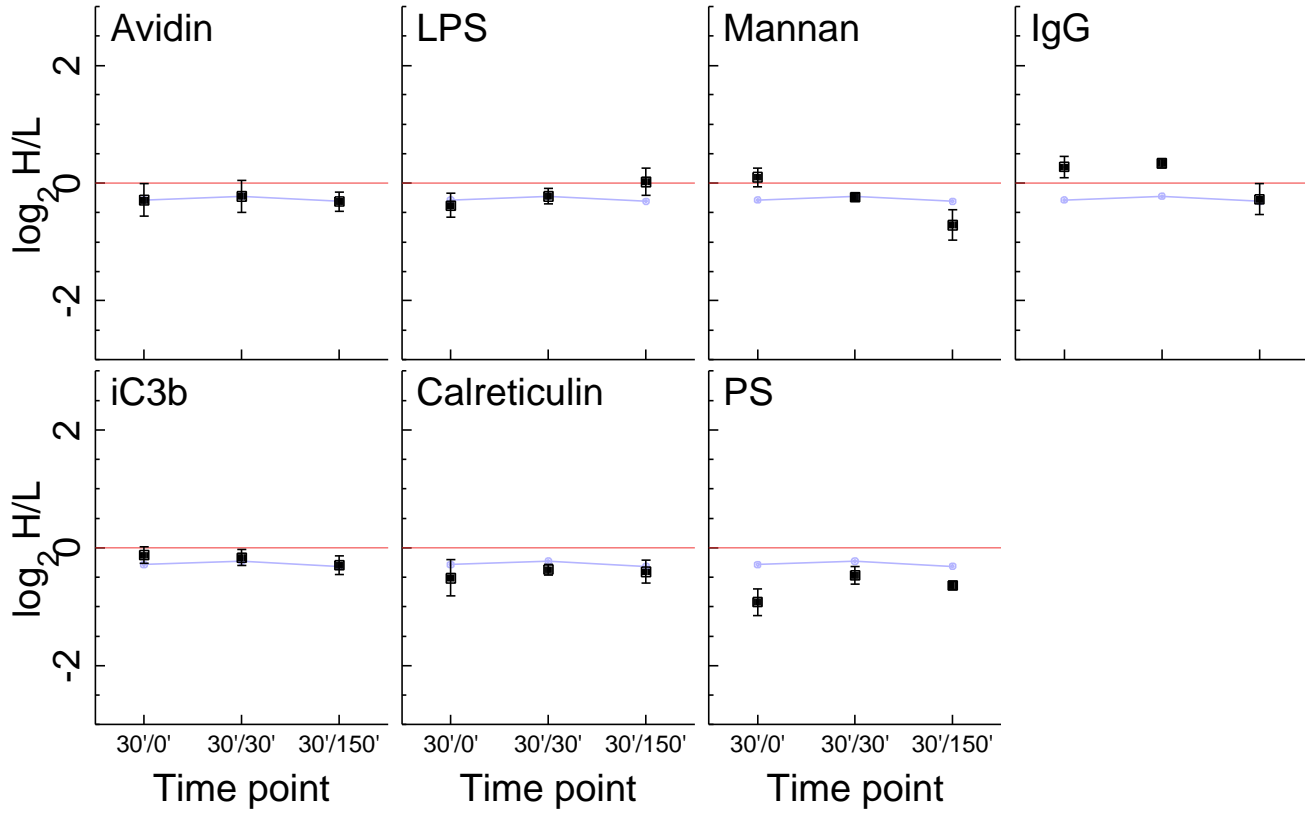

### hp1bp3 (Q3TEA8)

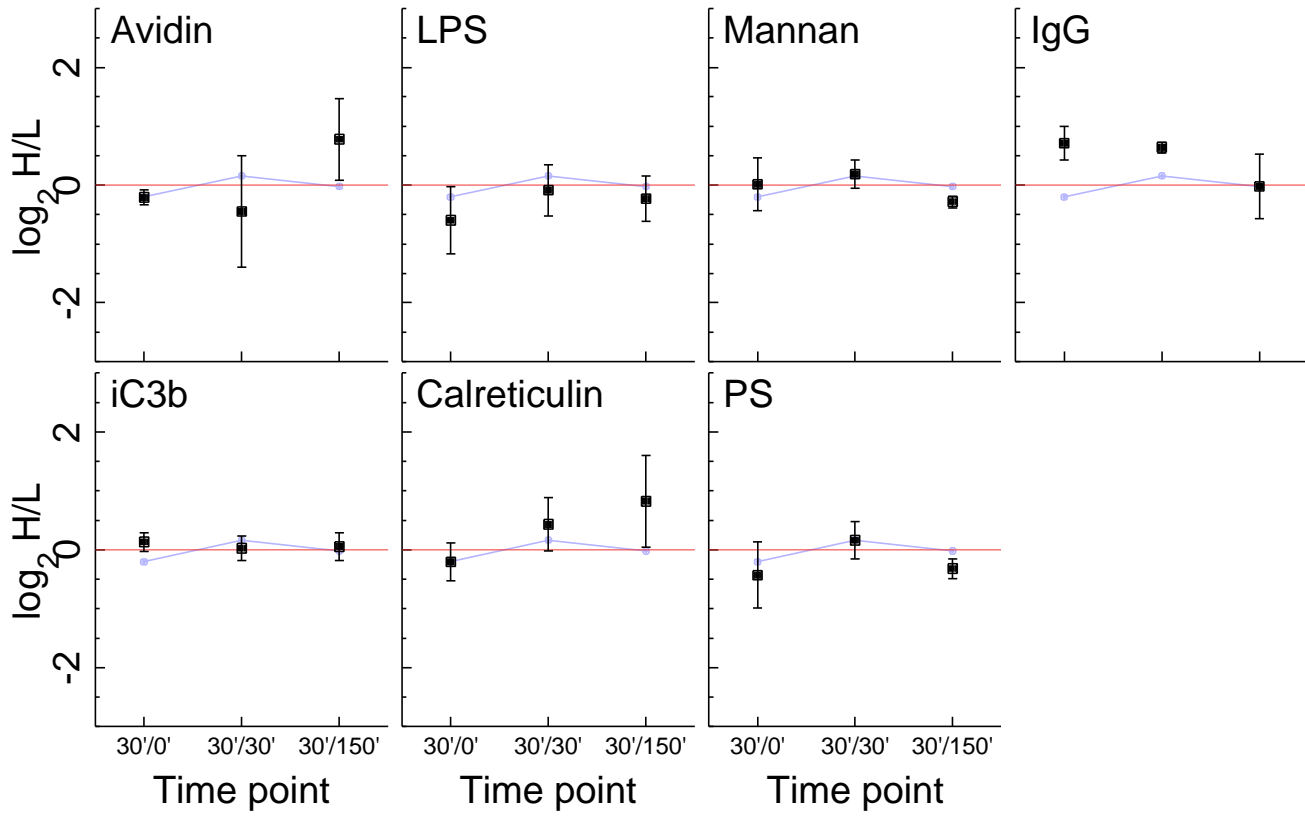

### hpcal1 (P62748)

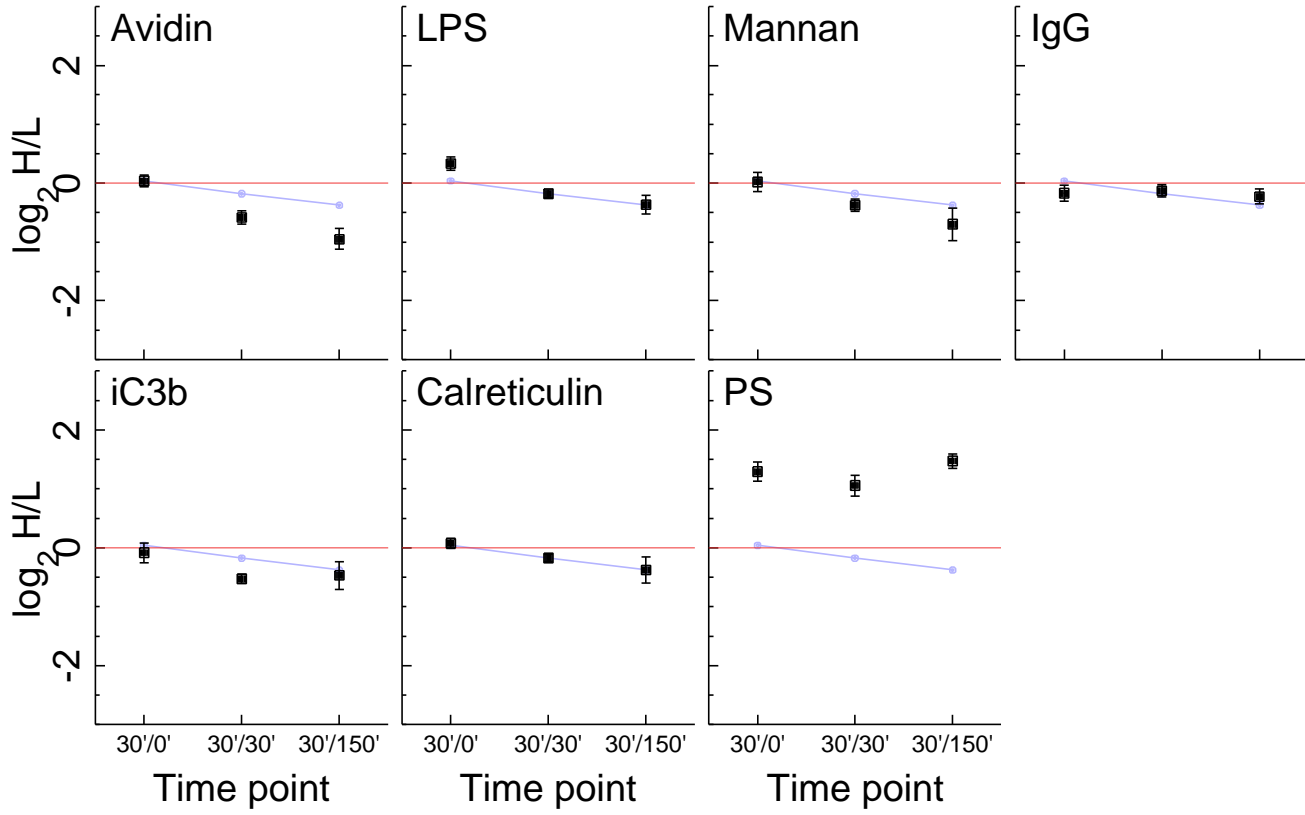

hps1 (Q3U309)

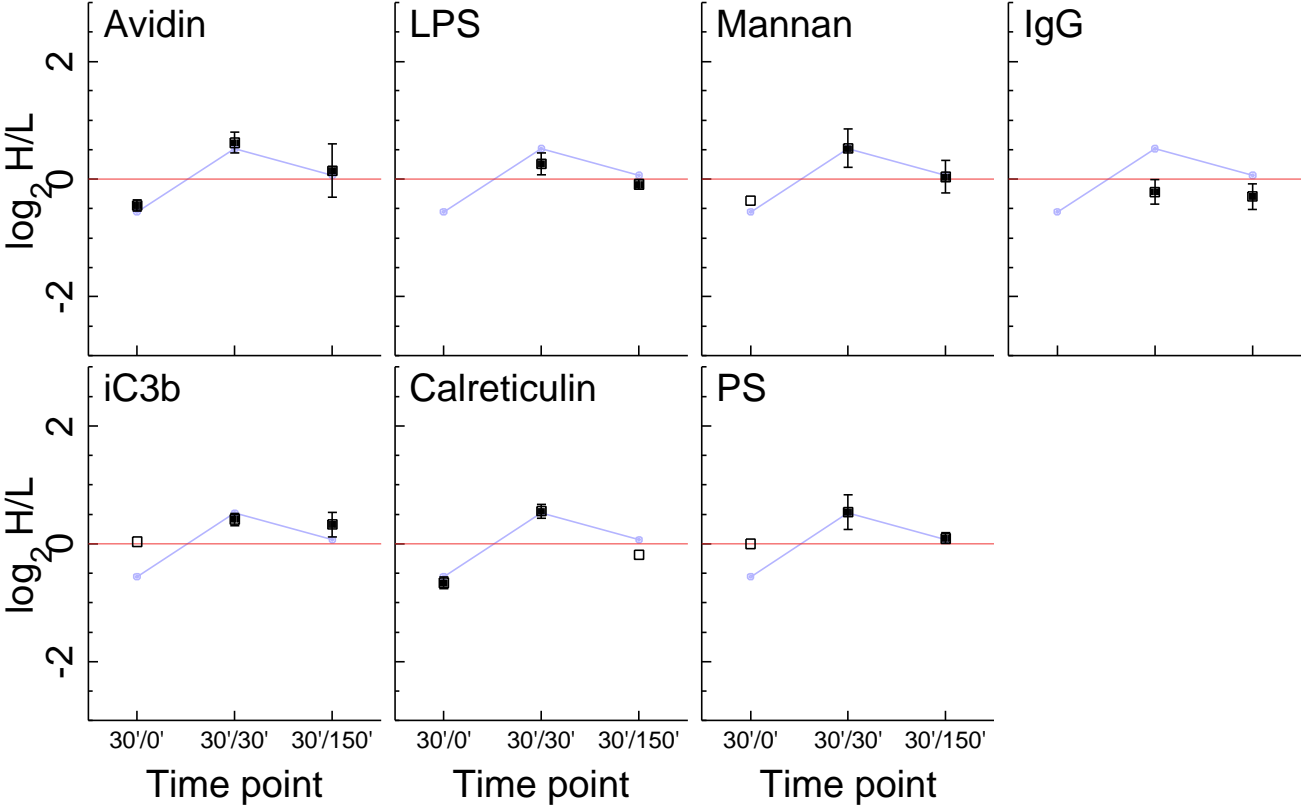

### hps3 (Q91VB4)

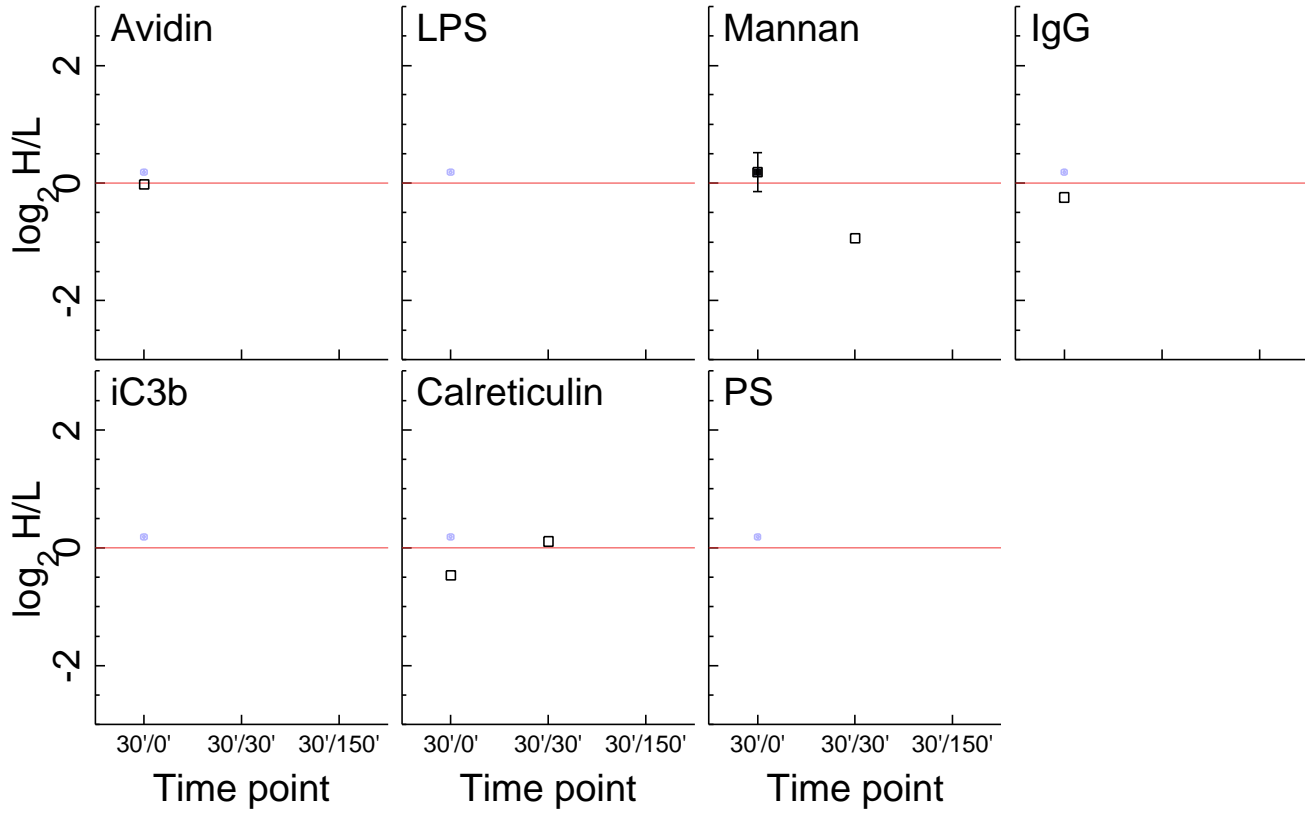

### hps4 (Q99KG7)

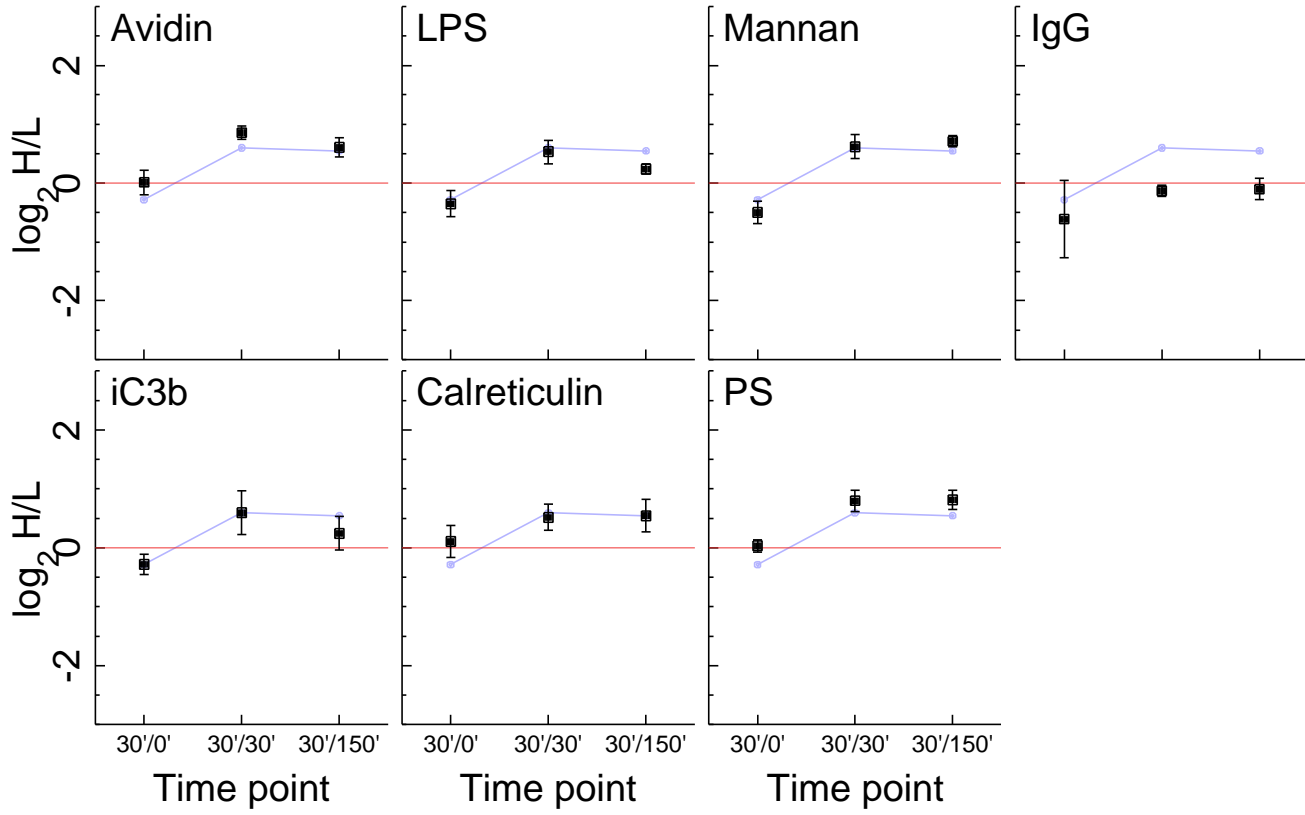

### hpse (Q6YGZ1)

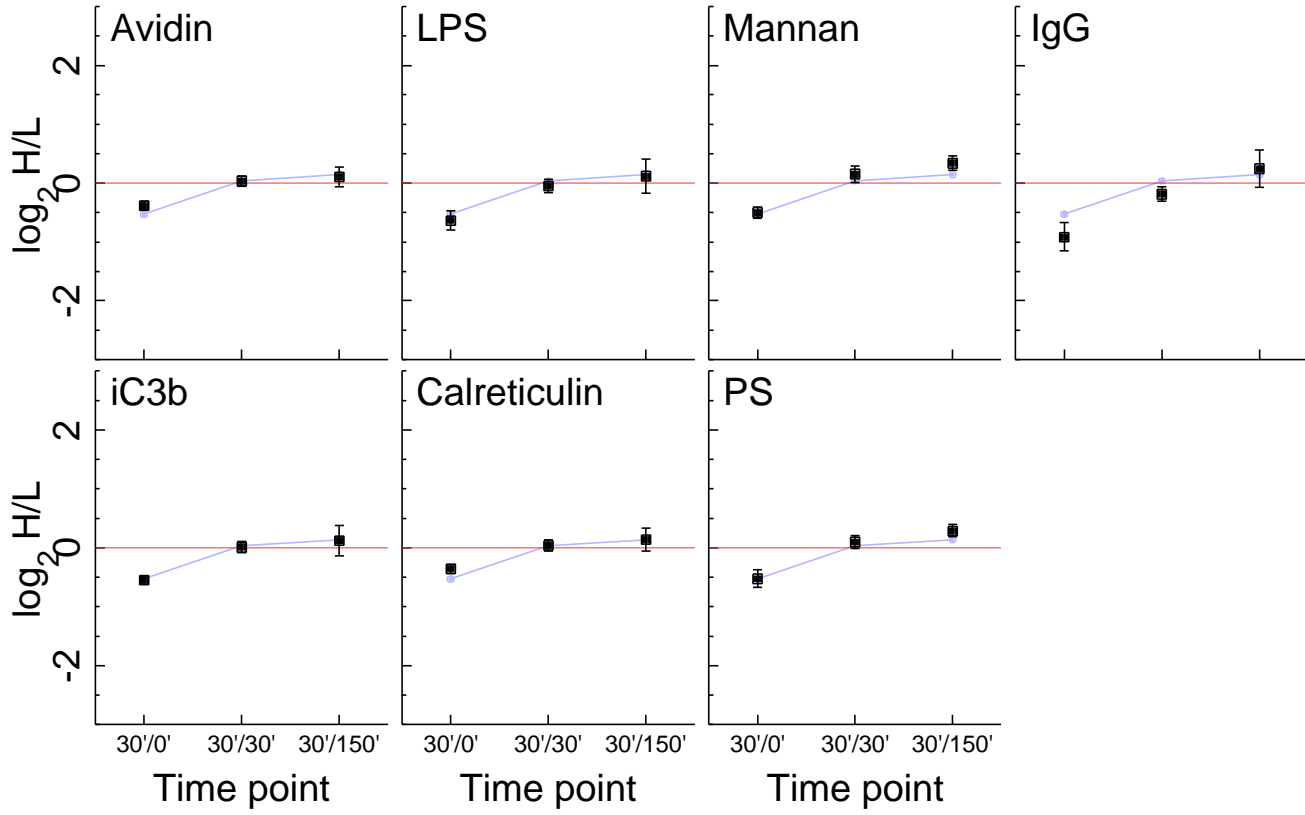



### hras1 (Q61411)

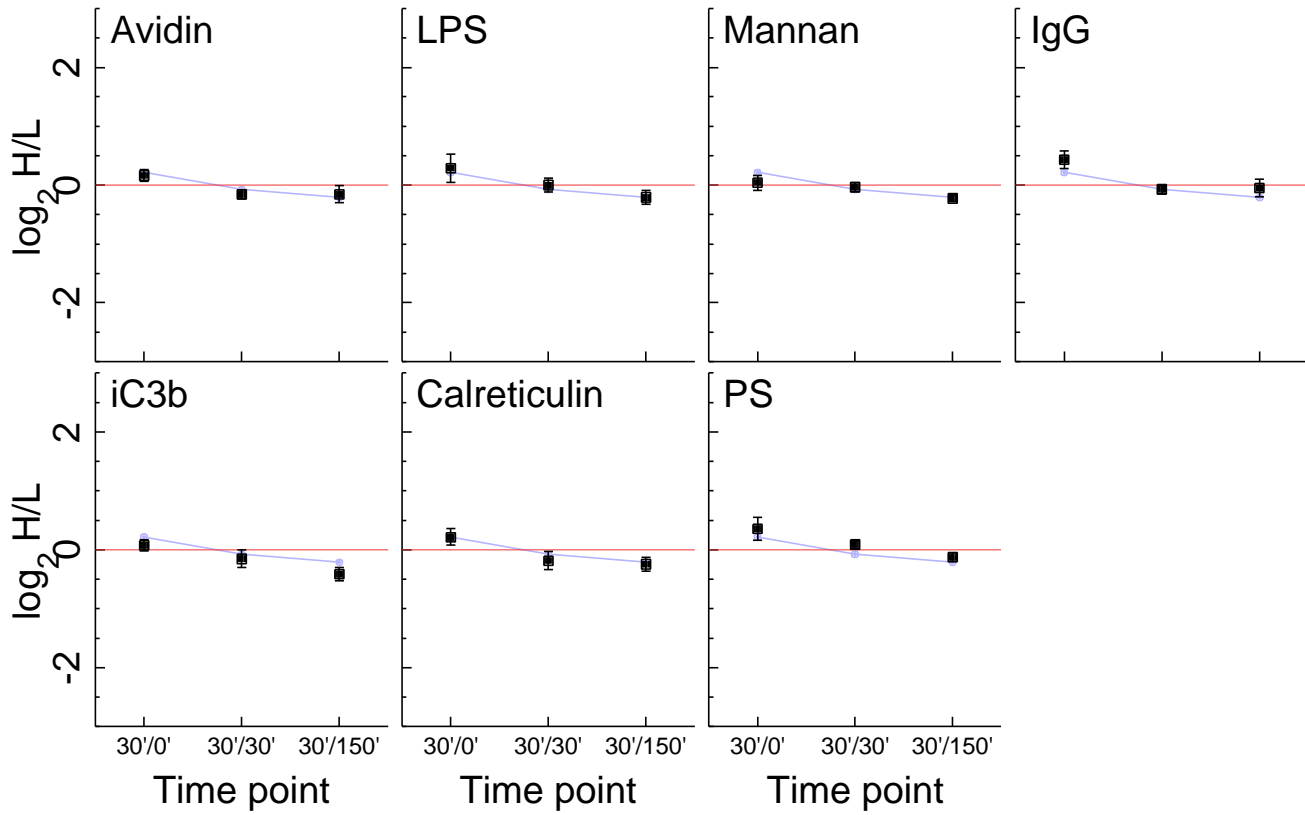

# hs2st1 (Q8R3H7)

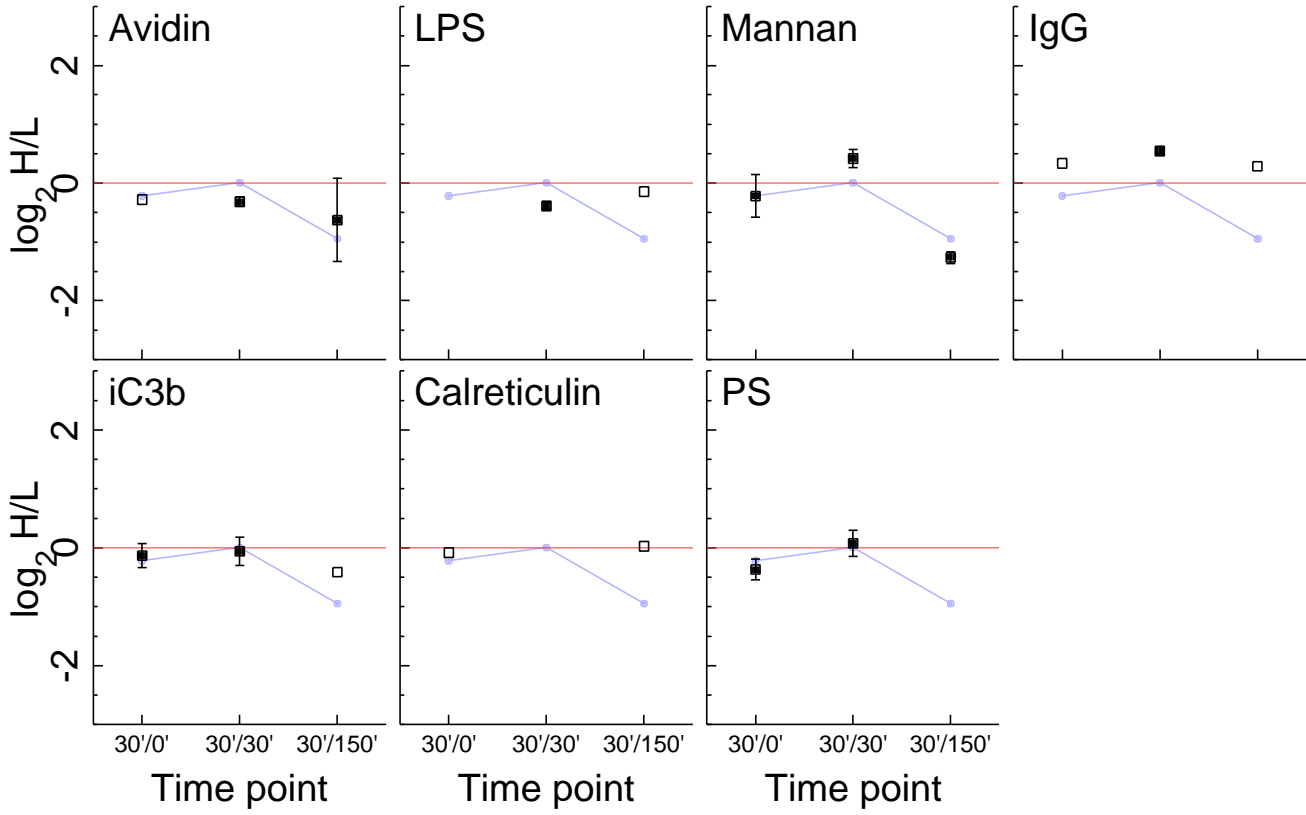

### hsd17b10 (A2AFQ2)

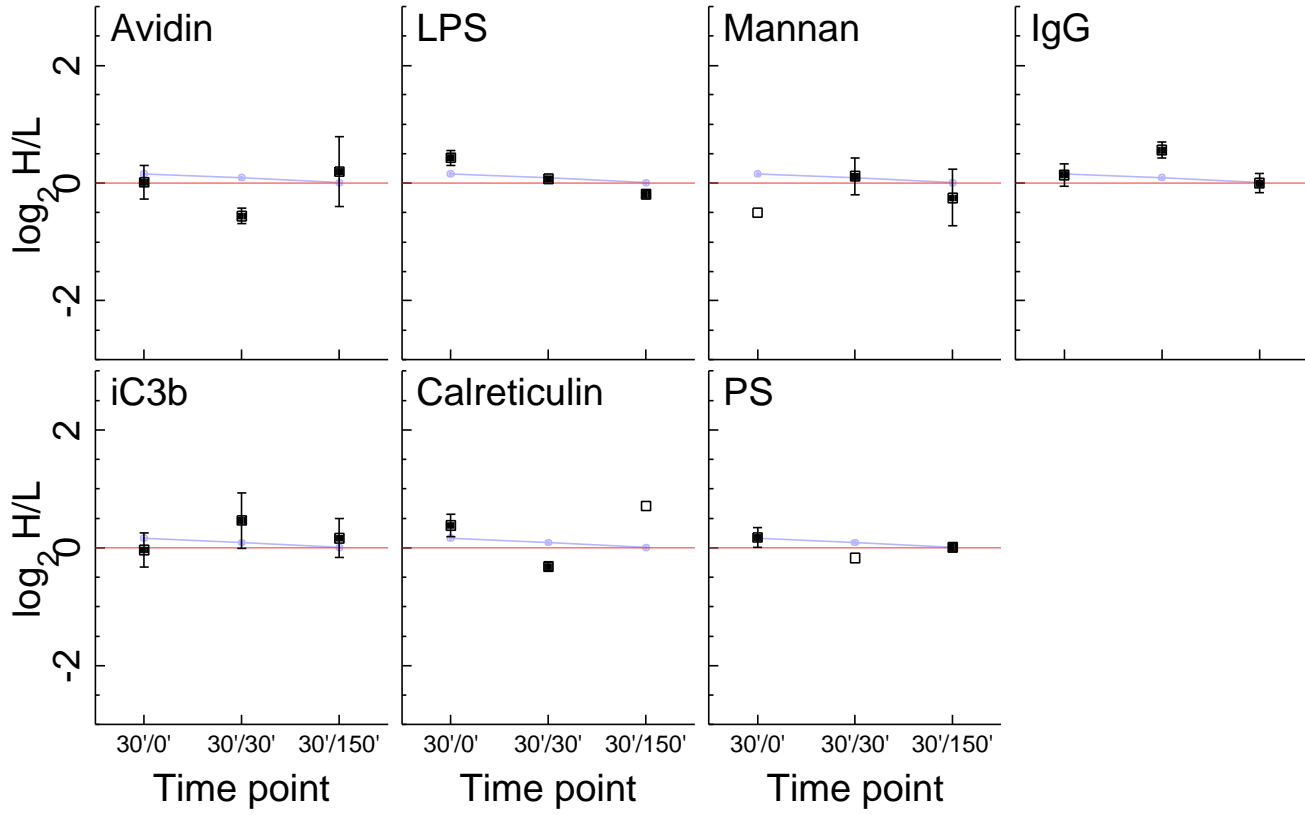

### hsd17b11 (Q9EQ06)

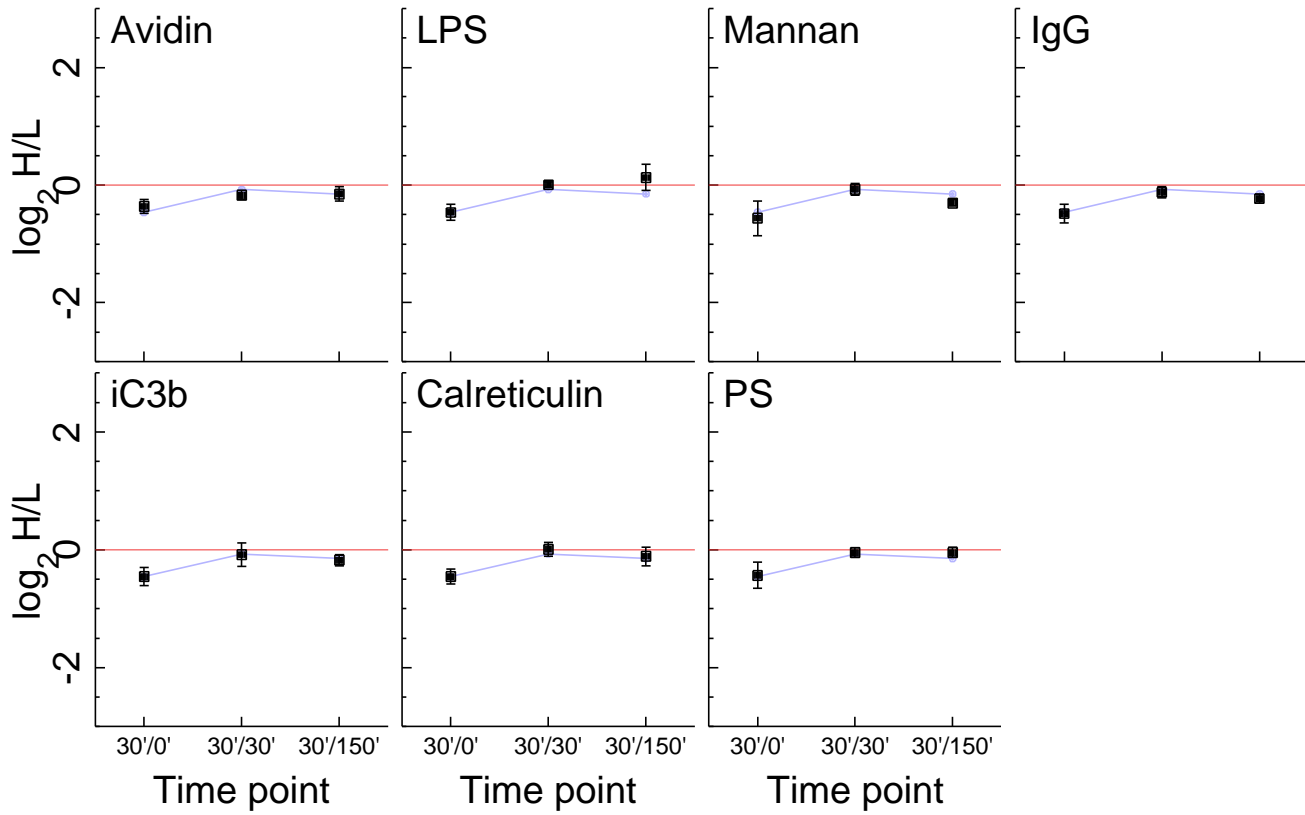

### hsd17b12 (O70503)

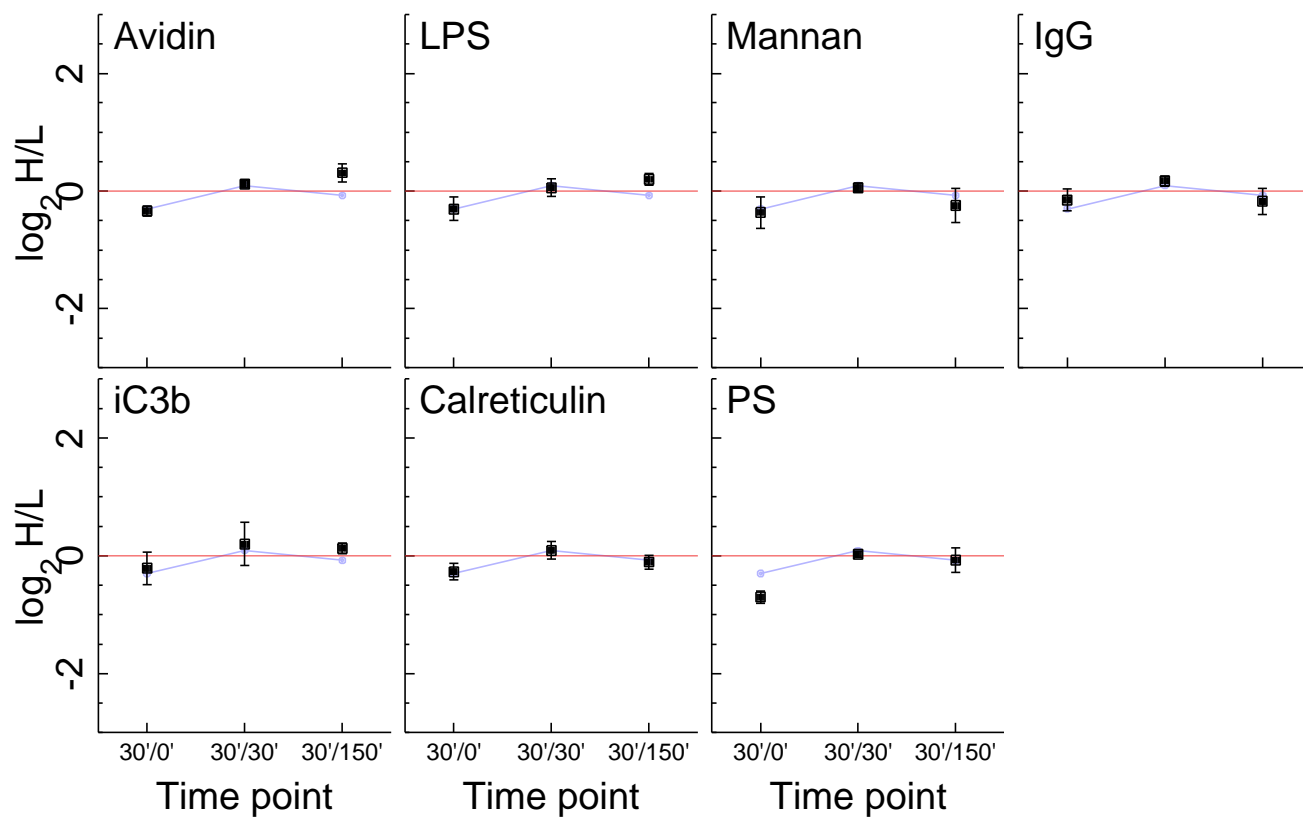

### hsd17b4 (P51660)

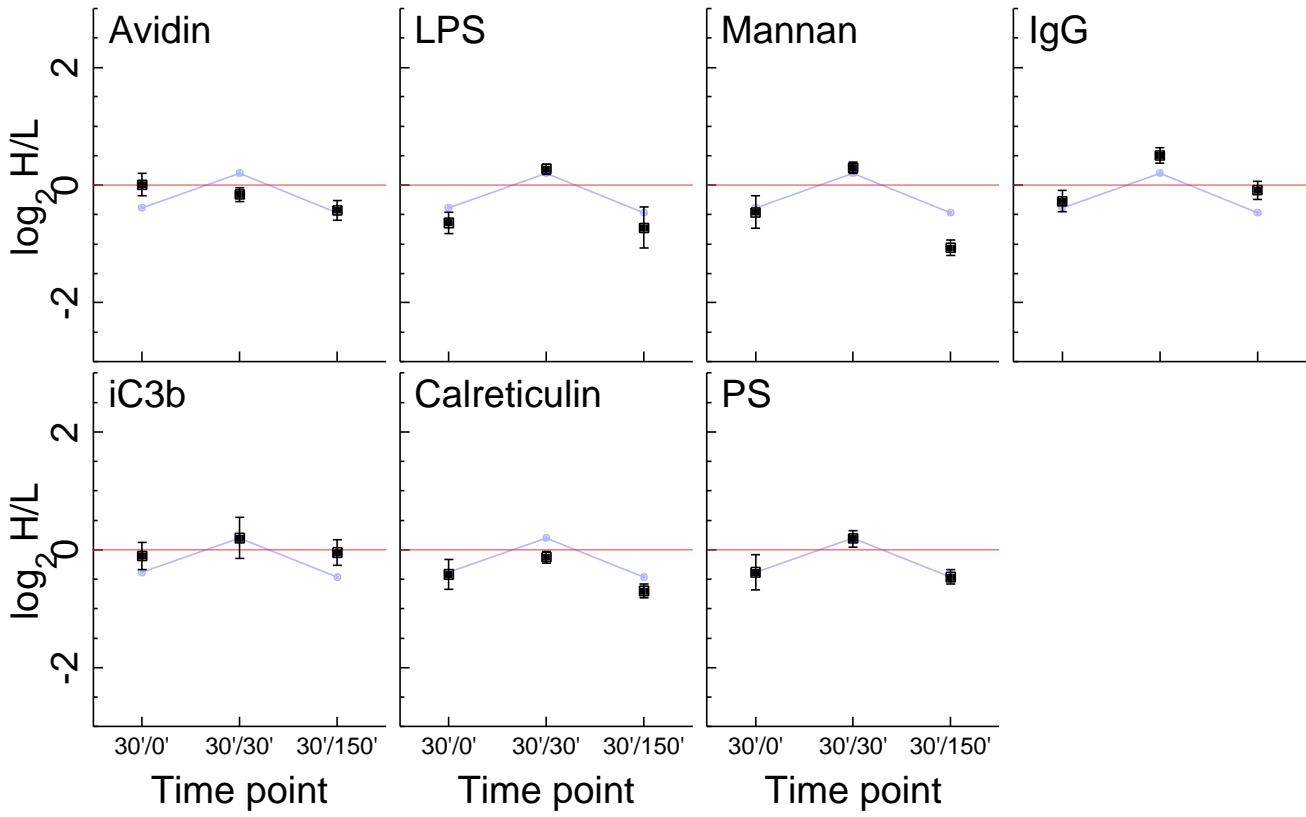

### hsl1 (Q8BTX9)

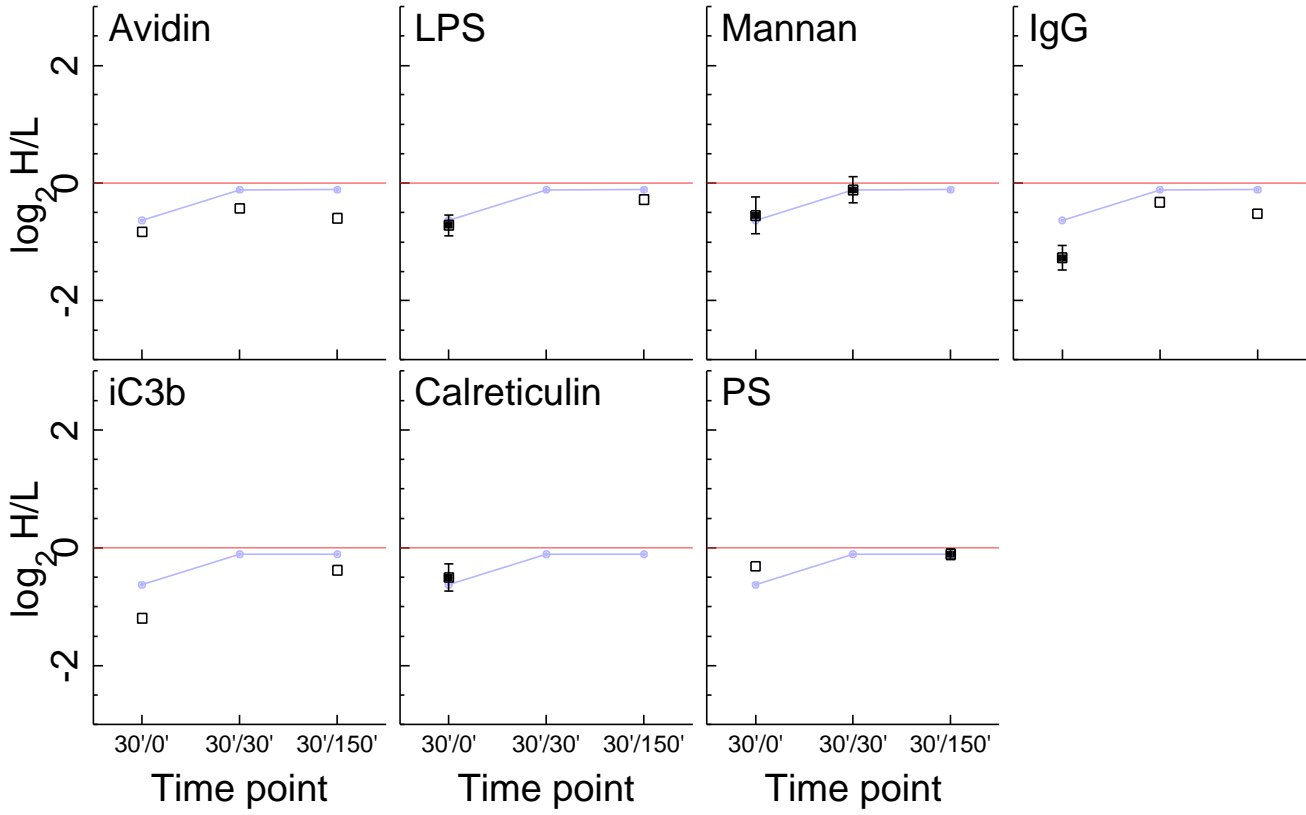

### hsp90aa1 (P07901)

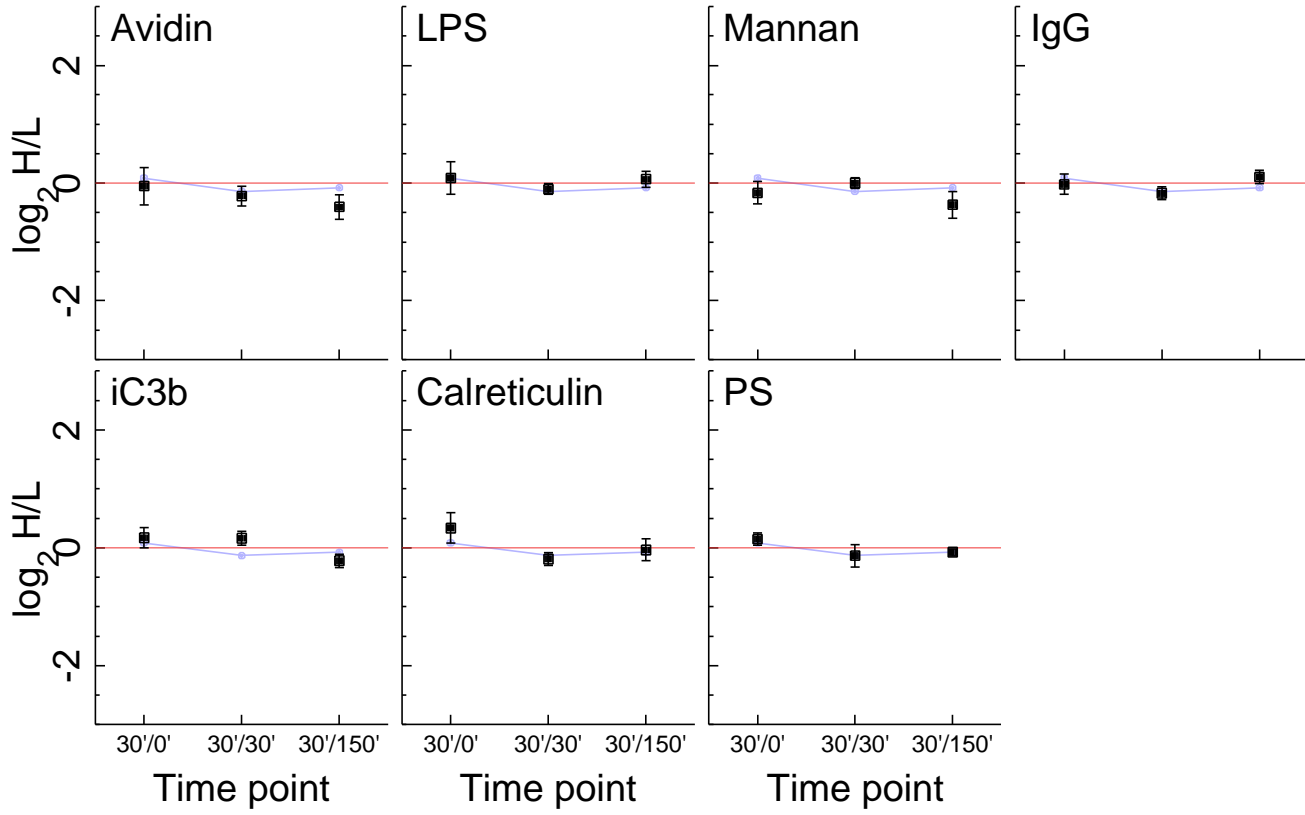



### hsp90ab1 (P11499)

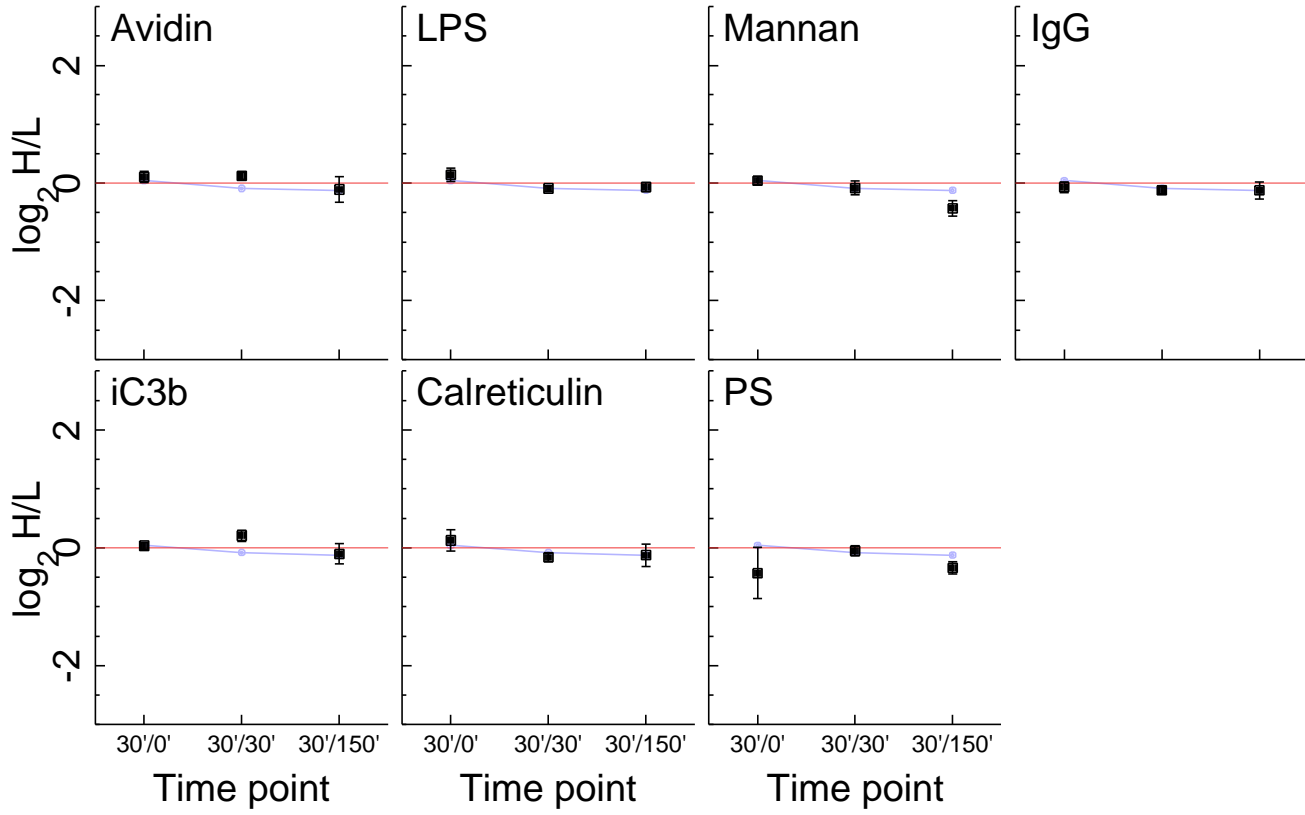

hsp90b1 (P08113)

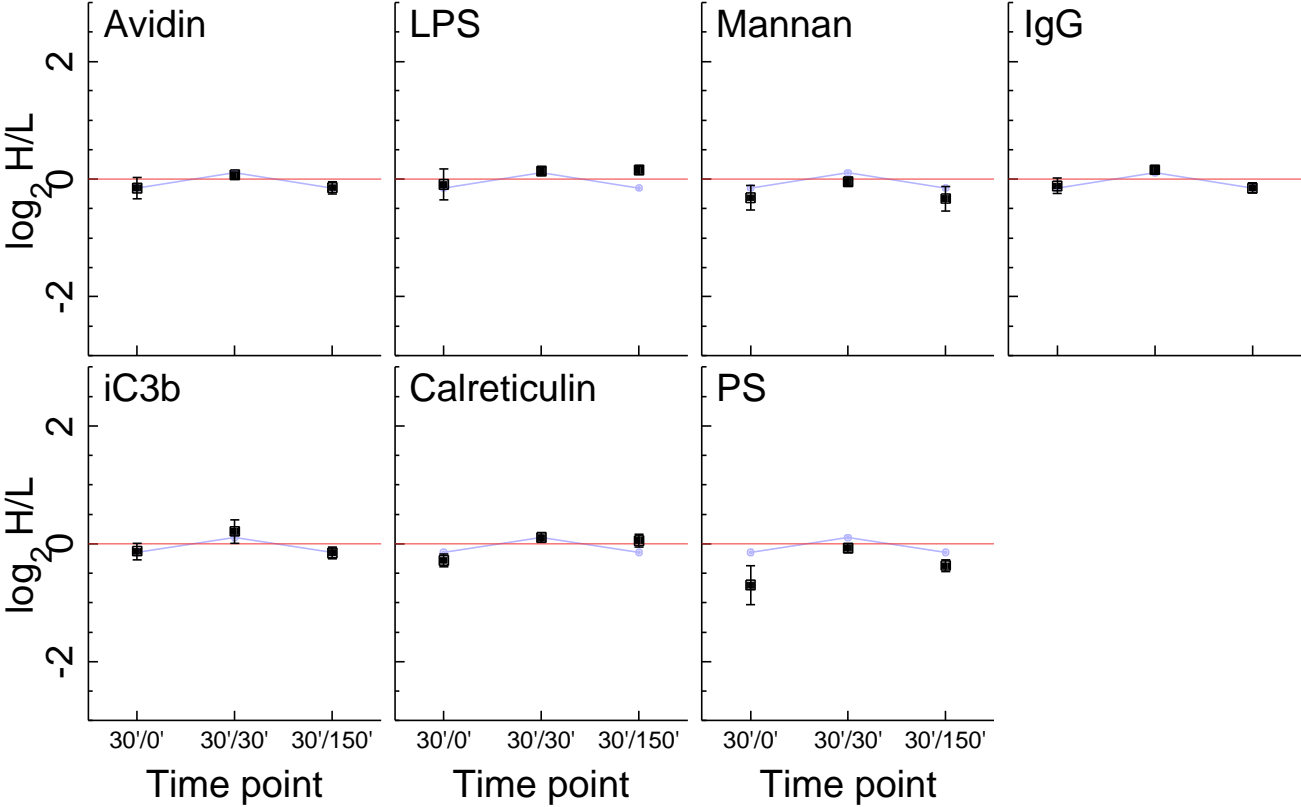

### hspa4 (Q3U2G2)

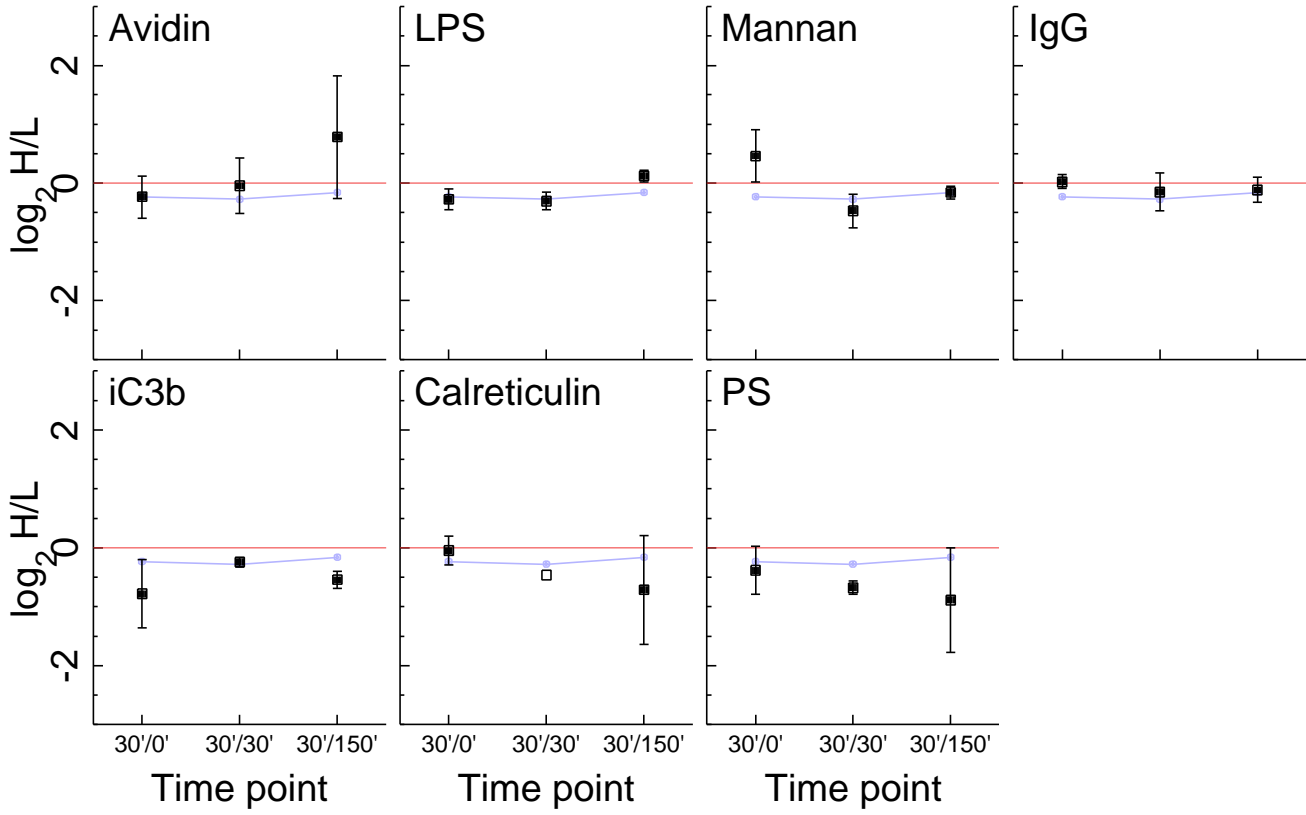

### hspa5 (P20029)

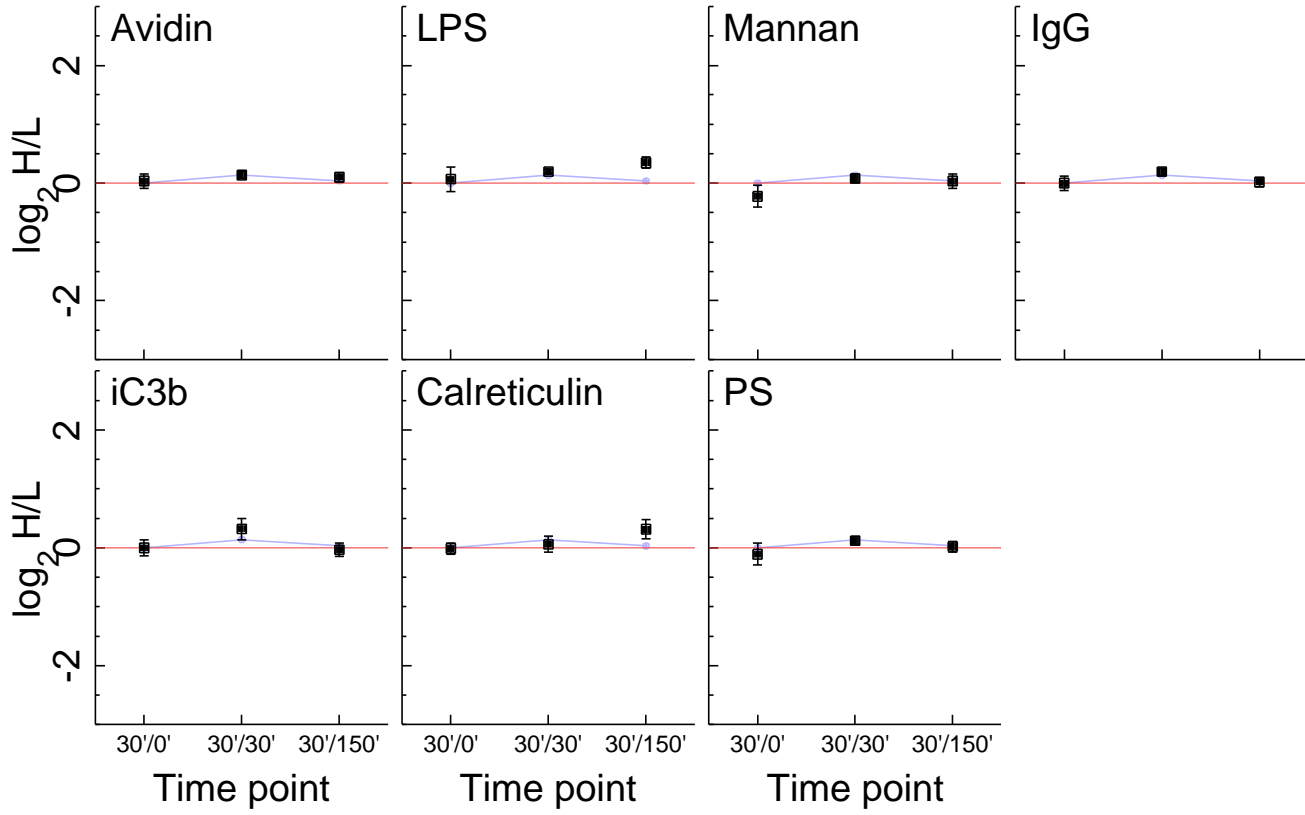

### hspa8 (P63017)

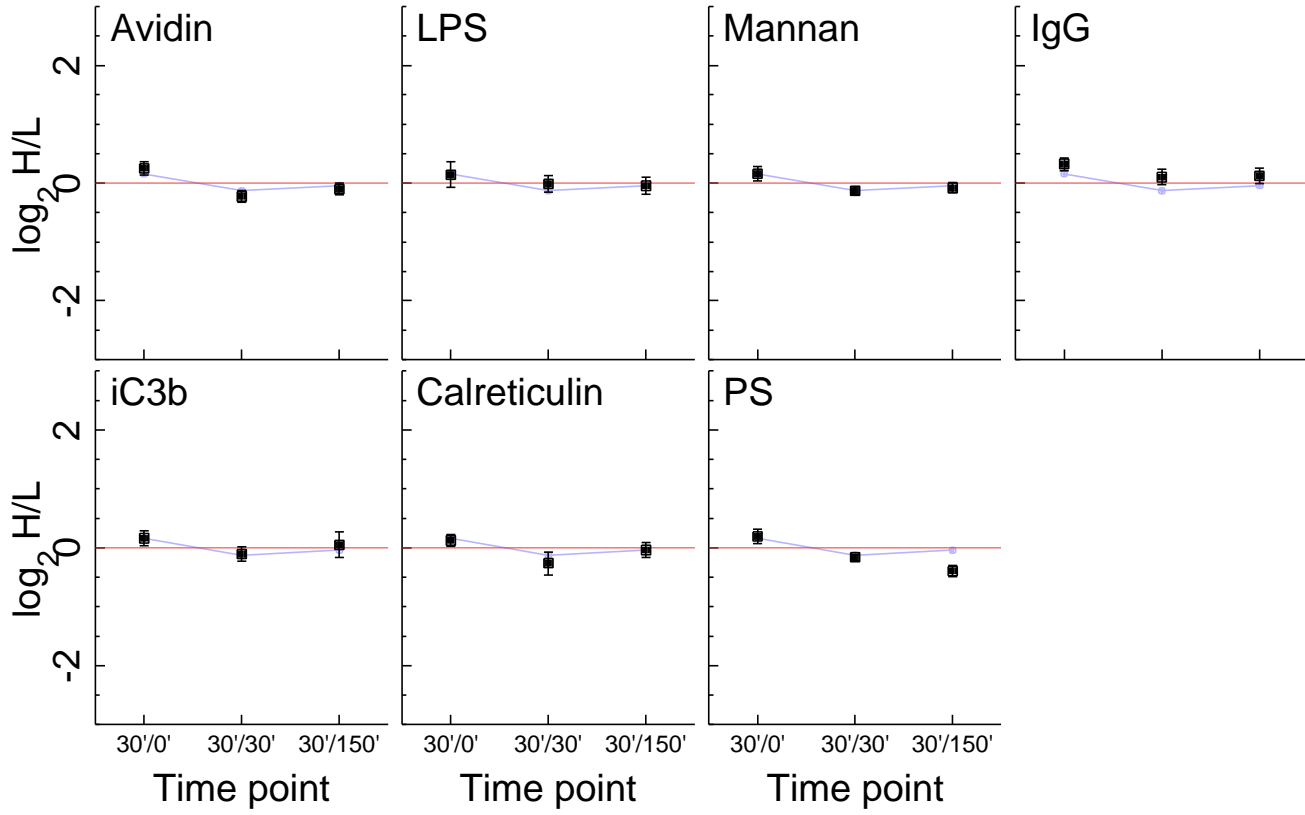

### hspa9 (P38647)

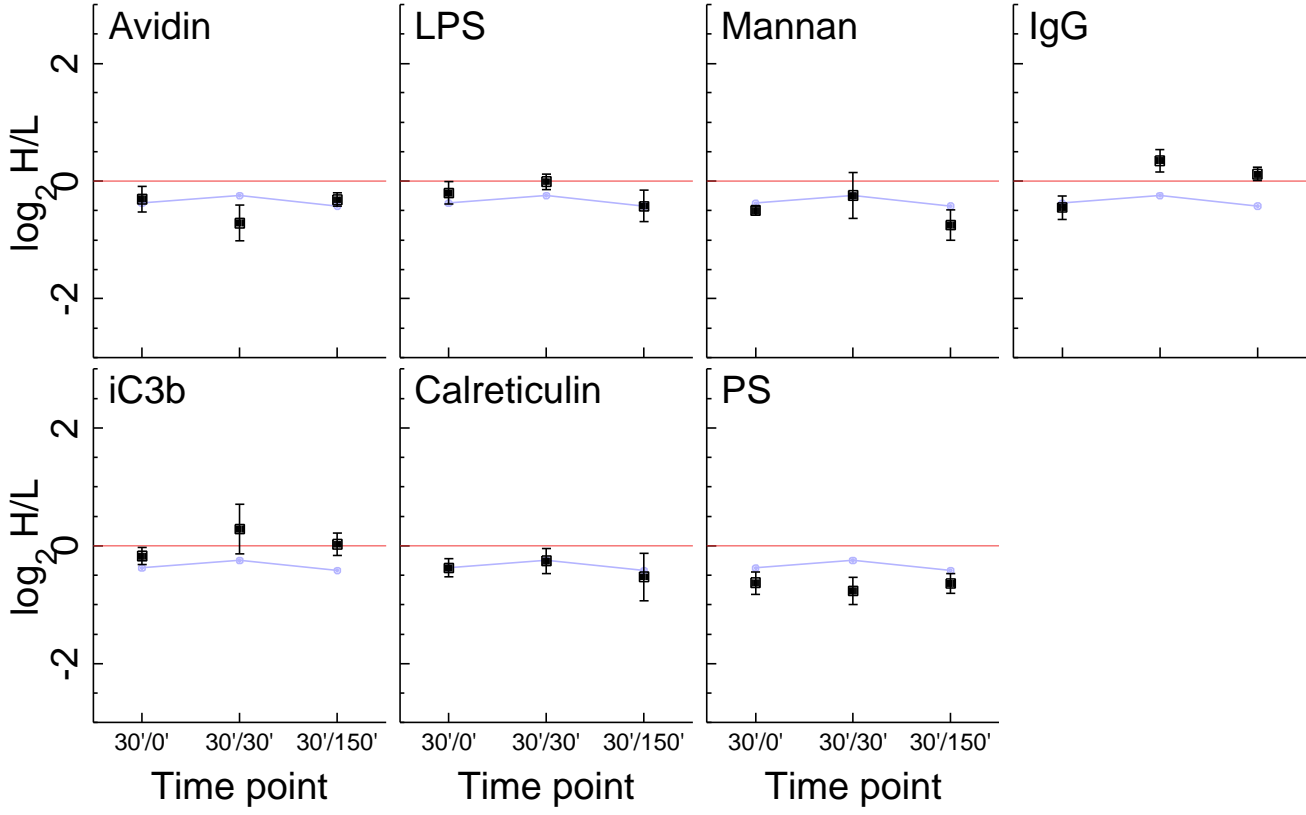

### hspd1 (P63038)

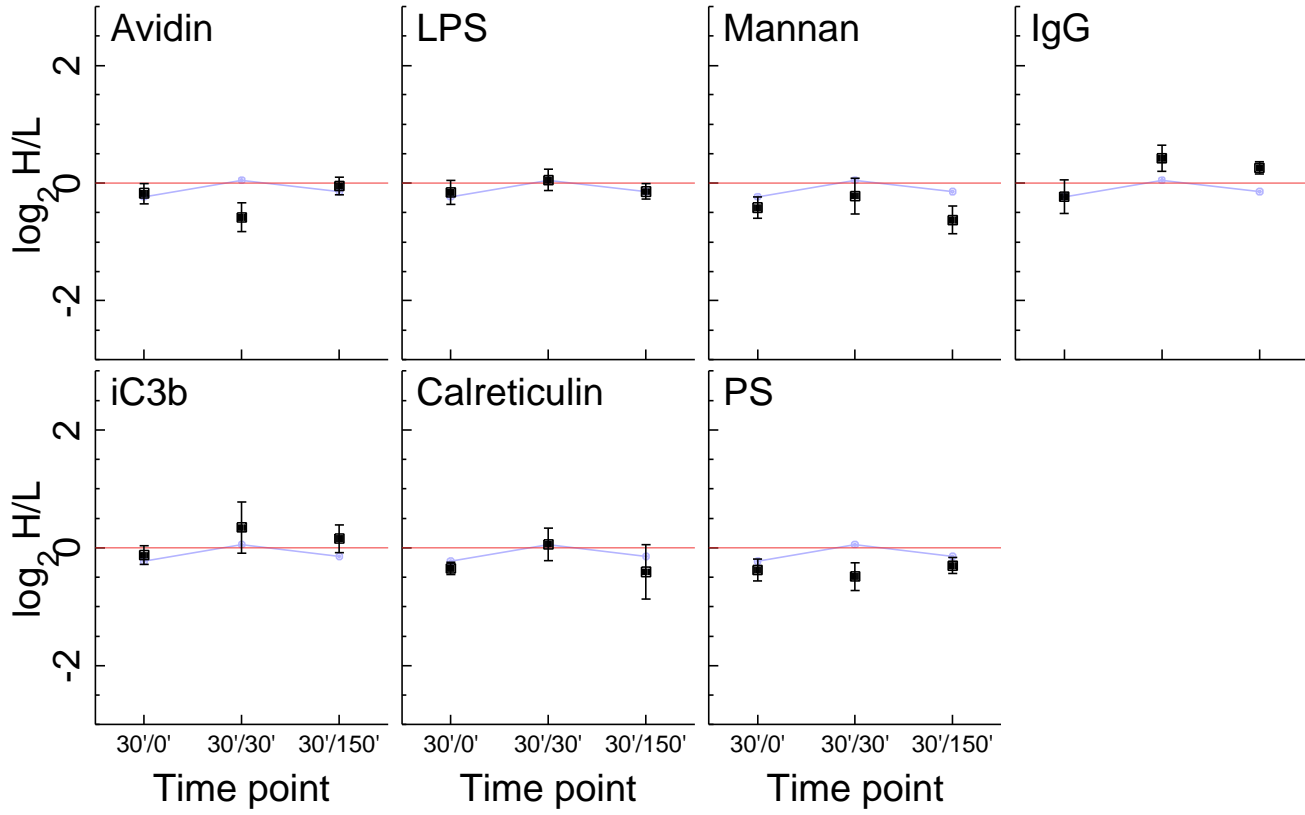

# hspe1 (Q64433)

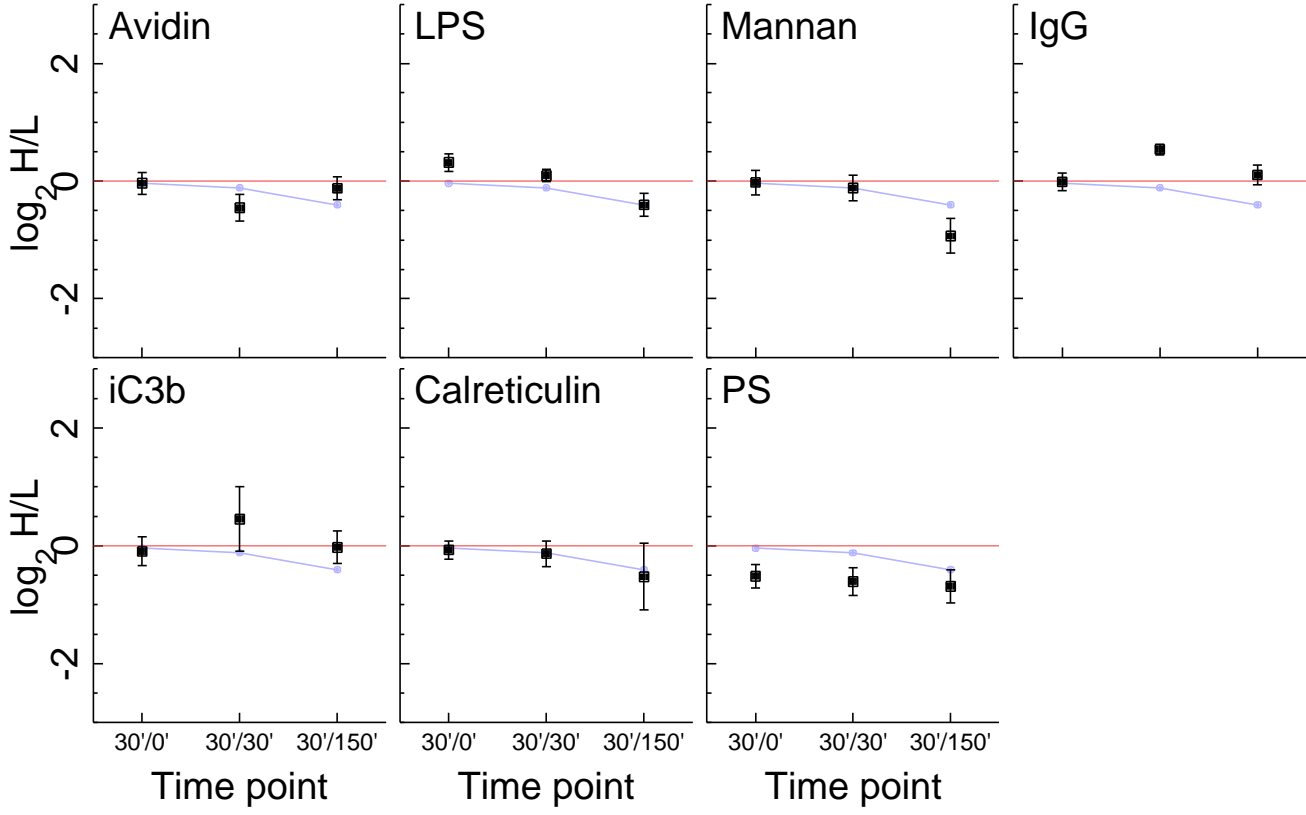



### hspg2 (E9PZ16)

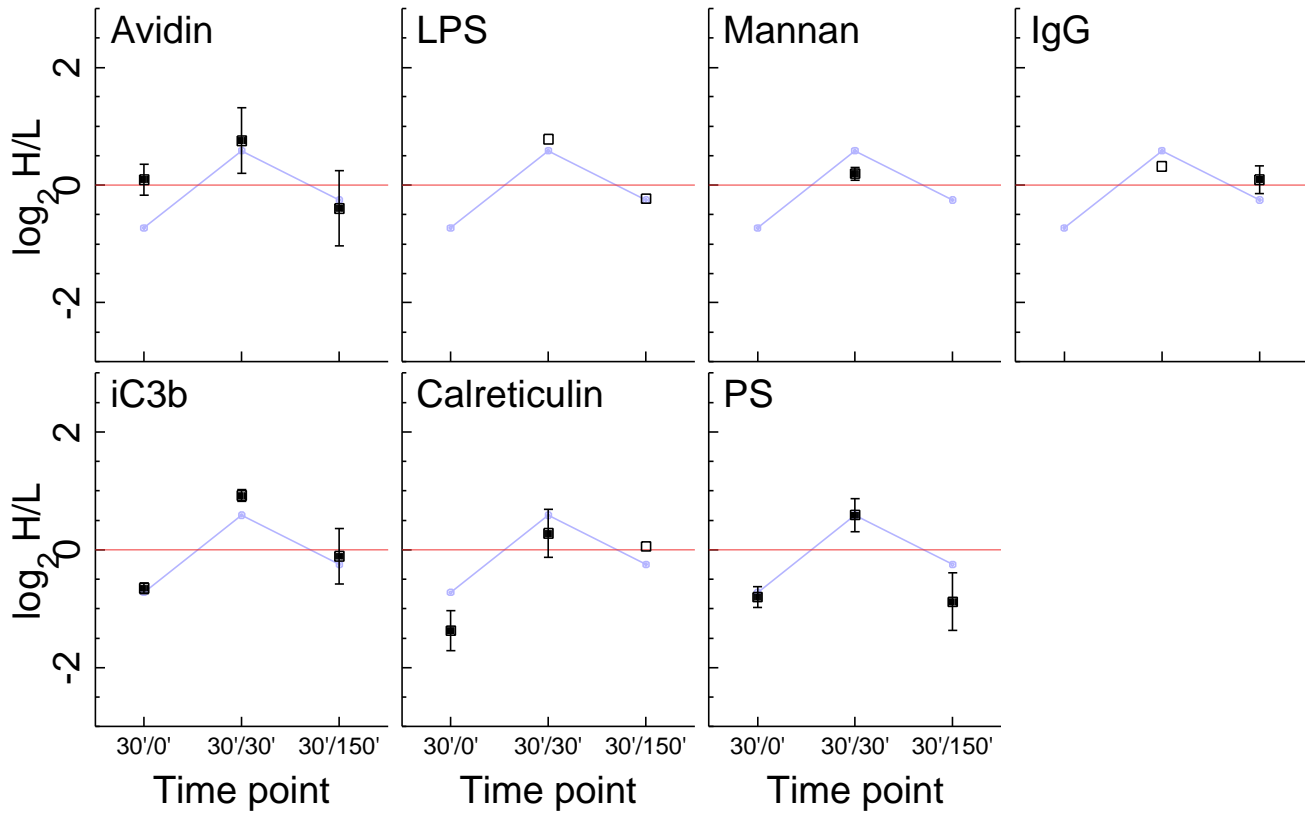

# htatip2 (Q9Z2G9)

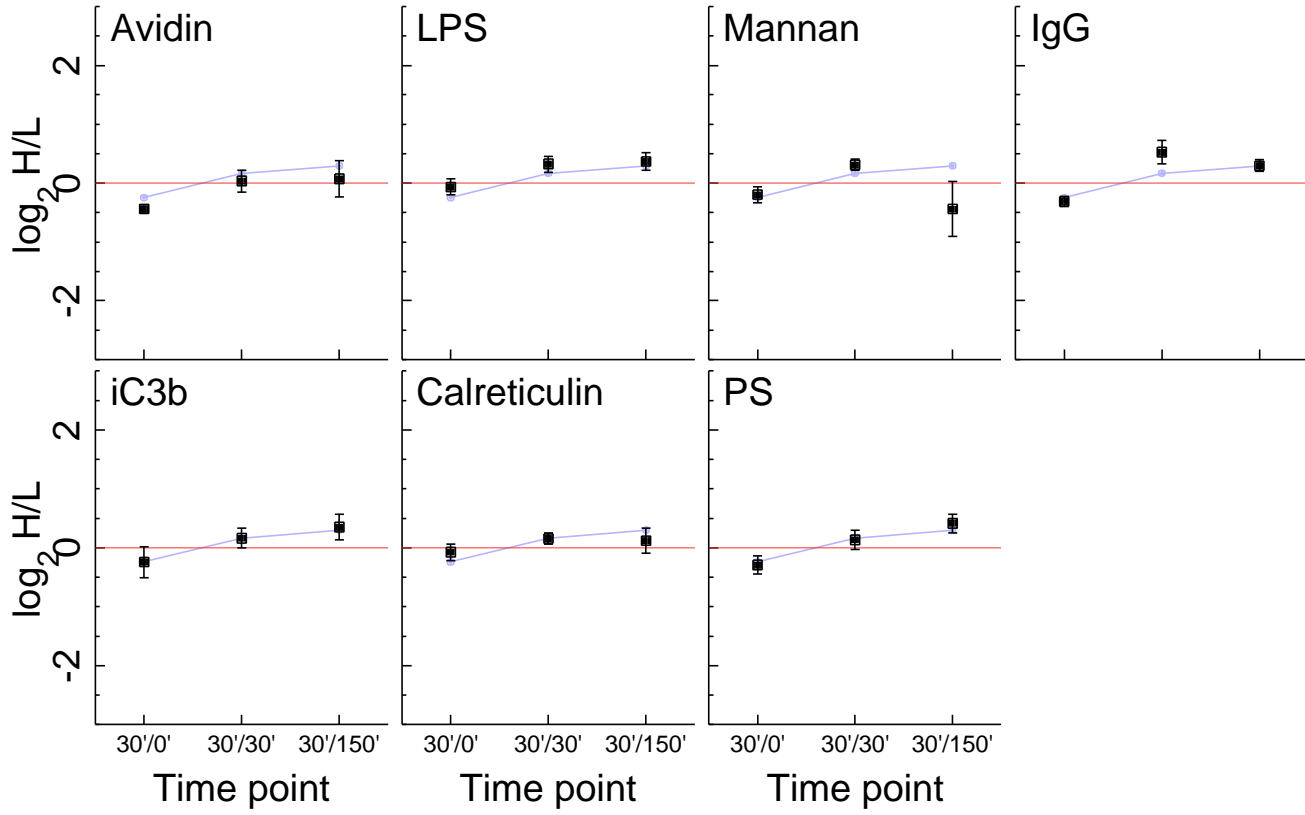

### hvcn1 (Q3U2S8)

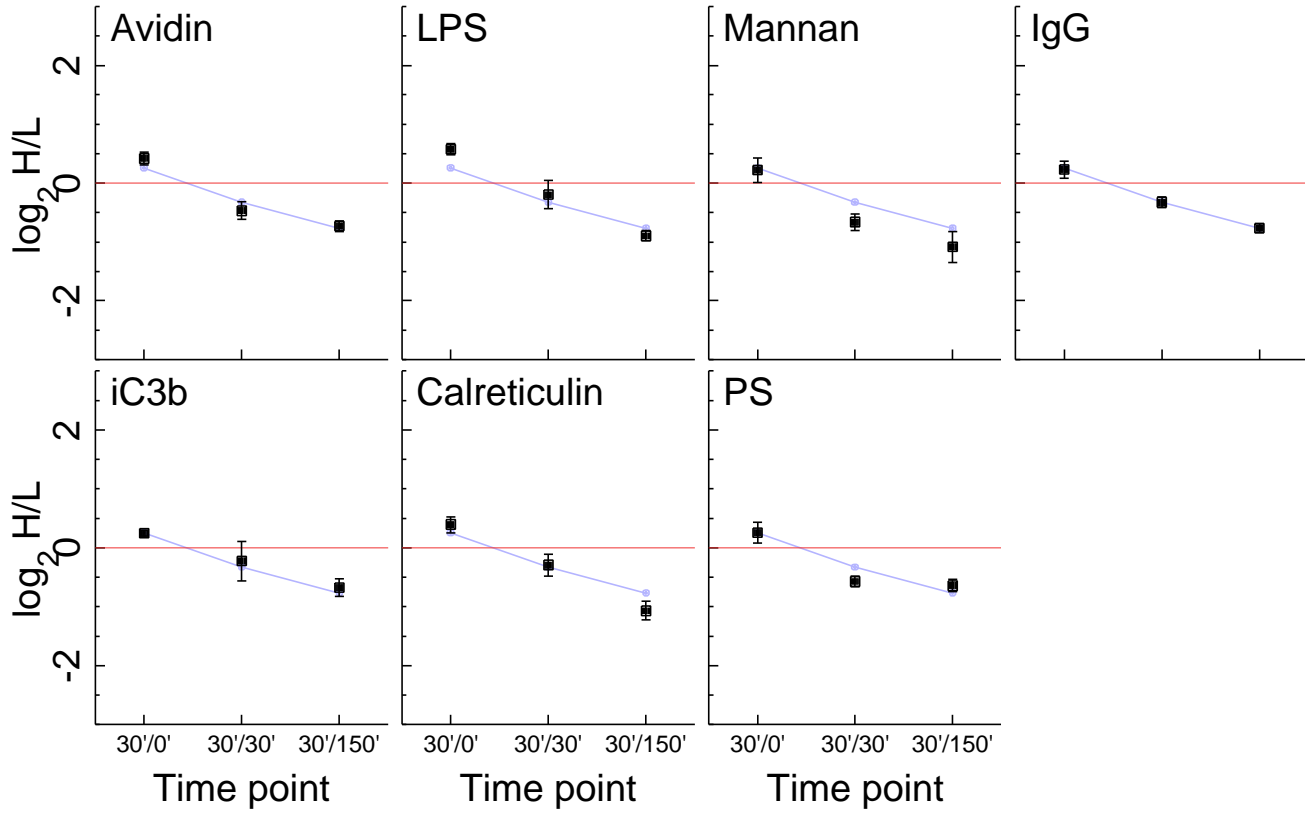

### hyal1 (Q91ZJ9)

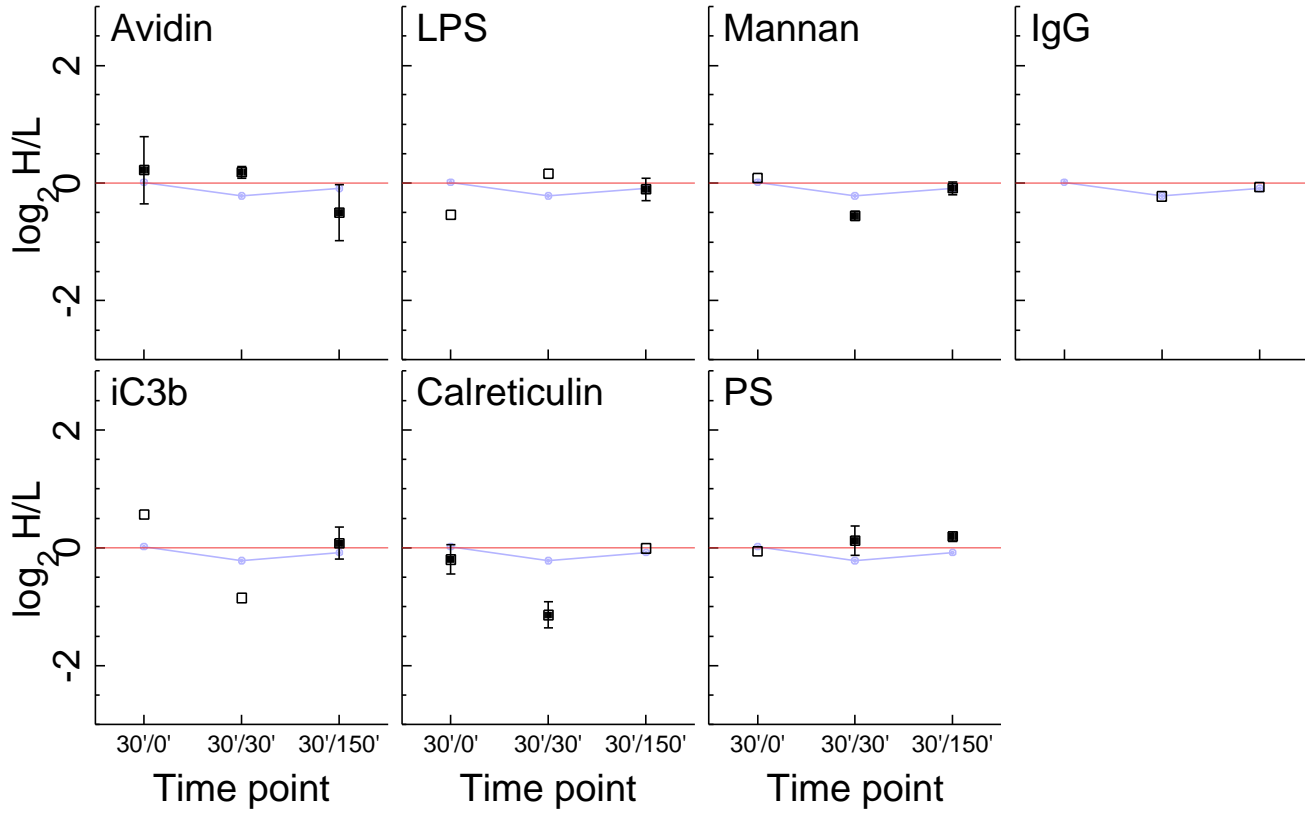

hyou1 (Q9JKR6)

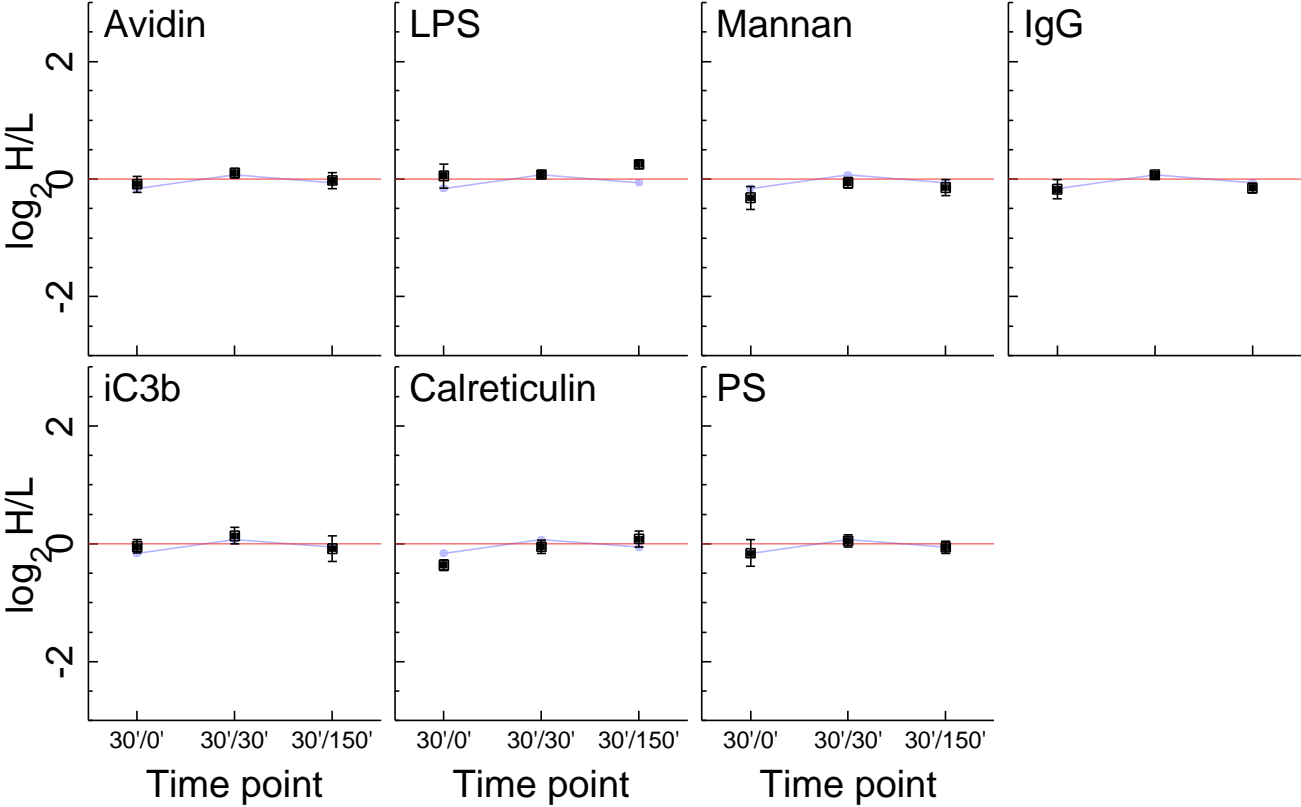

### icam1 (P13597)

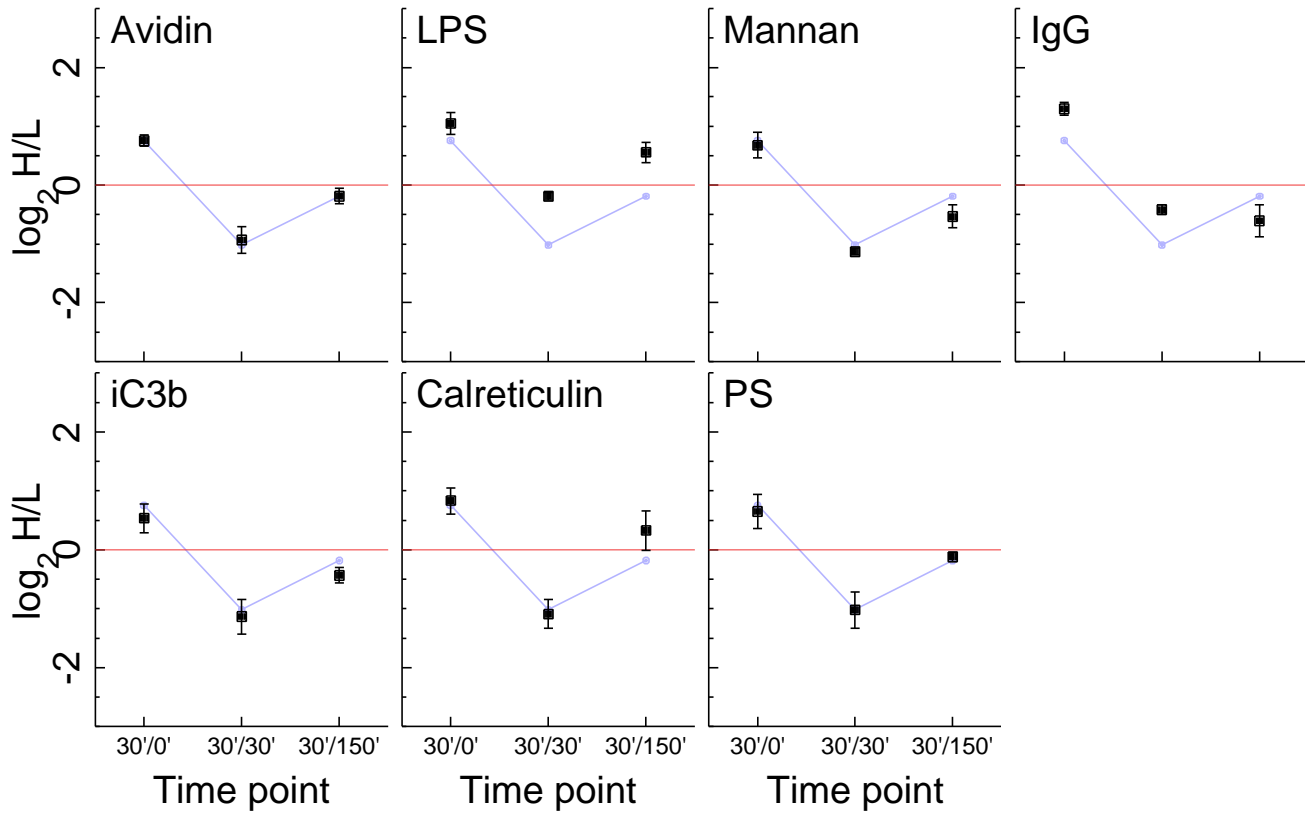

### idh1 (O88844)

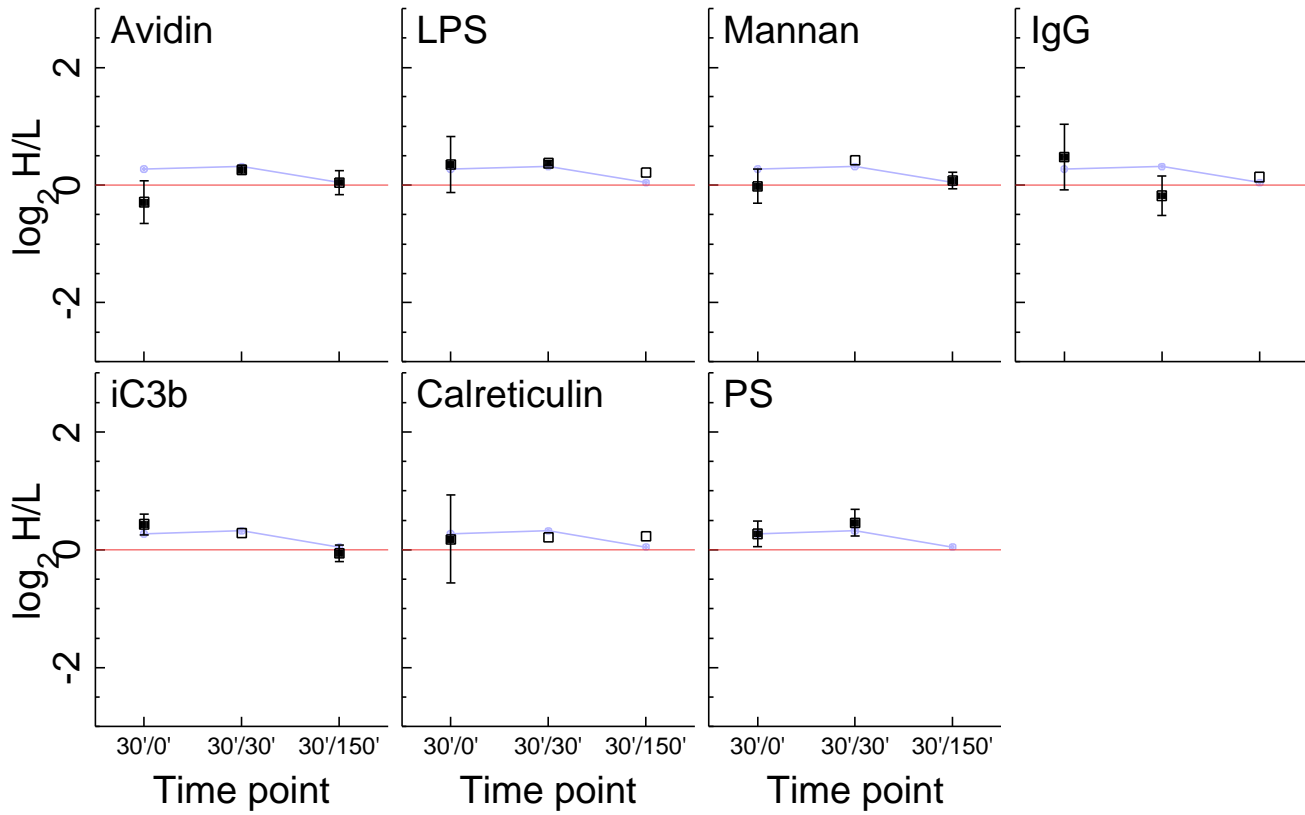

### idh2 (P54071)

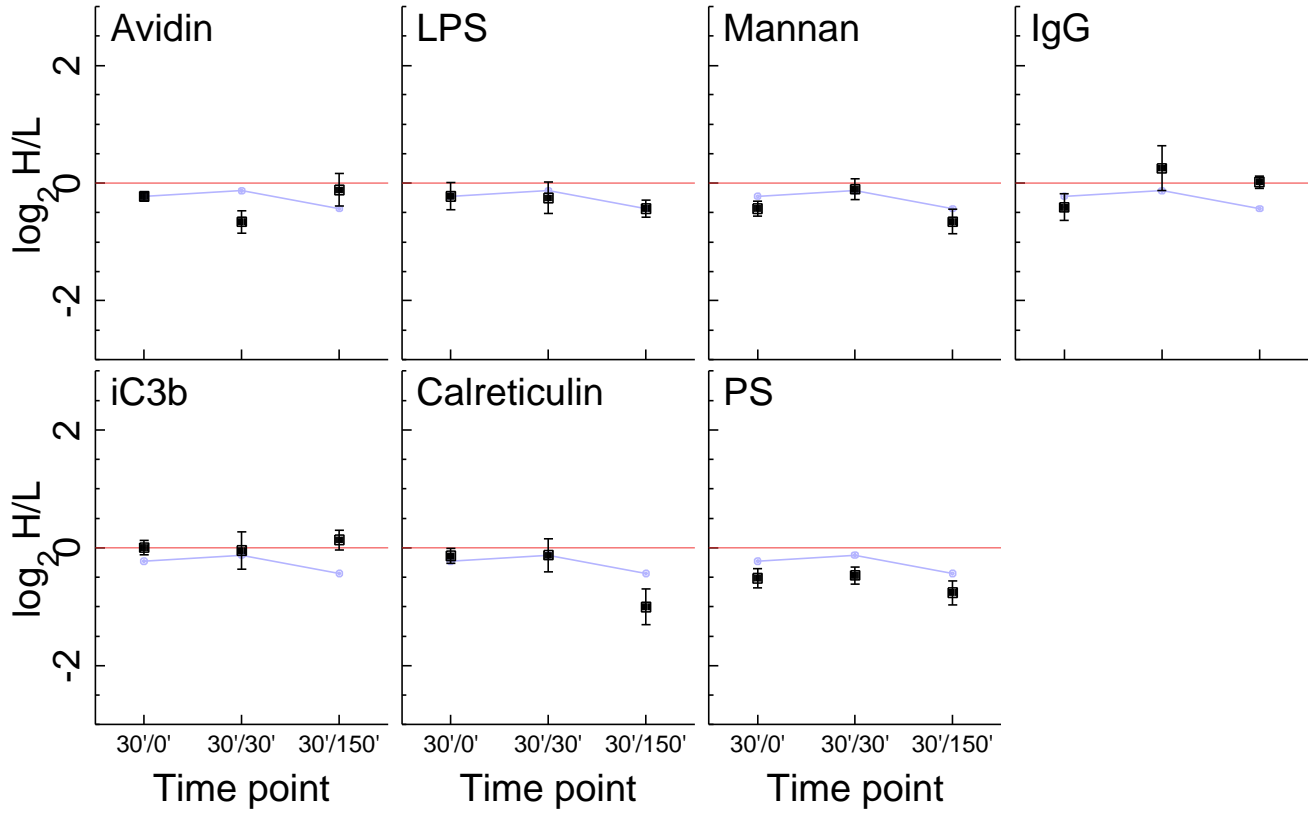



### idh3a (Q9D6R2)

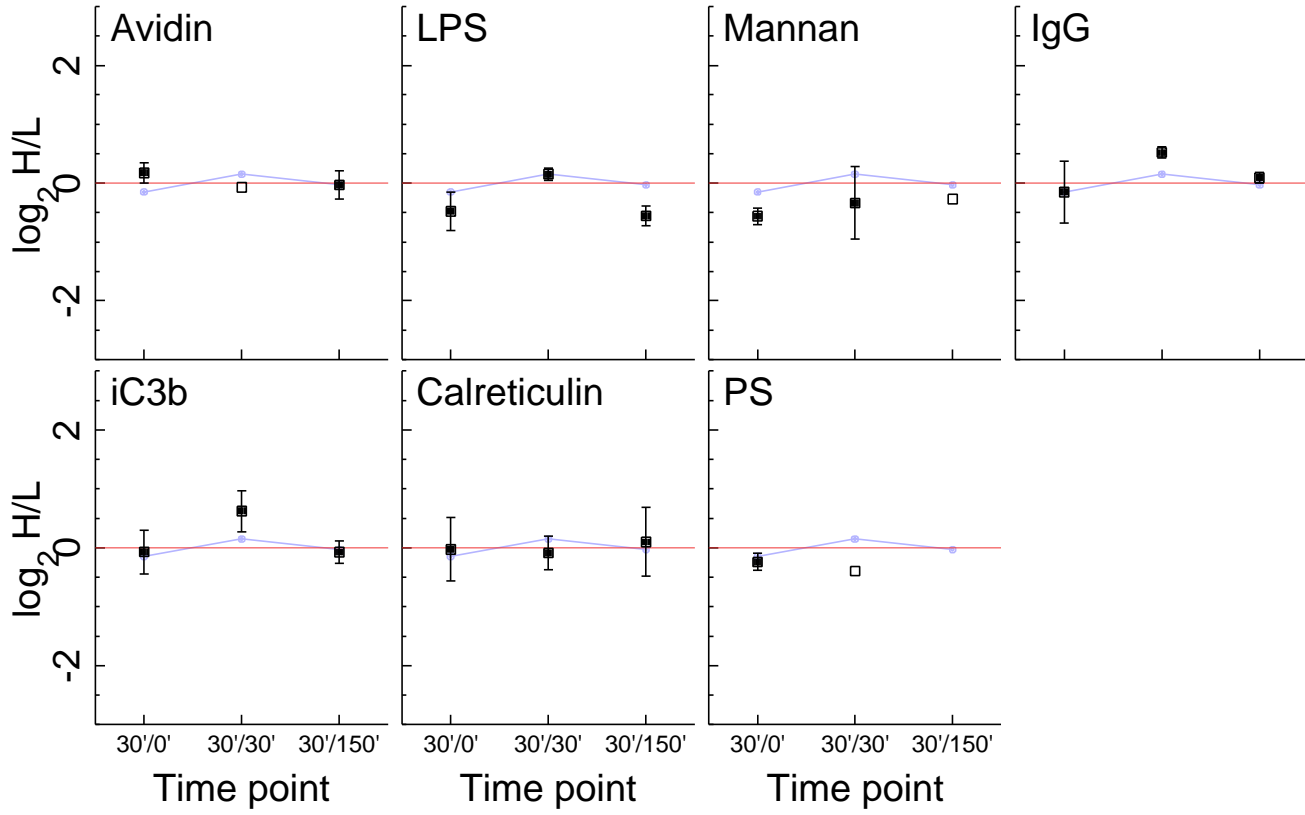

idh3b (Q91VA7)

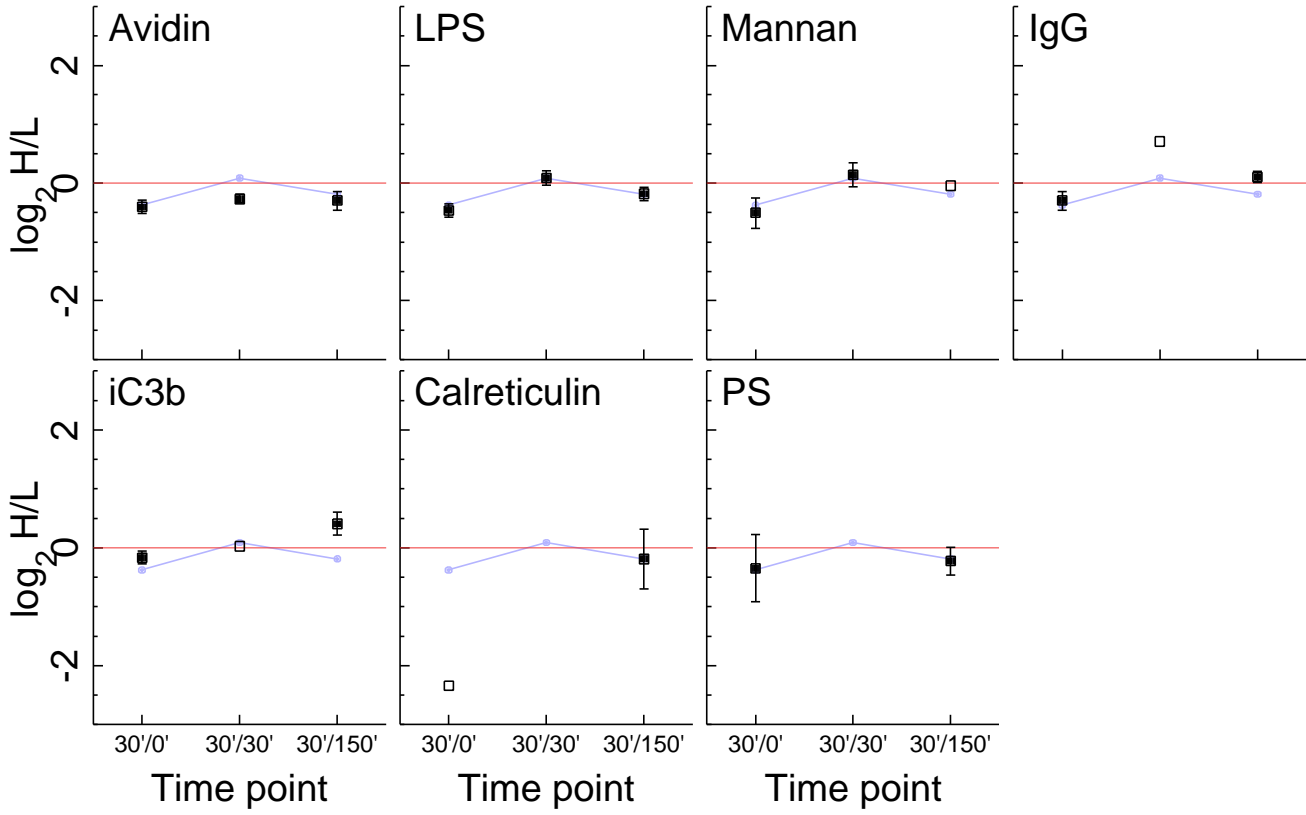

idh3g (P70404)

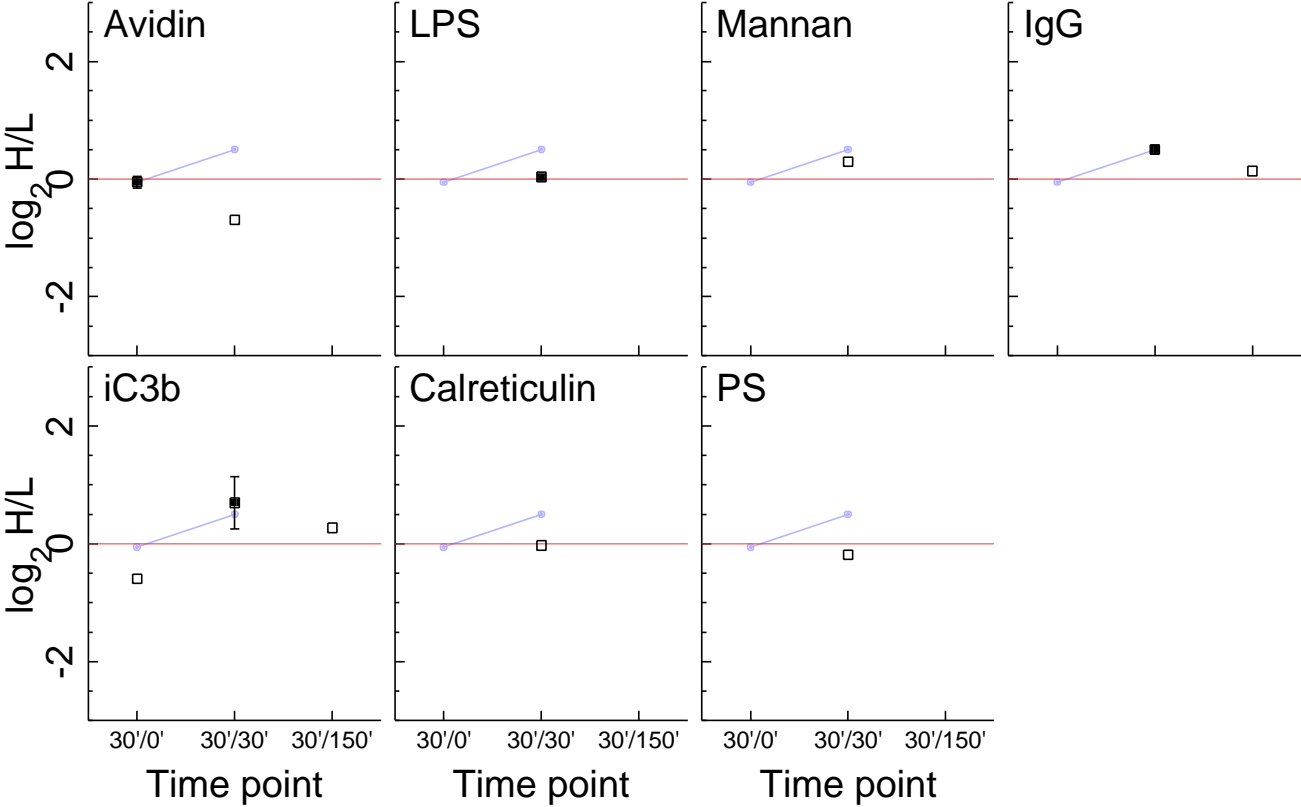

ids (Q08890)

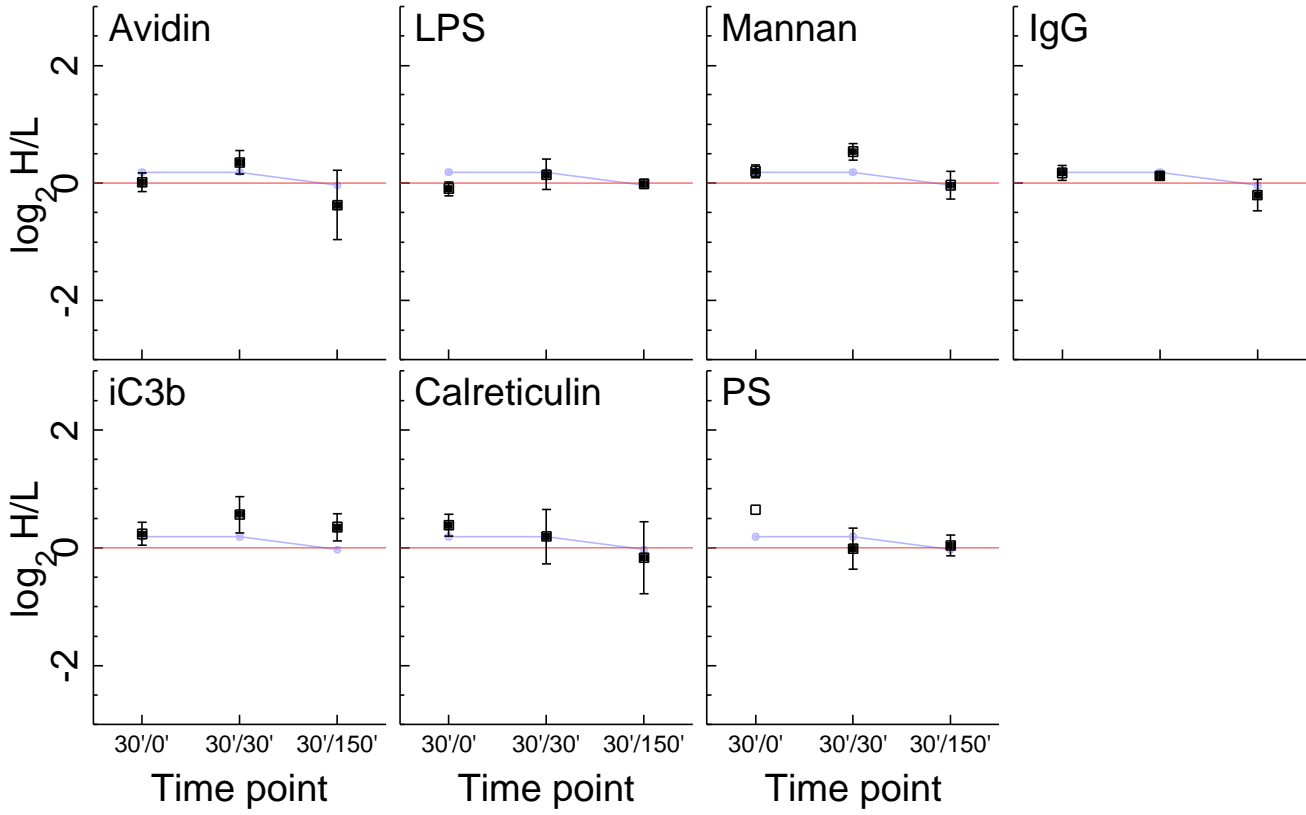

idua (Q8BMG0)

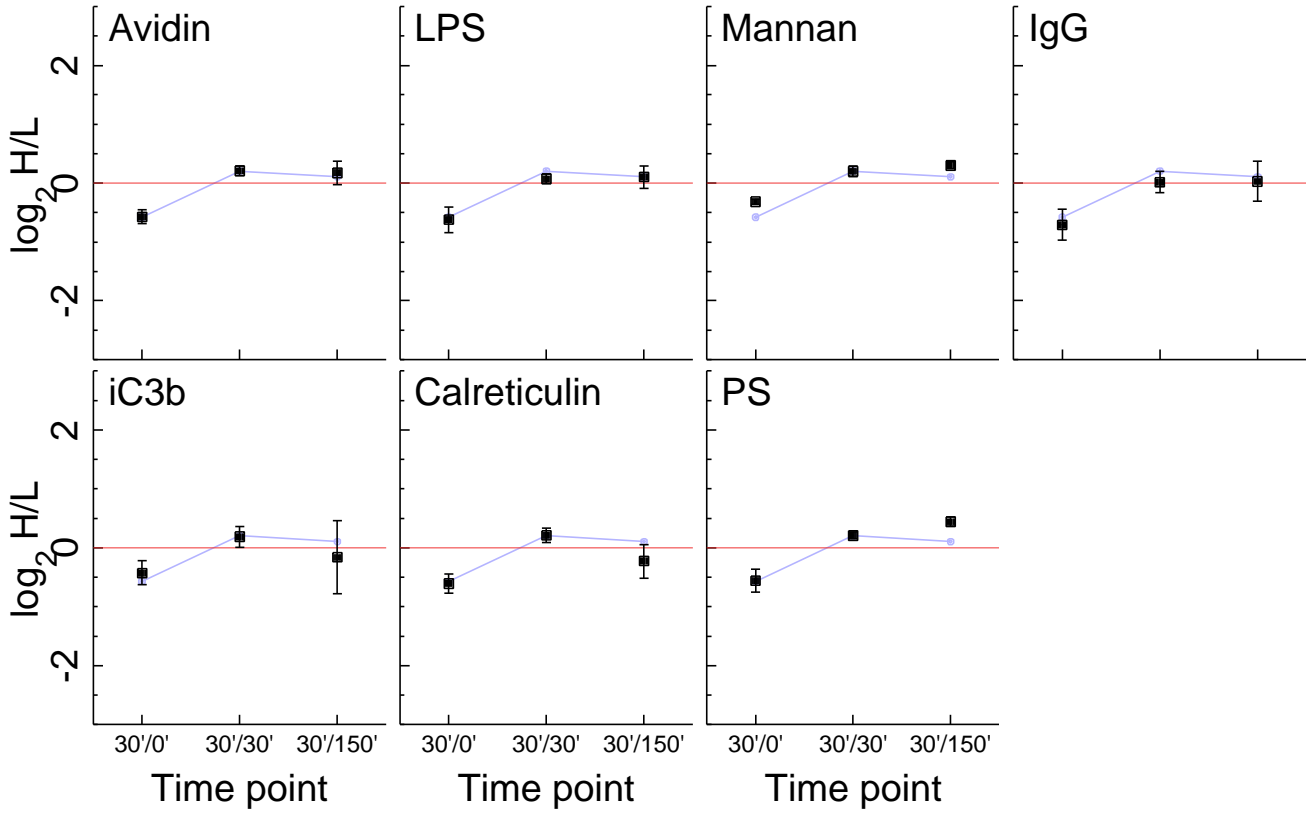

### ifi204 (E9QKL6)

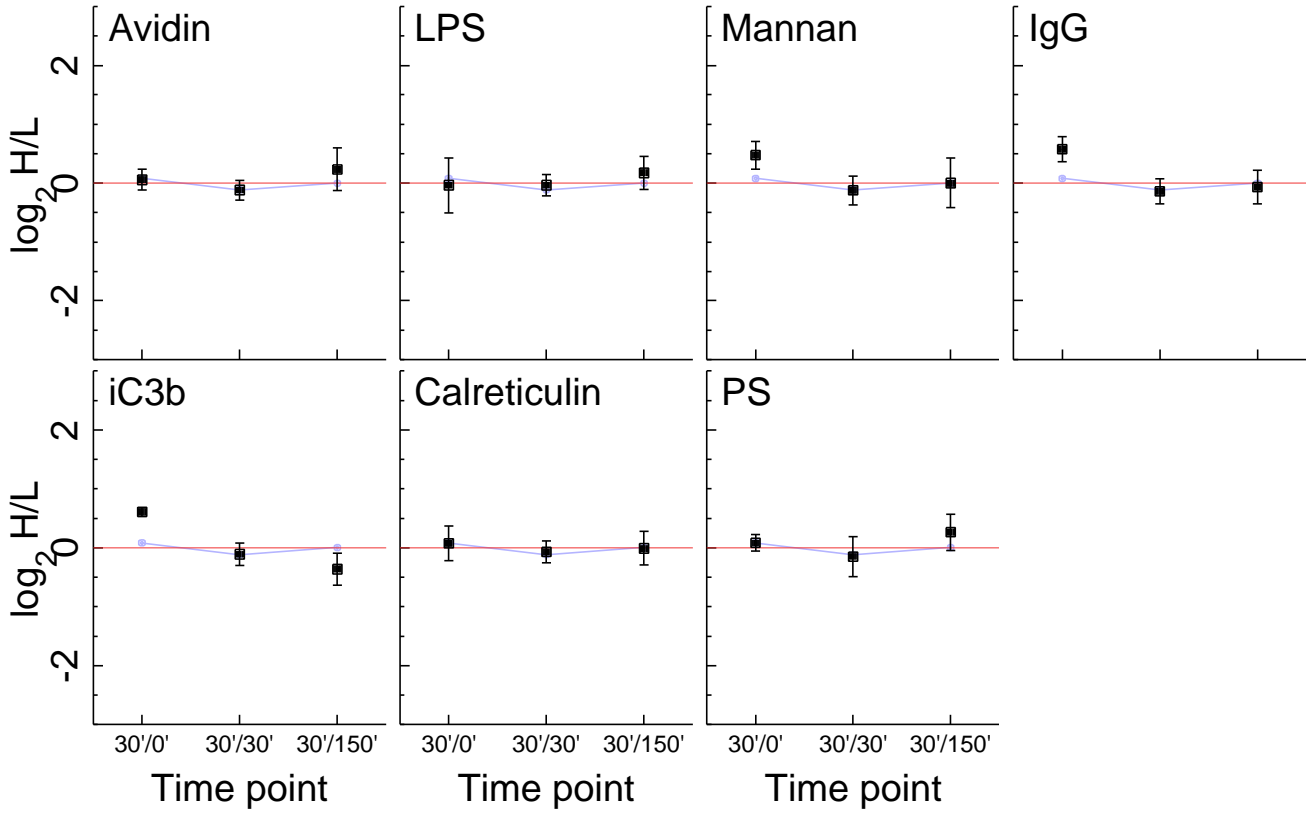

### ifi205b (Q08619)

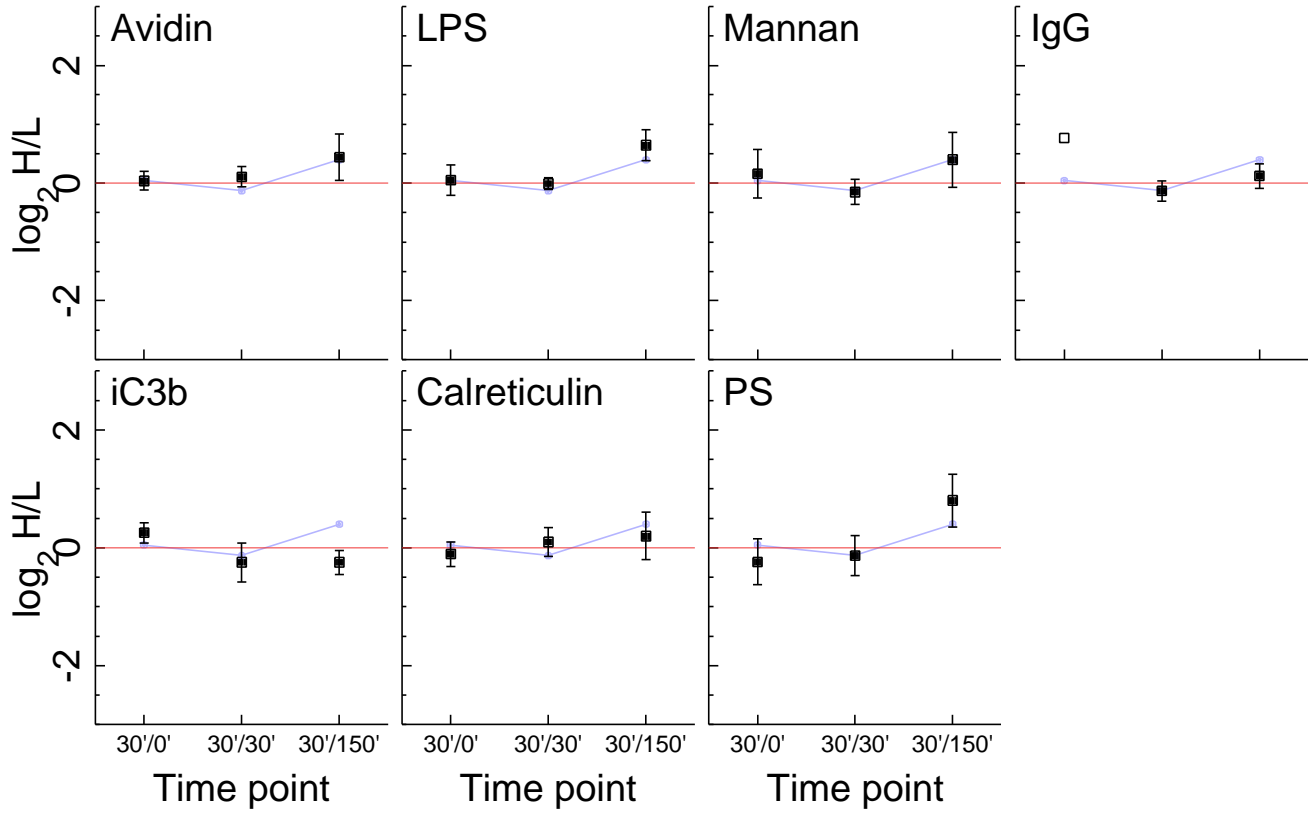

### ifi30 (Q9ESY9)

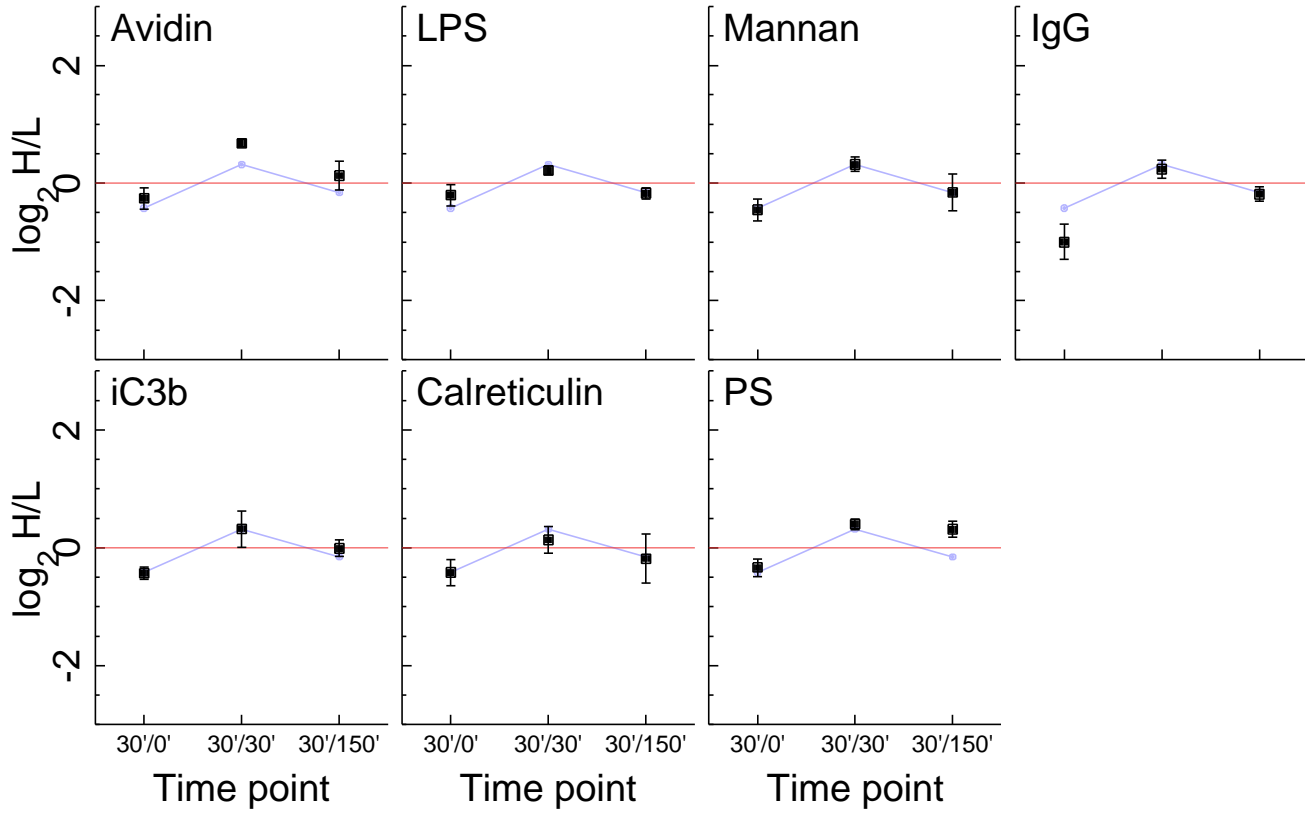



### ifi35 (Q9D8C4)

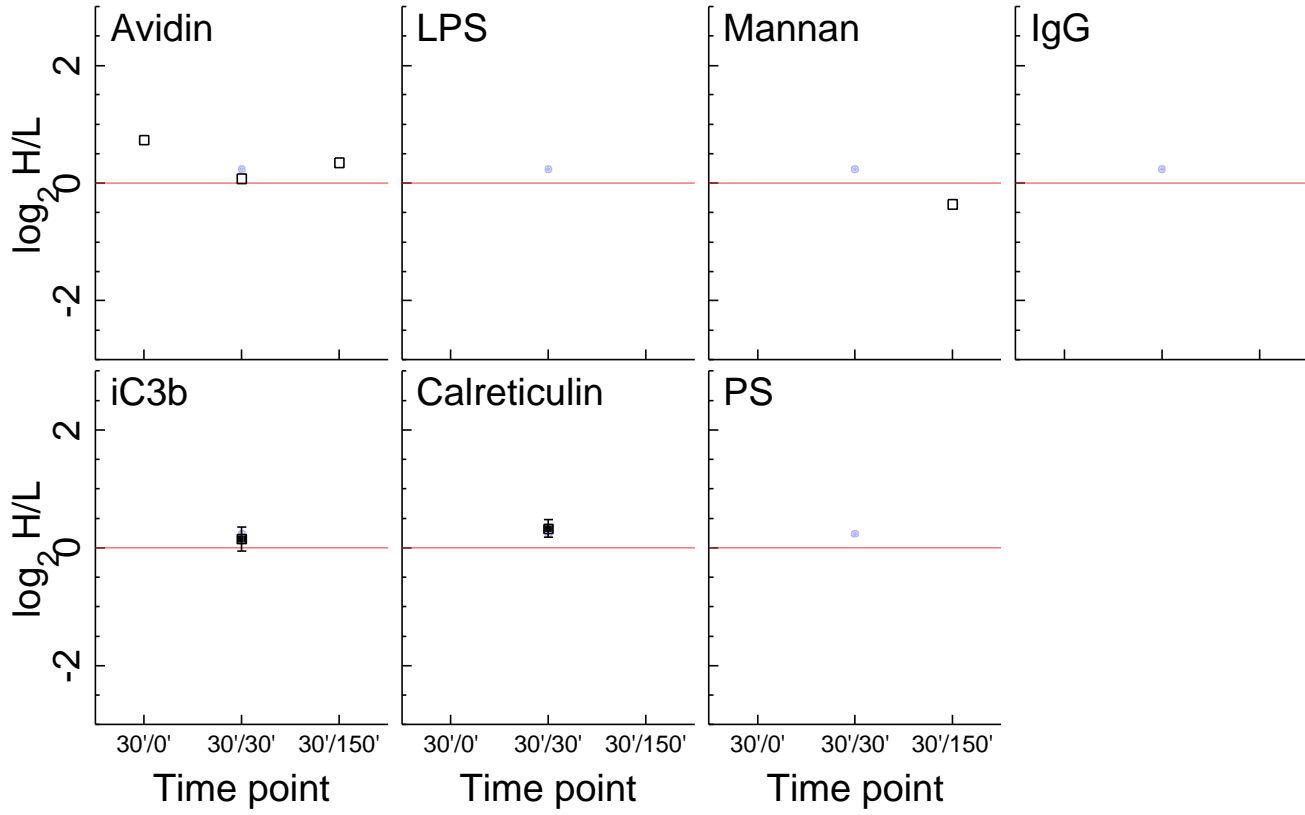

### ifit1 (Q64282)

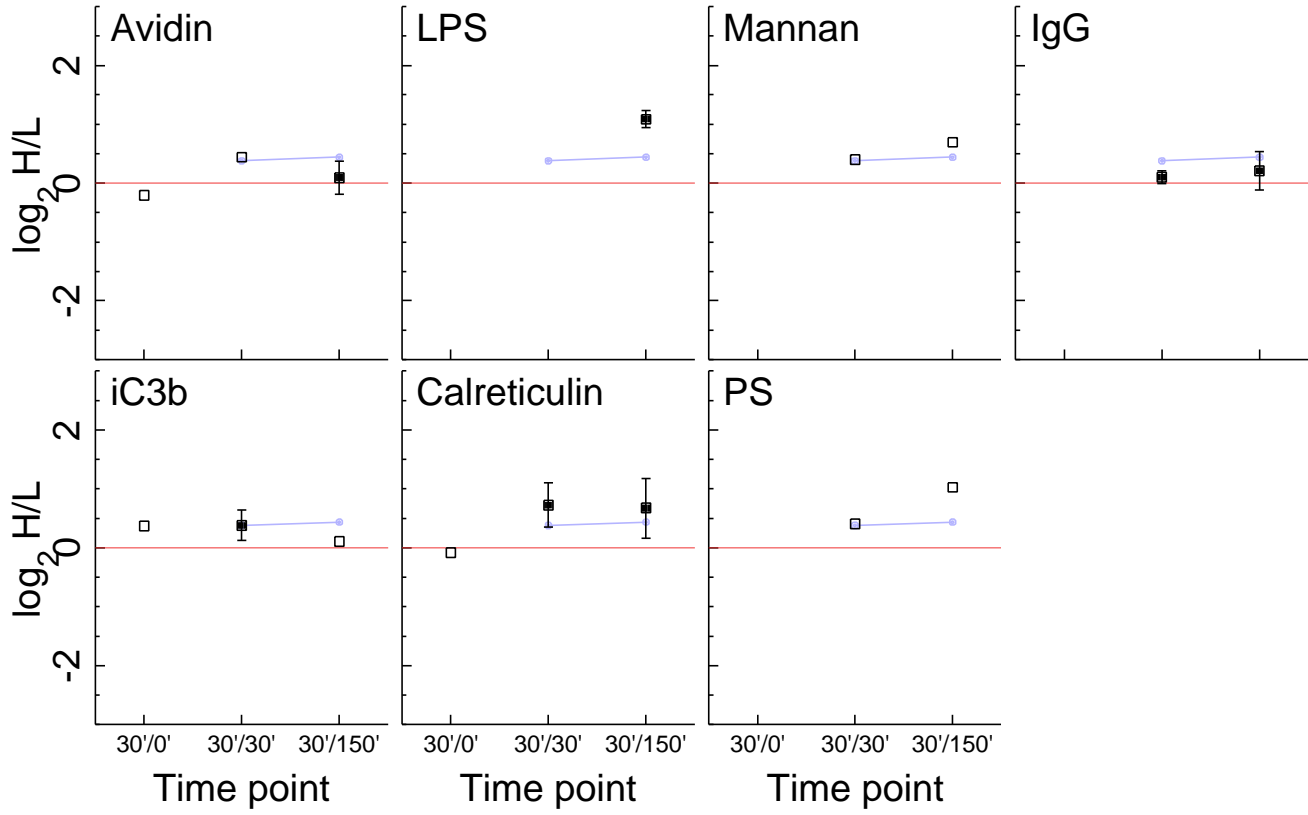

ifitm2 (Q99J93)

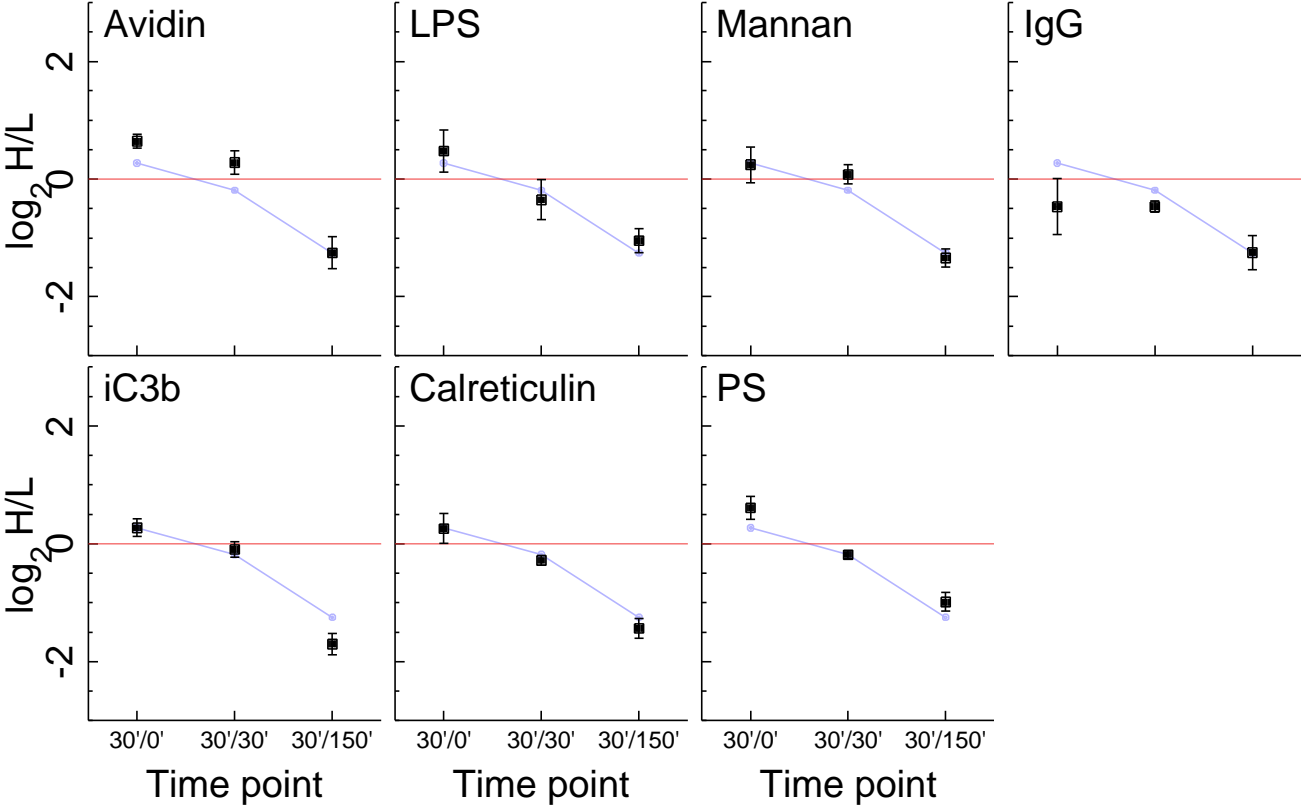

### ifitm3 (Q9CQW9)

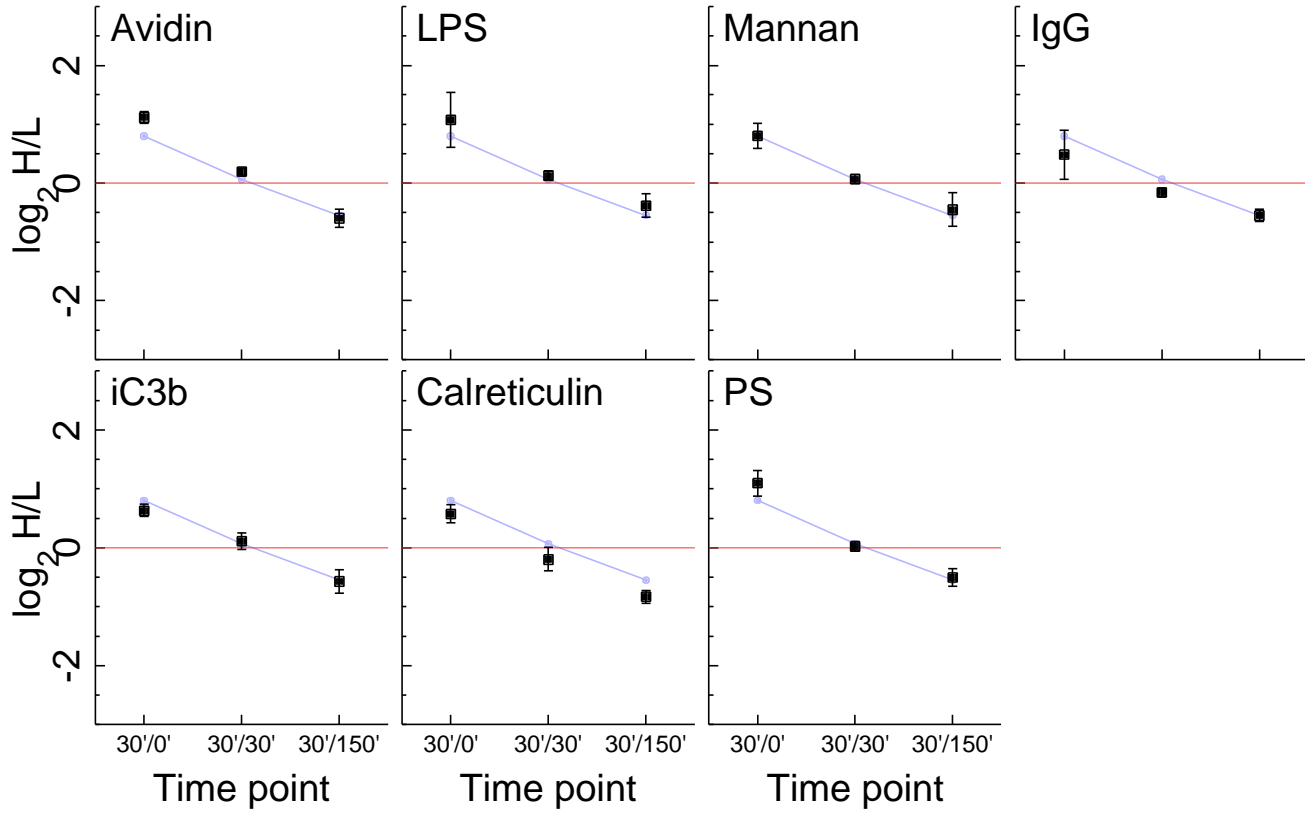

### ifngr1 (P15261)

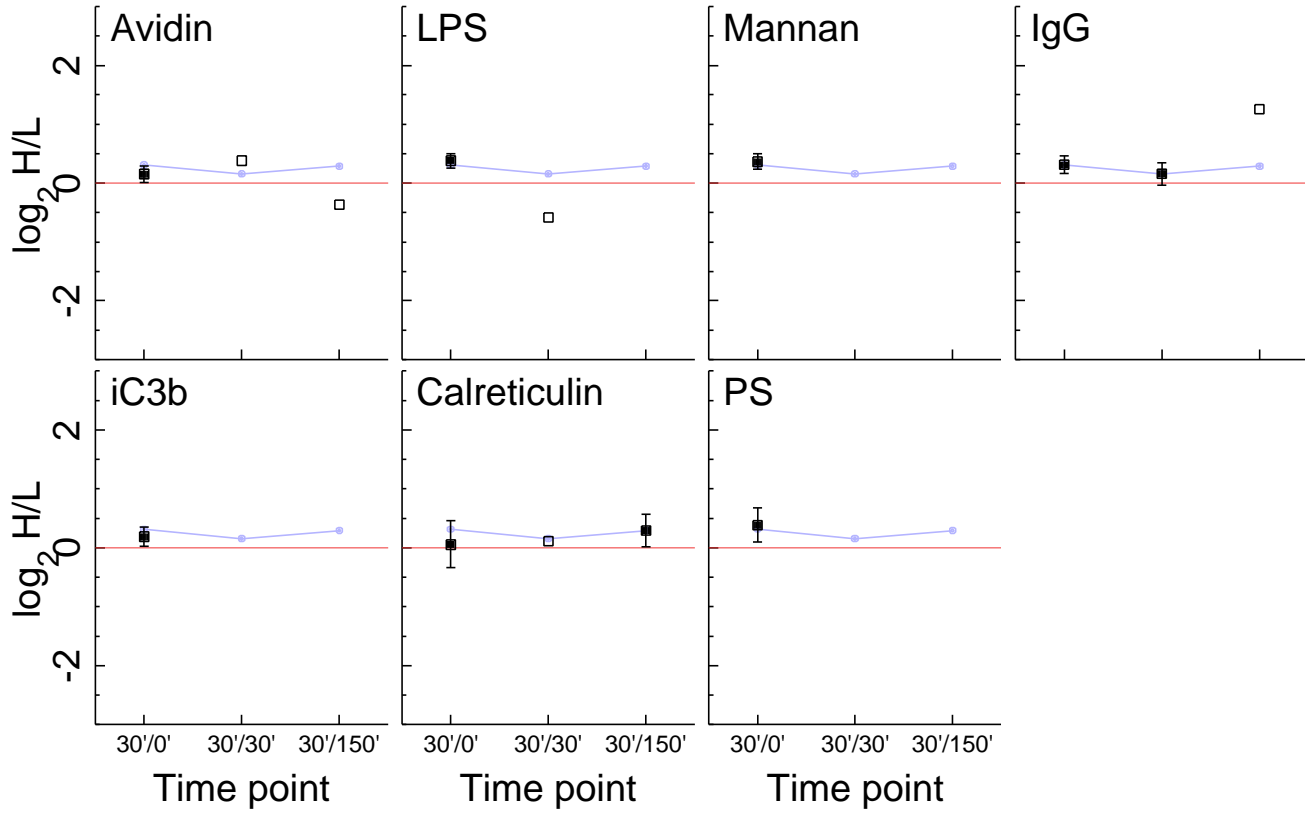

### igbp1 (Q61249)

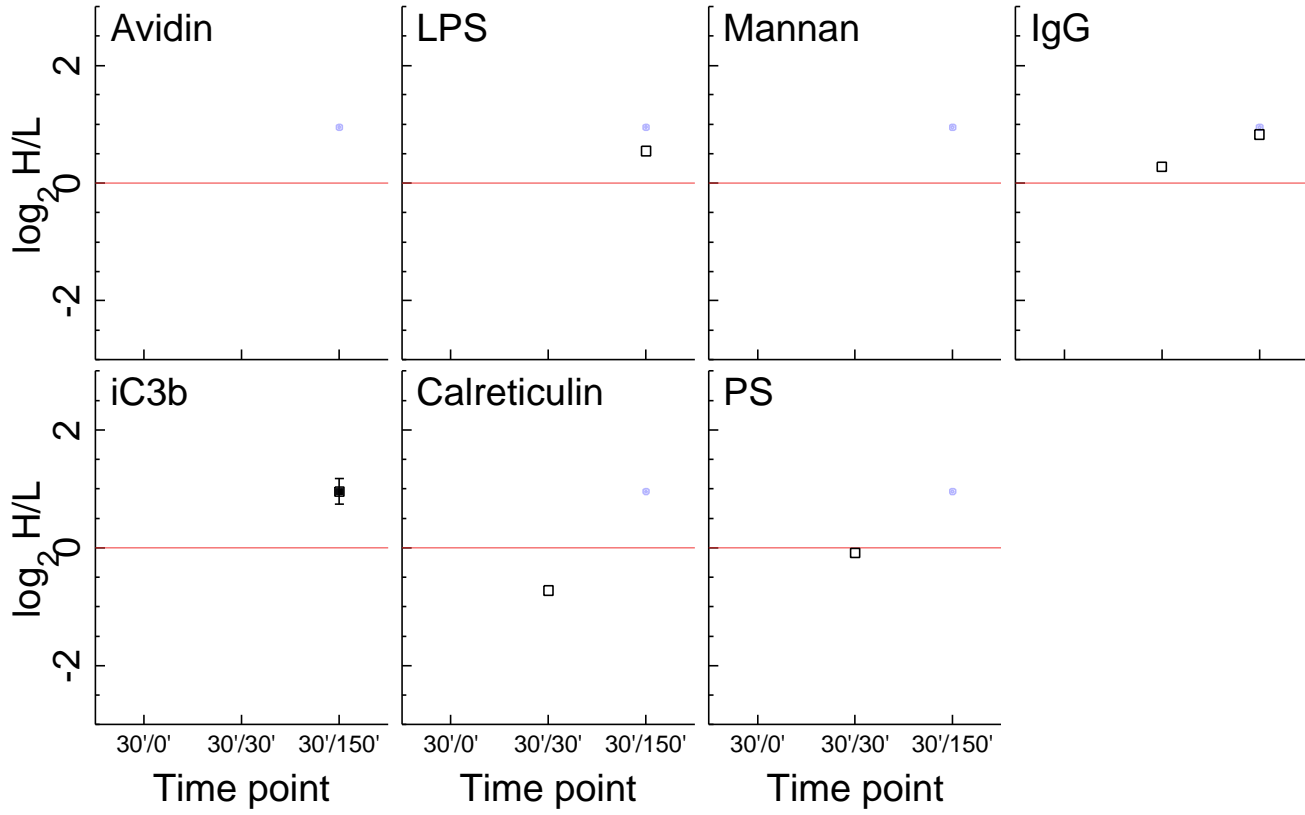

### igf2r (Q07113)

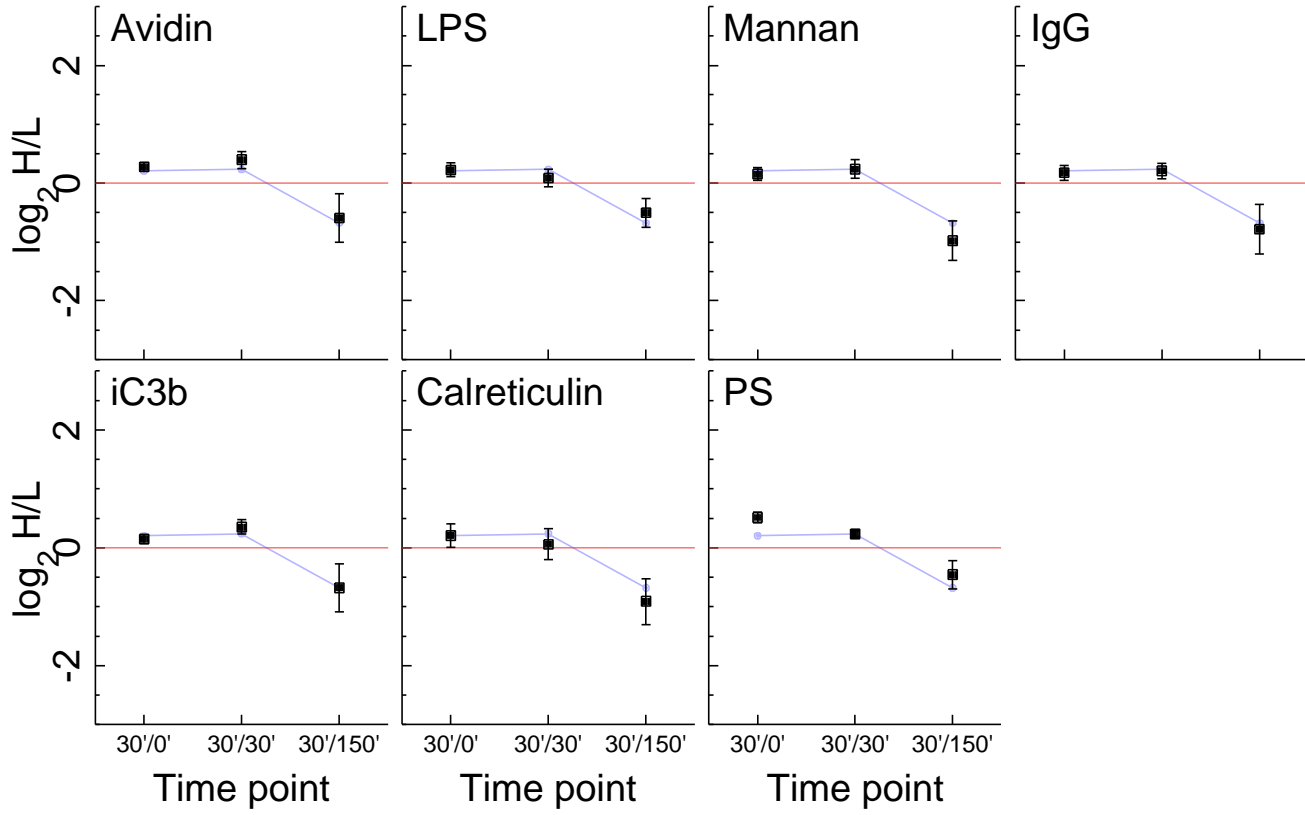

### igsf6 (P0C6B7)

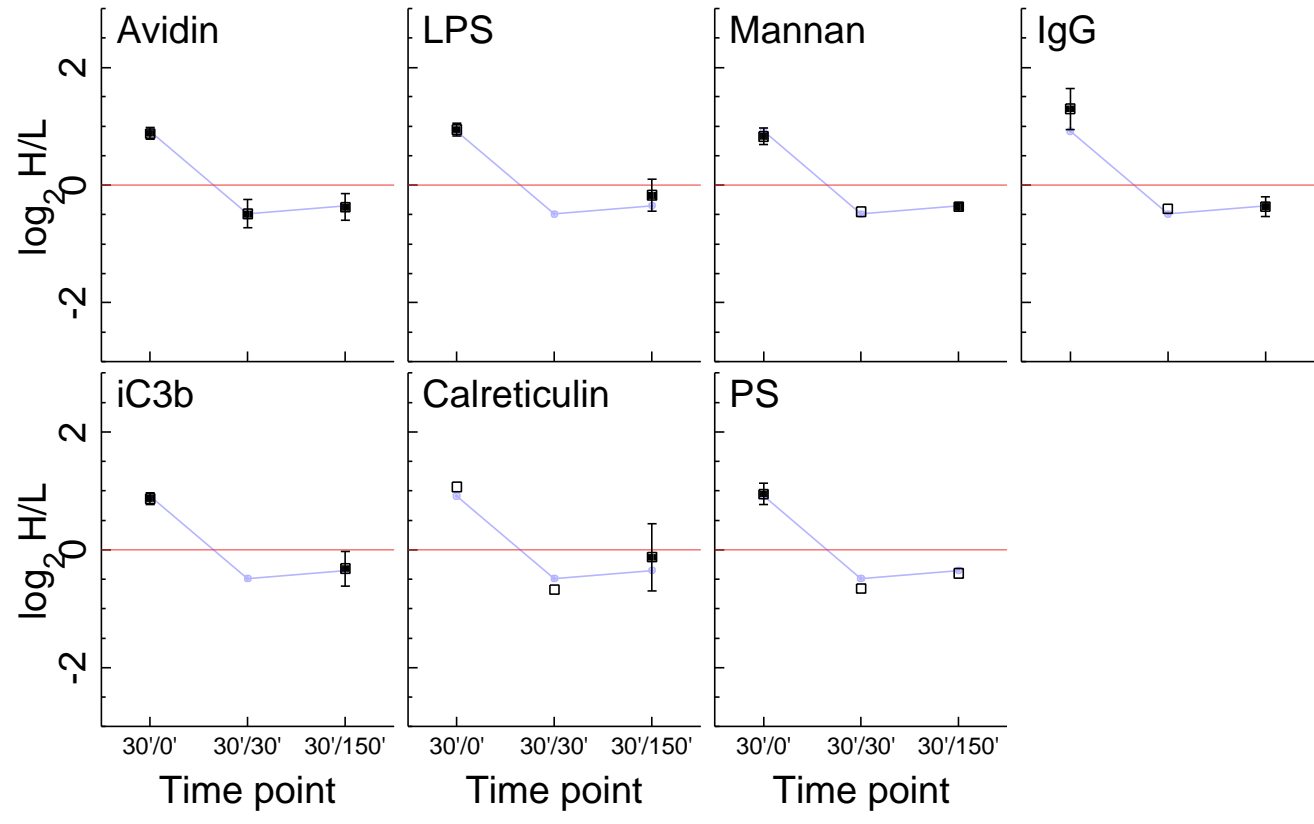



### igtp (Q9DCE9)

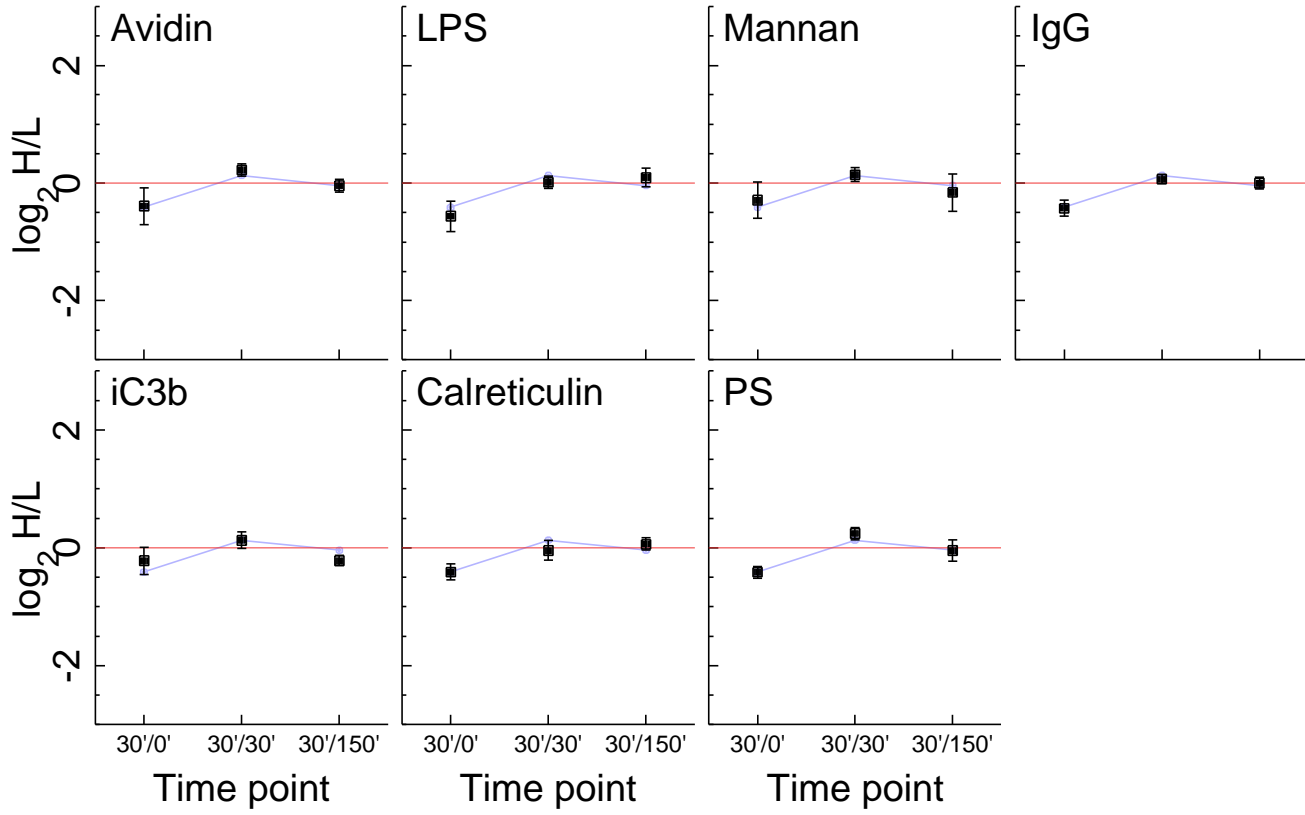

### il16 (O54824)

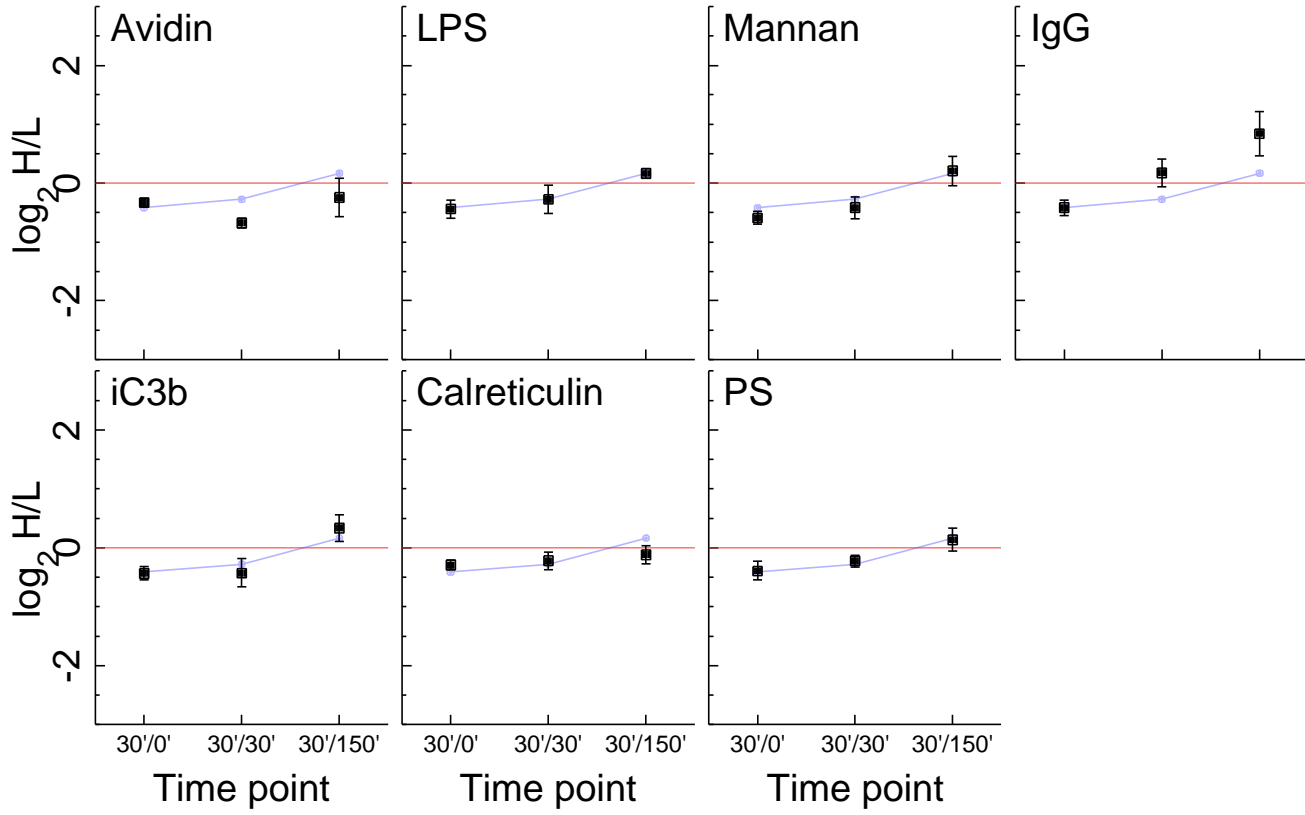

ilk (O55222)

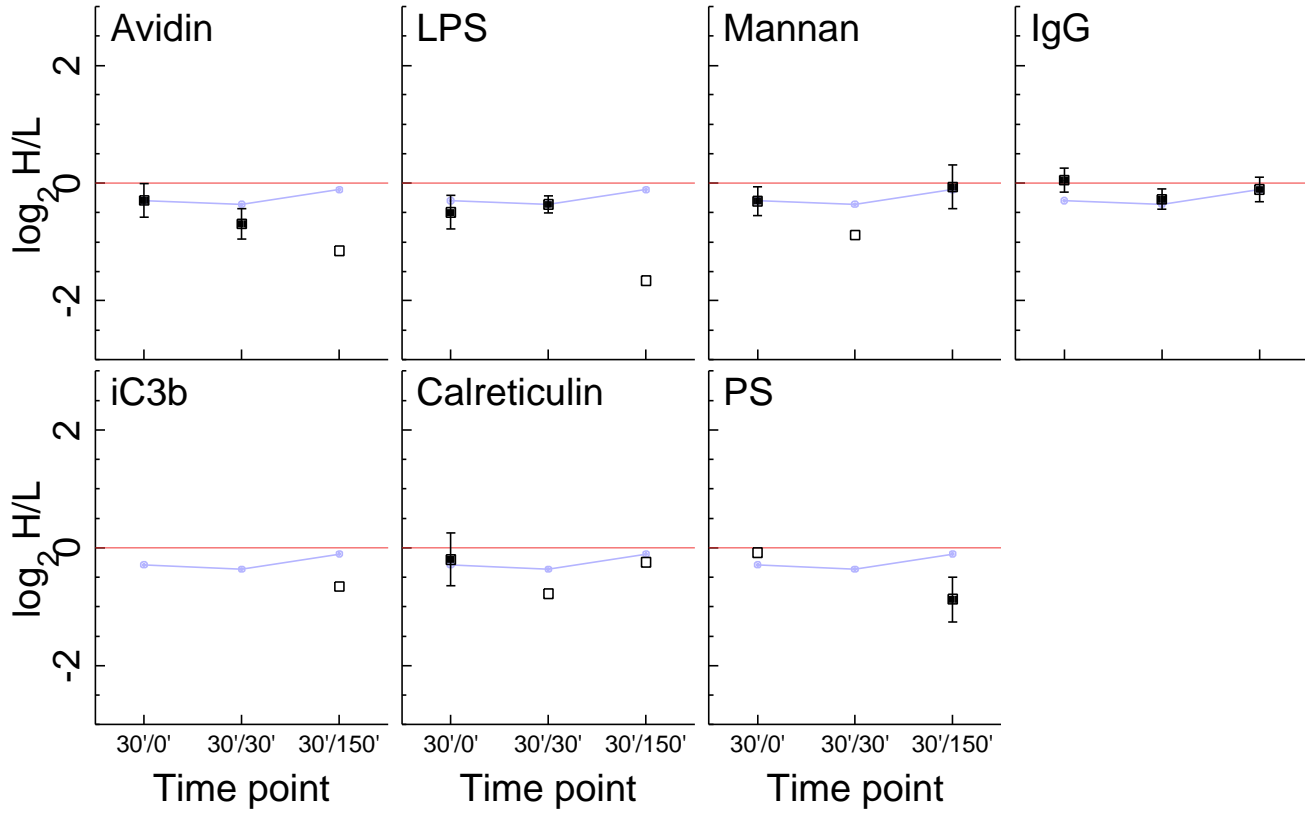

ilvbl (Q8BU33)

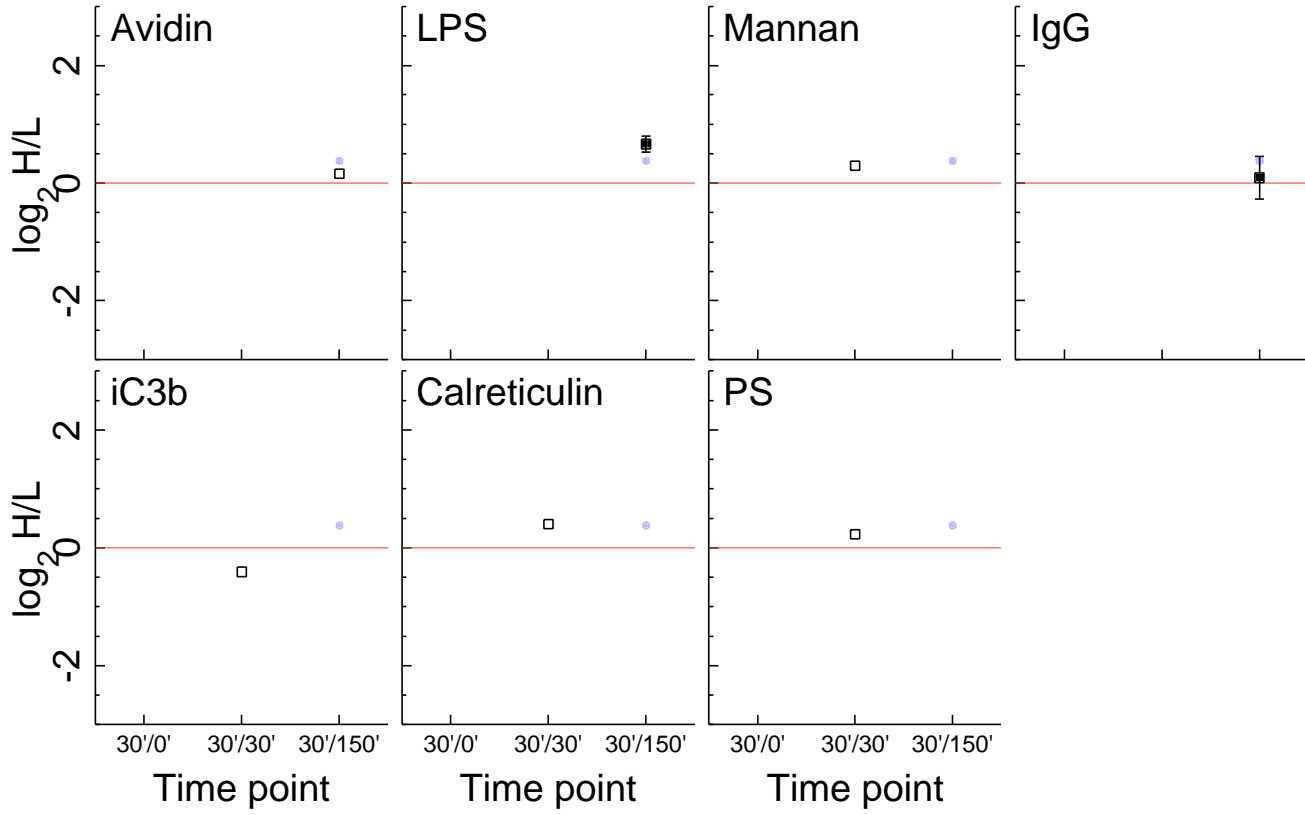

### inf2 (E9QLA5)

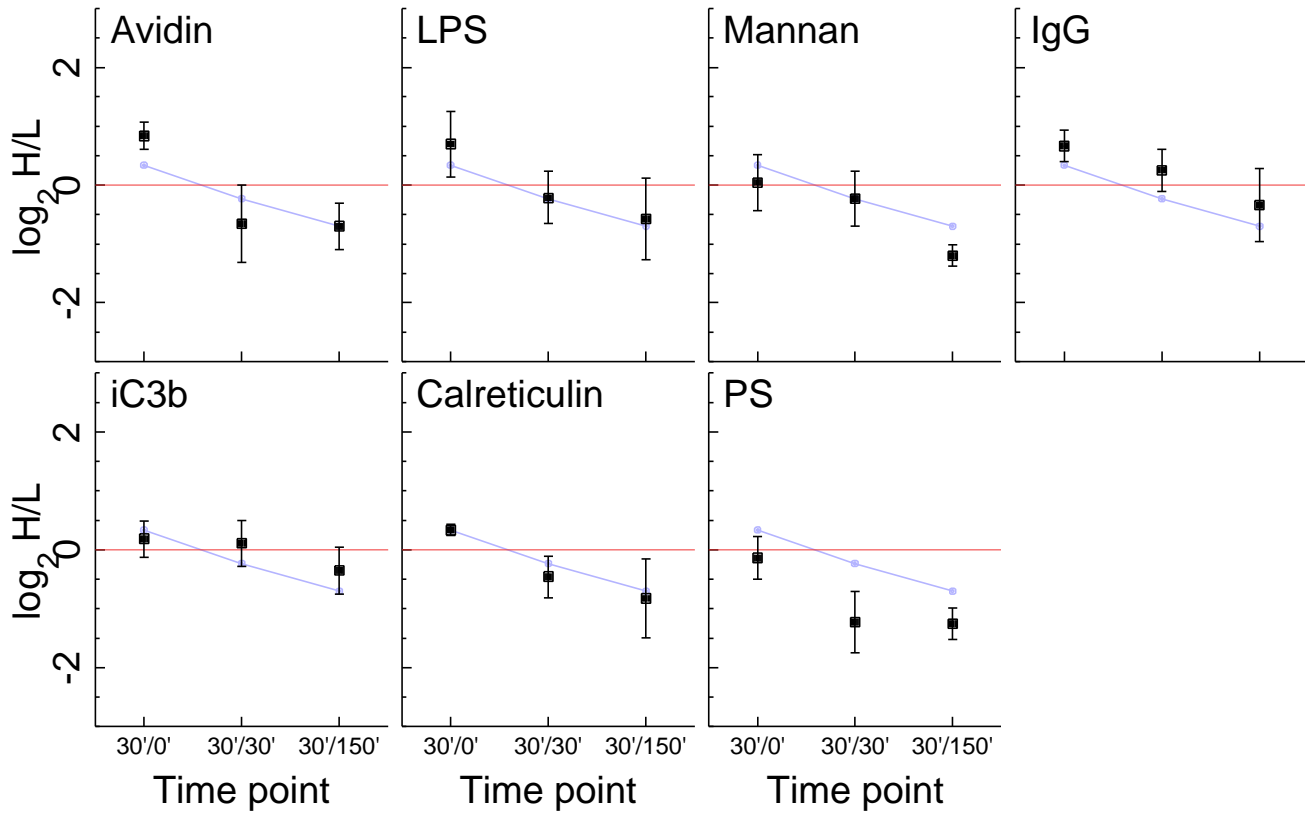

inpp5d (Q9ES52)

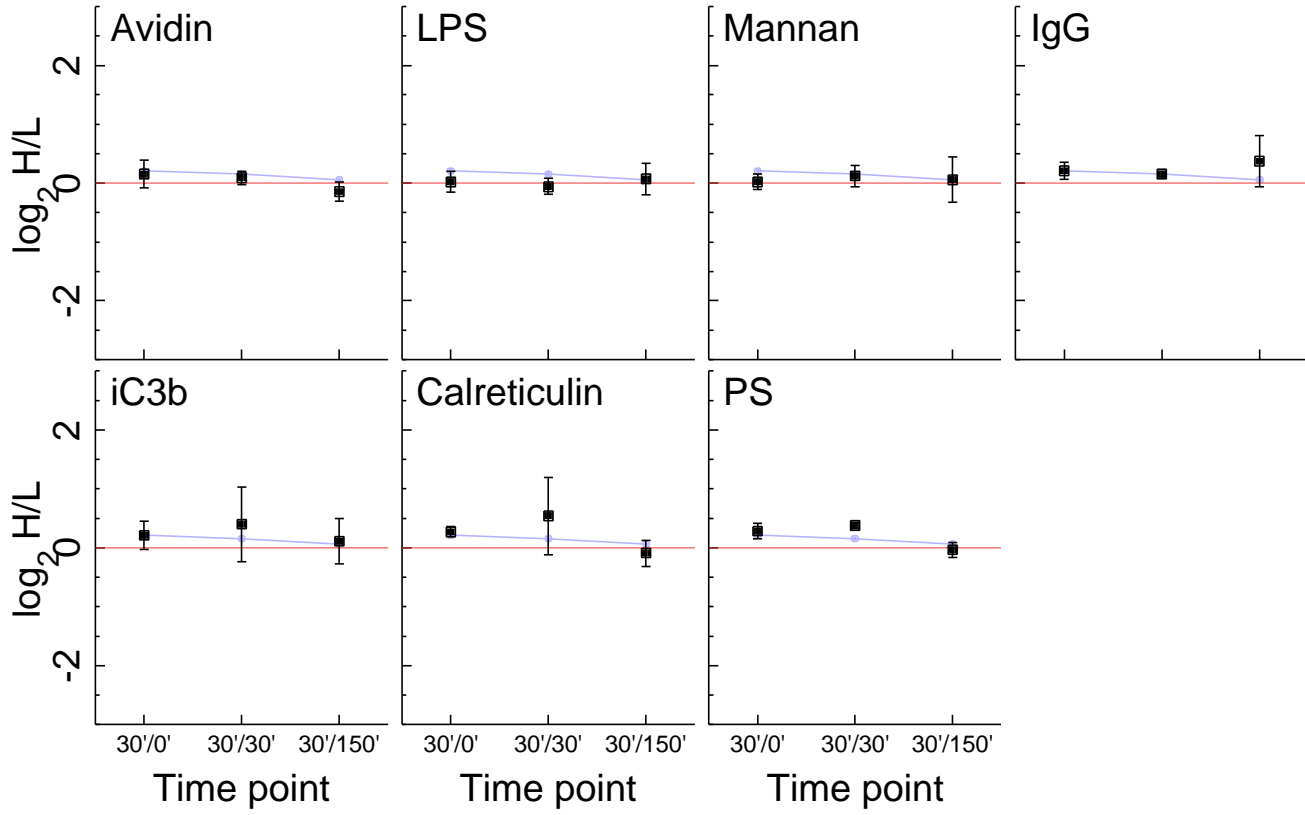

### iqgap1 (Q9JKF1)

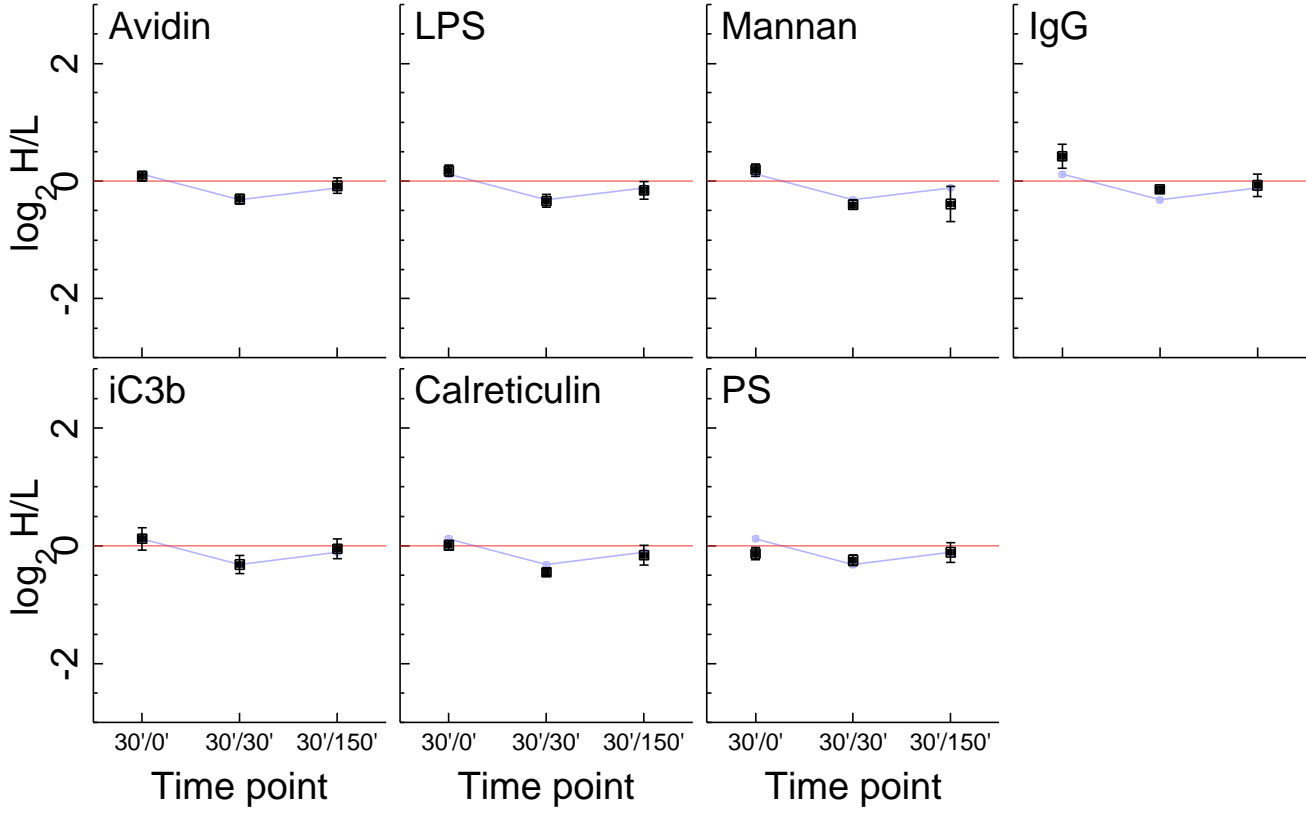

### iqgap2 (Q3UQ44)

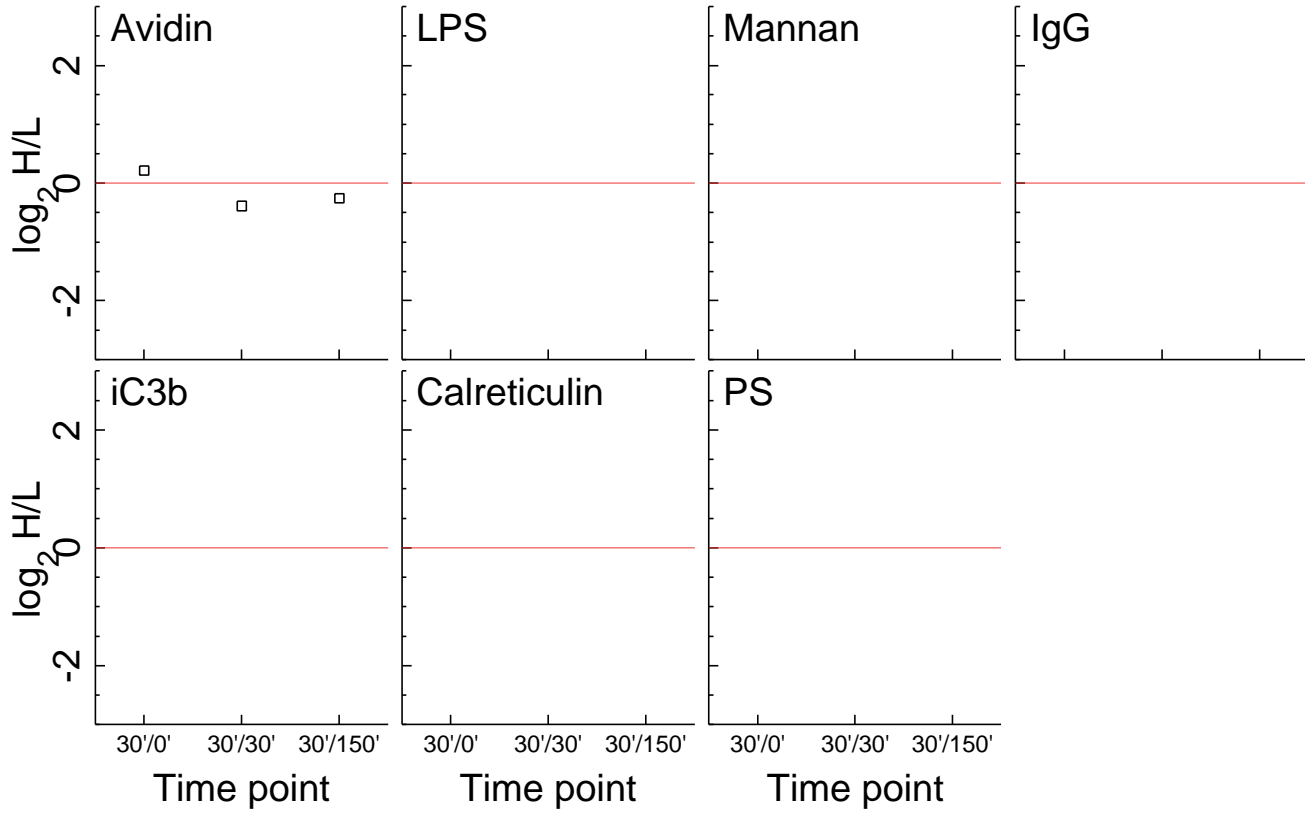



irf2bp2 (E9Q1P8)

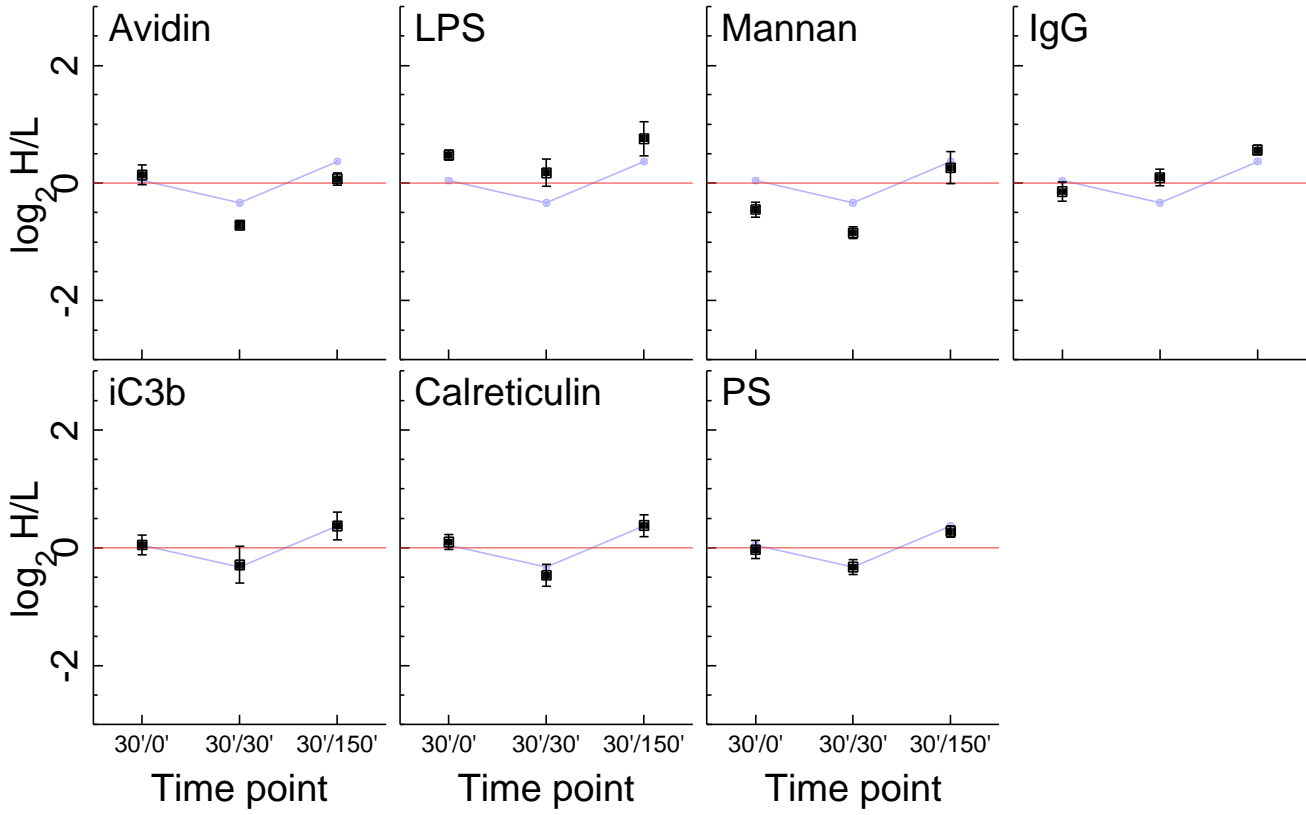

### irgm1 (Q60766)

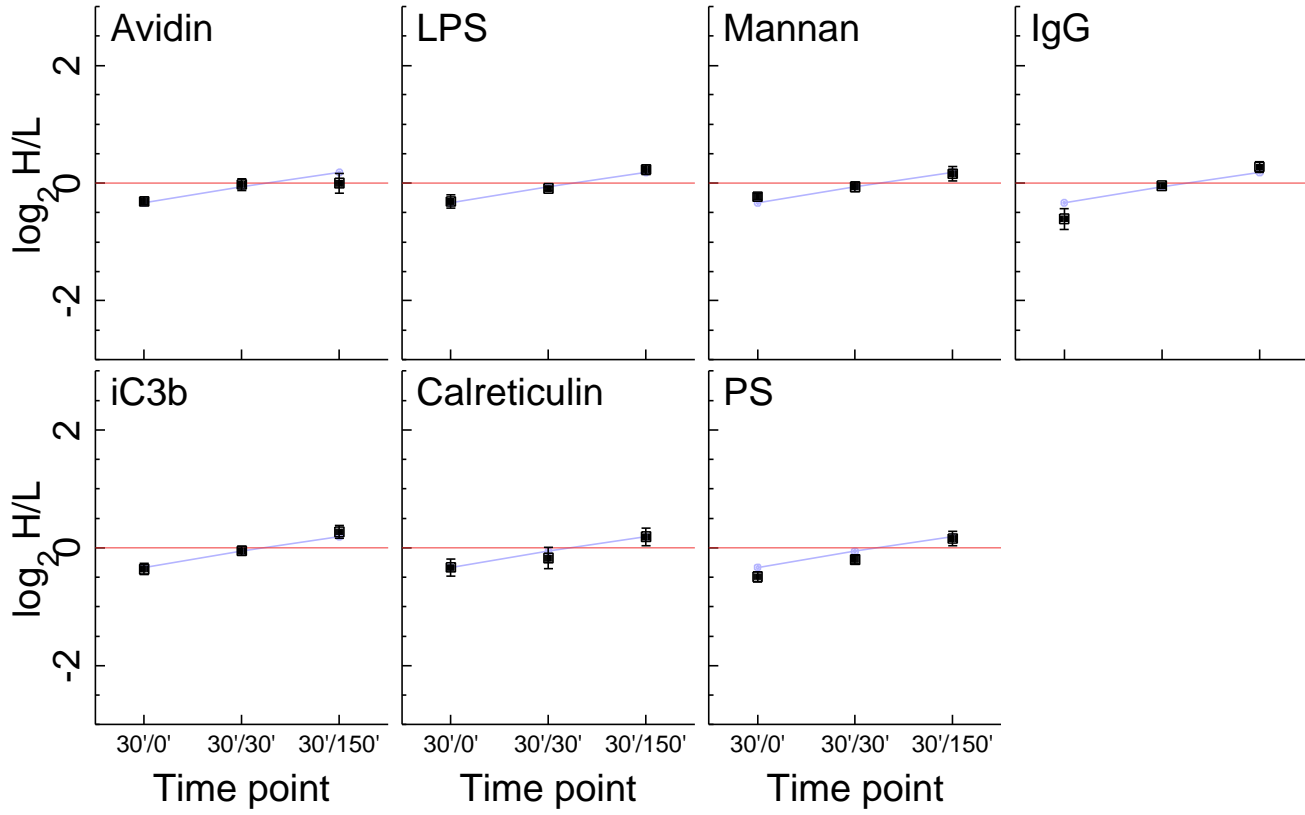

### irgm2 (Q9Z1M2)

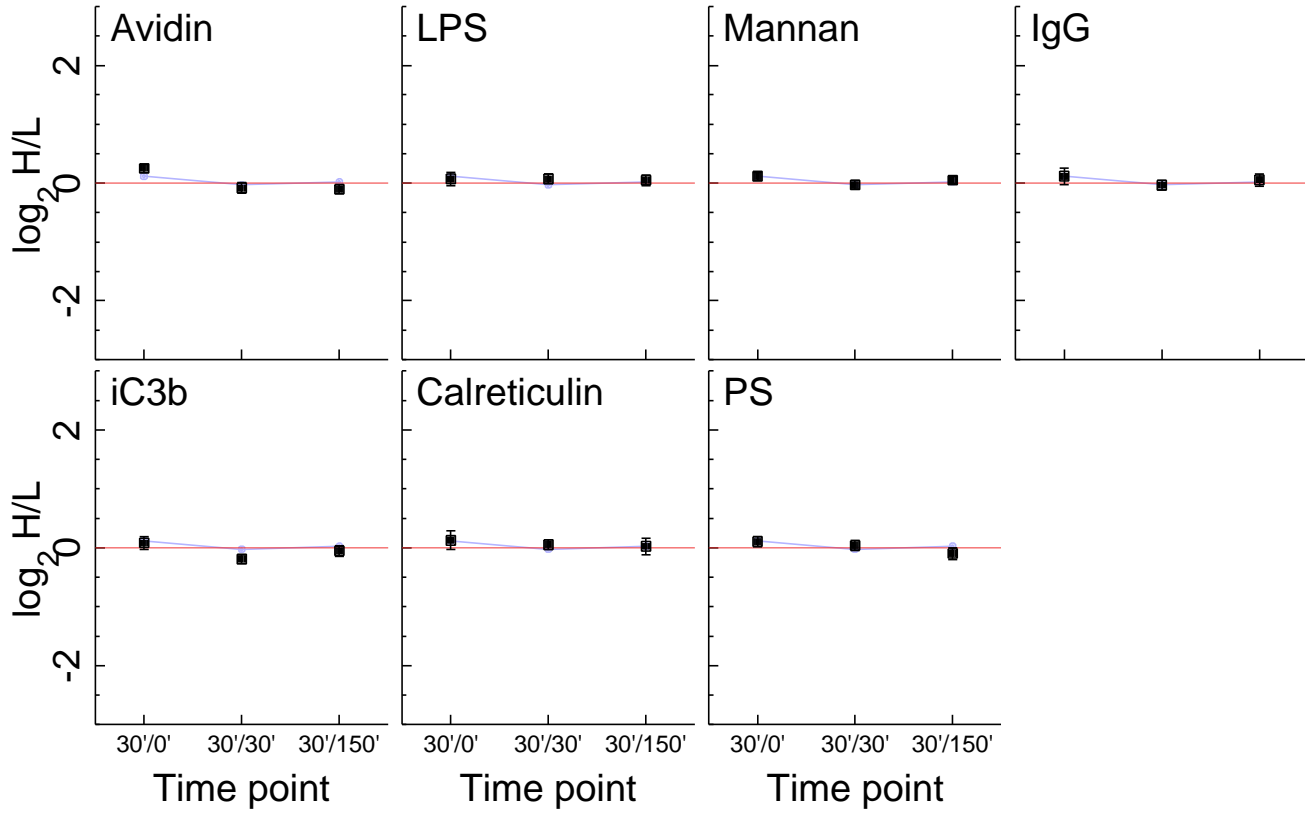

isg15 (Q64339)

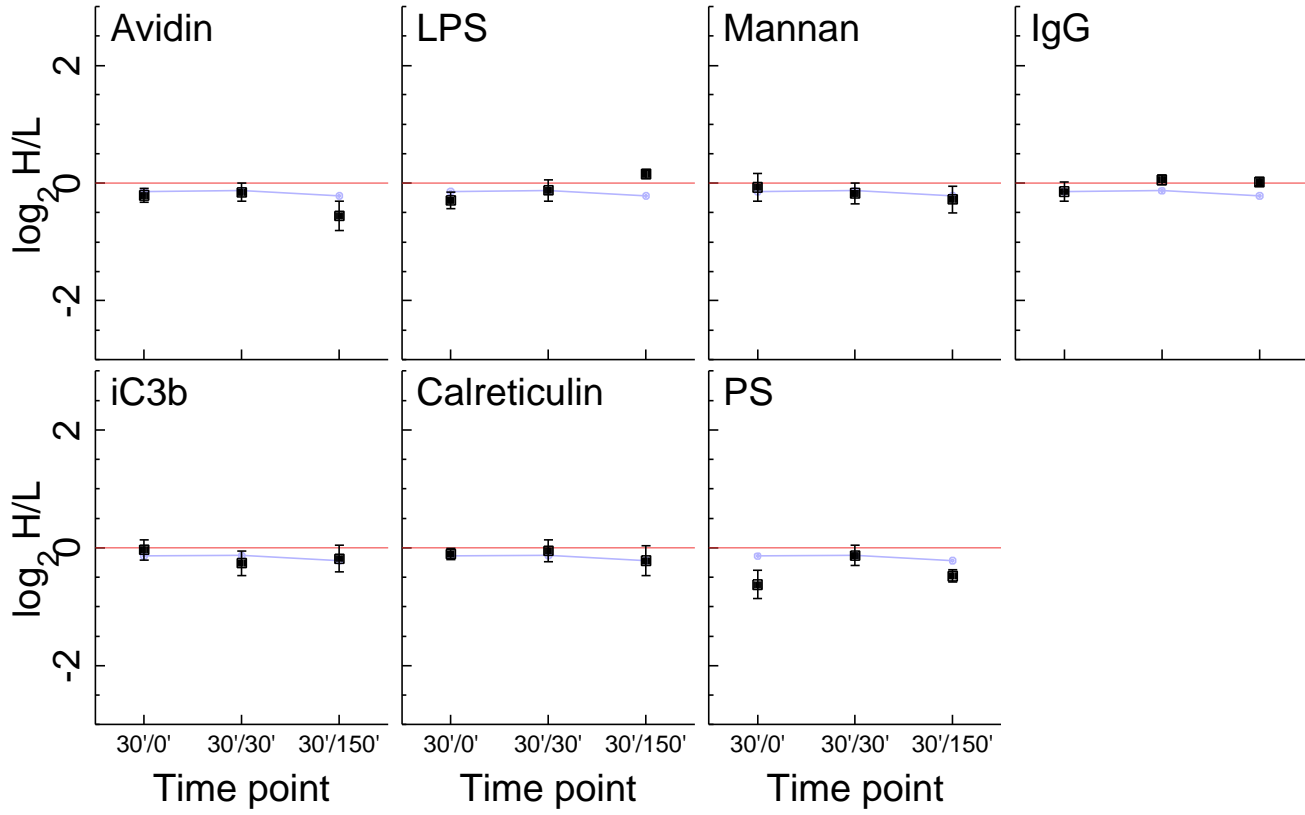

### isg20 (Q9JL16)

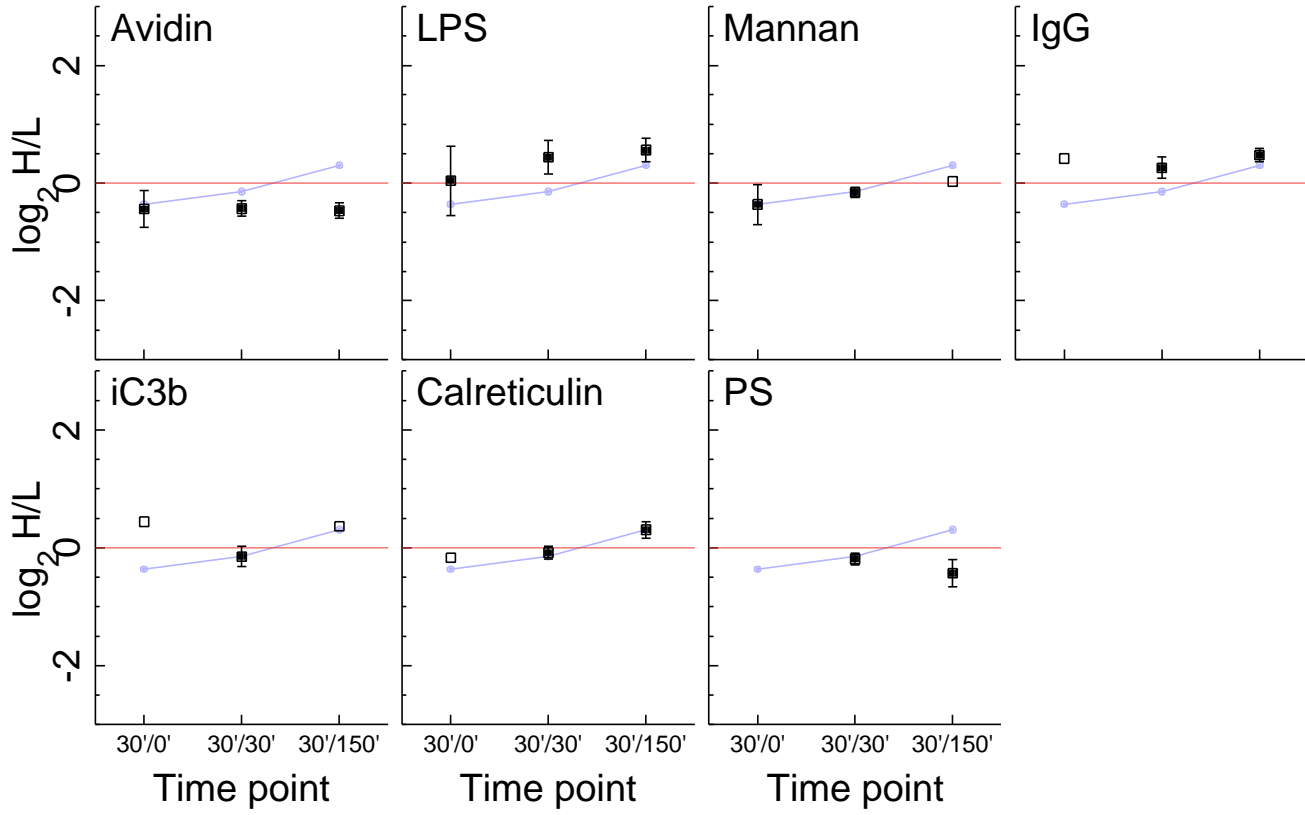

### ist1 (Q9CX00)

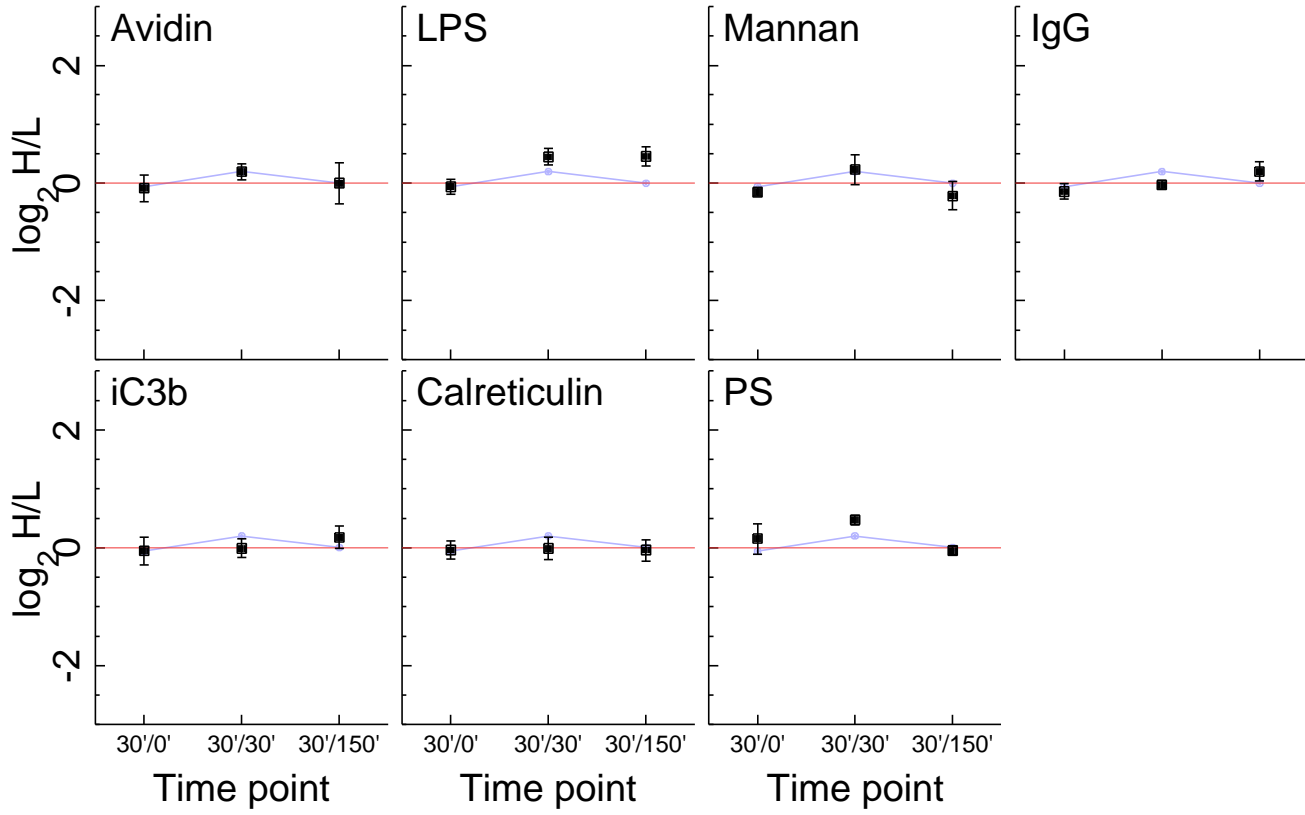

### itch (Q8C863)

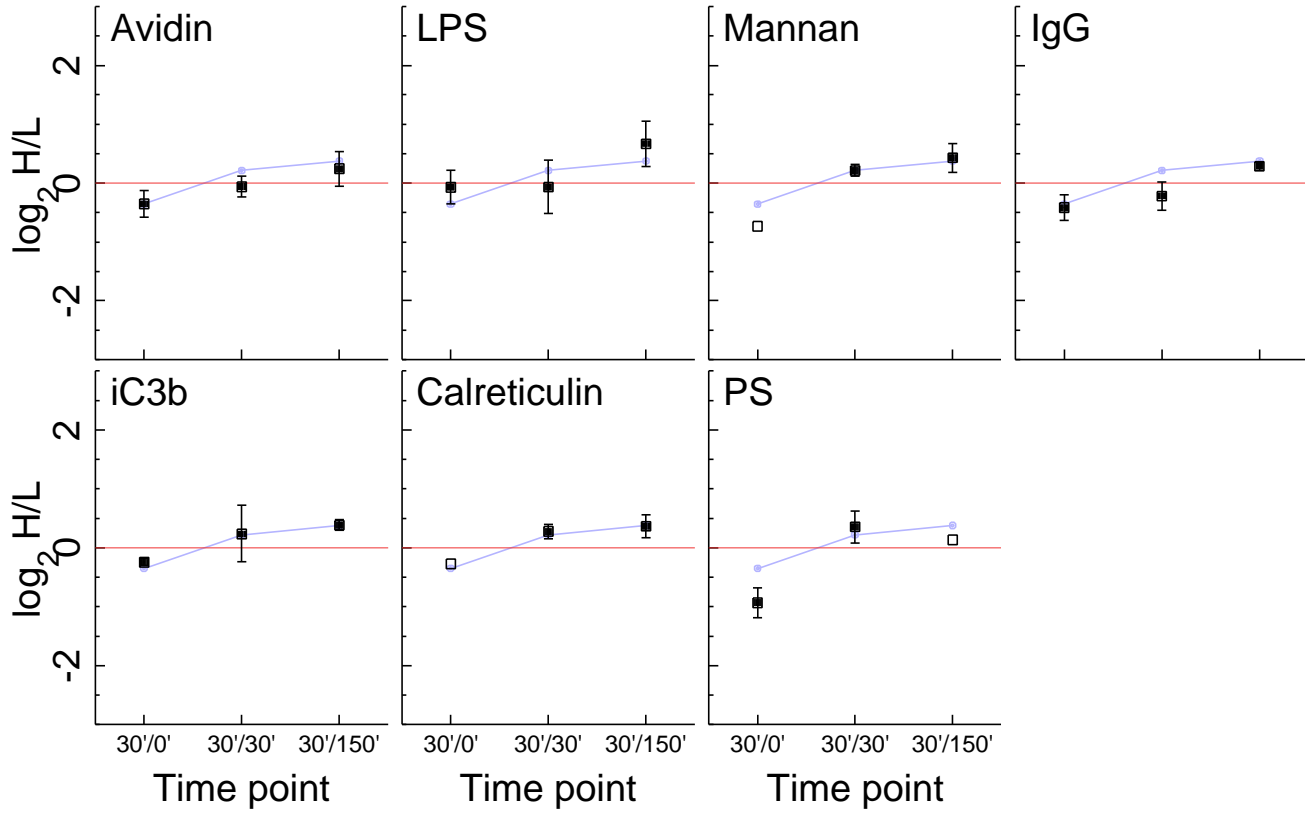

### itga4 (Q00651)

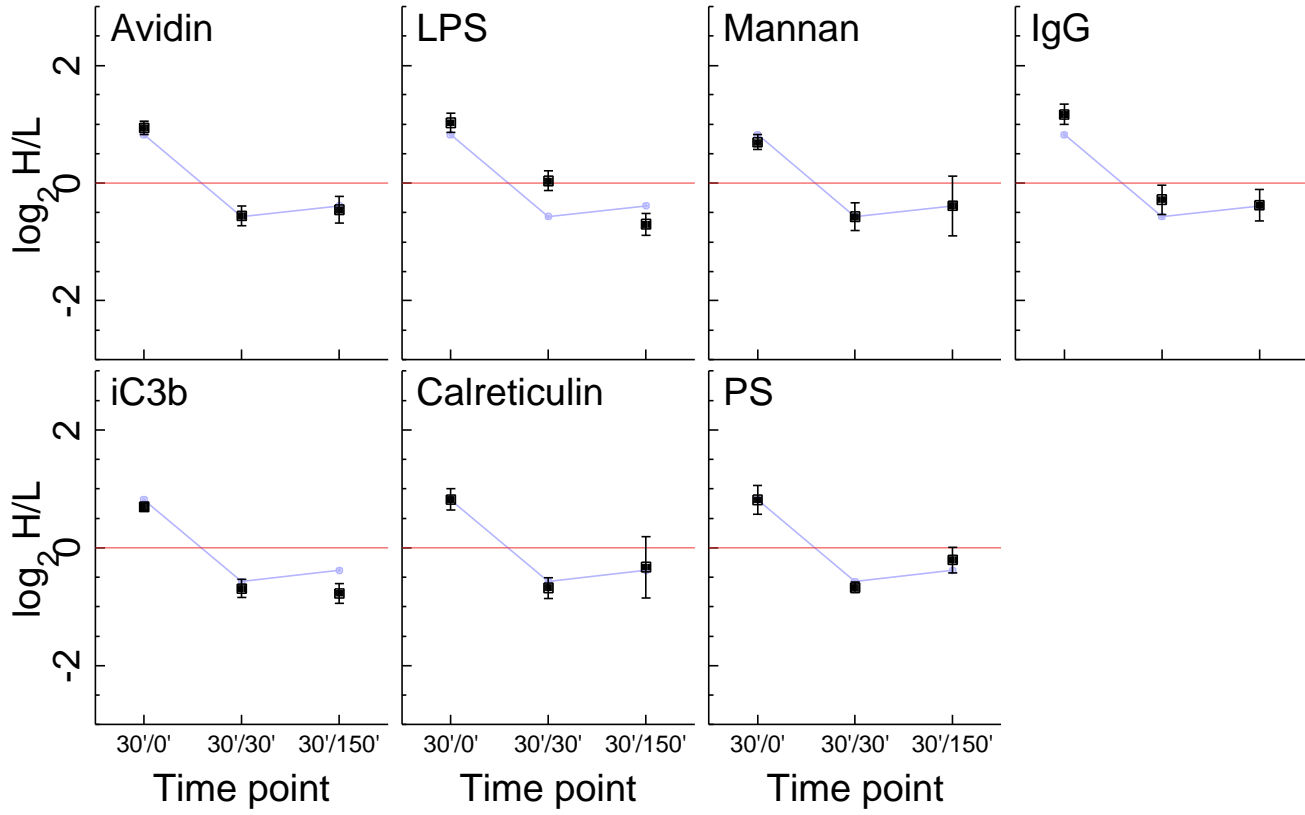



### itga5 (P11688)

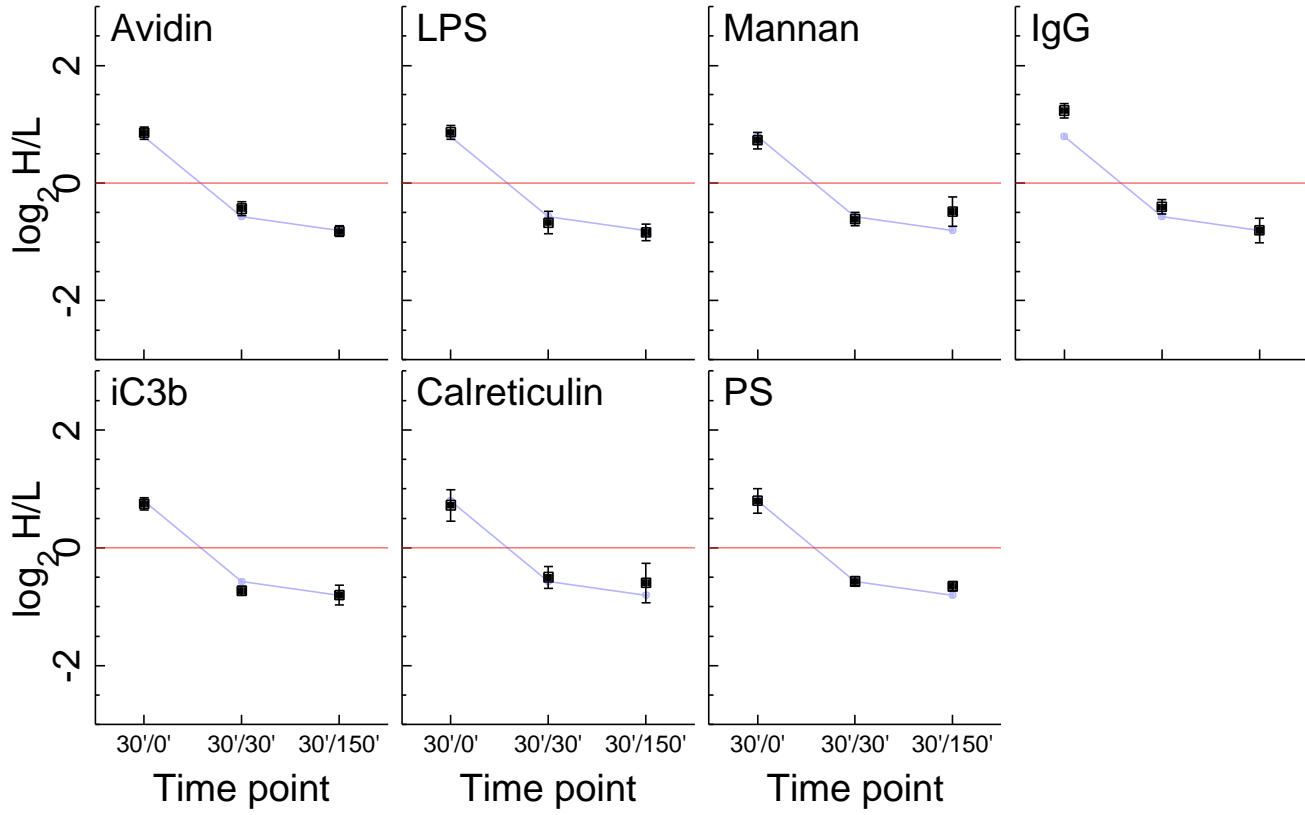

### itga6 (Q61739)

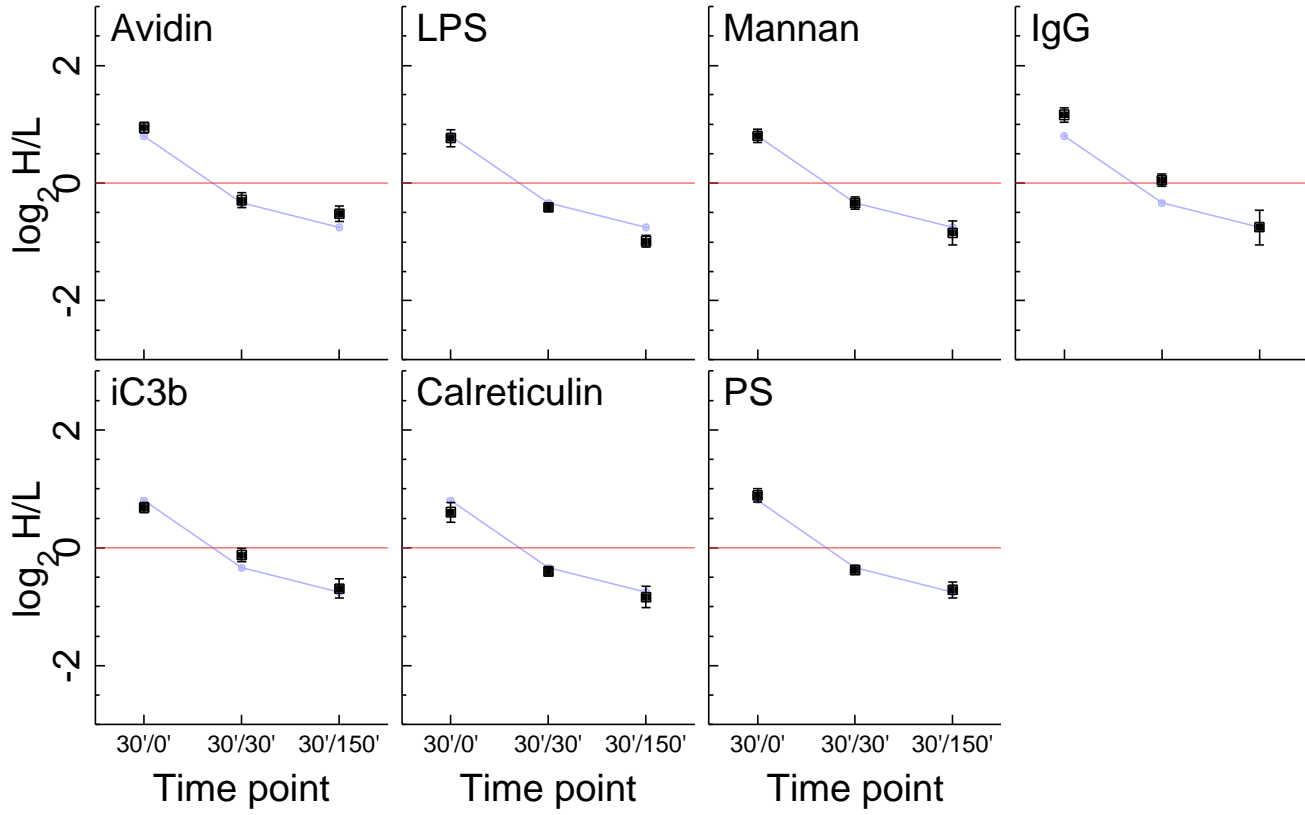

### itgam (E9Q604)

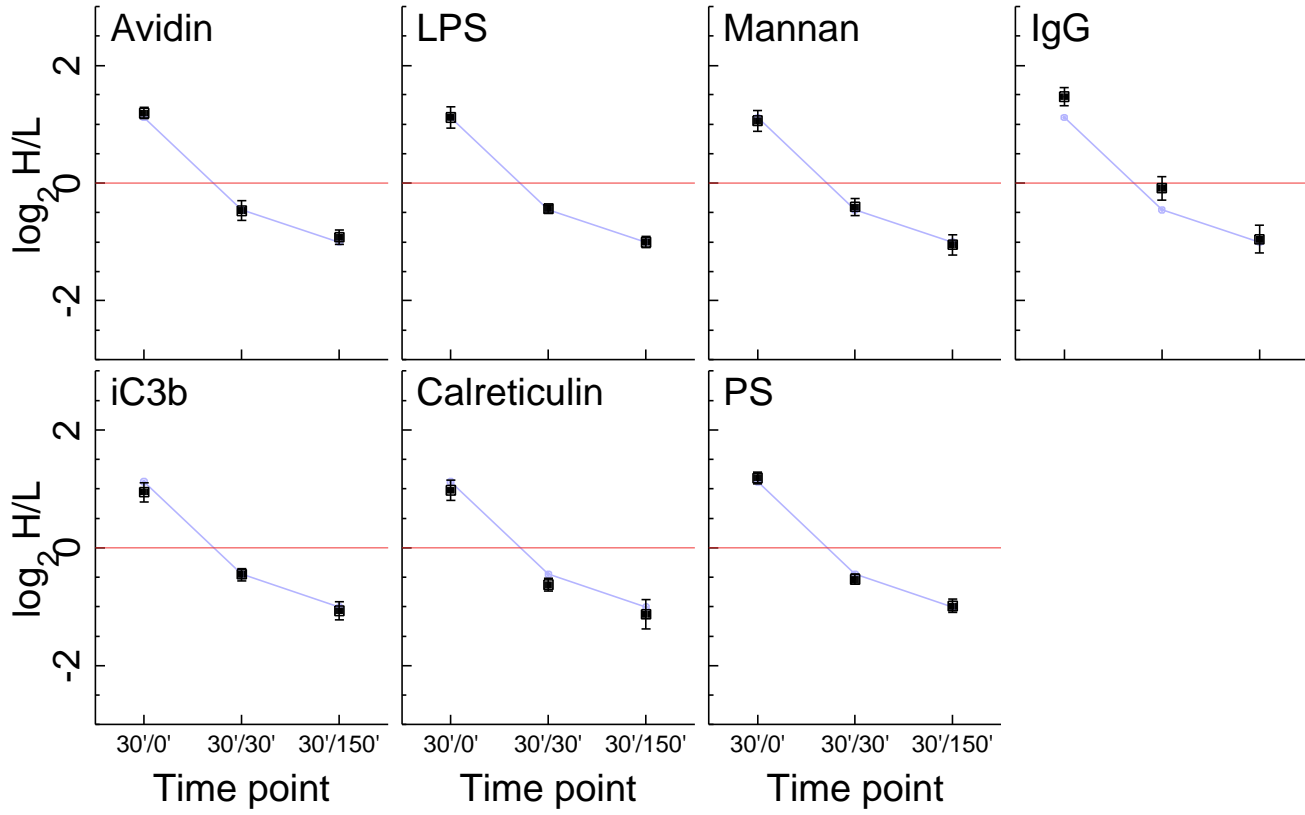

itgav (P43406)

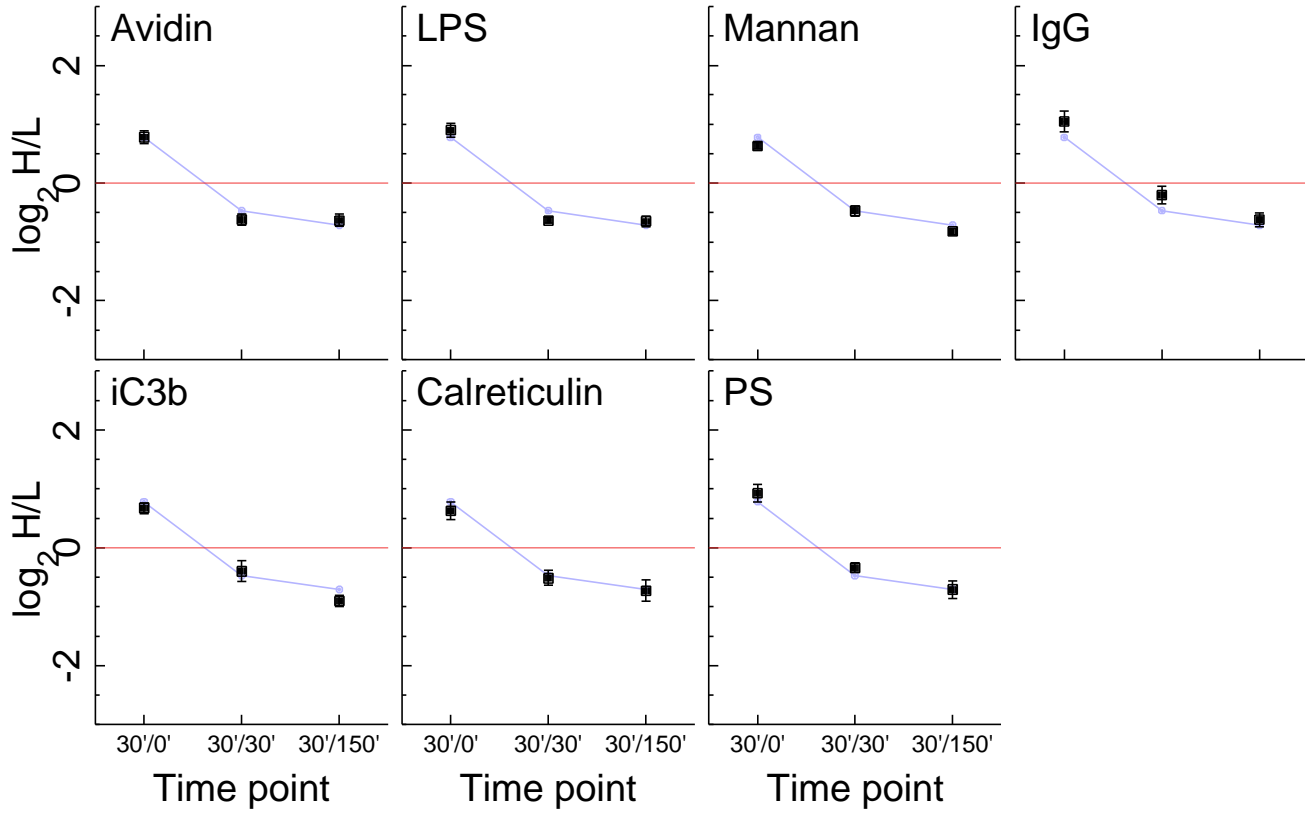

### itgax (Q9QXH4)

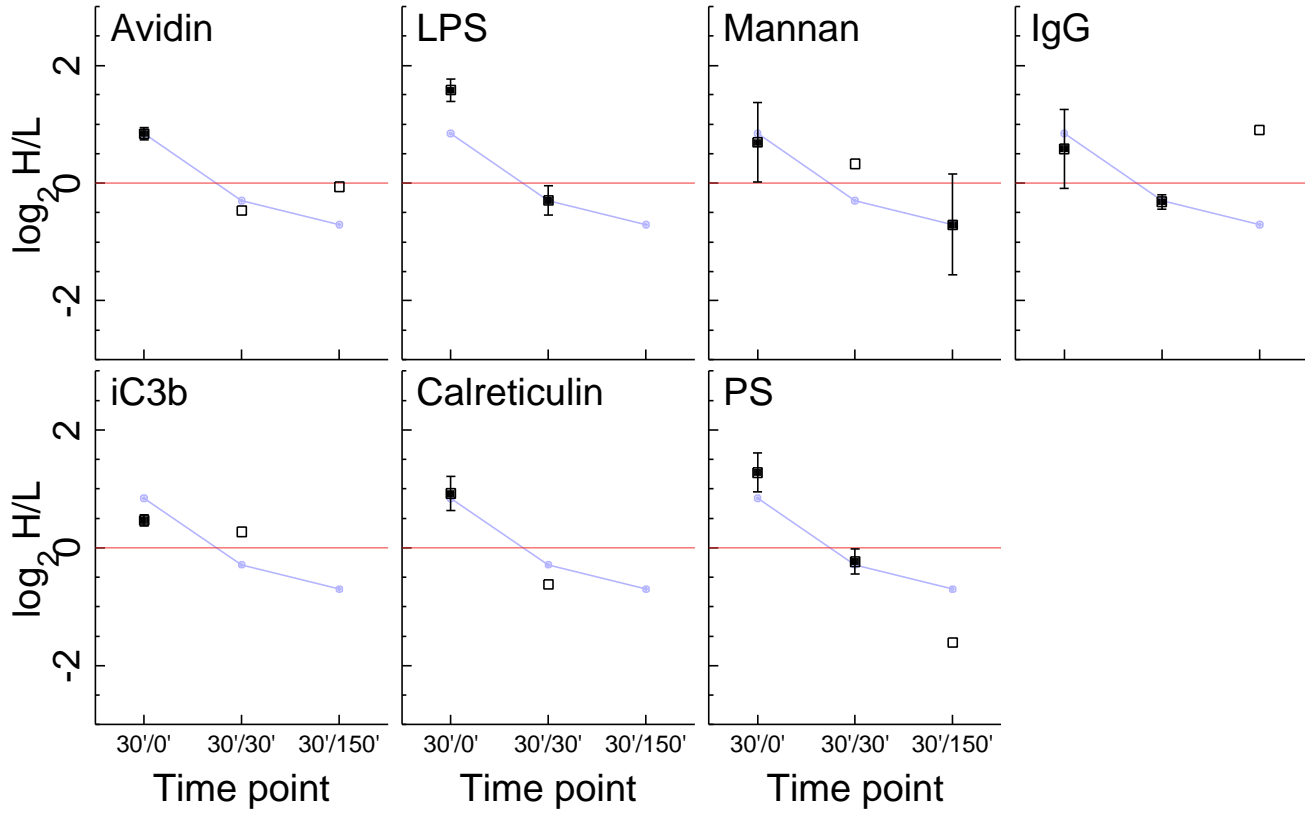

### itgb1 (P09055)

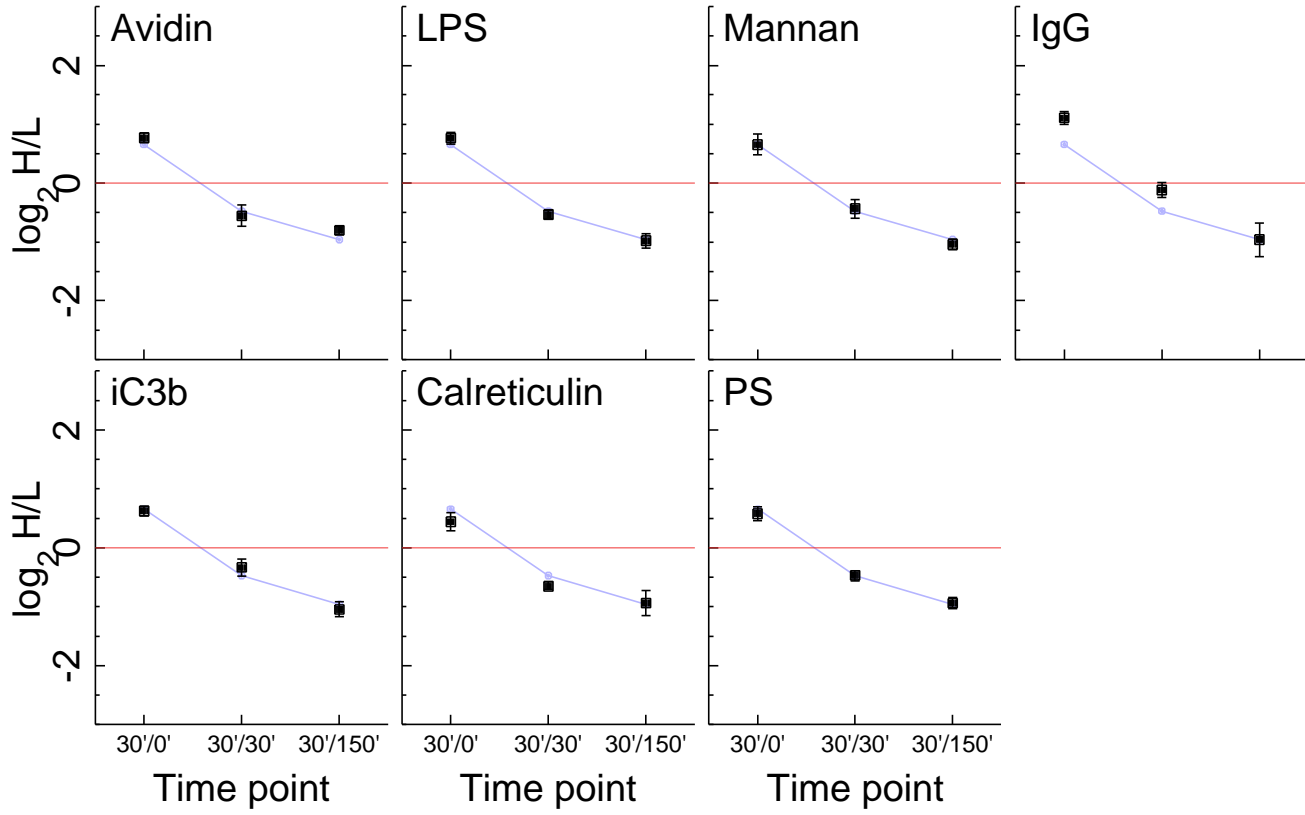

### itgb2 (P11835)

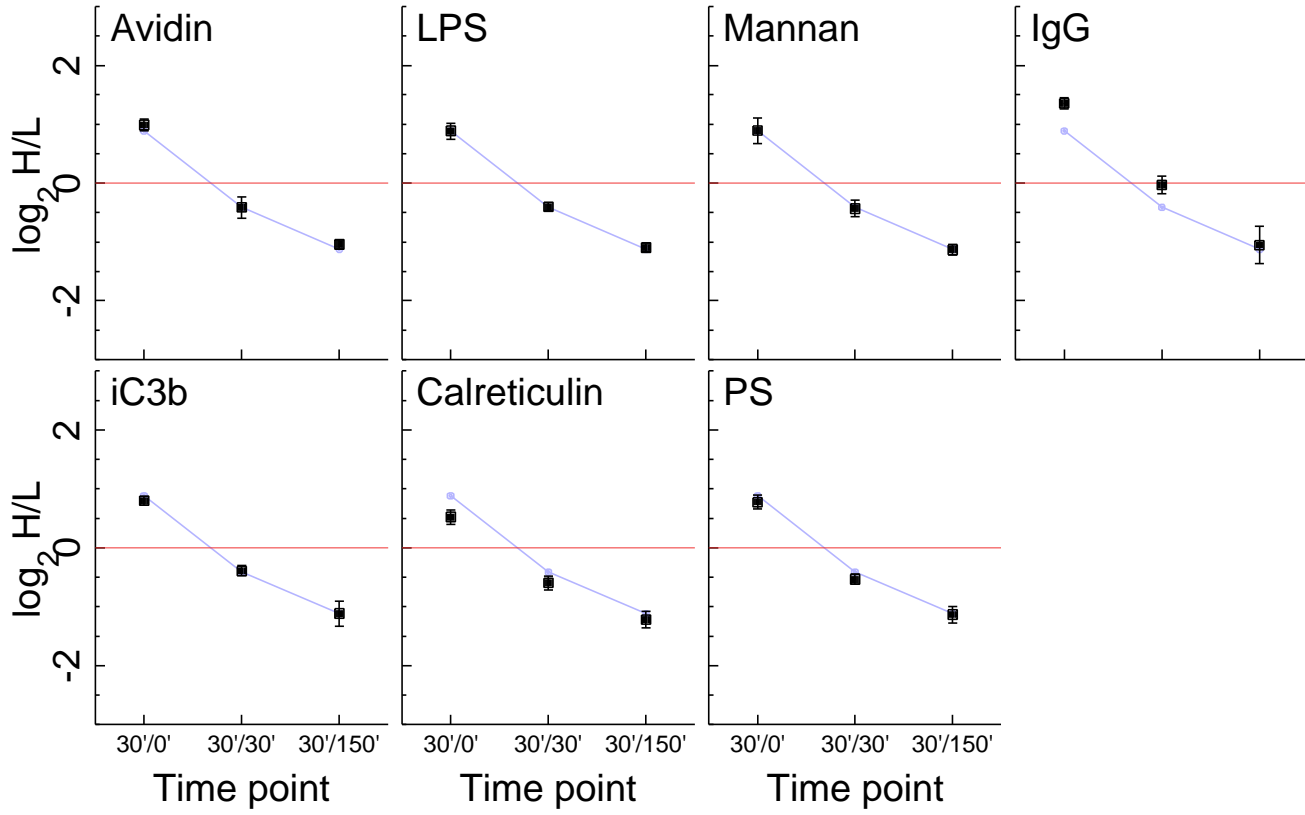

### itgb5 (Q6PE70)

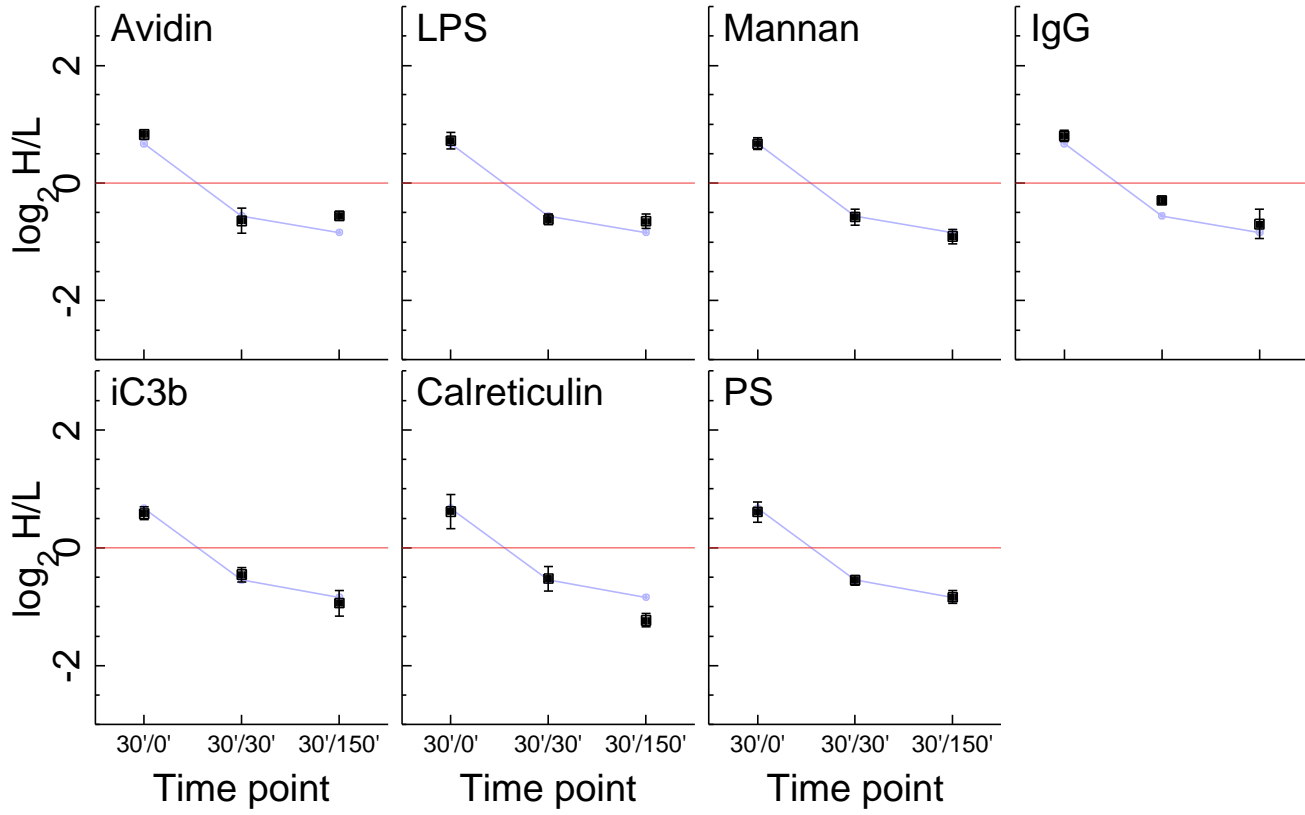



itm2b (O89051)

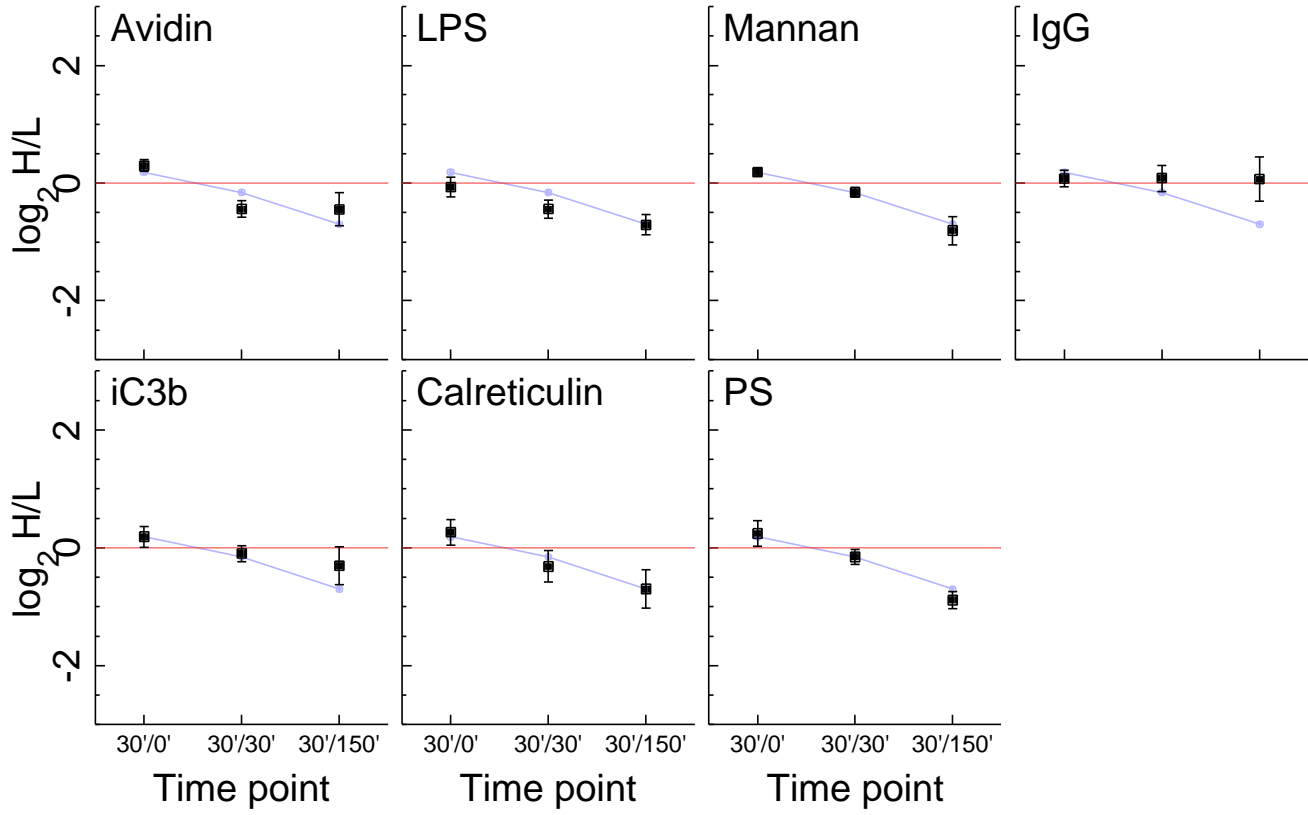

itsn2 (Q9Z0R6)

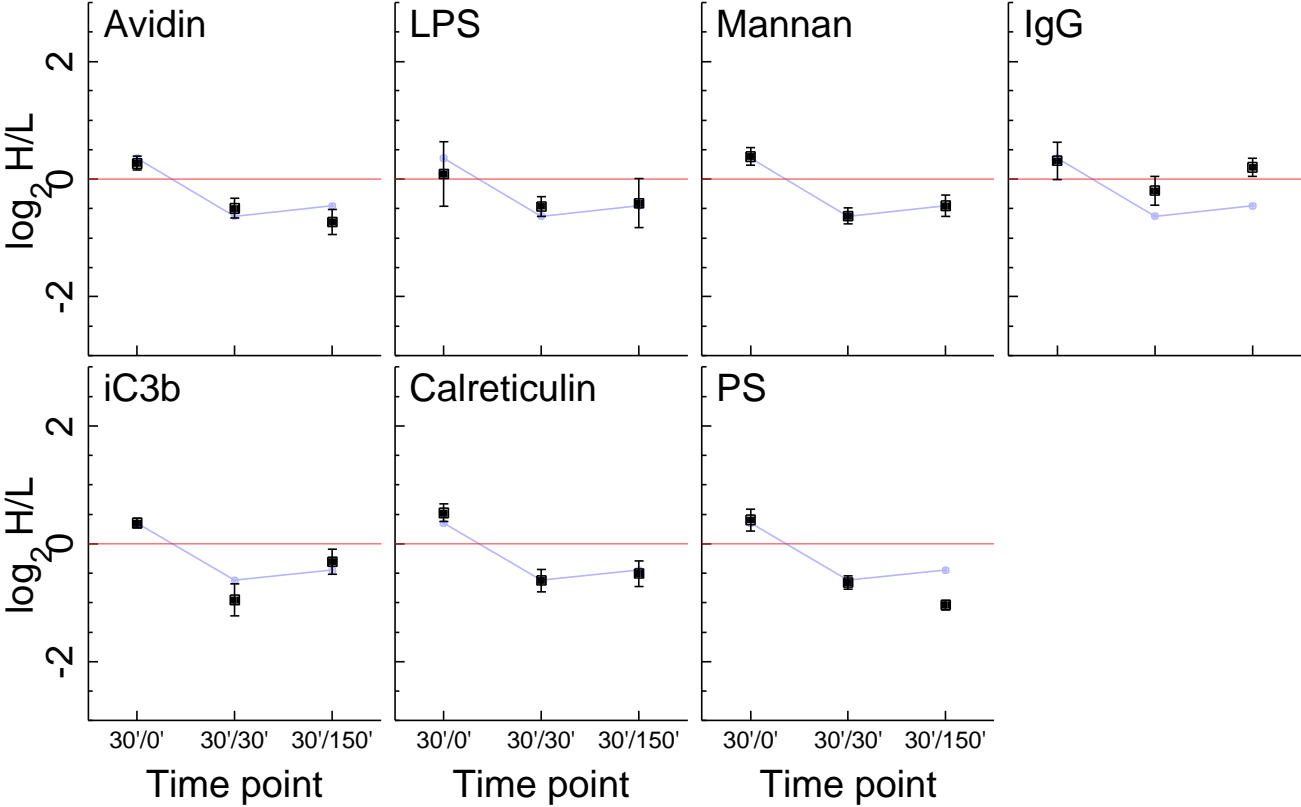

### j3qnb0 (J3QNB0)

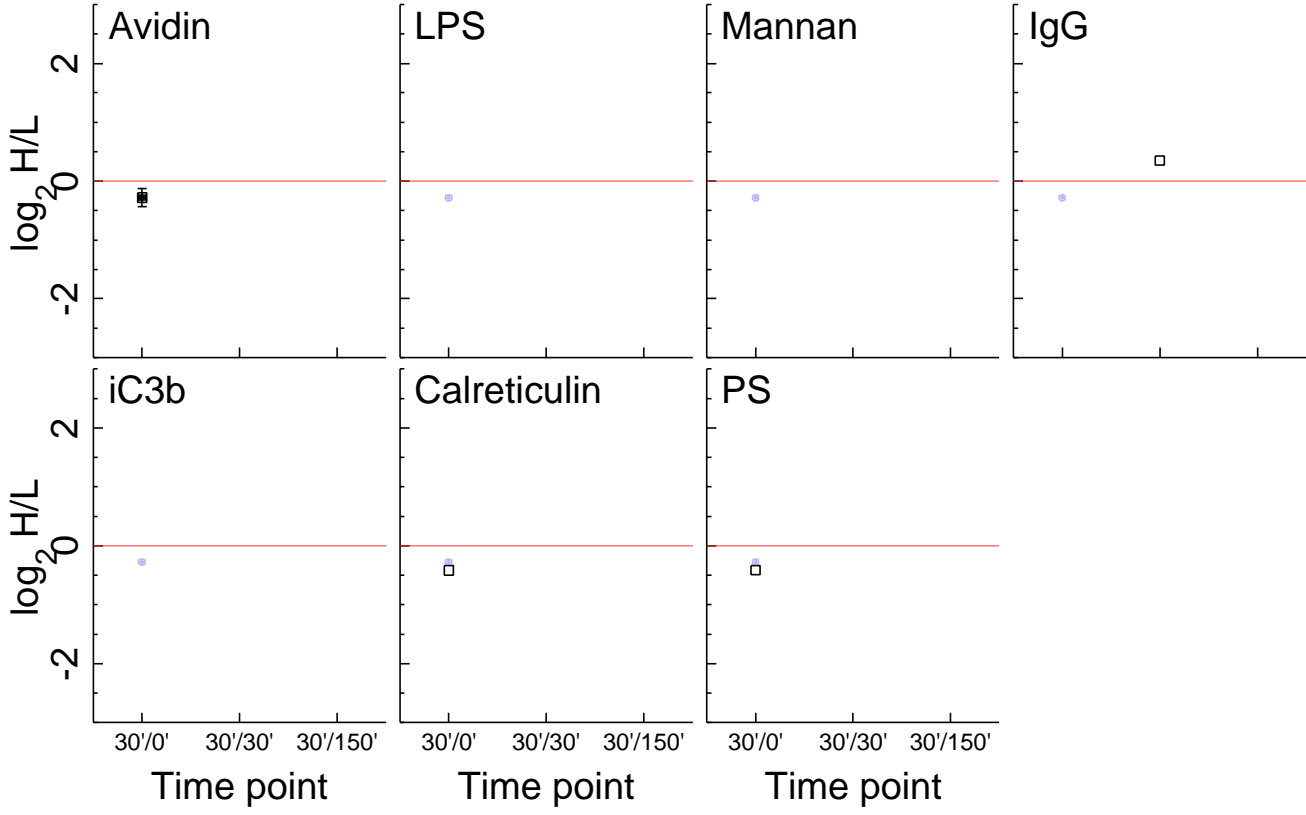

### jak1 (B1ASP2)

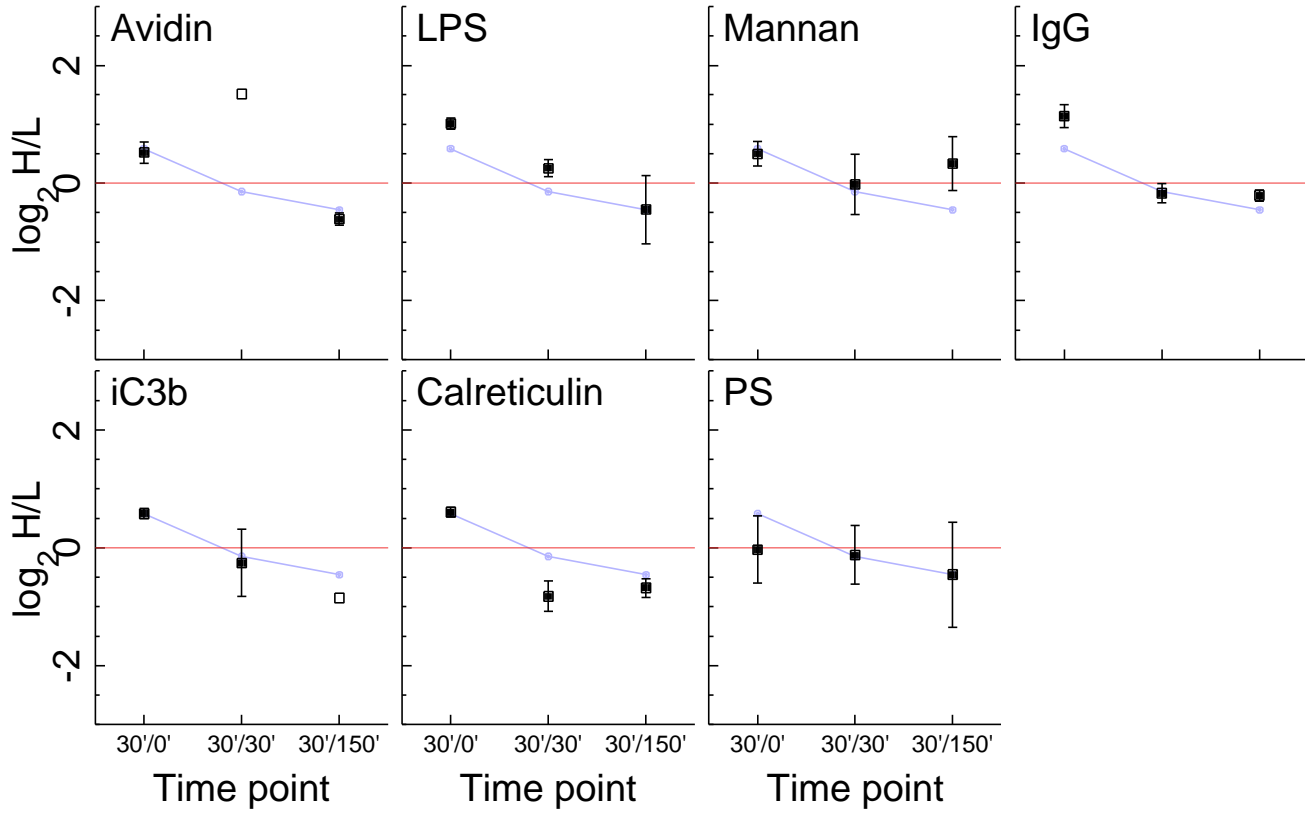

### jup (Q02257)

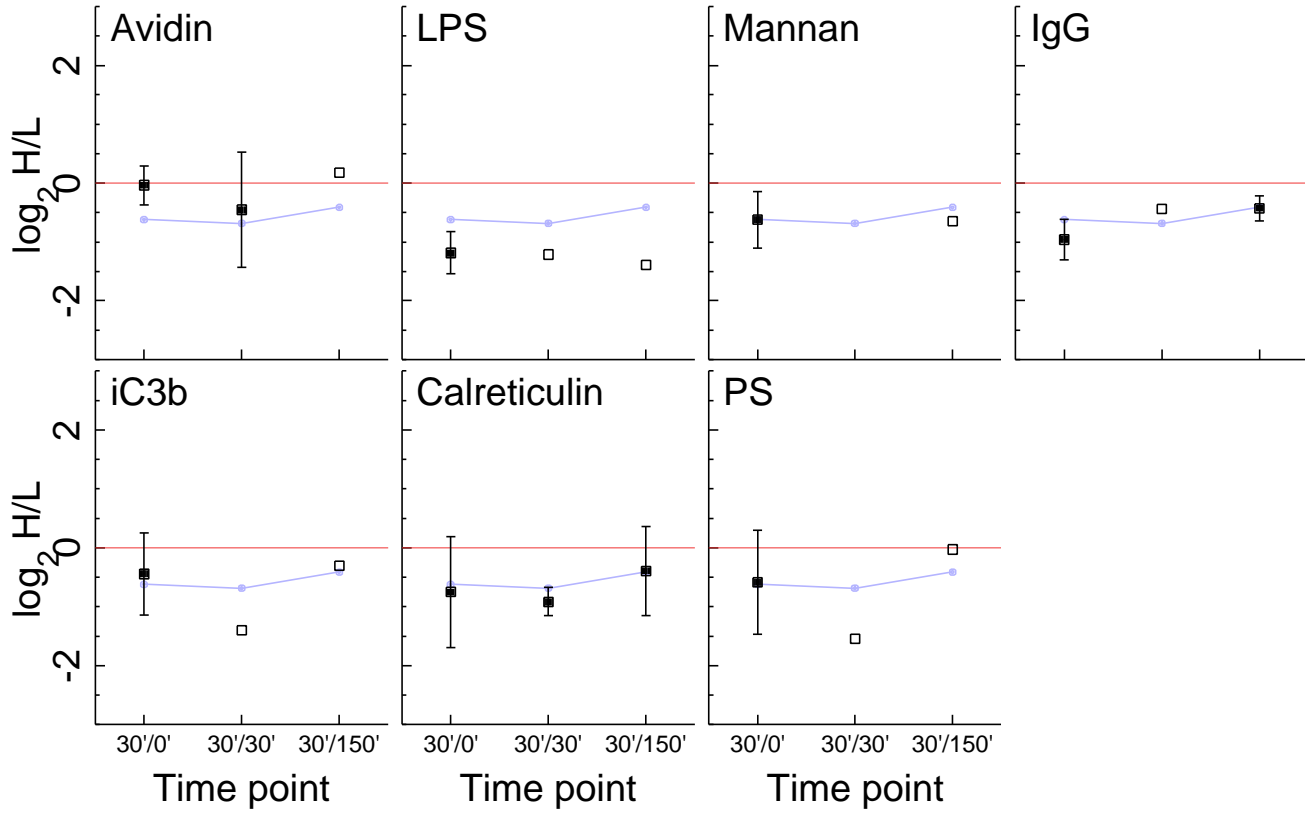

kat2a (Q9JHD2)

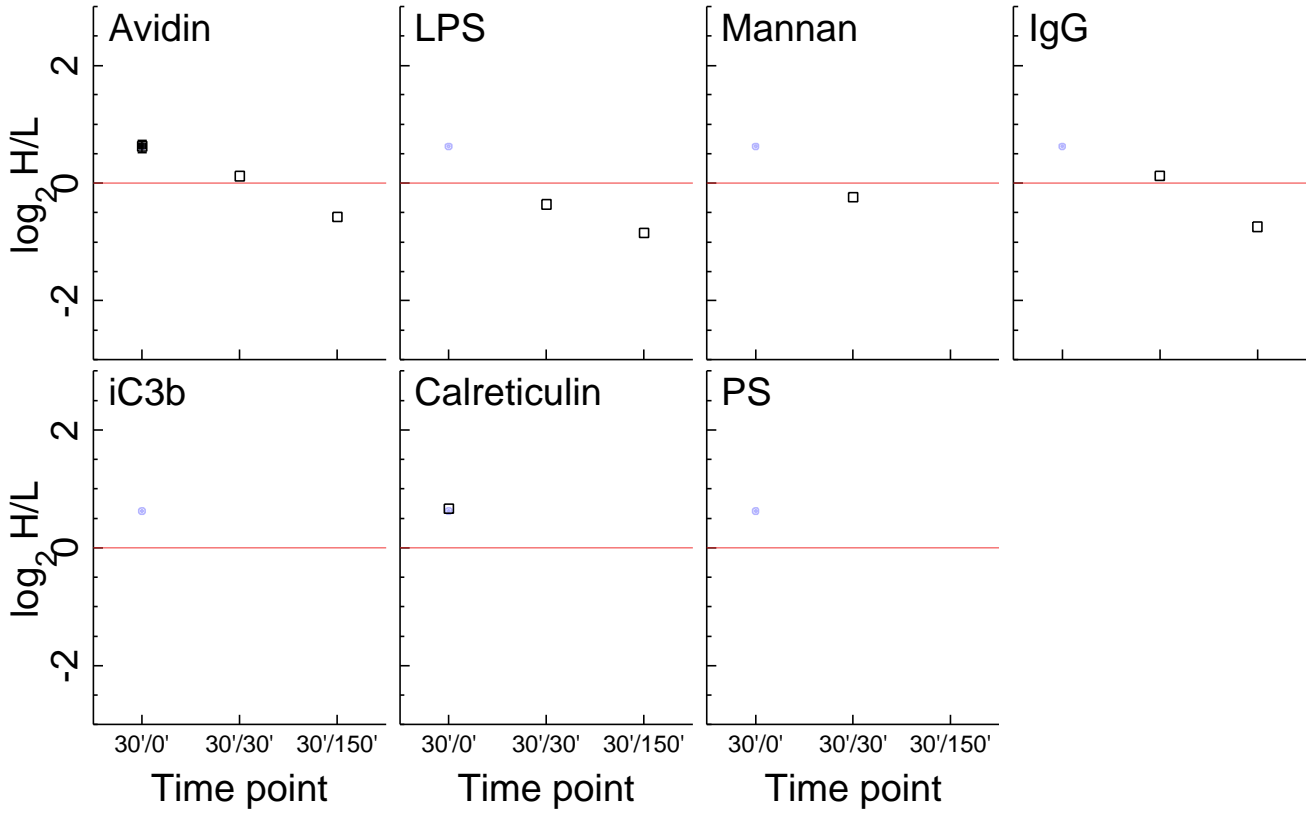

### kcnab2 (E0CXZ9)

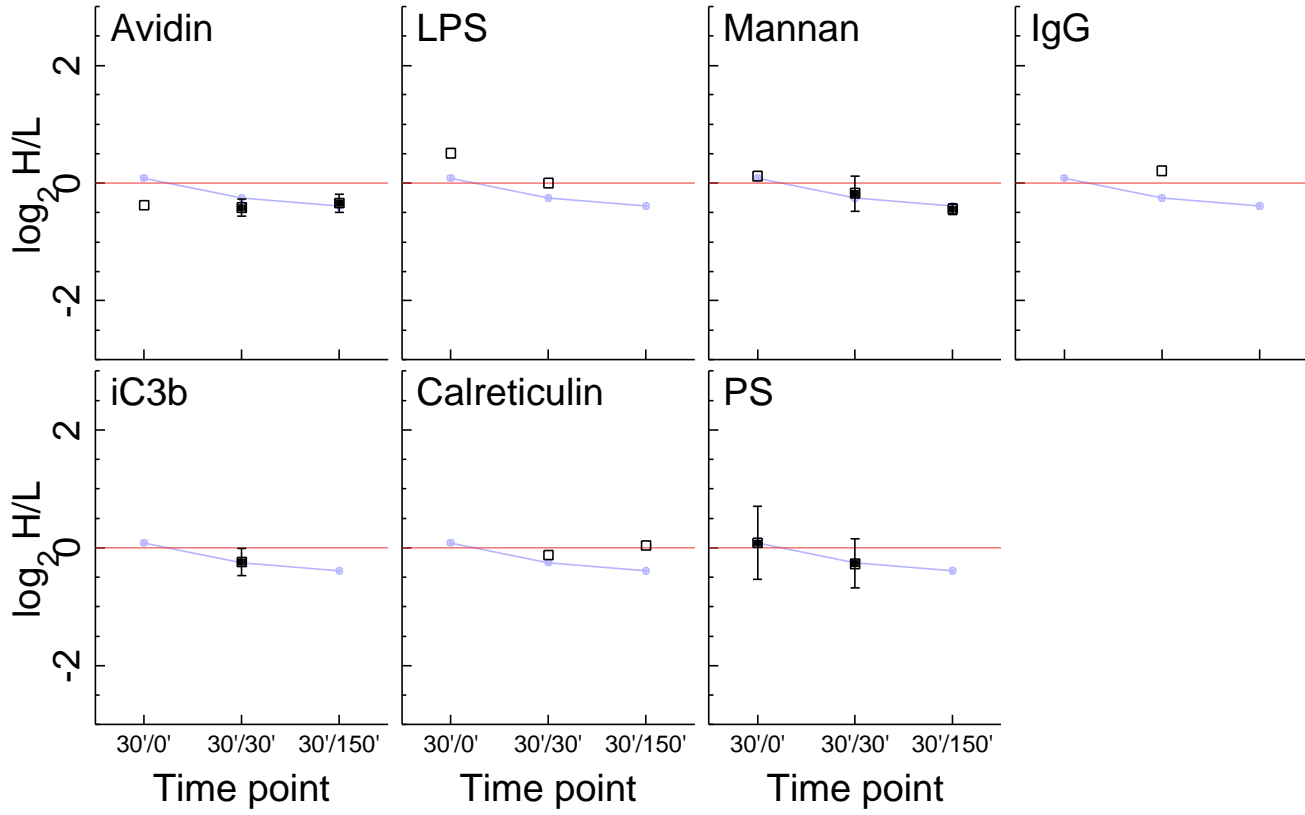

### kcnk6 (Q3TBV4)

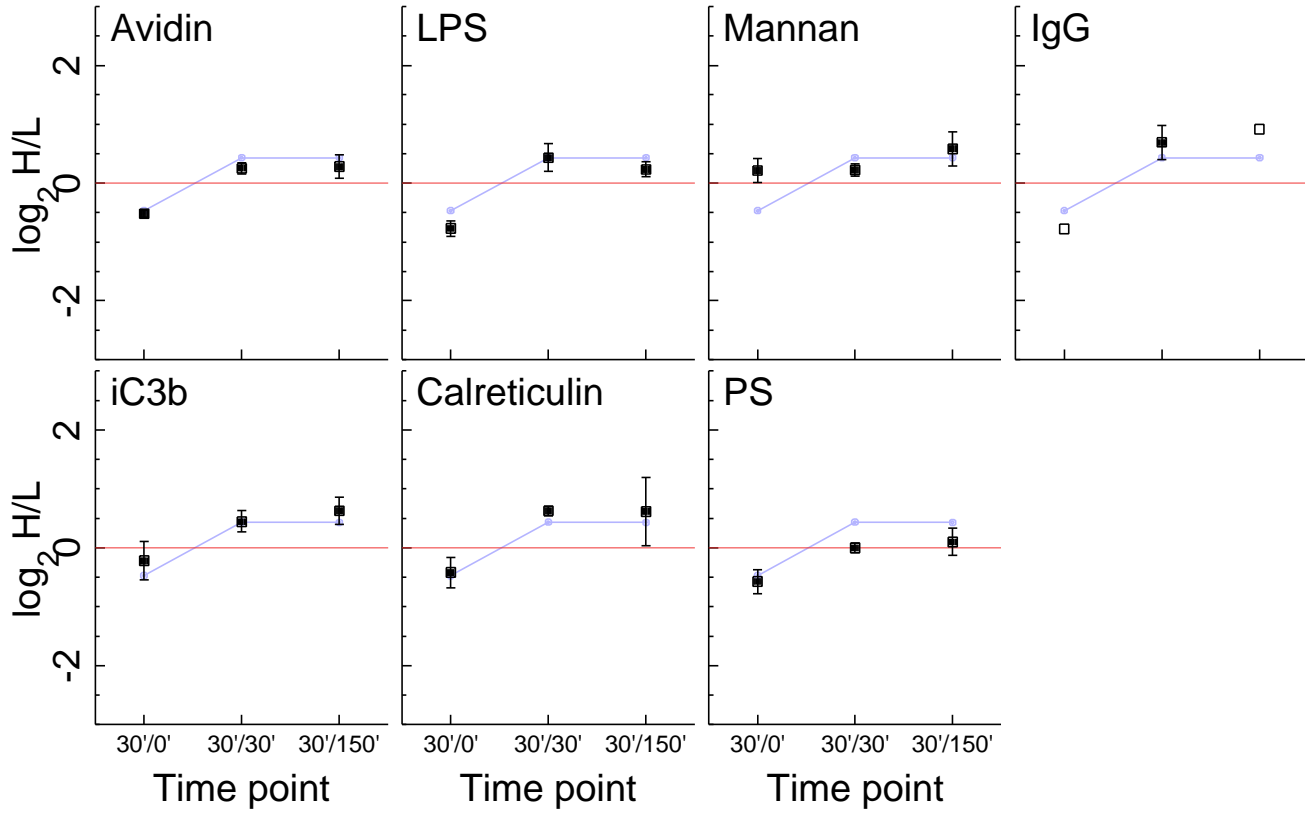



# kcnn4 (O89109)

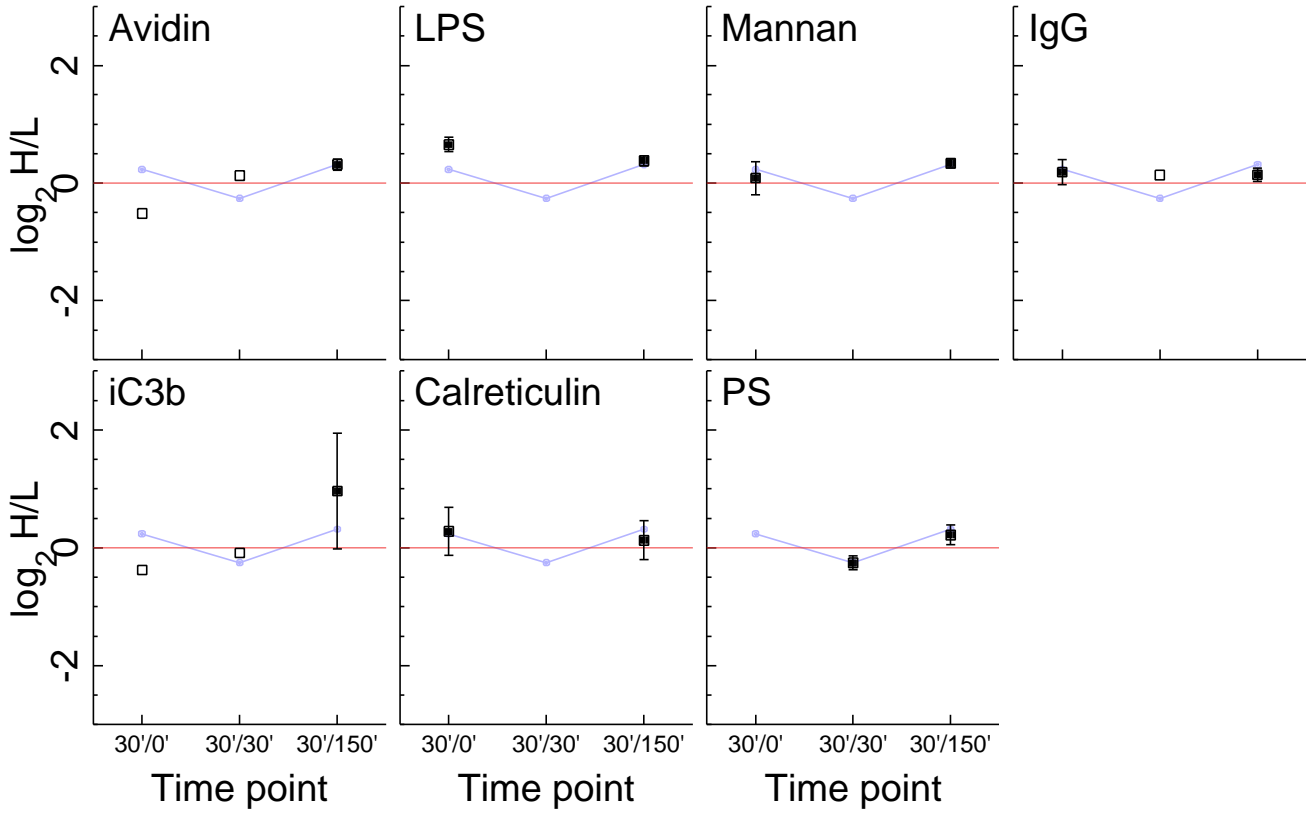

### kctd12 (Q6WVG3)

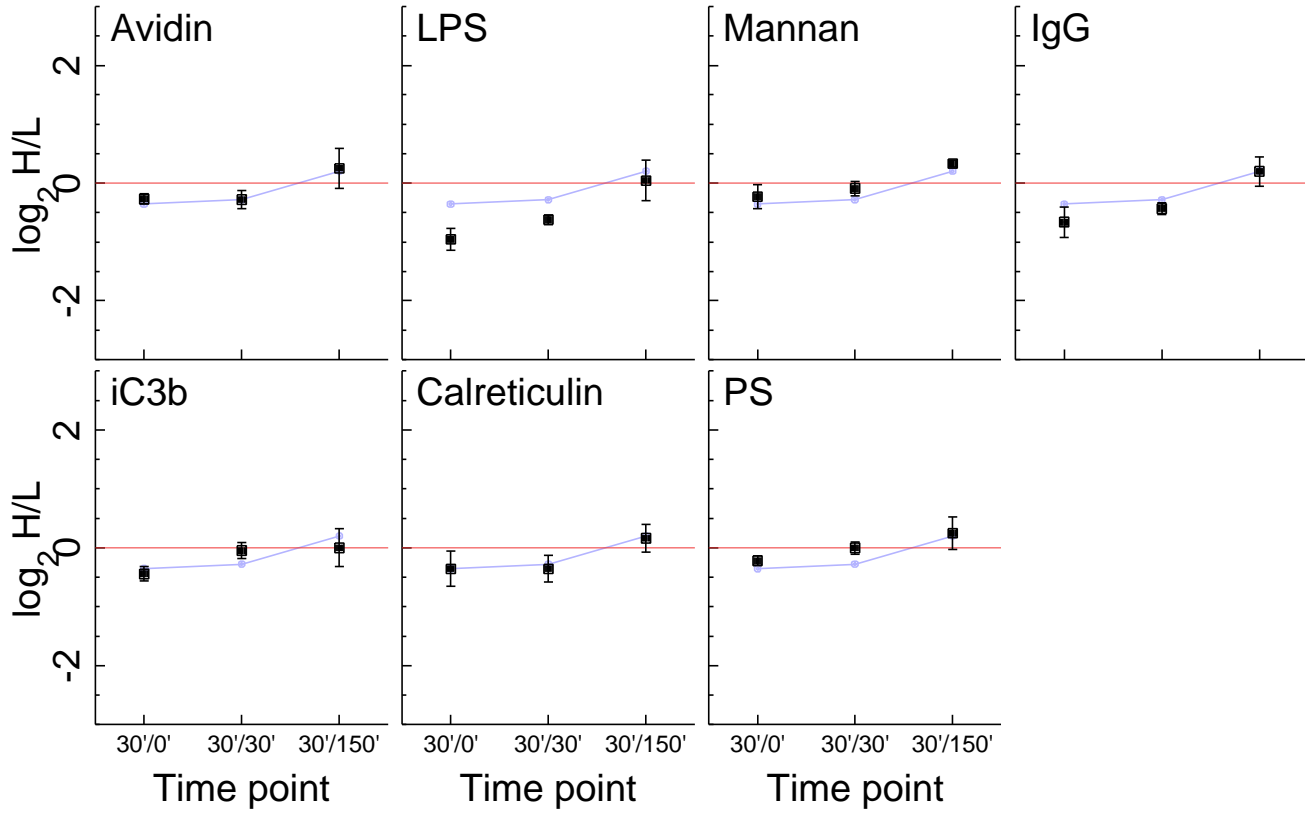

### kdelr1 (Q99JH8)

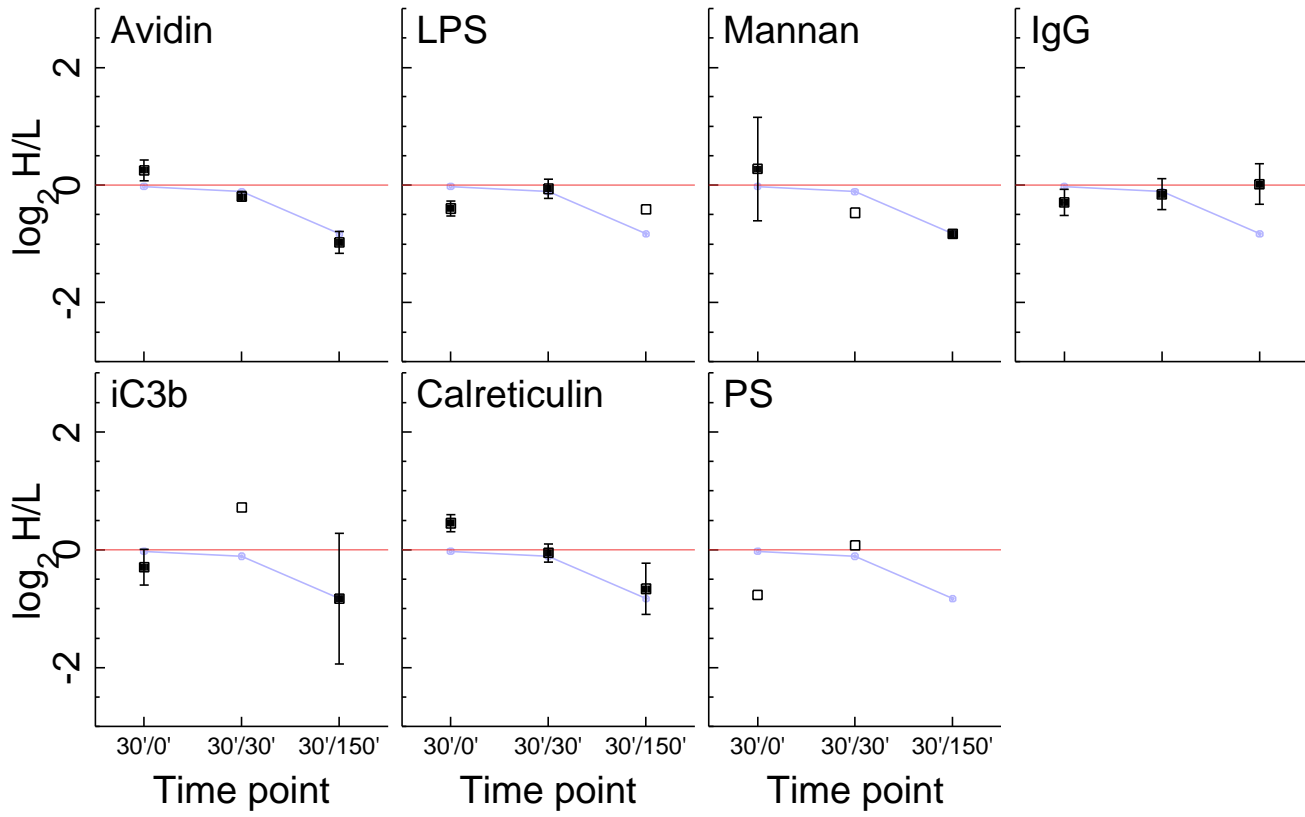

### kdm1a (A3KG93)

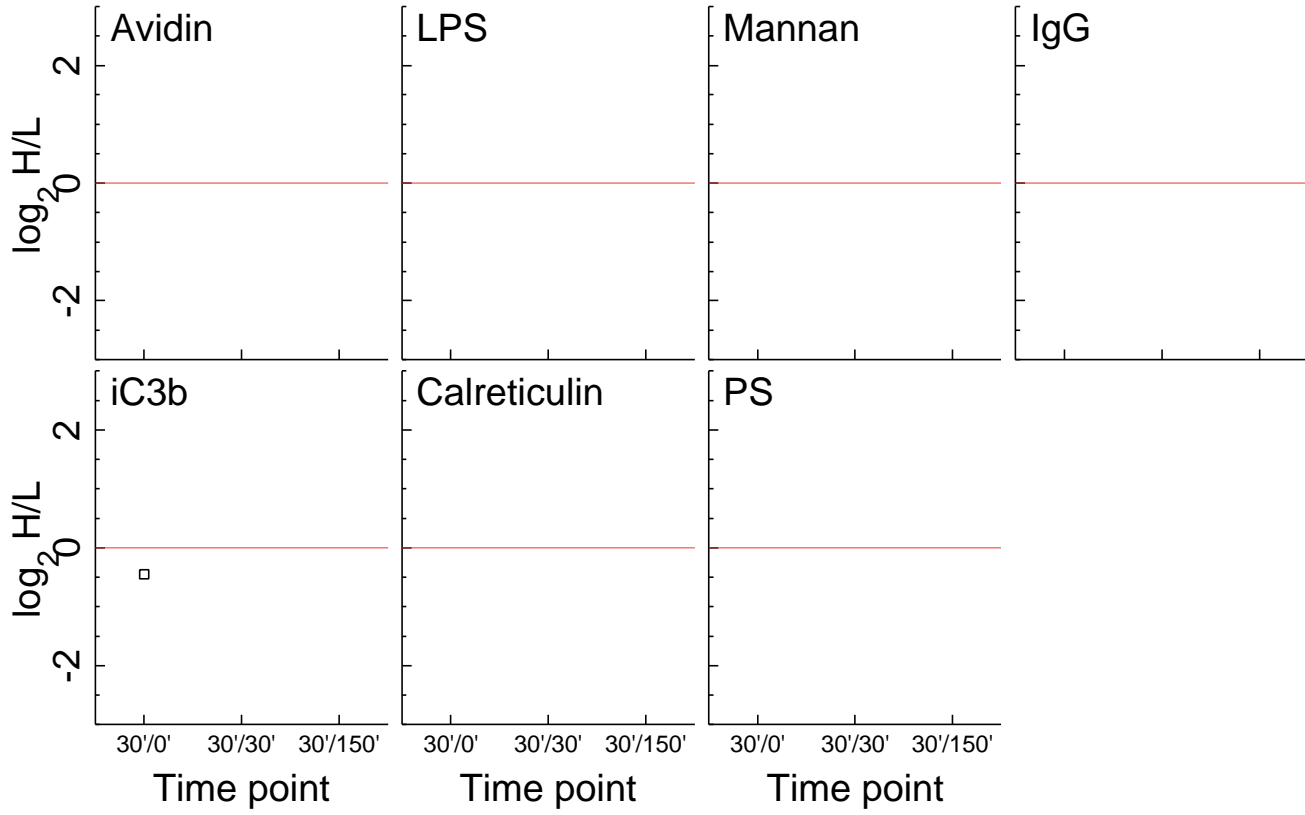

### kdm3b (B9EKS2)

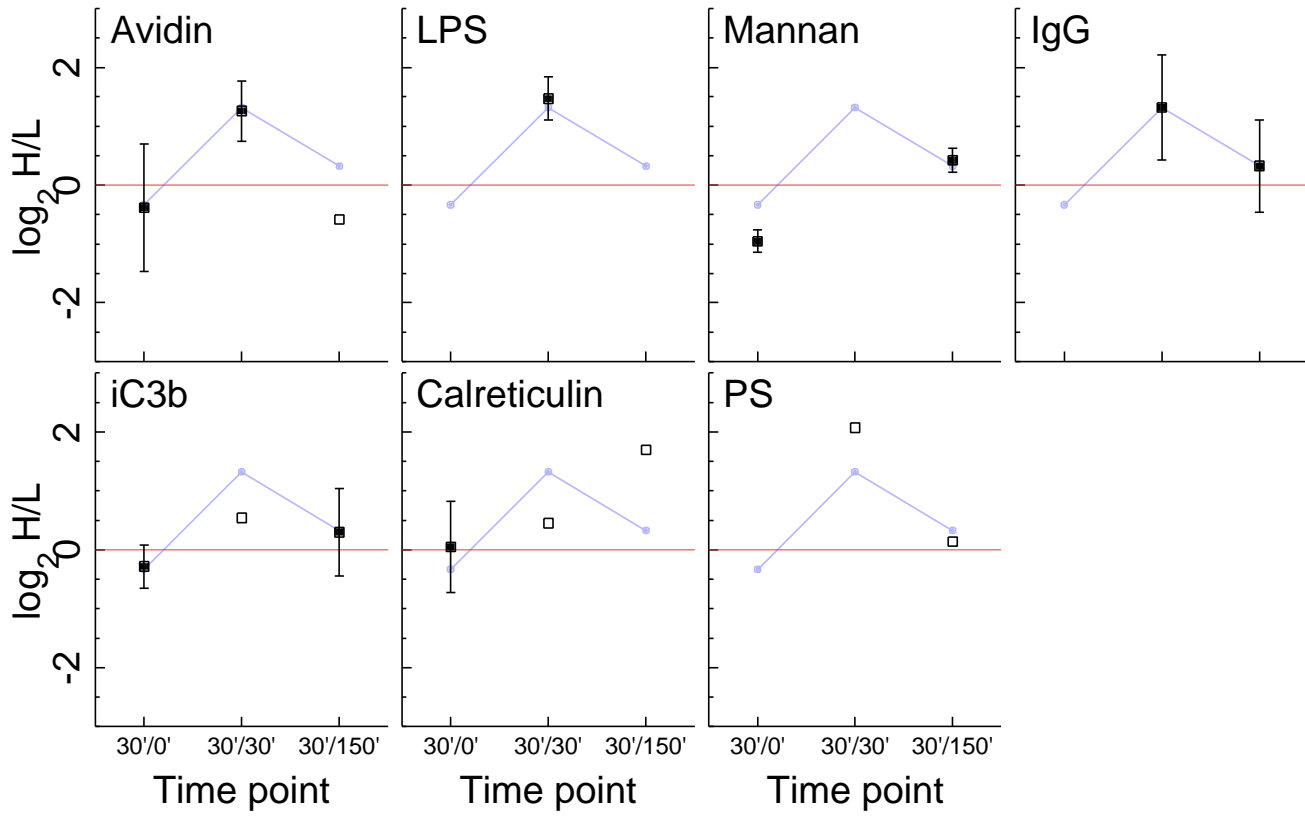

### khdrbs1 (Q60749)

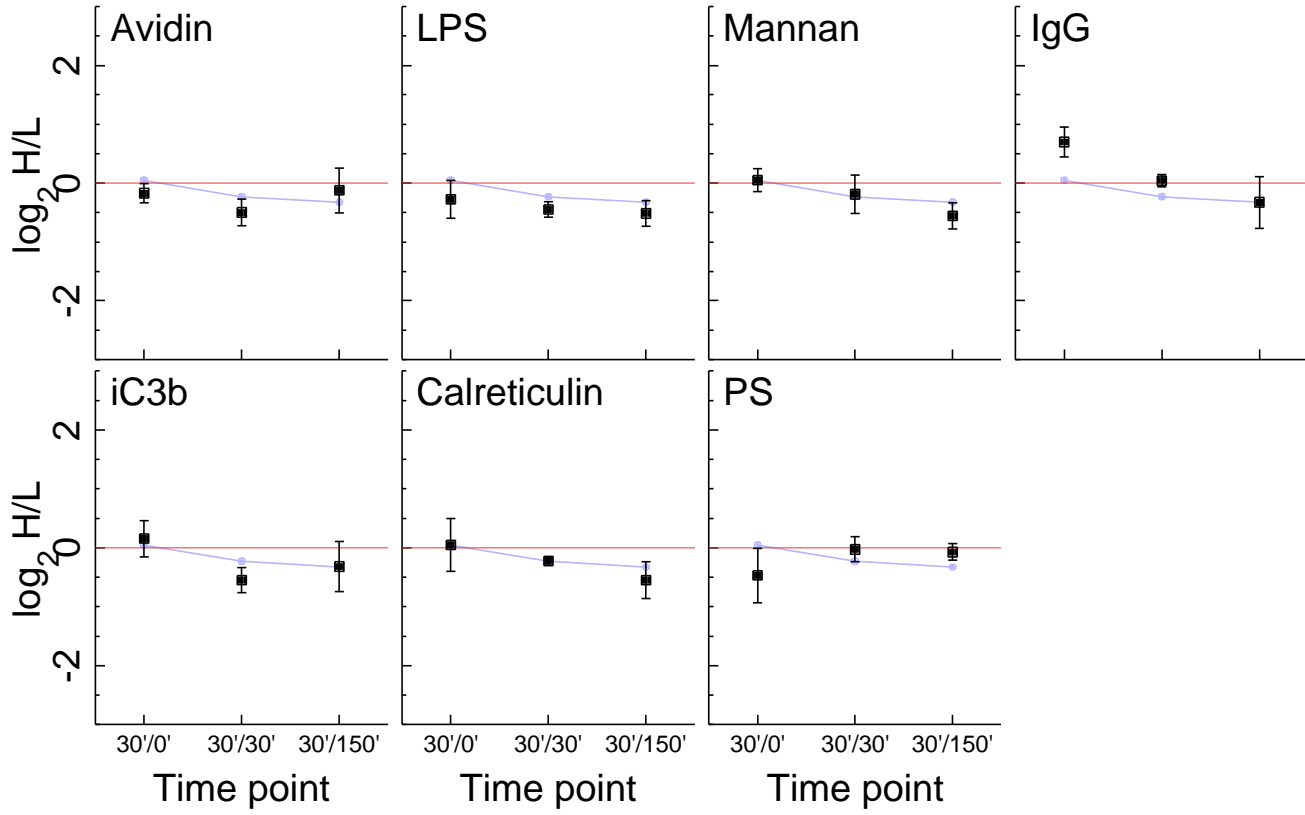

khsrp (Q3U0V1)

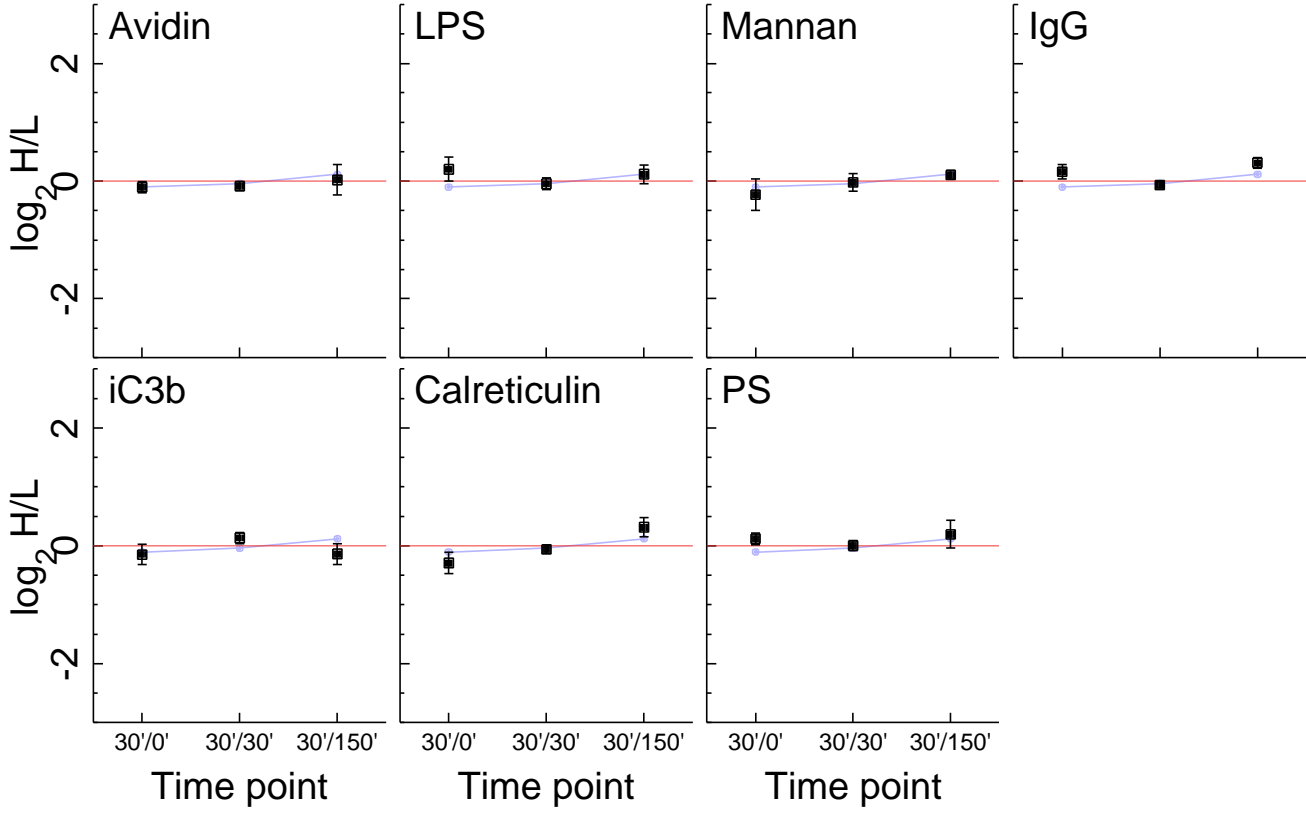

### kiaa0196 (Q8C2E7)

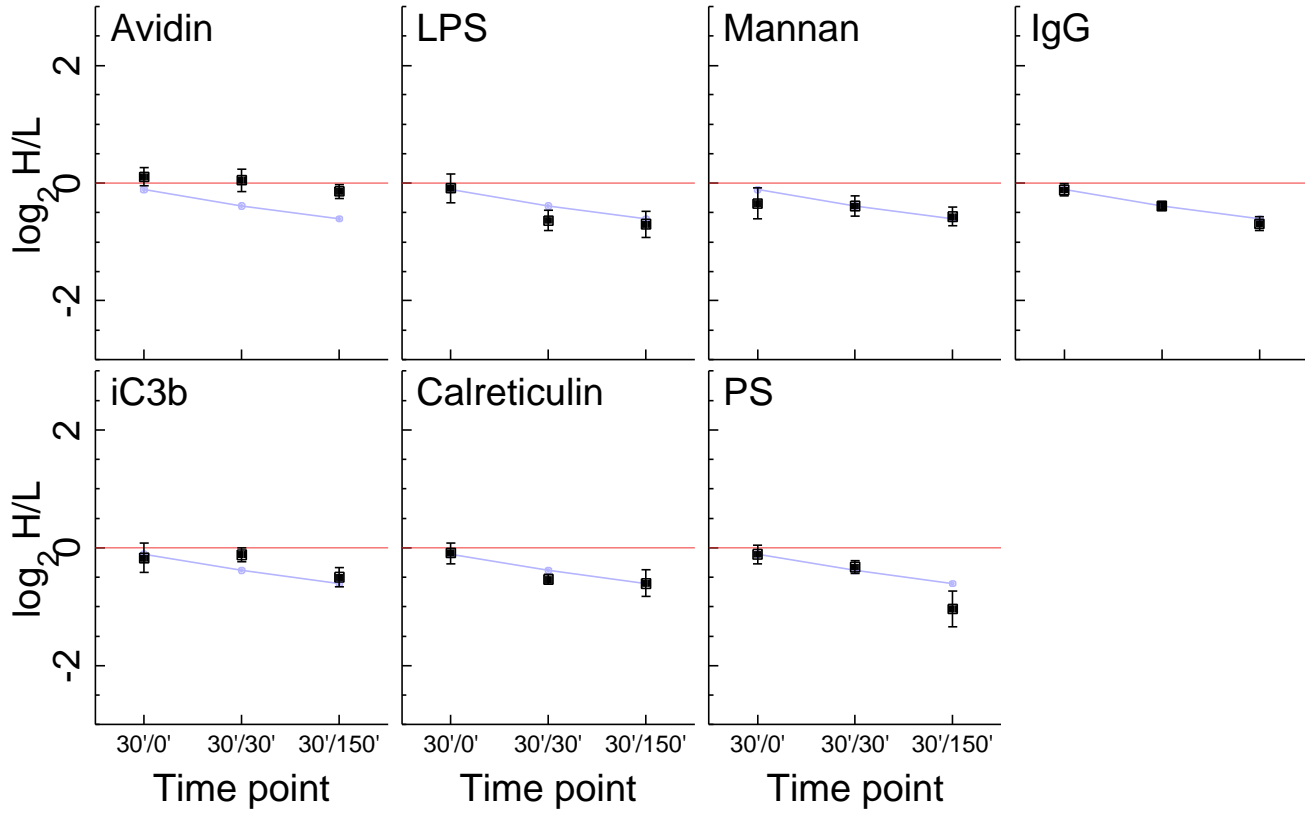



kiaa0226 (Q80U62)

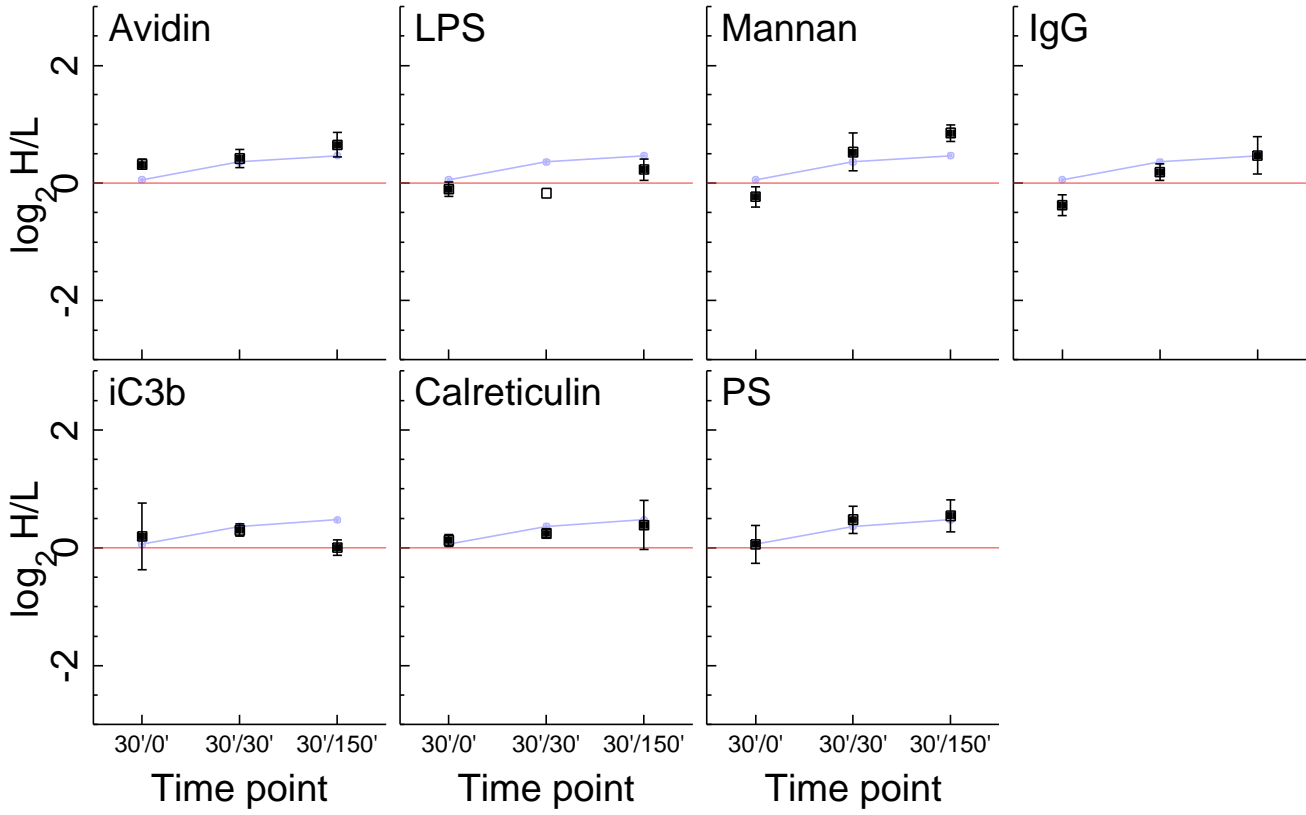

### kiaa0907 (Q3TCX3)

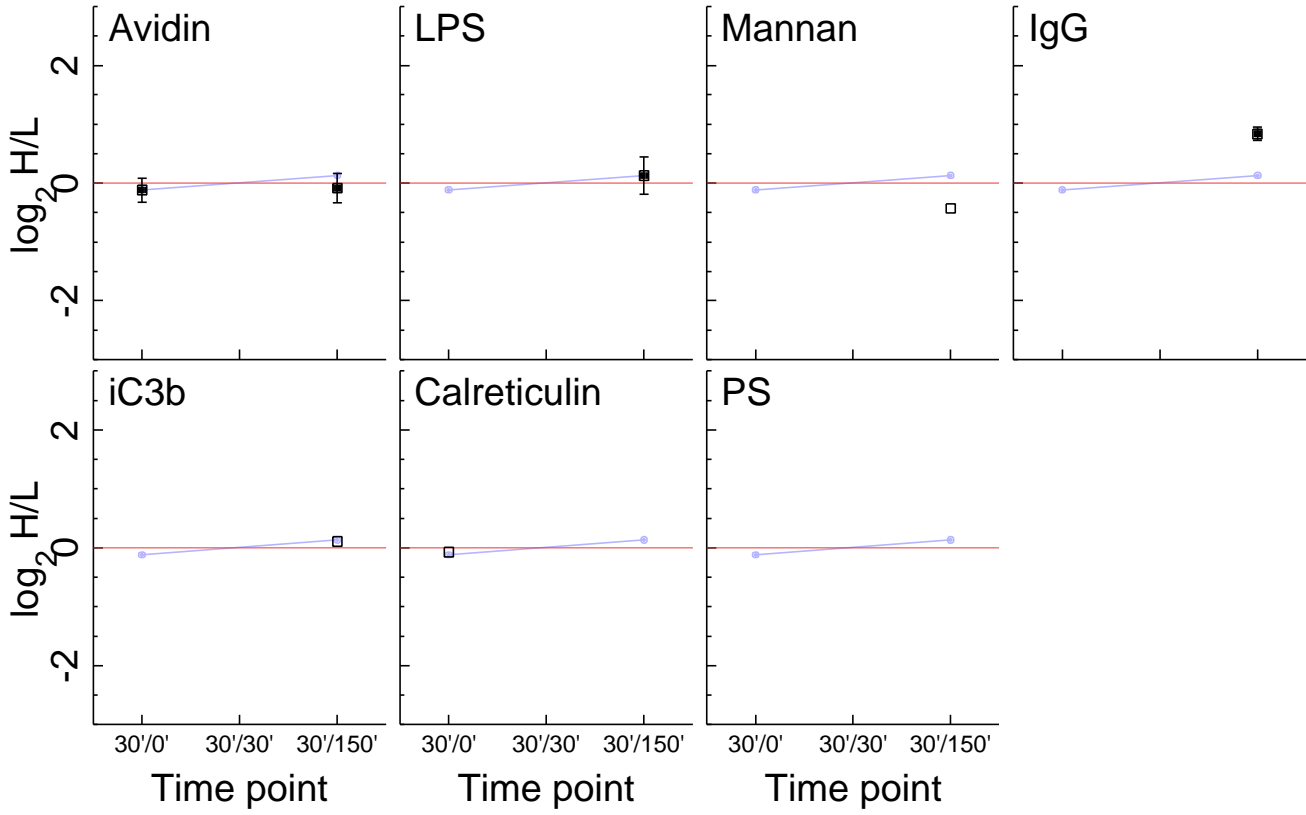

# kiaa1033 (Q3UMB9)

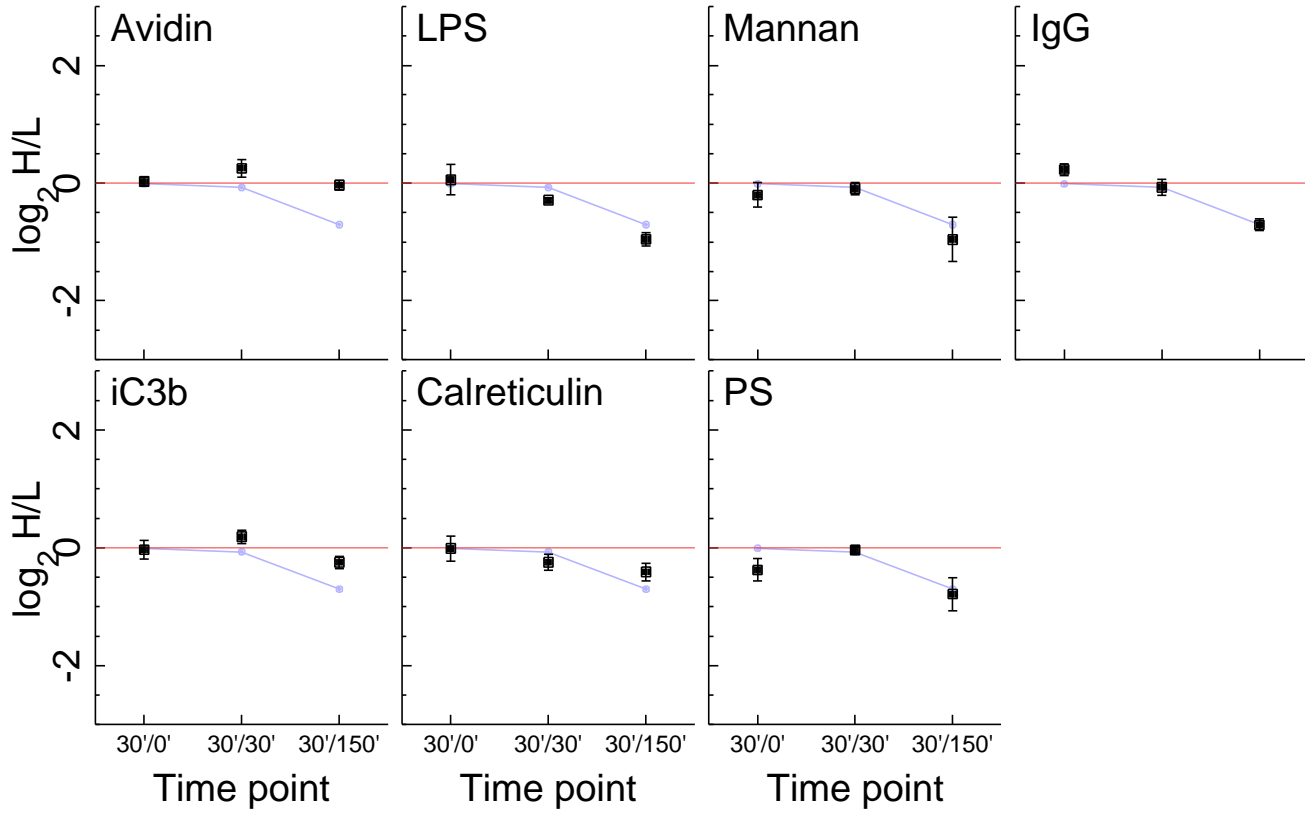

### kiaa1598 (Q8K2Q9)

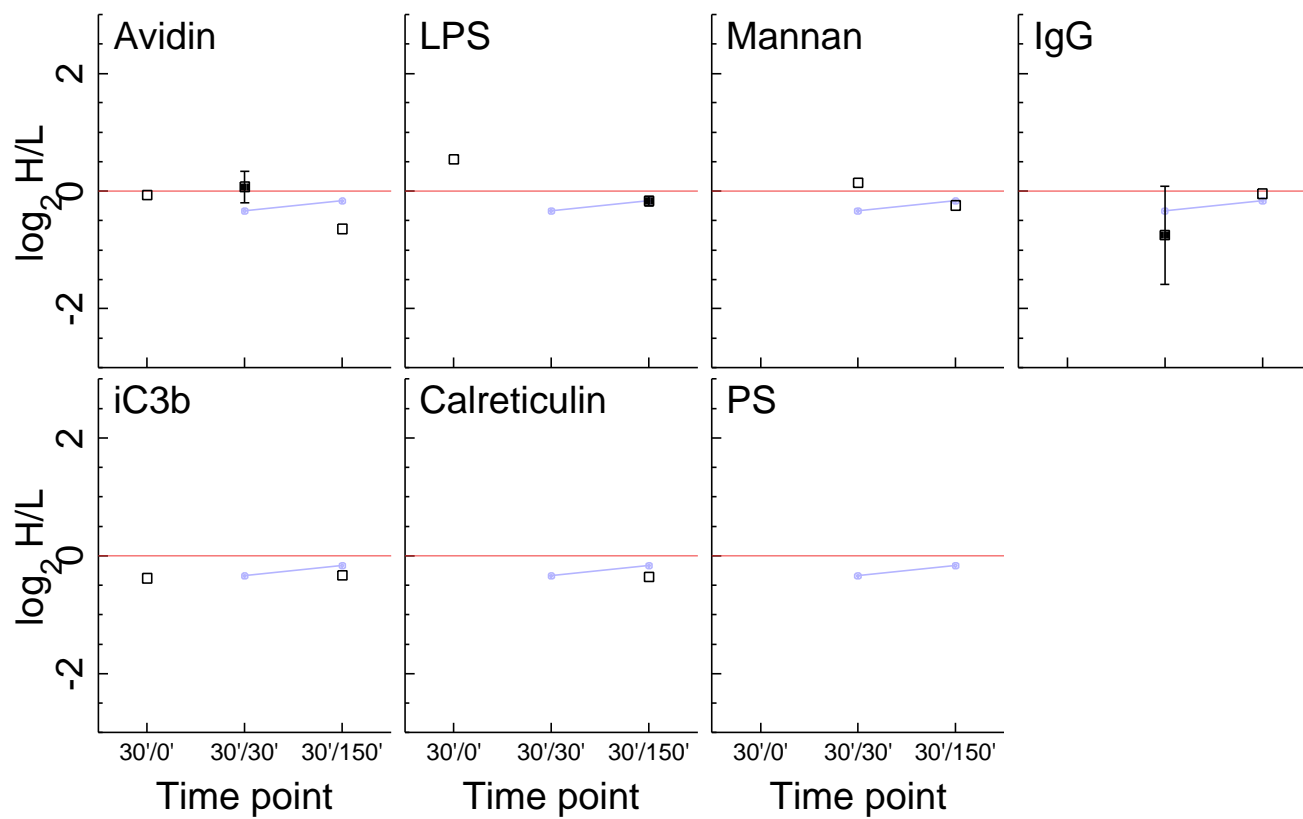

### kiaa1671 (Q8BRV5)

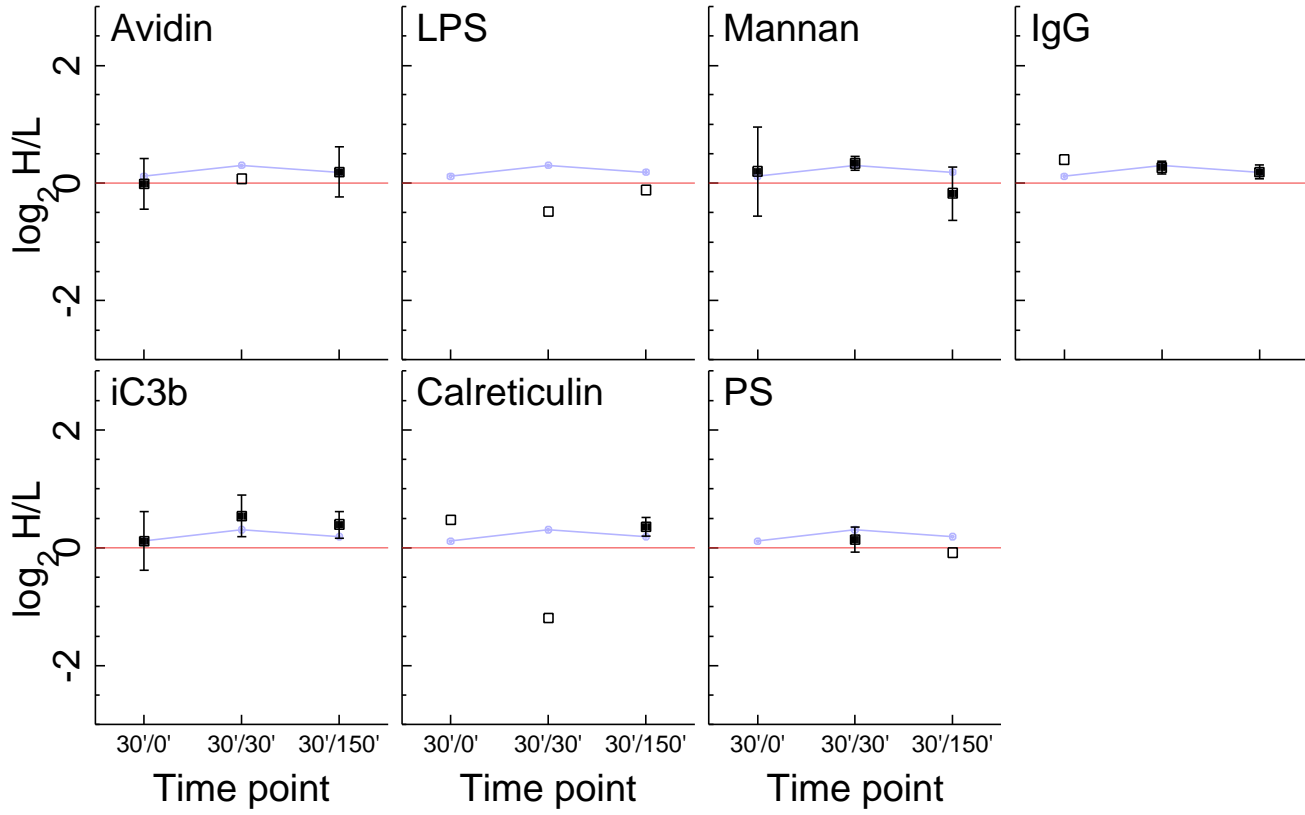

### kif13b (E9Q4K7)

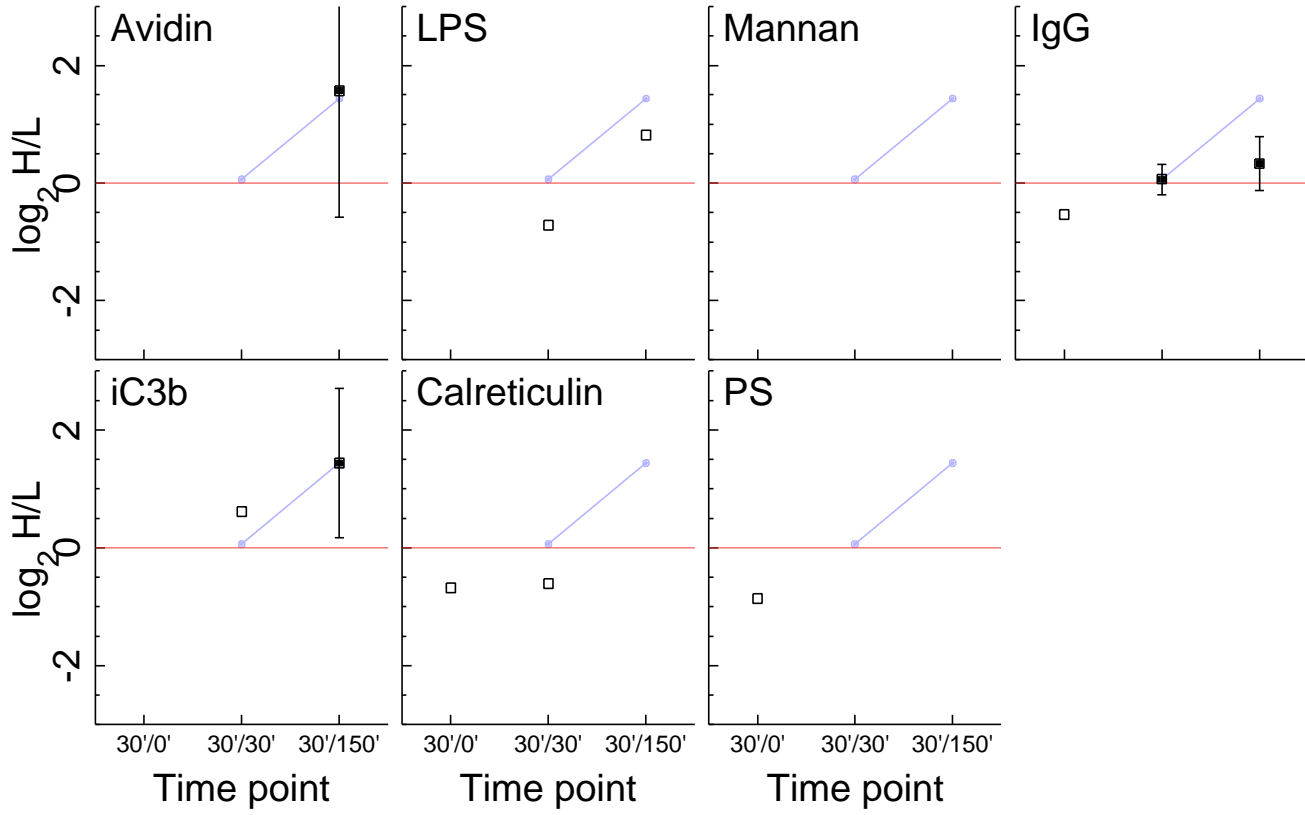

### kif16b (B1AVY7)

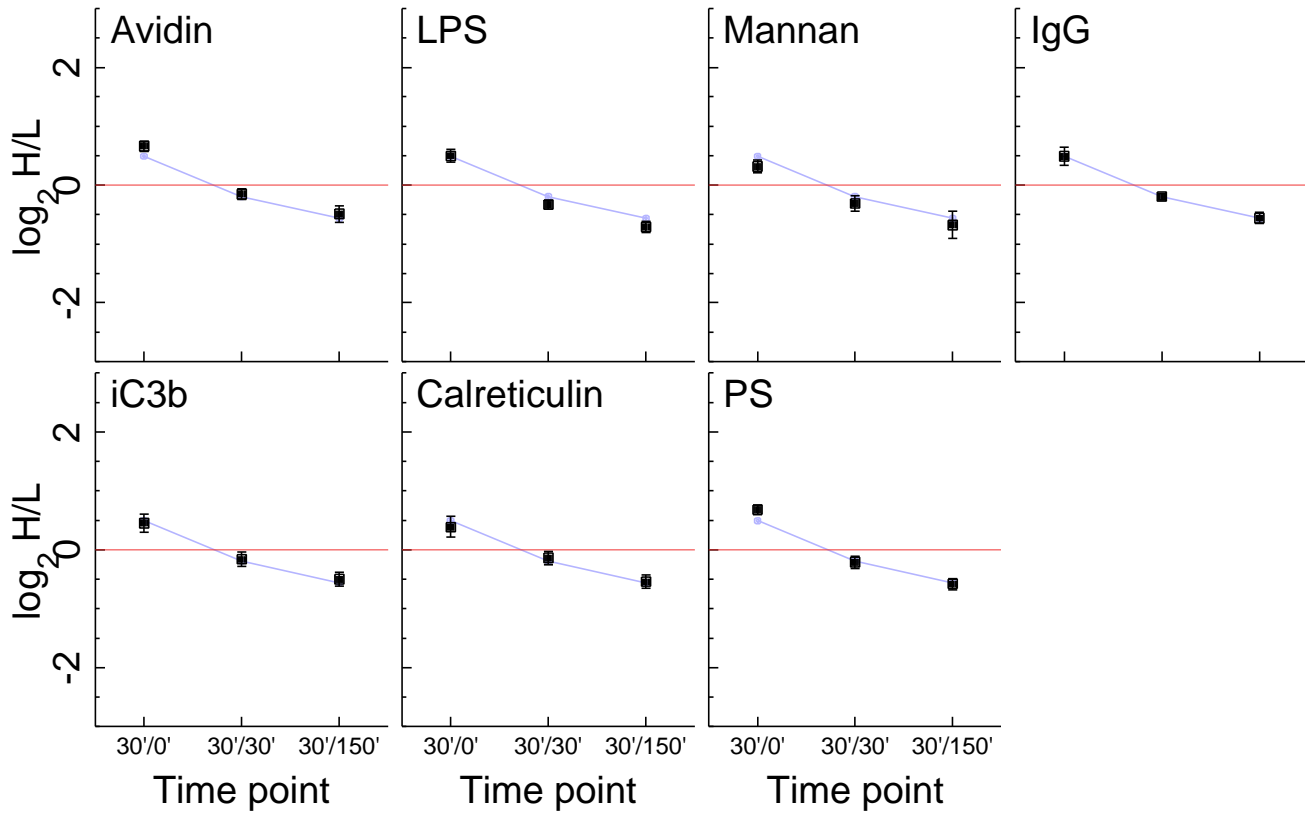

### kif1a (Q6TA13)

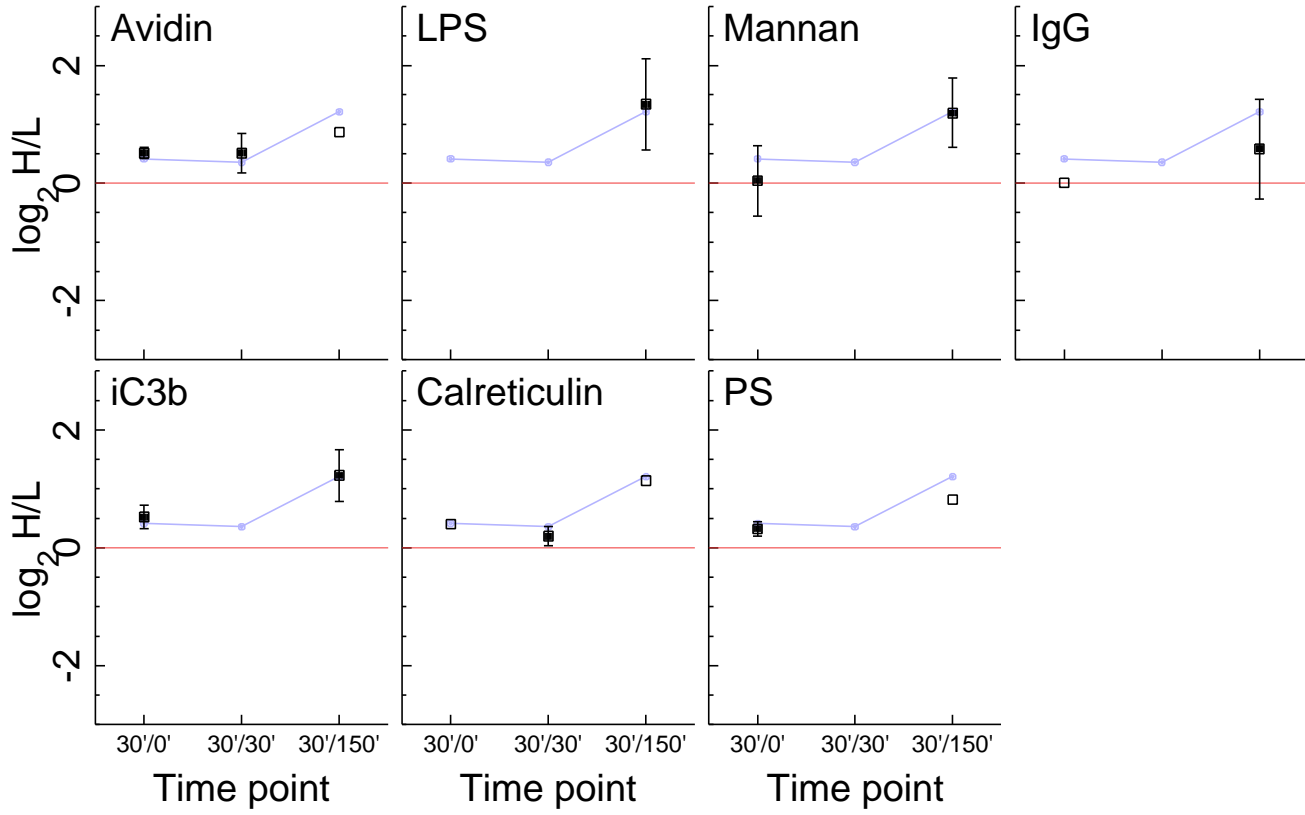



kif5b (Q61768)

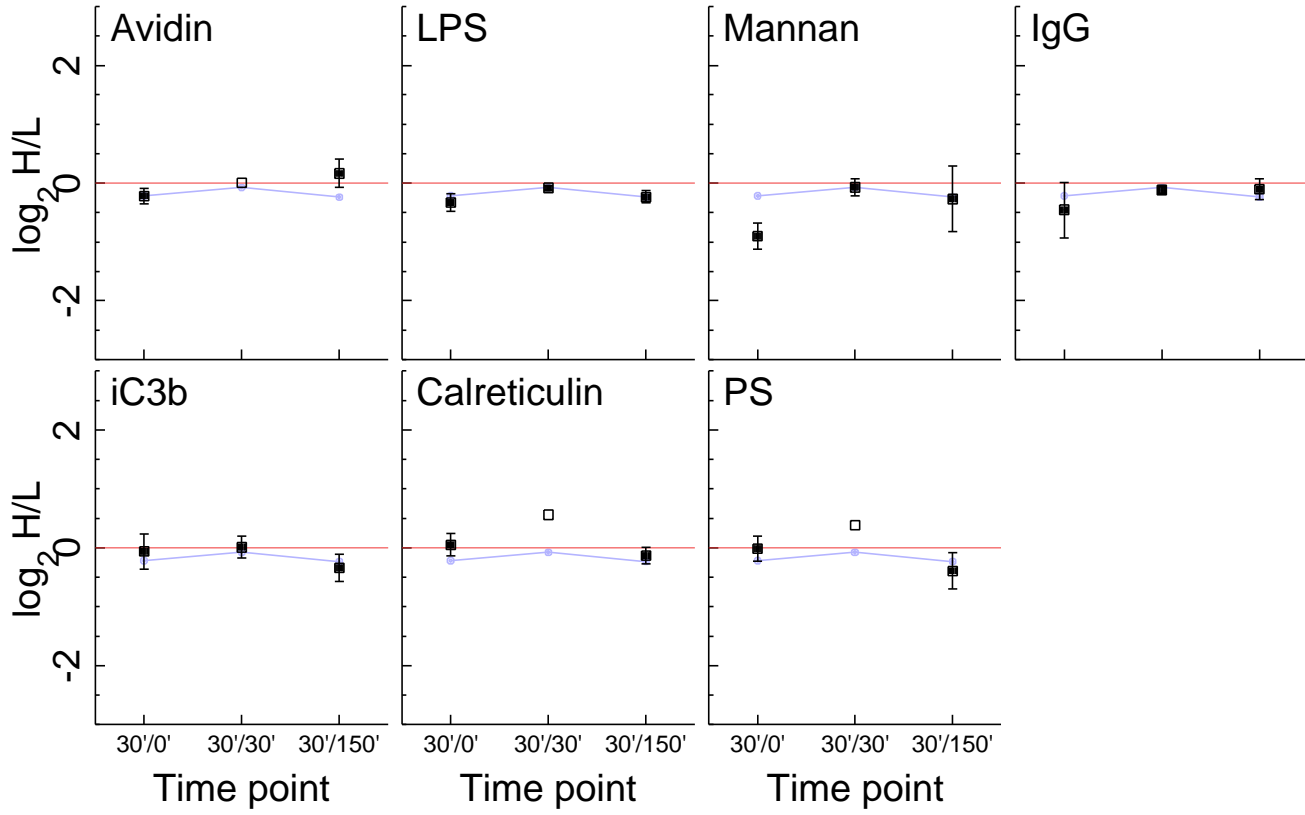

### kpnb1 (P70168)

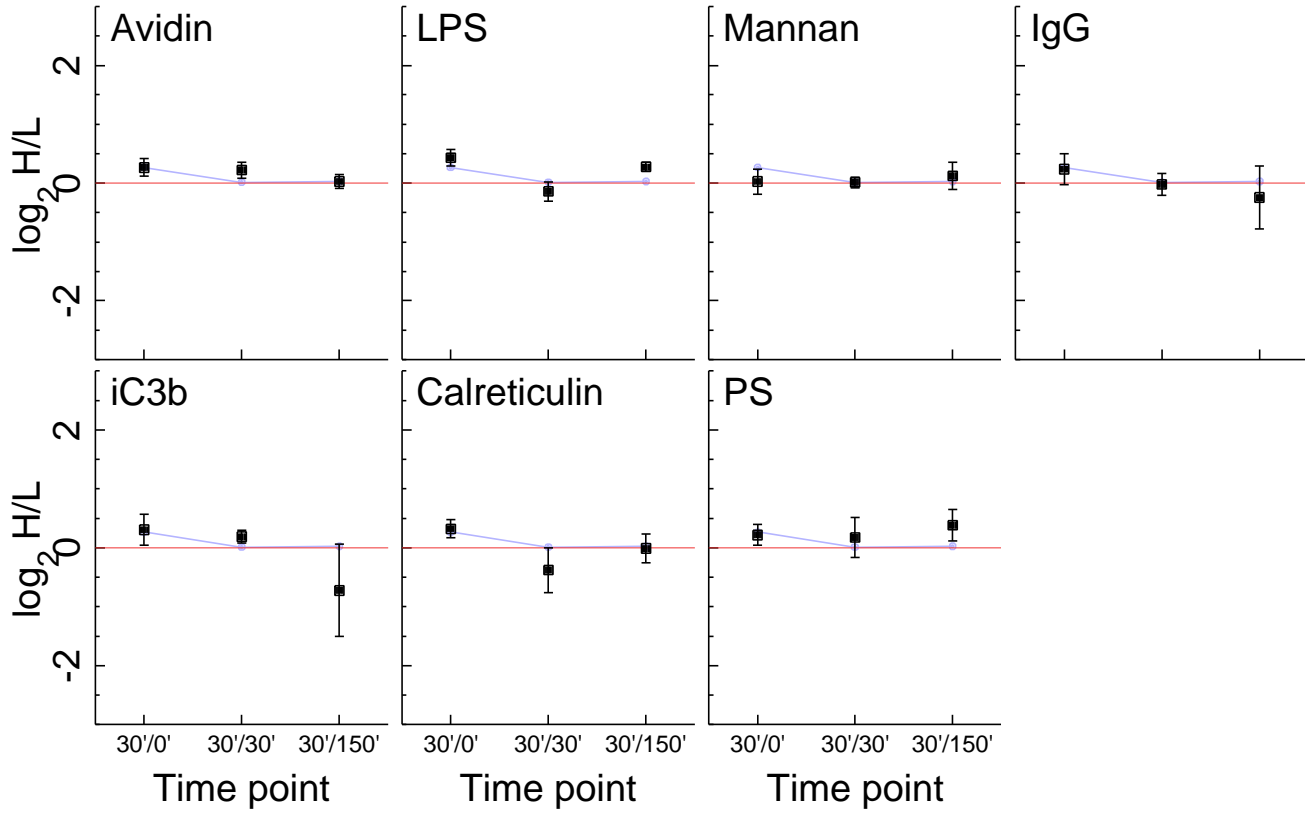

kras (P32883)

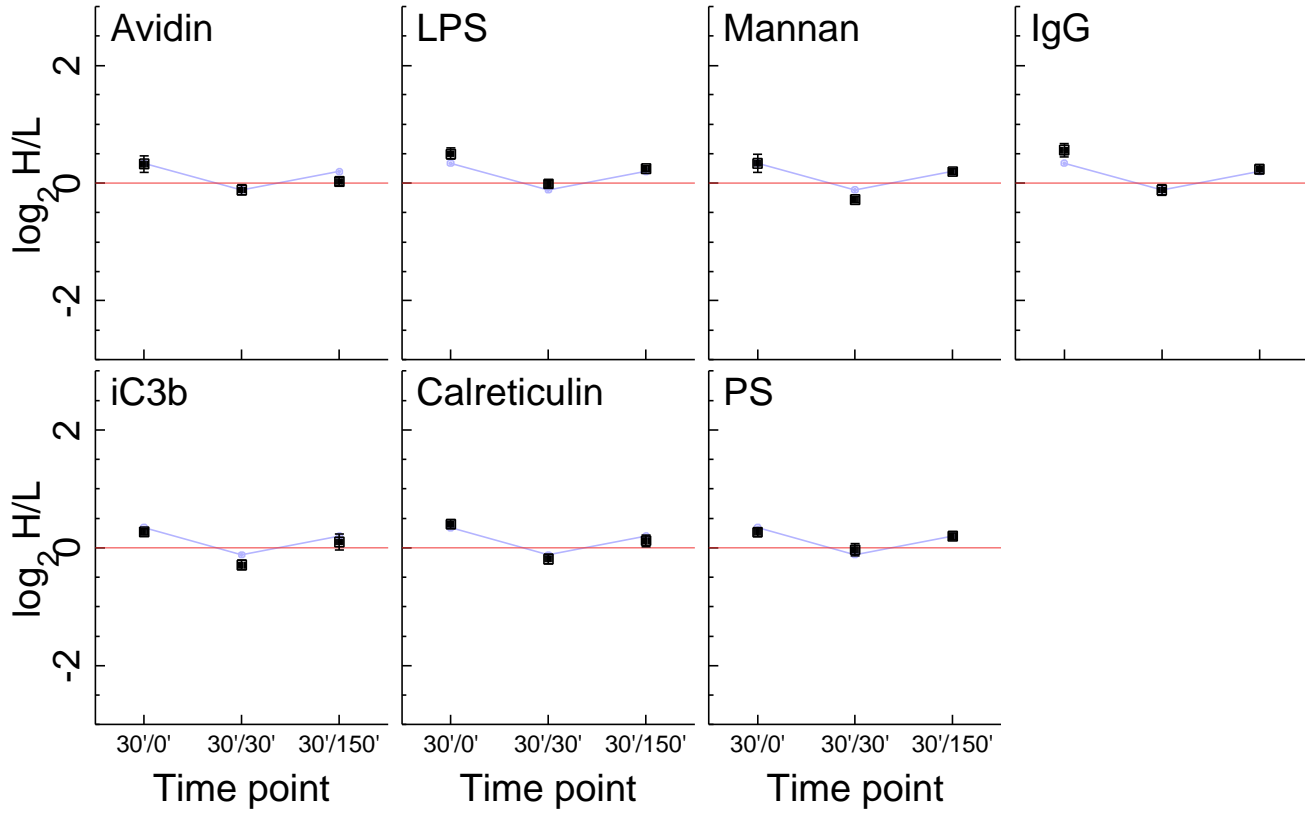

### krt28 (A6BLY7)

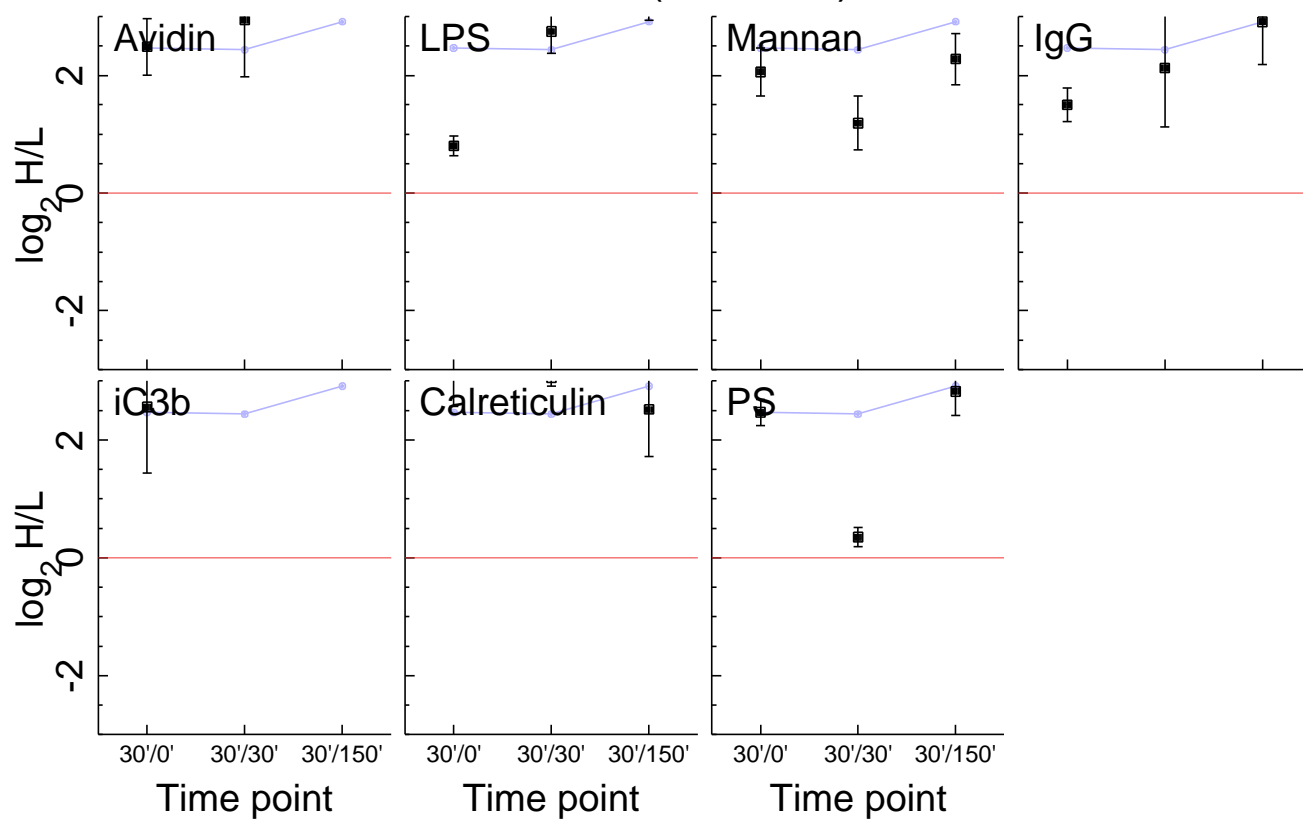

krt76 (Q3UV17)

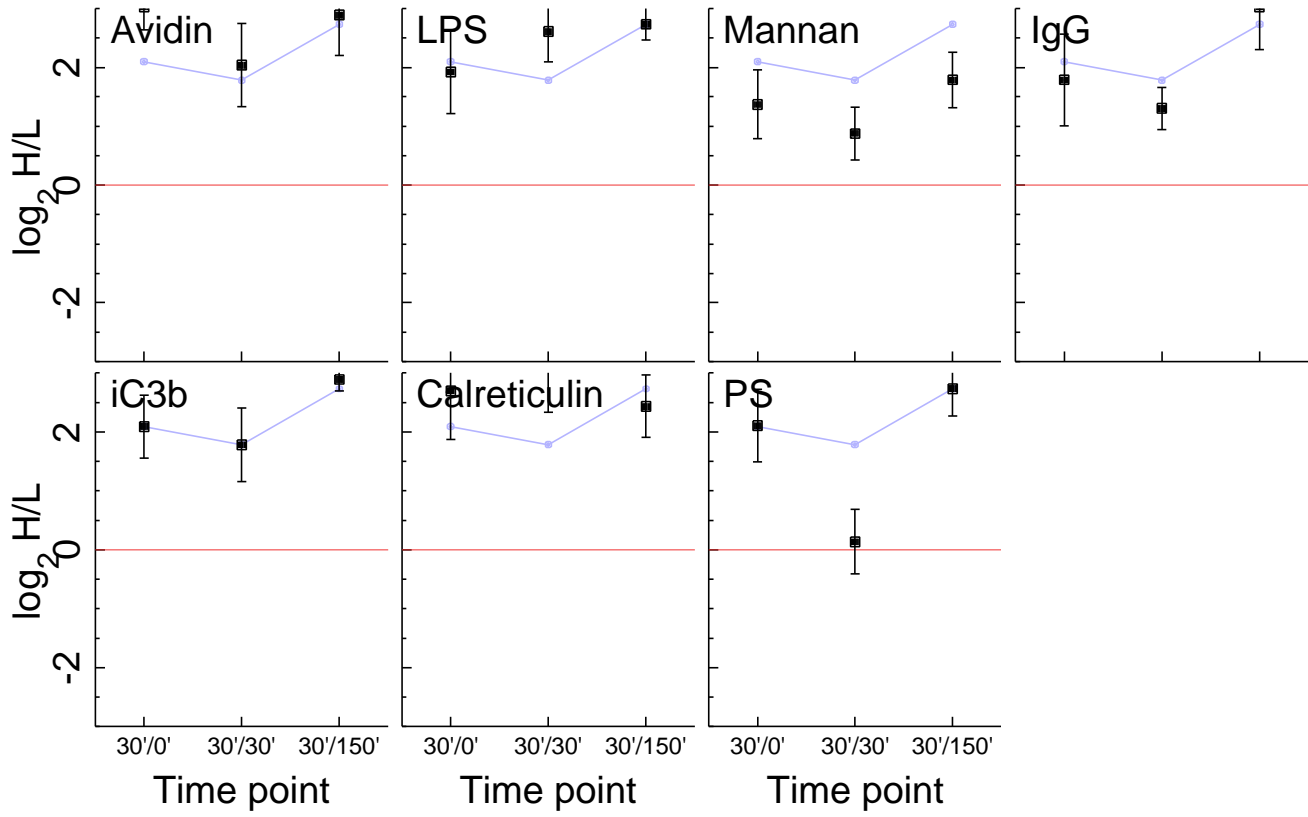

### lamp1 (P11438)

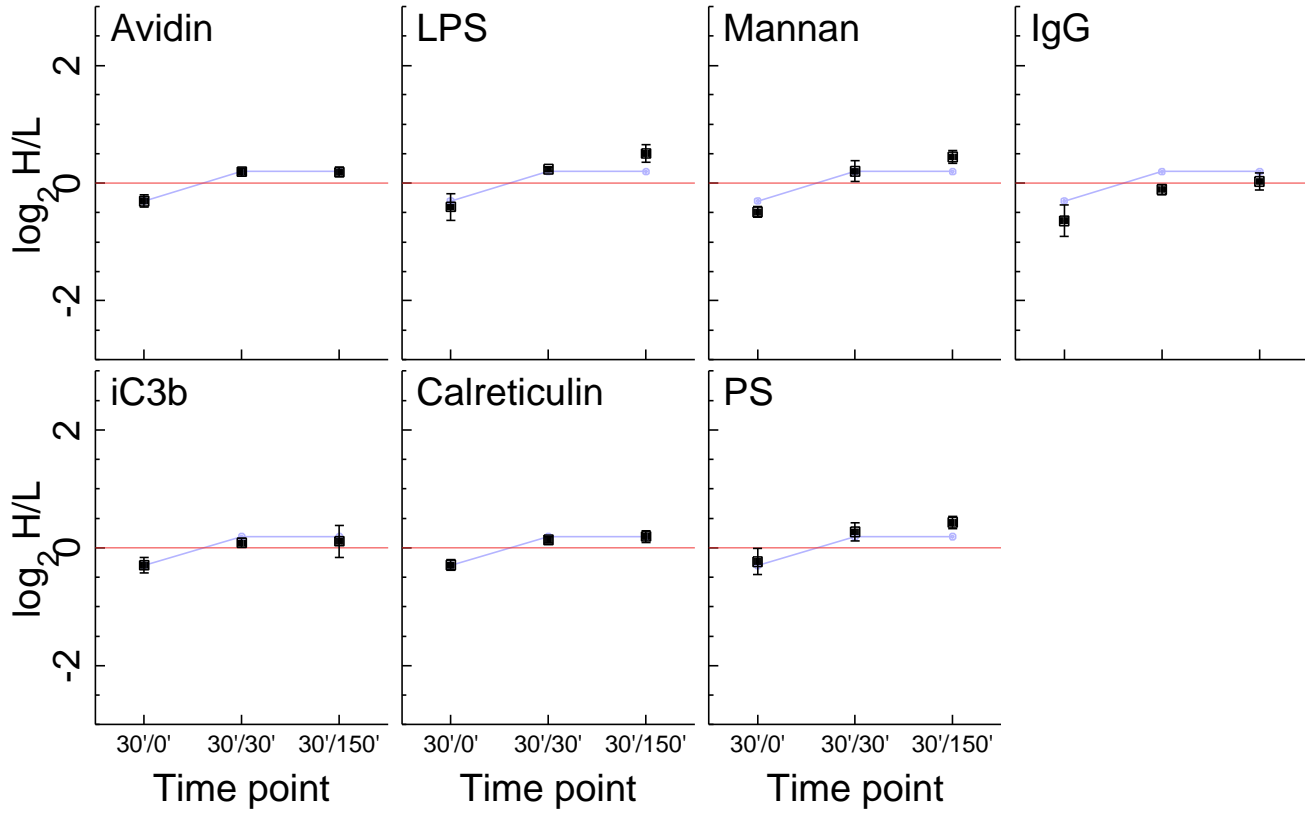

### lamtor1 (Q9CQ22)

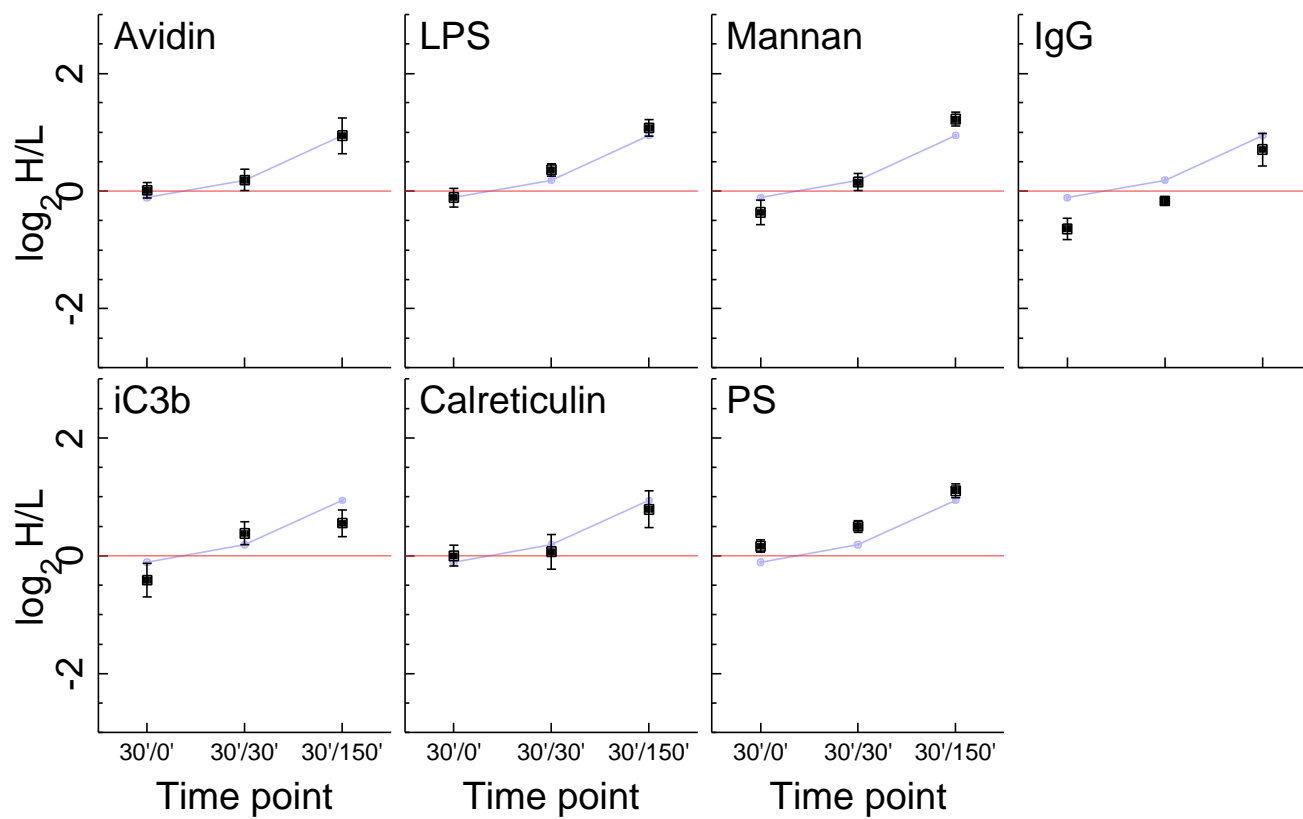

### lamtor2 (Q9JHS3)

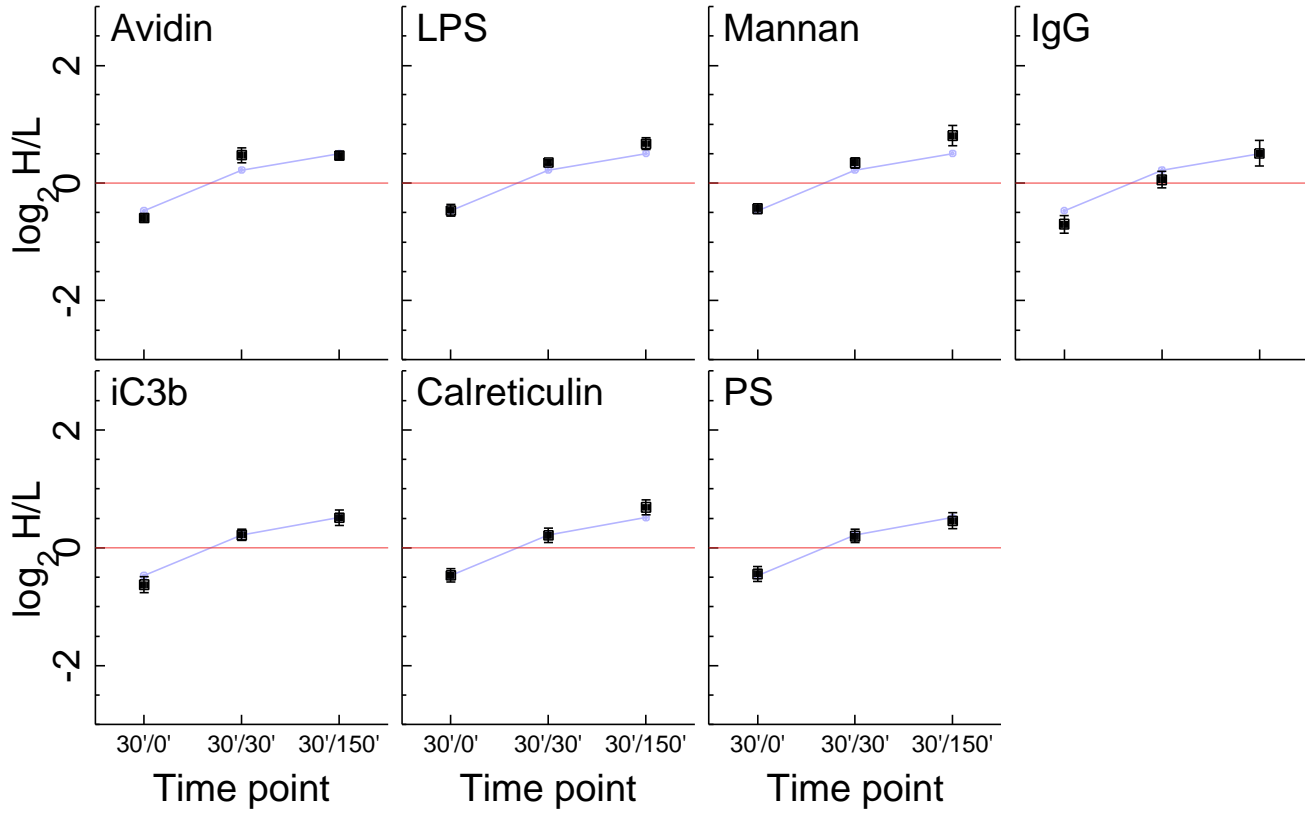



# lamtor3 (O88653)

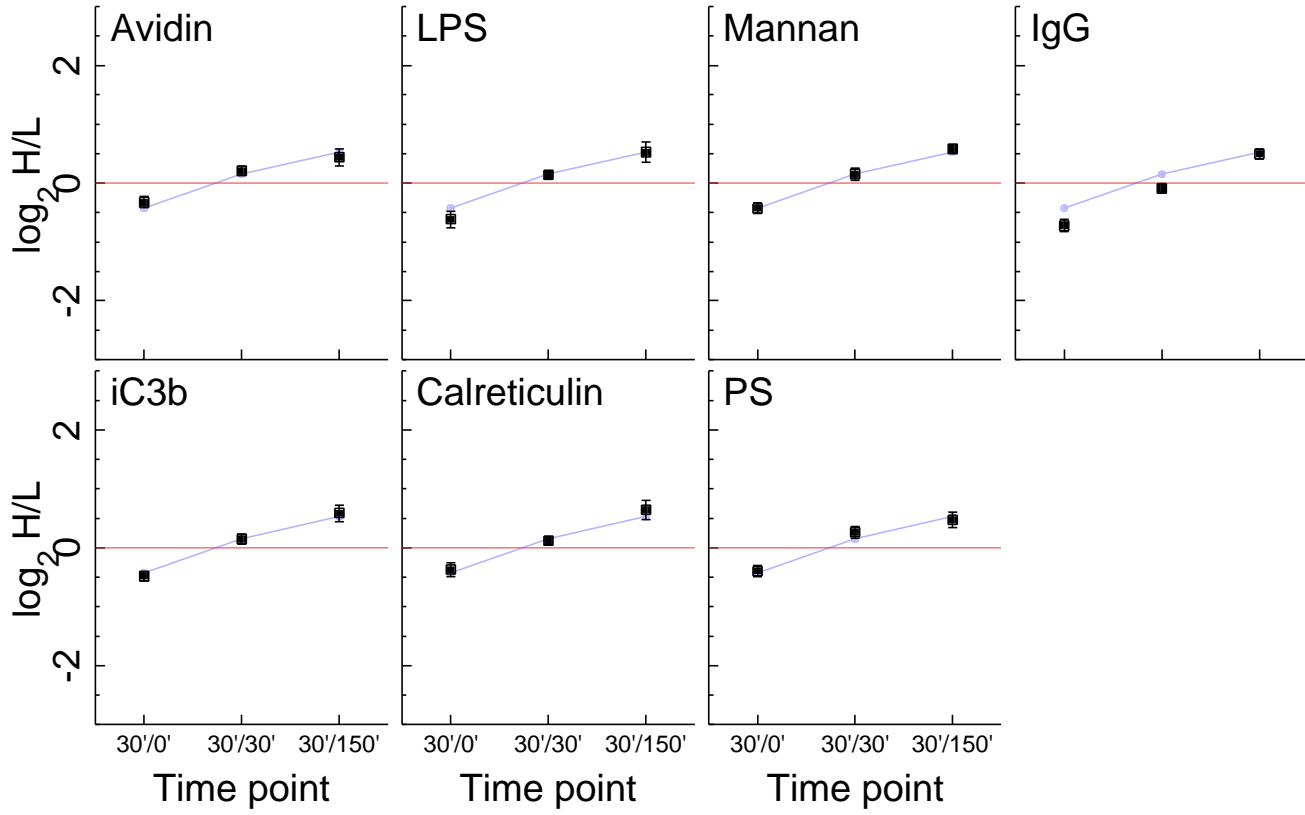

# lancl1 (O89112)

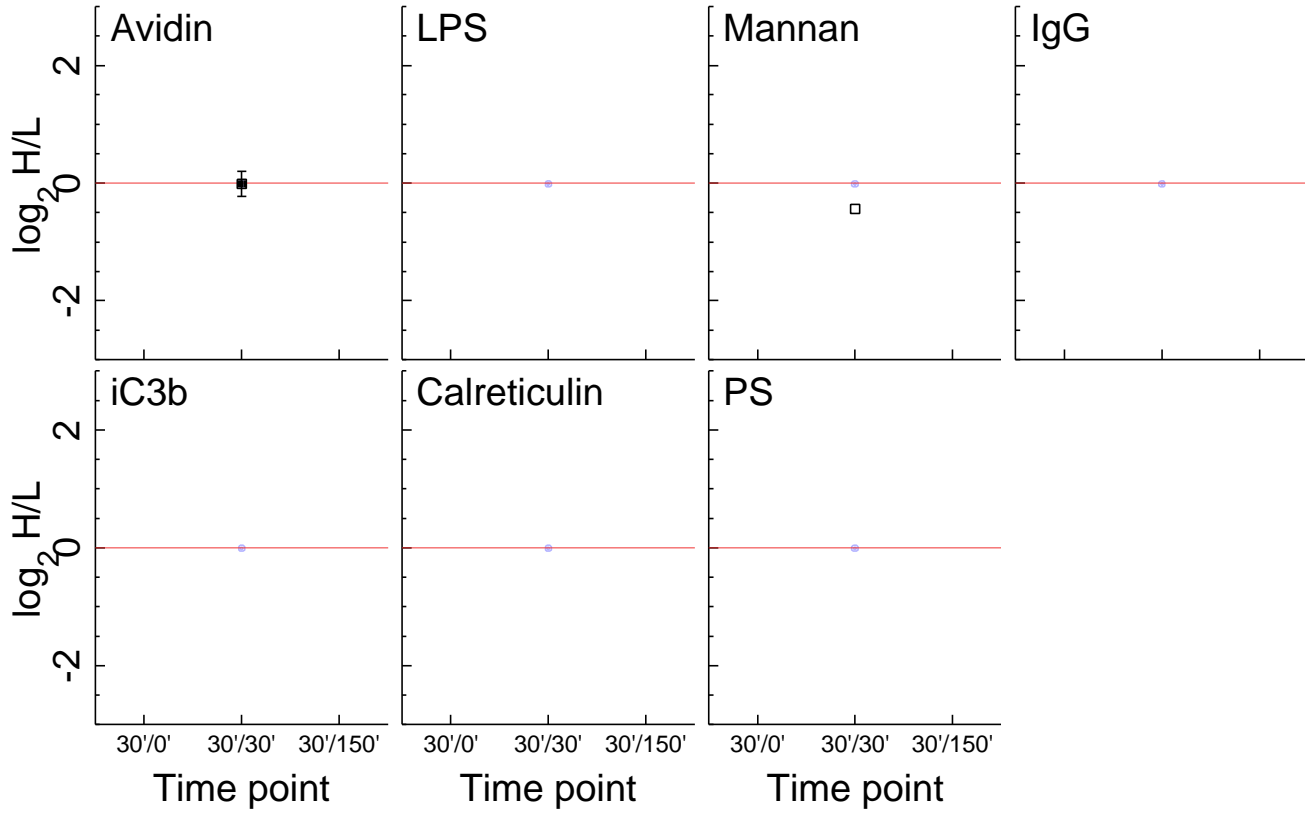

# laptm5 (F8WH95)

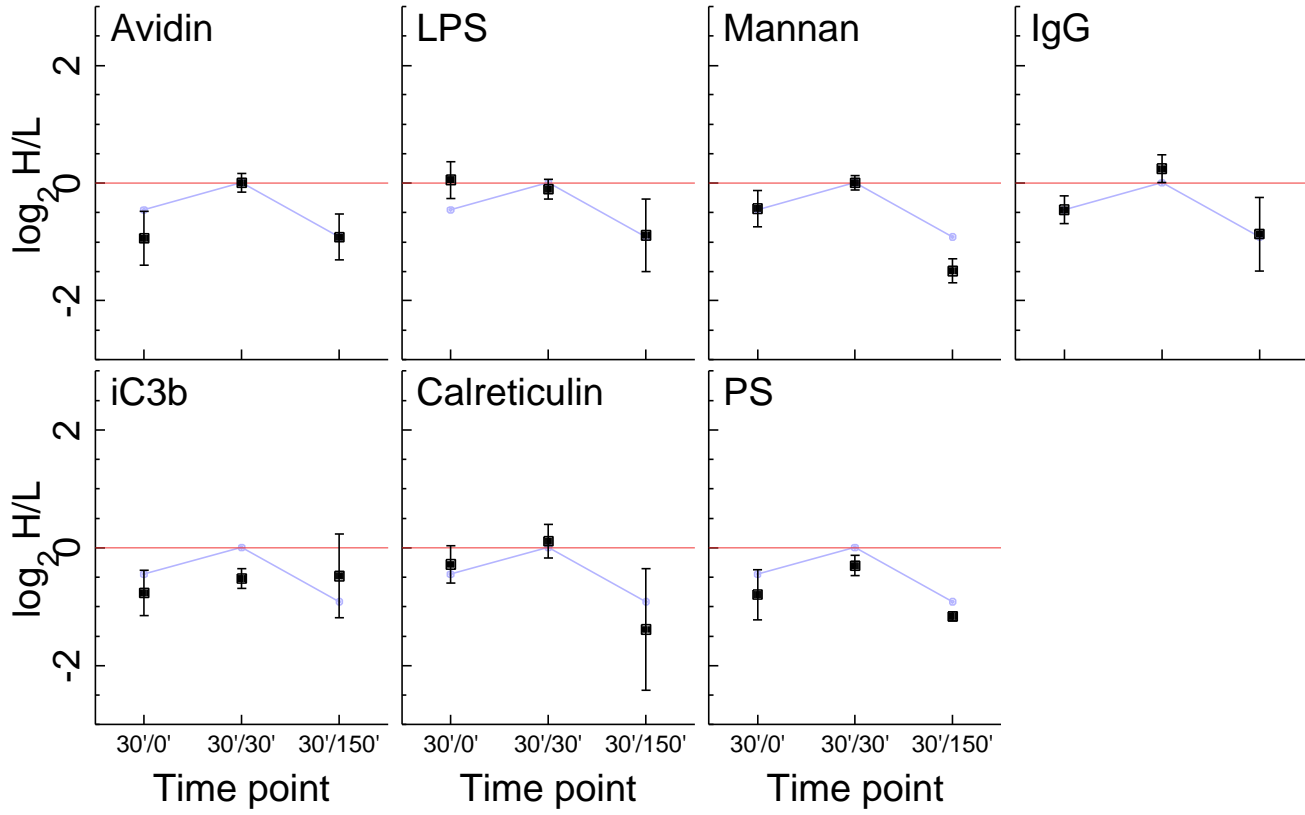

# iasp1 (Q61792)

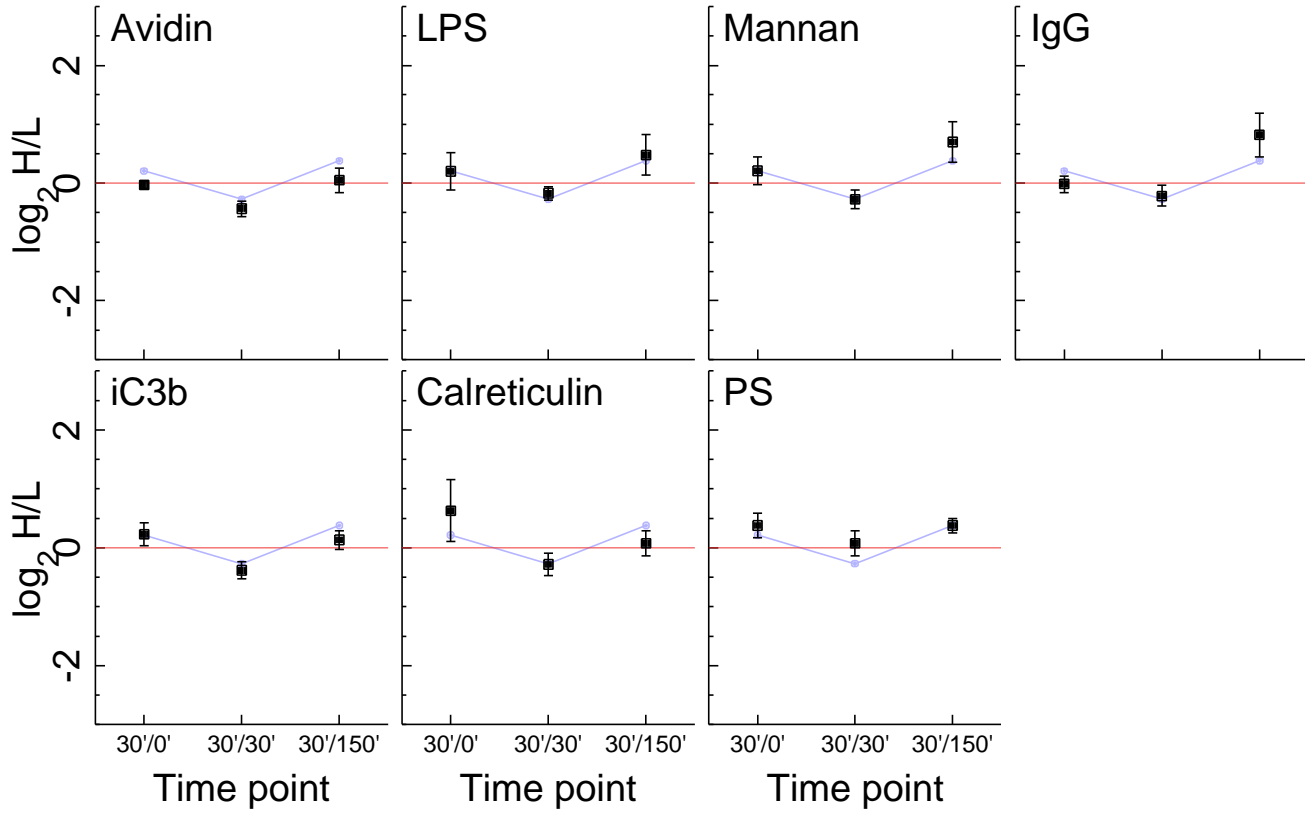

### lat2 (Q9JHL0)

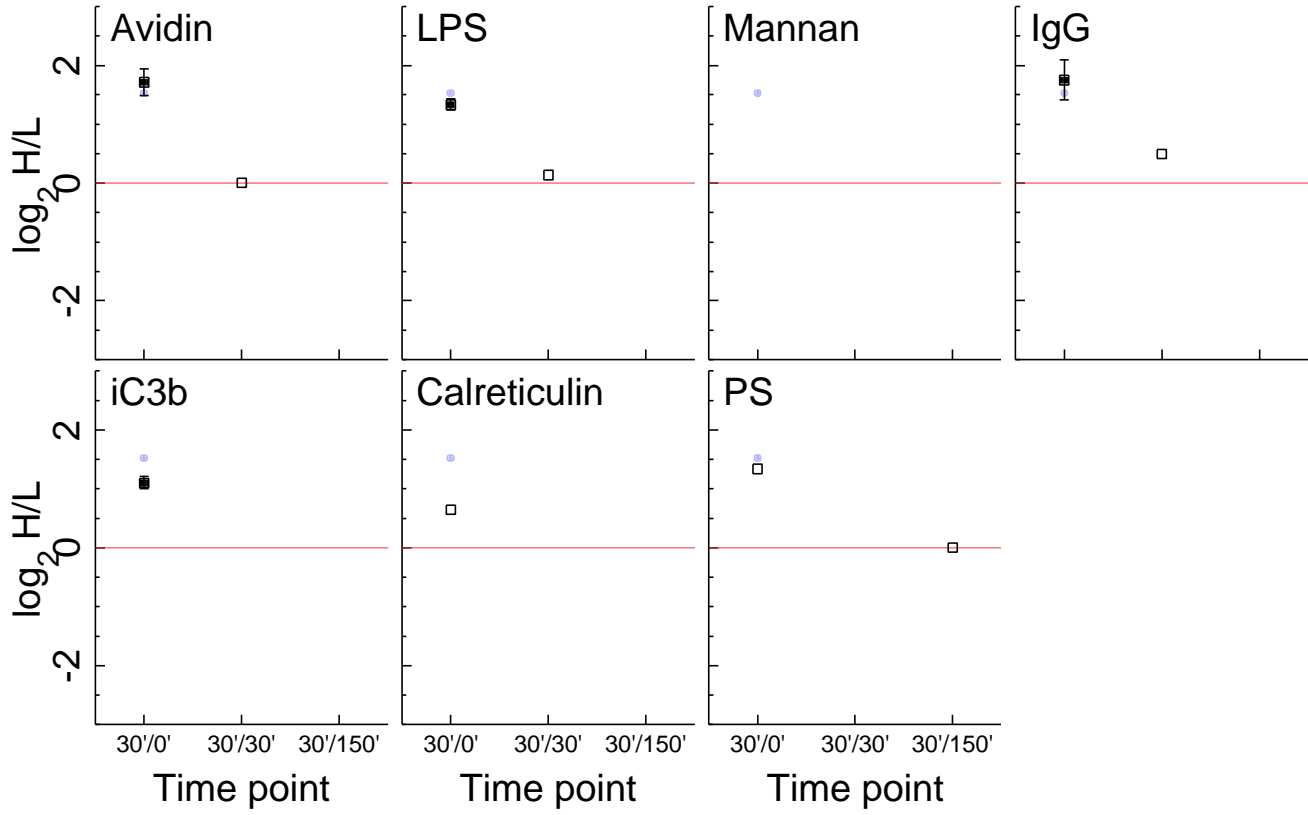

### Ibr (Q3U9G9)

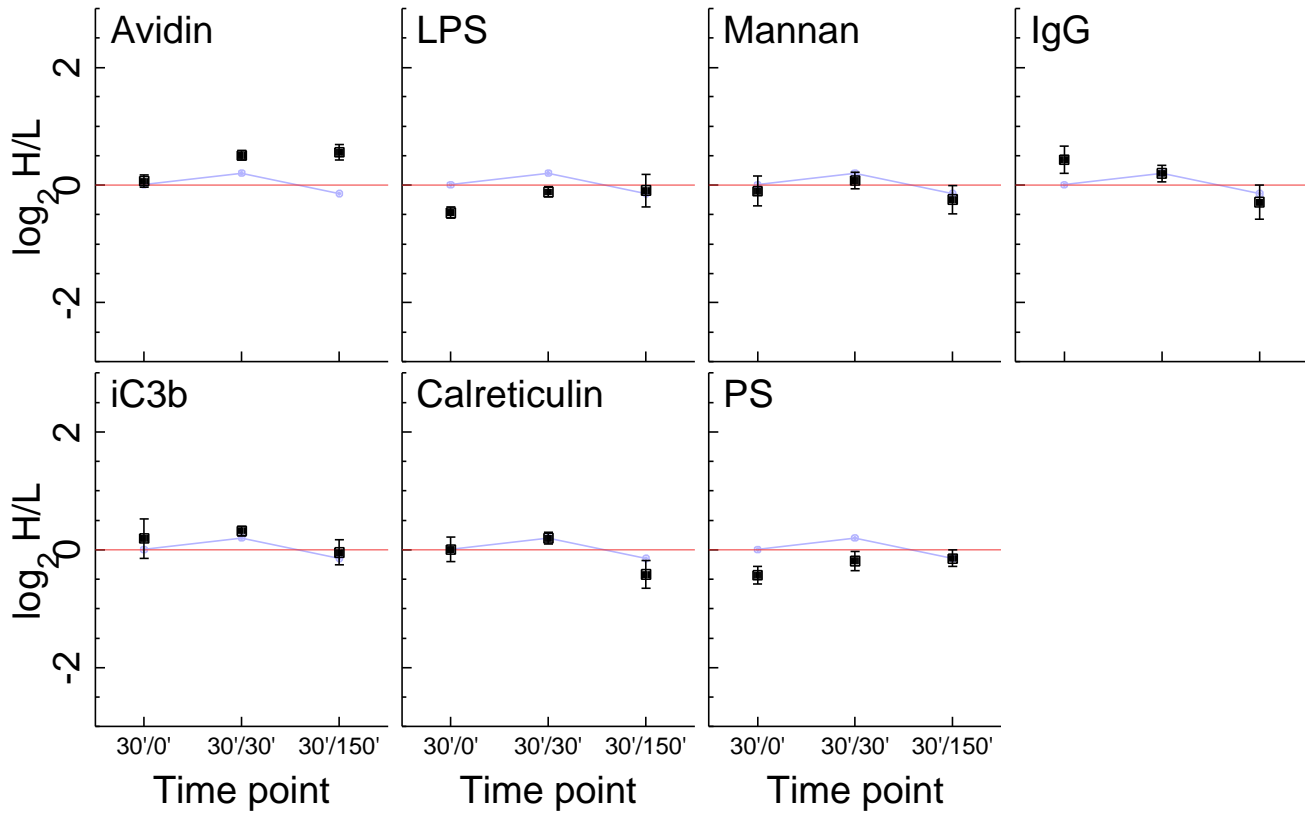

### Icp1 (Q61233)

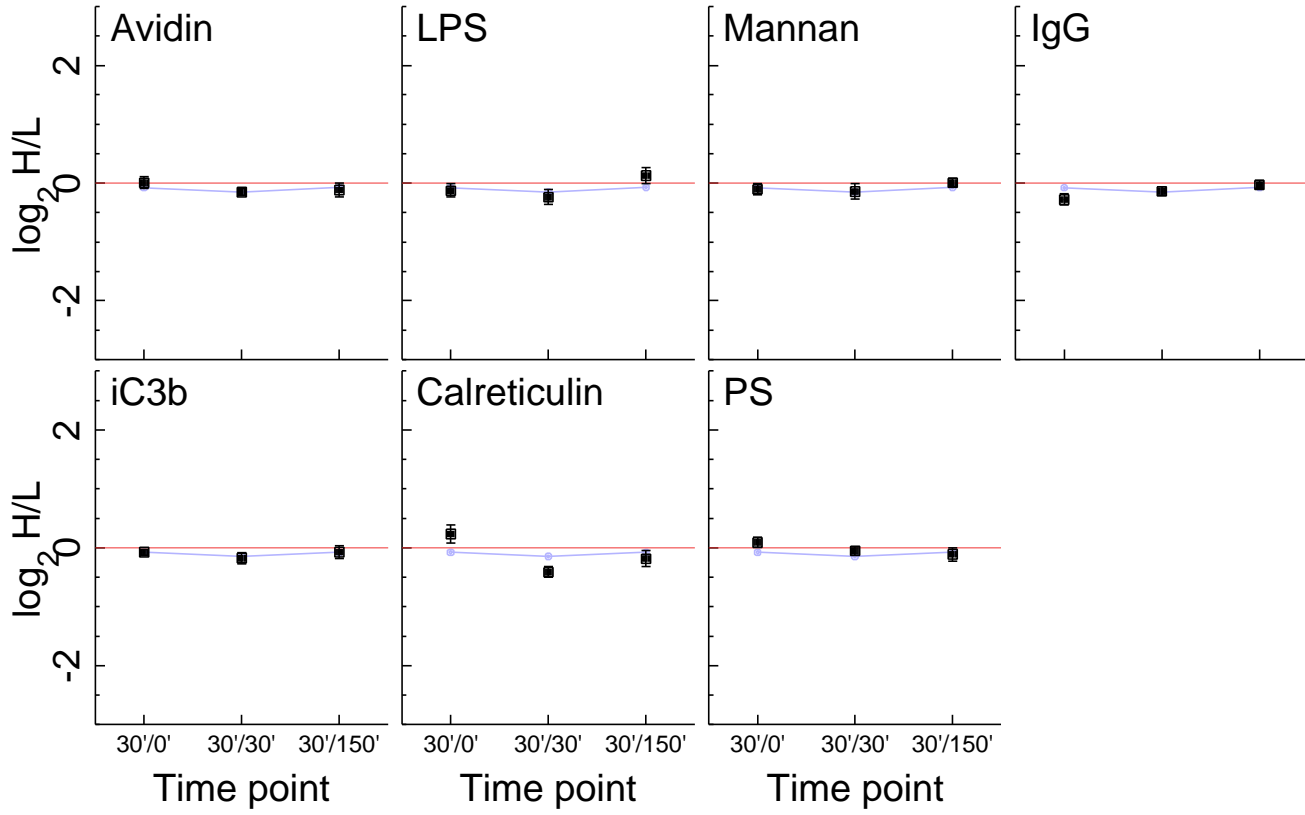

### Icp2 (B1ATD2)

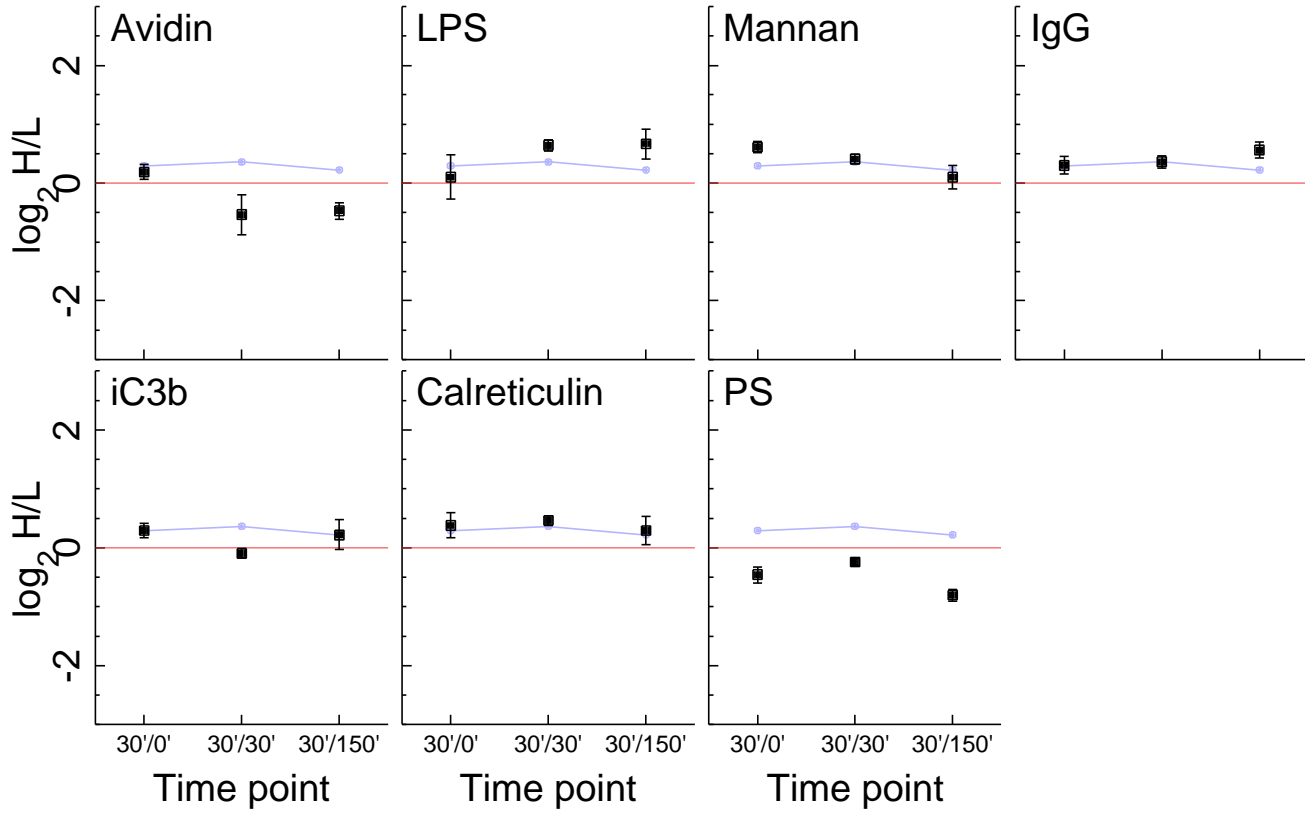



### Idha (G5E8N5)

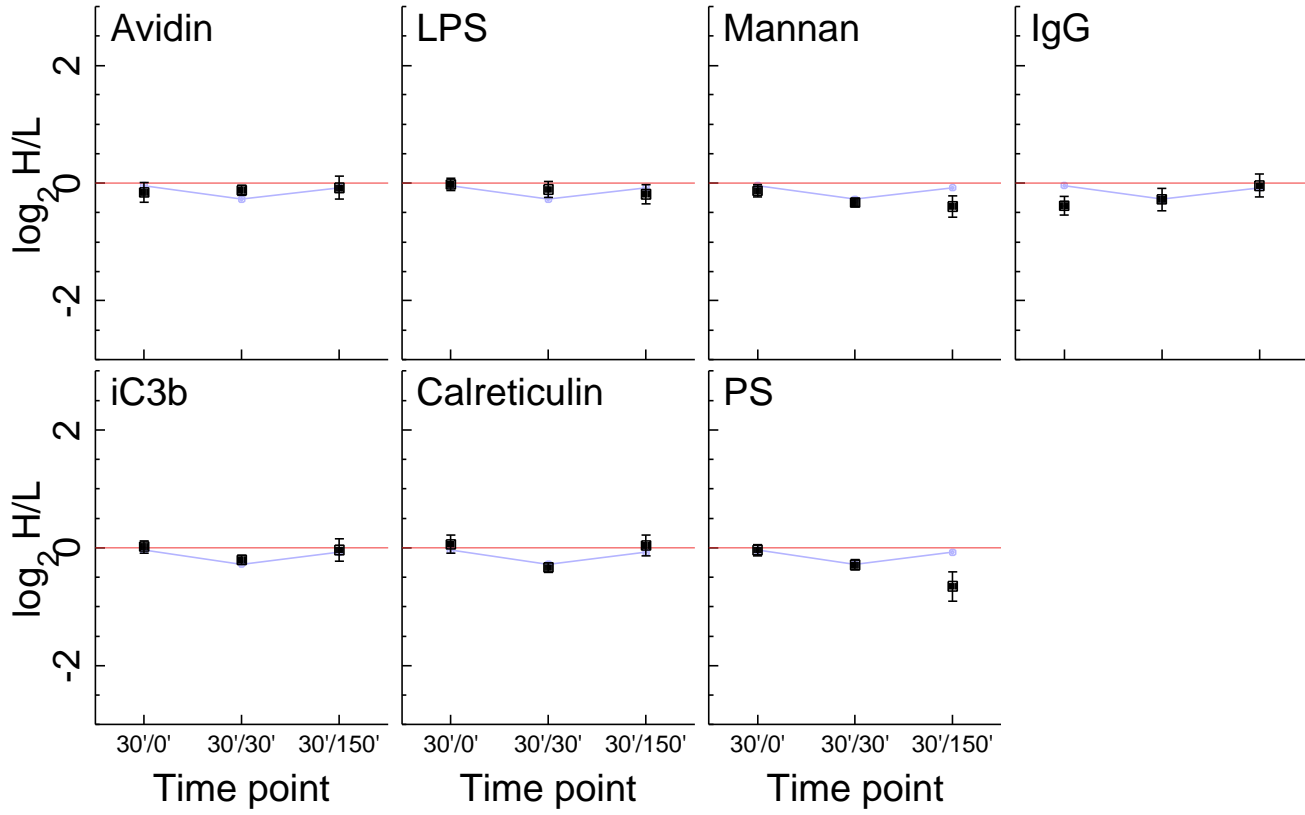

### Idlr (Q6GTJ9)

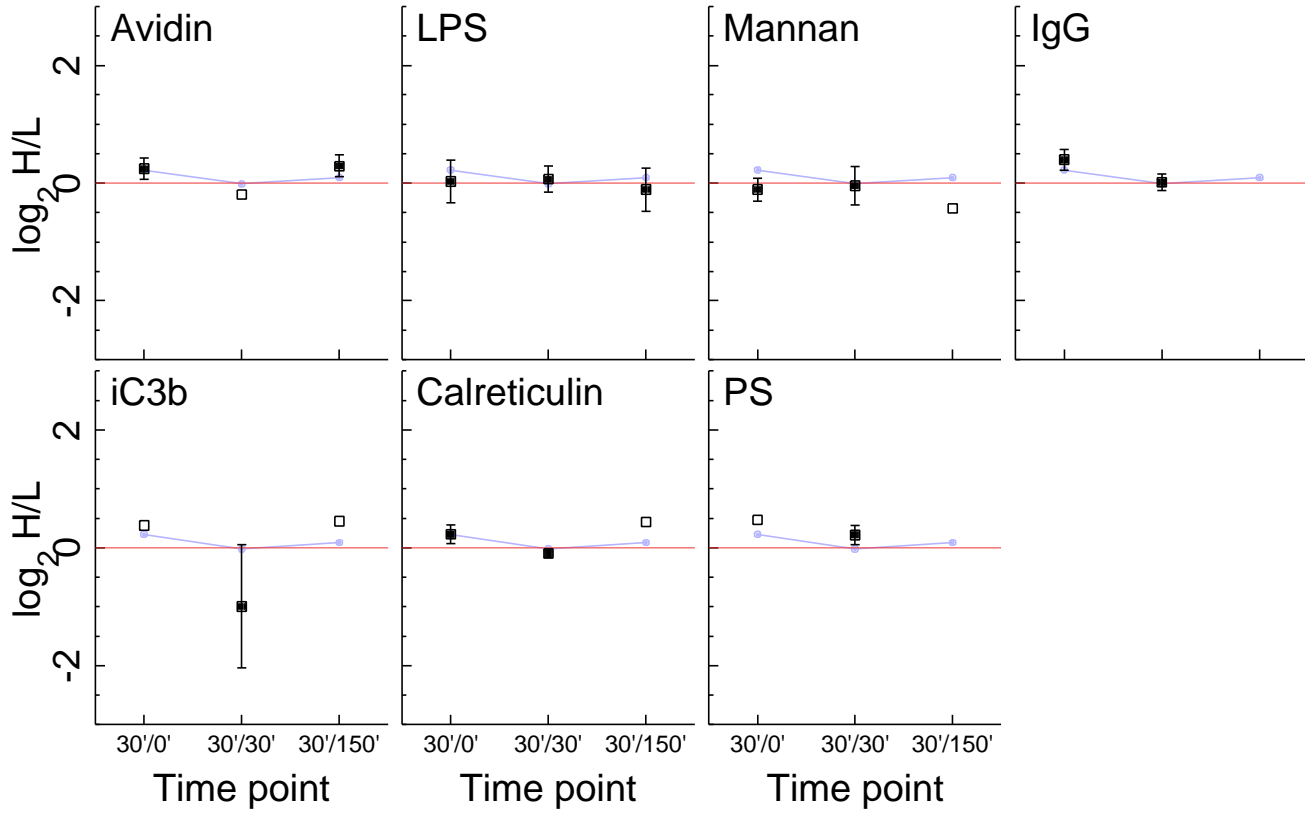

# Igals1 (P16045)

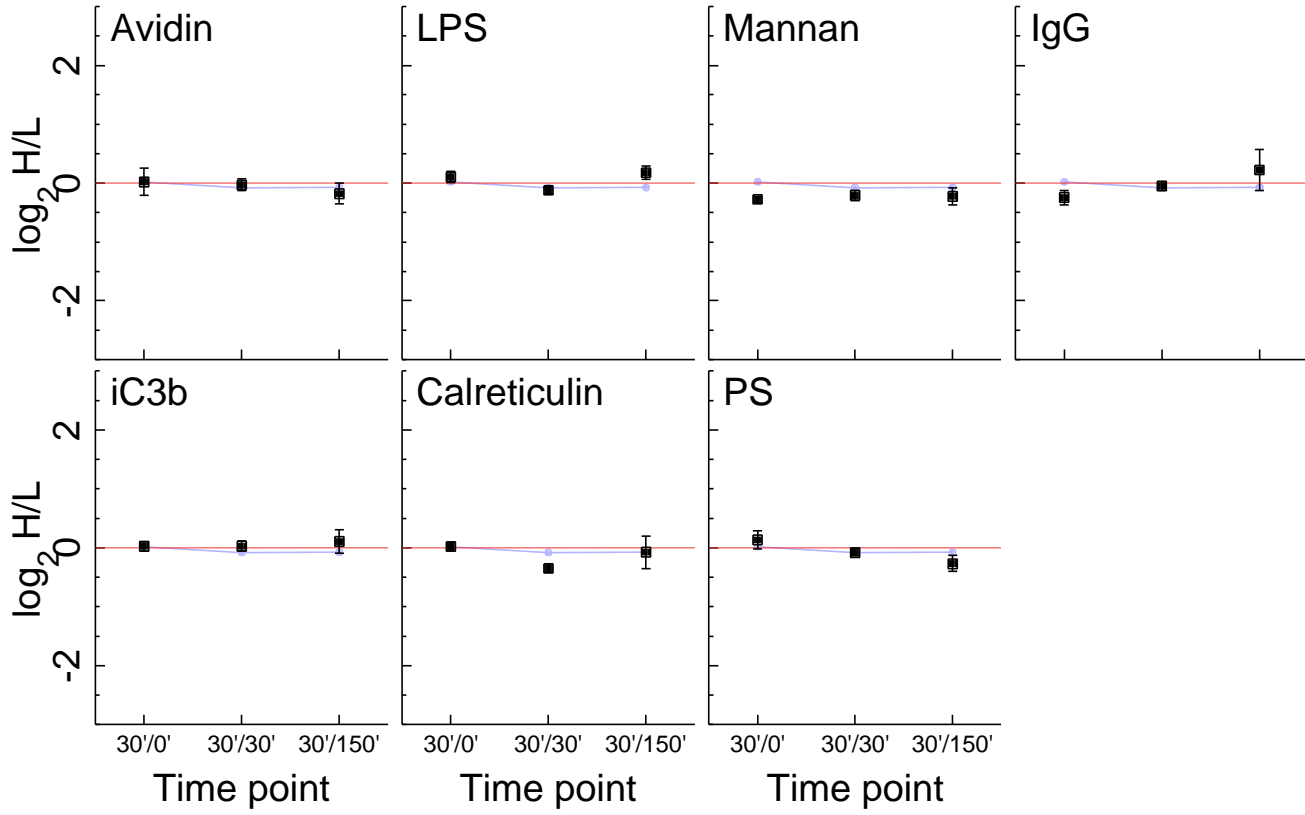

### Igals3bp:1 (F6VRP8)

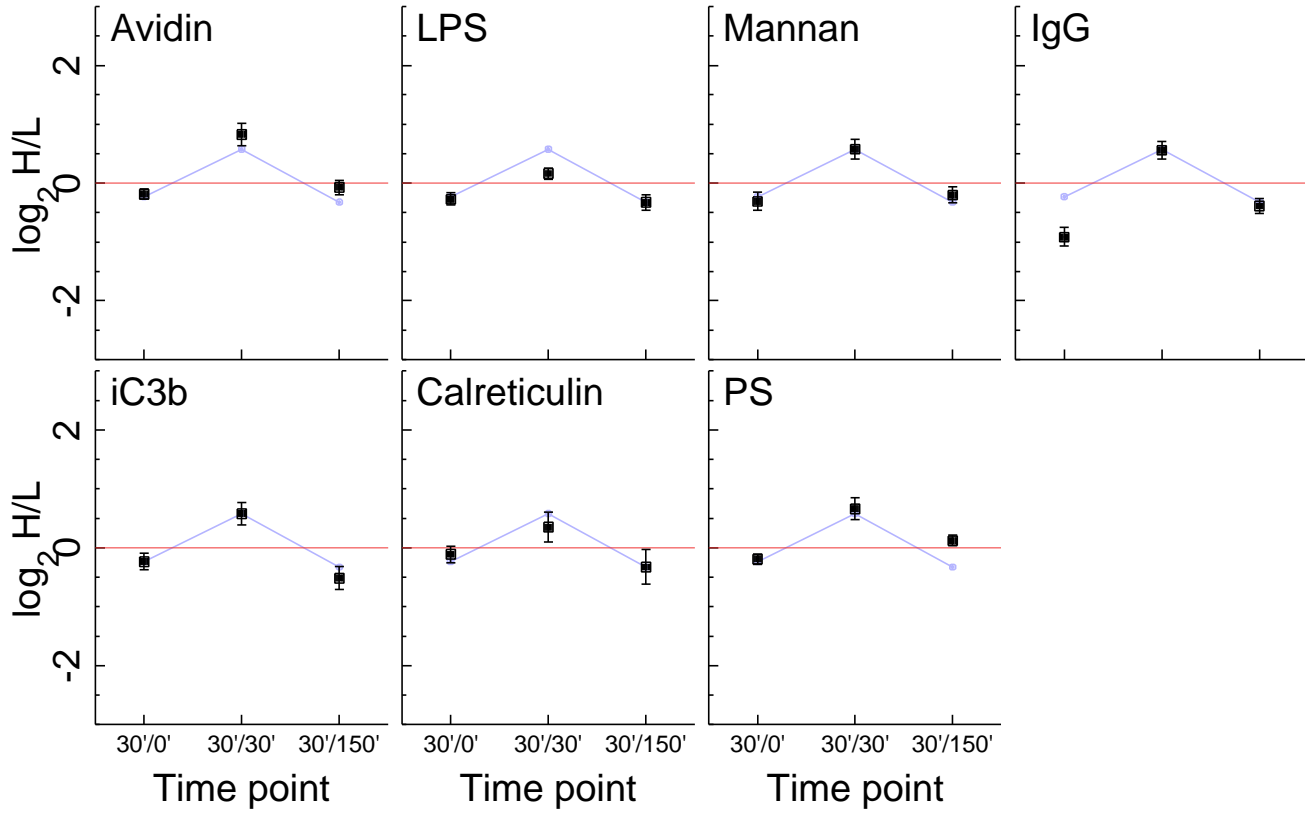

### Igals3bp:2 (Q07797)

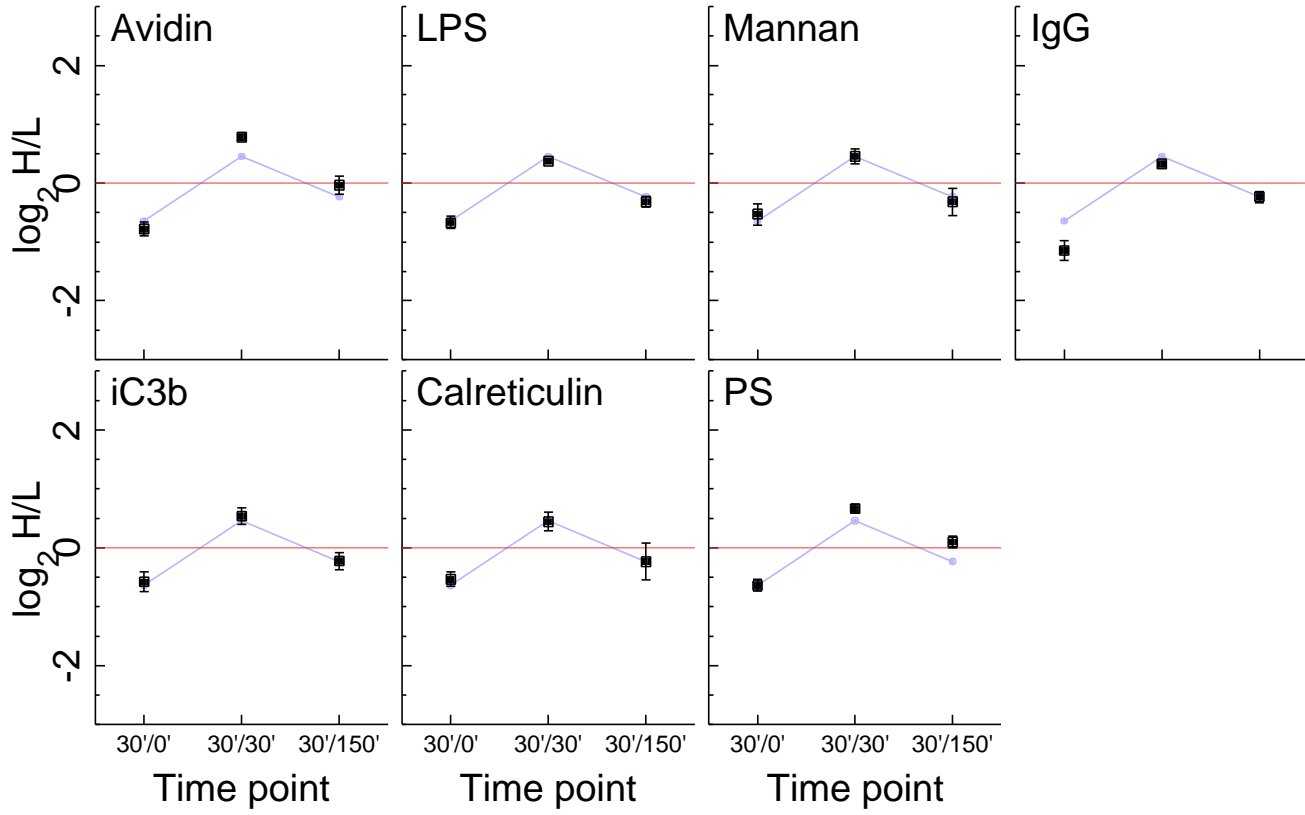

### Igals3 (P16110)

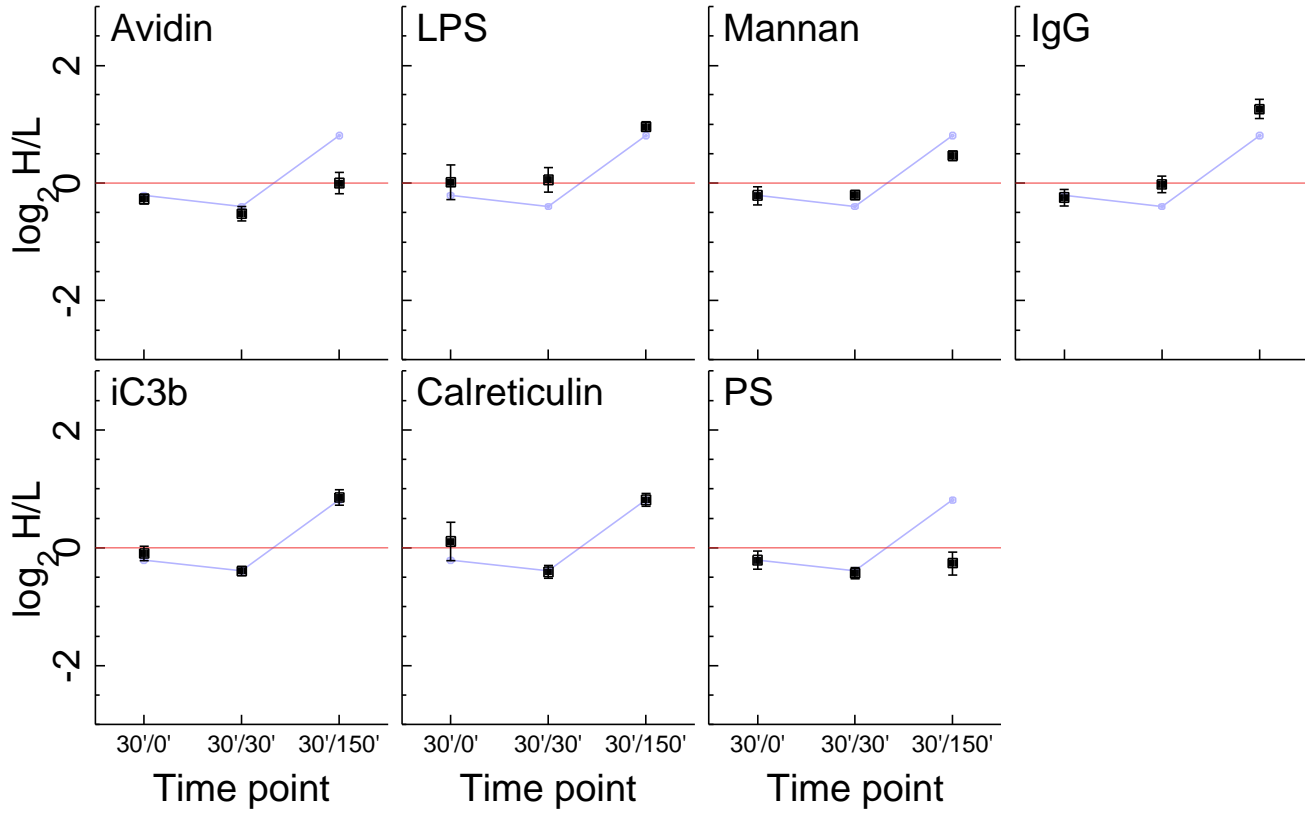

### Igals8 (Q9JL15)

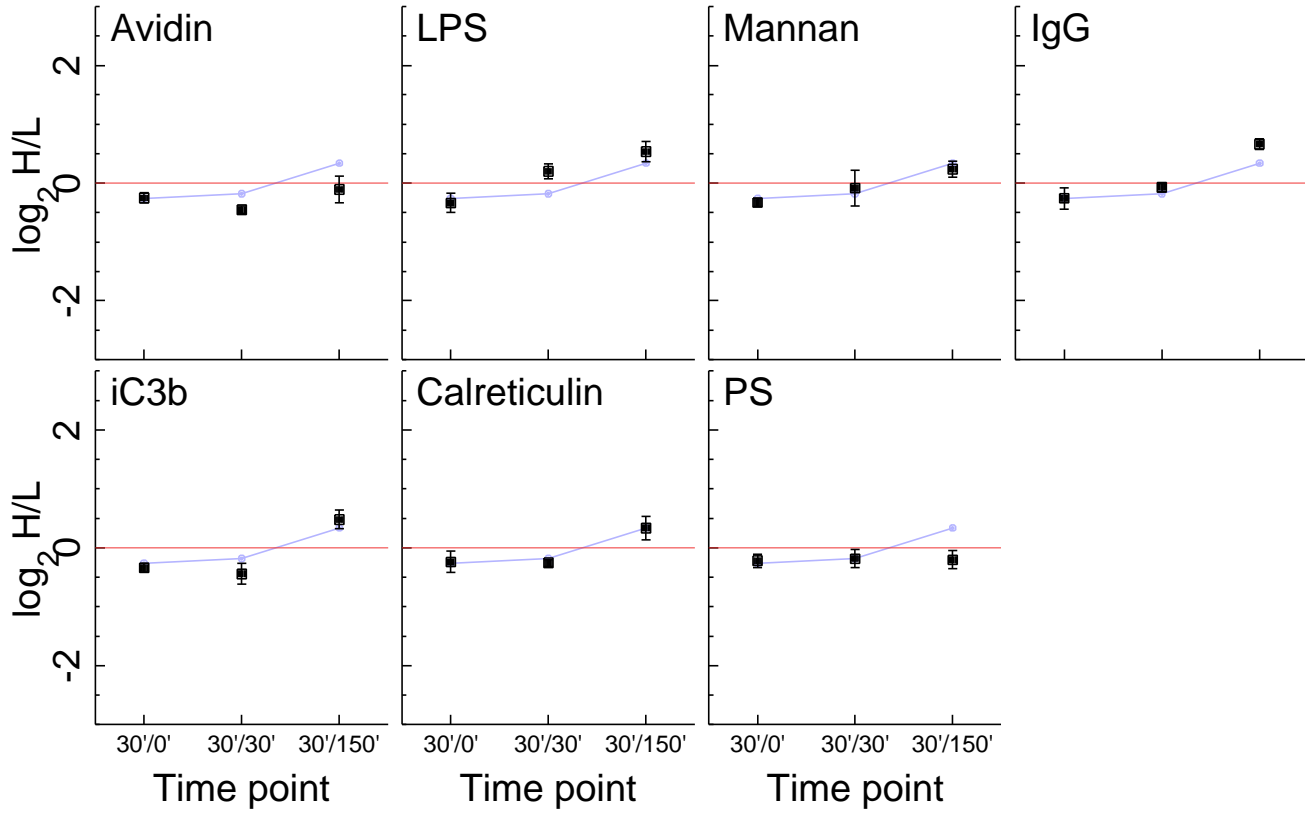

### Igals9 (O08573)

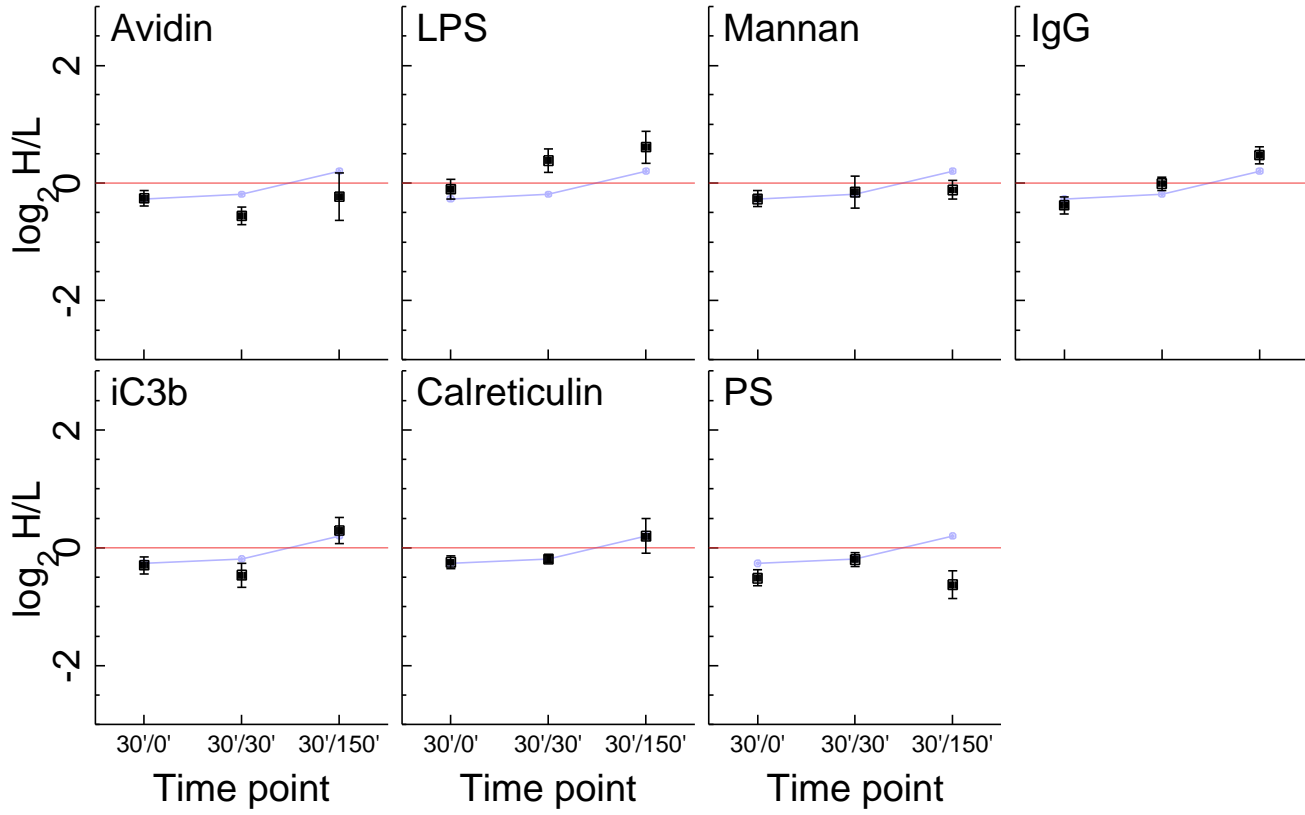



### Igmn (O89017)

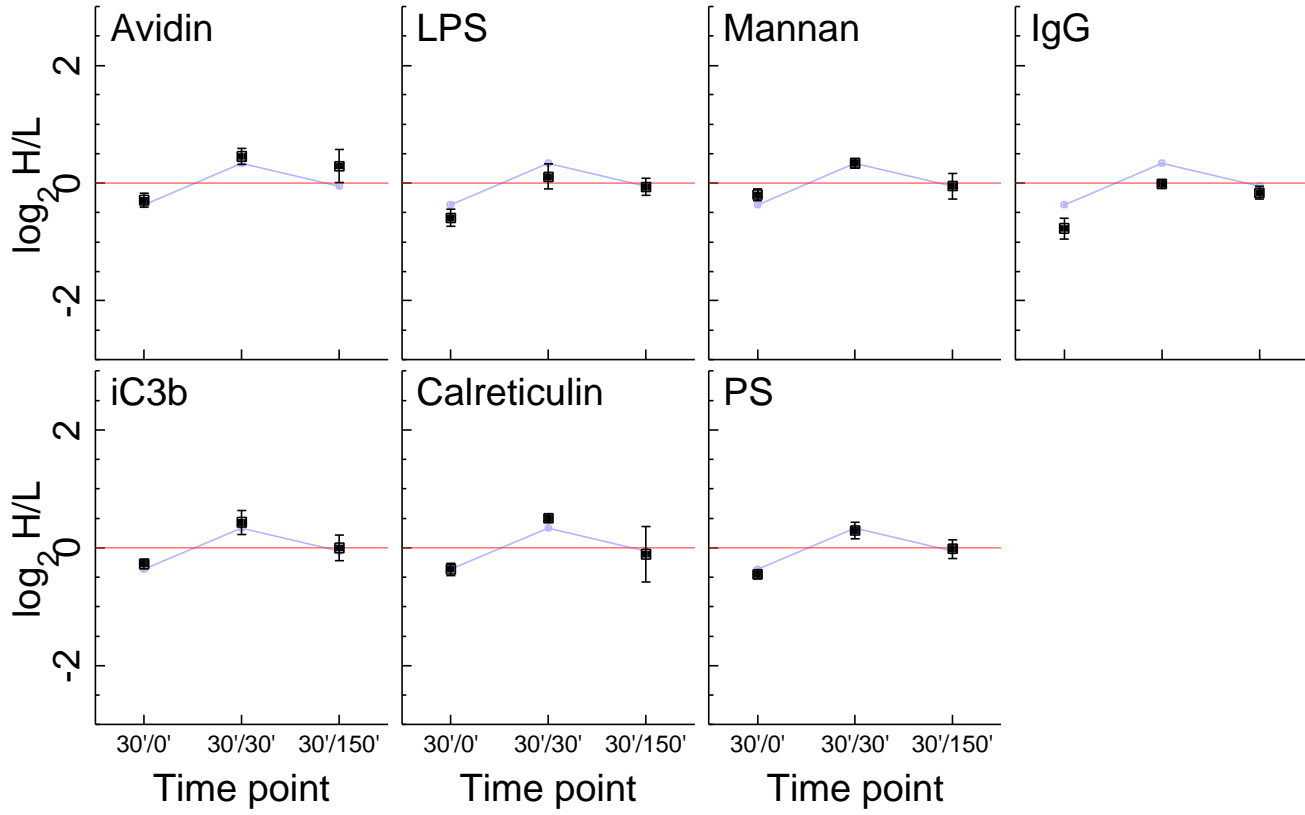

# lig1 (Q3U4X8)

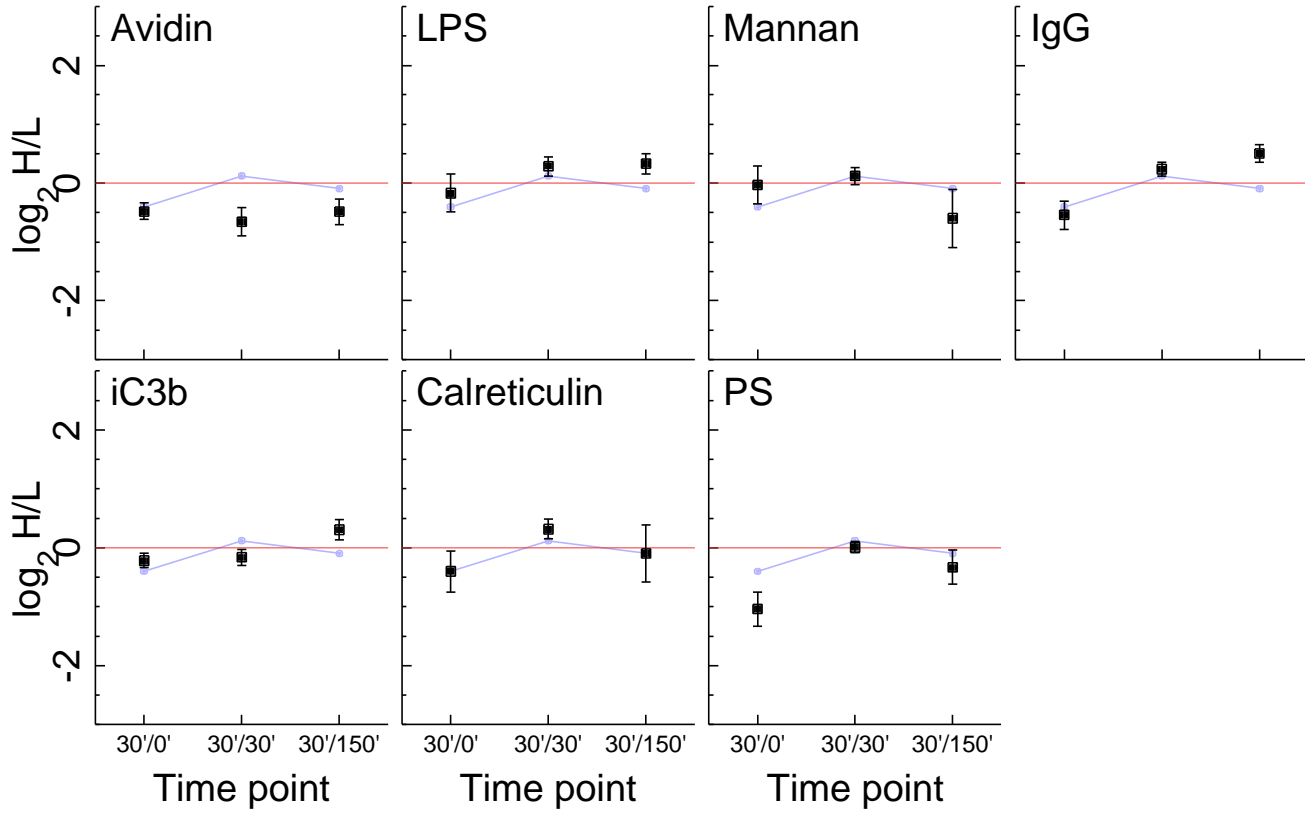

### Il1rb3 (P97484)

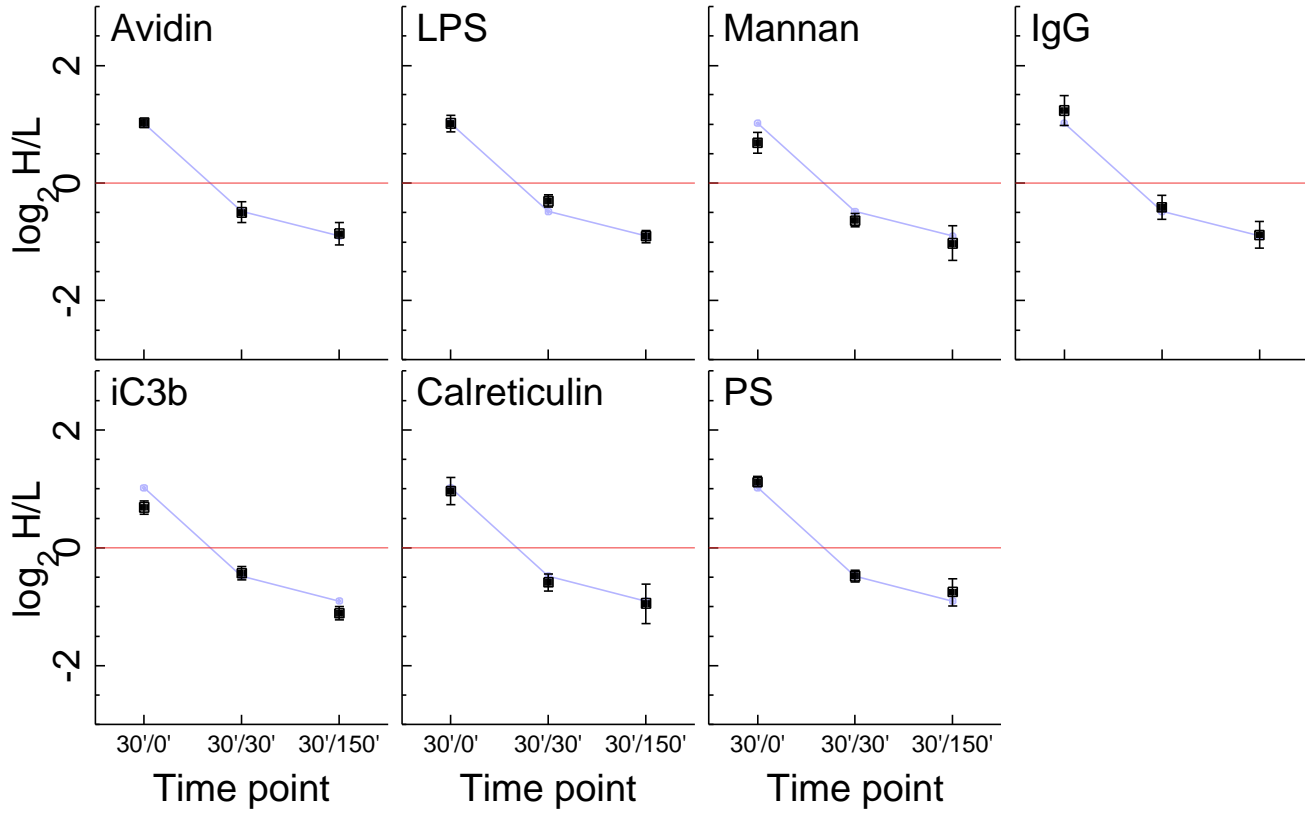

### Il1rb4 (Q64281)

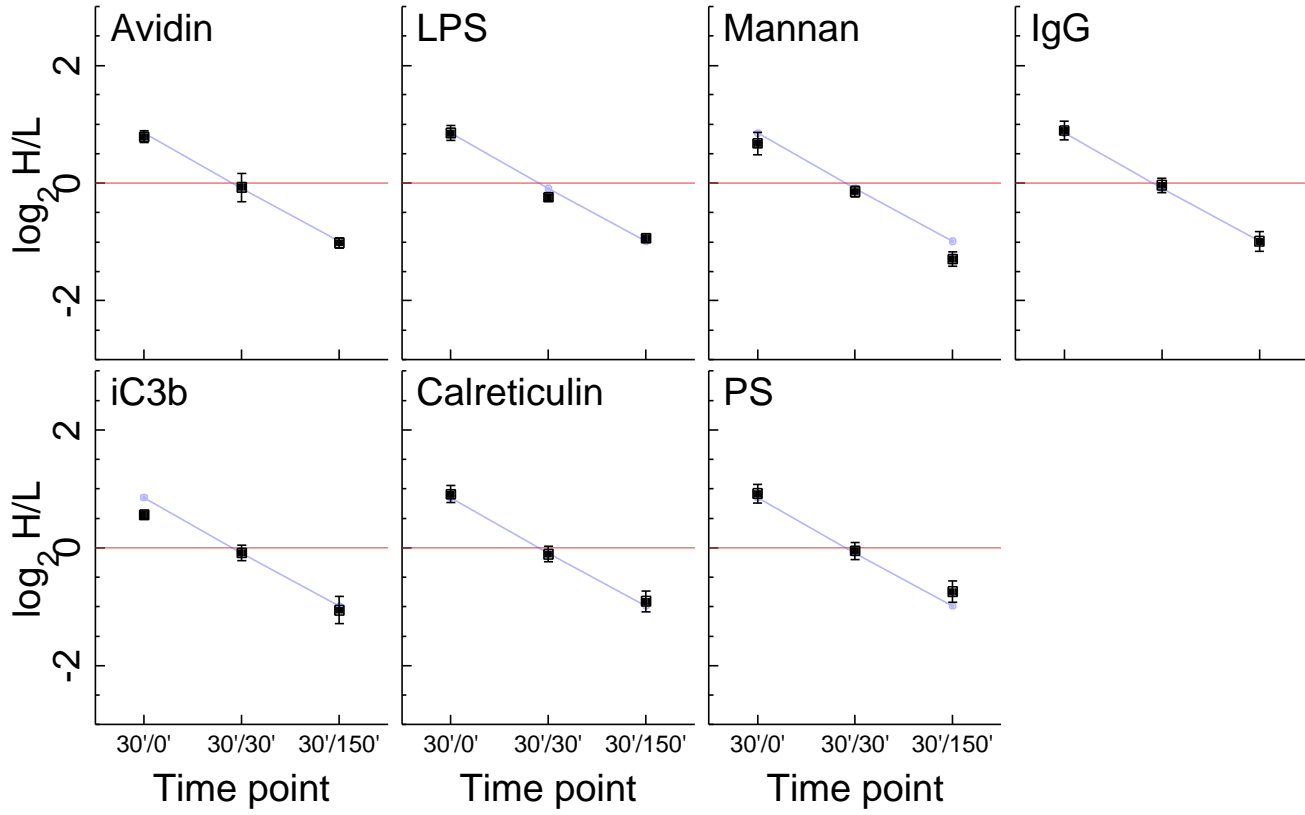

# lima1 (Q9ERG0)

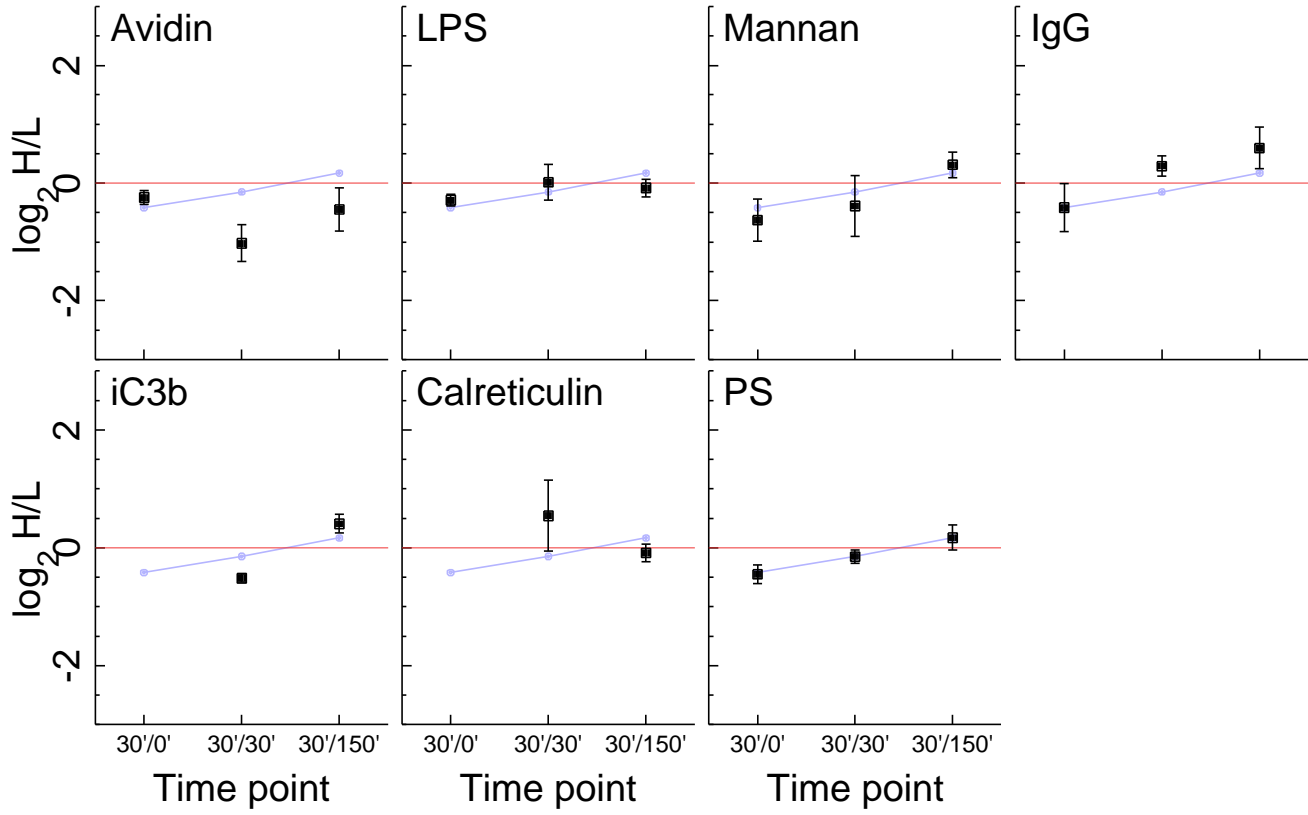

### limd2 (Q8BGB5)

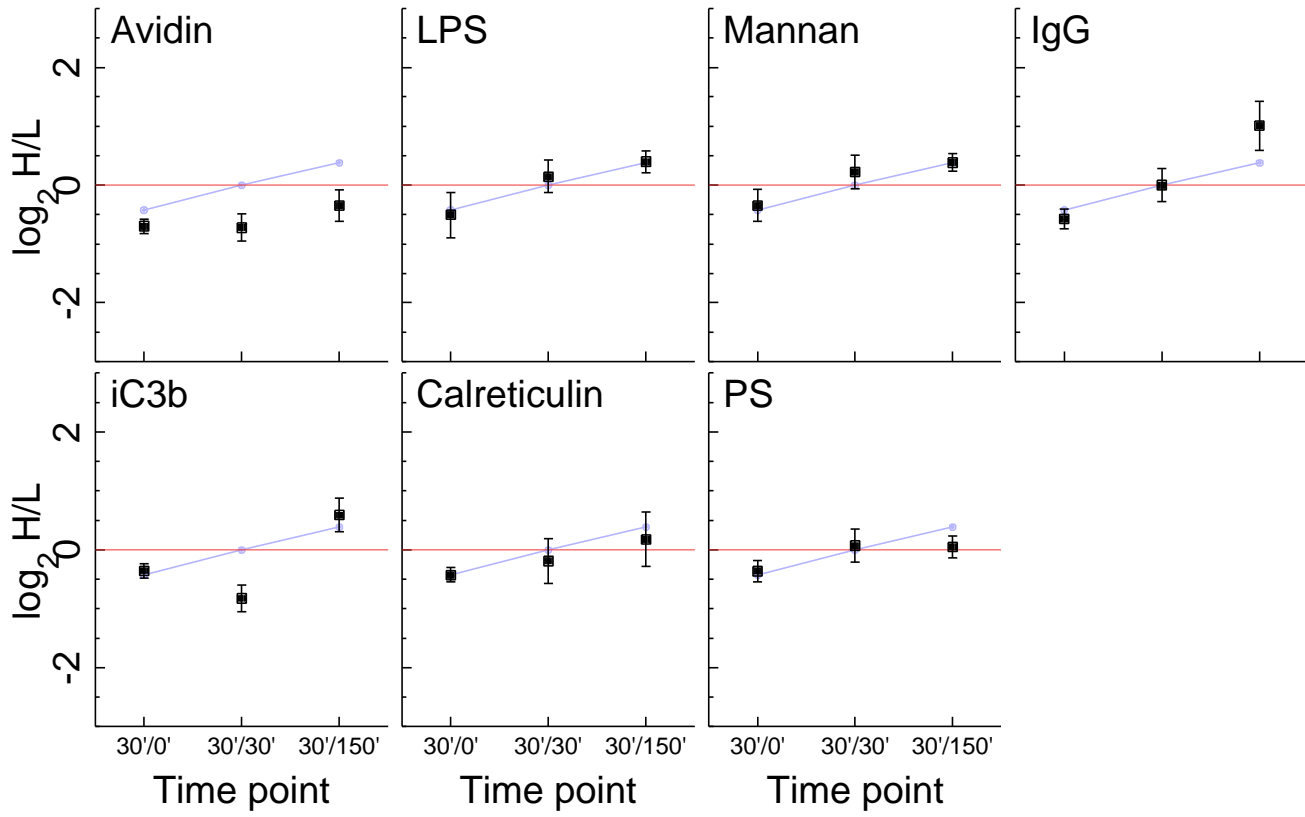

lims1 (E9QP62)

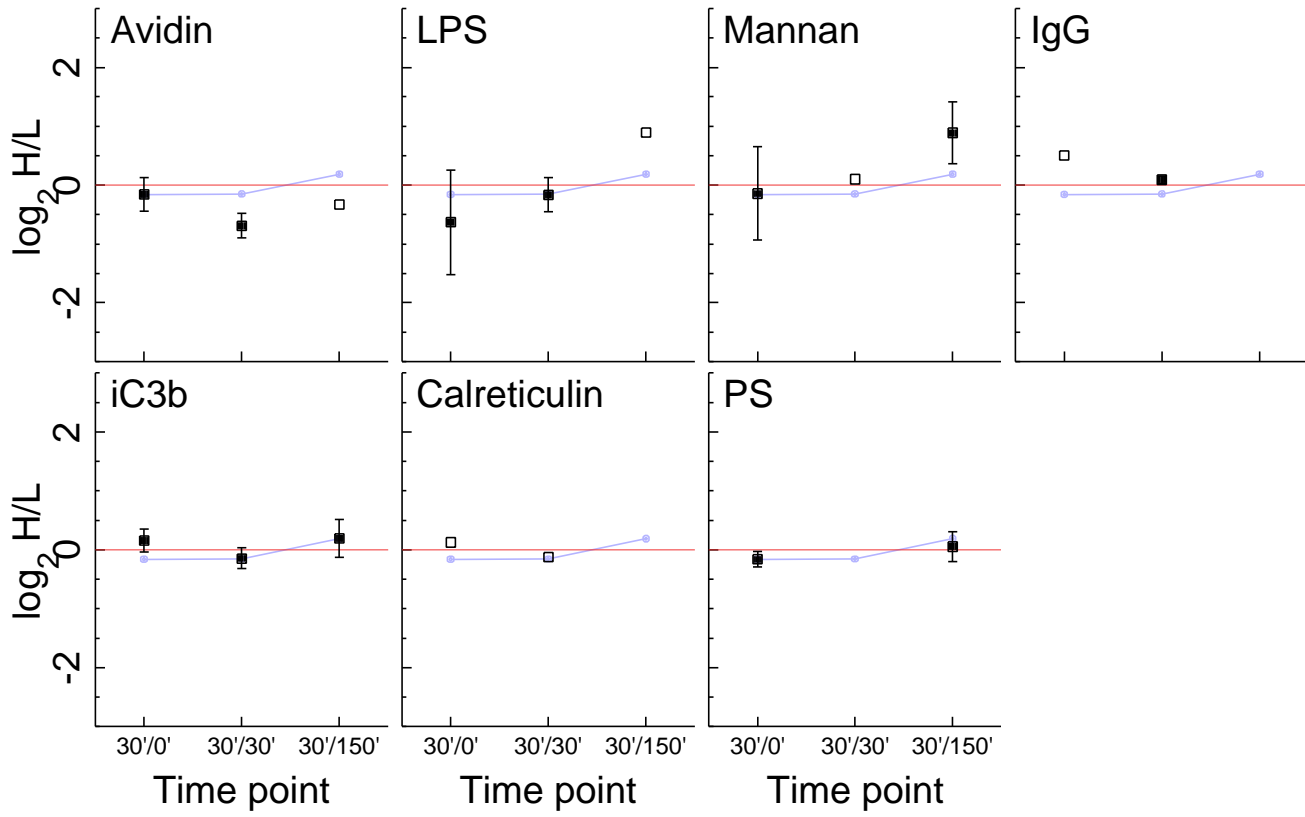

### lin7c (O88952)

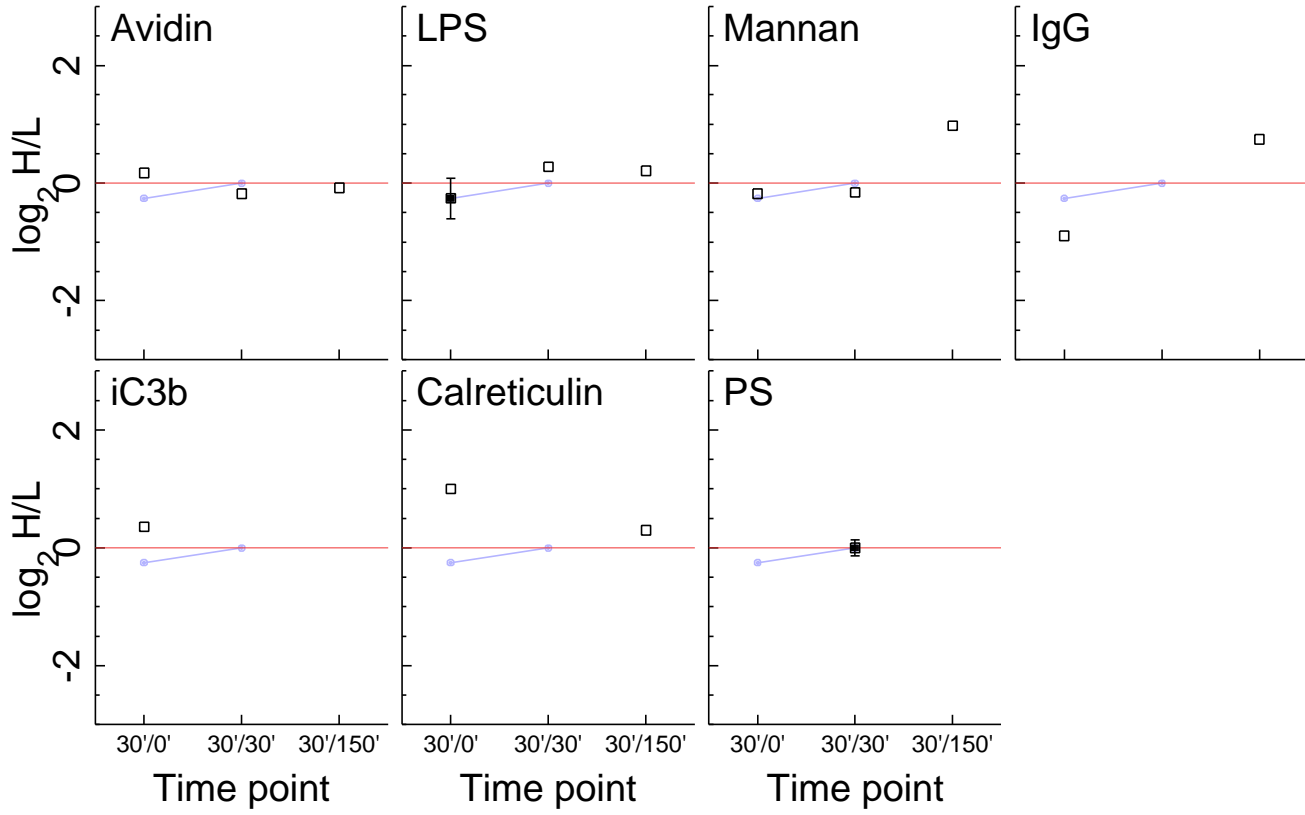



lipa (Q9Z0M5)

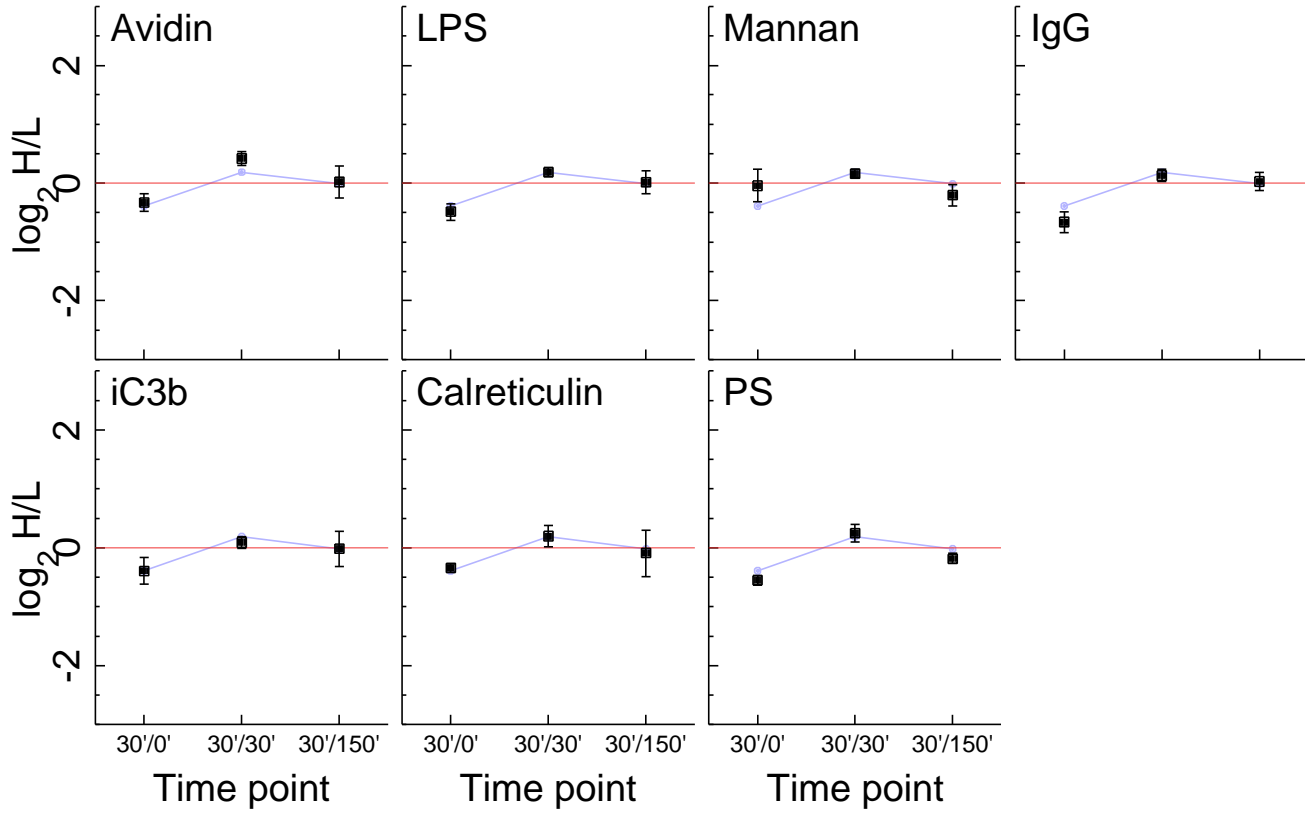

### Iman1 (Q9D0F3)

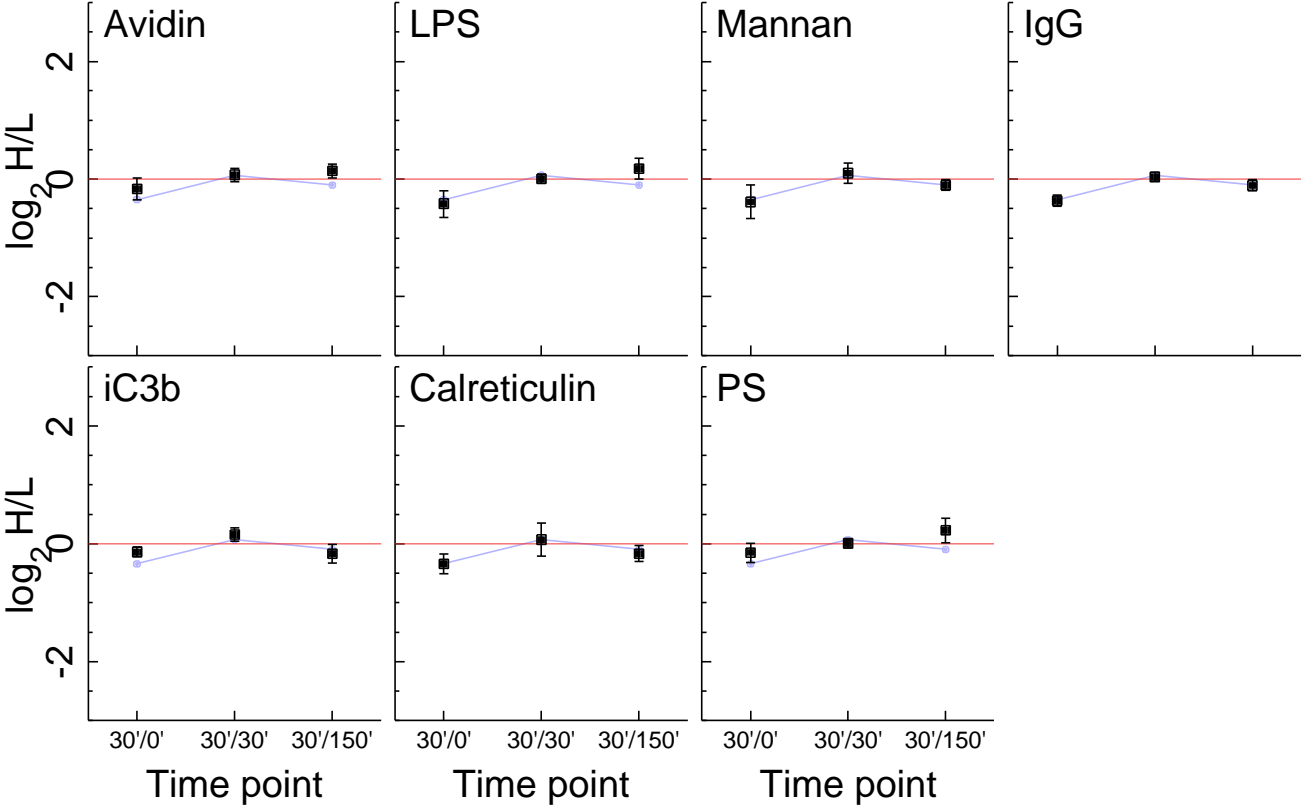

## Iman2 (Q9DBH5)

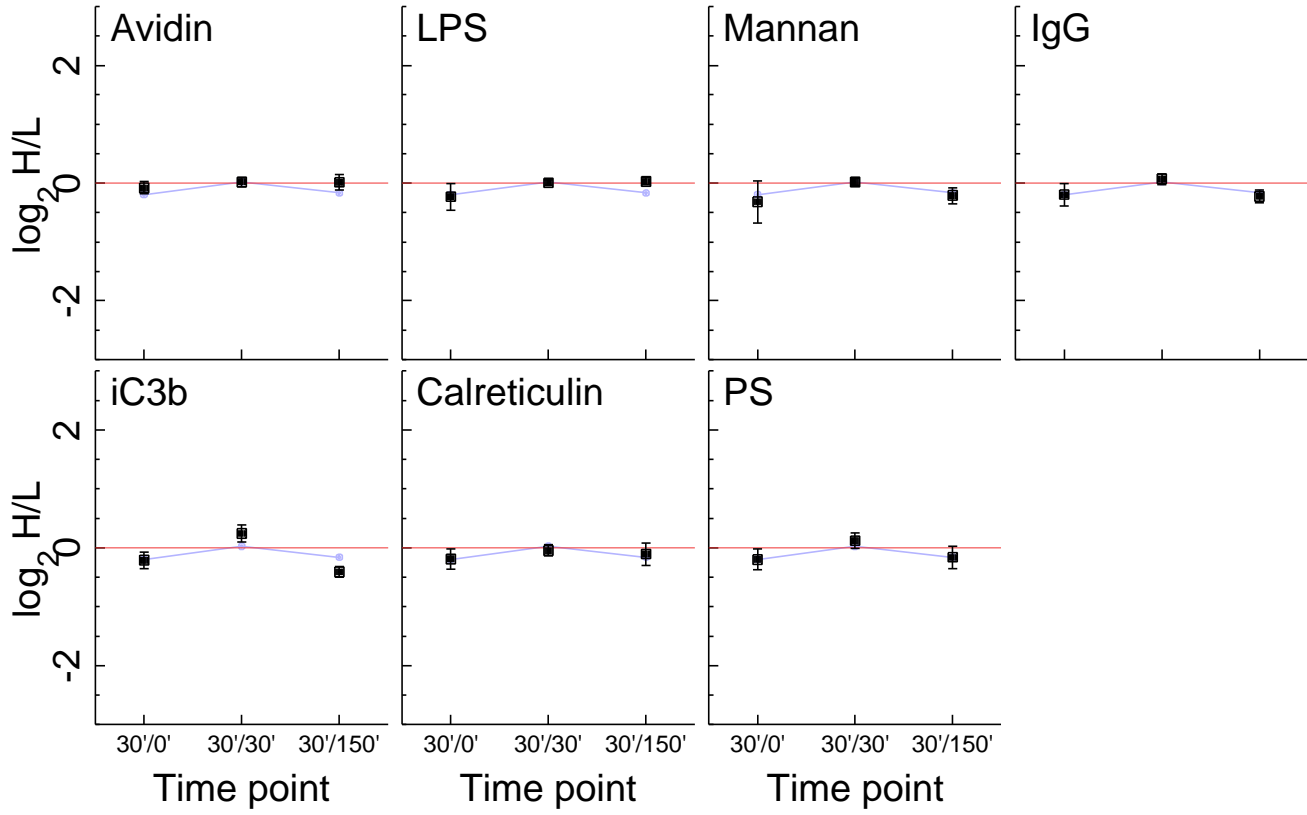

# Imbrd1 (Q8K0B2)

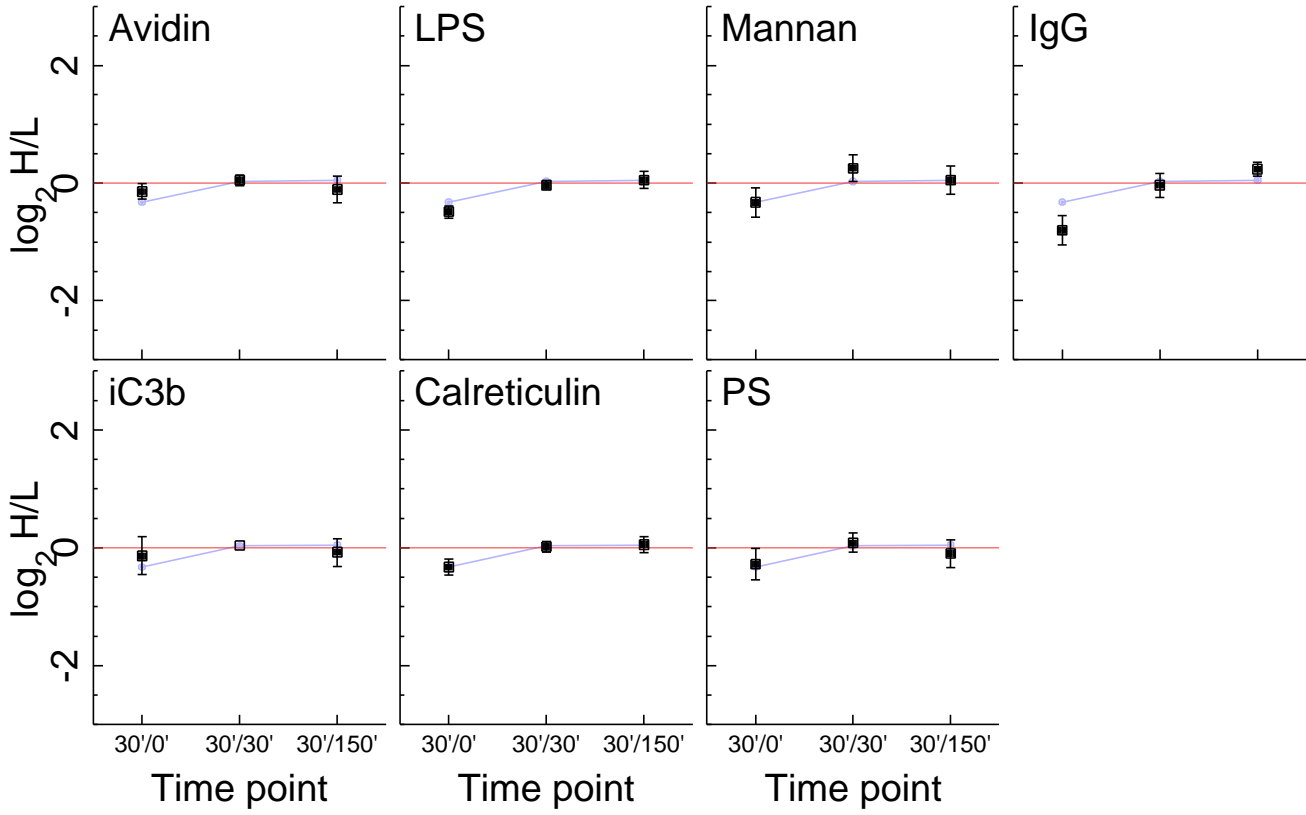

# Imbrd2 (Q8C561)

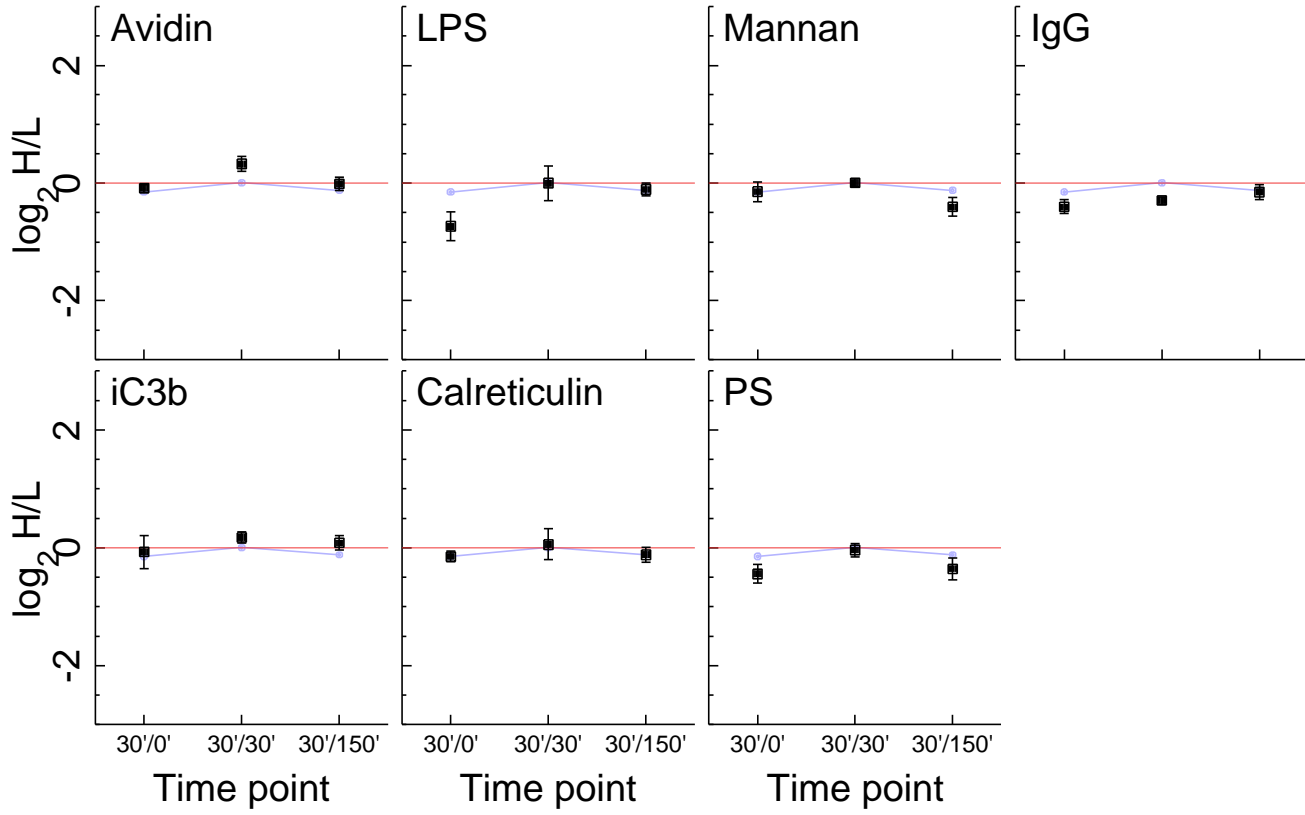

# Imna (P48678)

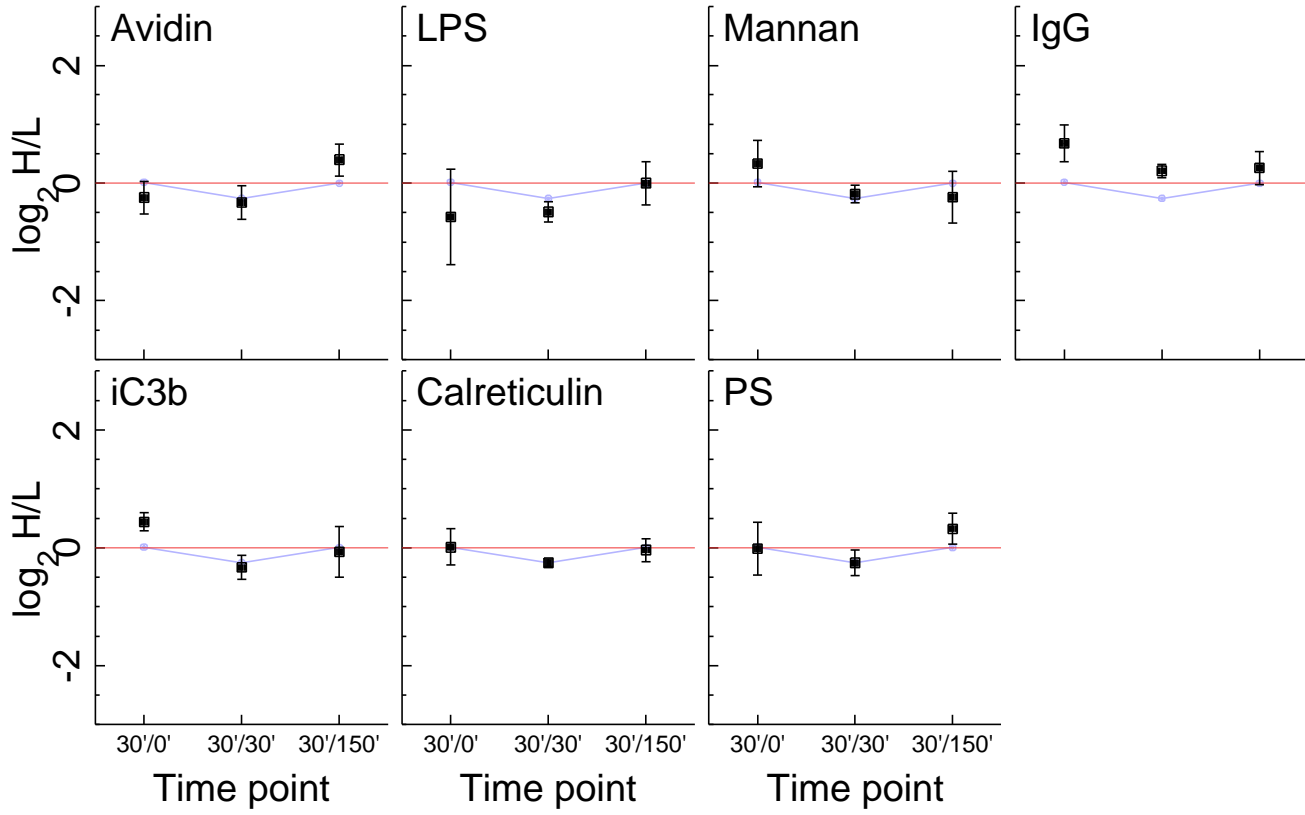

### Imnb1 (P14733)

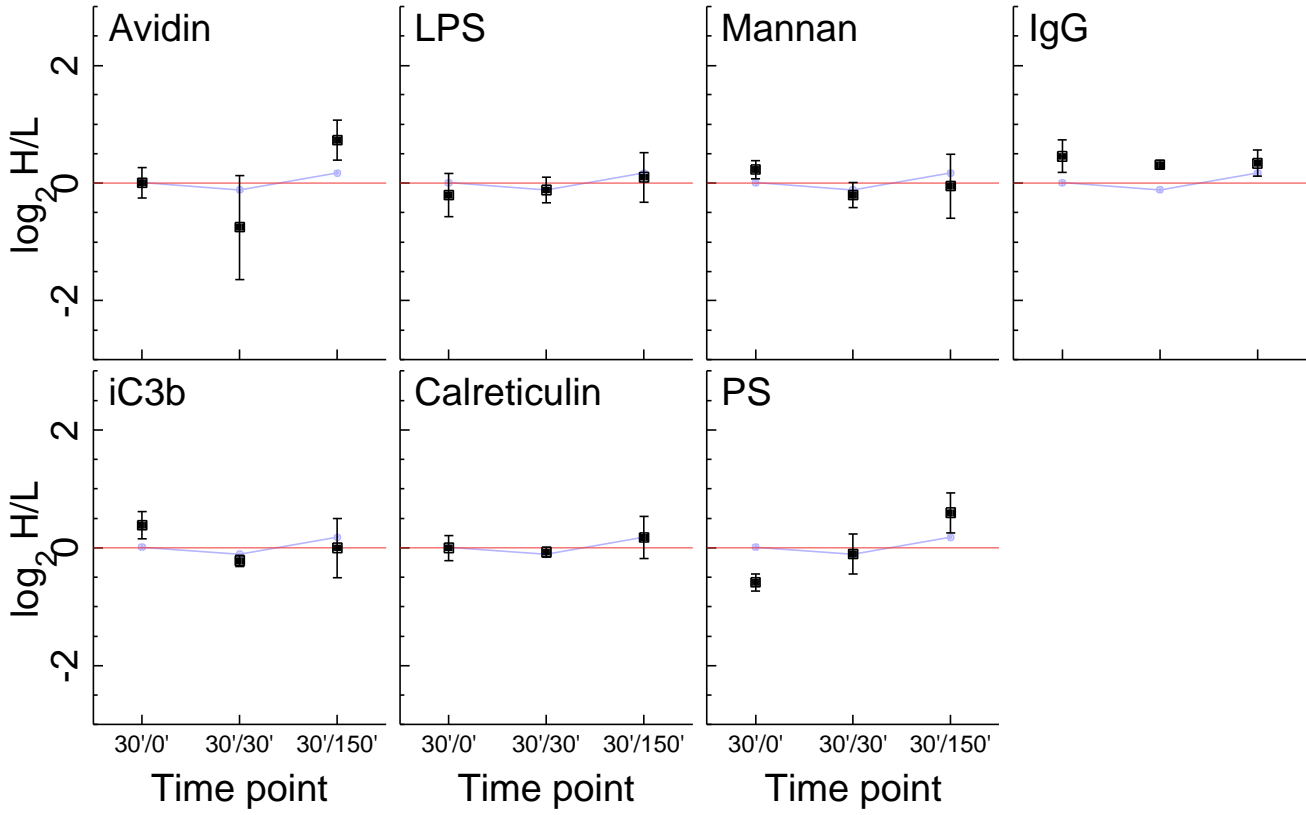

### Imnb2 (P21619)

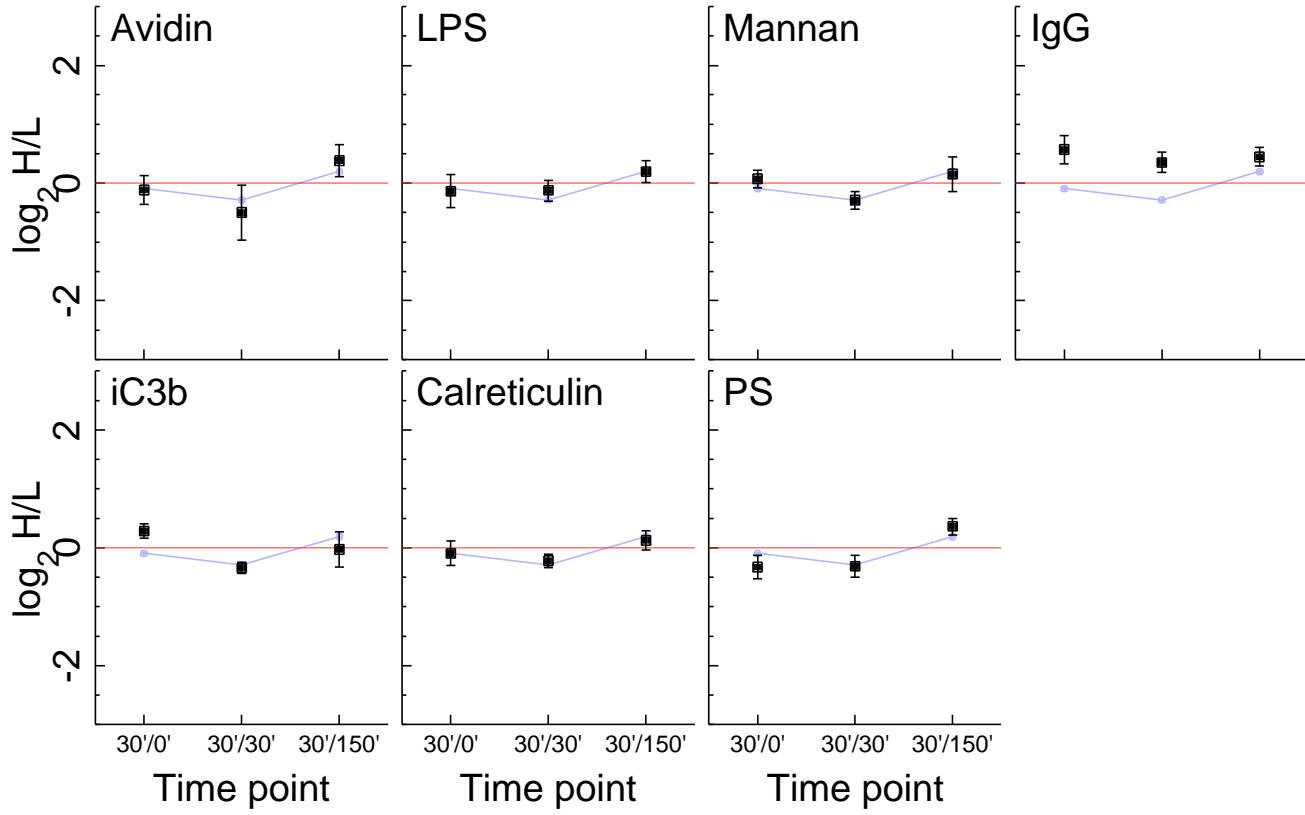



# Inpep (Q8C129)

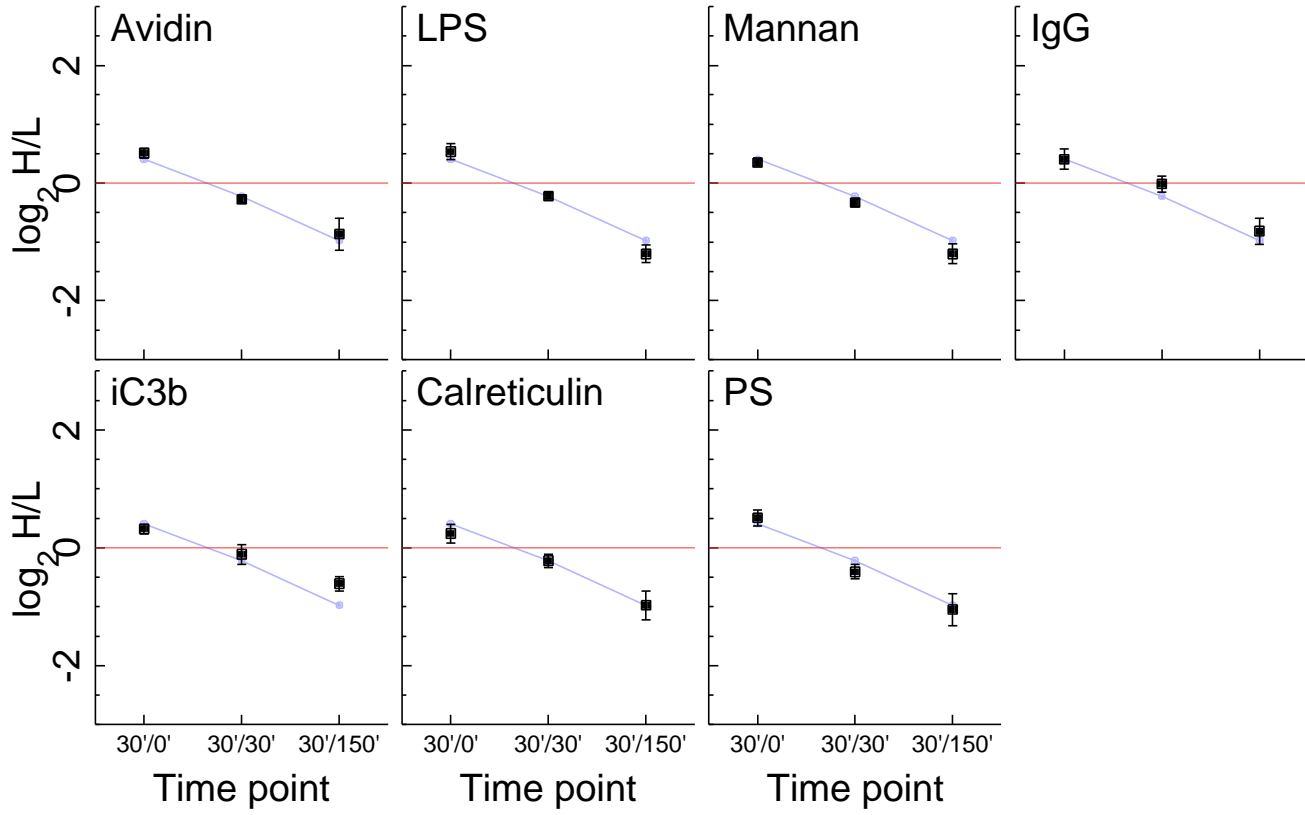

### loh12cr1 (E9Q2W8)

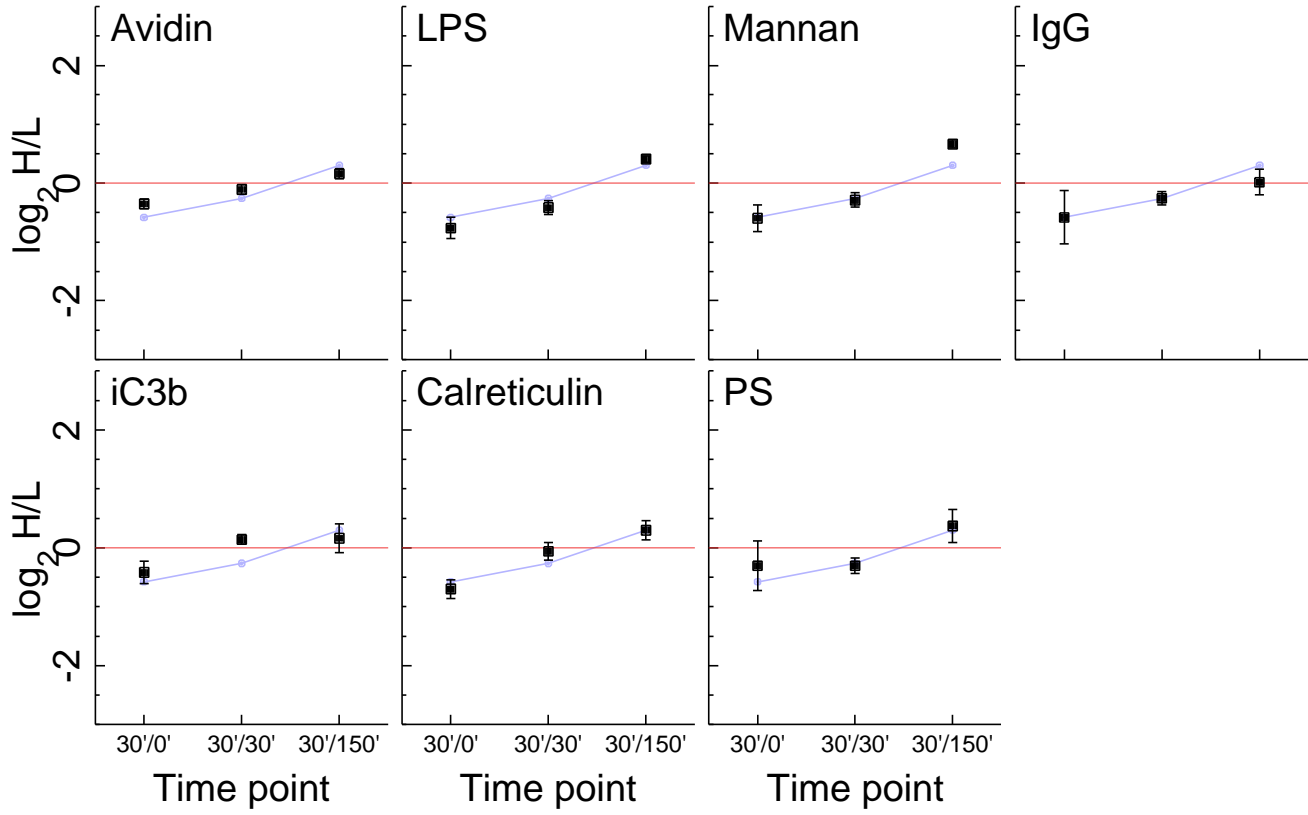

# Ipcat2 (Q8BYI6)

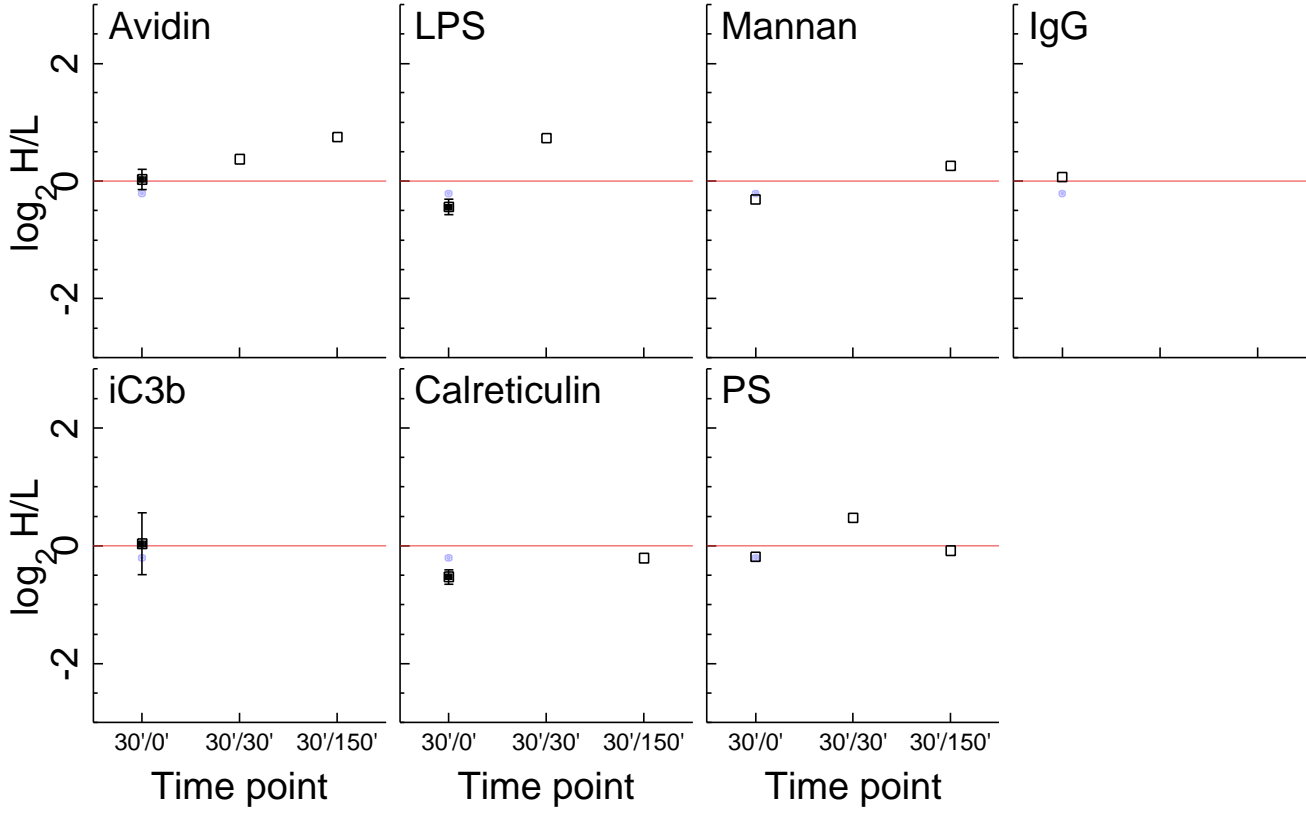

### Ipl (P11152)

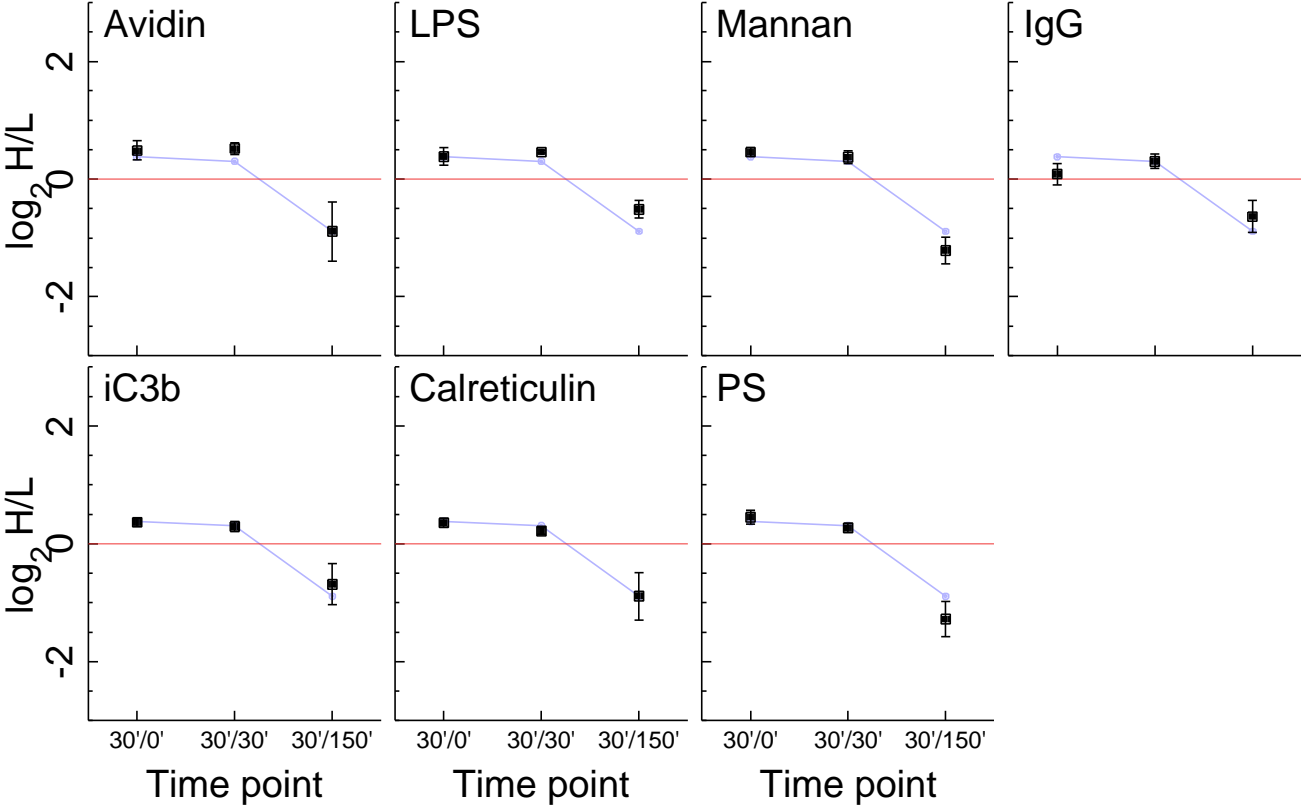

## Irp1b (A2API5)

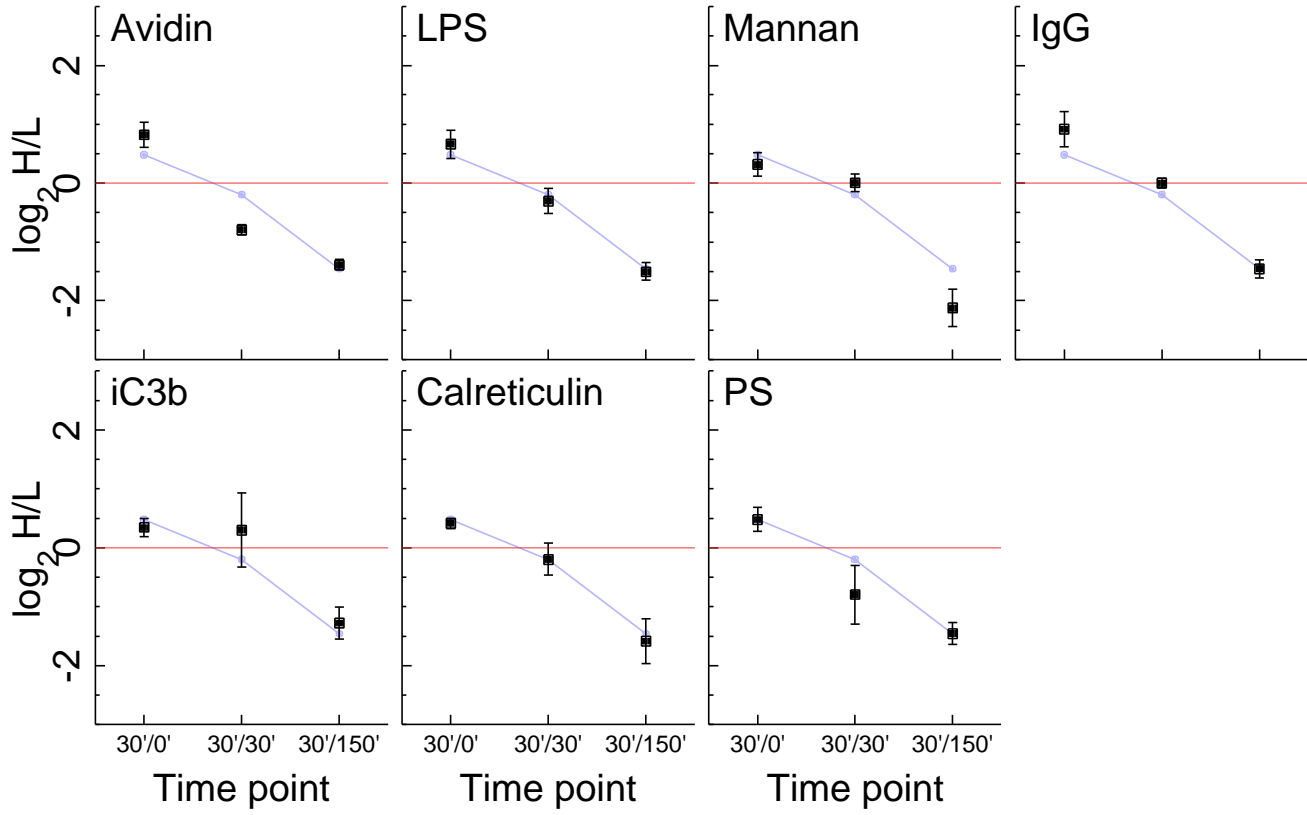

### Irp1 (Q91ZX7)

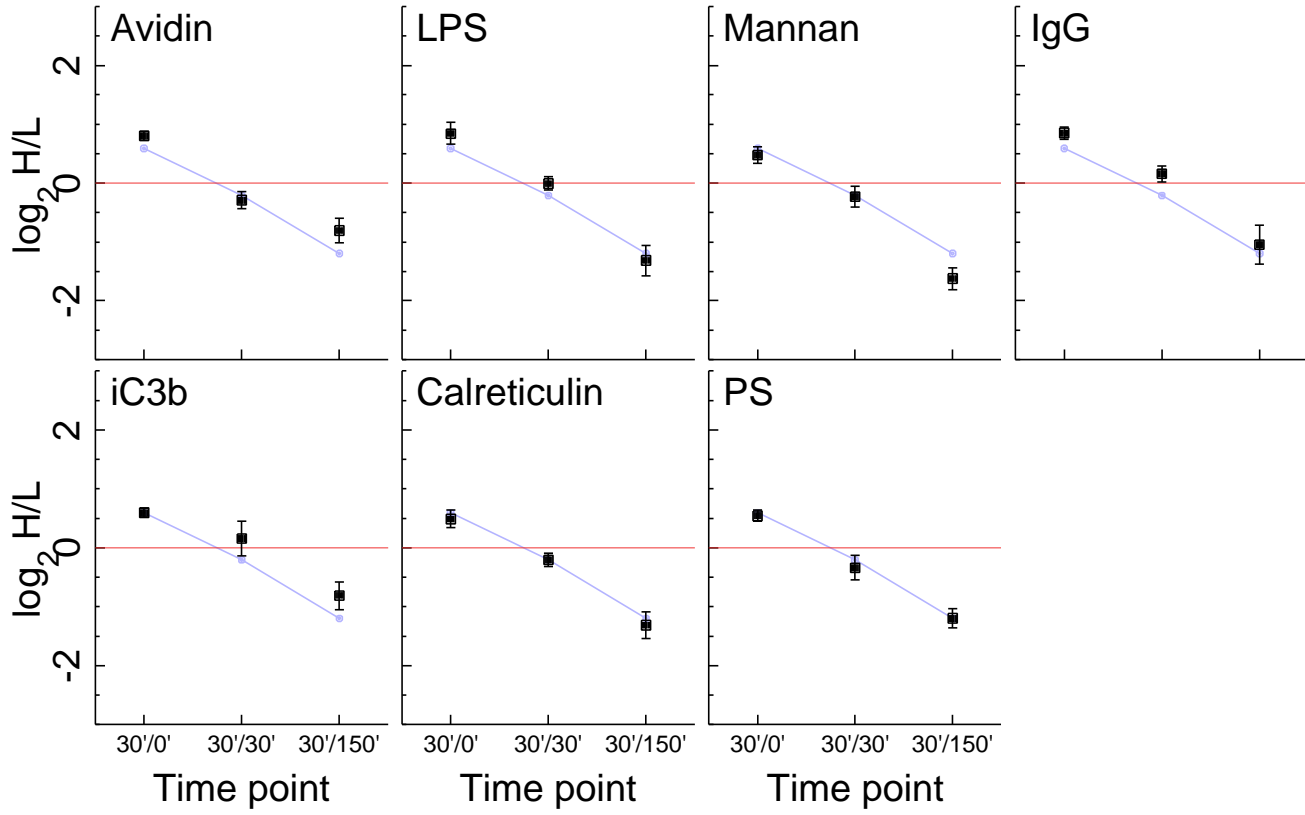

# Irpap1 (P55302)

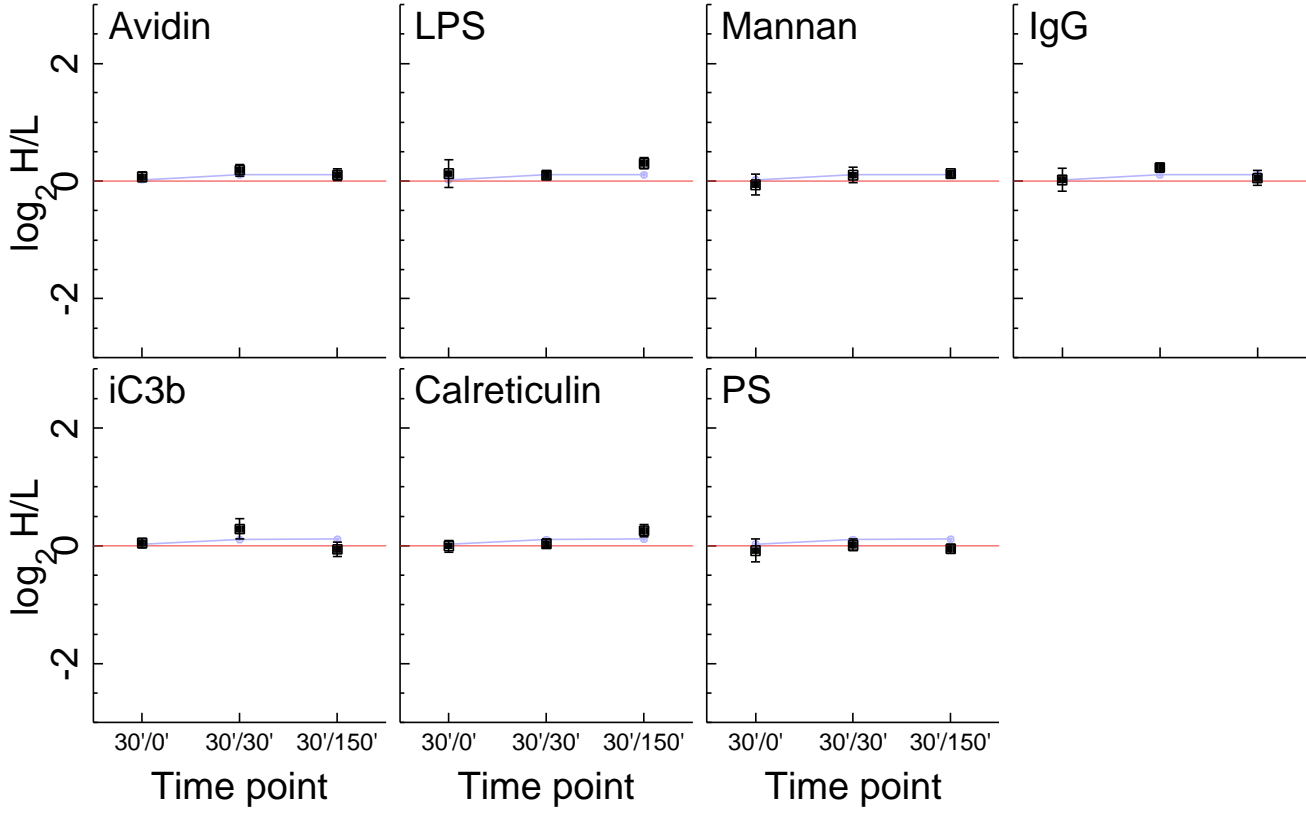

### Irrprc (Q6PB66)

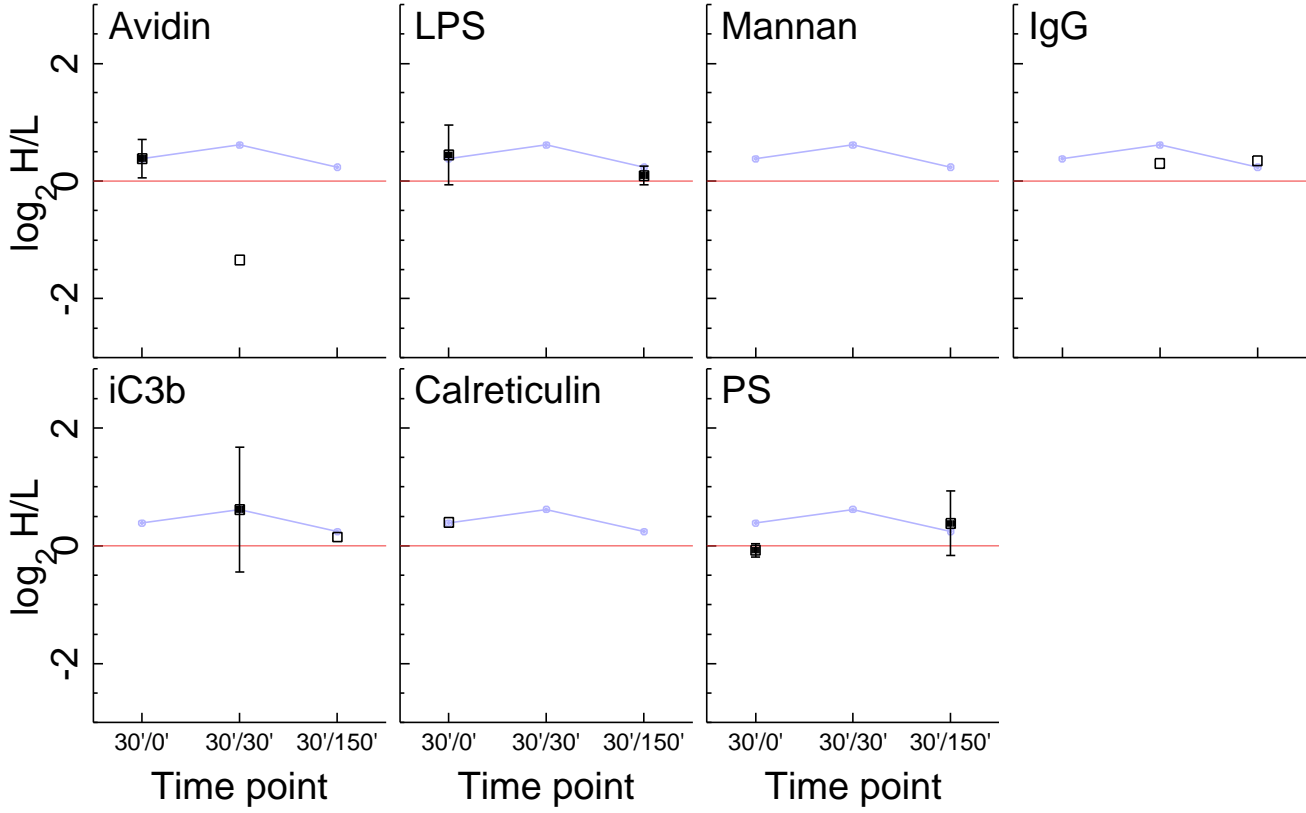



### Irrc25 (Q8K1T1)

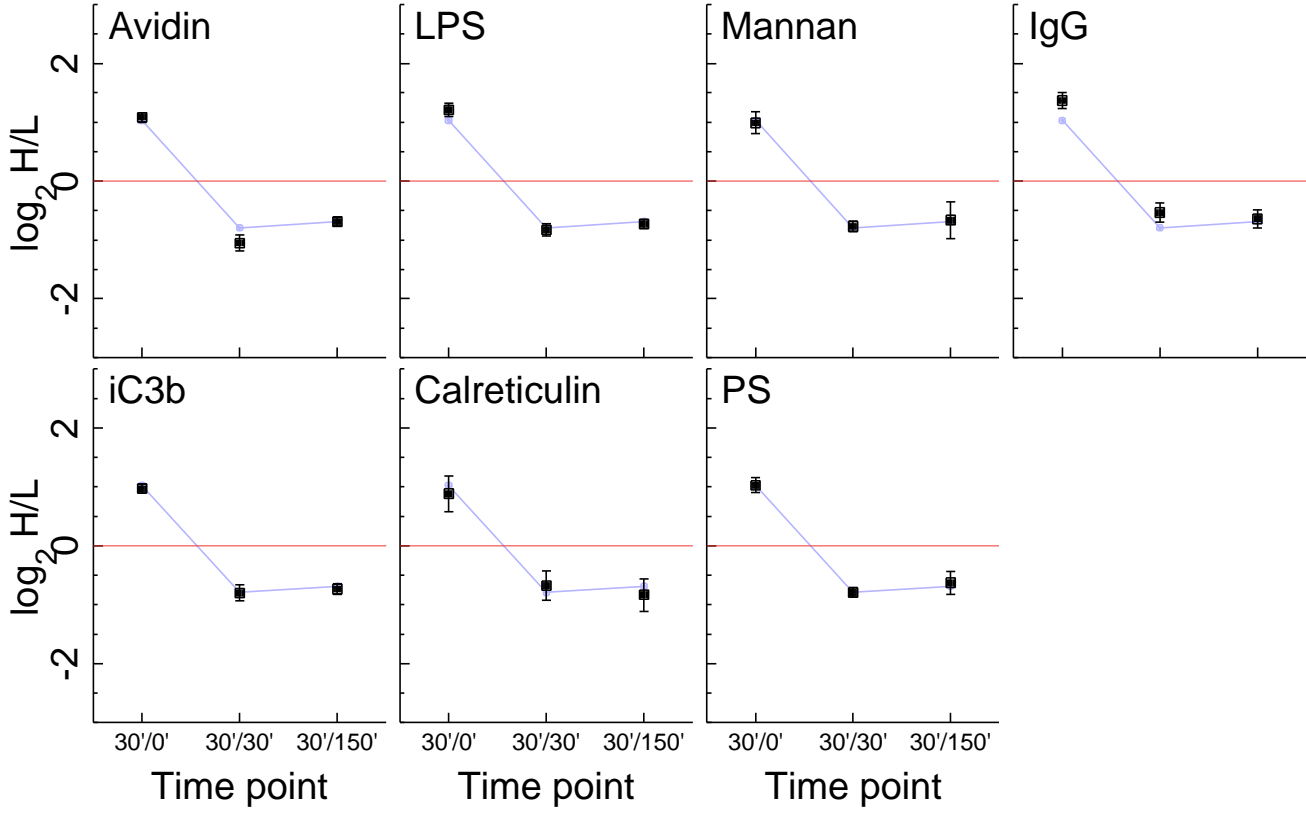

### Irrc57 (Q8JZX5)

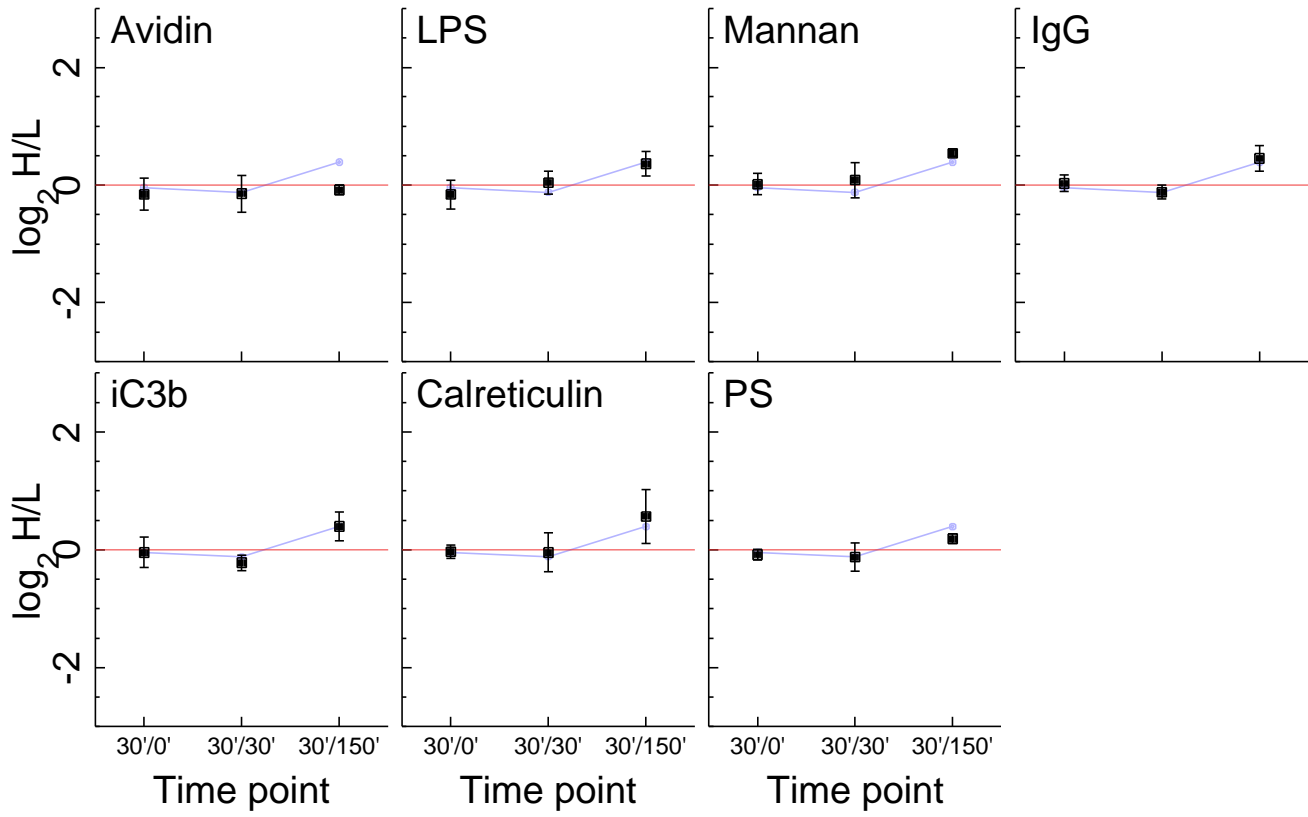

### Irrc59 (Q922Q8)

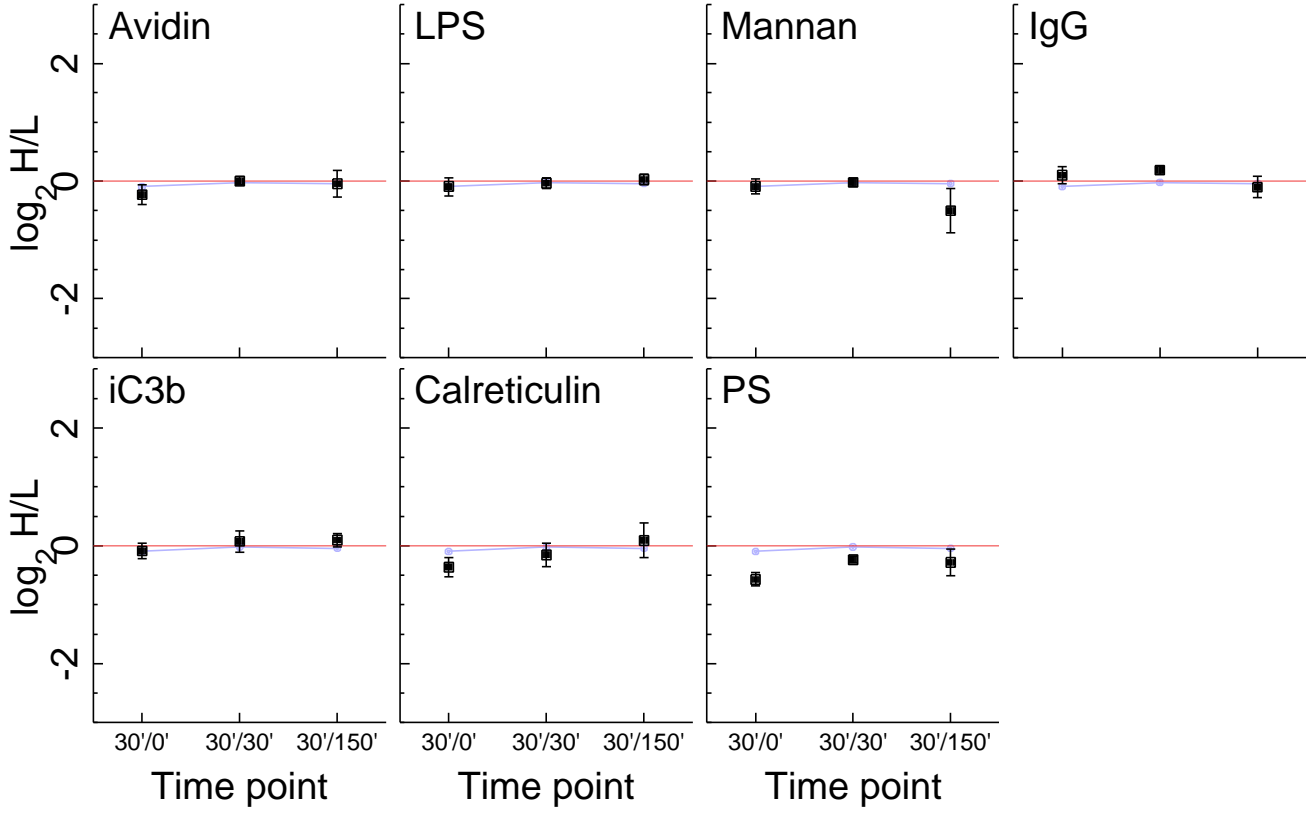

### Irrc8c (Q8R502)

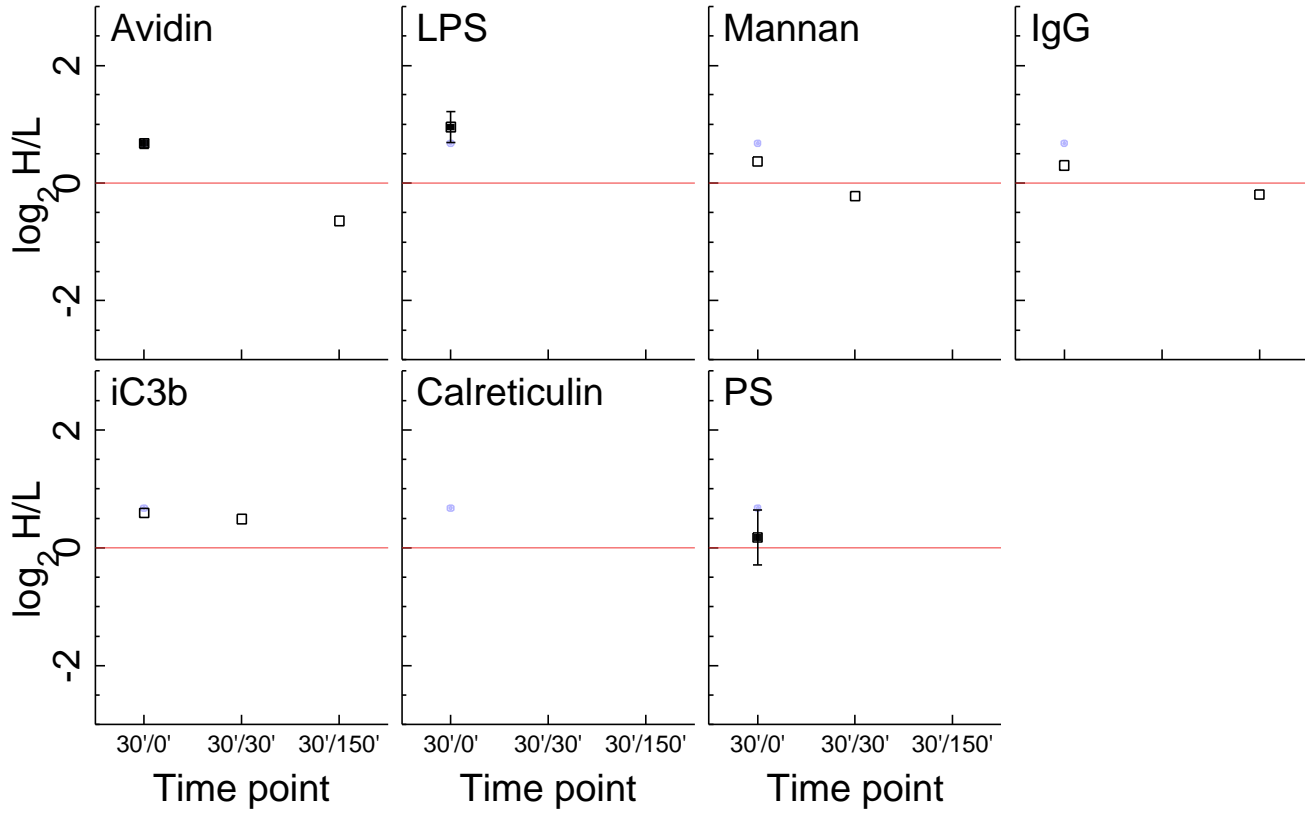

### Isp1 (P19973)

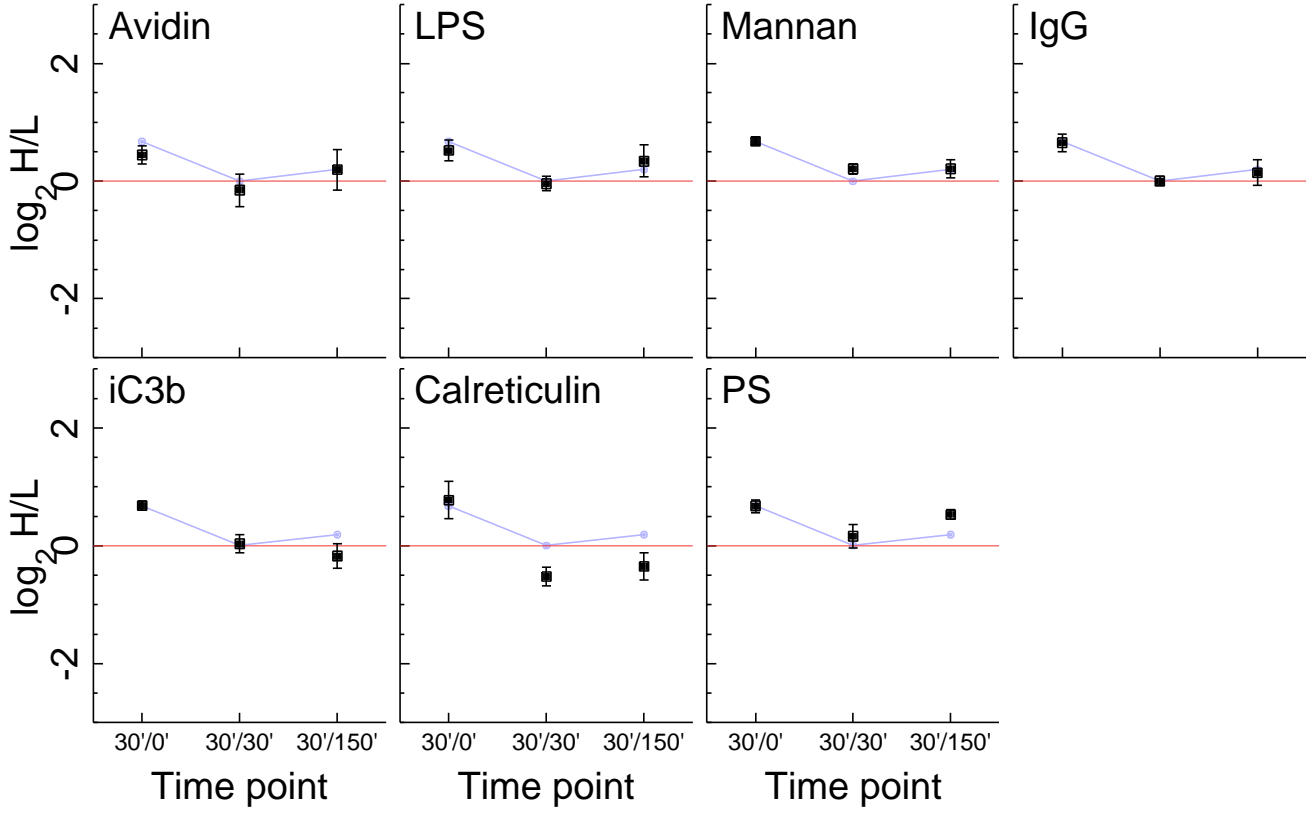

### Iss (Q8BLN5)

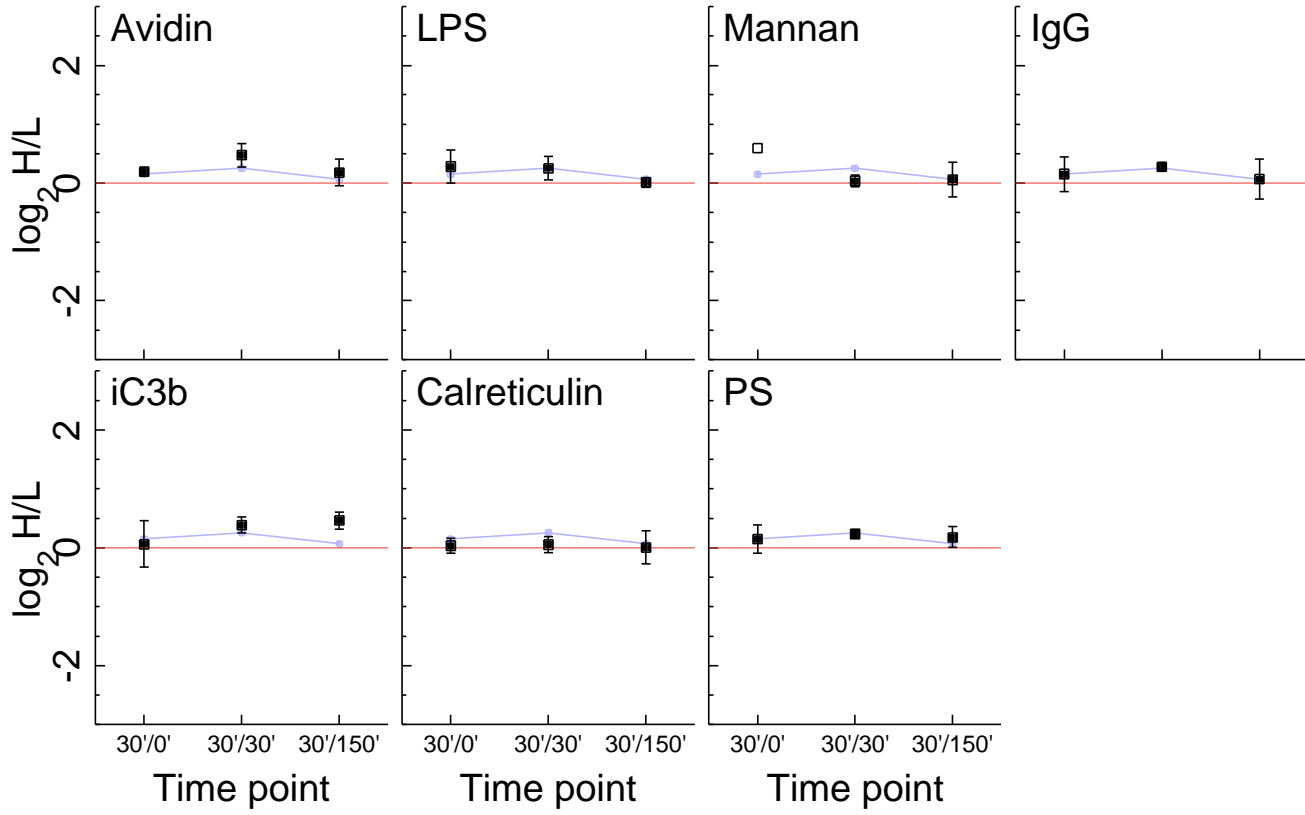

### ly6a (P05533)

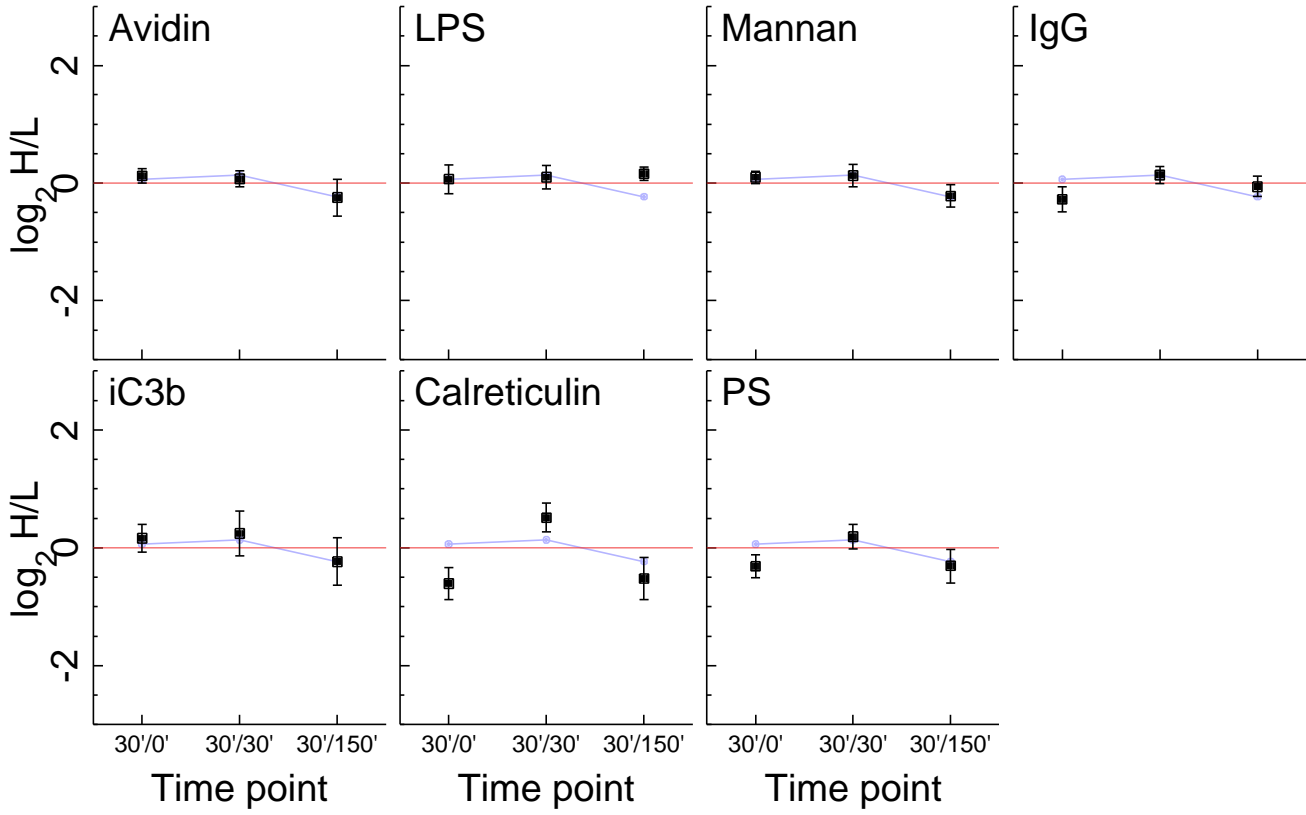

### Iy6e (Q99JA5)

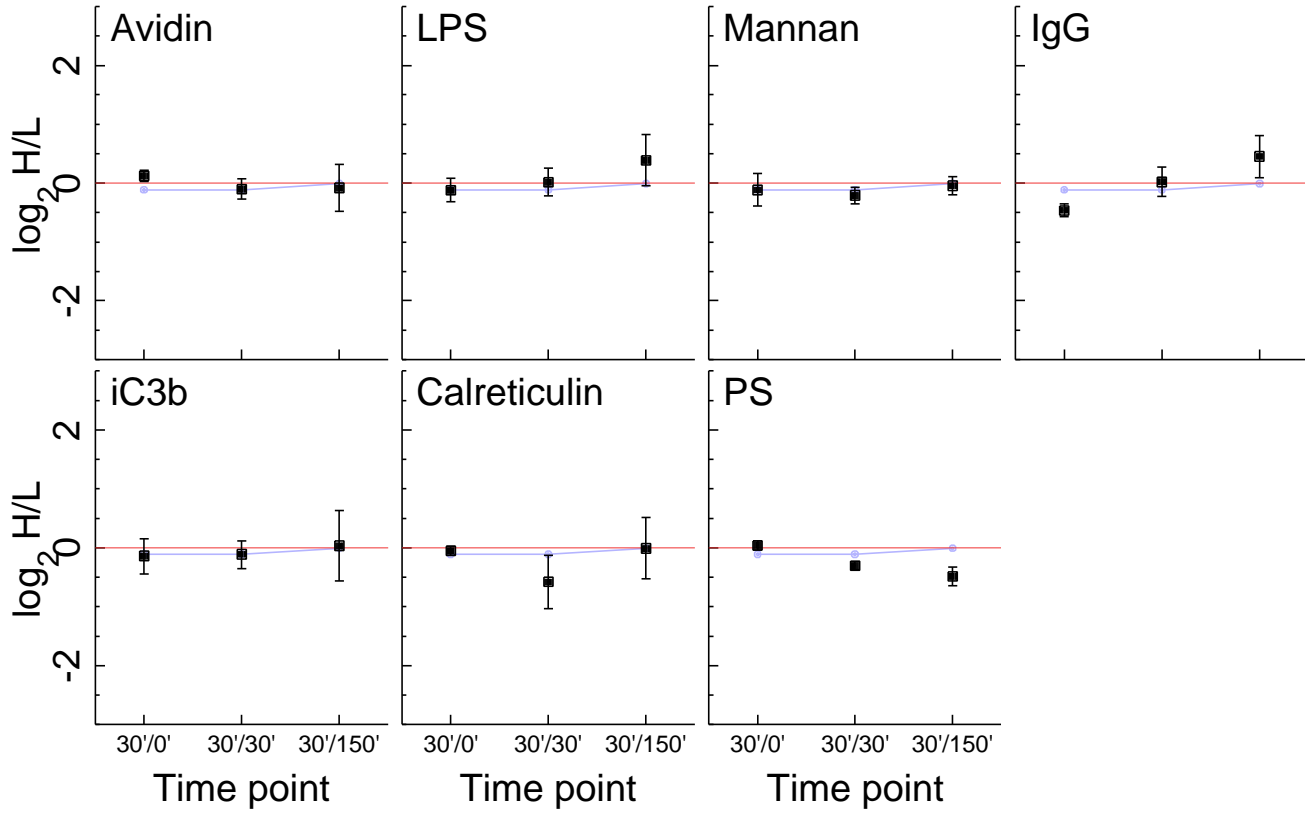



# Iy86 (O88188)

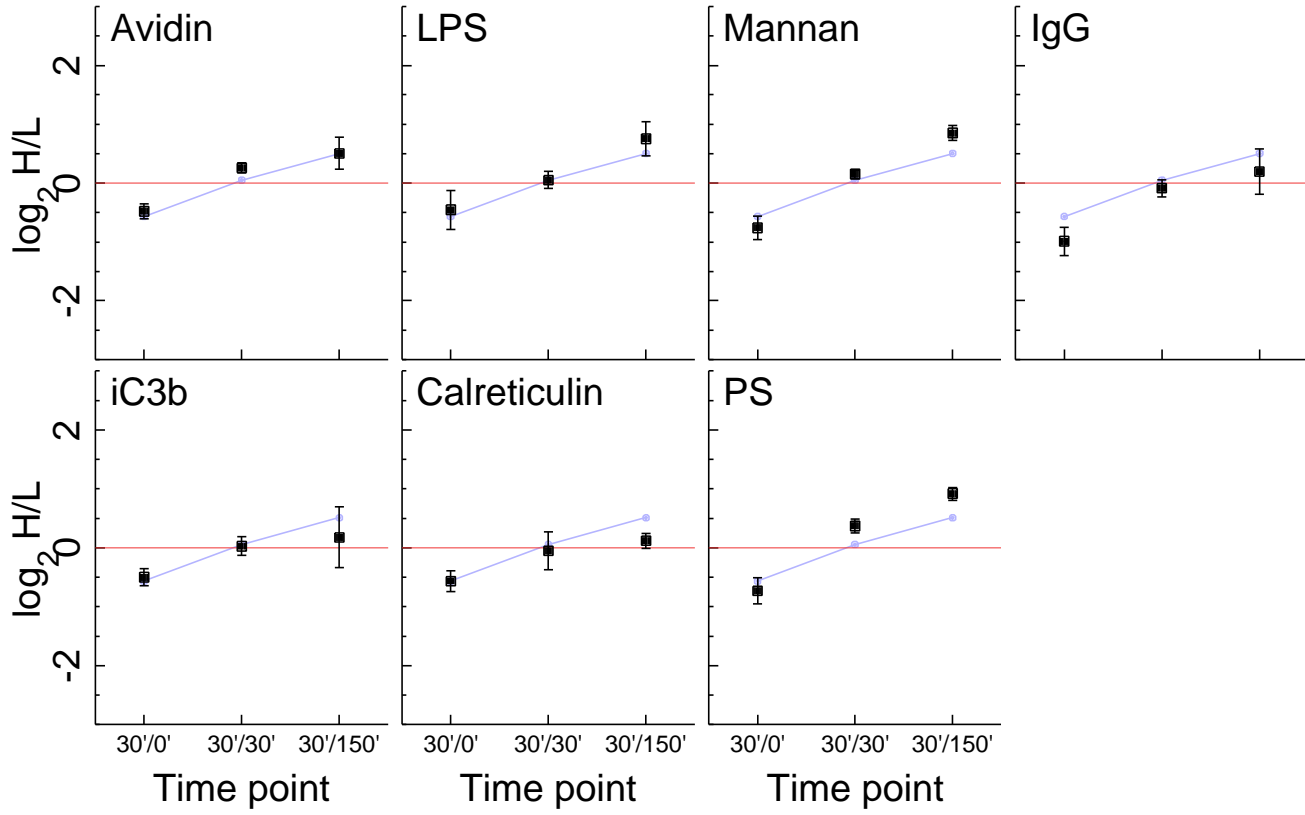

# ly9 (Q01965)

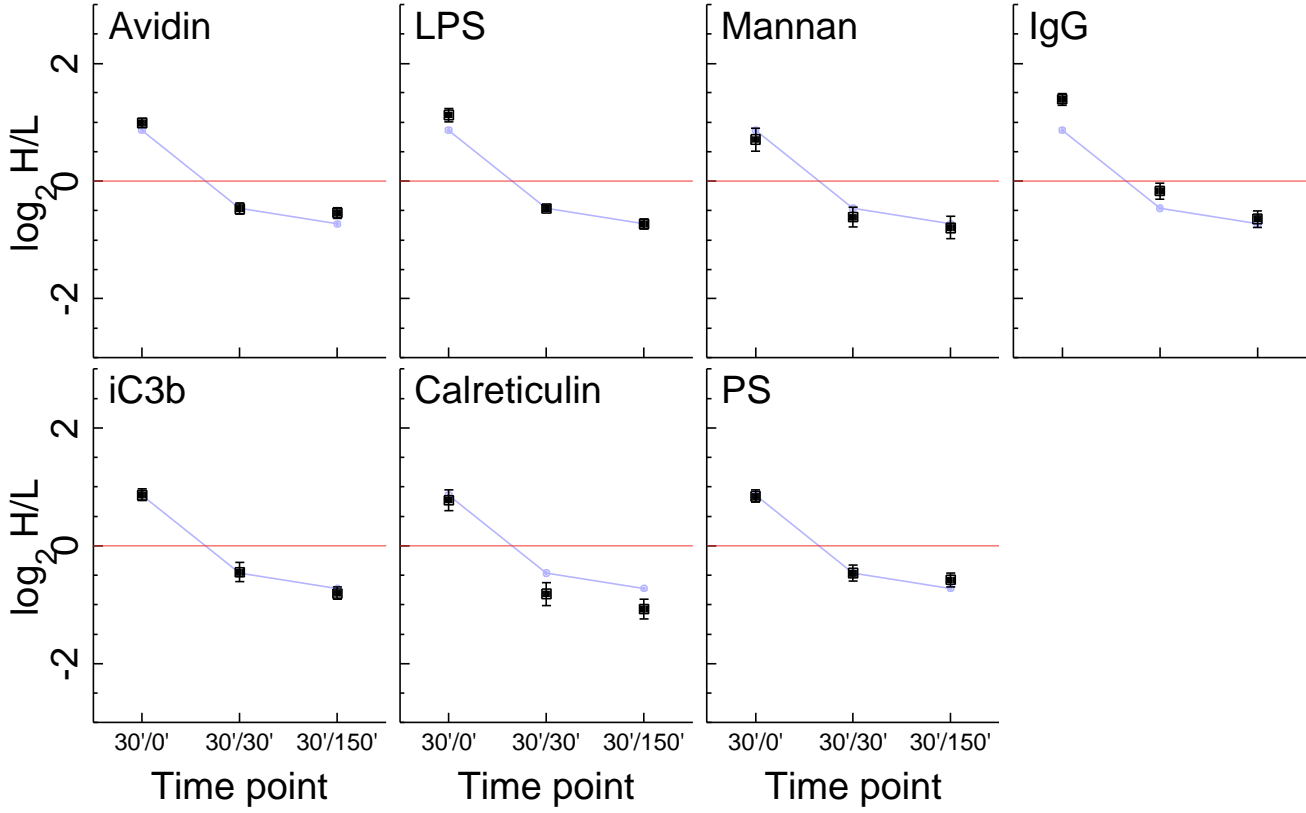

# lyn (P25911)

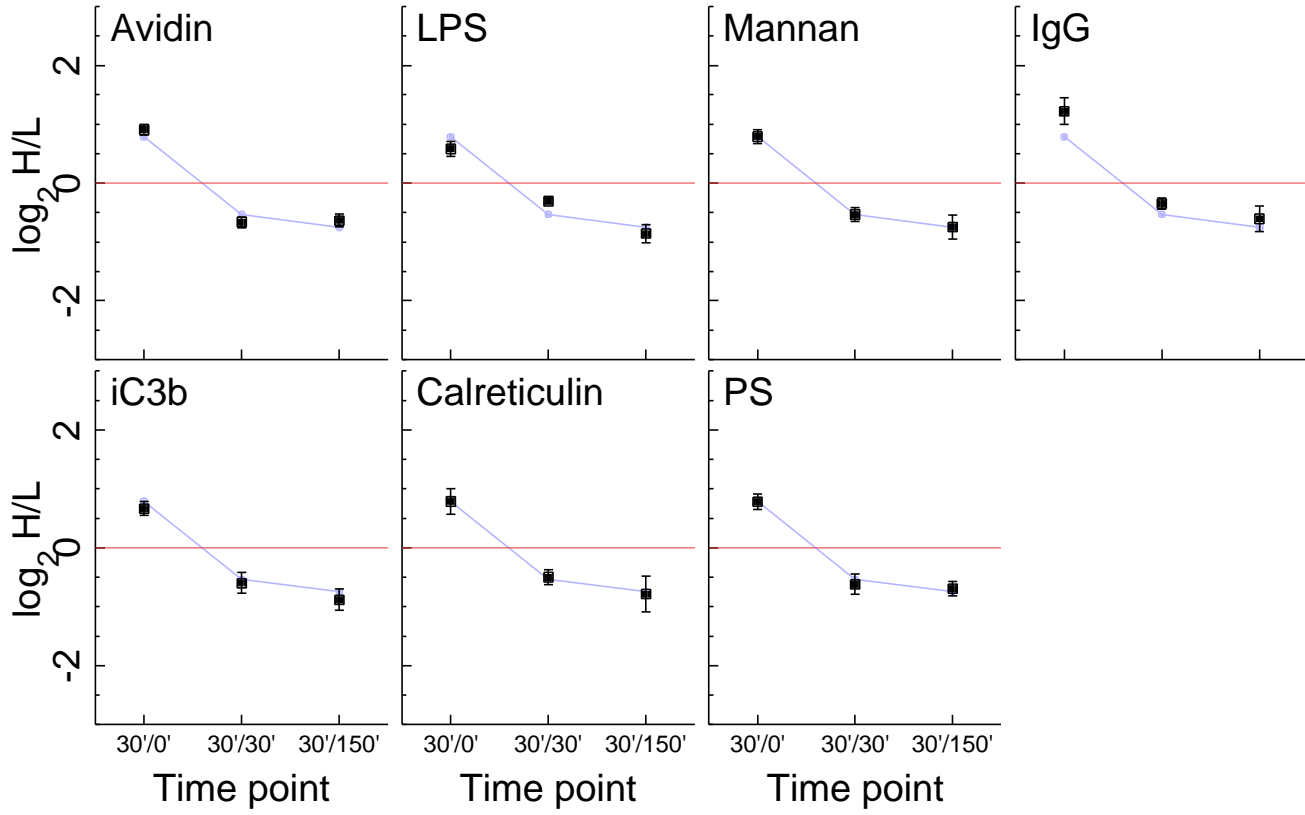

lypla2 (Q9WTL7)

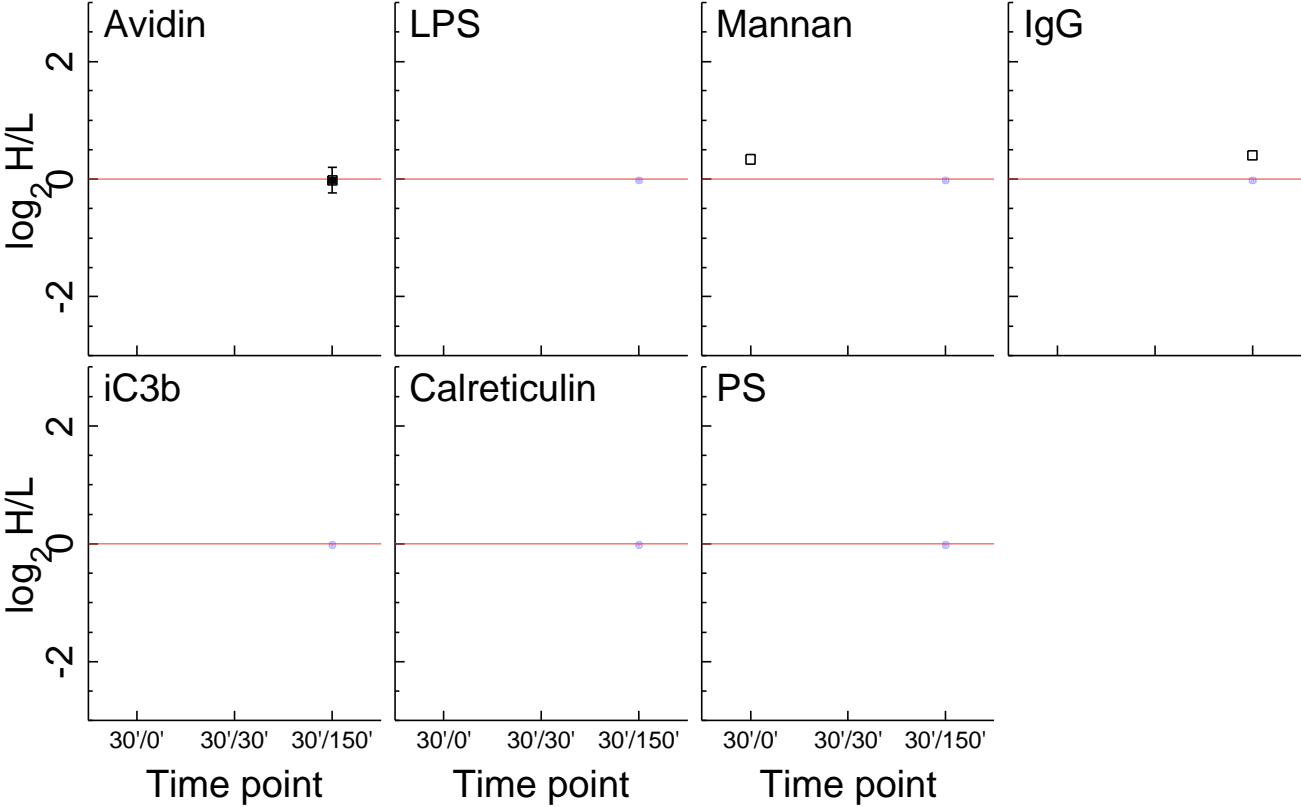

### lyz1 (P17897)

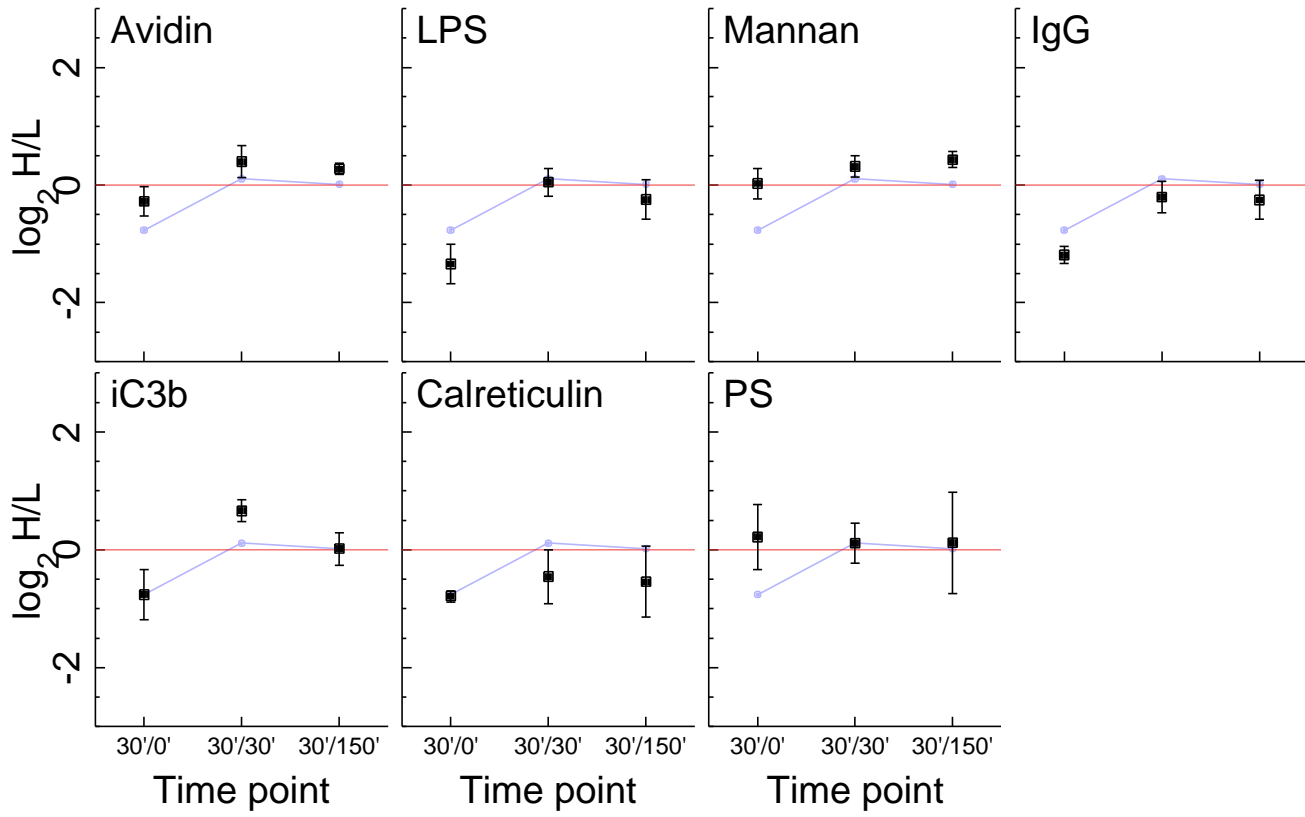

### lyz2 (P08905)

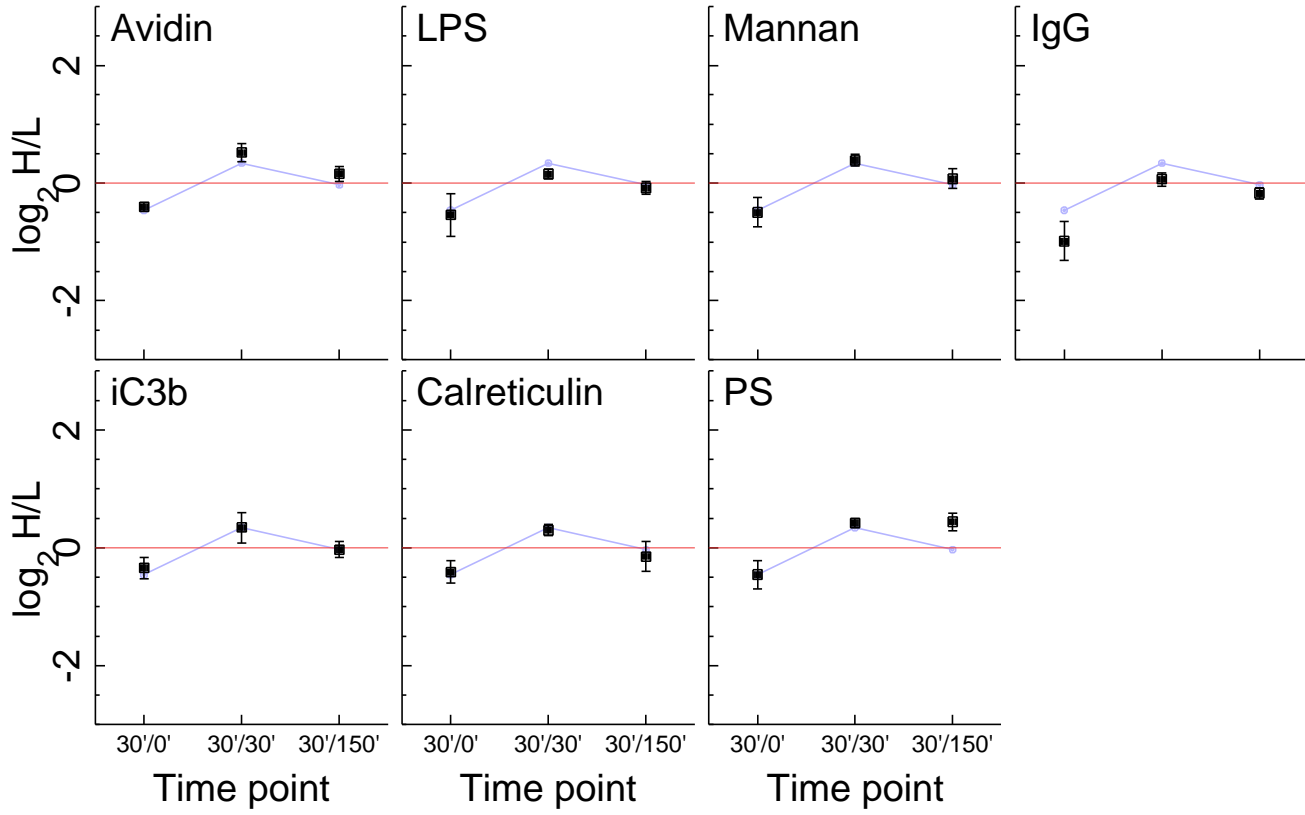

### m6pr (P24668)

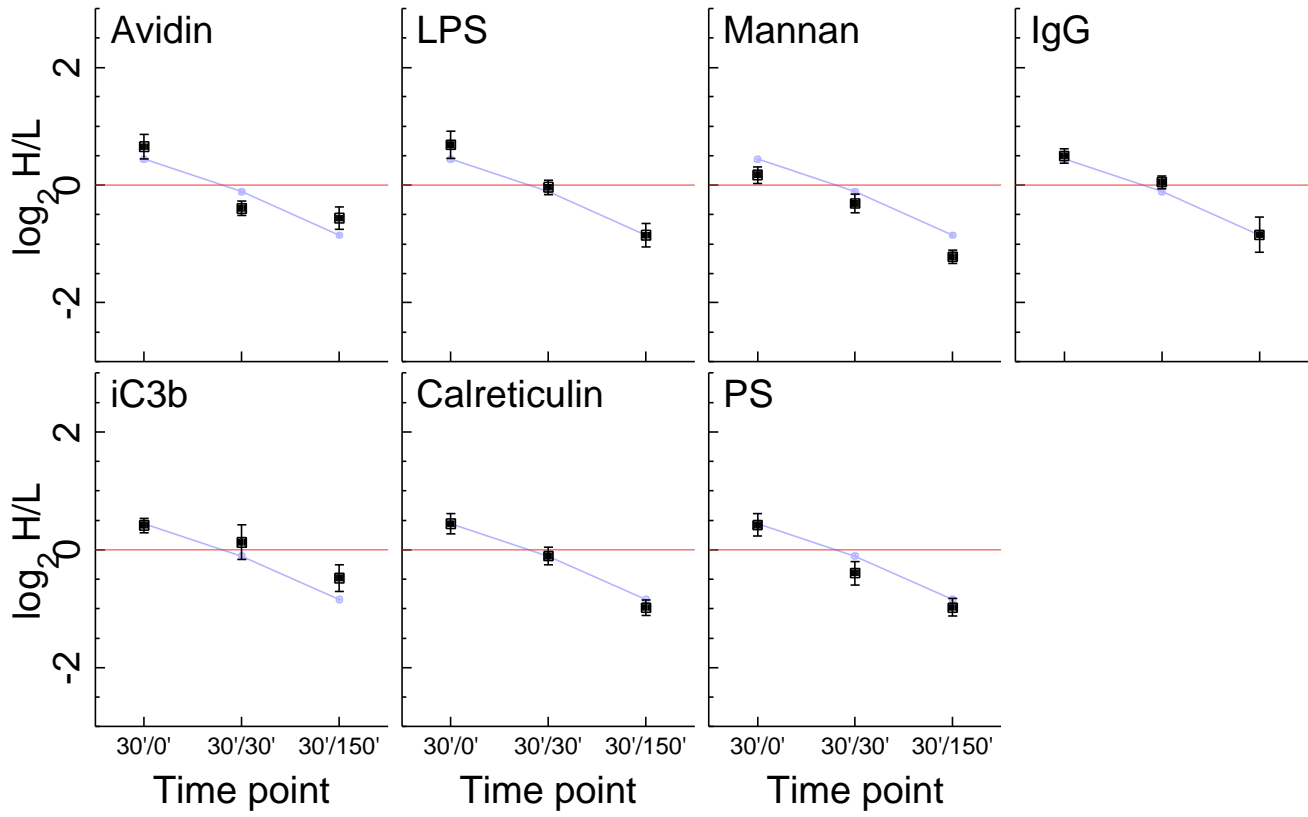

macf1 (E9PVY8)

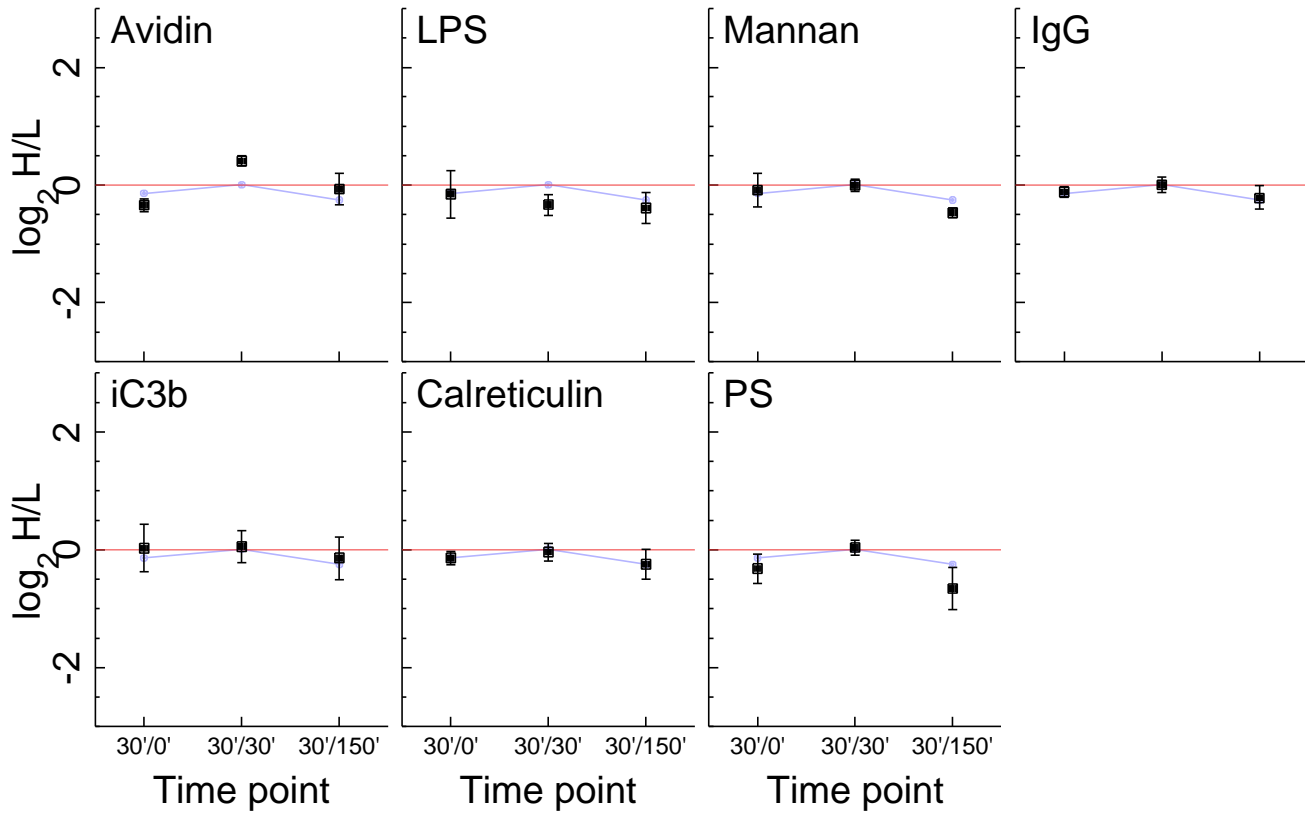



magt1 (A2ADH1)

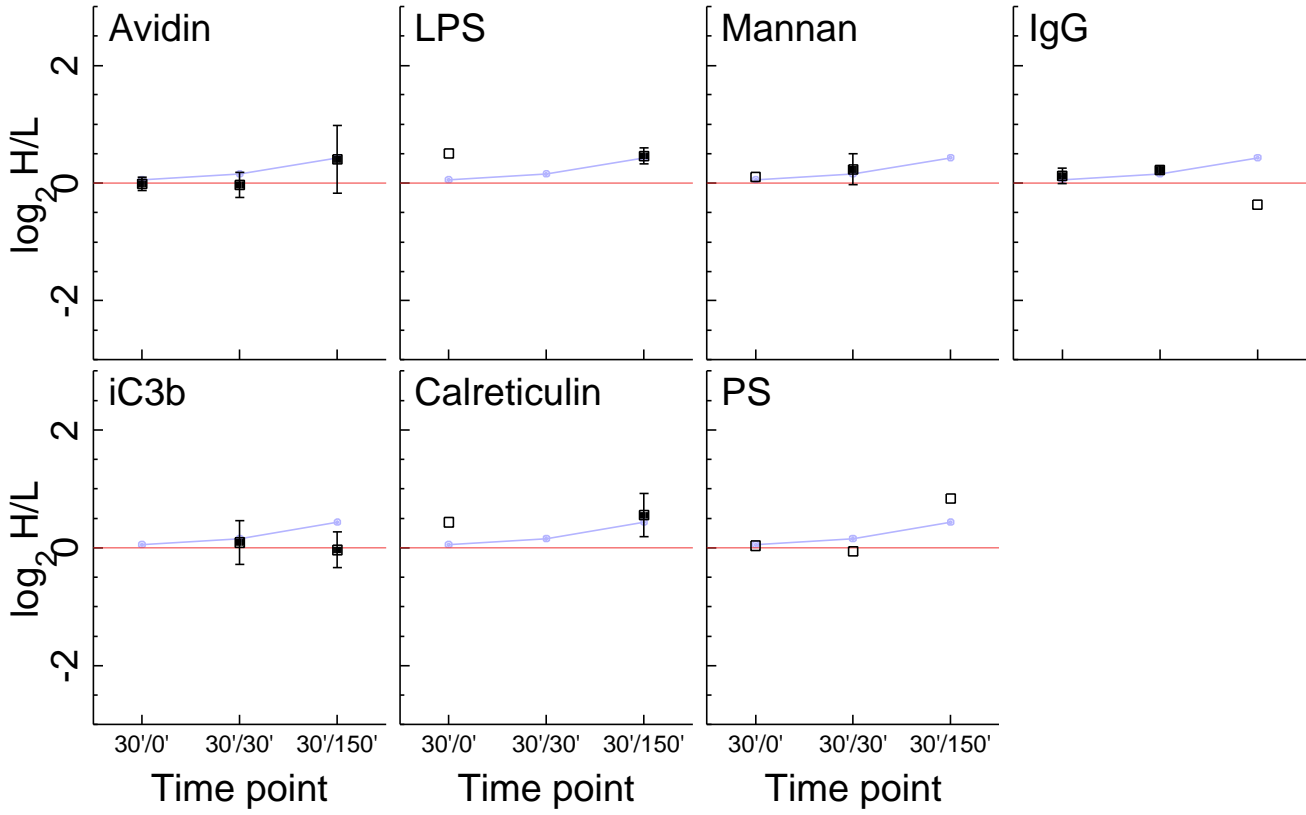

man1a1 (P45700)

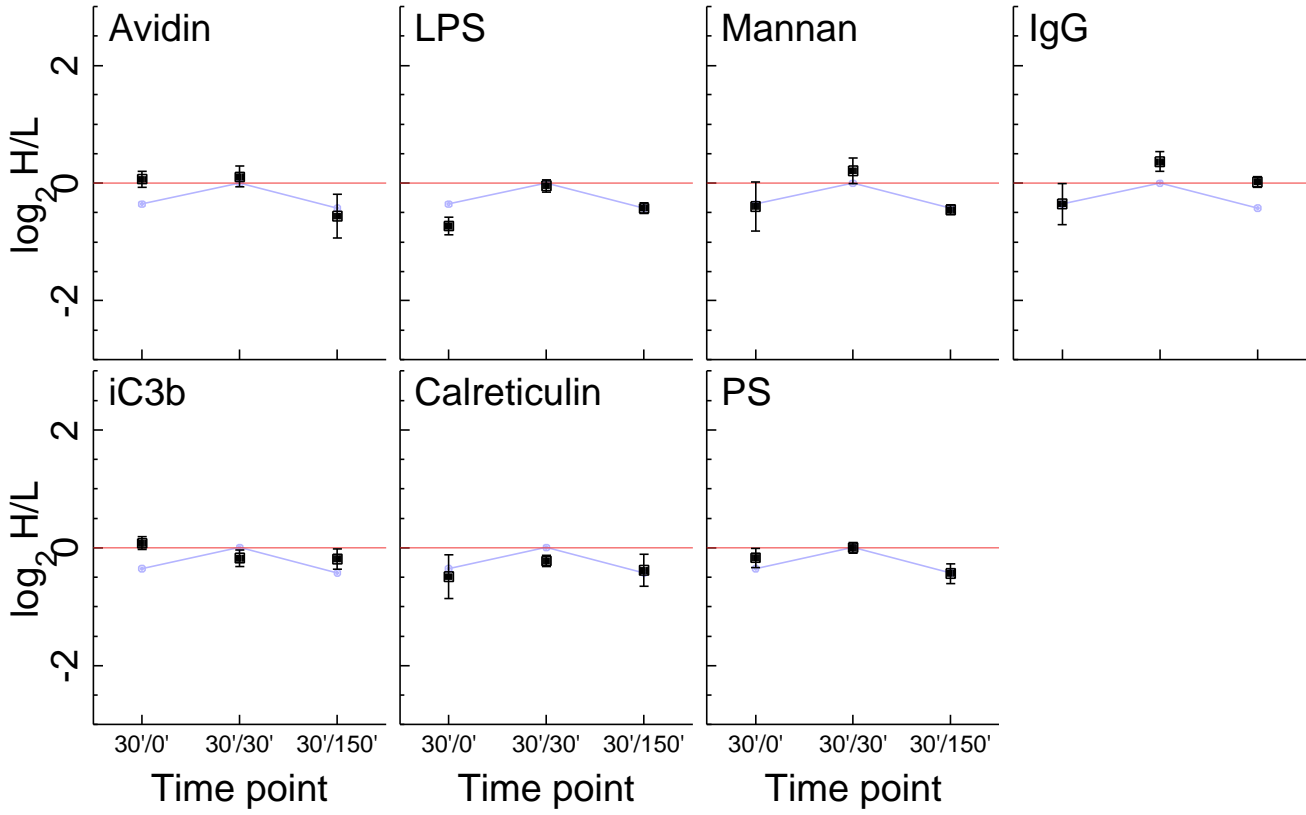

### man1c1 (Q6NXK9)

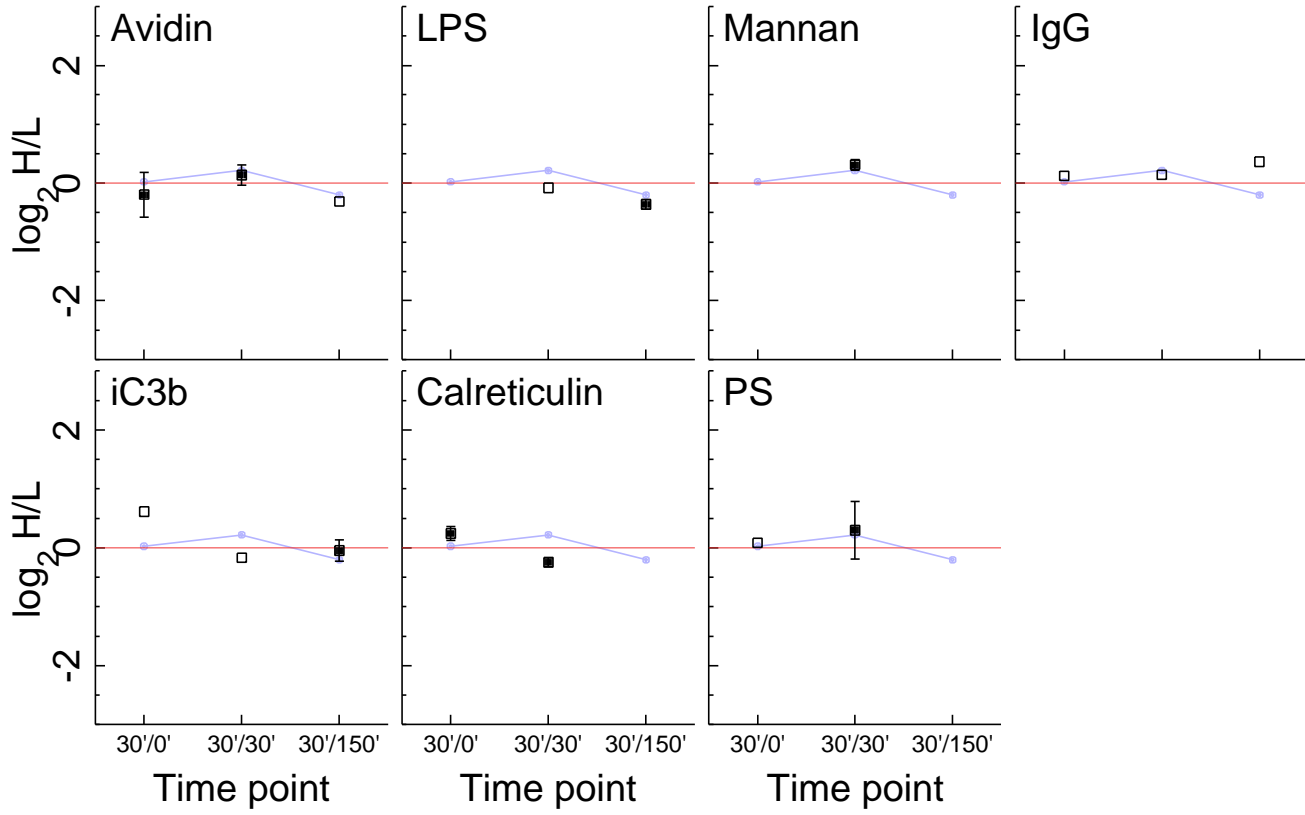

man2a1 (P27046)

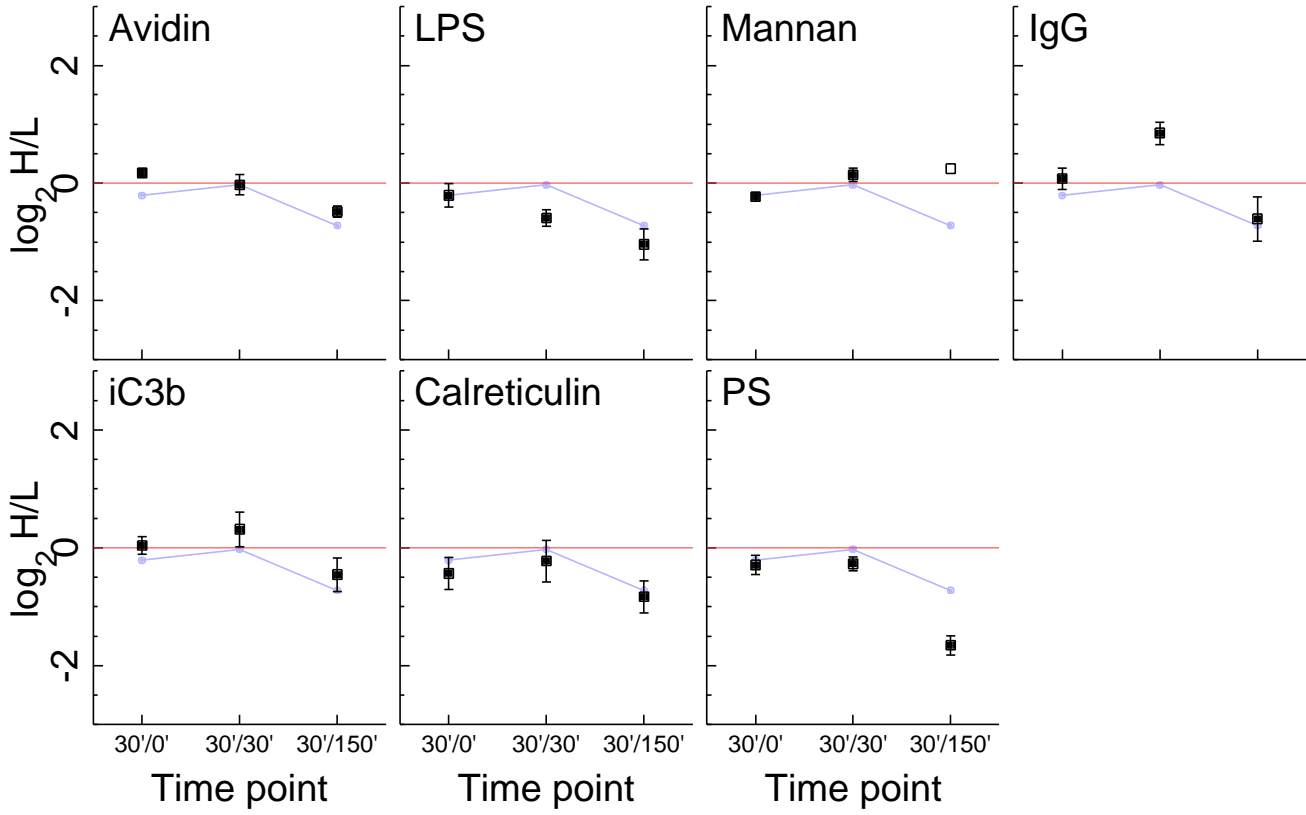

man2b1 (O09159)

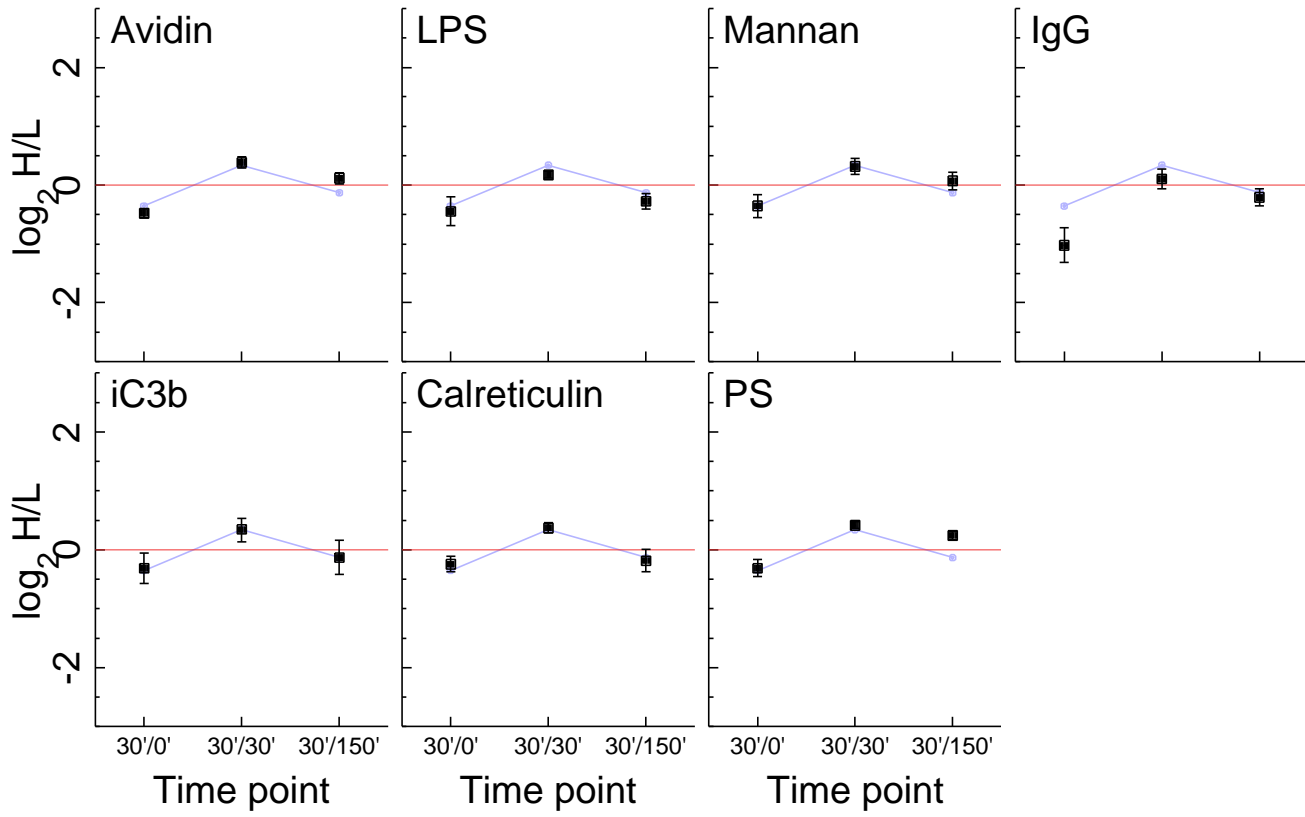

man2b2 (O54782)

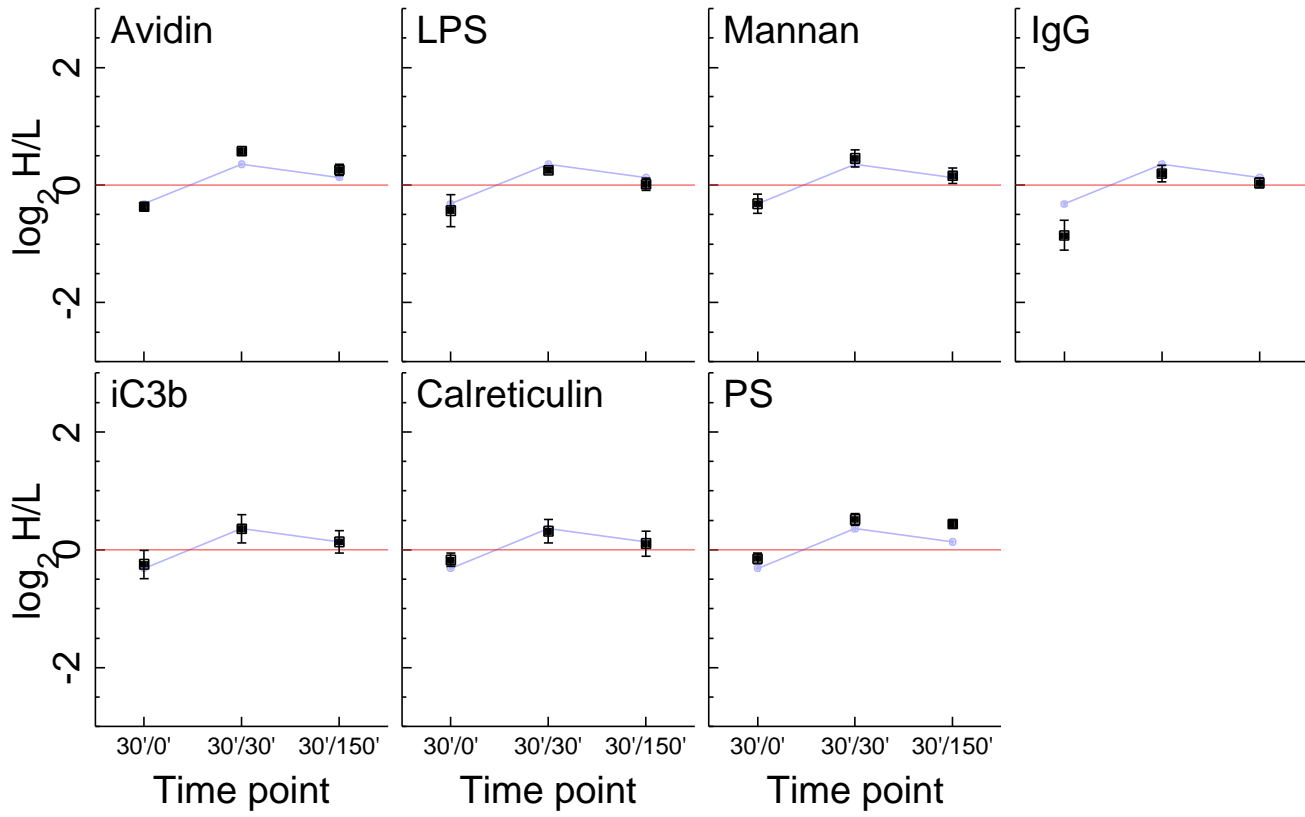

manba:1 (D6RGR1)

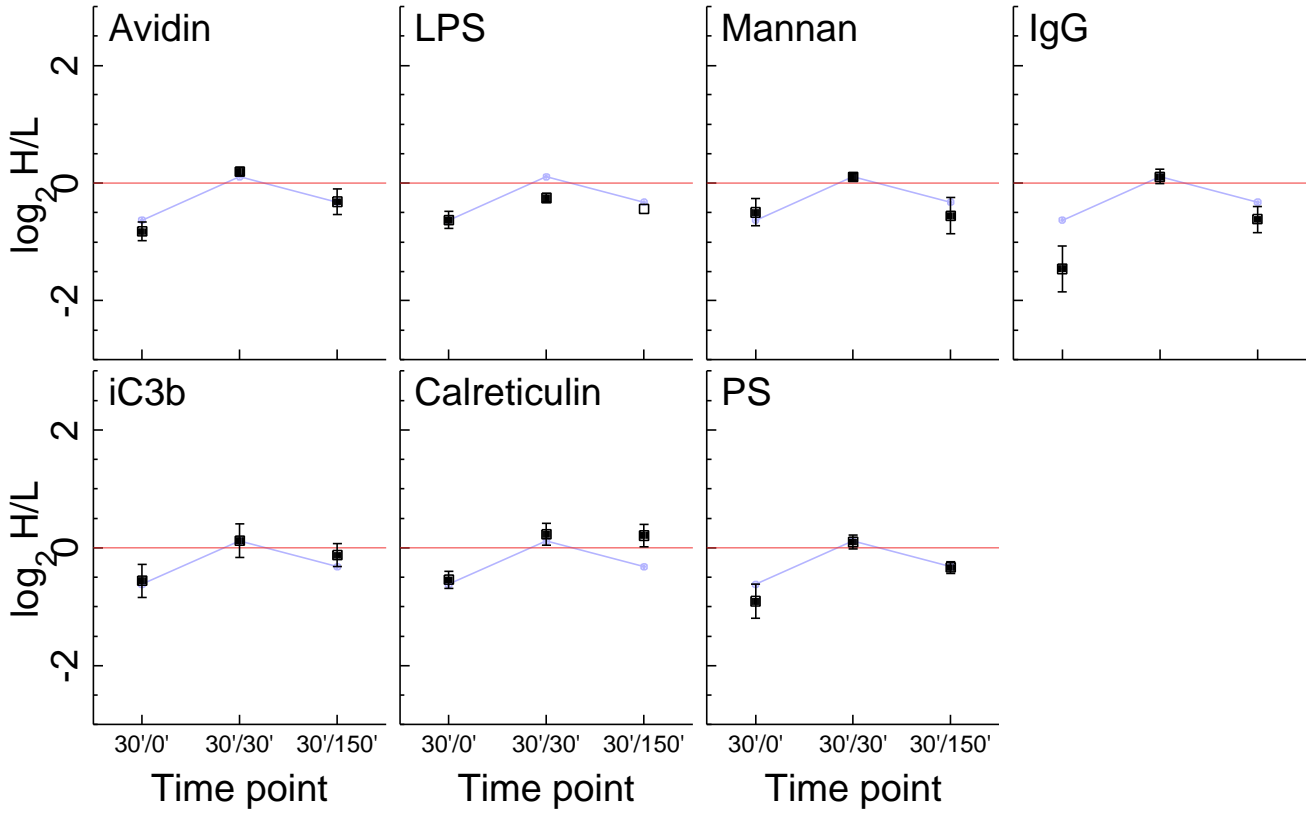

manba:2 (Q8K2I4)

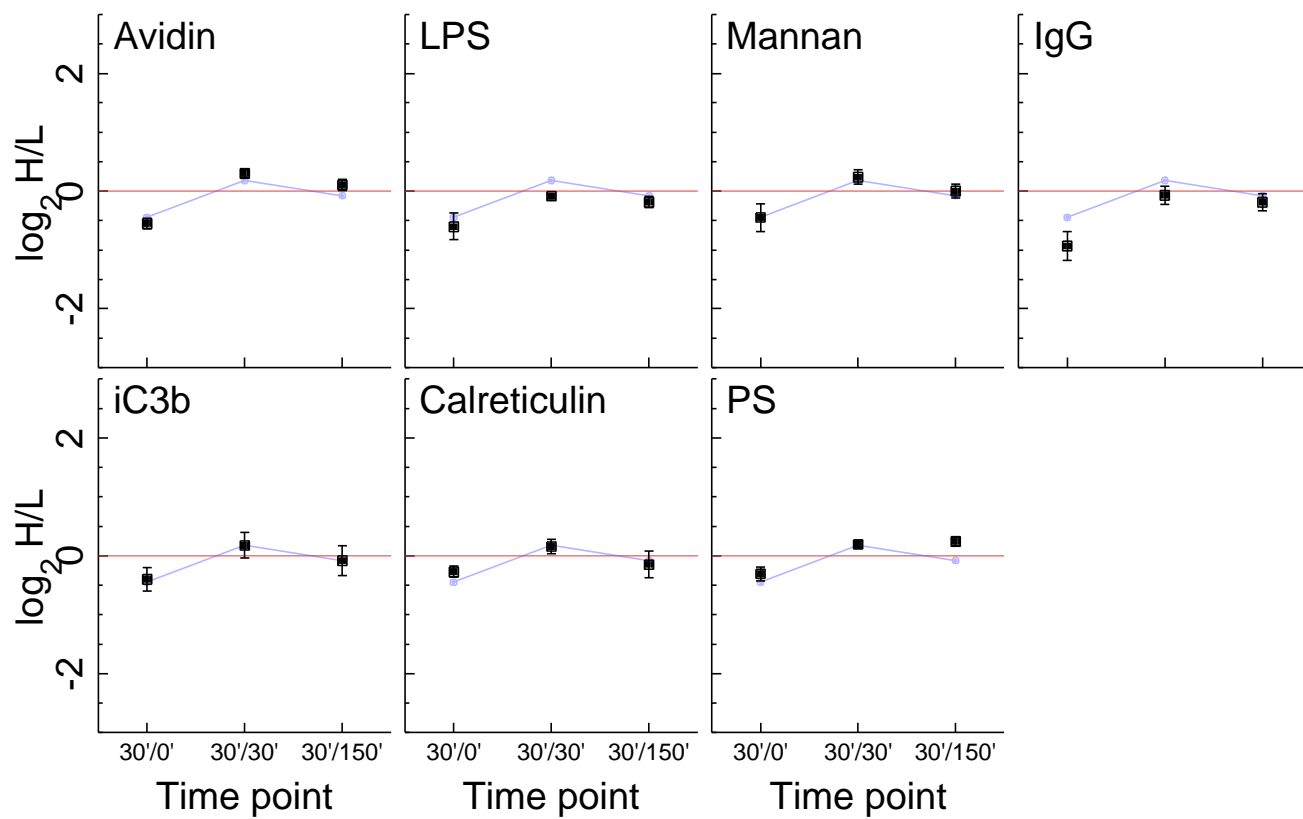



manf (Q3TMX5)

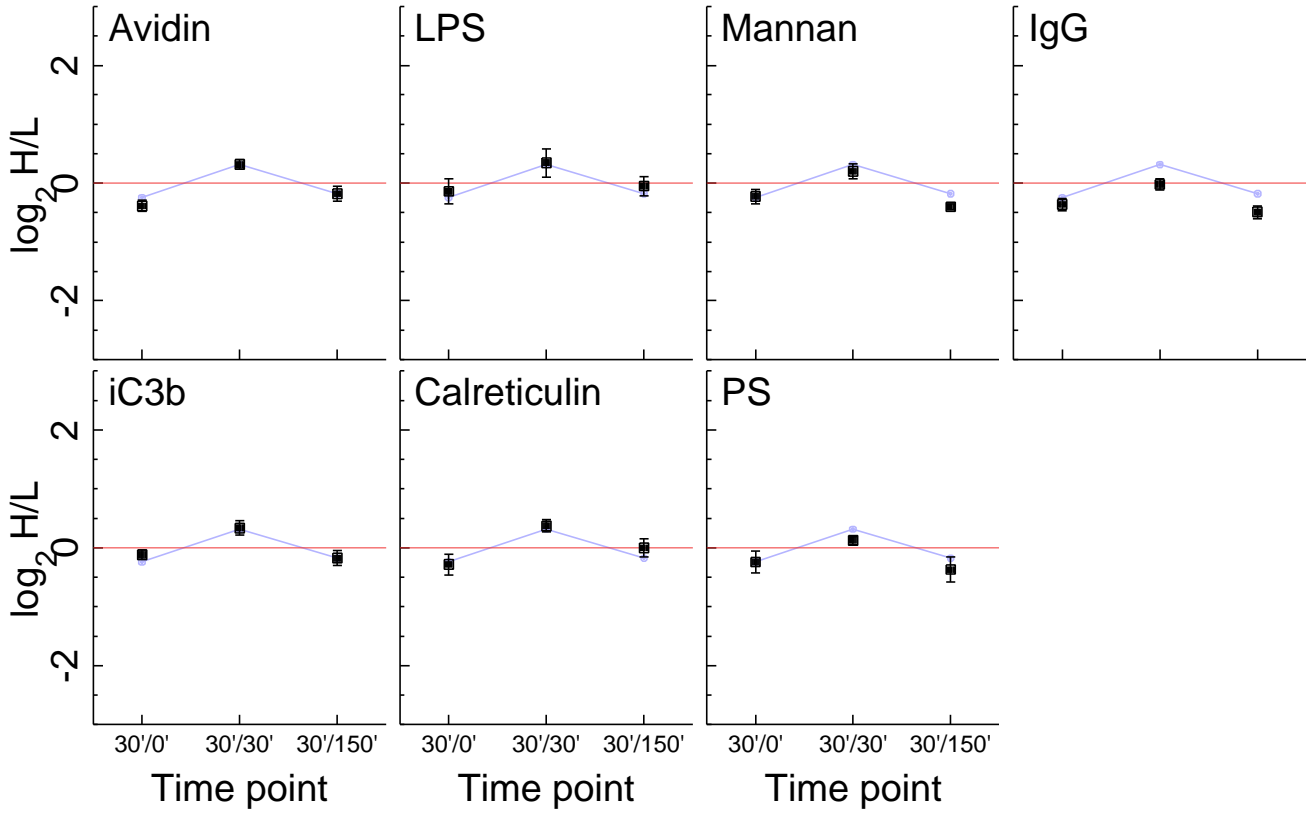

map1s (Q8C052)

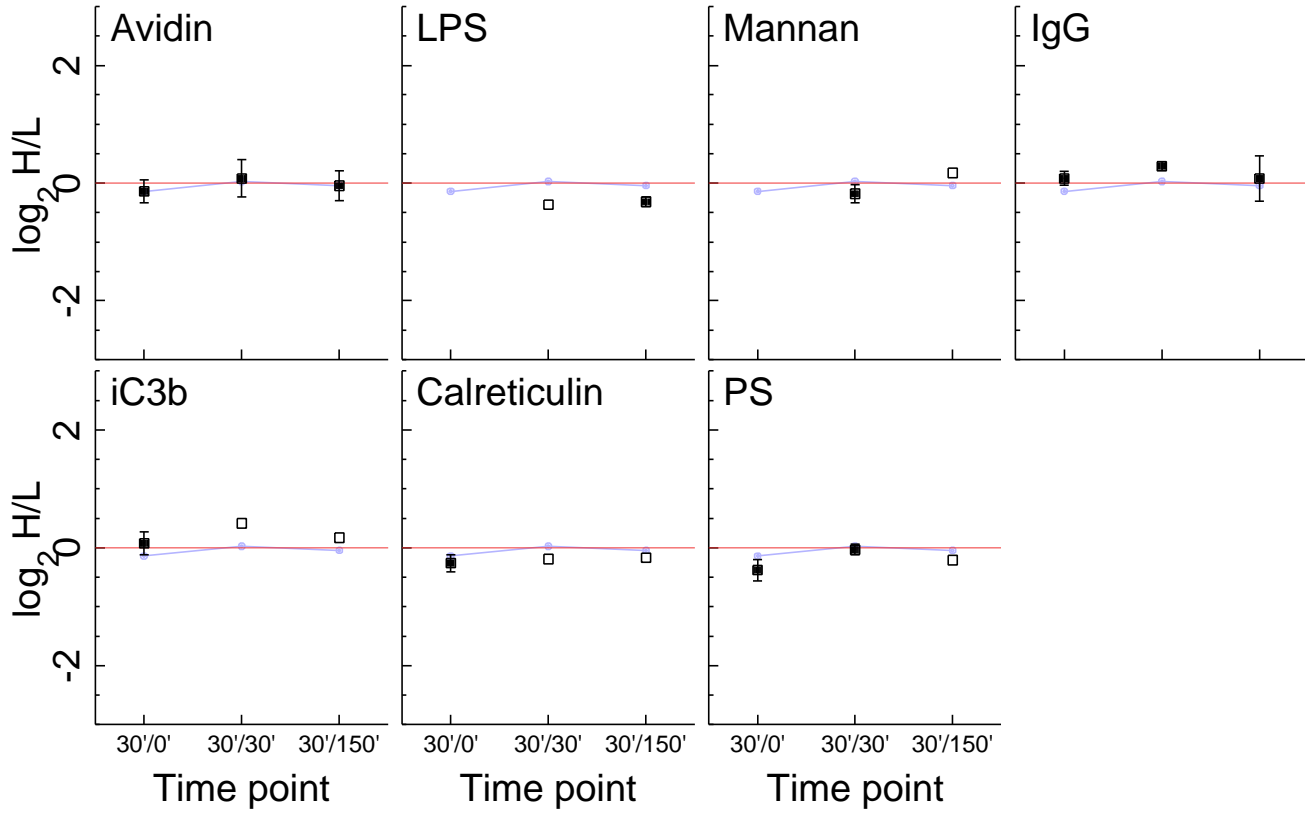

### map2k1 (P31938)

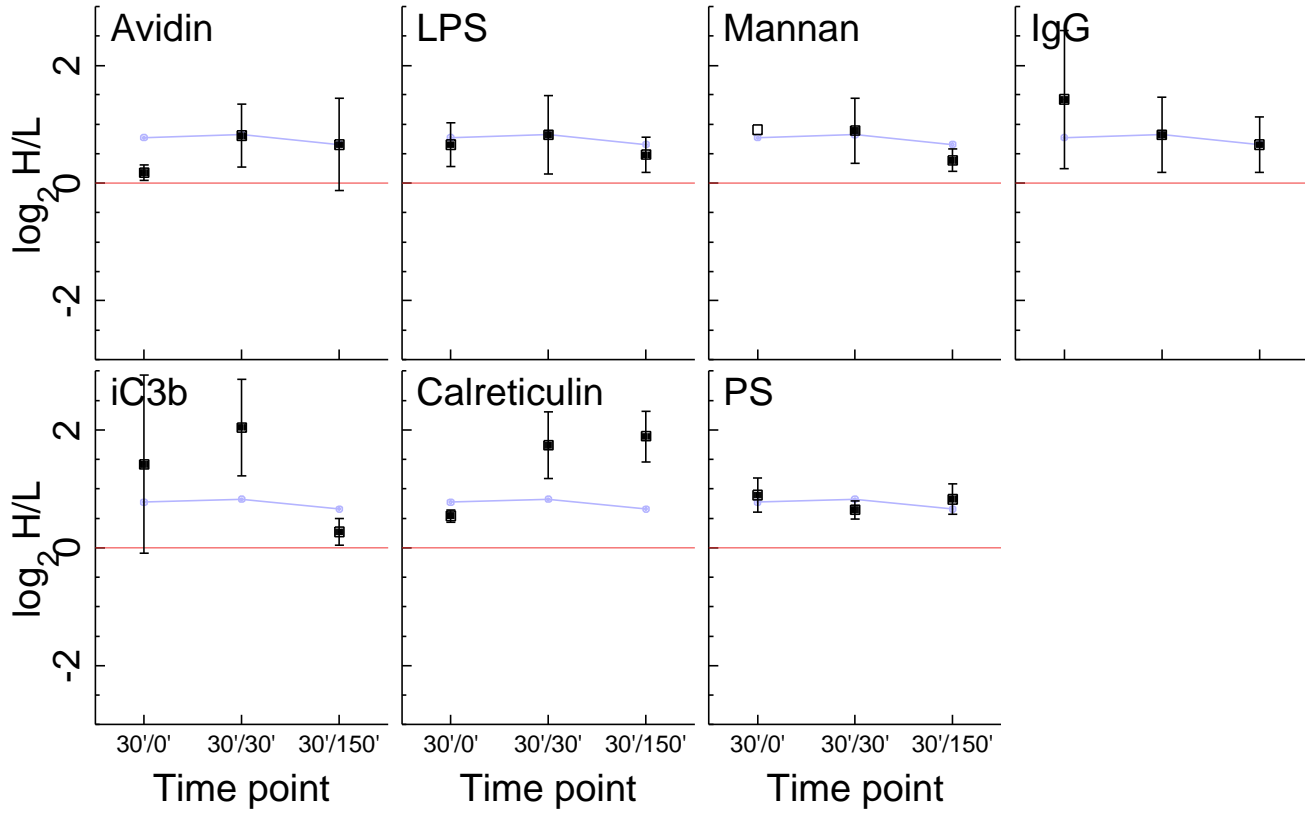

### map2k4 (P47809)

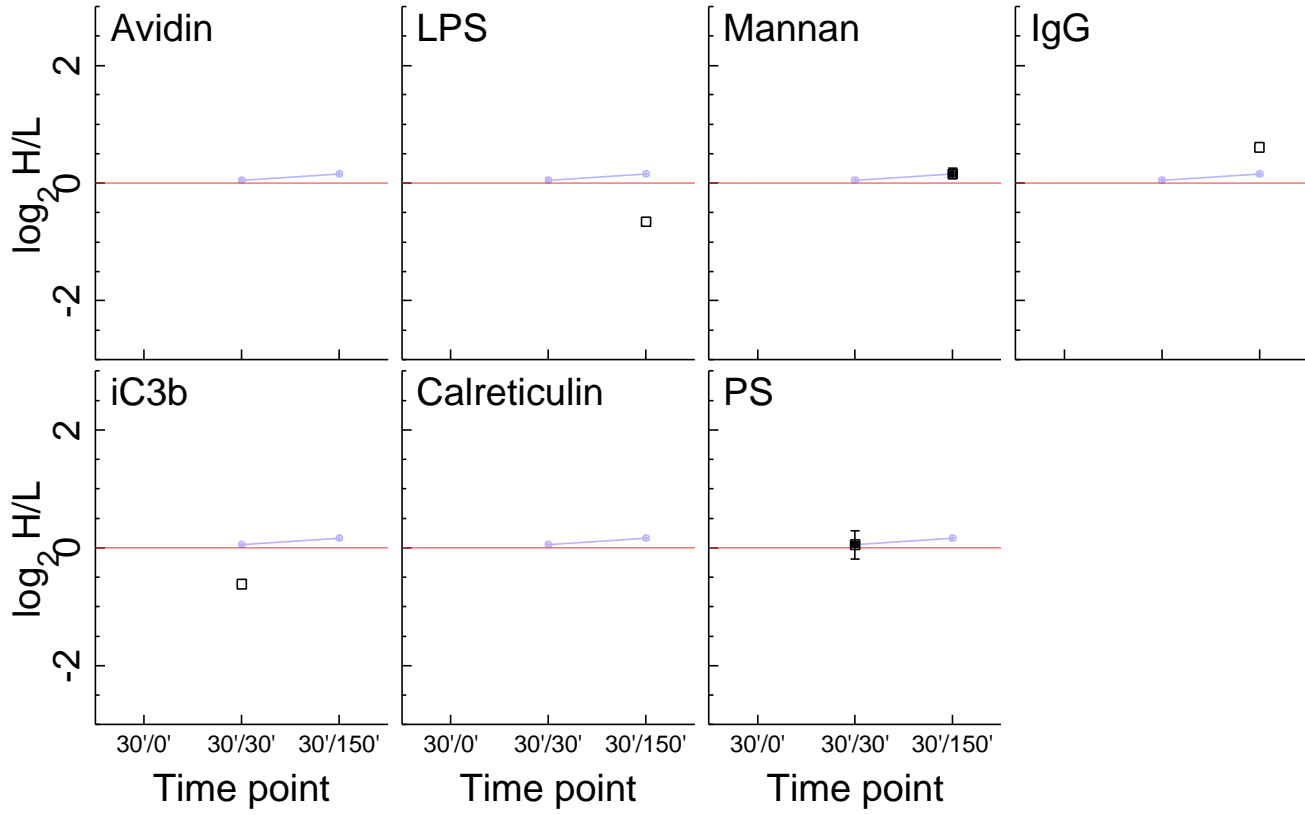

map3k11 (Q80XI6)

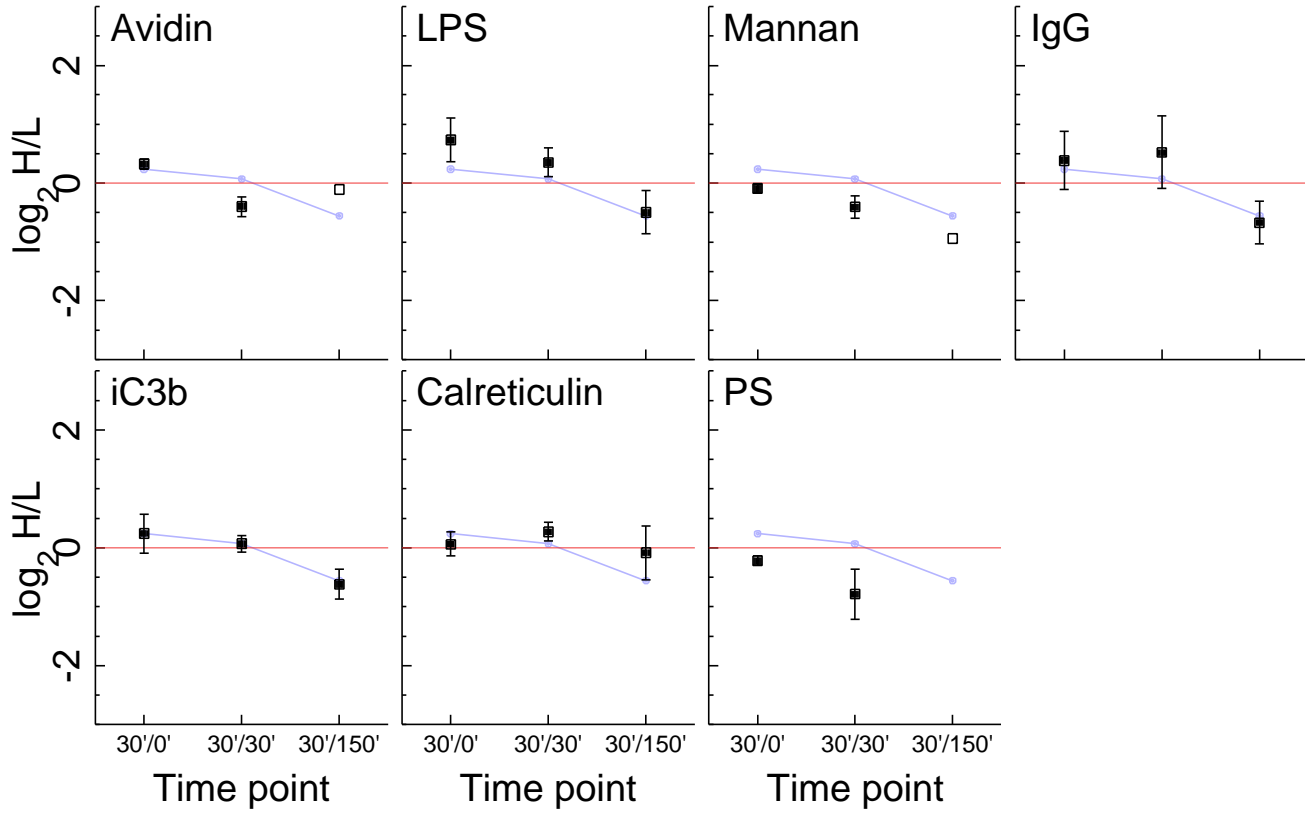

map4 (P27546)

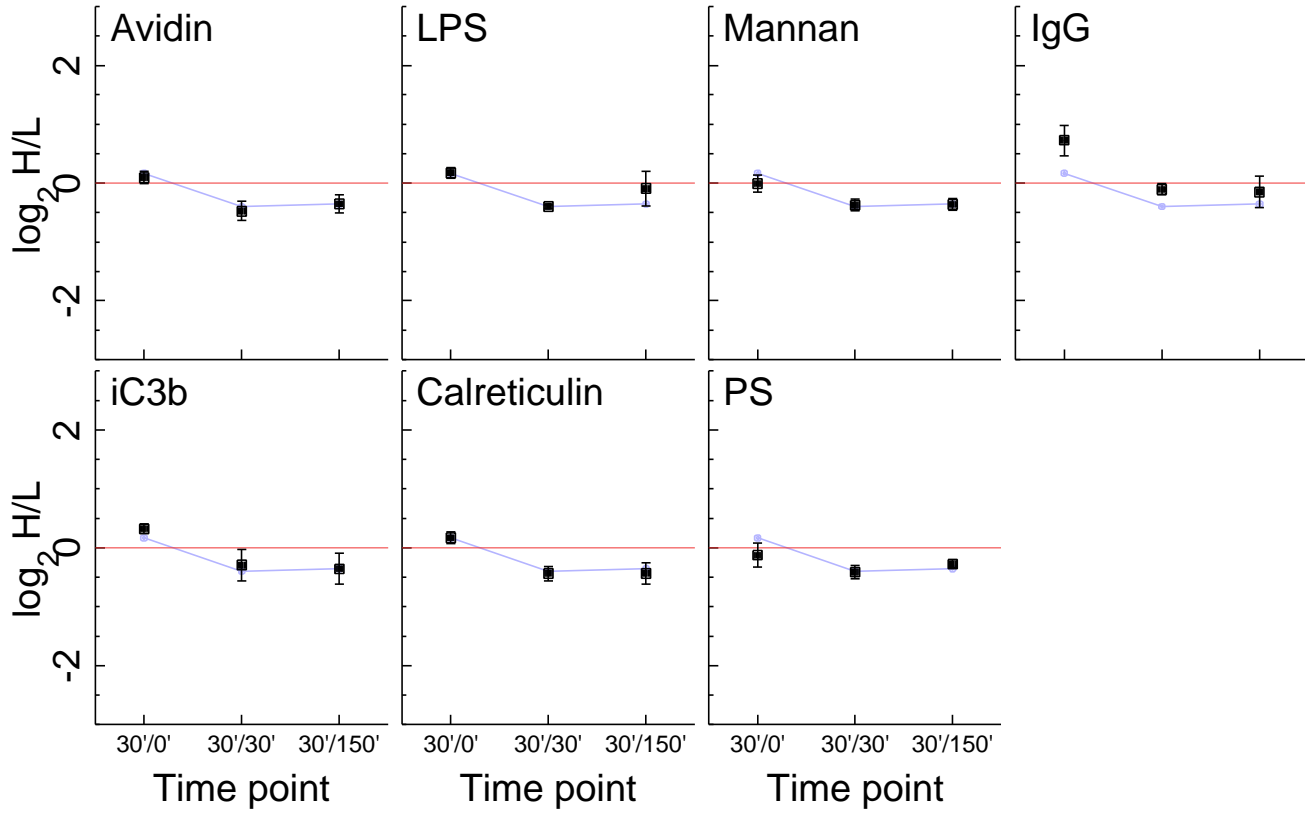

mapre1 (Q61166)

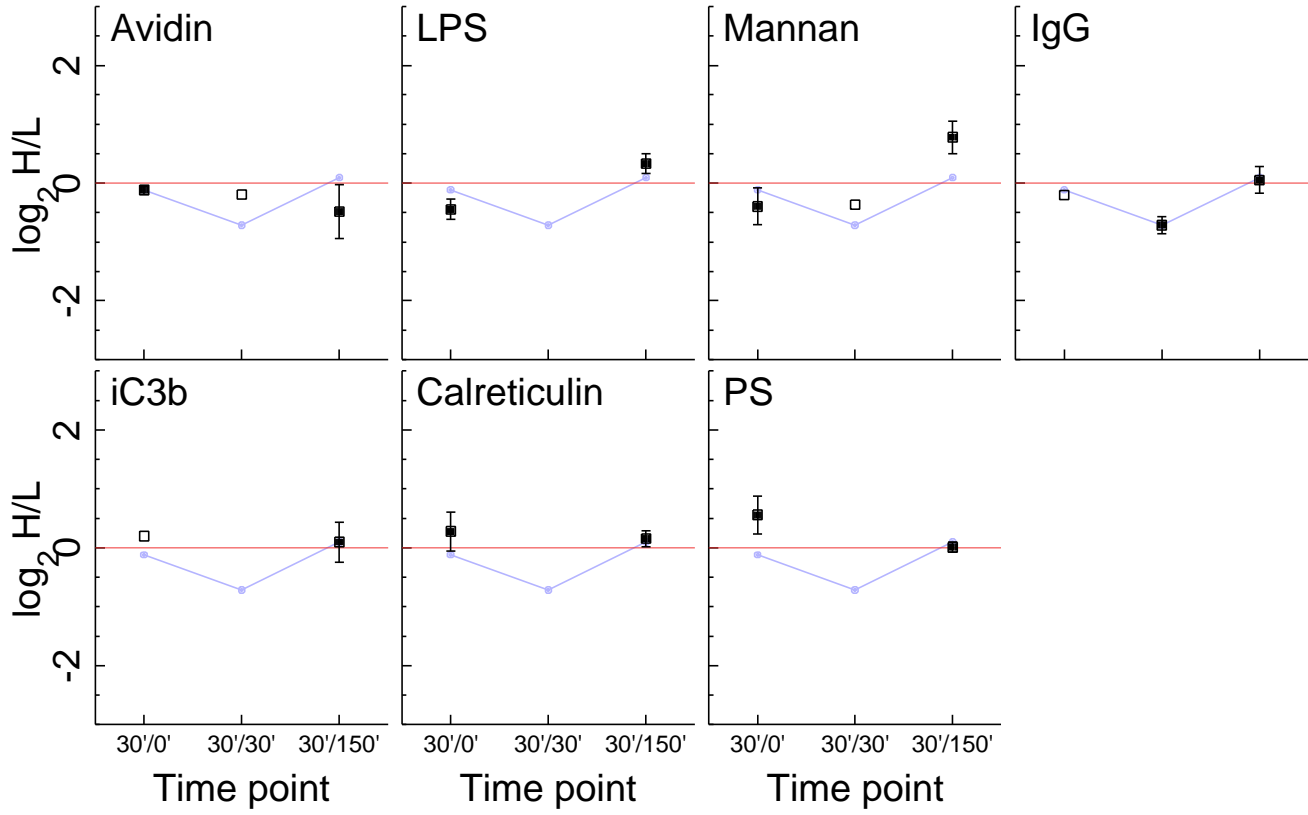

marc2 (Q922Q1)

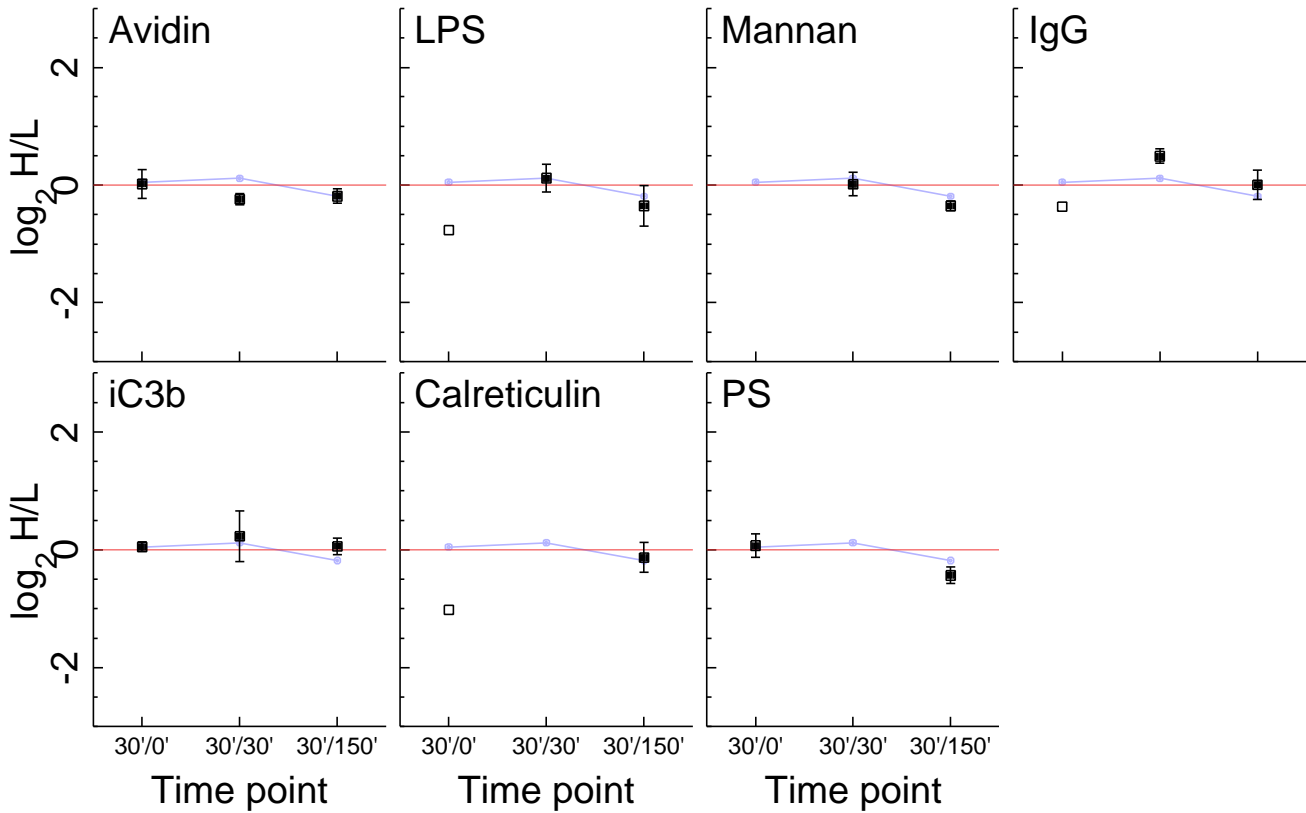



marcks11 (P28667)

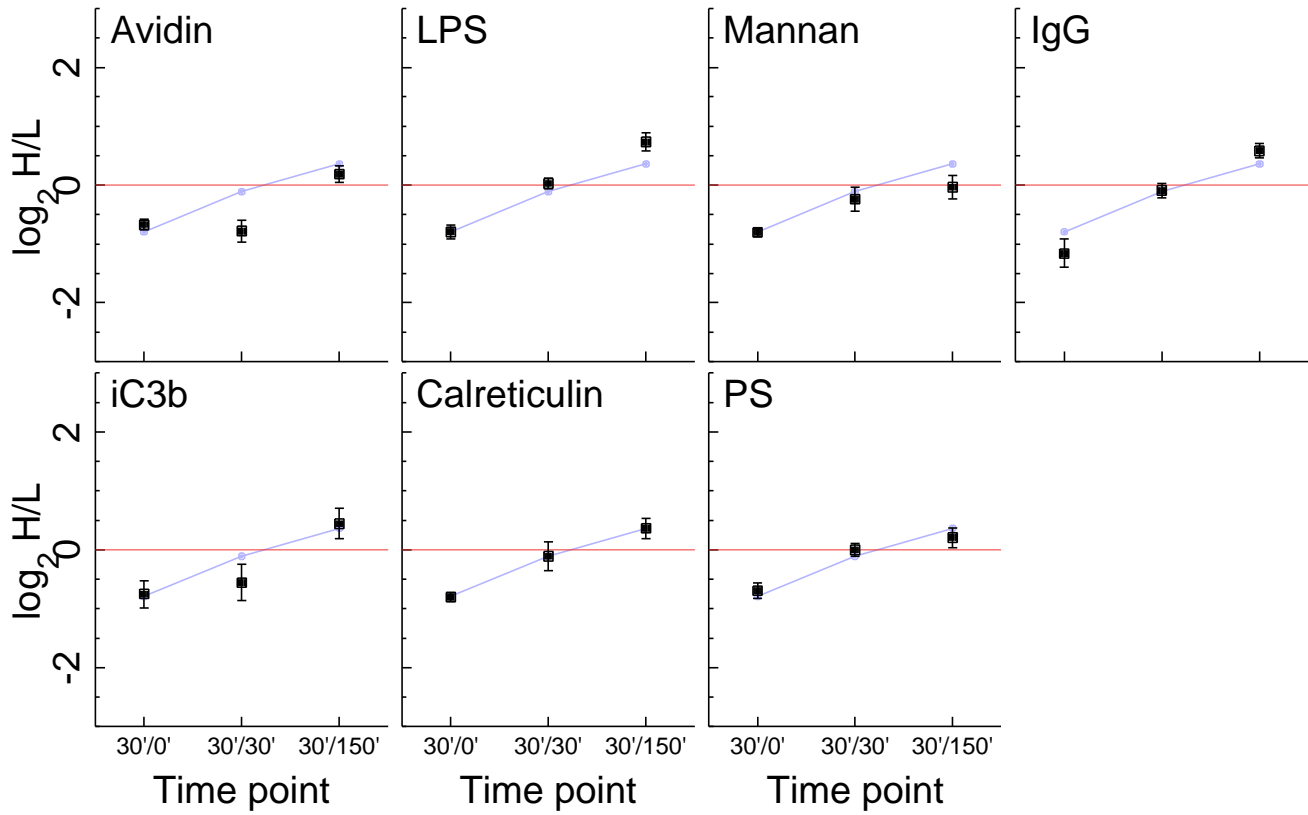

marcks (P26645)

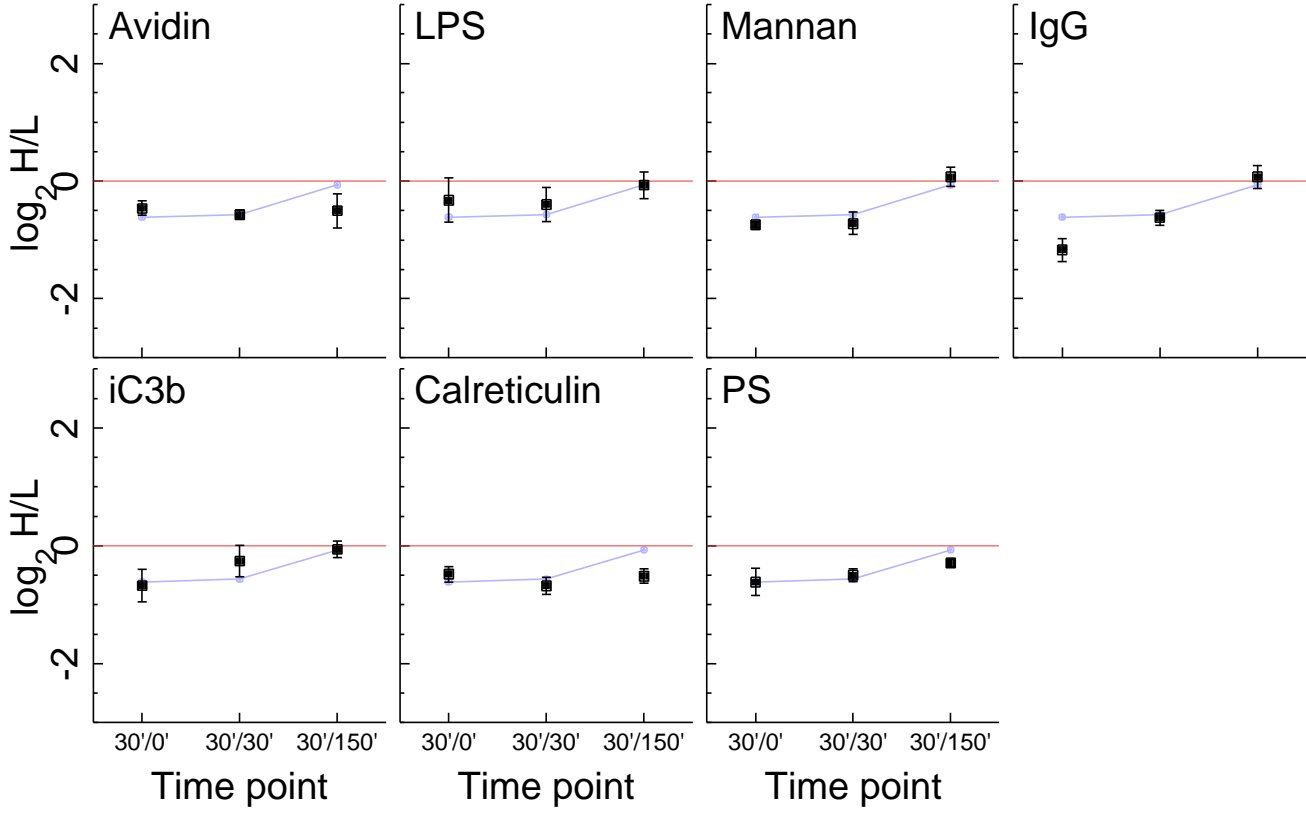

### mark2 (E9QMP6)

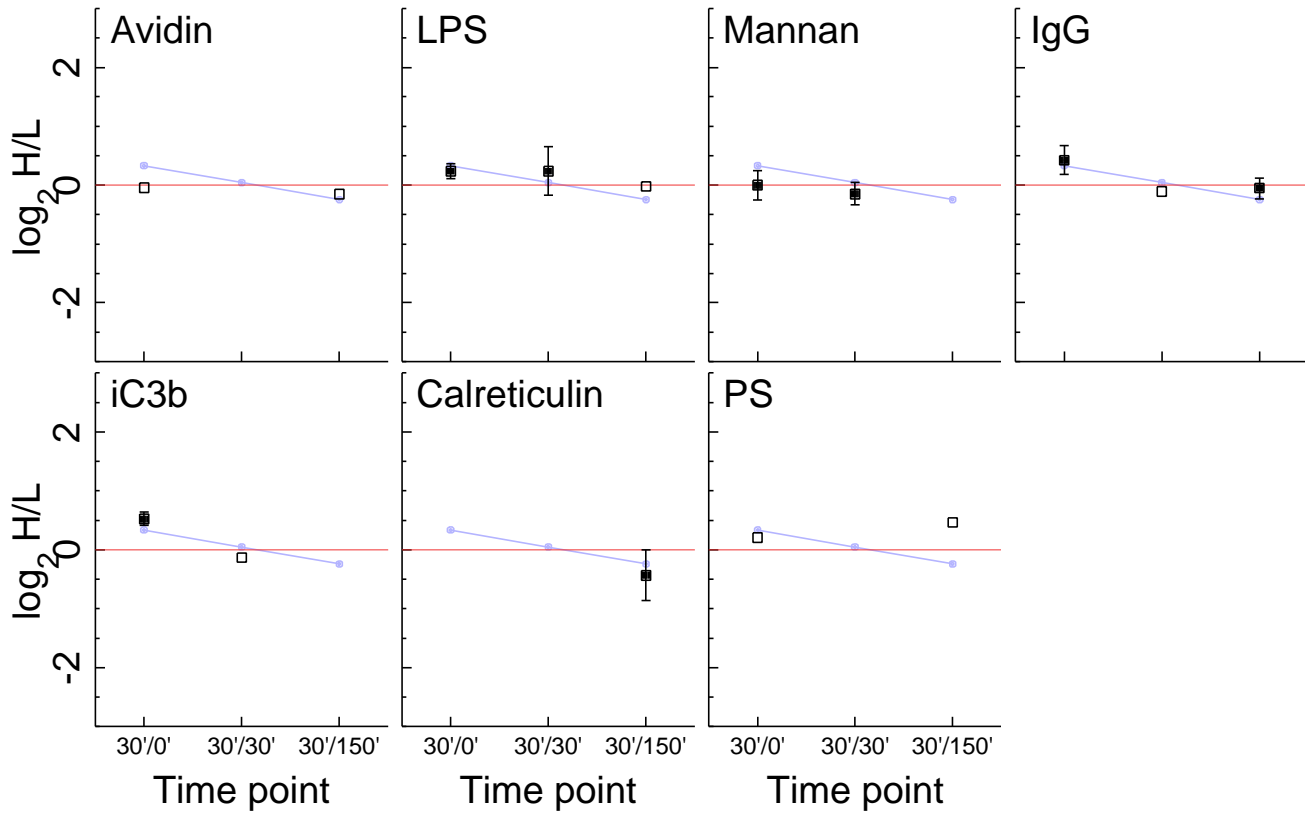

matr3 (Q8K310)

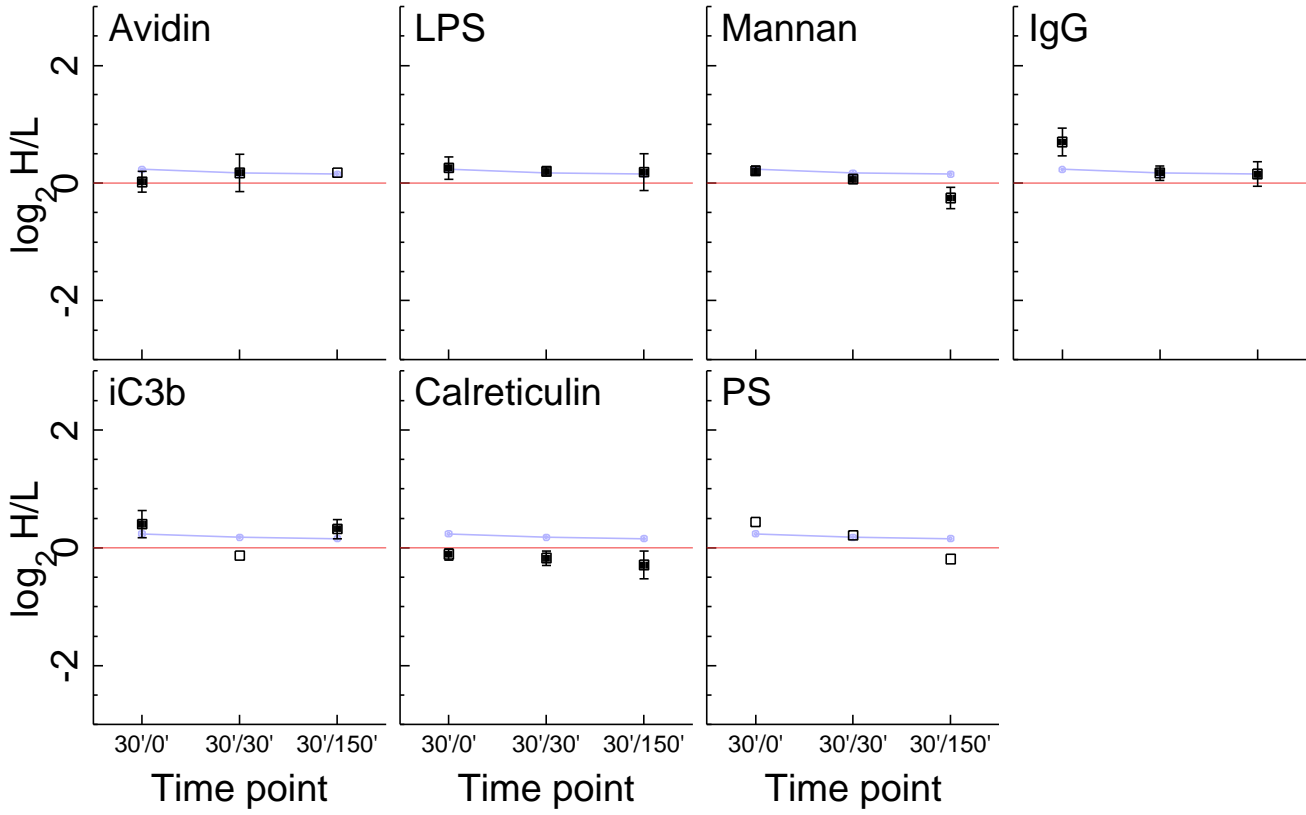

mavs (Q8VCF0)

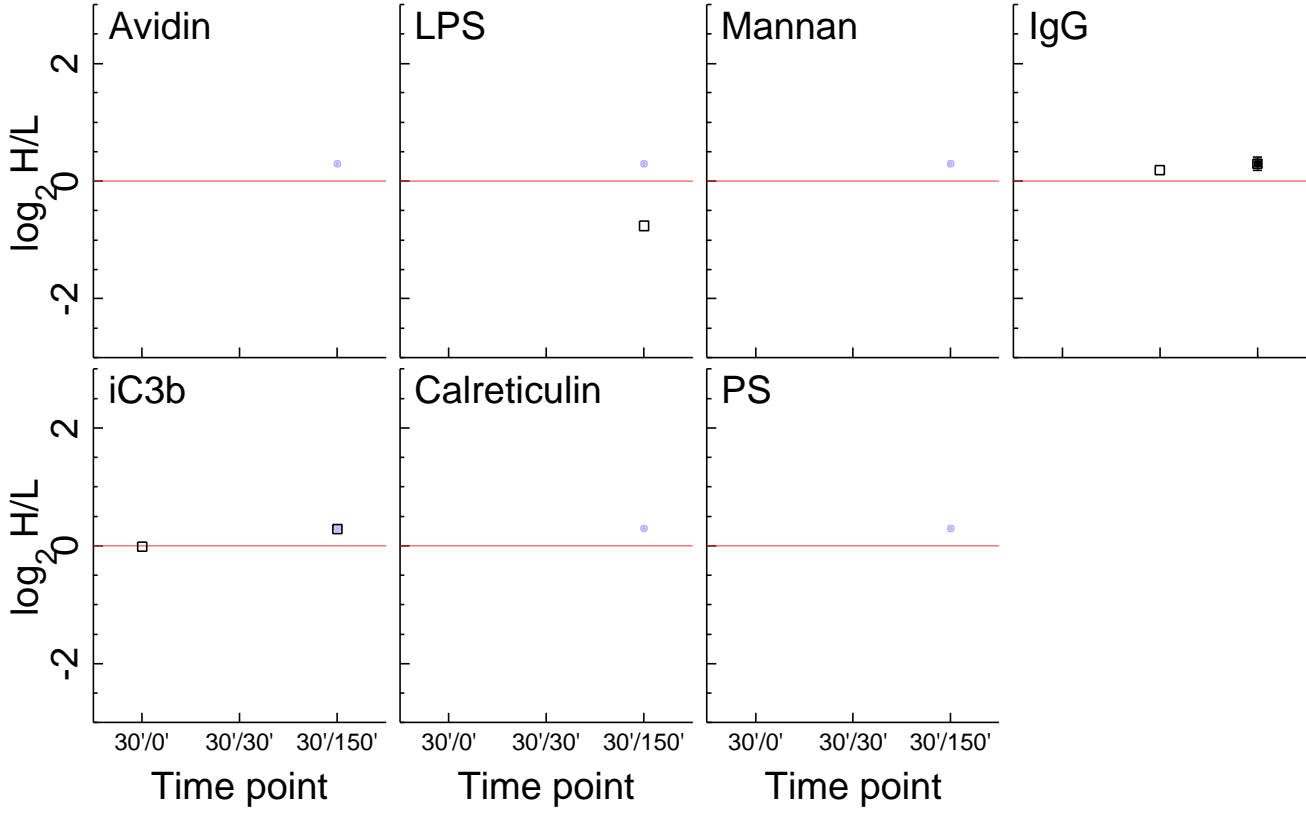

mboat7 (Q8CHK3)

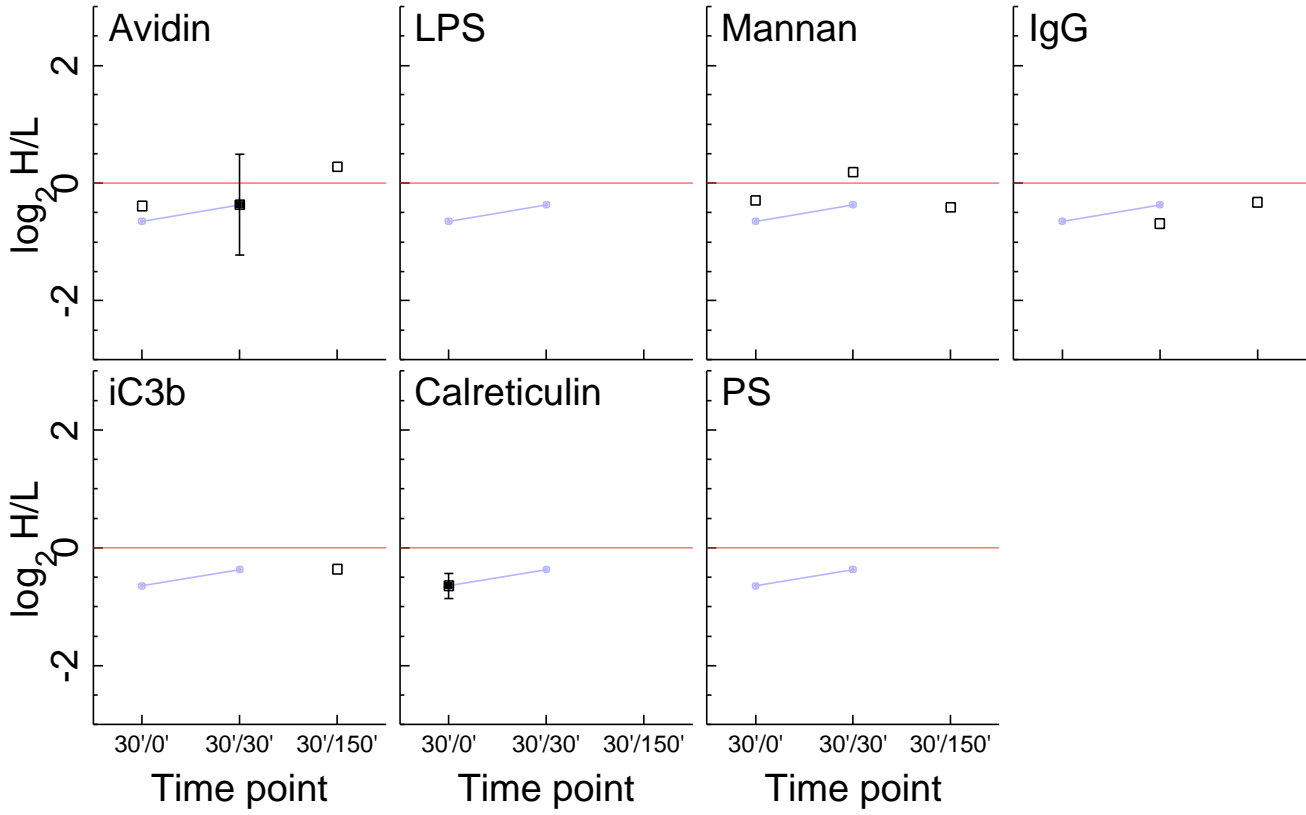

mbp (P04370)

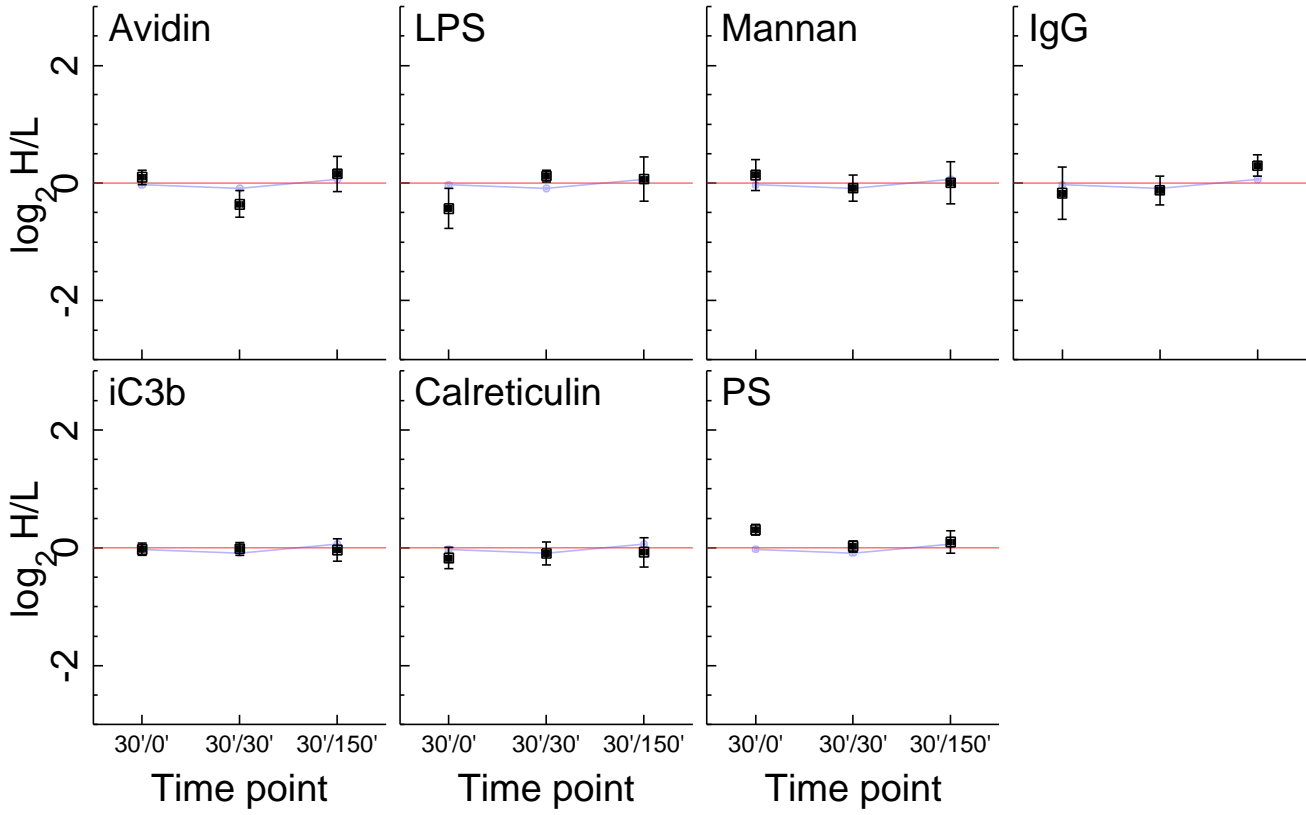

mcl1 (P97287)

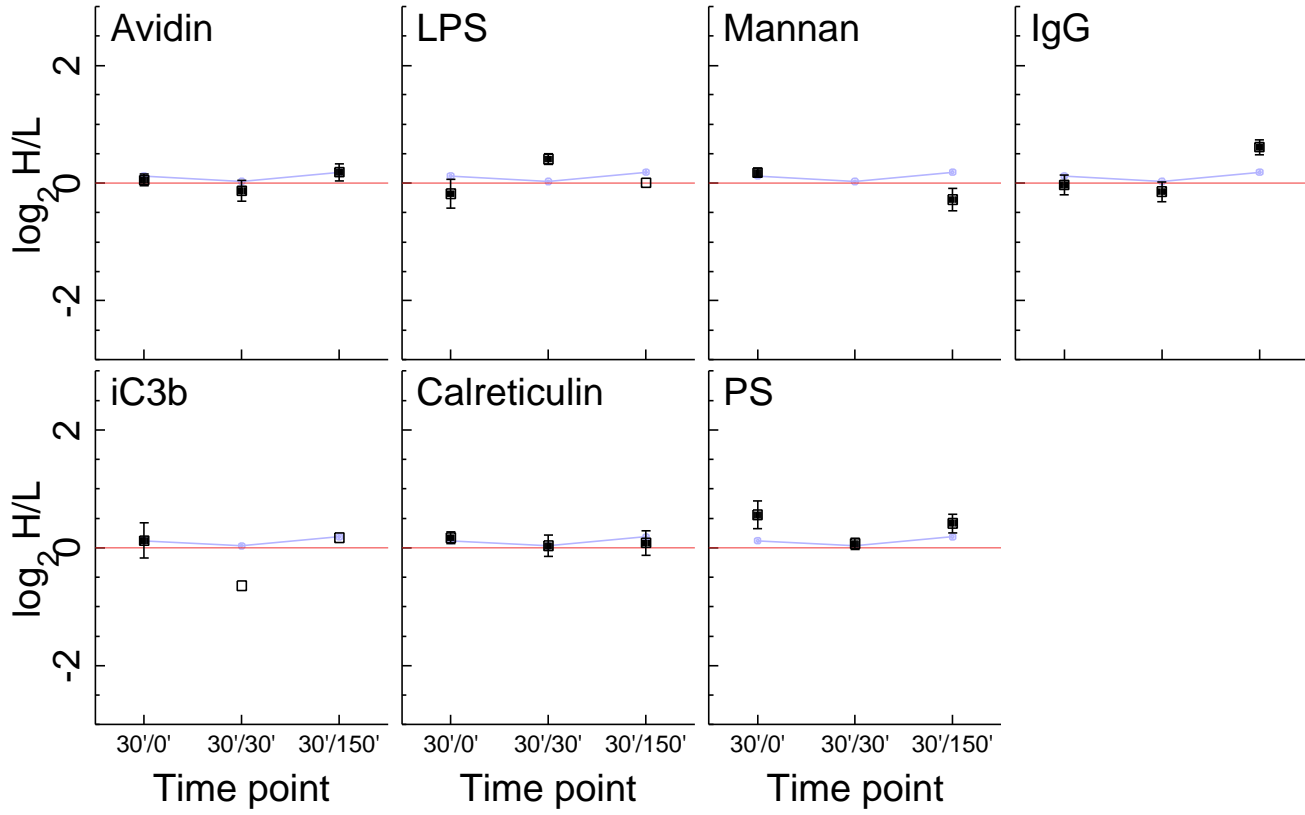



mcoln1 (Q99J21)

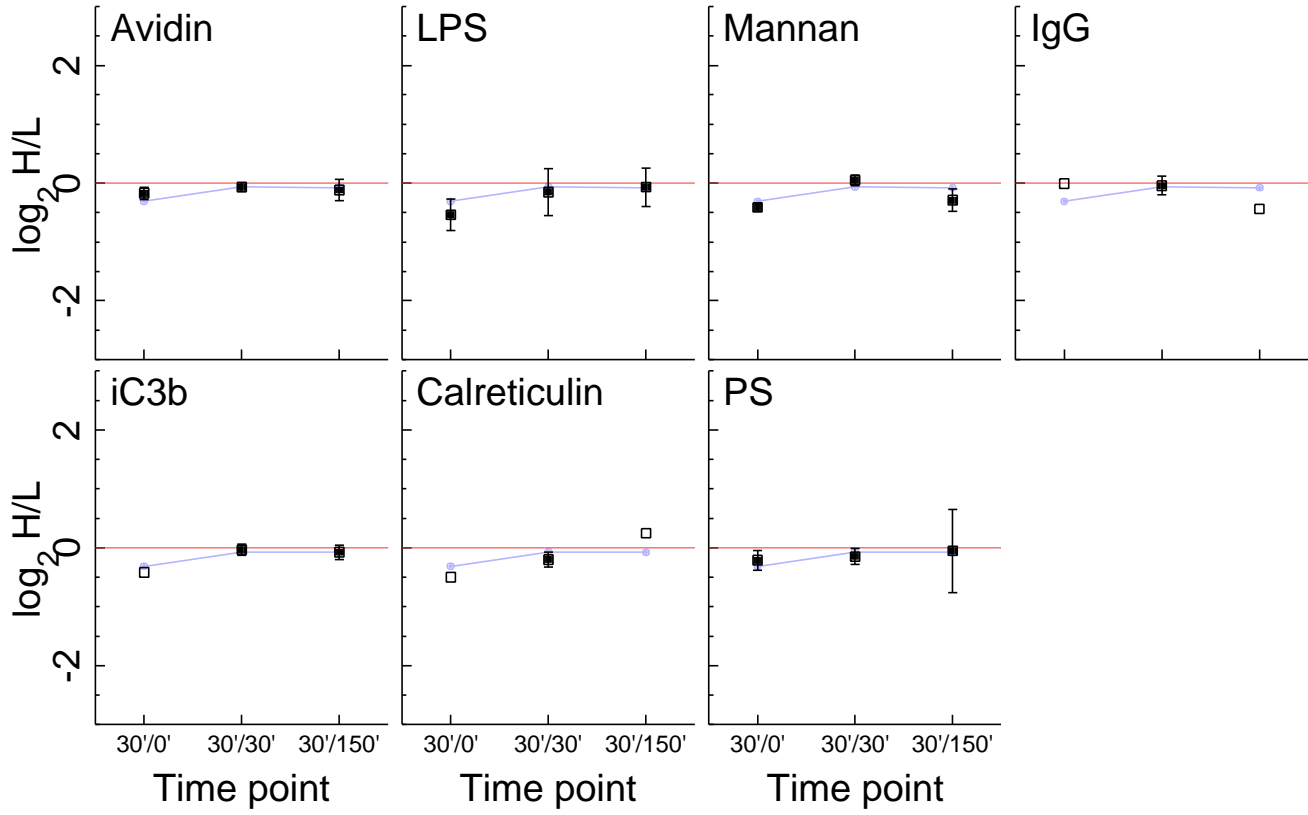

### mcoln2 (Q8K595)

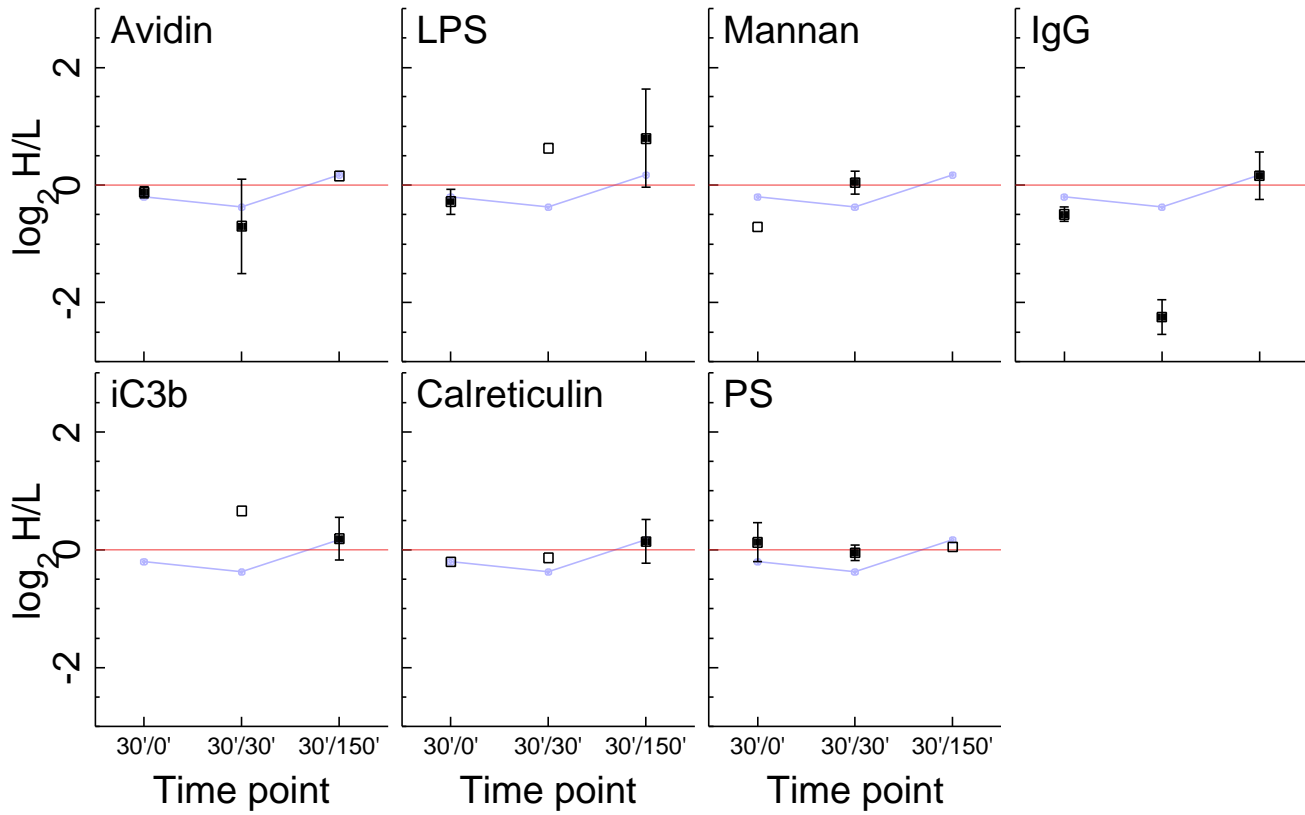

### mdh1 (P14152)

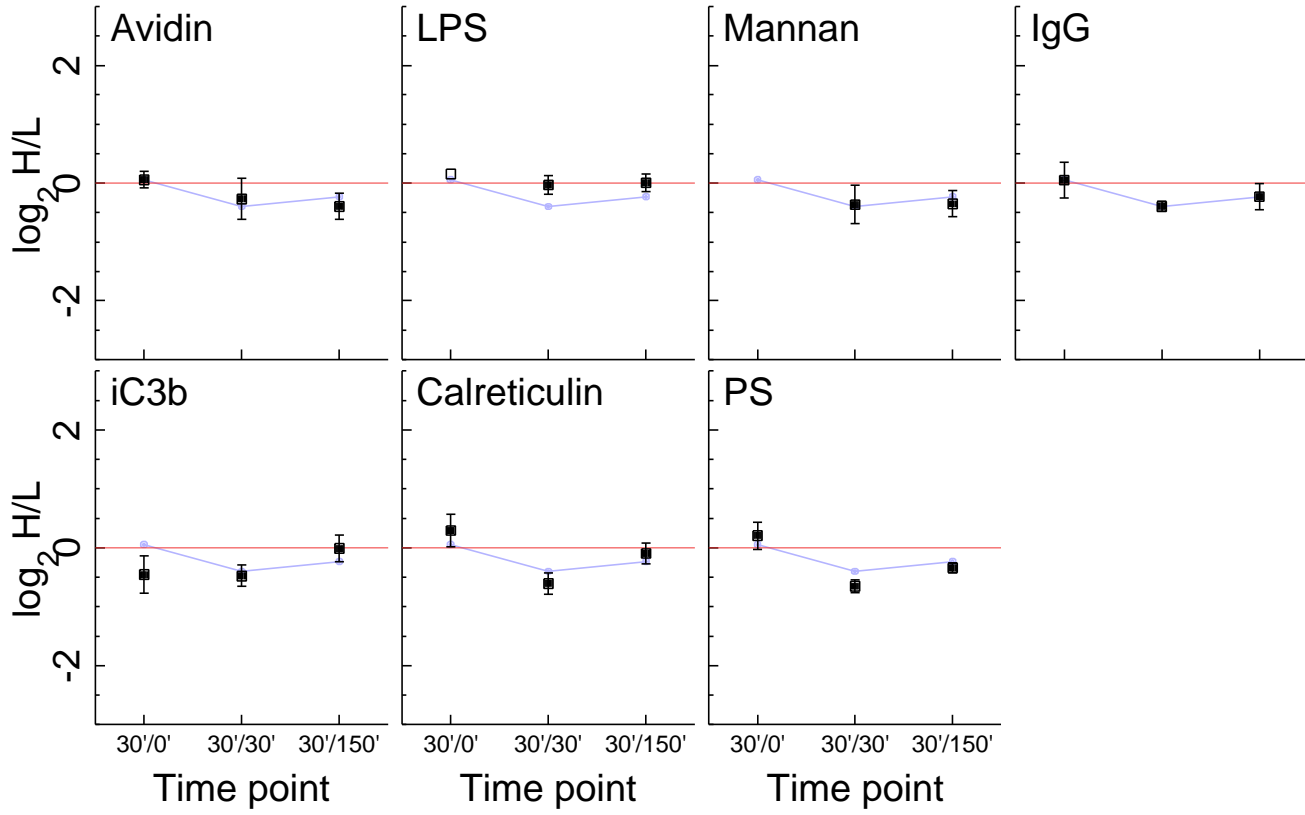

mdh2 (P08249)

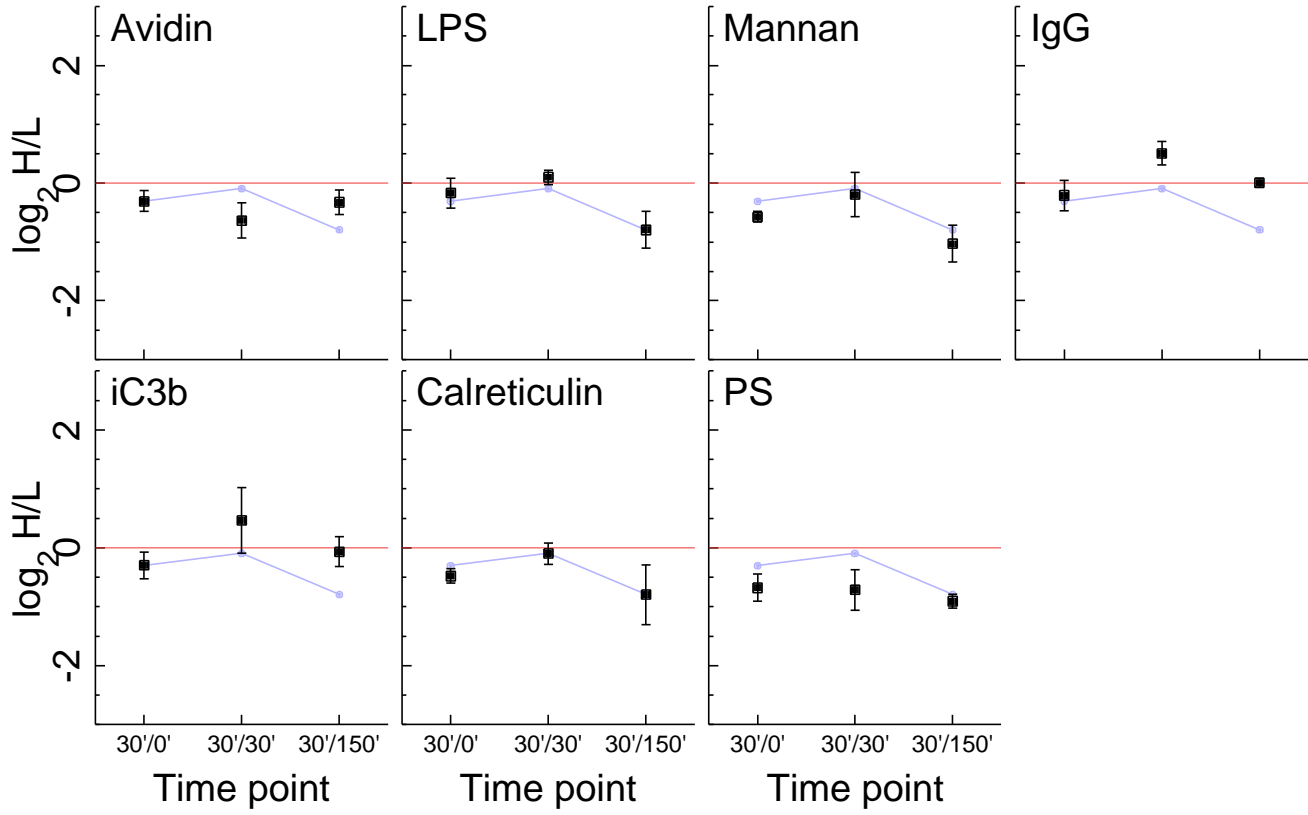

me2 (Q99KE1)

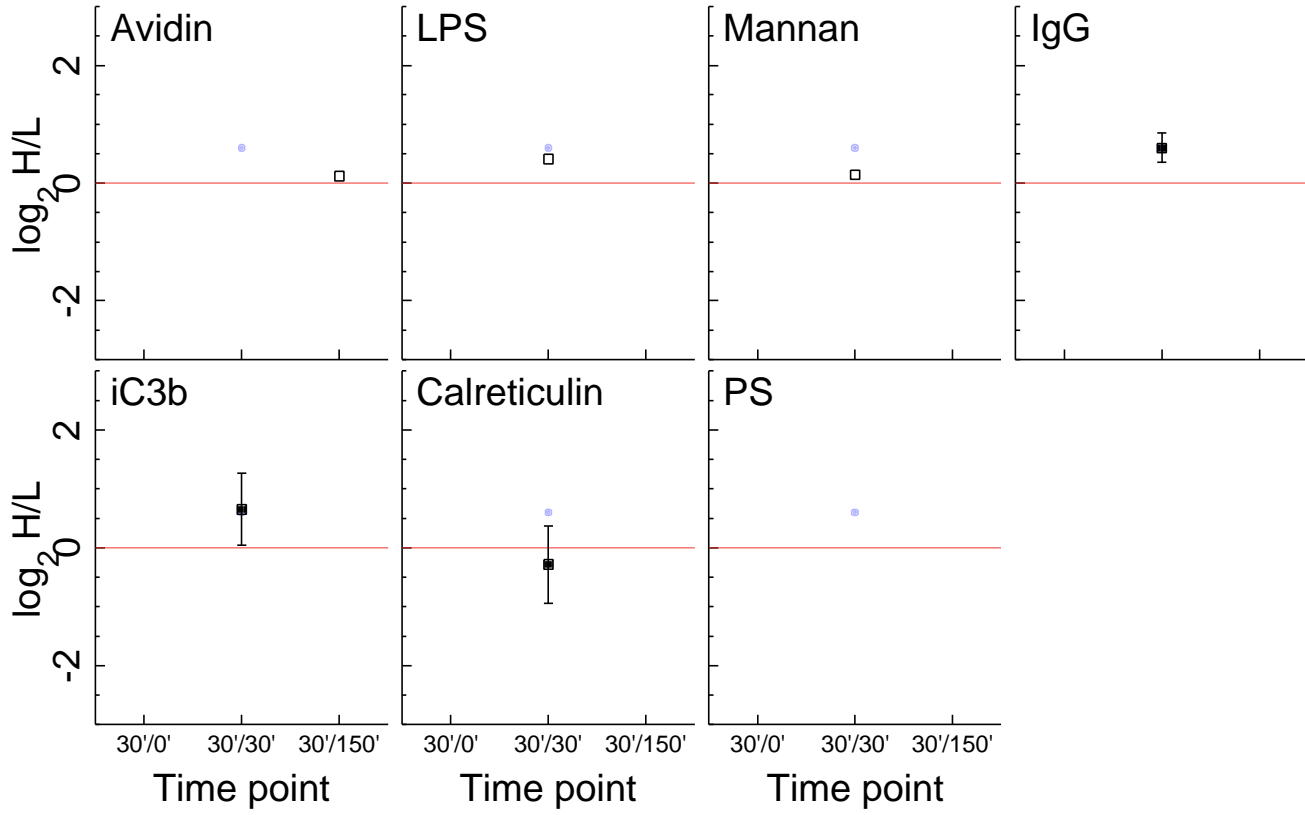

mef2bnb (Q9D6Y4)

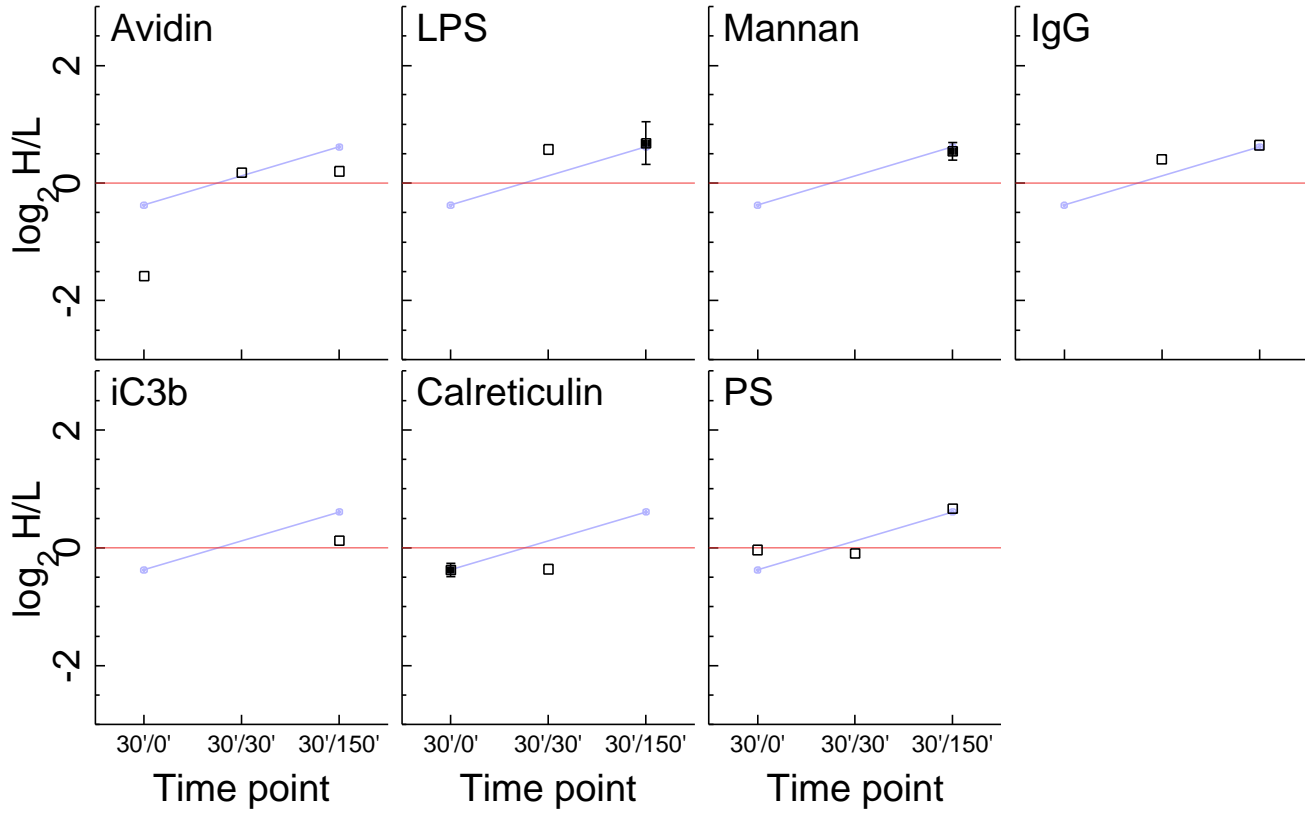

mesdc2 (Q9ERE7)

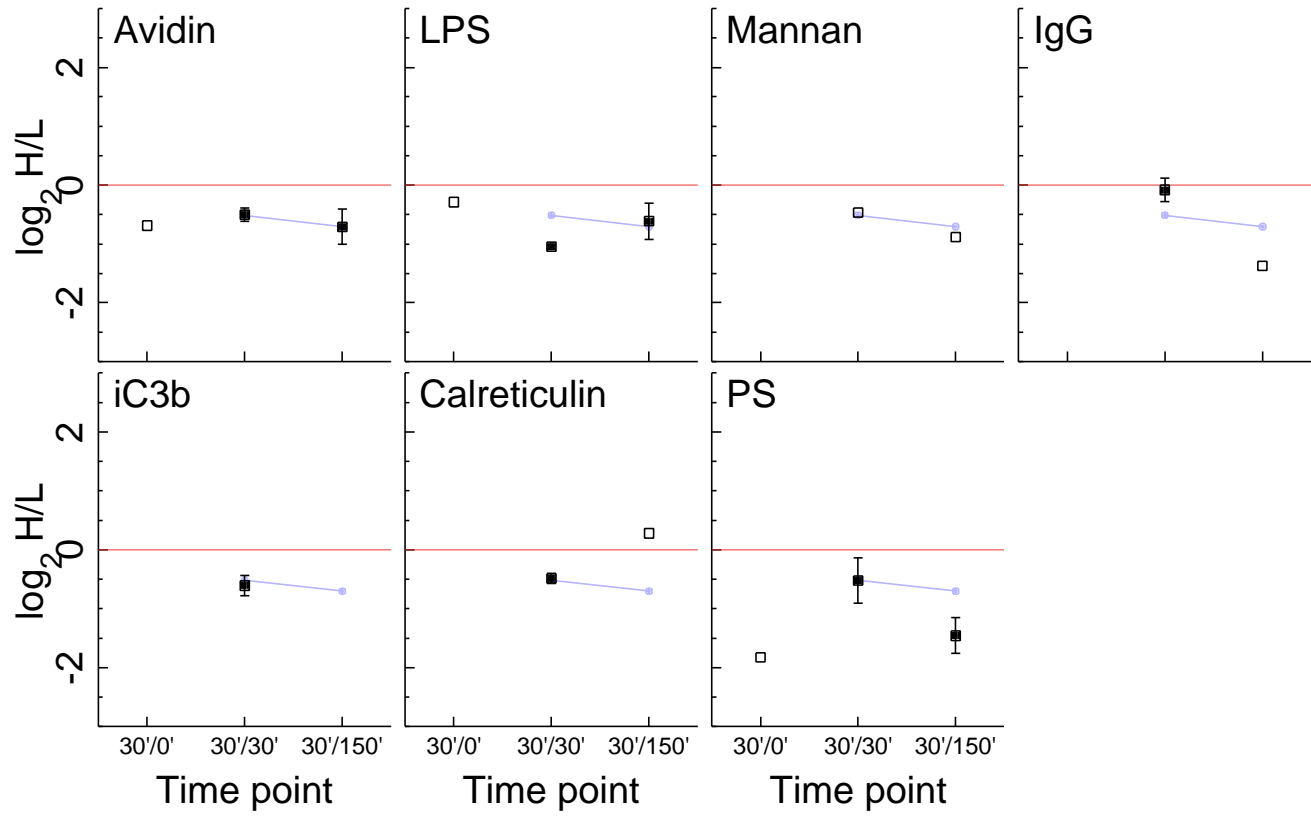

mettl3 (Q8C3P7)

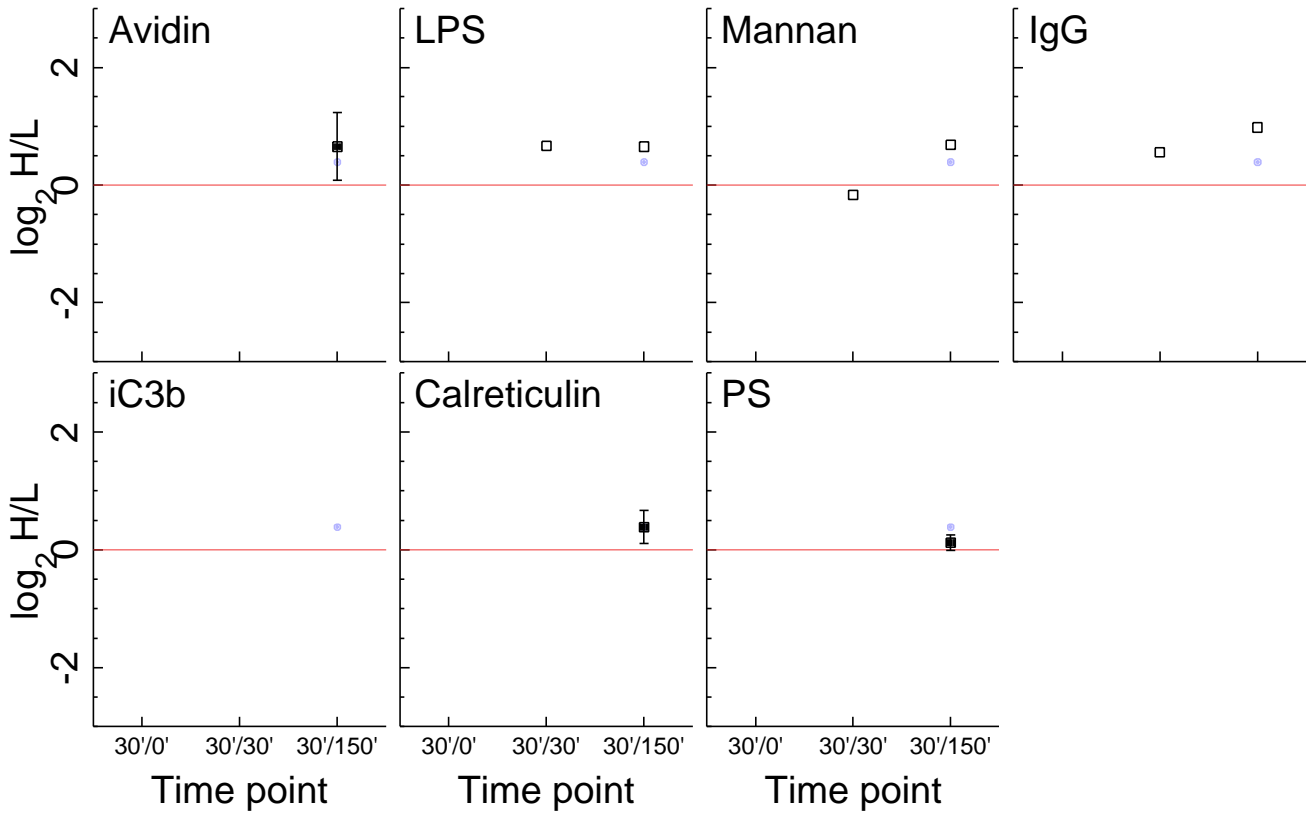



### mettl7a1 (Q8C6B0)

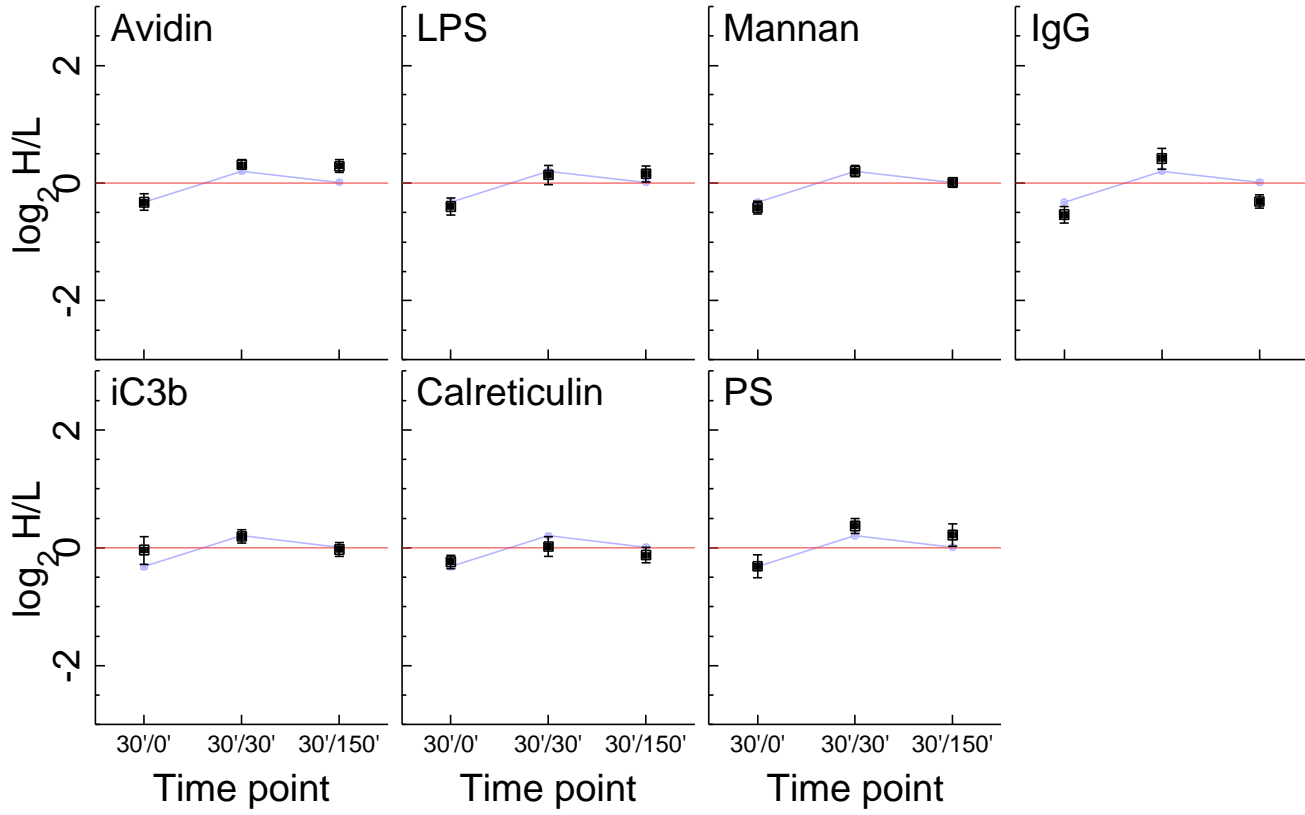

### mfge8 (P21956)

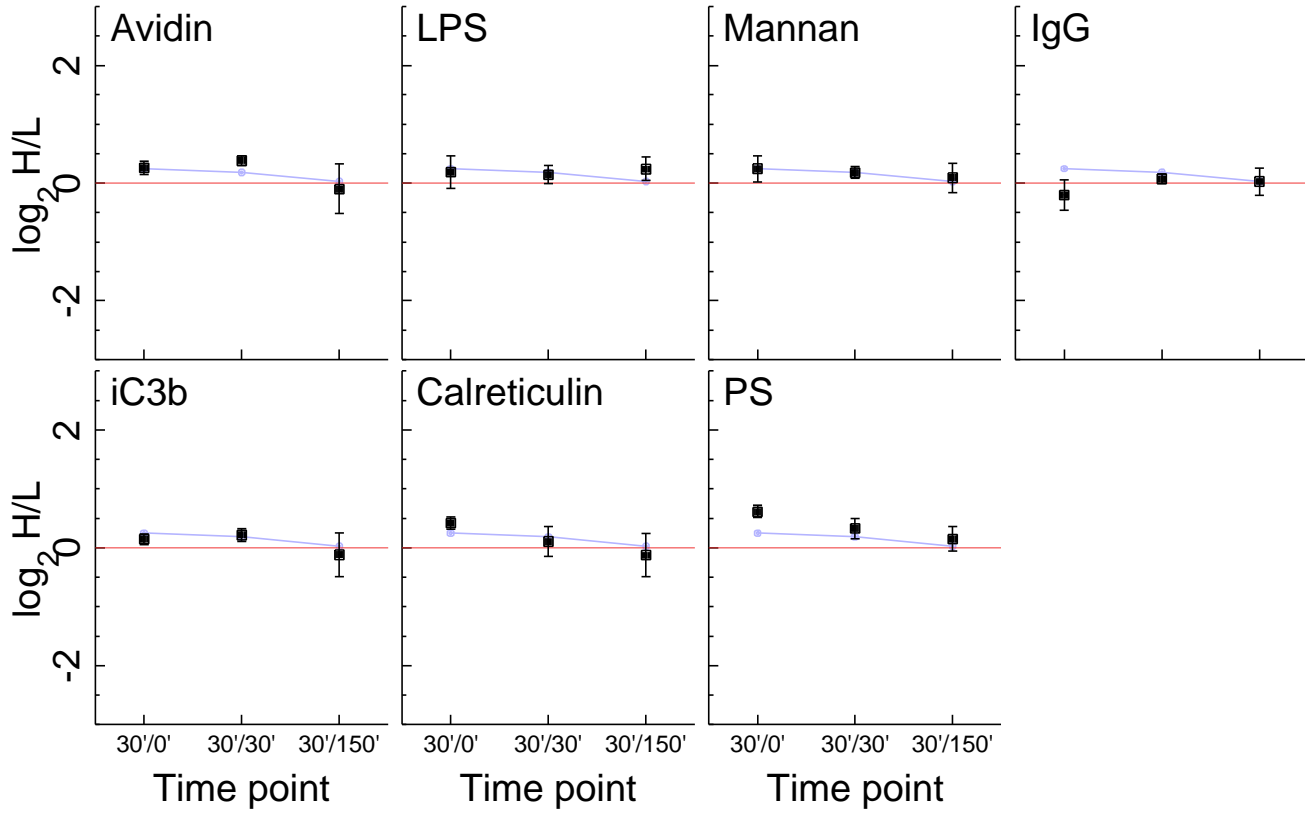

### mfsd12 (Q3U481)

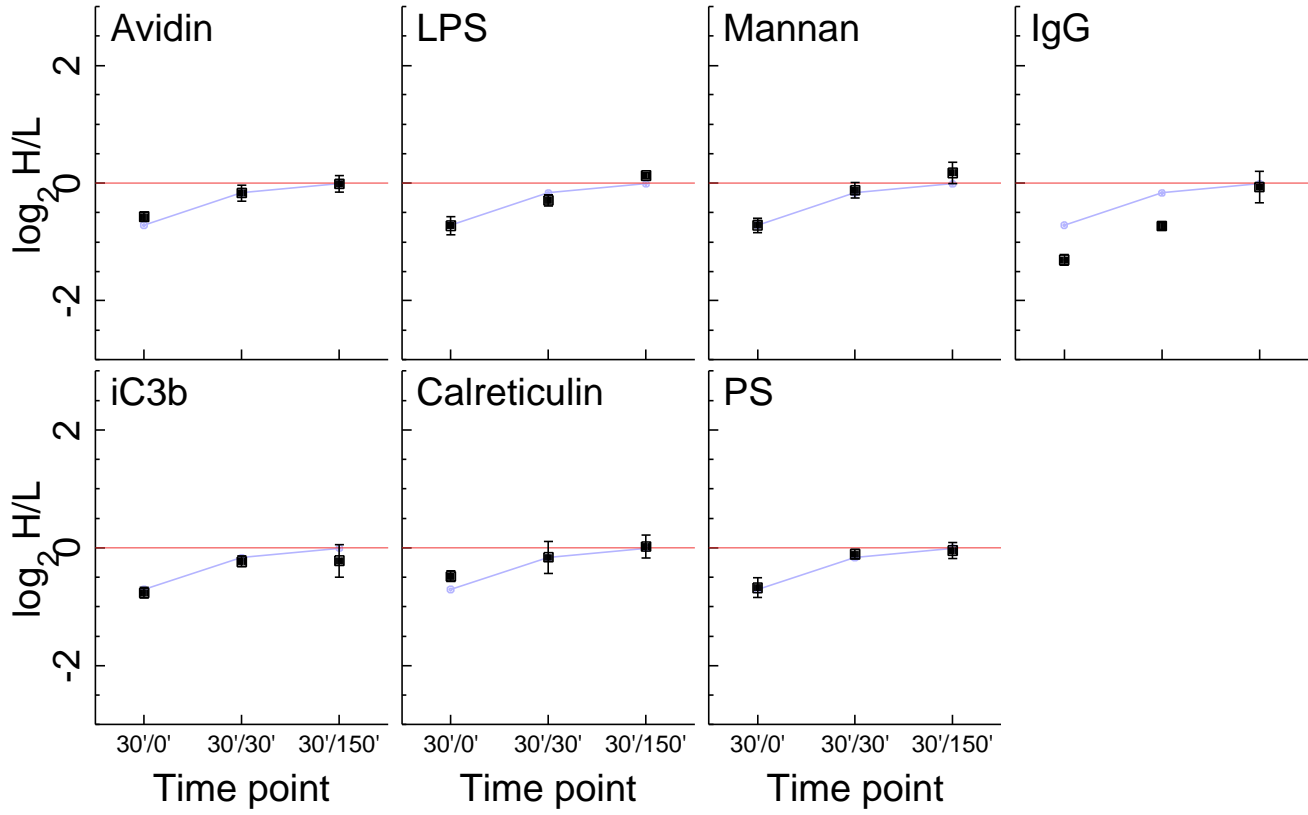

mfSD1 (Q9DC37)

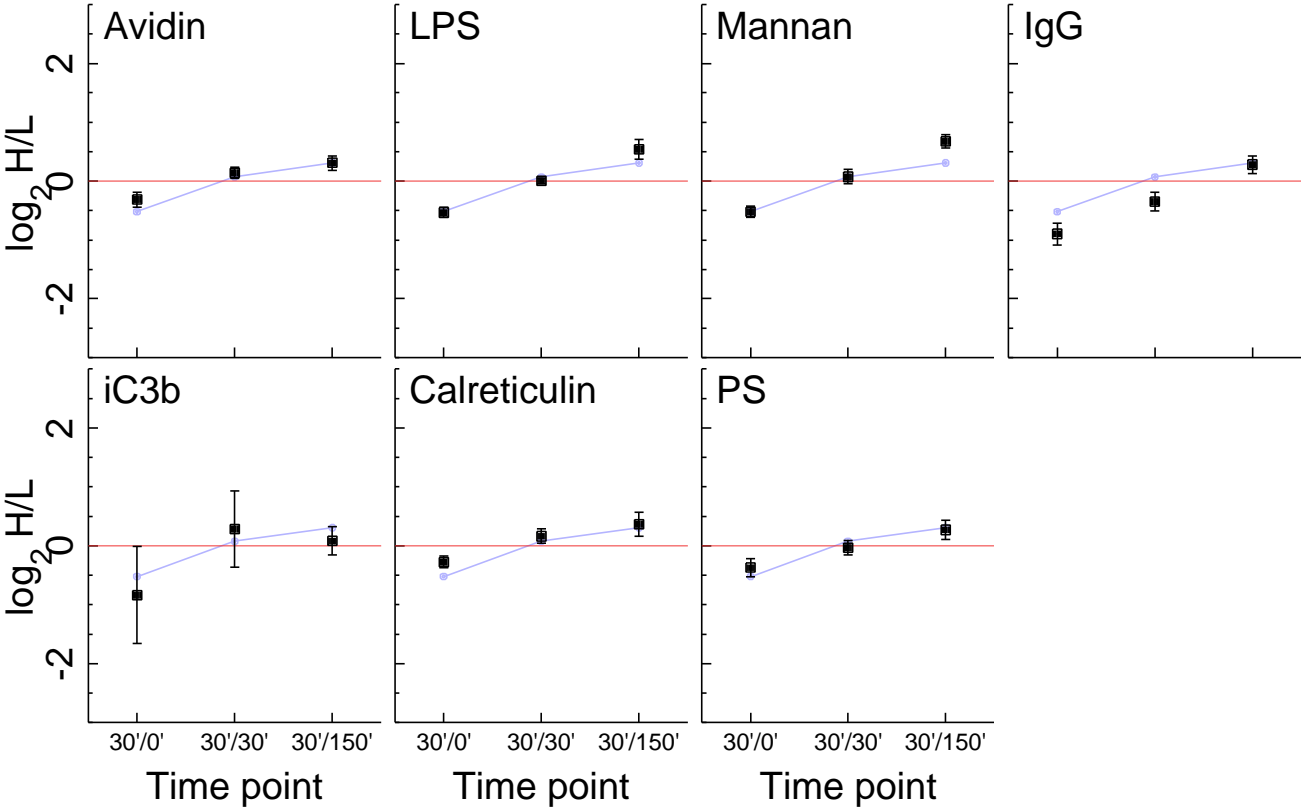

mfSD7 (Q8CE47)

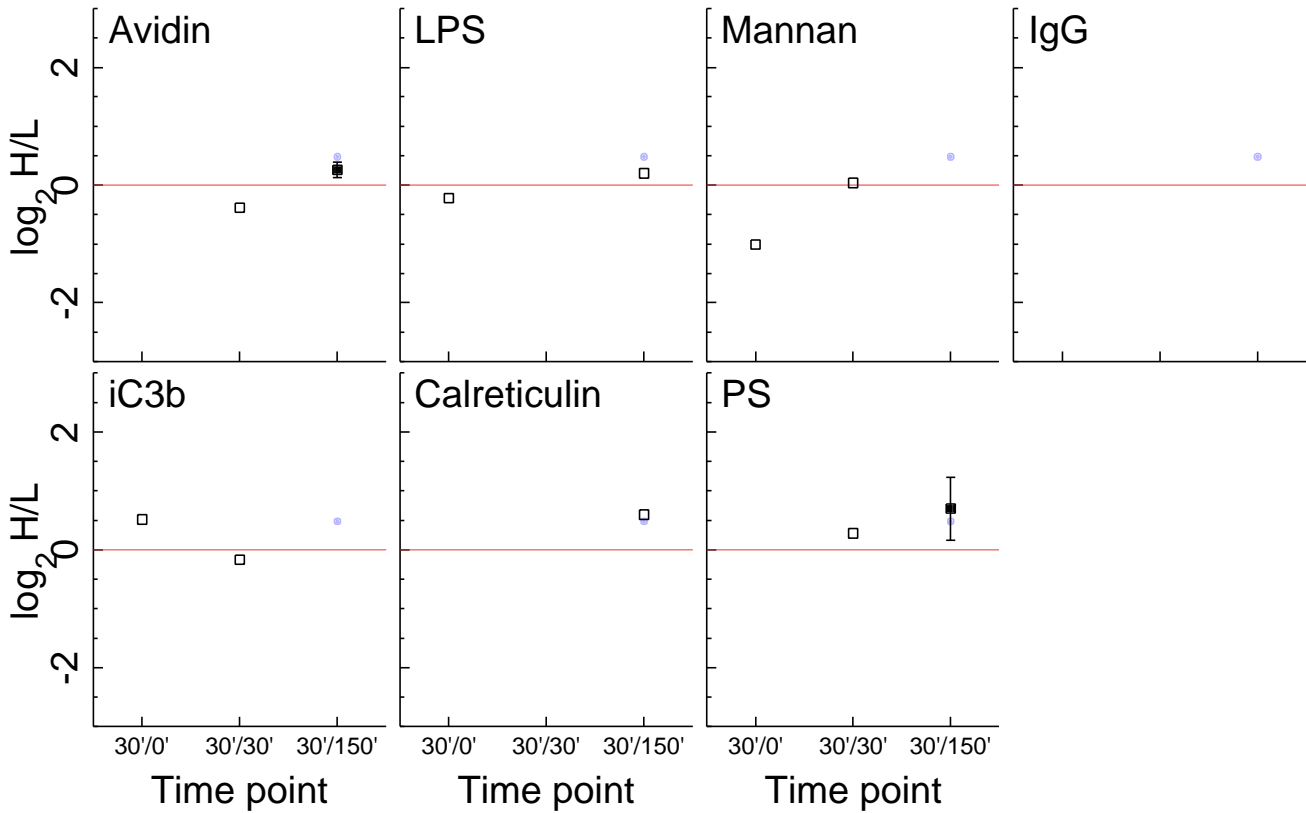

mfSD8 (Q8BH31)

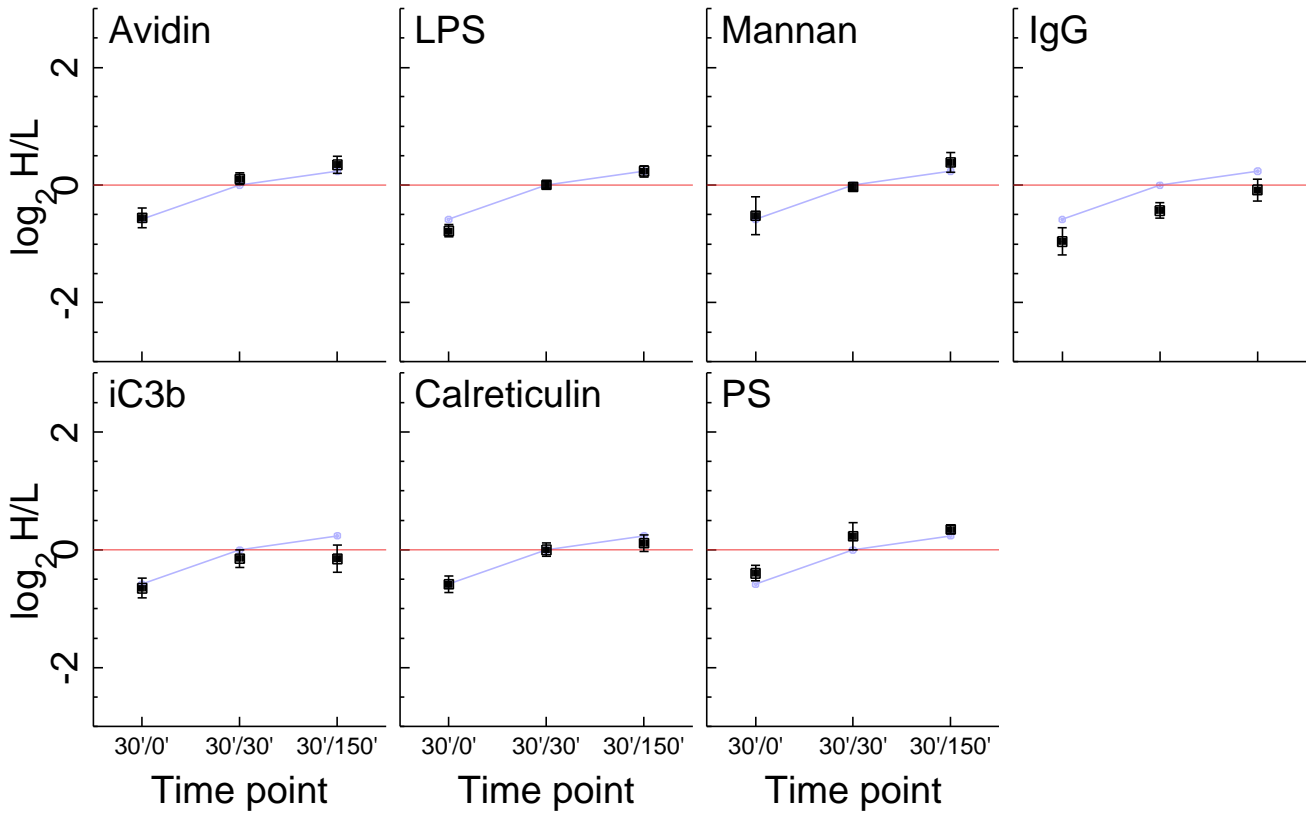

mgat1 (P27808)

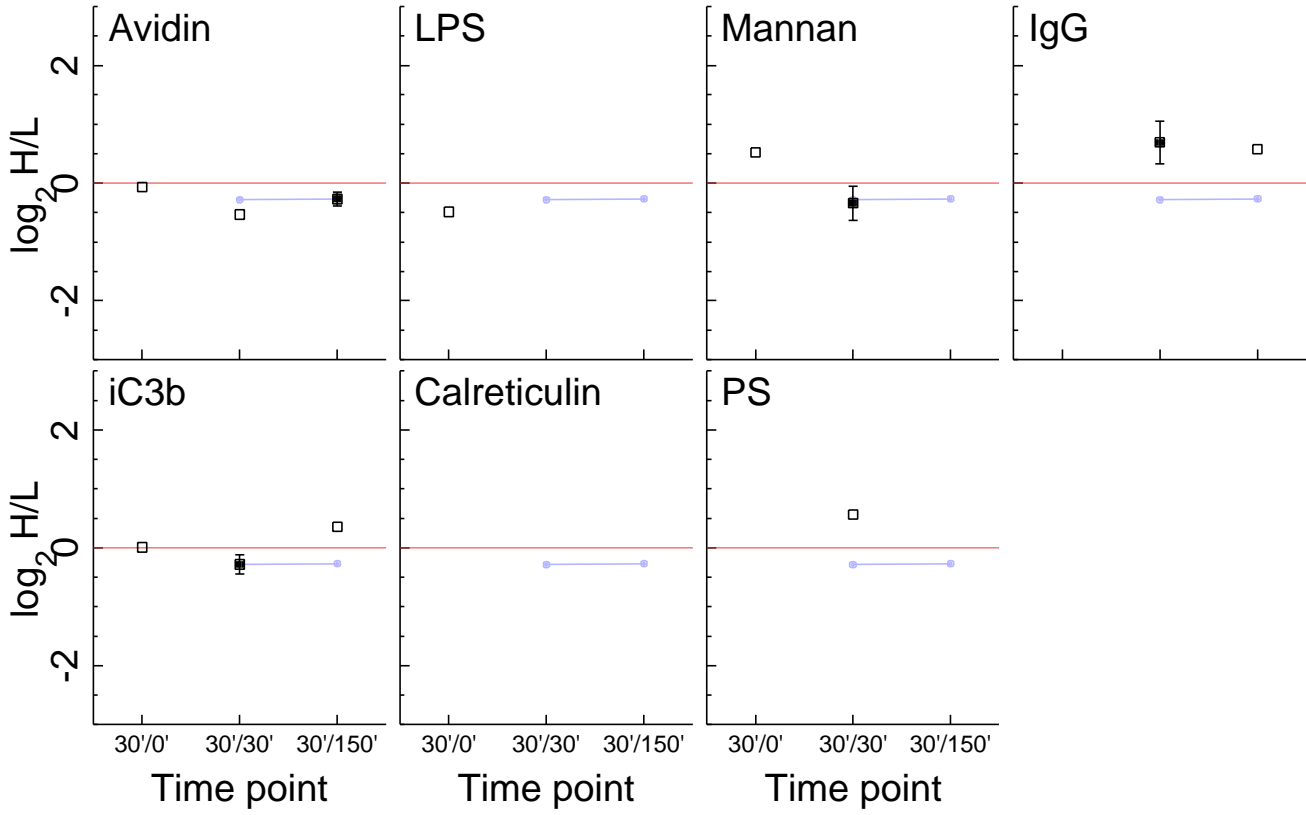

mgp (P19788)

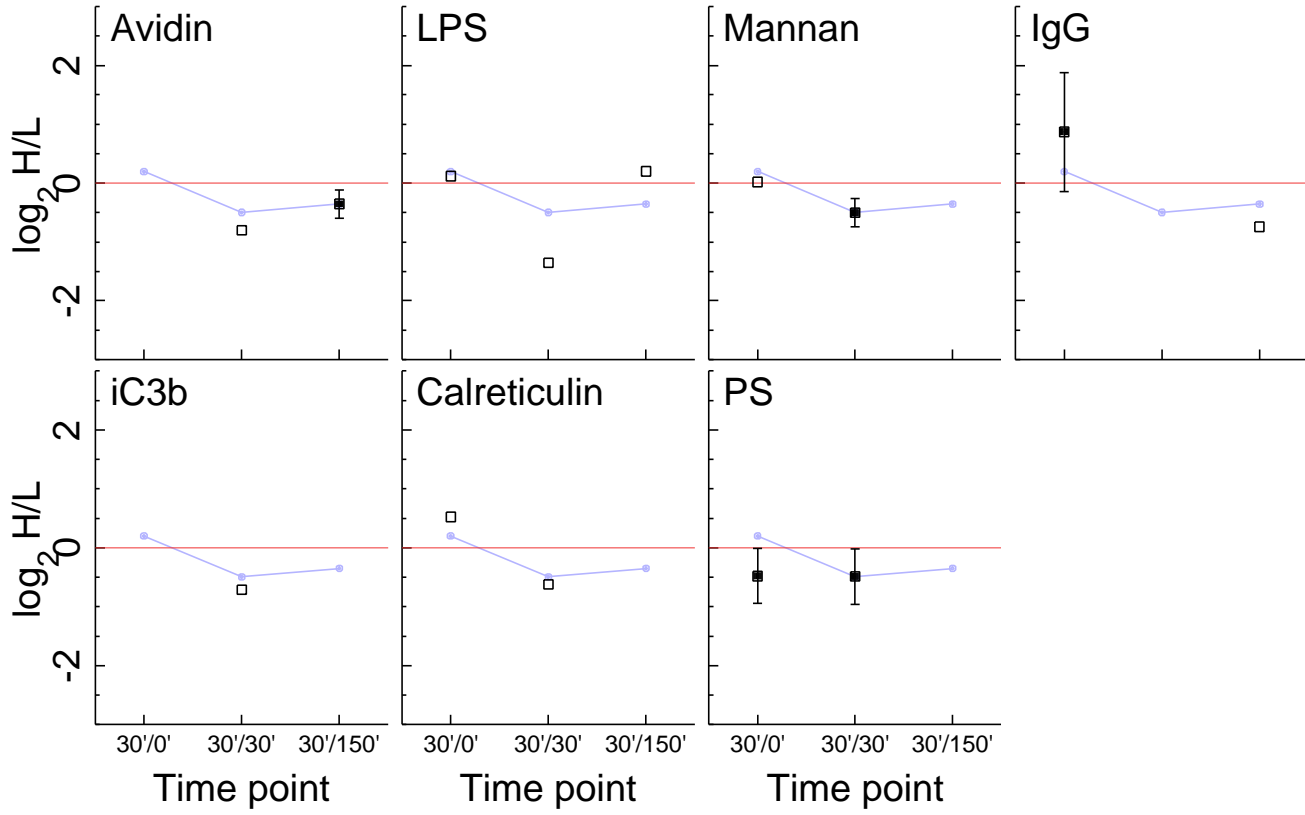



mia3 (Q8BI84)

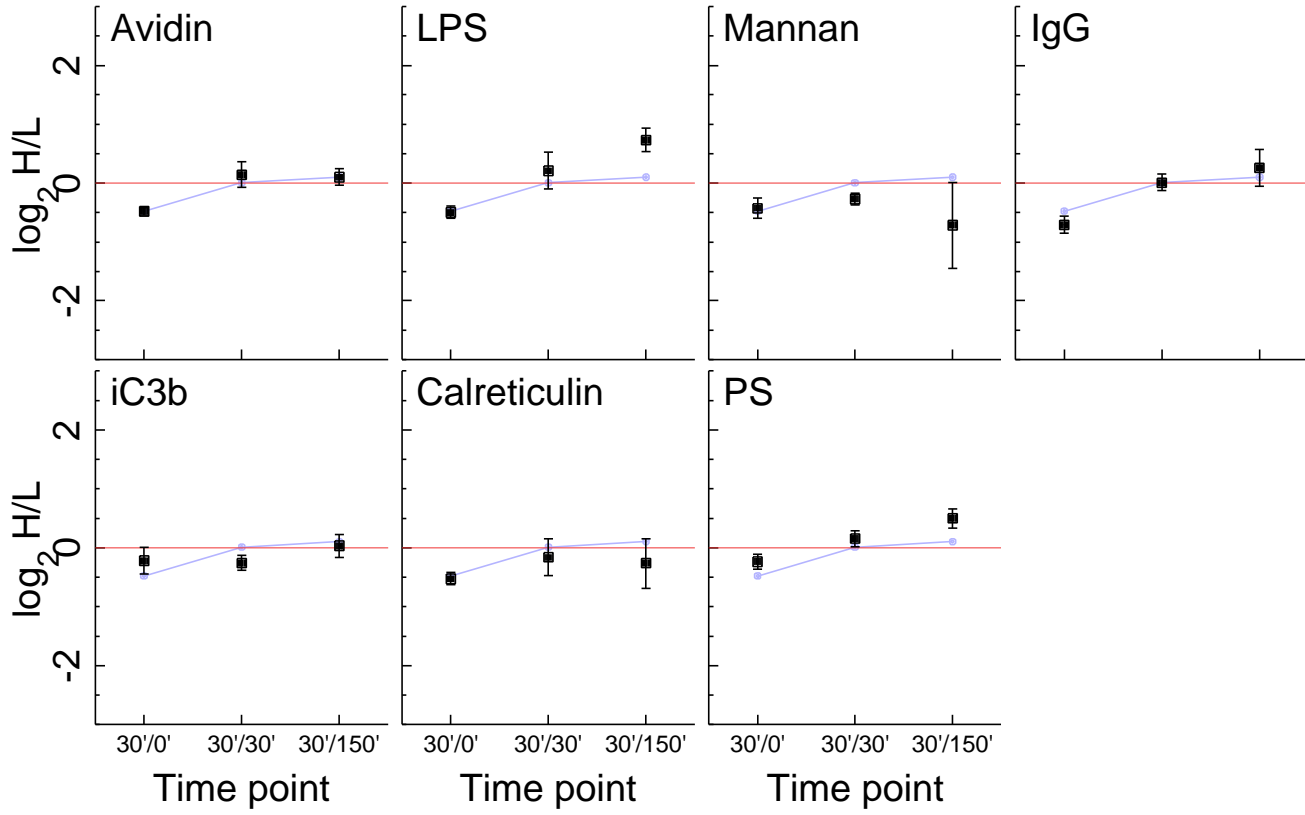

mic1 (Q8VC42)

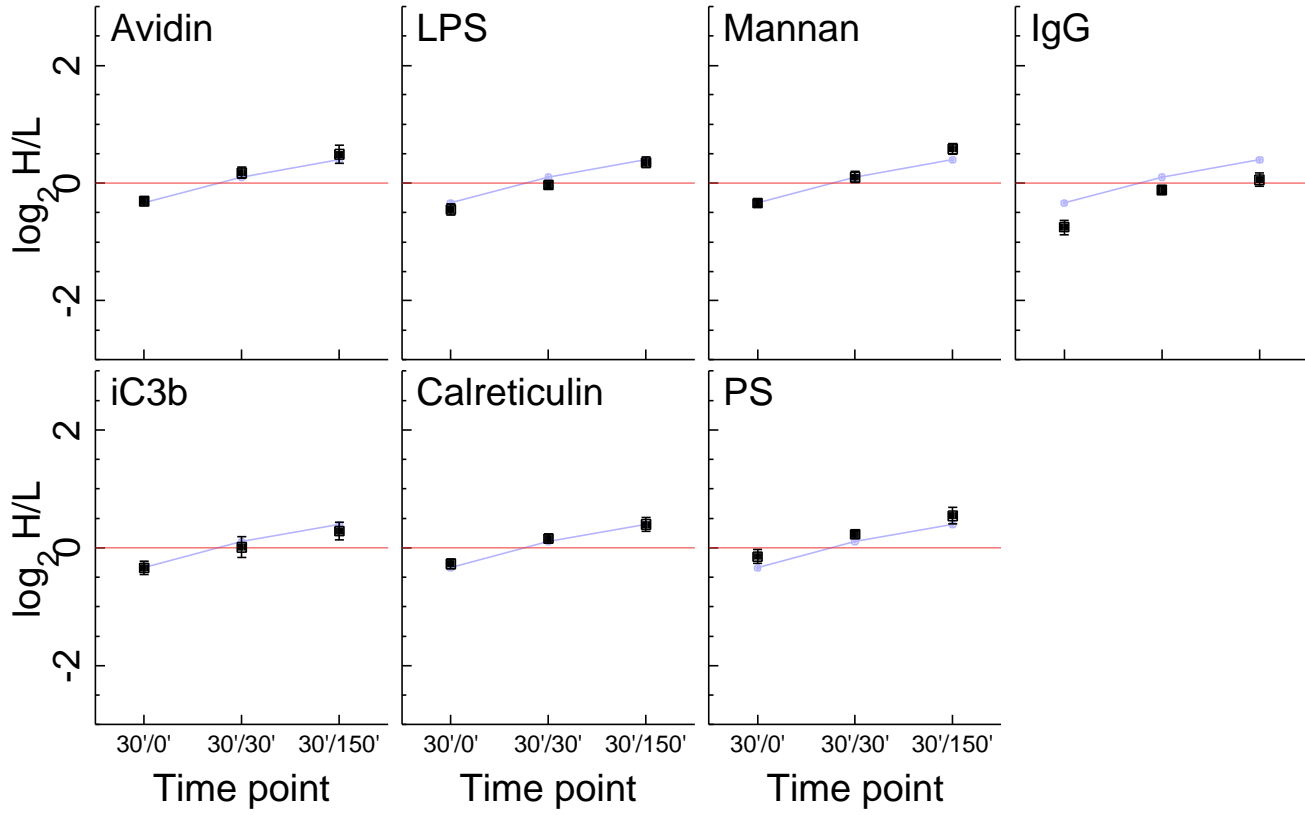

### mir1 (Q3TB92)

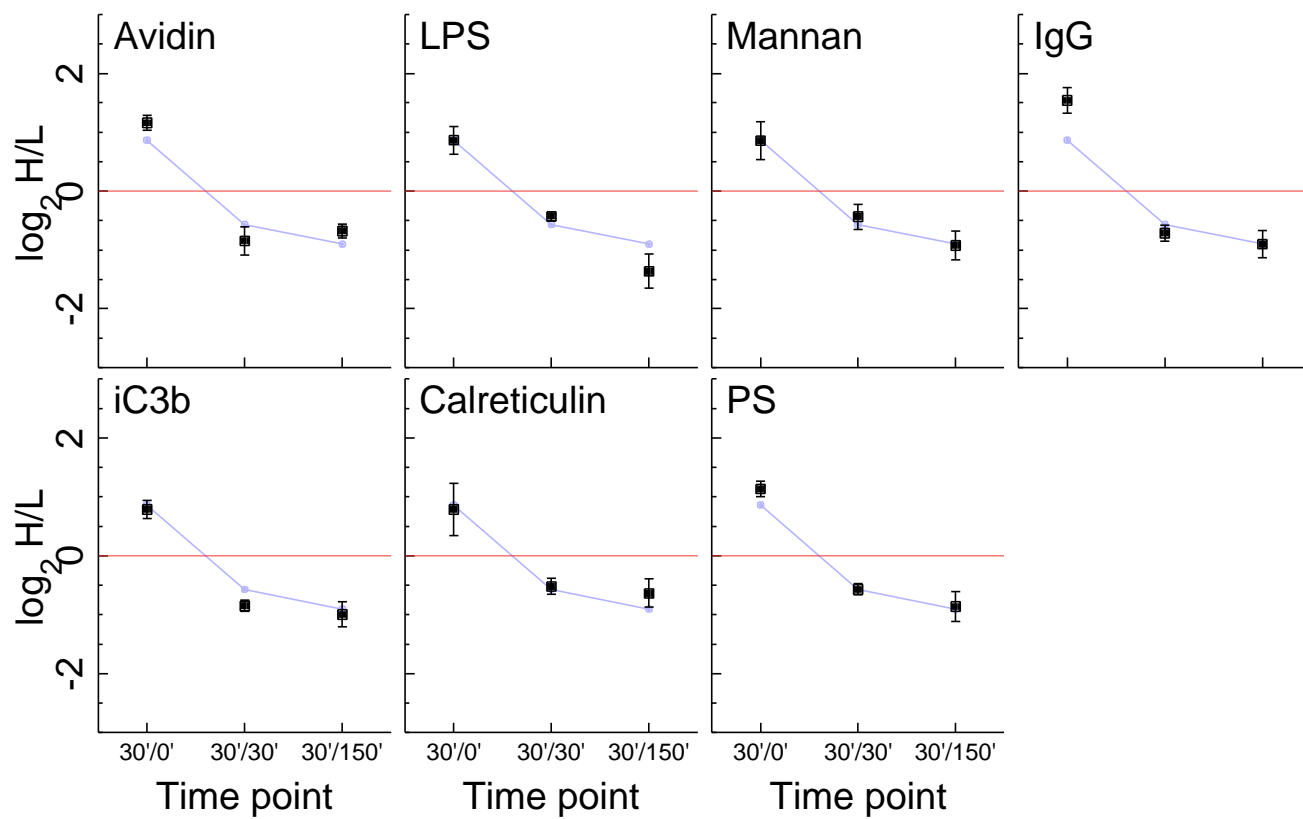

### mitd1 (Q8VDV8)

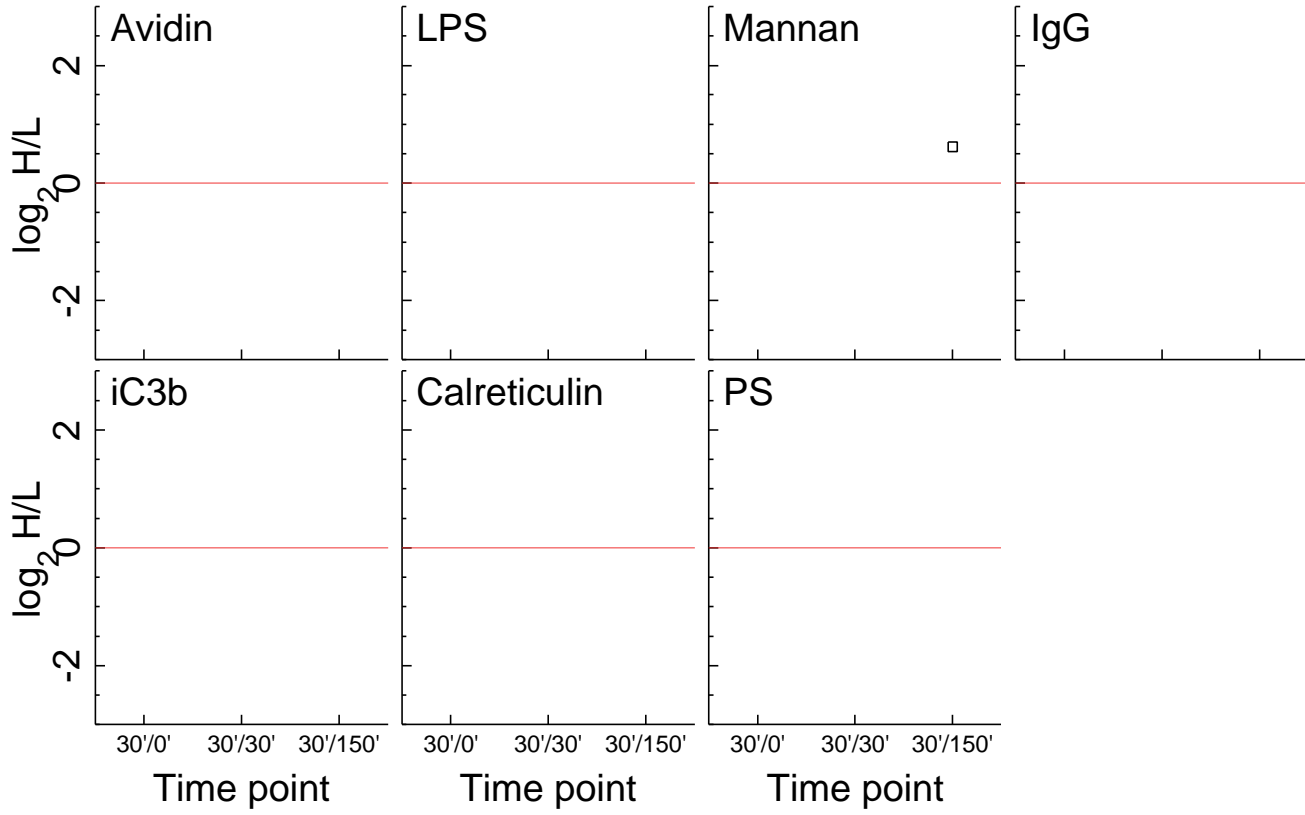

mki67 (E9PVX6)

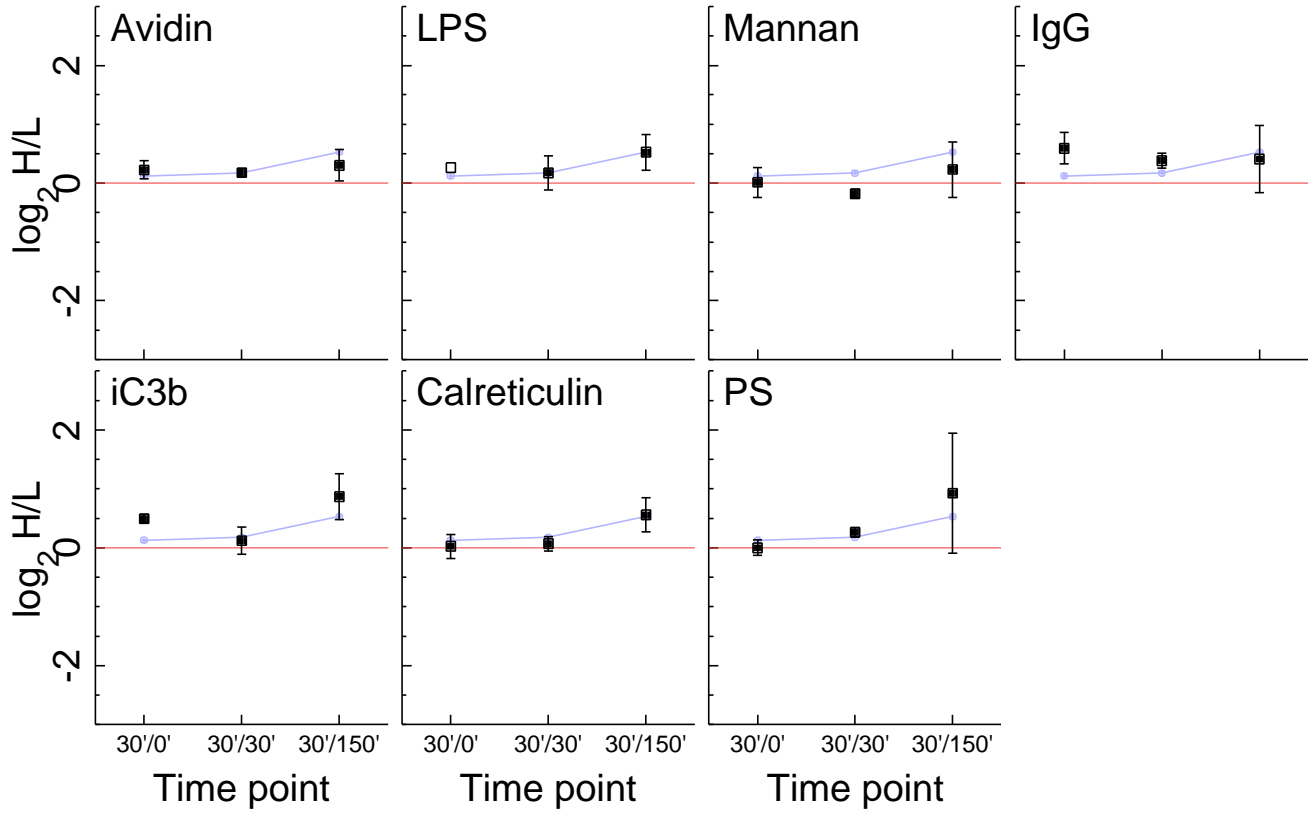

mlec (Q6ZQI3)

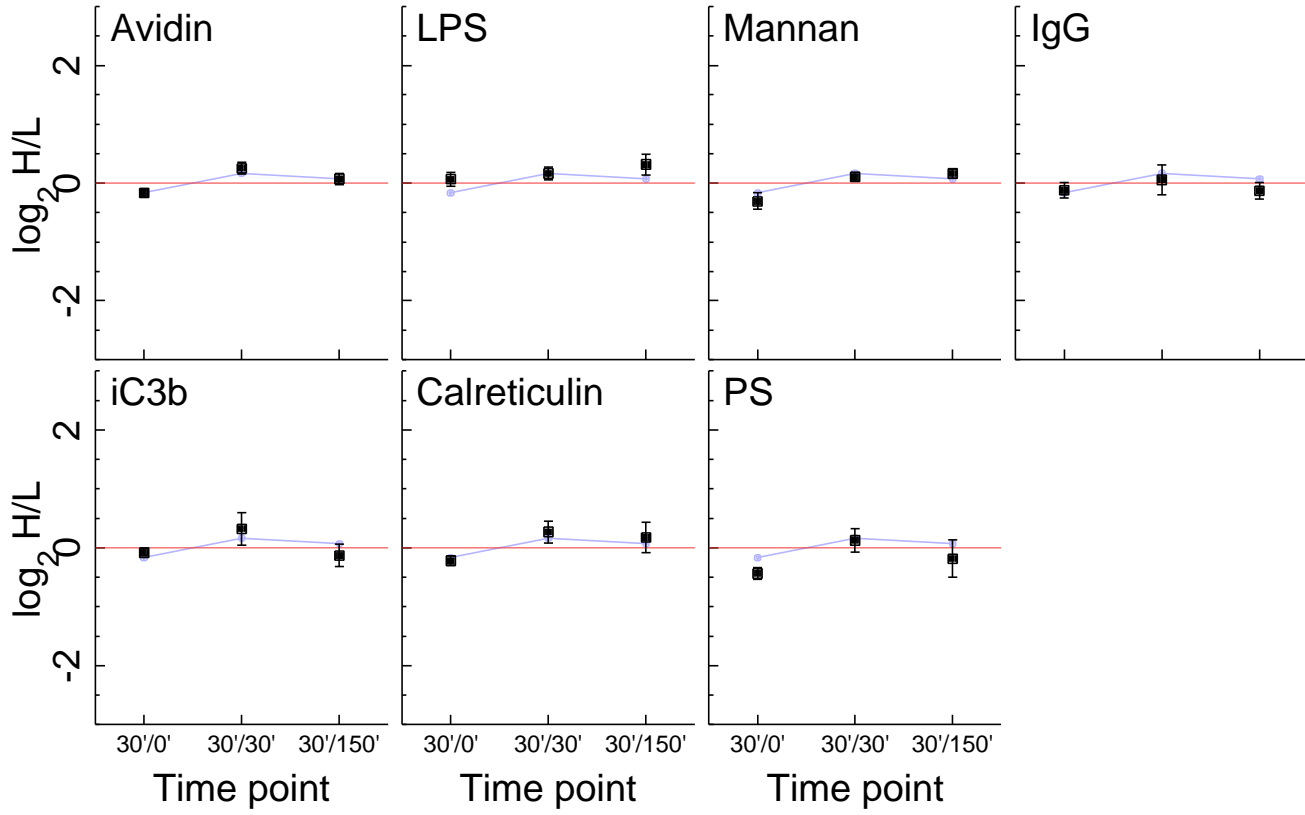

mlst8 (Q9DCJ1)

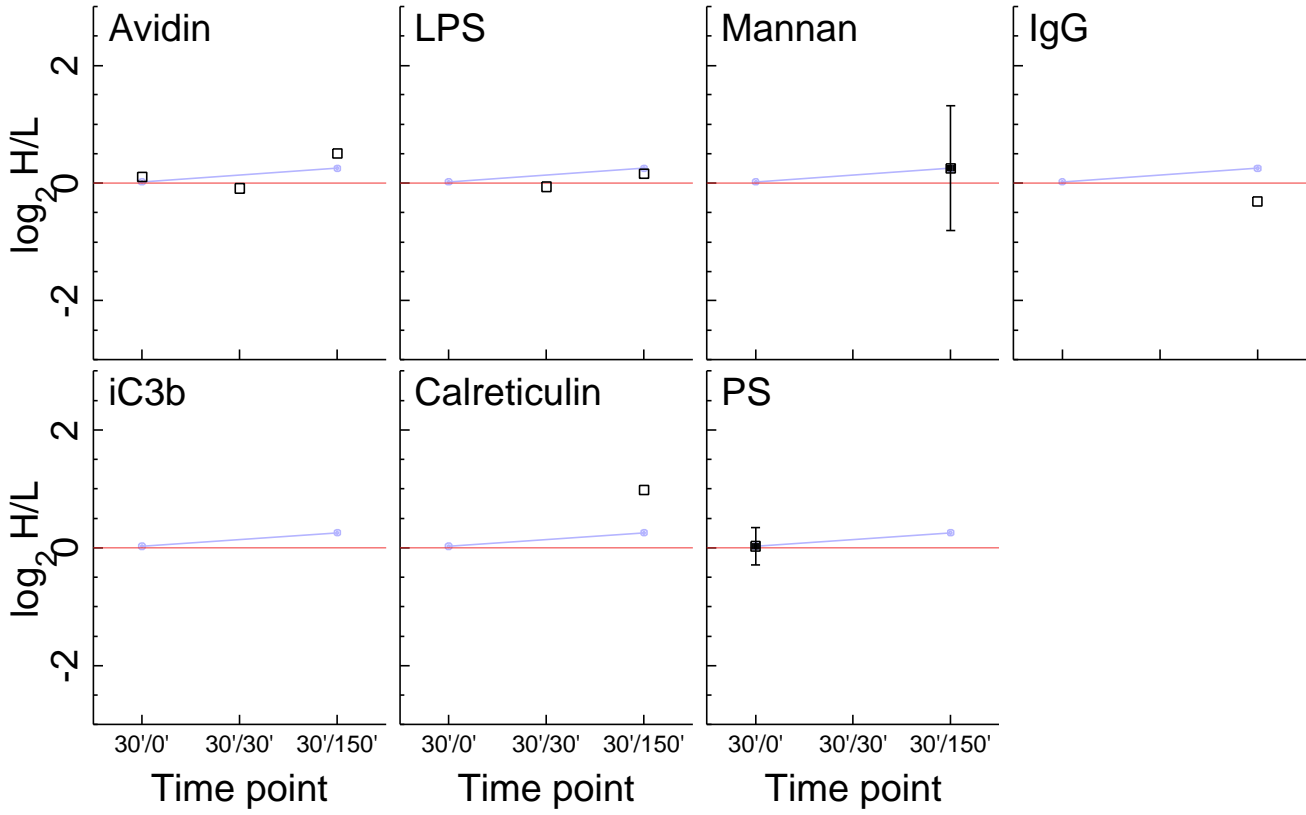

mob1b (Q3UDM0)

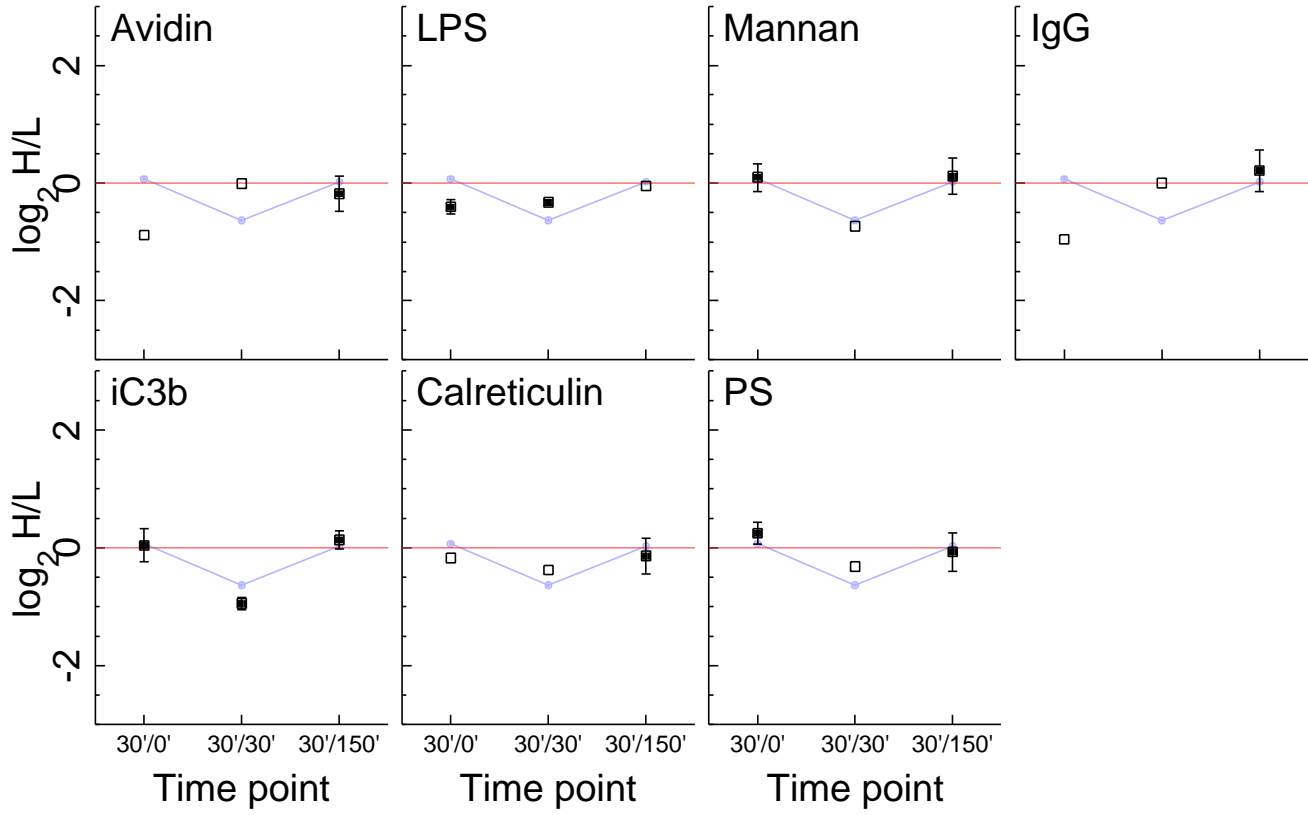



### mob4 (Q6PEB6)

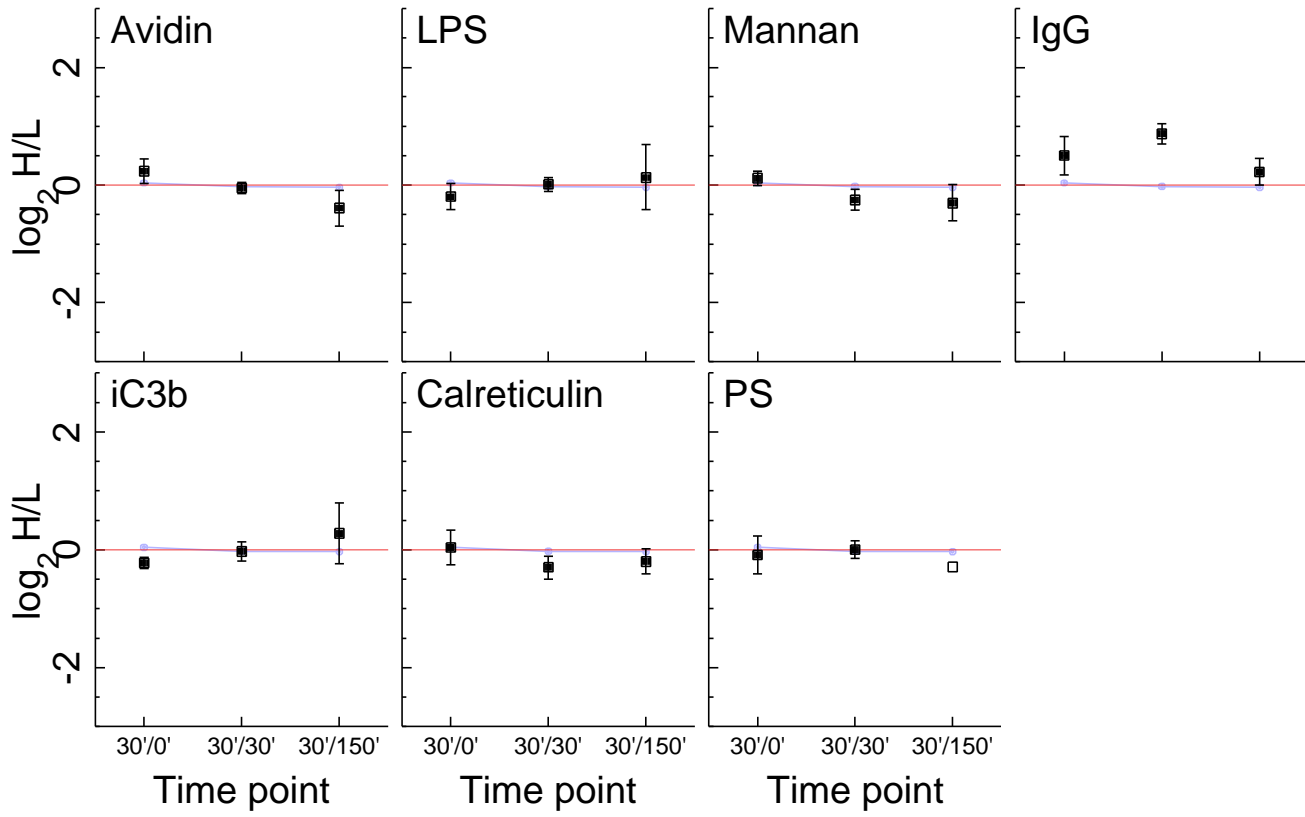

mon1a (Q6PDG8)

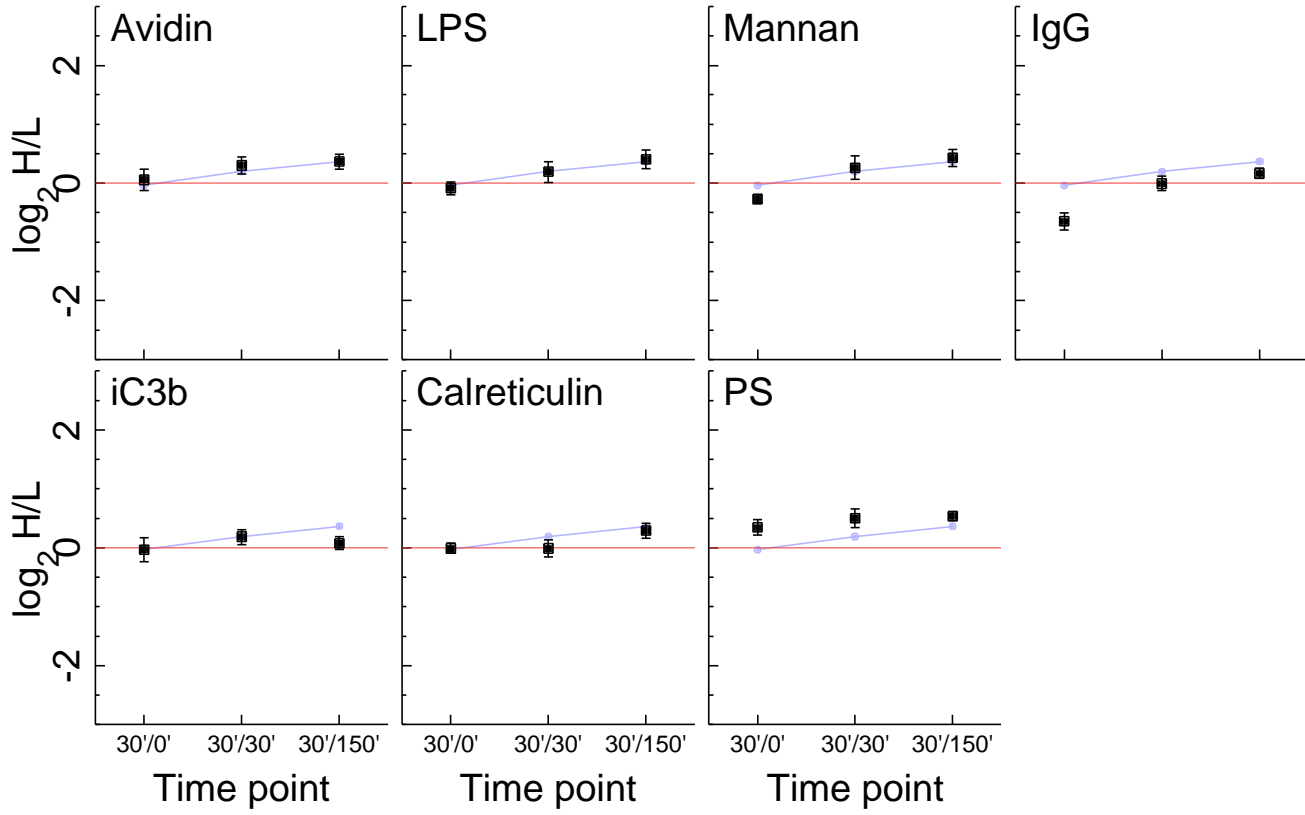

mon1b (Q8BMQ8)

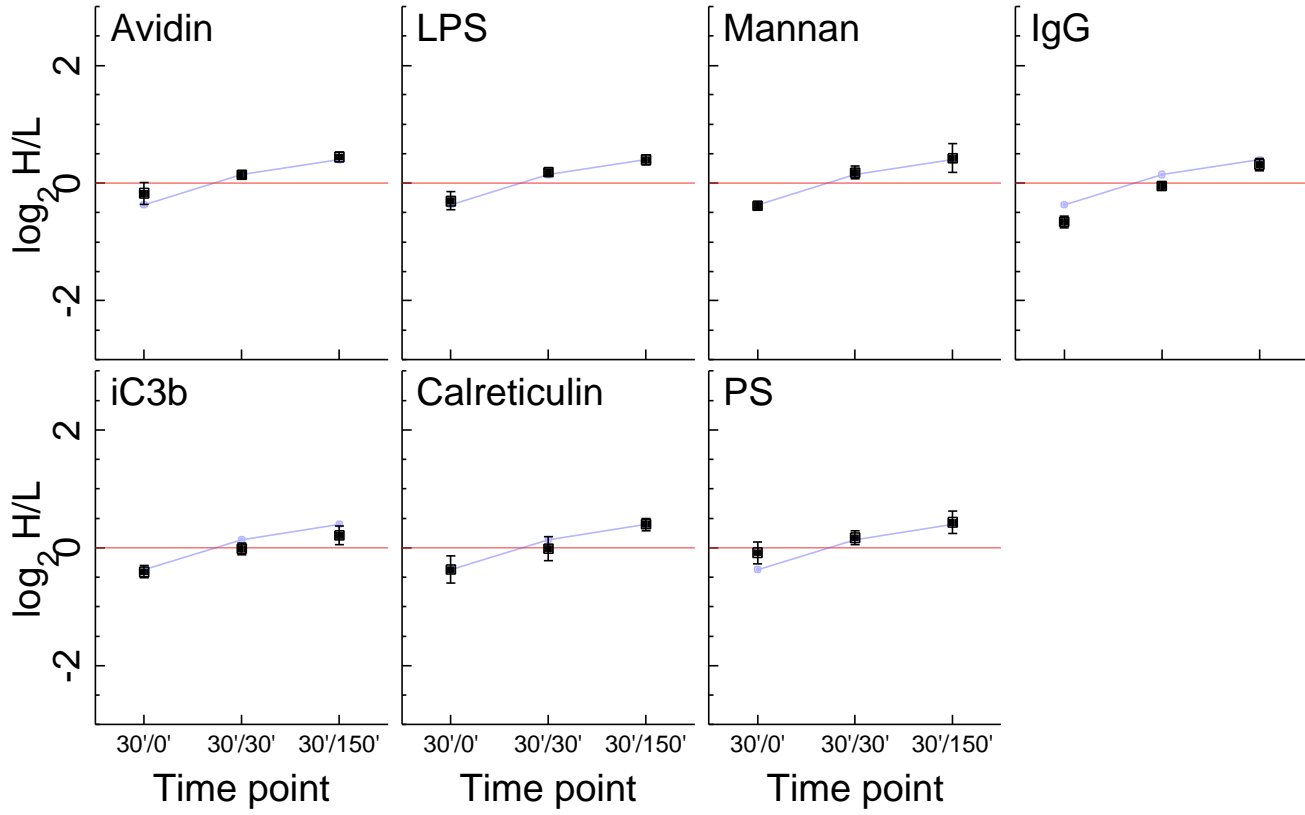

mpdu1 (Q8R0J2)

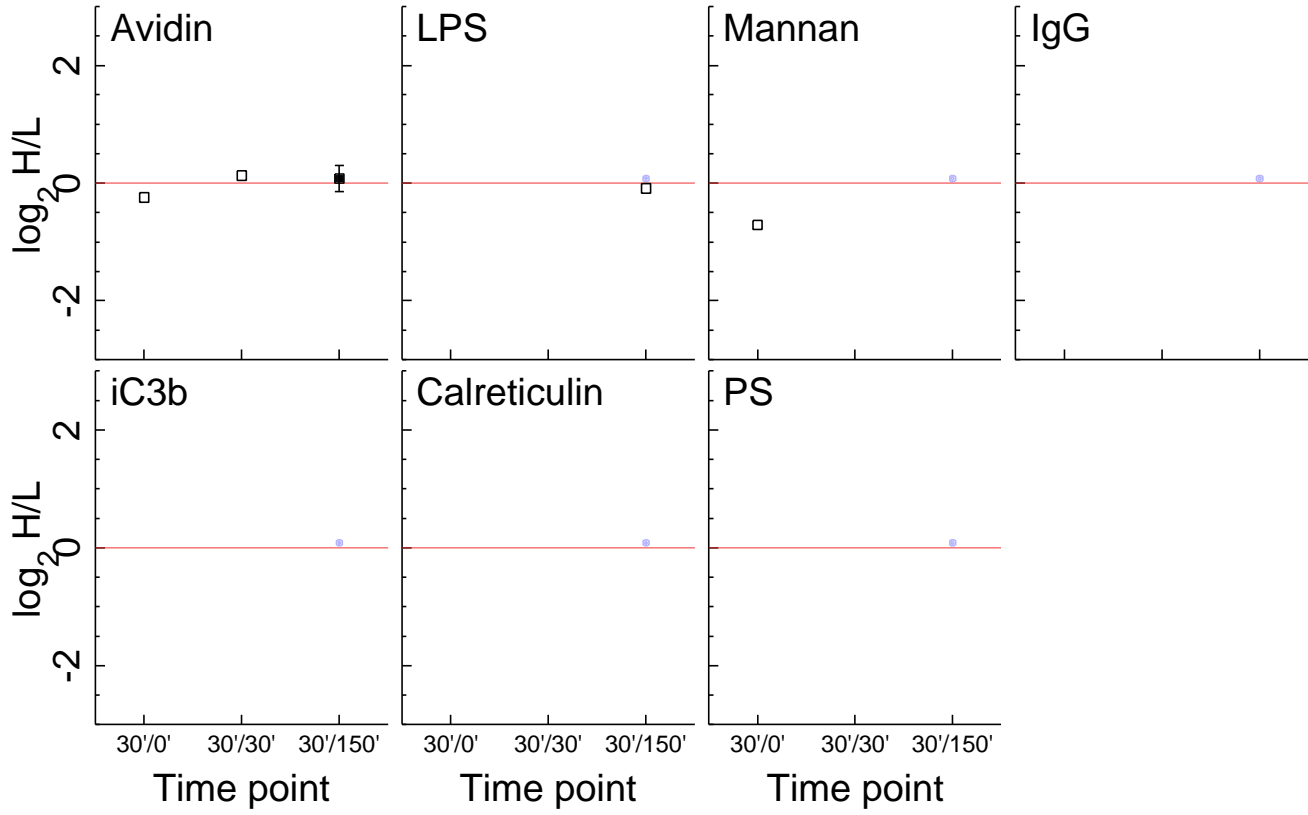

### mpeg1 (E9QN37)

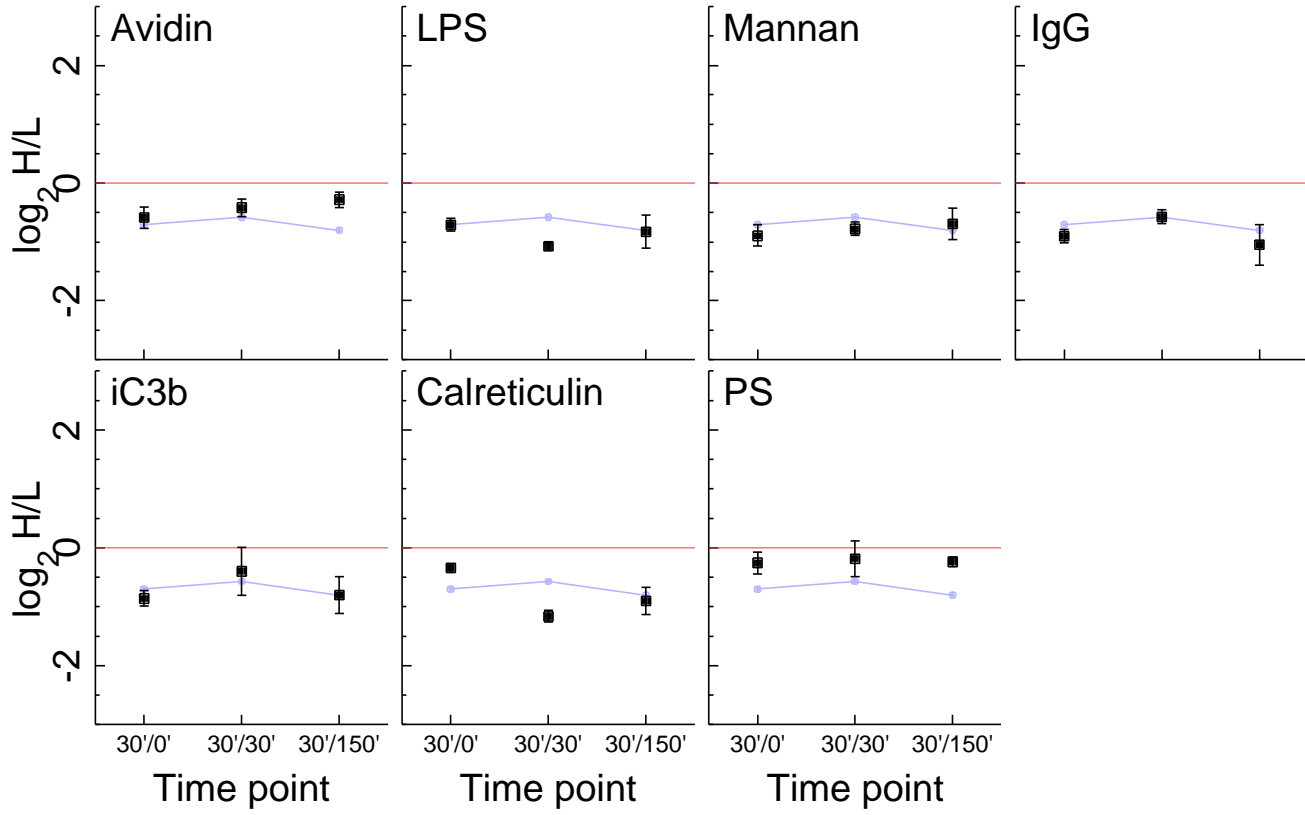

mpo (P11247)

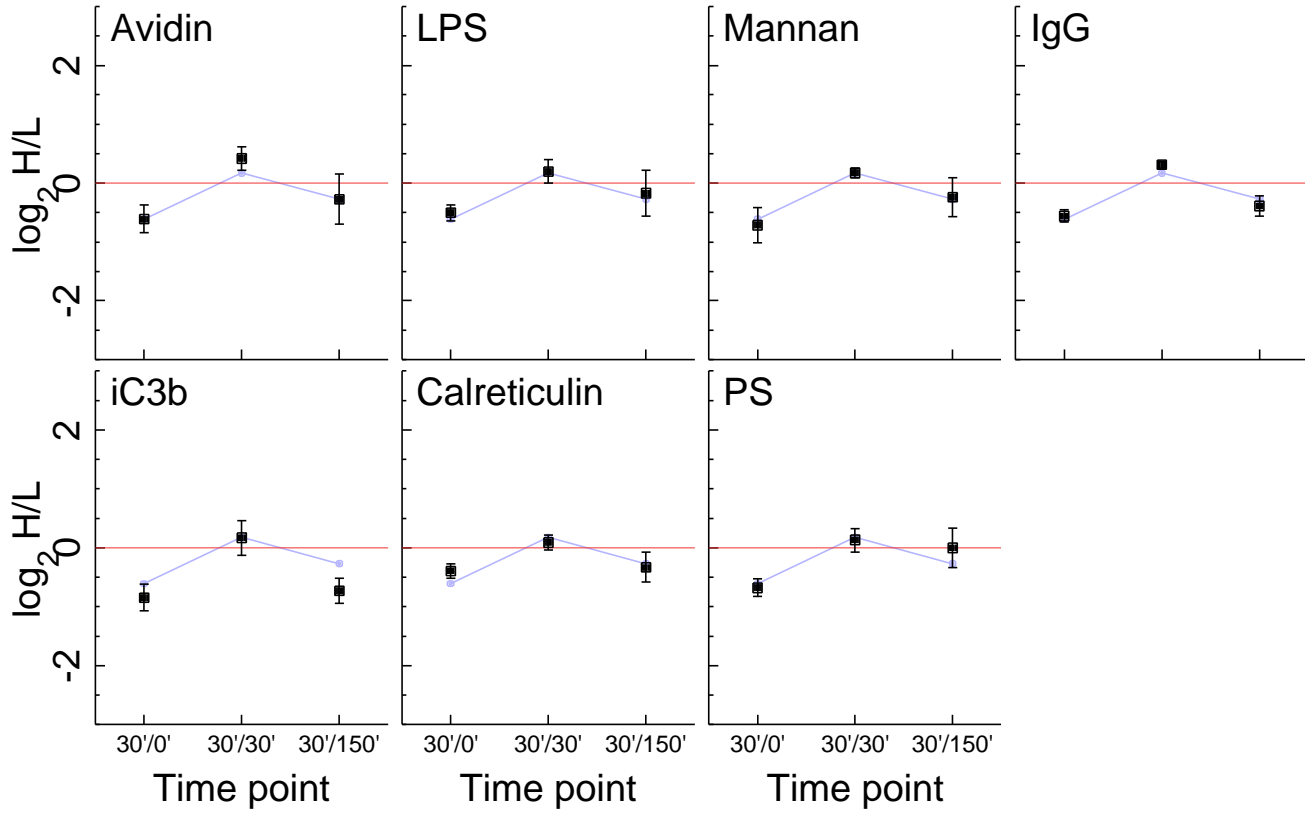

### mpp1 (P70290)

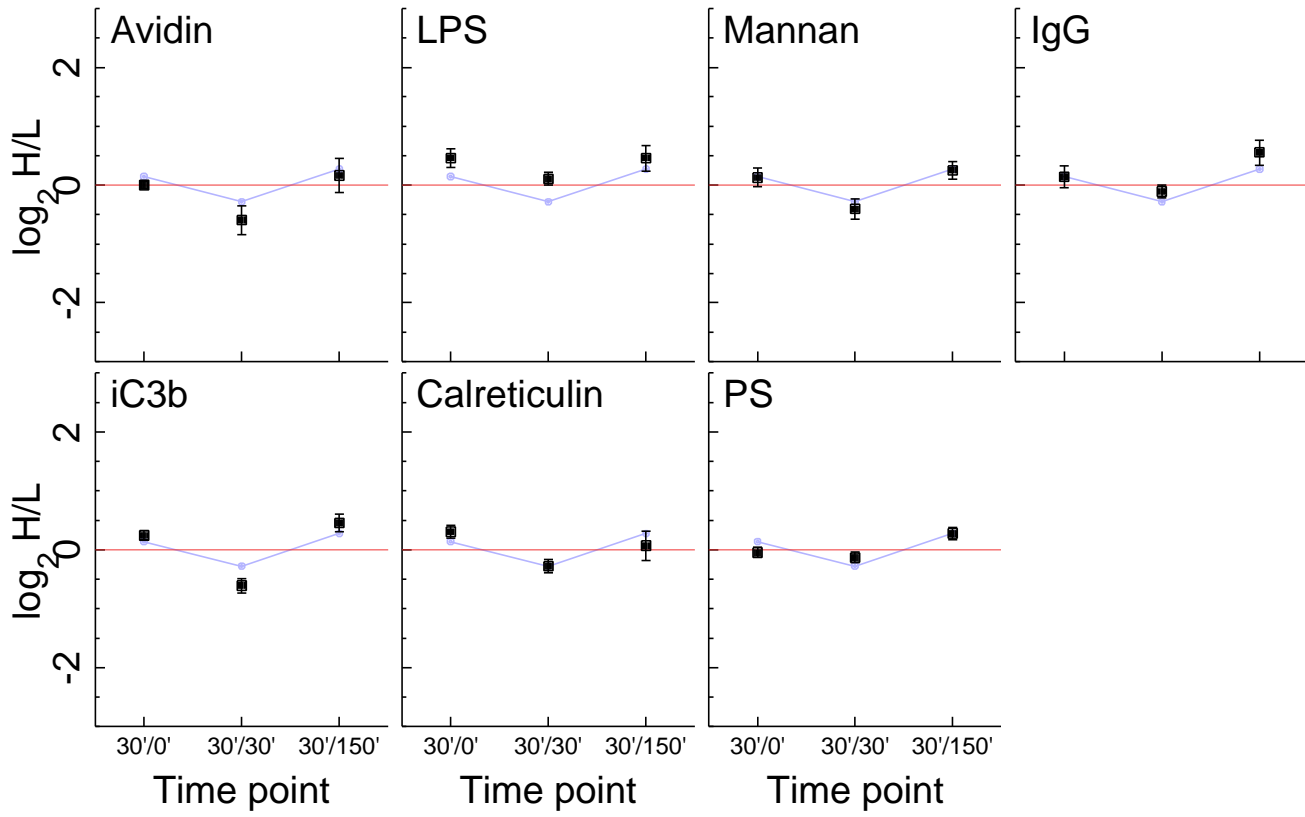

### mrc1 (Q61830)

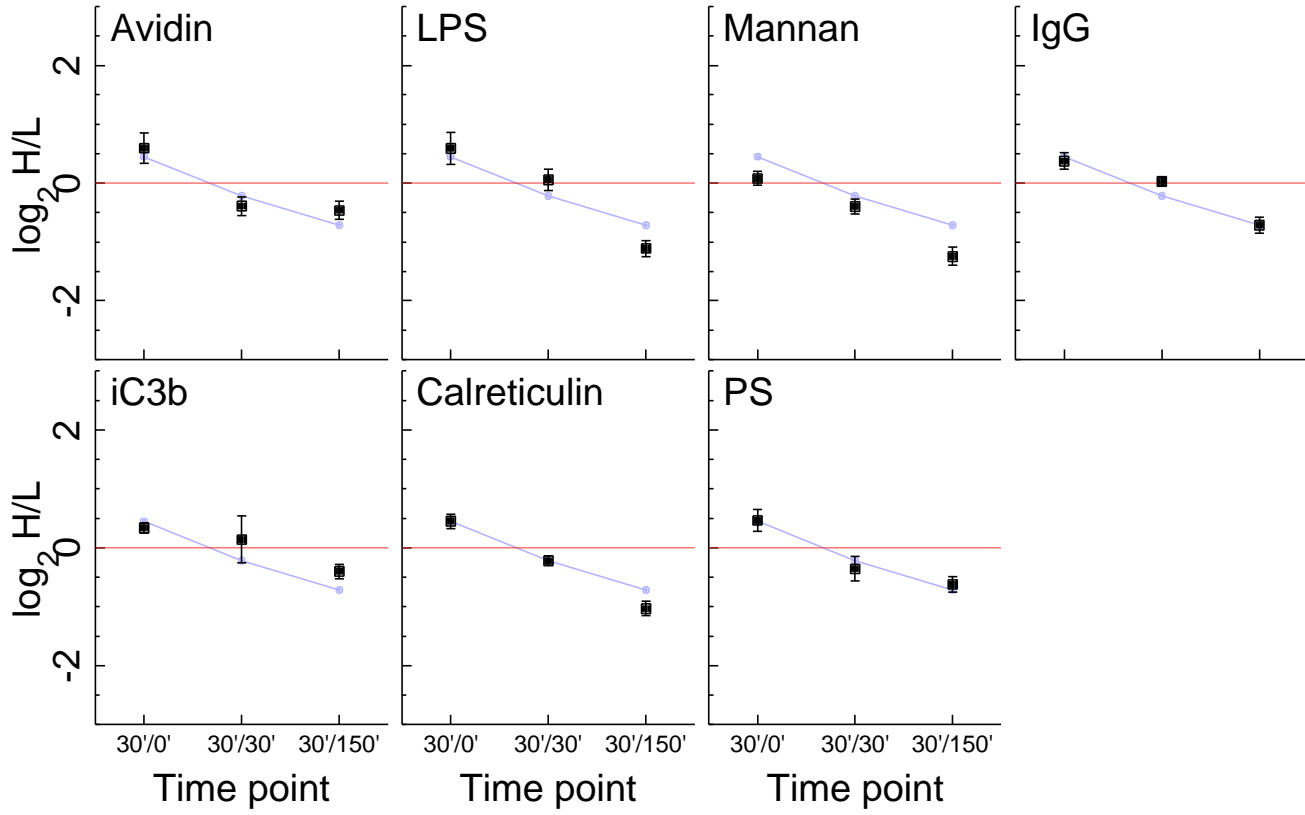



ms4a4c (Q9D3F6)

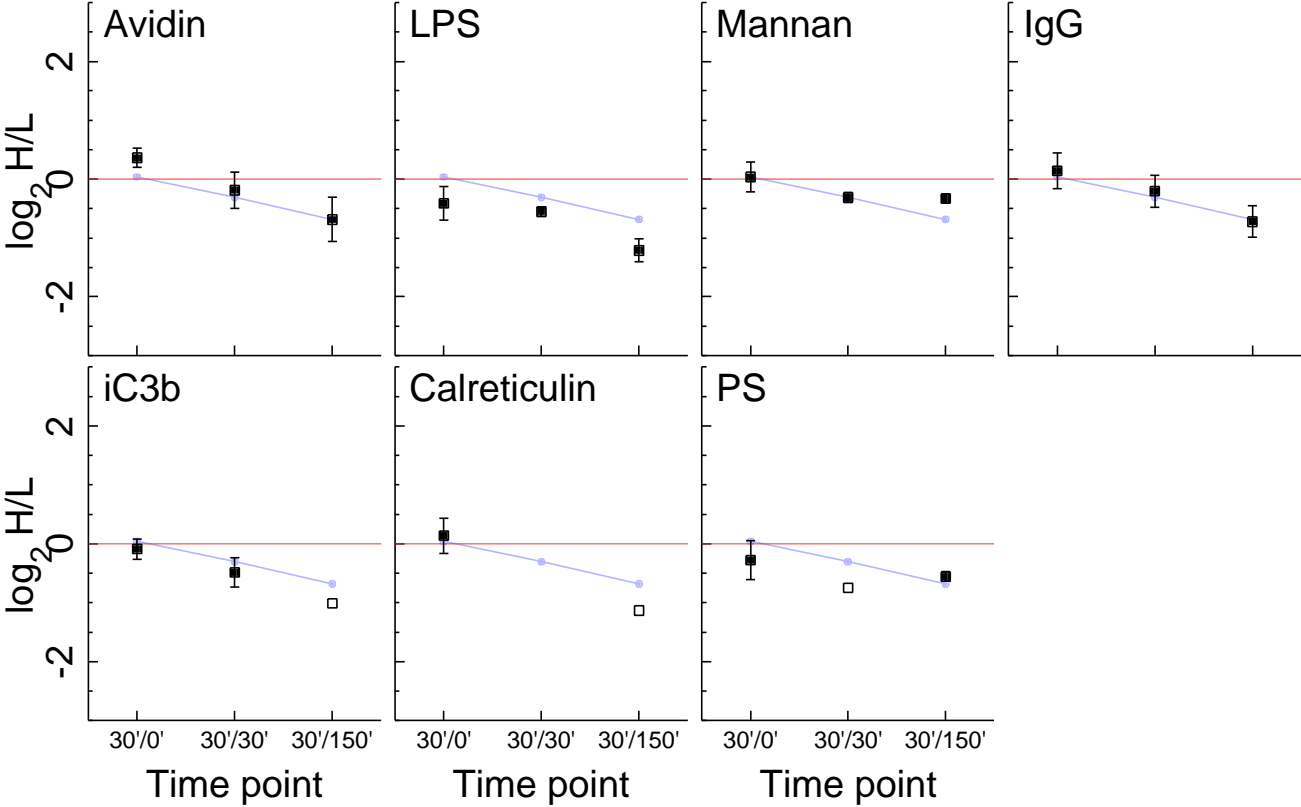

msn (P26041)

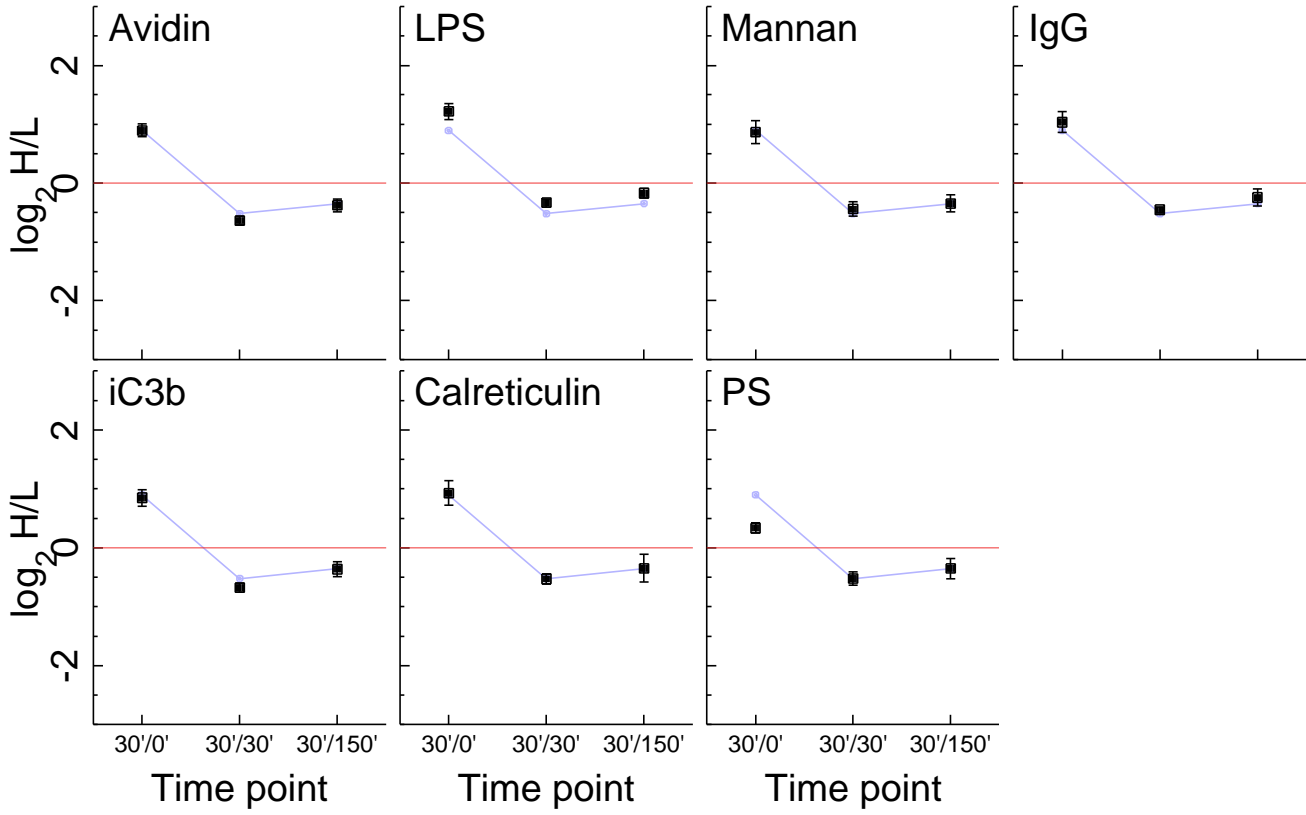

mnr1 (P30204)

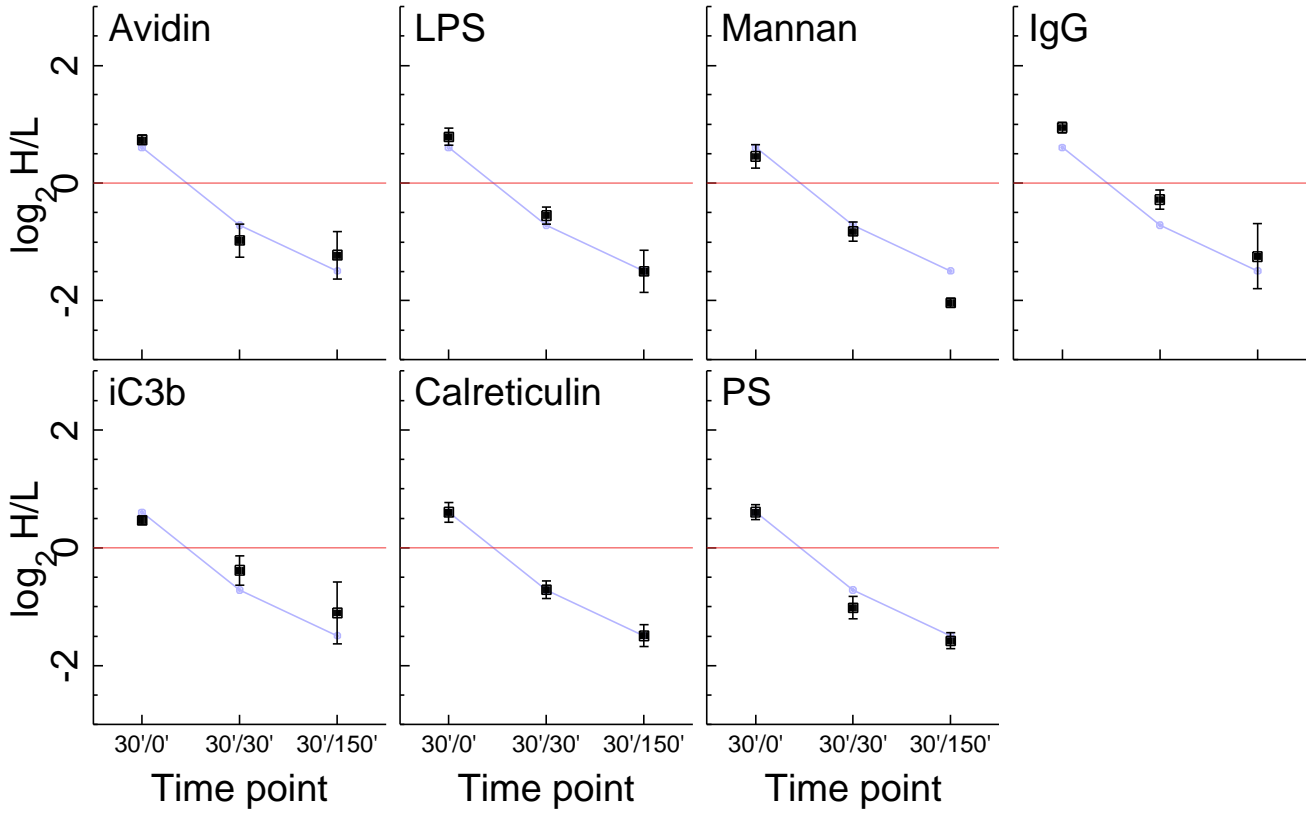

msra (Q9D6Y7)

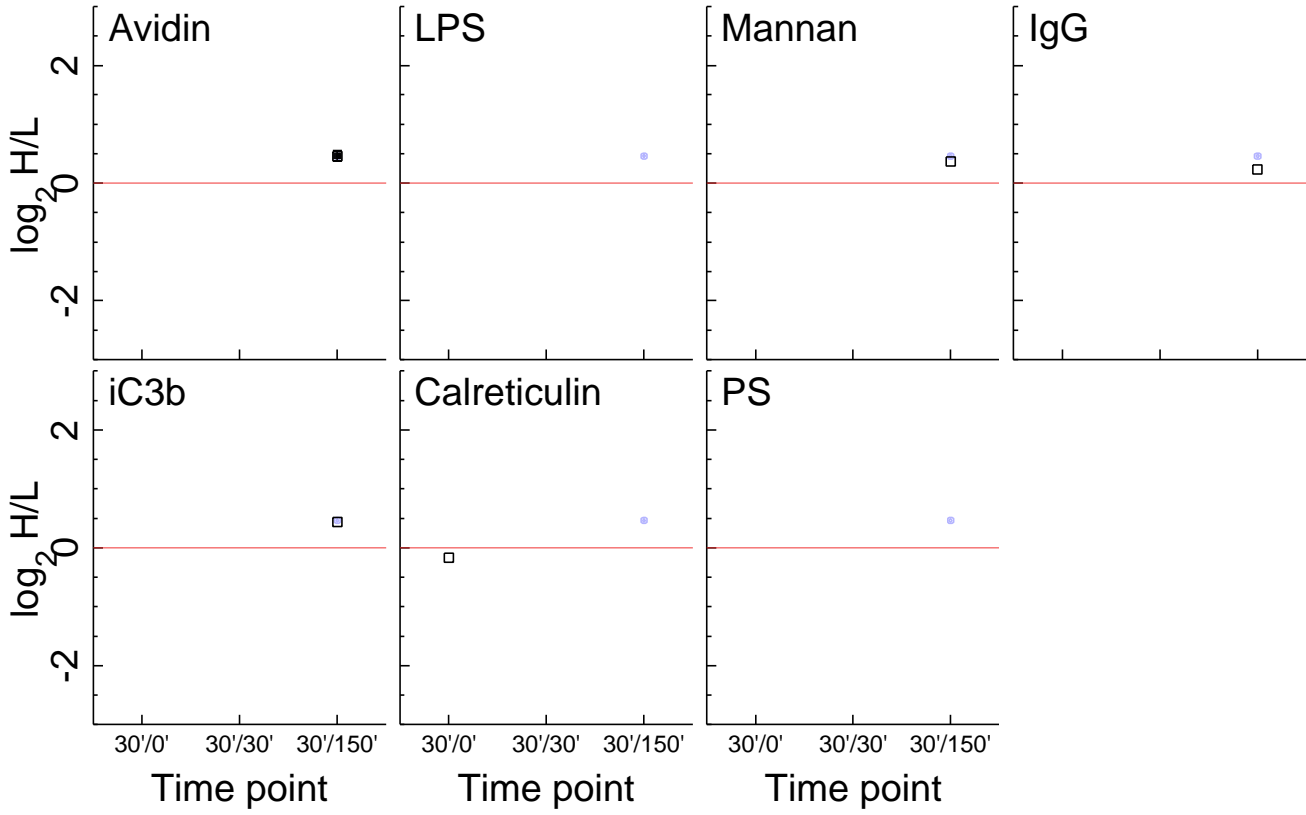

mtatp8 (P03930)

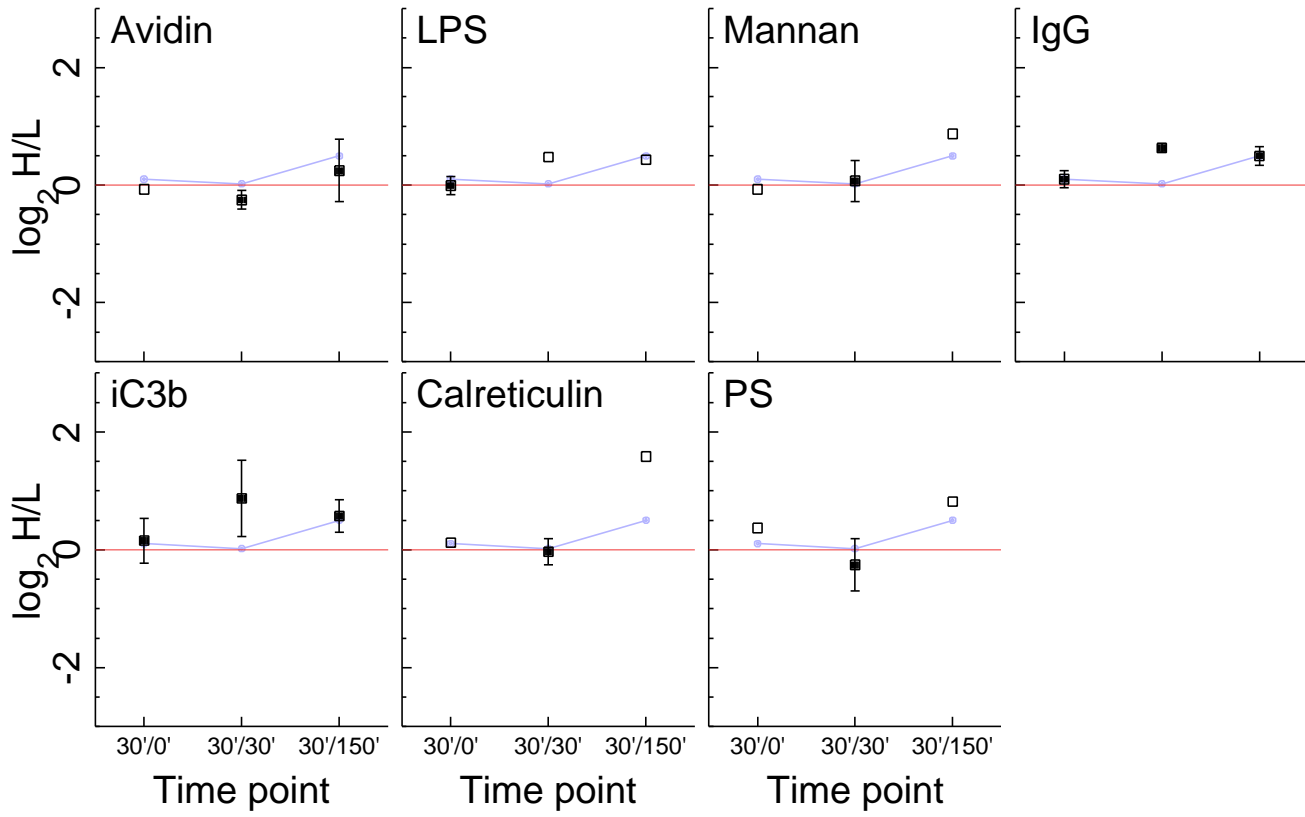

mtch2 (Q9D050)

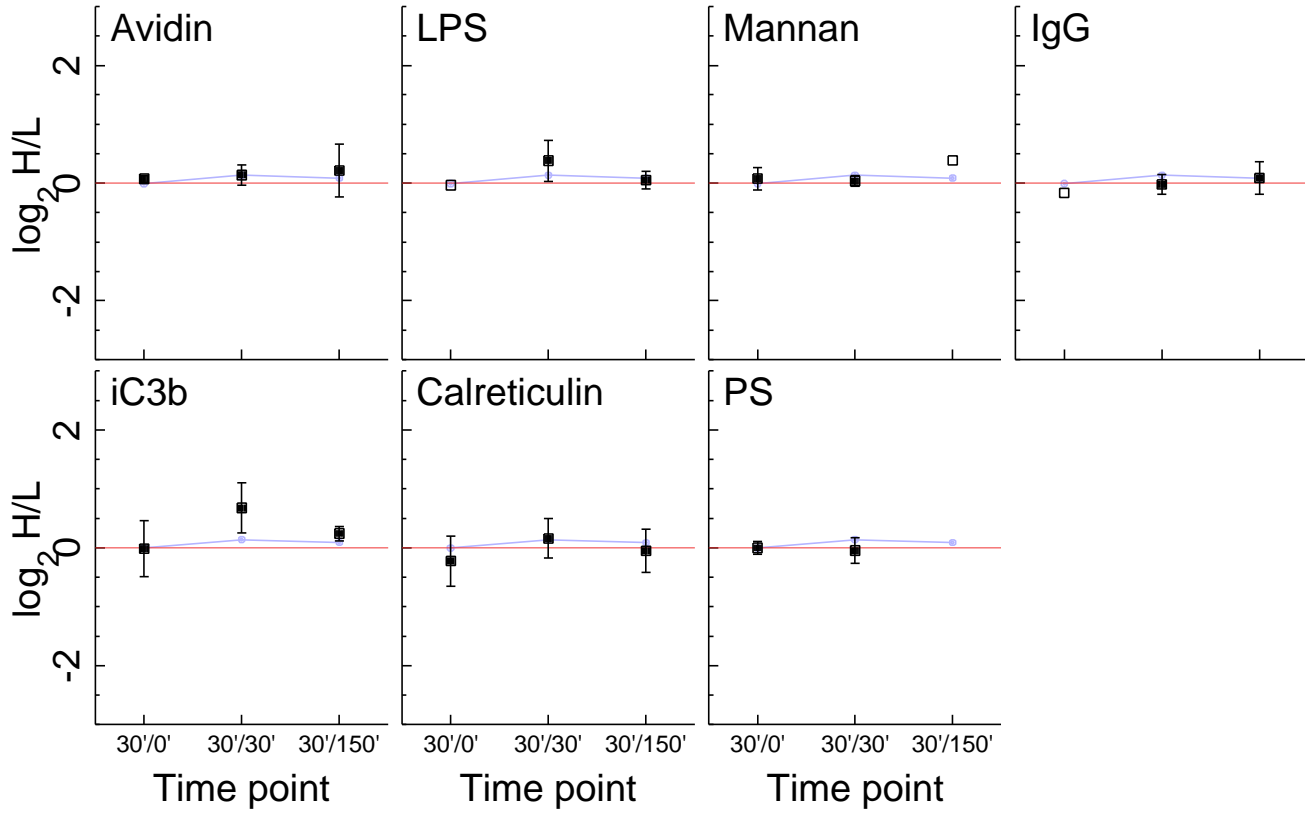

mtco1 (P00397)

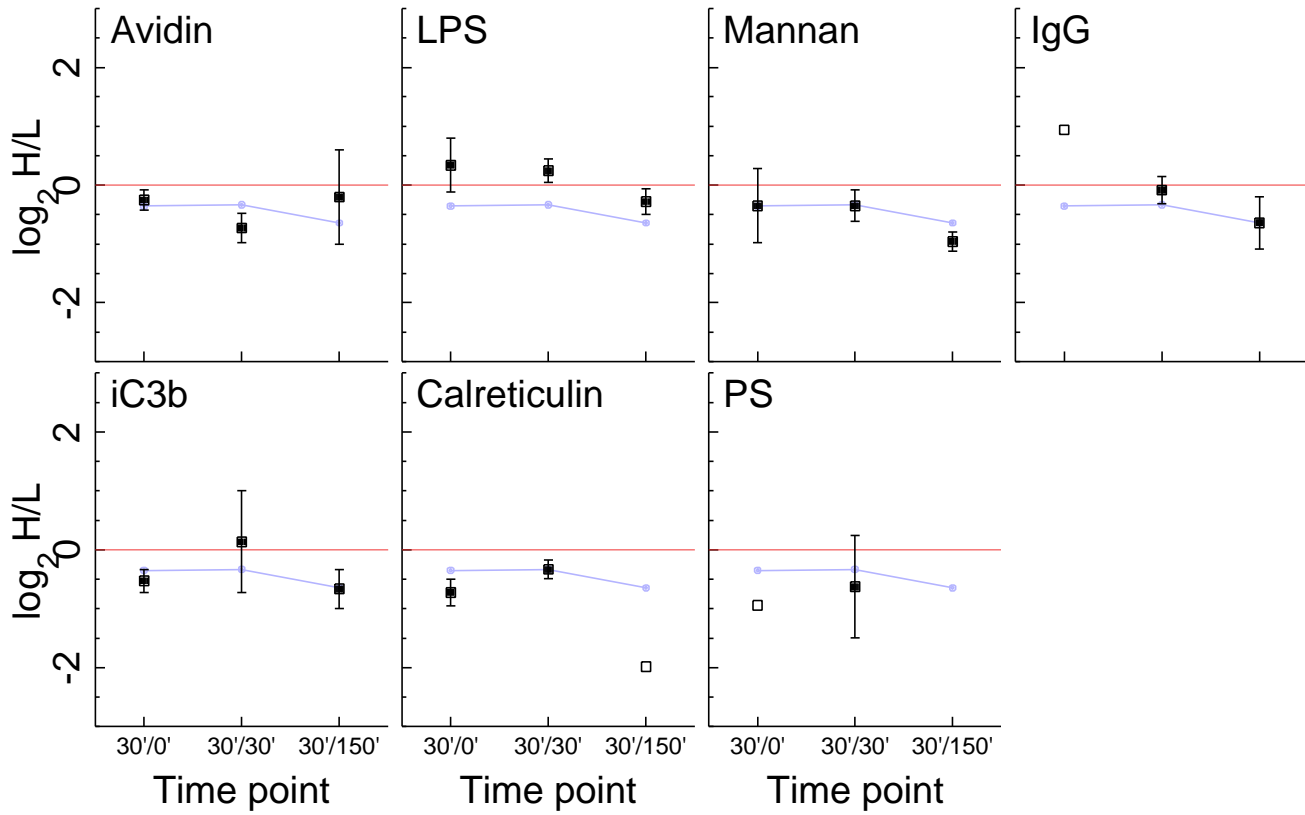

mtco2 (P00405)

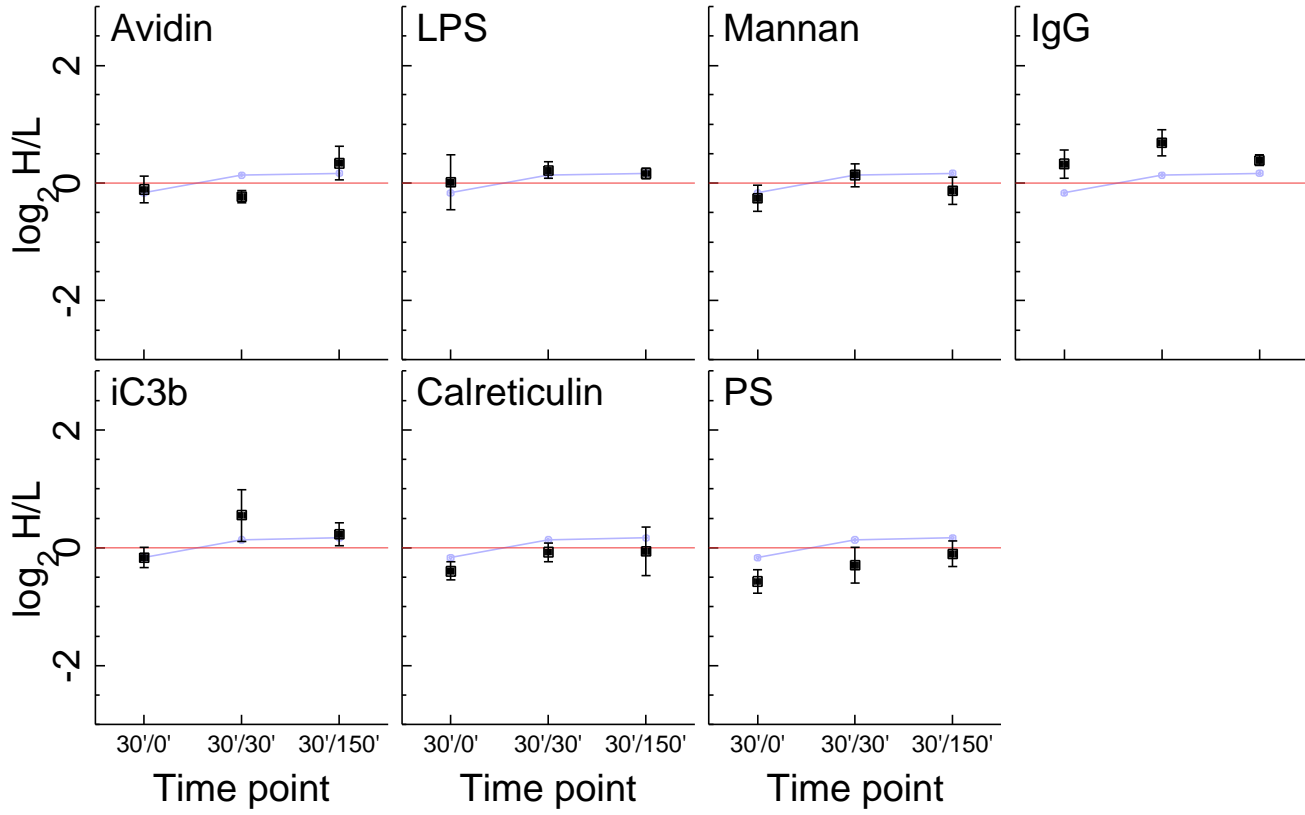



mtdh (Q80WJ7)

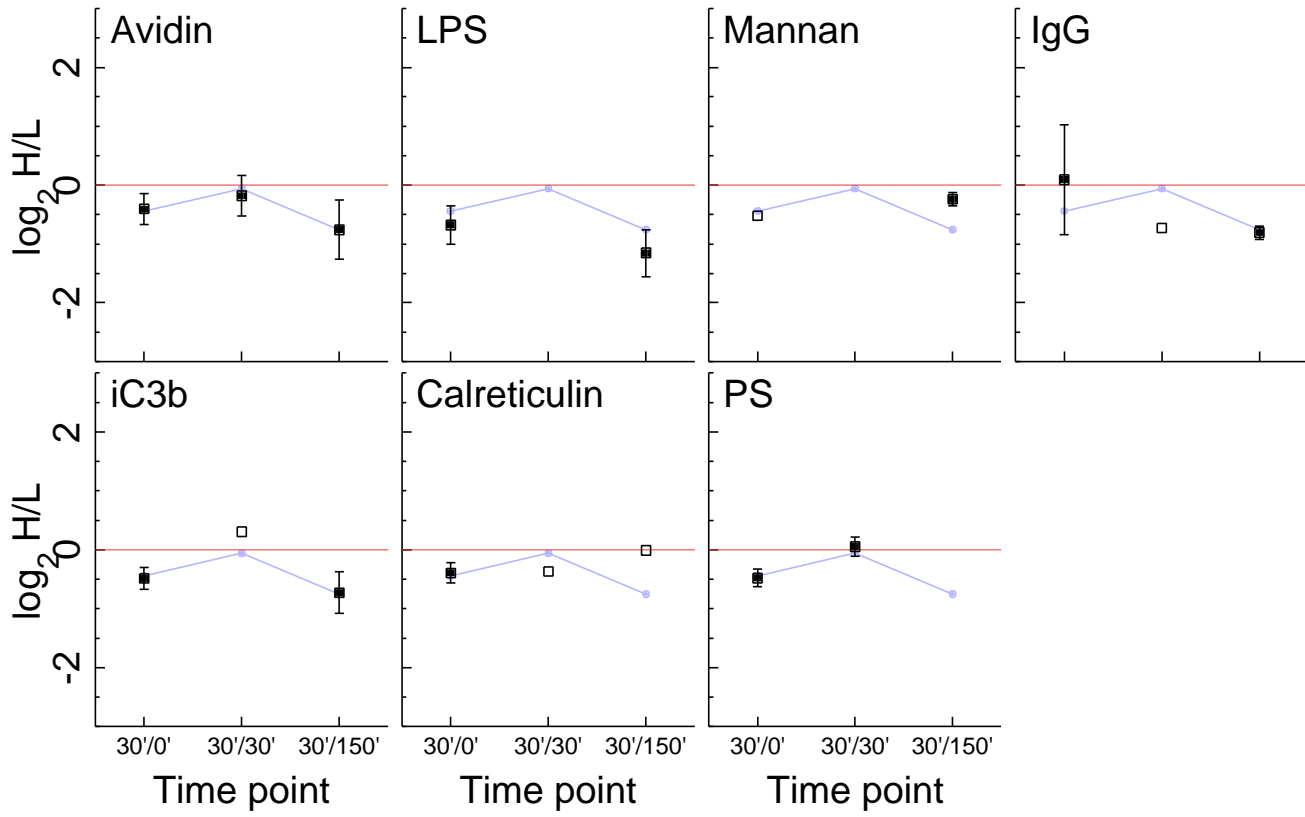

mtss1 (G3X9H7)

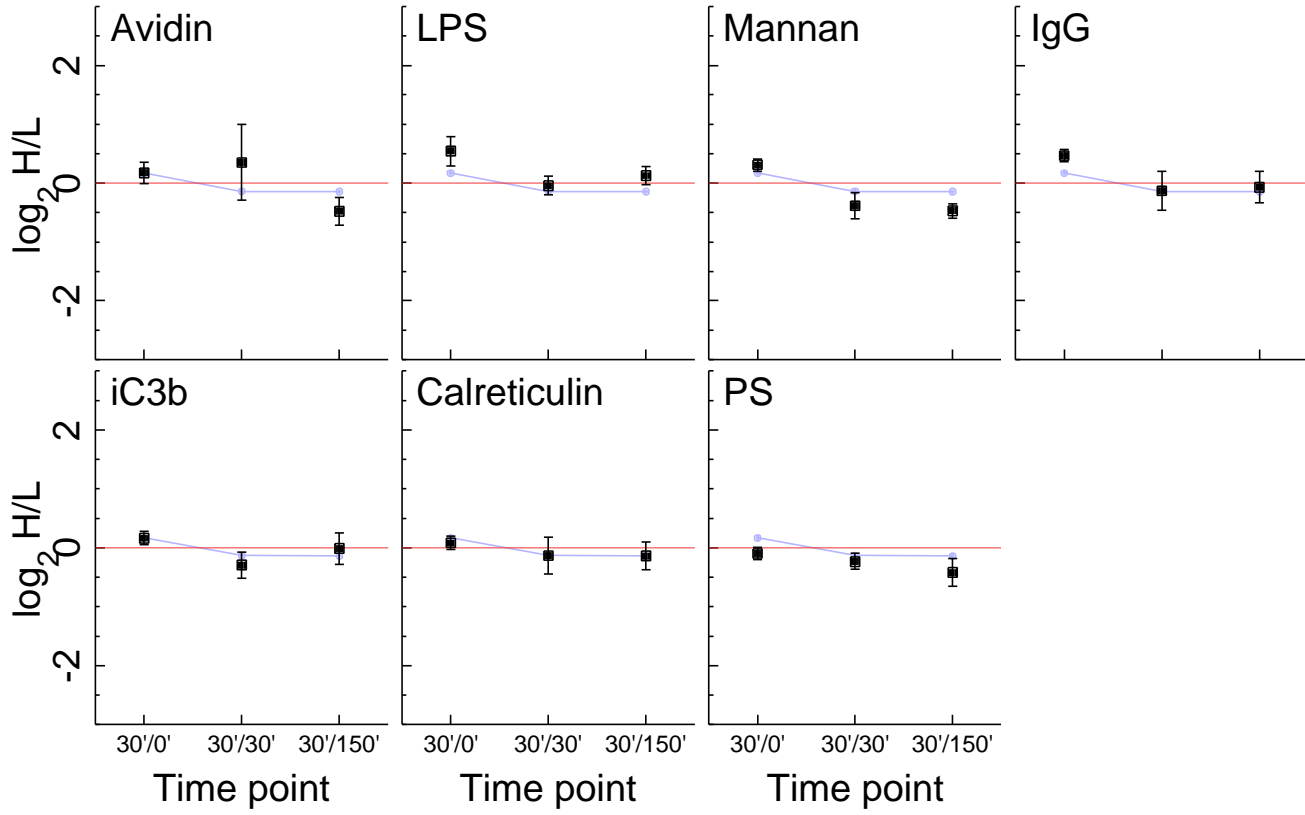

mvp (E9Q3X0)

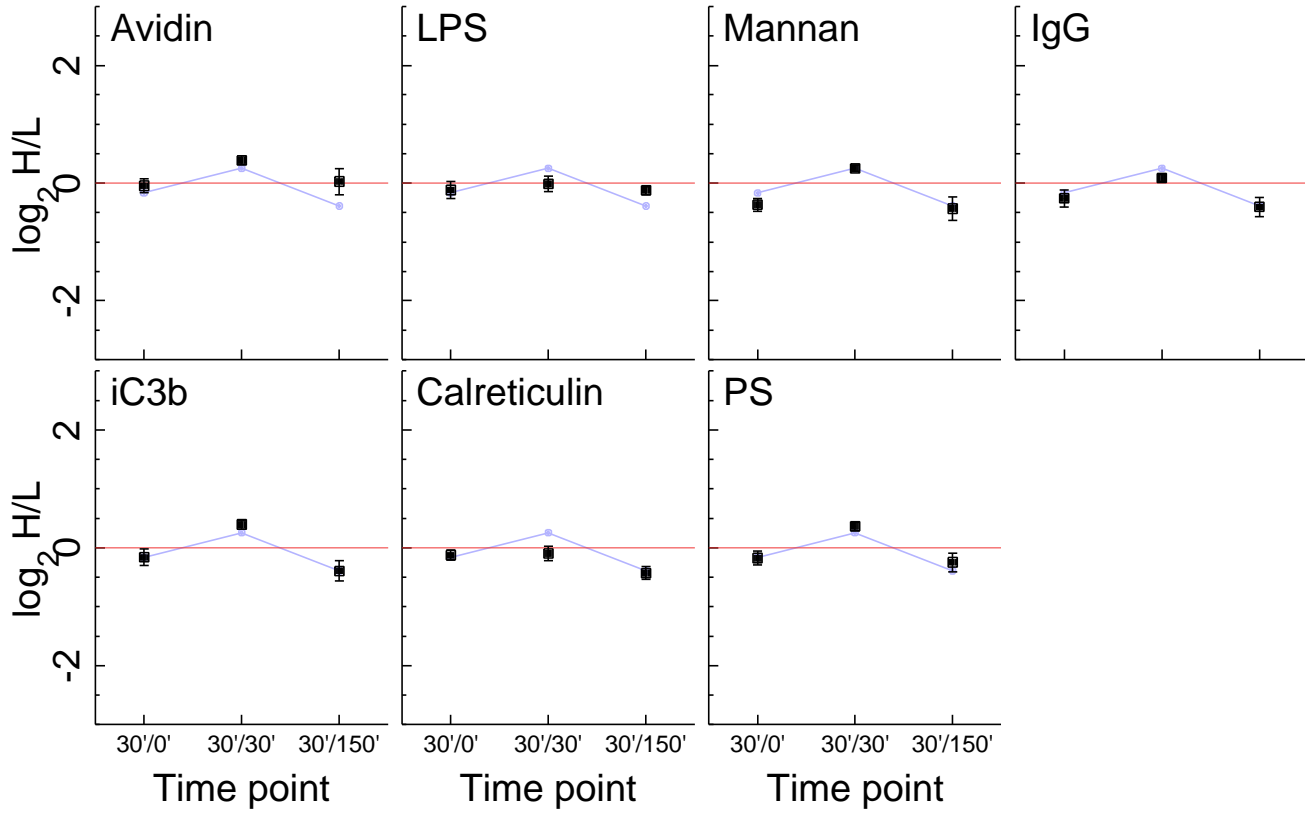

myadm (O35682)

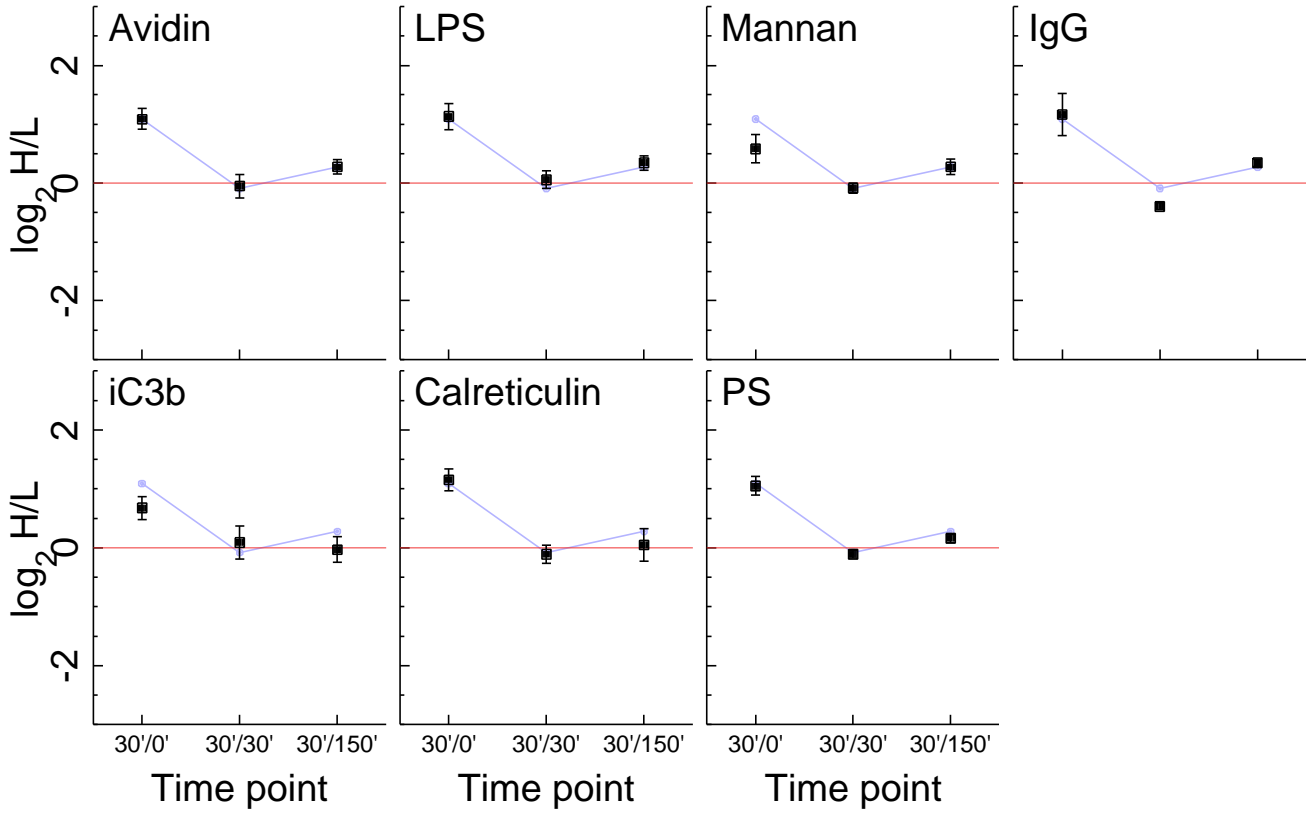

myh14 (Q6URW6)

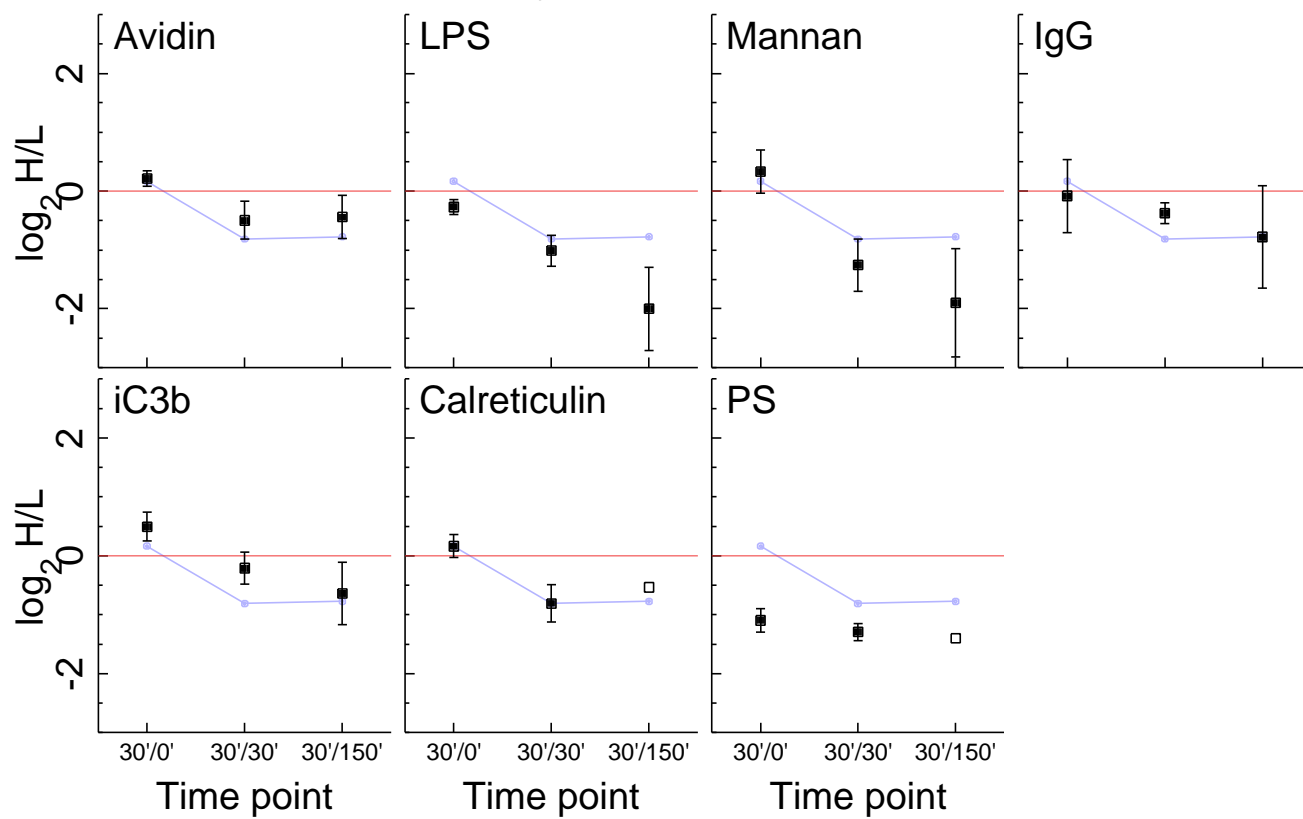

myh9 (Q8VDD5)

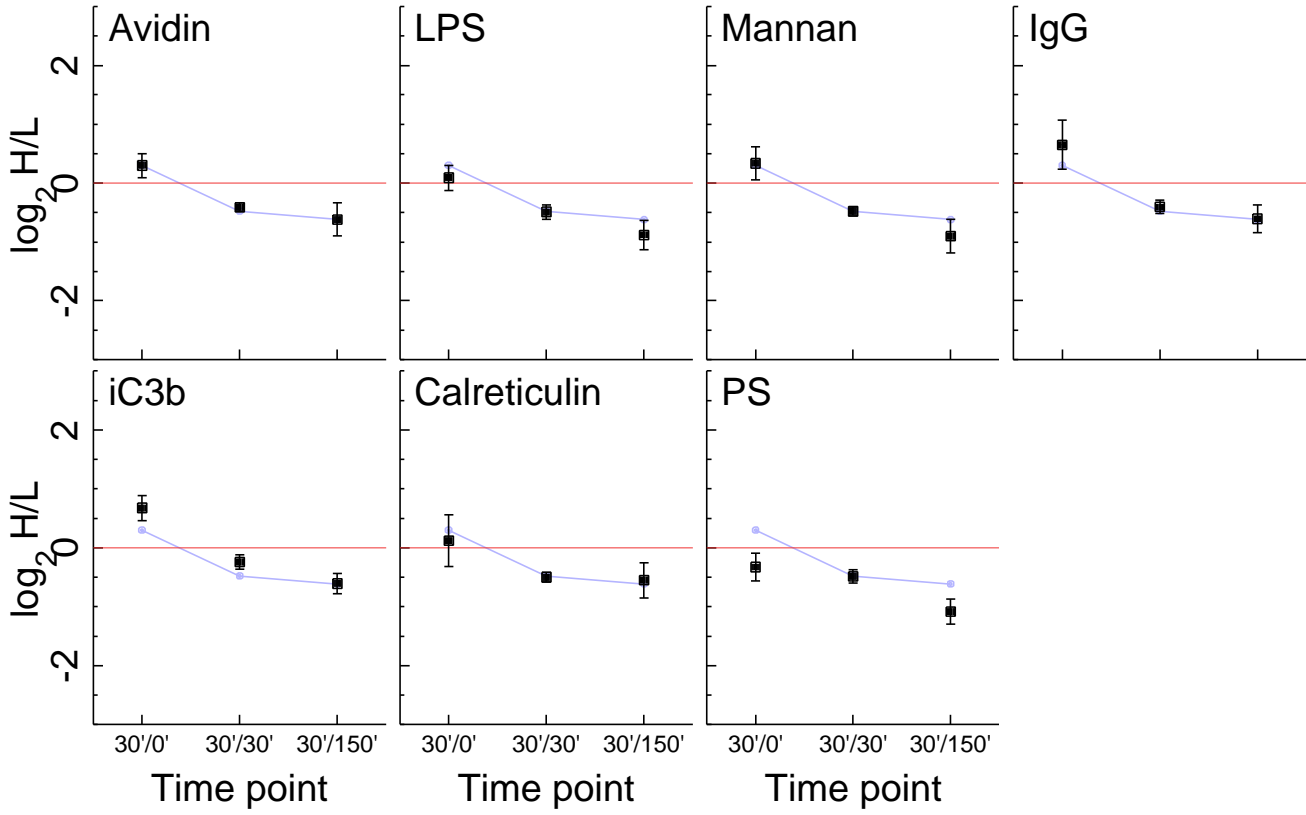

### myl12a (Q6ZWQ9)

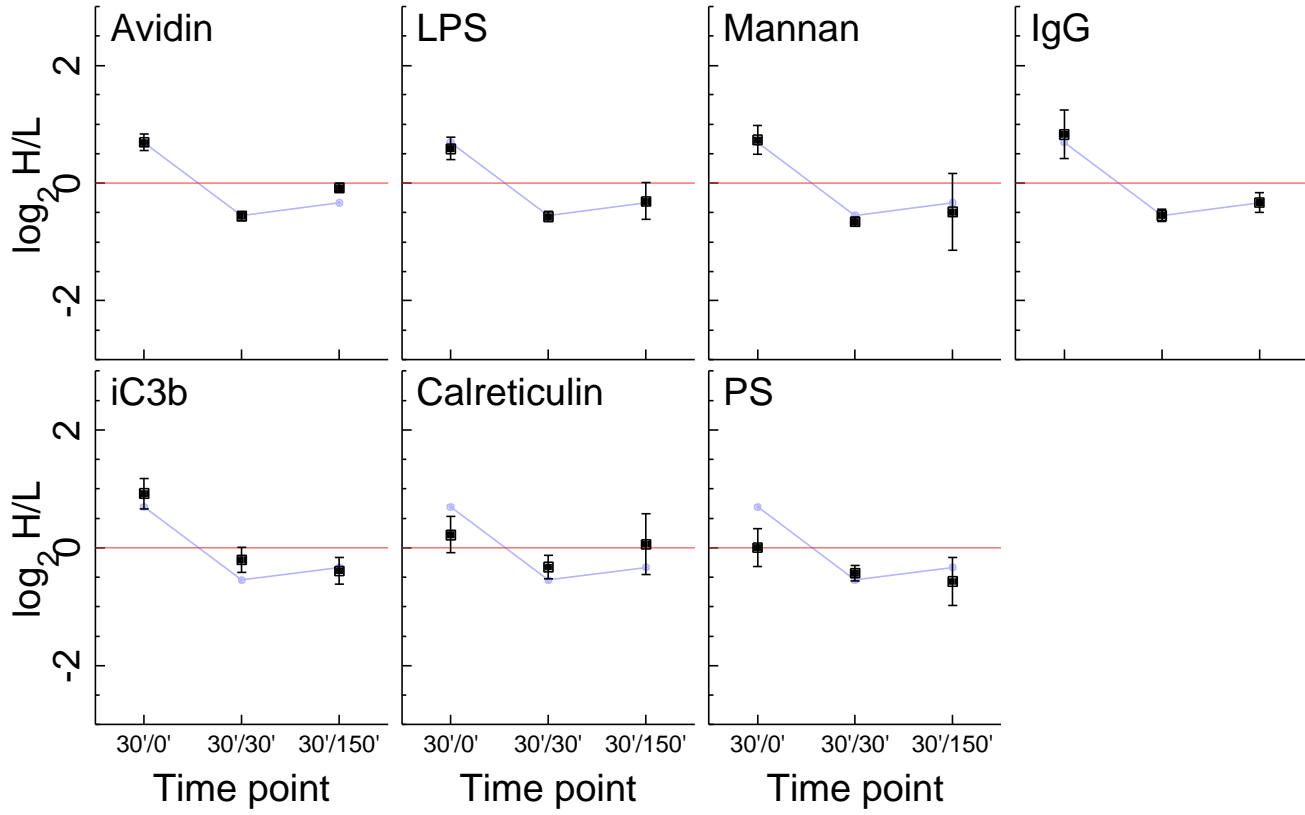

myl3 (P09542)

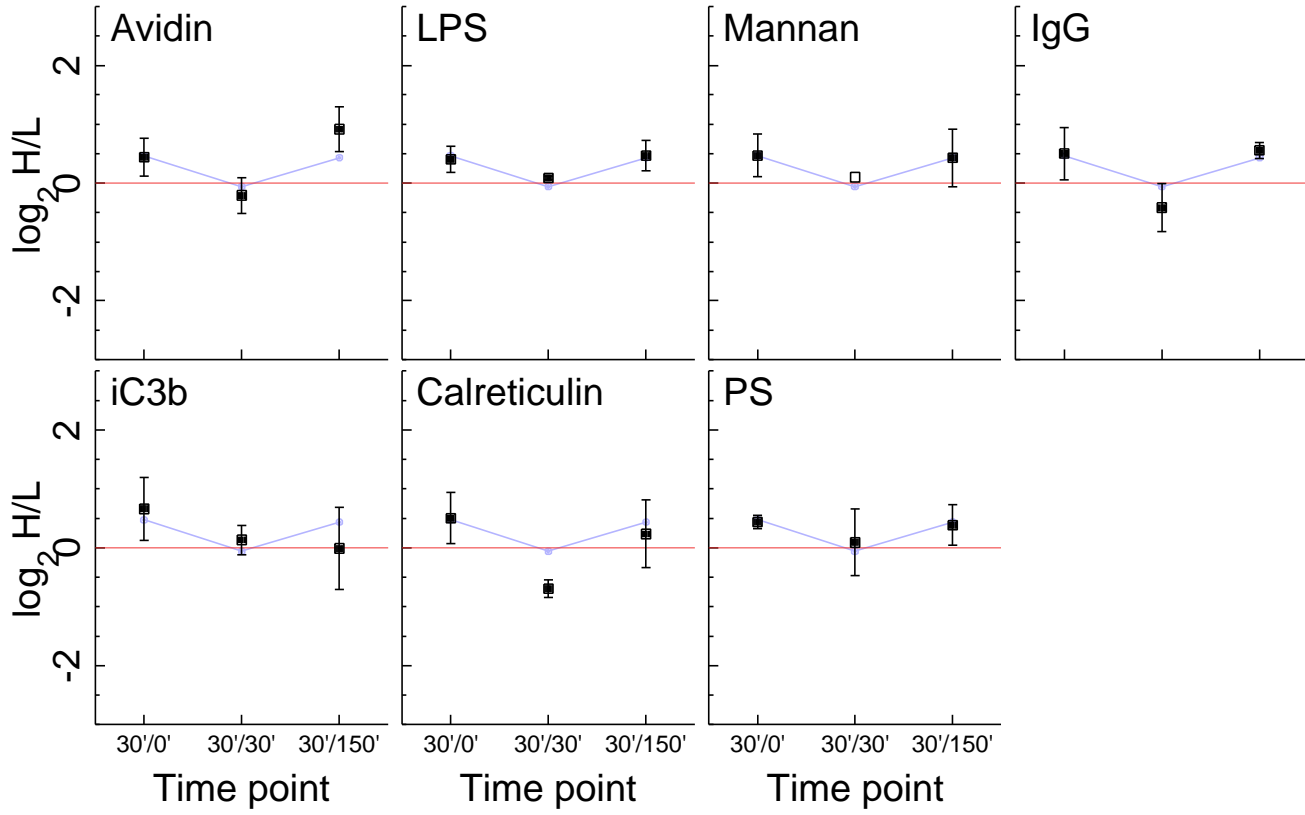



### myl6 (Q60605)

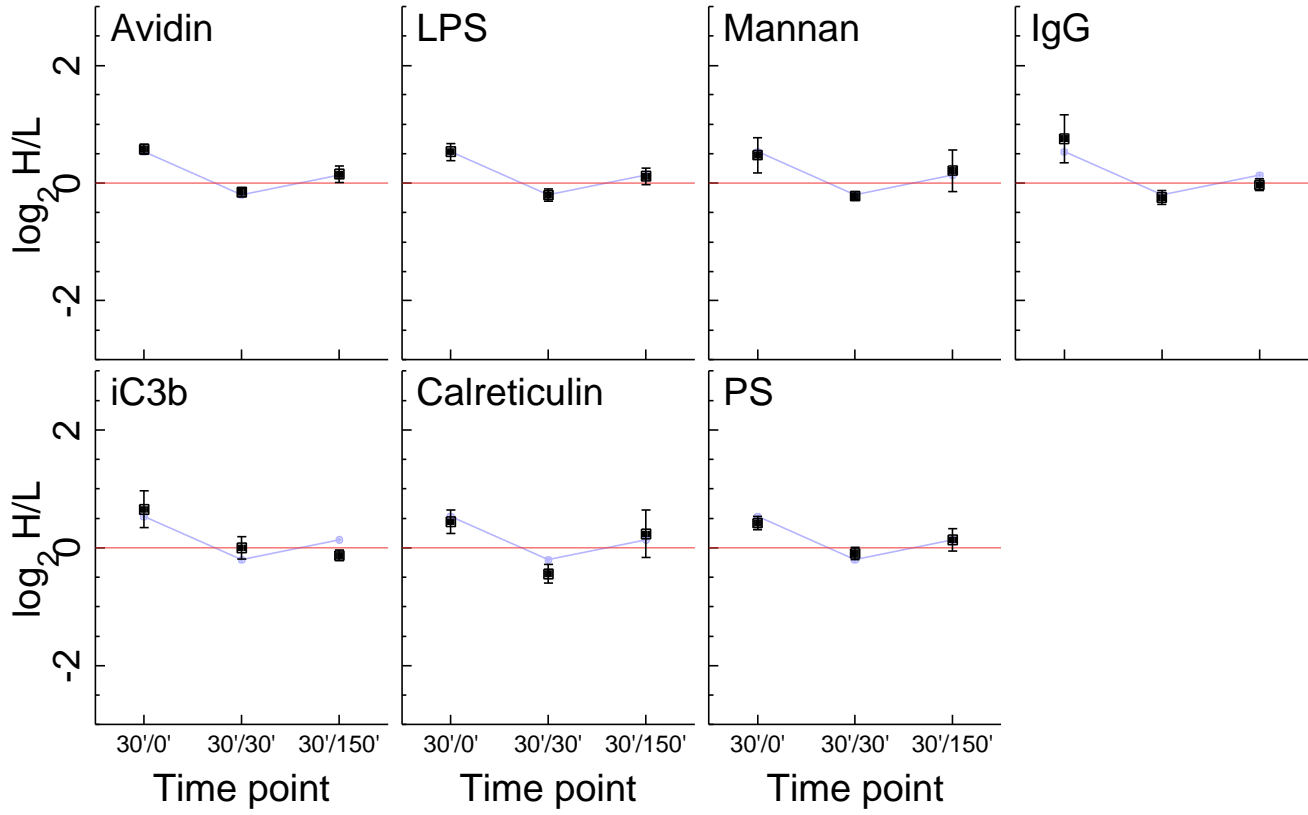

myo1c (Q9WTI7)

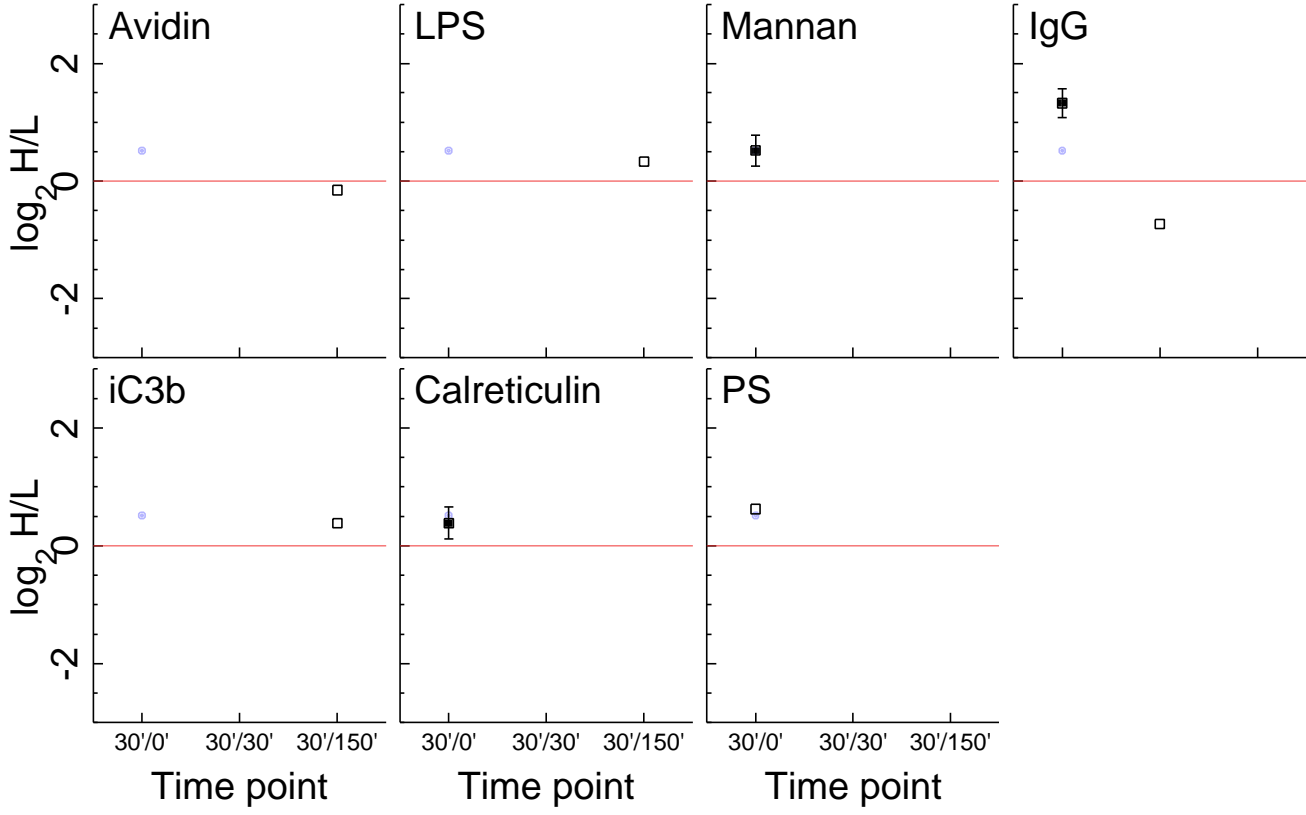

myo1e (E9Q634)

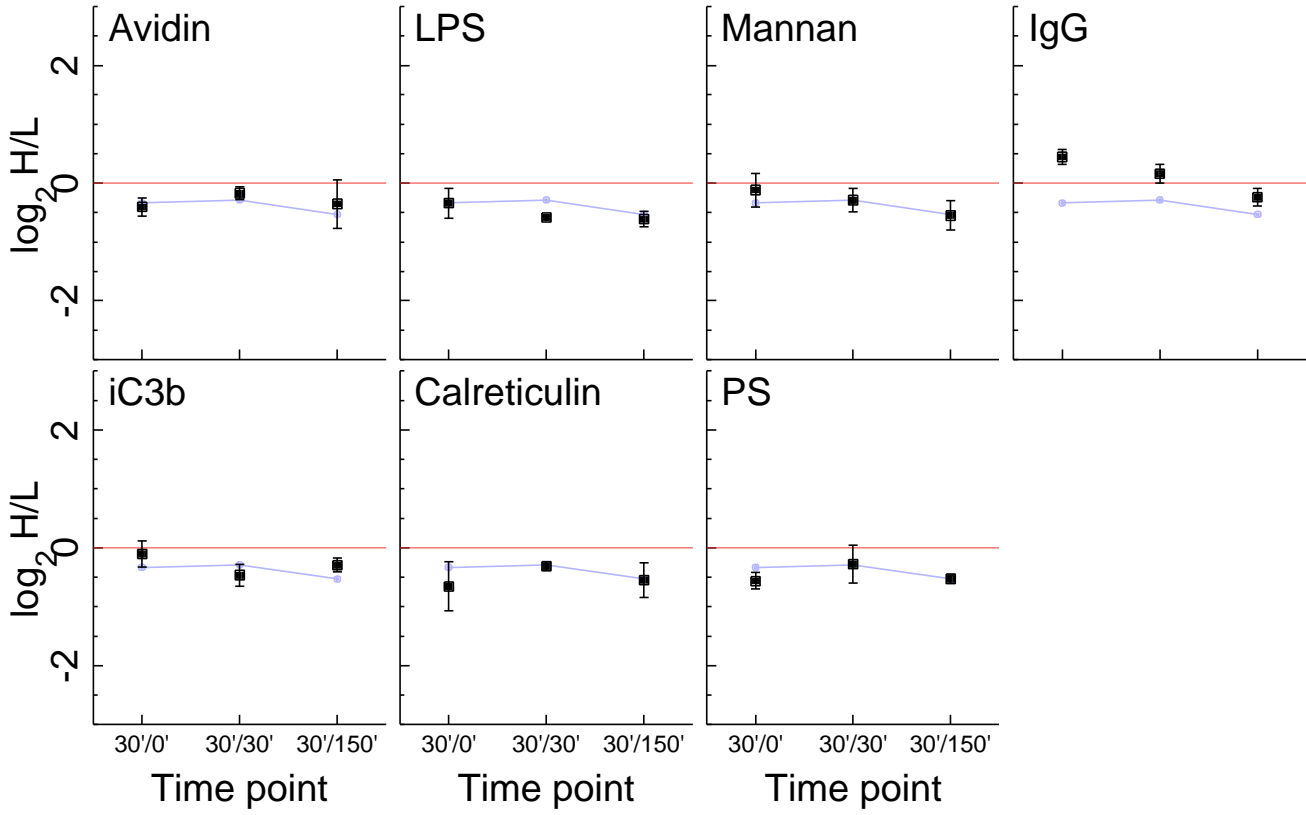

myo1f (Q8CG29)

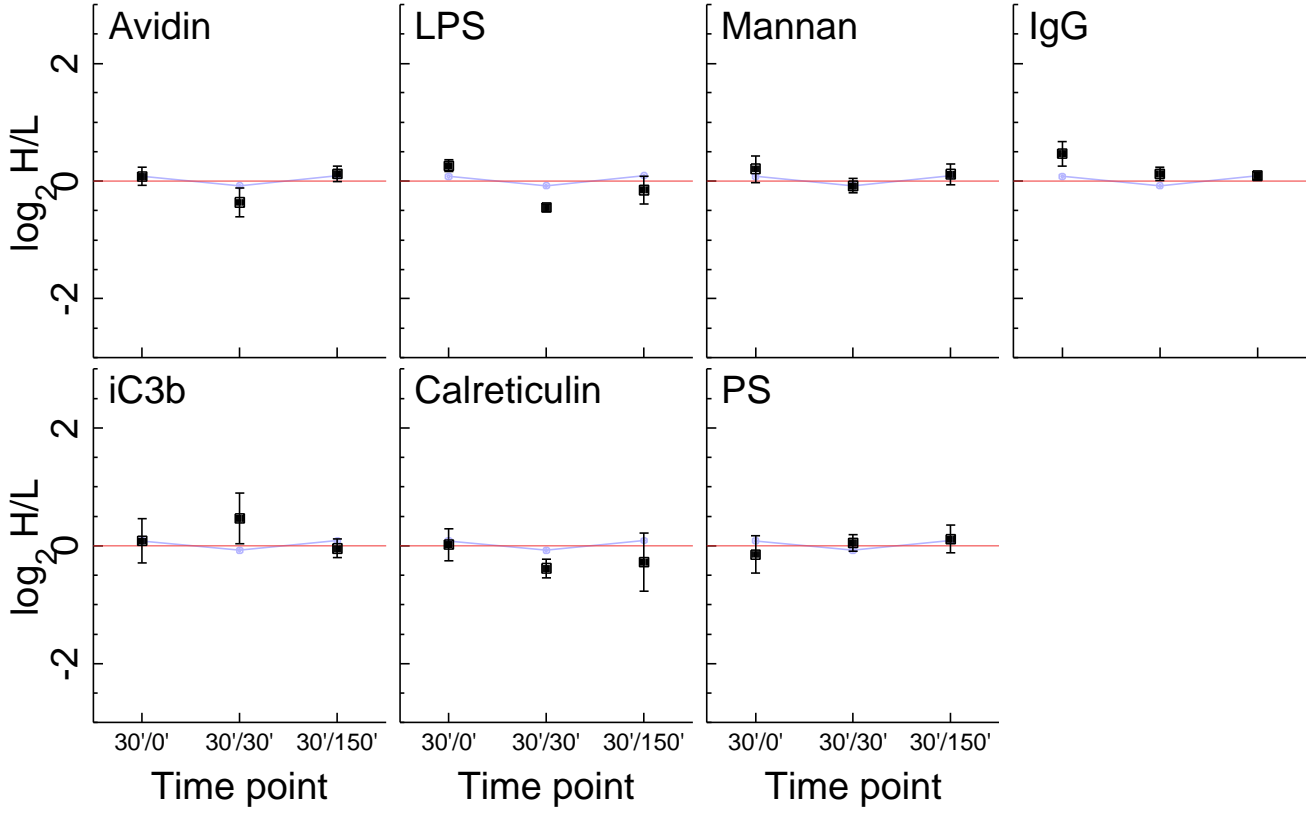

### myo1g (Q5SUA5)

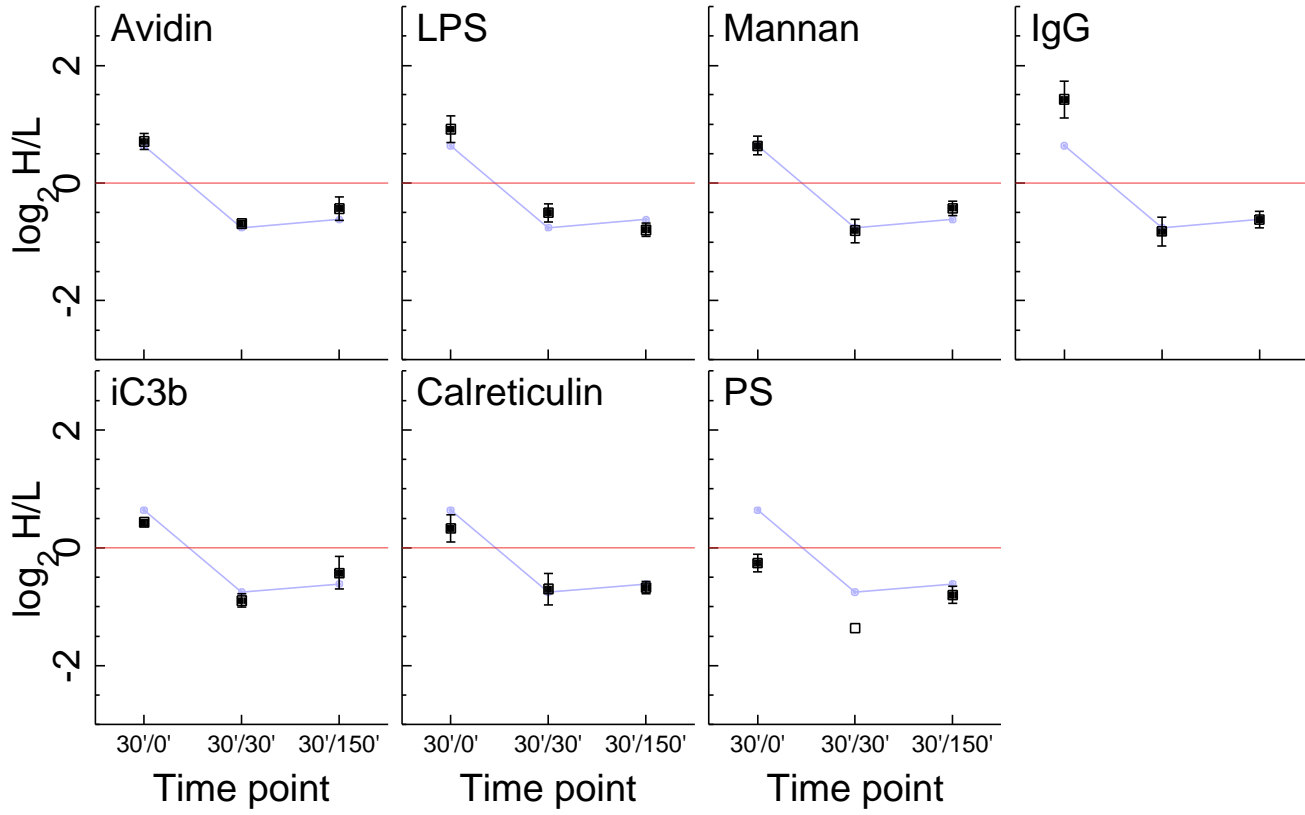

### myo5a (D3Z4J3)

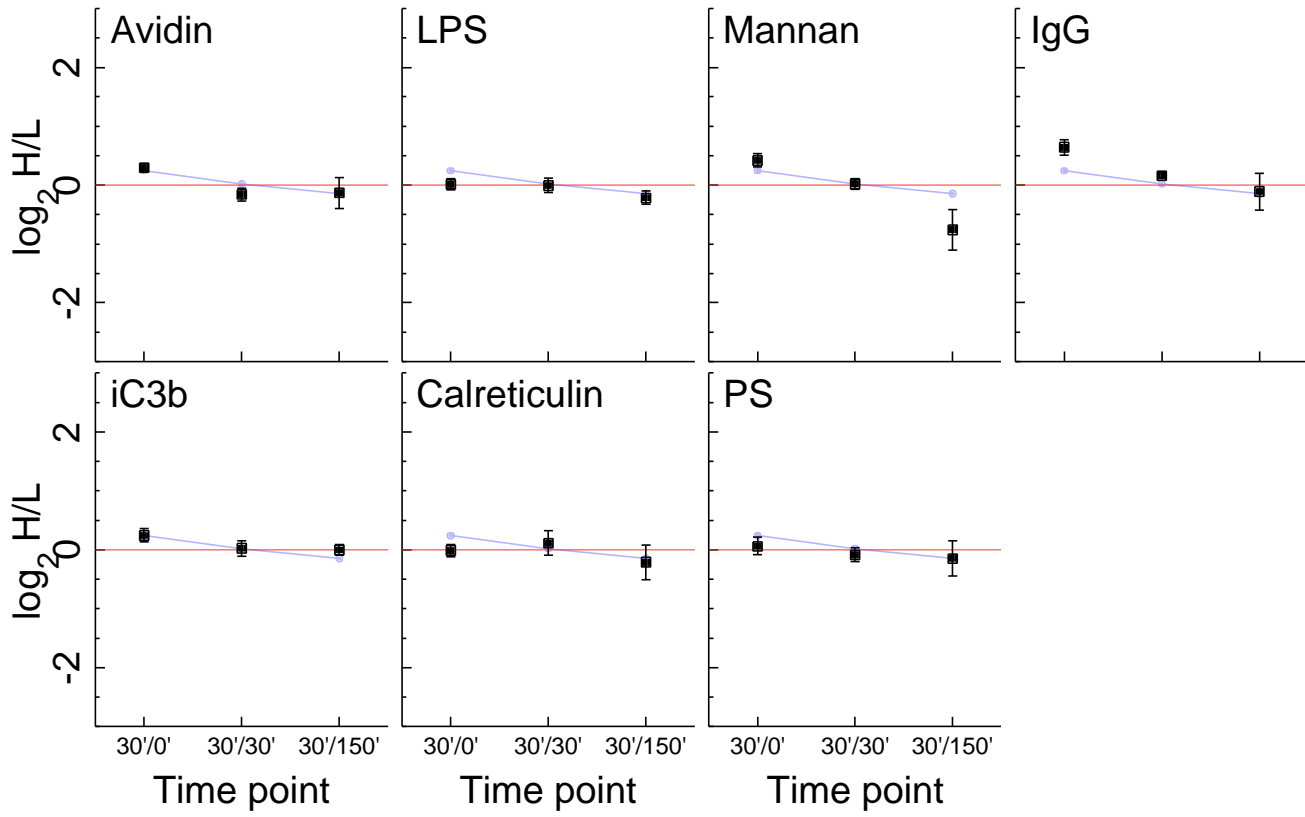

myof (Q69ZN7)

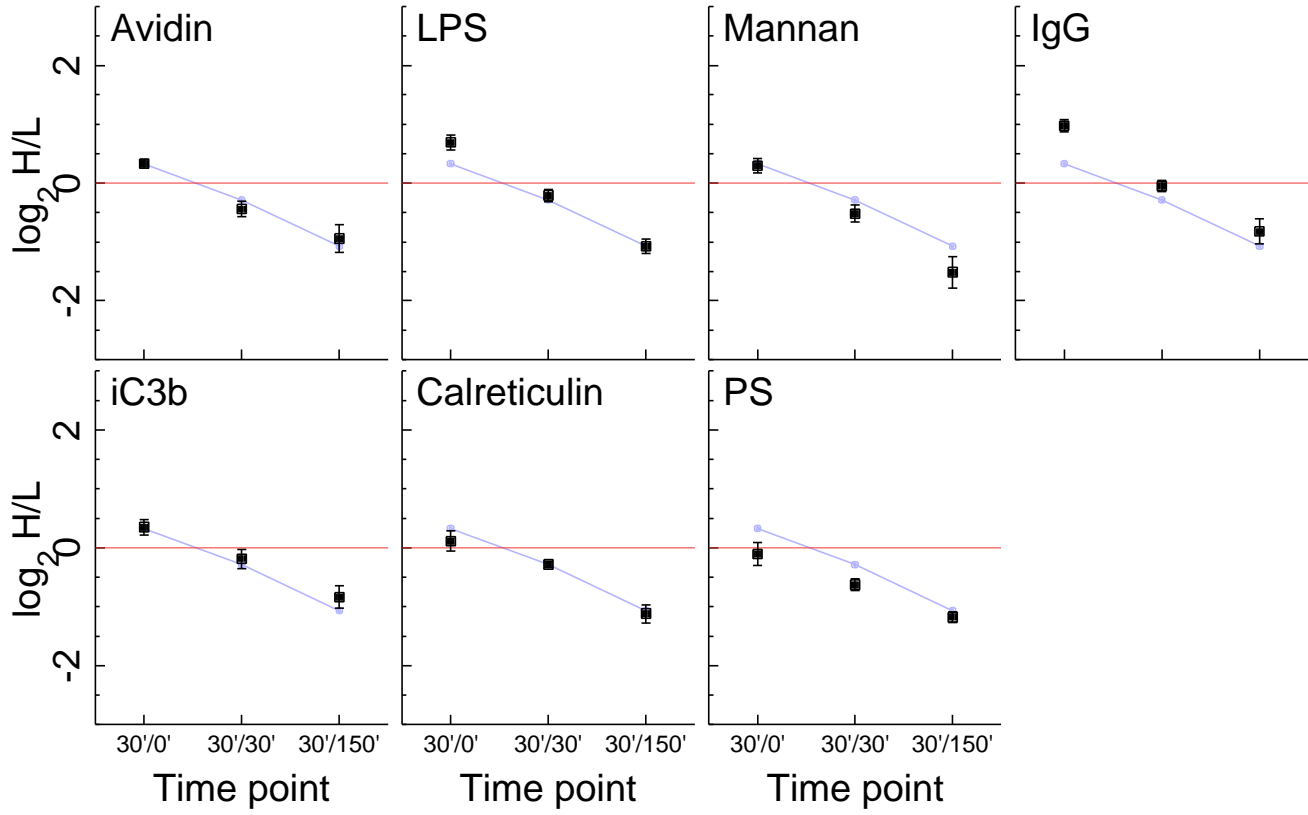

### naaa (Q9D7V9)

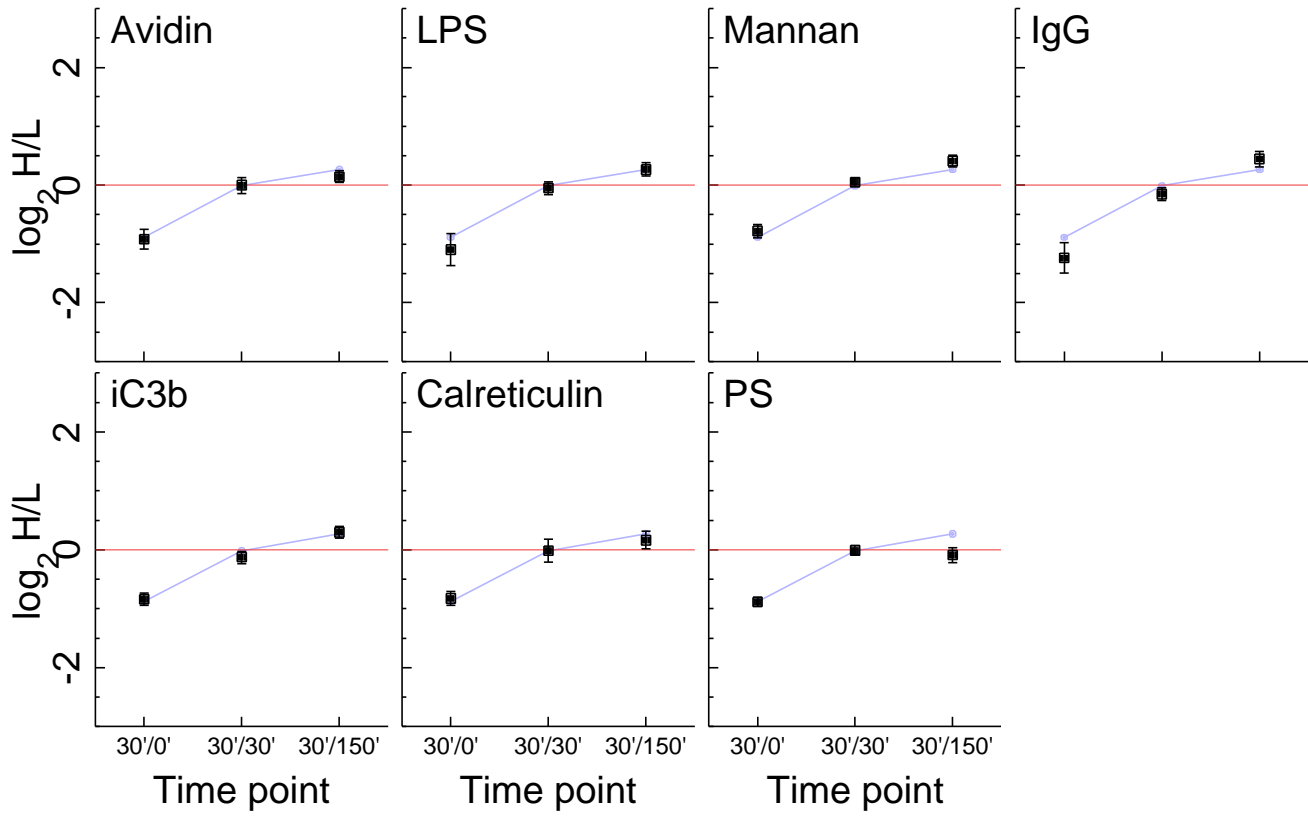



naca (P70670)

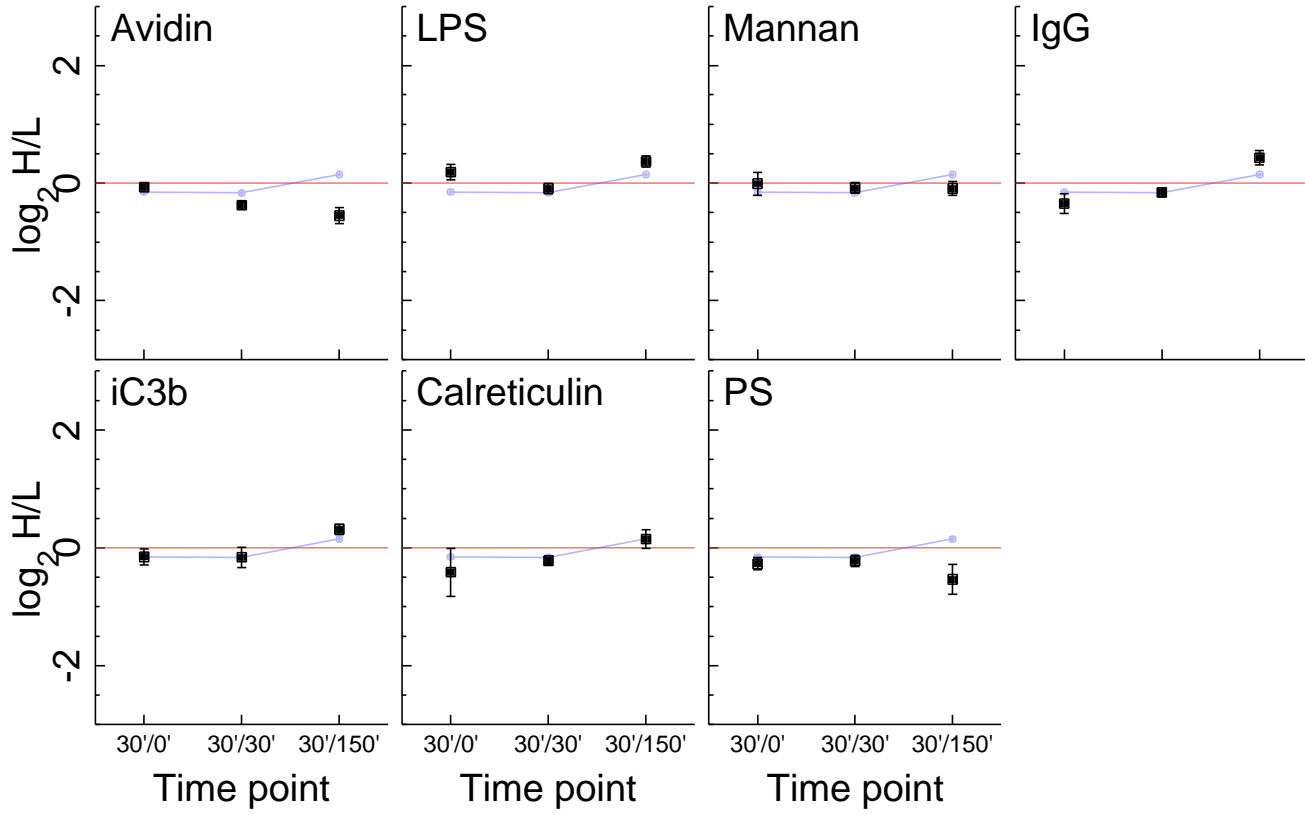

naga (Q9QWR8)

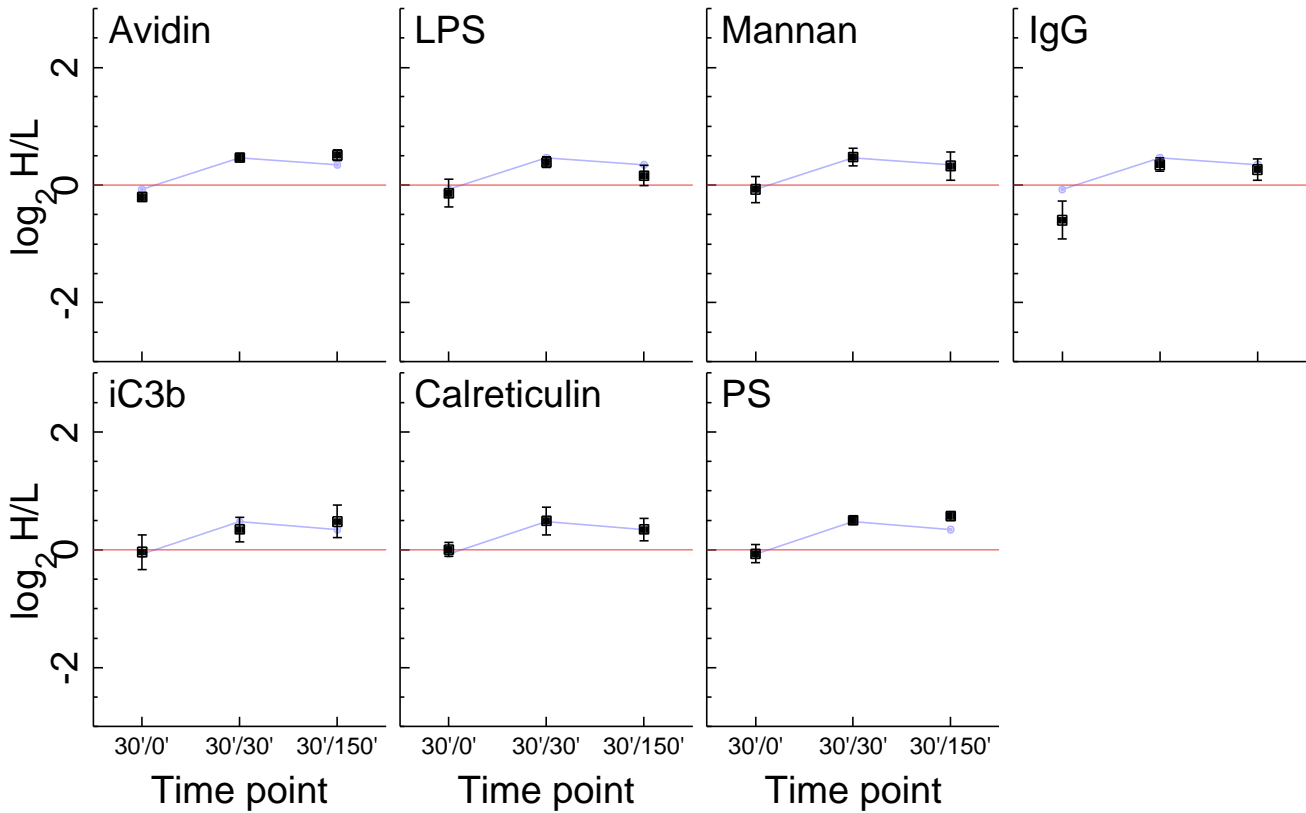

naglu (O88325)

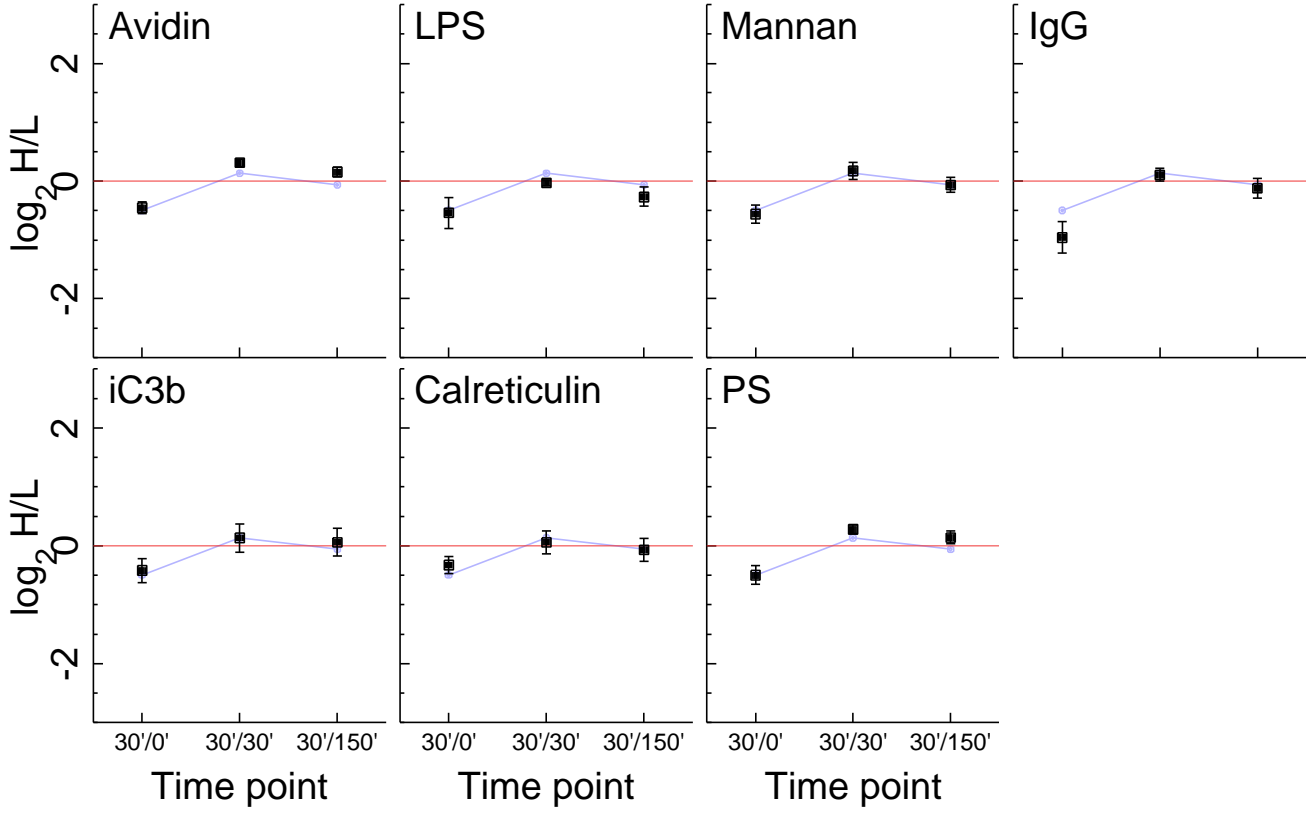

### nagpa (Q8BJ48)

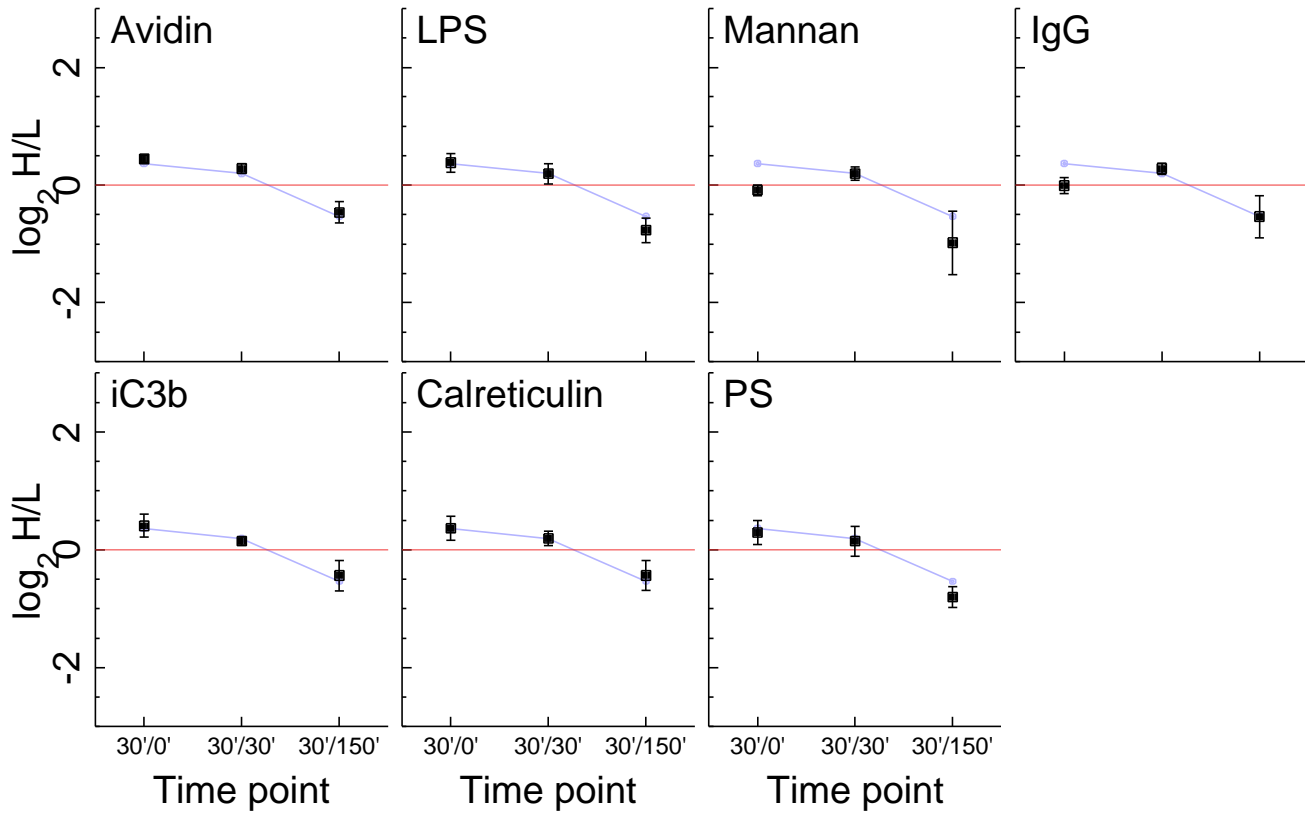

nap111 (E9PW66)

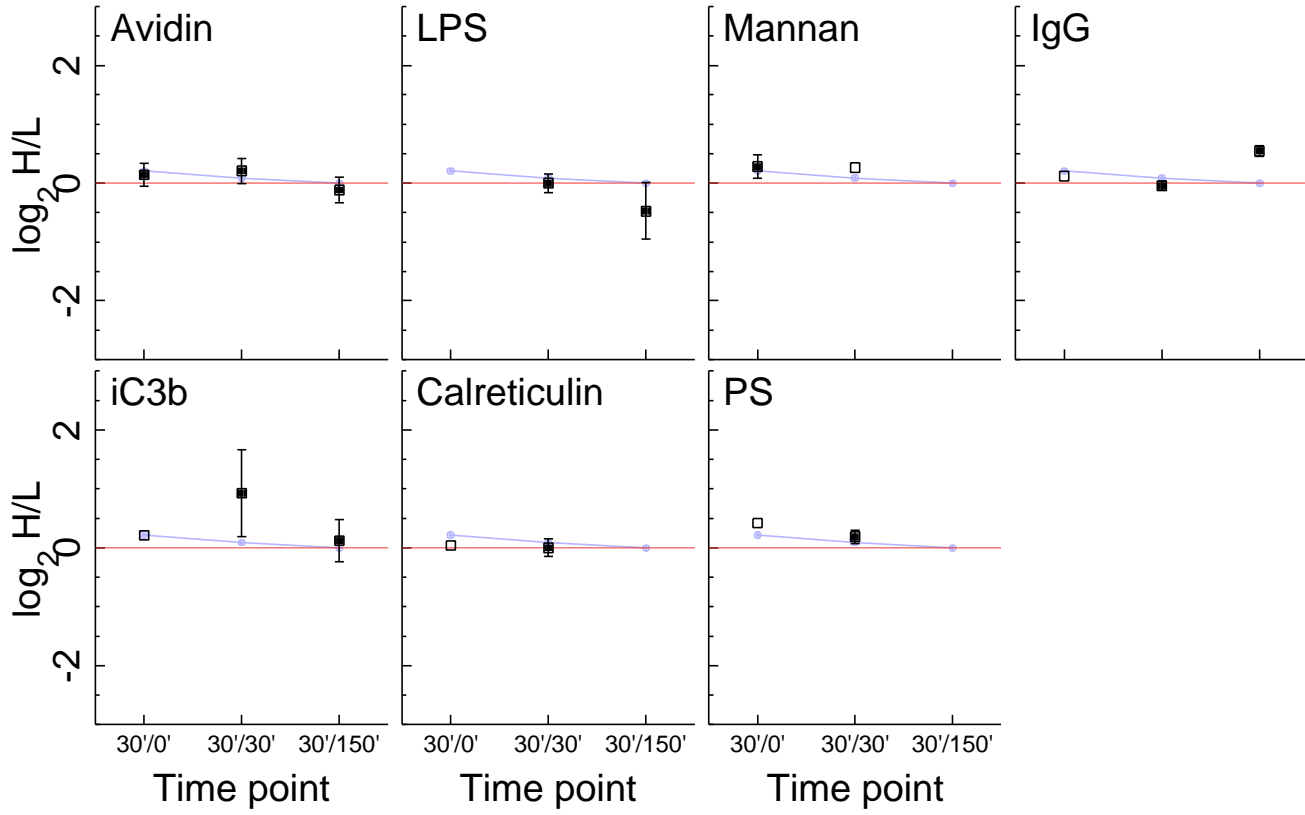

# napa (Q9DB05)

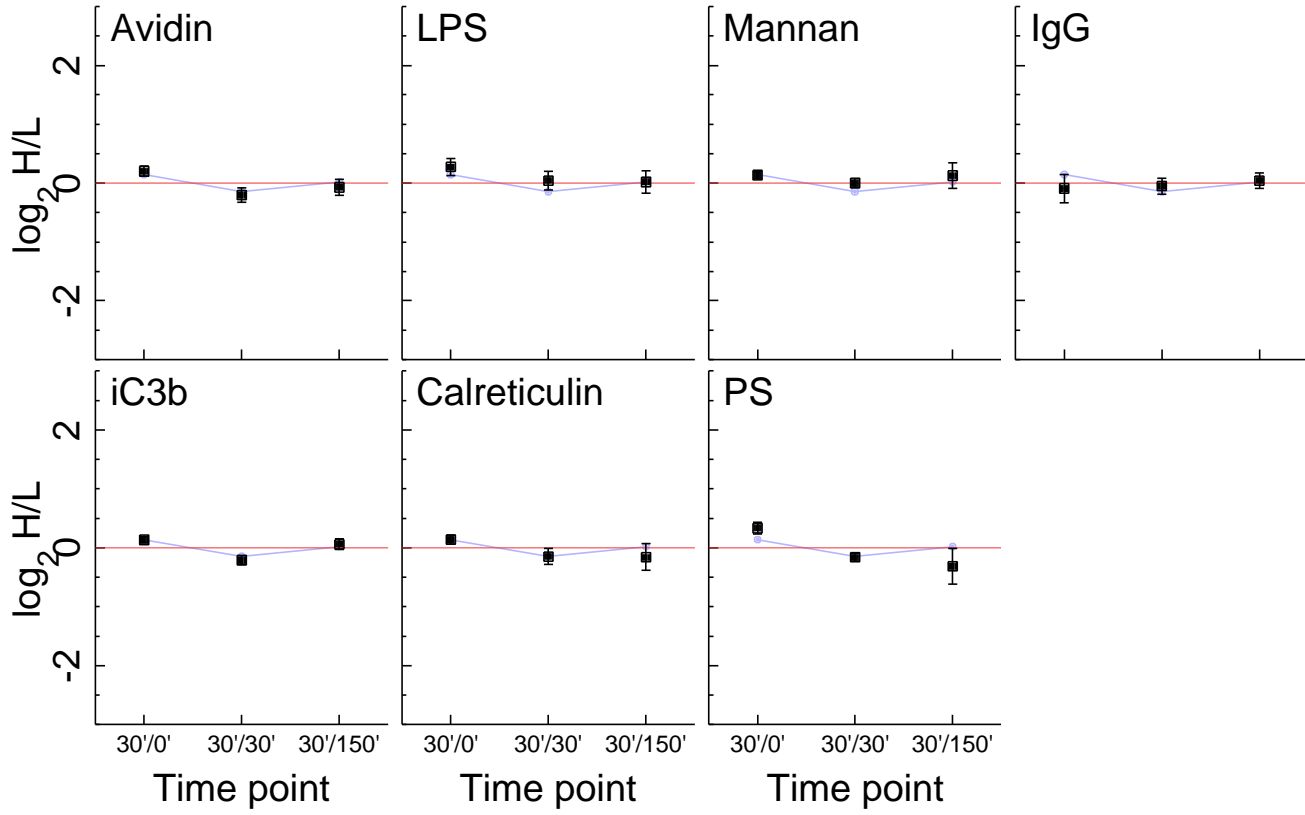

### napg (Q9CWZ7)

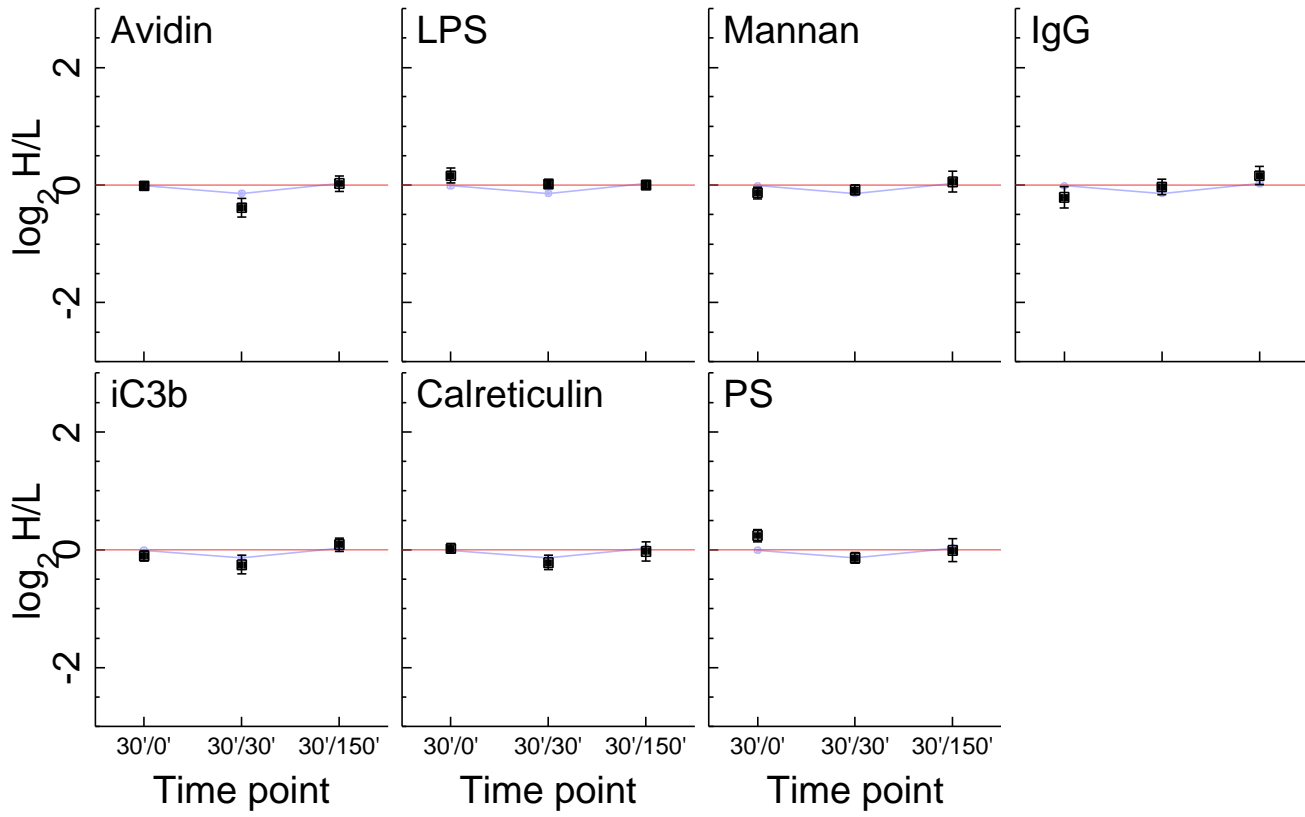

napsa (O09043)

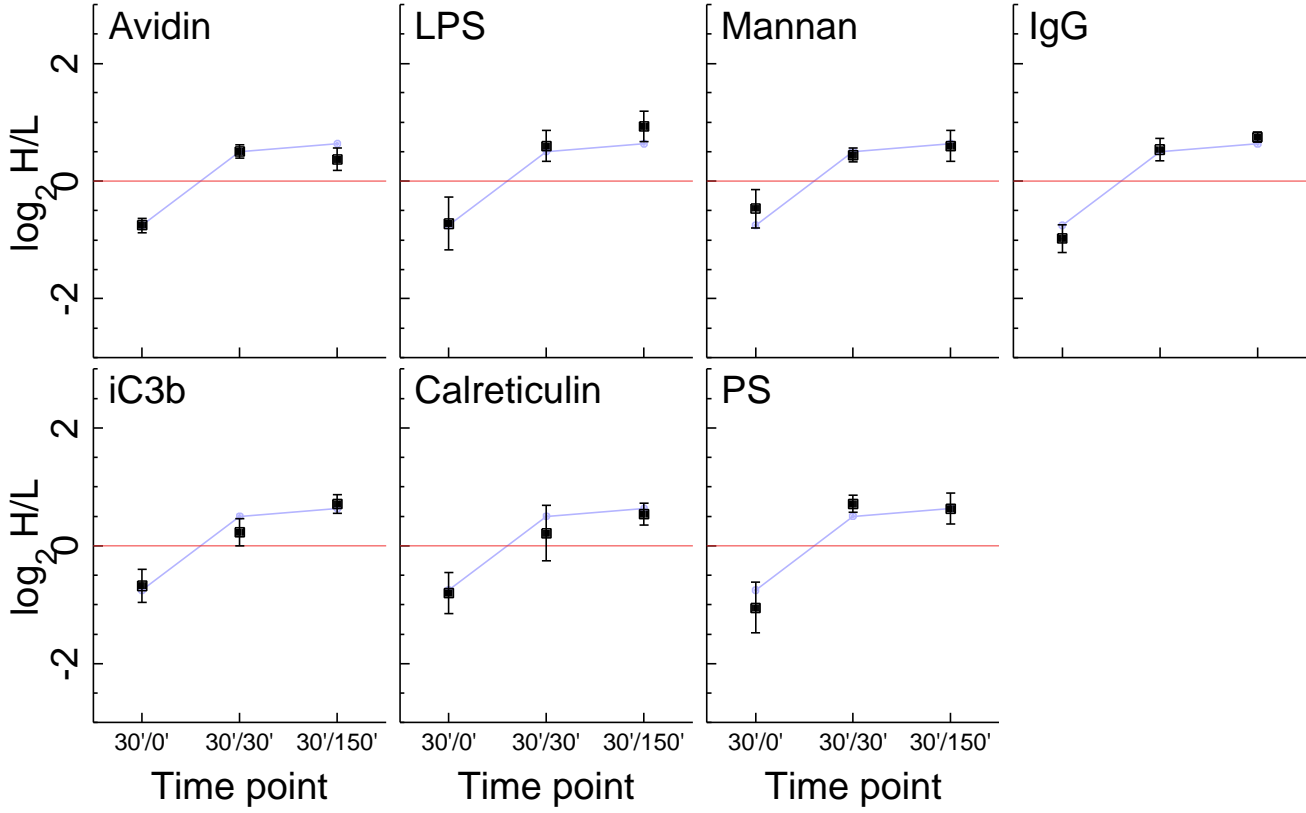



### nceh1 (Q8BLF1)

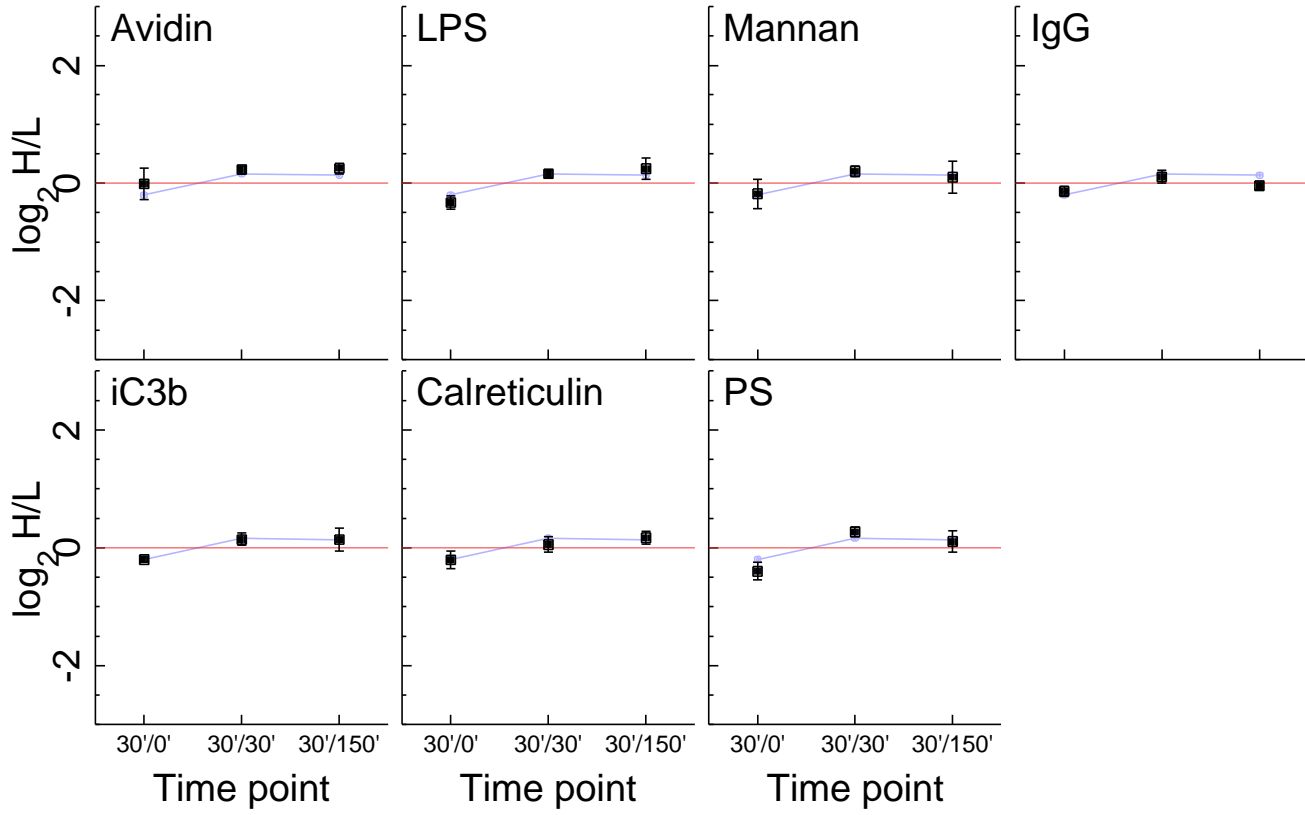

ncf1 (F8WH69)

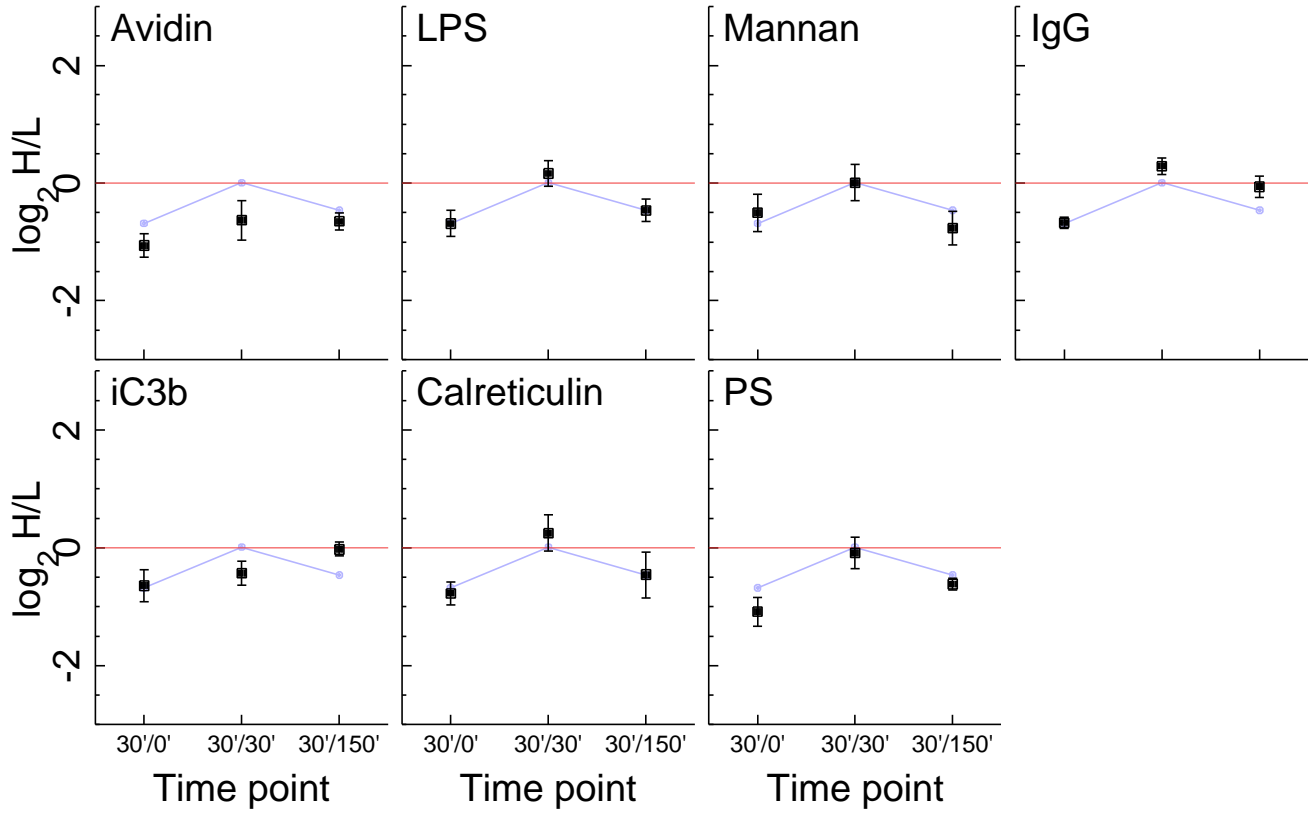

ncf2 (O70145)

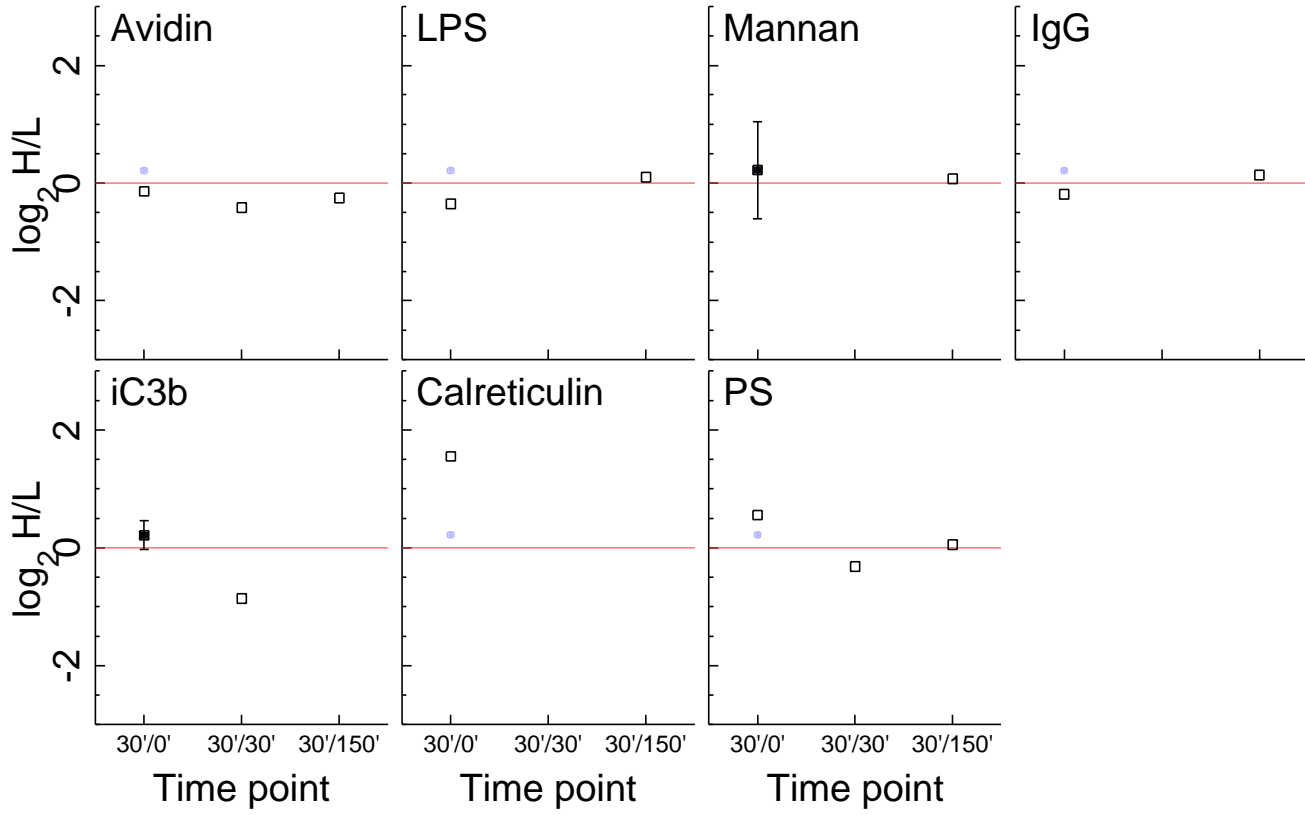

### nckap1l (Q8K1X4)

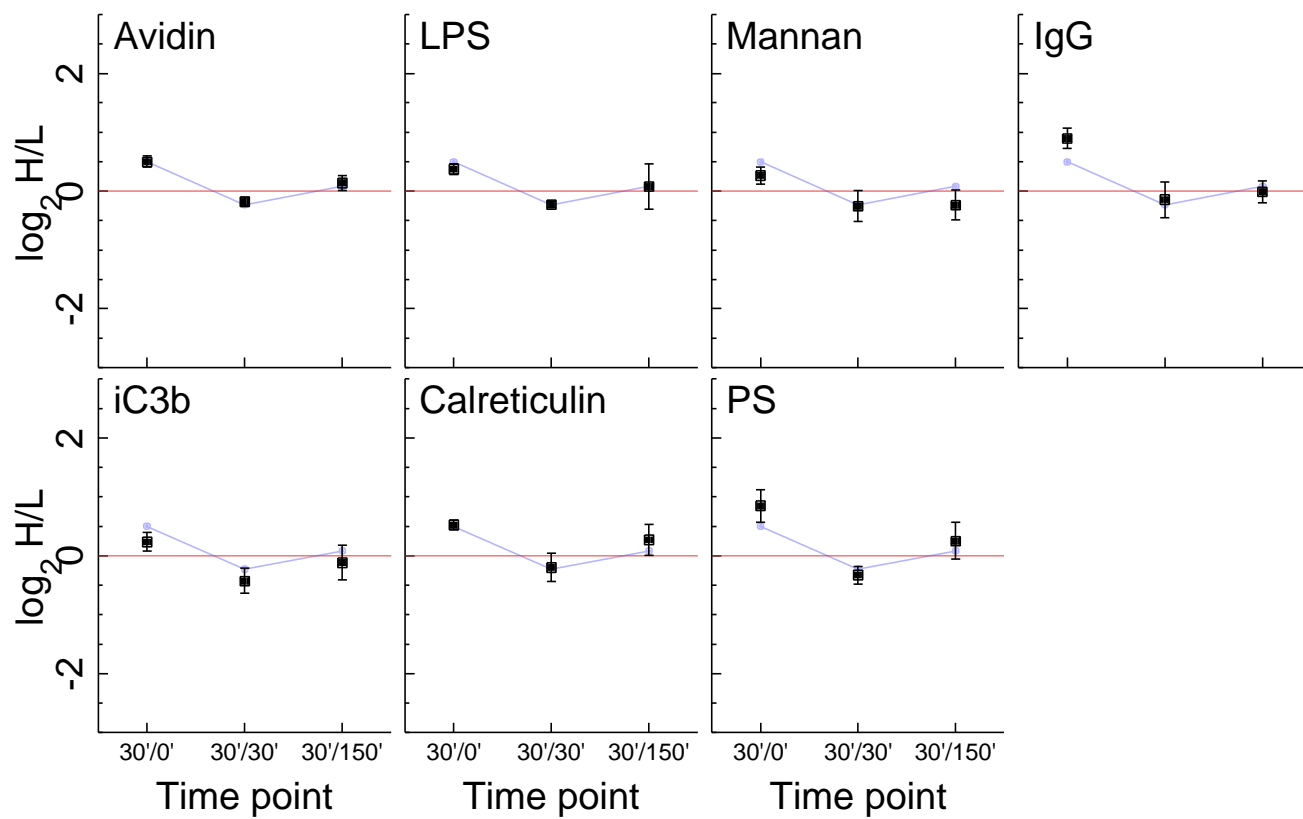

ncl (P09405)

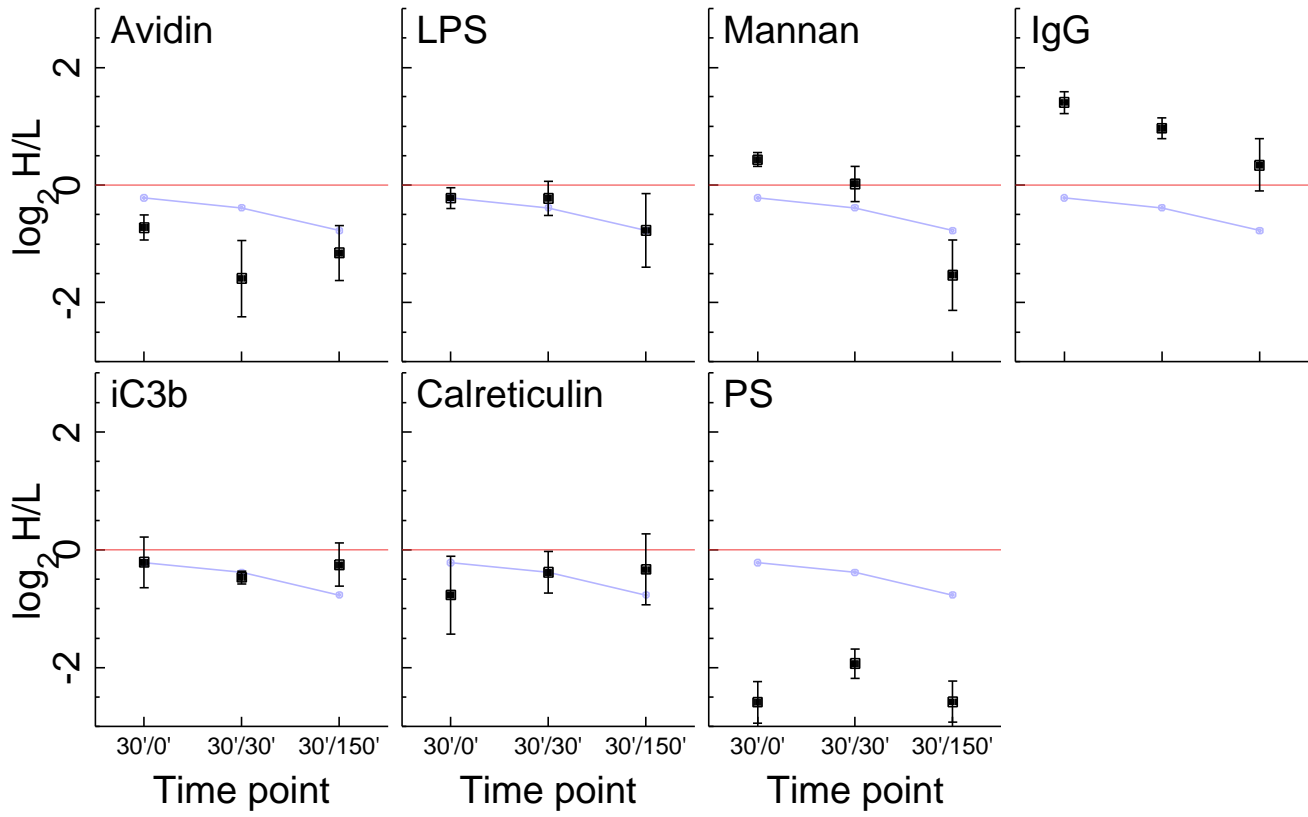

ncoa3 (A2A468)

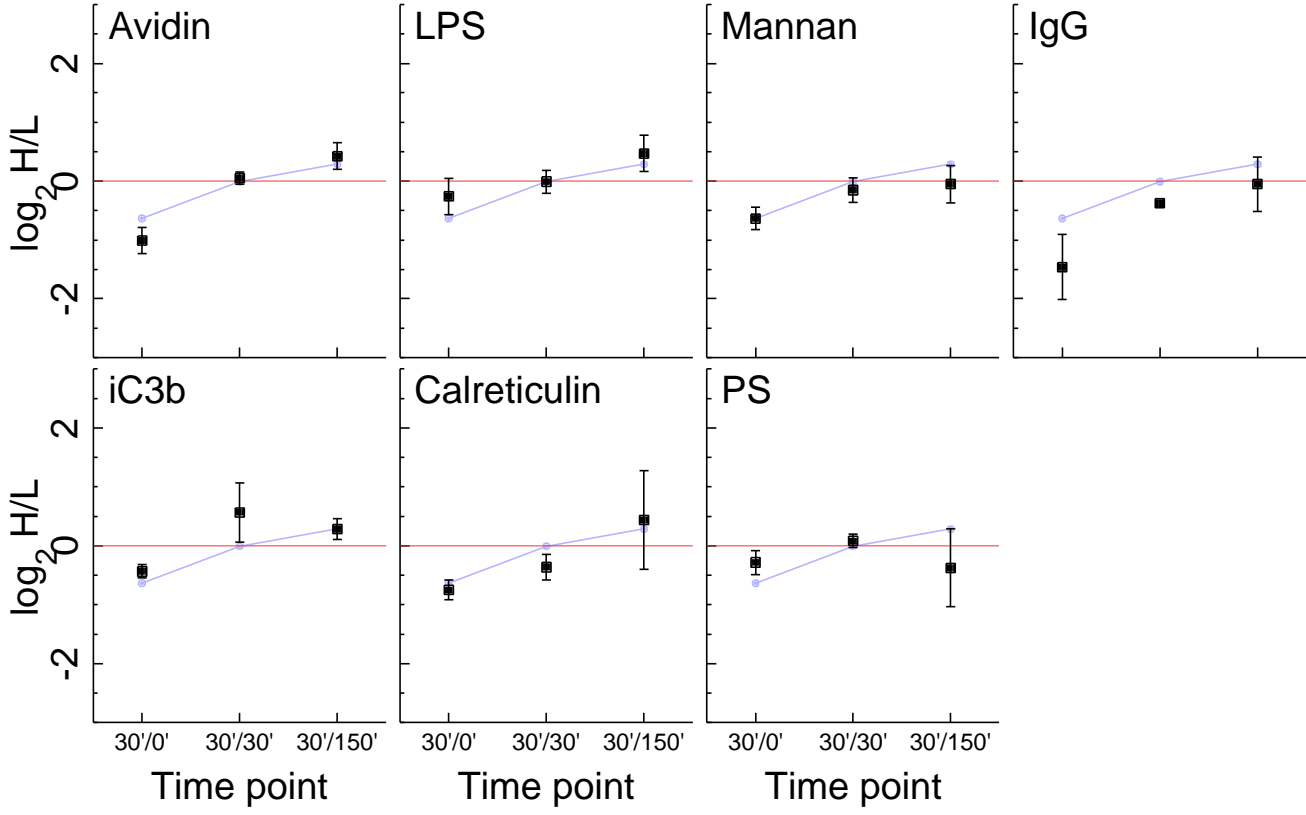

ncor1 (Q5RIM6)

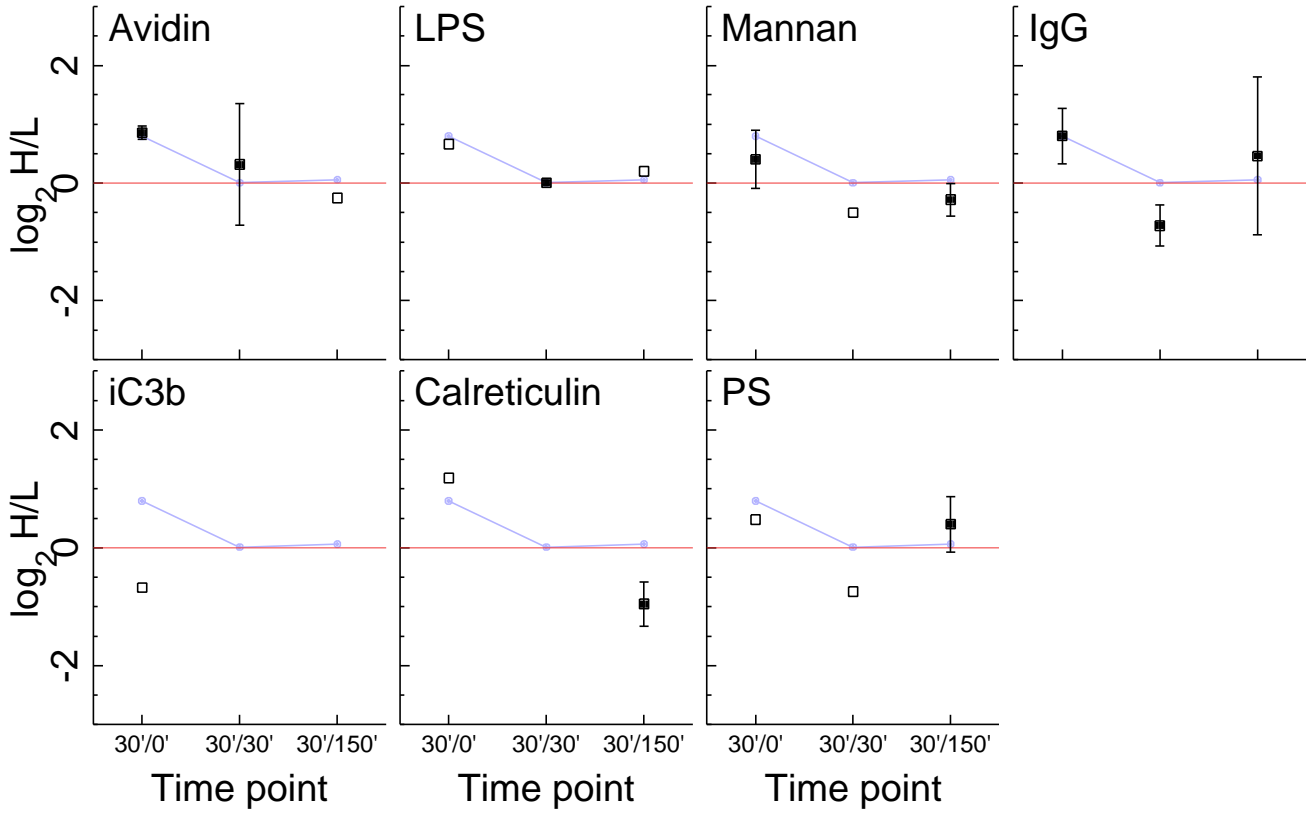

ncstn (P57716)

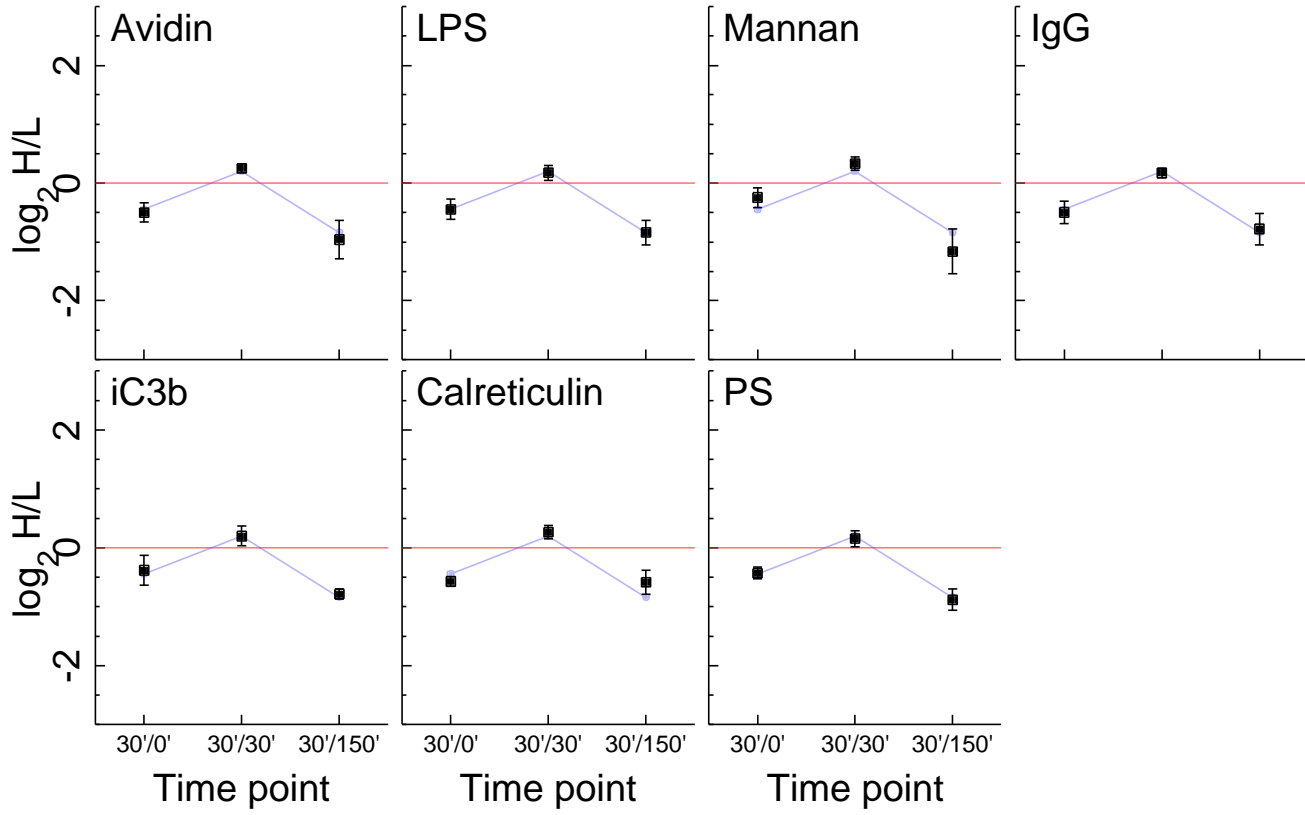



nde1 (Q9CZA6)

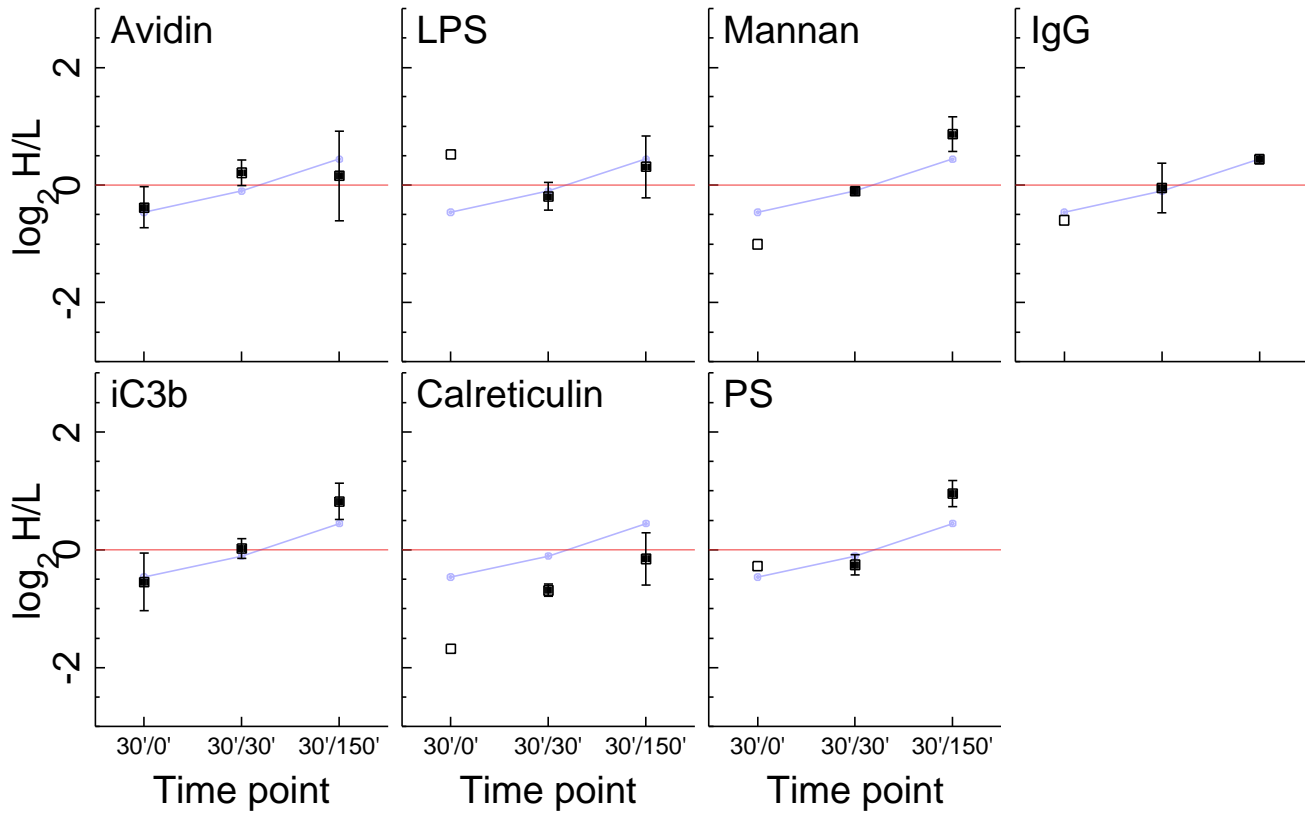

ndufa10 (Q99LC3)

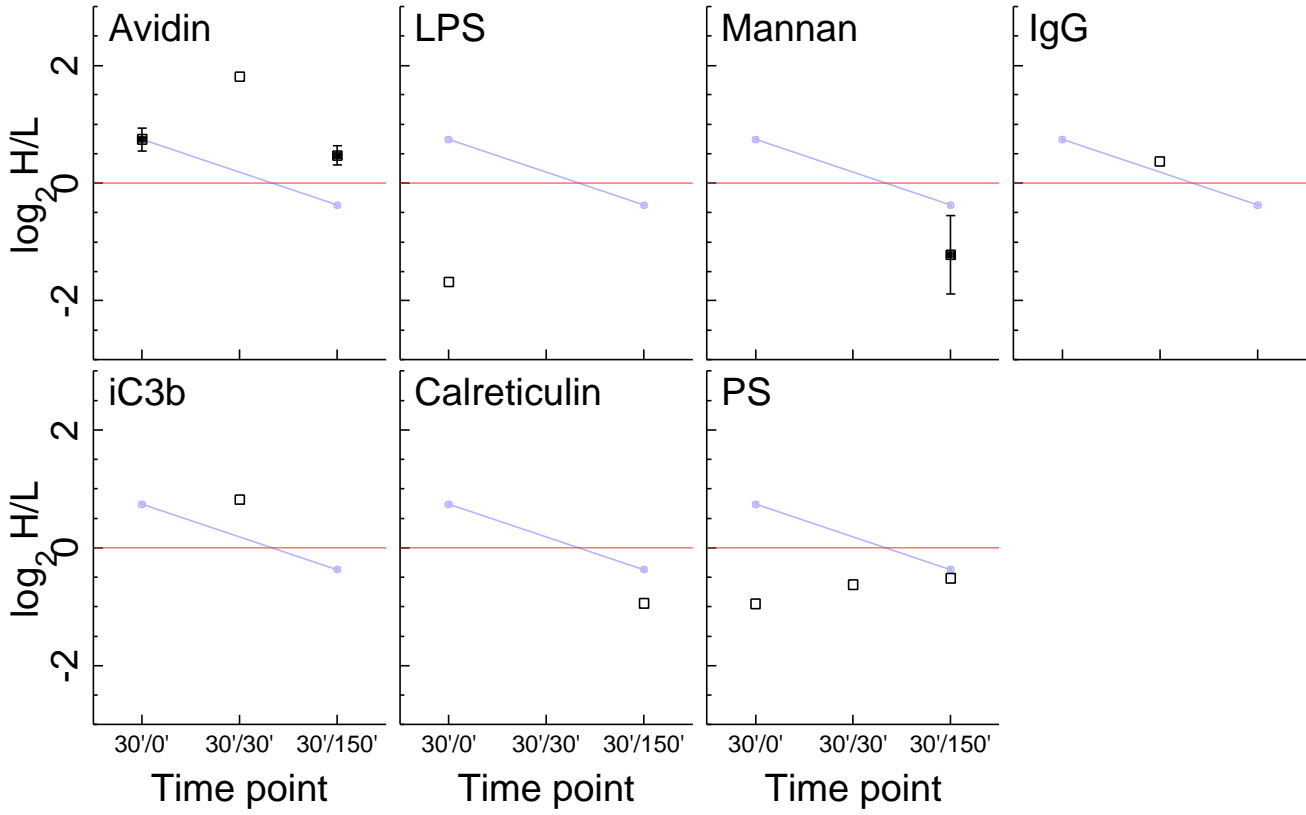

ndufa4 (Q62425)

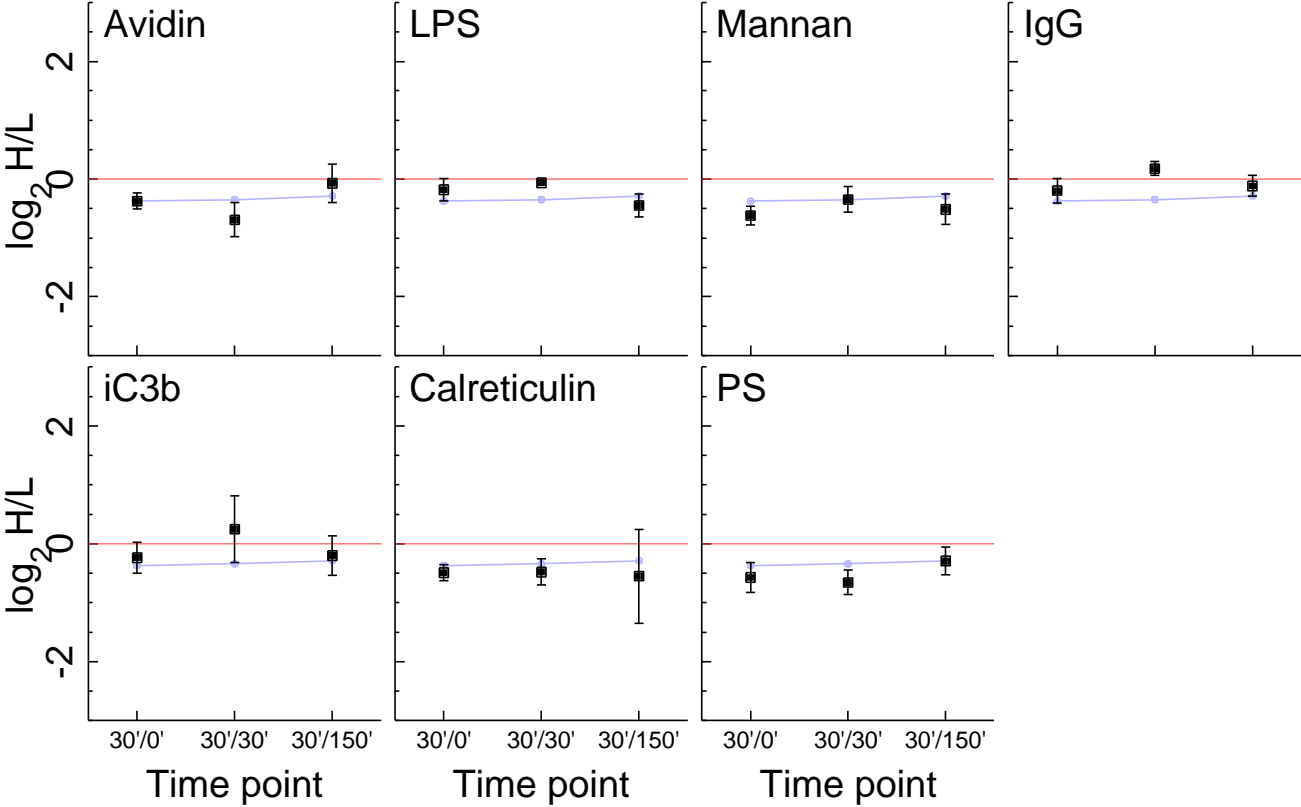

### ndufa6 (Q9CQZ5)

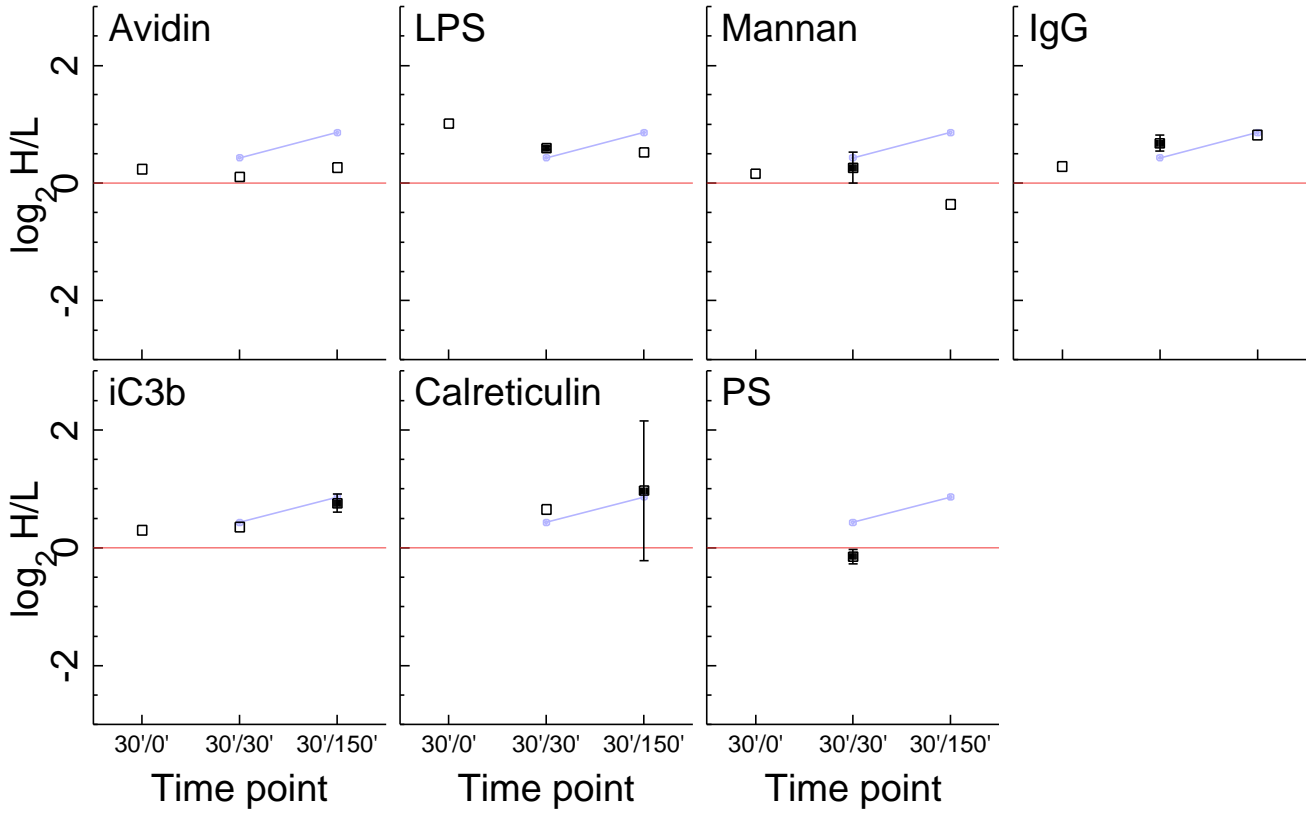

ndufc2 (Q9CQ54)

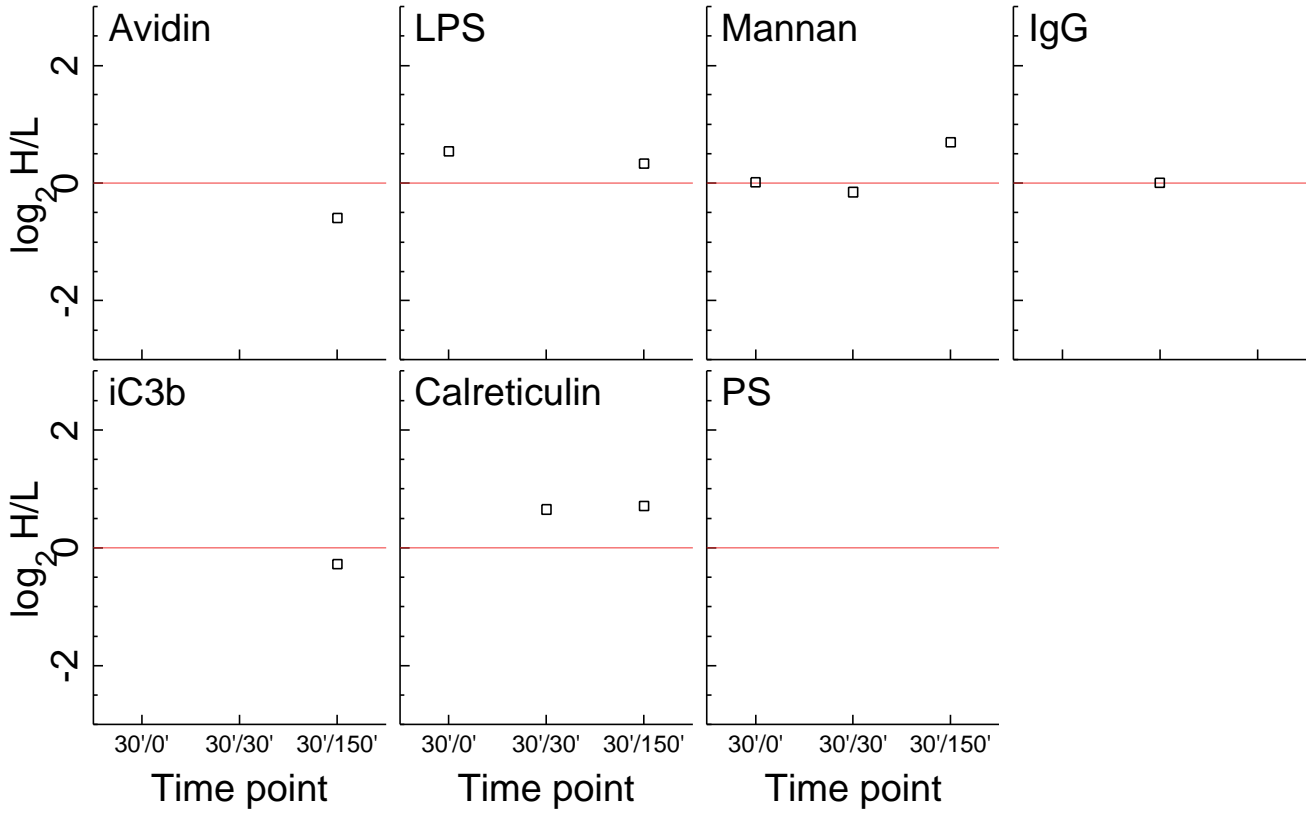

### ndufs1 (Q91VD9)

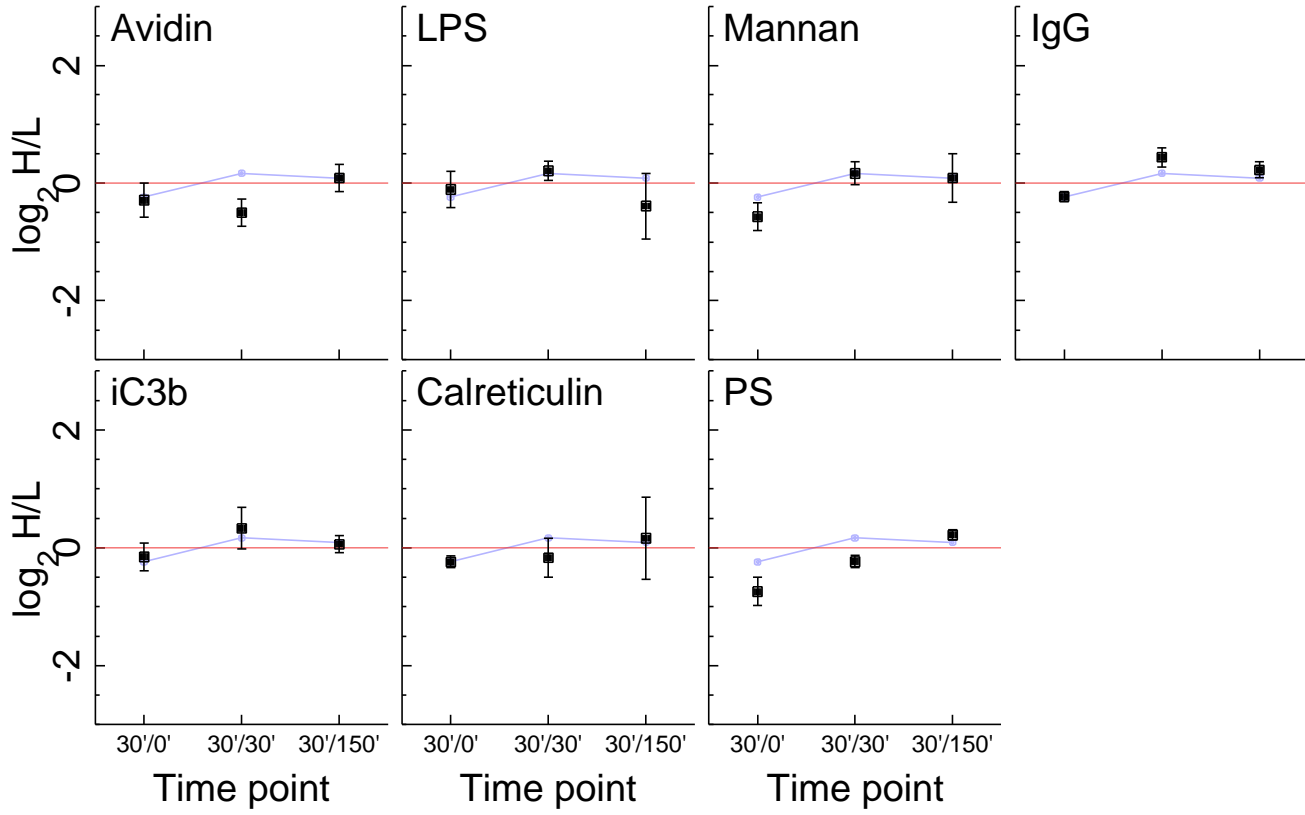

ndufs2 (Q91WD5)

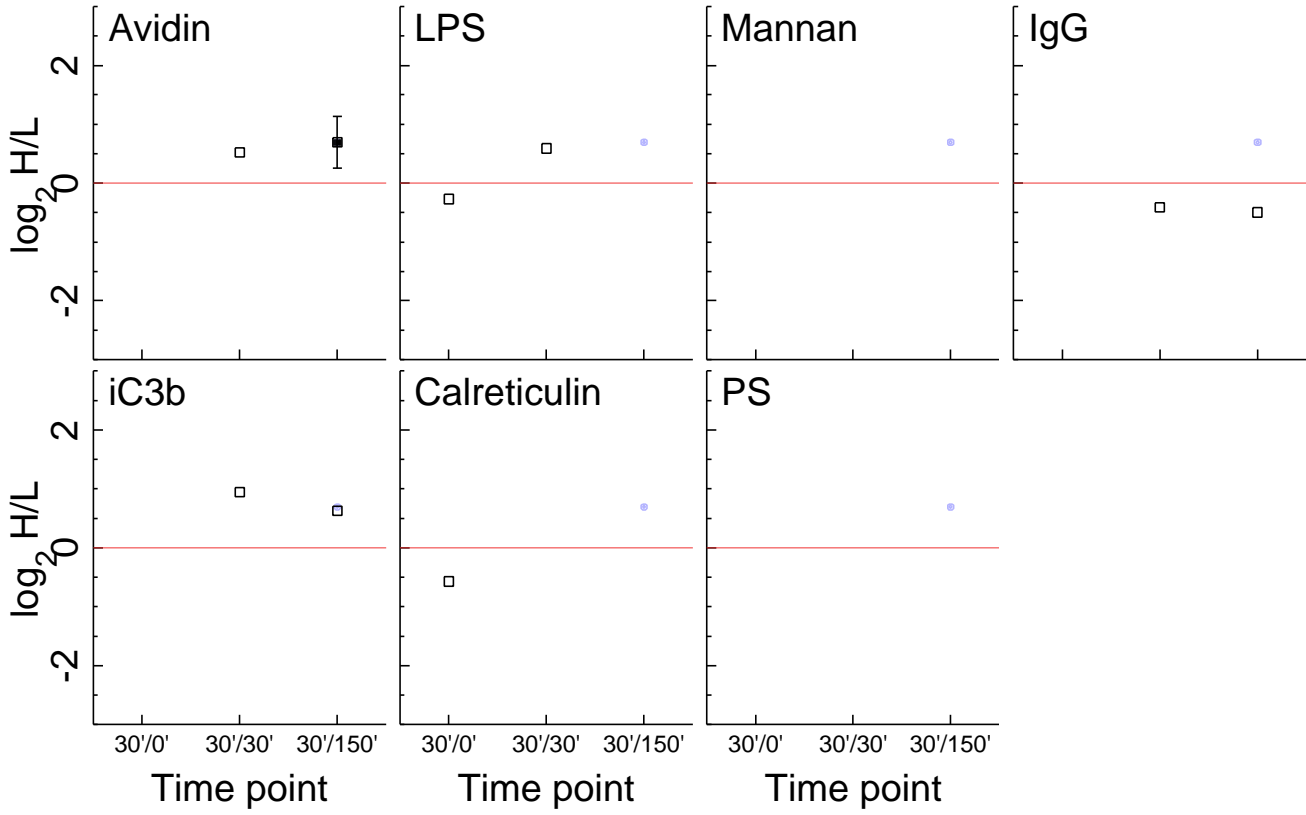

### ndufs3 (Q9DCT2)

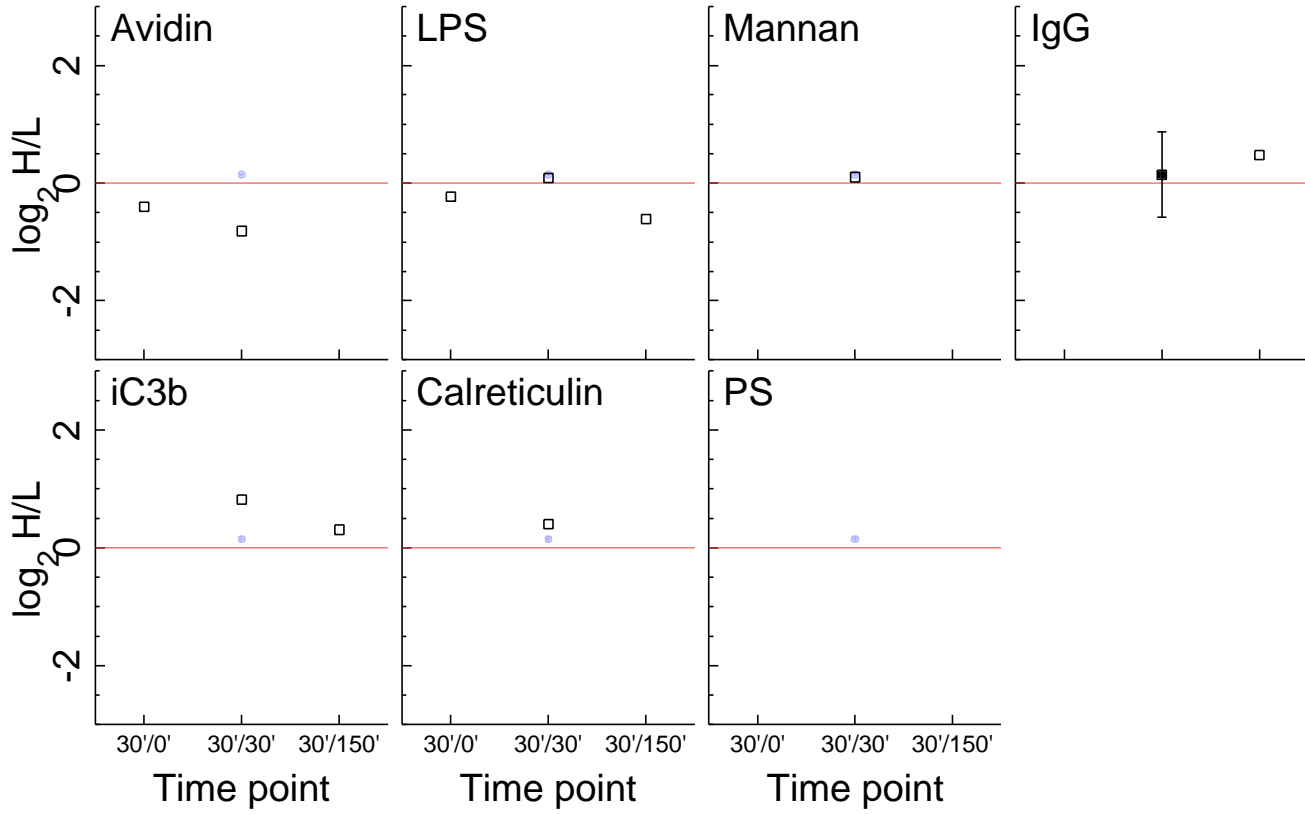



ndufv1 (Q91YT0)

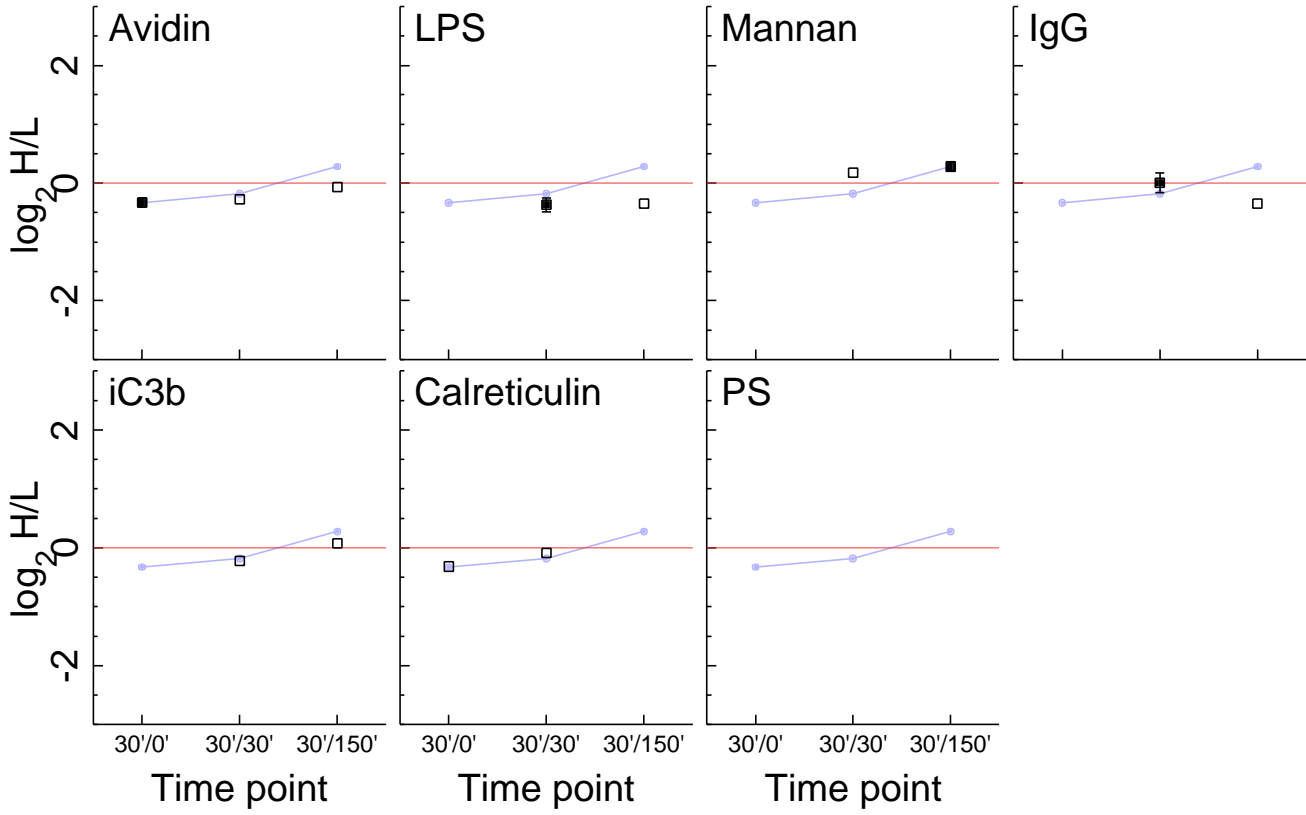

ndufv2 (Q9D6J6)

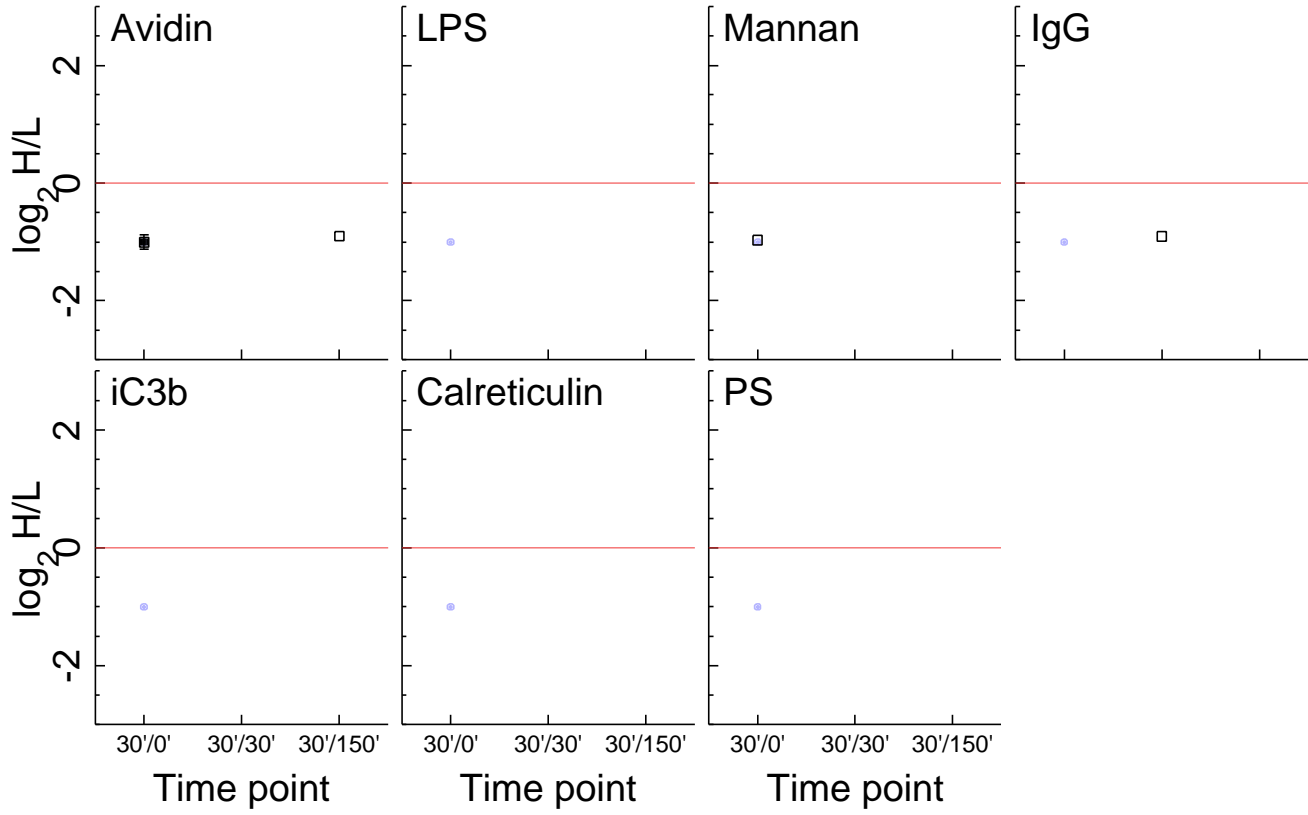

neb (E9Q1W3)

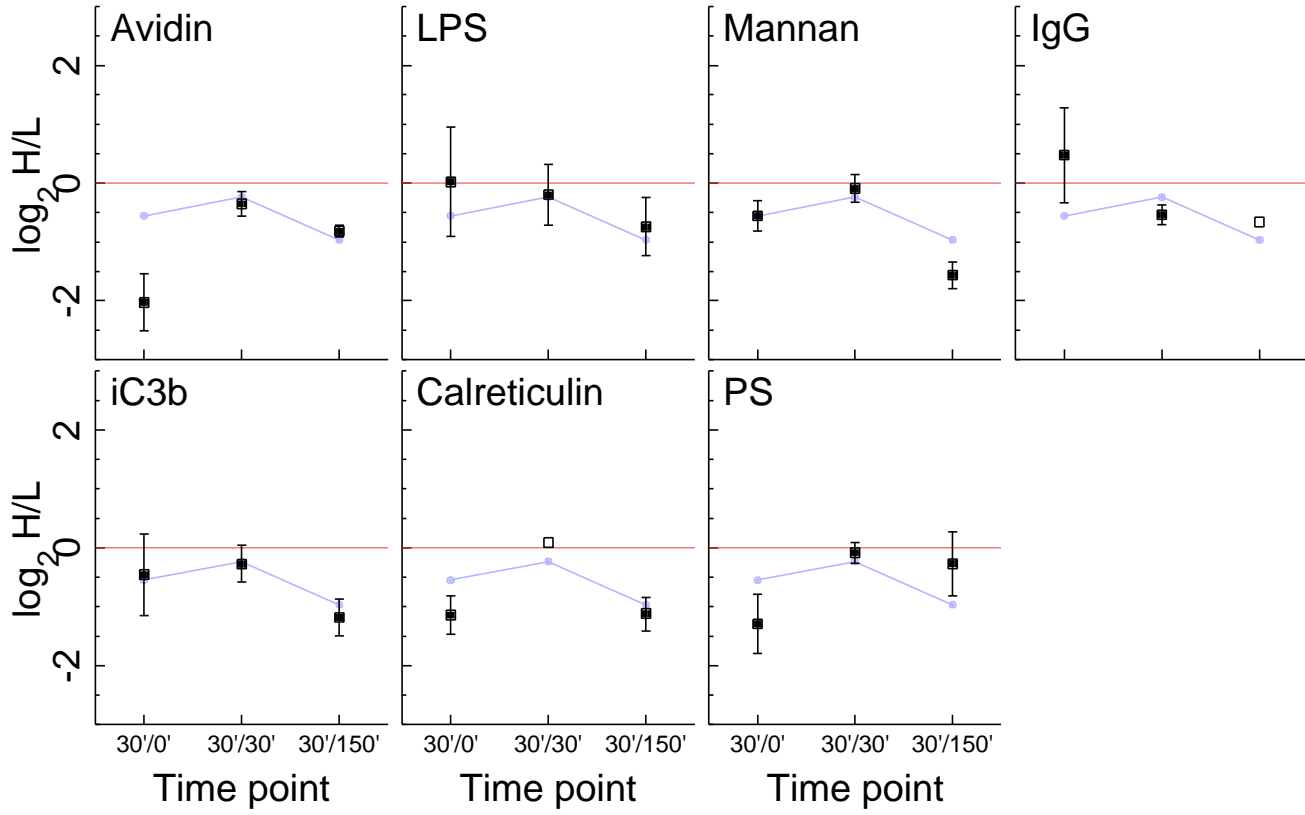

# necap2 (Q9D1J1)

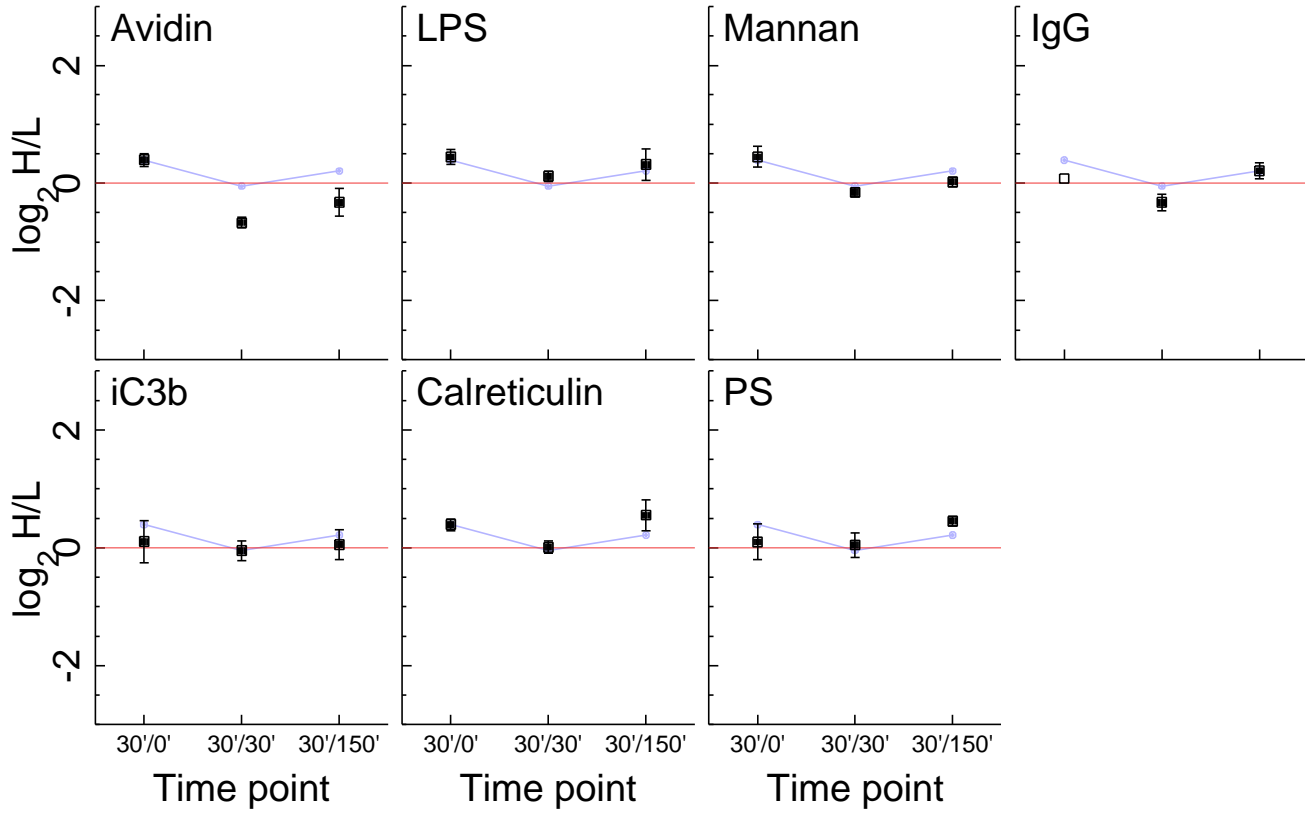

### nek2 (O35942)

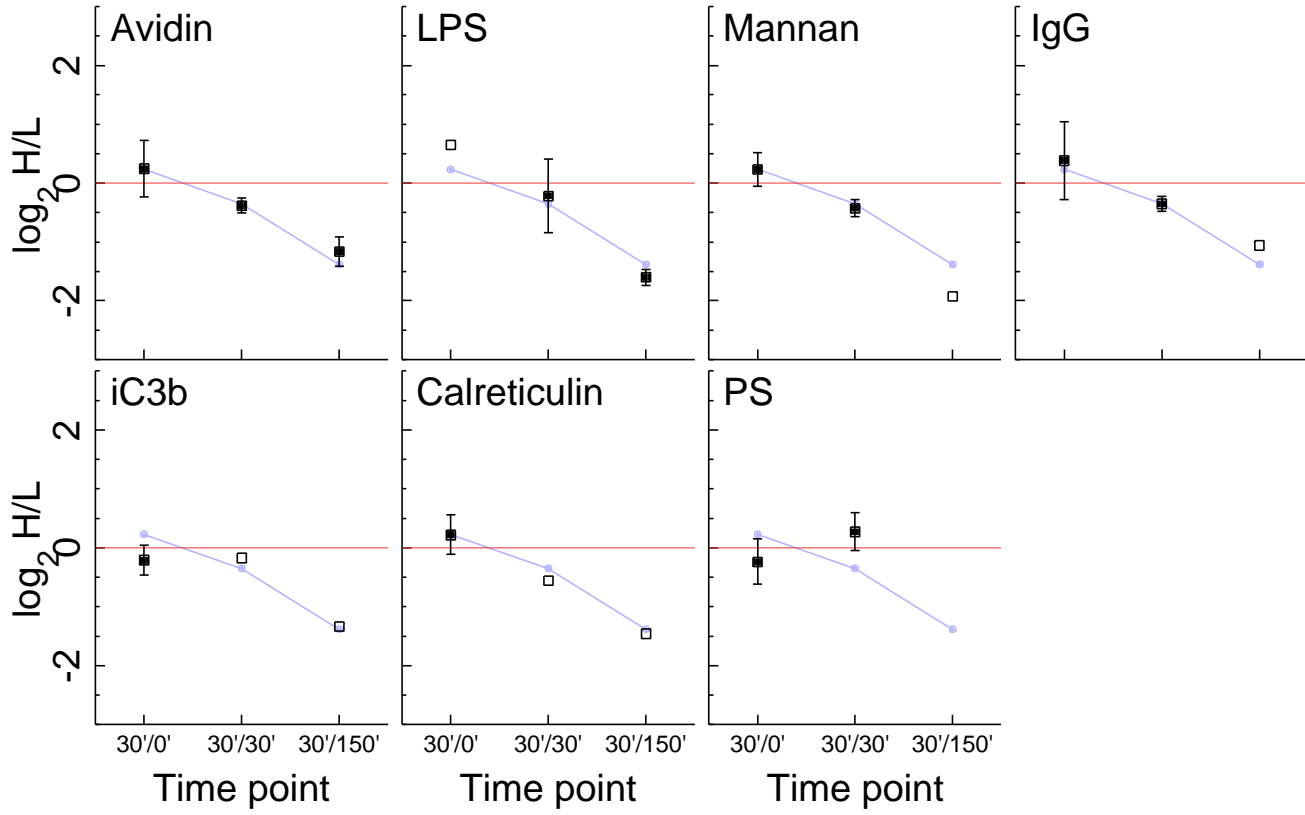

### neu1 (O35657)

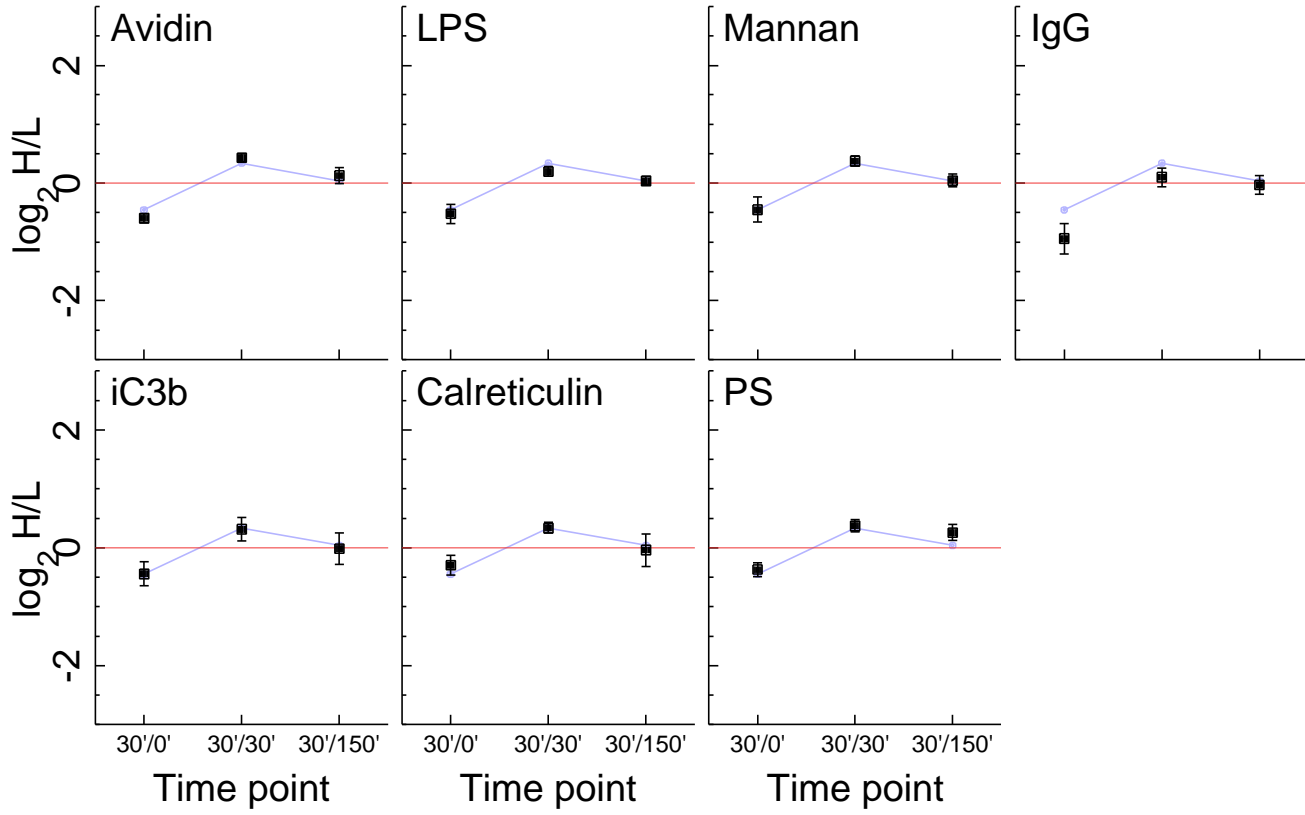

nfam1 (Q8R4V1)

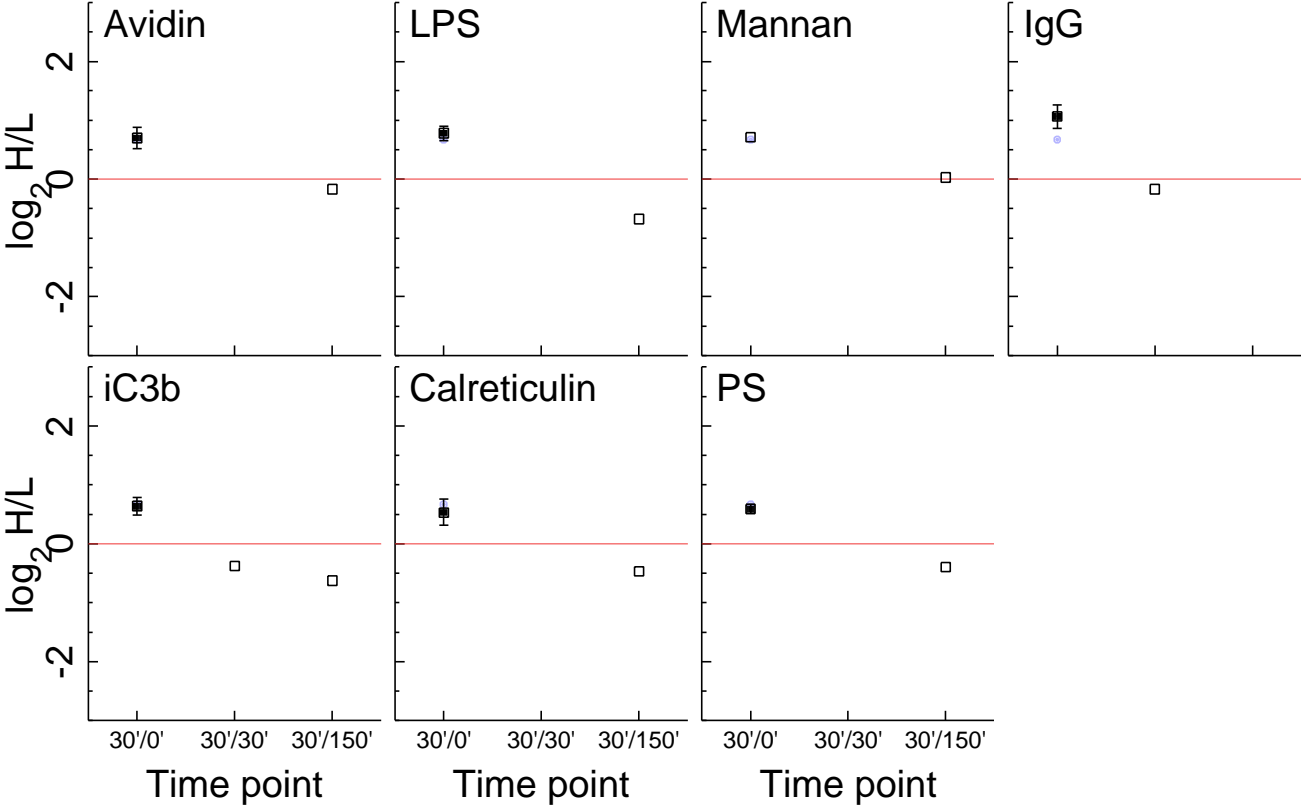

nfatc2ip (O09130)

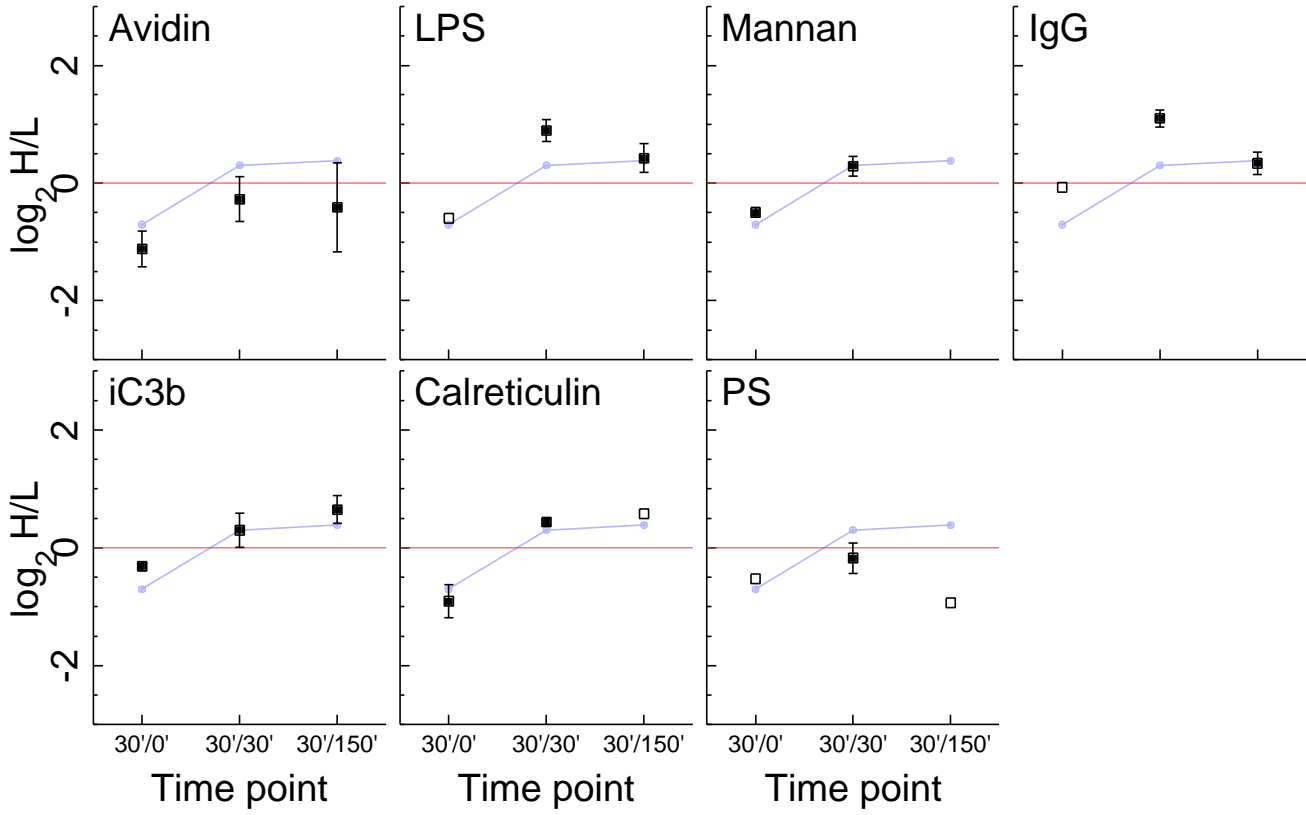



### nhlrc3 (Q8CCH2)

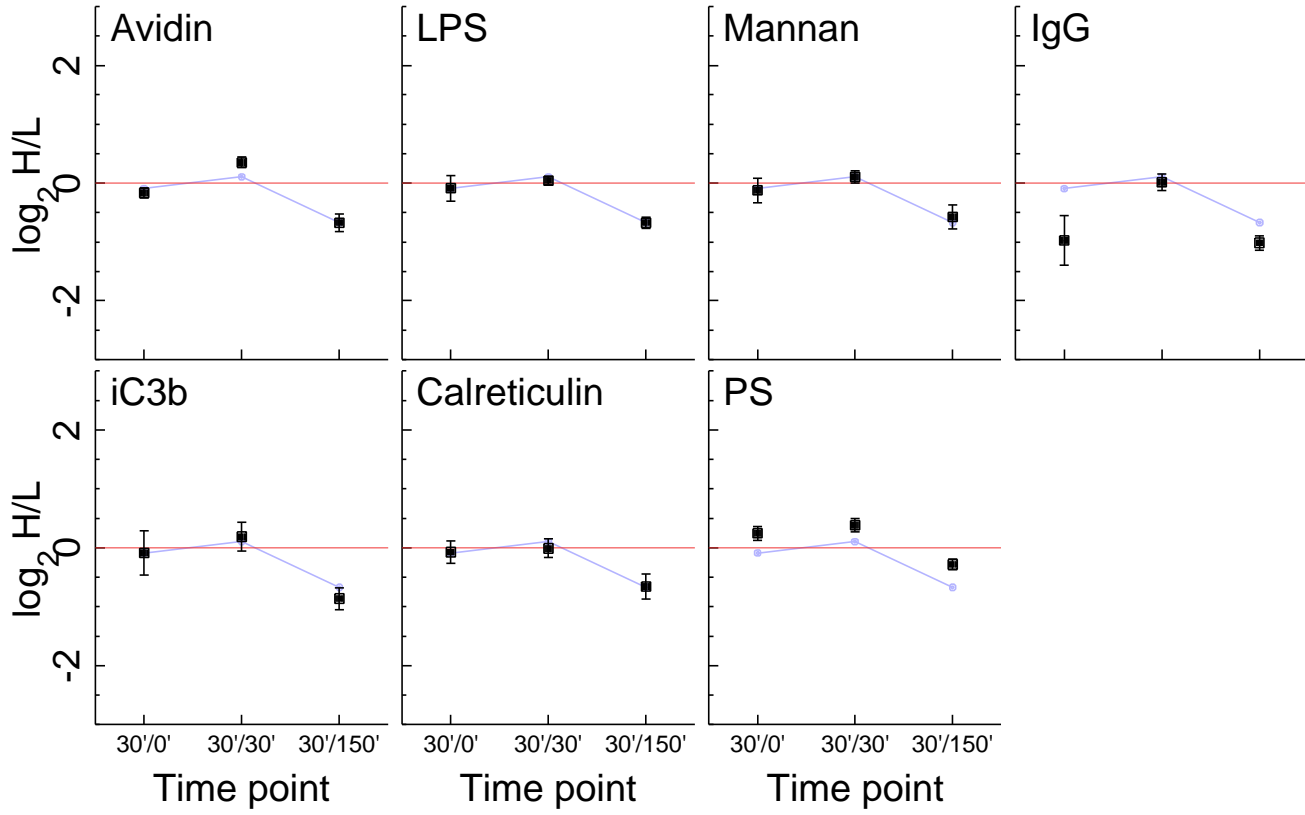

### nhp2l1 (Q9D0T1)

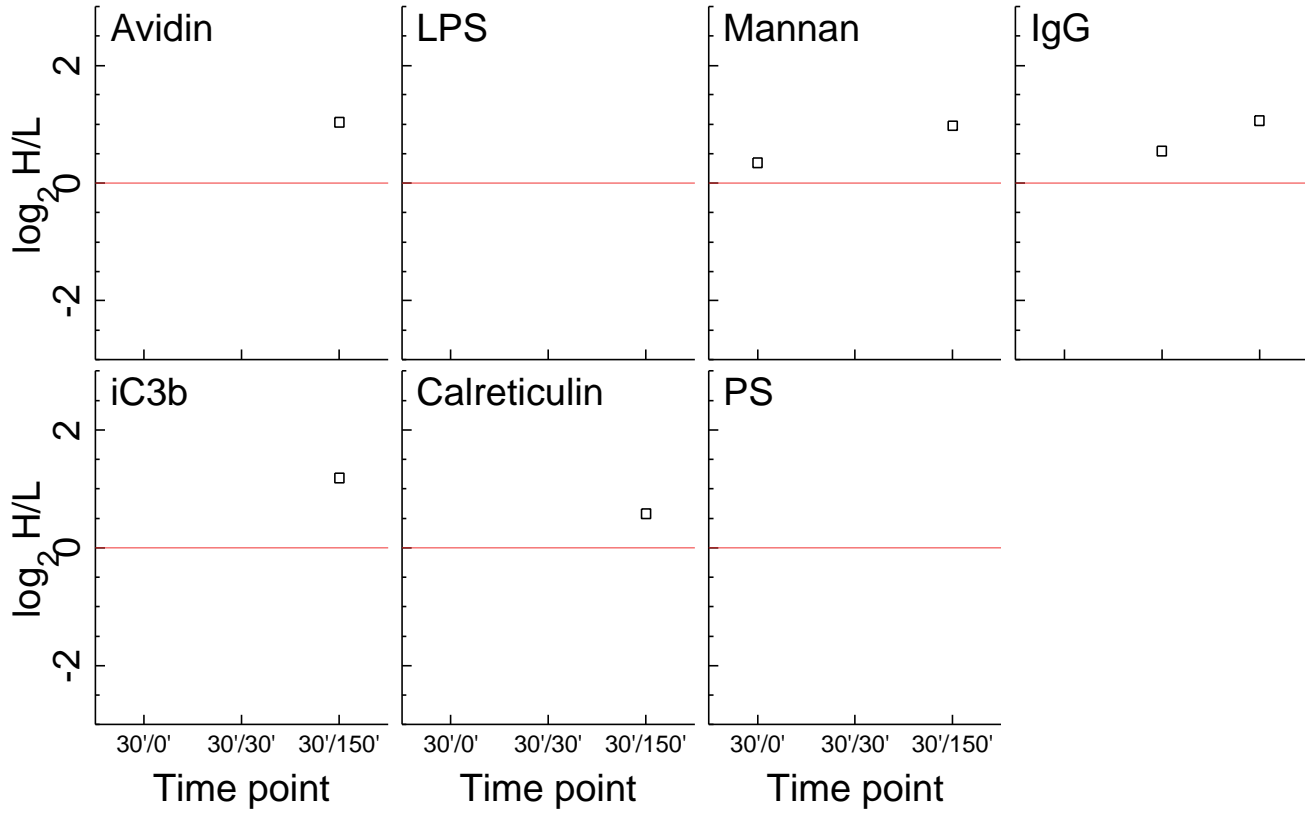

### nhs12 (E9Q0V6)

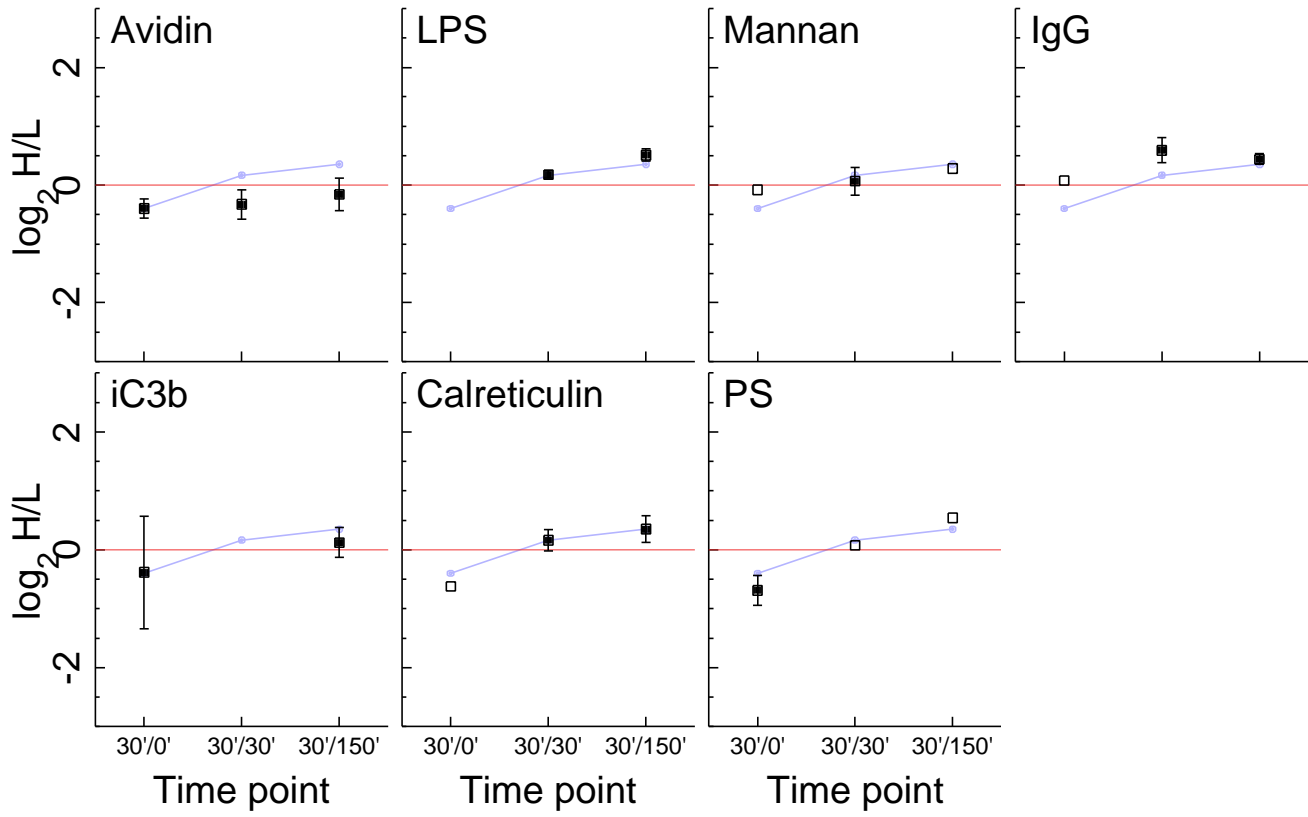

nin (E9Q4S3)

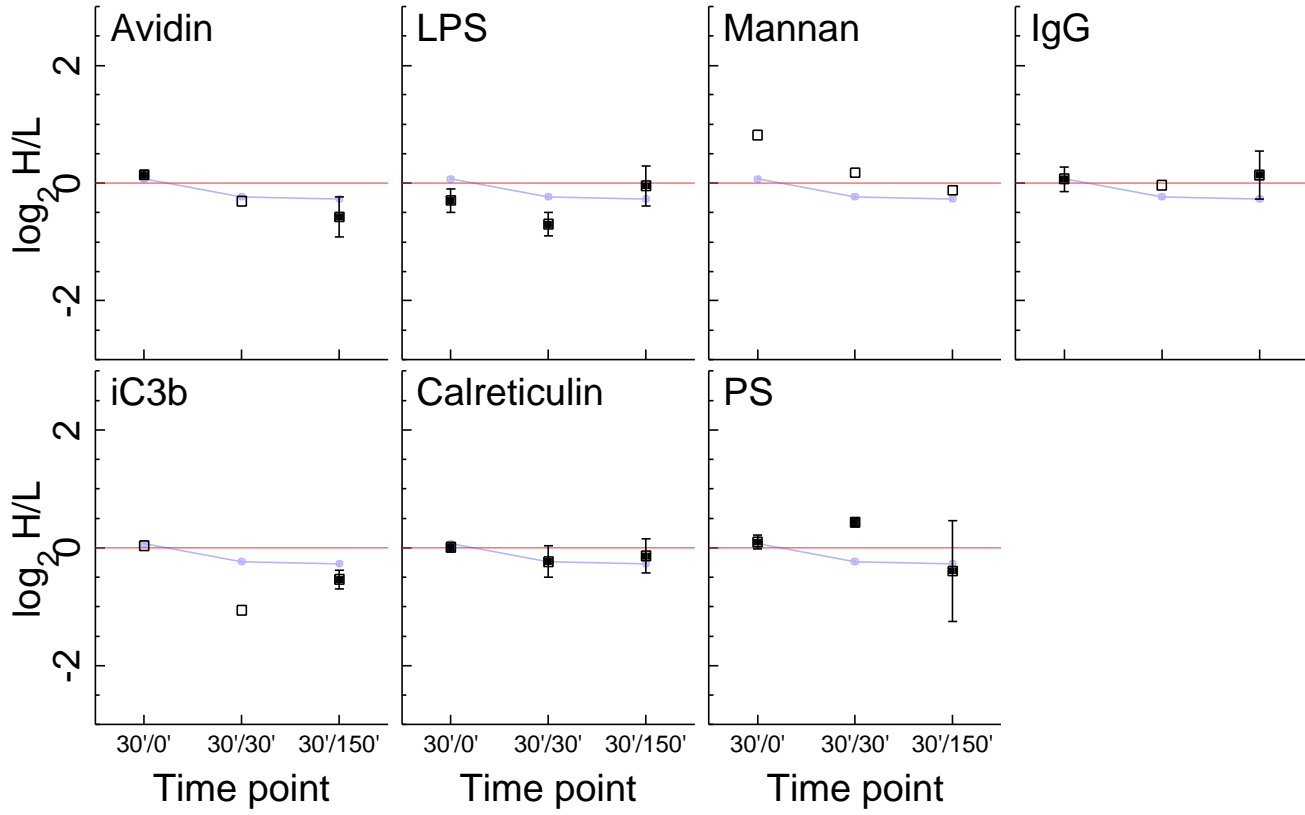

nipsnap3b (Q9CQE1)

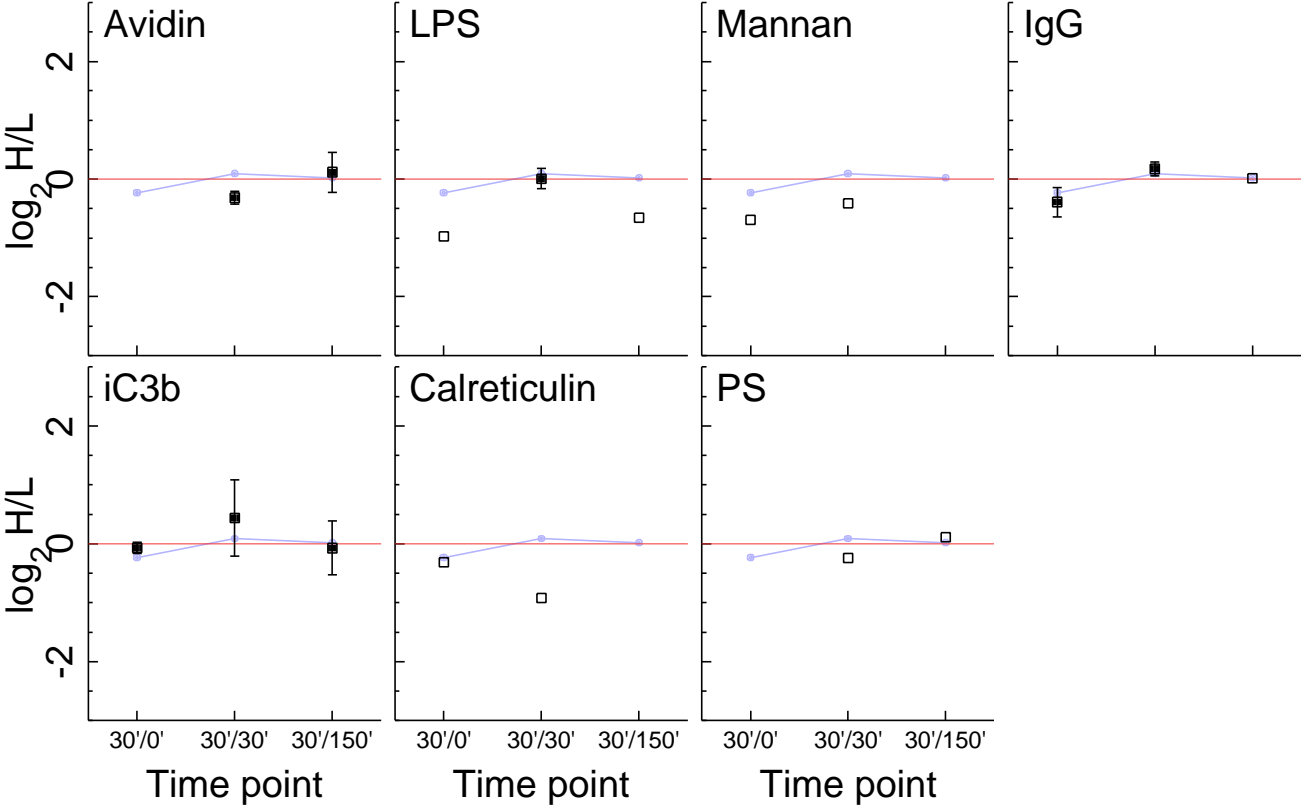

nisch (Q80TM9)

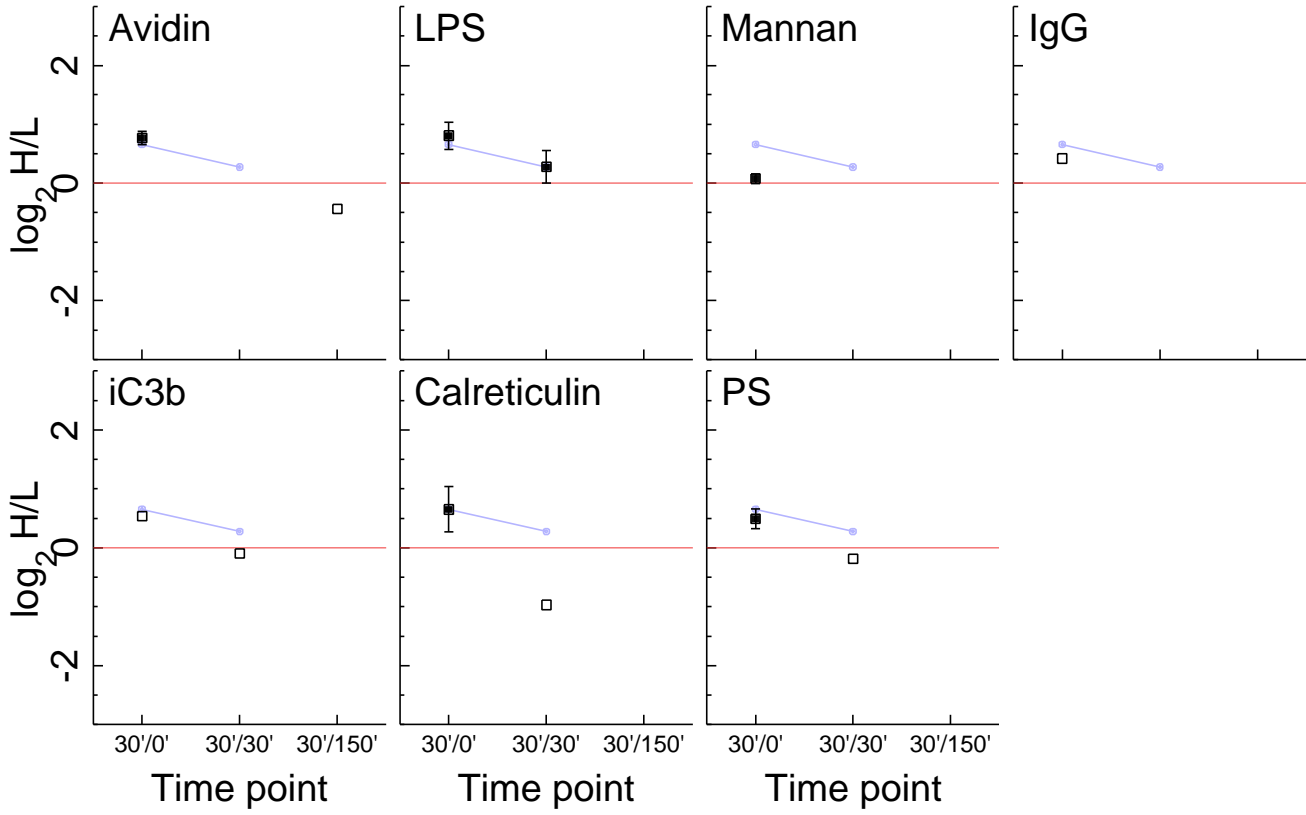

nmt1 (O70310)

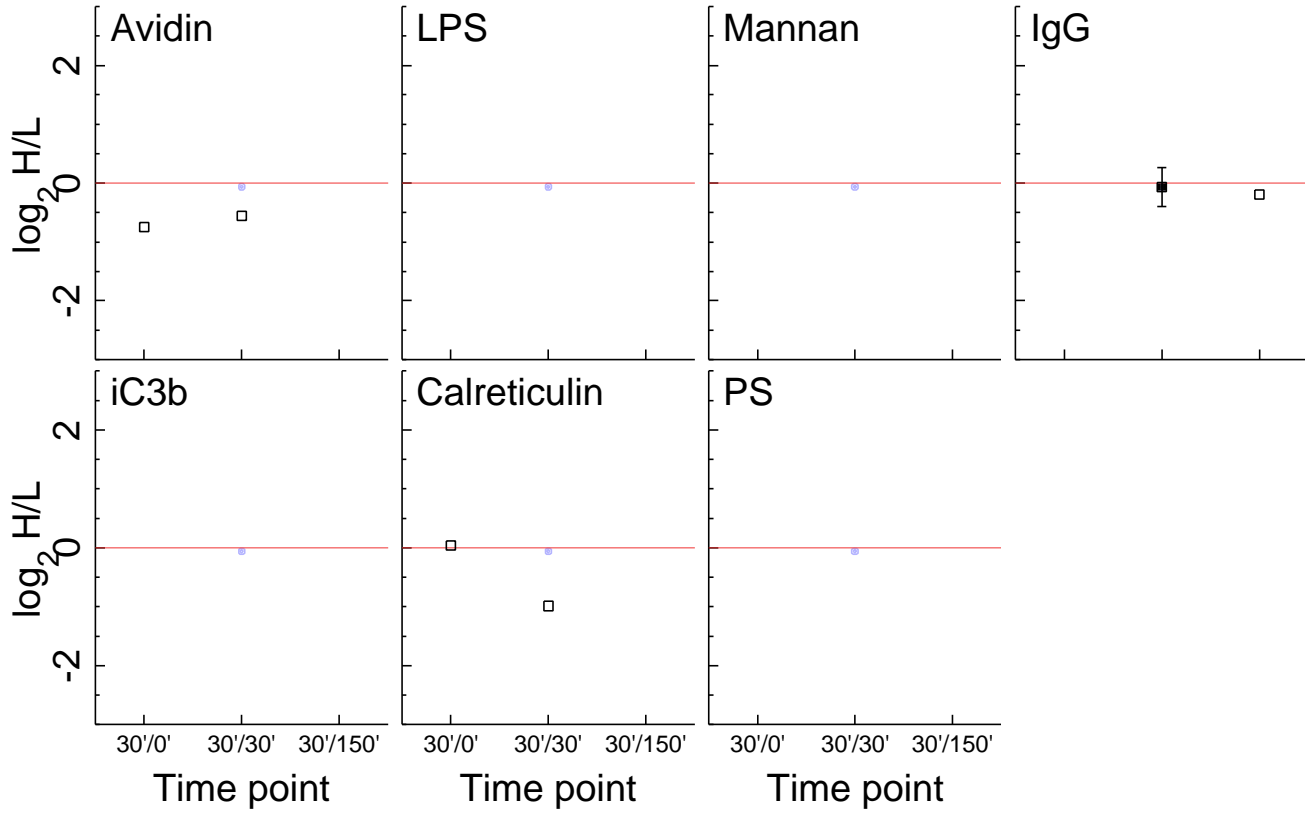

nob1 (Q8BW10)

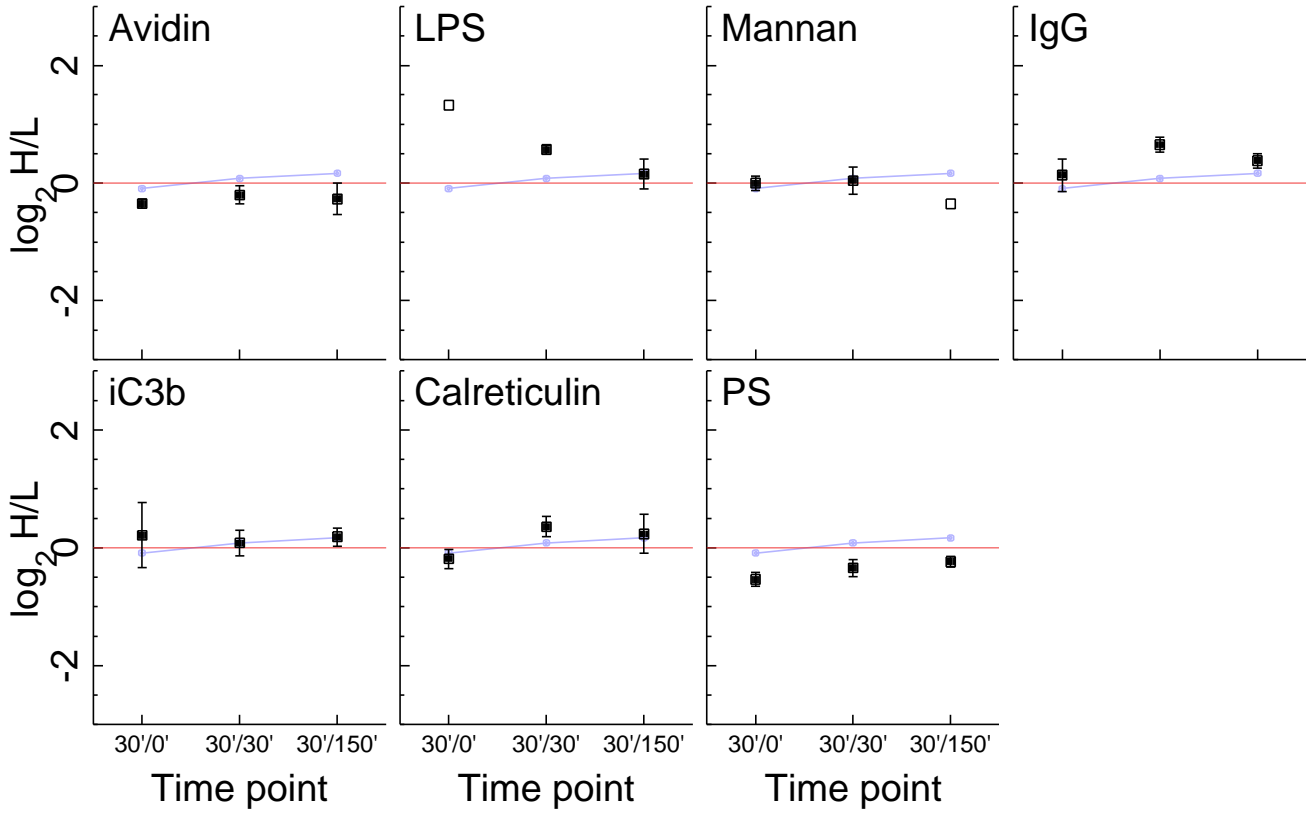



nomo1 (Q6GQT9)

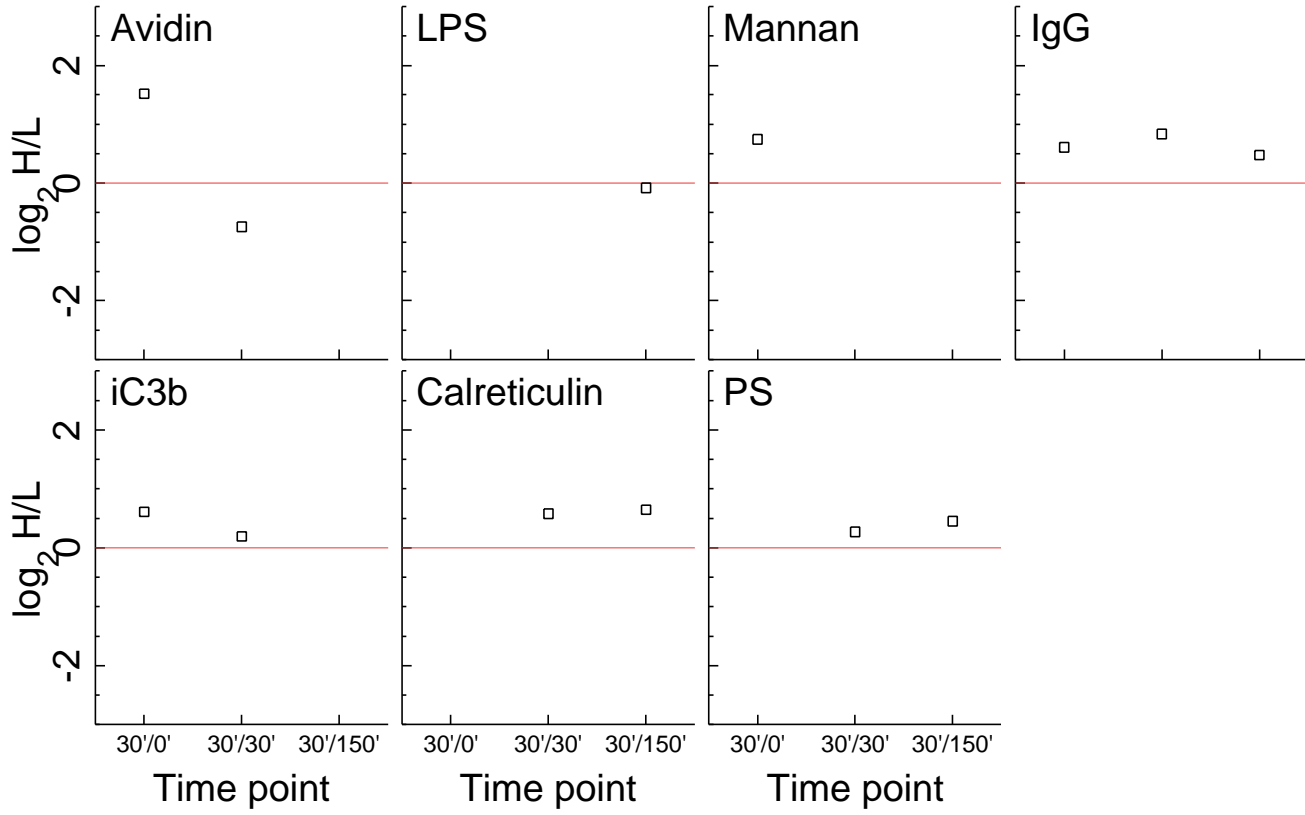

nono (Q99K48)

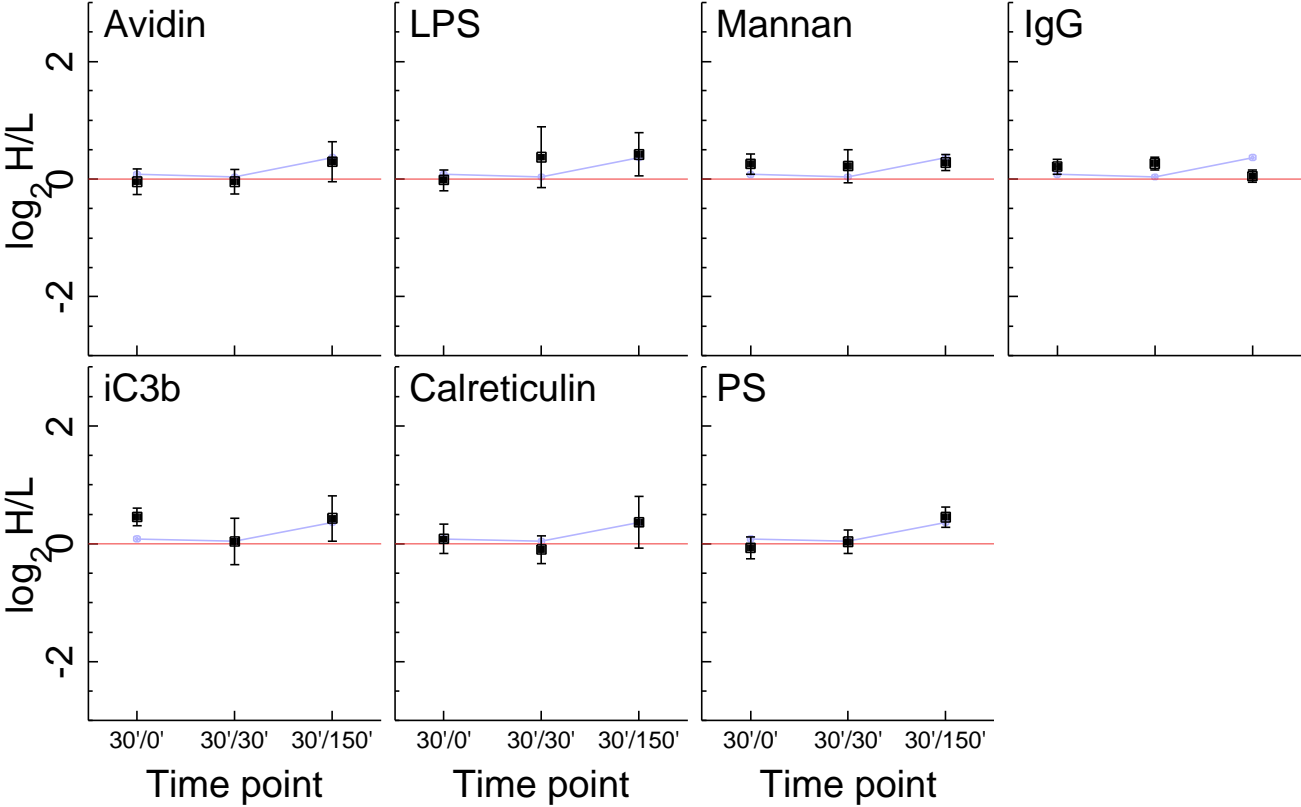

npc1 (O35604)

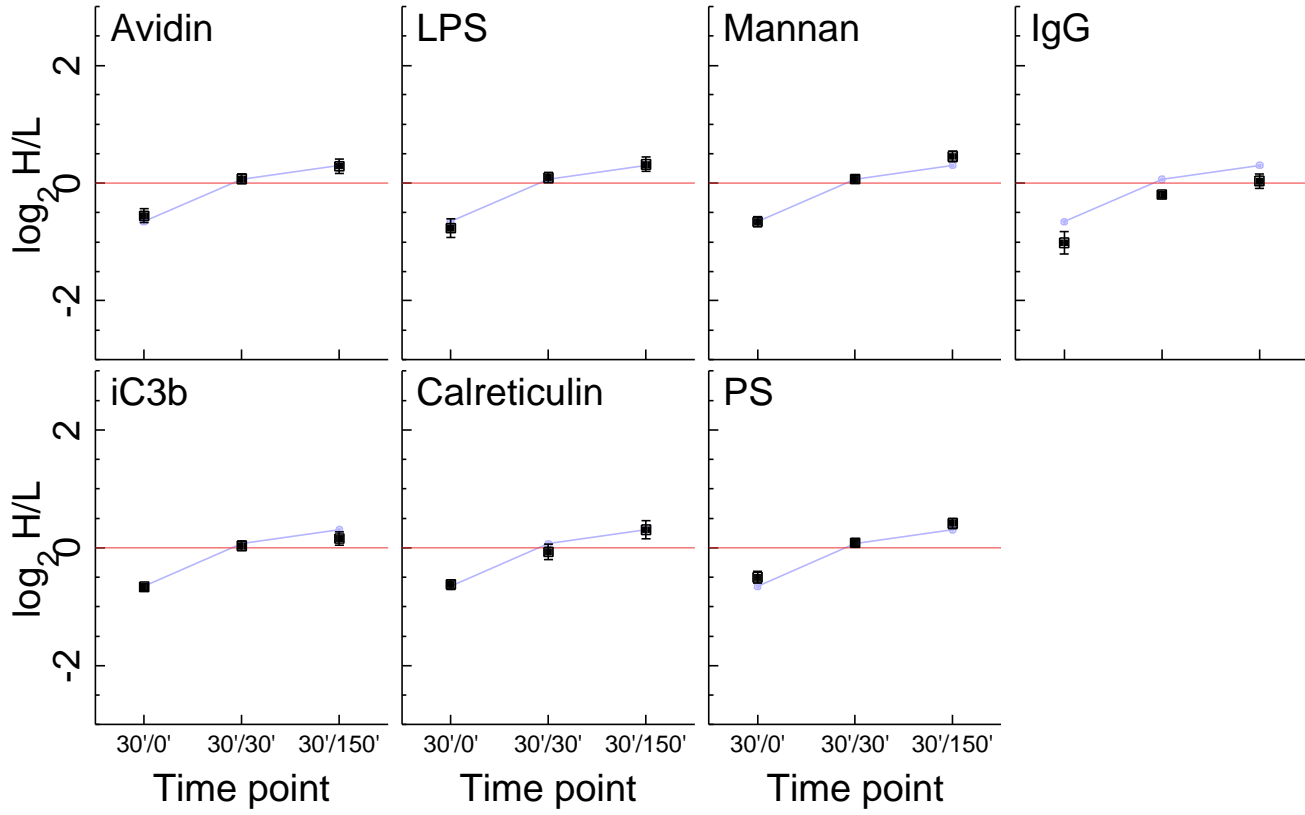

### npc2 (Q9Z0J0)

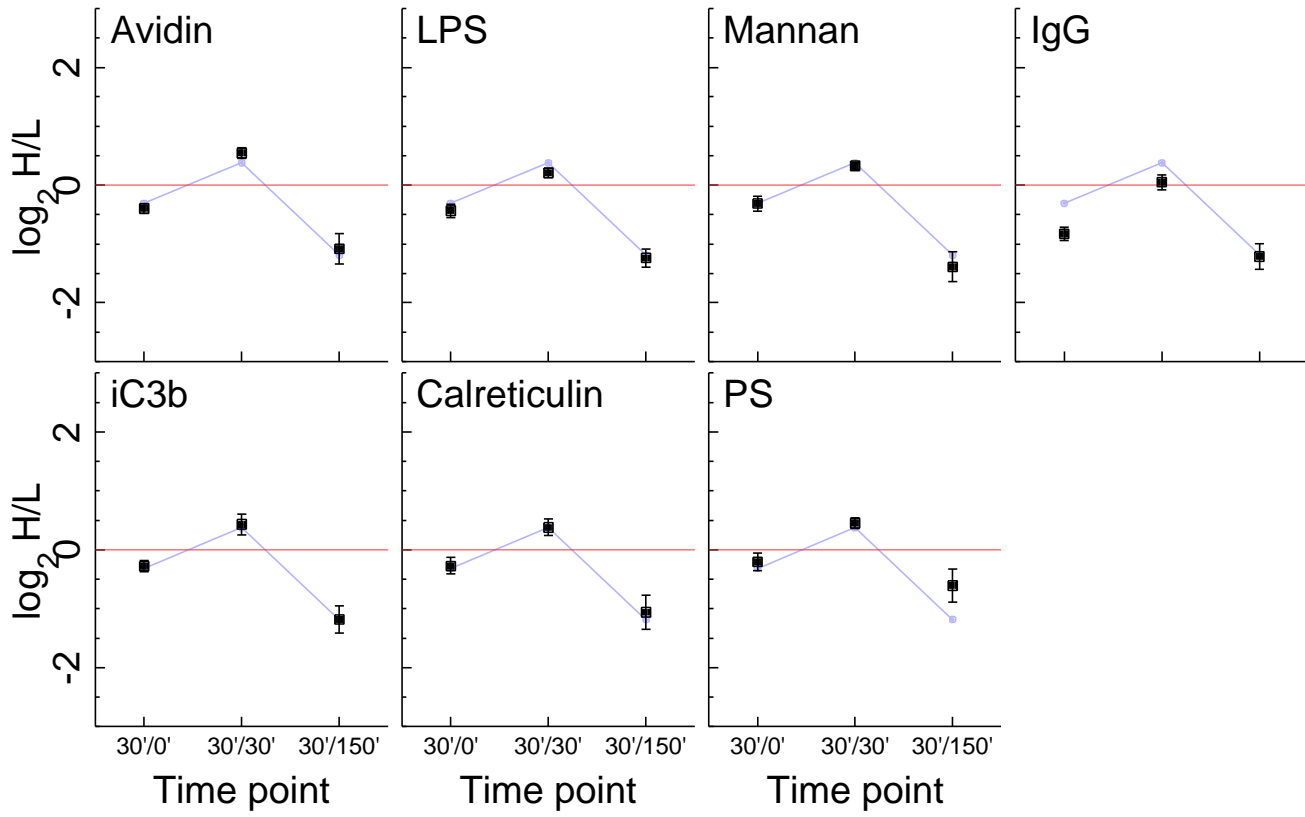

# npm1 (Q61937)

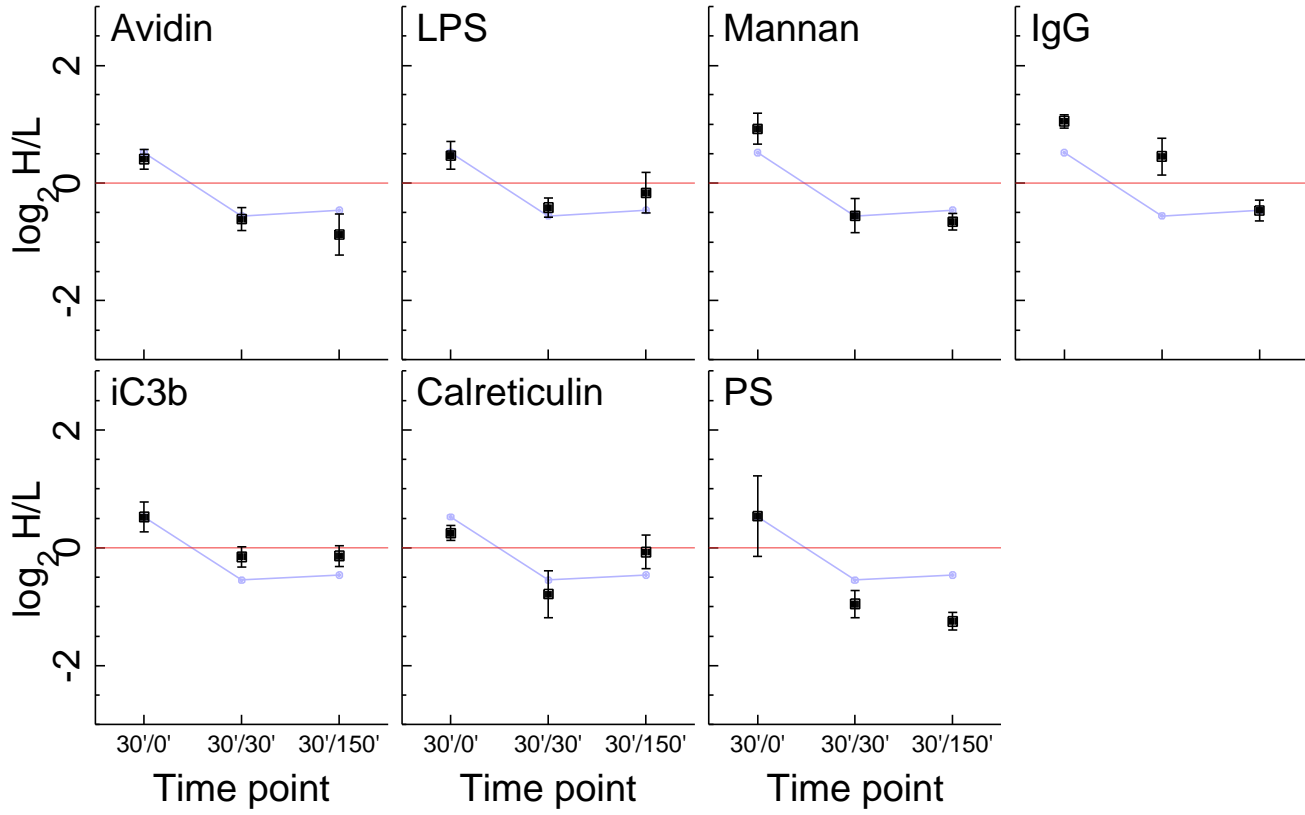

nptn (P97300)

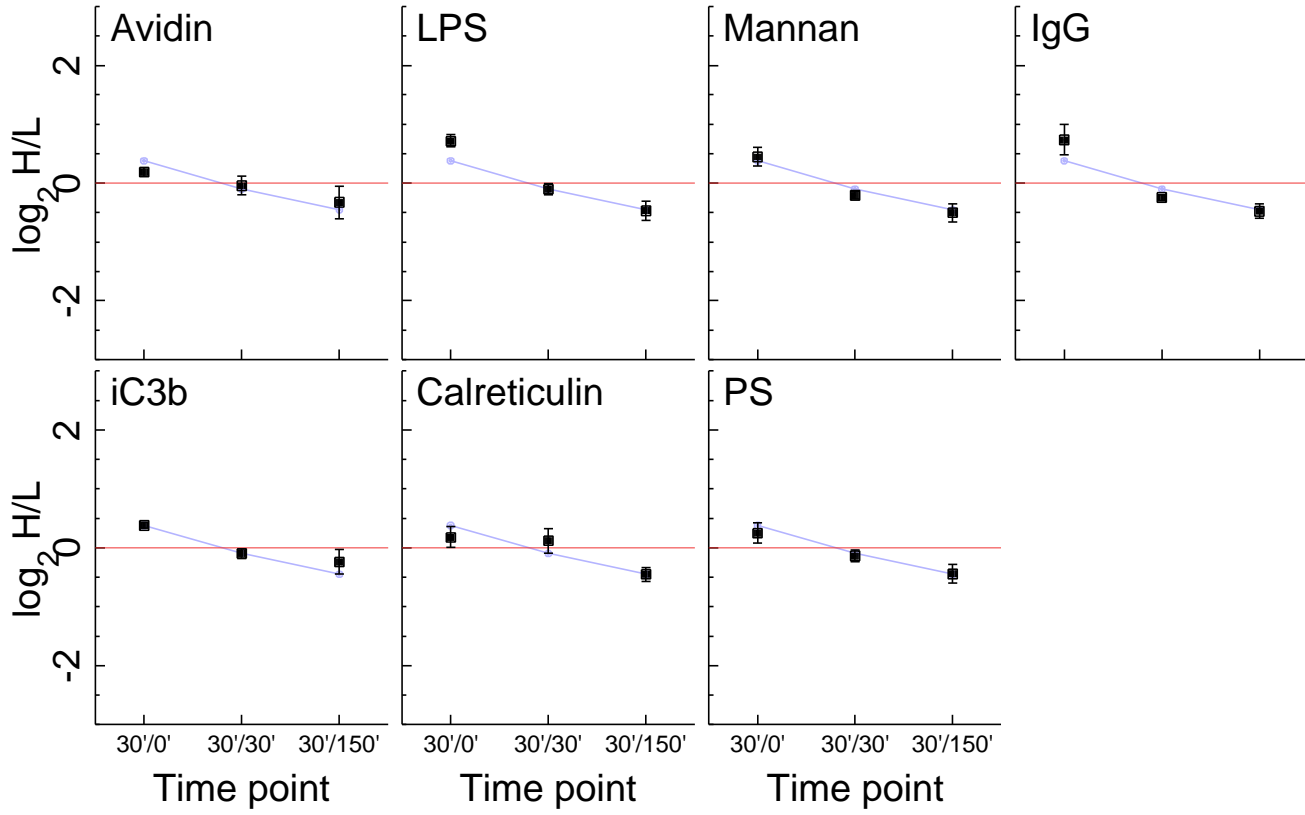

### nrp1 (P97333)

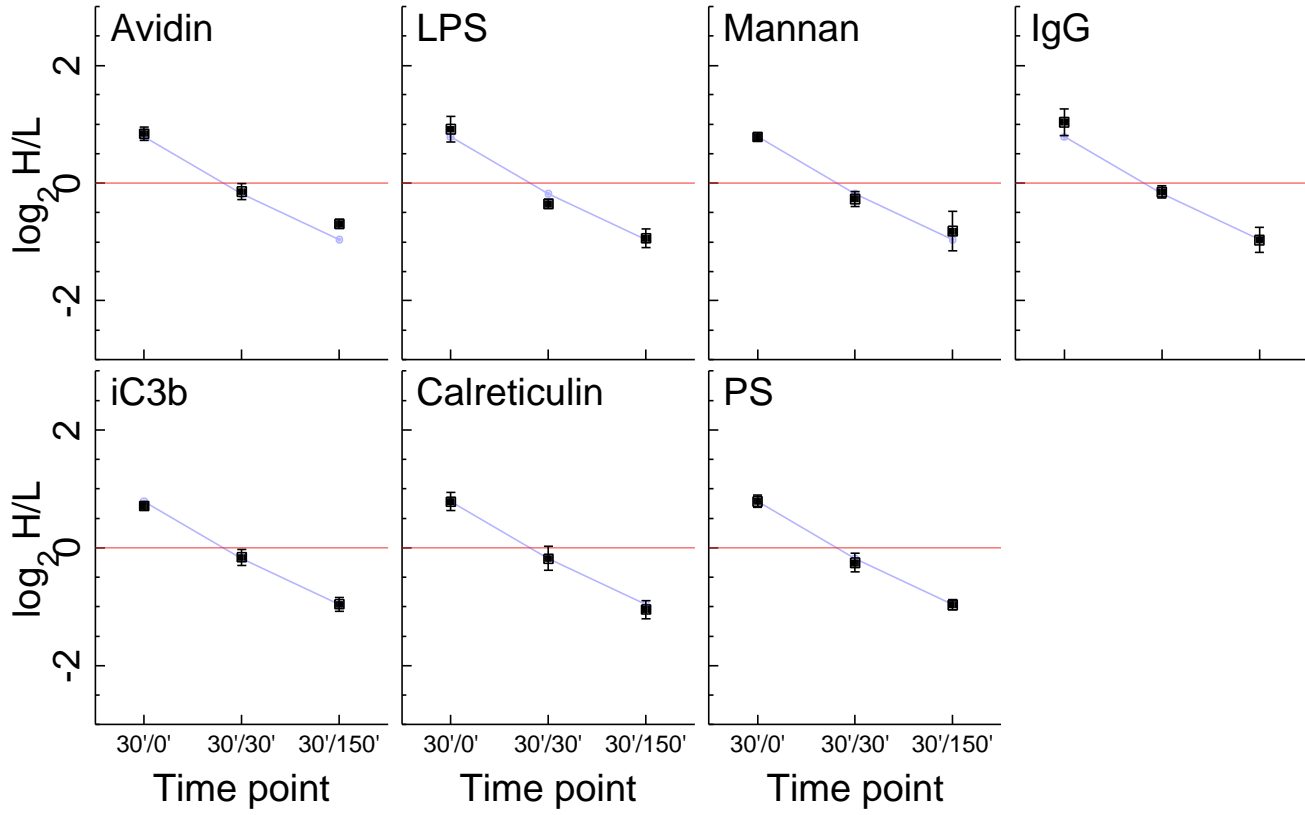

### nrp2 (O35375)

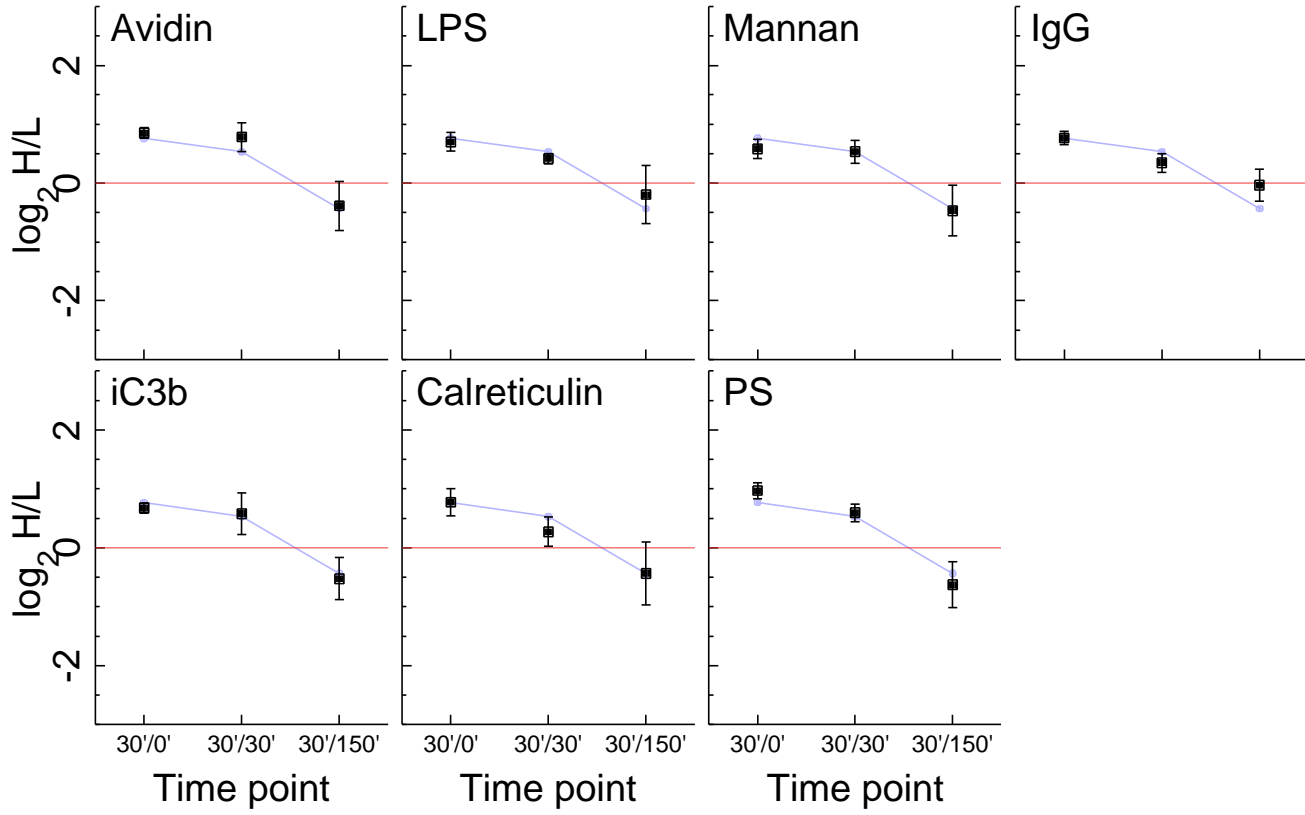



nsdhl (Q9R1J0)

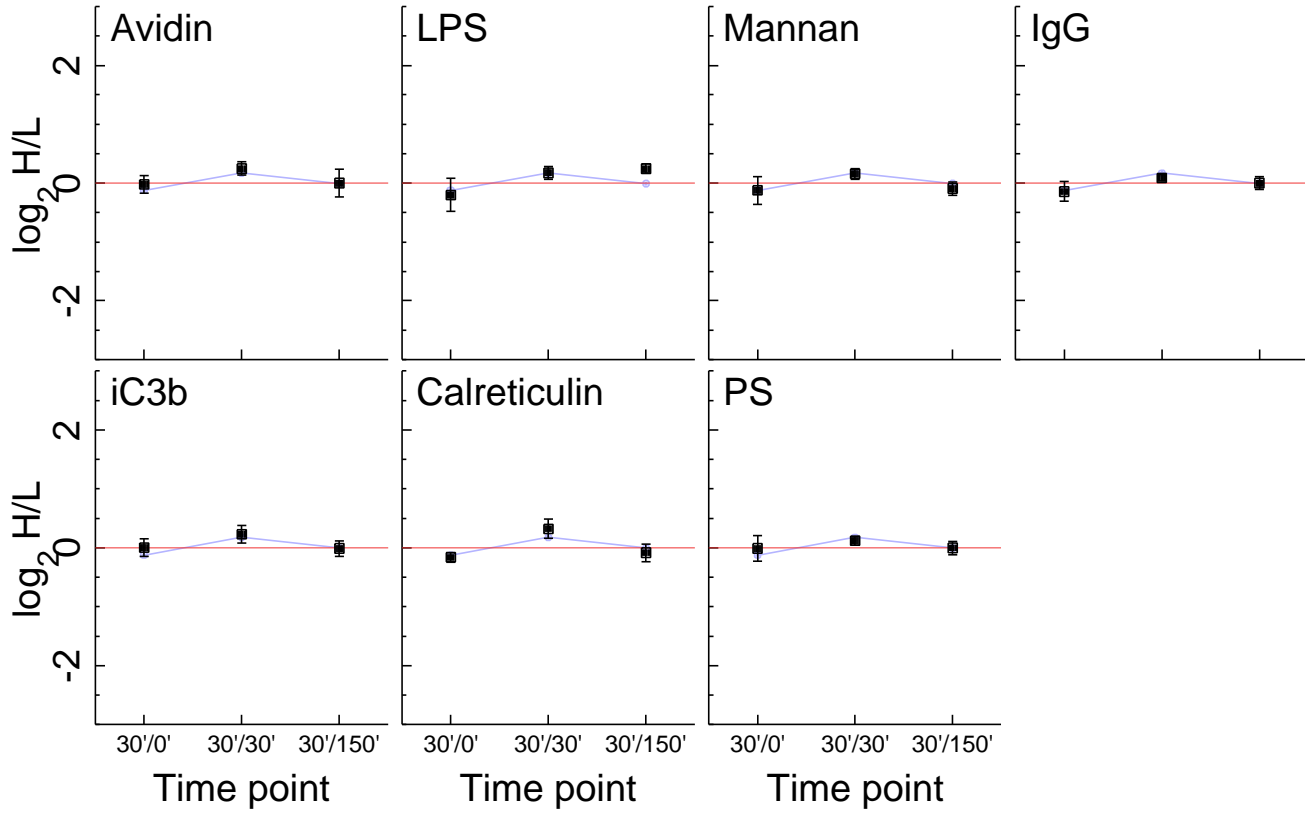

nsf (P46460)

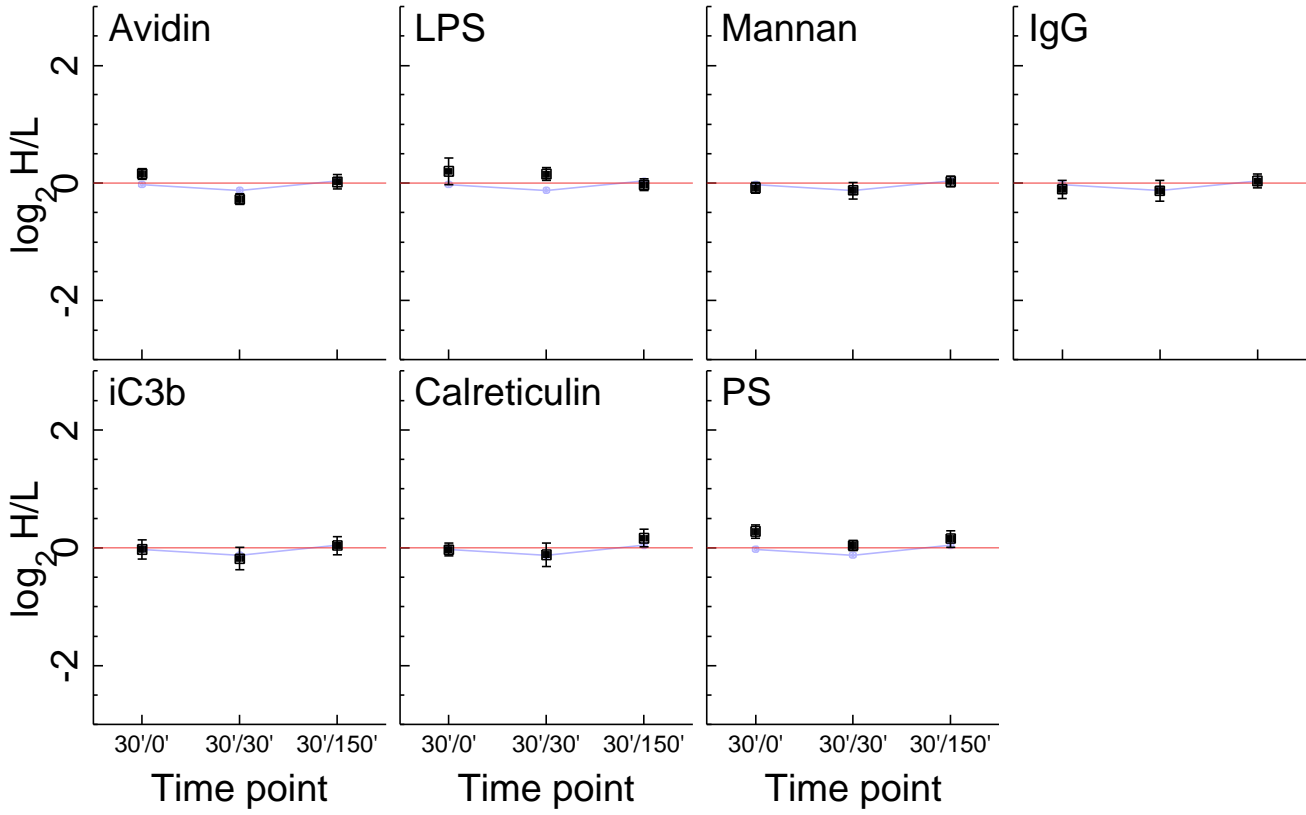

nucb1 (Q02819)

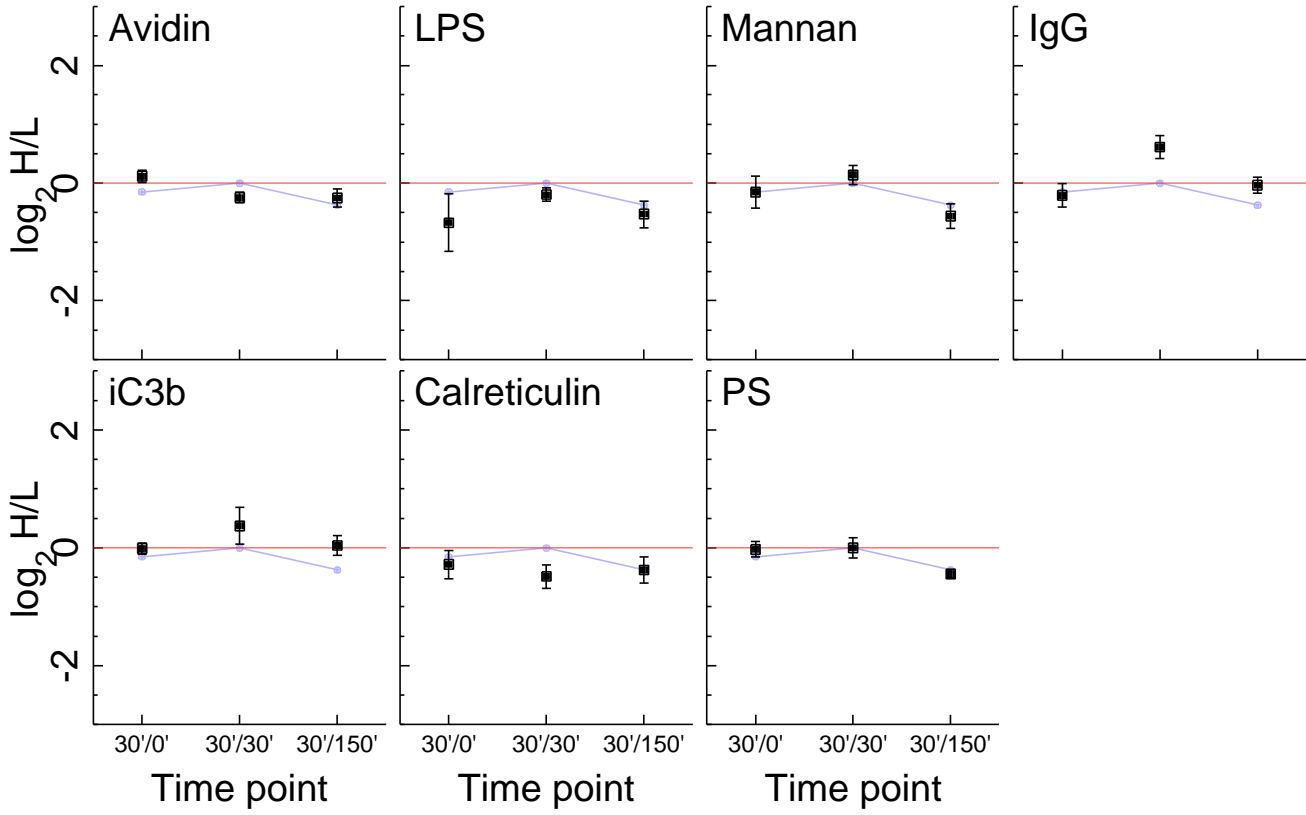

nucb2 (P81117)

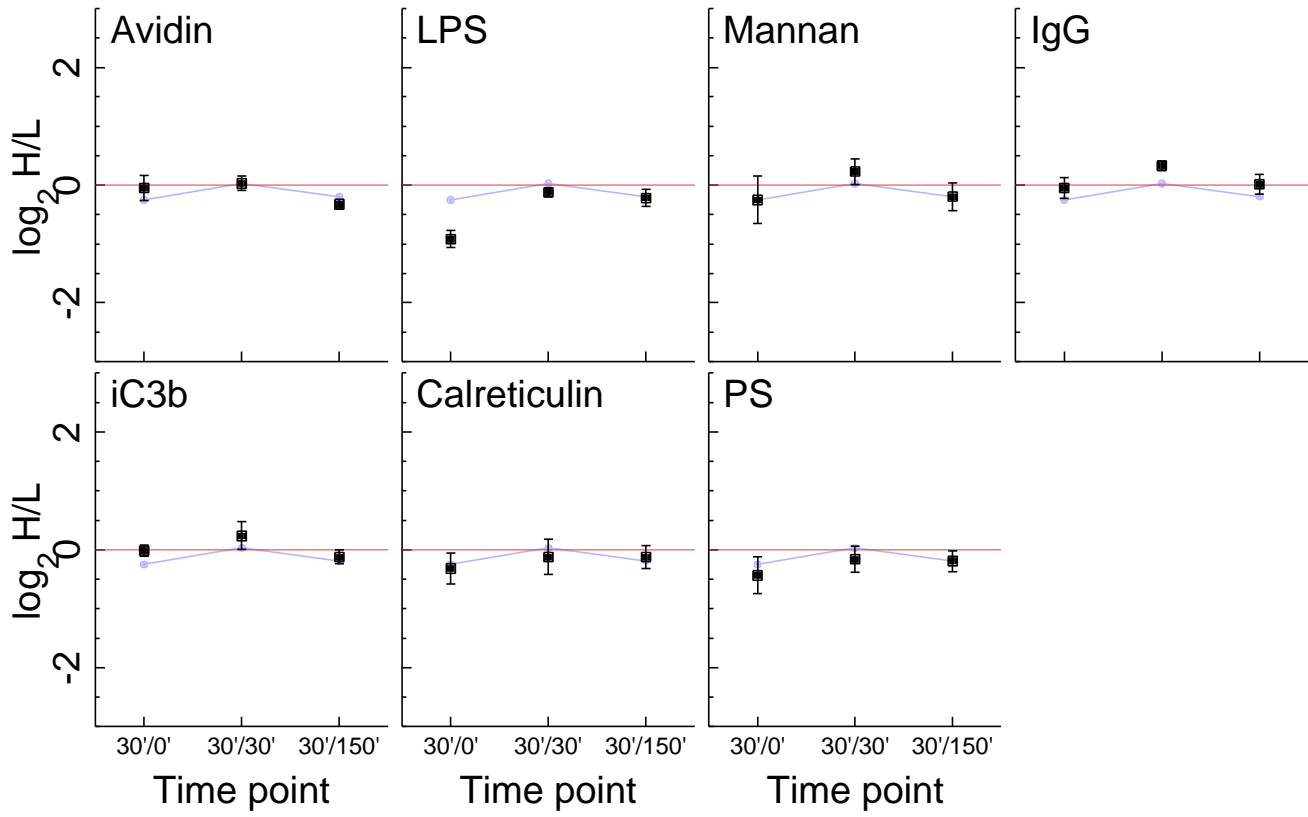

nudc (O35685)

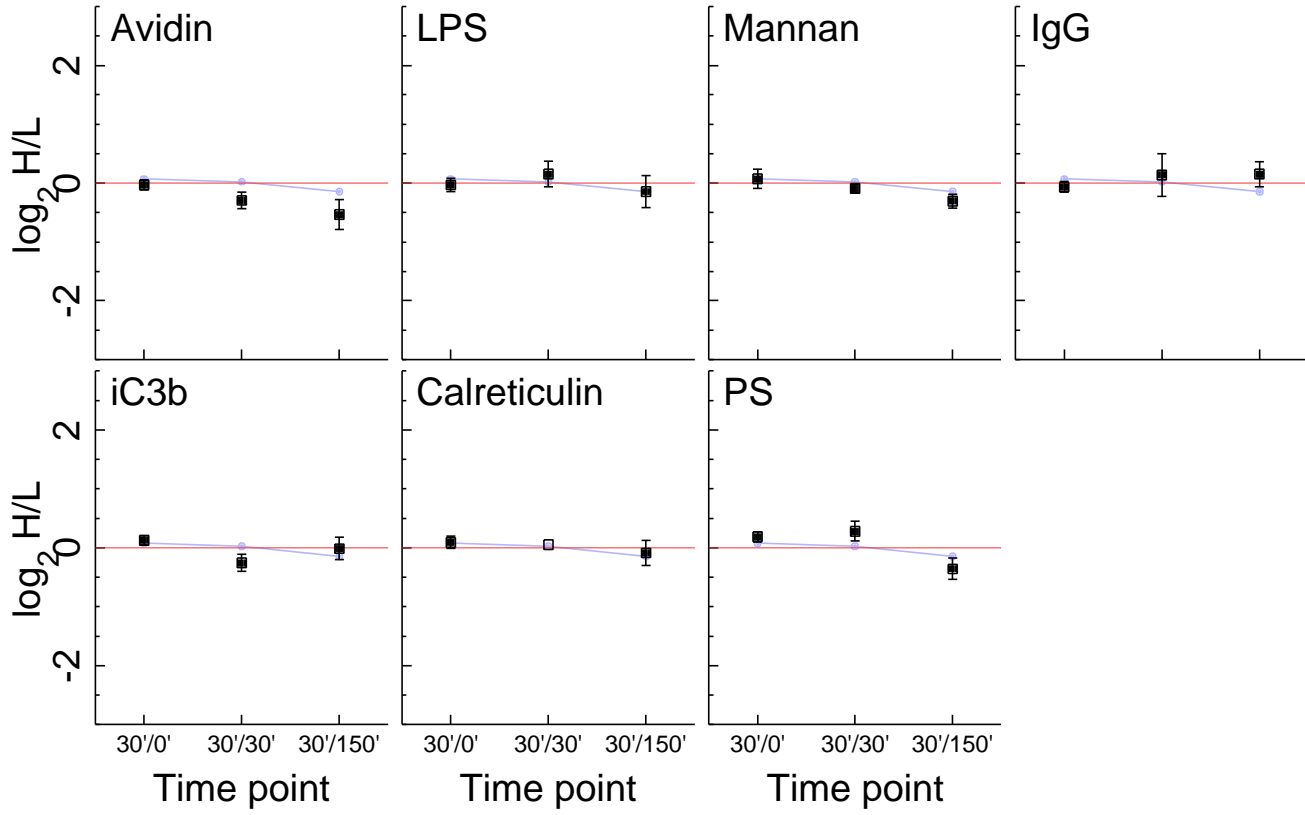

# numa1 (E9Q7G0)

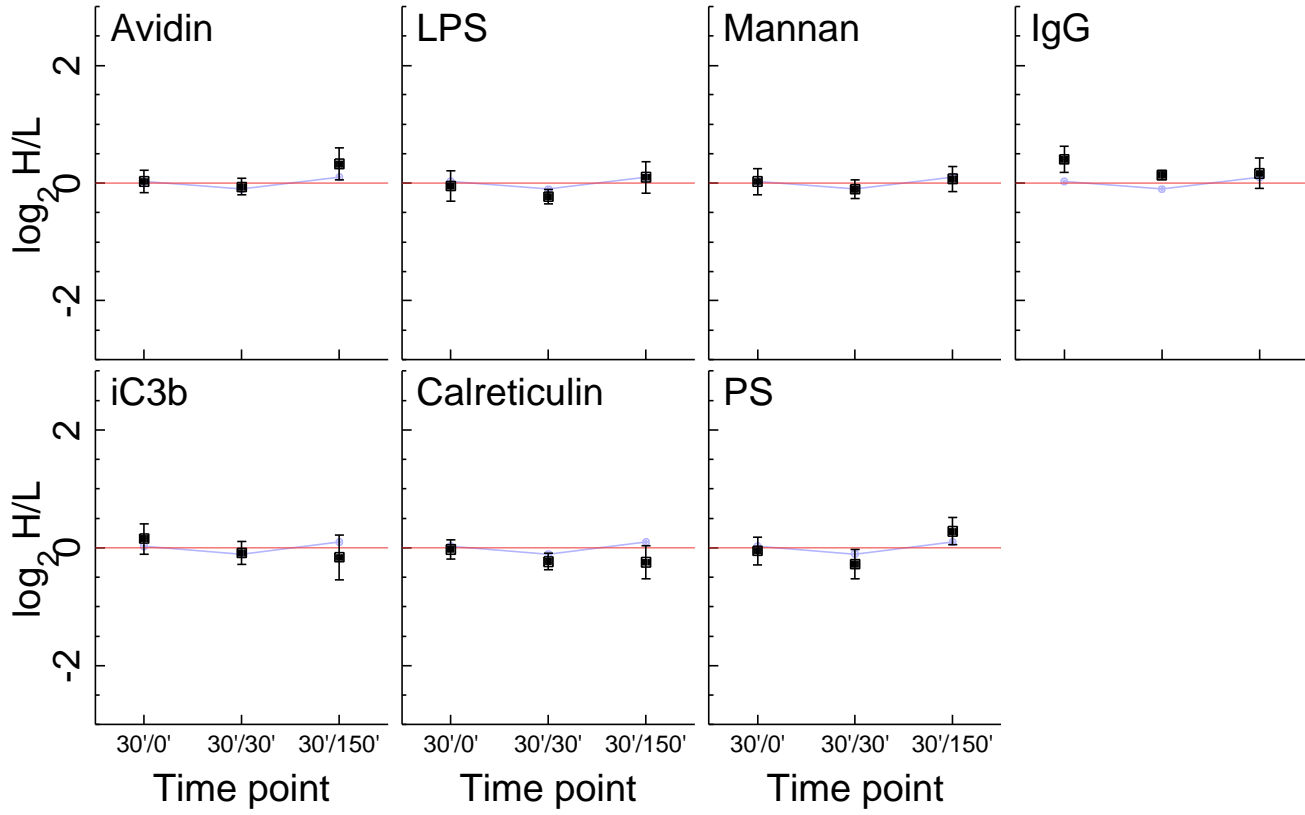

numbl (O08919)

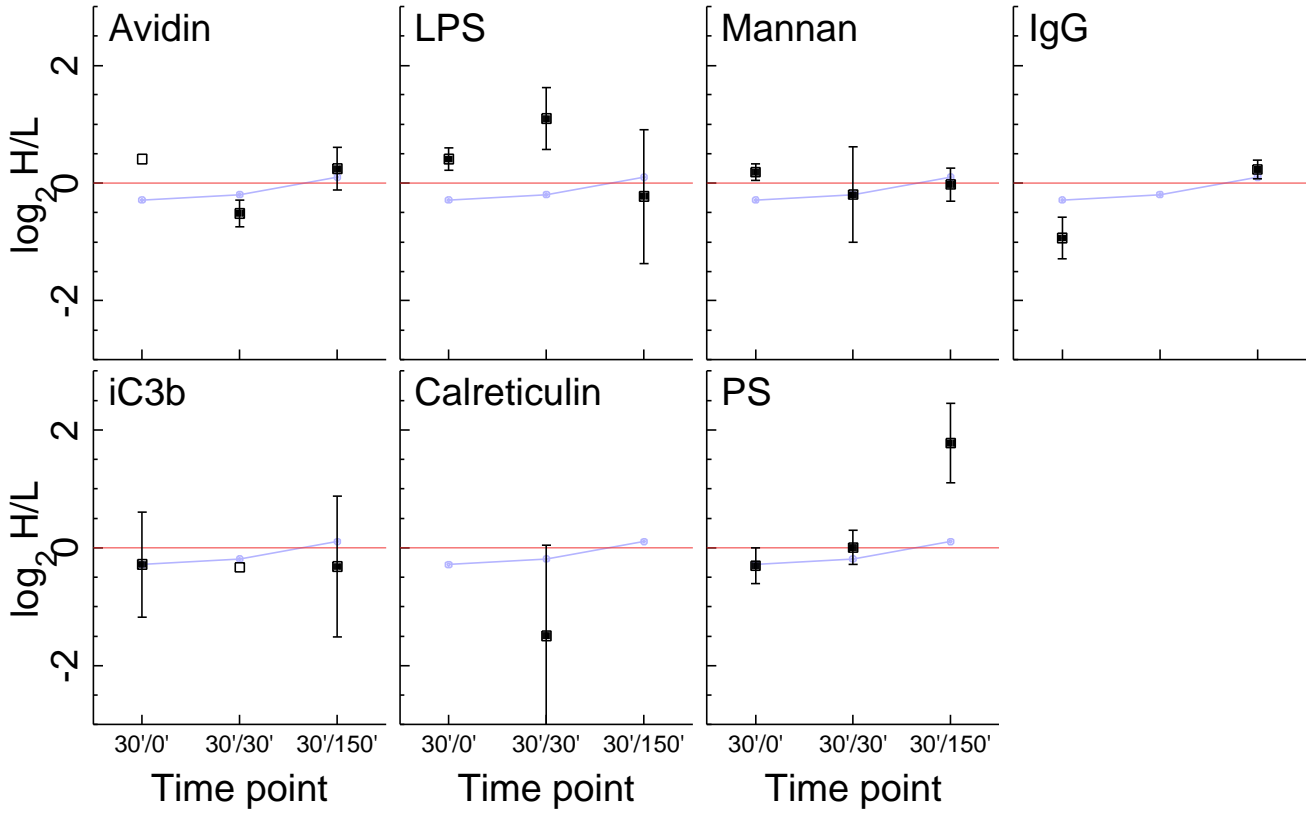

numb (Q9QZS3)

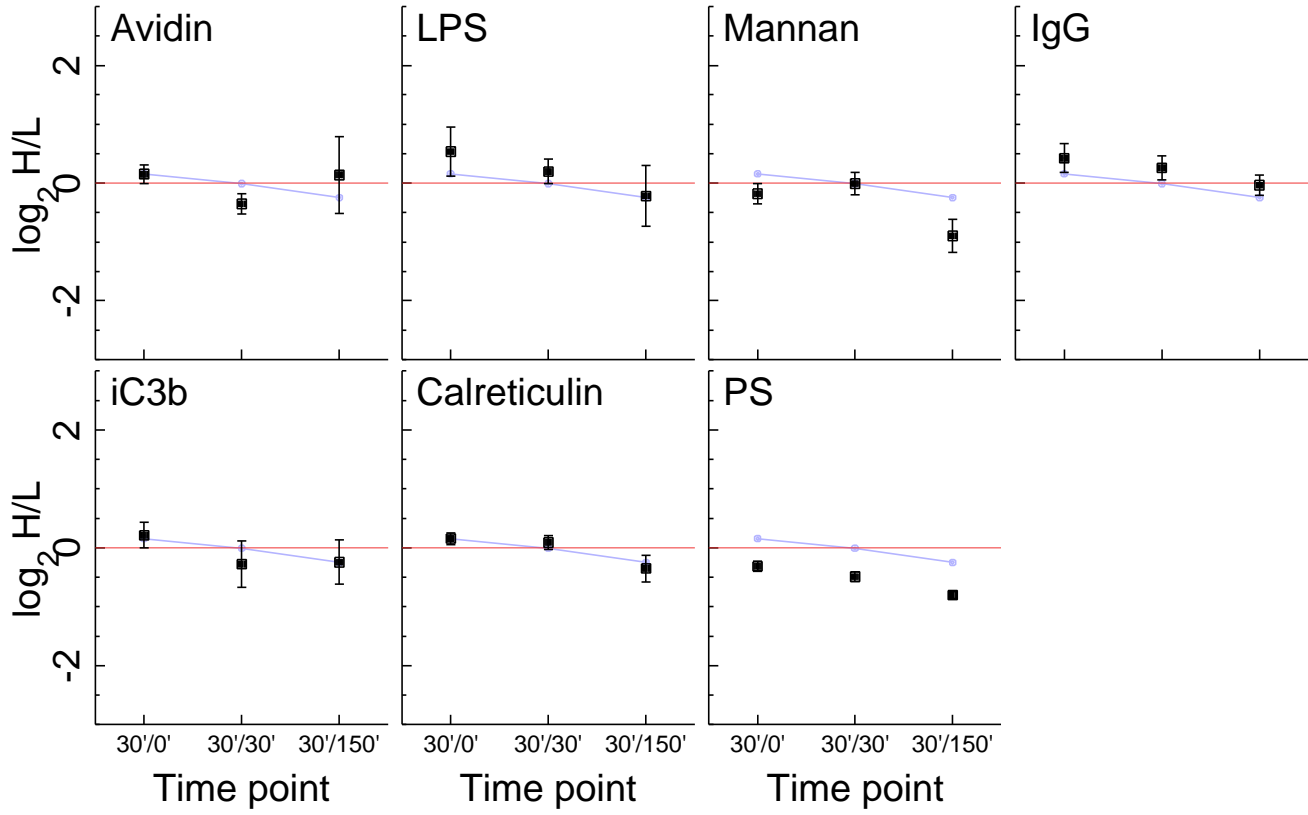



nup54 (Q8BTS4)

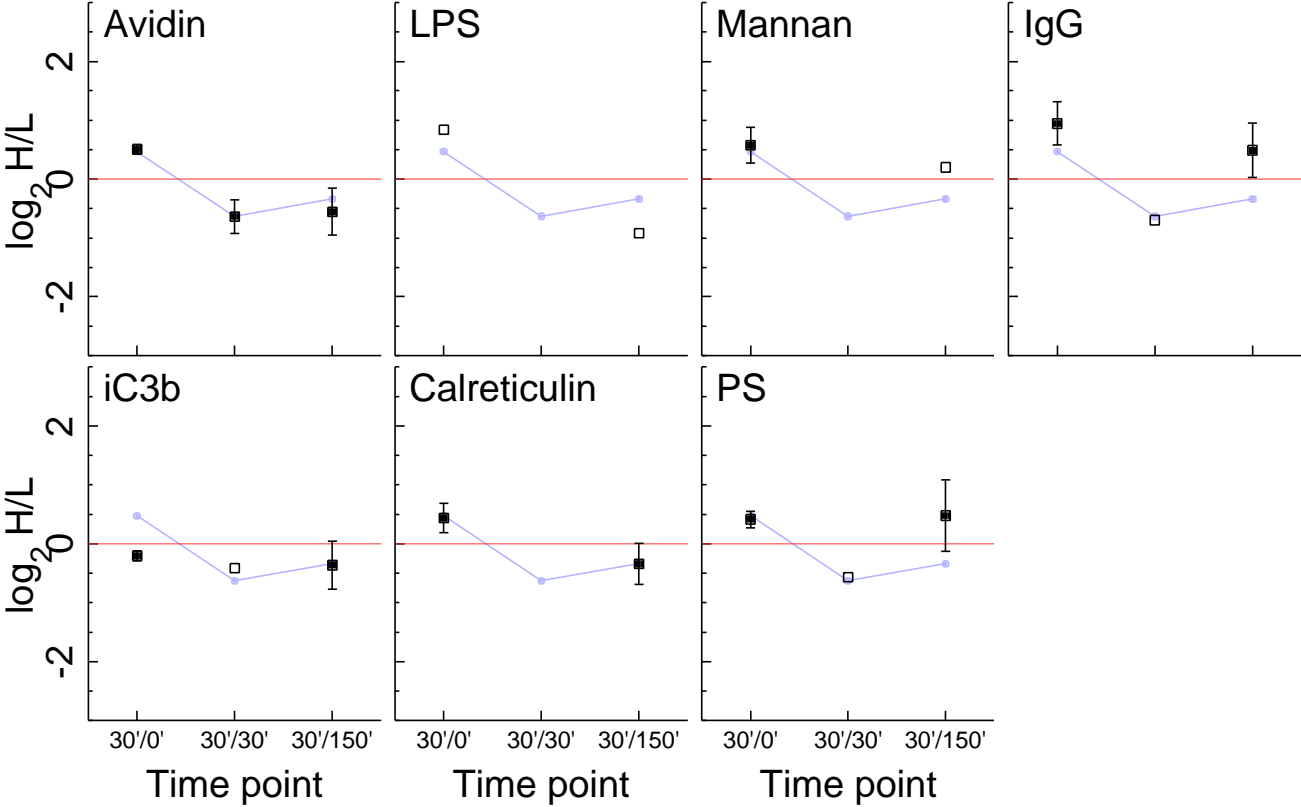

### nup62 (Q63850)

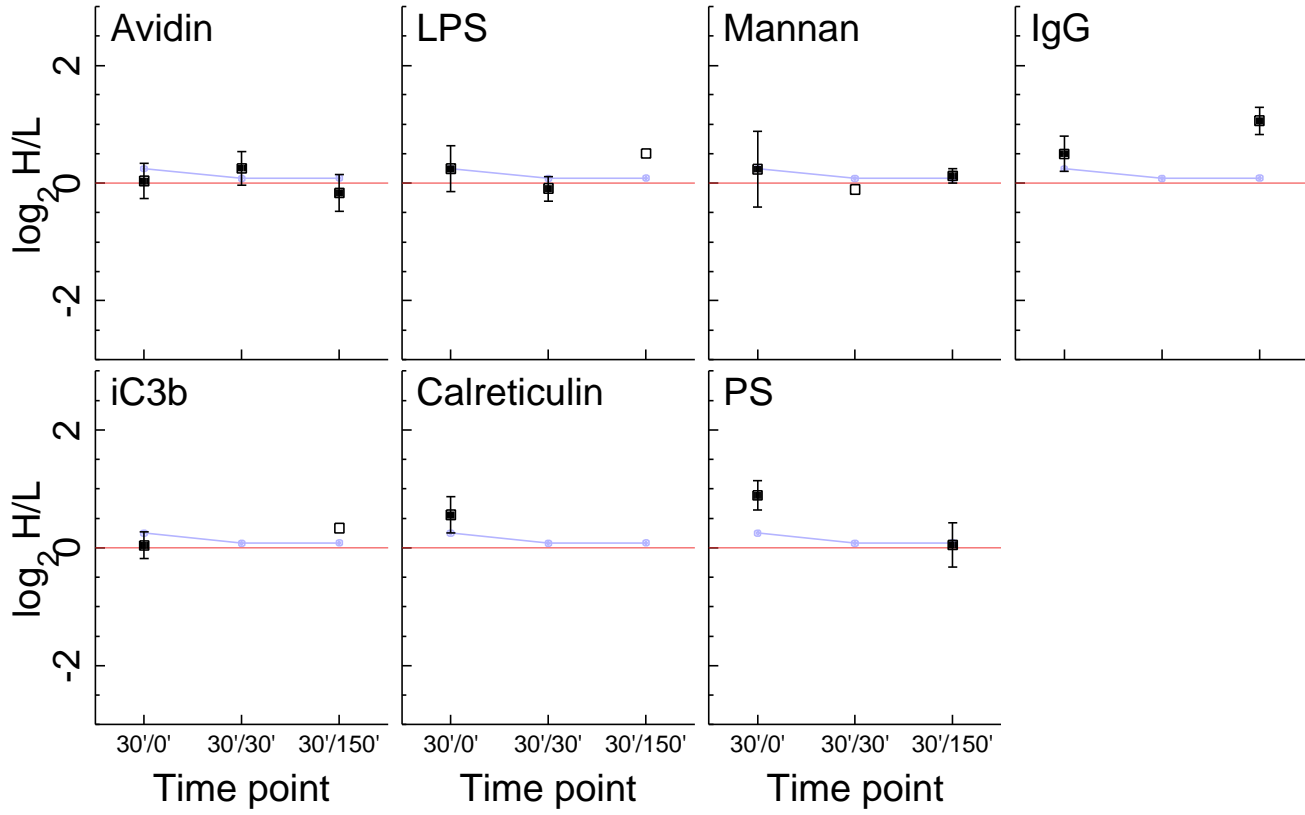

nutf2 (P61971)

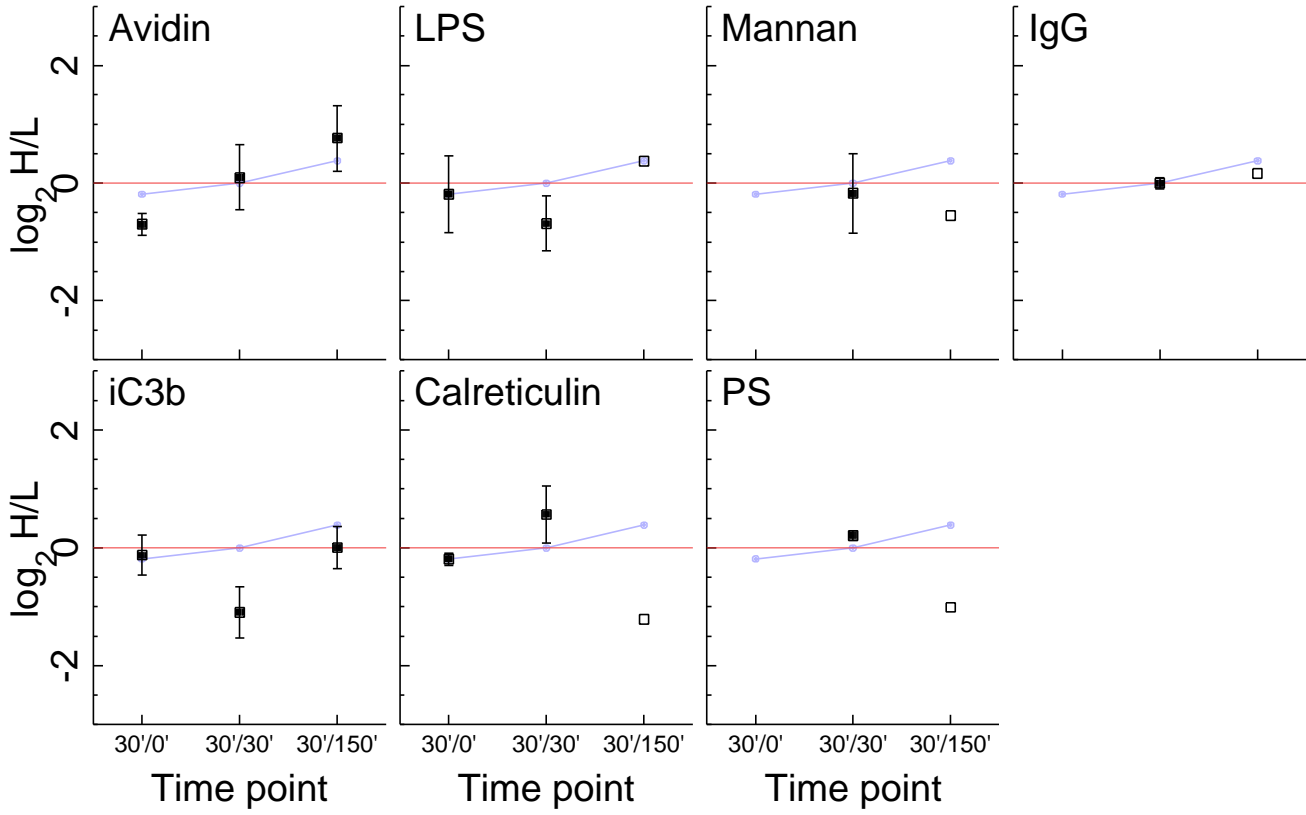

oas1a (P11928)

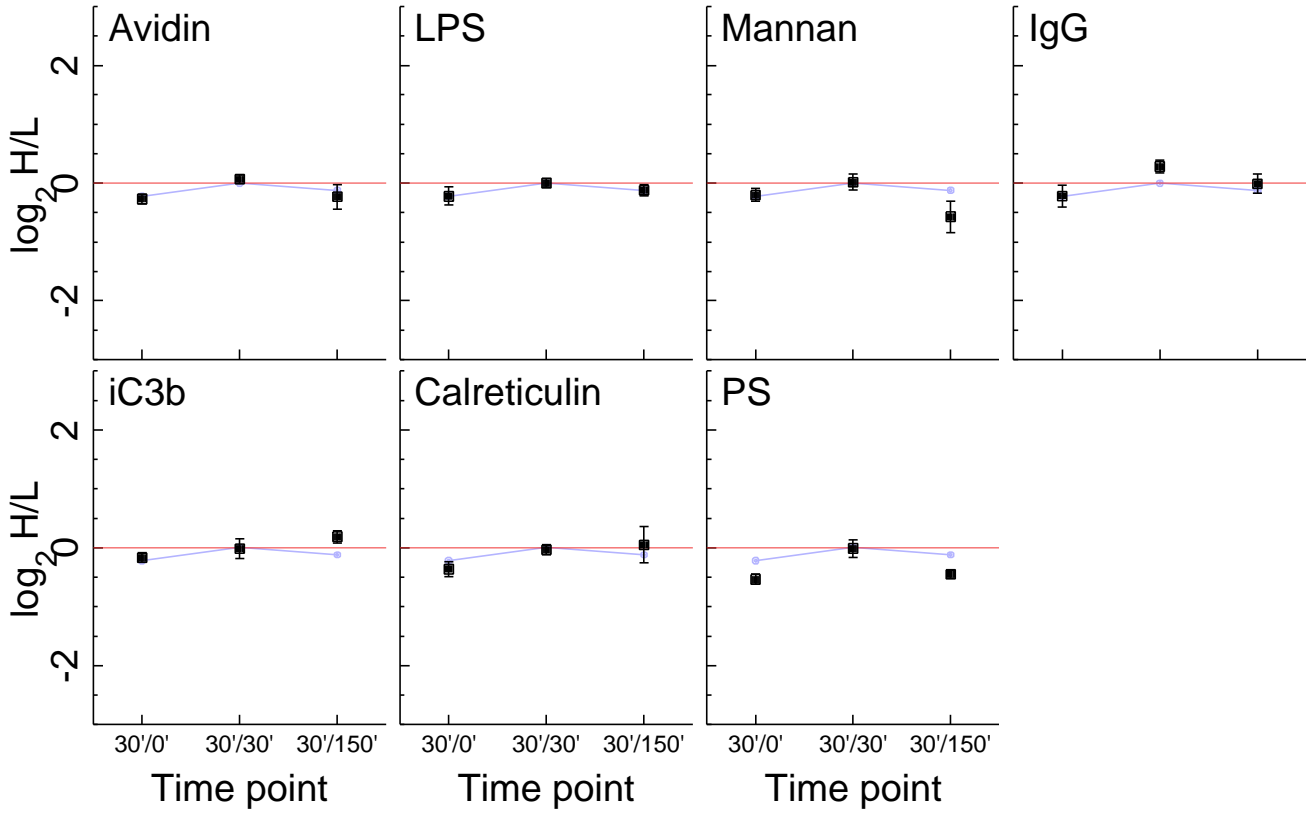

### oas3 (Q8VI93)

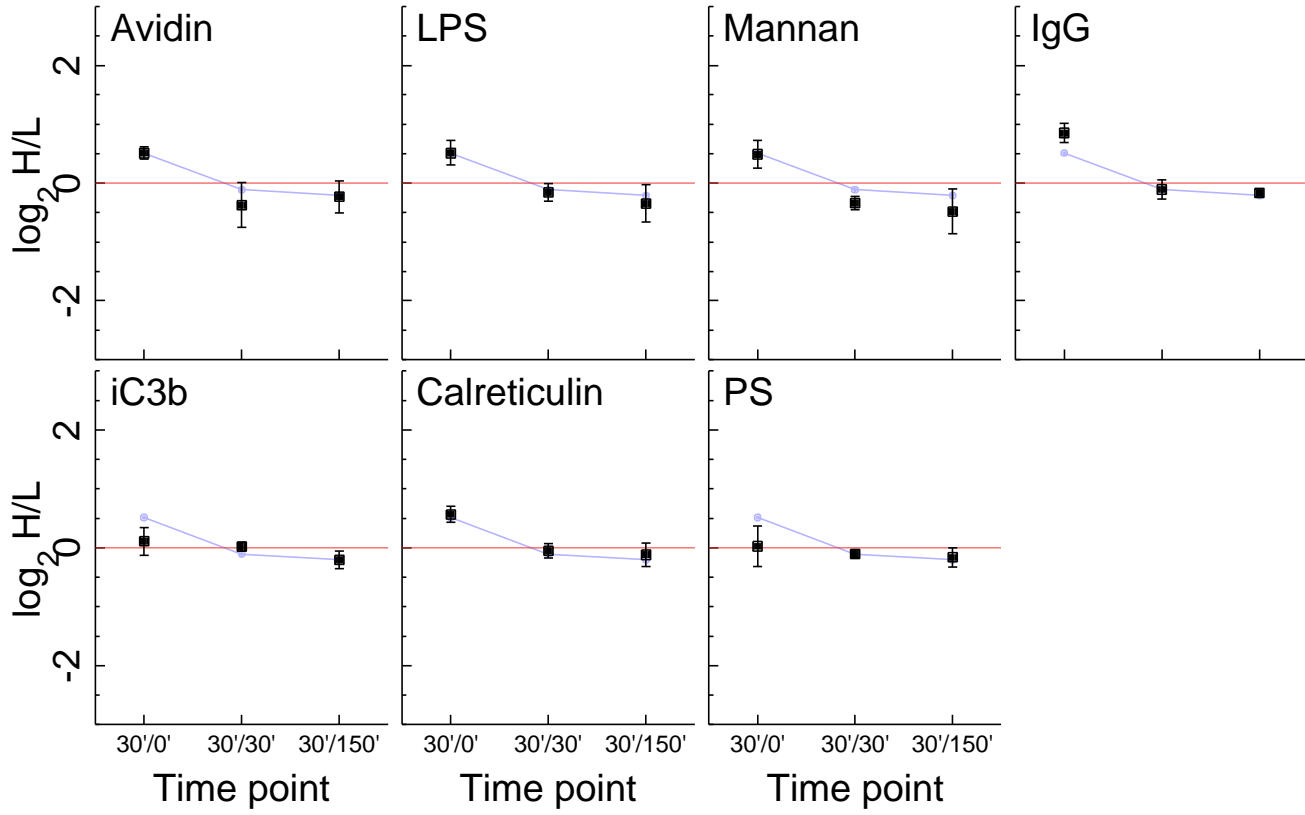

oat (P29758)

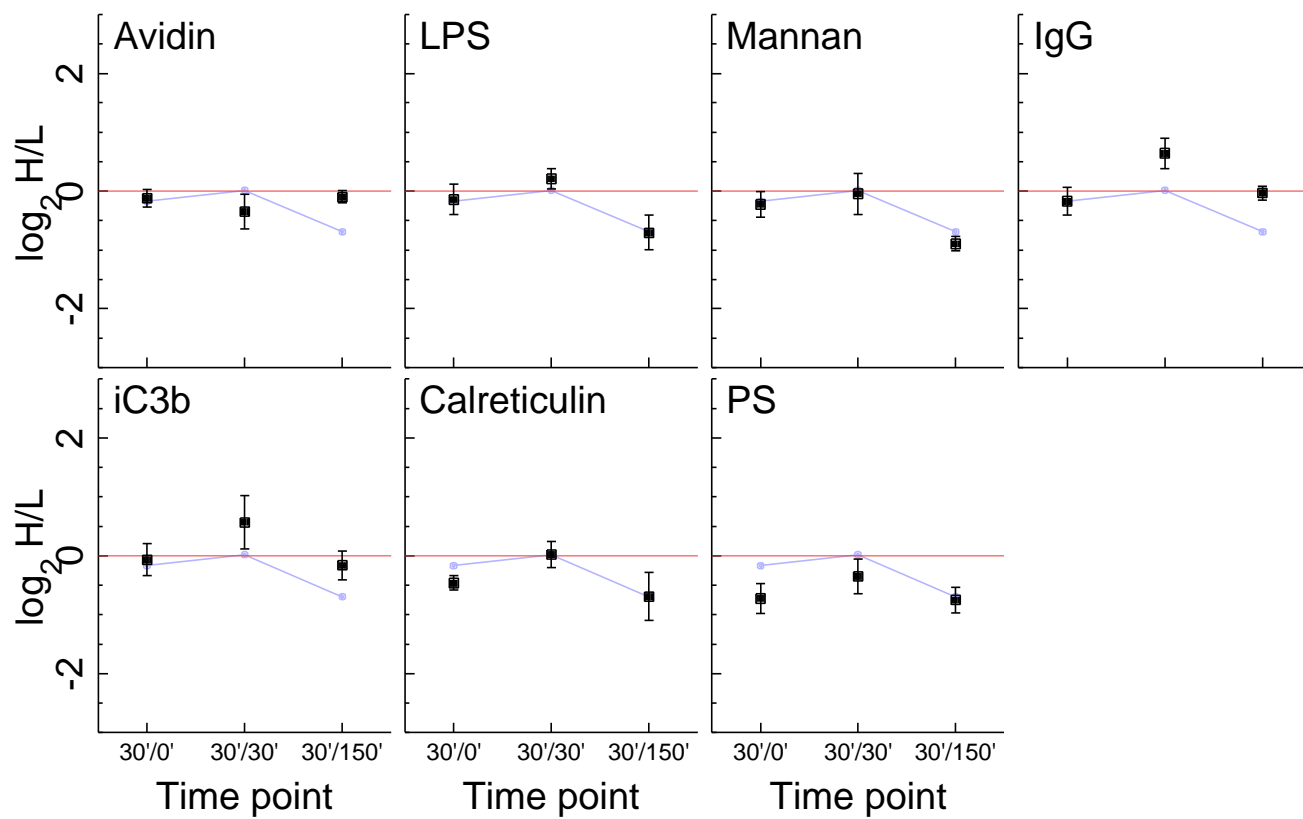

ogdh (Q60597)

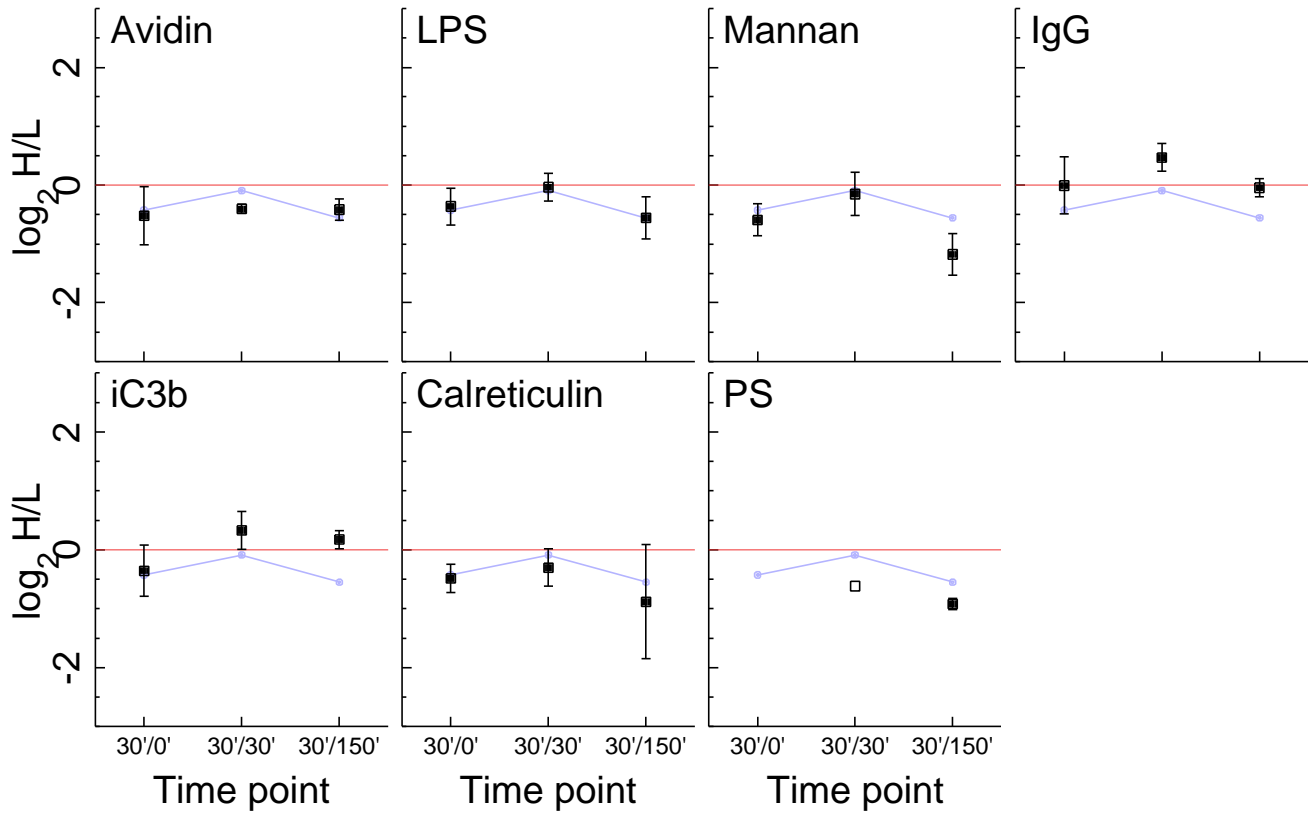

orf3 (Q9EP72)

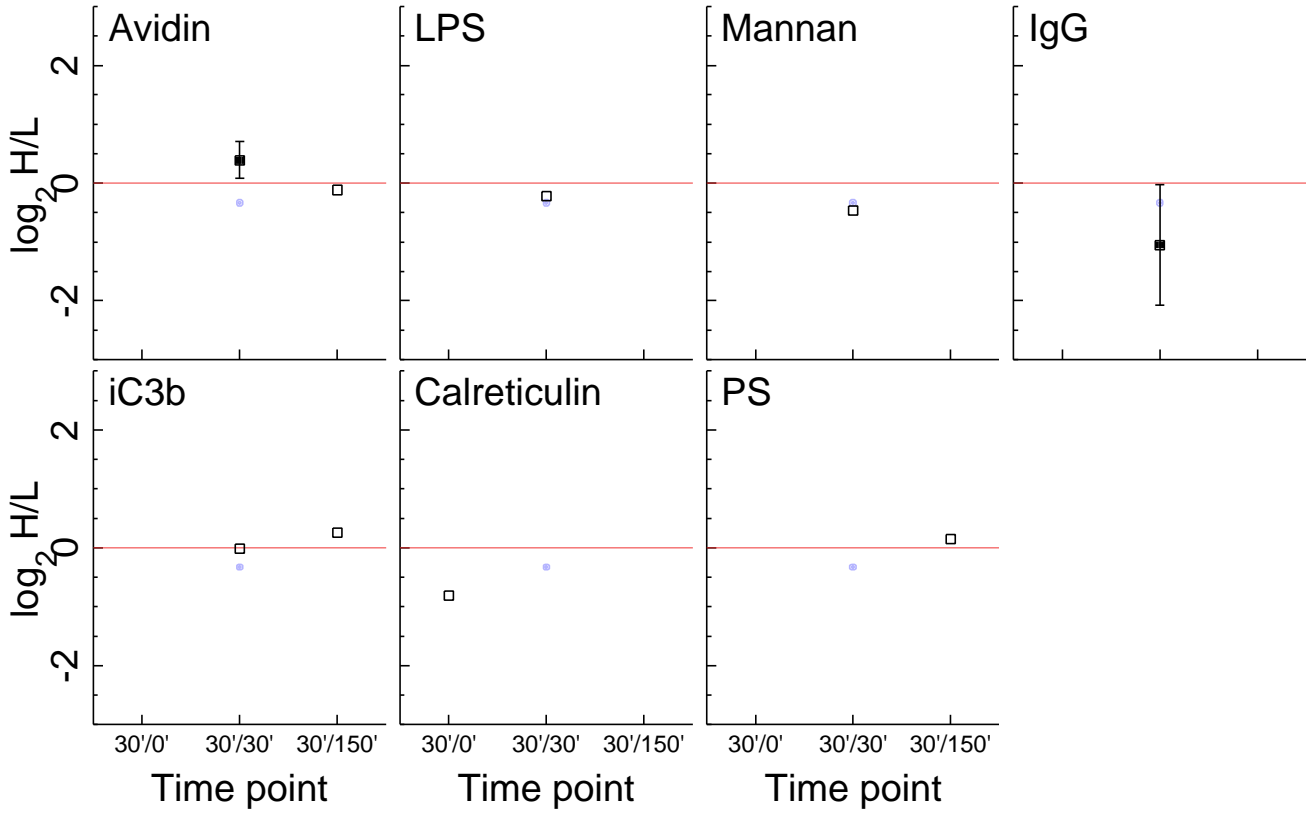



osbp (E9QPD4)

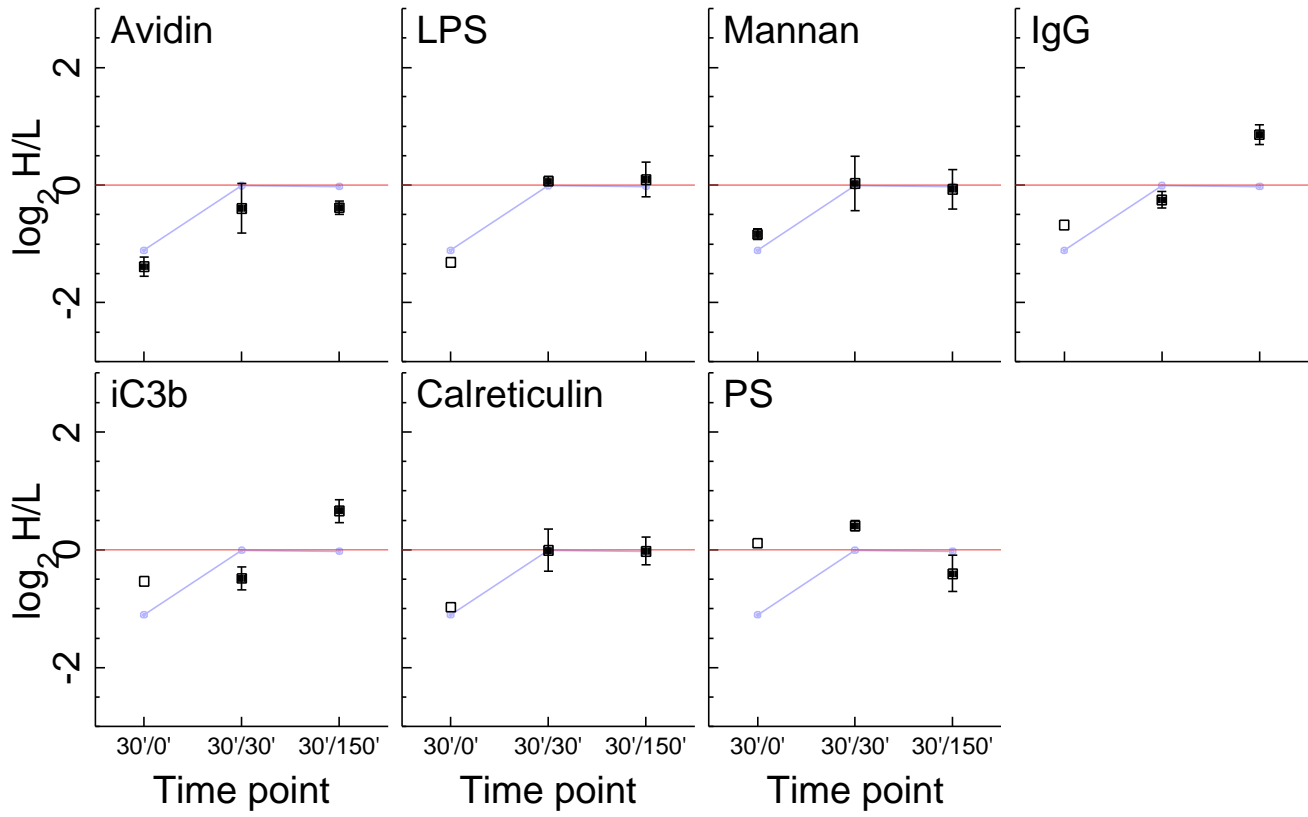

### osbp11 (G5E8A0)

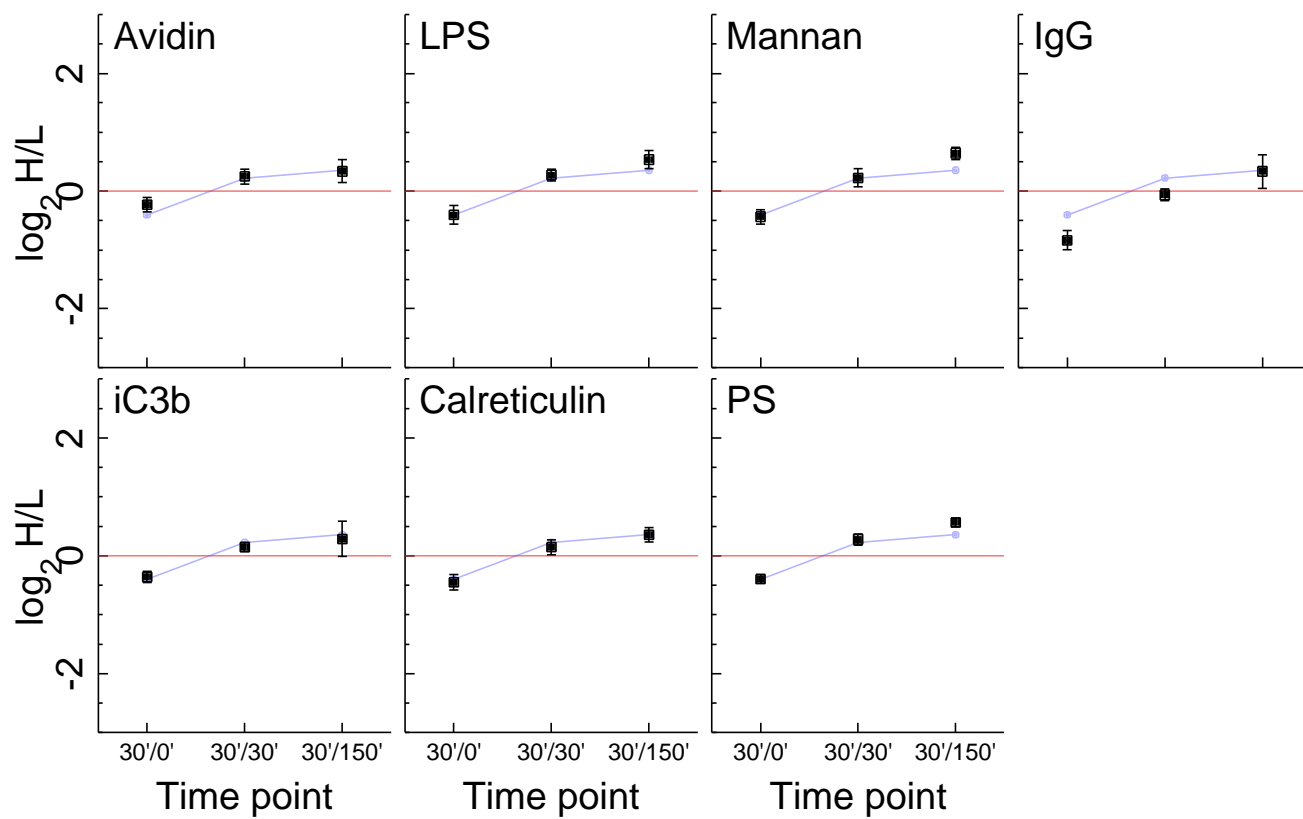

### osbp1a (Q91XL9)

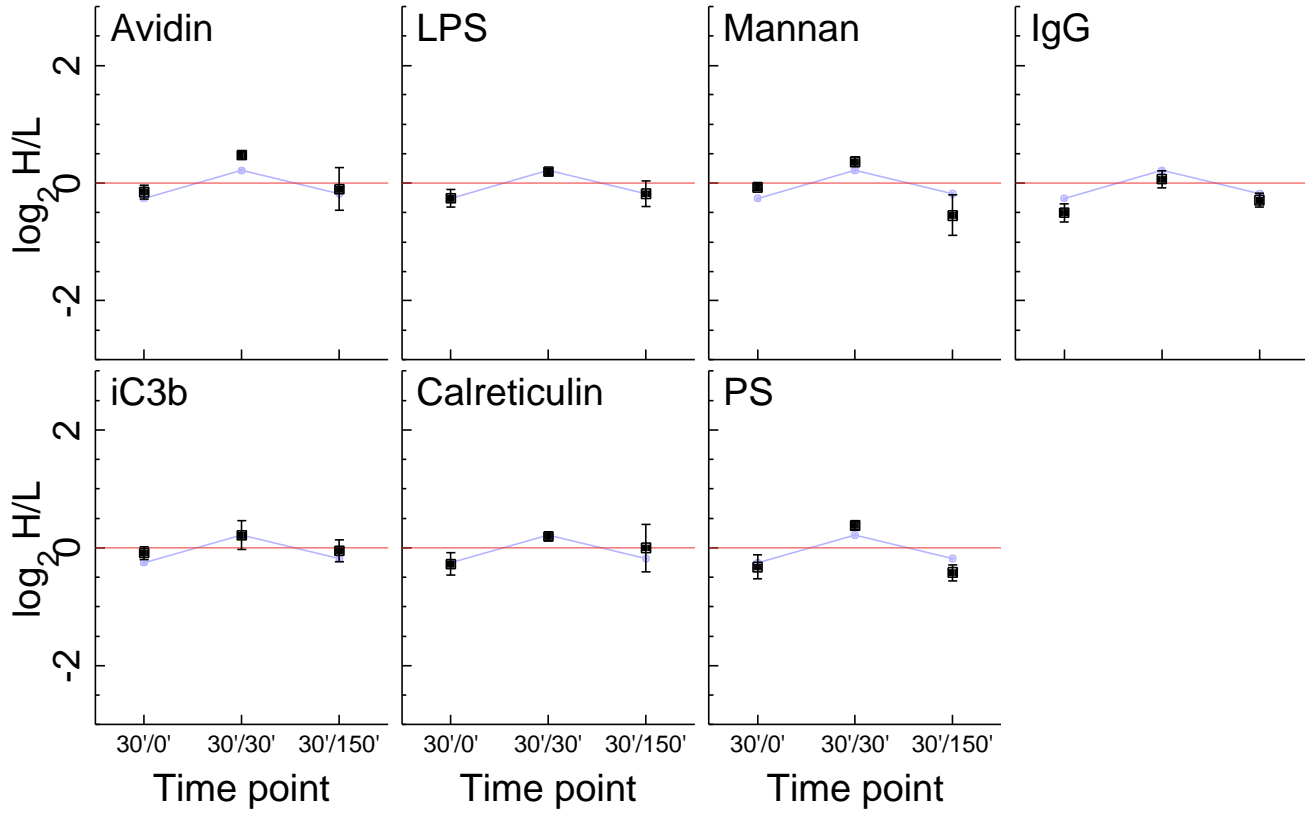

### osbpl6 (Q8BXR9)

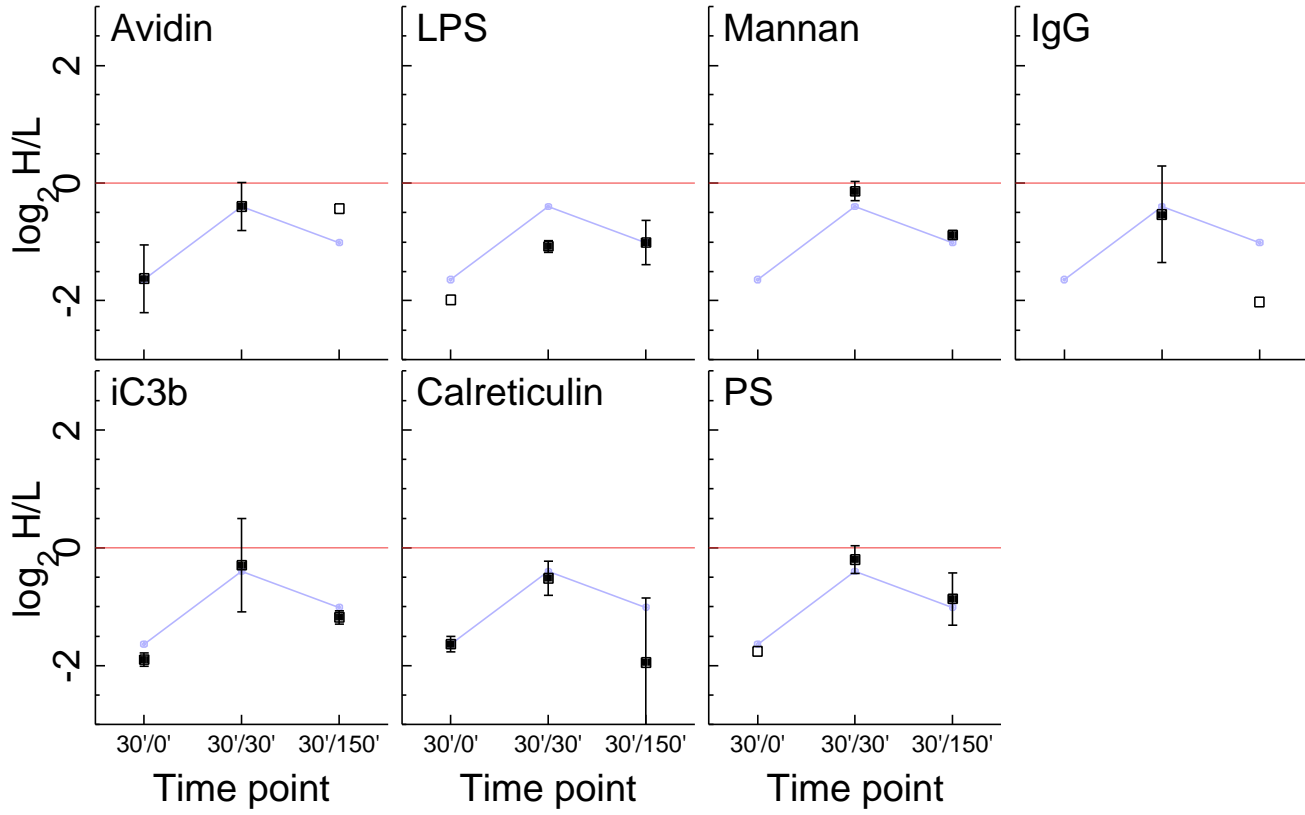

osbp18 (B9EJ86)

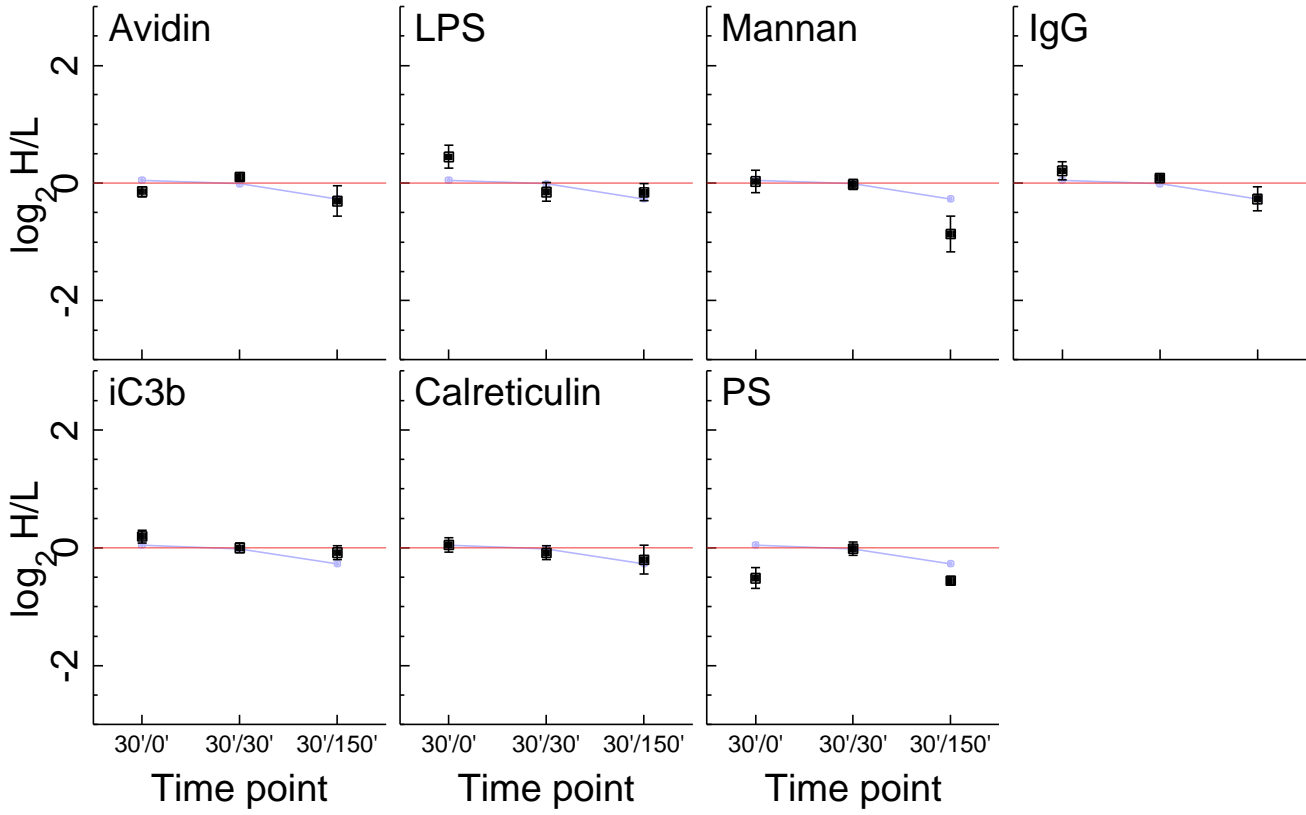

osbpl9 (A2A8Z1)

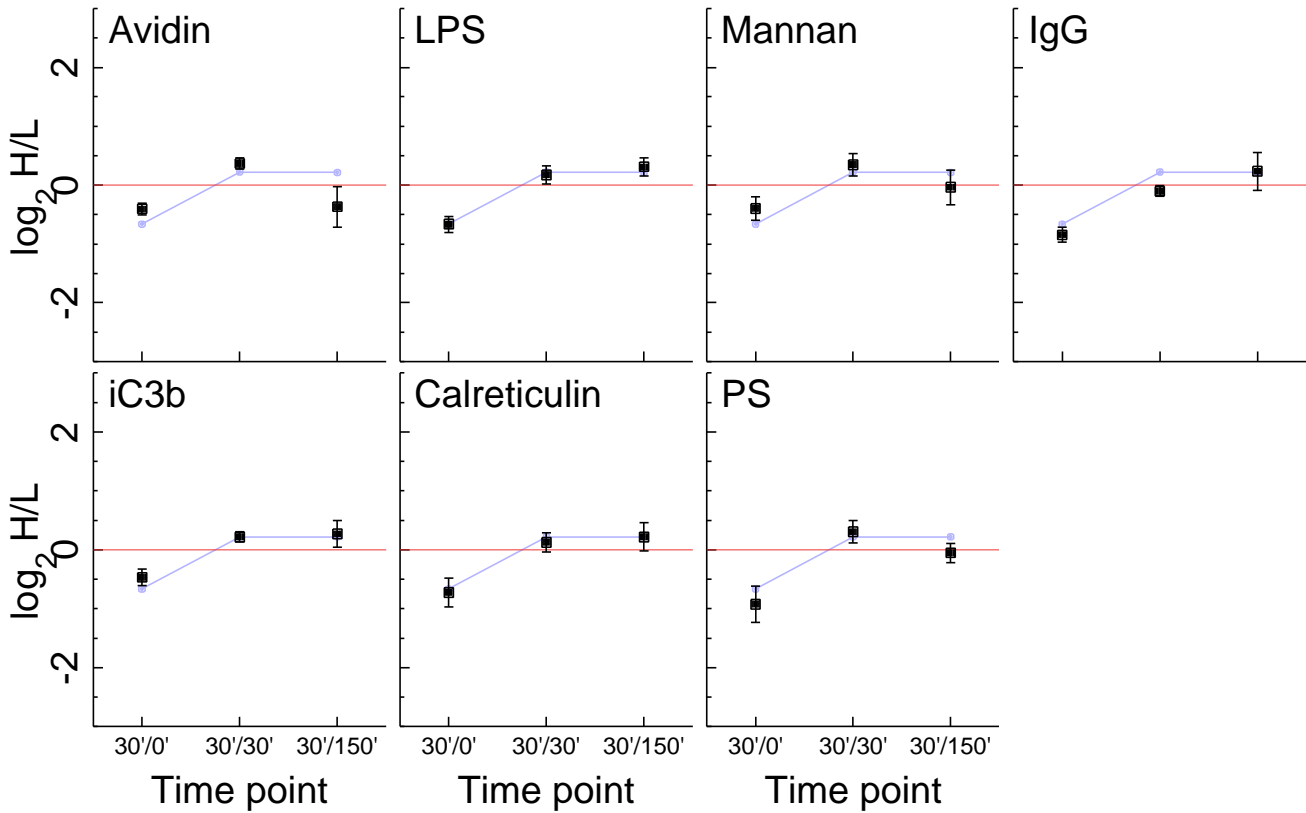

ostf1 (Q62422)

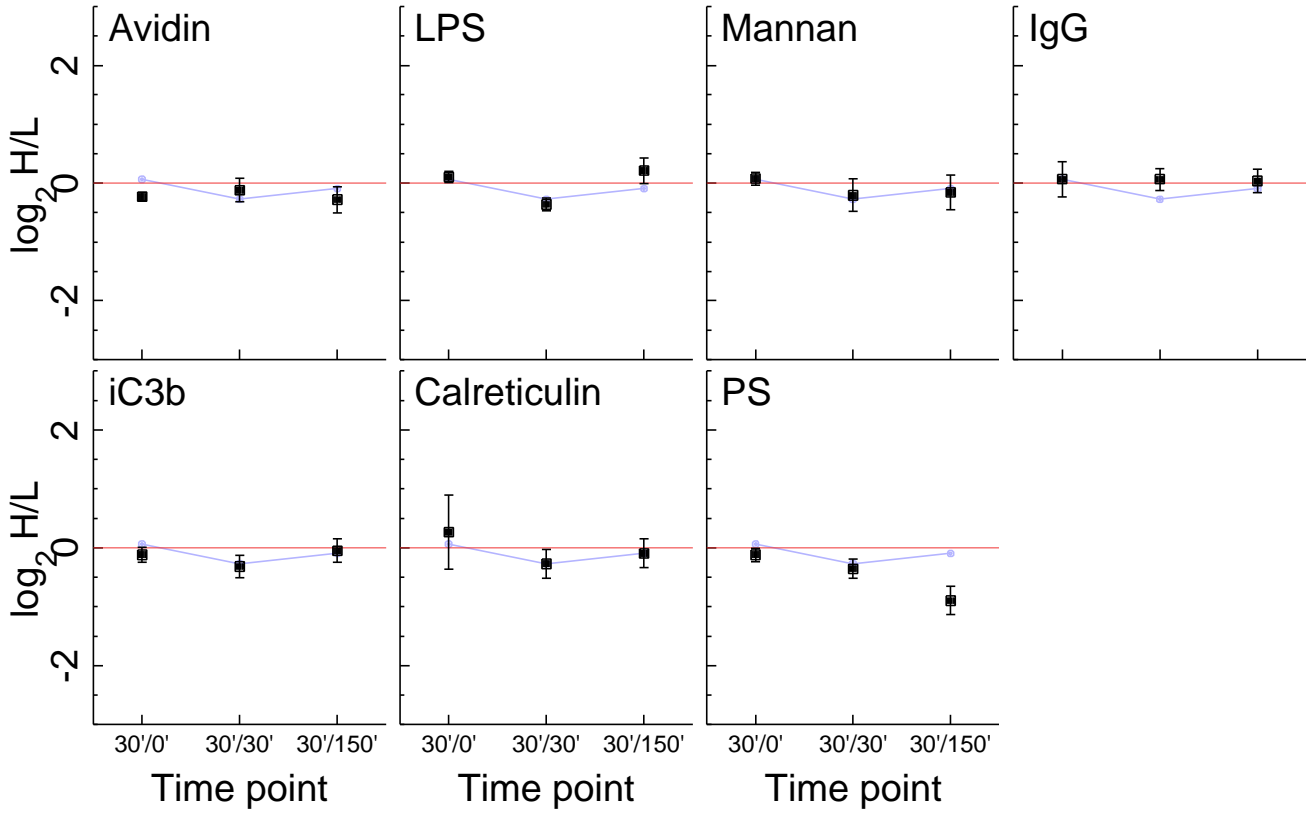

ostm1 (Q8BGT0)

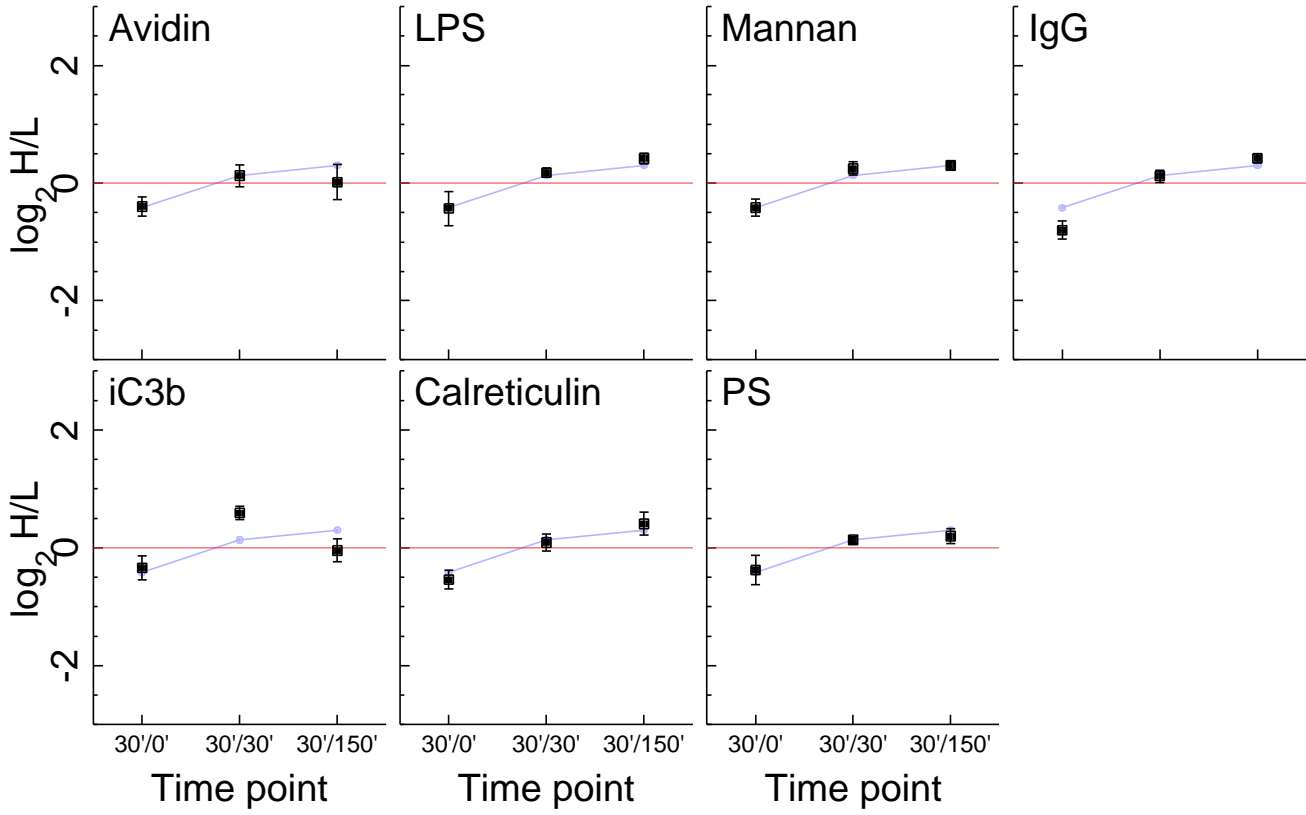



### otud7a (Q8R554)

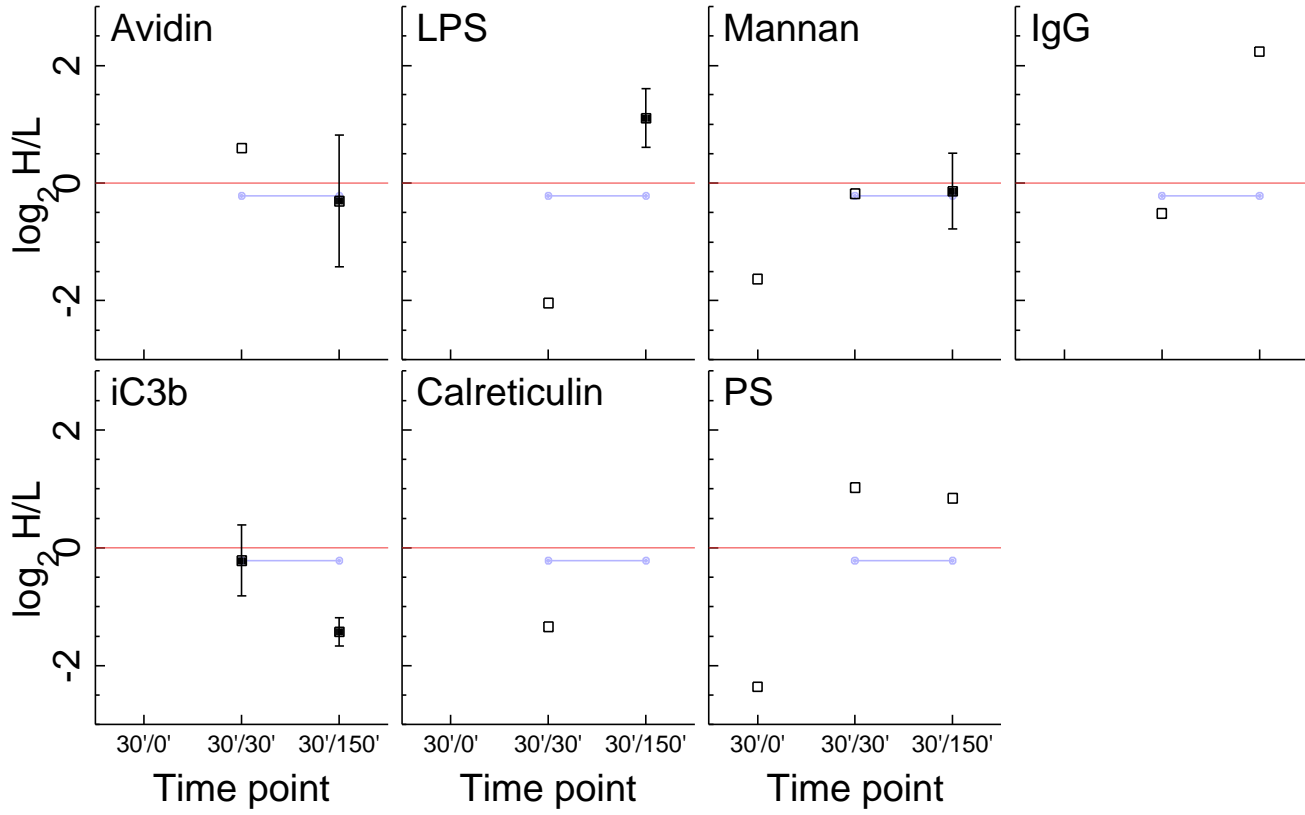

oxct1 (Q9D0K2)

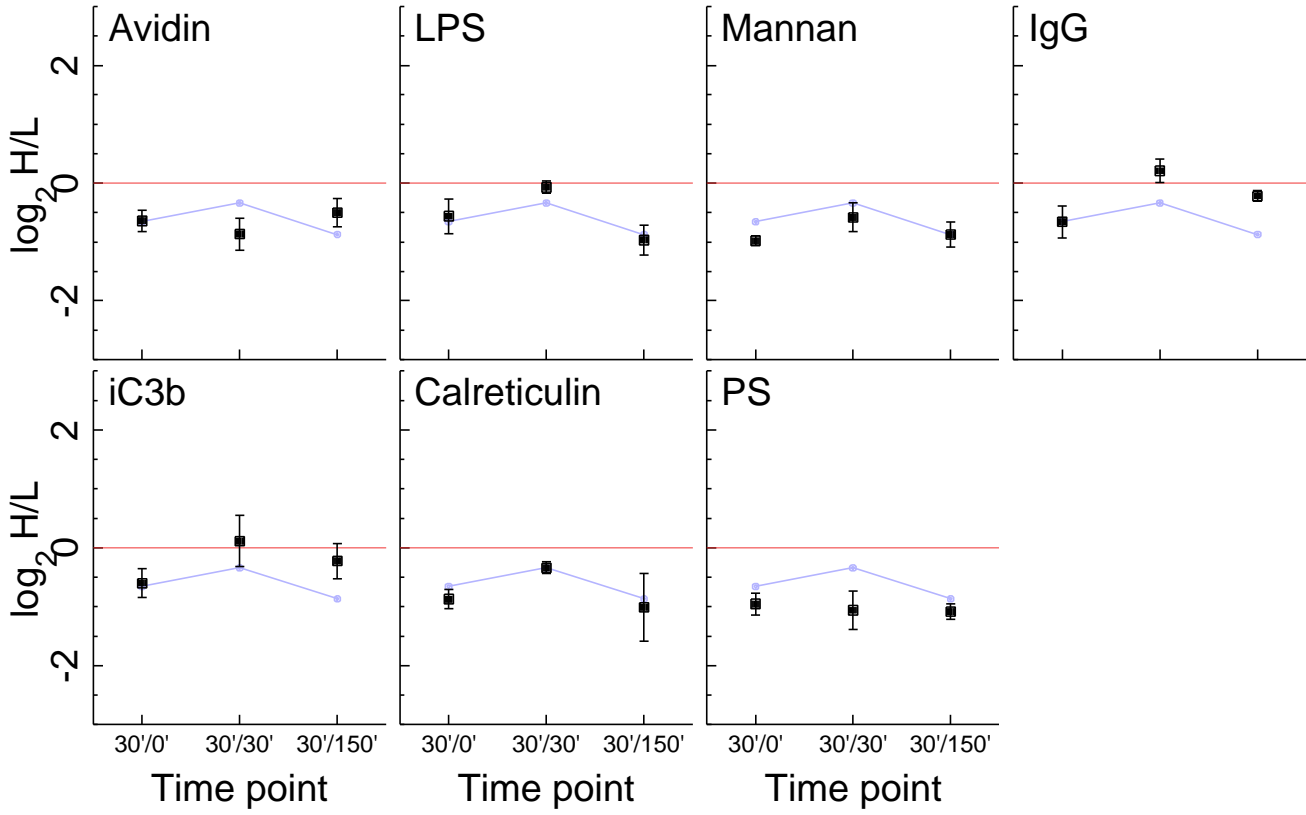

### p10404 (P10404)

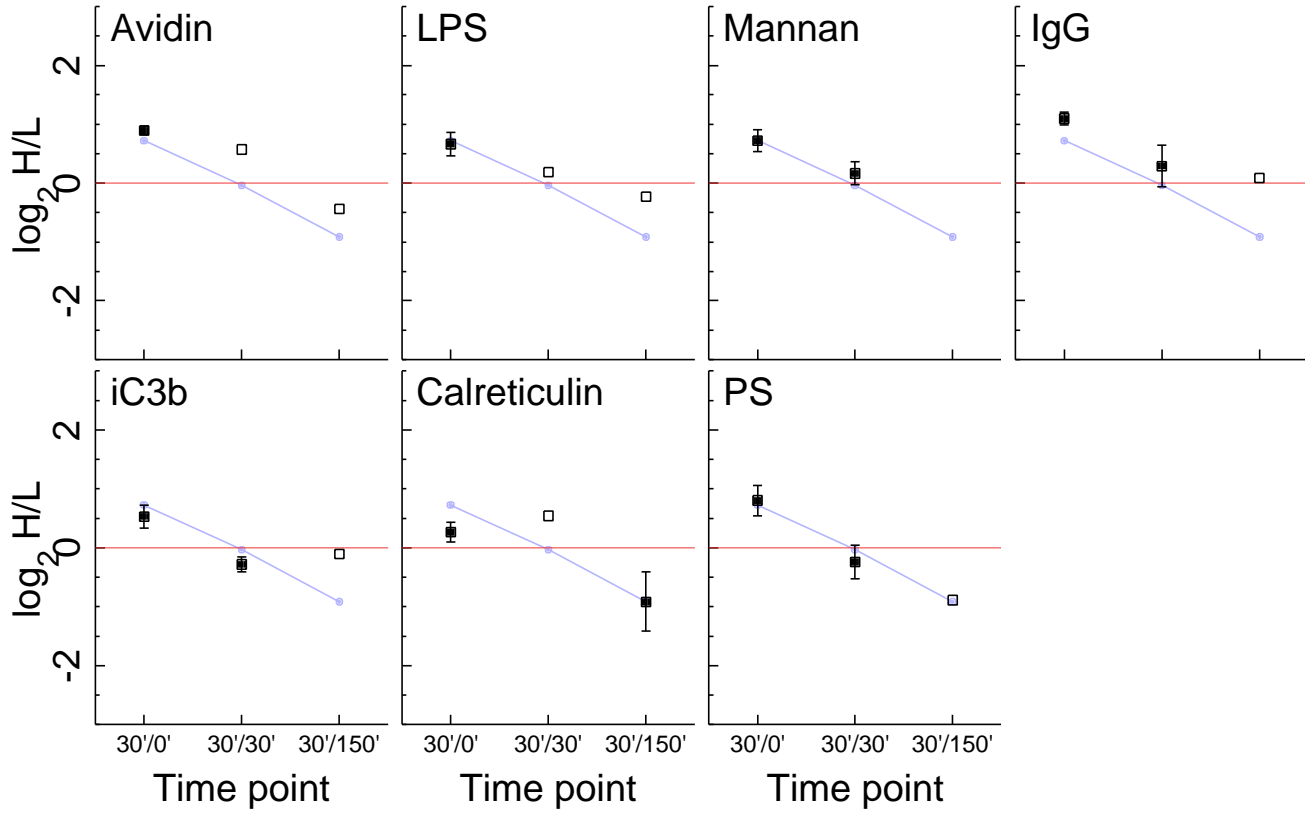

p17047-3 (P17047)

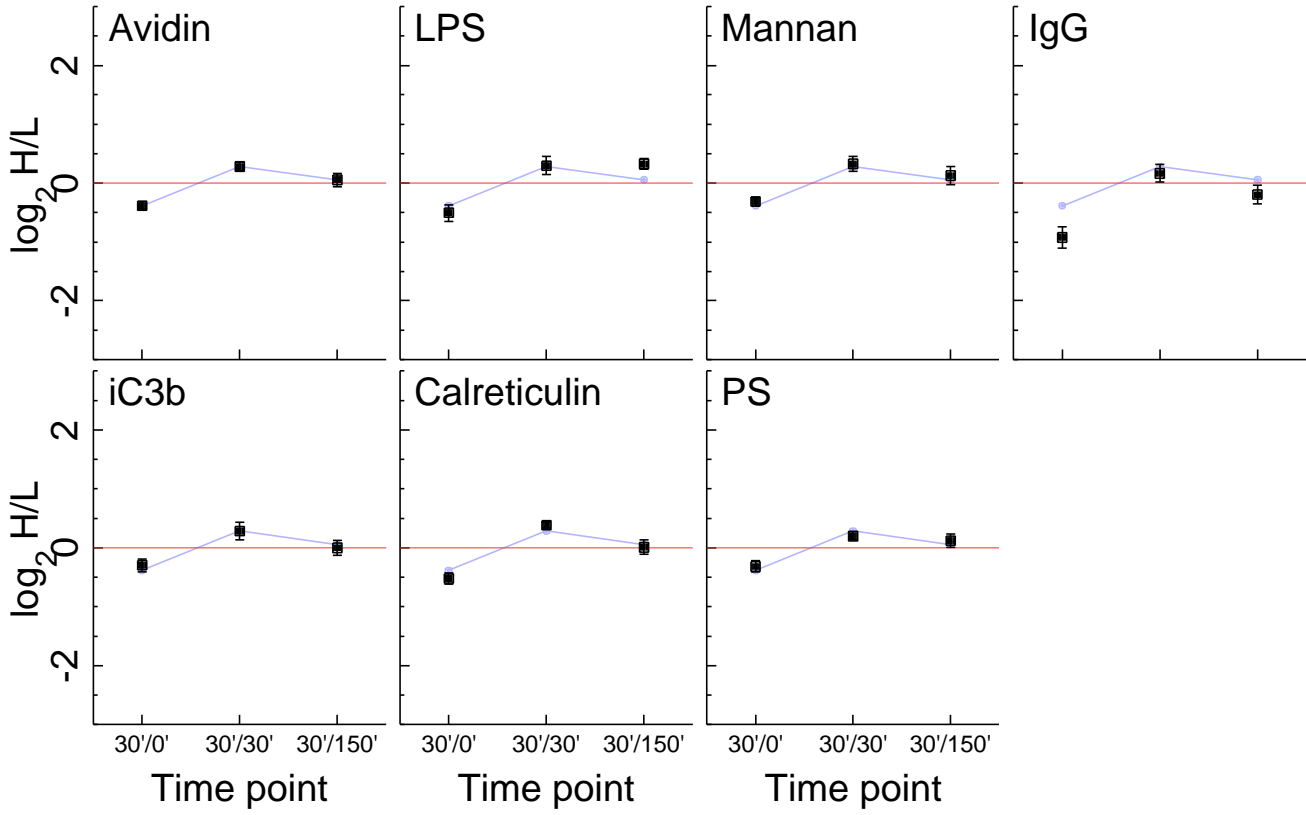

p2rx4 (Q9Z257)

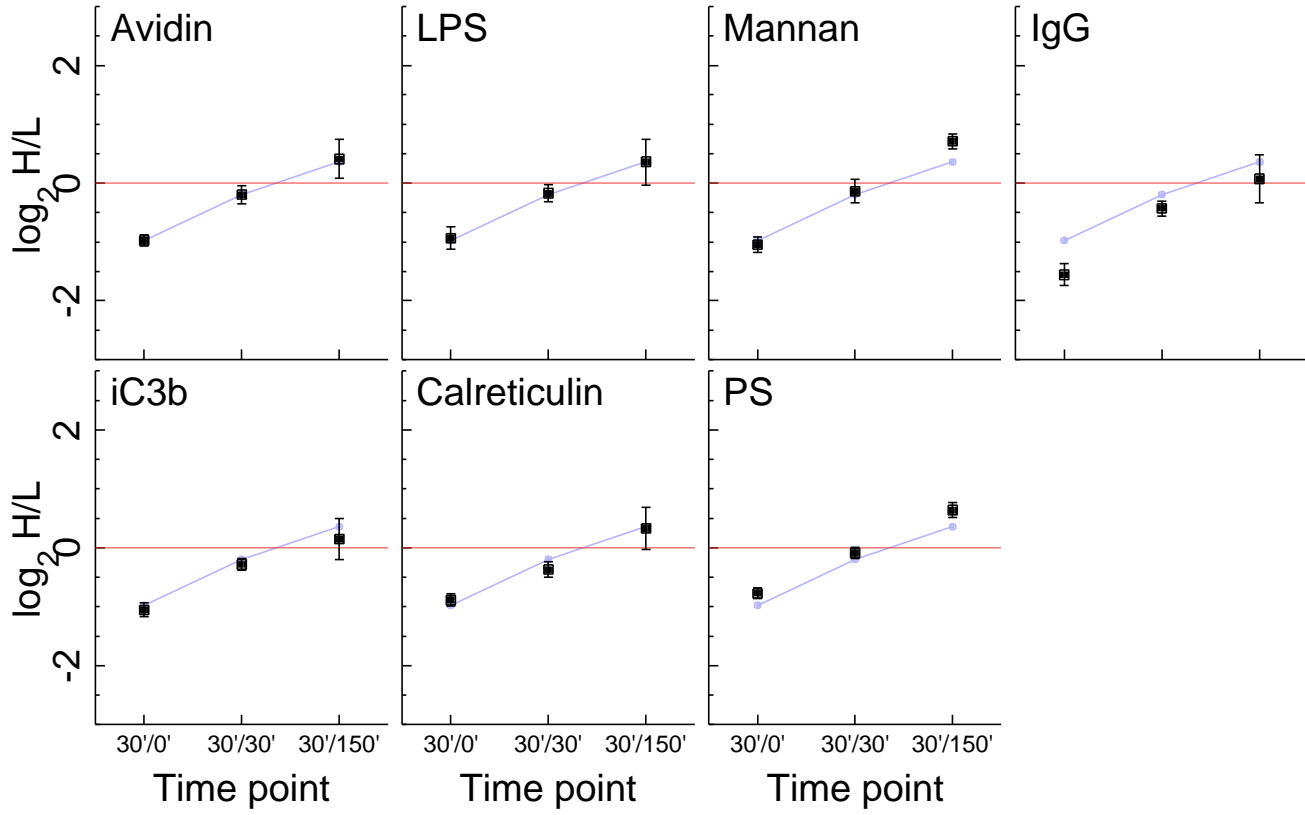

### p2rx7 (Q9Z1M0)

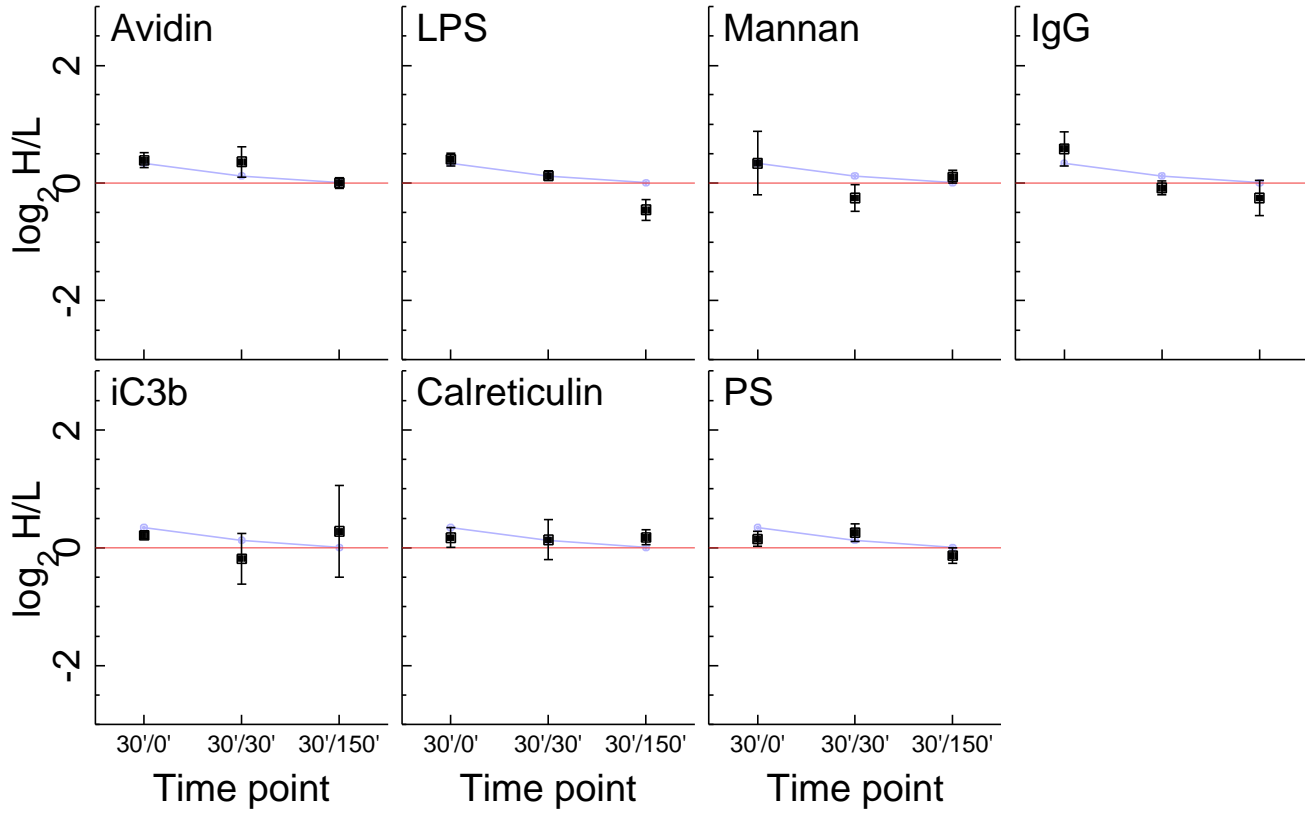

p33monox (Q9DBN4)

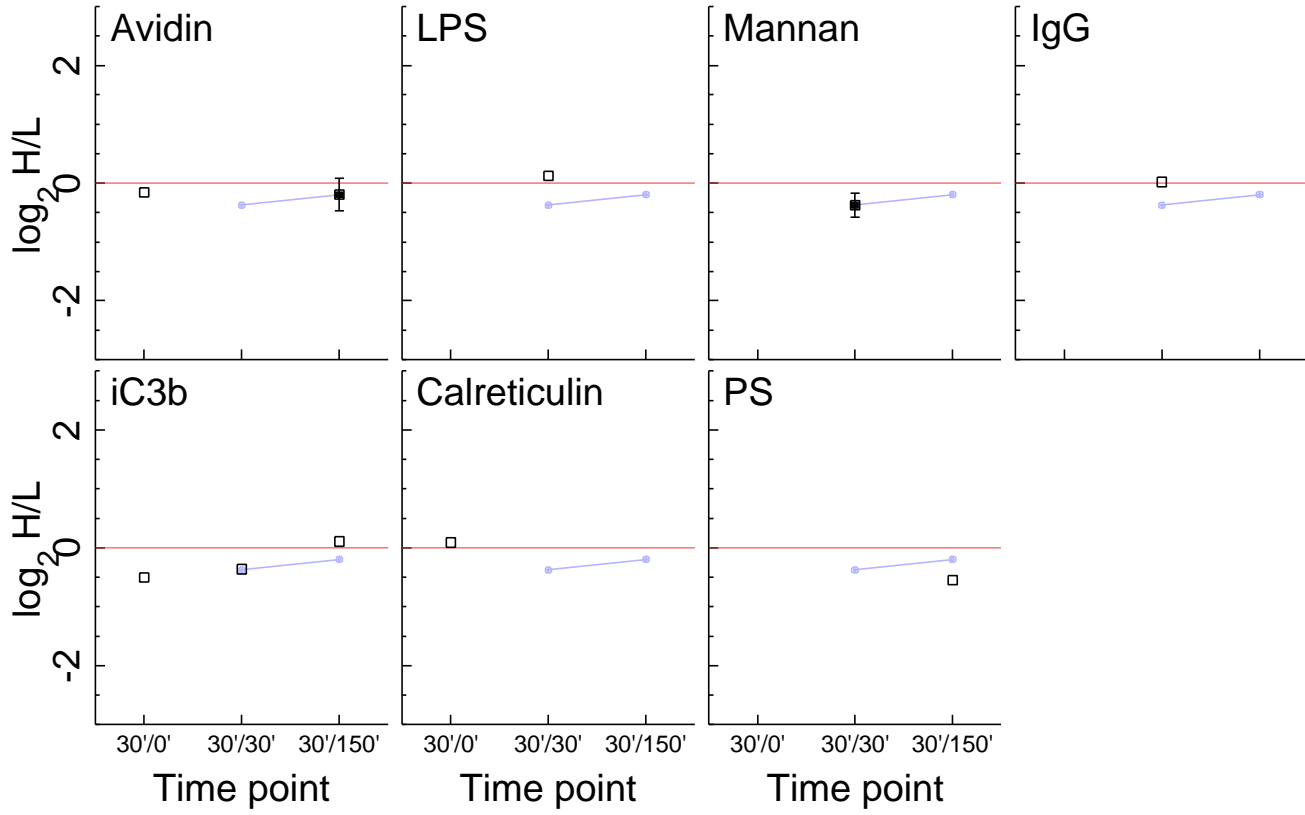

p4hb (P09103)

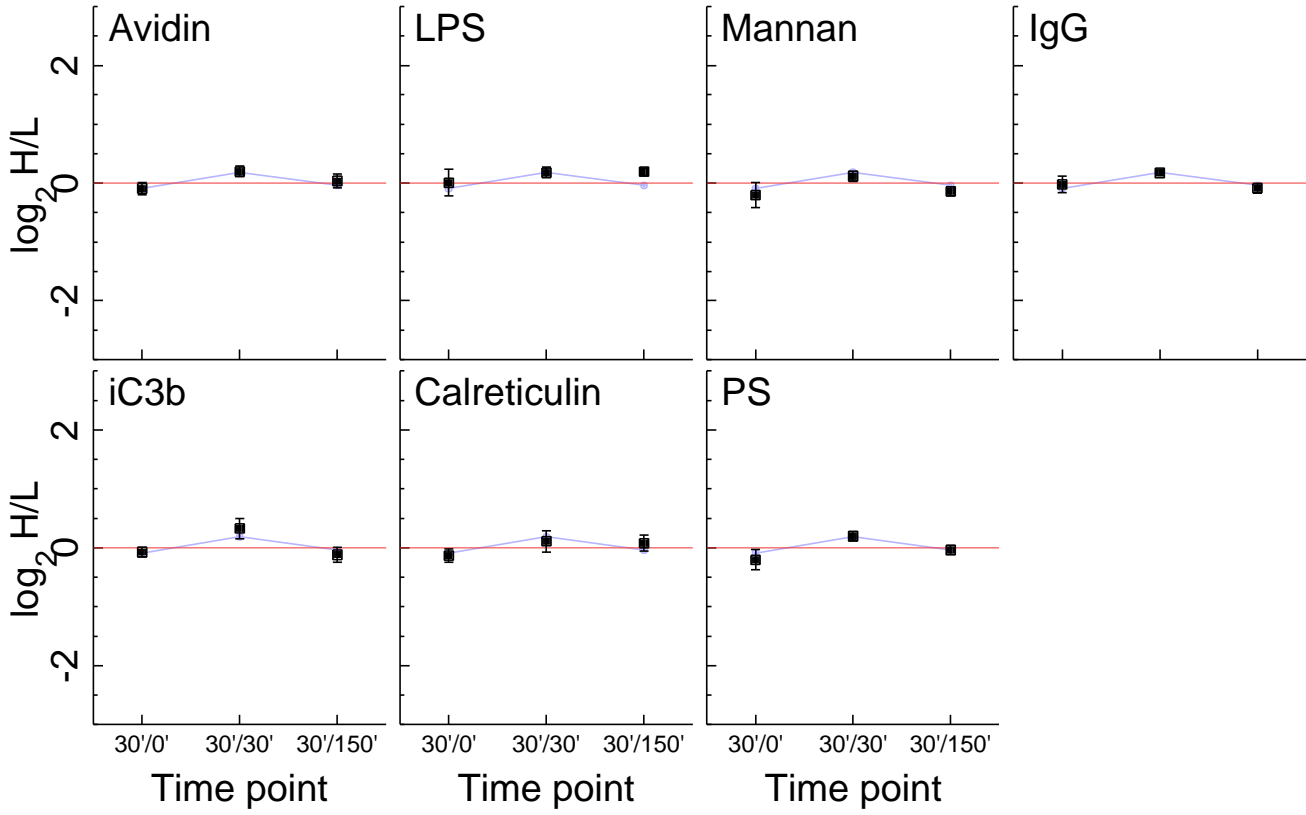



pa2g4 (P50580)

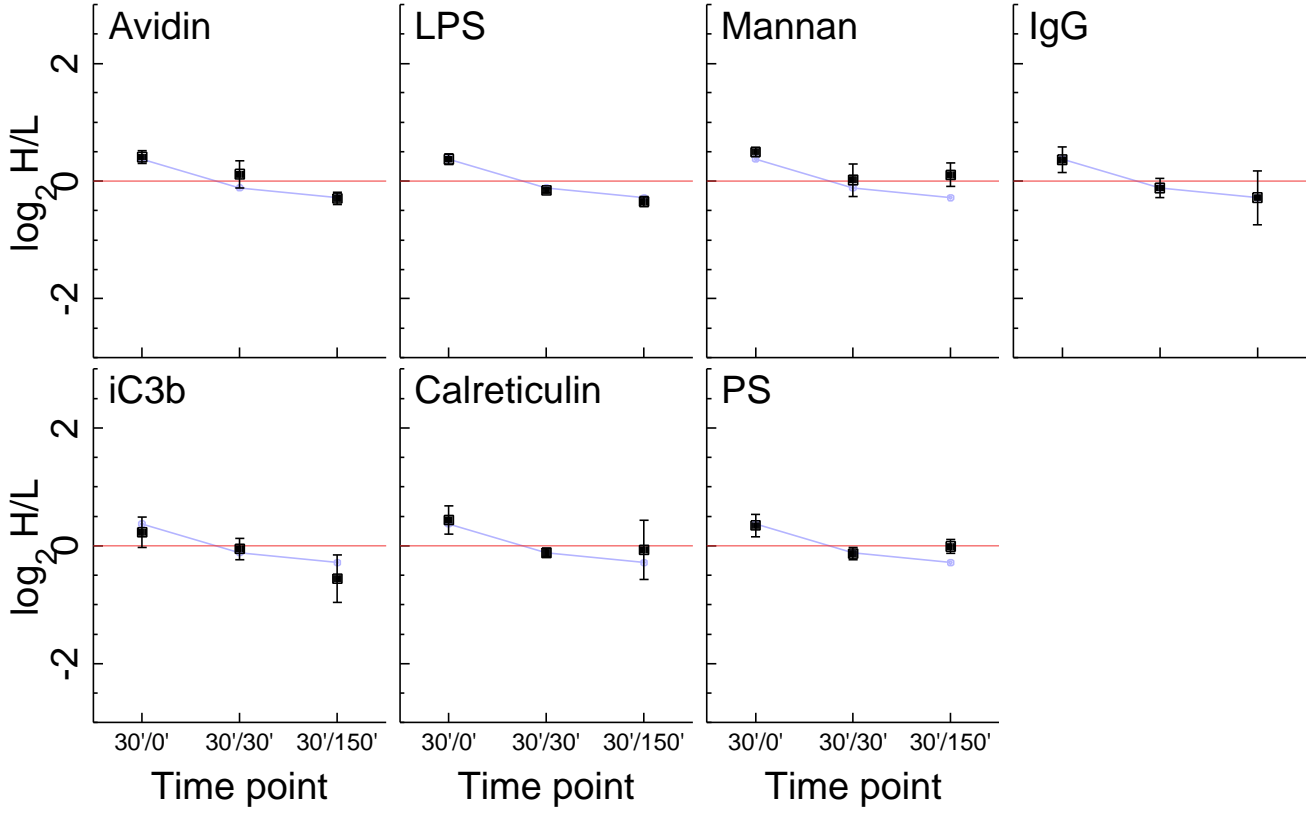

### pabpc1 (P29341)

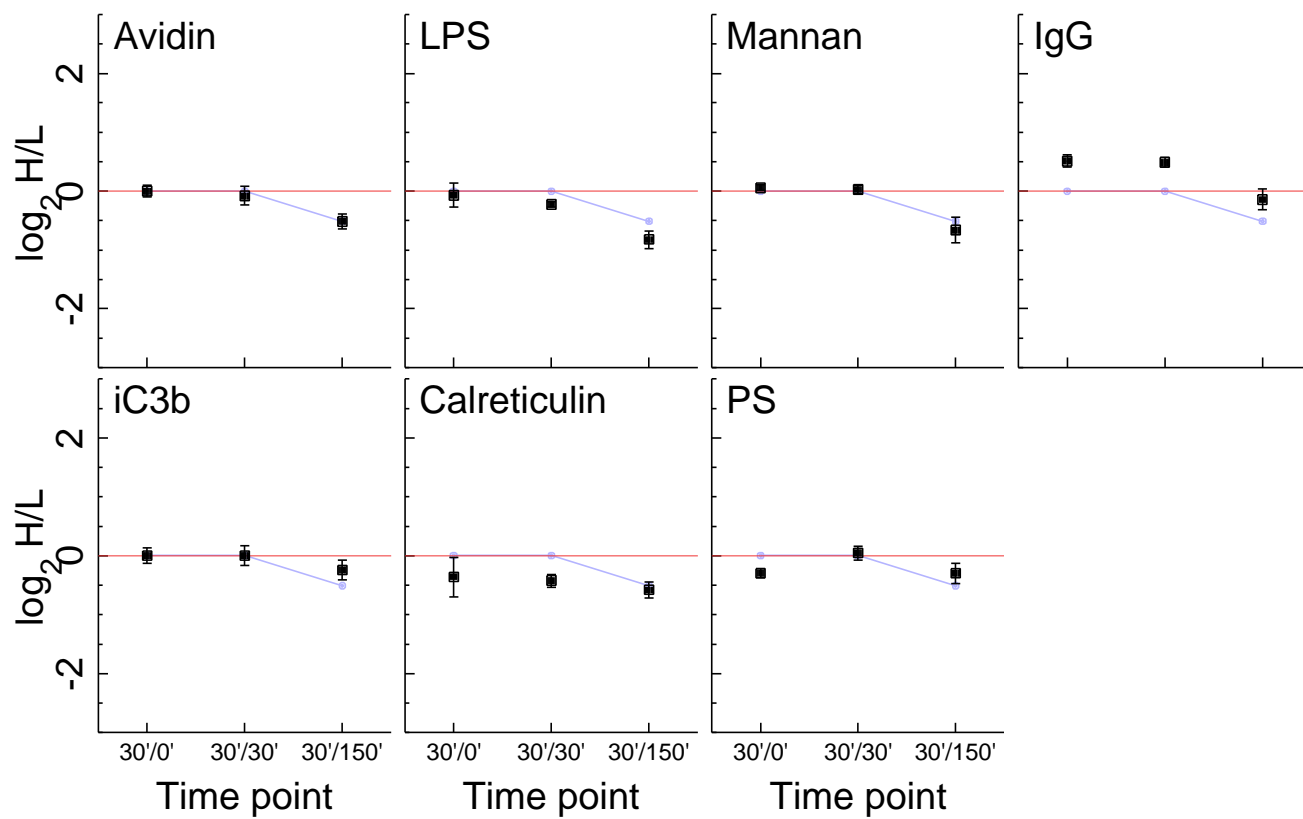

paics (Q9DCL9)

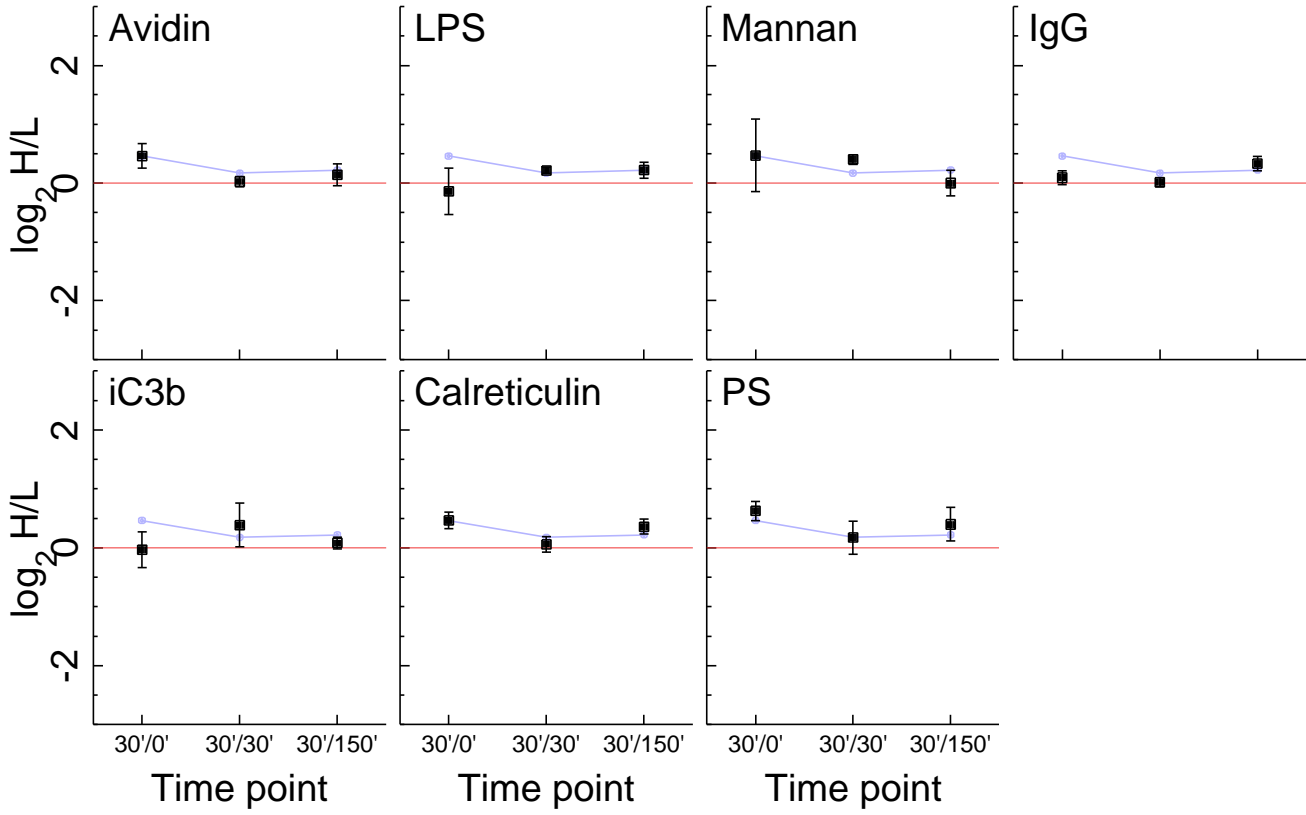

paip1 (F6Y616)

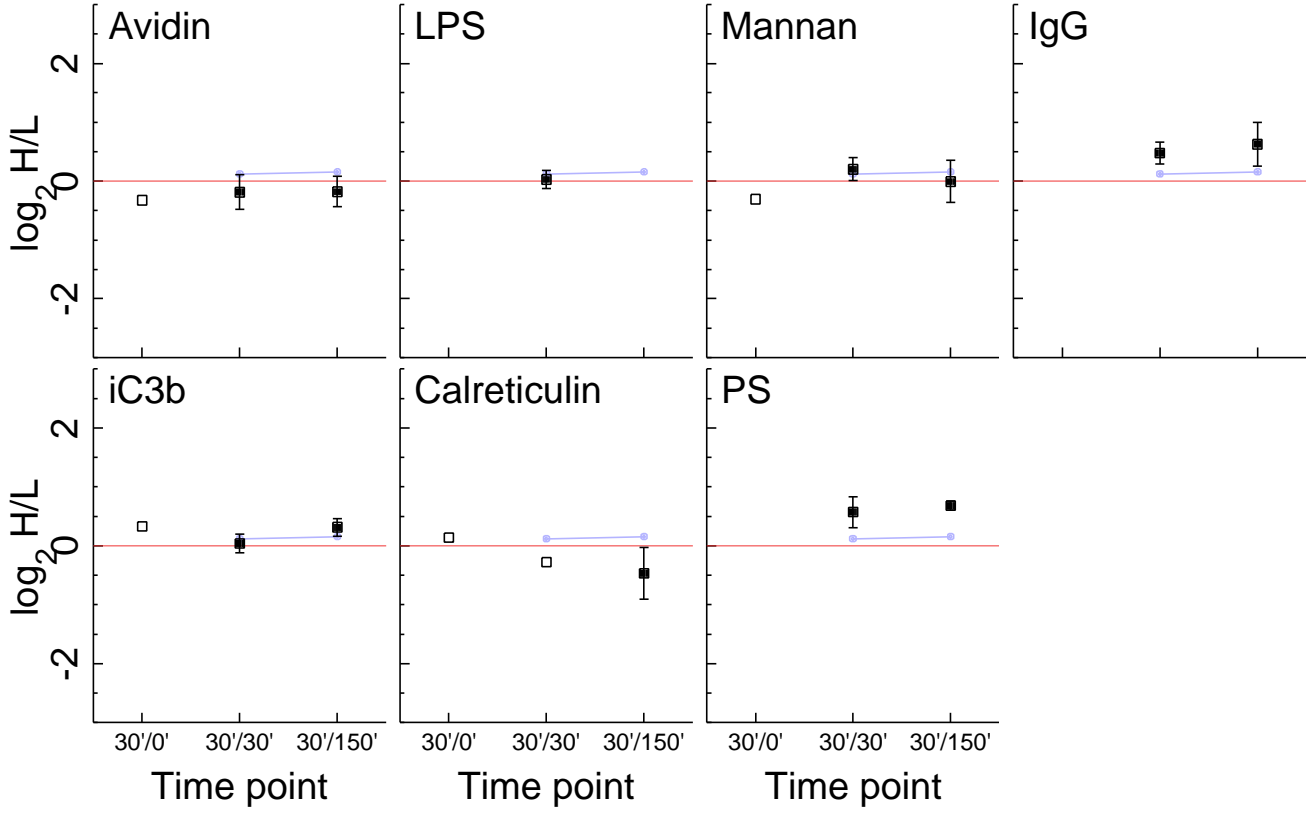

### pak2 (Q8CIN4)

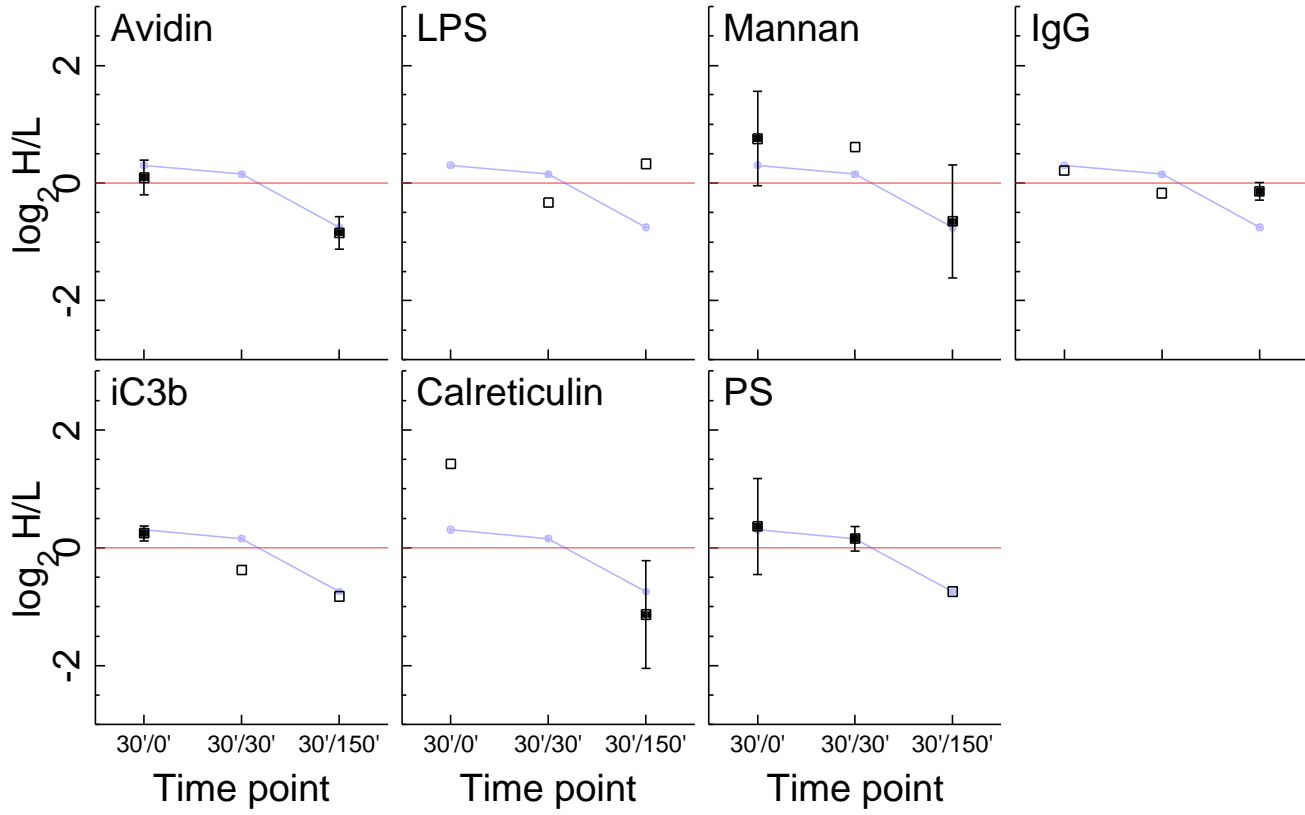

### parp14 (Q2EMV9)

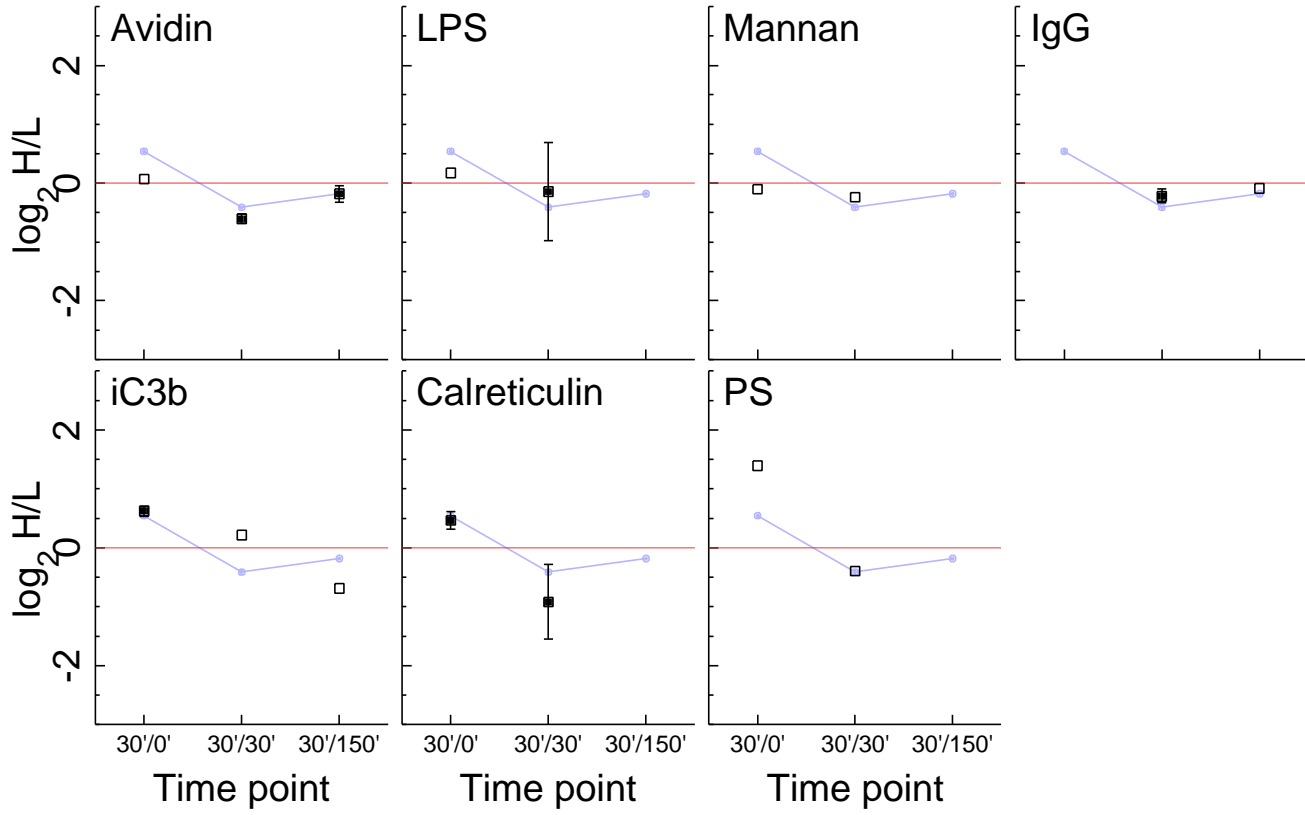

parp1 (Q921K2)

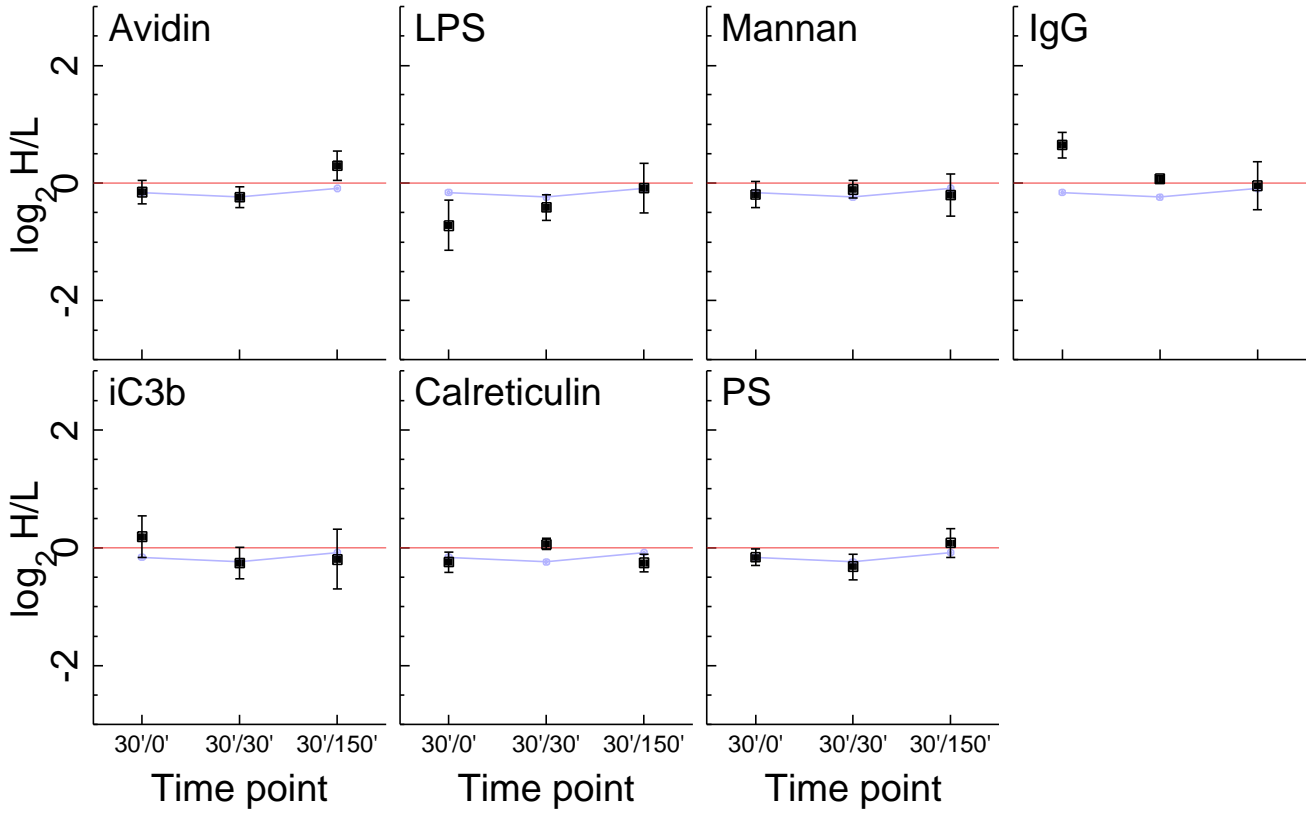

pcbp1 (P60335)

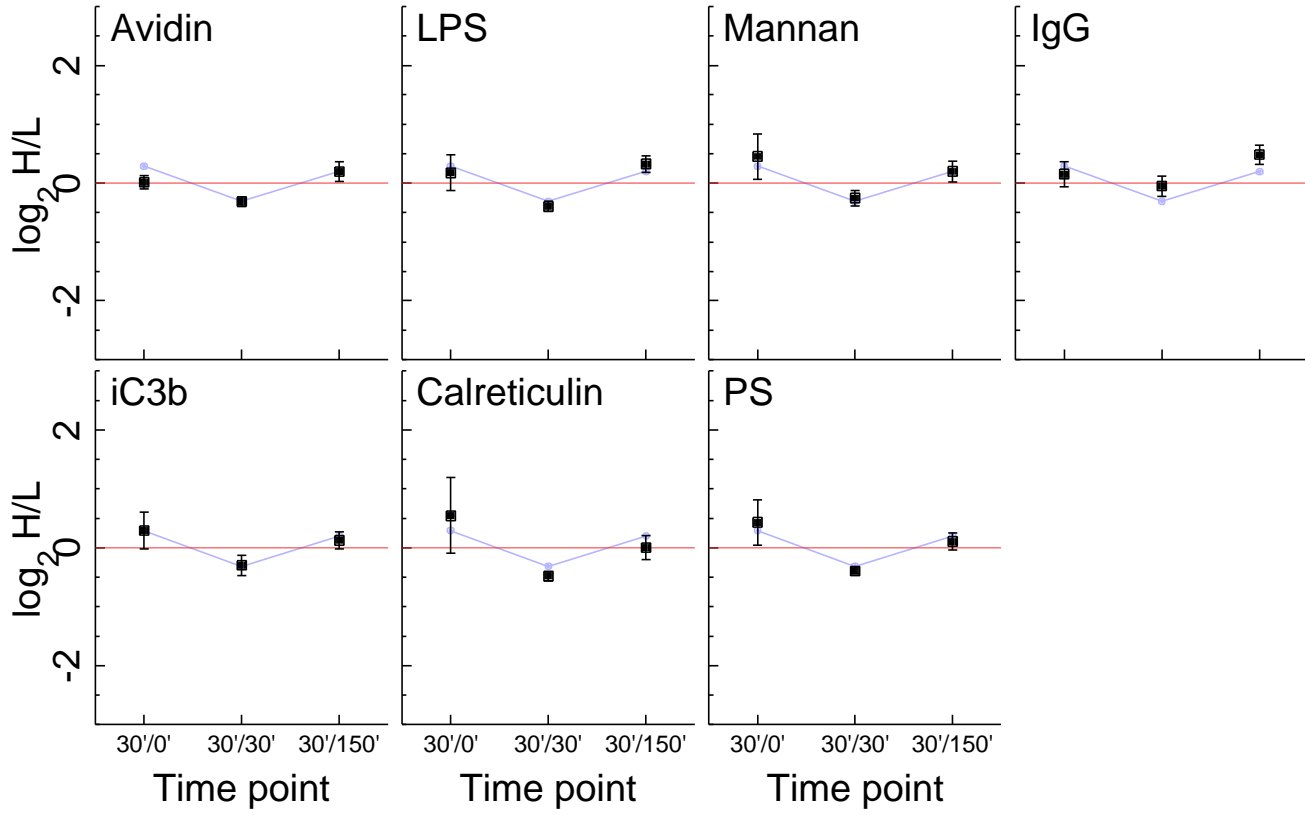



pcbp2 (Q61990)

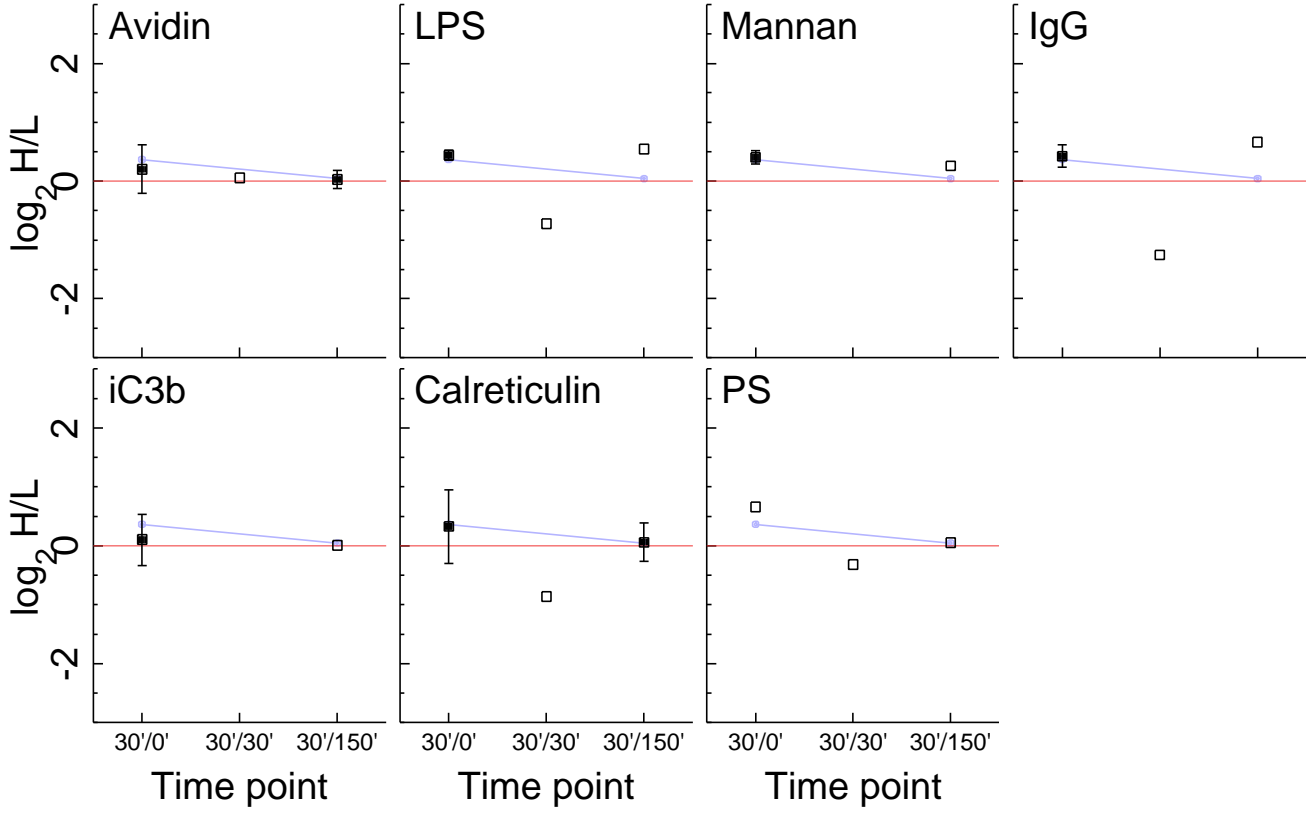

### pcdhb2 (Q91Y00)

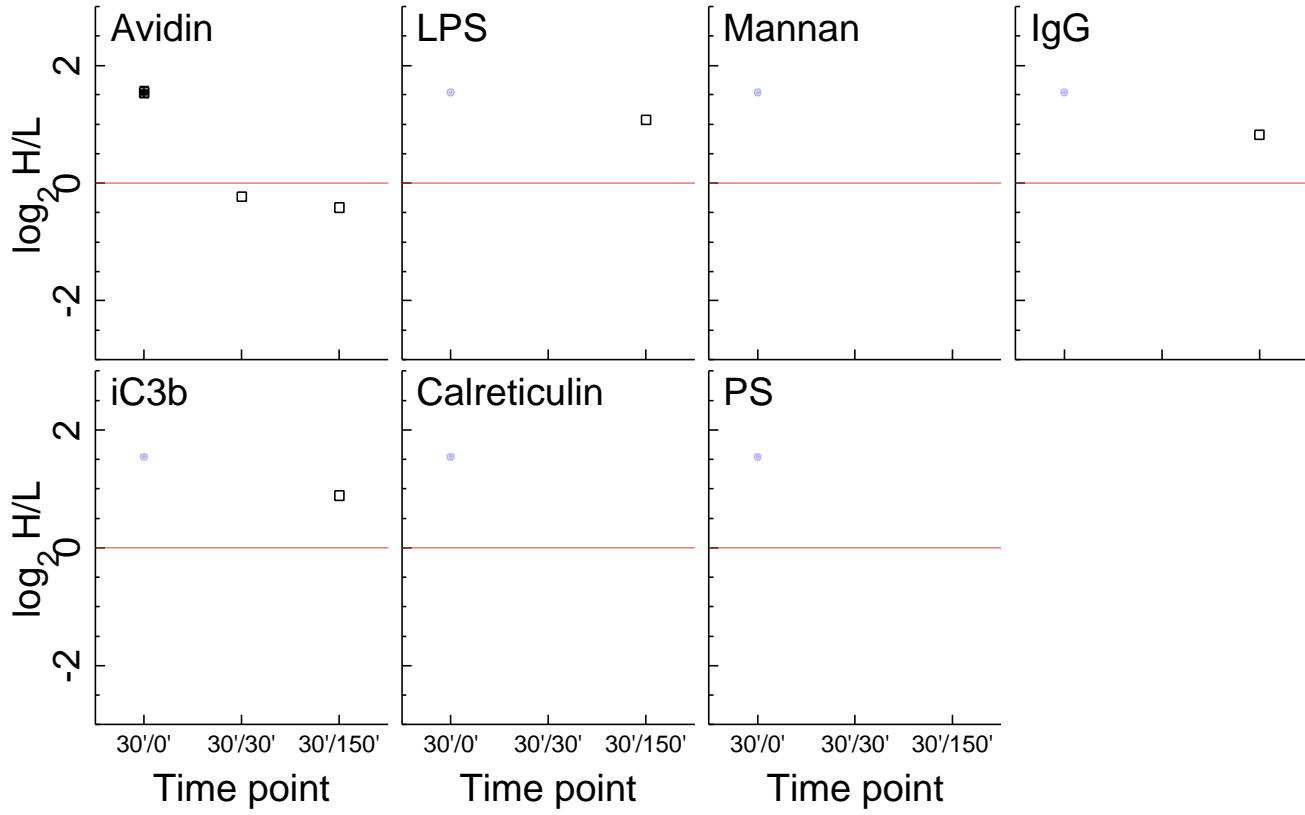

pck2 (Q8BH04)

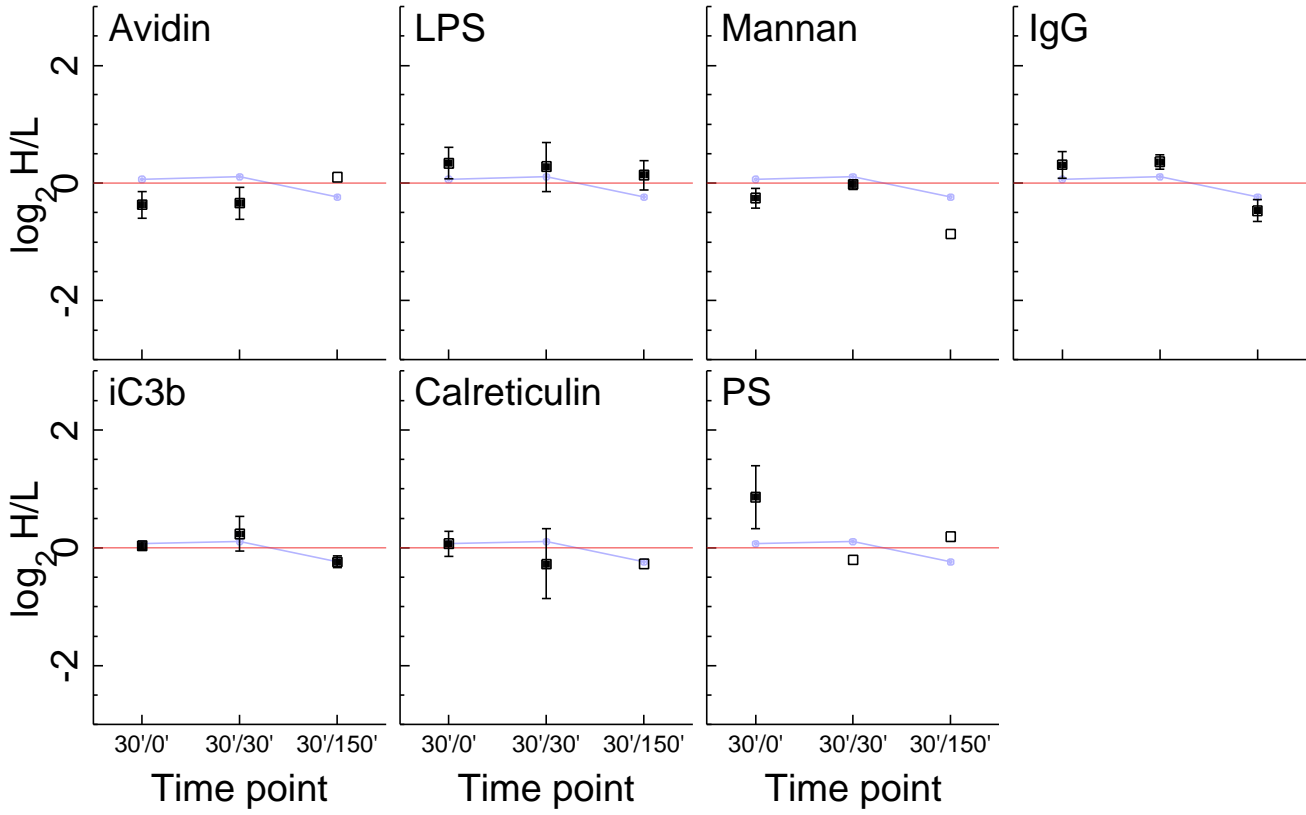

pcmt1 (E0CYV0)

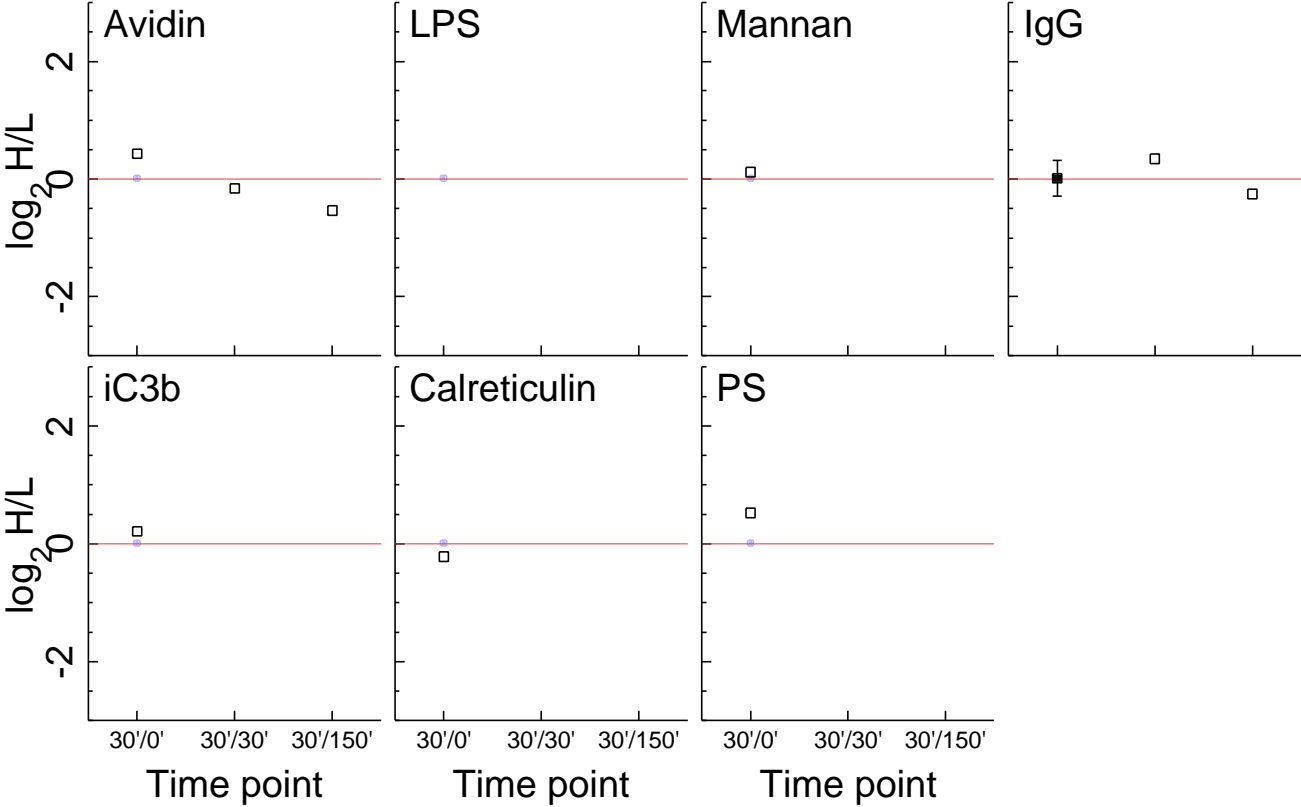

pcna (J3QQ26)

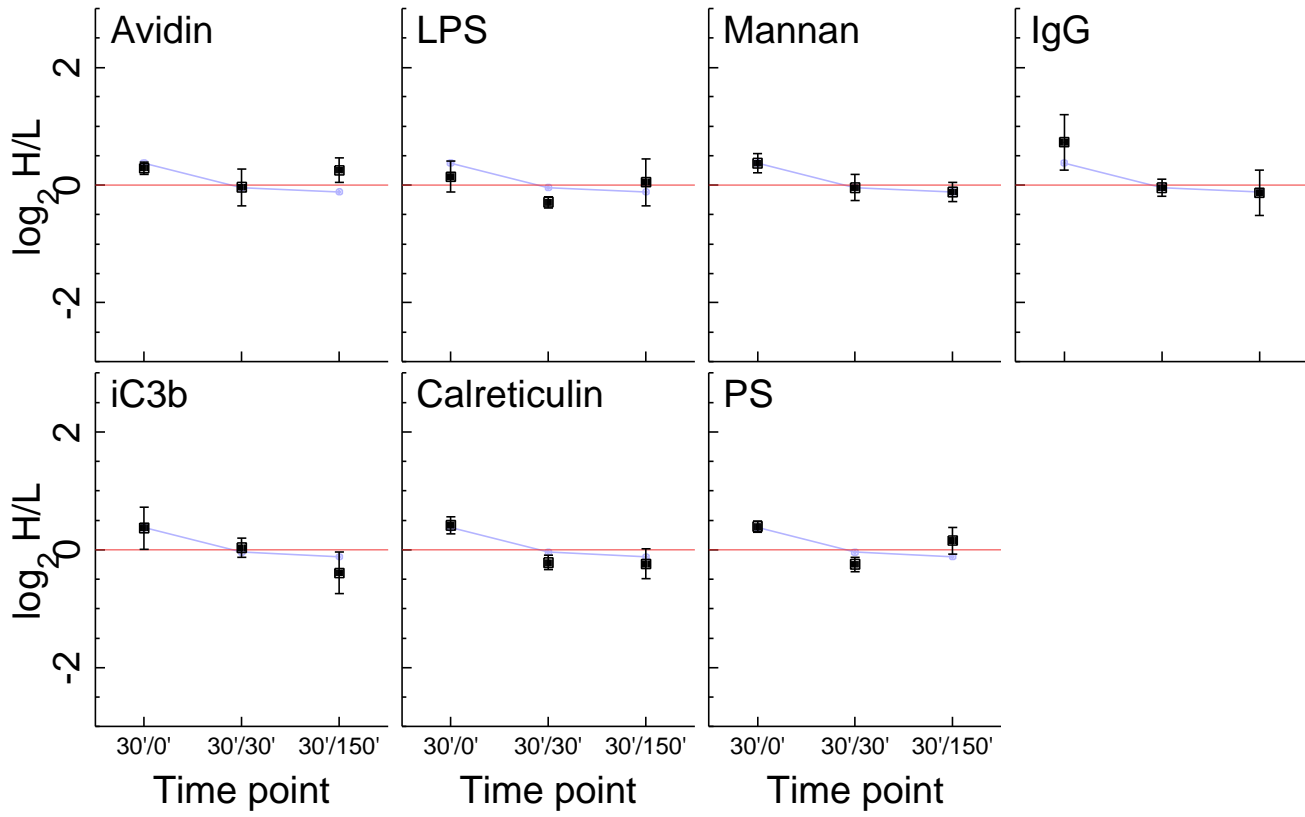

pcnp (Q6P8I4)

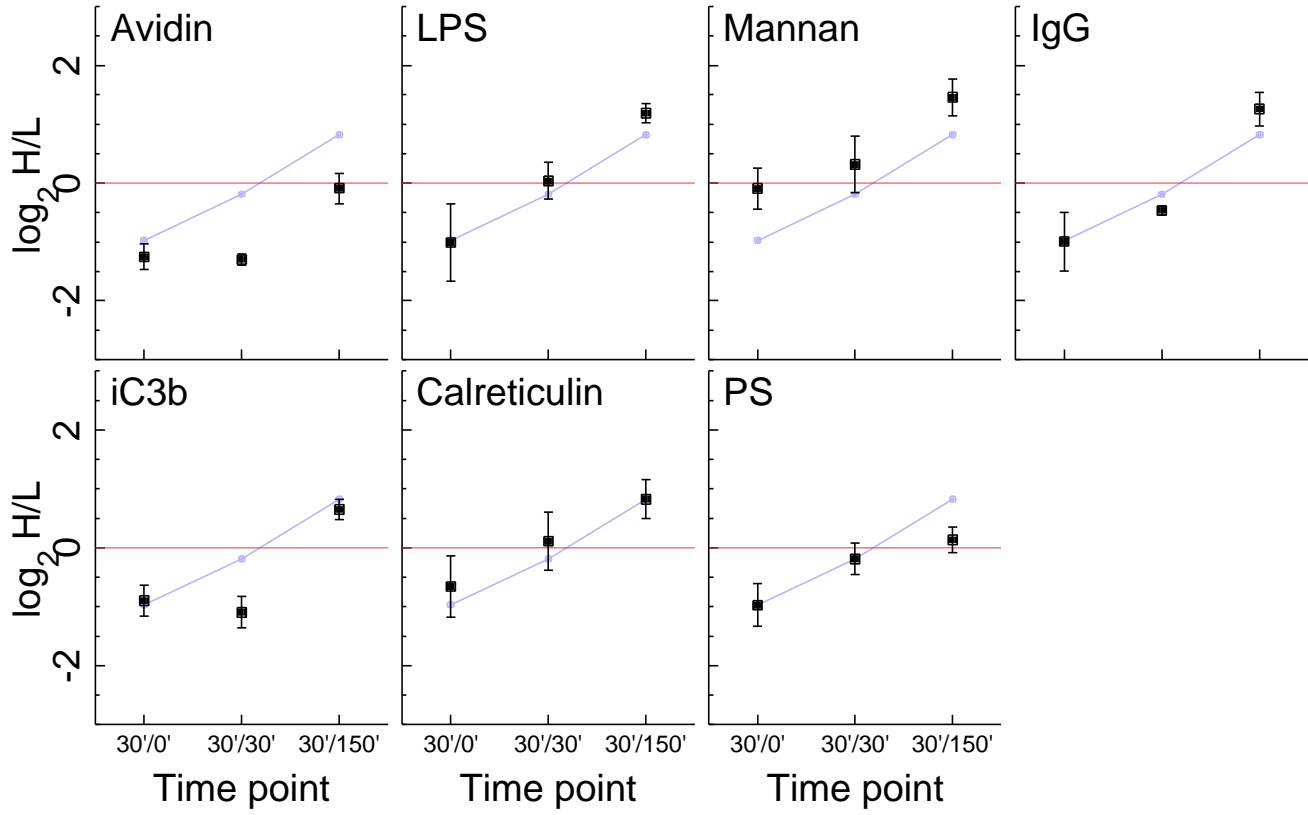

pcyox1l (Q8C7K6)

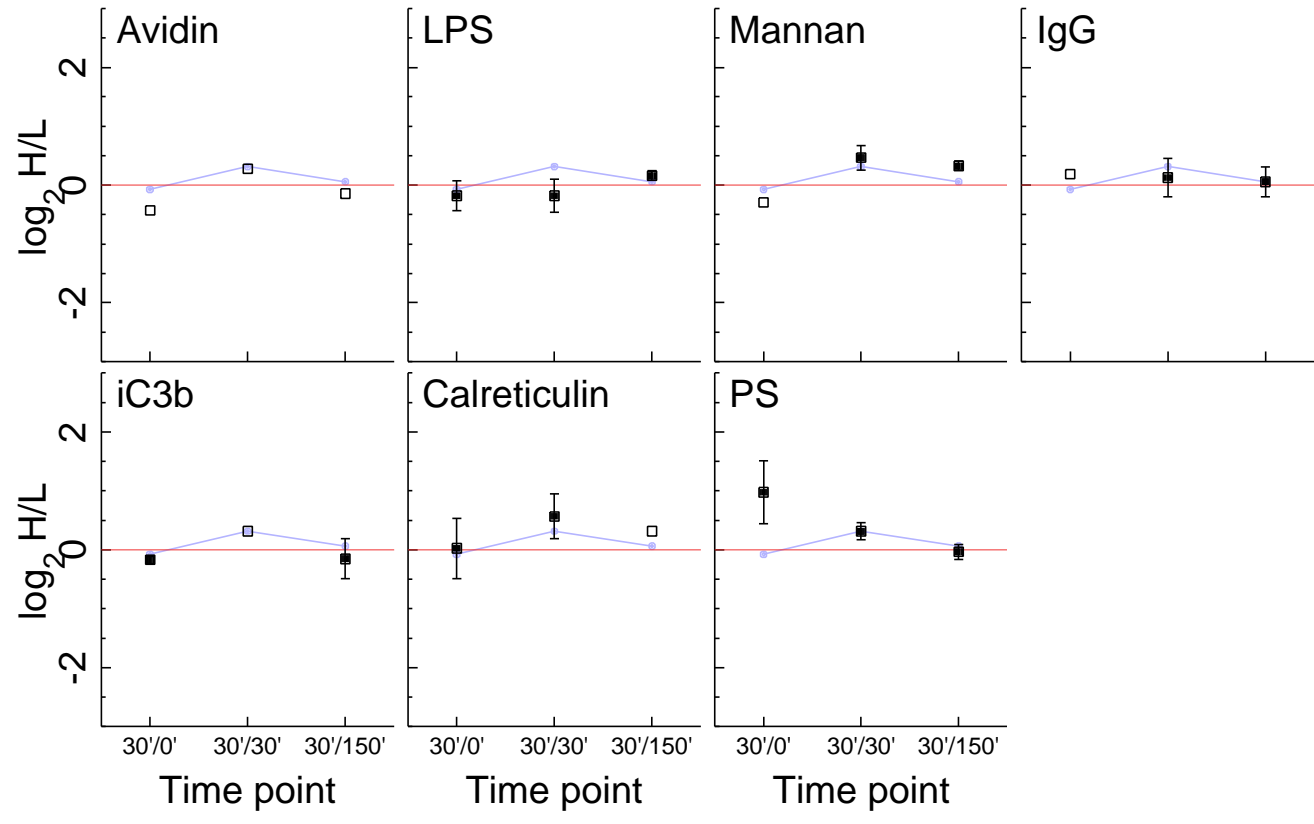

pcyox1 (Q9CQF9)

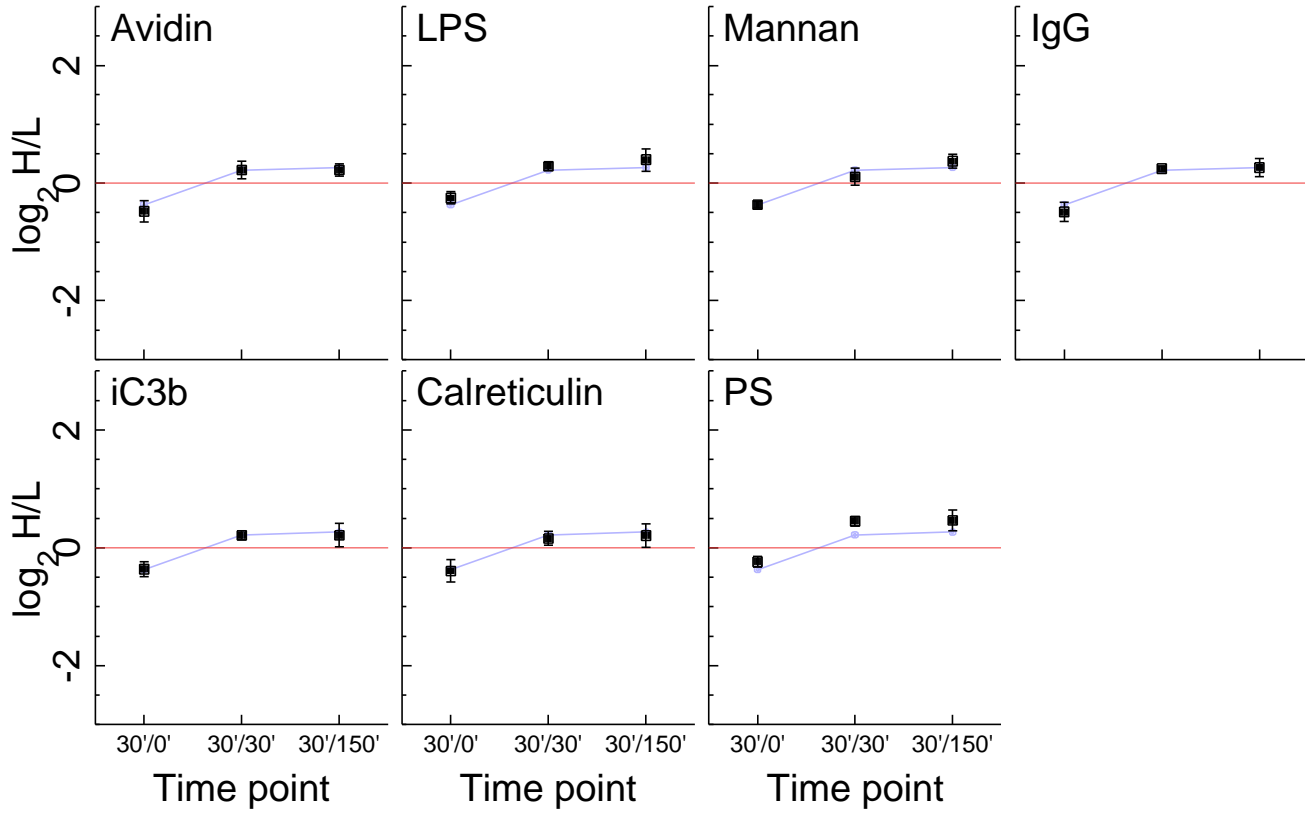



pcyt1a (P49586)

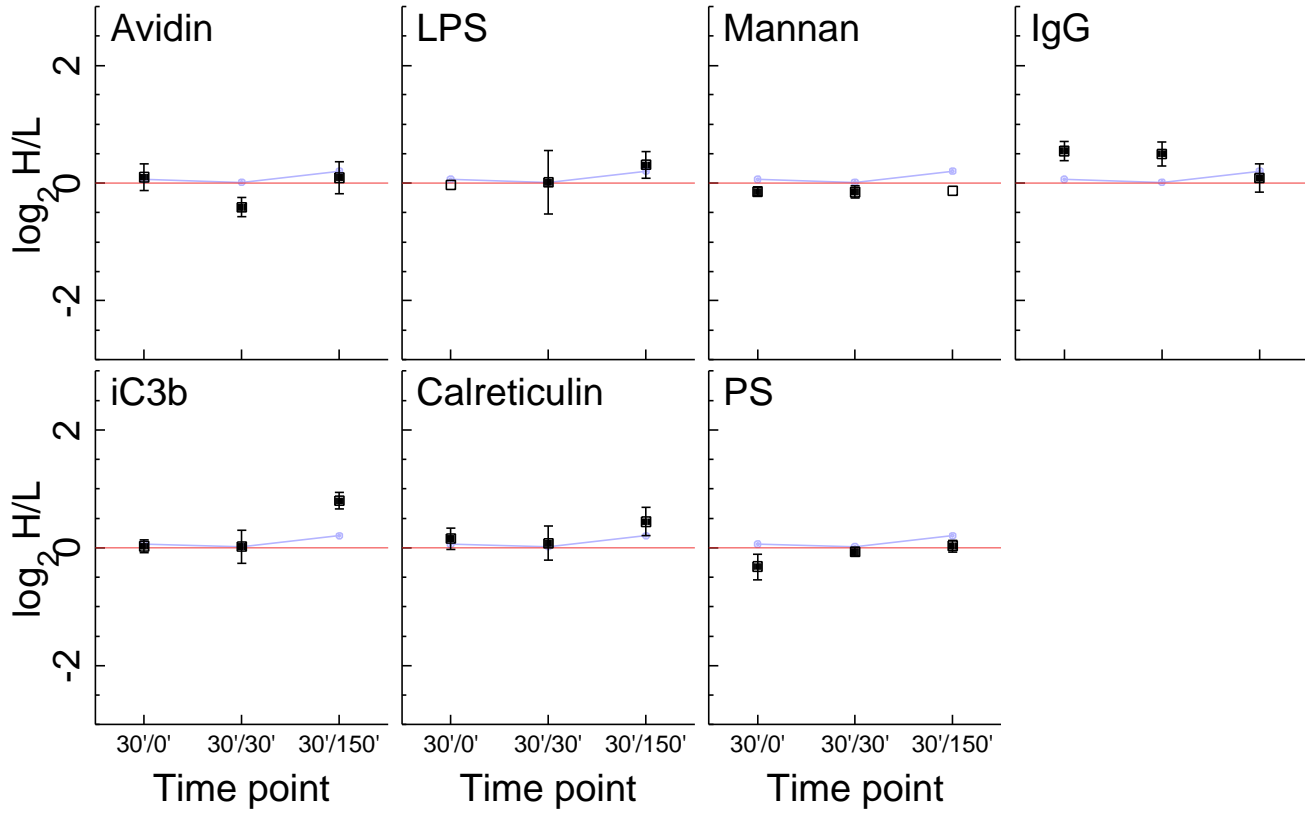

pdcd6ip (Q9WU78)

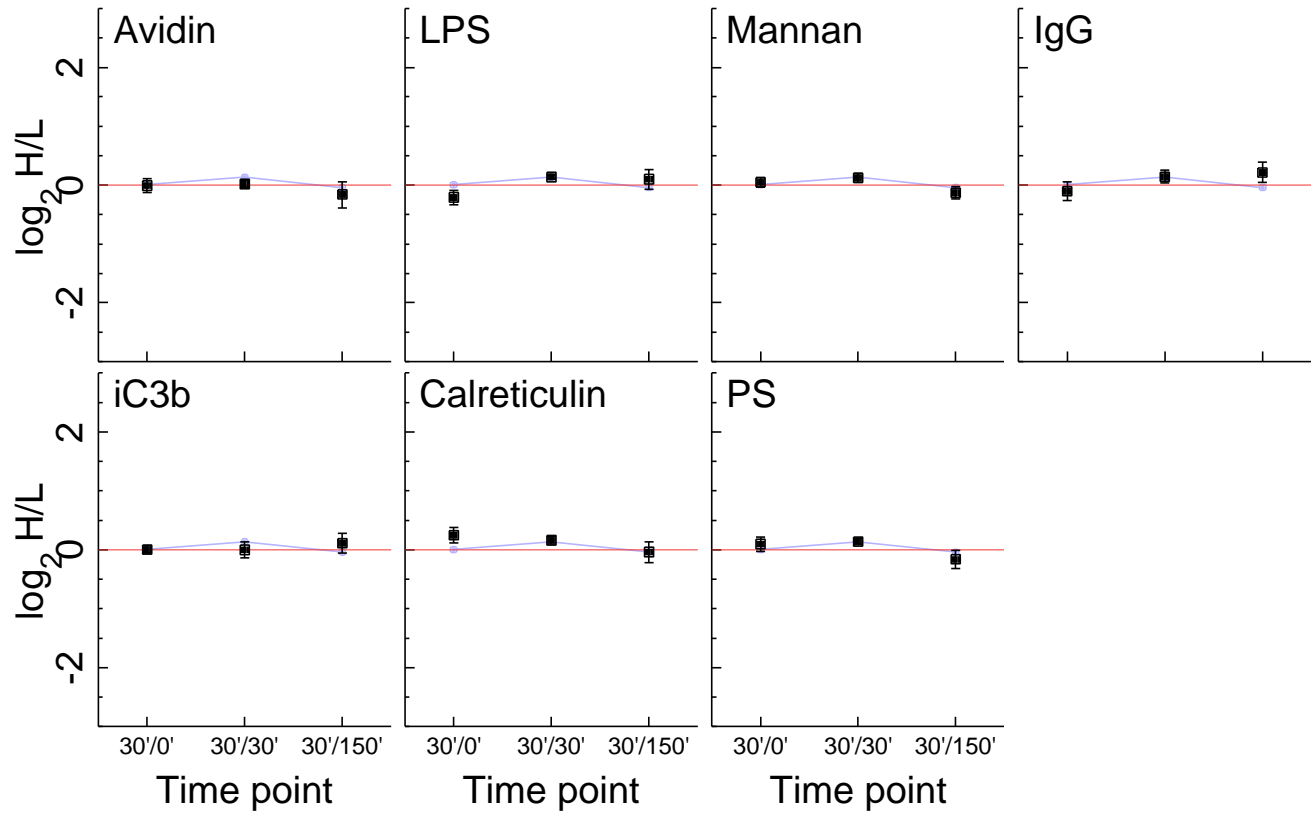

pdcd6 (P12815)

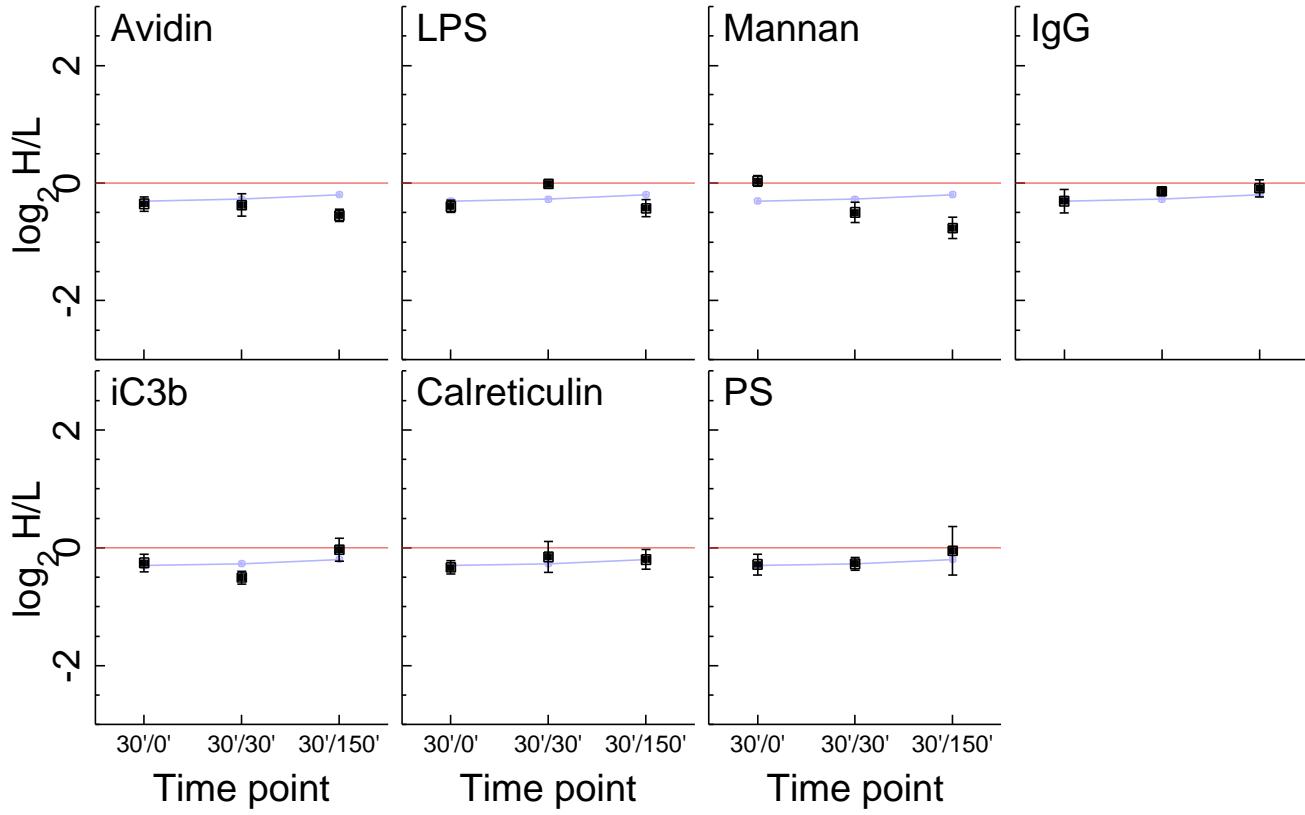

pdha1 (P35486)

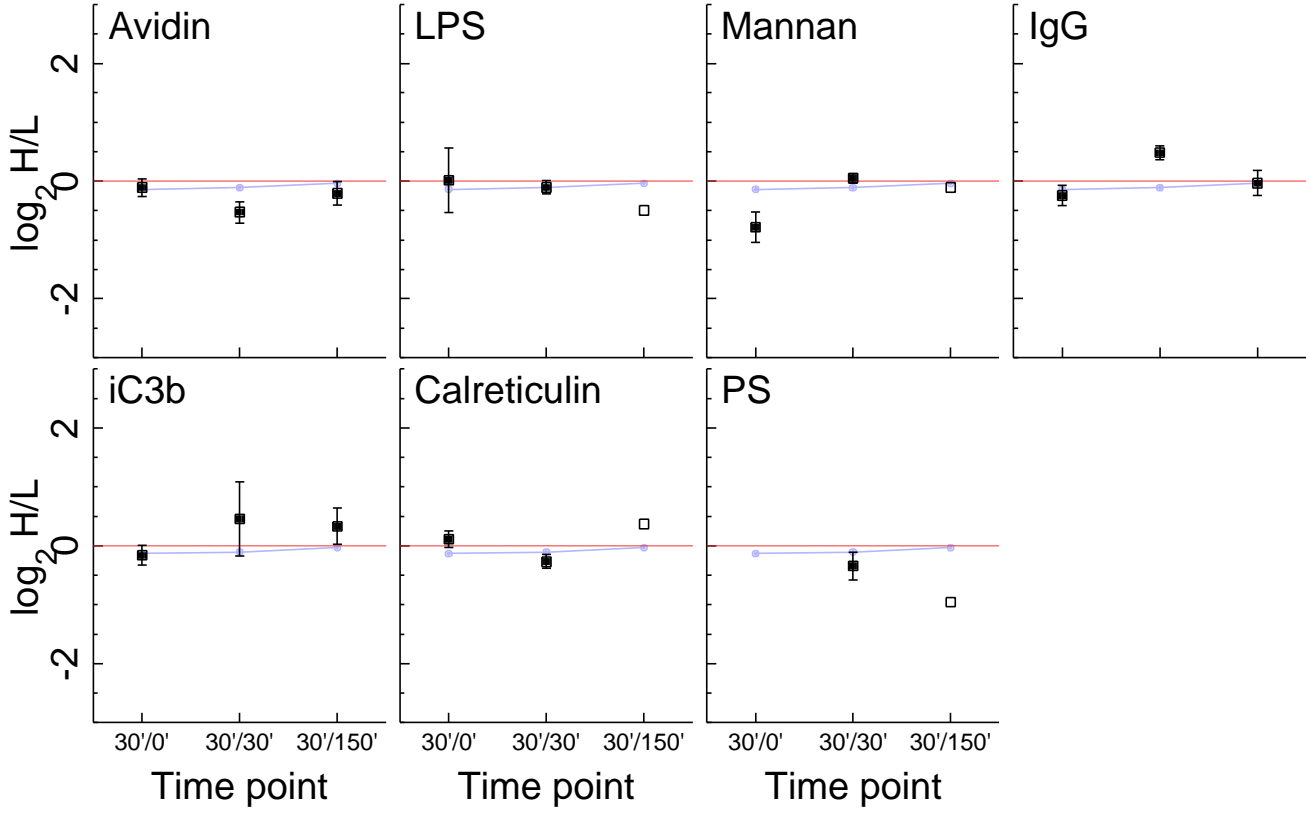

pdhb (Q9D051)

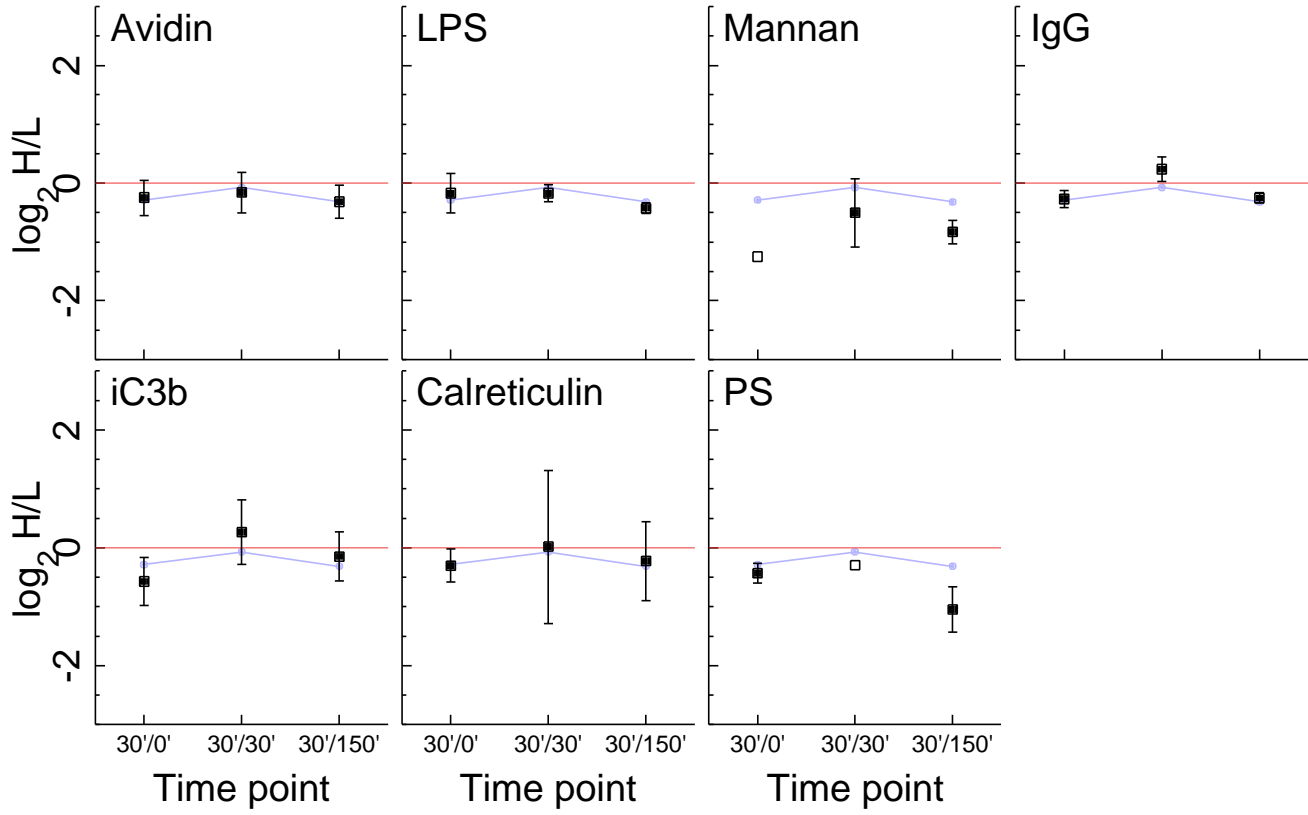

pdia3 (P27773)

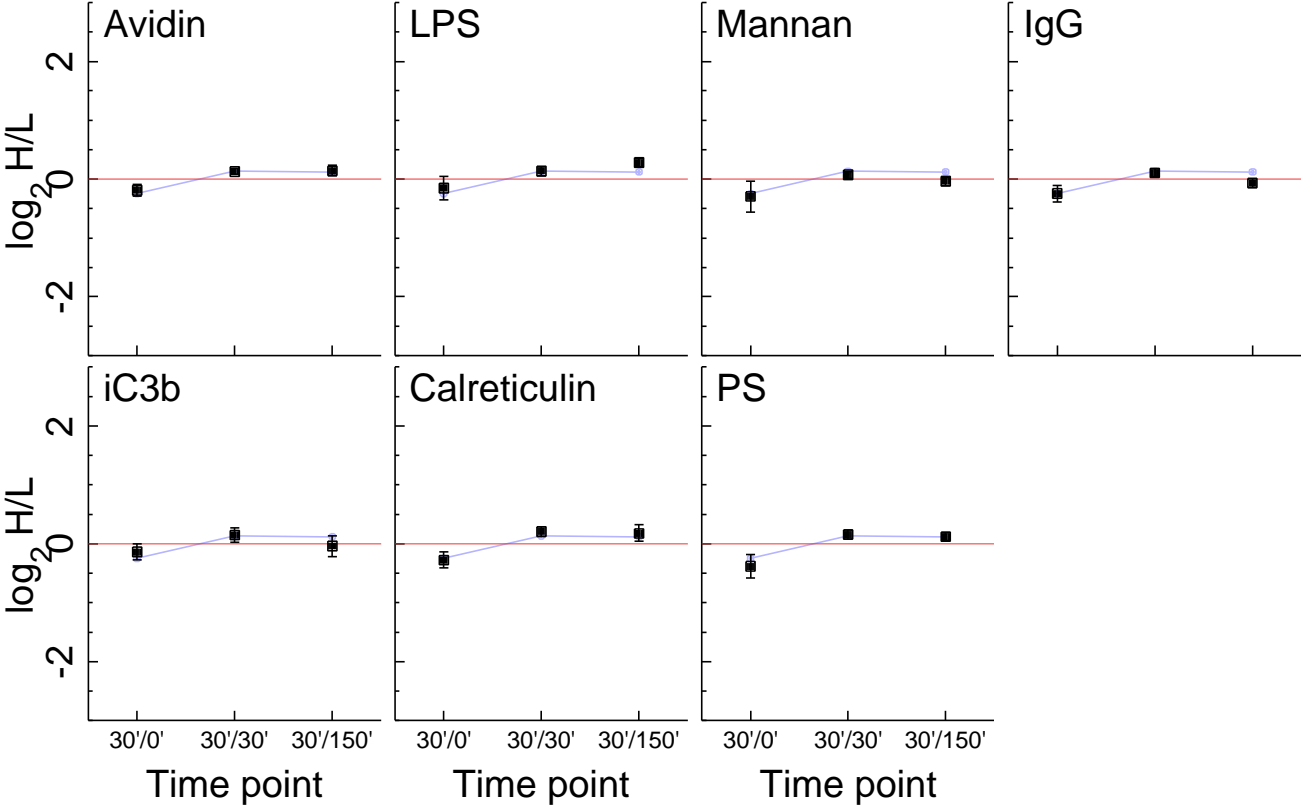

pdia4 (P08003)

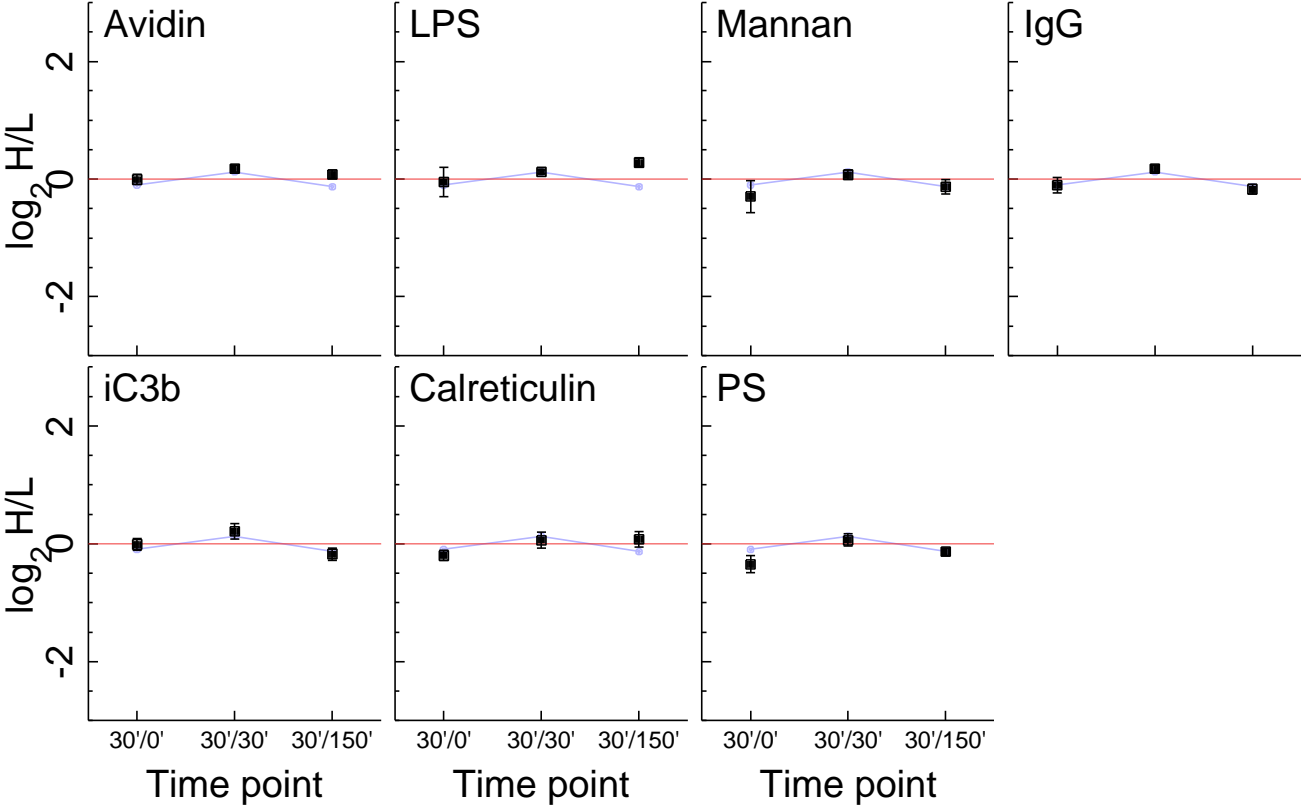

pdia6 (Q3TML0)

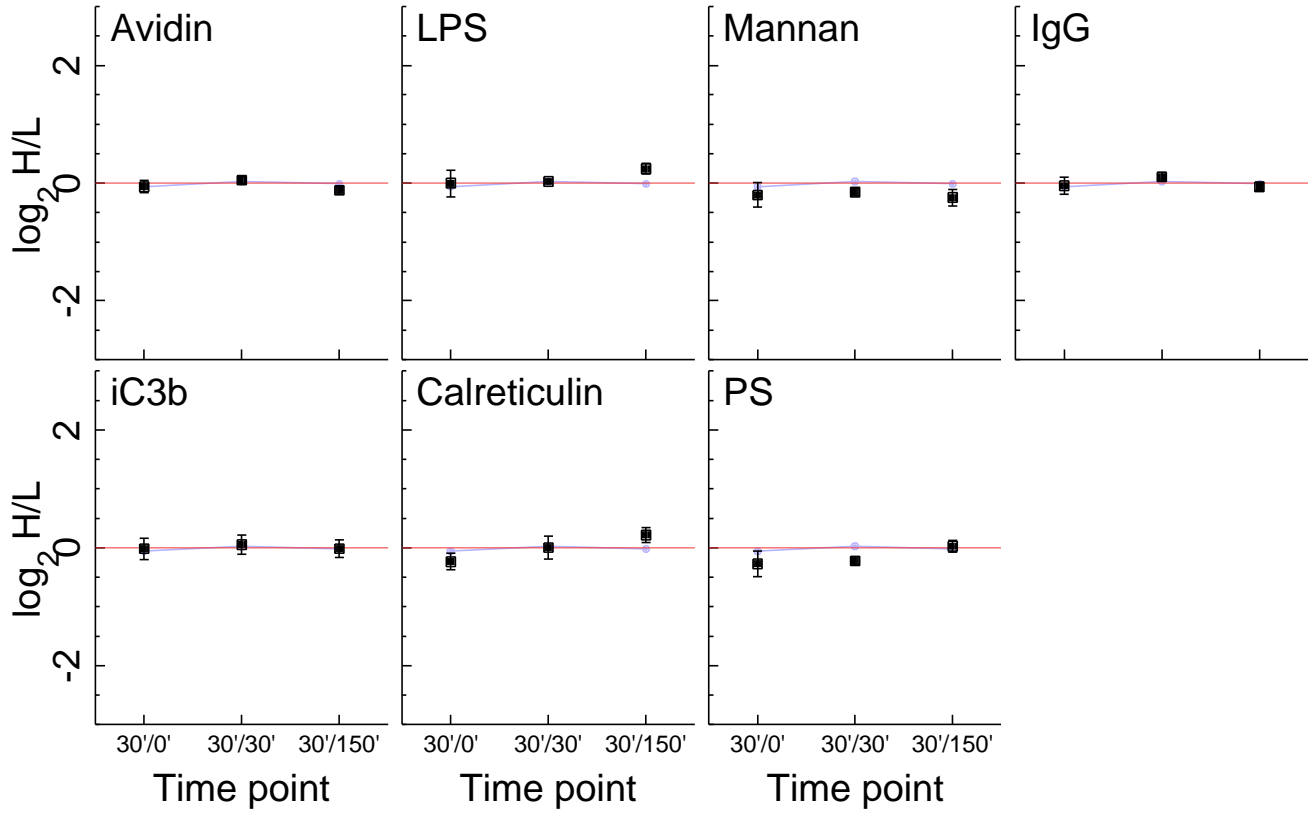



### pdlim2 (Q8R1G6)

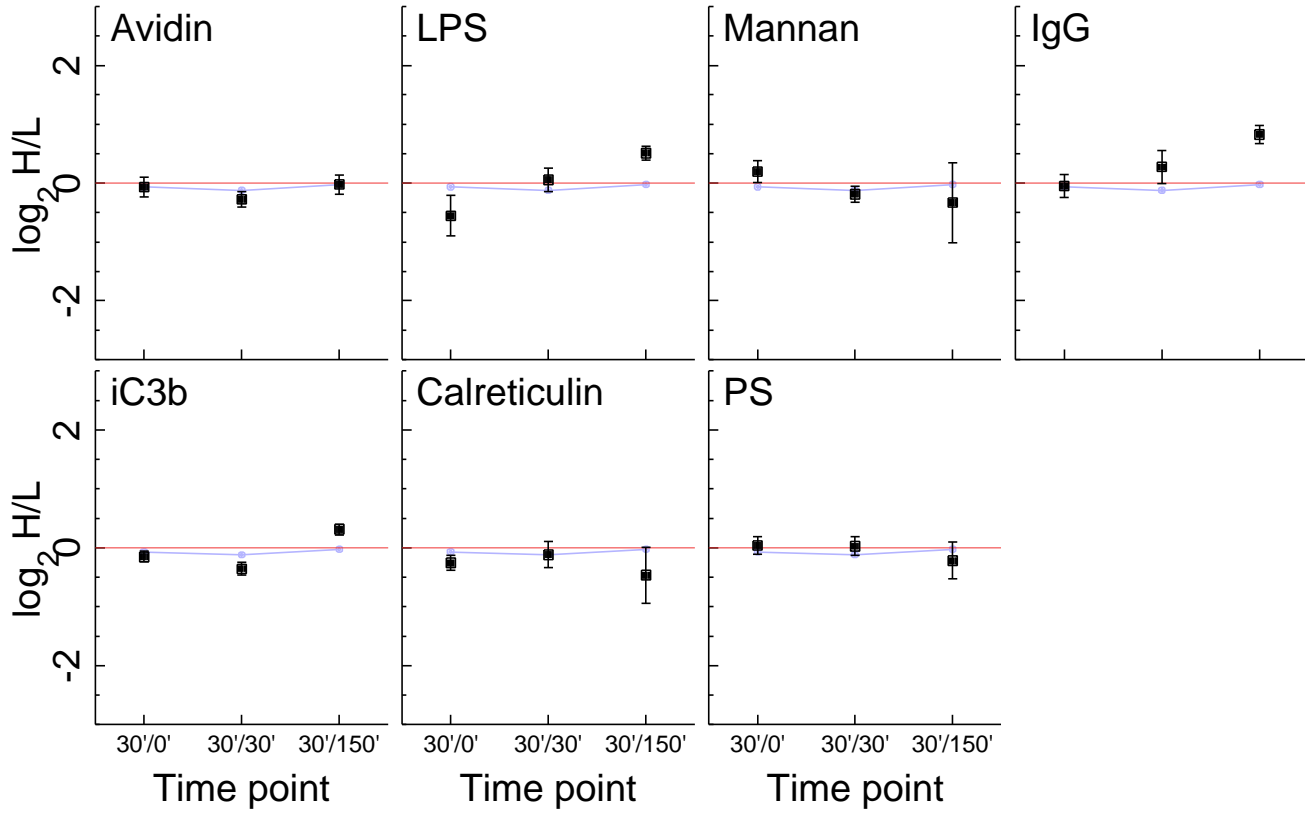

pdlim5 (Q8CI51)

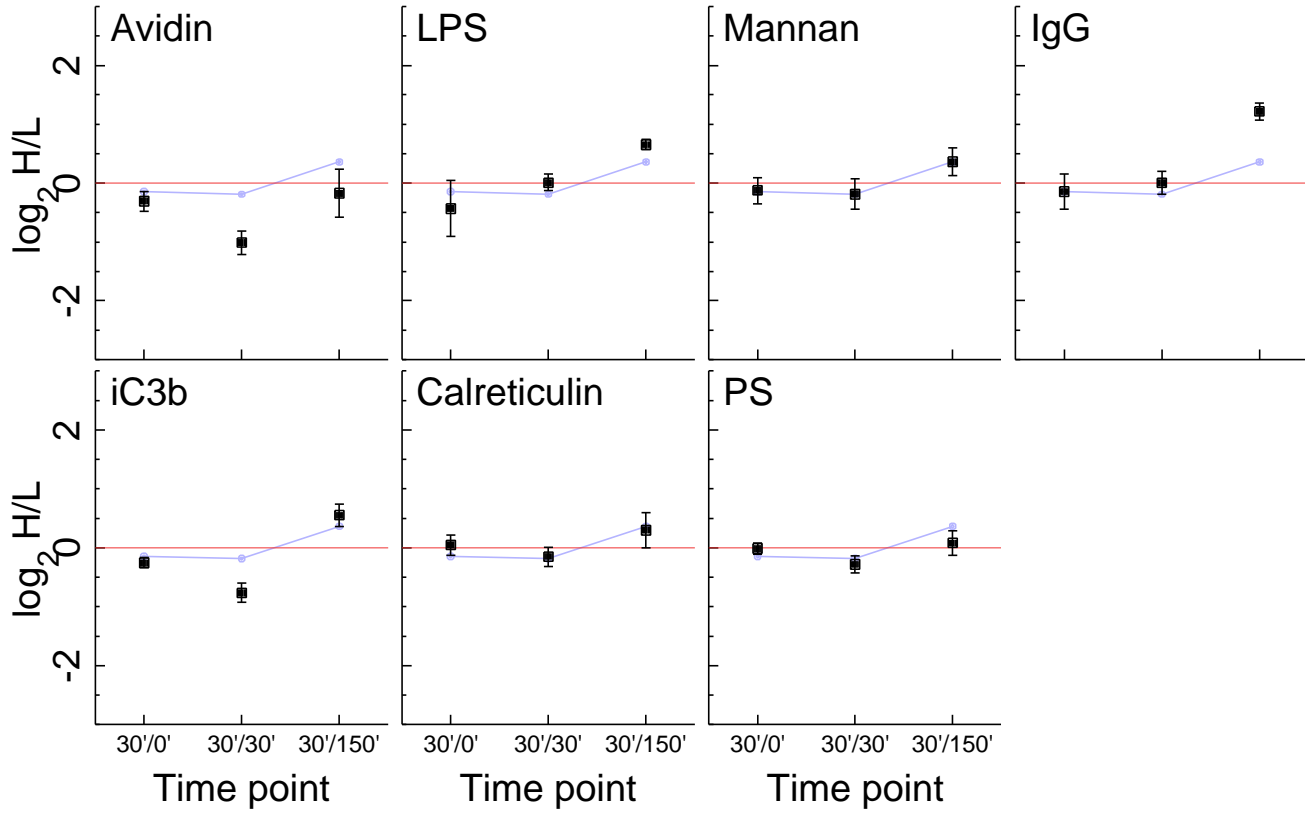

pdxk (Q8K183)

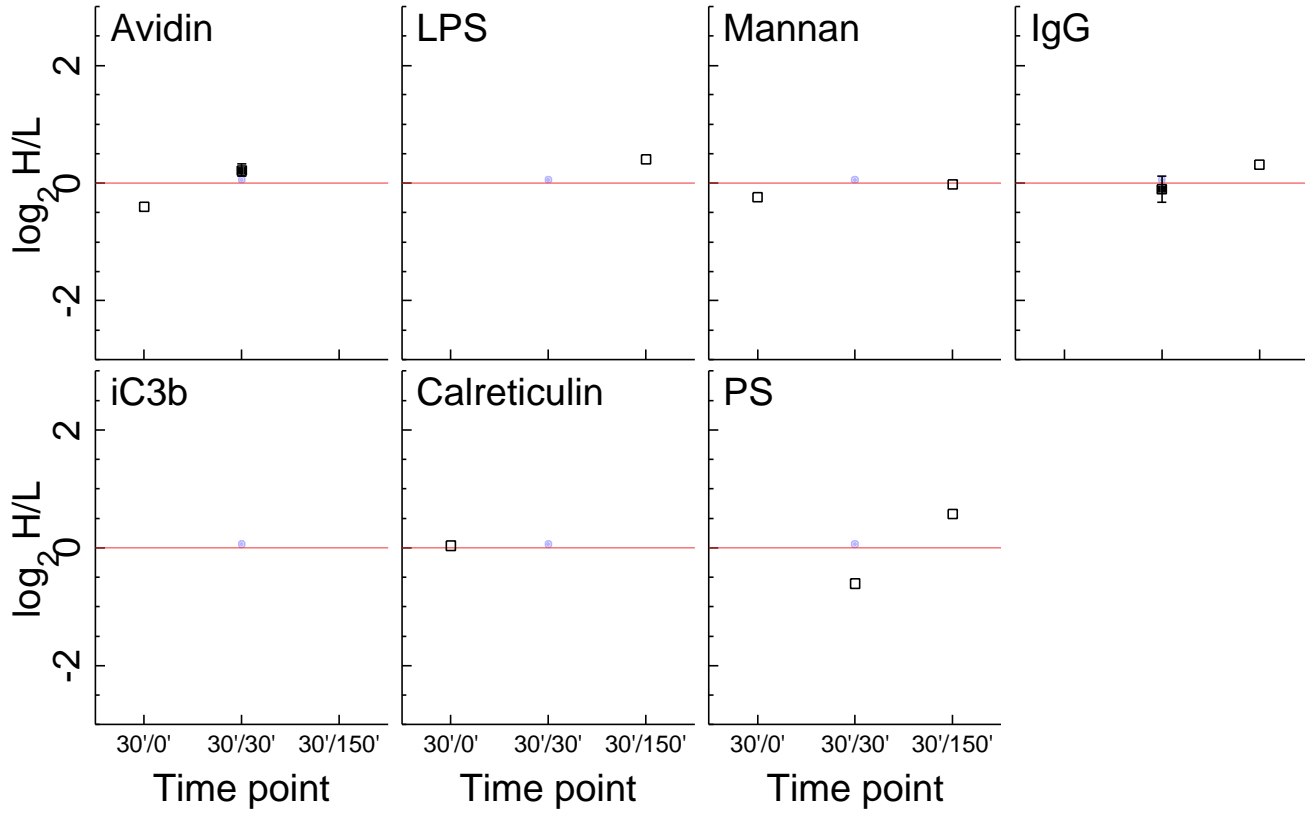

pea15 (Q62048)

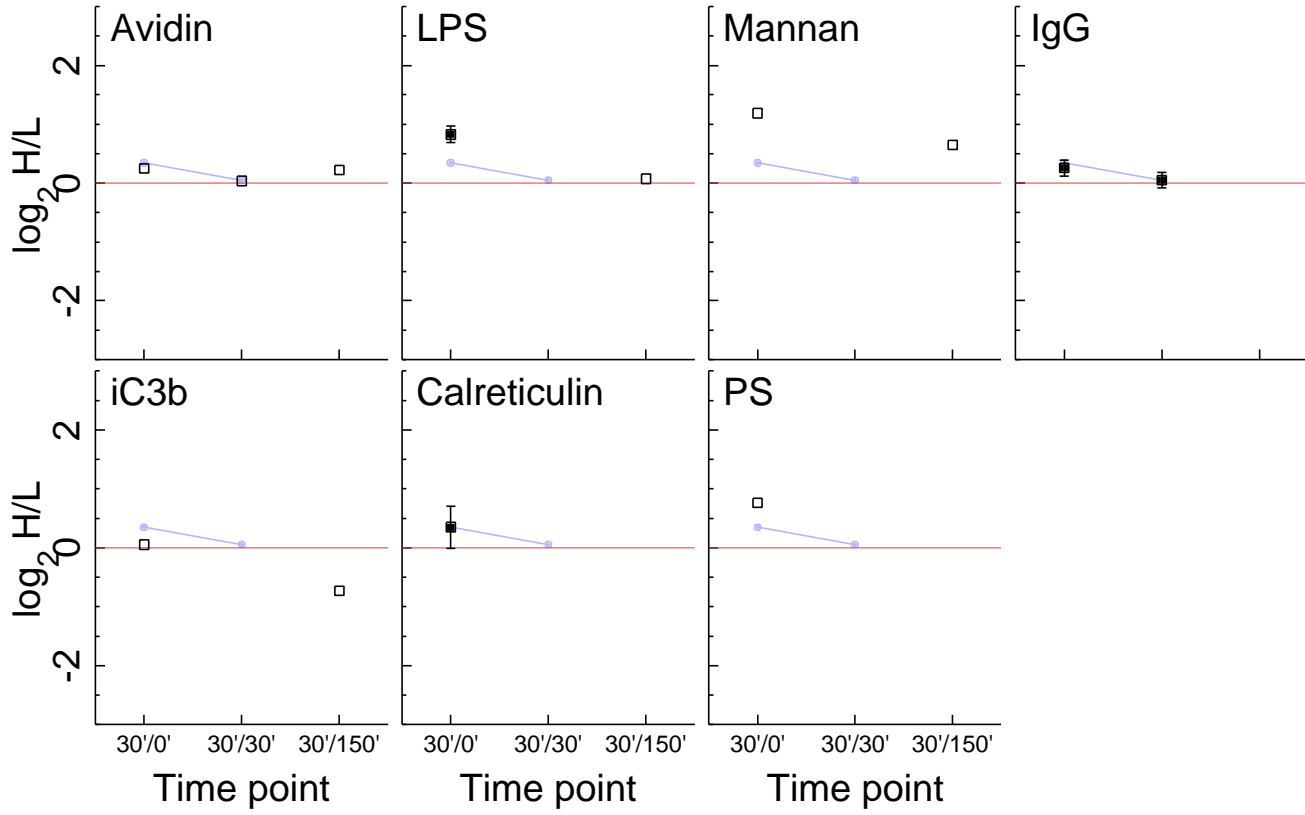

pef1 (Q8BFY6)

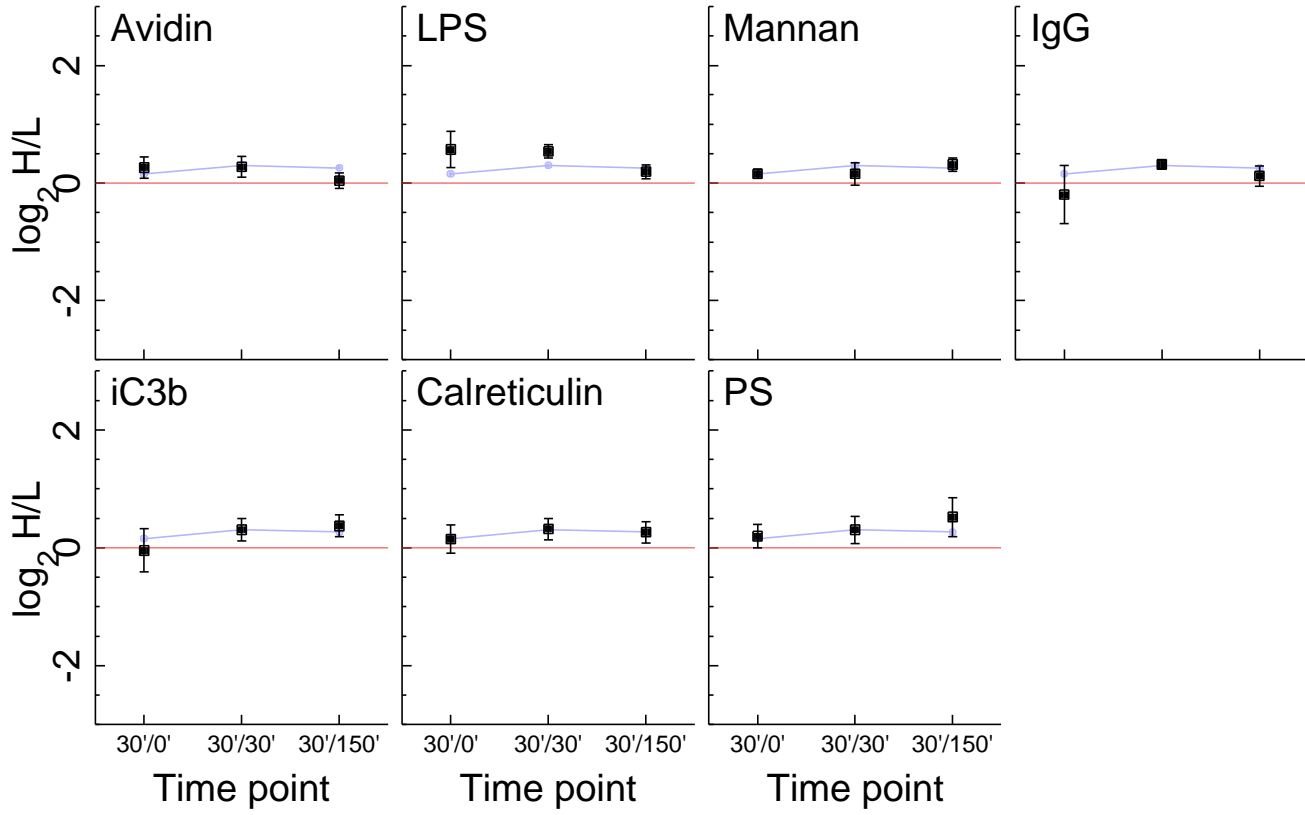

pepd (Q11136)

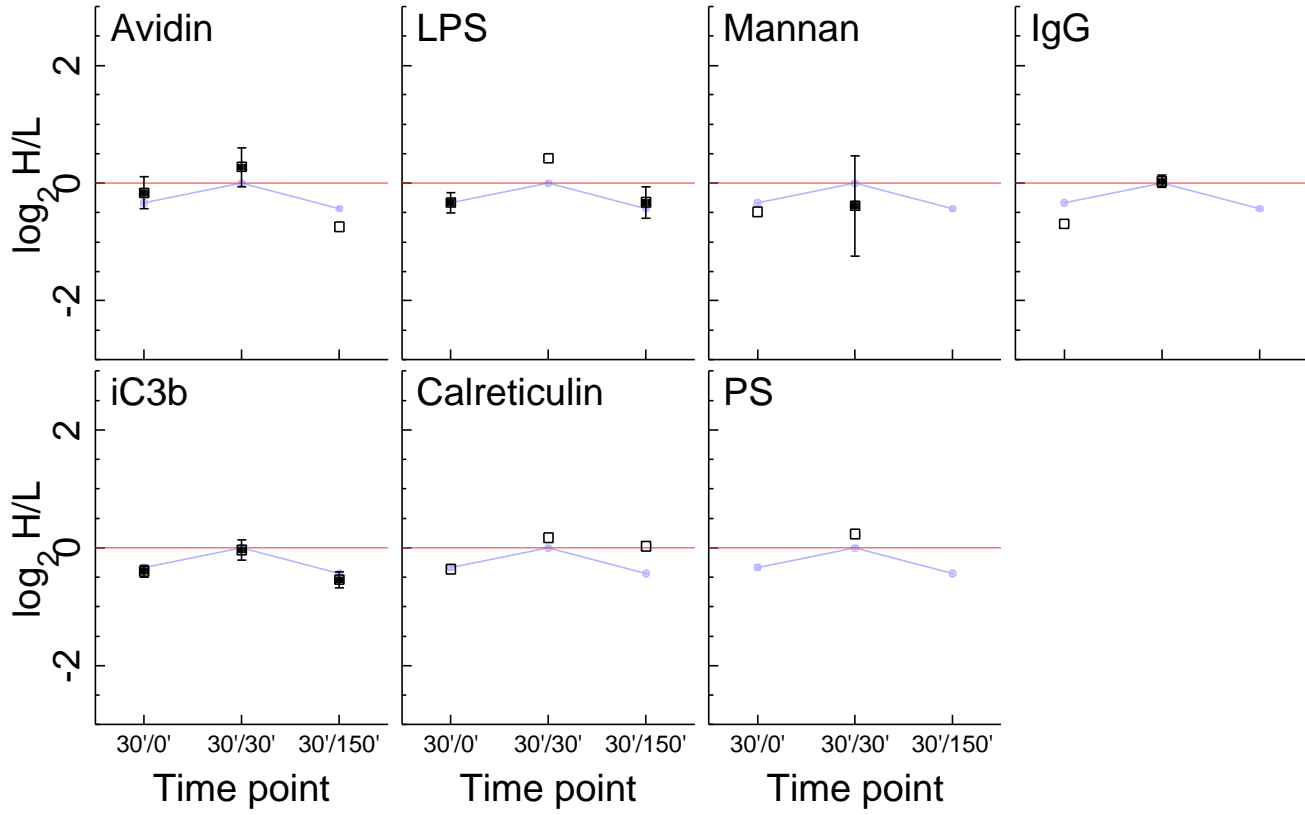

pex14 (Q9R0A0)

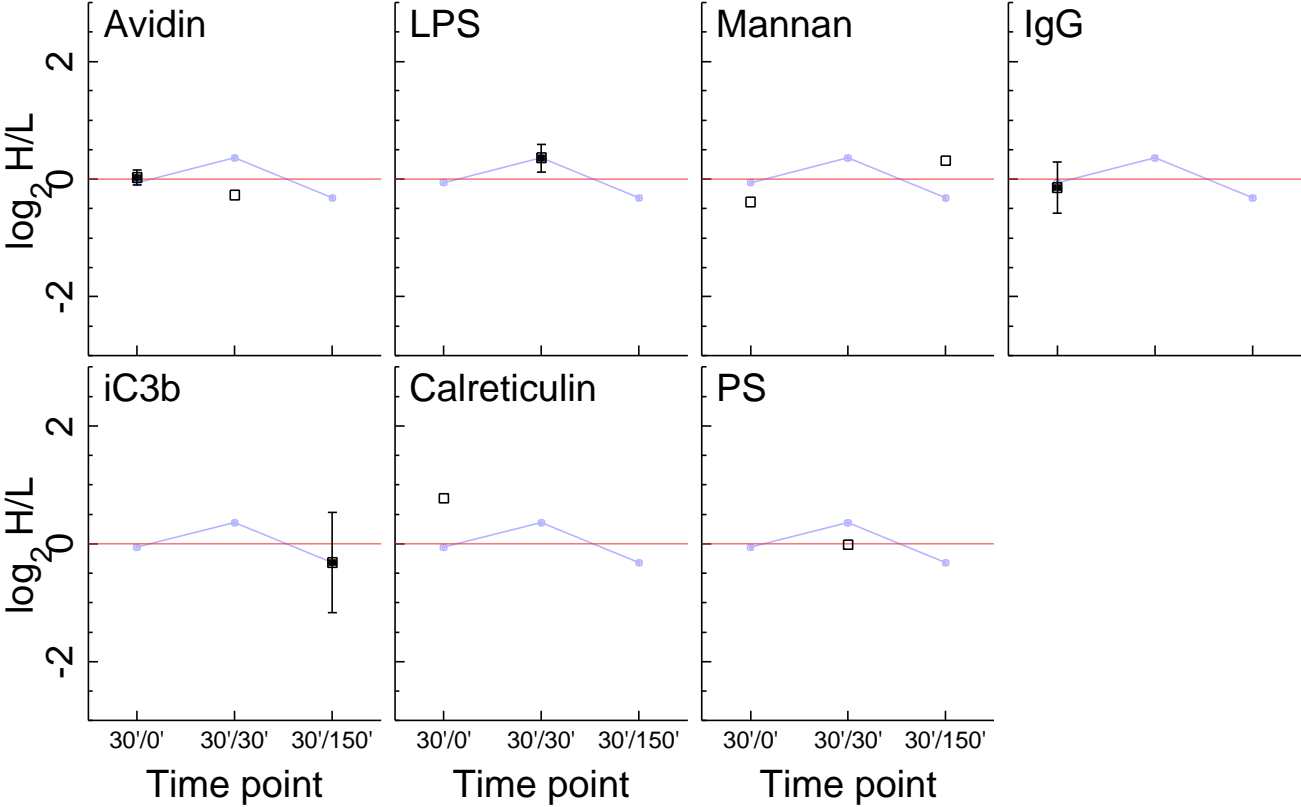

pf4 (Q9Z126)

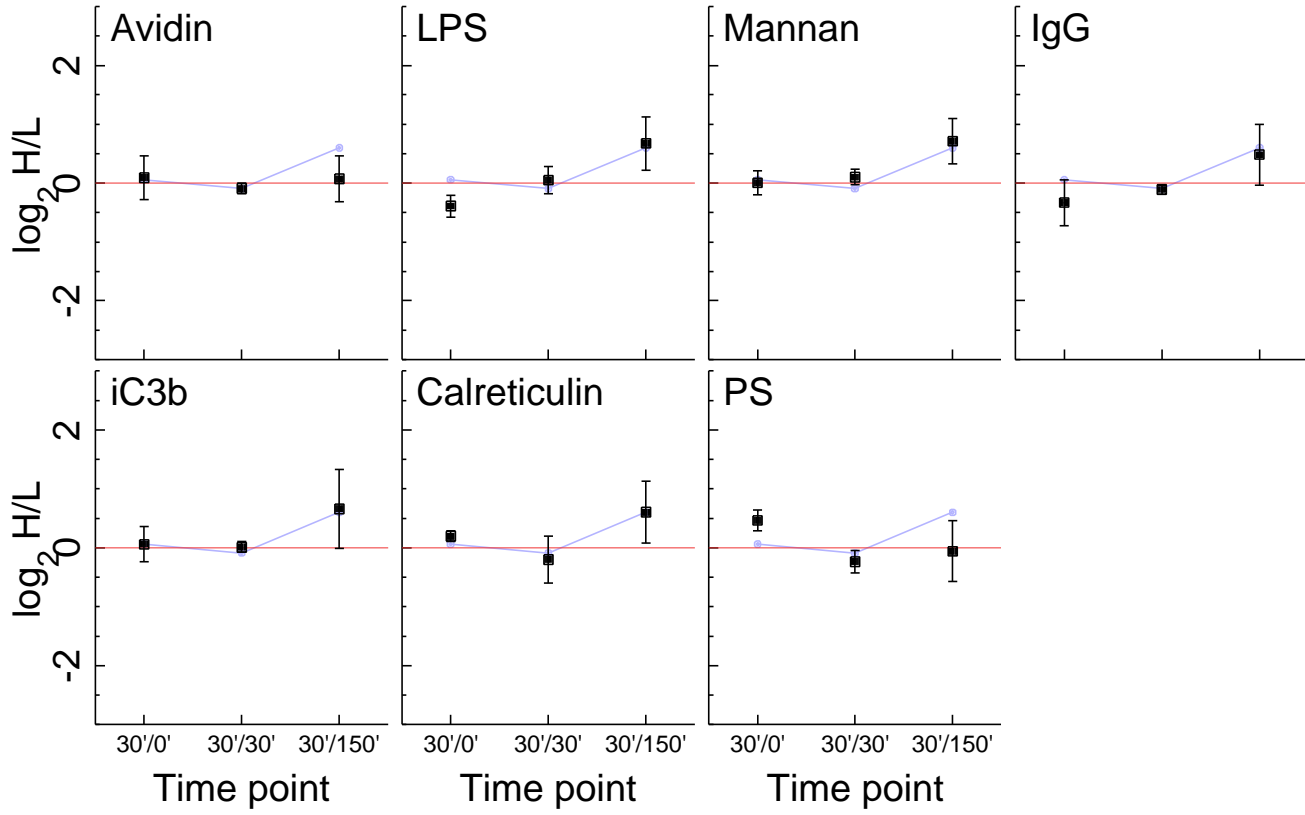



pfkp (Q8C605)

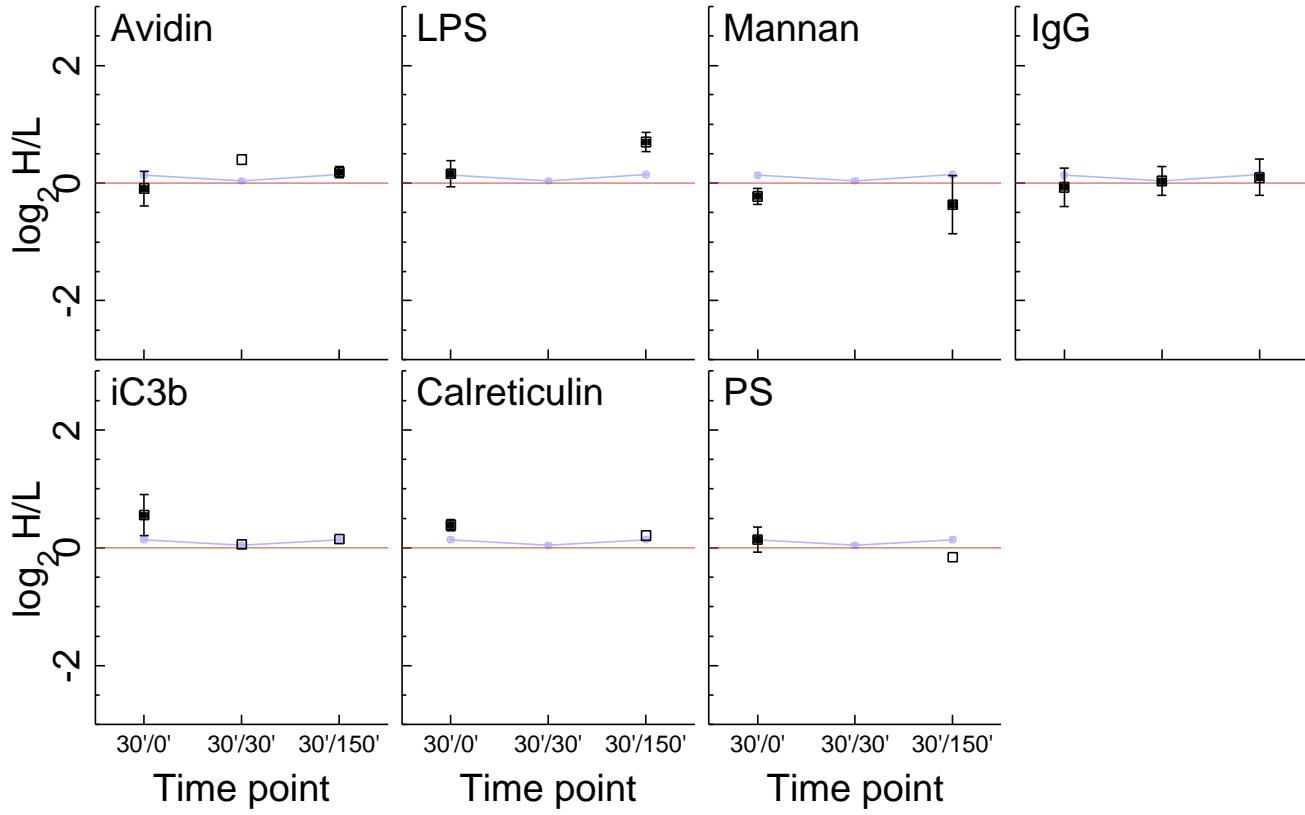

pfn1 (P62962)

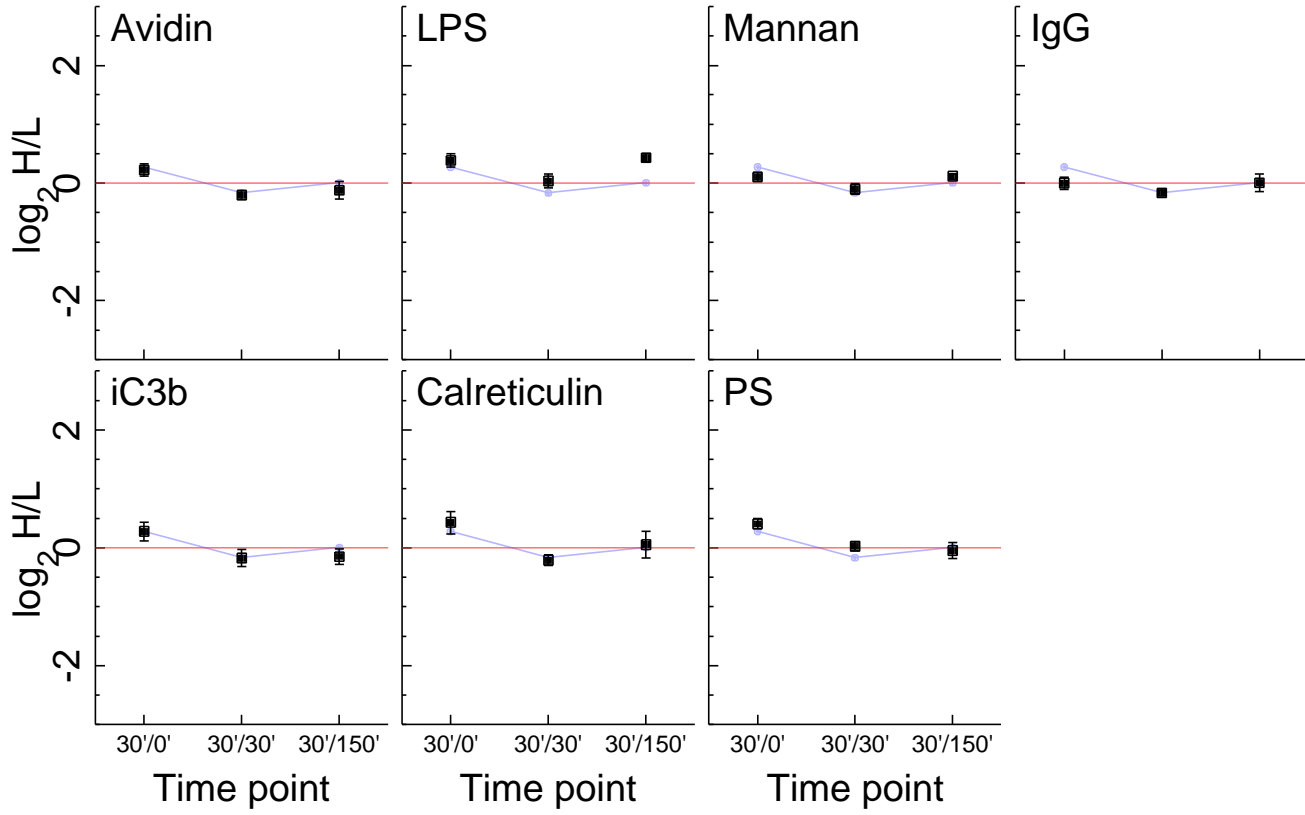

pgam1 (Q9DBJ1)

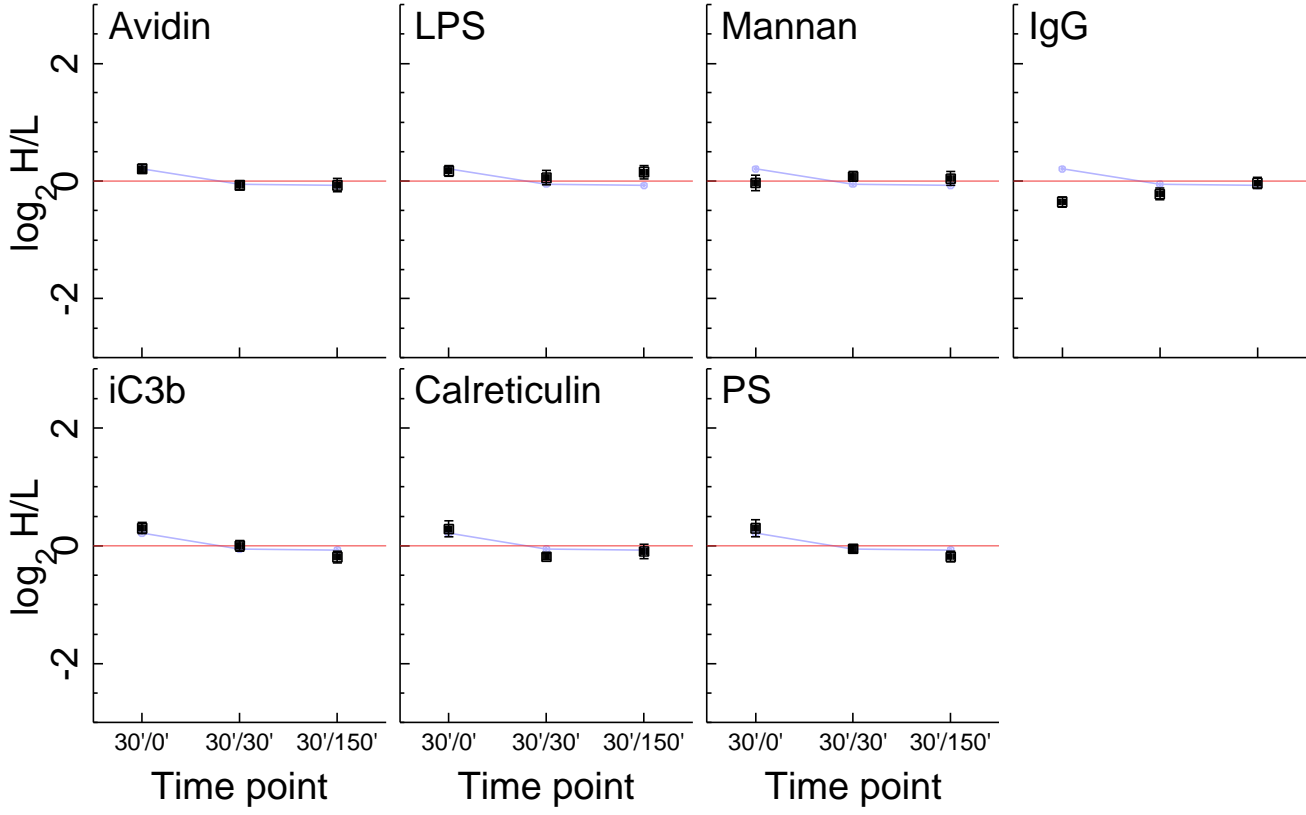

pgd (Q9DCD0)

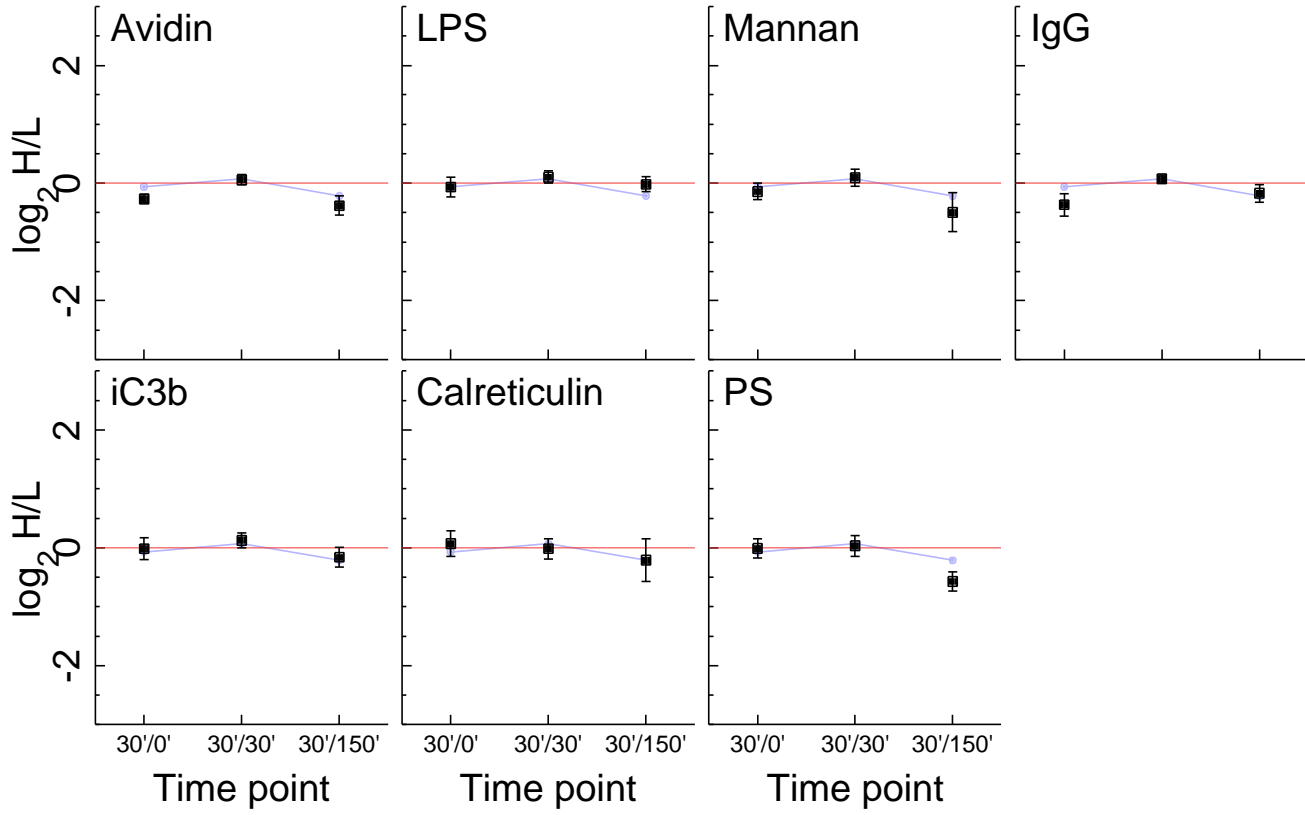

pgk1 (P09411)

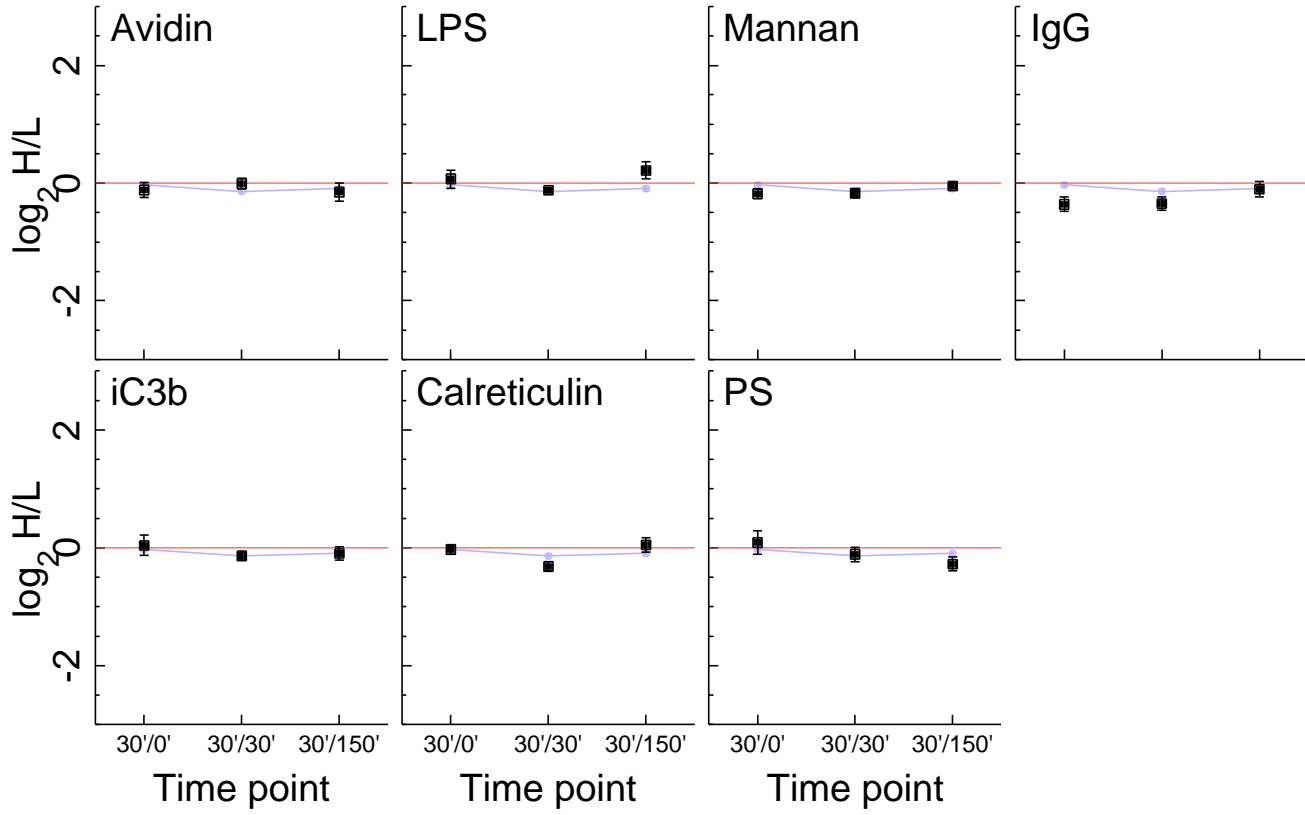

# pgrmc1 (O55022)

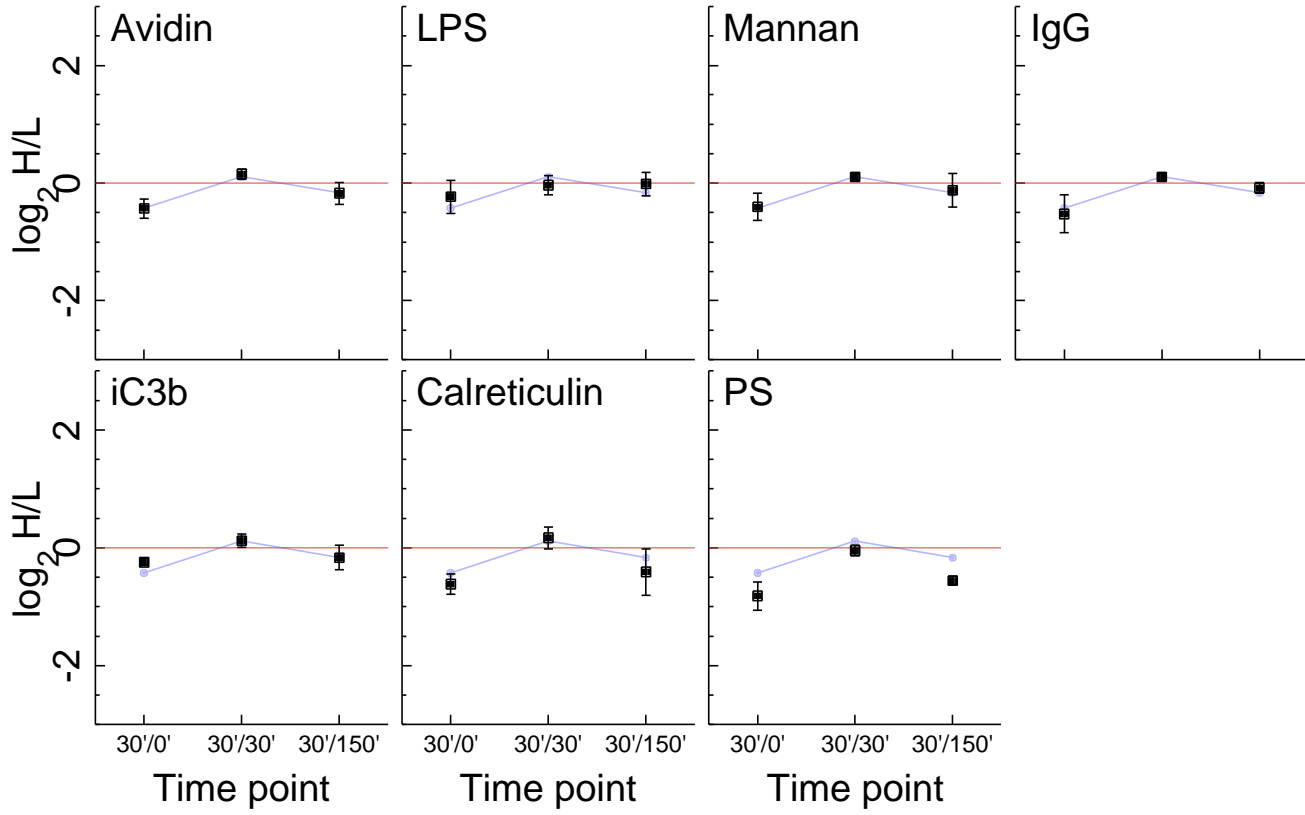

pgrmc2 (Q80UU9)

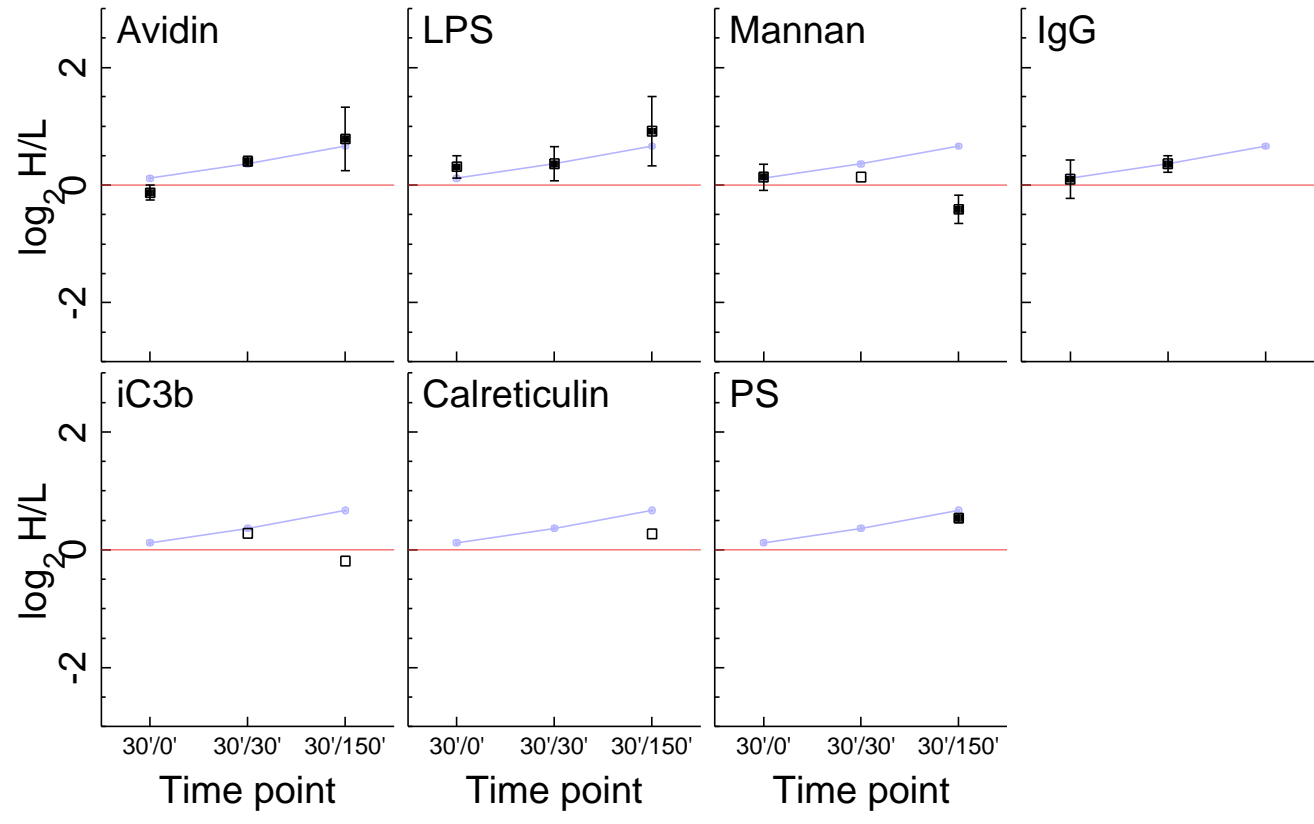

phb2 (O35129)

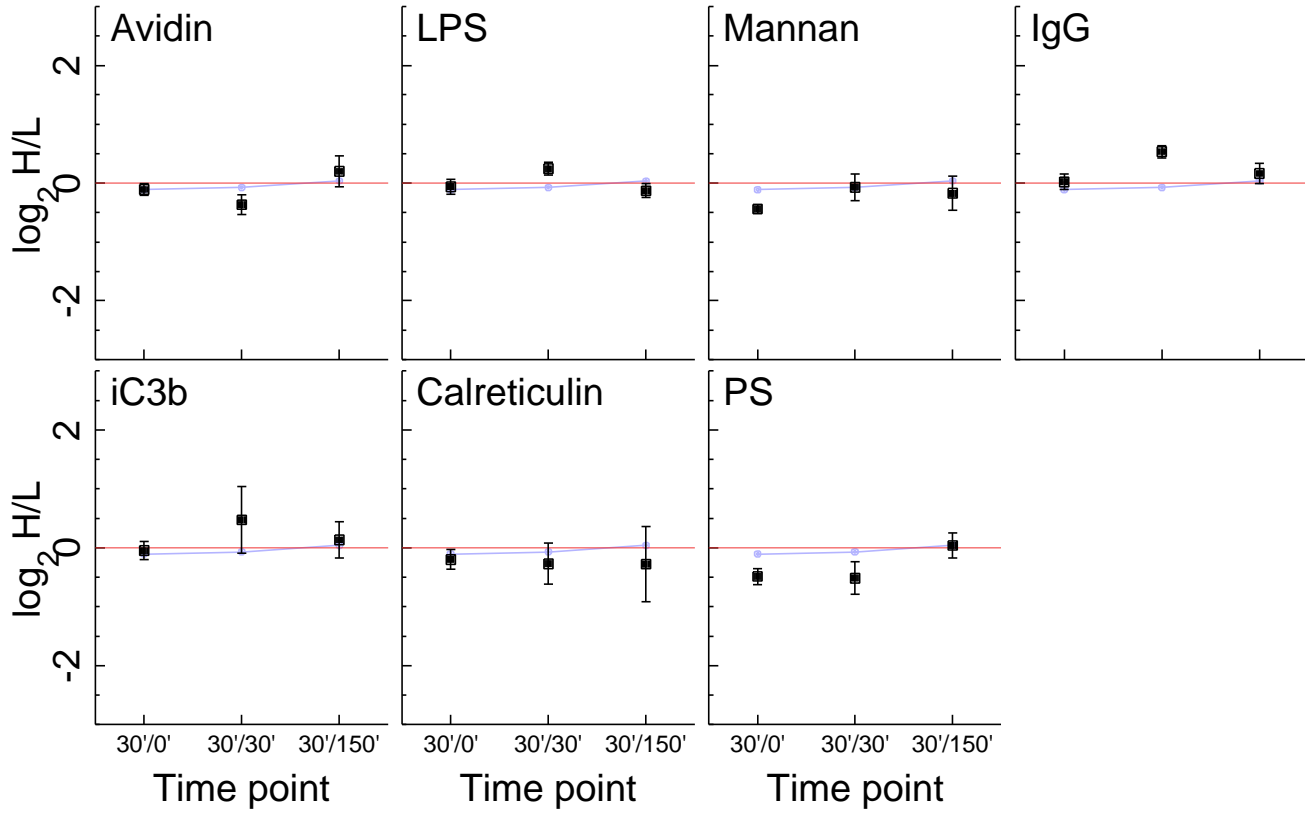



phb (P67778)

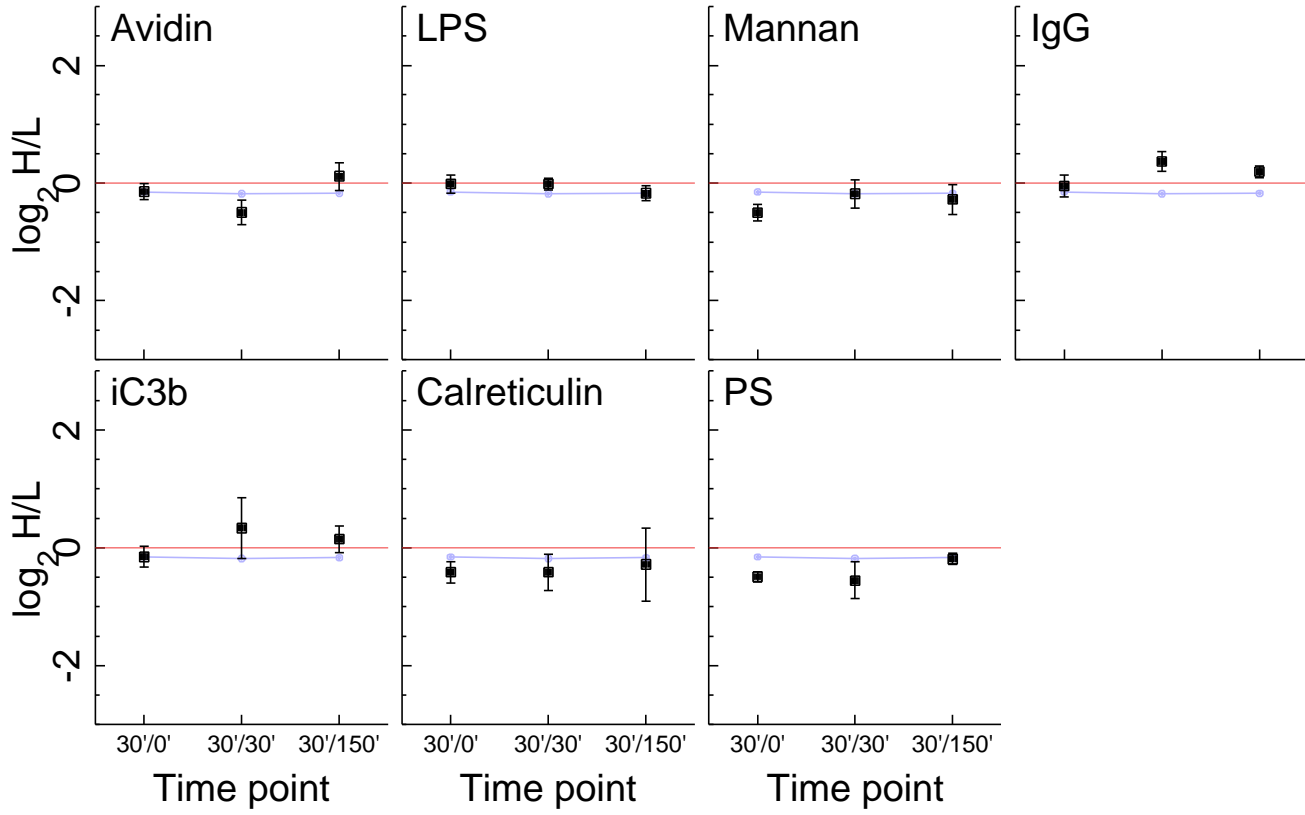

### pi4k2a (Q2TBE6)

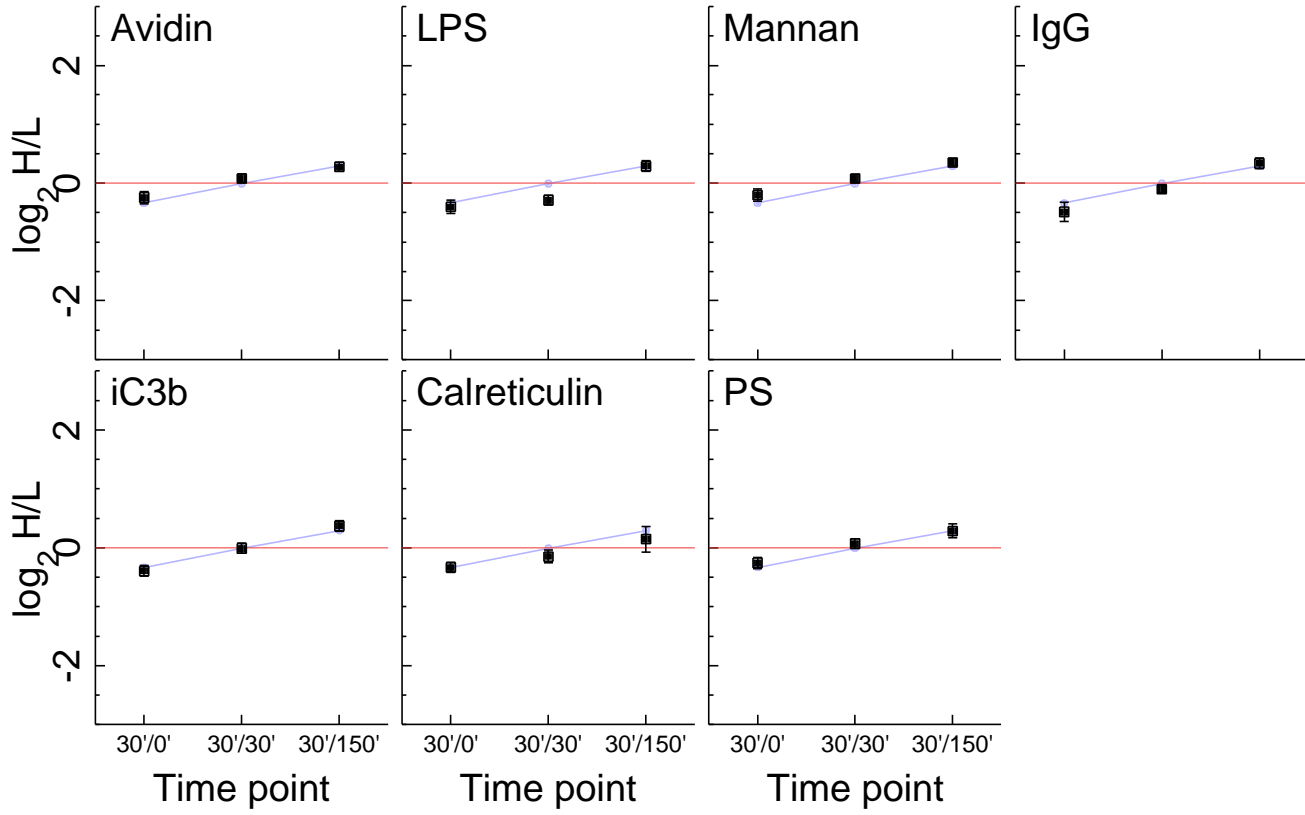

pi4ka (E9Q3L2)

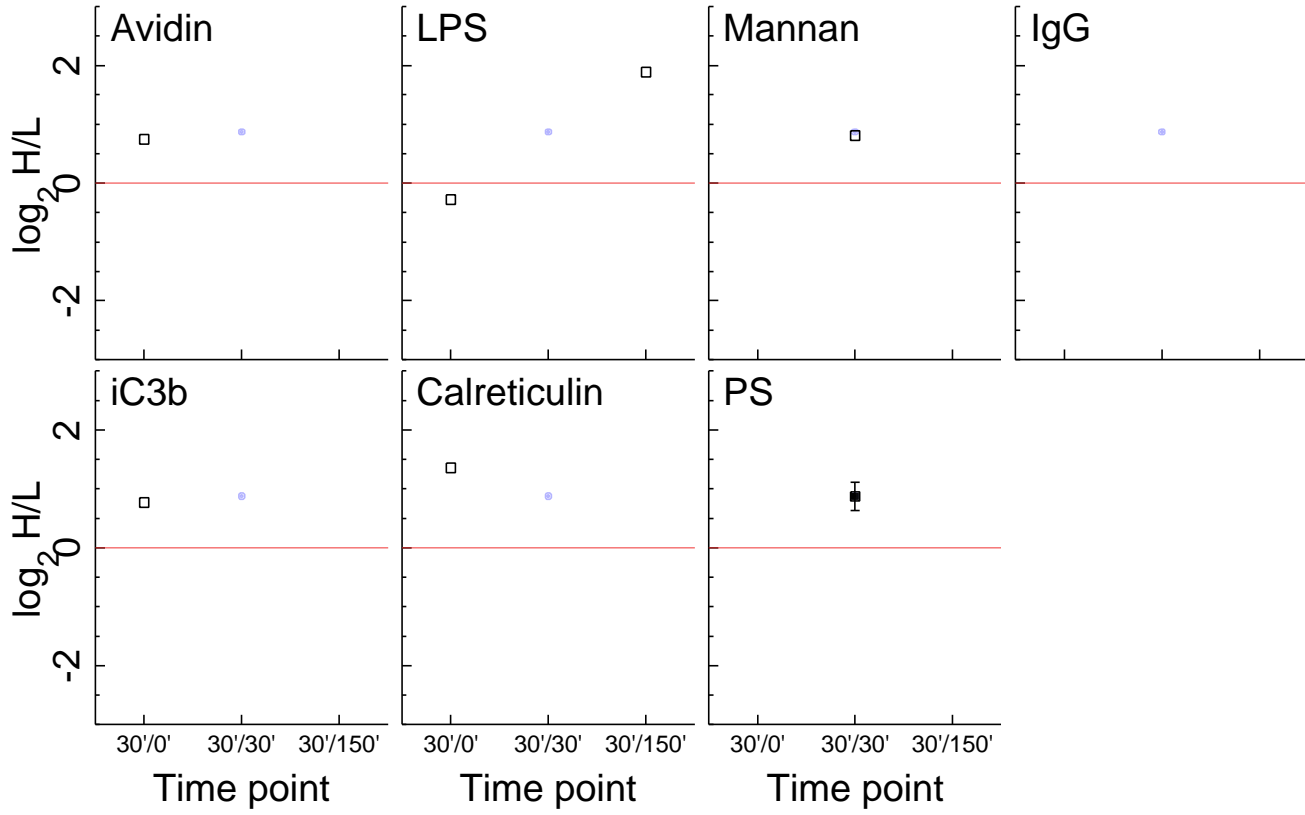

pid1 (Q3UBG2)

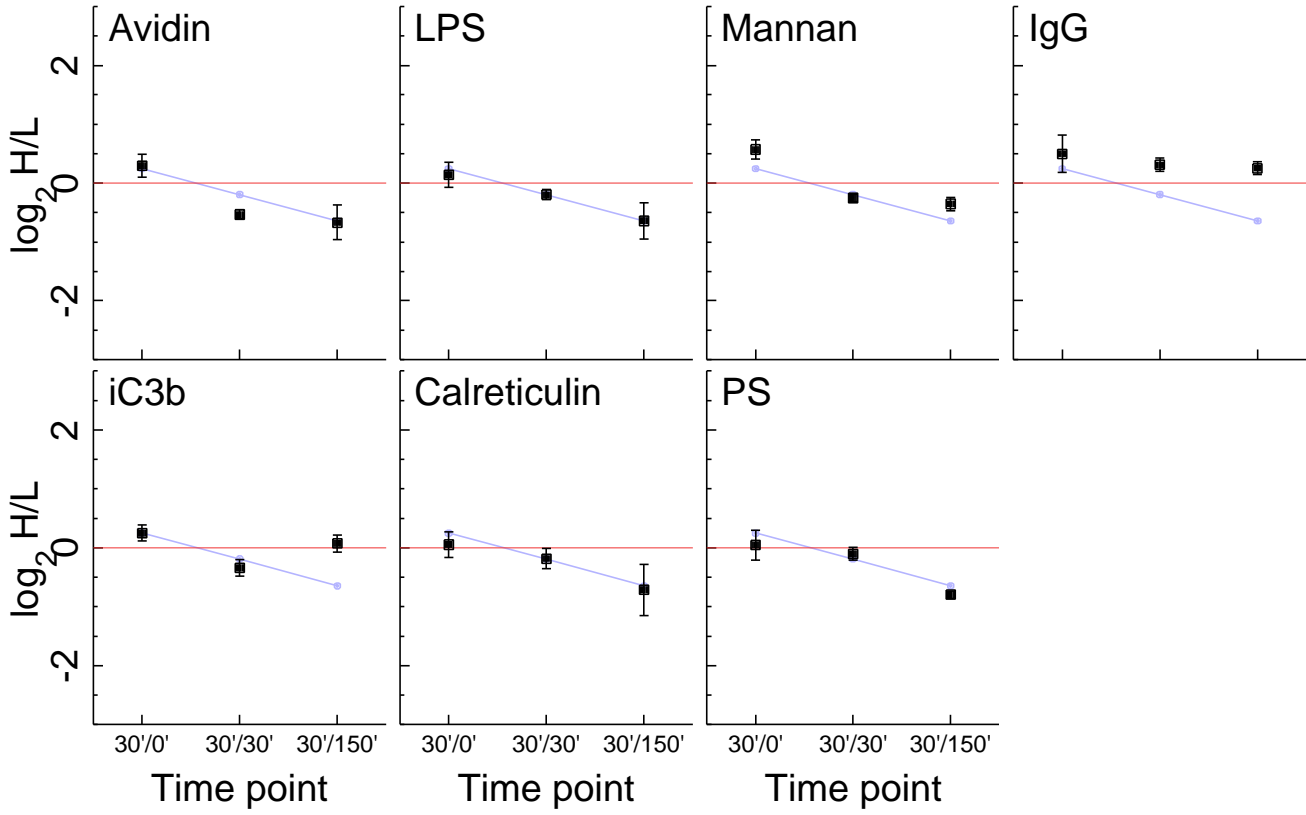

pigs (Q6PD26)

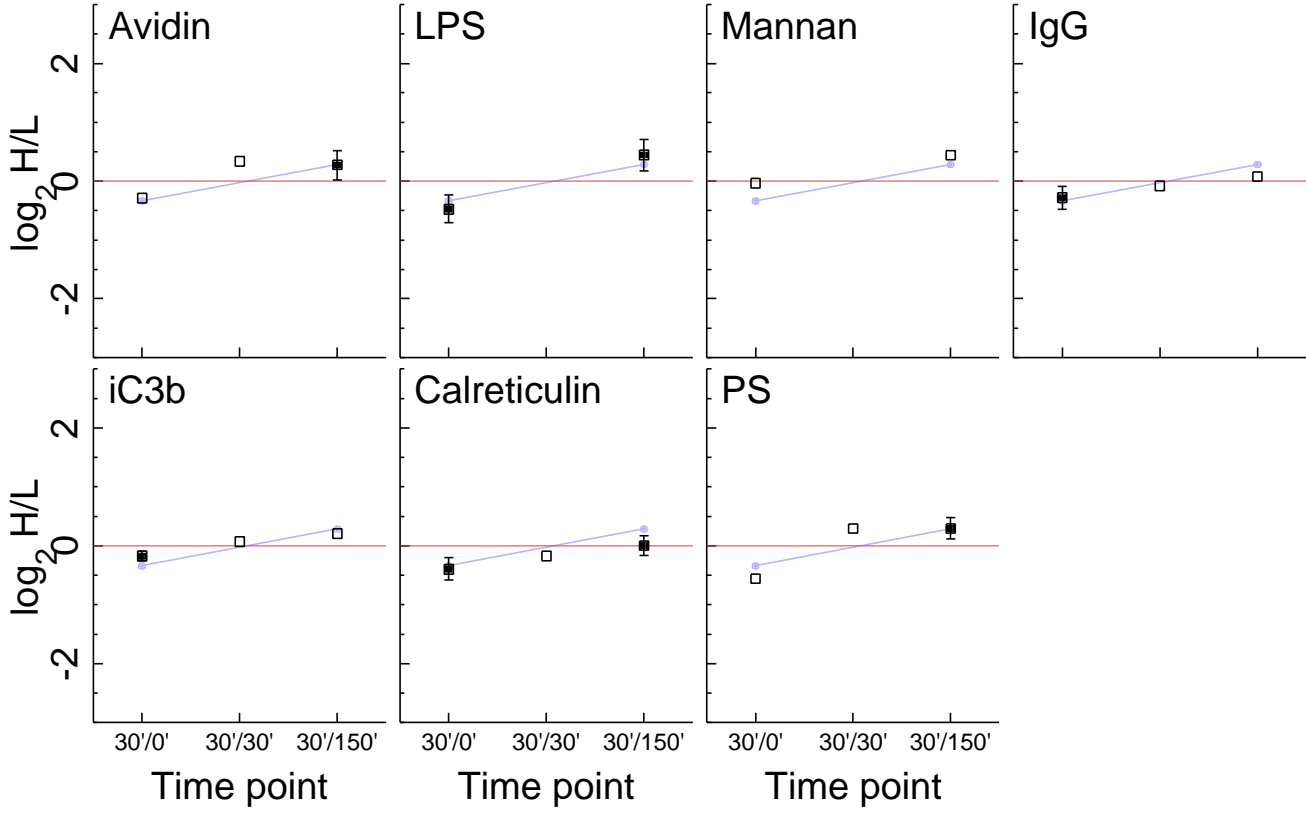

pigt (Q8BXQ2)

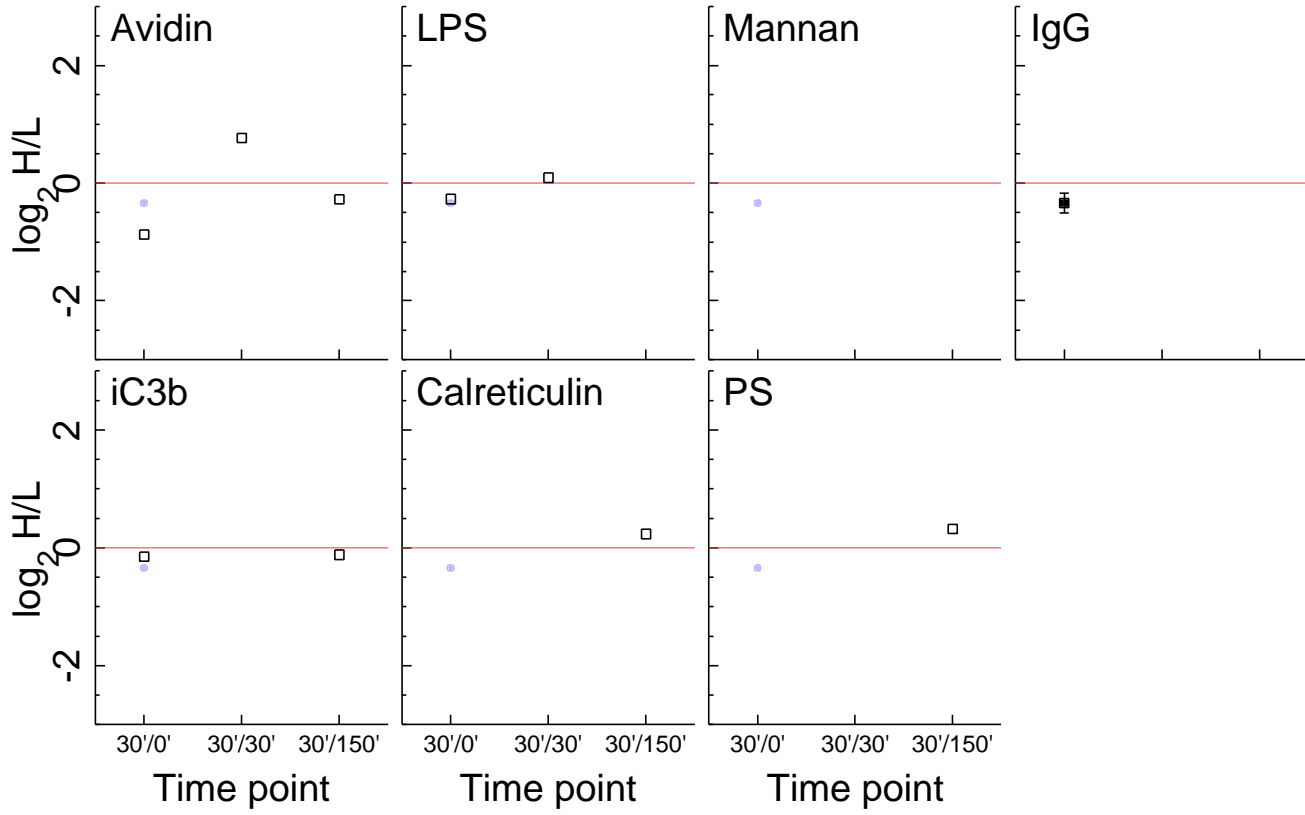

pik3ap1 (Q9EQ32)

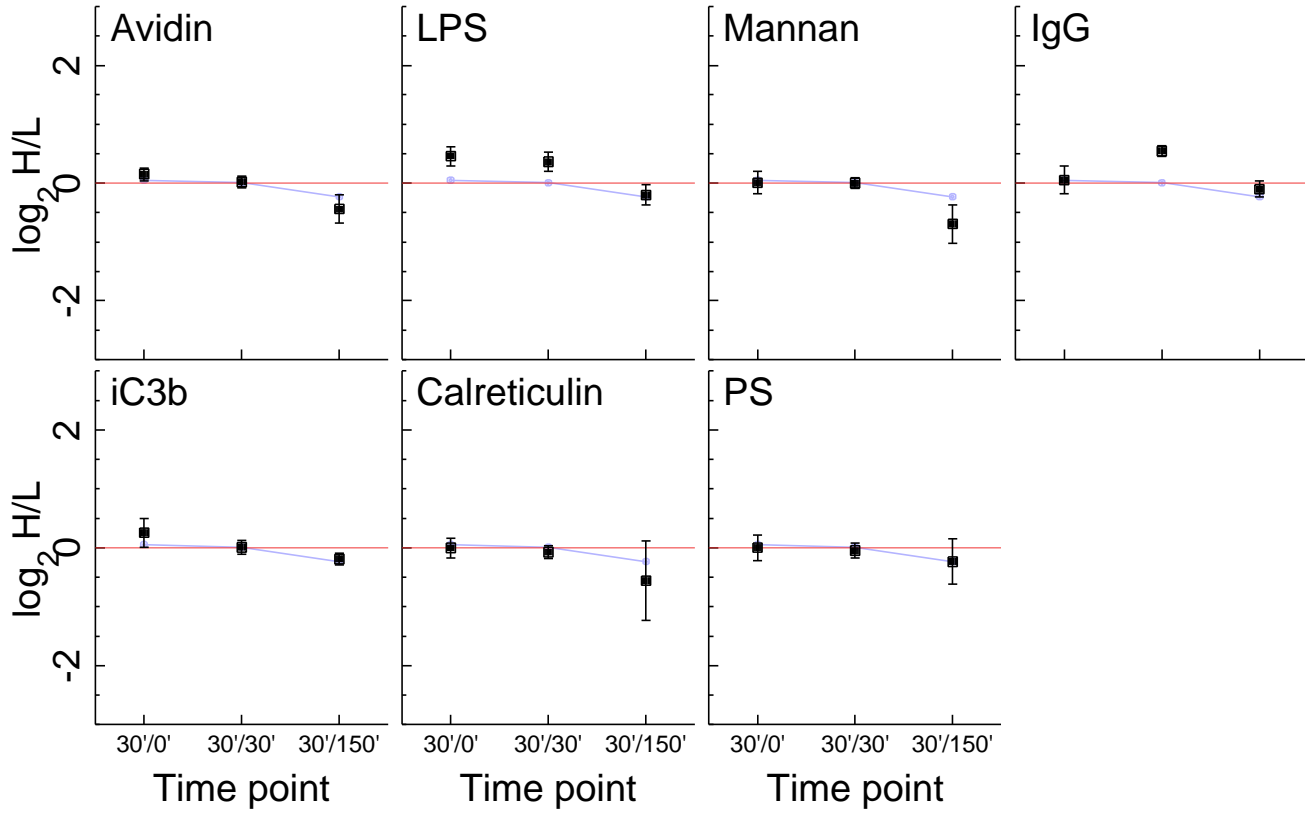

pik3c3 (Q6PF93)

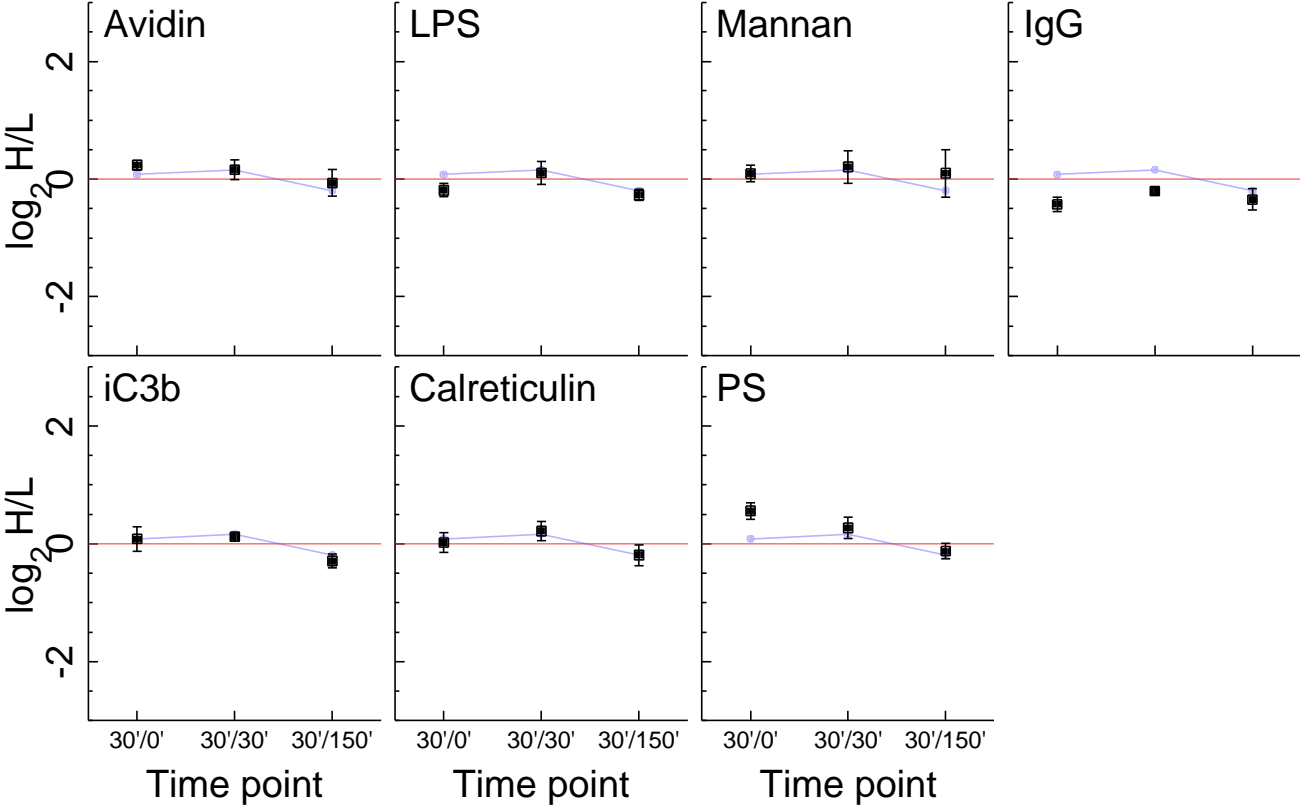



### pik3cg (Q9JHG7)

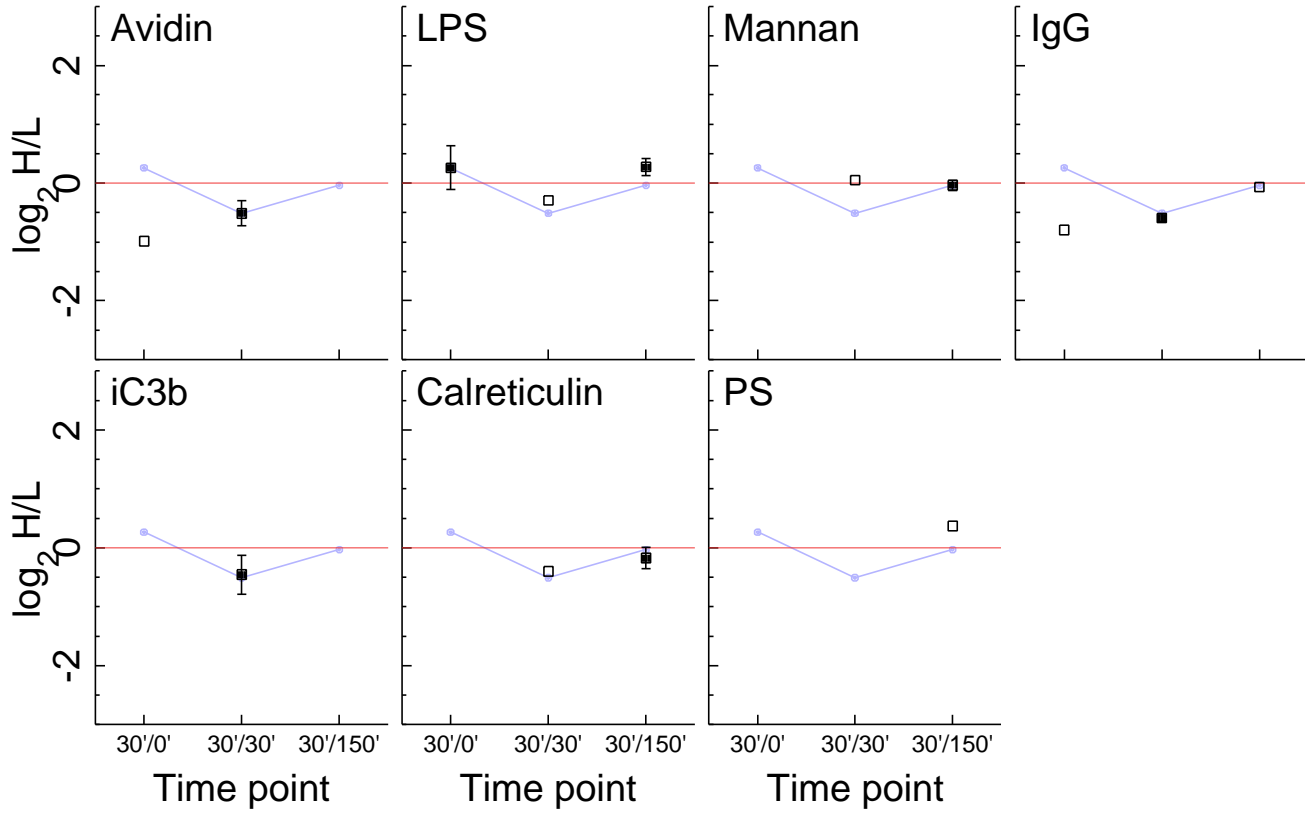

pik3r4 (Q8VD65)

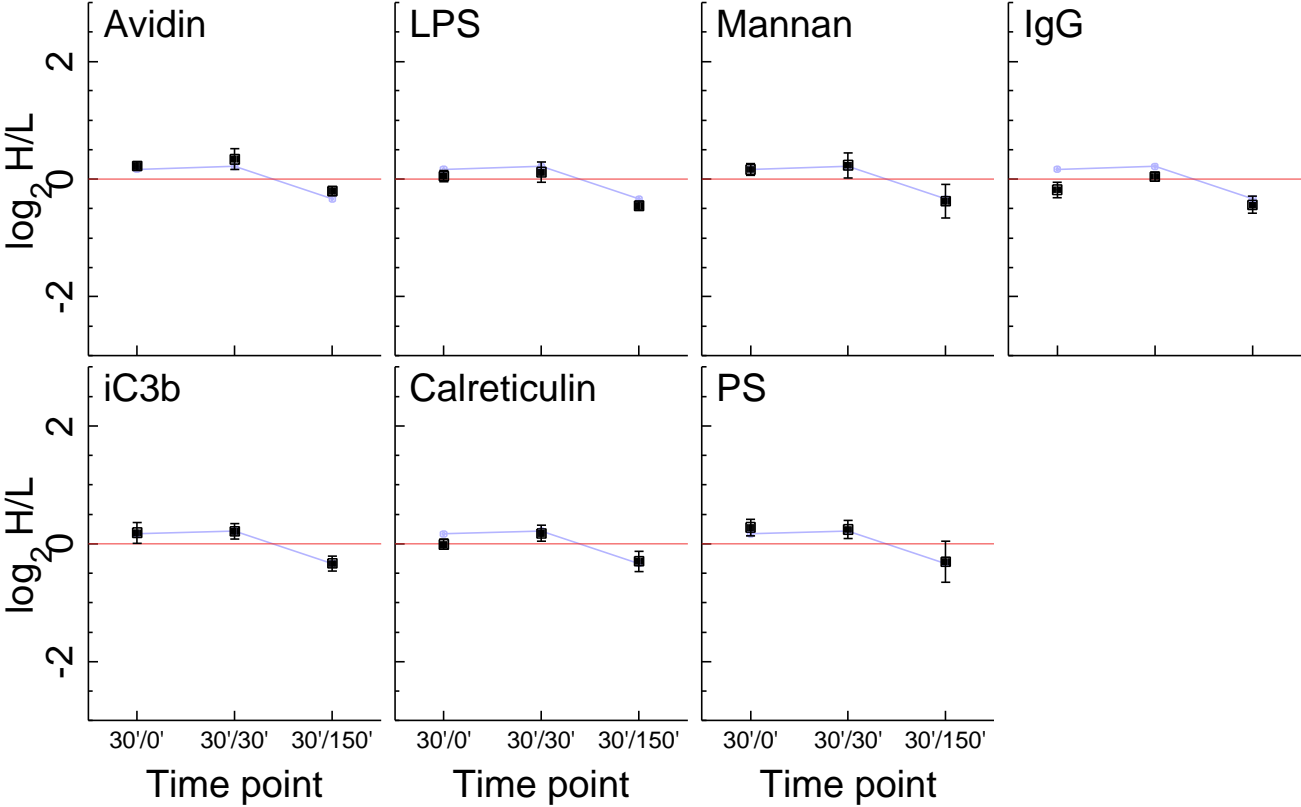

pion (Q3TCV3)

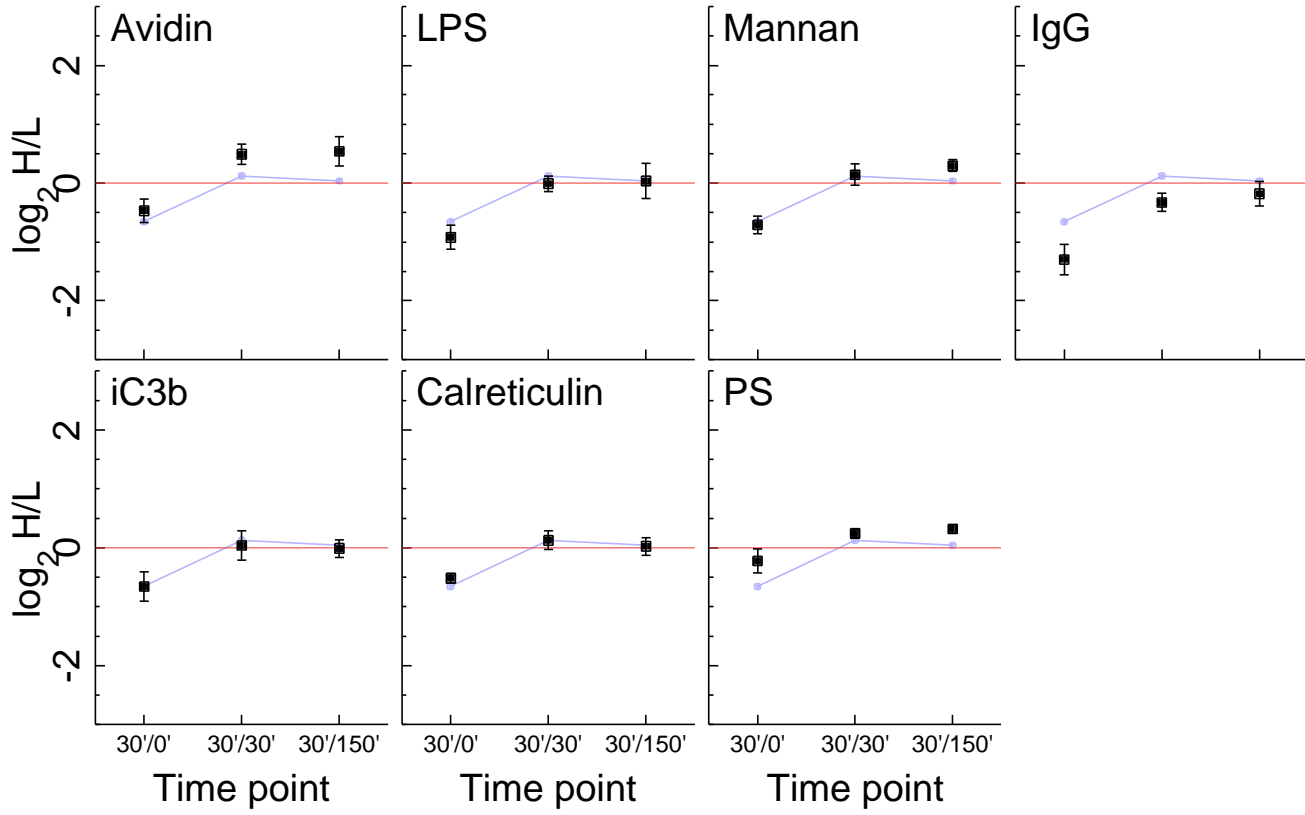

### pip4k2a (O70172)

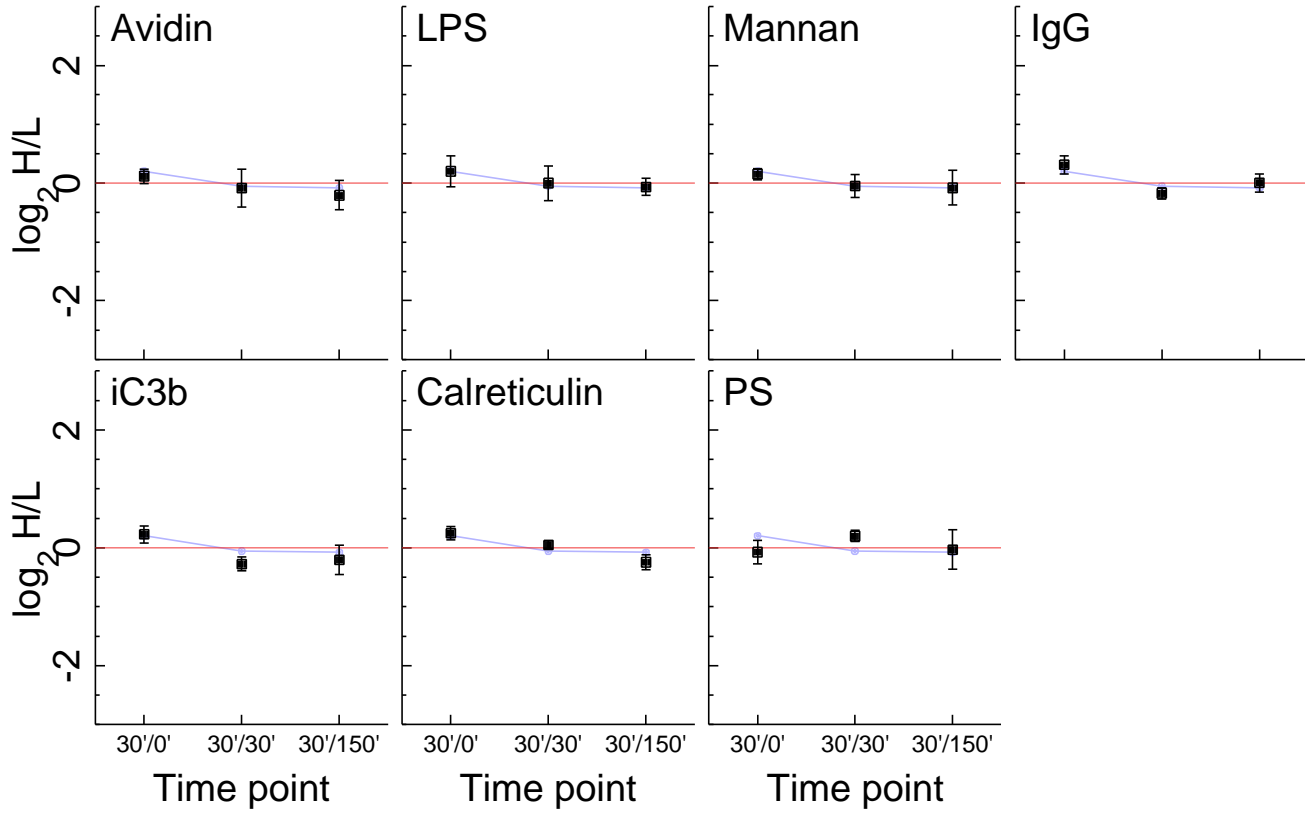

### pip4k2b (Q80XI4)

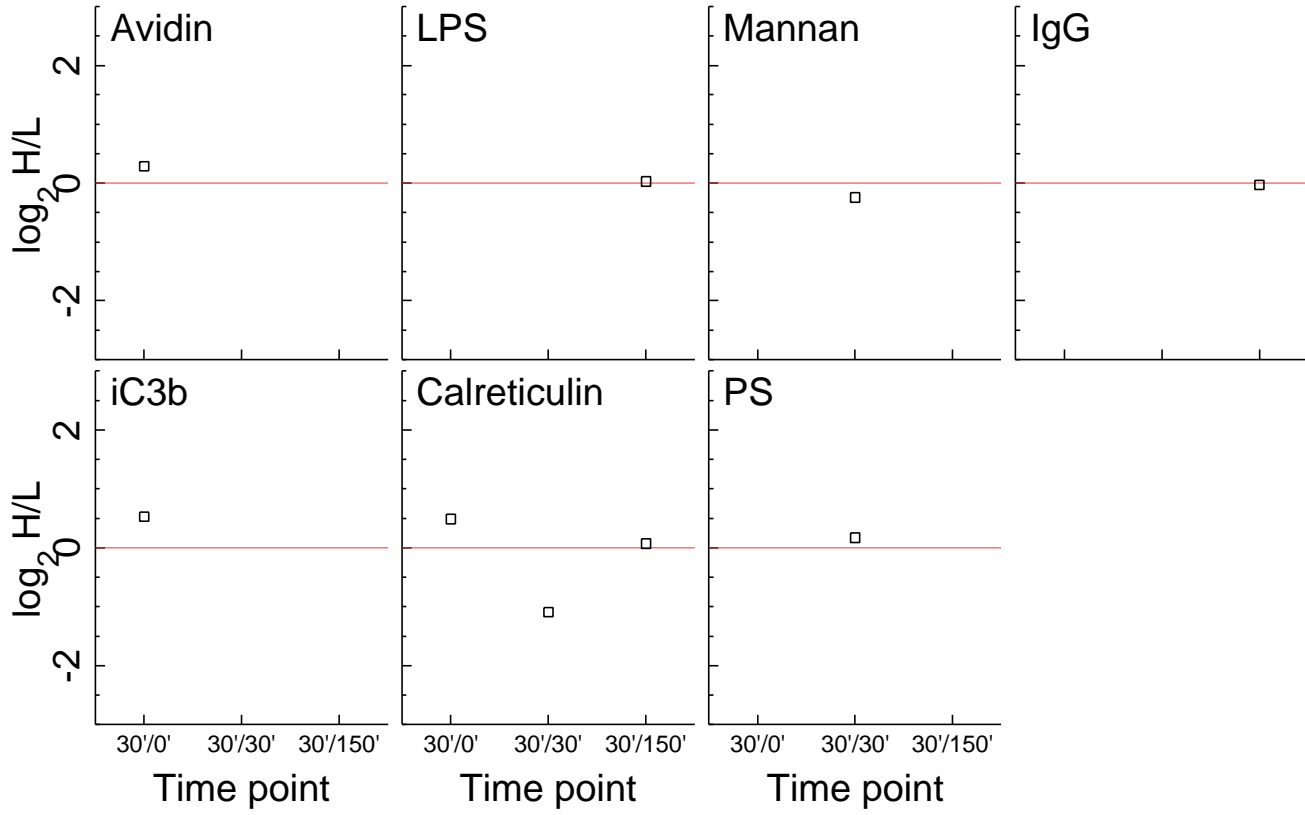

pitpna (P53810)

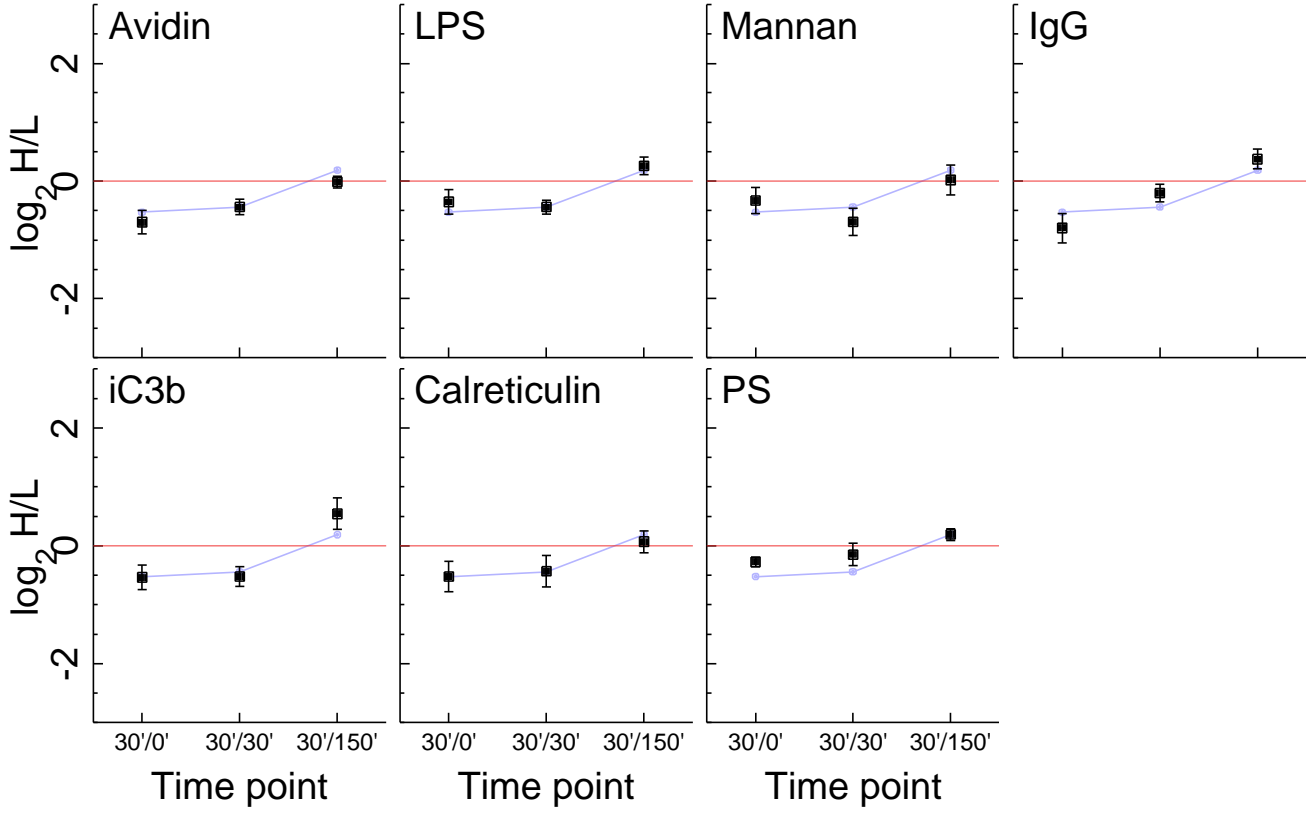

pkm2 (P52480)

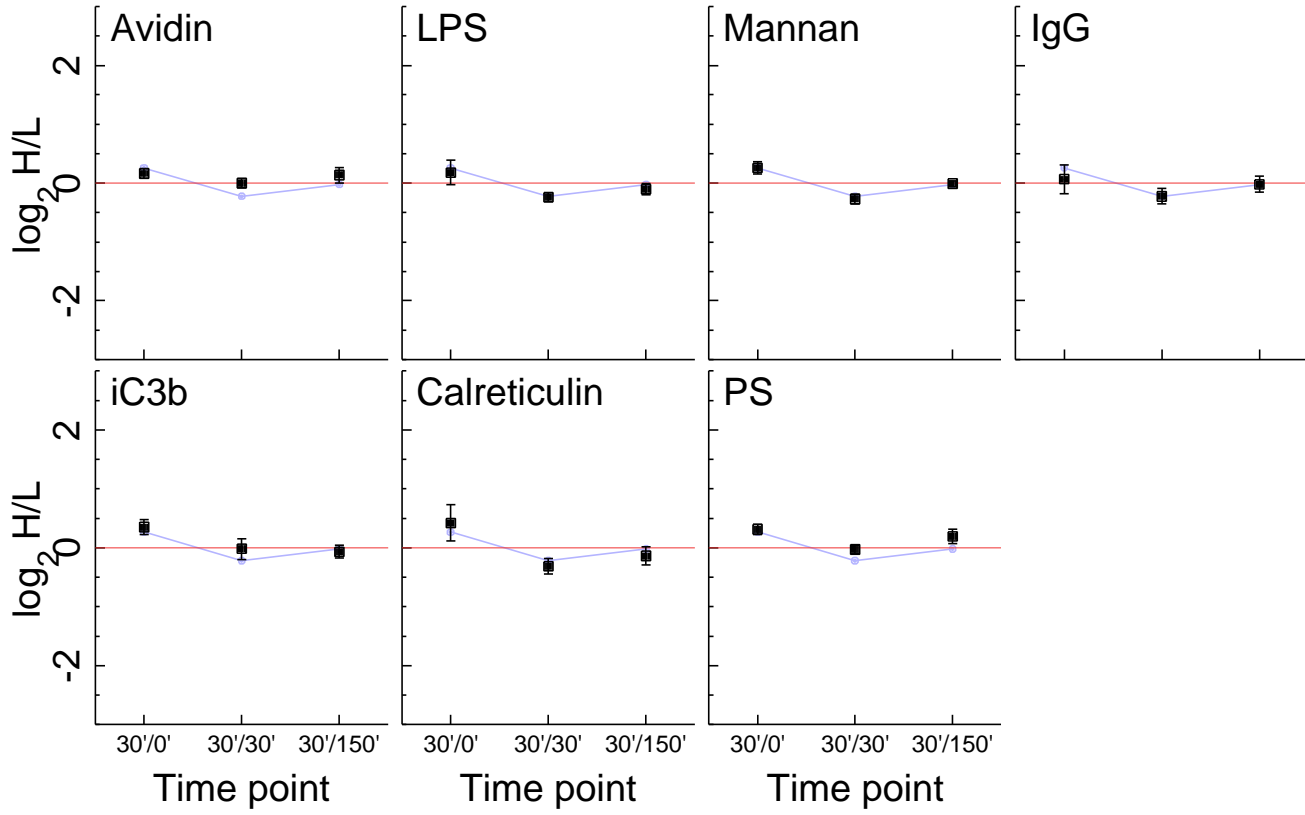

### pkn1 (P70268)

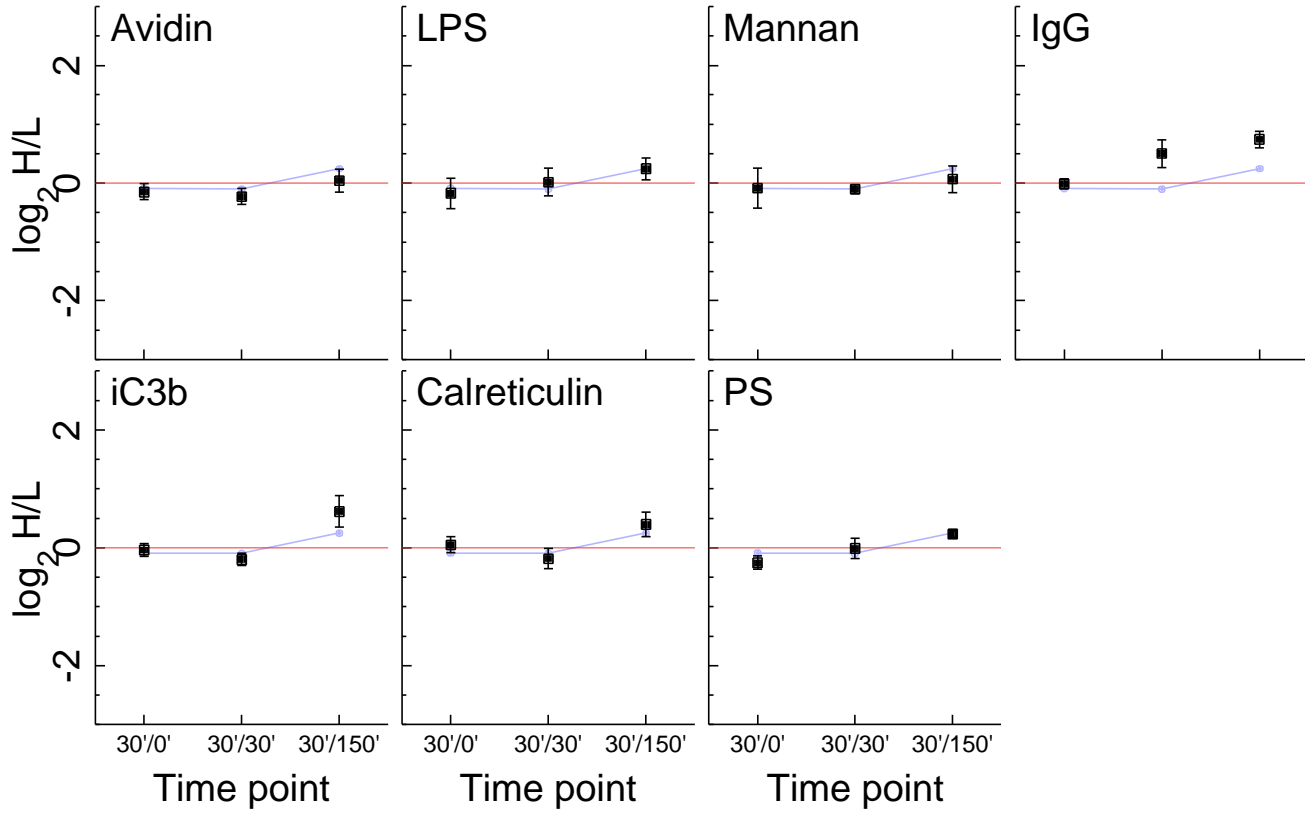



pla2g15 (Q8VEB4)

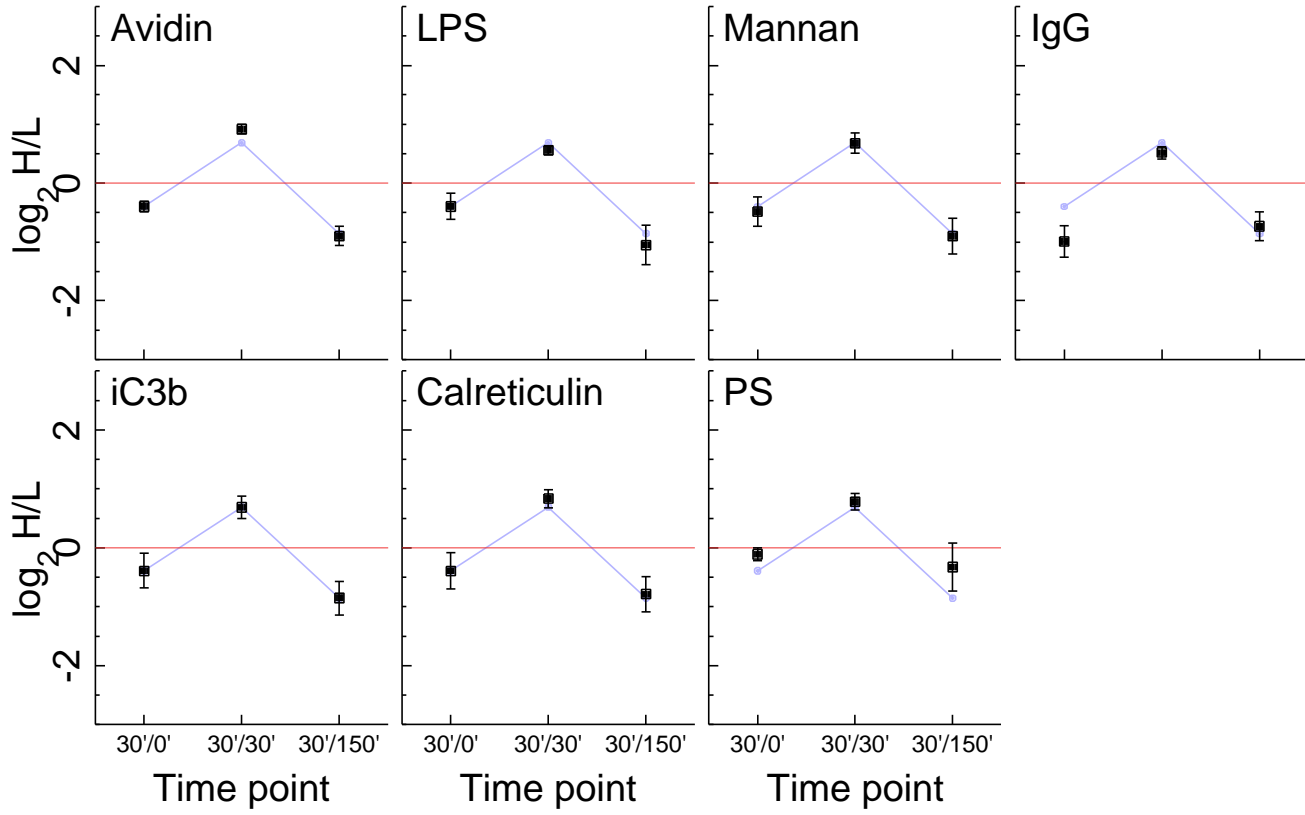

pla2g7 (Q60963)

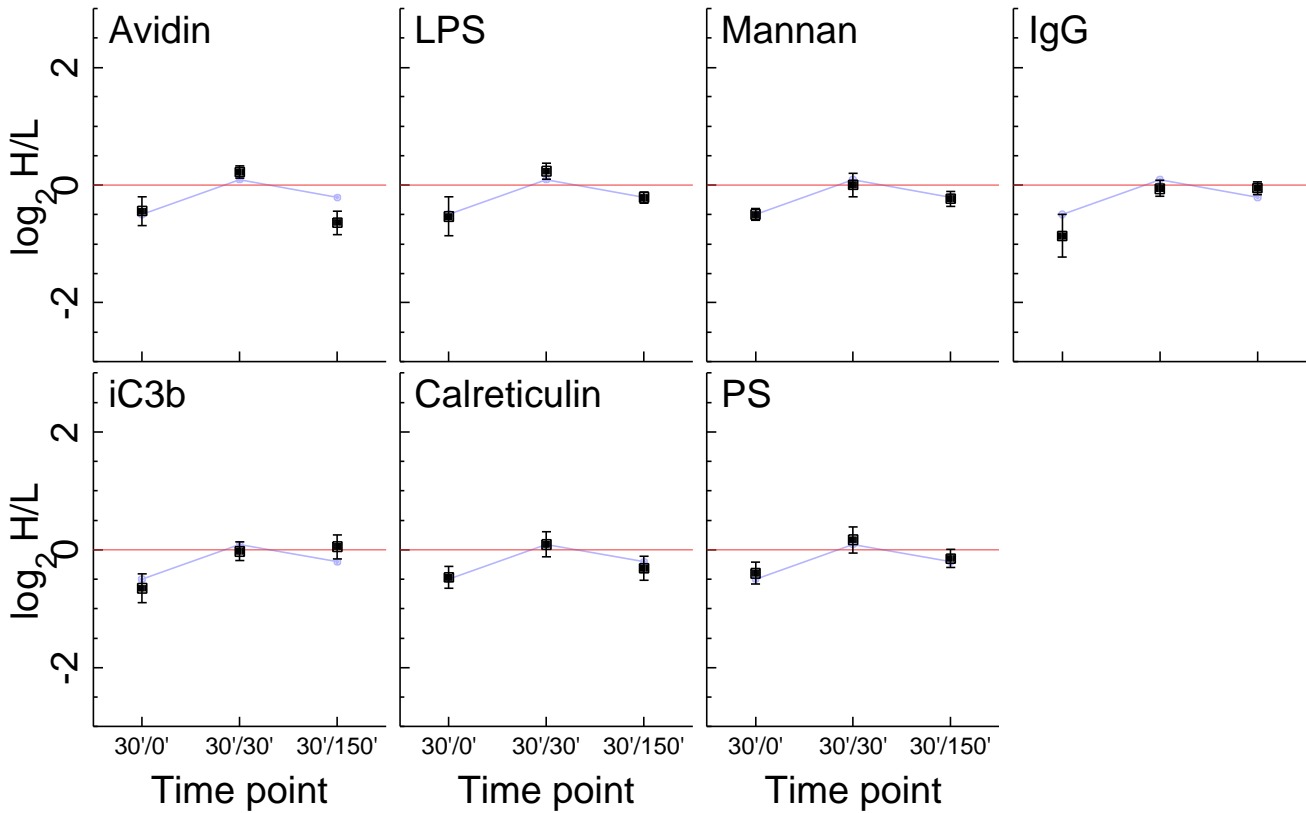

plau (P06869)

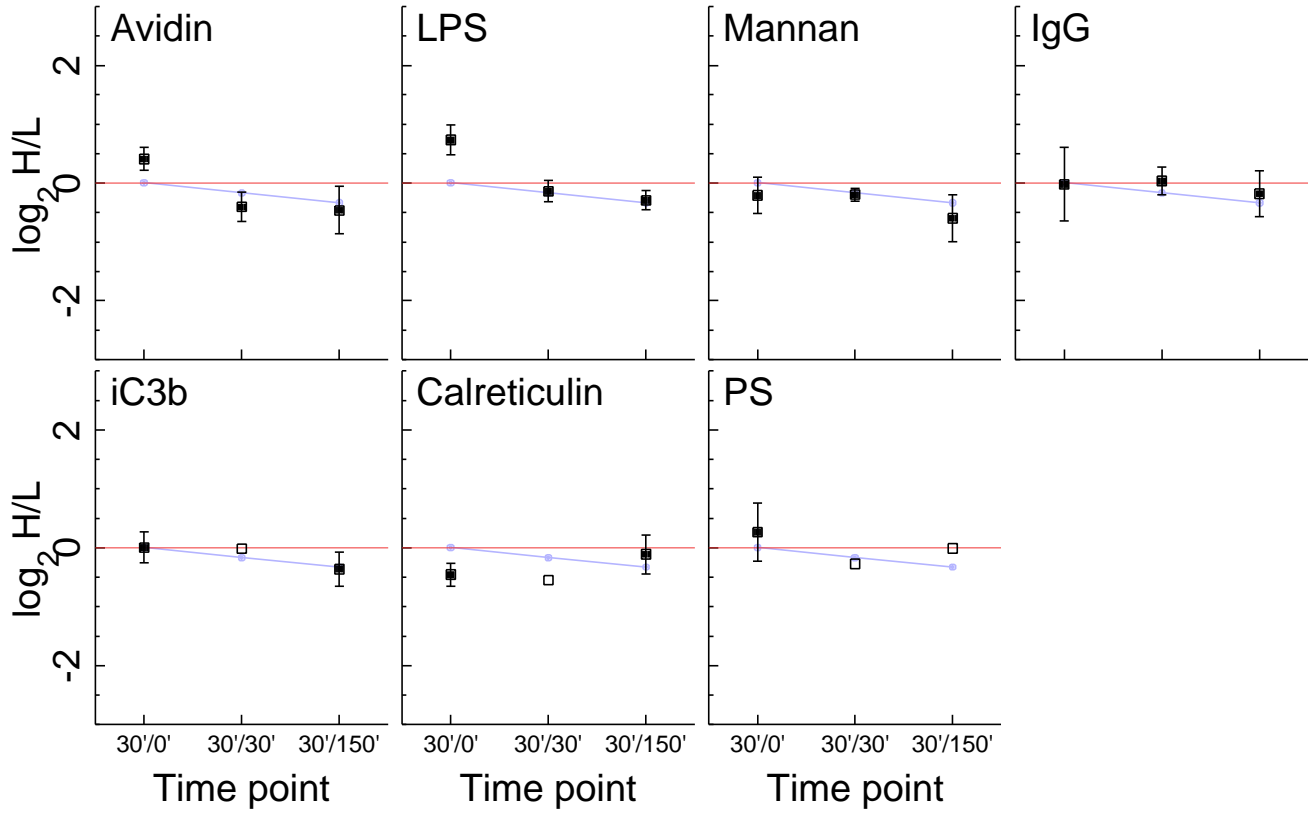

plaur (P35456)

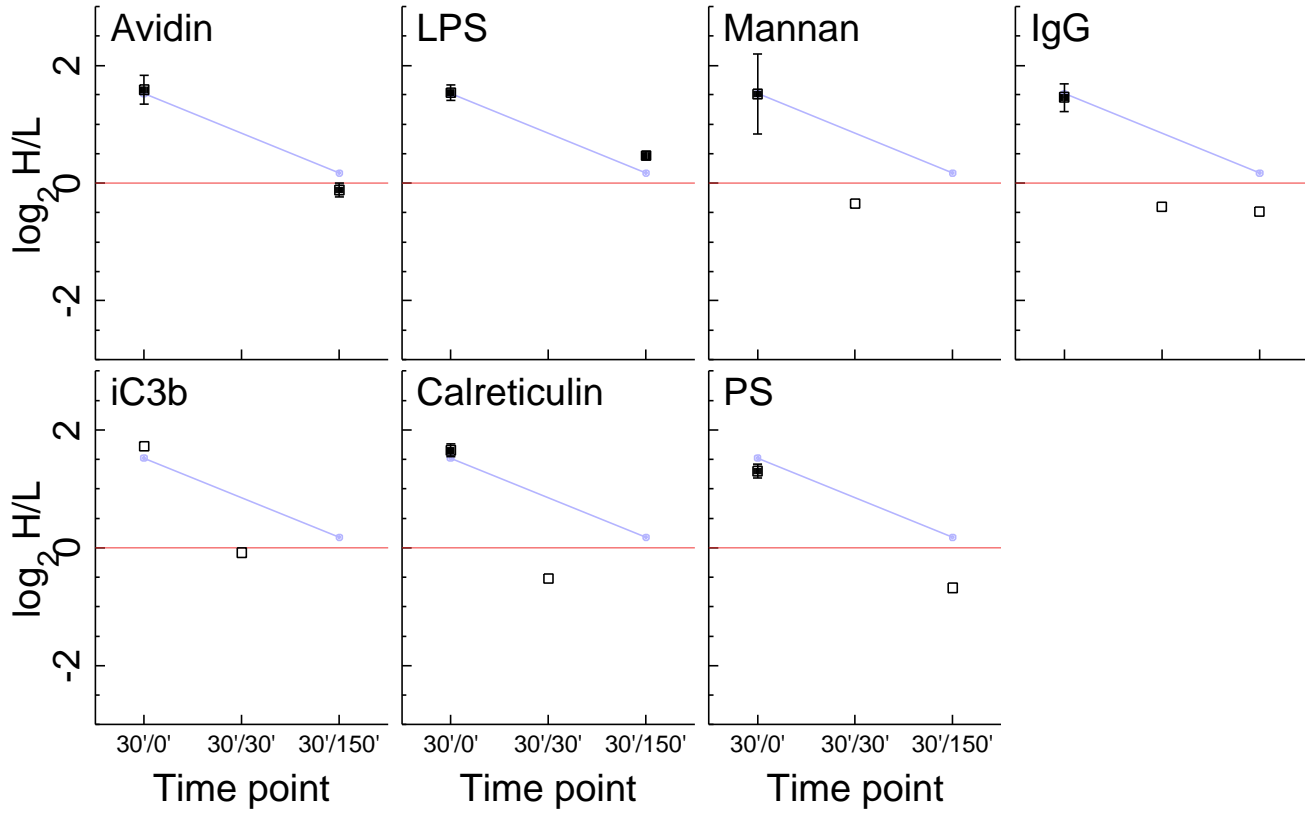

plbd1 (Q8VCI0)

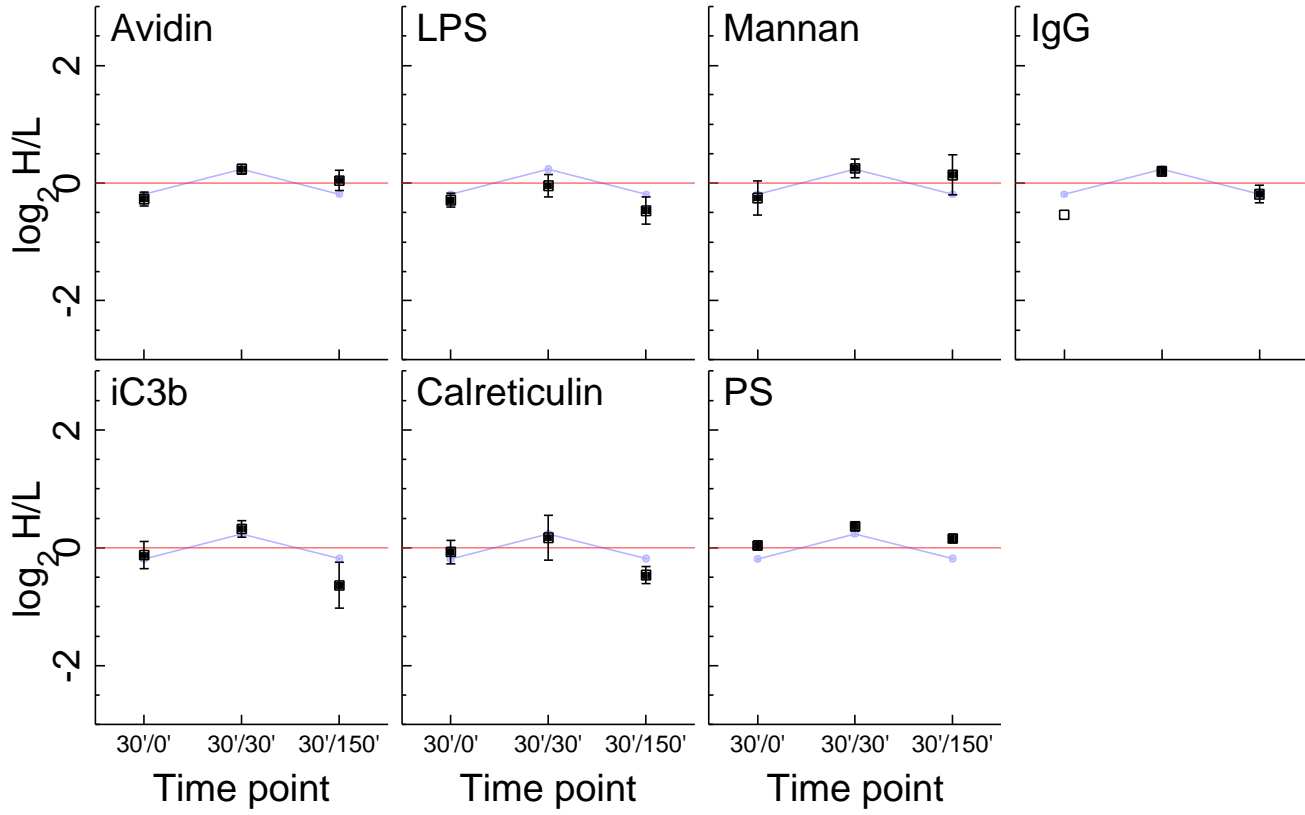

plbd2 (Q3TCN2)

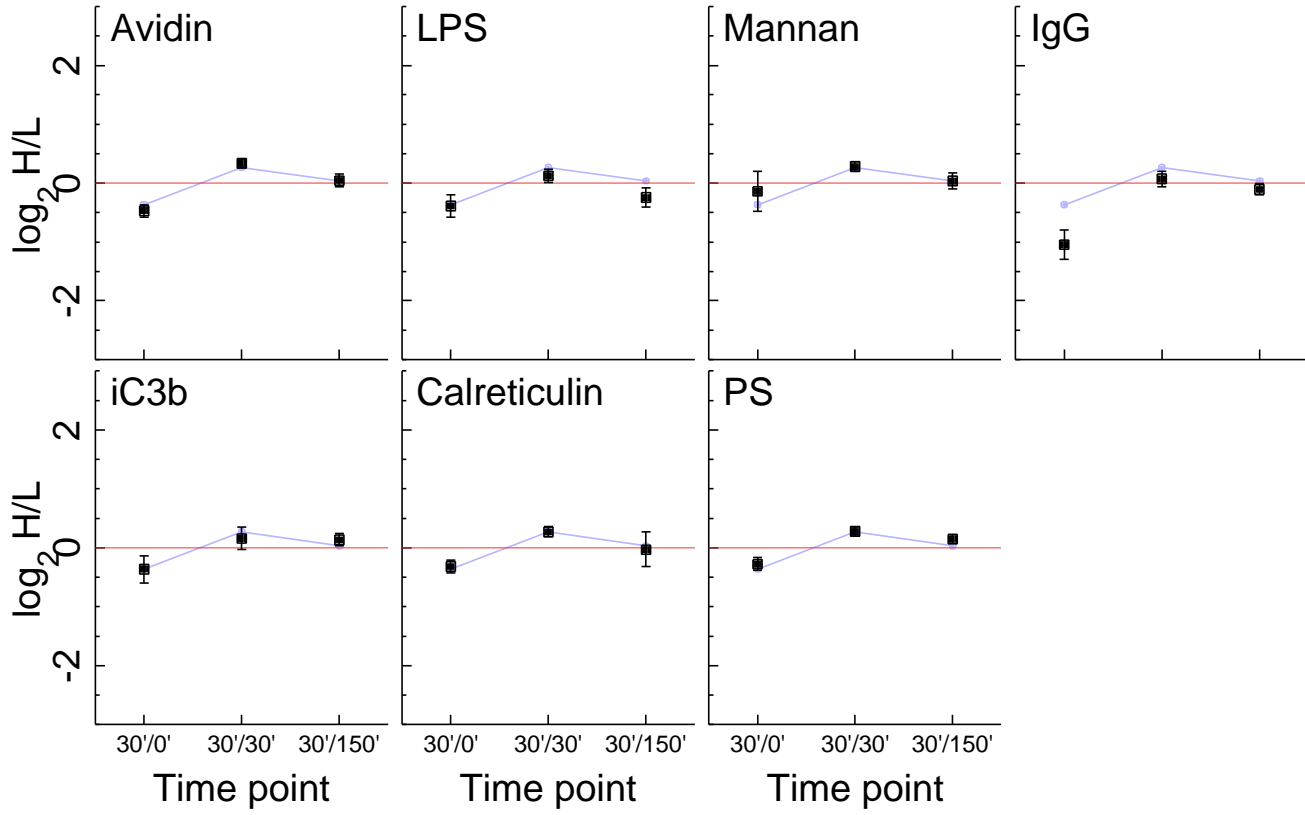

pld1 (Q9Z280)

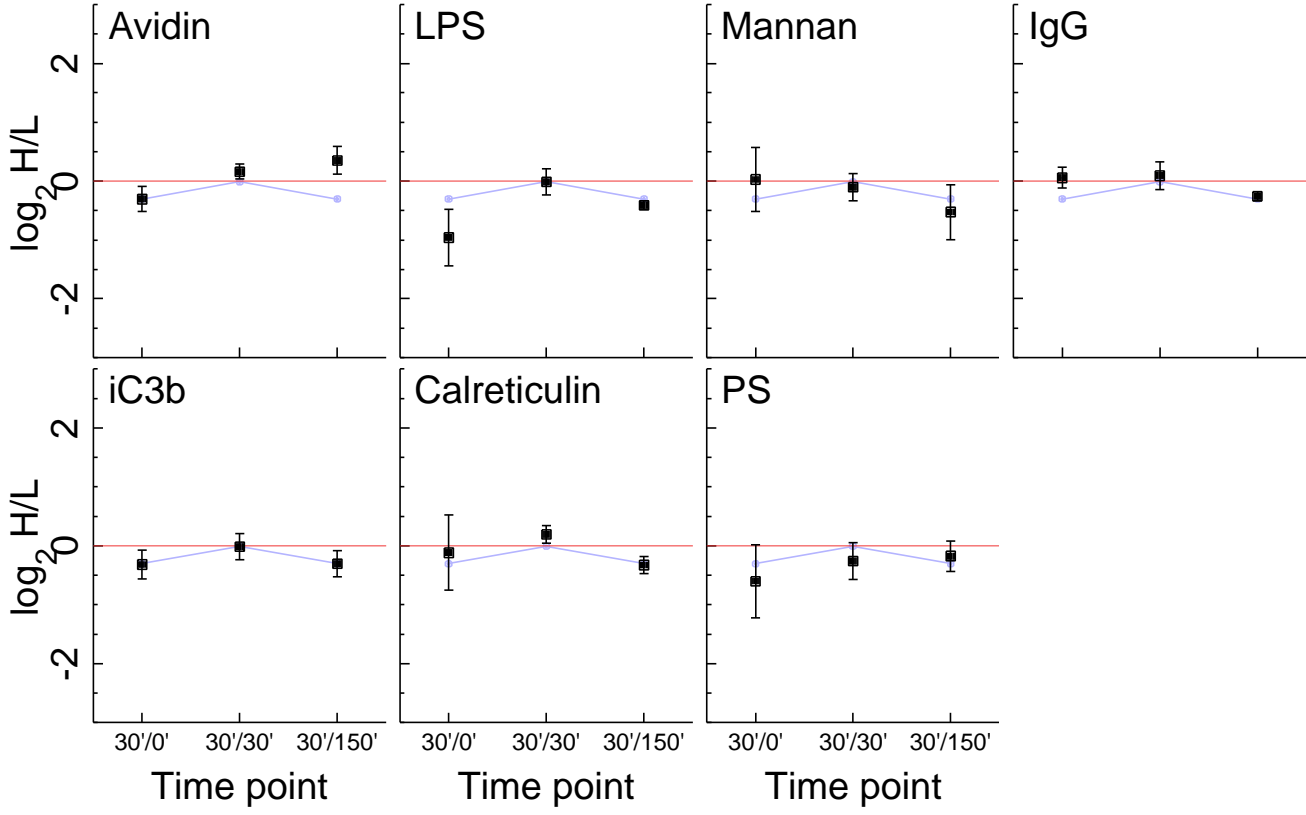

pld3 (O35405)

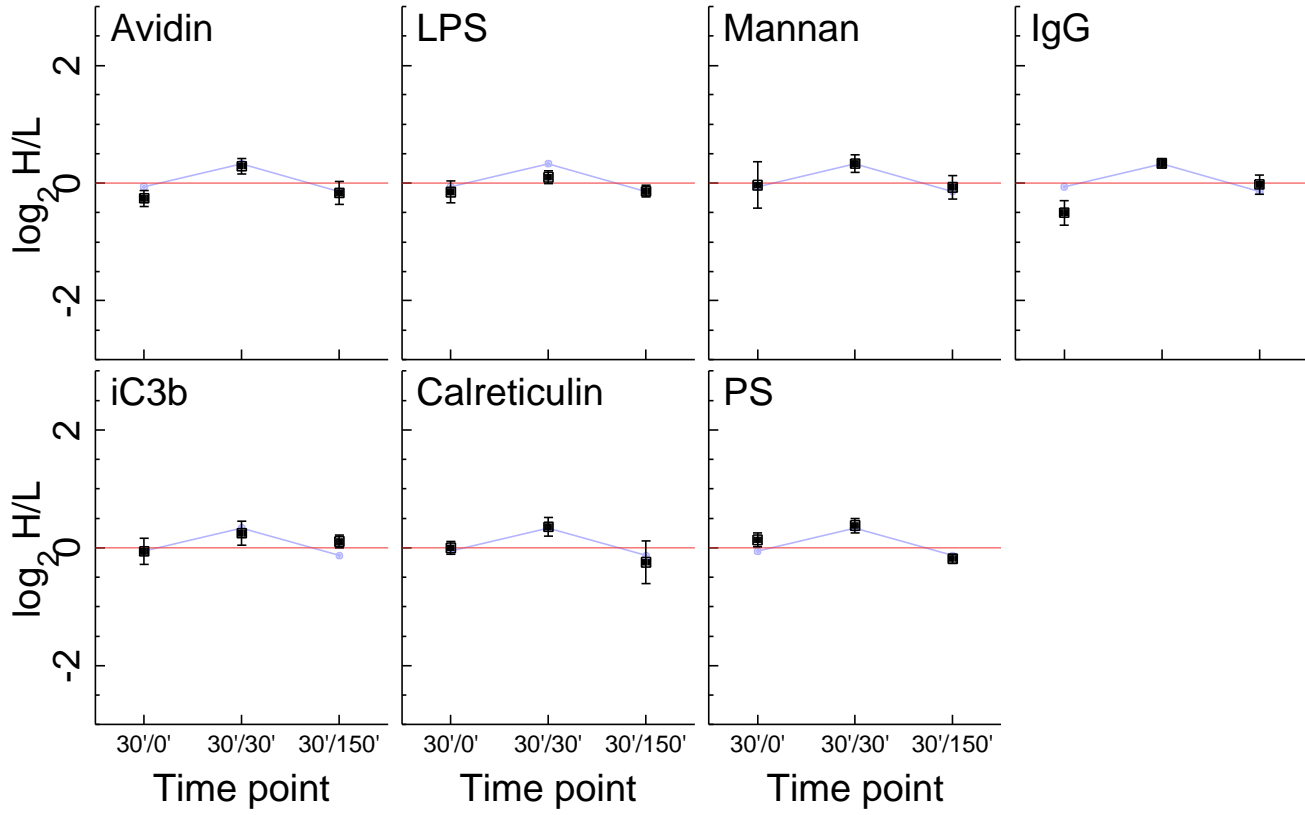



pId4 (Q8BG07)

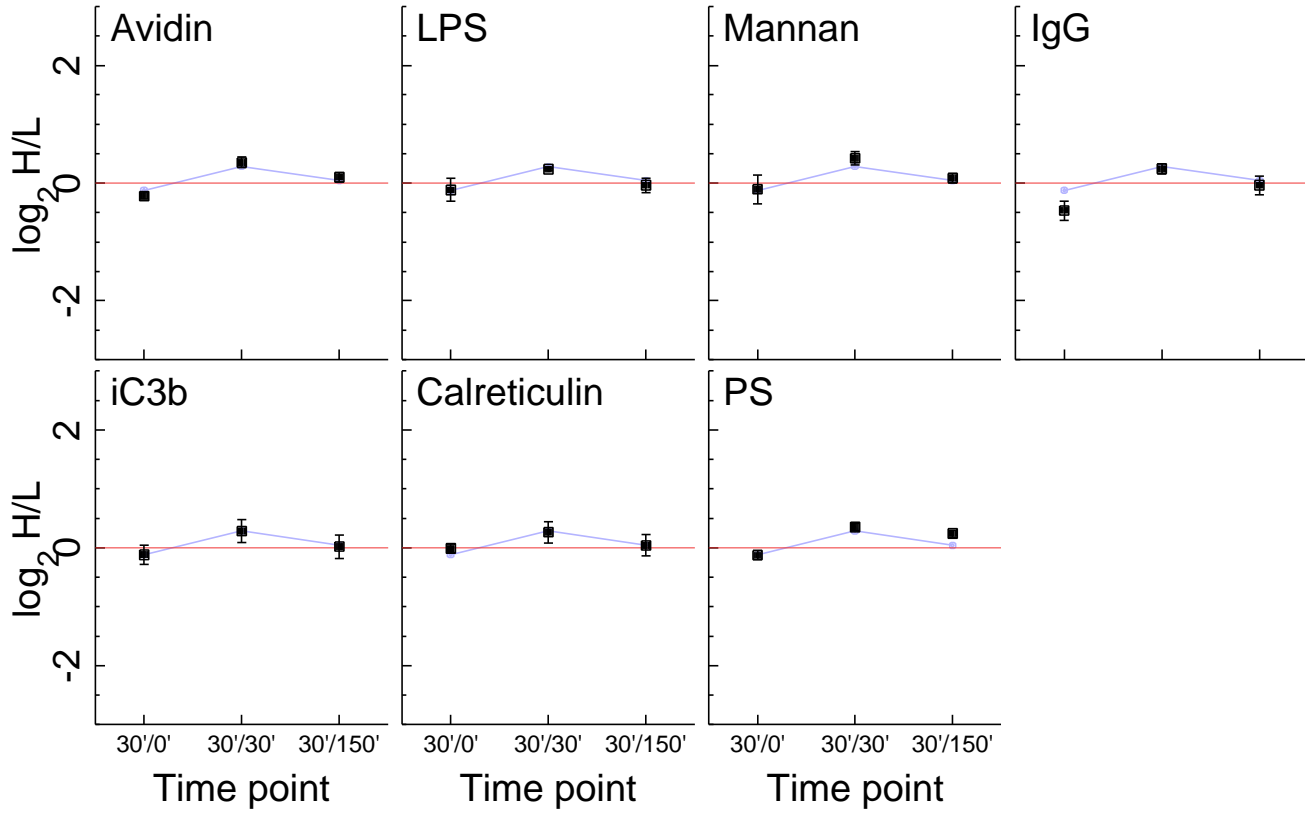

plec (E9QMZ5)

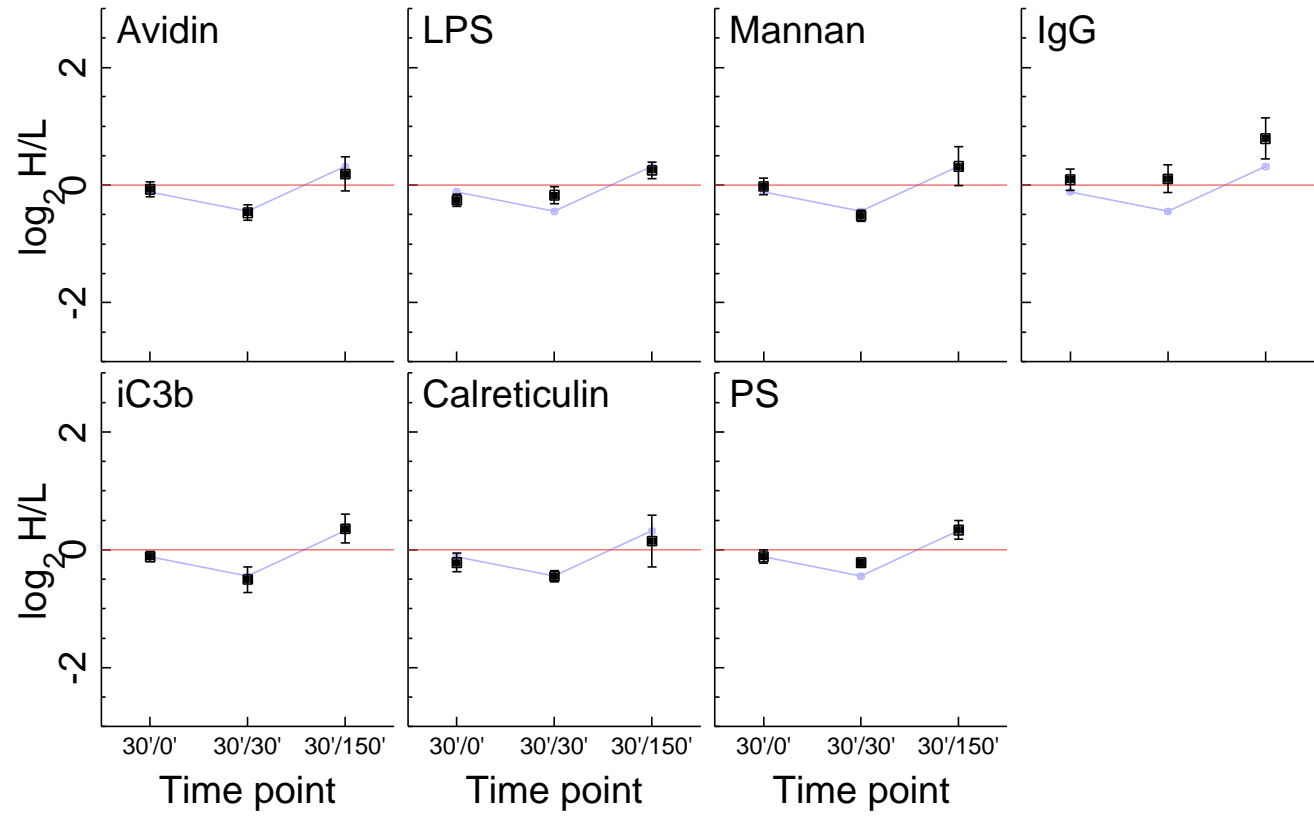

plekha1 (Q8BUL6)

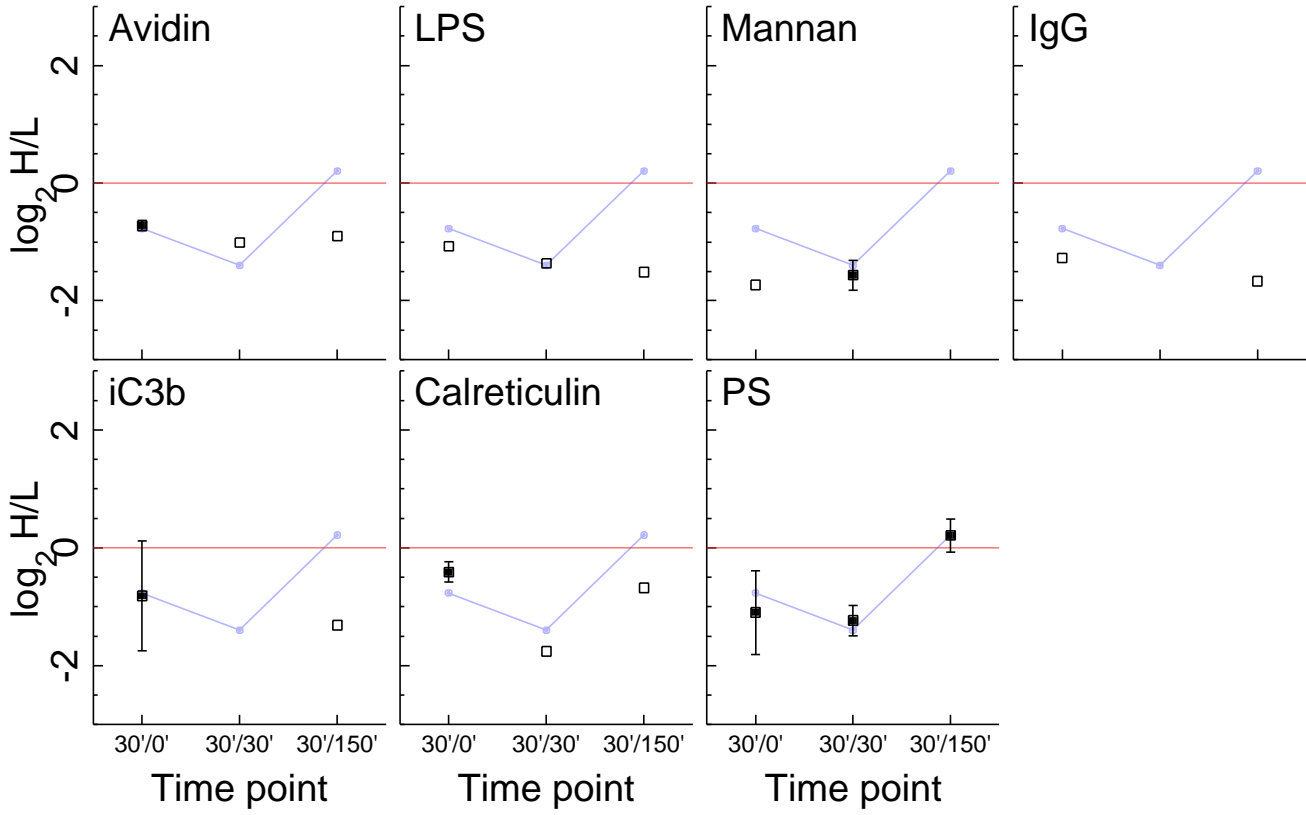

plekho1 (Q9JIY0)

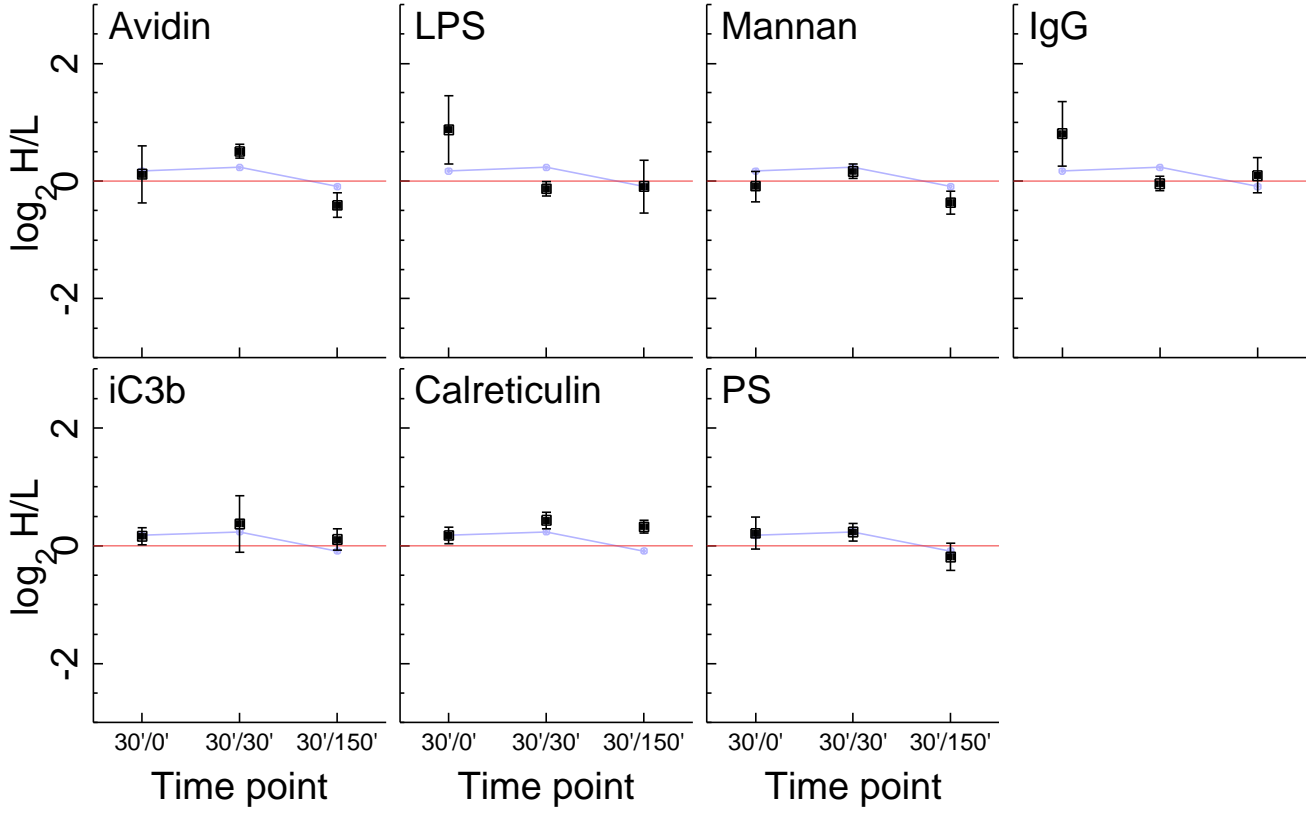

plekho2 (Q8K124)

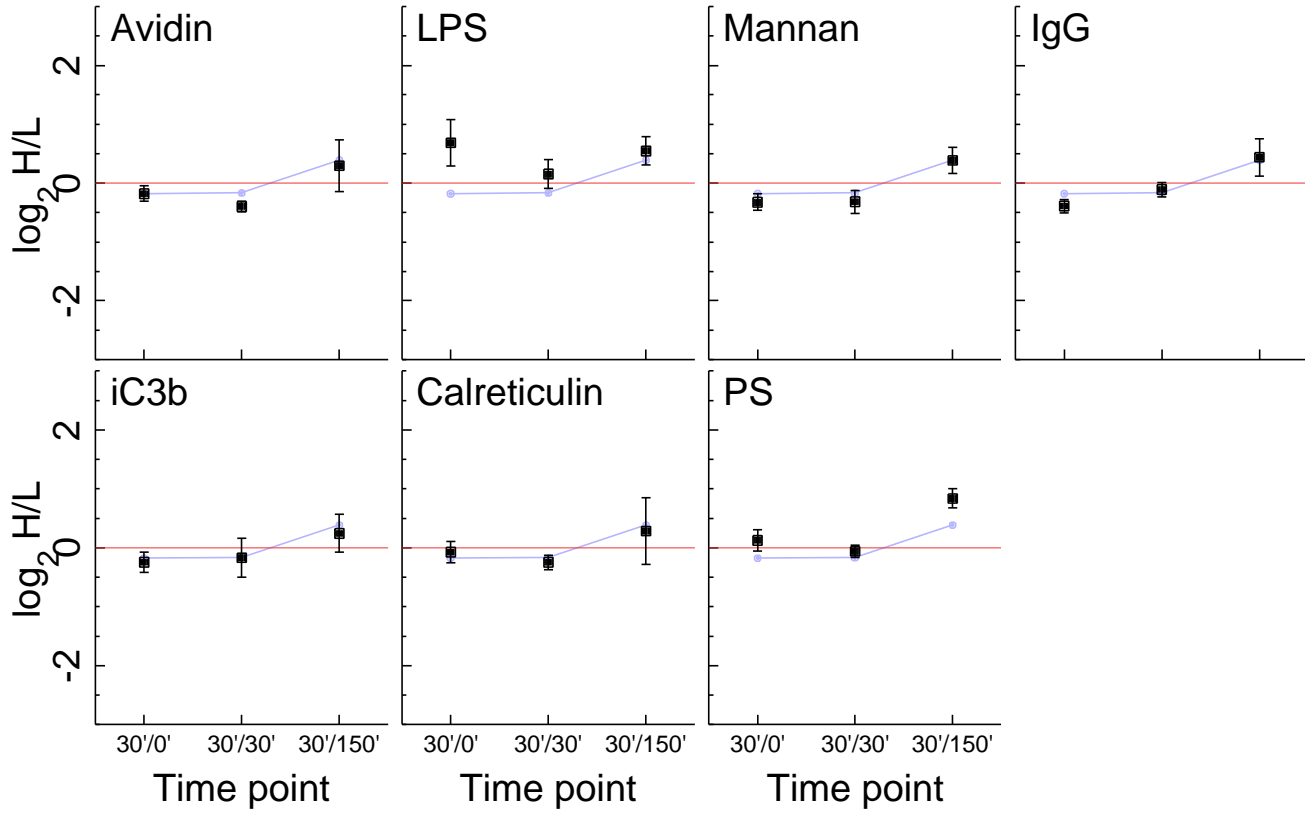

plek (Q9JHK5)

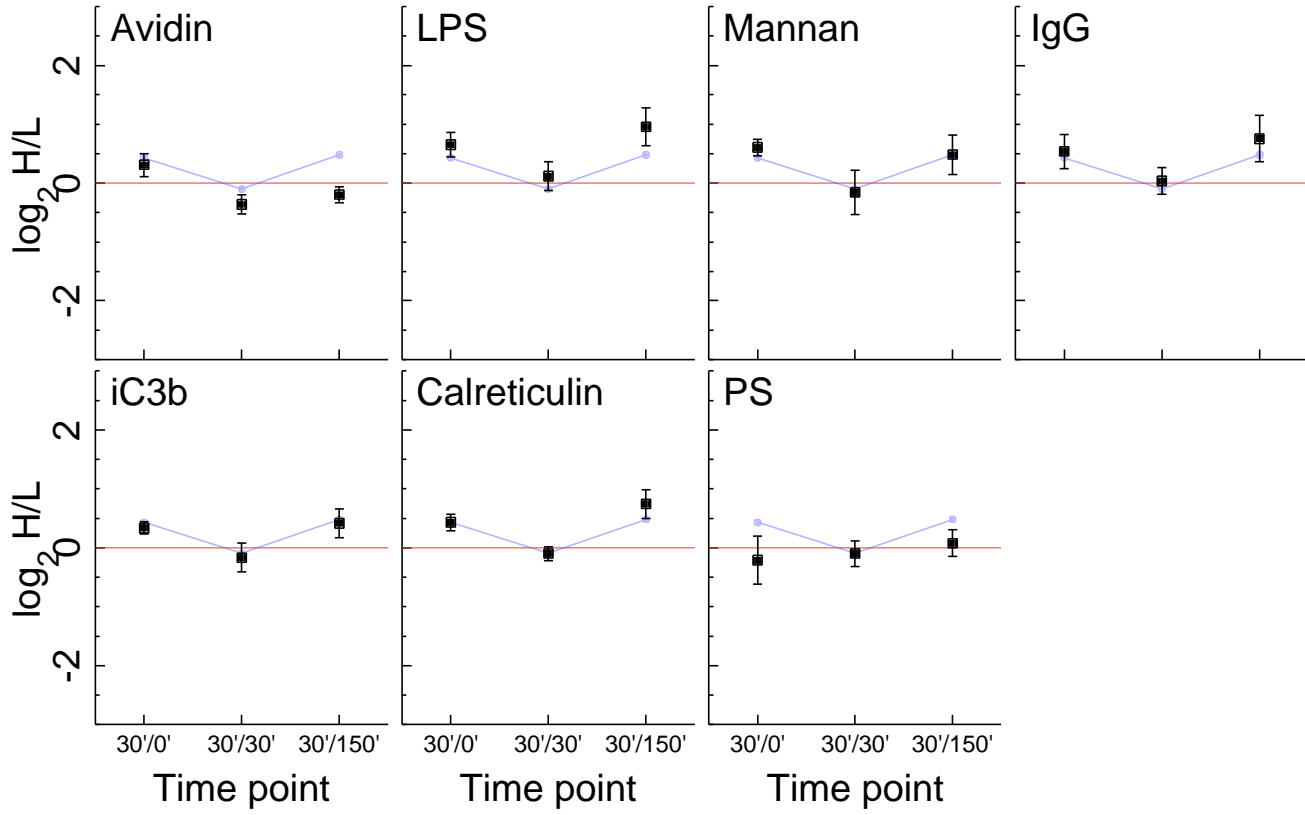

plod1 (Q9R0E2)

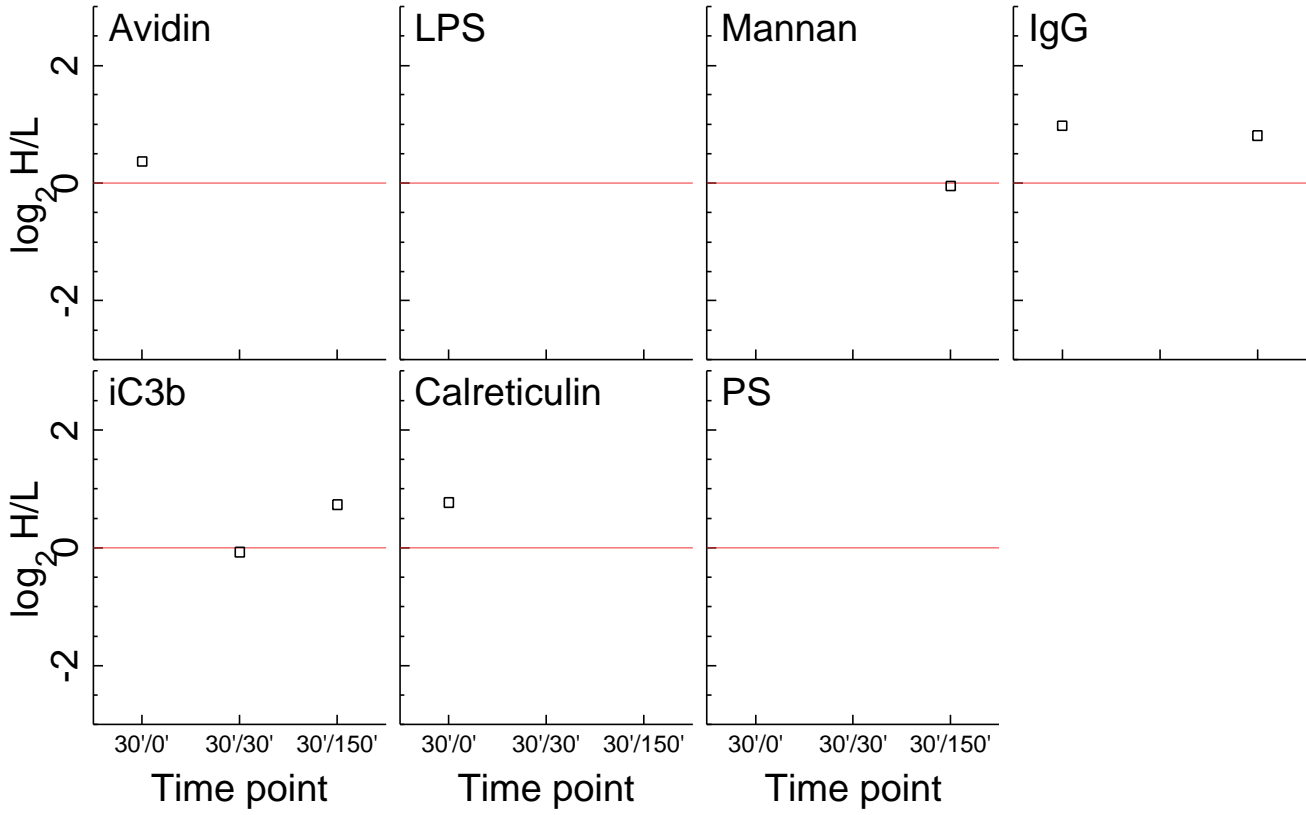

plod3 (Q9R0E1)

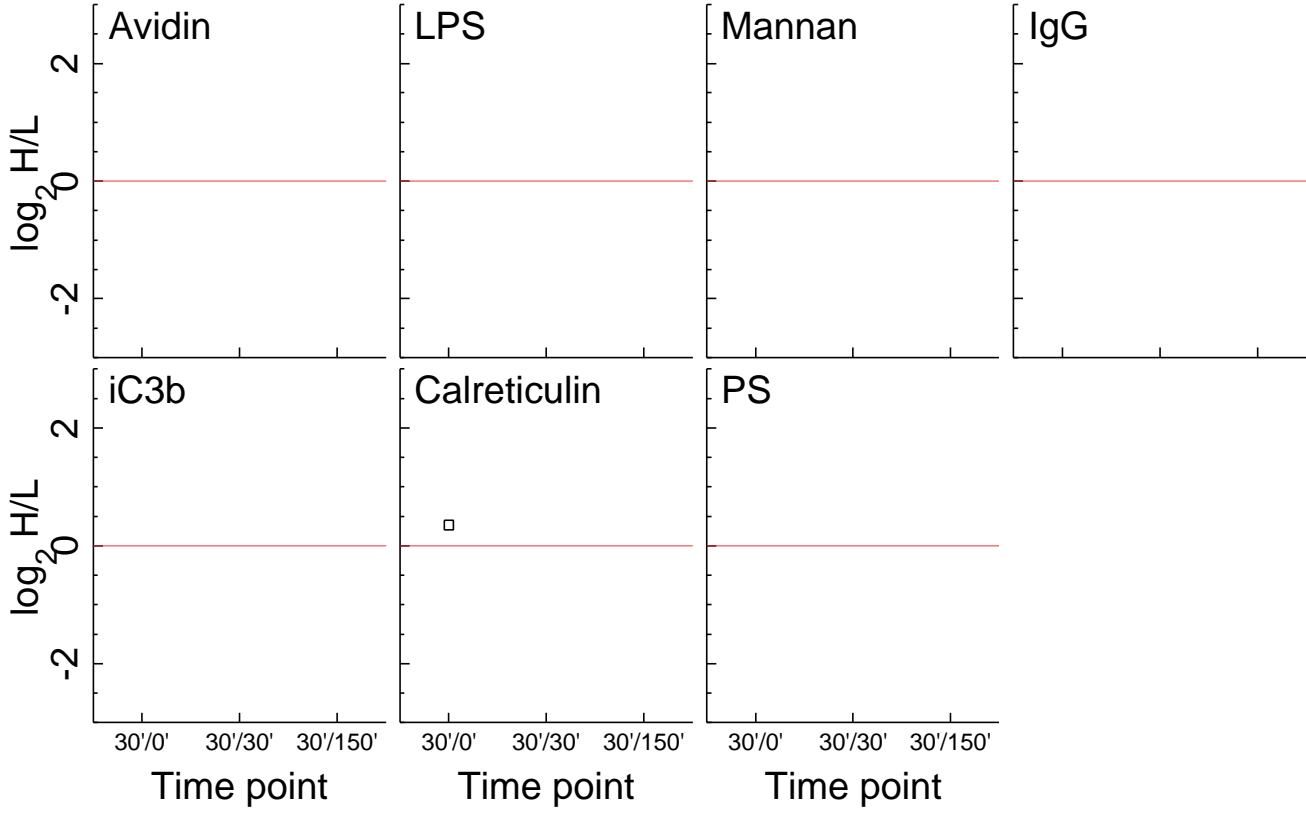



### plp2 (Q9R1Q7)

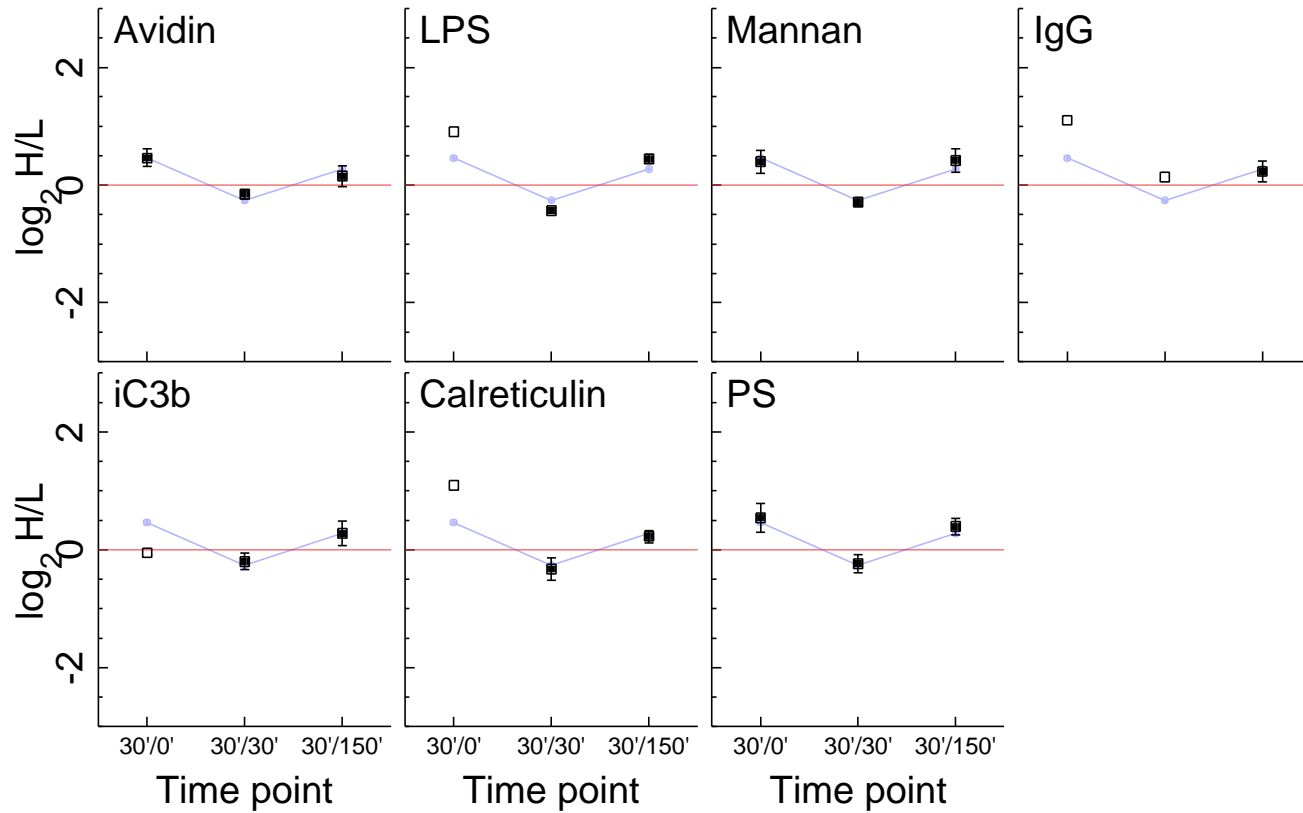

plscr3 (Q9JIZ9)

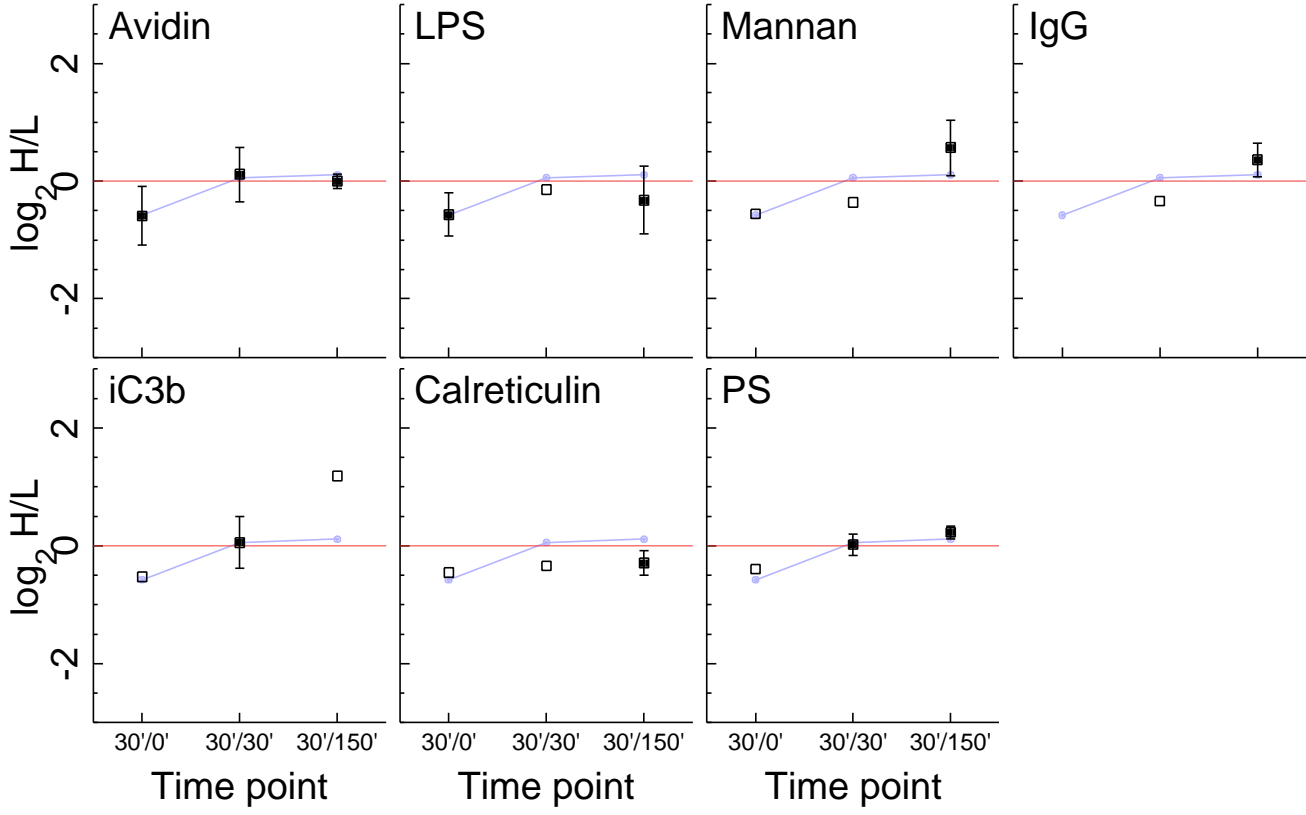

pltp (P55065)

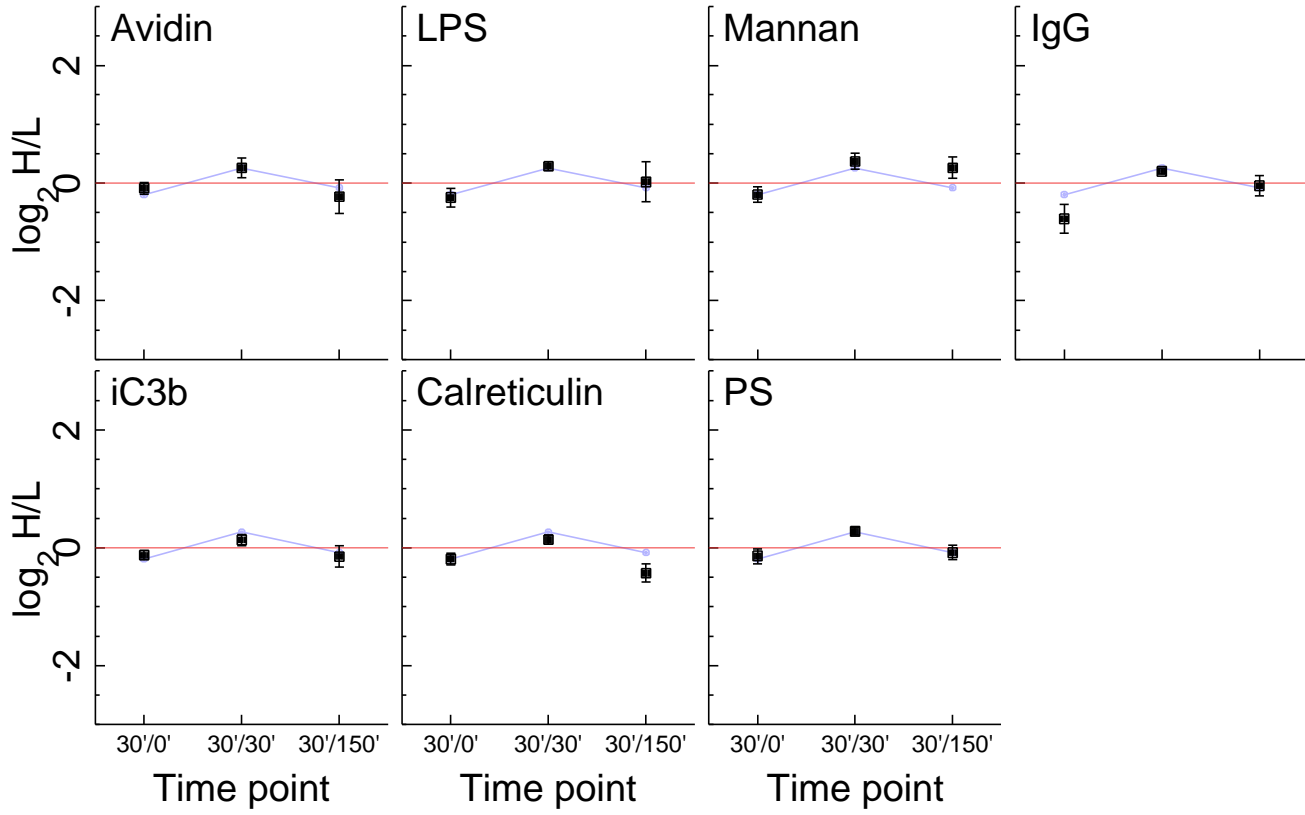

plxdc1 (Q91ZV7)

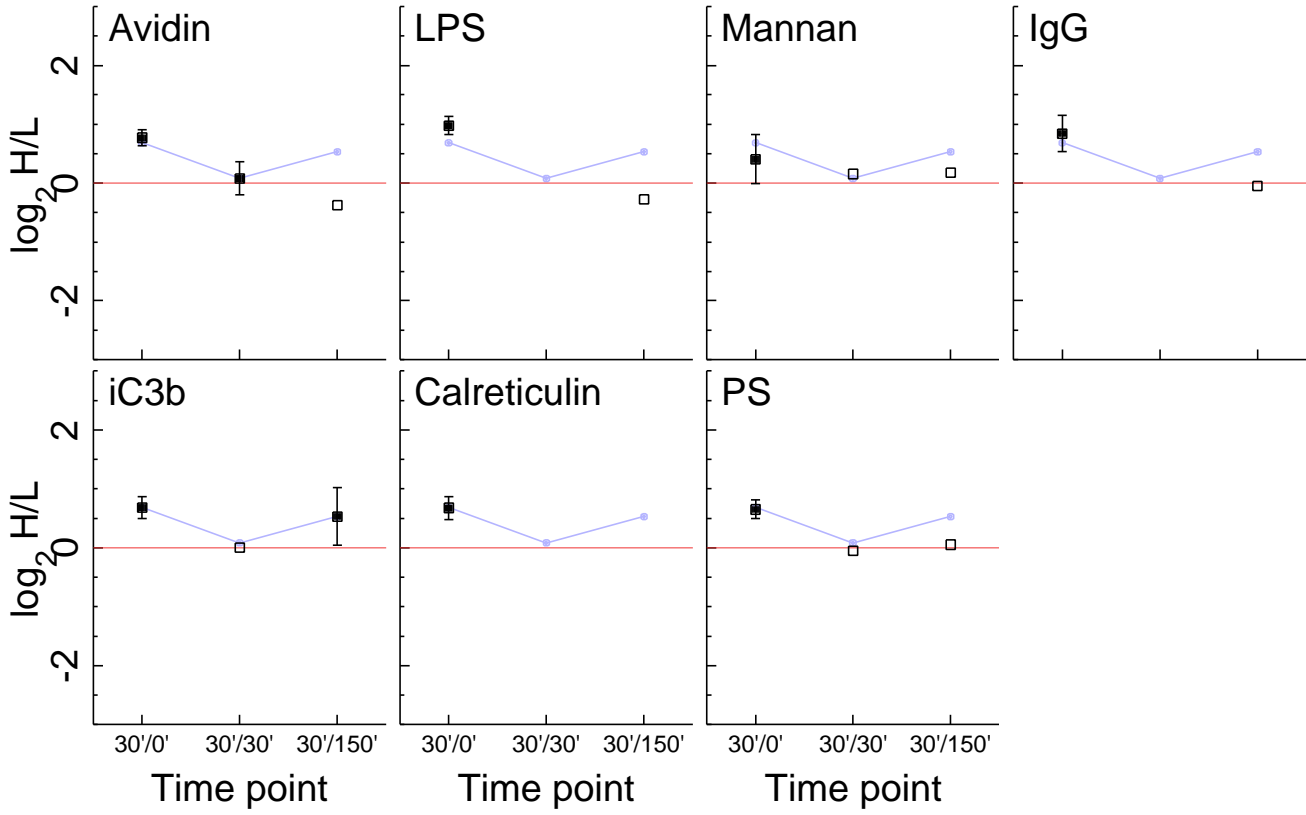

plxna1 (P70206)

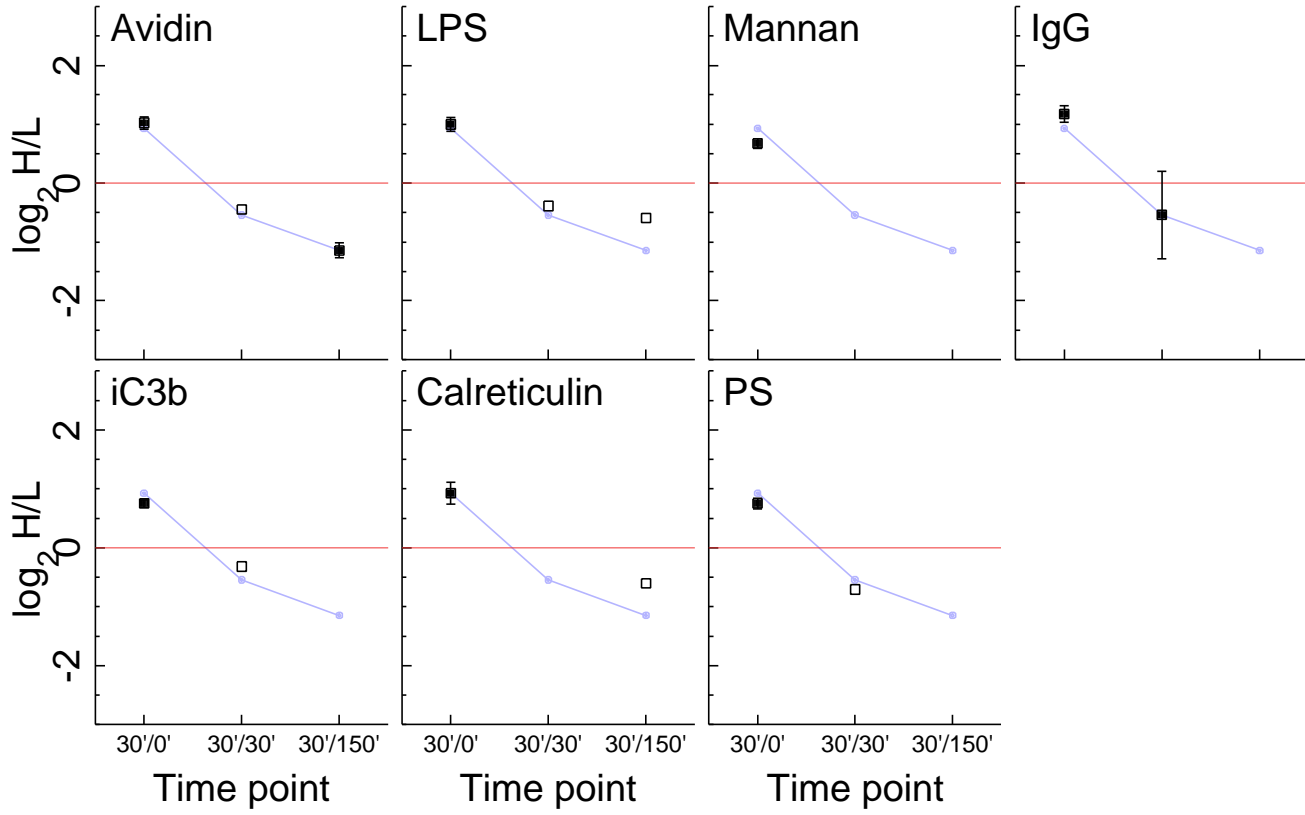

plxnb2 (B2RXS4)

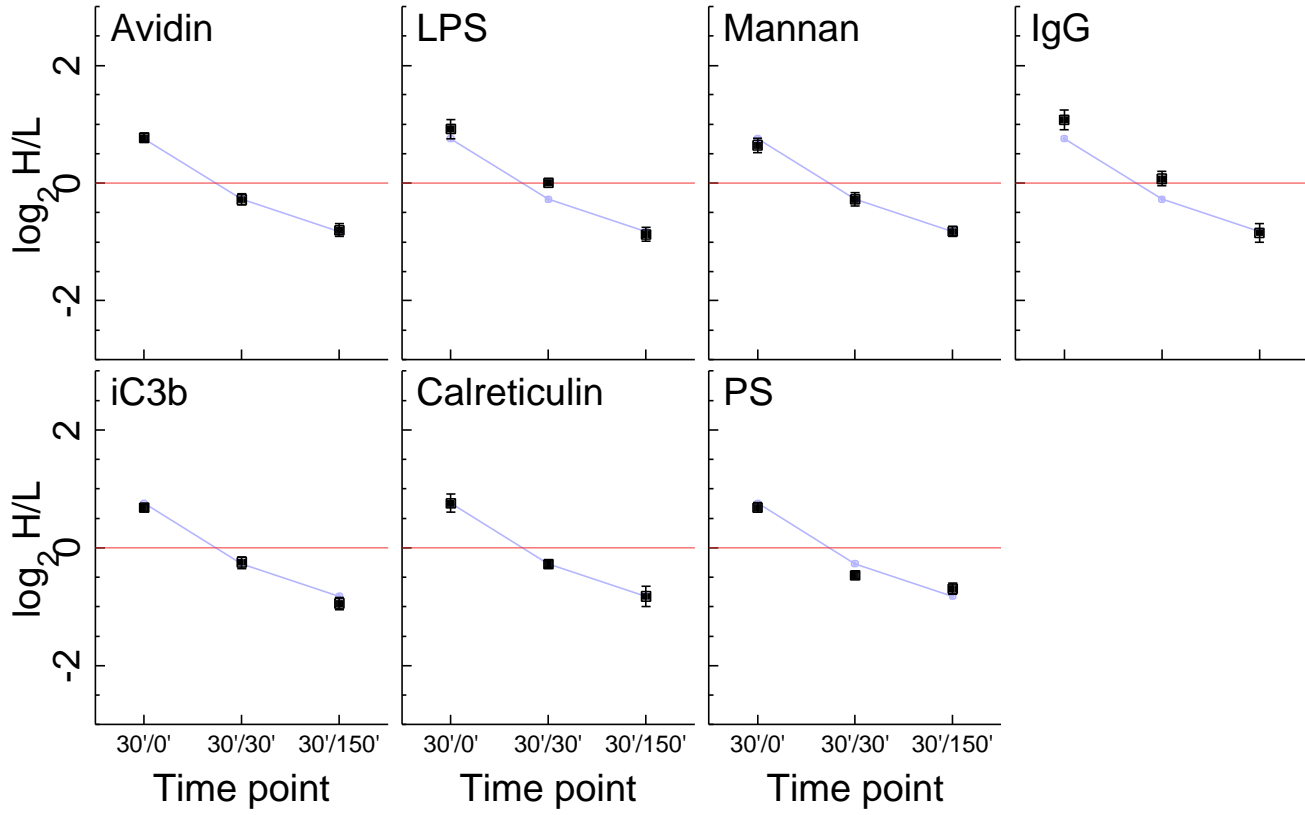

pnp (P23492)

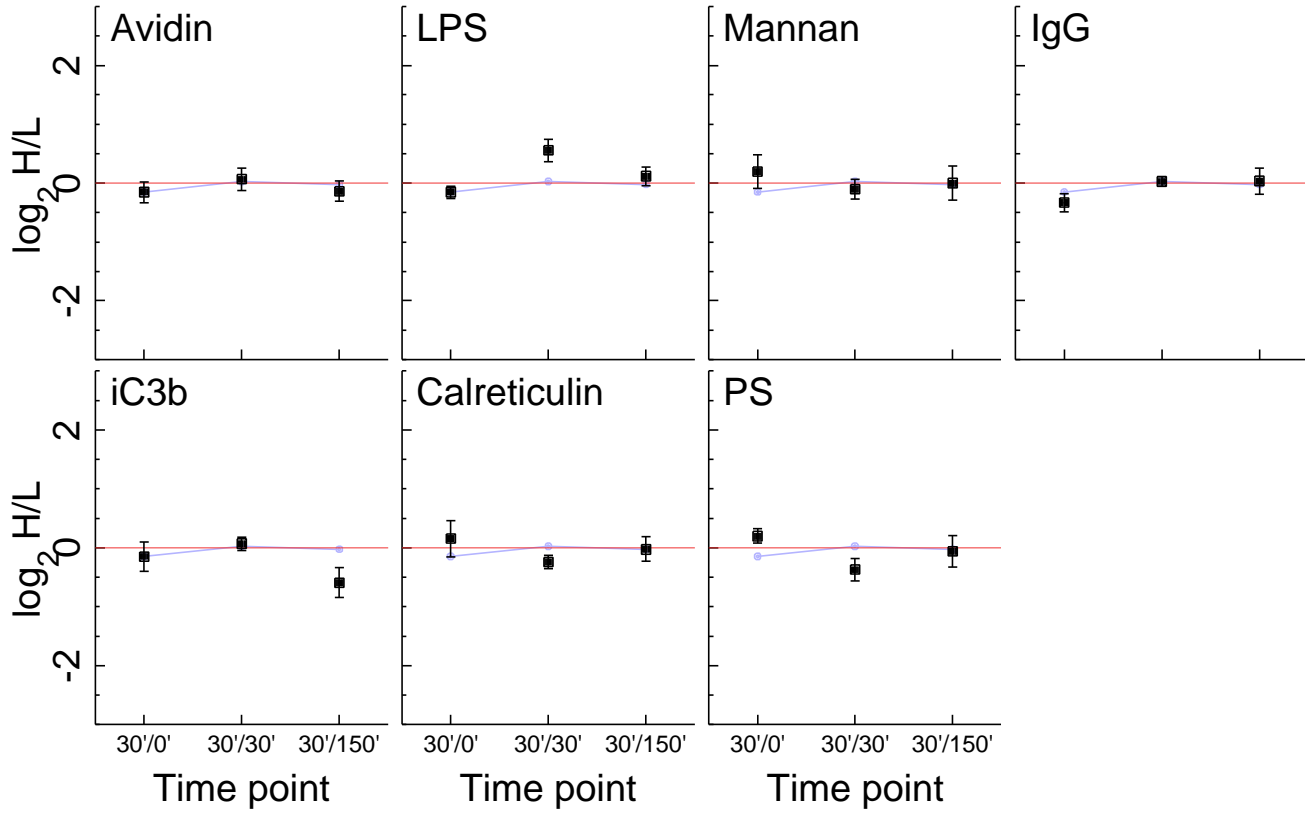

### pon2 (Q62086)

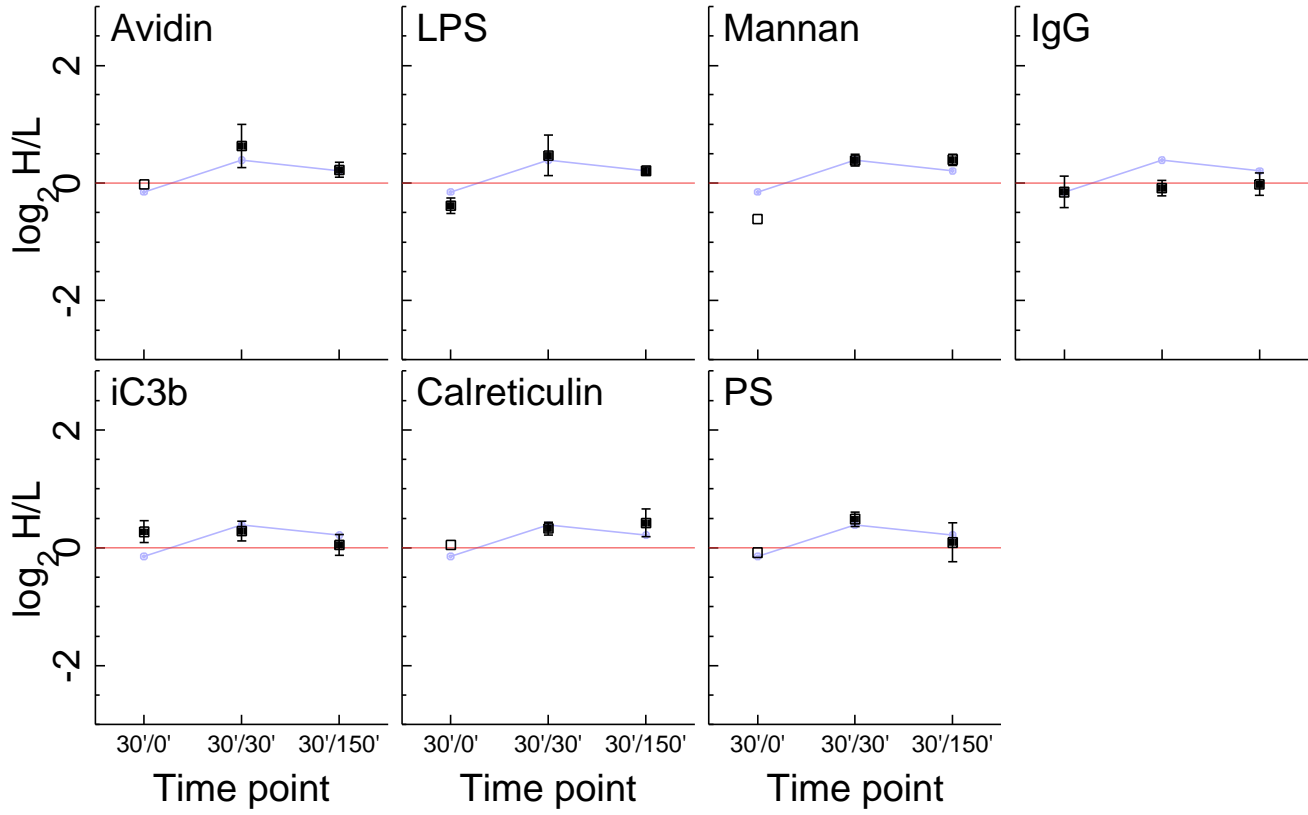



pon3 (Q62087)

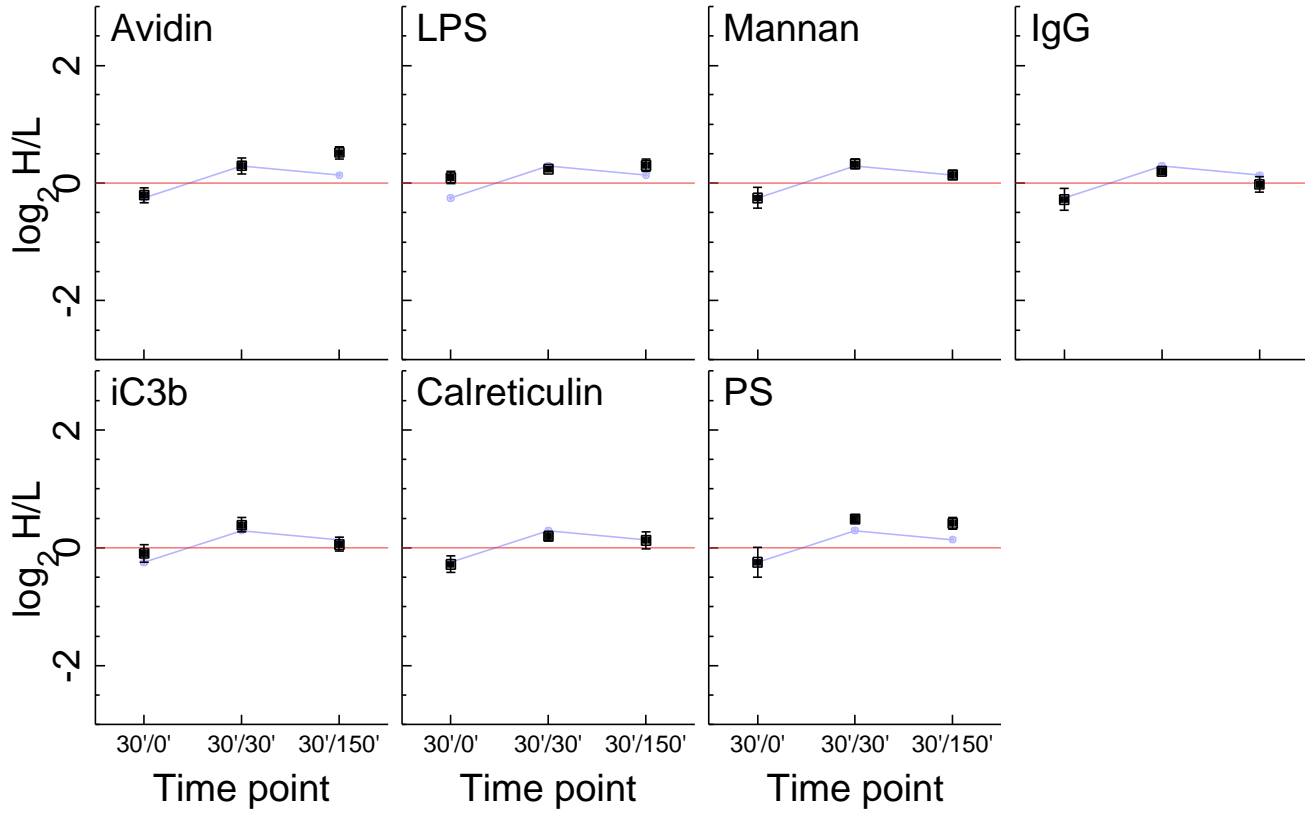

por (P37040)

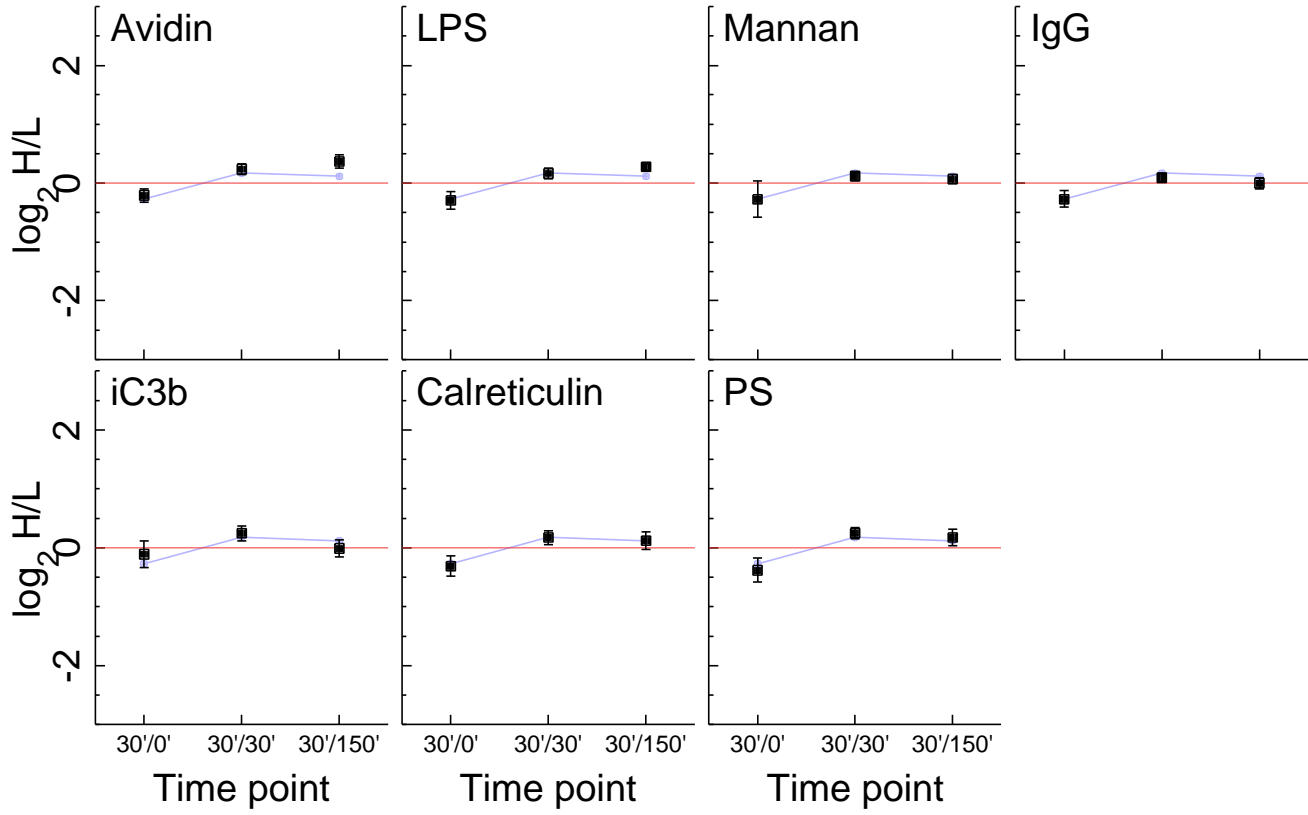

ppia (P17742)

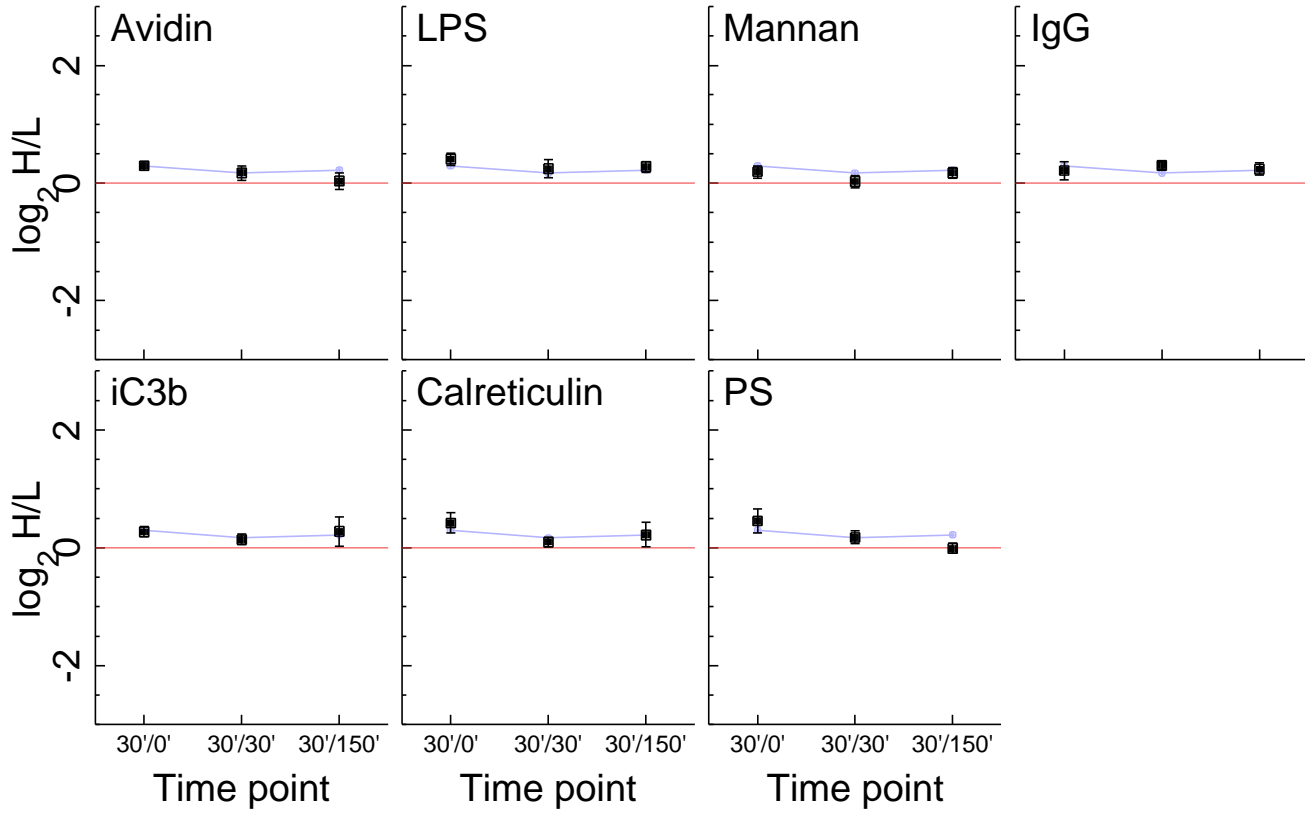

ppib (P24369)

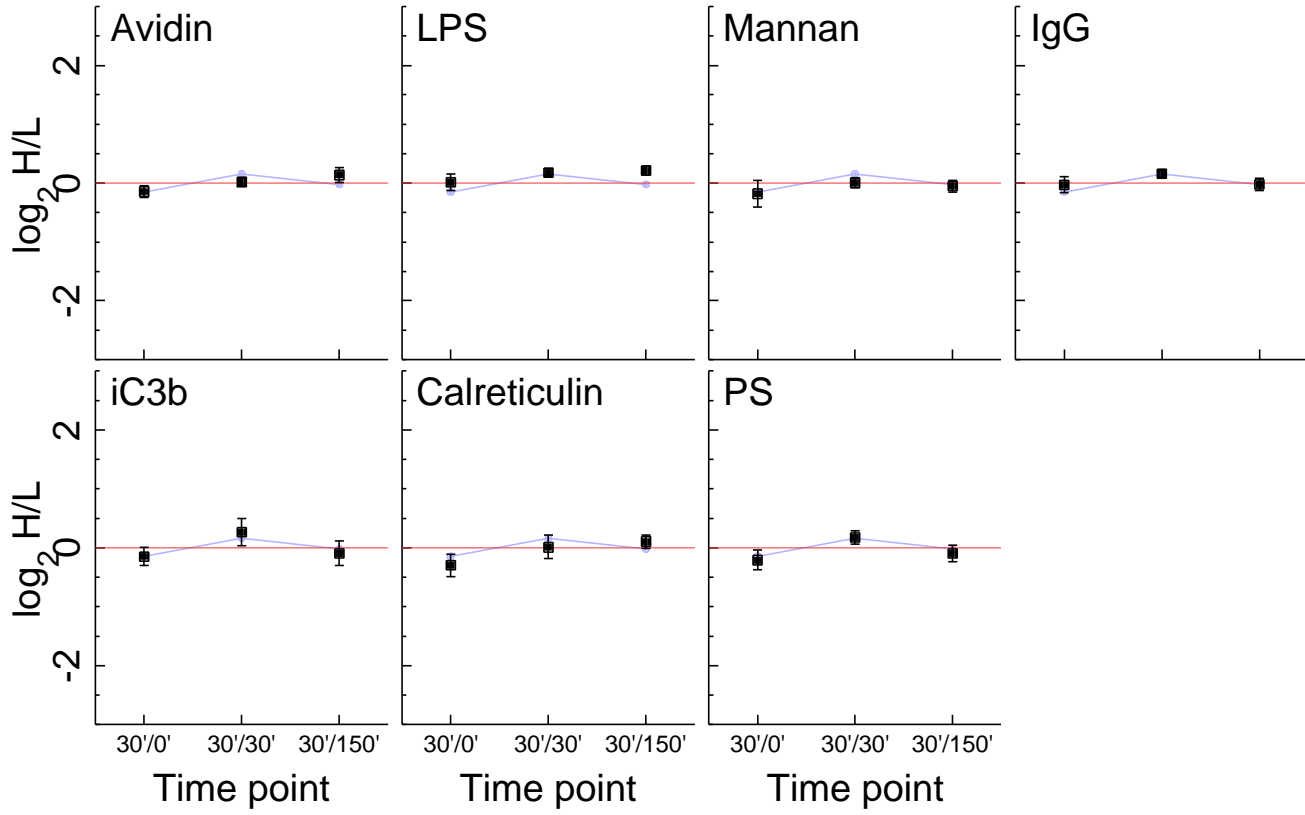

ppm1h (Q3UYC0)

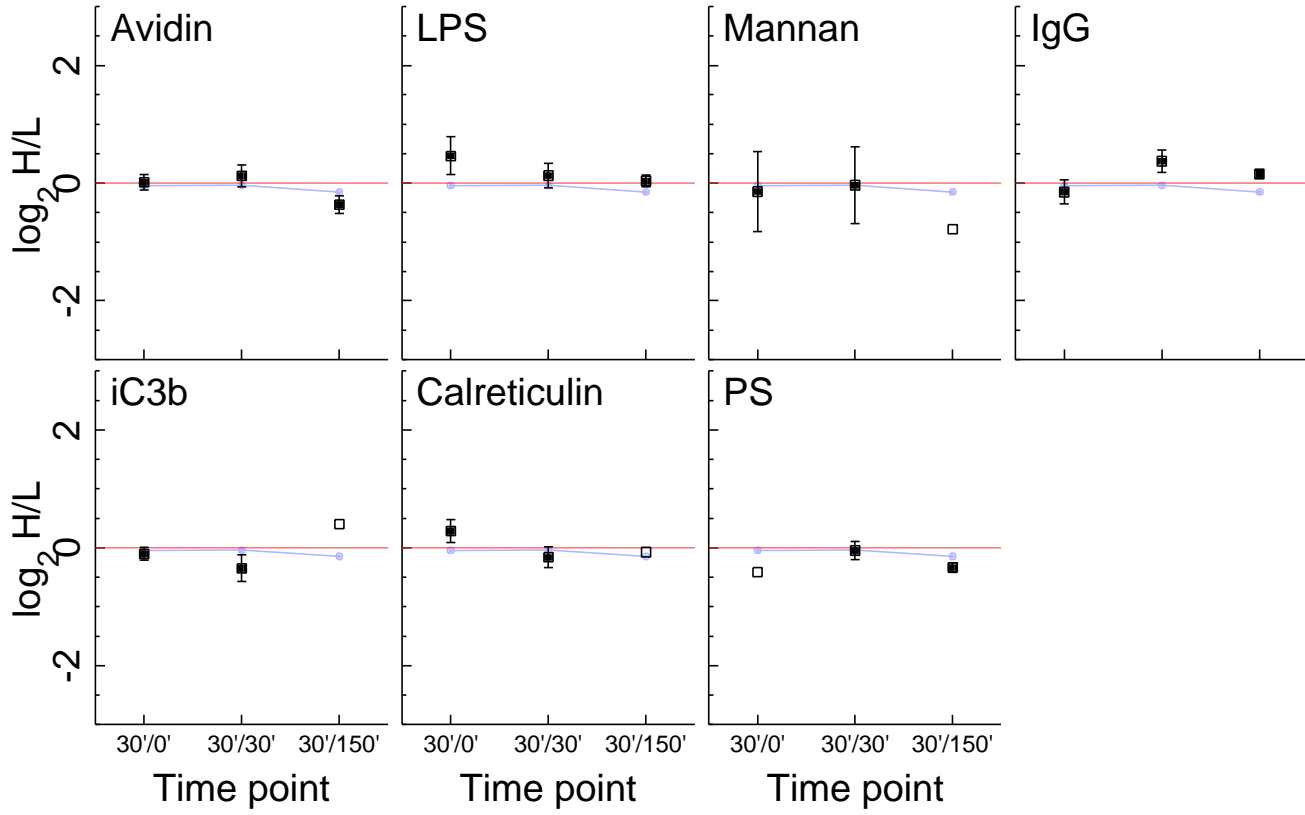

ppp1ca (P62137)

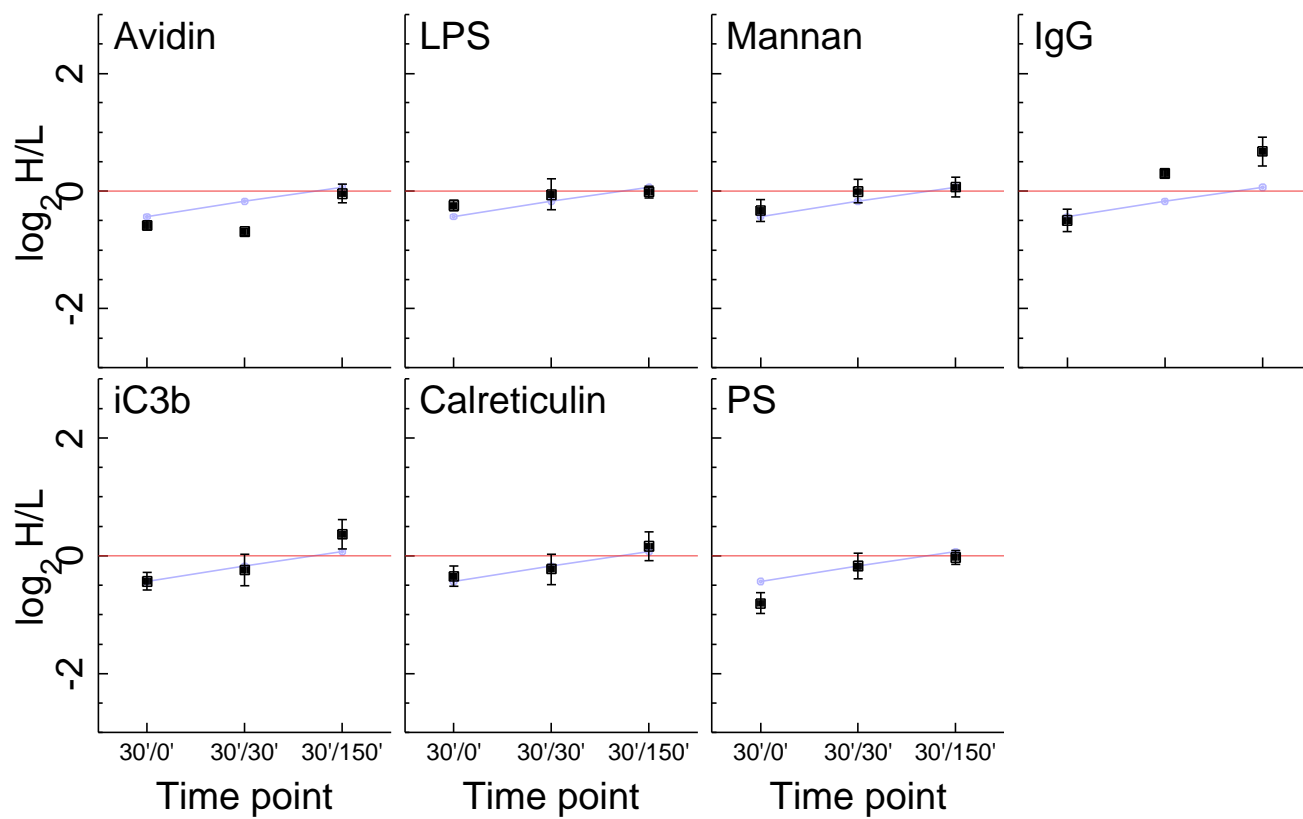

ppp1cb (P62141)

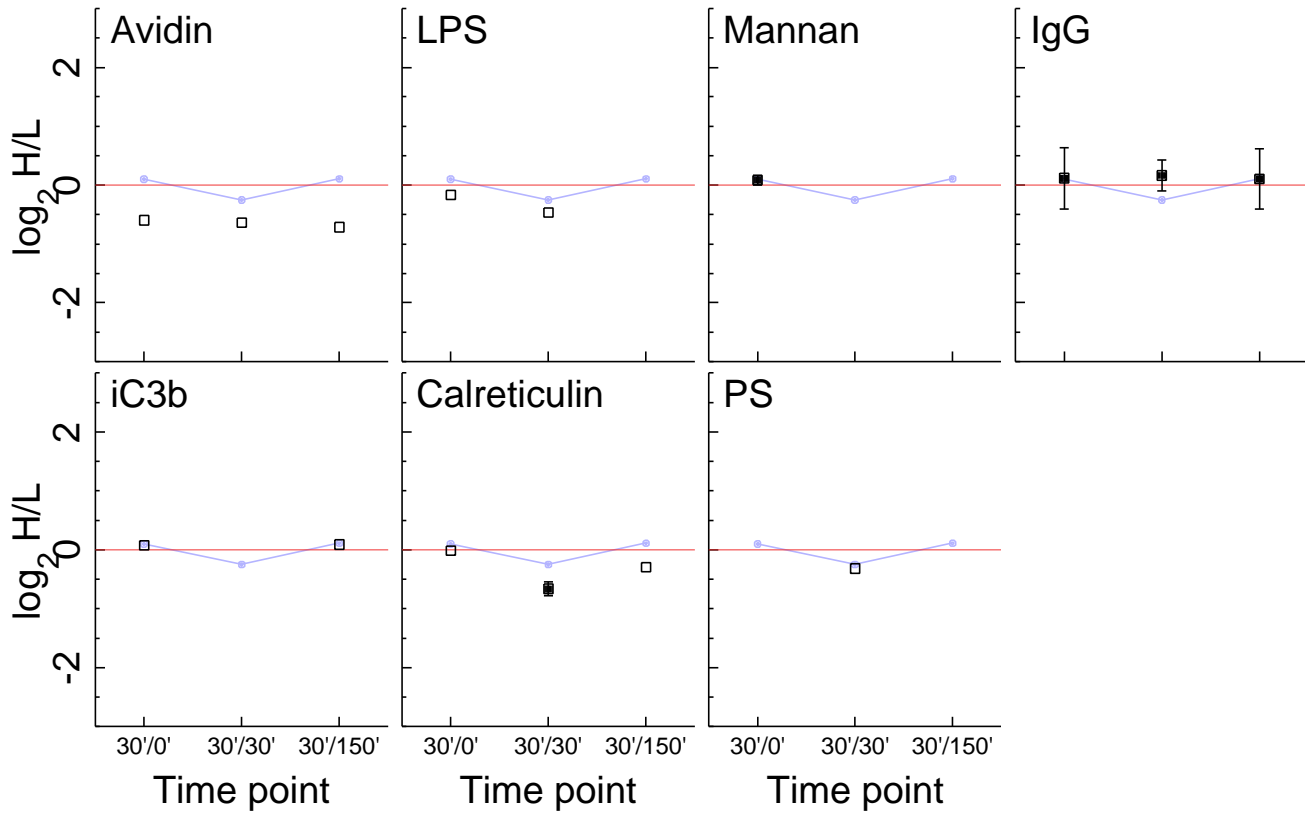

ppp1cc (P63087)

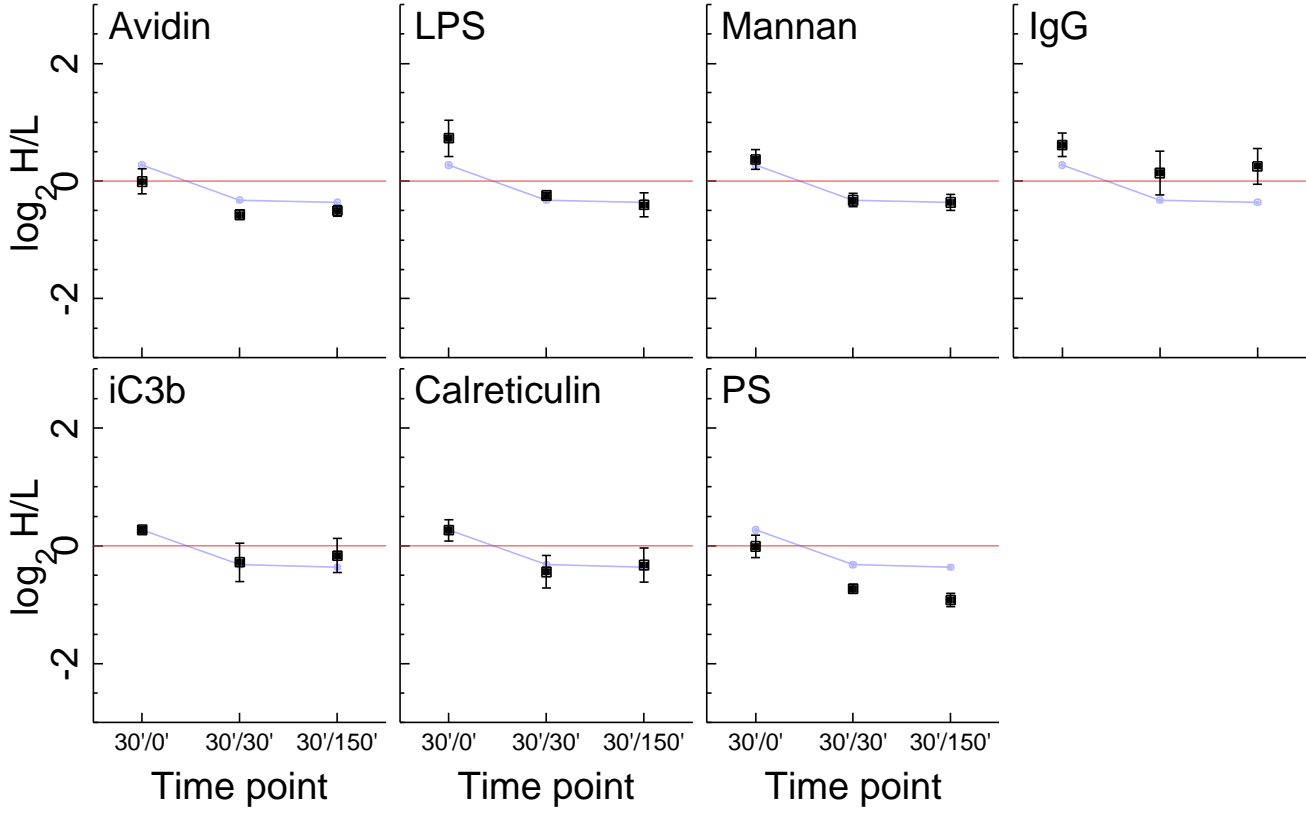



ppp1r12a (Q9DBR7)

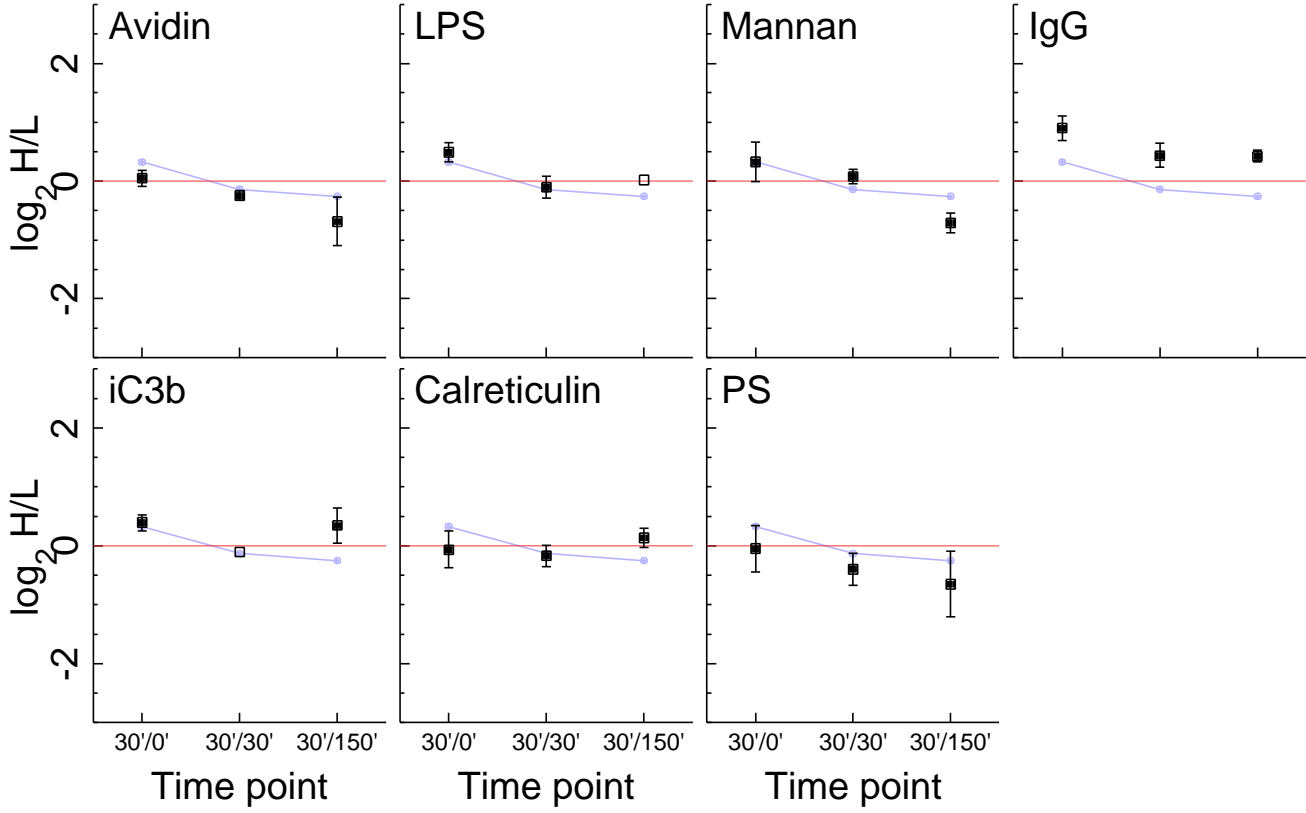

ppp1r12c (Q3UMT1)

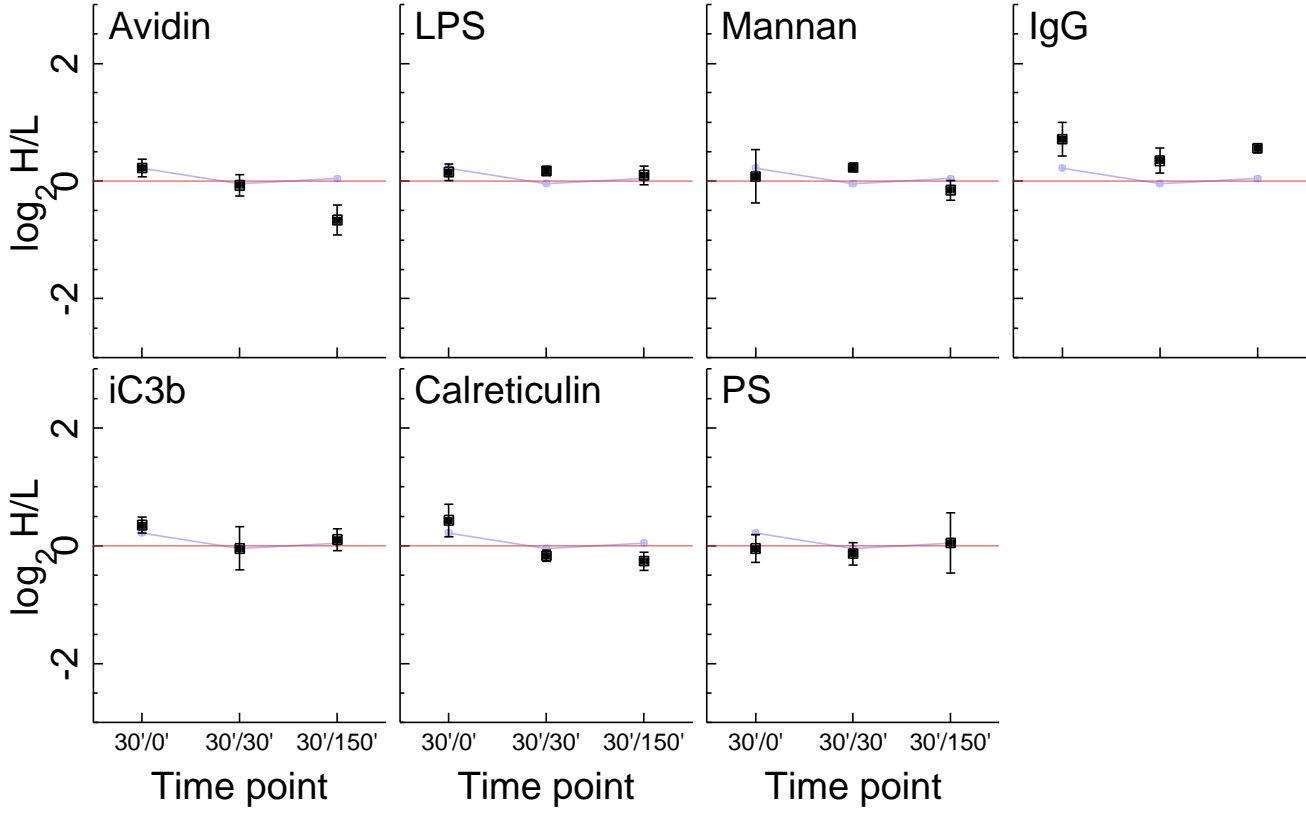

ppp1r18 (Q8BQ30)

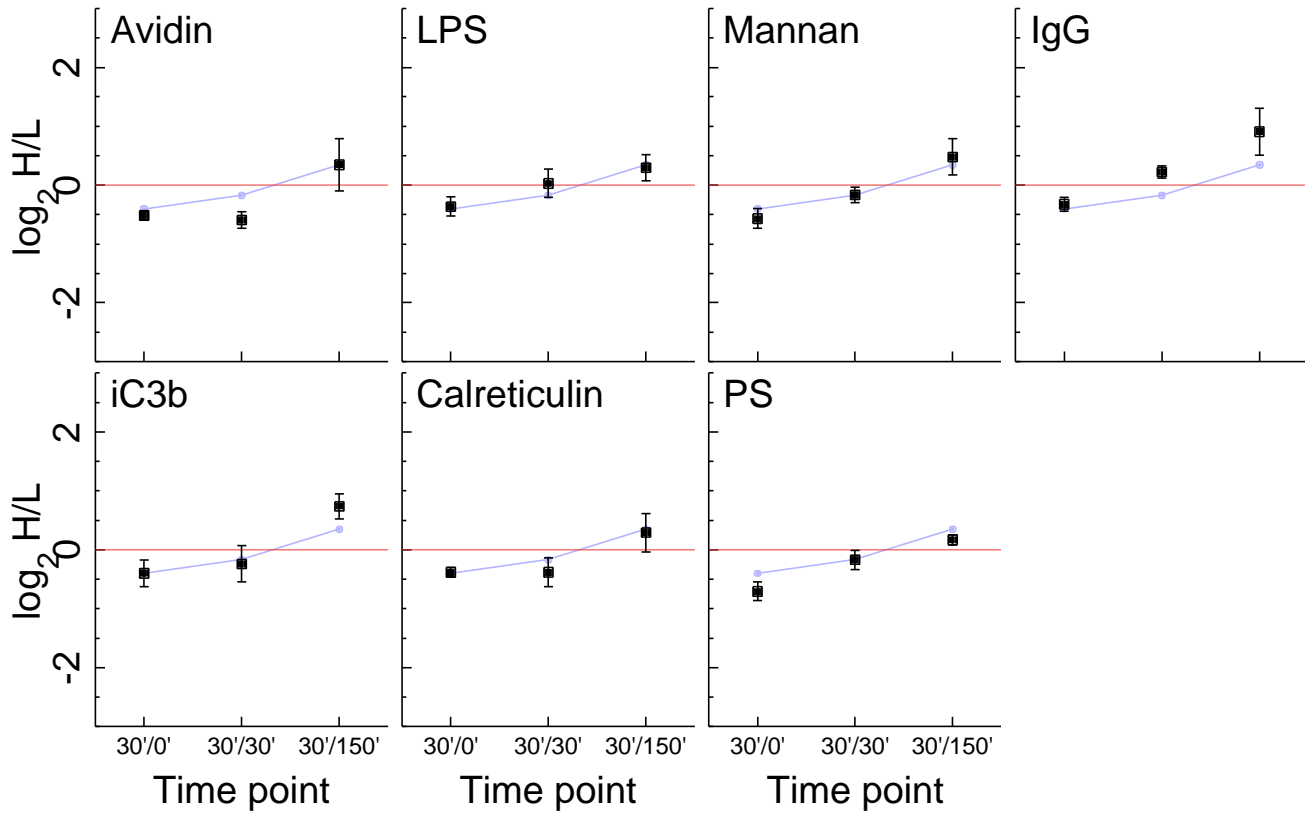

ppp2ca (P63330)

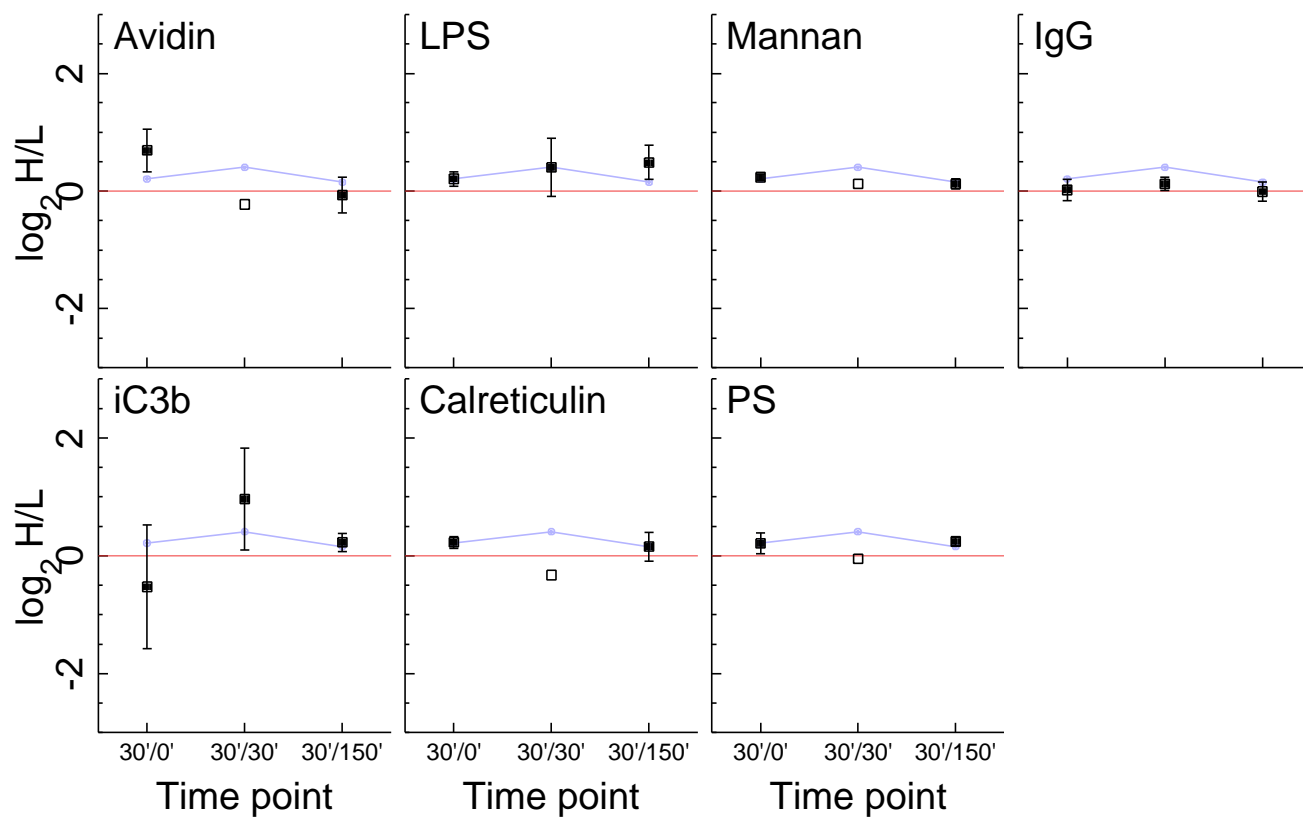

ppp2r1a (Q76MZ3)

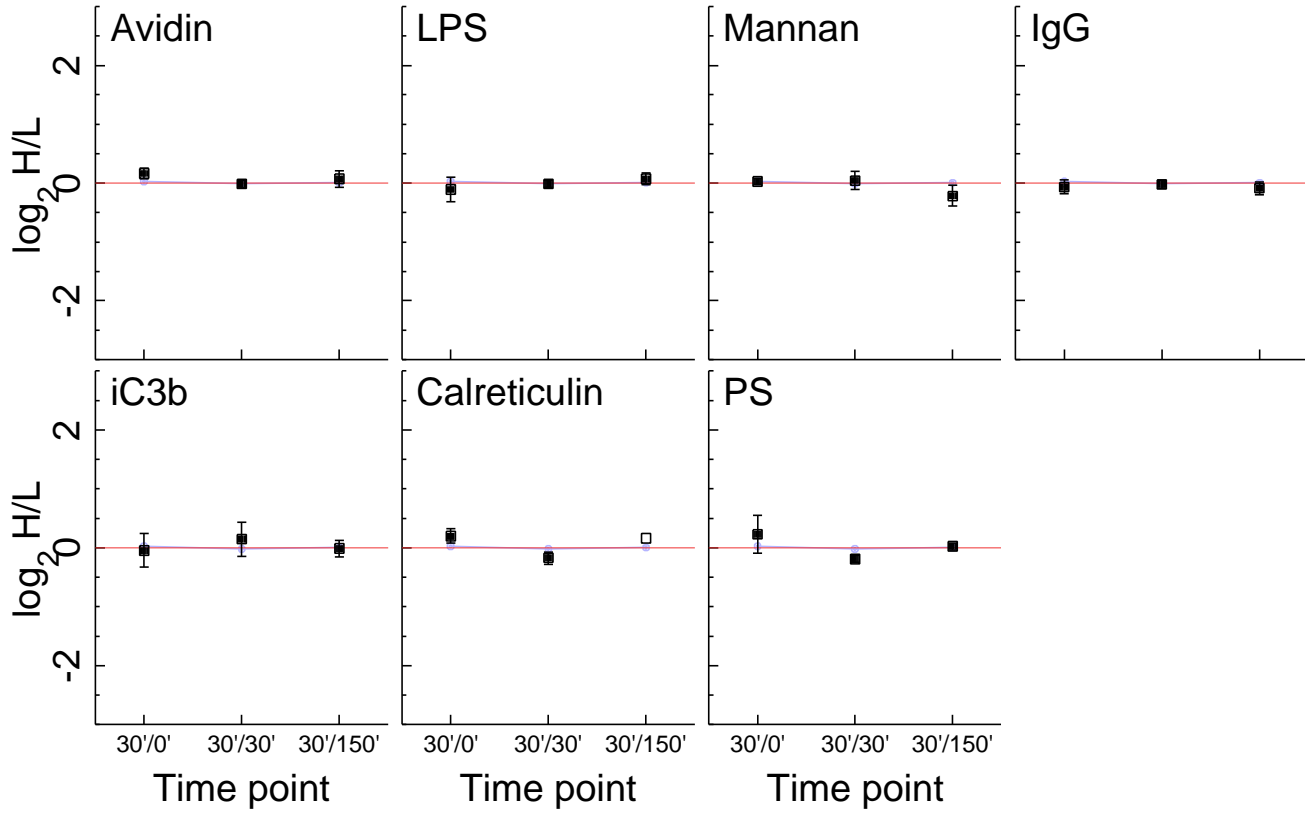

ppt1 (O88531)

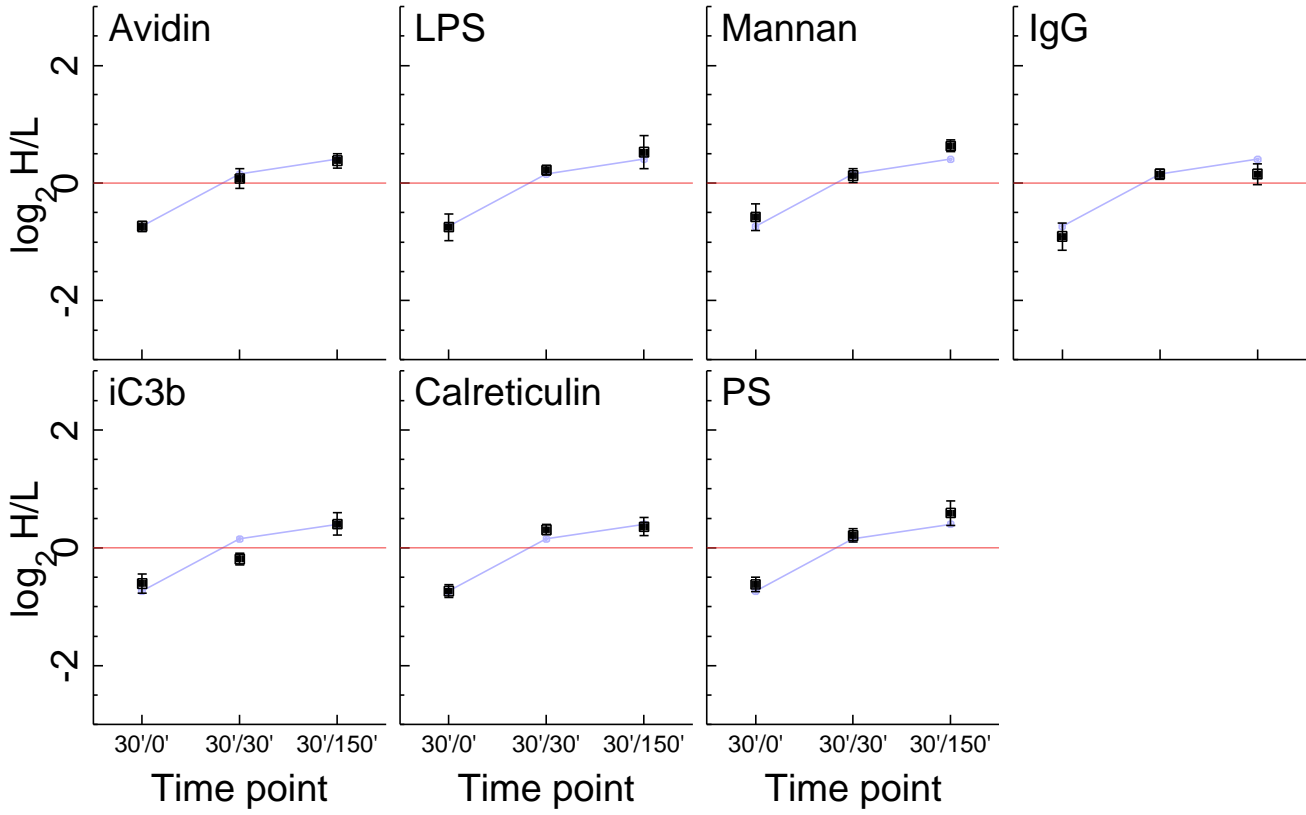

ppt2 (O35448)

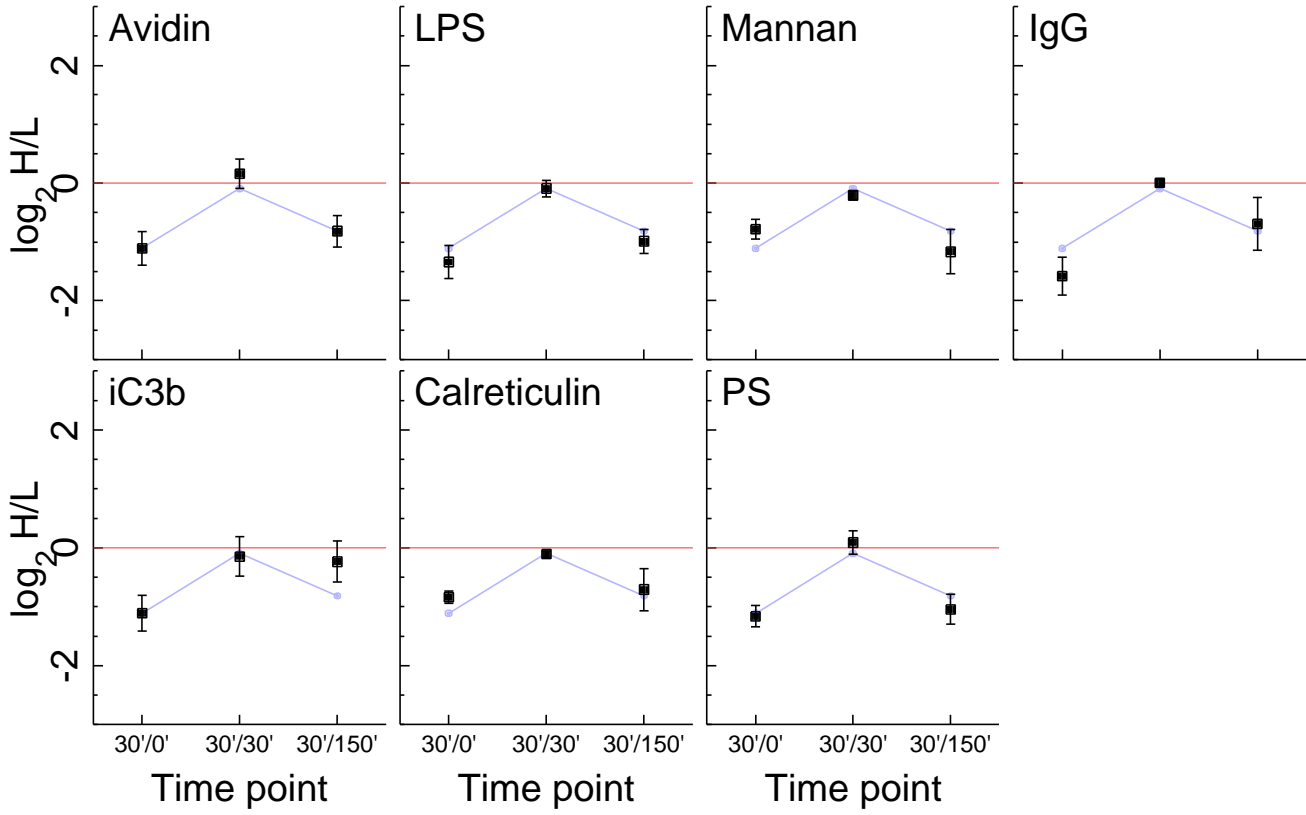

pqbp1 (Q91VJ5)

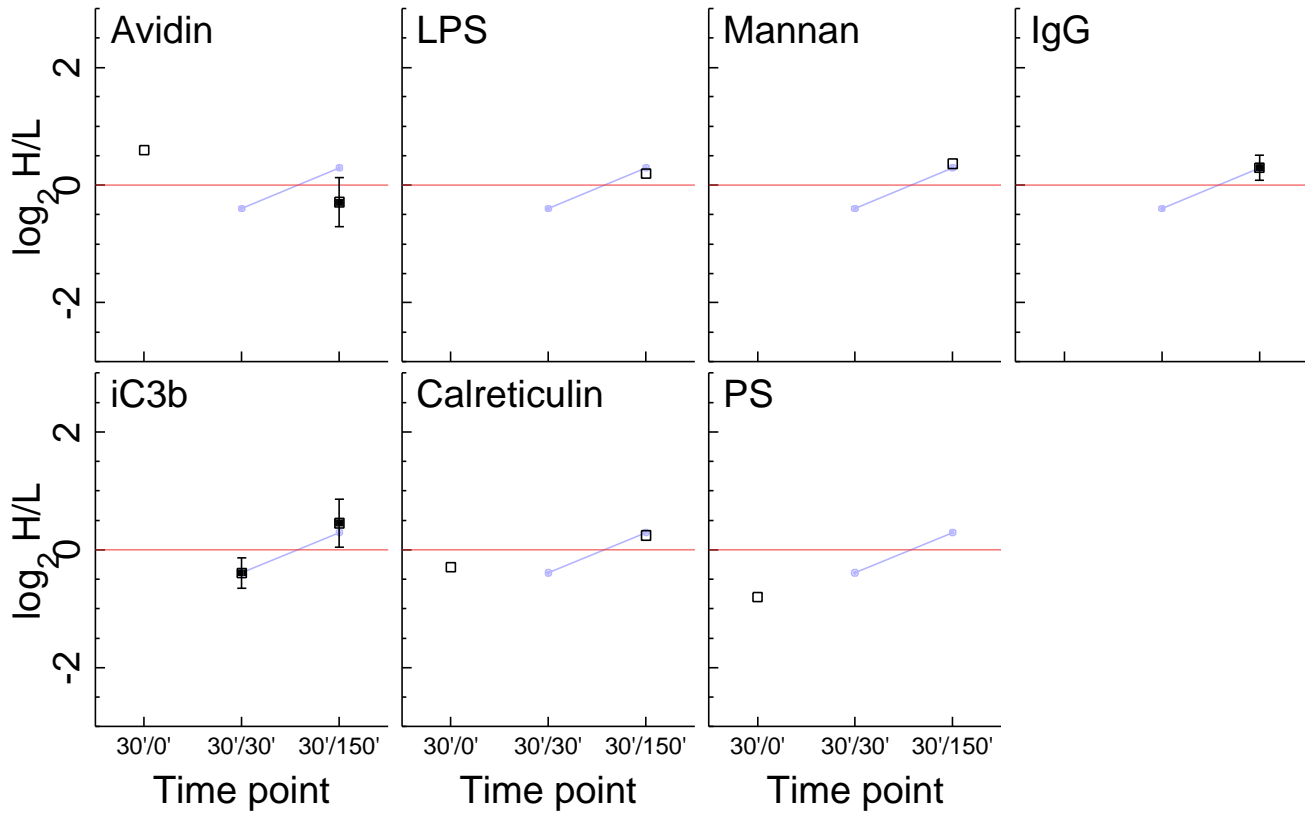



pqlc2 (Q8C4N4)

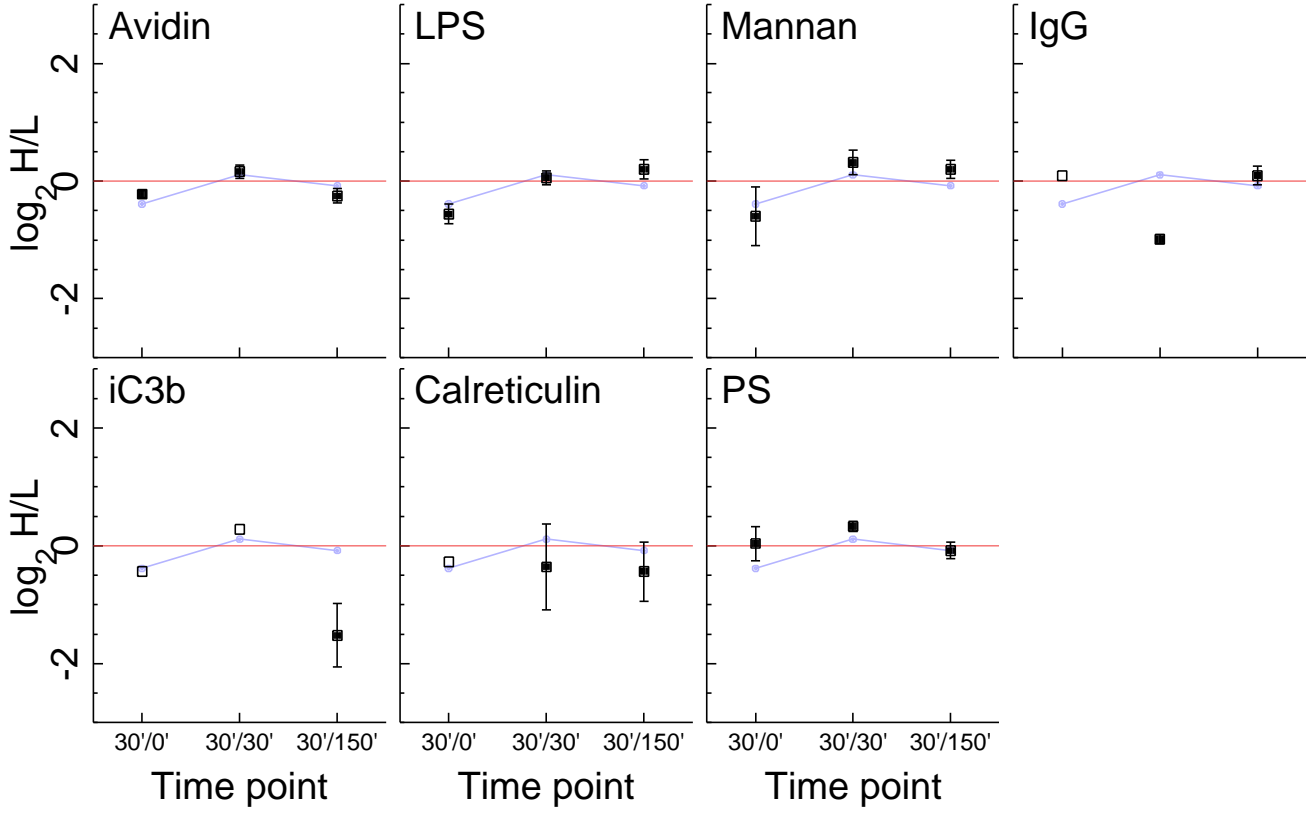

prcc (Q9EQC8)

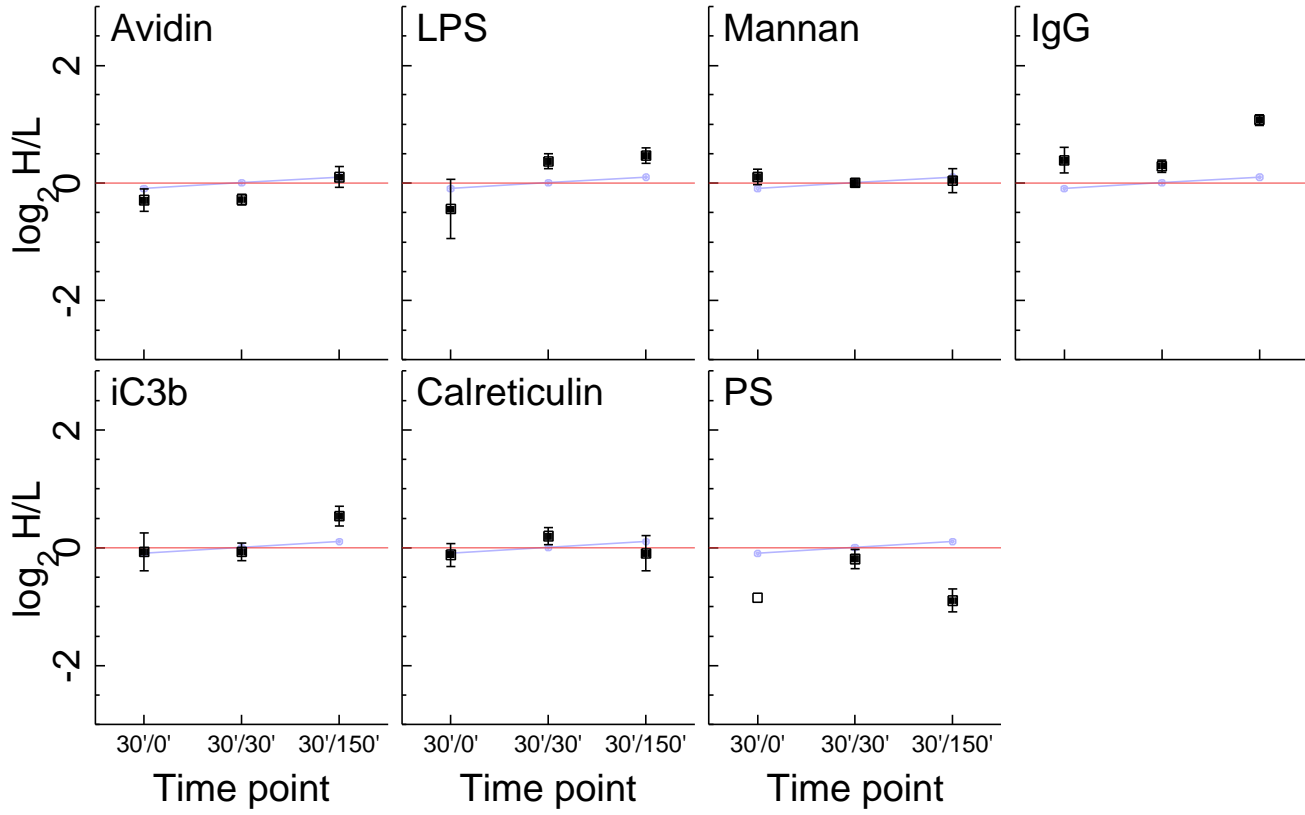

prcp (Q7TMR0)

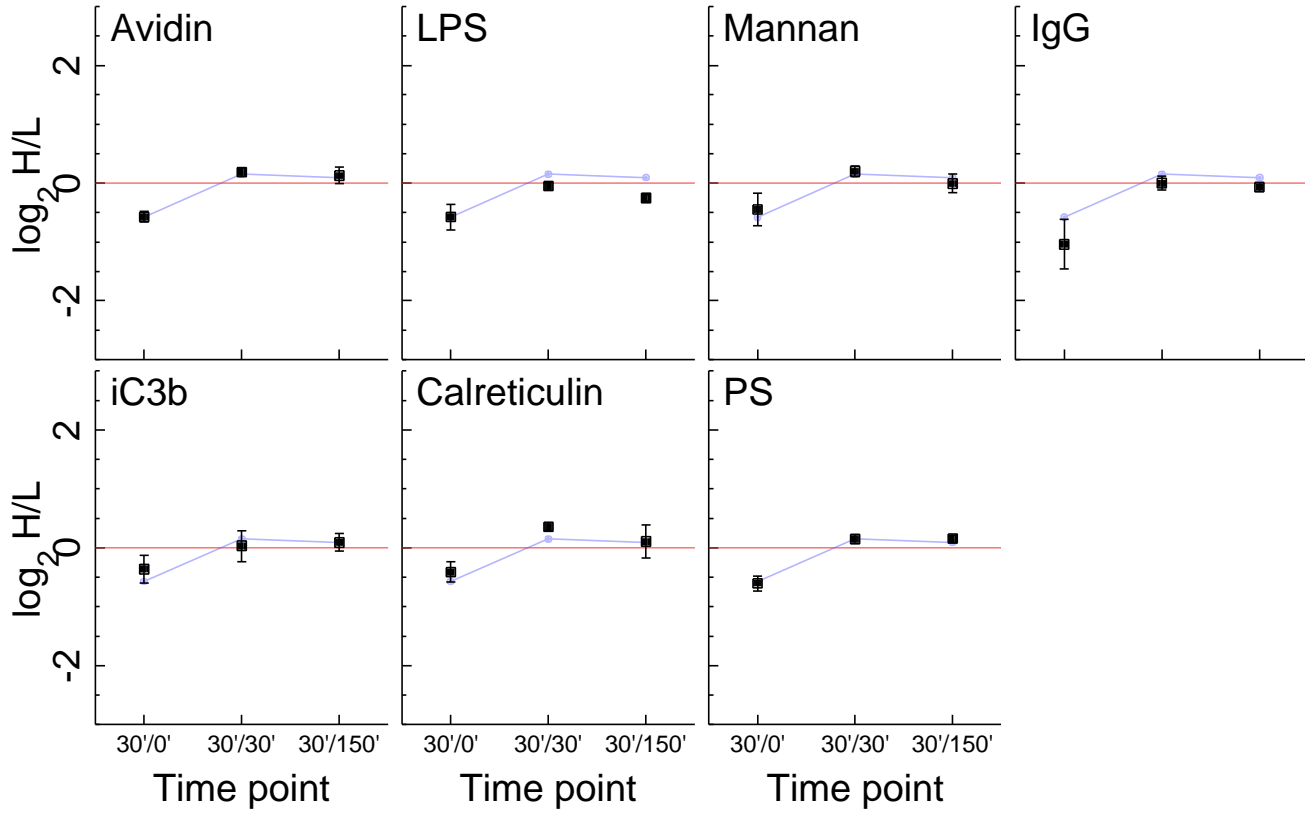

prdx1 (P35700)

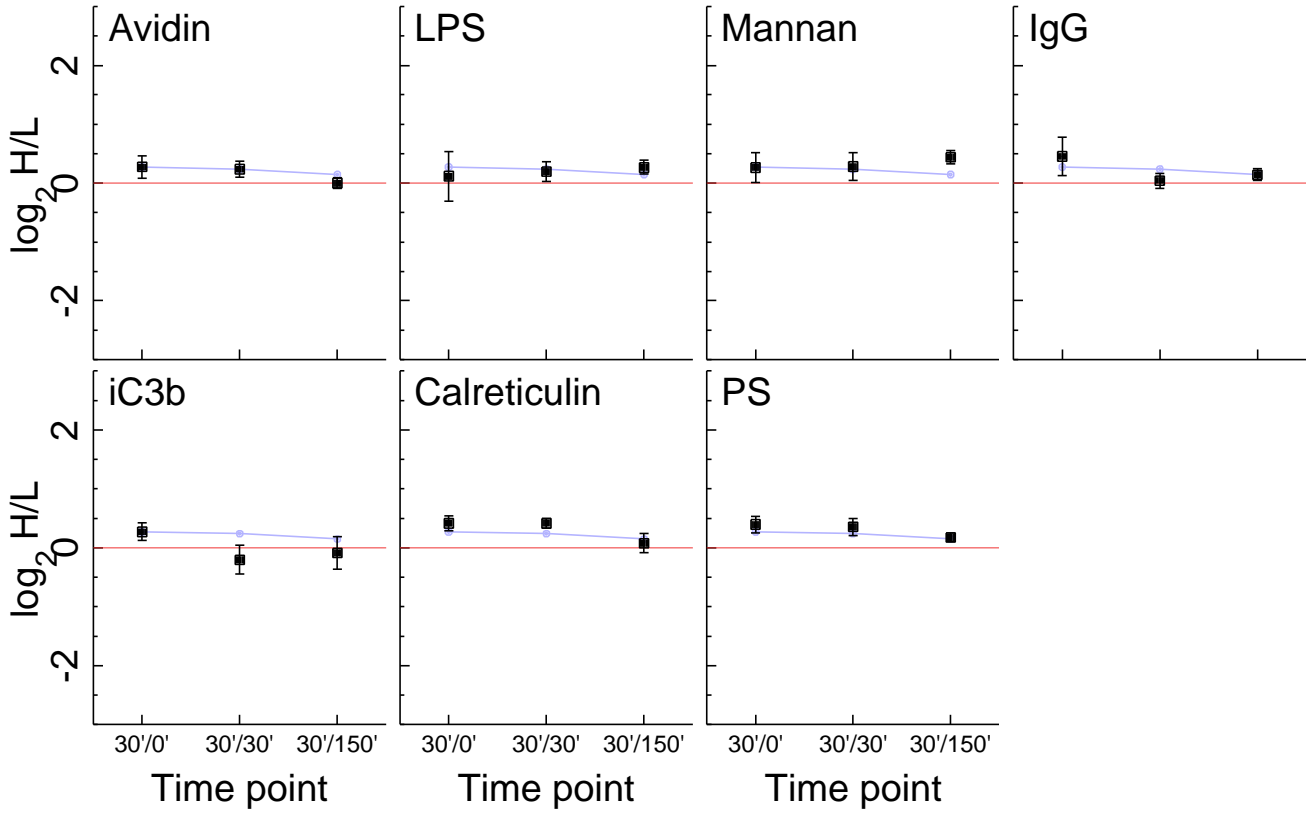

prdx2 (Q61171)

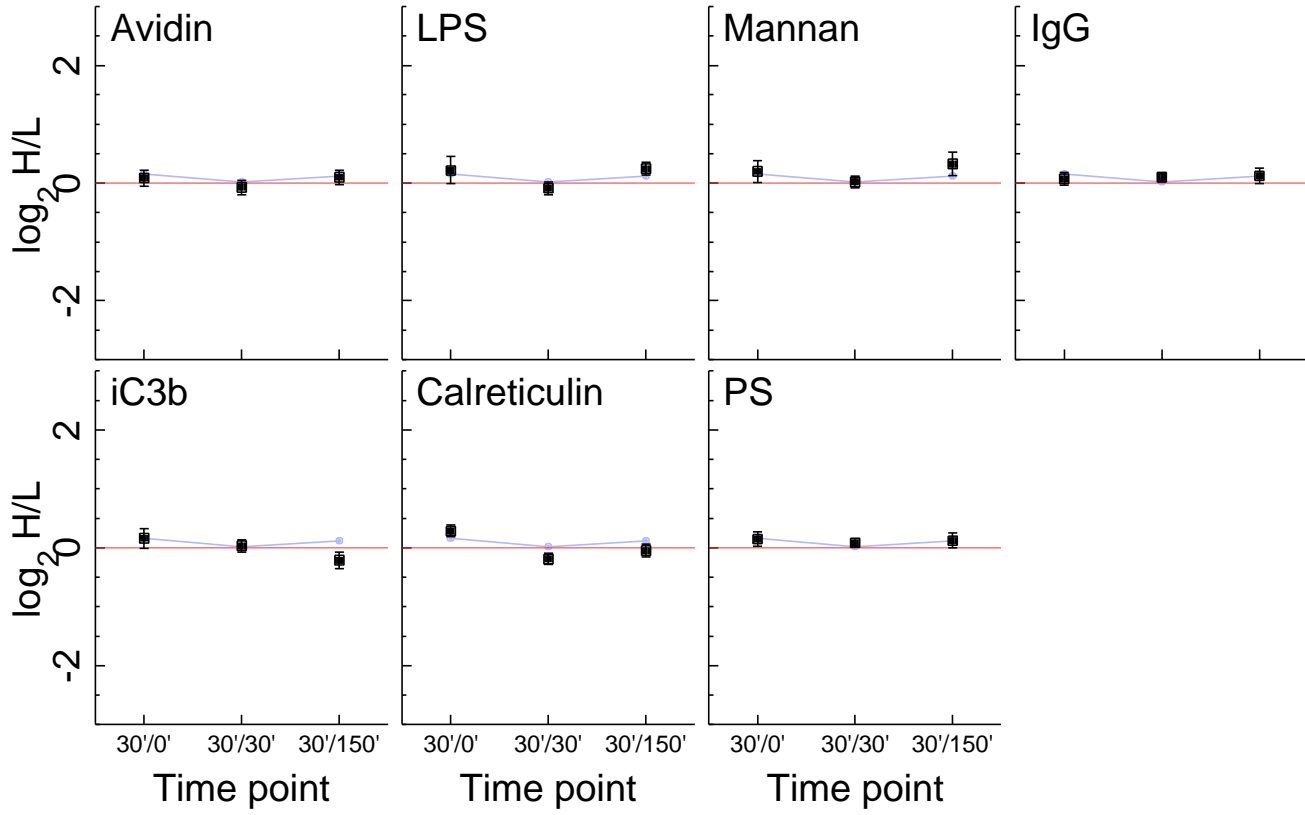

prdx3 (P20108)

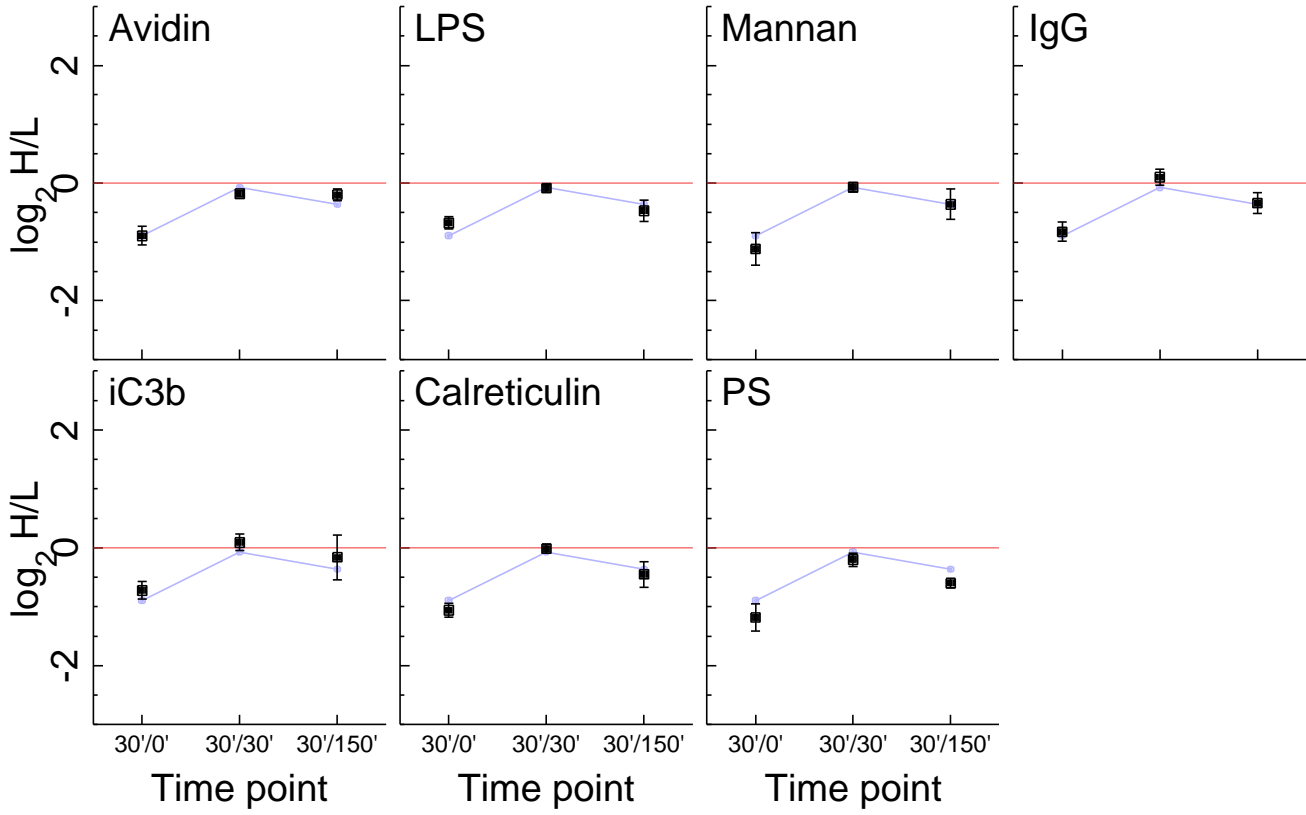

prdx4 (O08807)

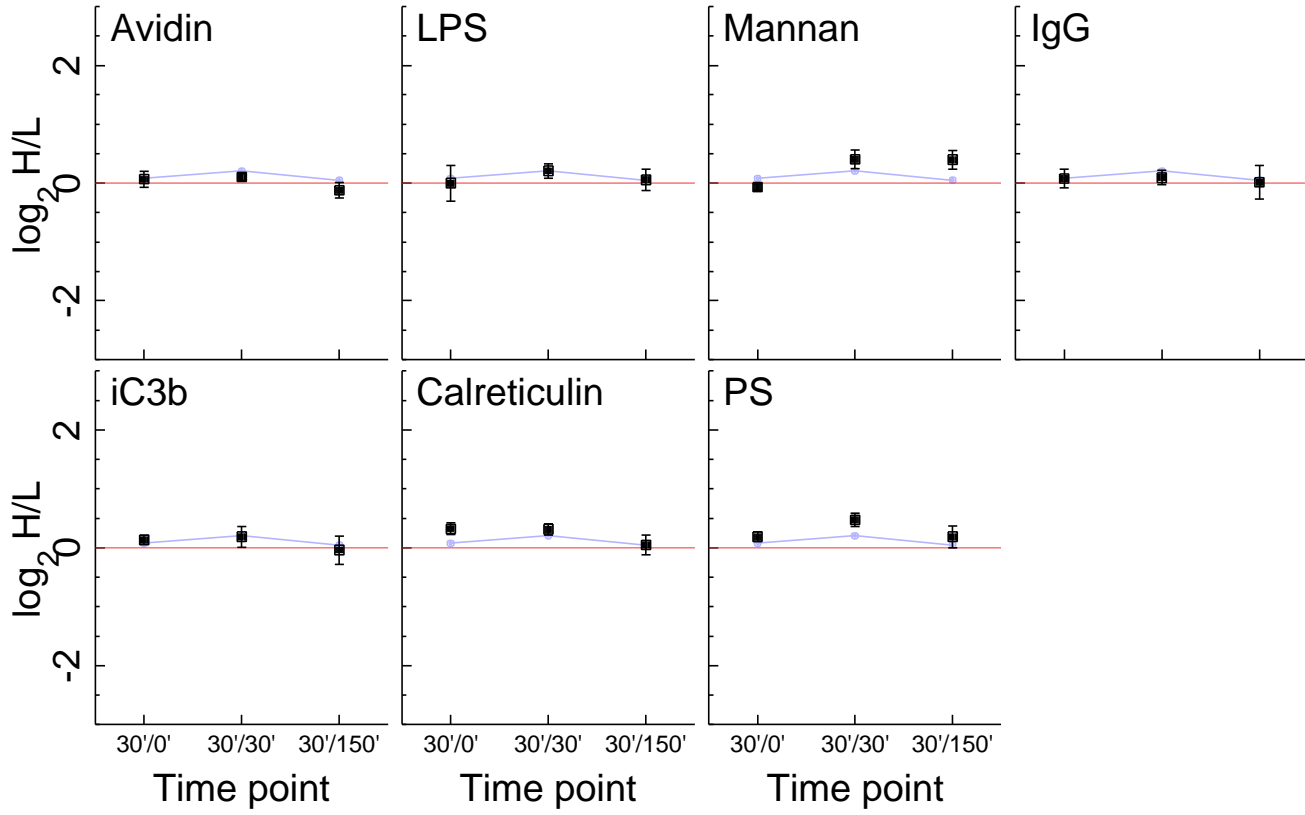

prdx5 (H3BJQ7)

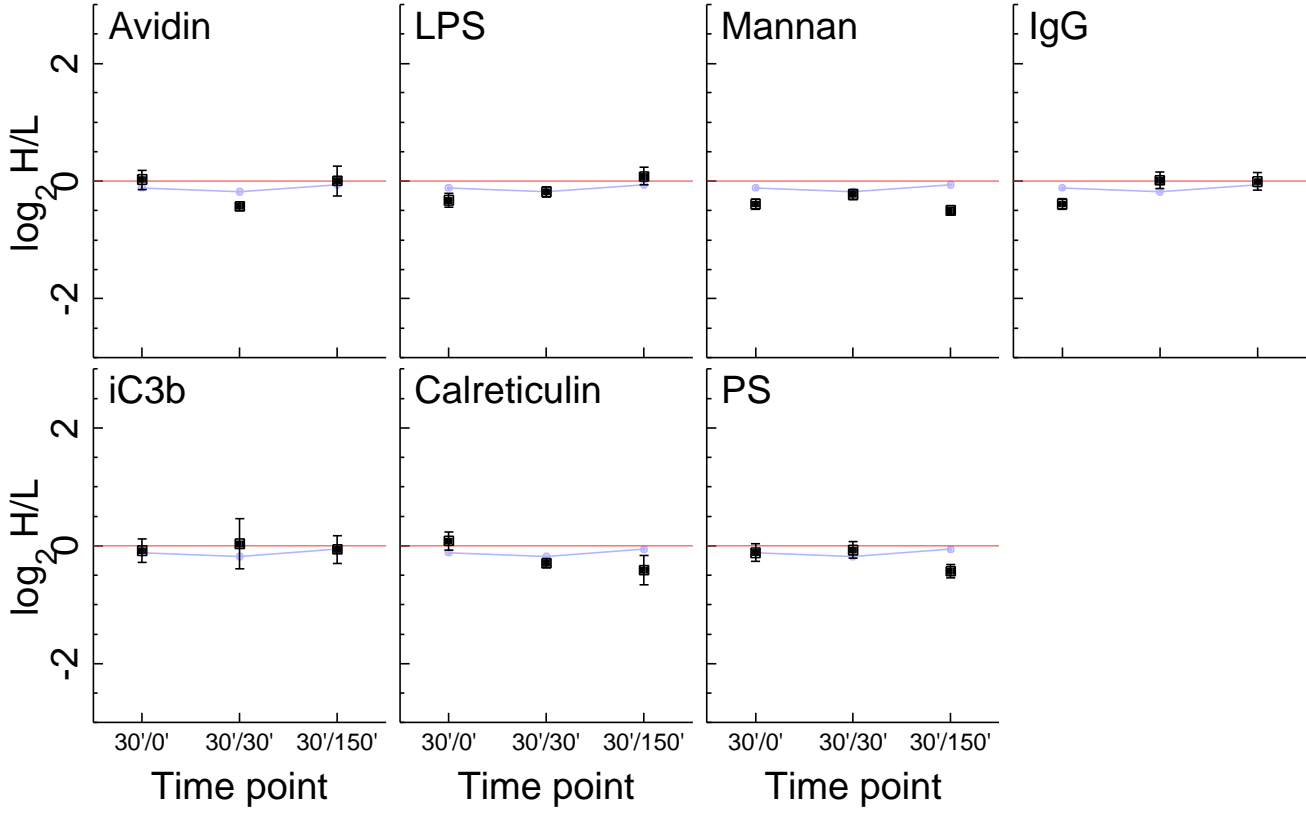



prkacb (P68181)

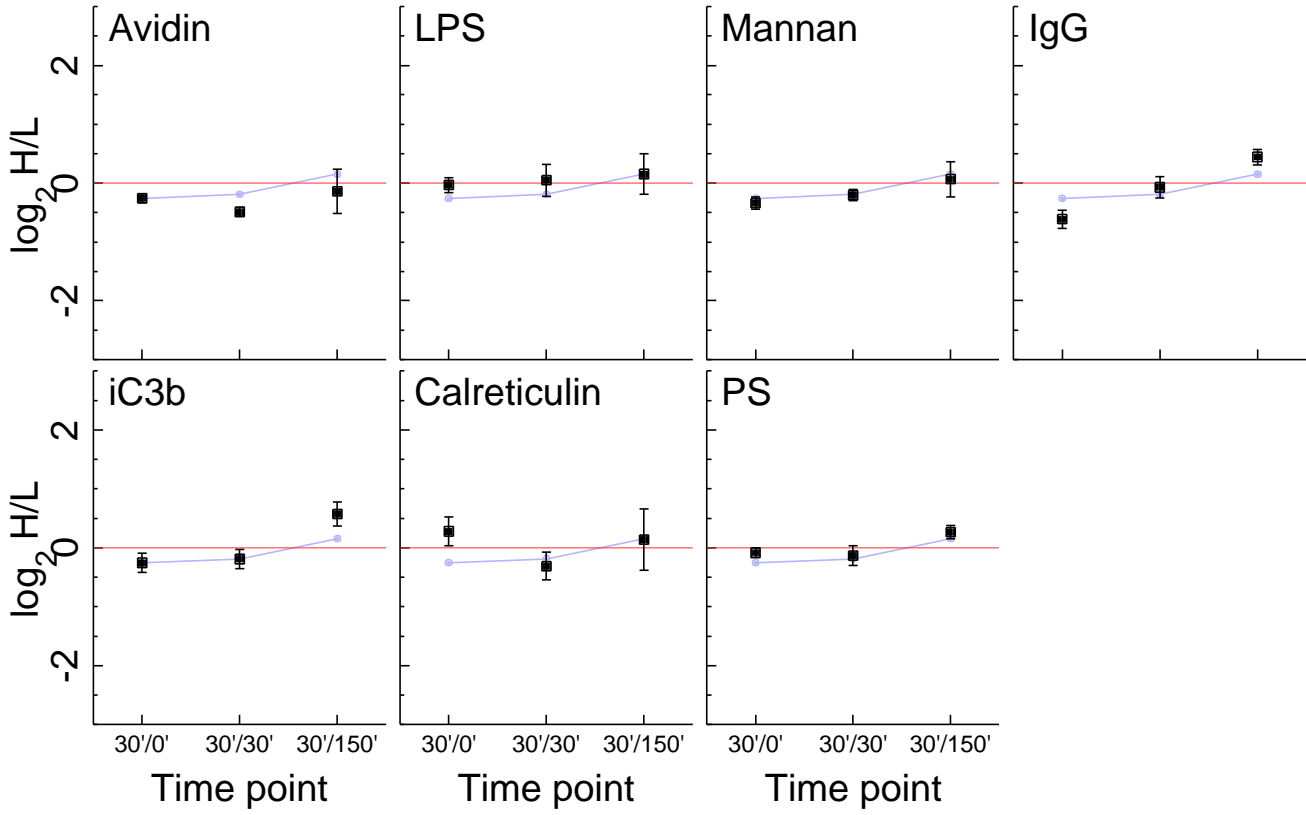

### prkar1a (Q9DBC7)

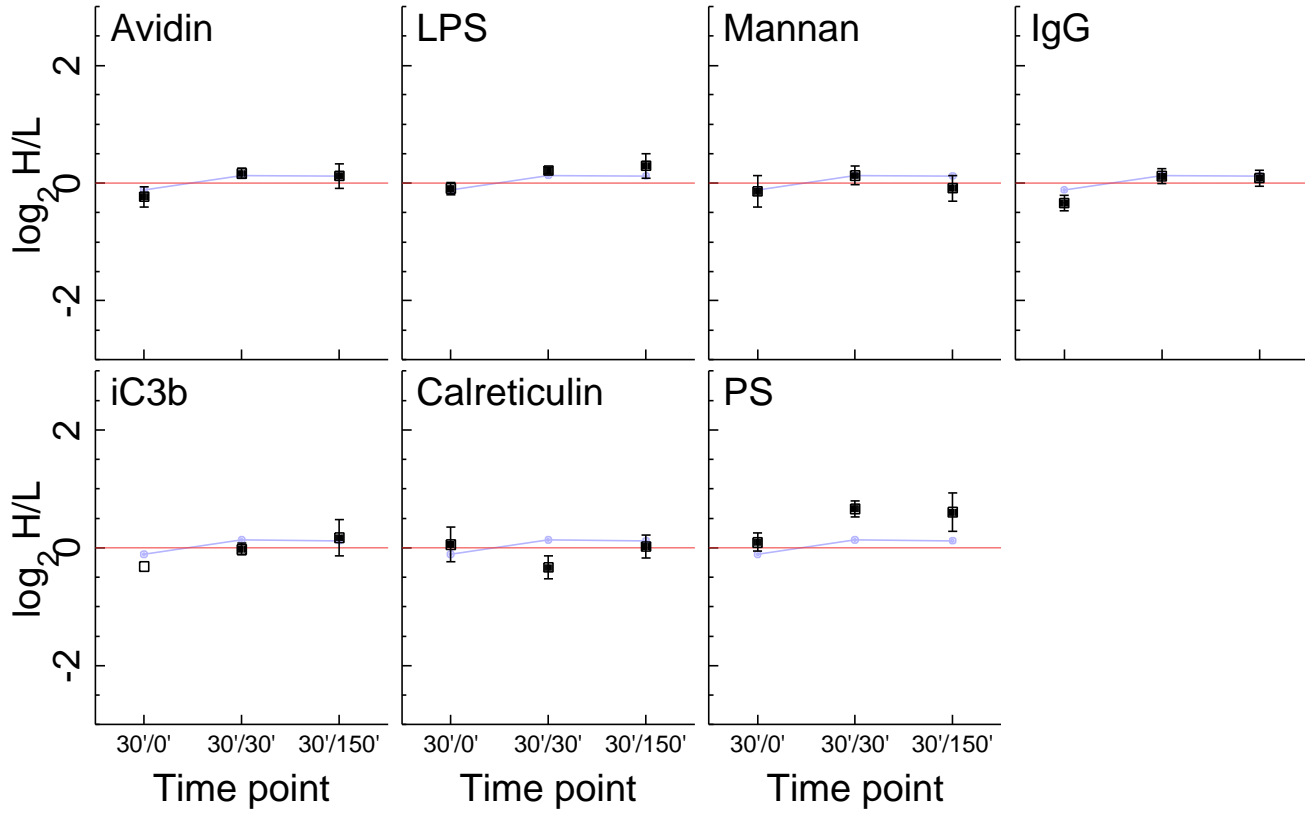

prkca (P20444)

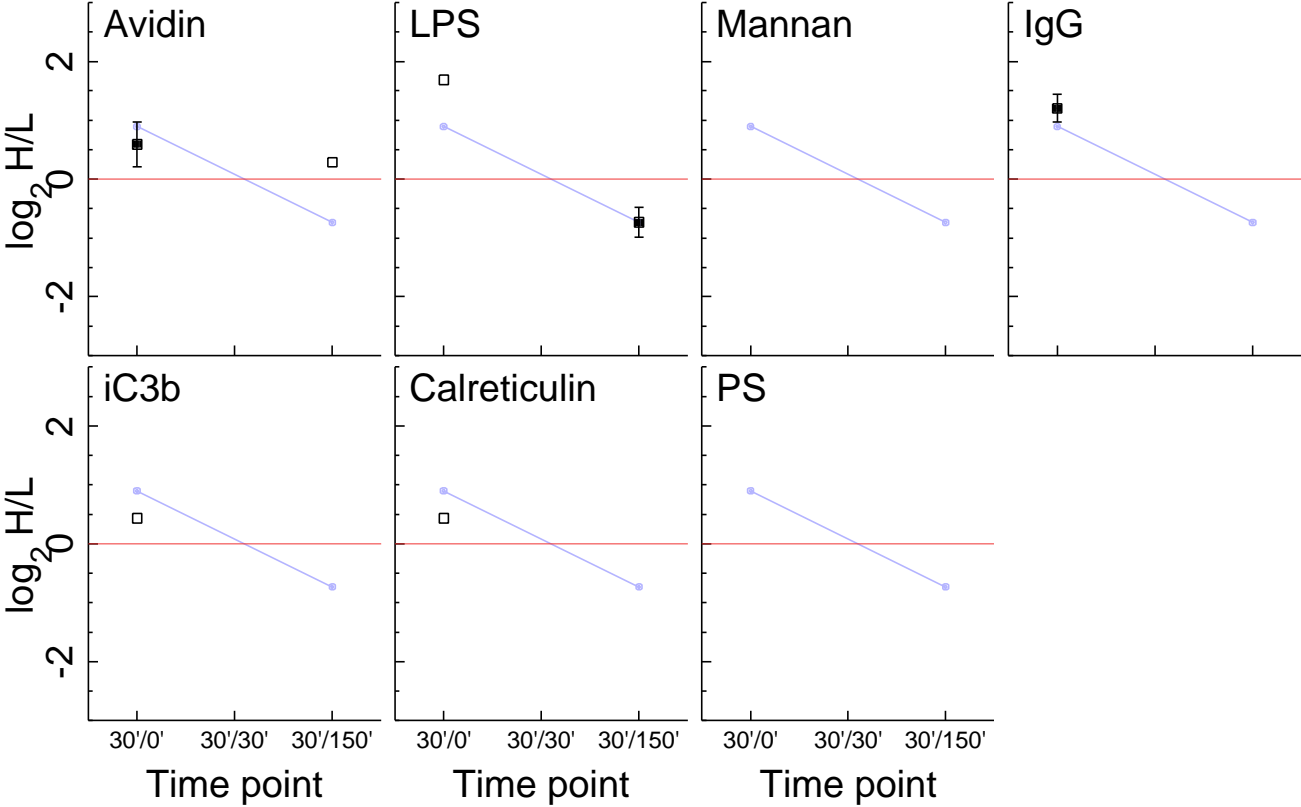

prkcd (P28867)

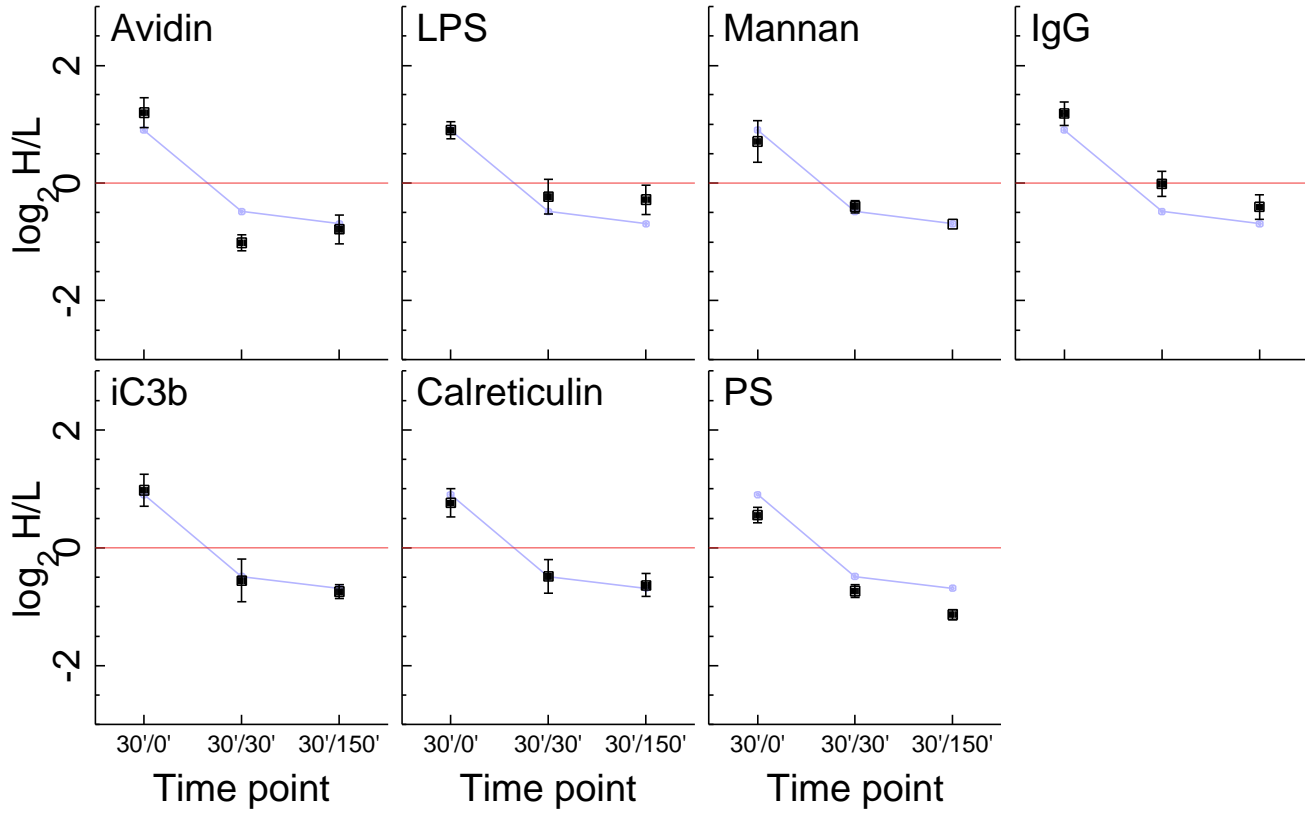

prkcsh (O08795)

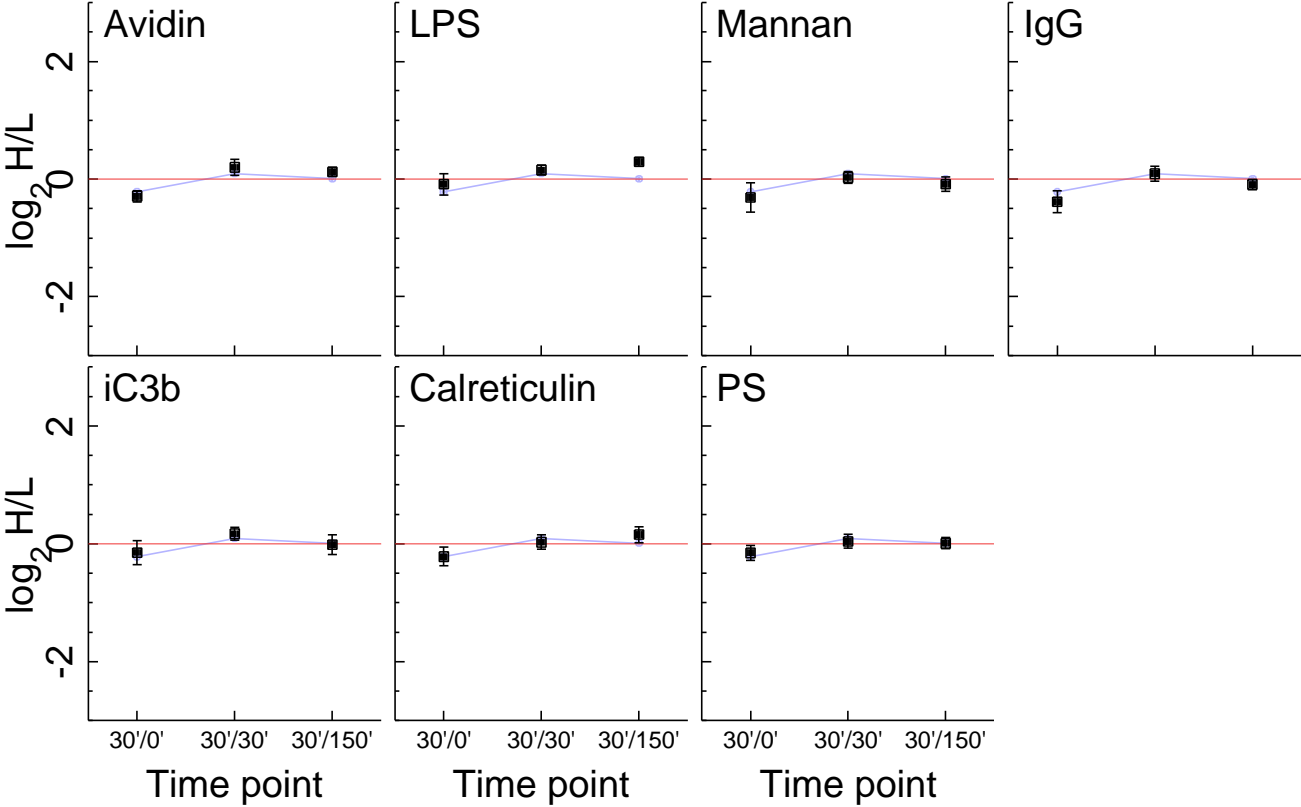

prpf19 (J3QNL8)

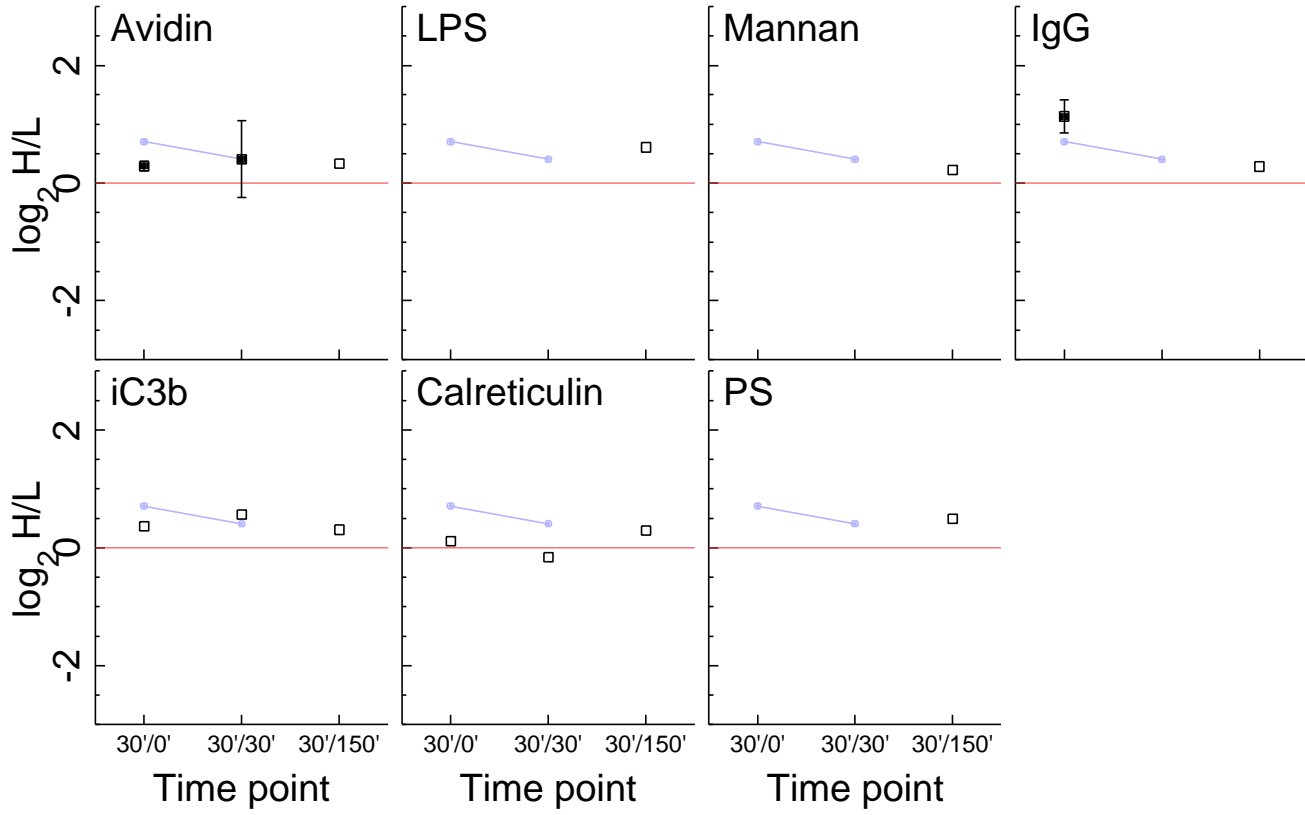

prpf31 (Q8CCF0)

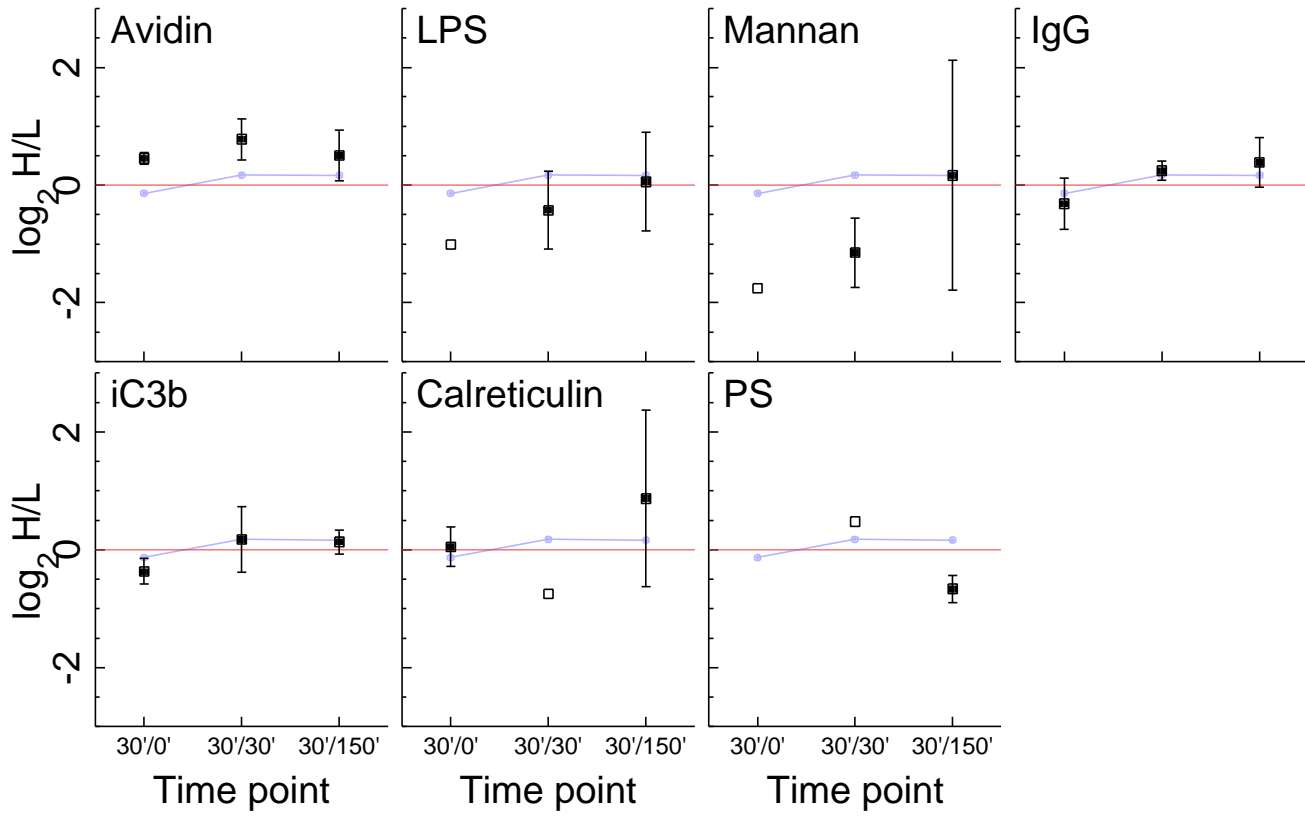

prpf40a (Q9R1C7)

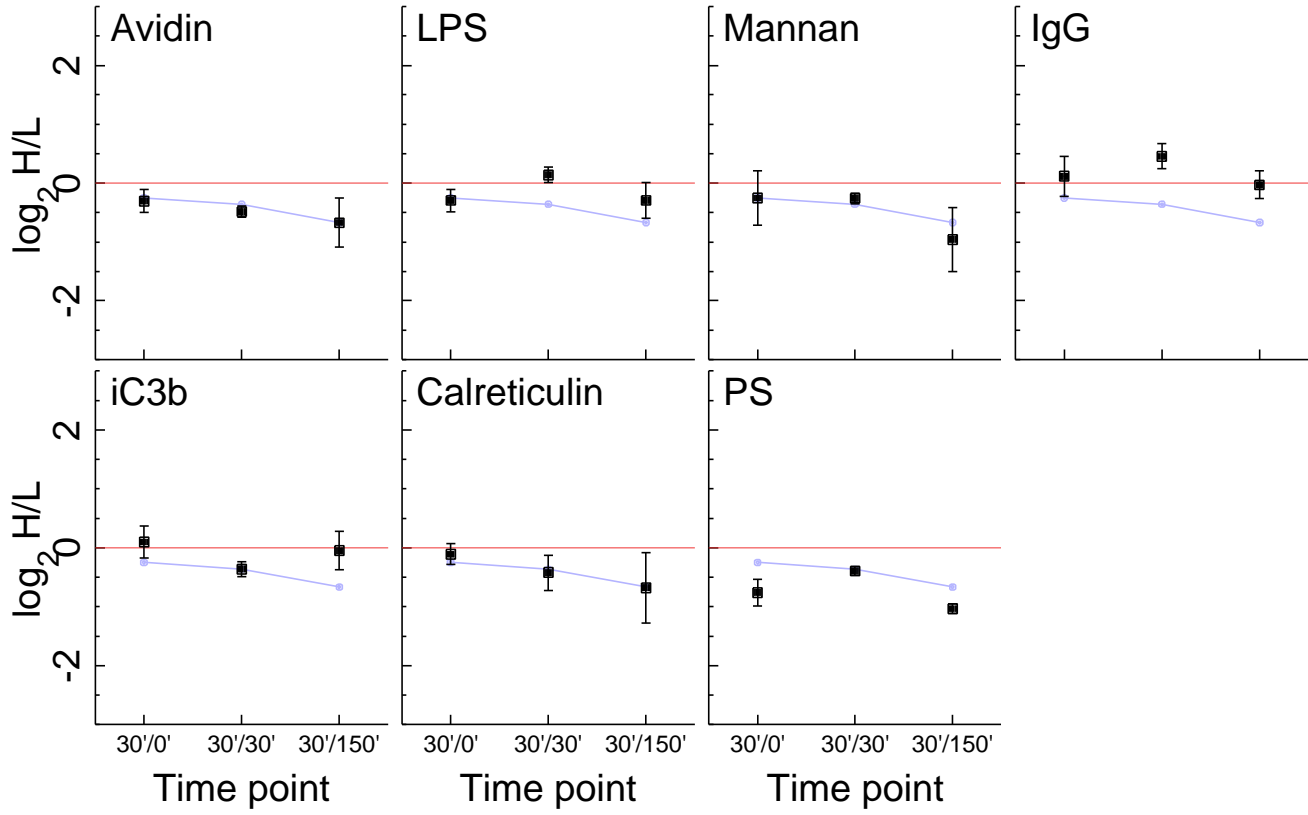



prrc2c (E9QKG5)

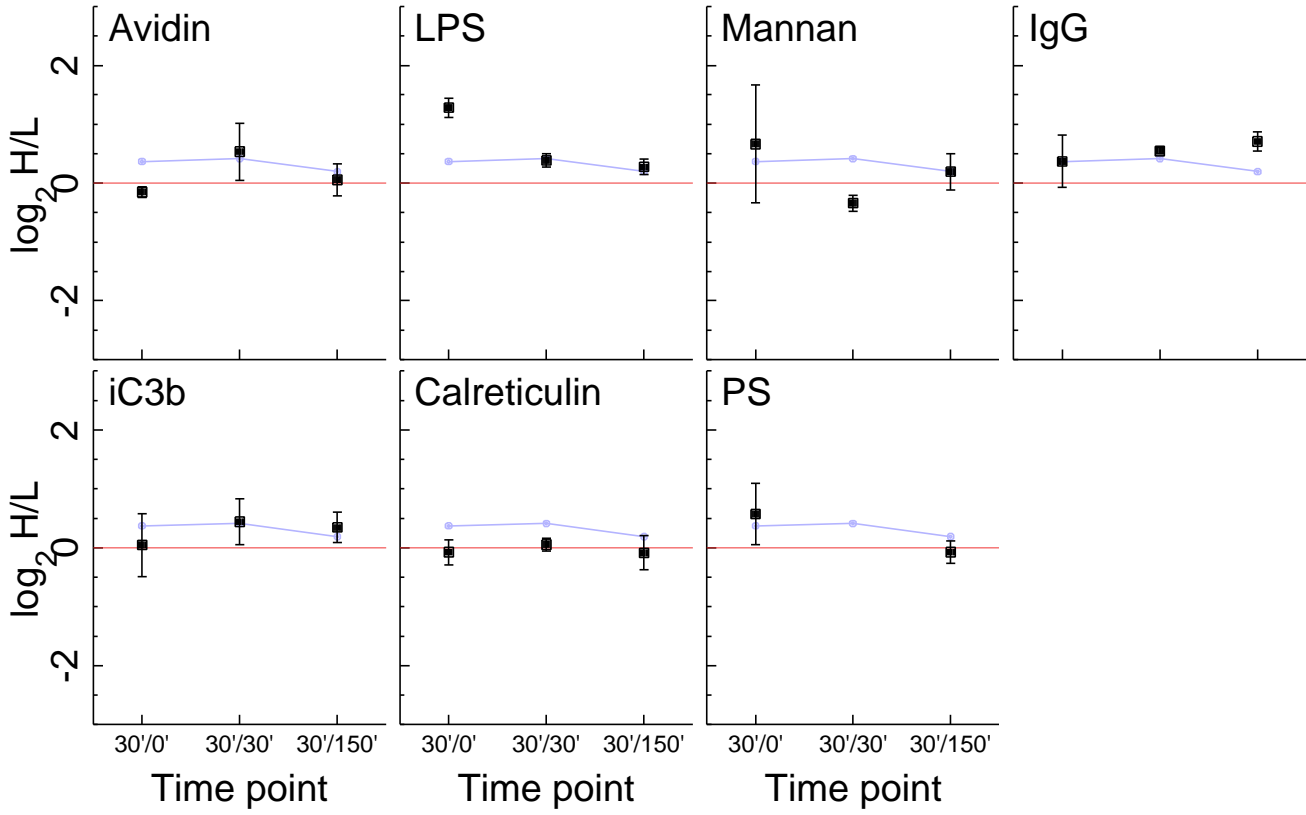

prss1 (Q9Z1R9)

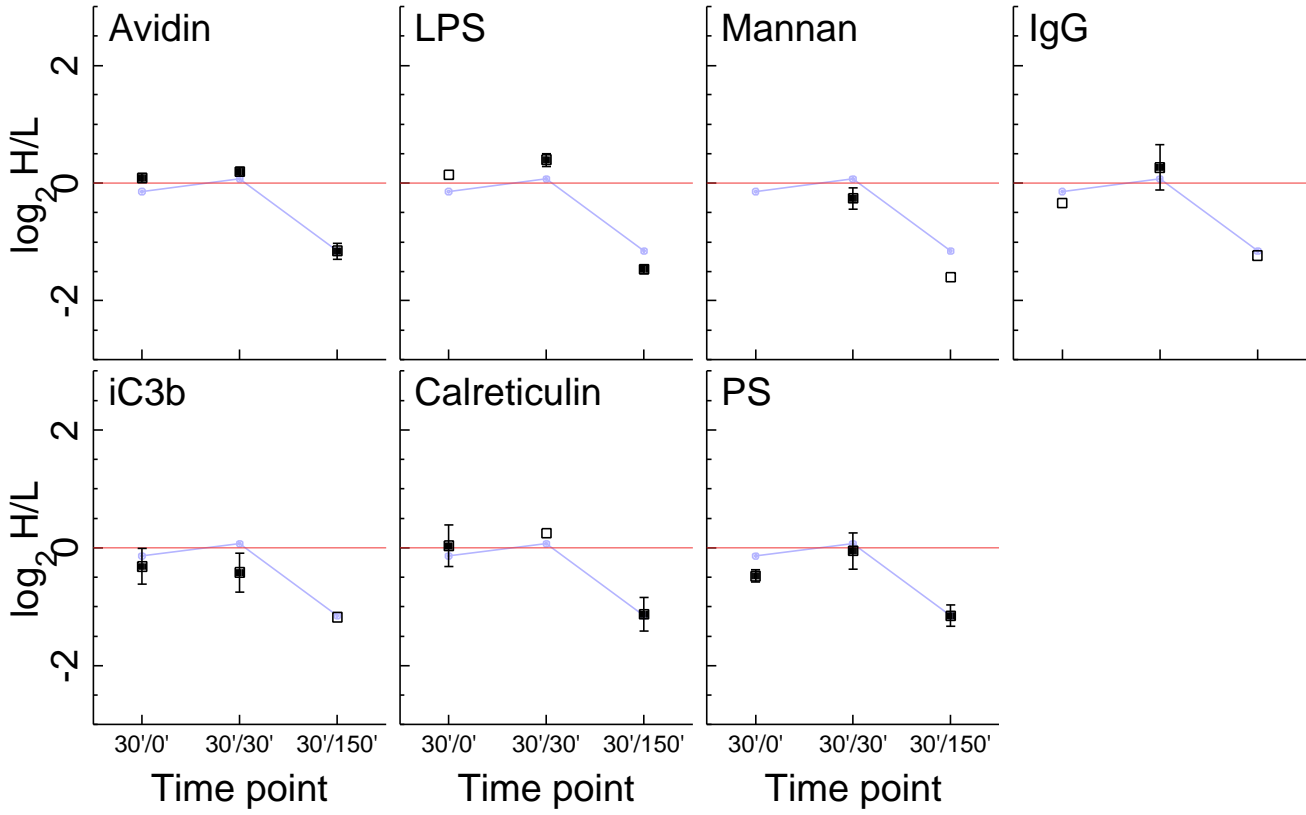

psap (Q8BFQ1)

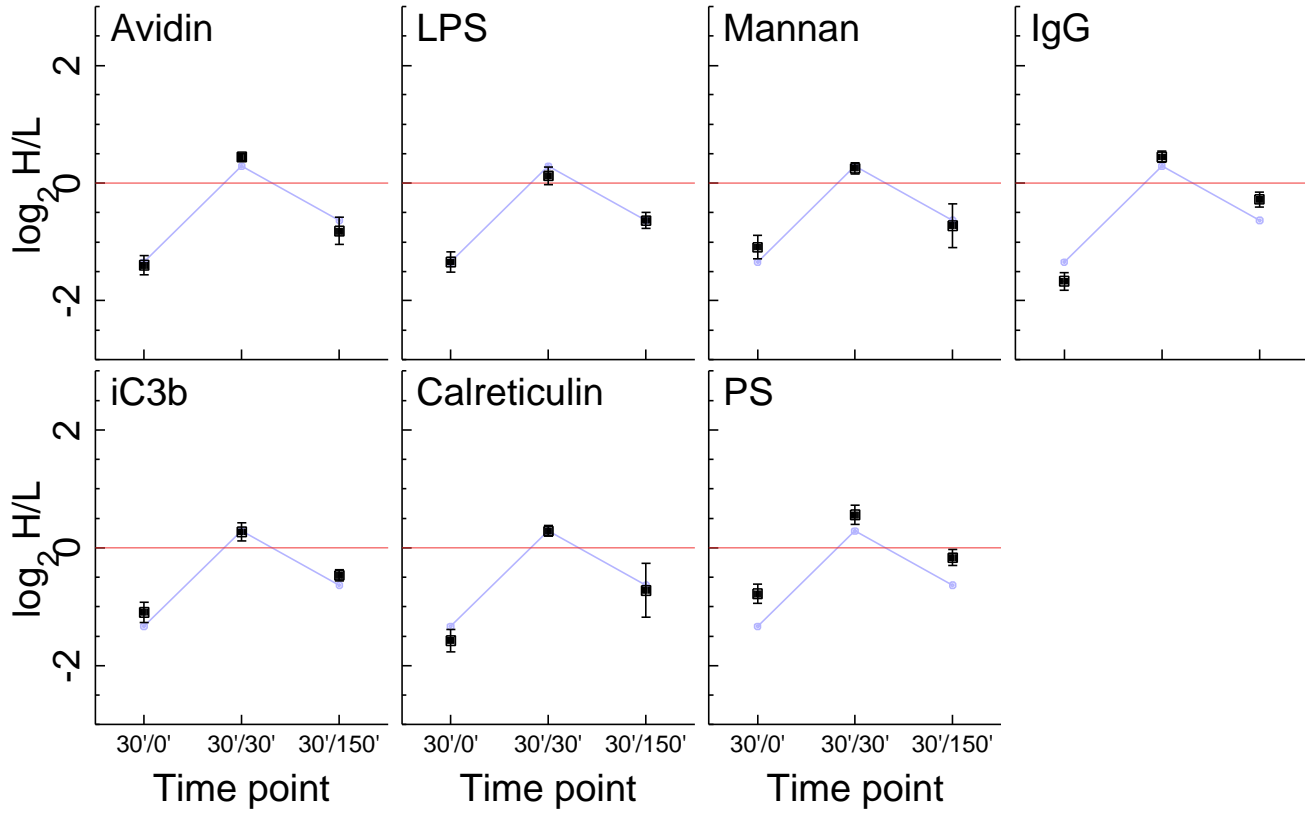

psen1 (P49769)

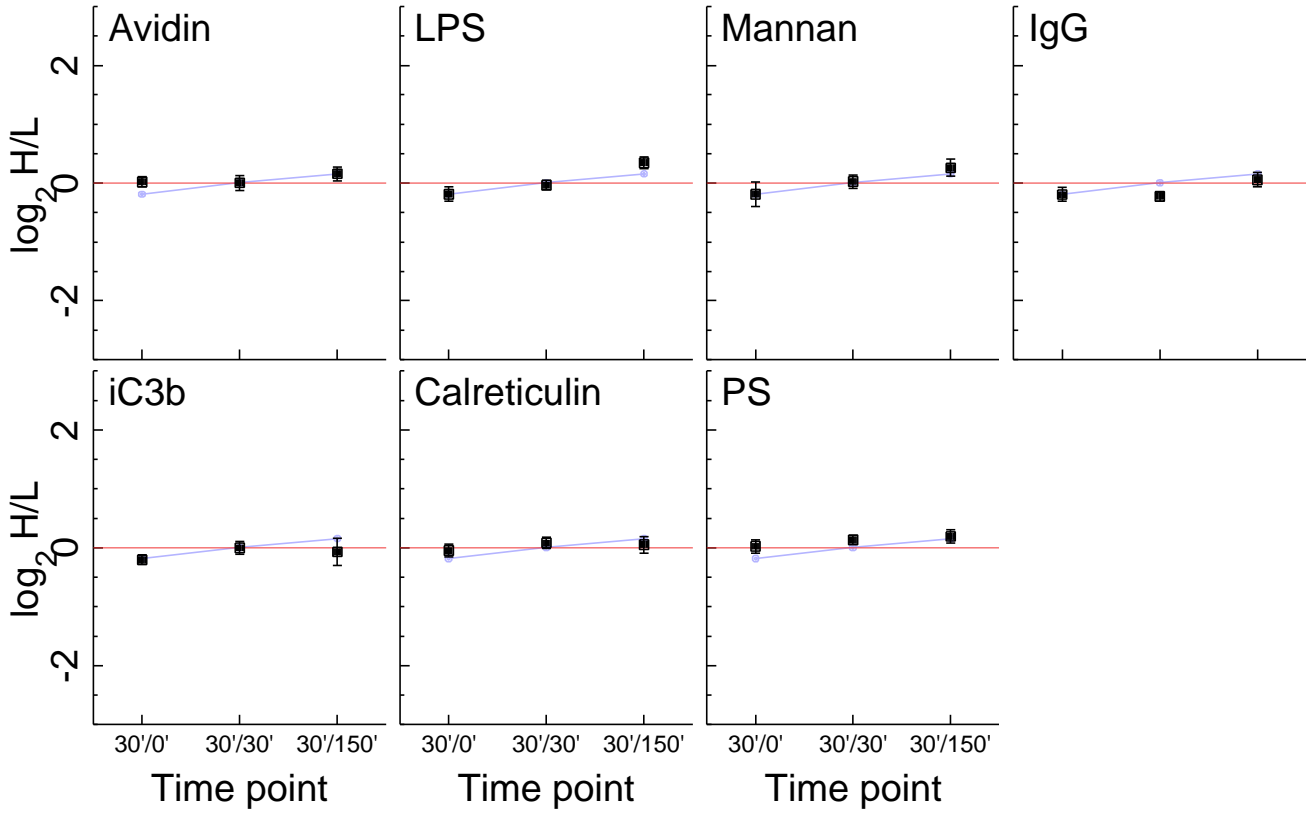

psen2 (Q3U4P5)

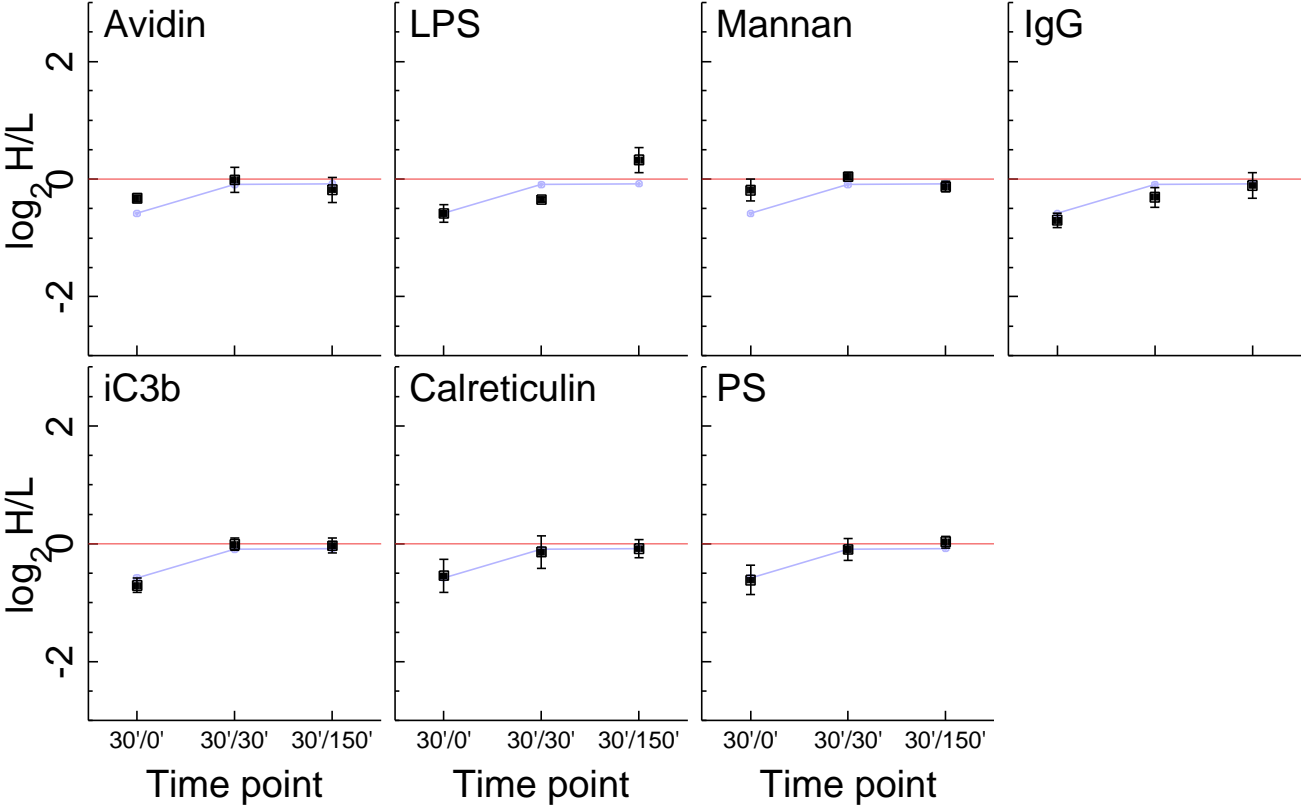

# psma1 (Q9R1P4)

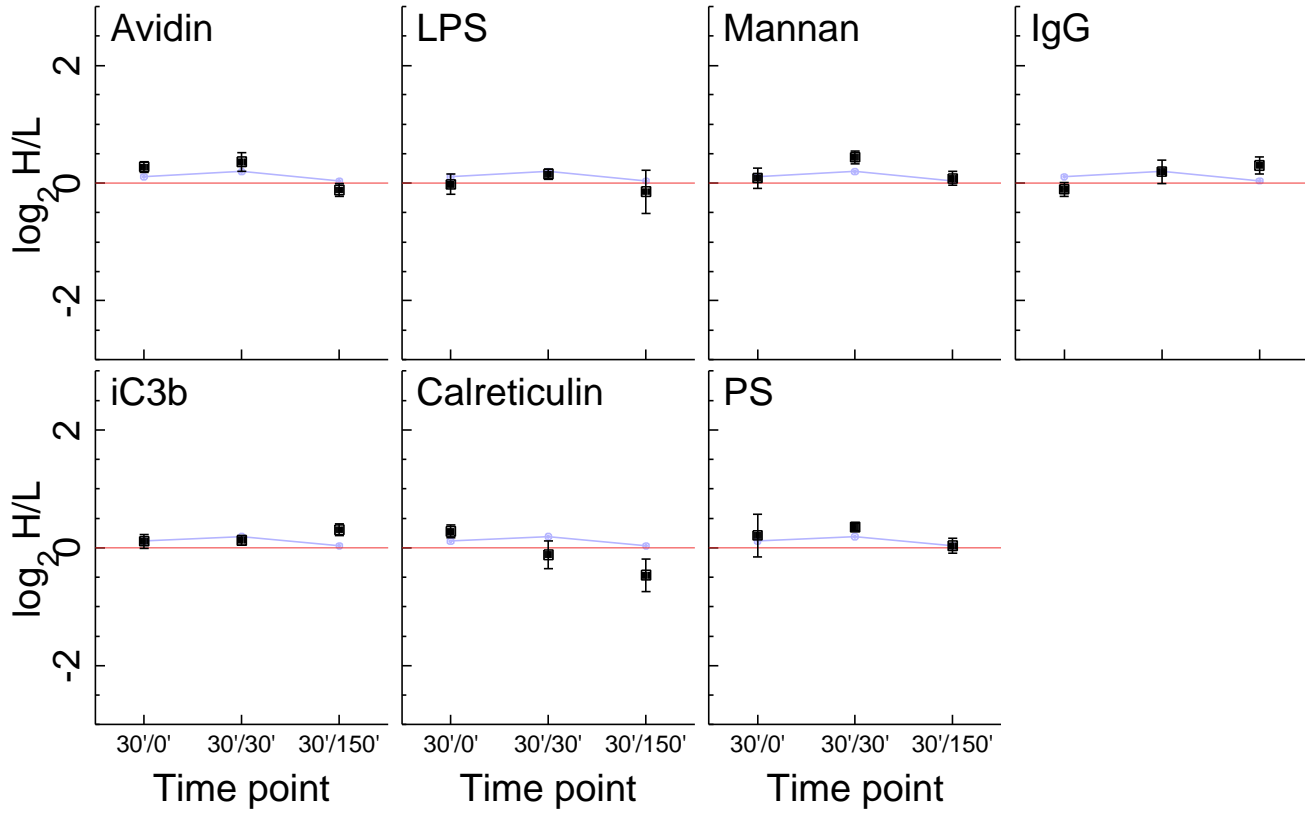

psma4 (Q9R1P0)

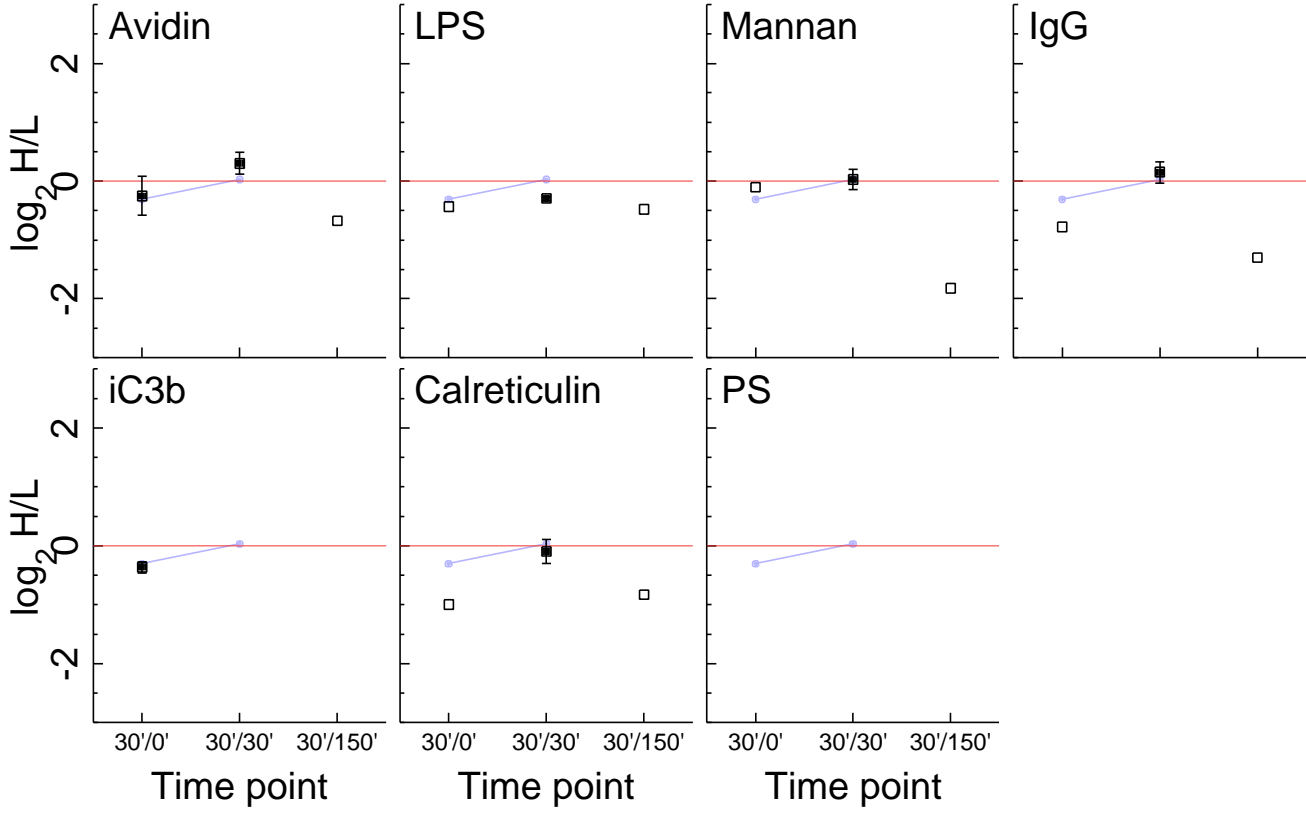

psma6 (Q9QUM9)

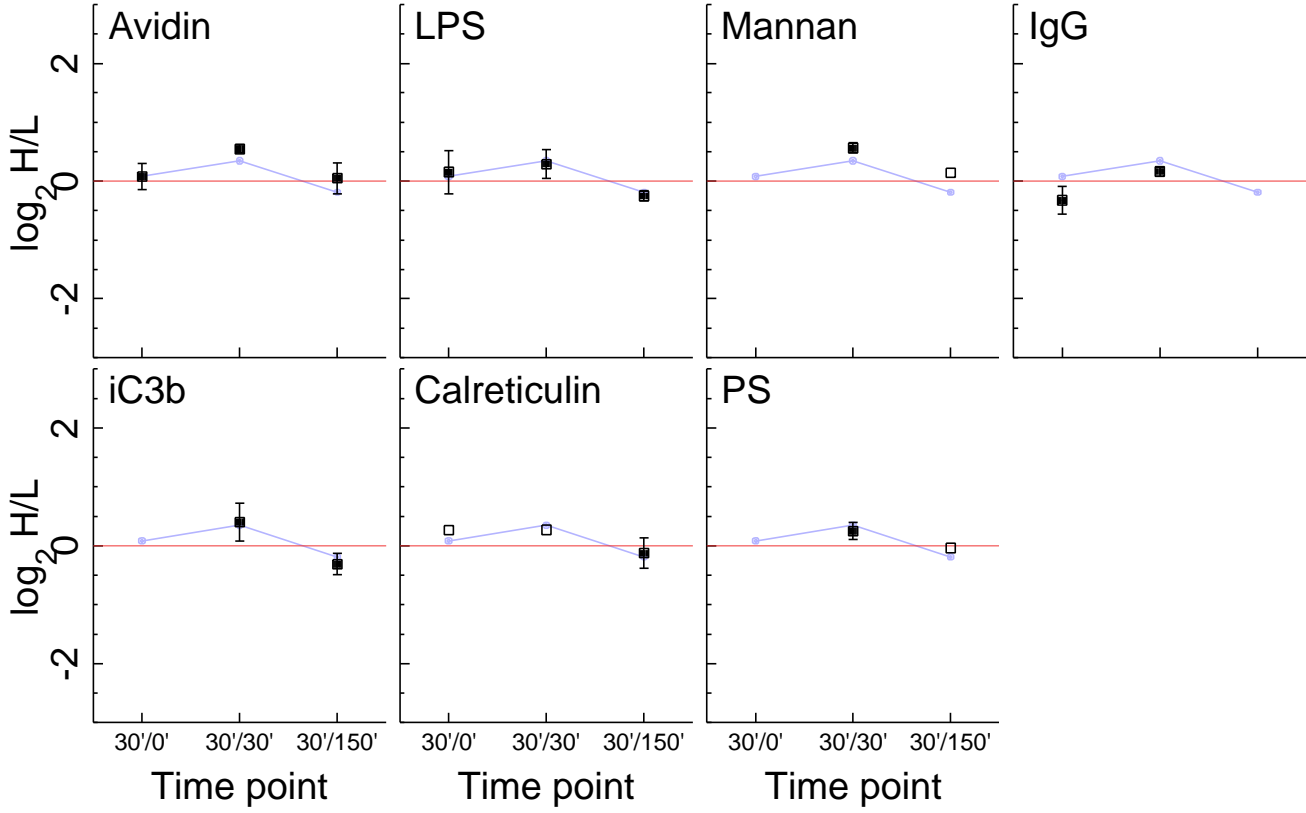



psma7 (Q9Z2U0)

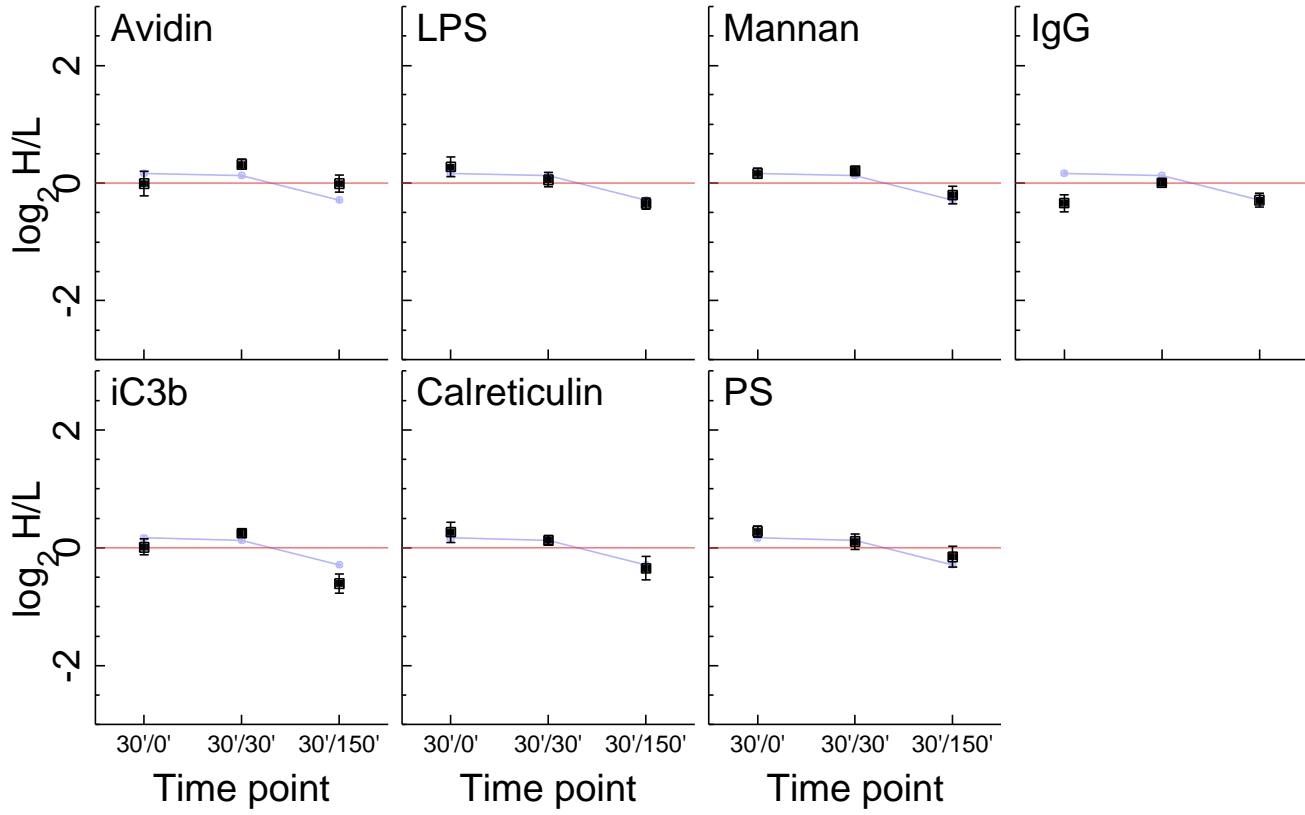

psmb10 (O35955)

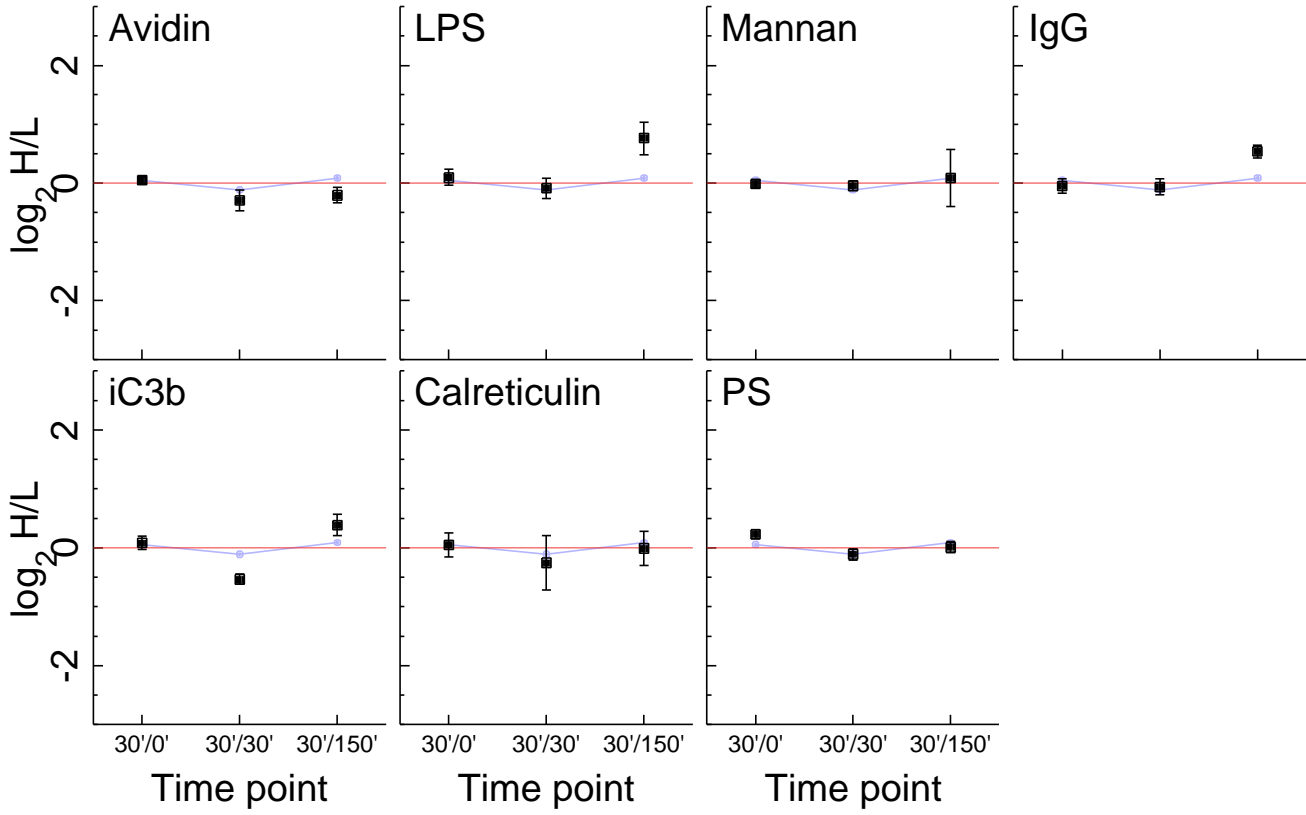

psmb1 (O09061)

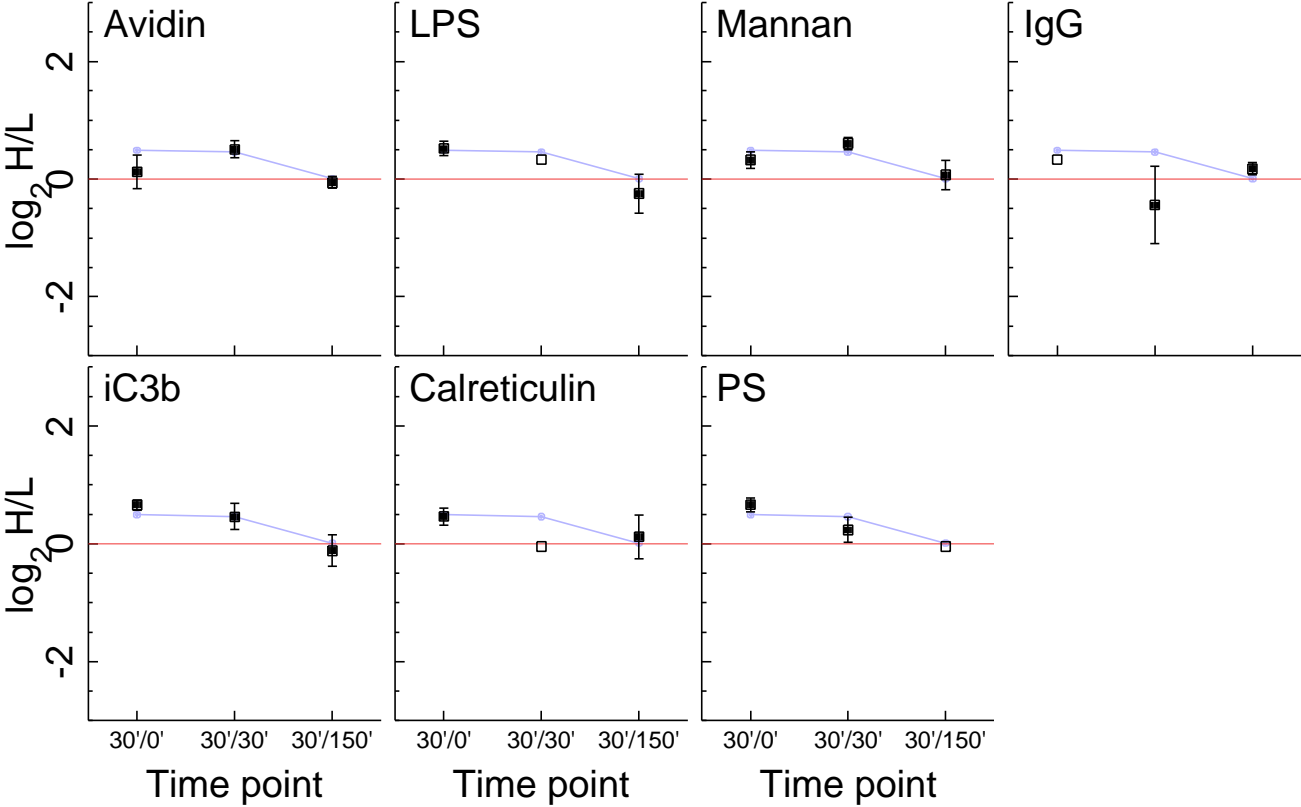

### psmb3 (Q9R1P1)

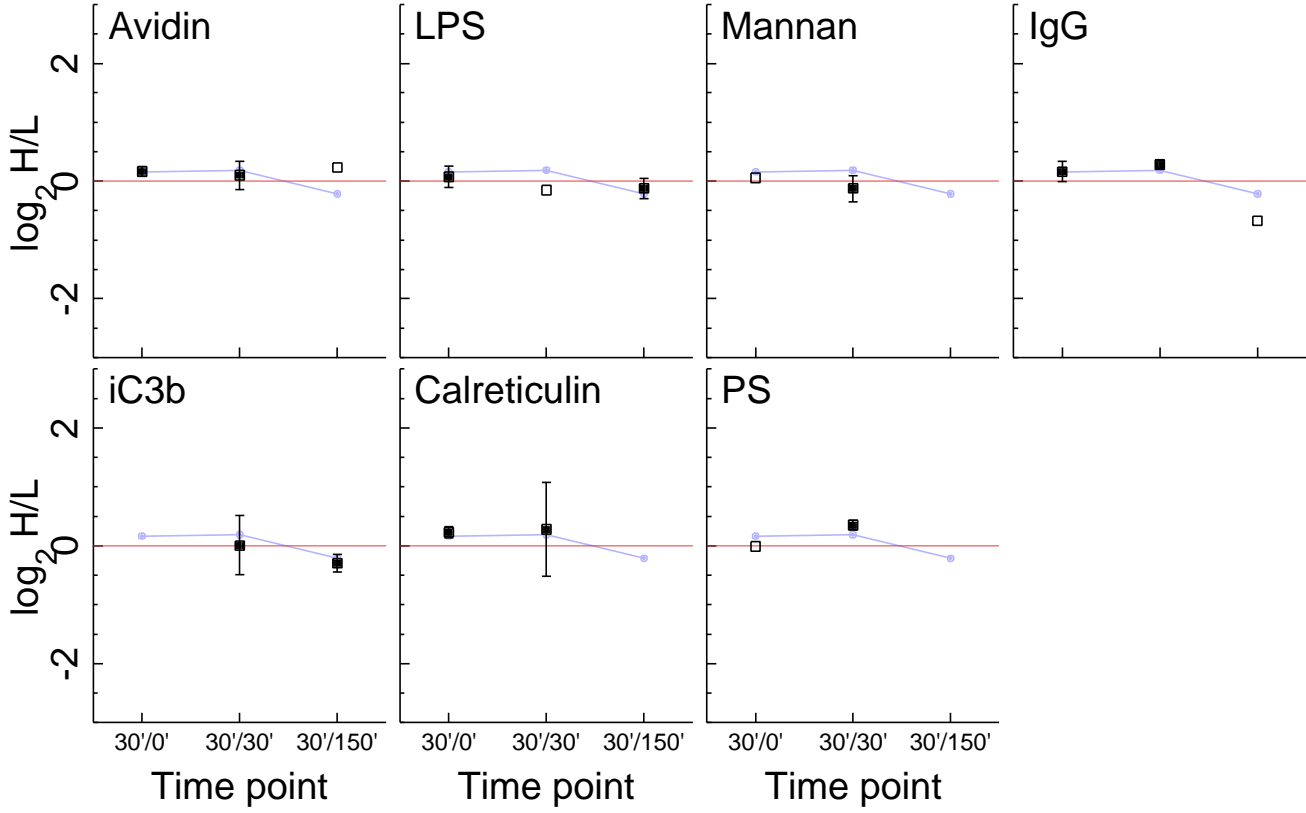

psmb8 (P28063)

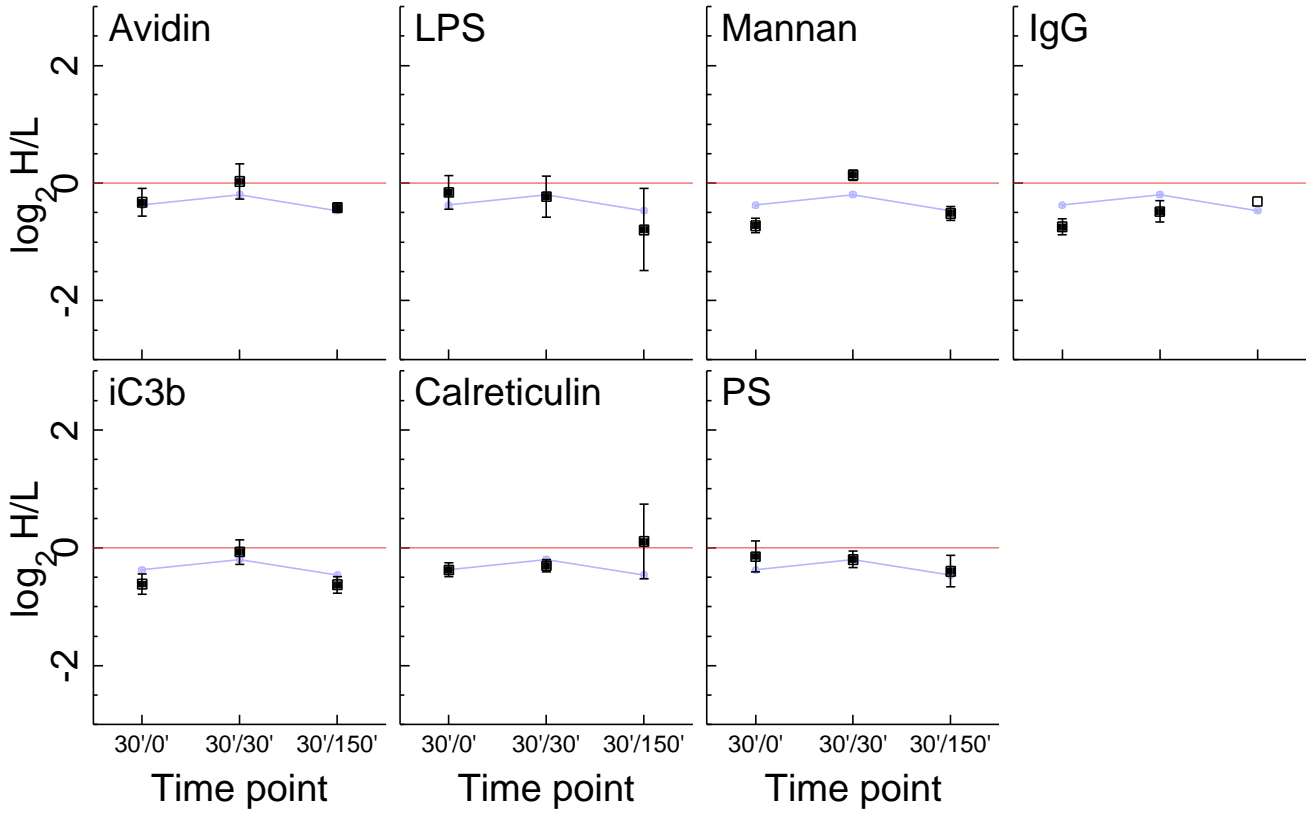

psme1 (P97371)

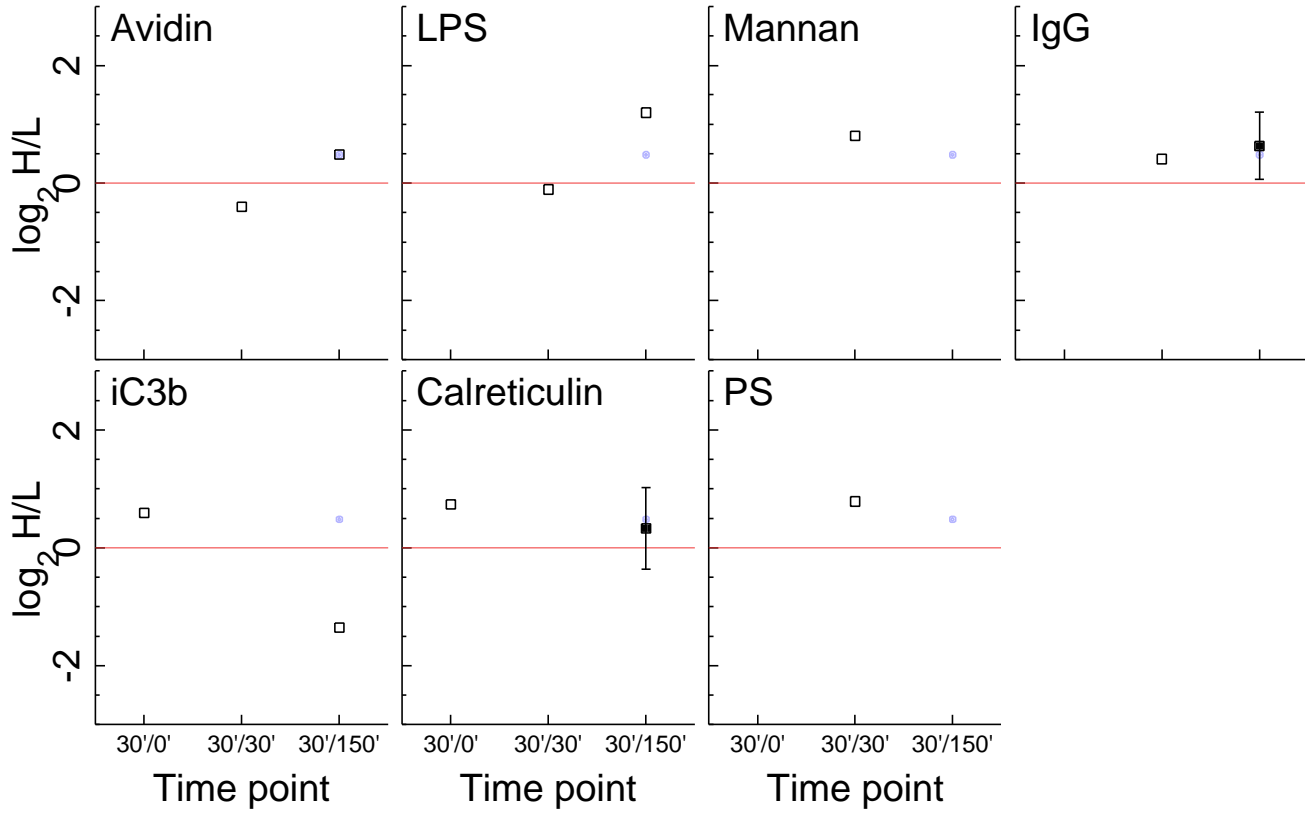

pstpip1 (P97814)

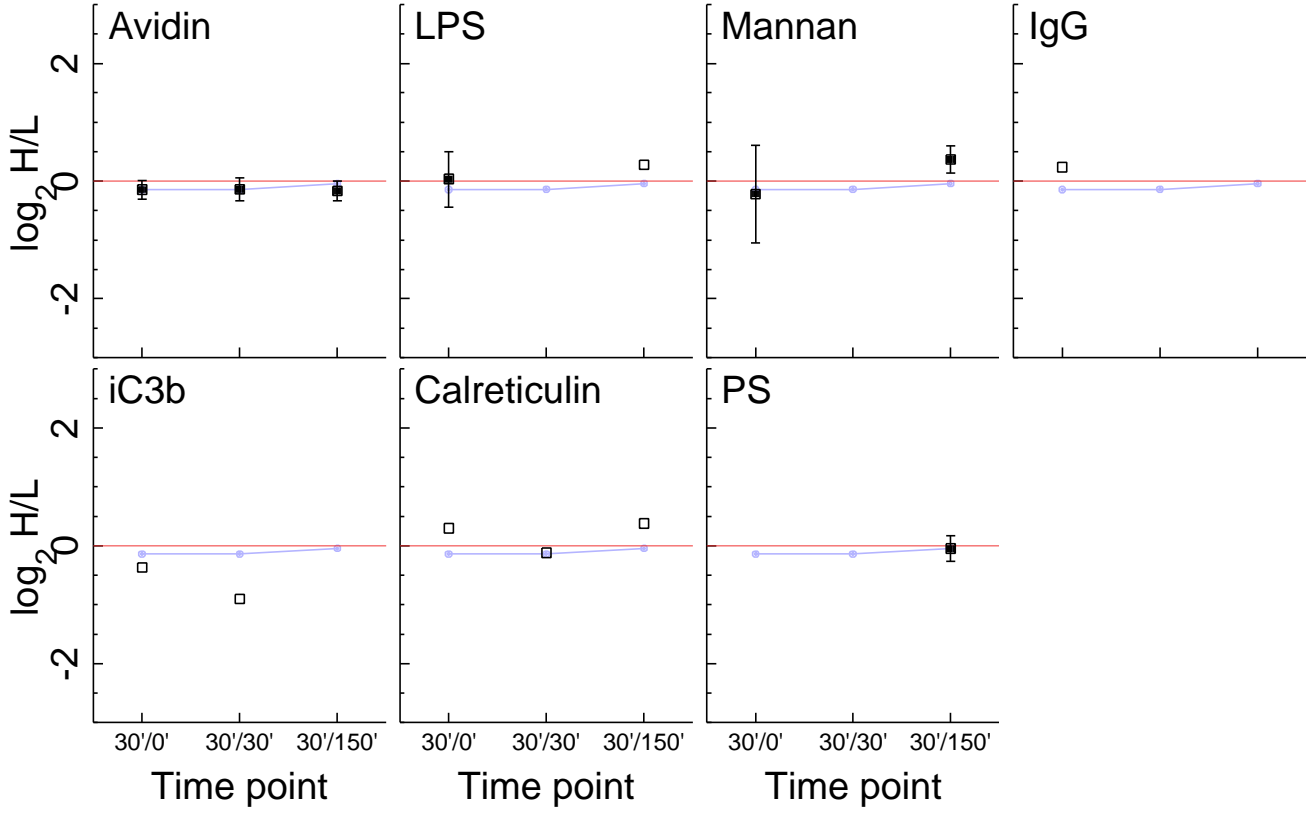

ptbp1 (Q922I7)

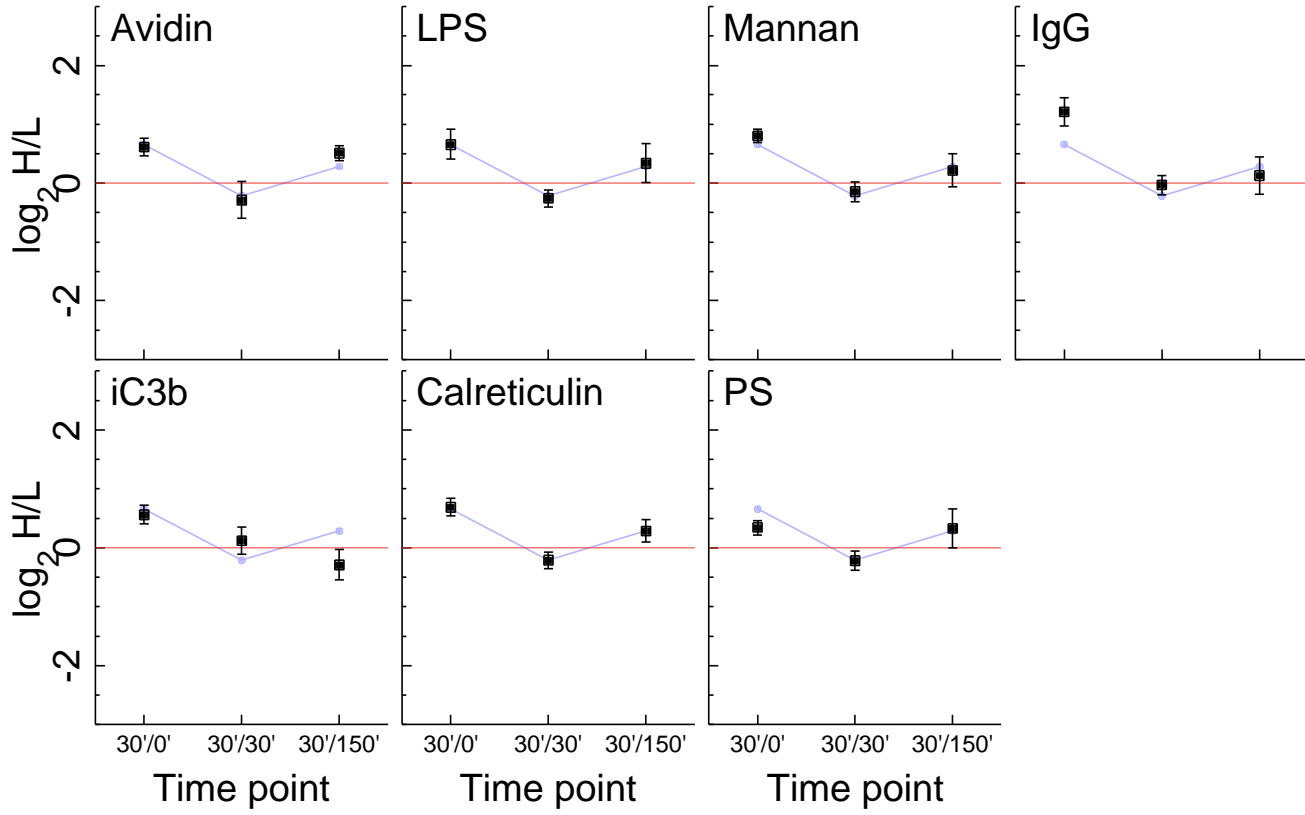



ptgs1 (P22437)

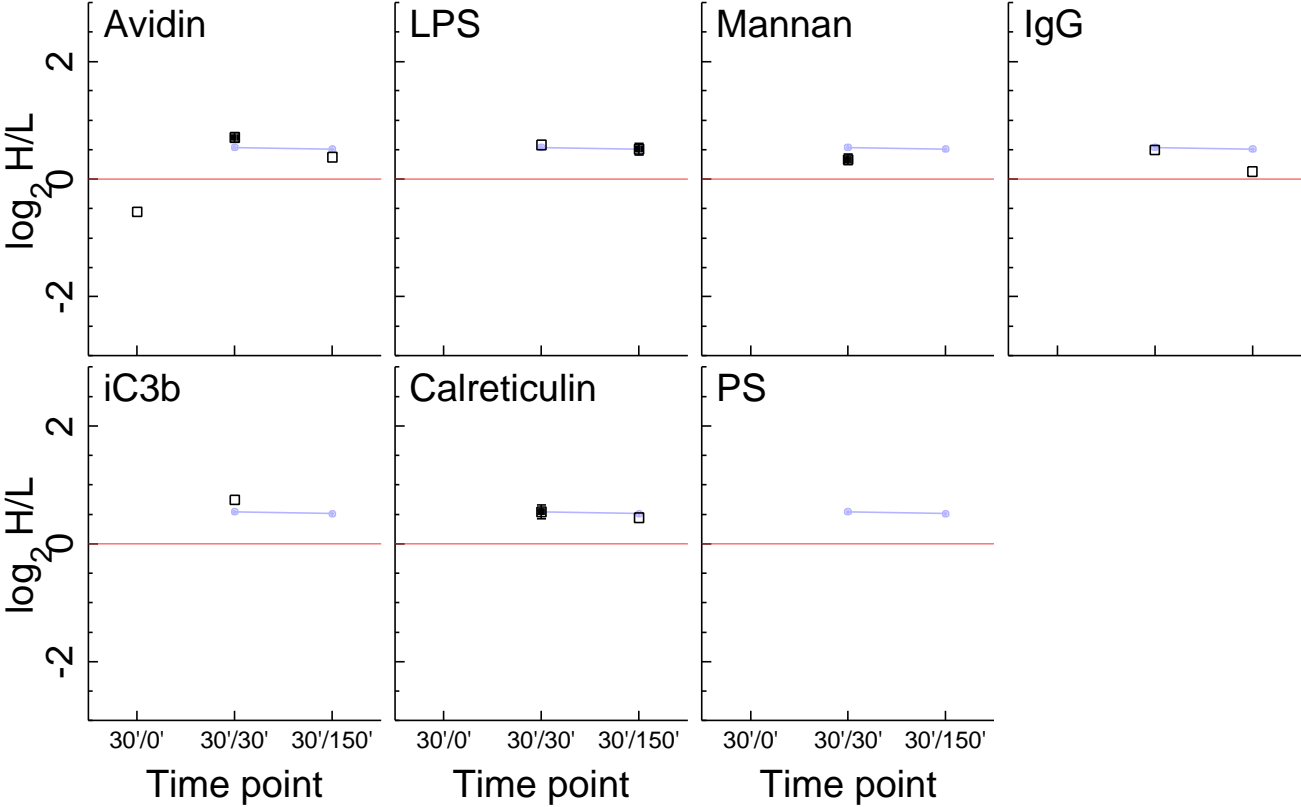

ptp4a2 (O70274)

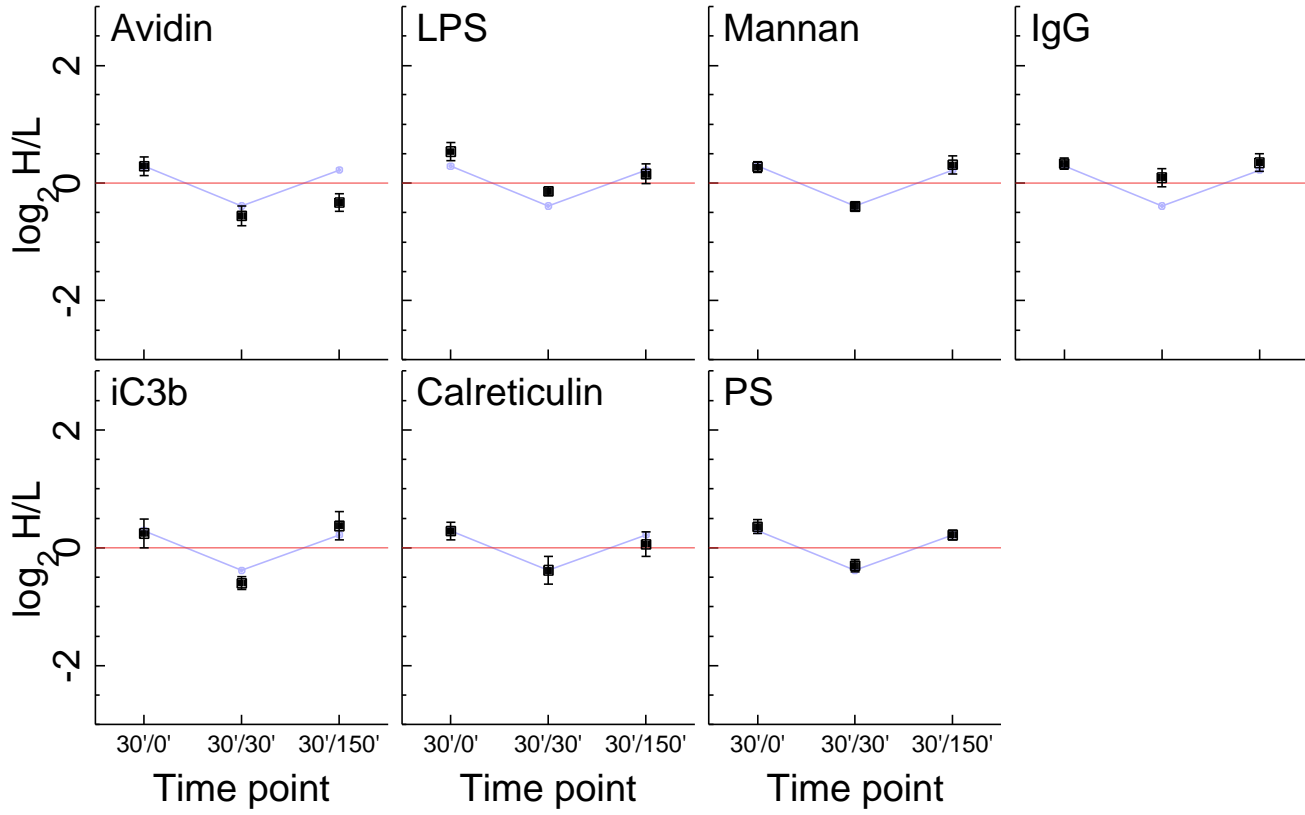

ptplad1 (Q8K2C9)

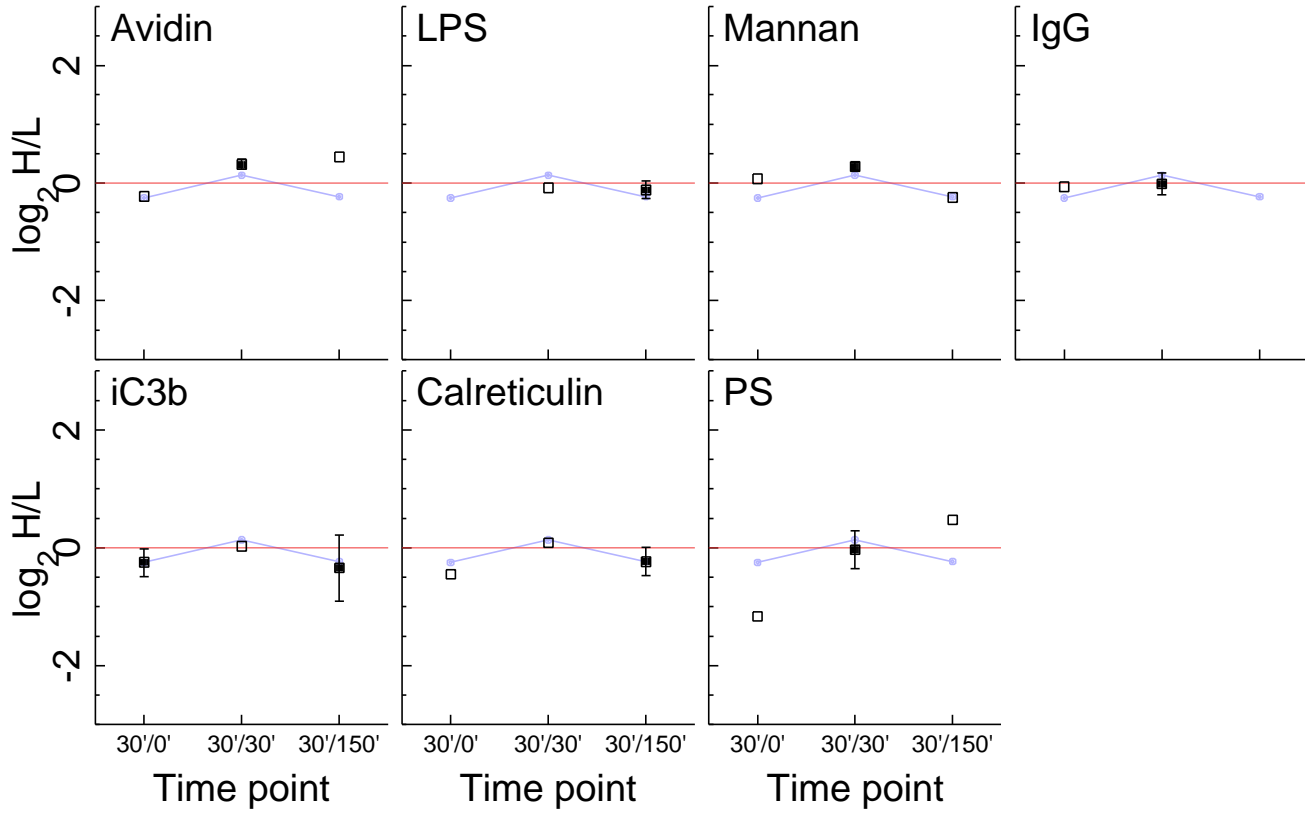

ptpn1 (P35821)

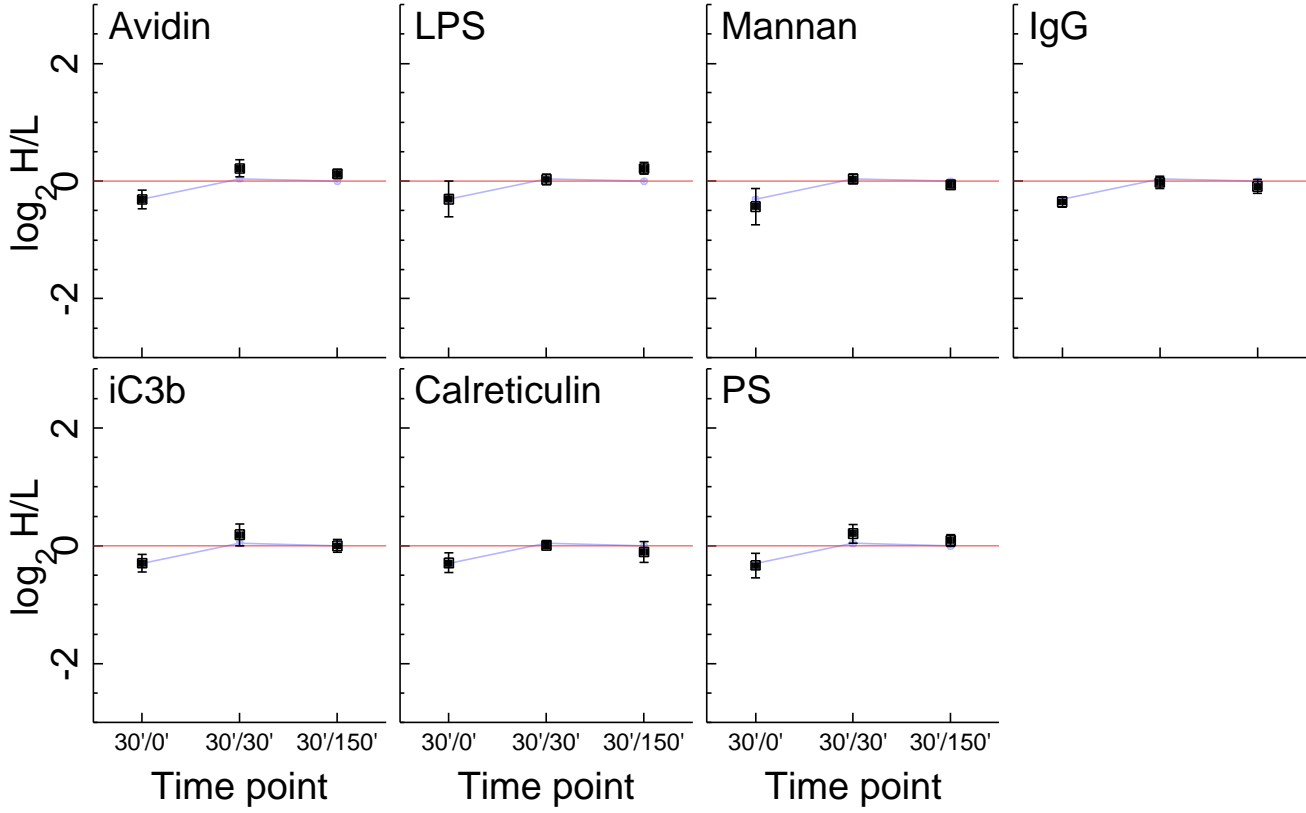

ptpn23 (Q6PB44)

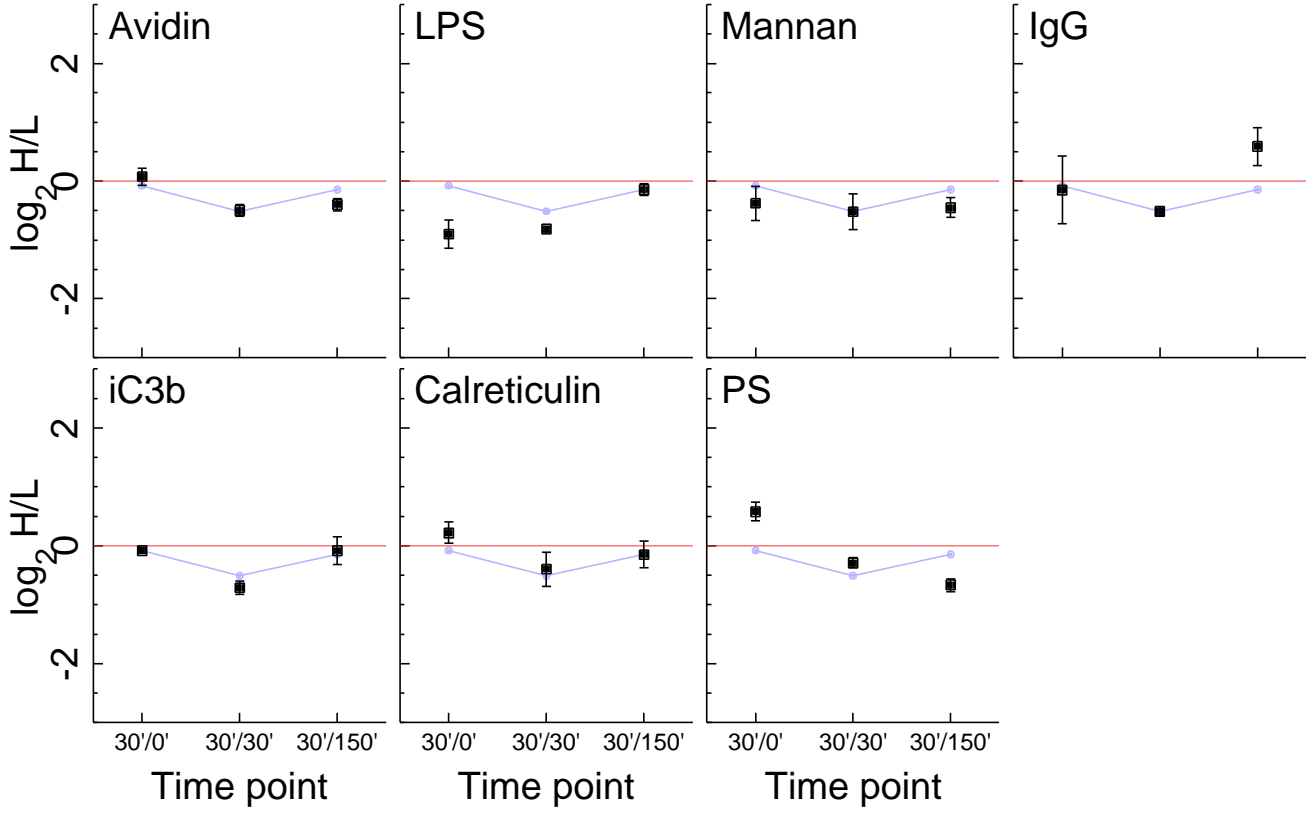

ptpn6 (P29351)

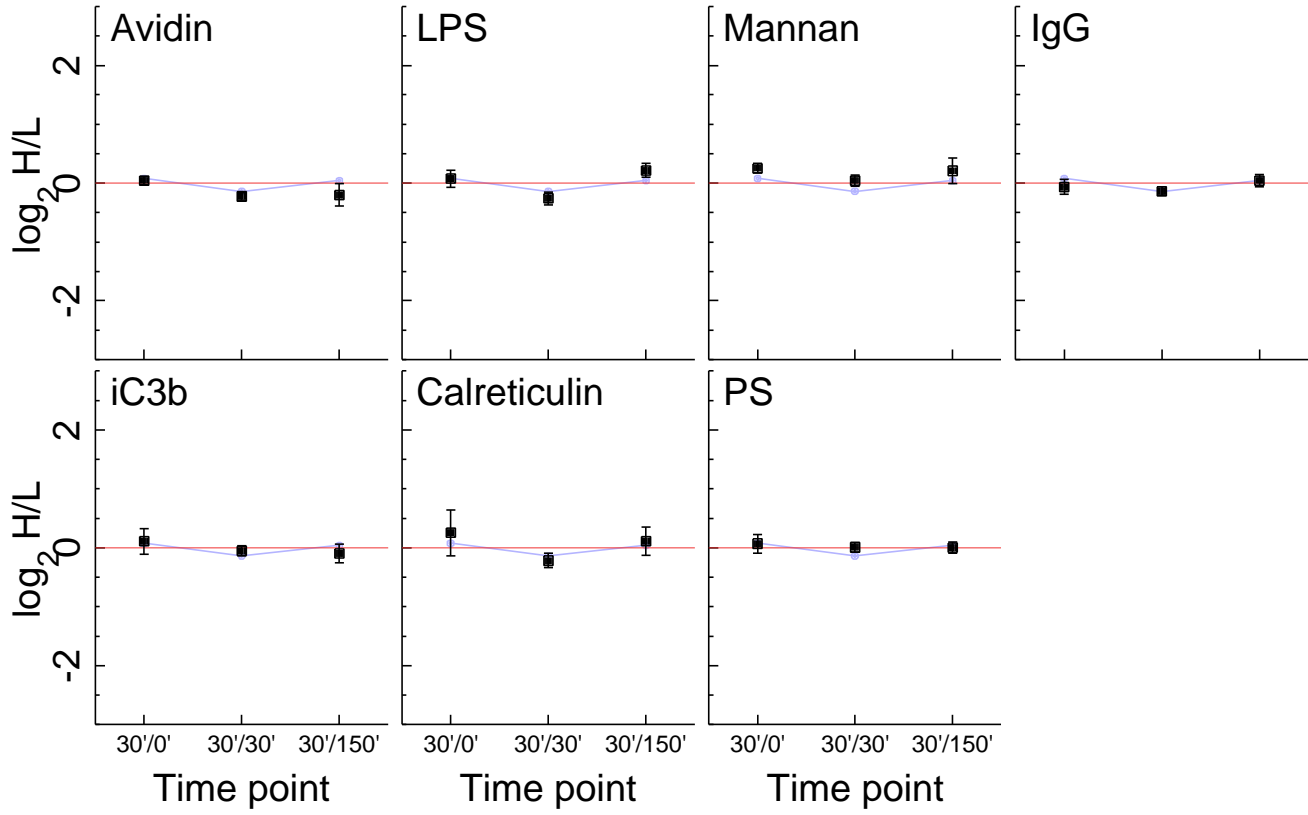

ptpn9 (O35239)

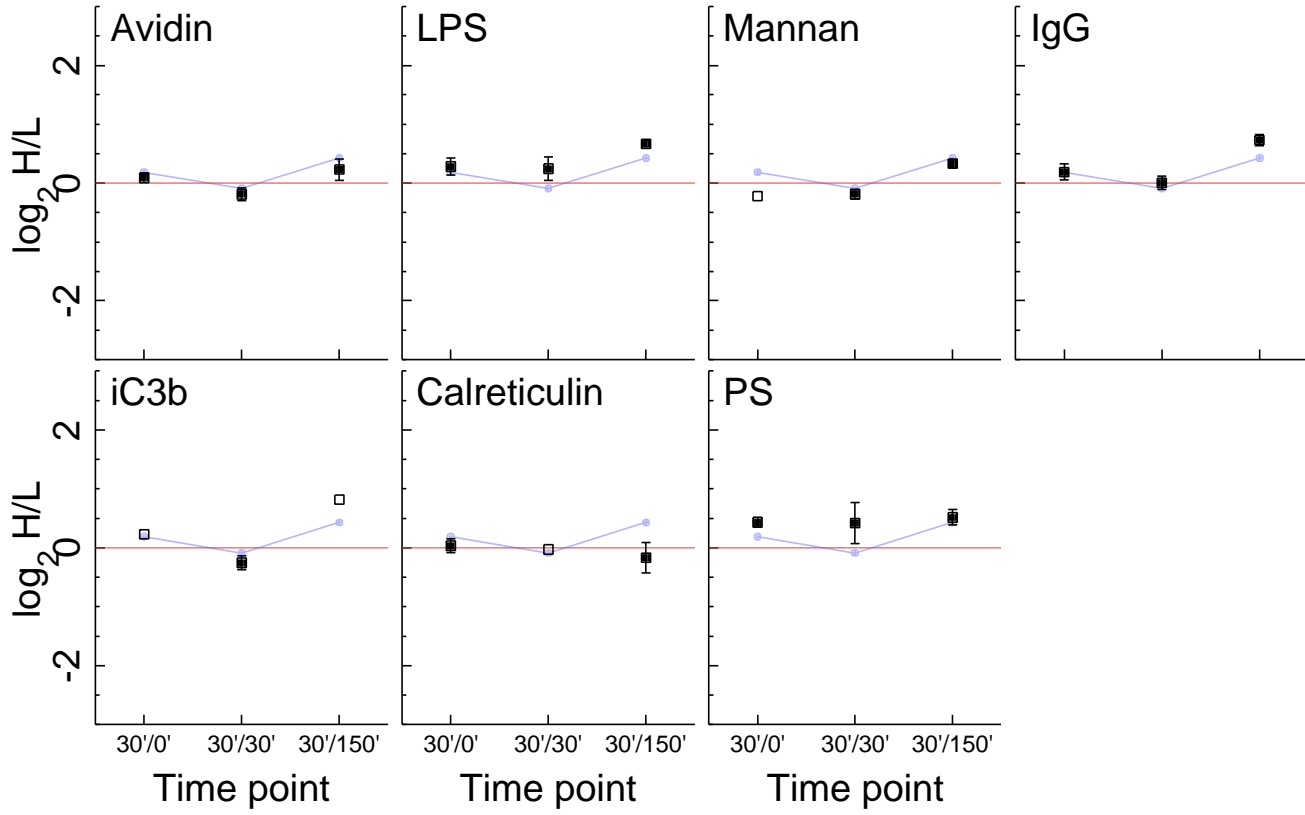

ptpra (P18052)

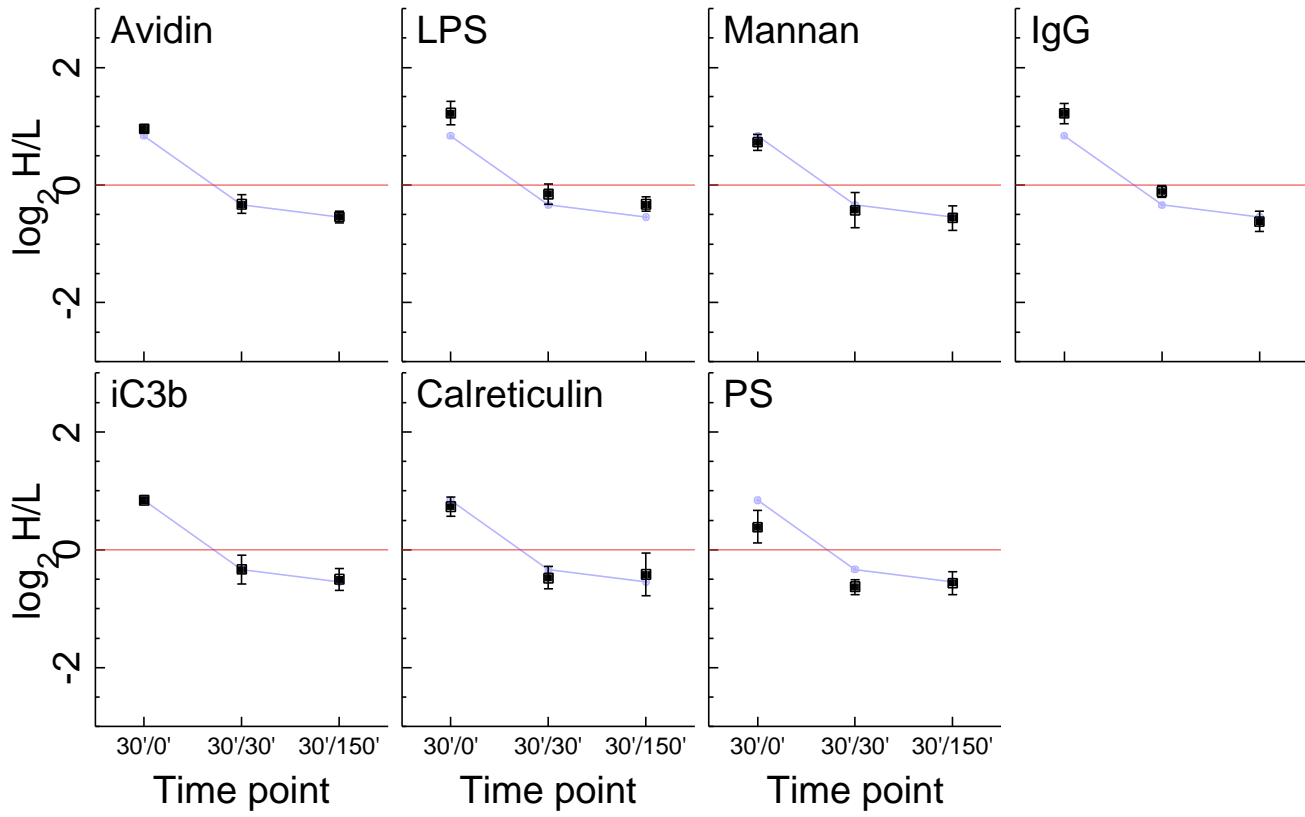



ptprc (P06800)

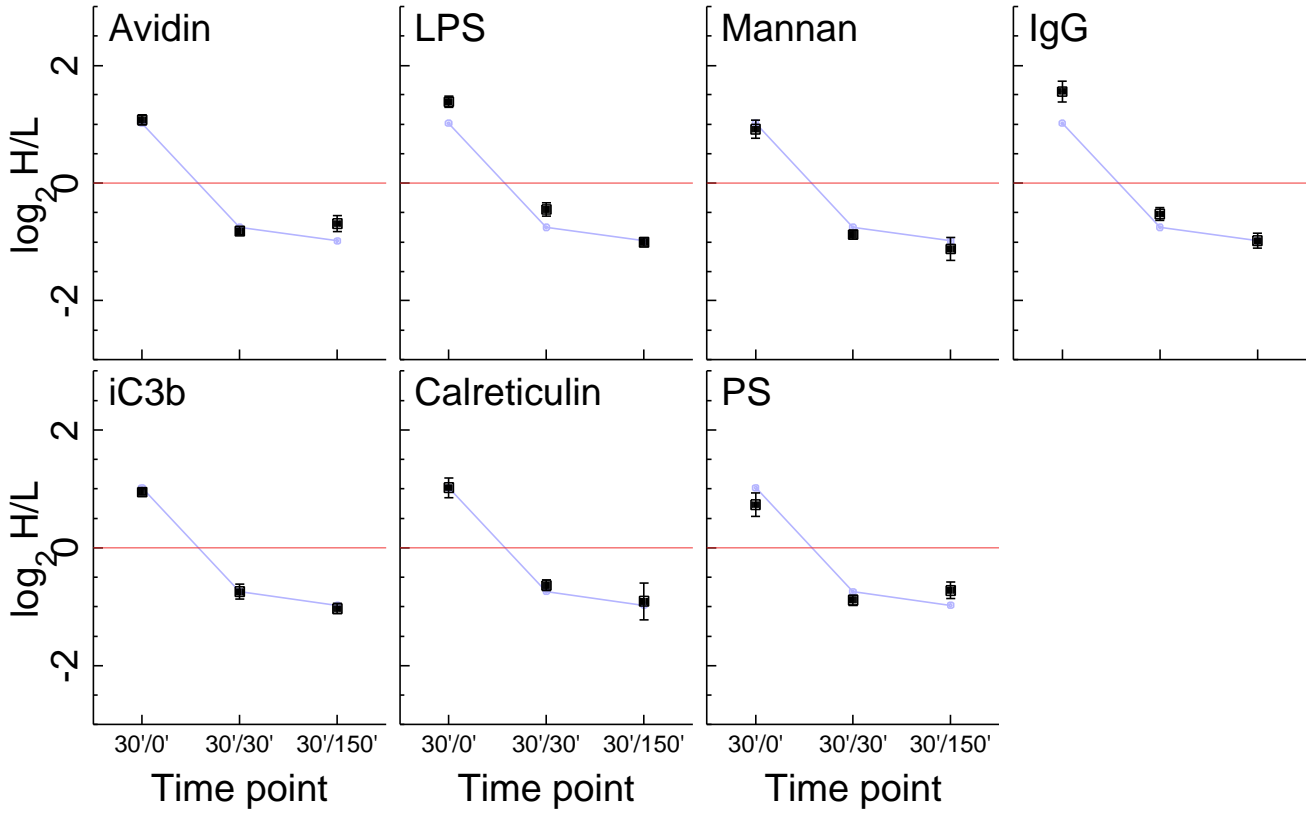

ptpre (P49446)

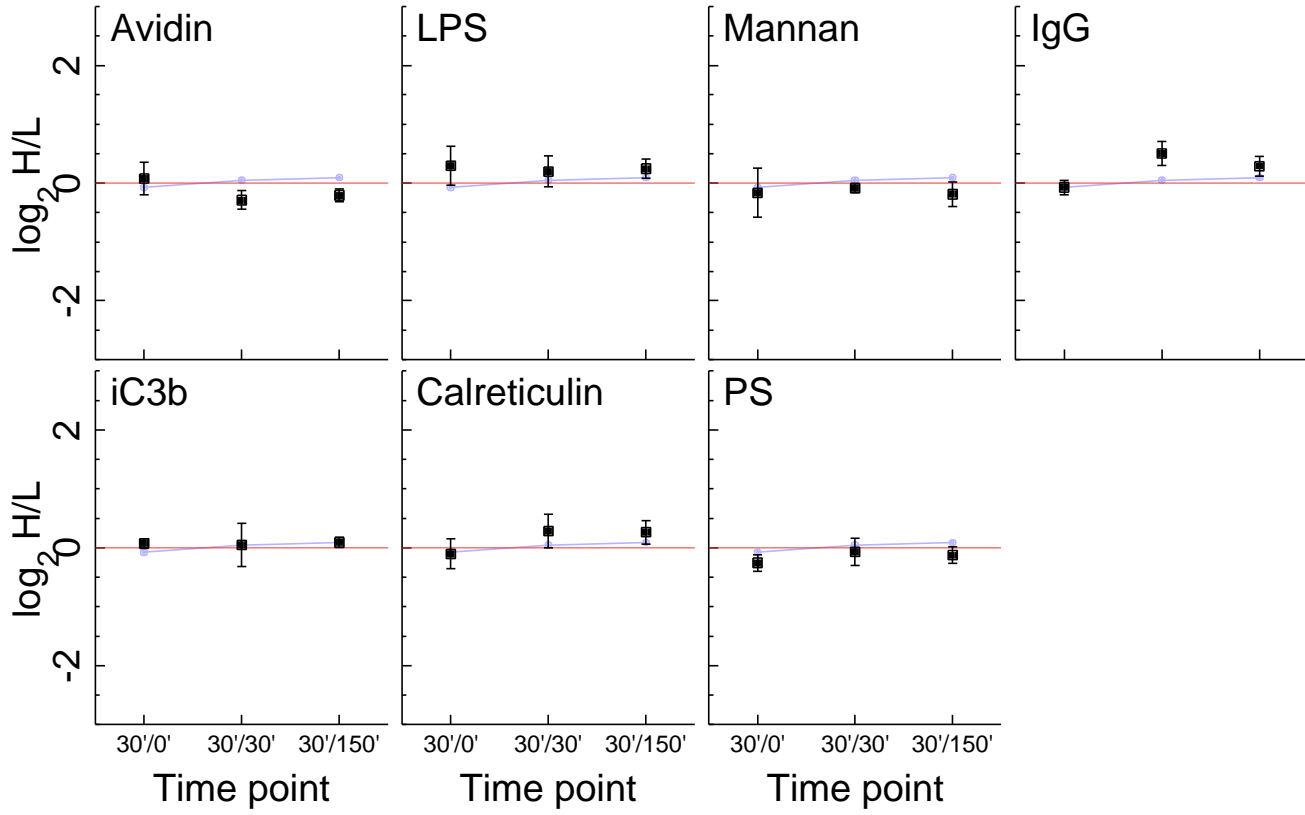

ptprj (E9Q4S7)

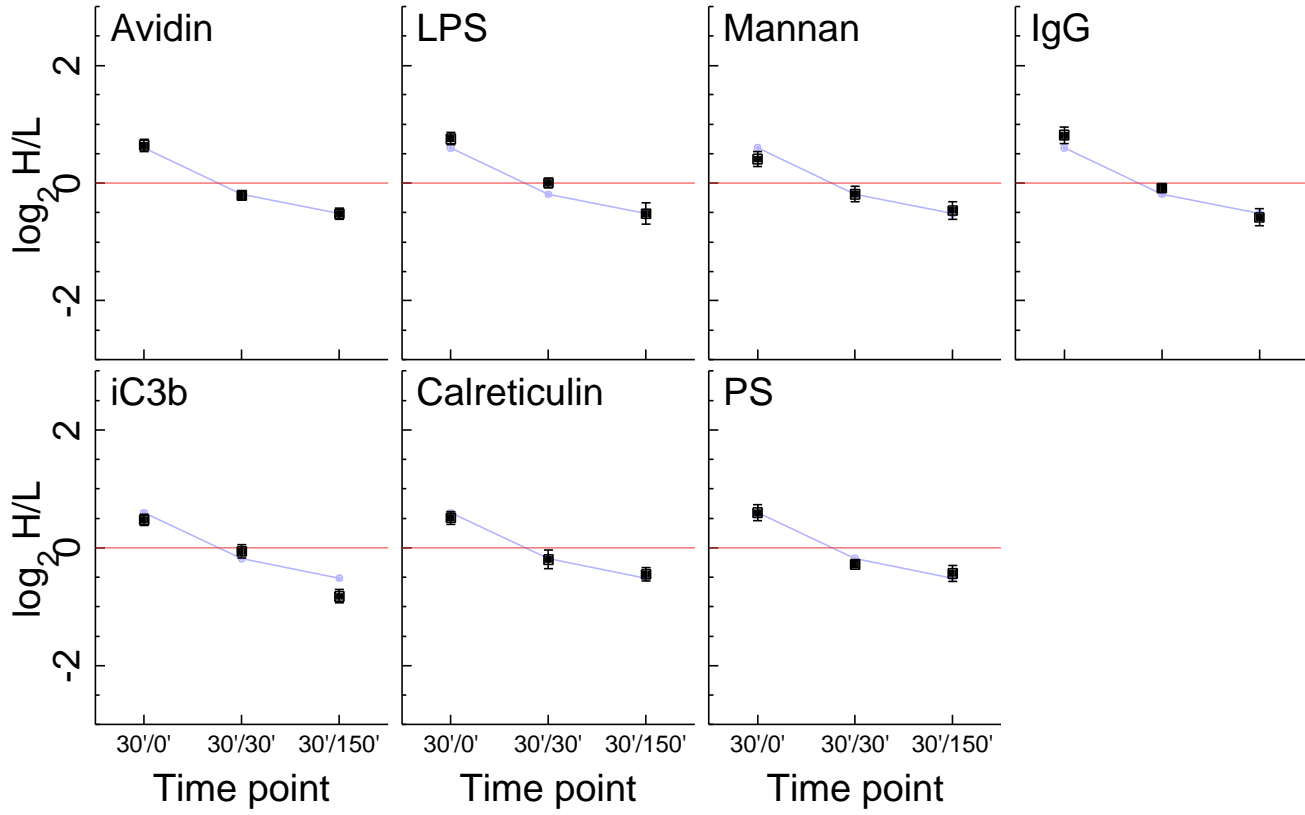

ptpro (E9Q612)

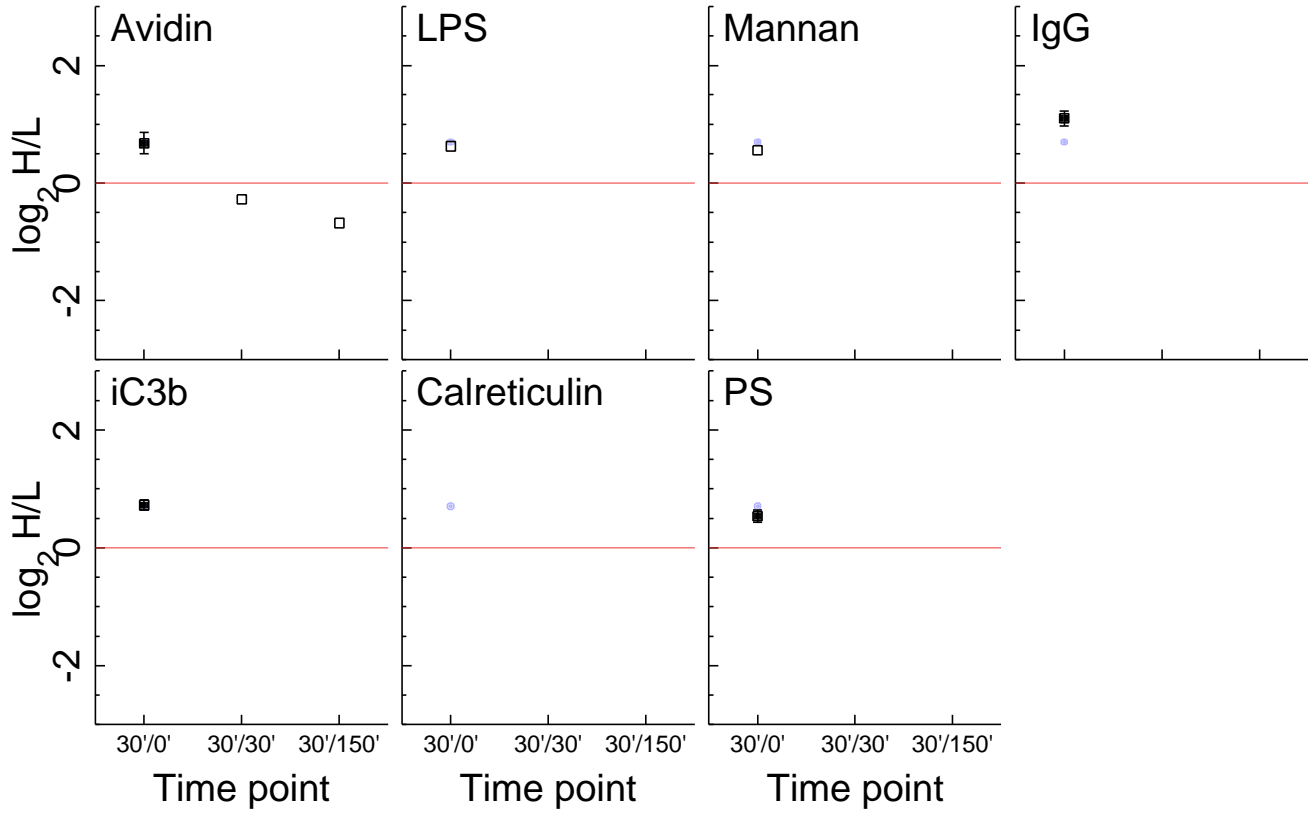

ptrh2 (Q8R2Y8)

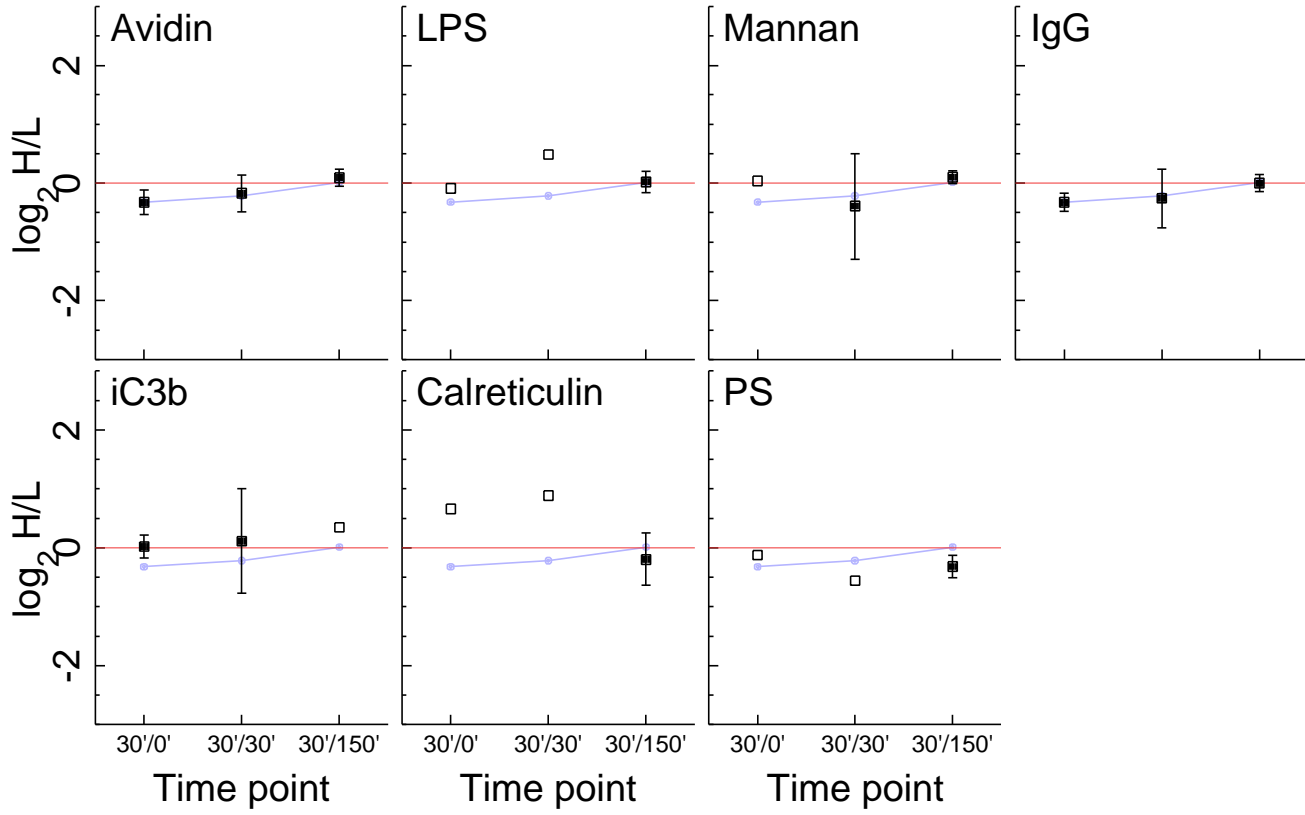

pttg1ip (Q8R143)

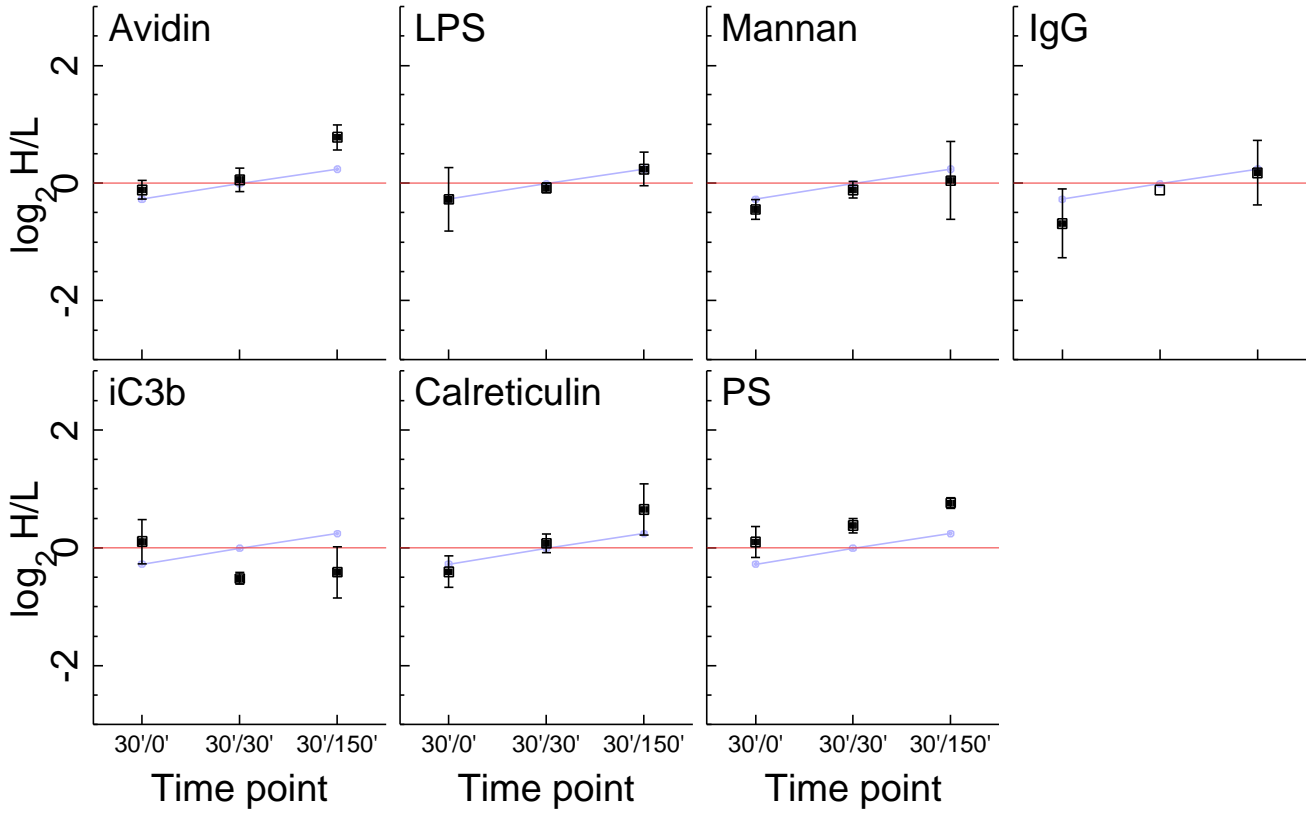

pxk (Q8BX57)

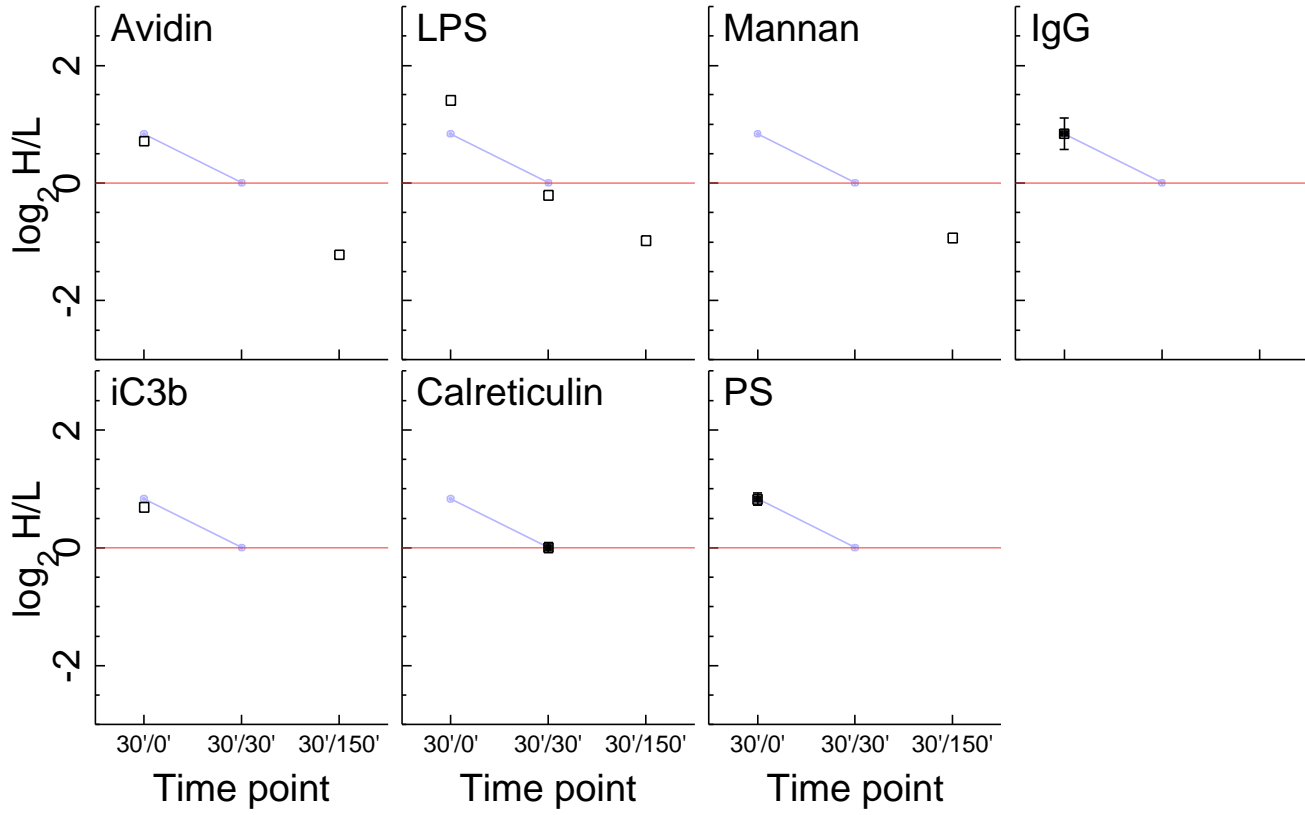

pzp (D3YW52)

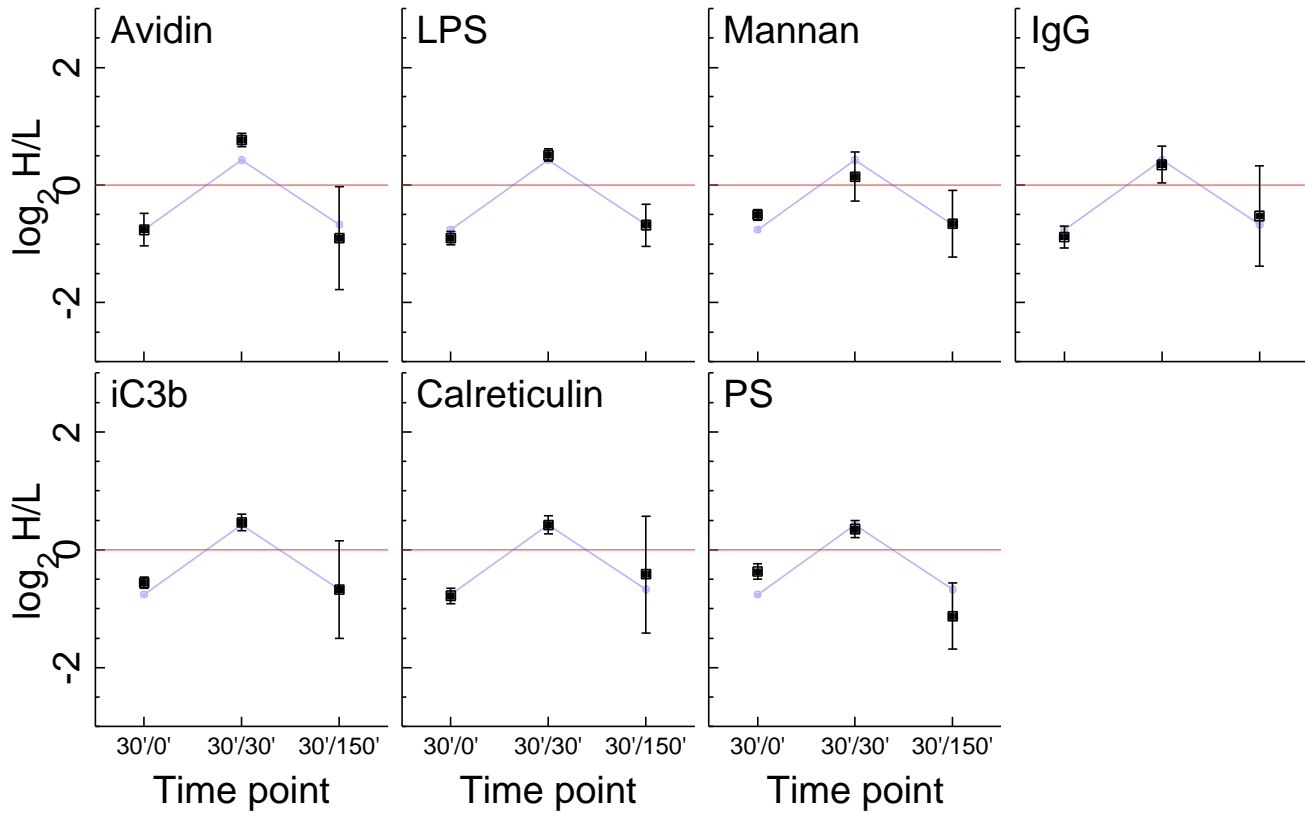



### q3tys2 (Q3TYS2)

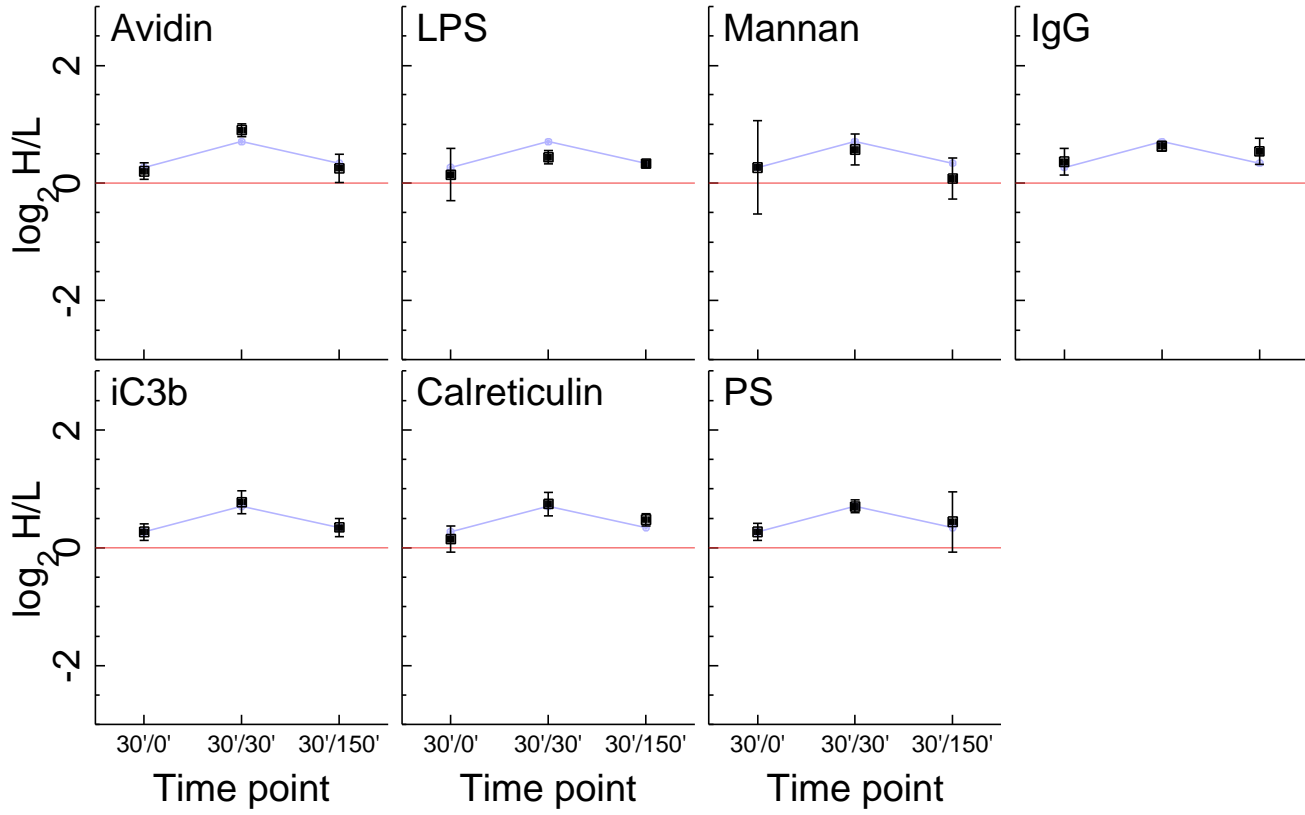

q5f285 (Q5F285)

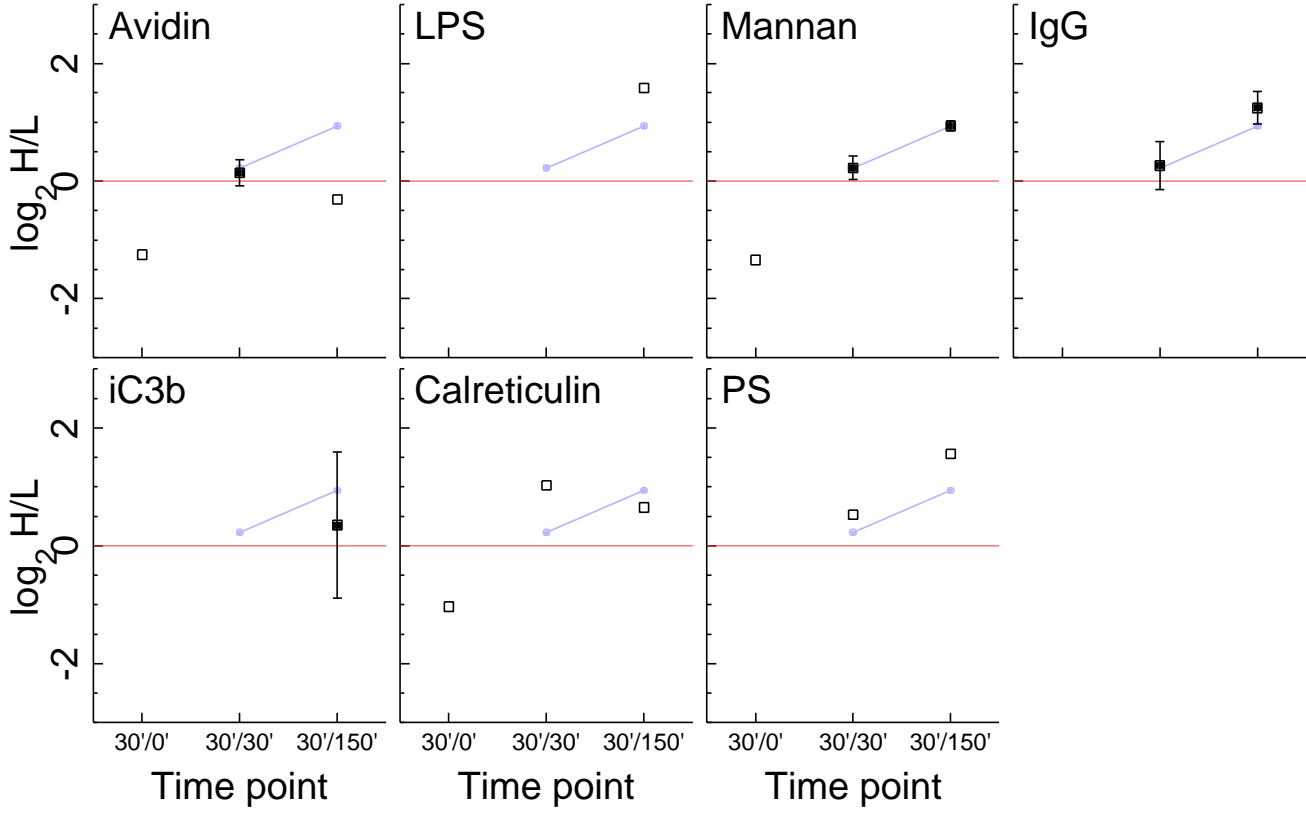

q6piu9 (Q6PIU9)

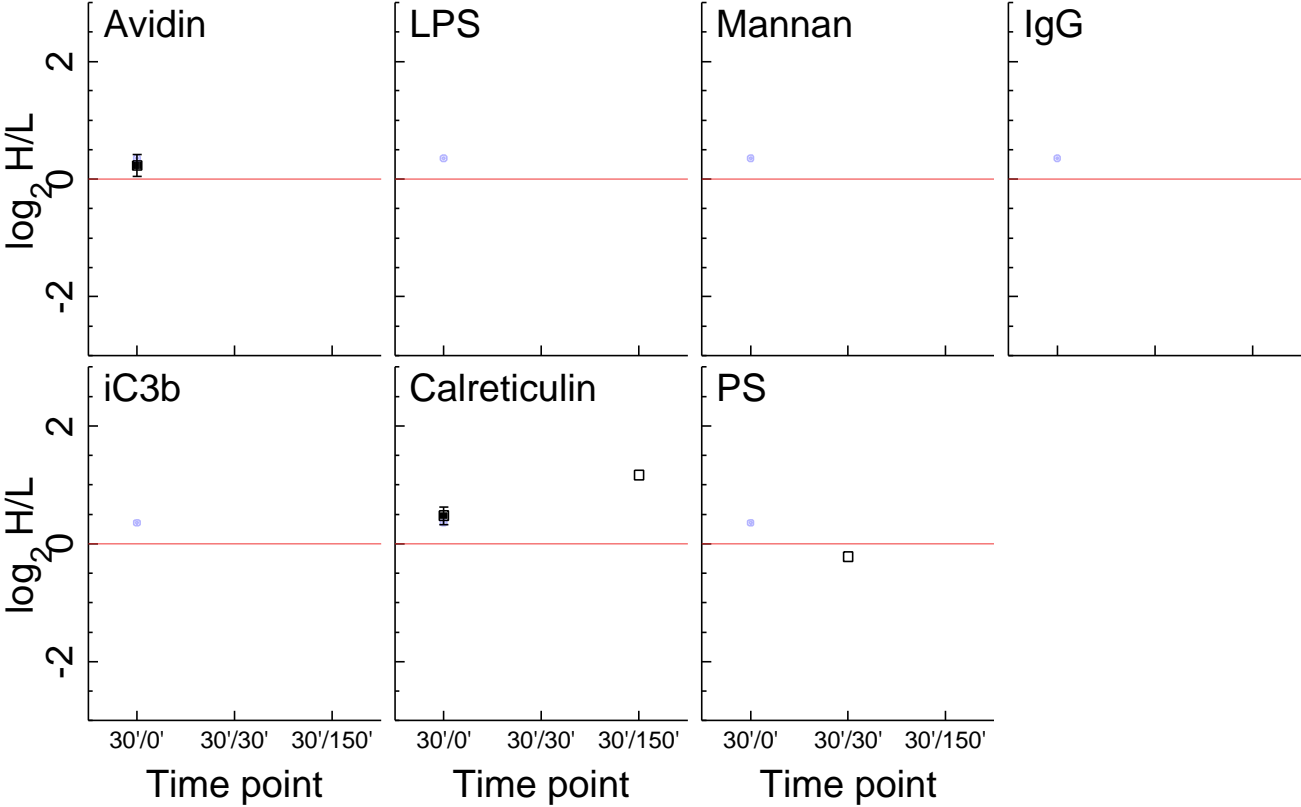

### q7m6y3-5 (Q7M6Y3)

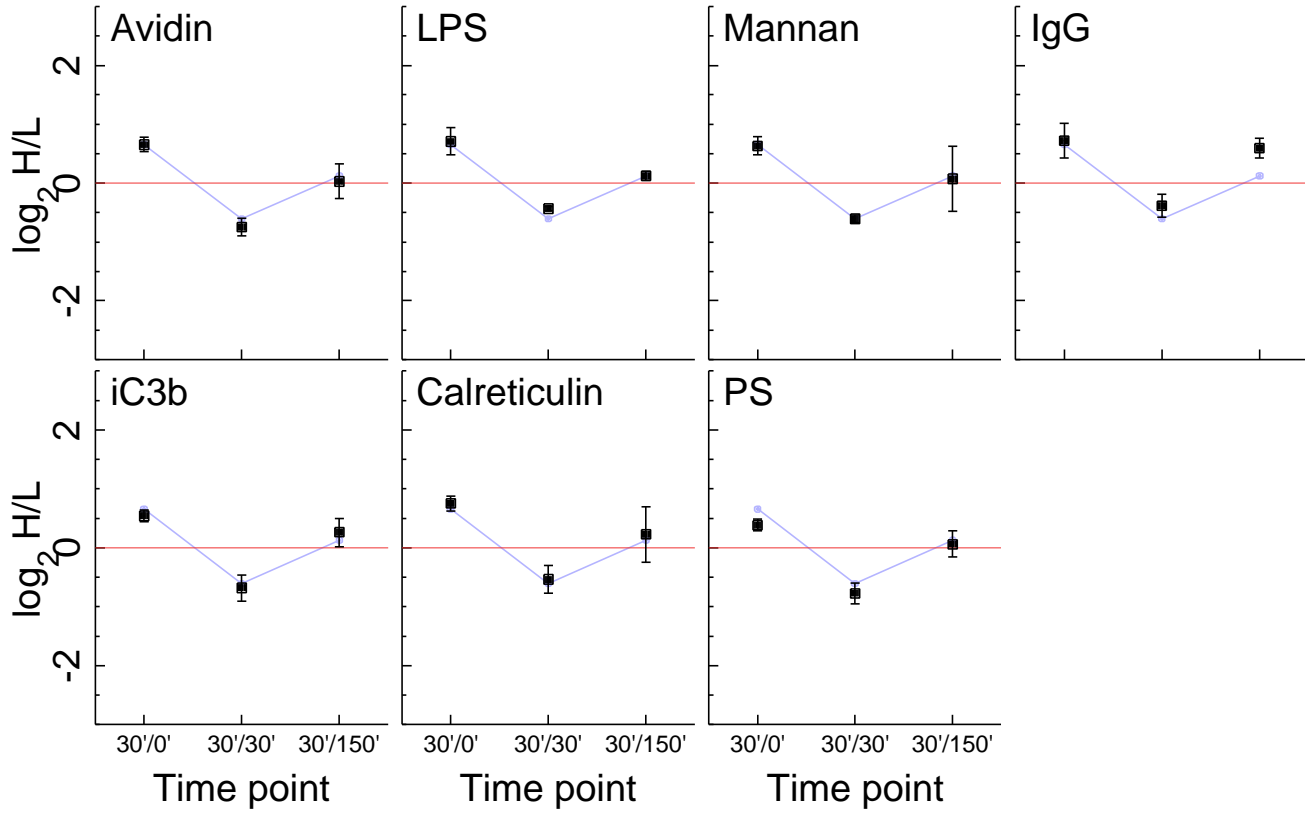

### q8c708 (Q8C708)

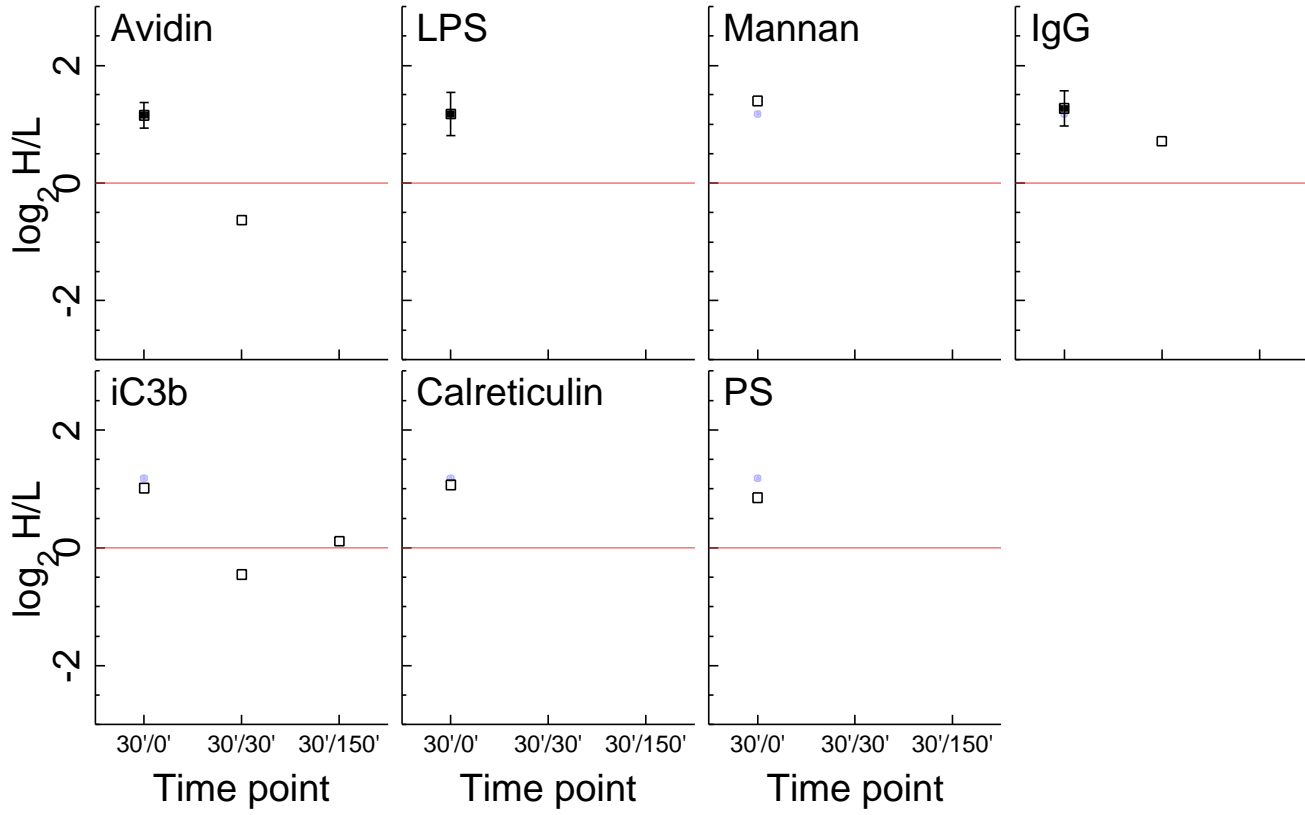

### q8caq8-3 (Q8CAQ8)

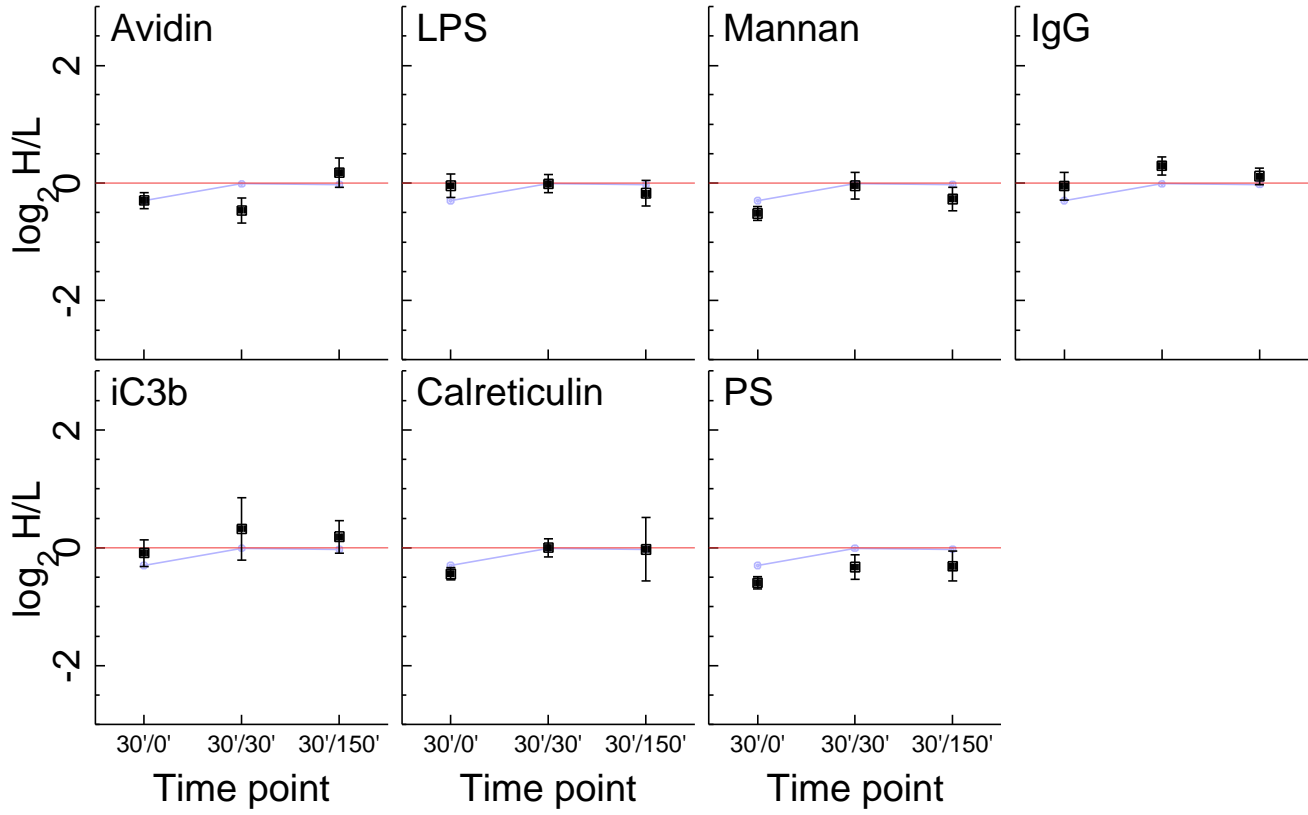

### q8cf66 (Q8CF66)

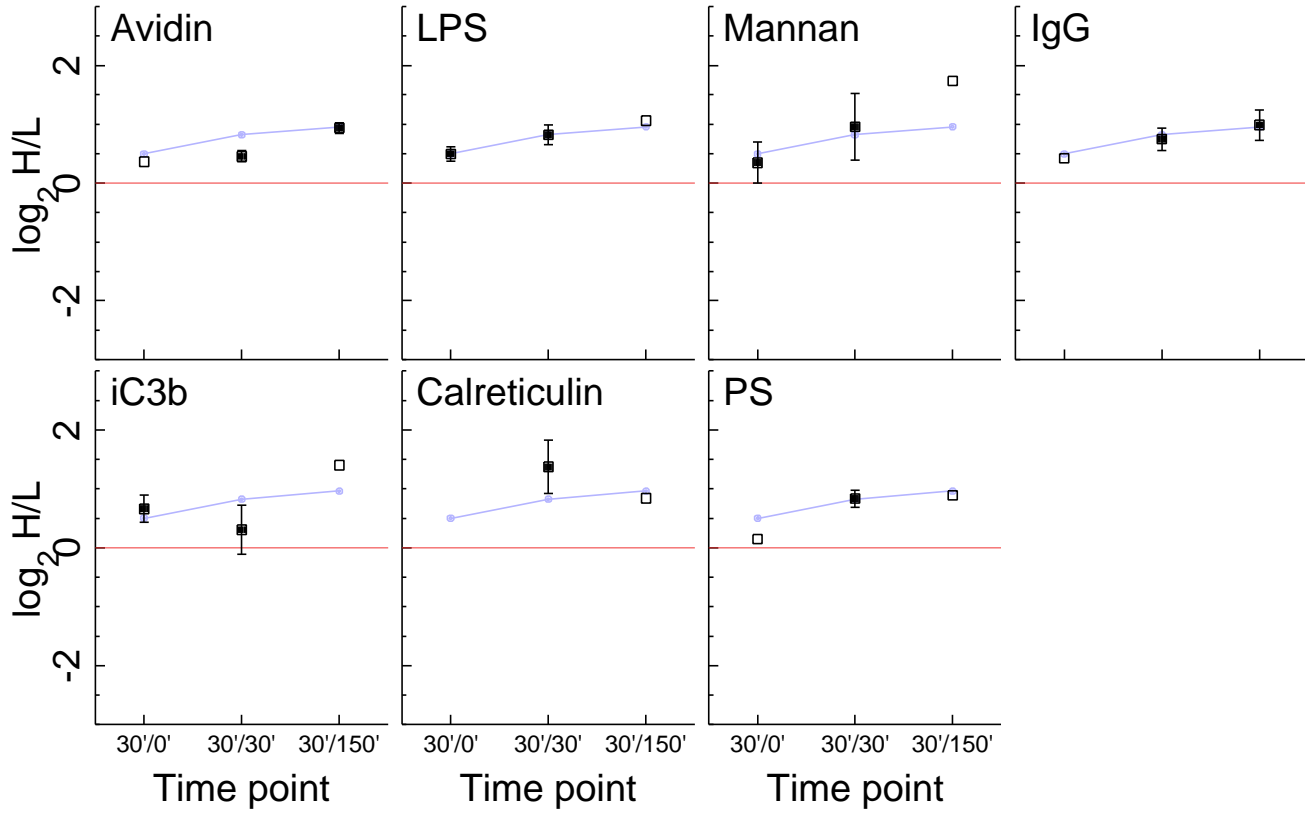

q8k039 (Q8K039)

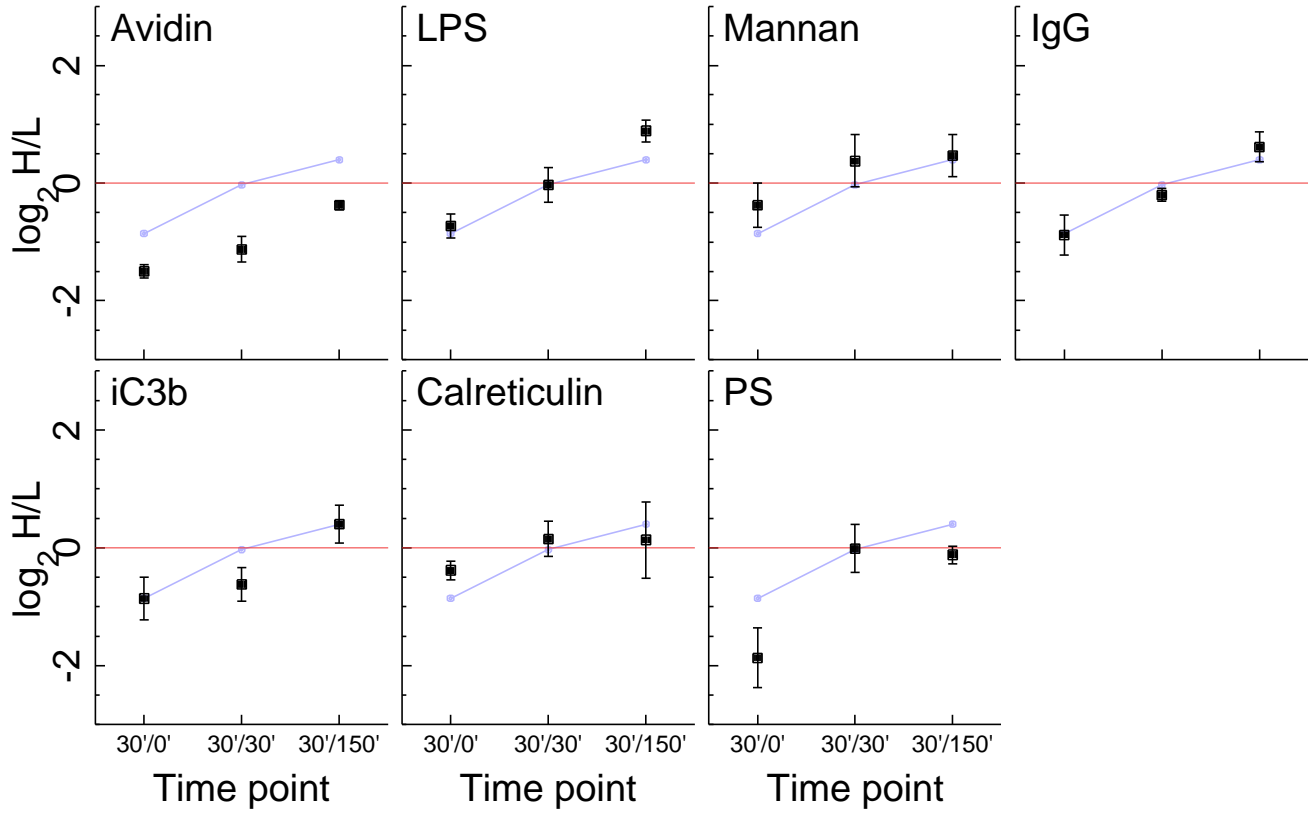



q8k1j5 (Q8K1J5)

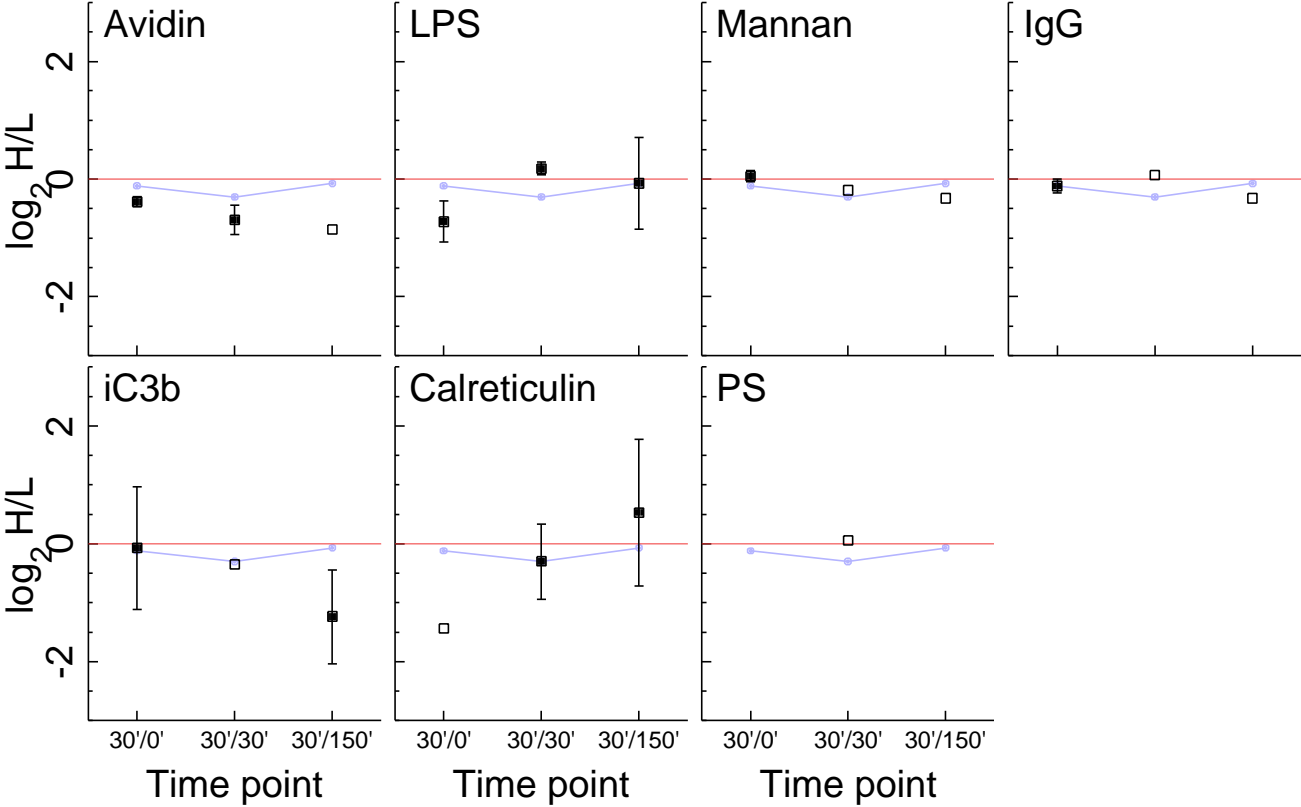

q8r239 (Q8R239)

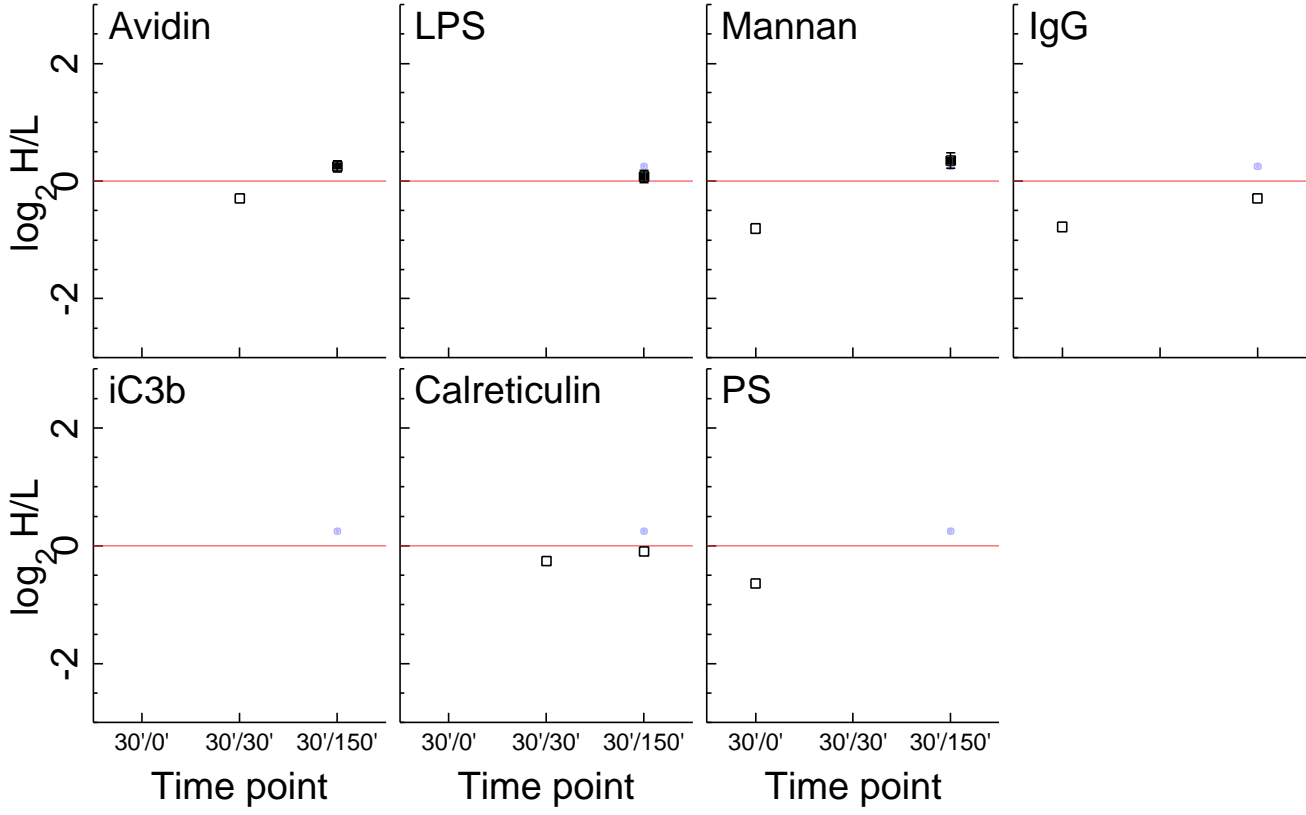

q8ve96 (Q8VE96)

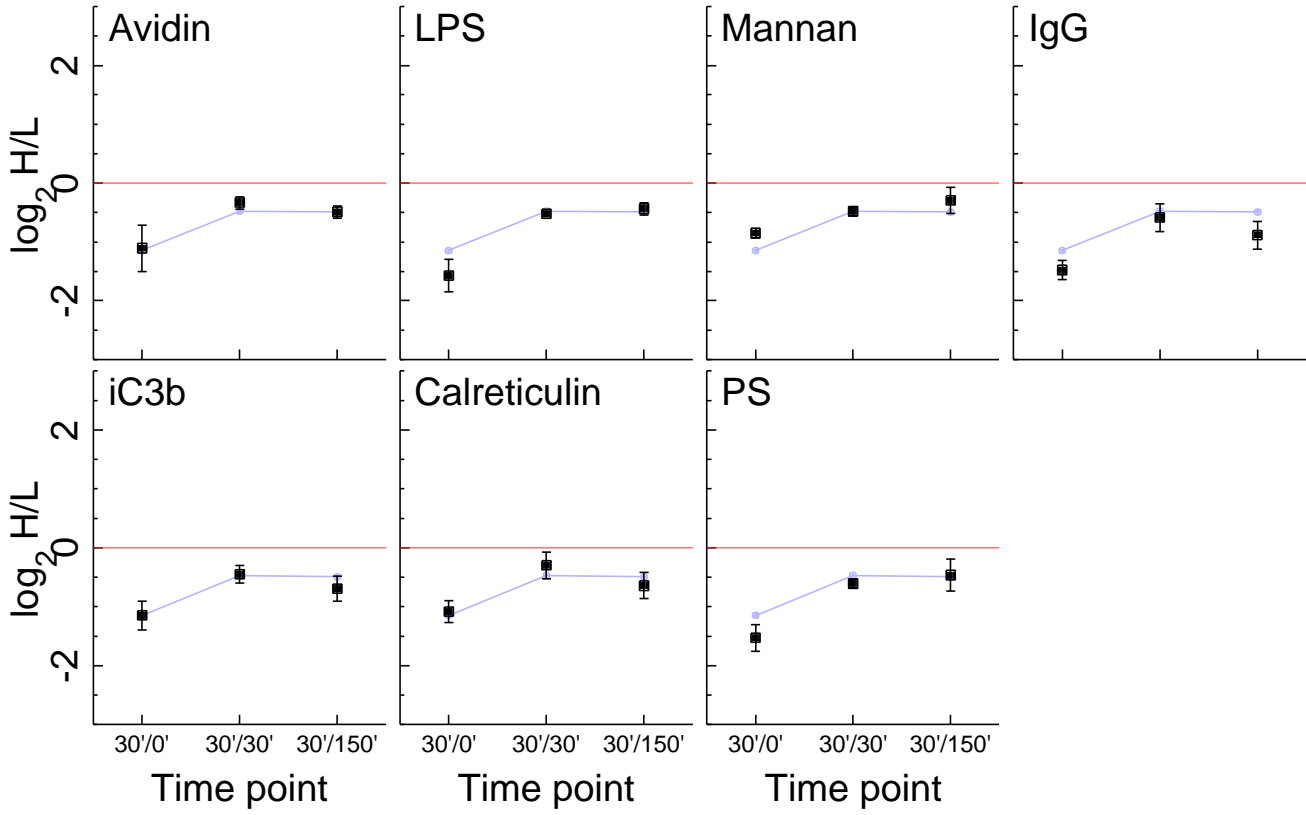

### q91zu6-5 (Q91ZU6)

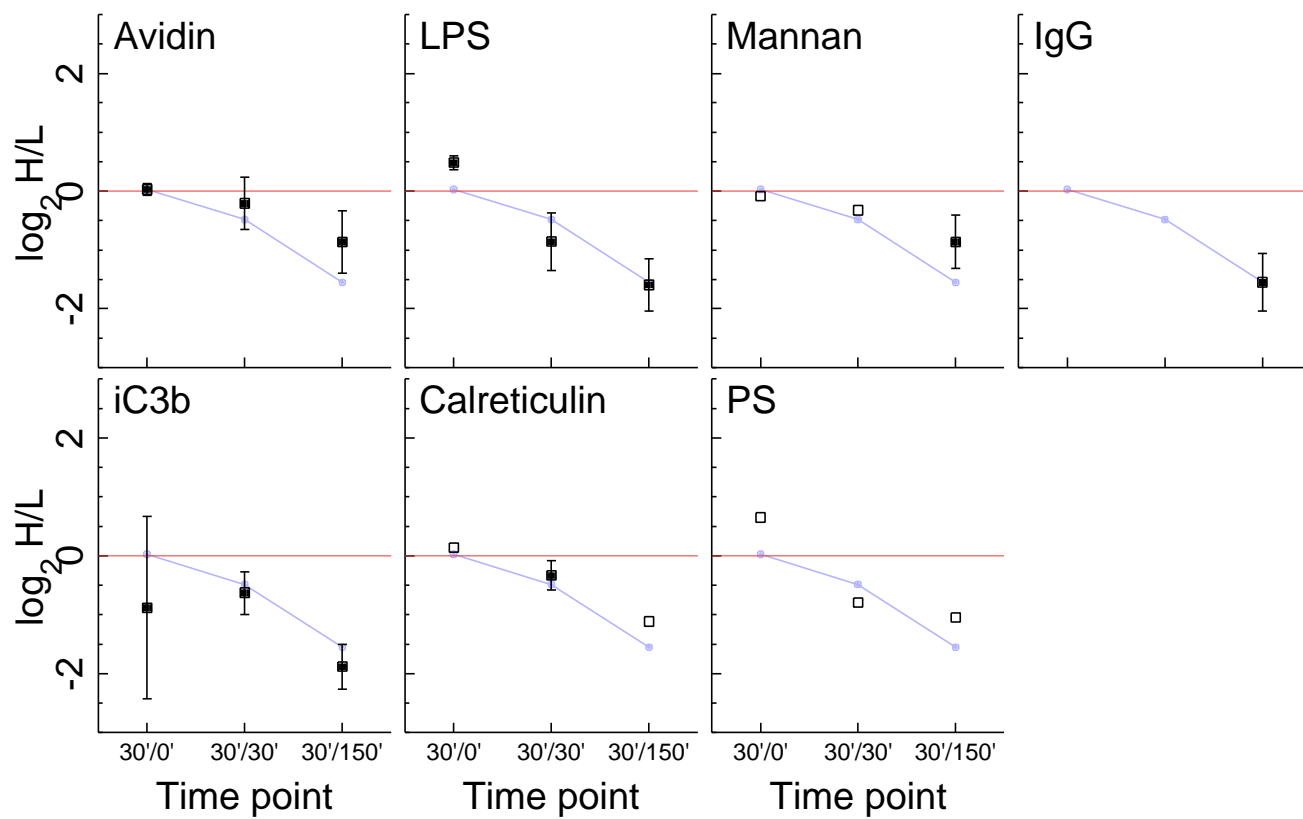

### q9crc6 (Q9CRC6)

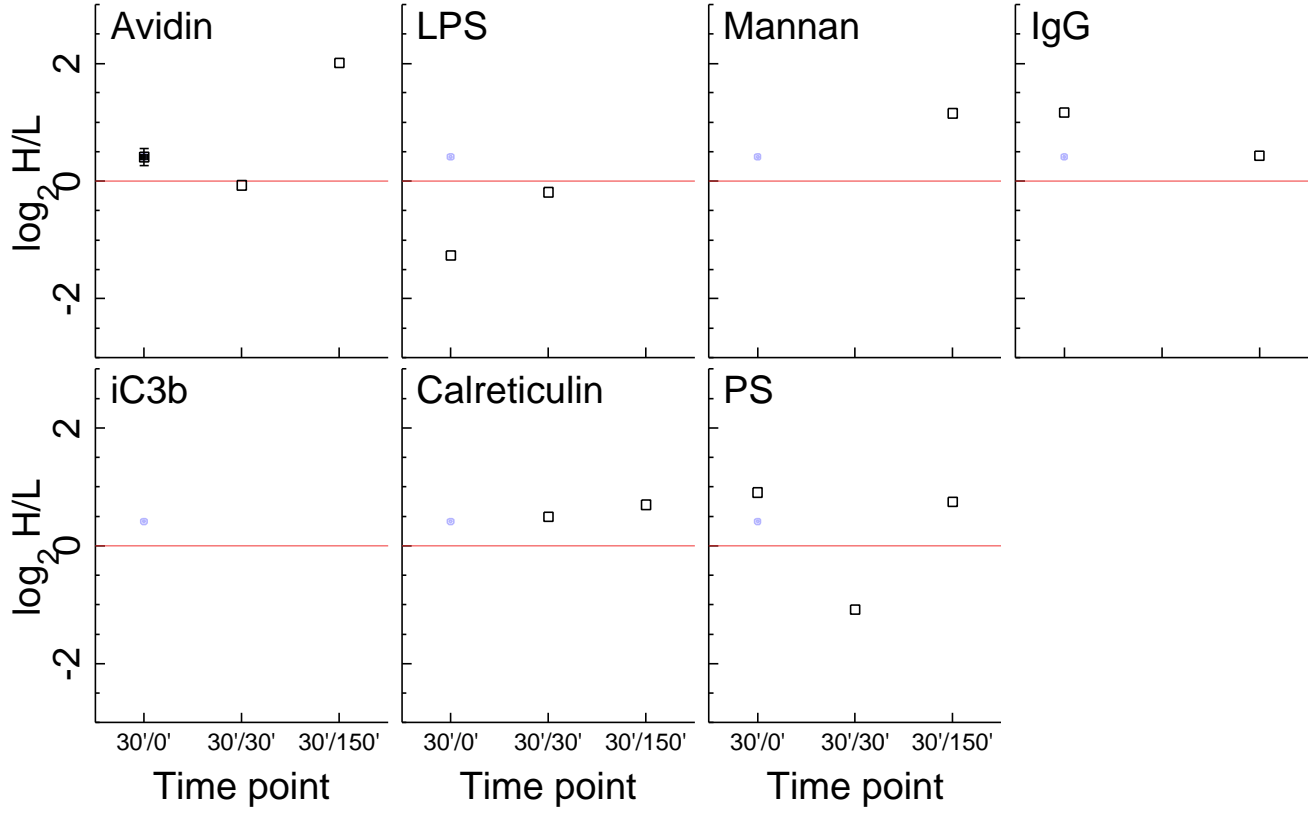

q9d0b6 (Q9D0B6)

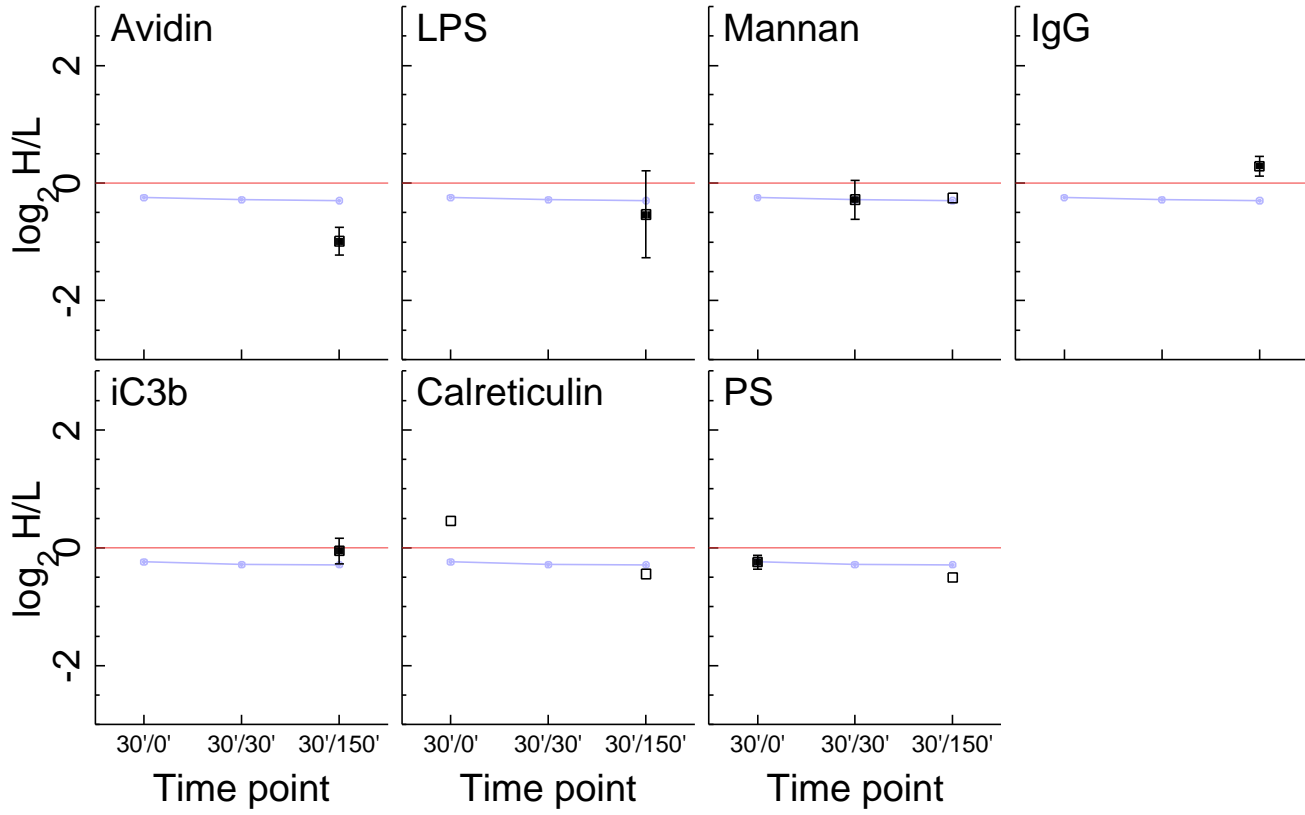

q9d6w8 (Q9D6W8)

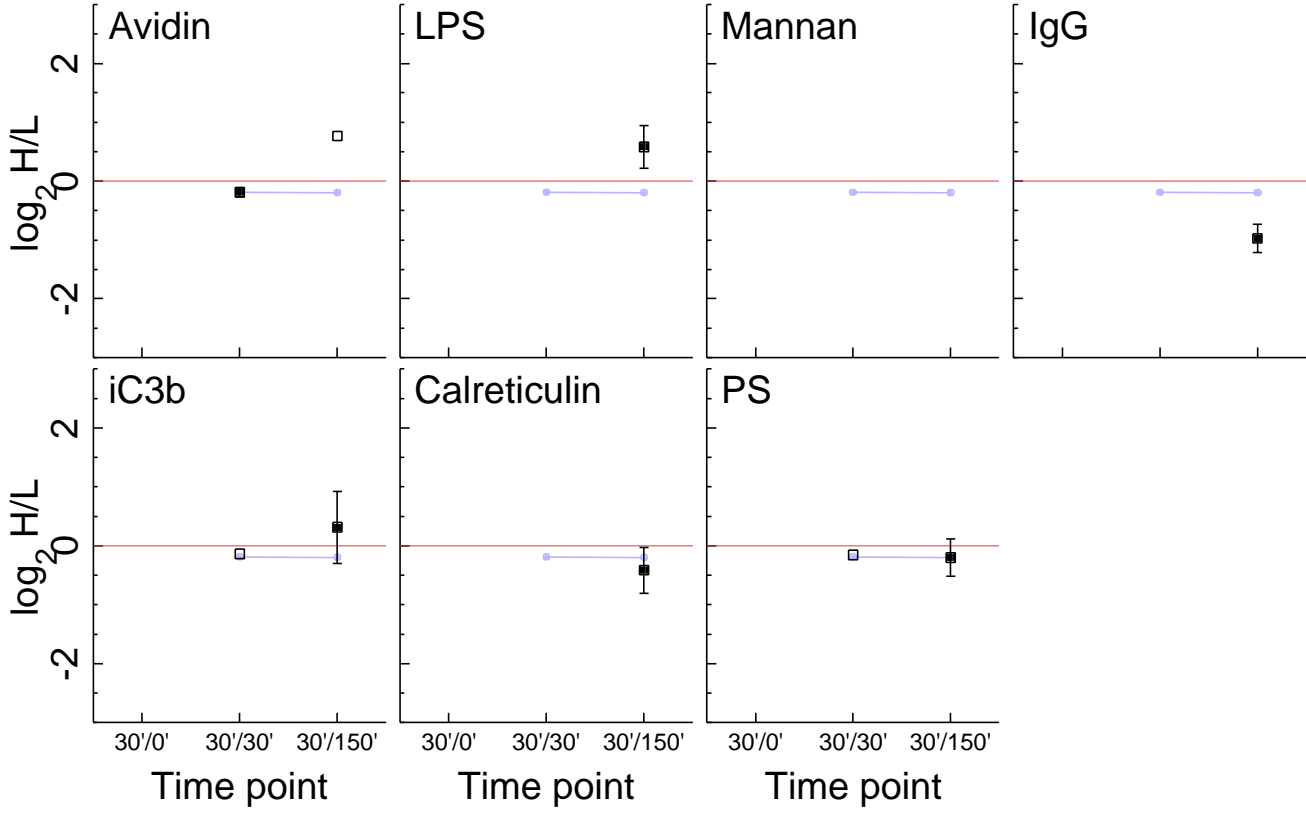

q9d735 (Q9D735)

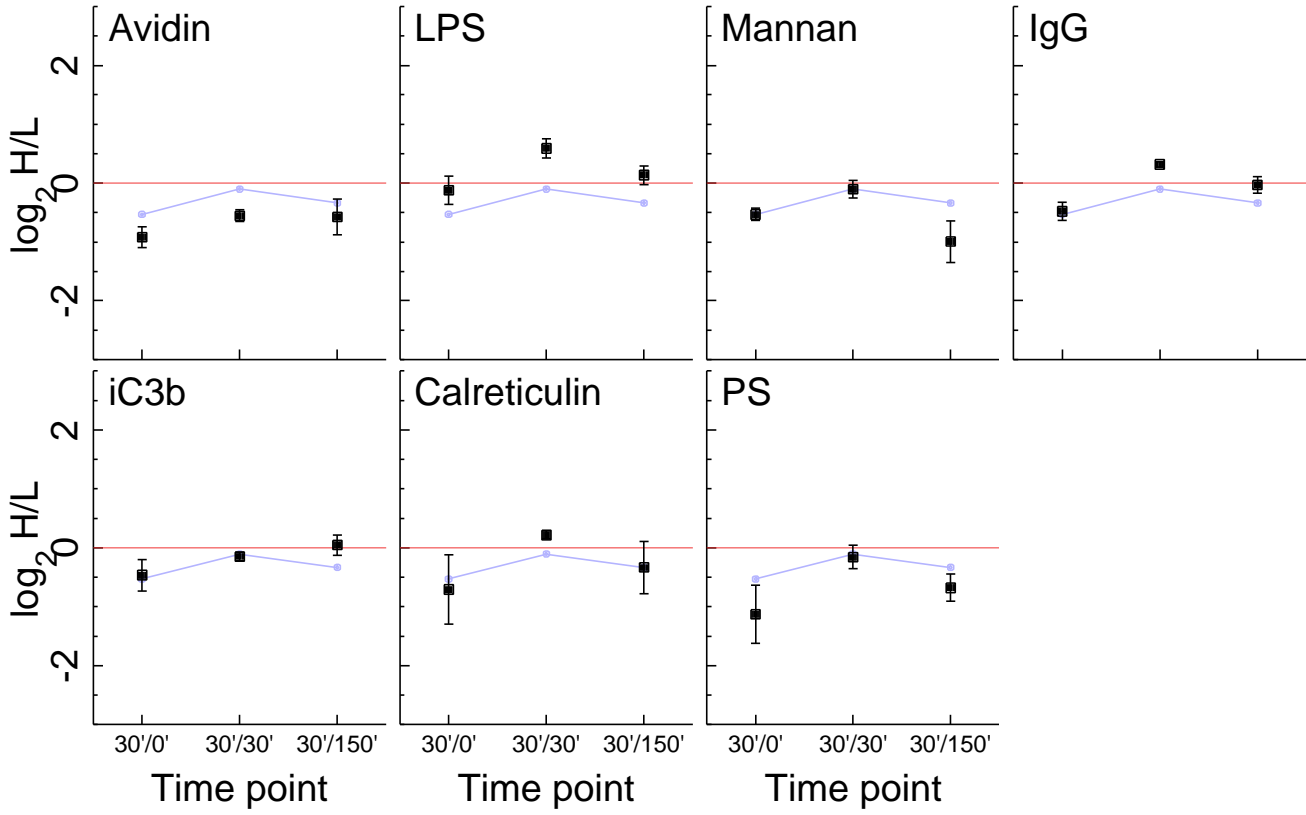



### q9dam7 (Q9DAM7)

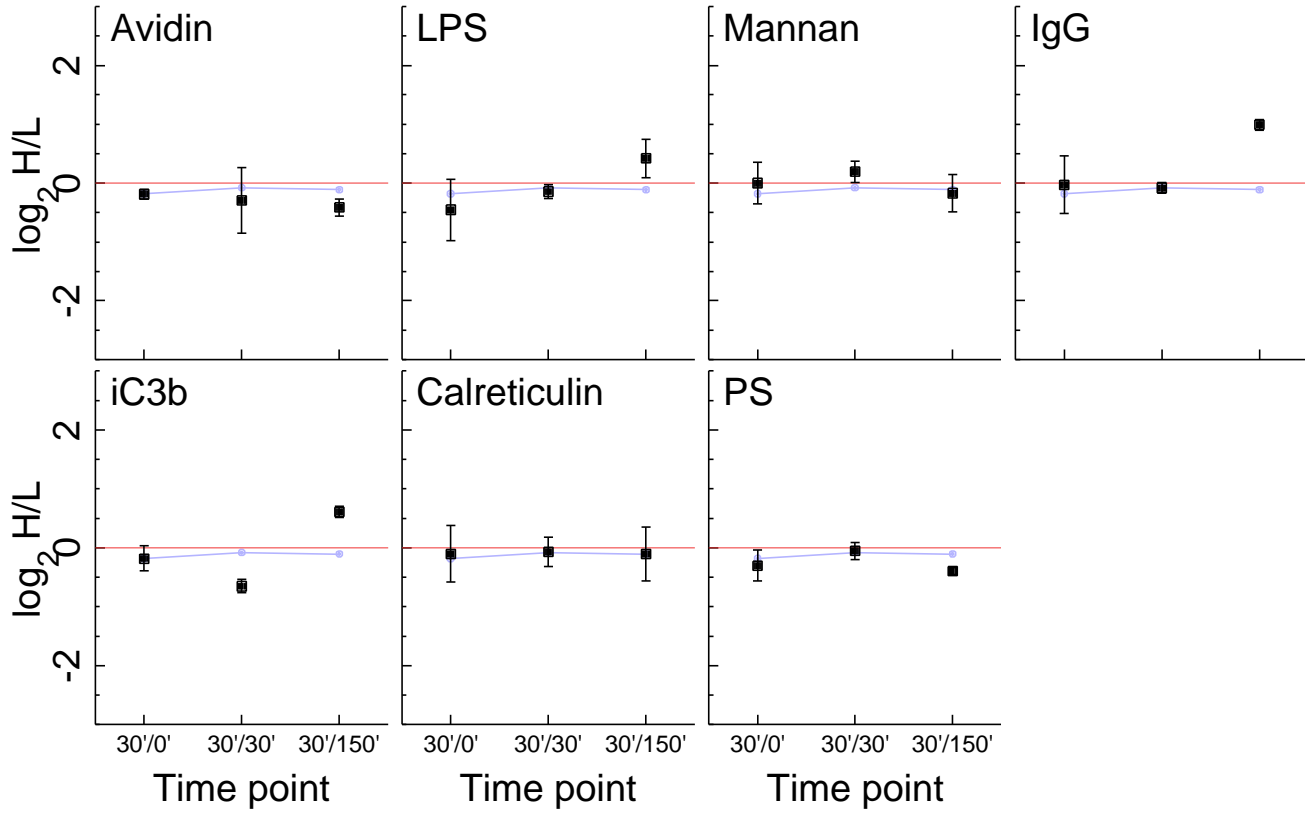

### q9es97-3 (Q9ES97)

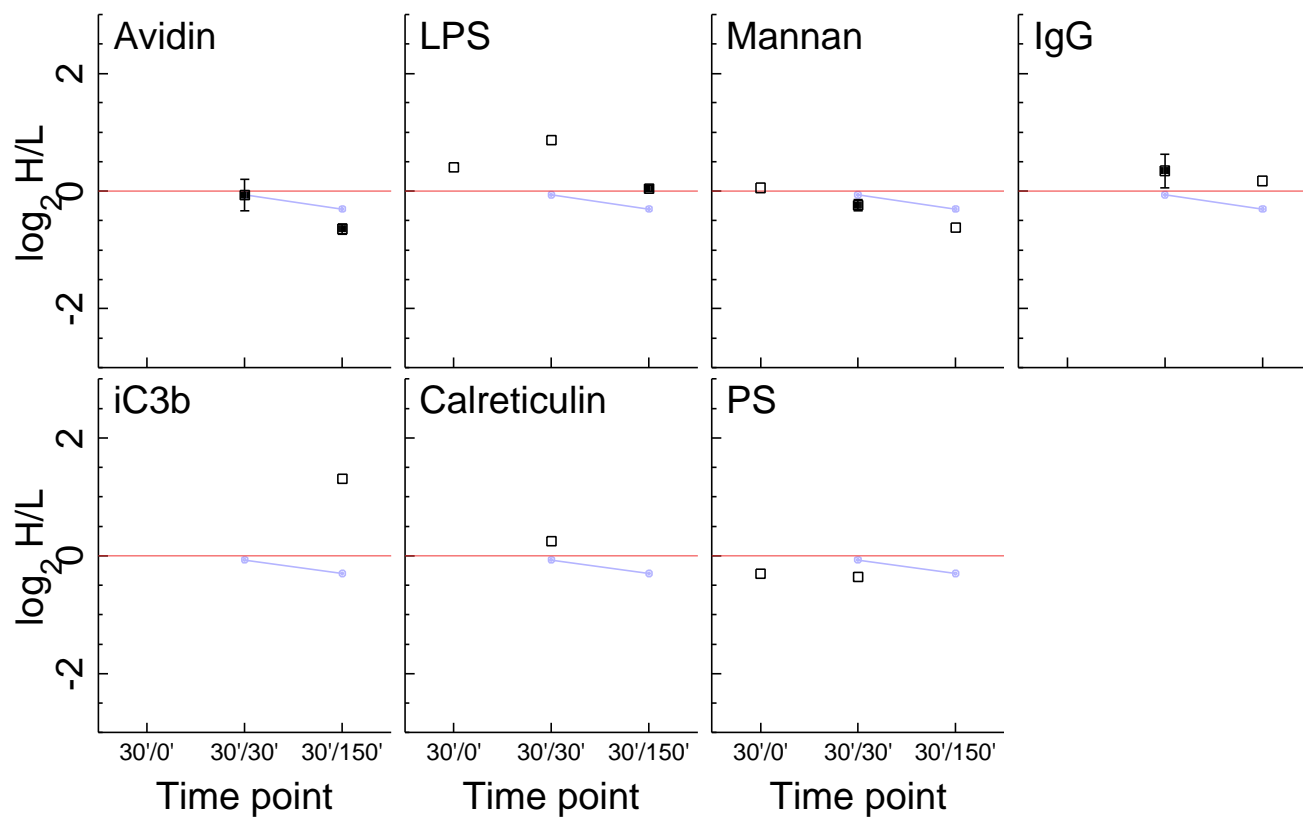

qki (Q9QYS9)

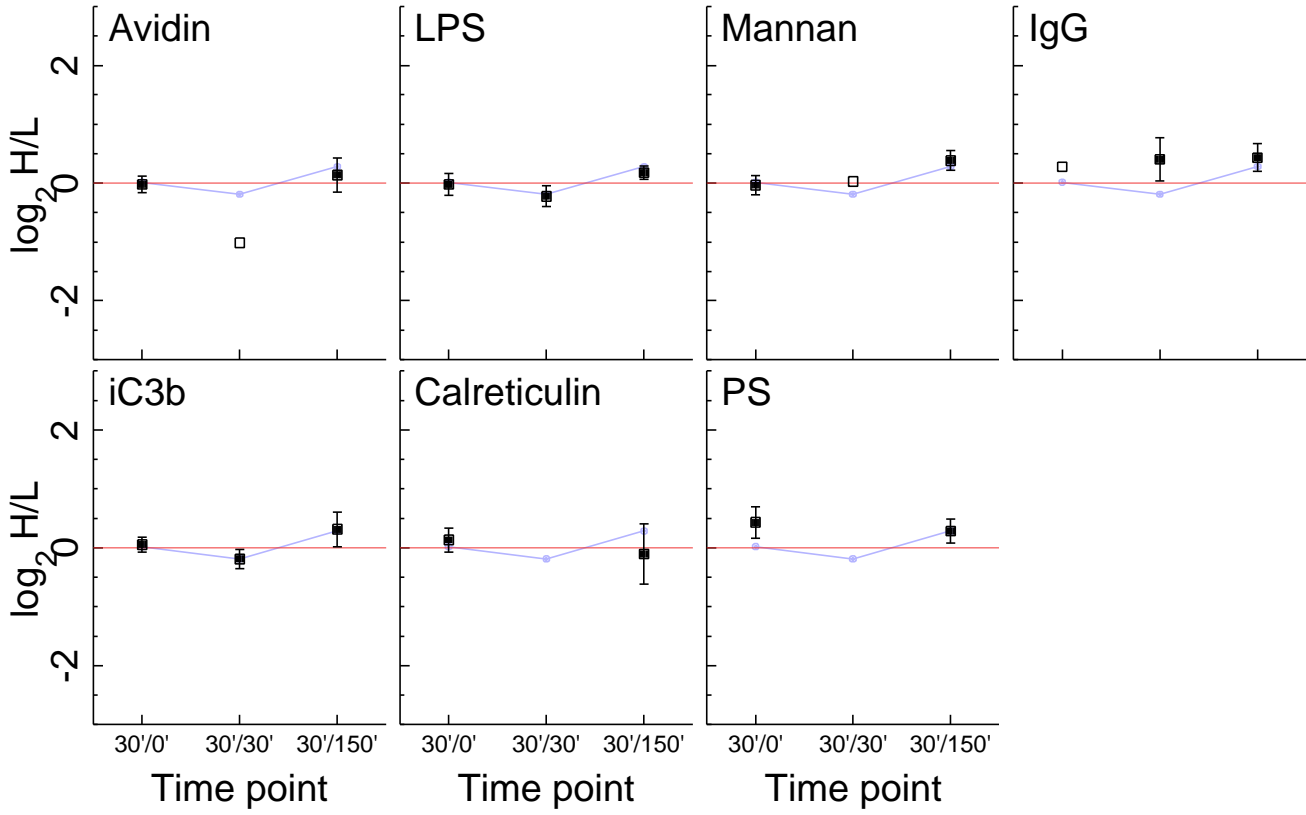

rab10 (P61027)

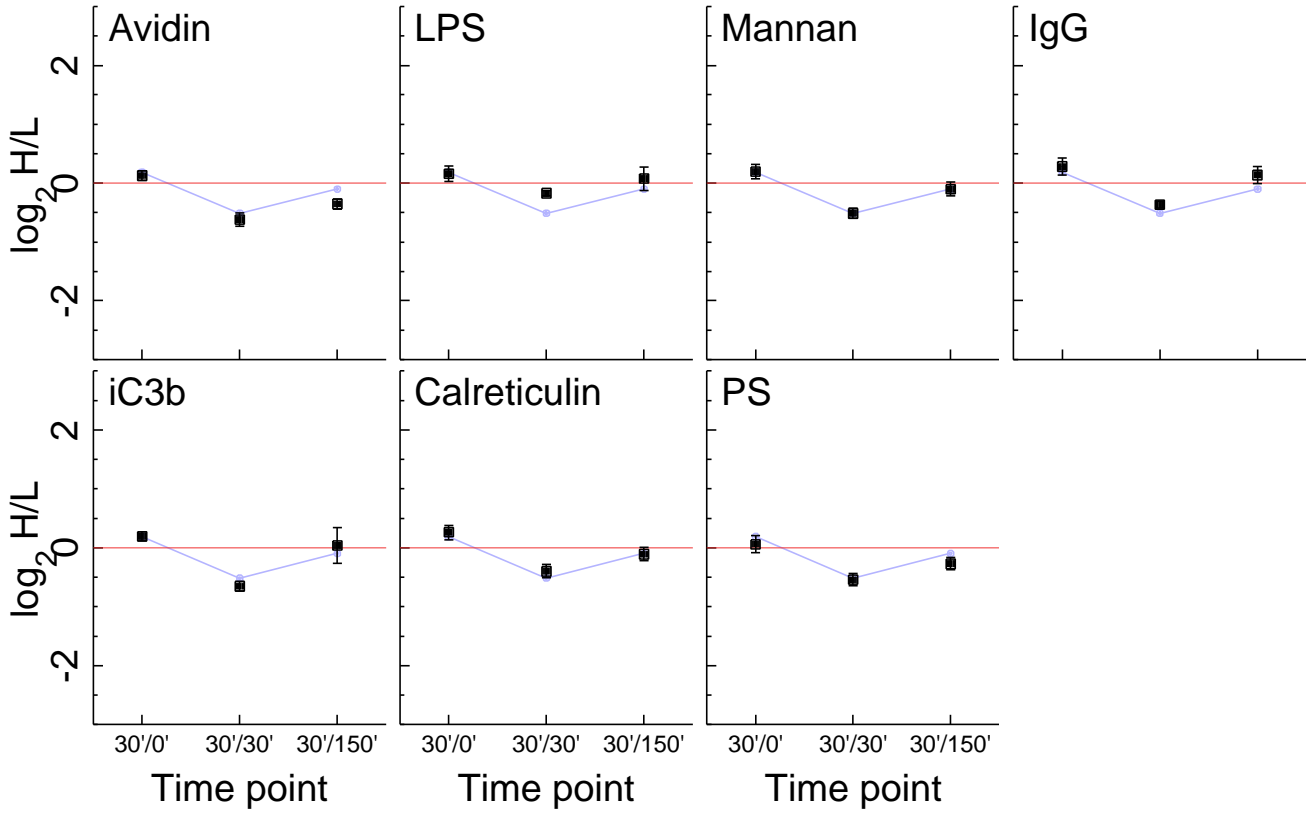

rab11a (P62492)

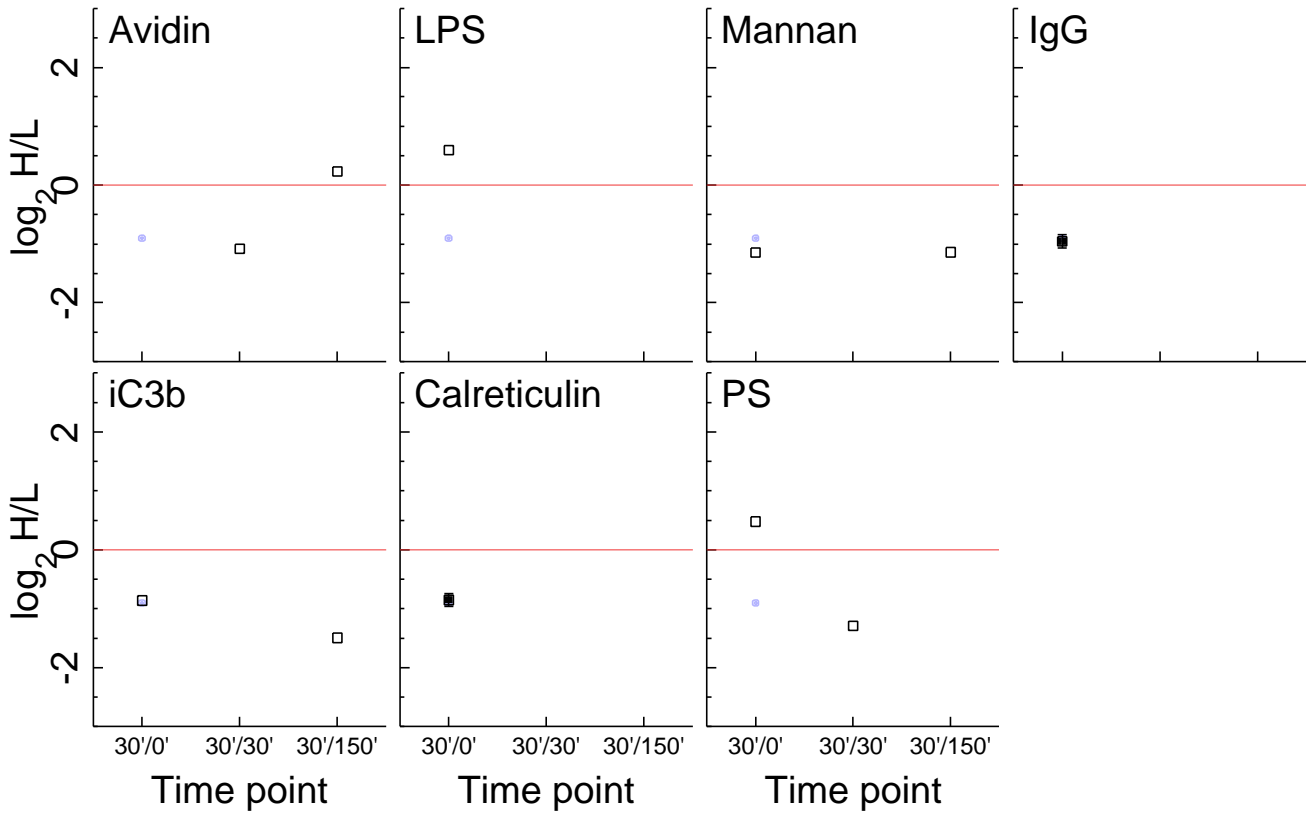

rab11b (P46638)

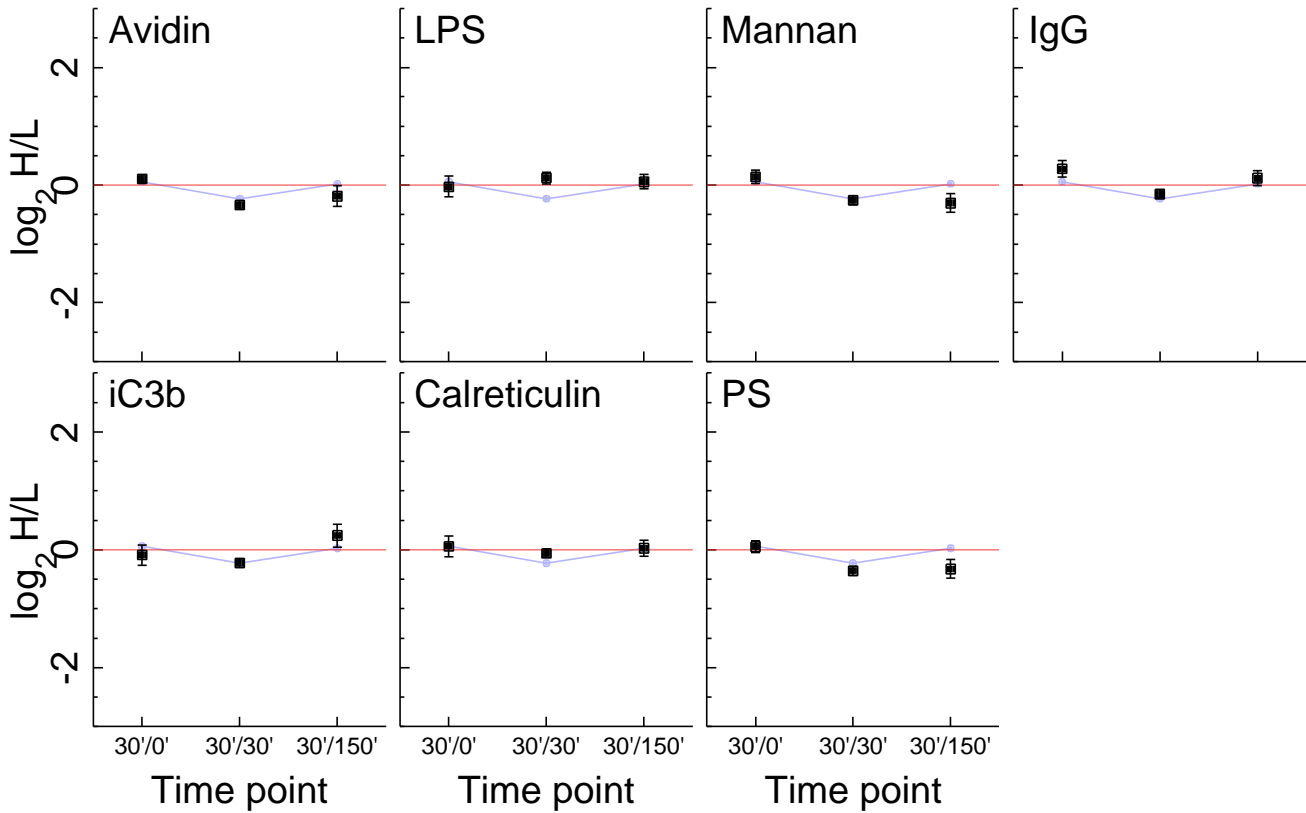

### rab11fip5 (Q8R361)

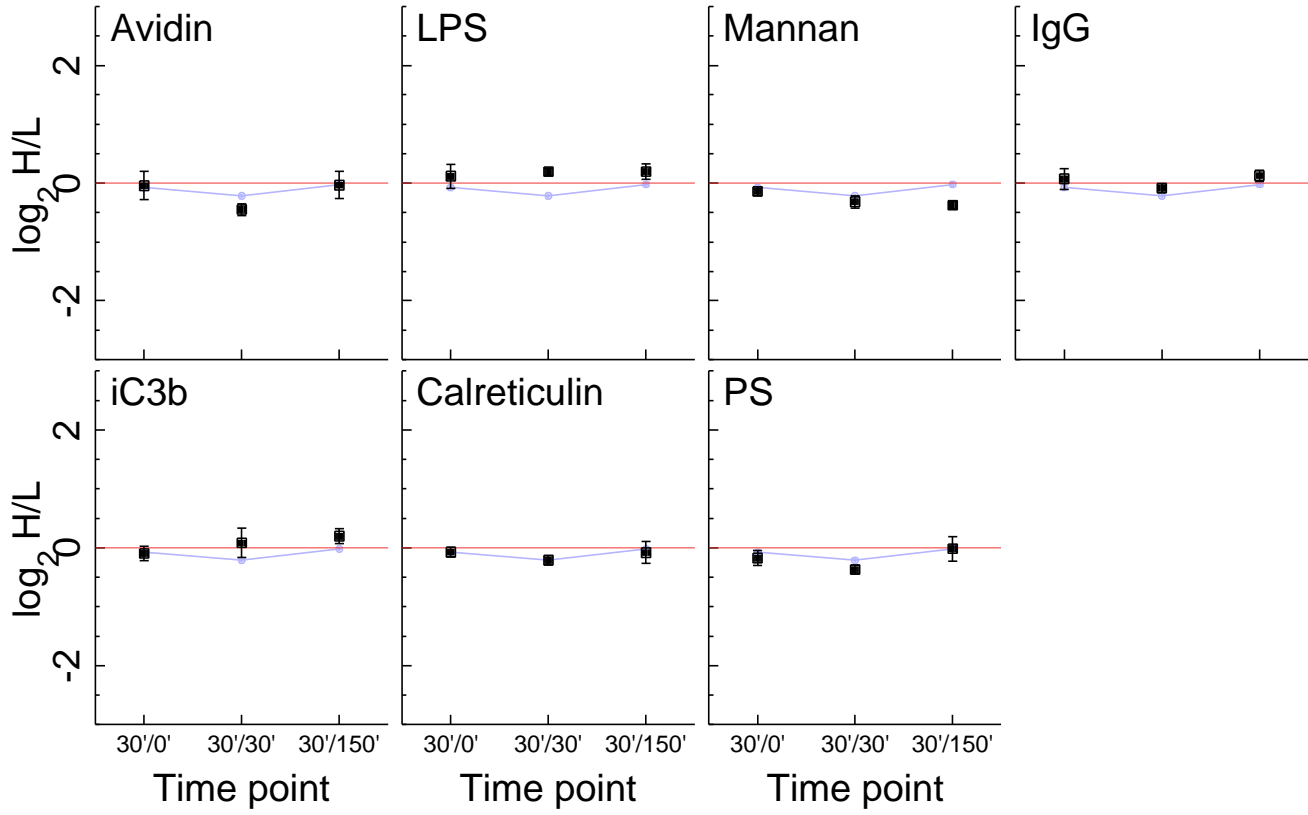

### rab12 (A2CG35)

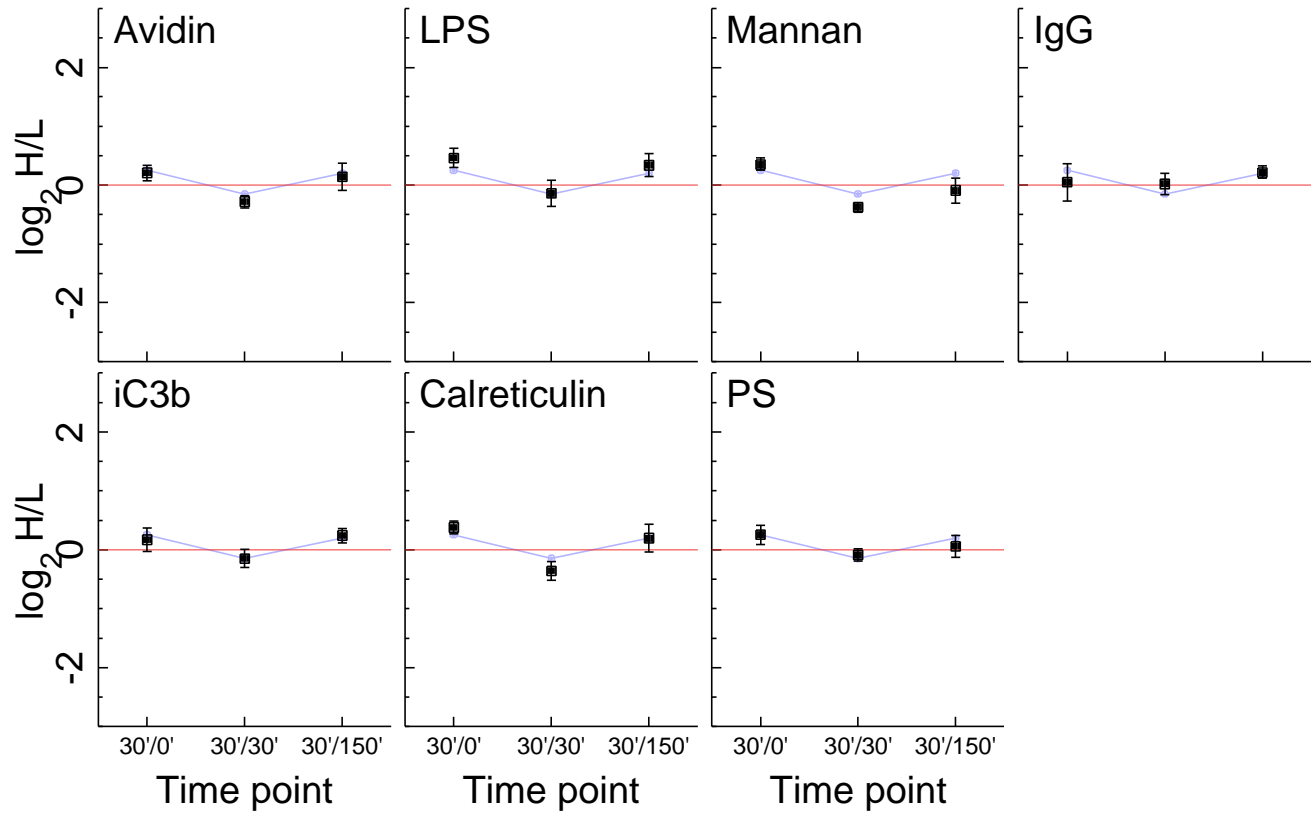



### rab13 (Q9DD03)

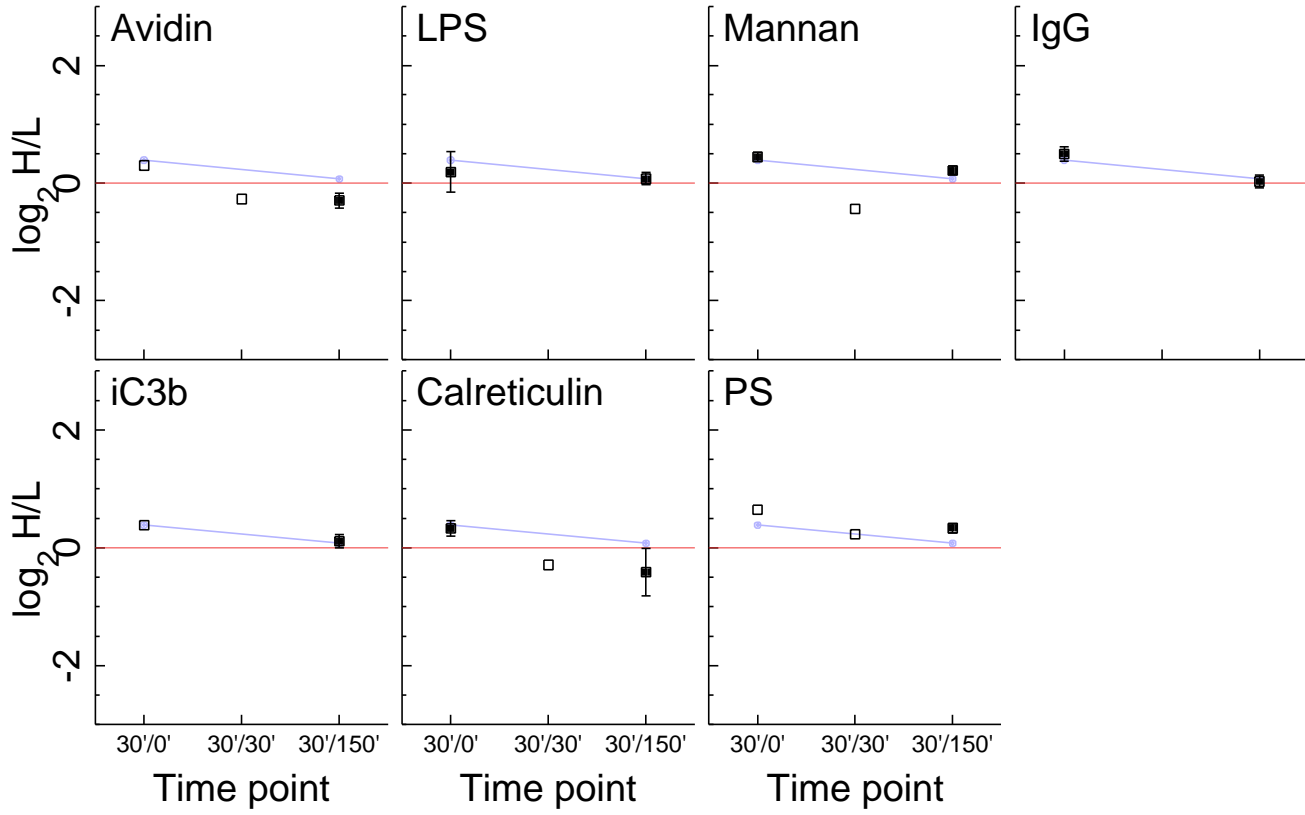

### rab14 (Q91V41)

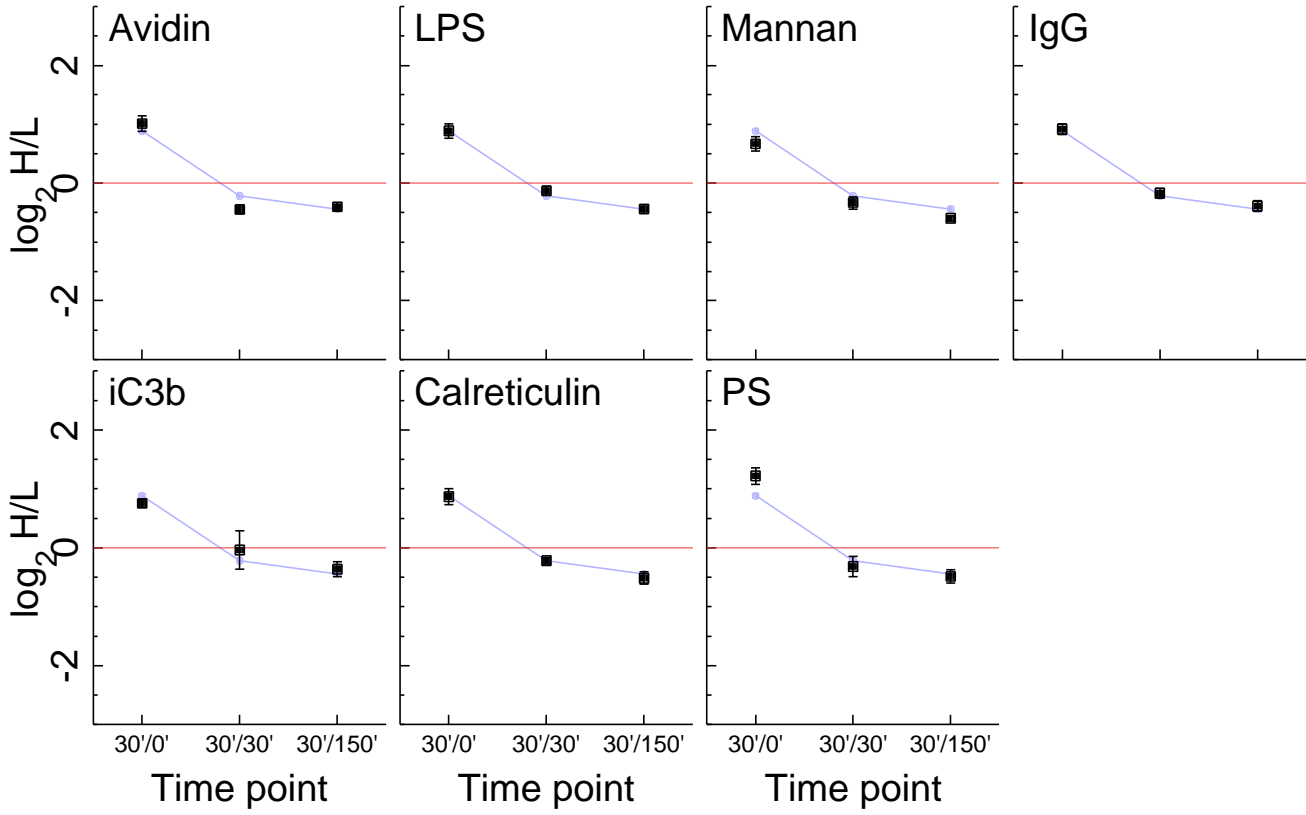

rab18 (P35293)

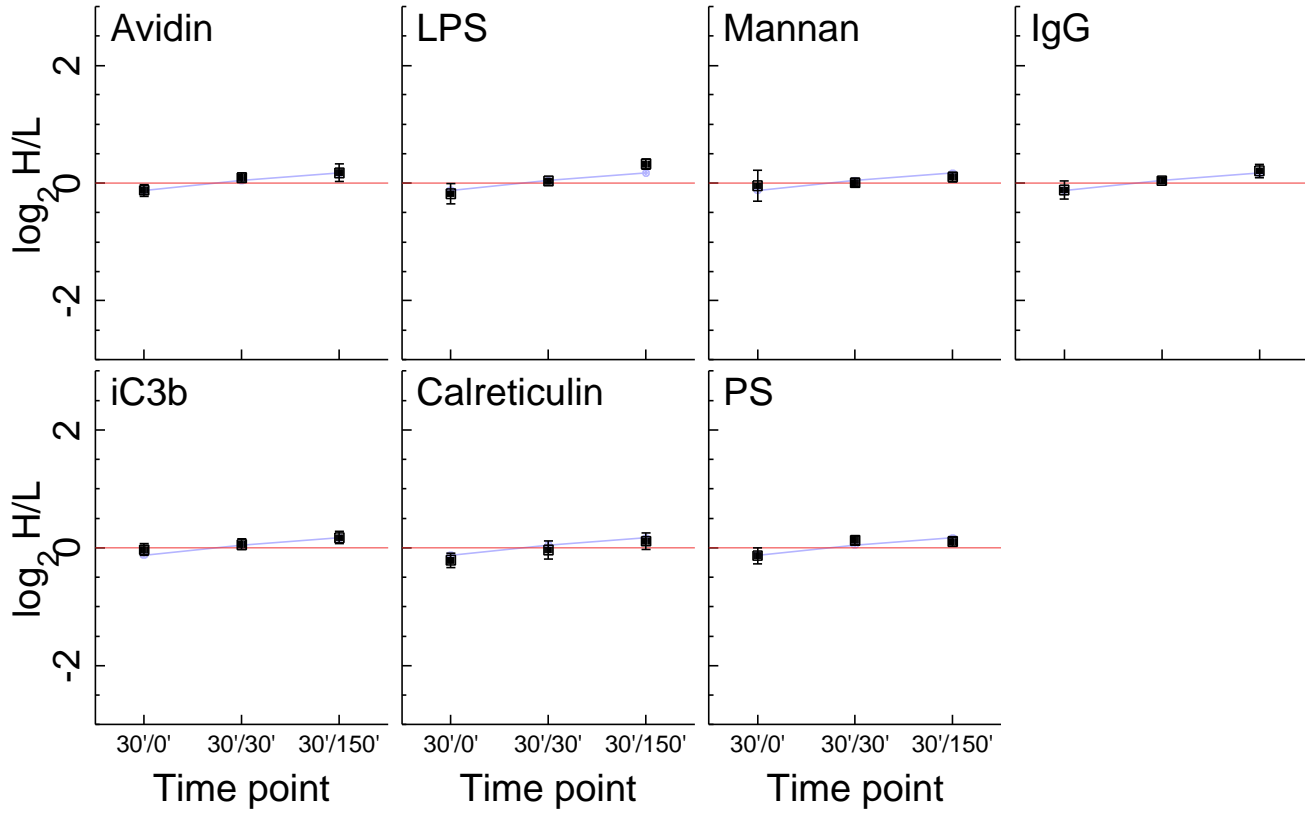

rab19 (P35294)

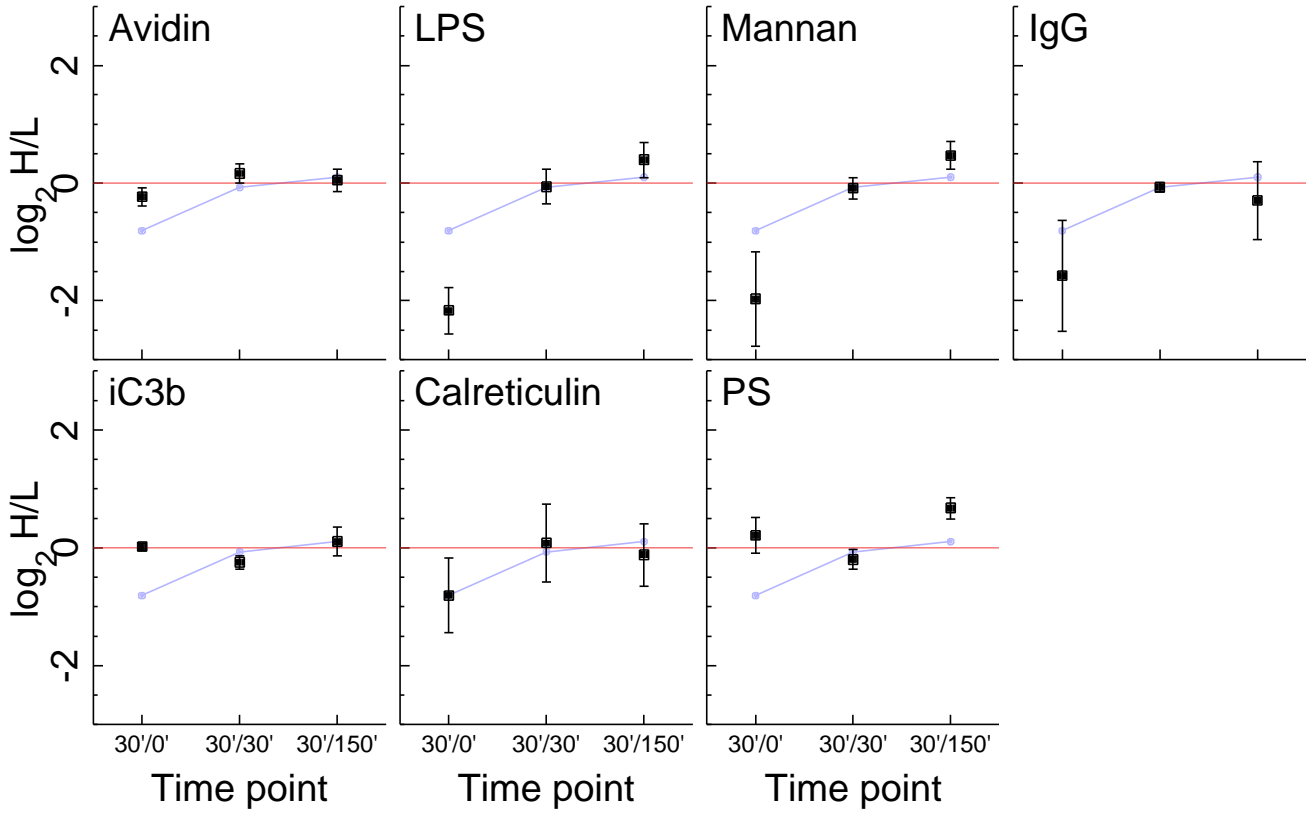

### rab1a (P62821)

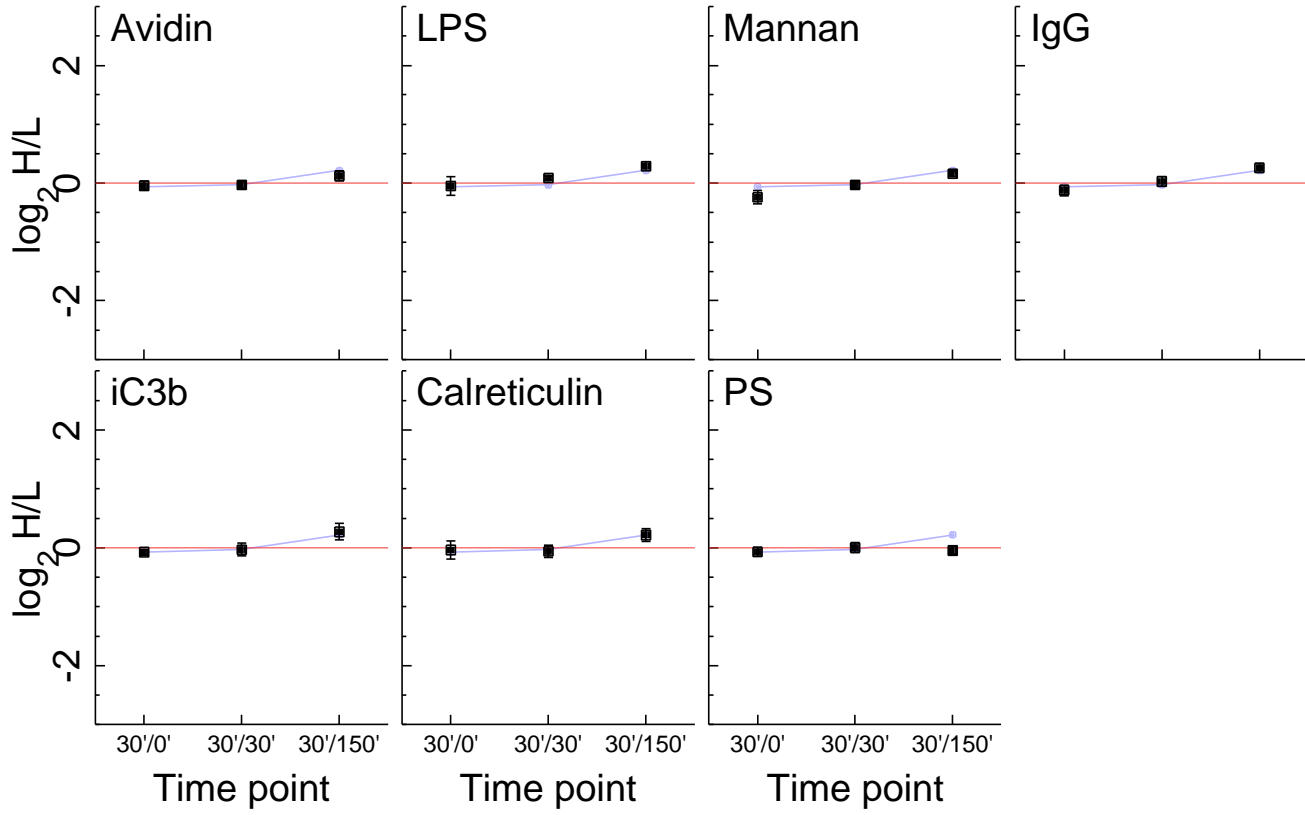

### rab1b (Q9D1G1)

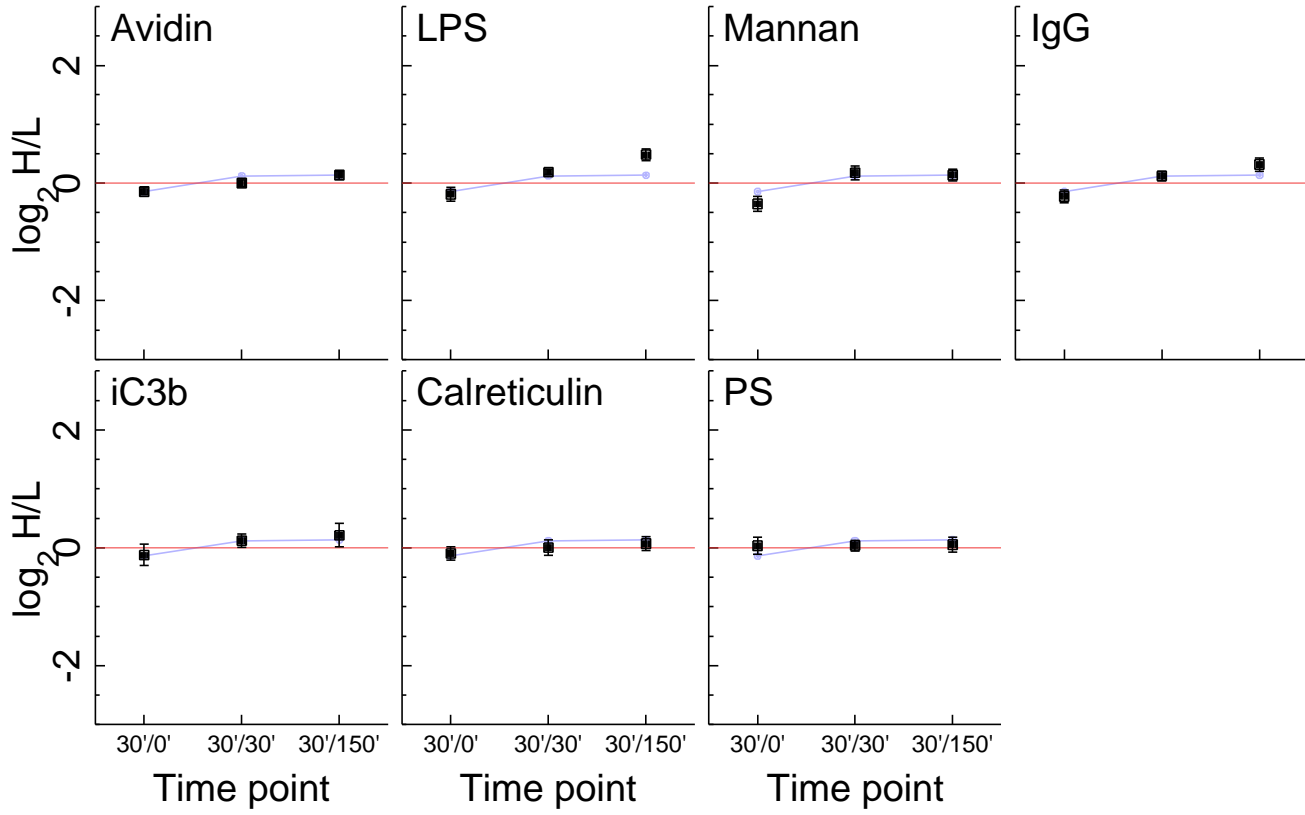

rab21 (P35282)

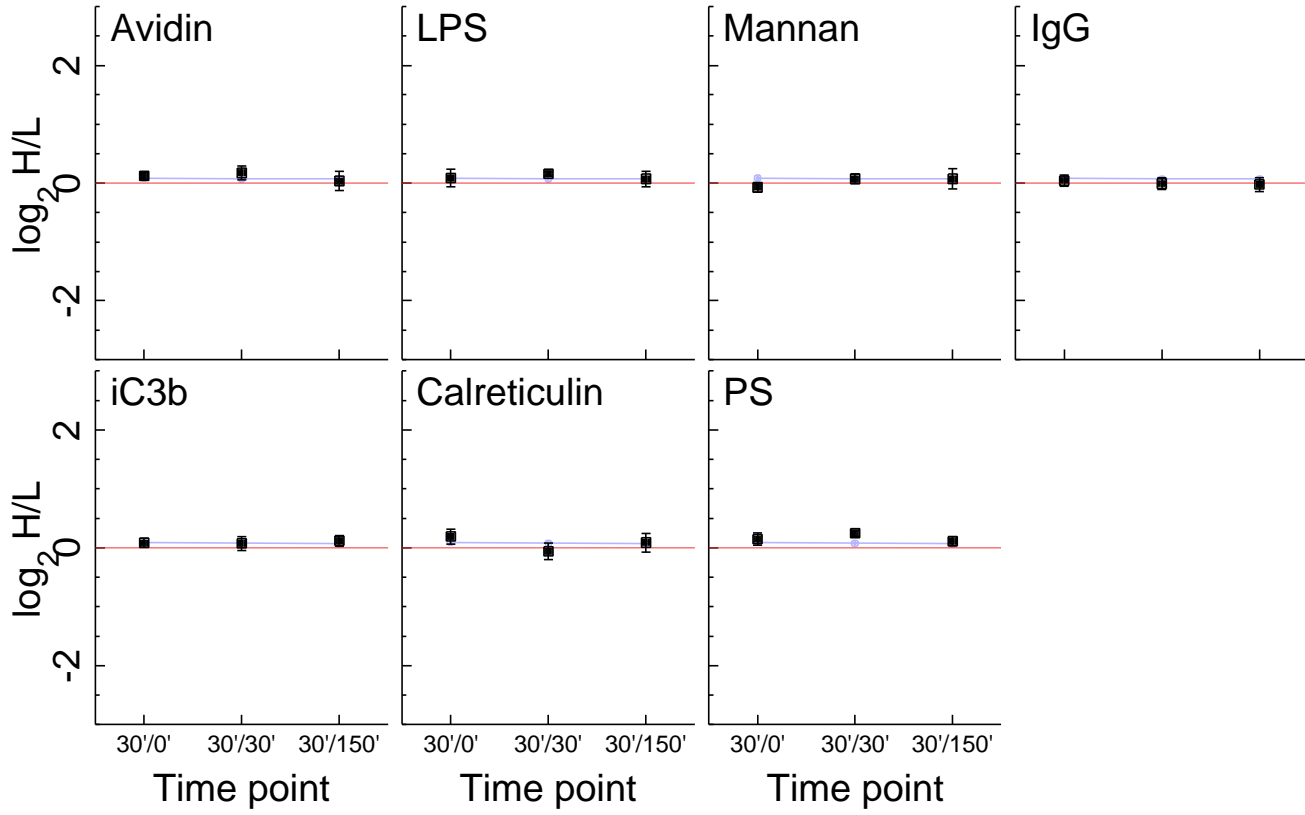

rab22a (P35285)

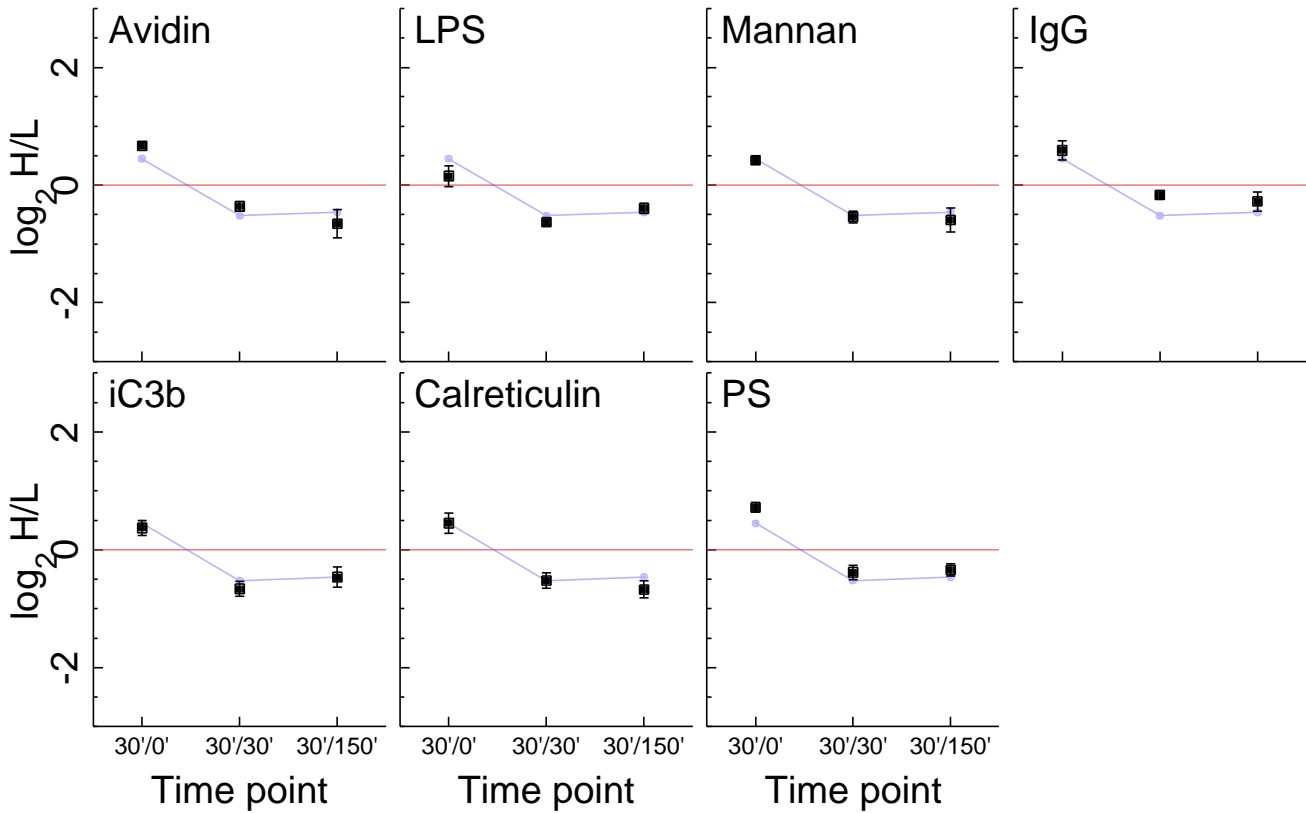



rab23 (P35288)

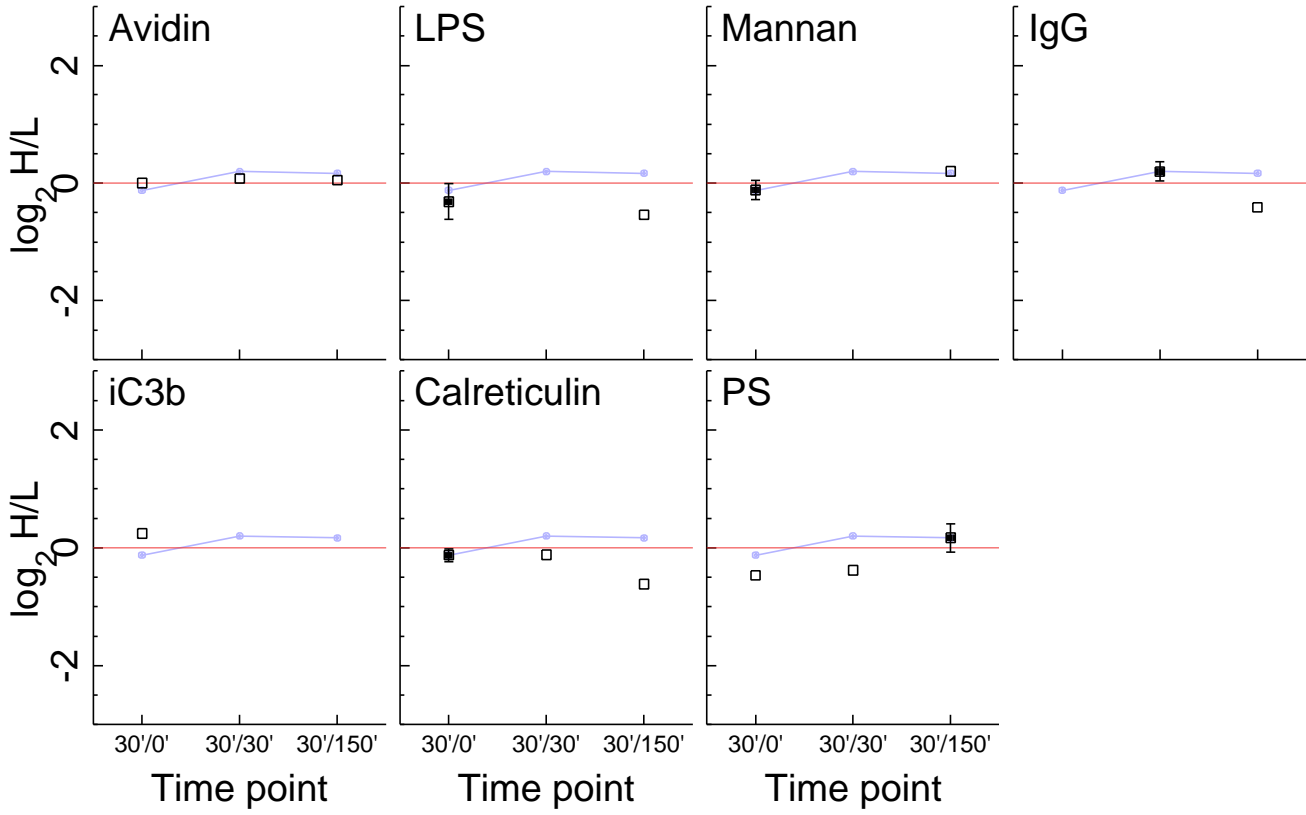

rab27a (Q9ERI2)

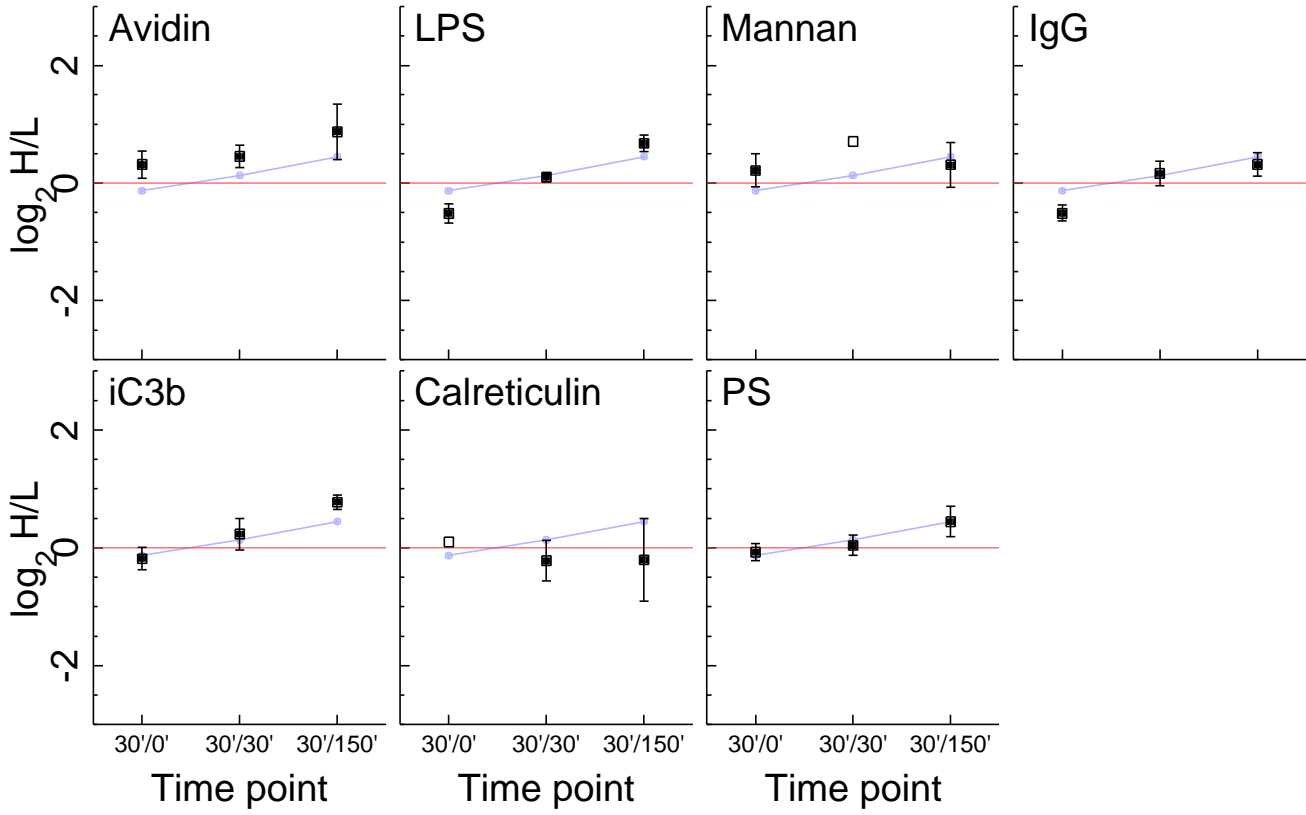

### rab2a (P53994)

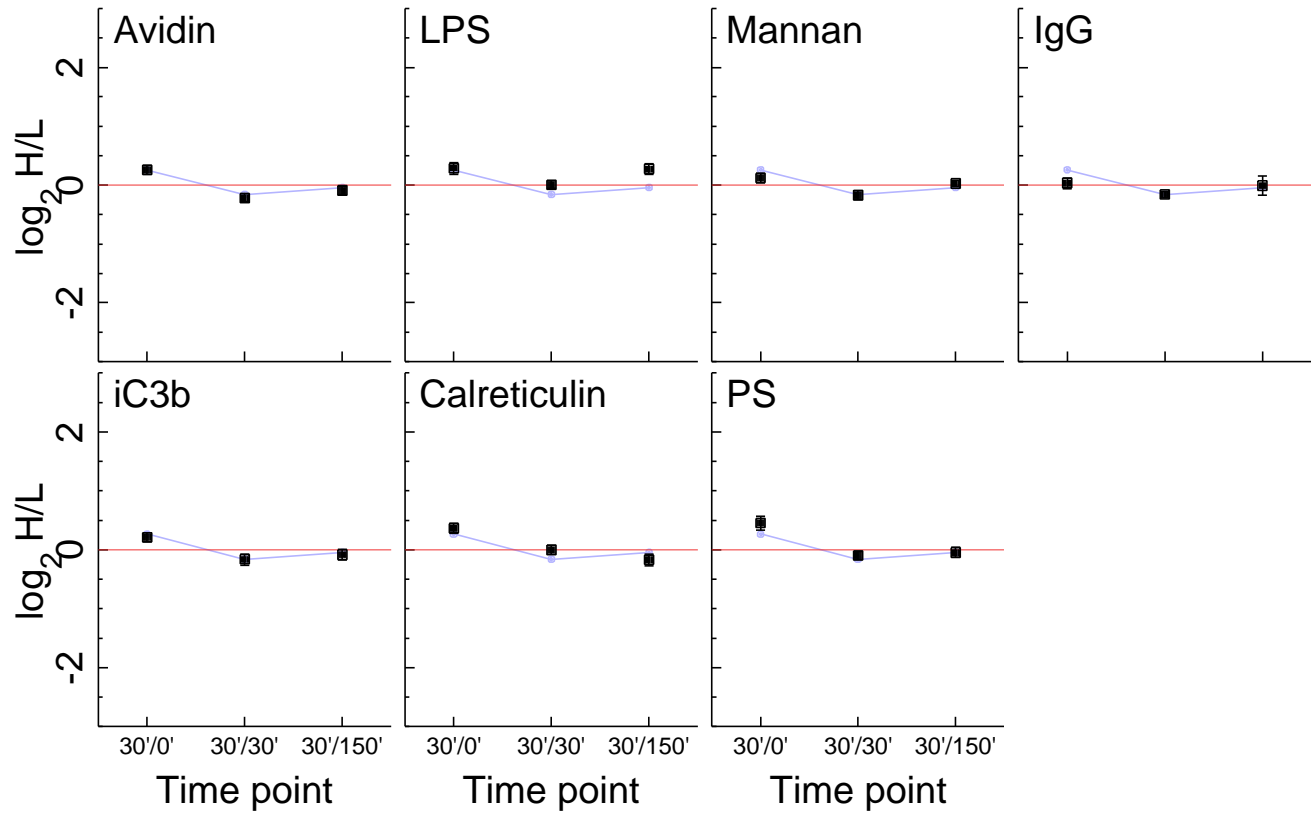

### rab31 (Q3TXV4)

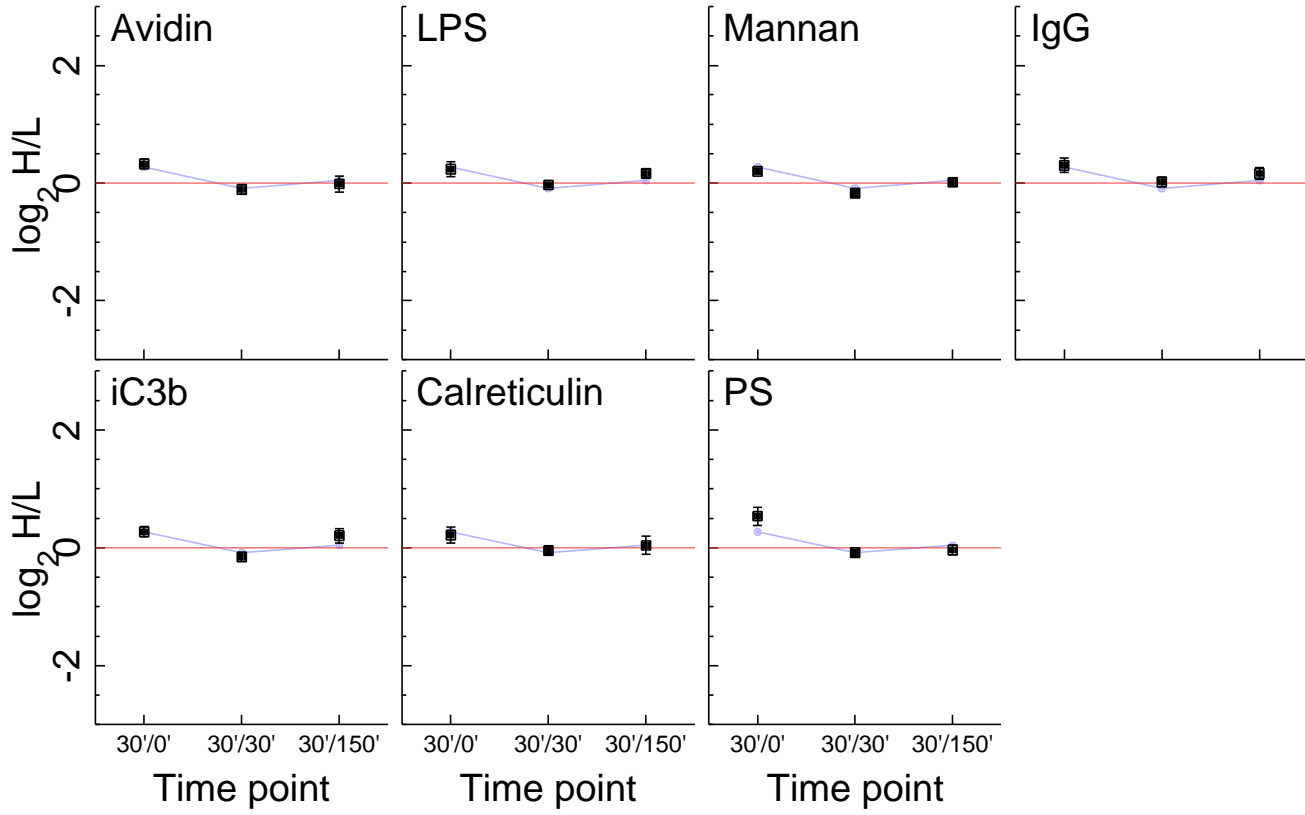

### rab32 (Q9CZE3)

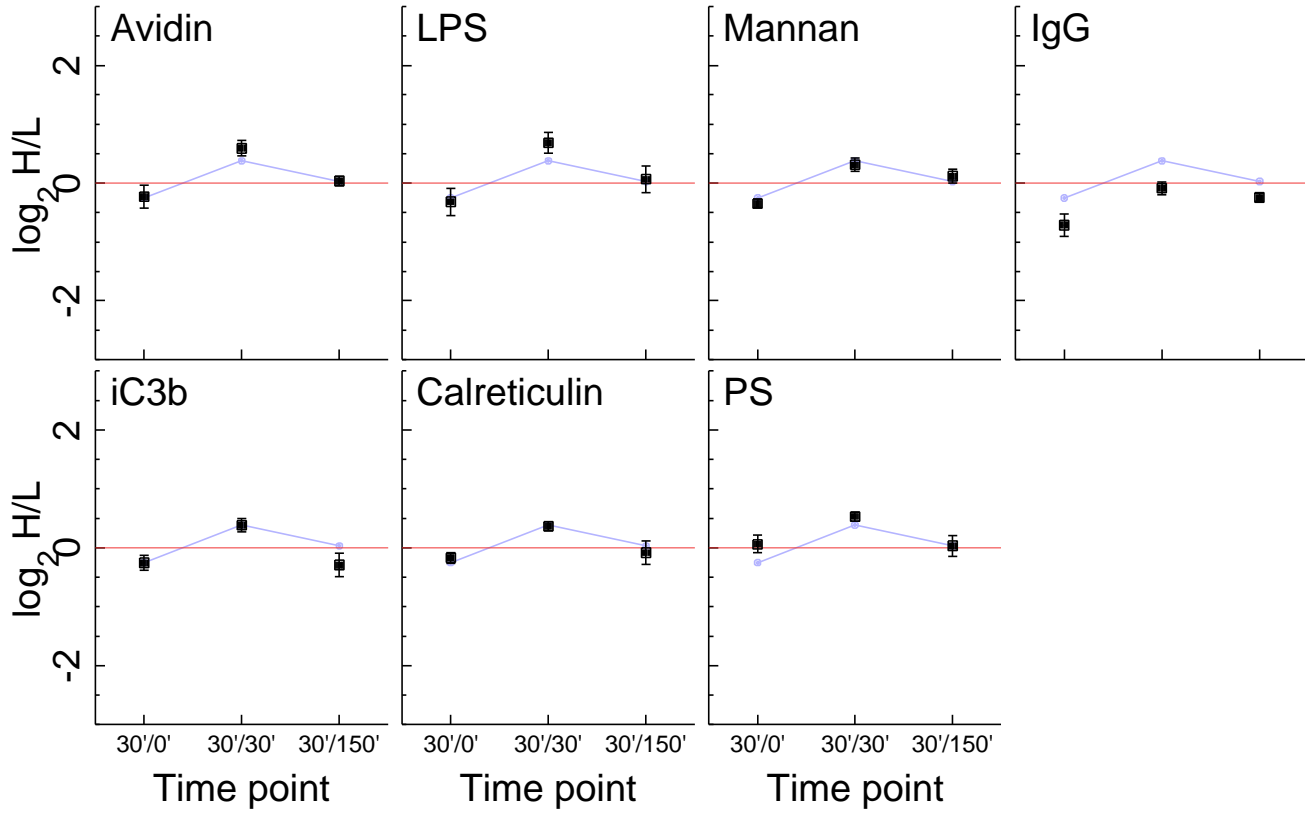

rab33b (O35963)

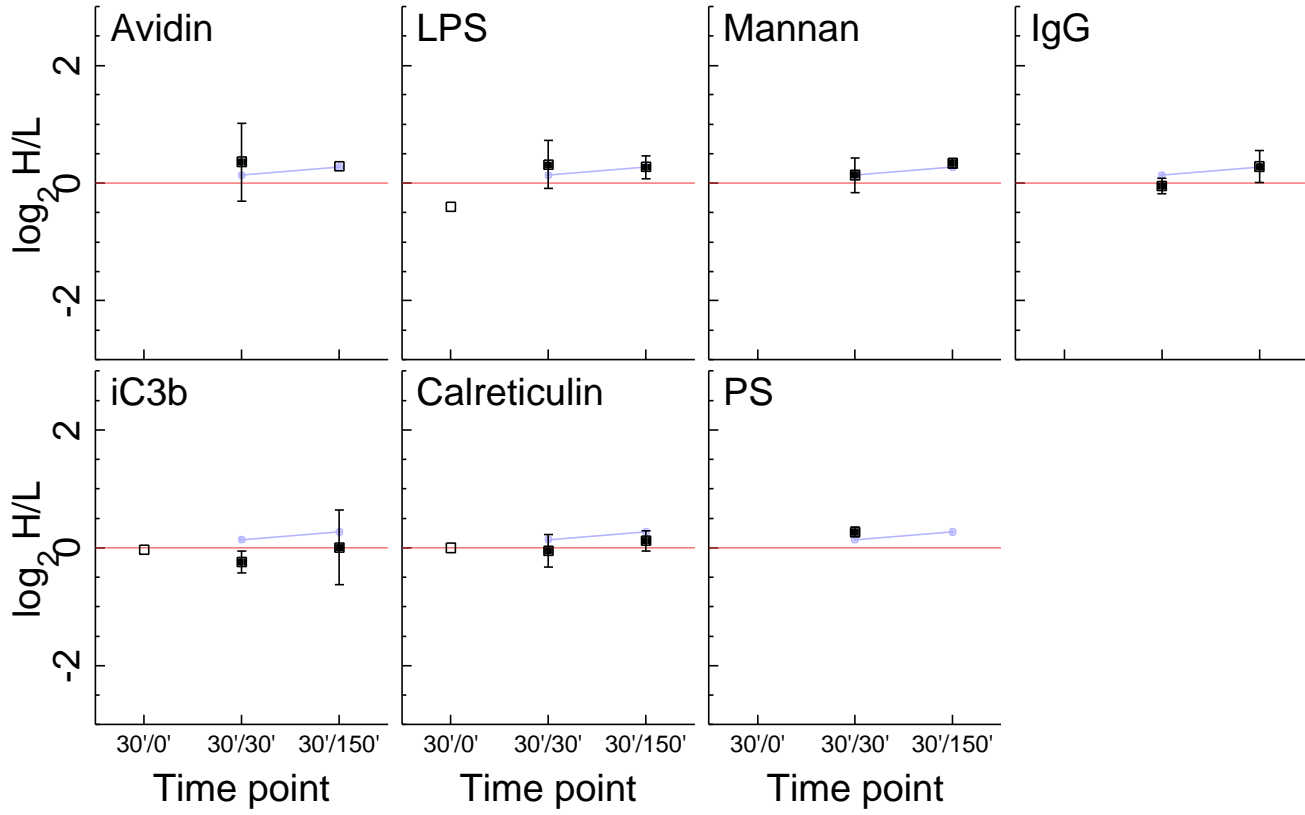

### rab34 (B1AQD4)

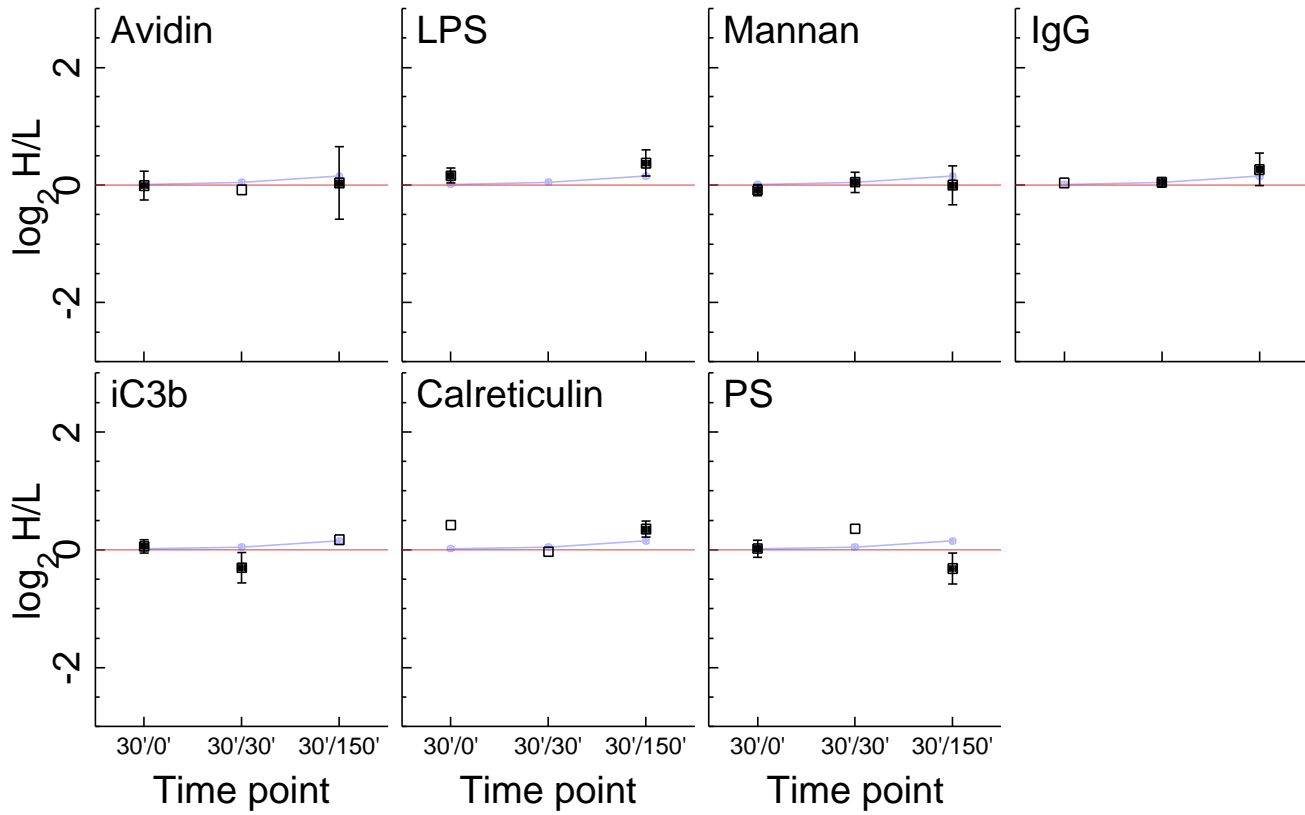

rab35 (Q6PHN9)

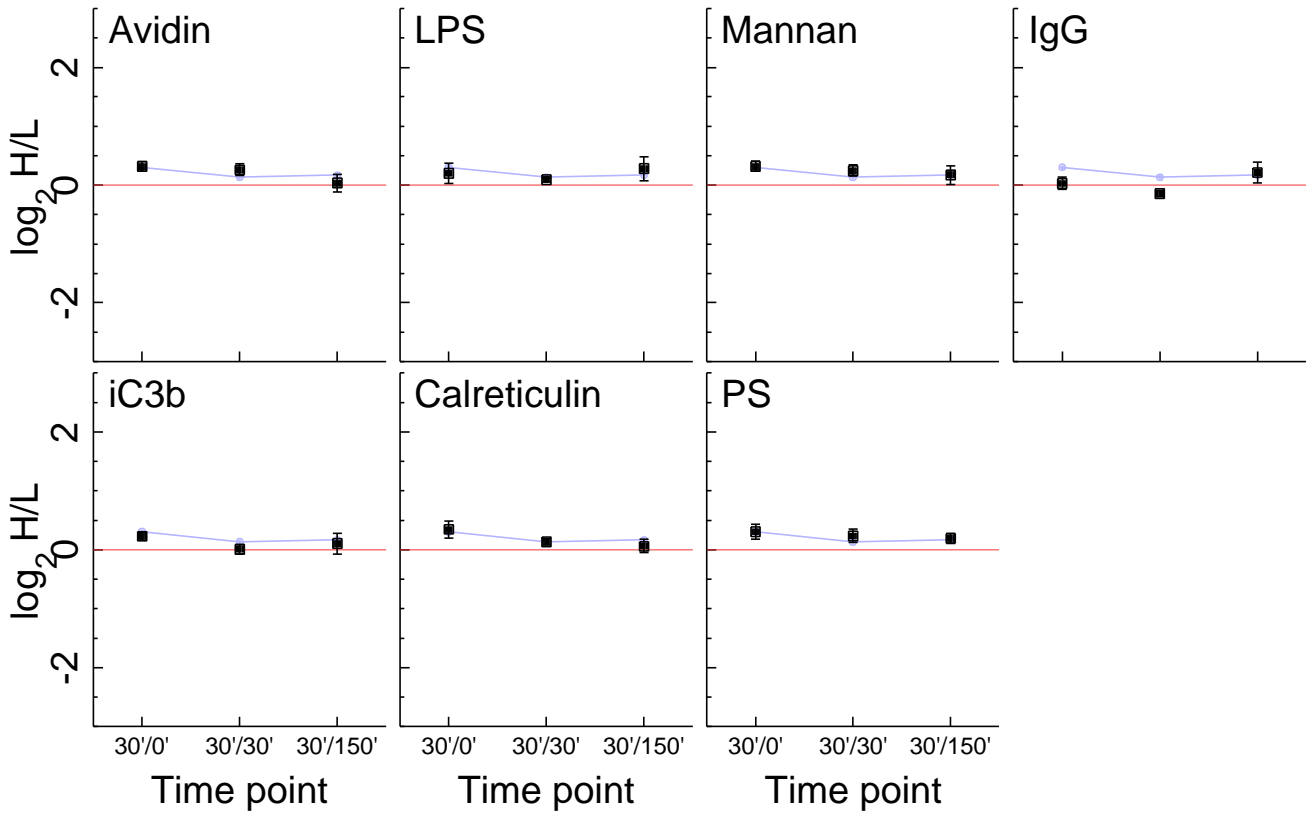



### rab39a (Q8BHD0)

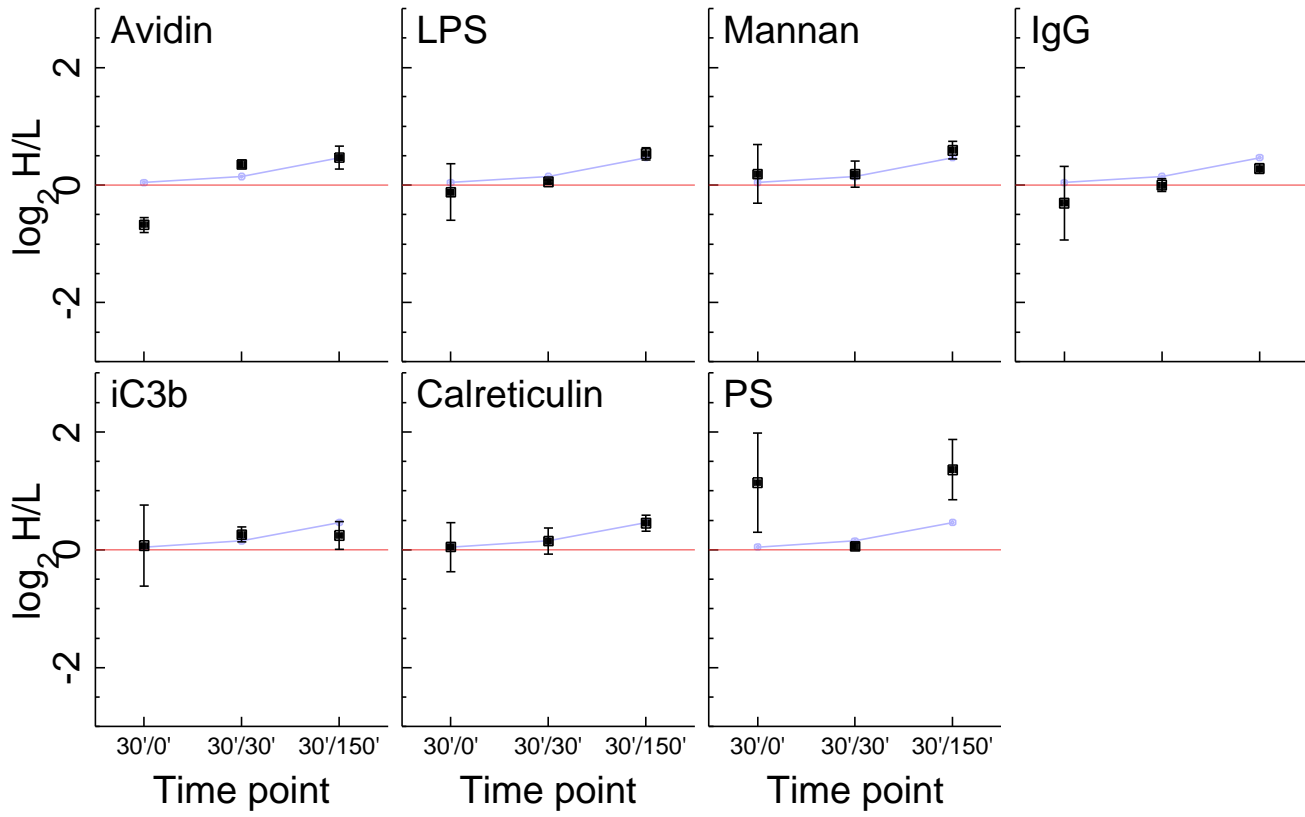

rab3a (P63011)

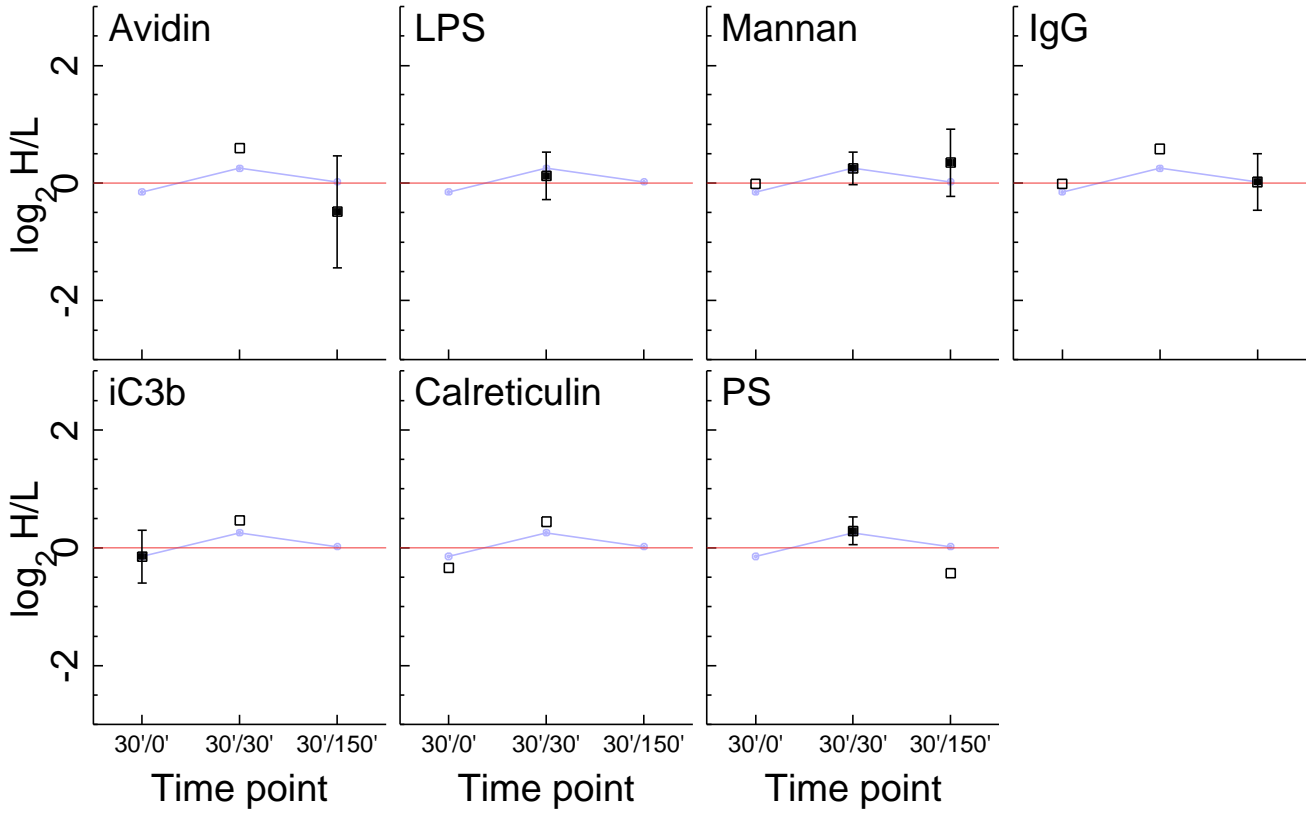

rab3d (P35276)

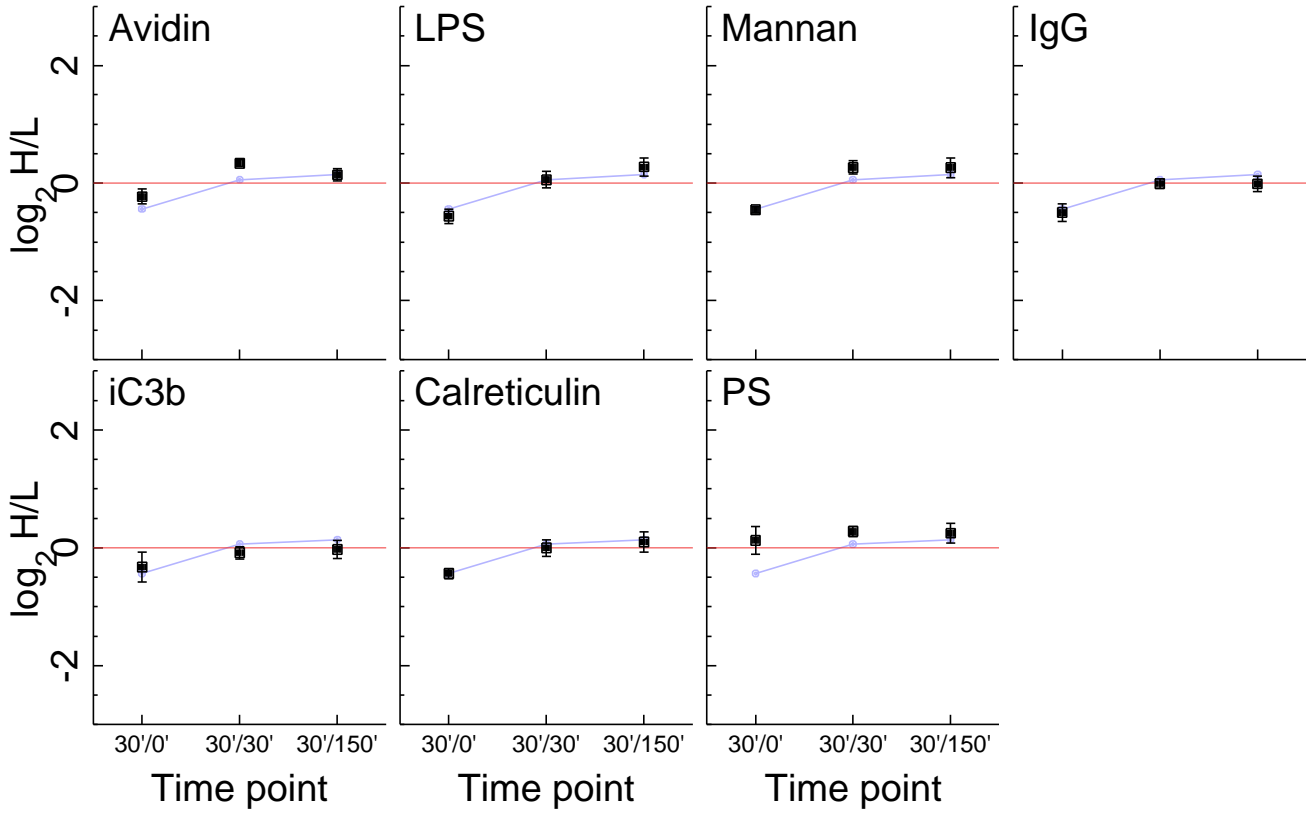

### rab4b (Q91ZR1)

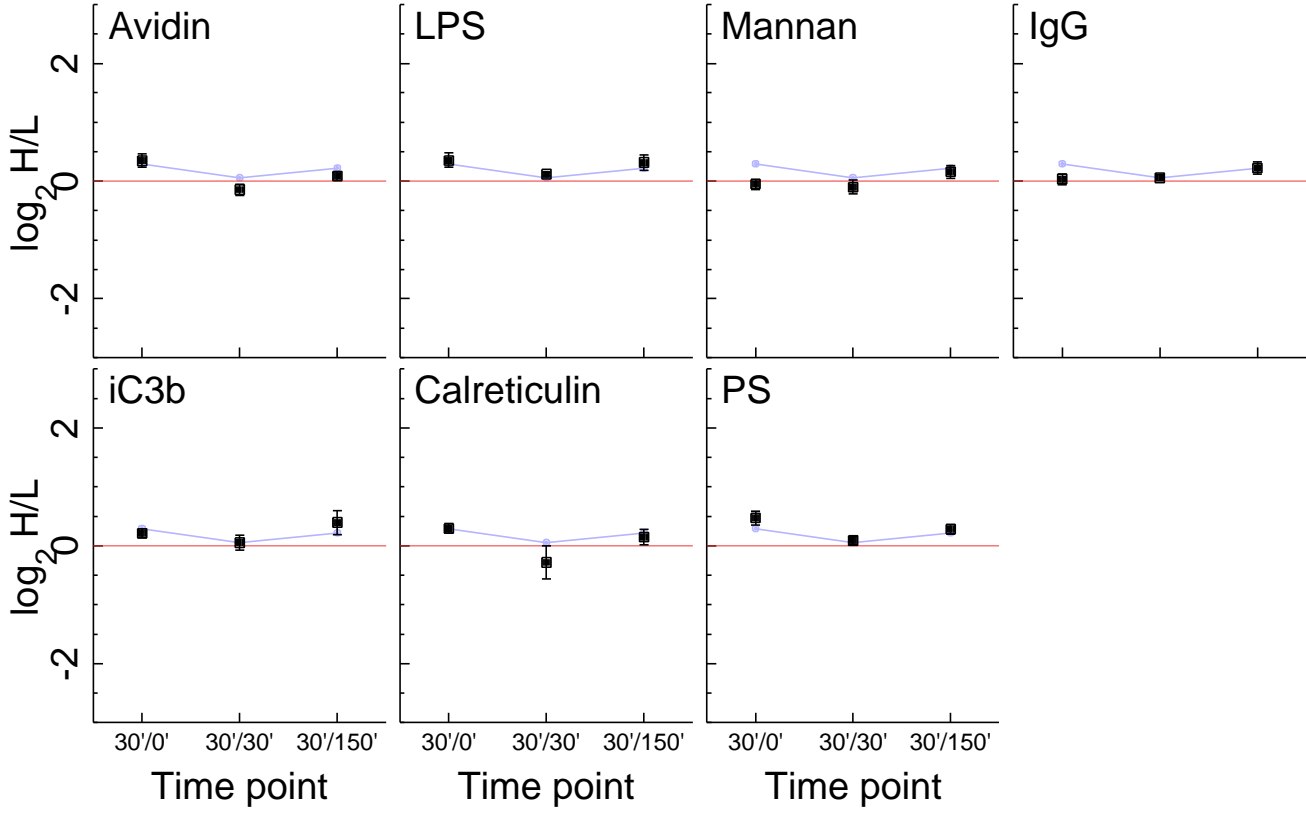

rab5a (Q9CQD1)

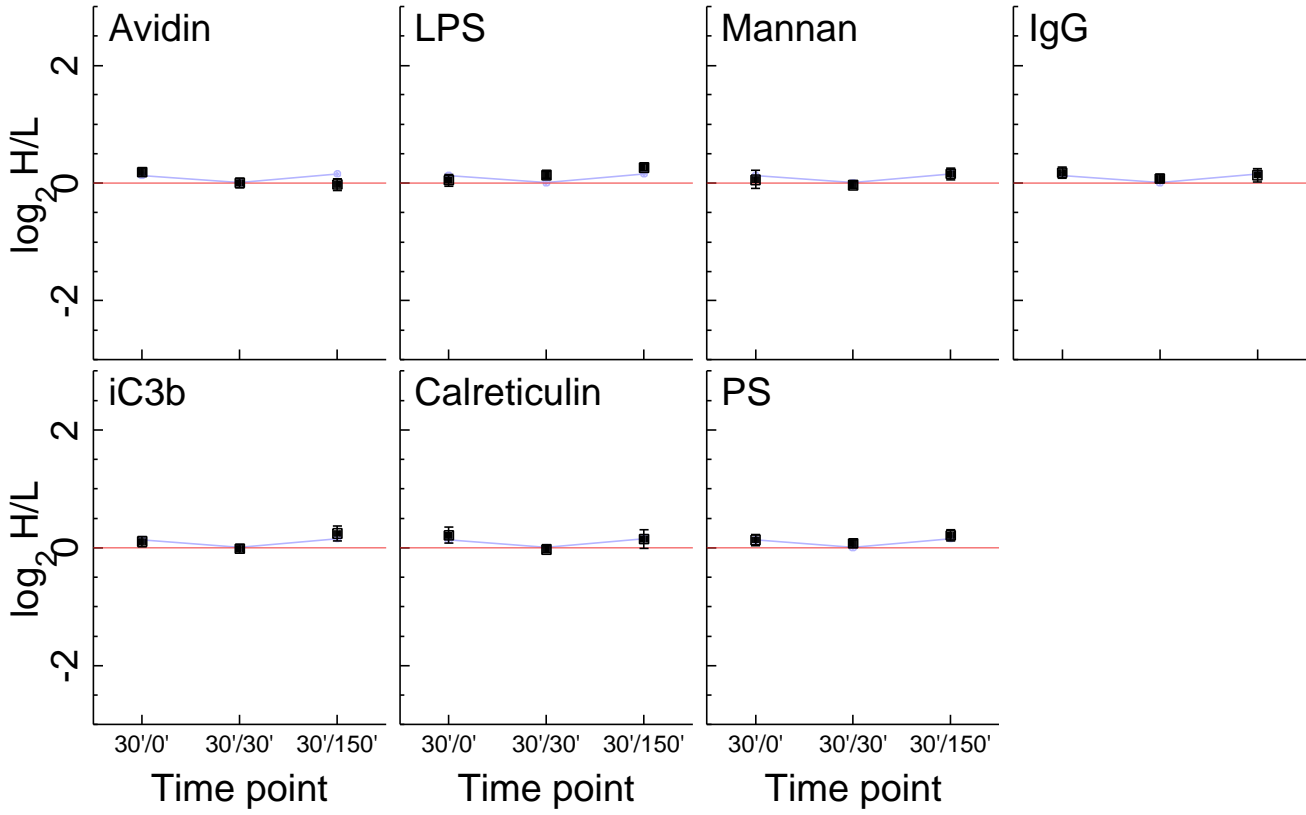

rab5b (P61021)

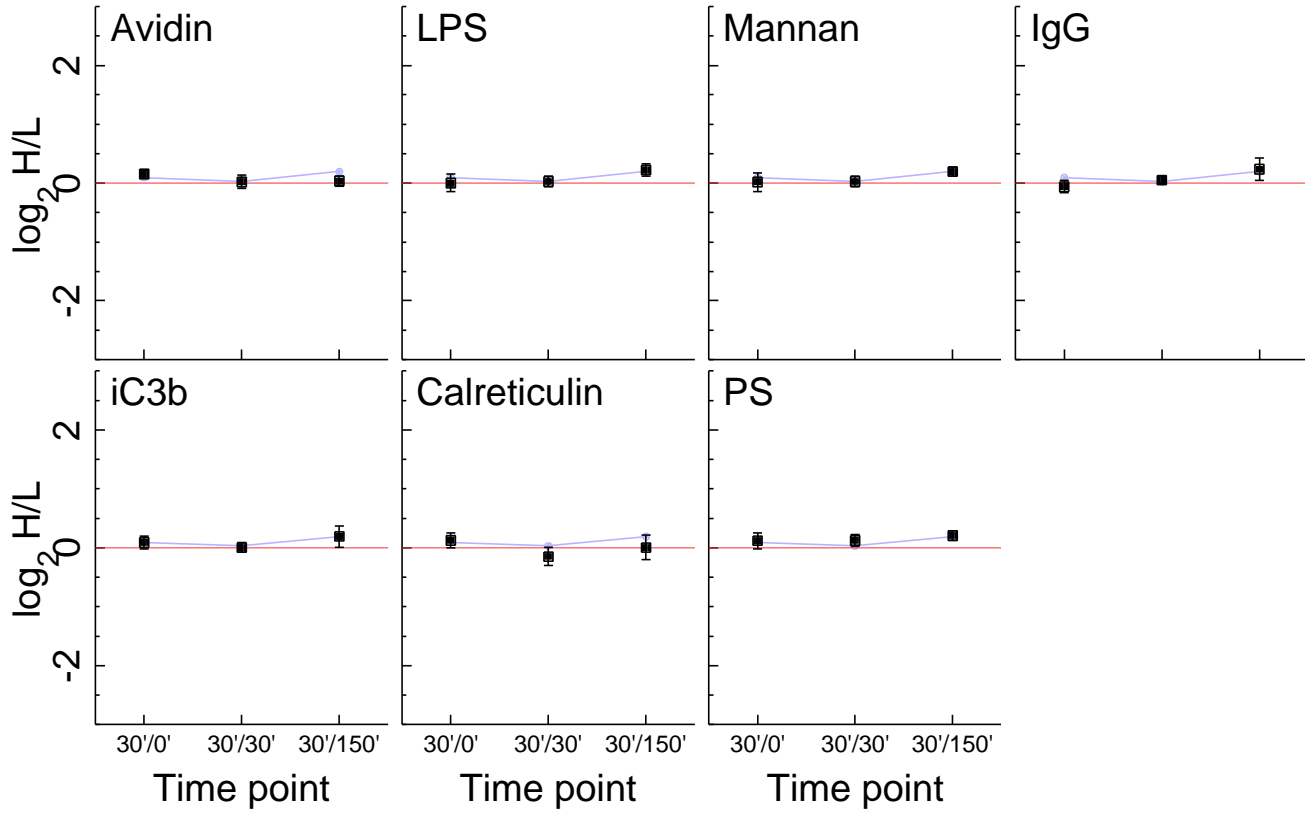

### rab5c (P35278)

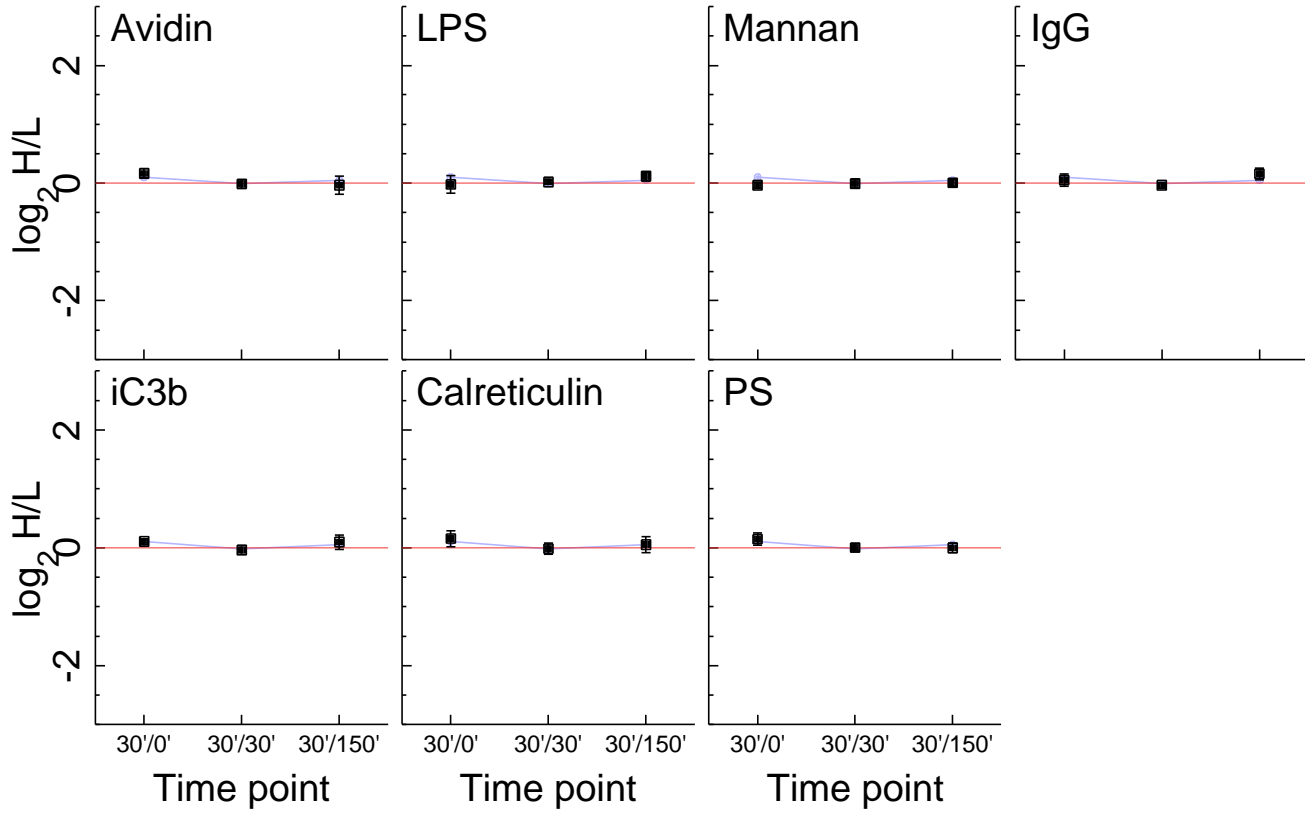

rab6a (P35279)

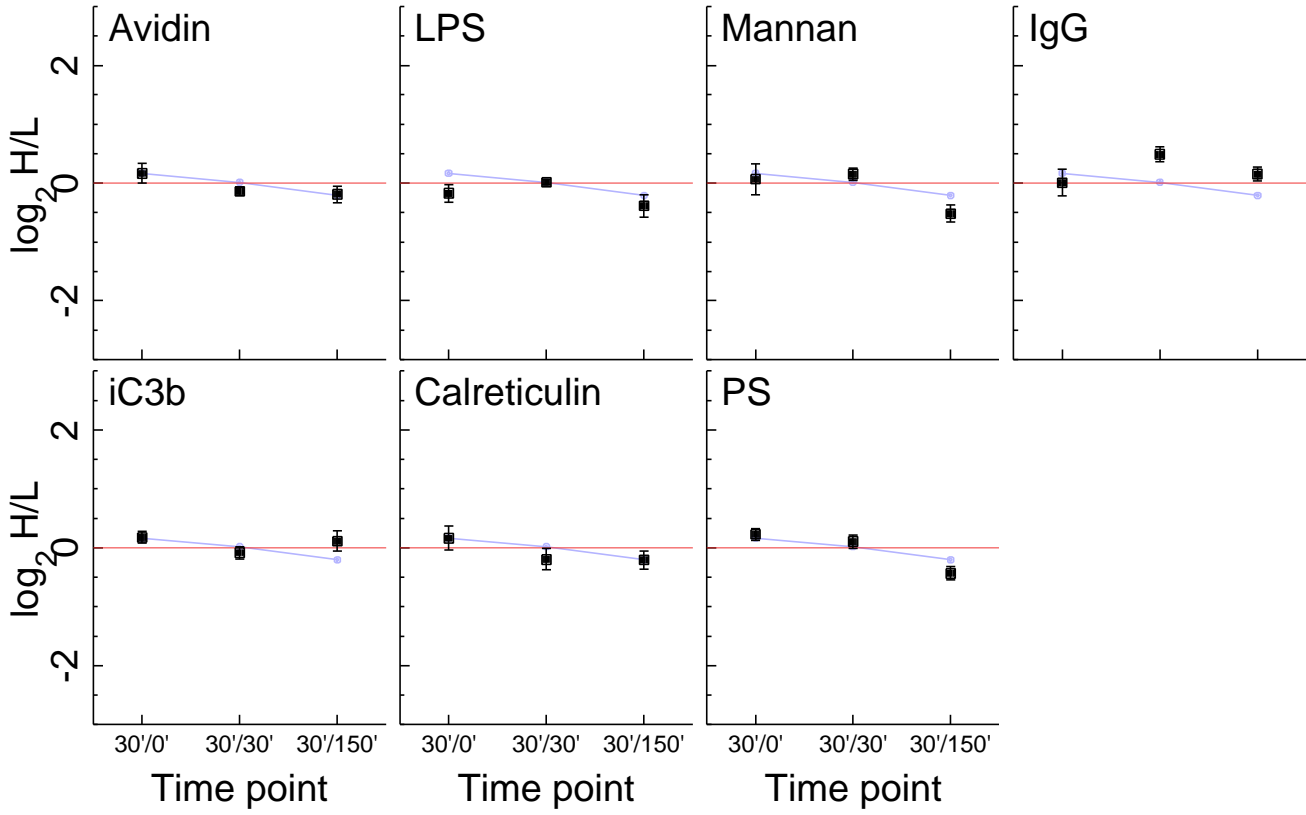



rab6b (P61294)

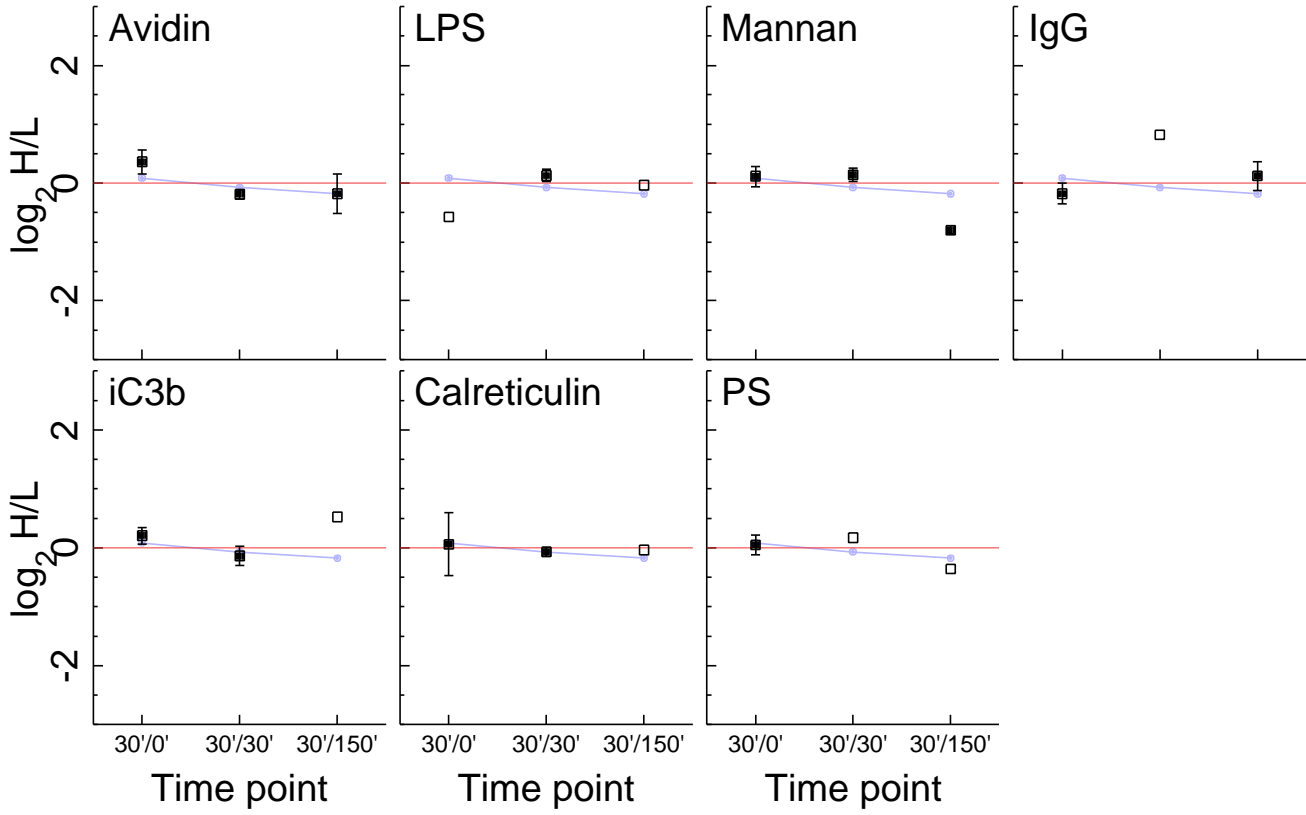

### rab7a (P51150)

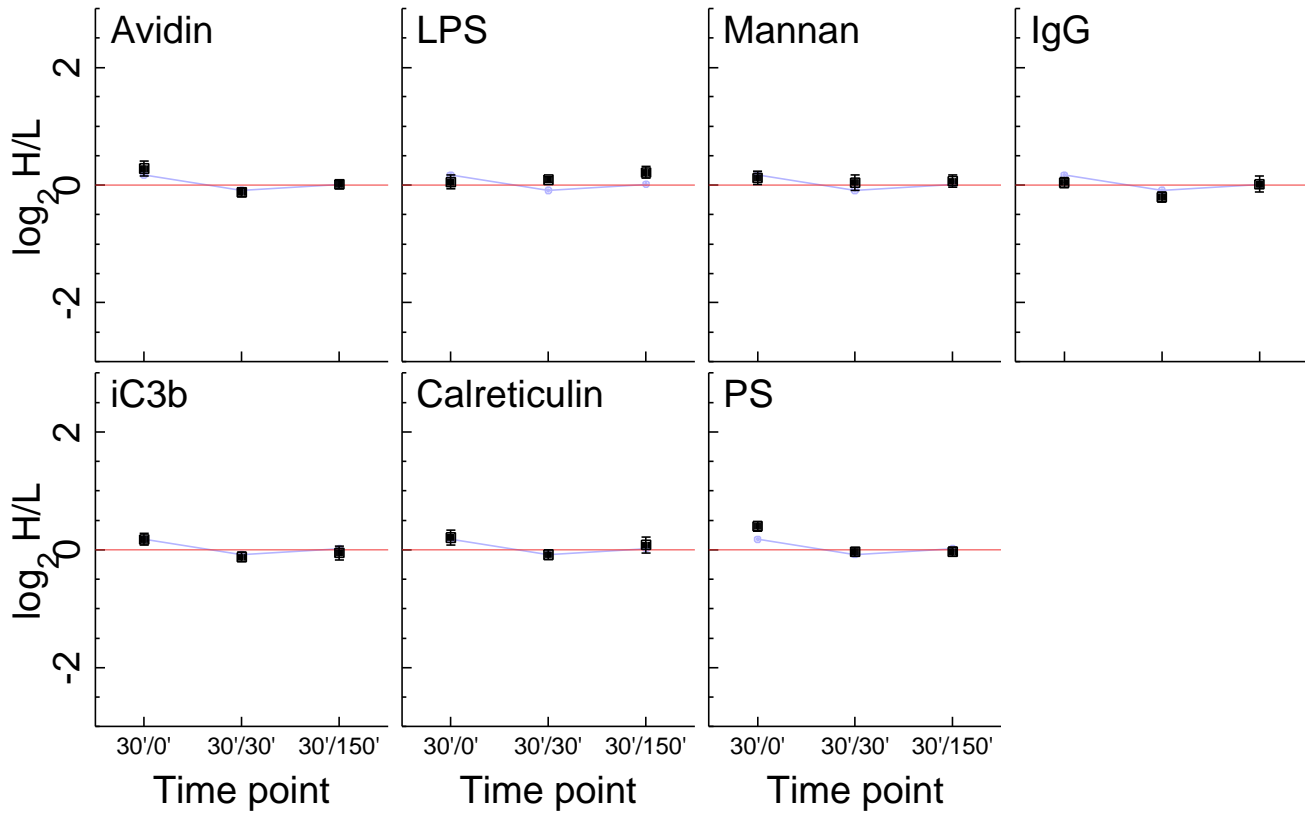

### rab7b (Q8VEA8)

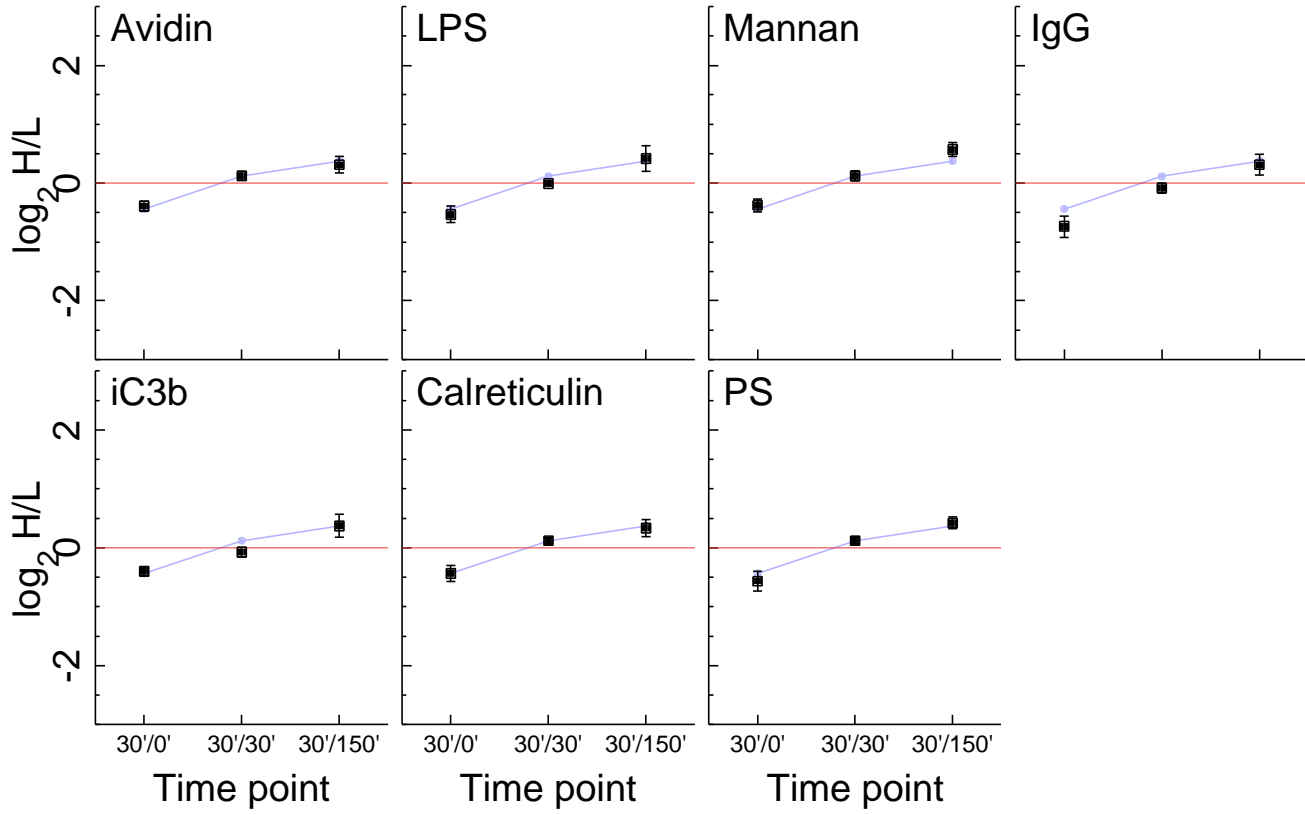

### rab711 (E9QLQ7)

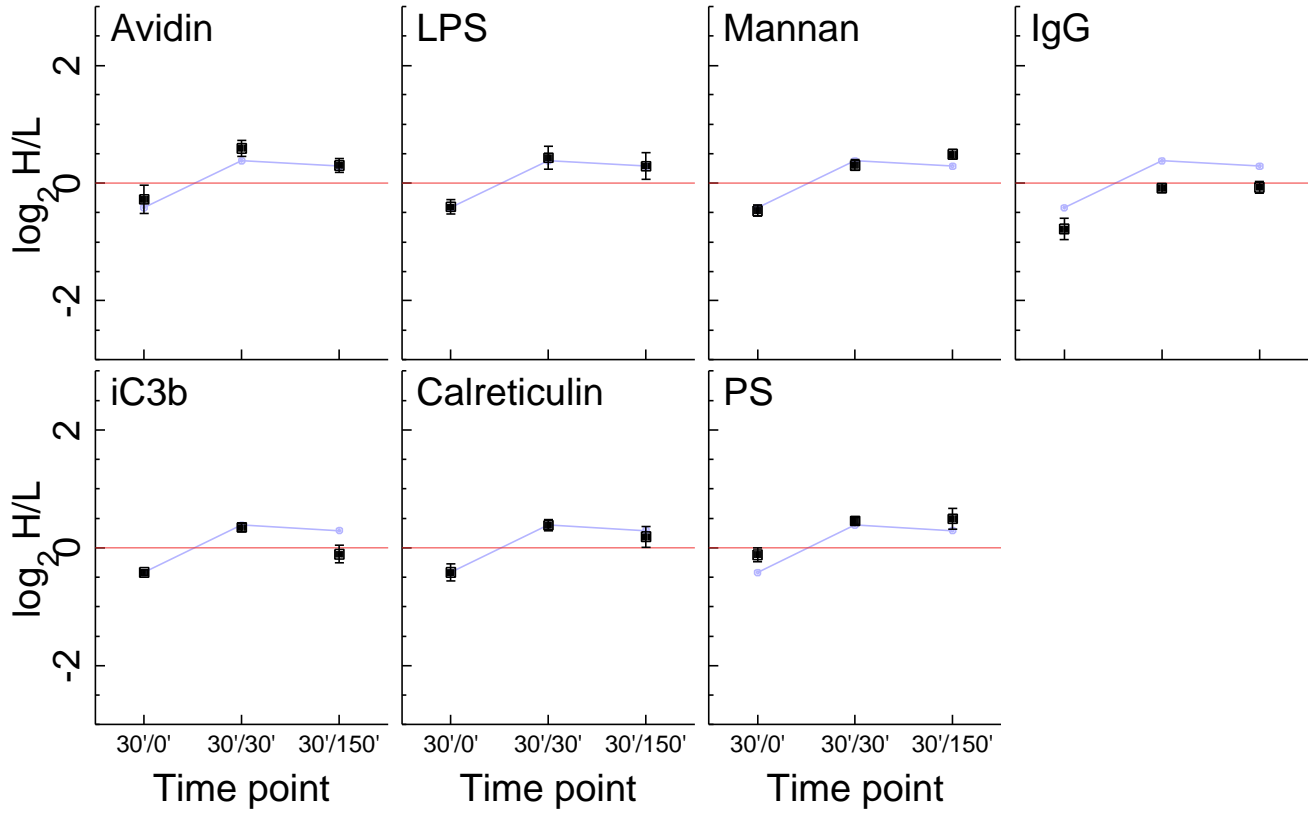

rab8a (P55258)

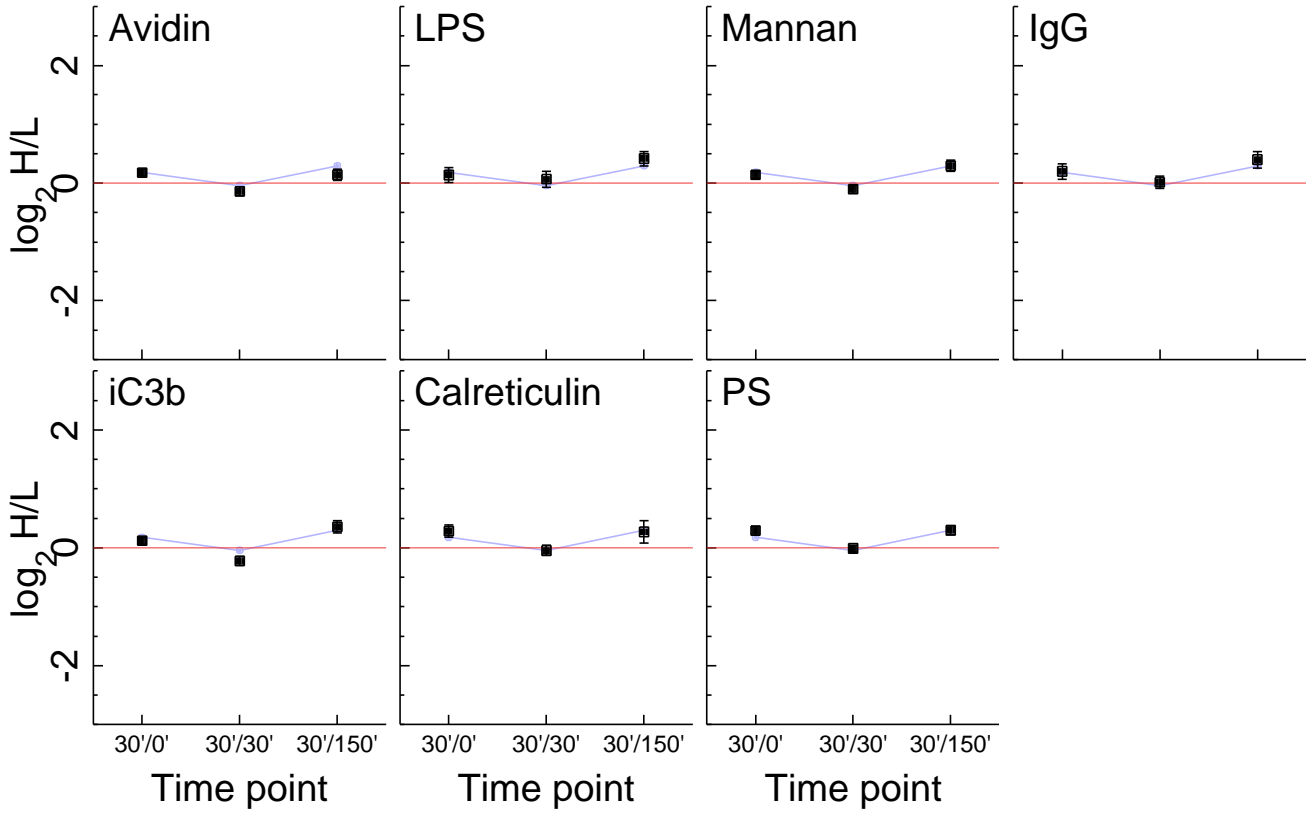

rab8b (P61028)

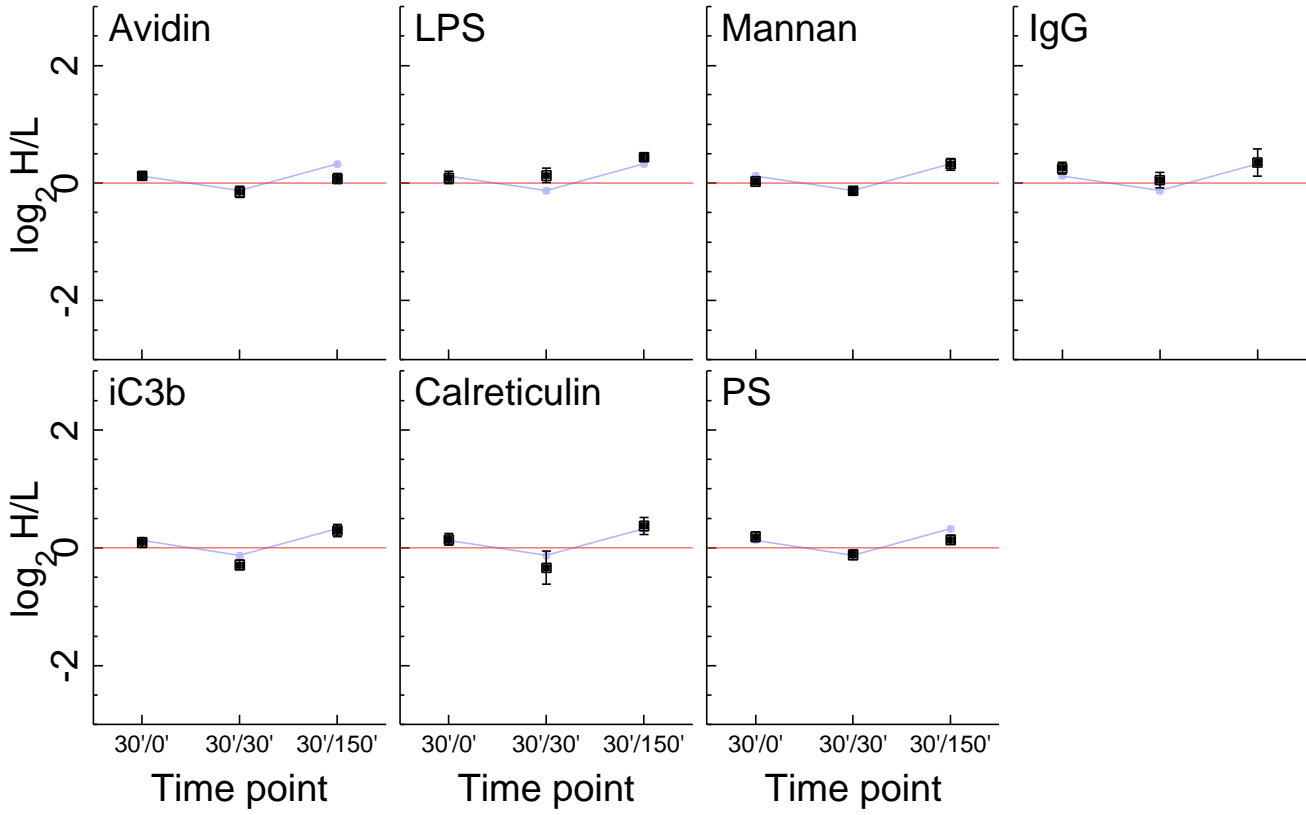

rab9a (Q9R0M6)

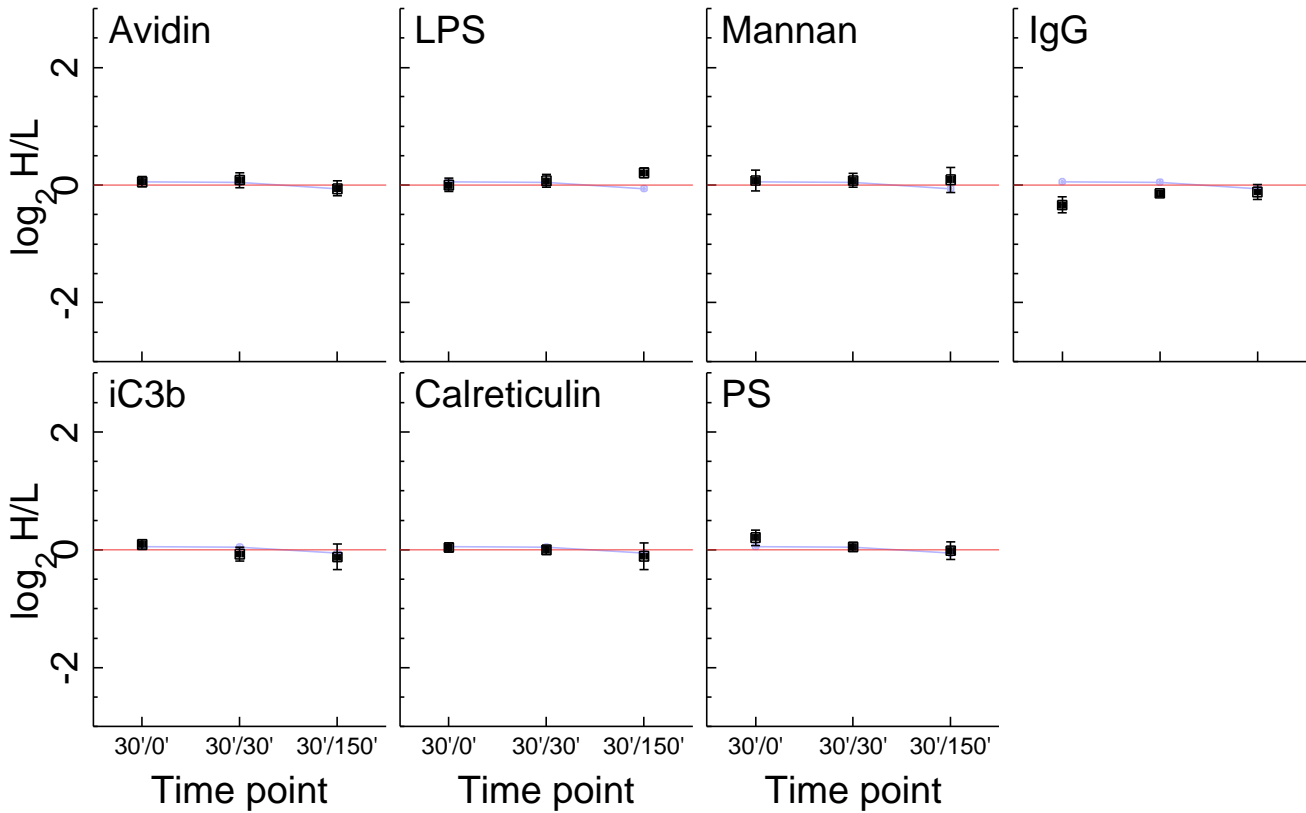

rabl3 (Q9D4V7)

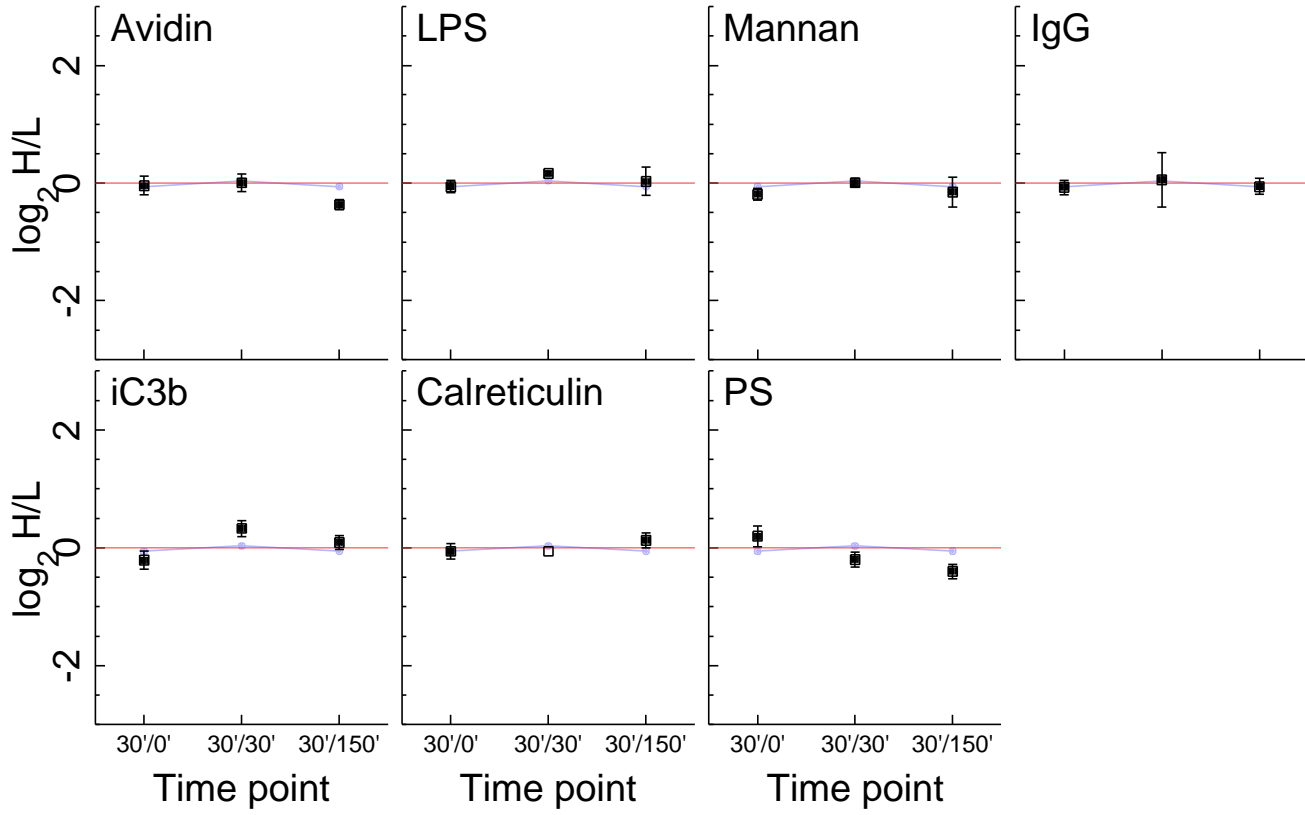



### rac1 (Q3TLP8)

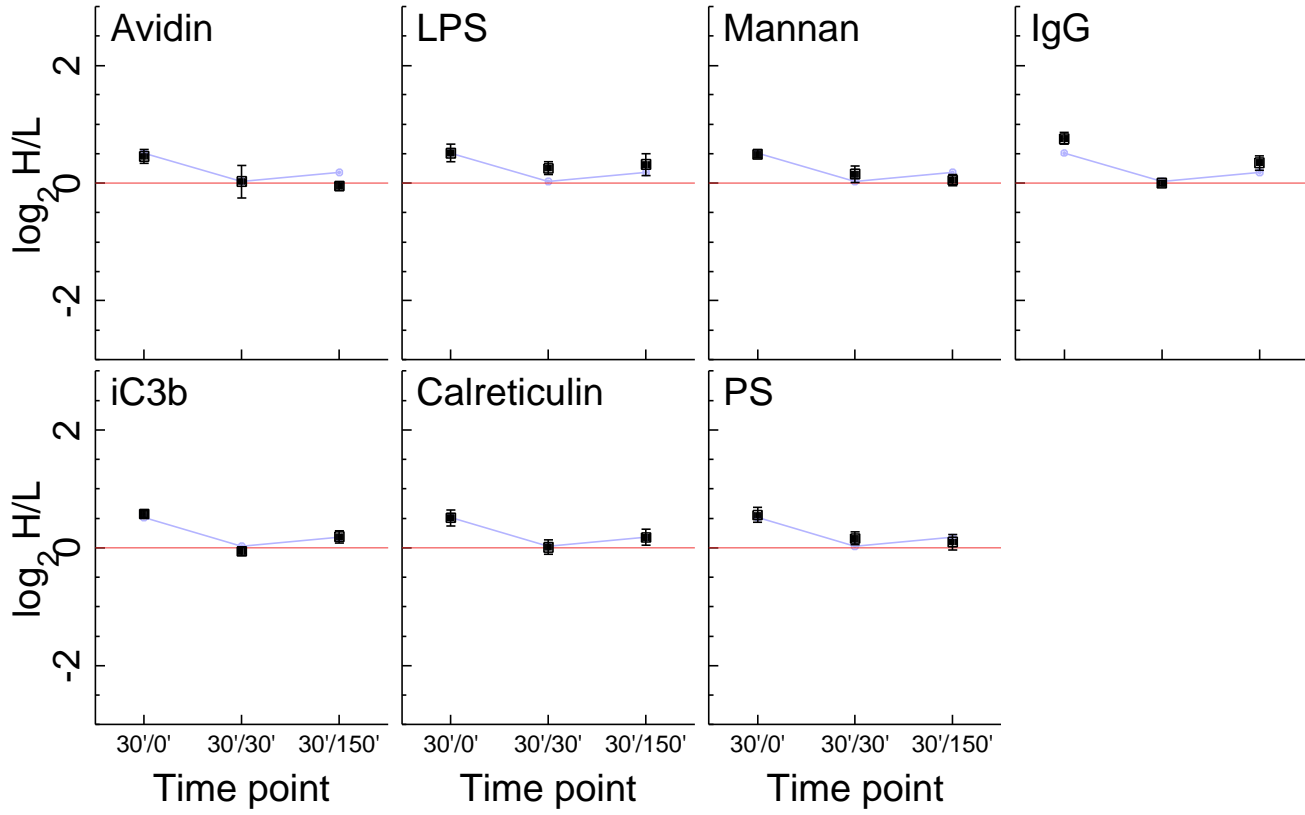

rac2 (Q05144)

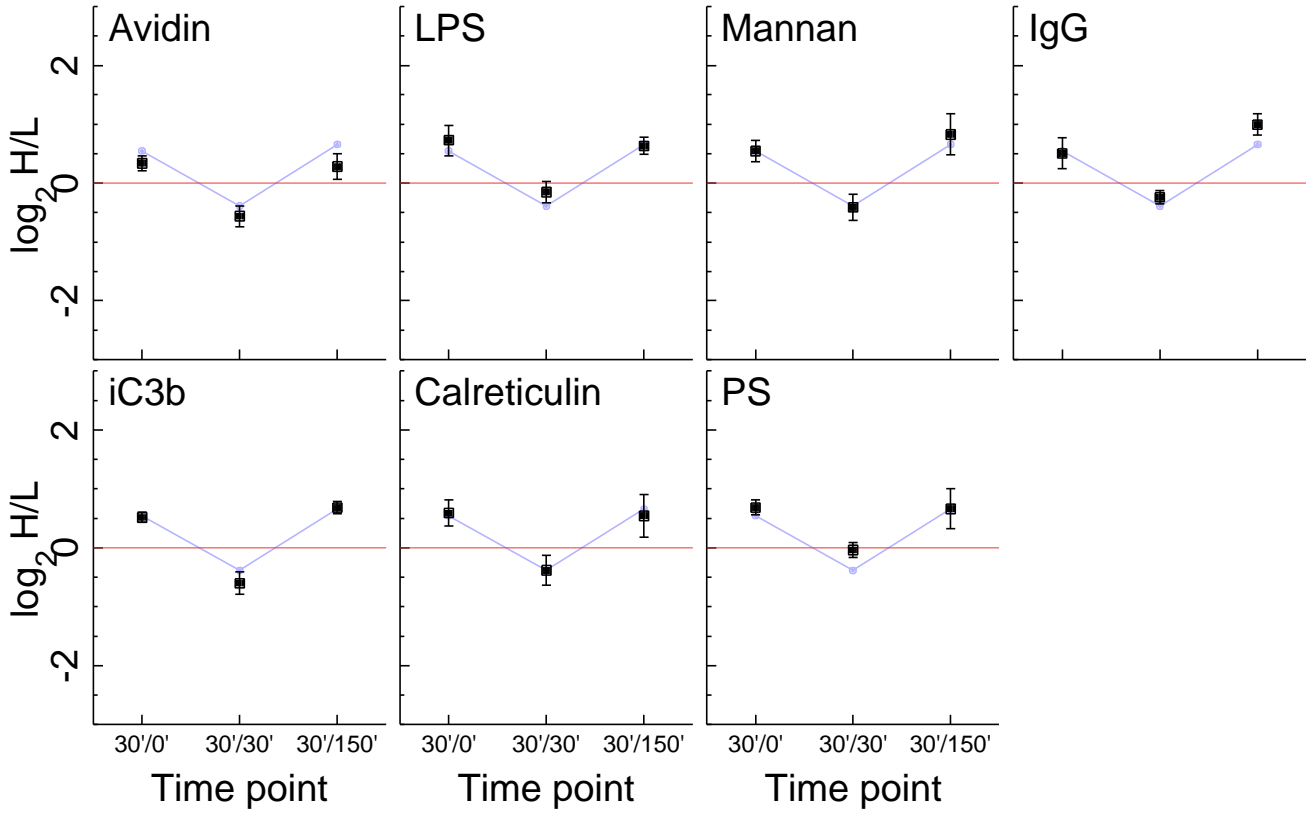

rala (P63321)

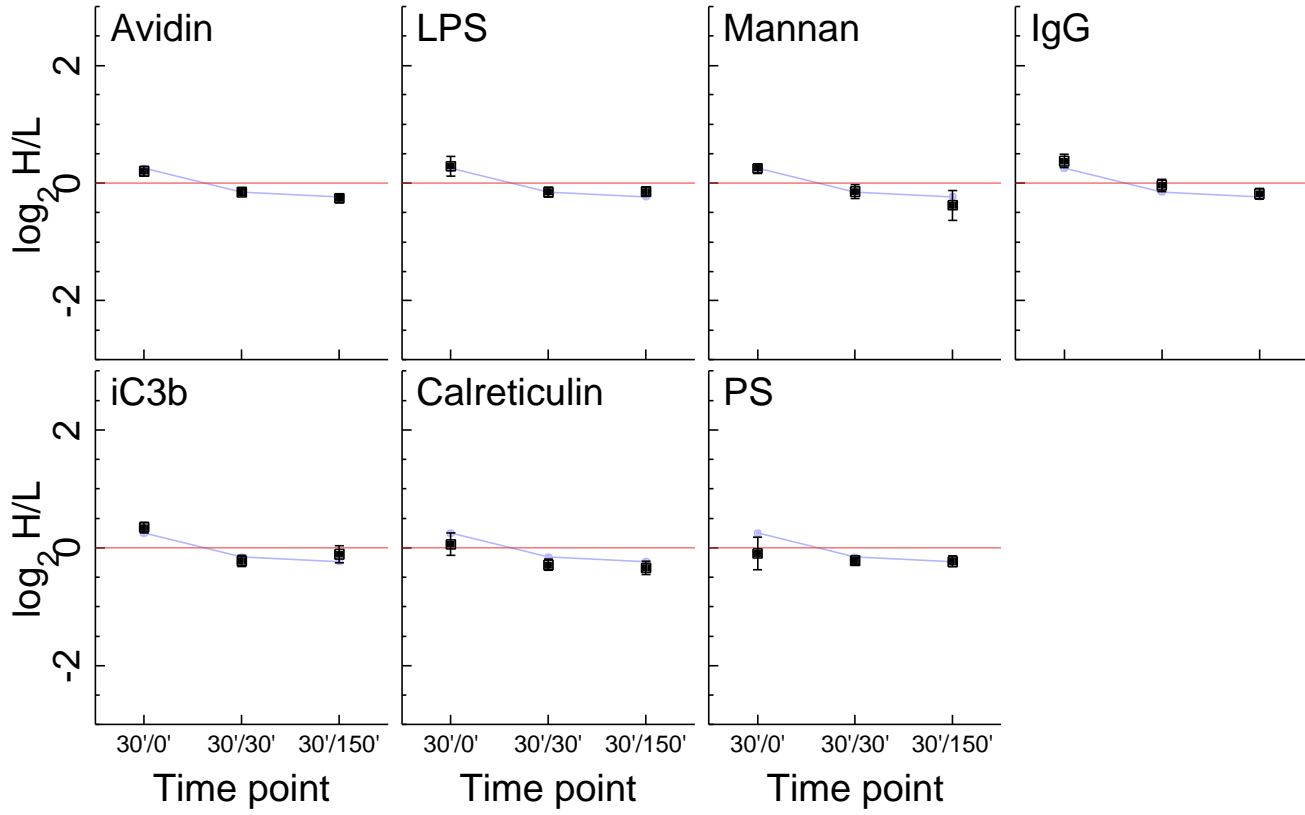

ralb (Q9JIW9)

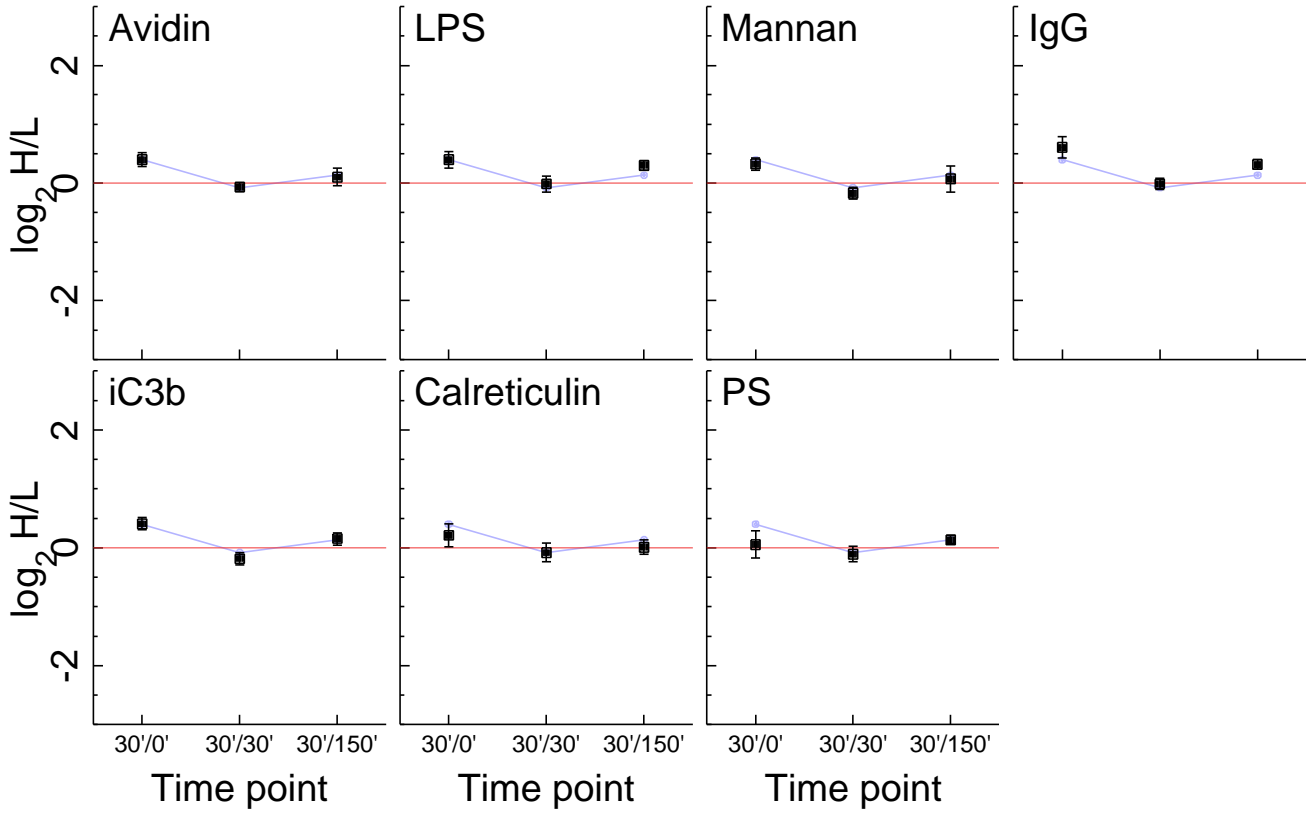

raly (Q64012)

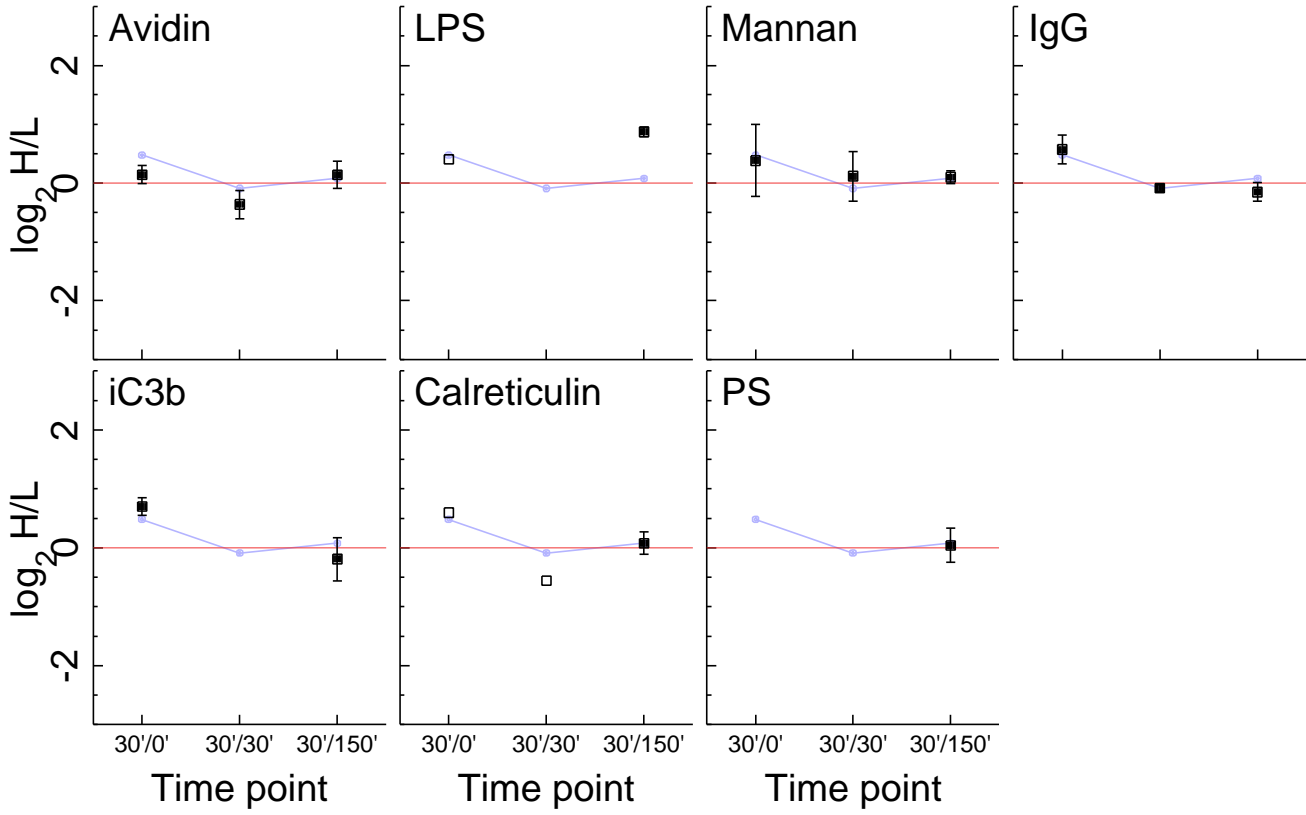

ranbp1 (P34022)

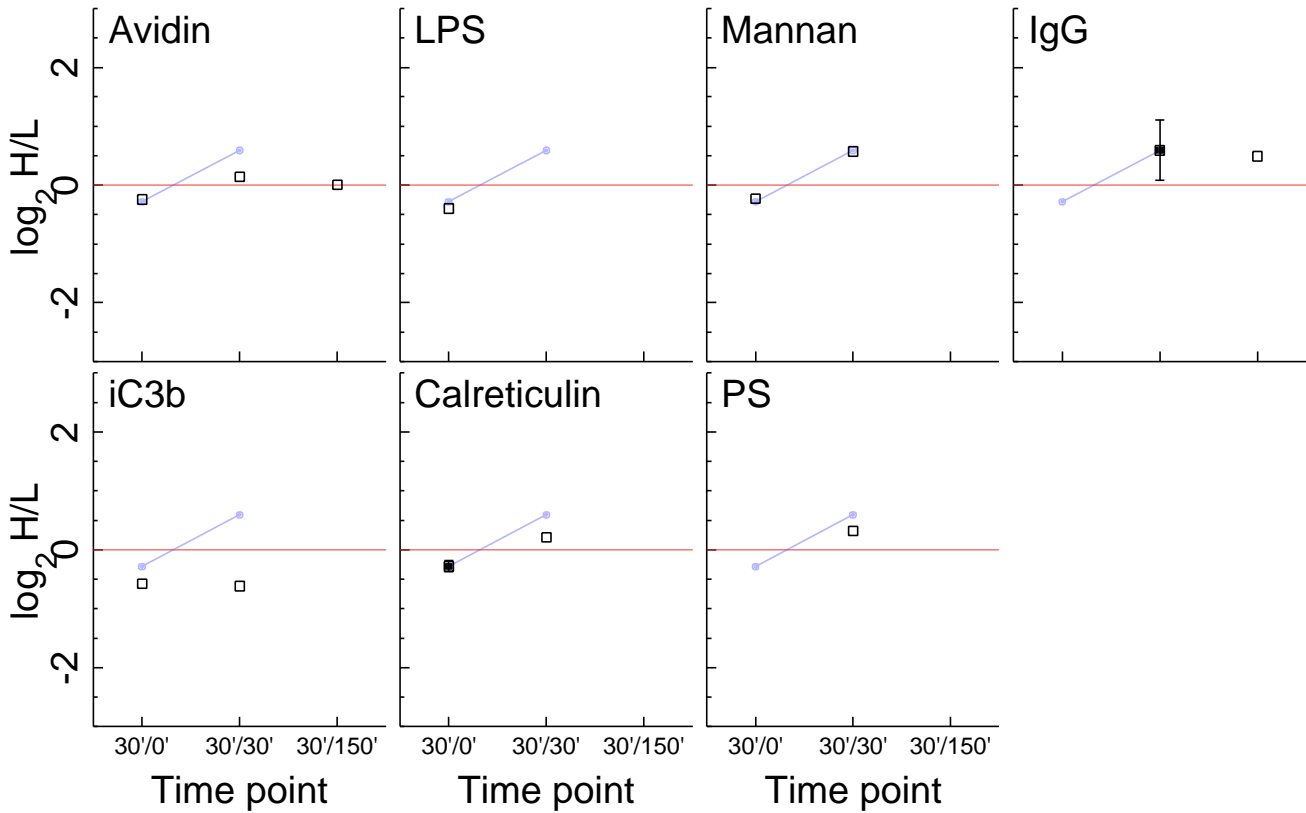

### ranbp2 (Q9ERU9)

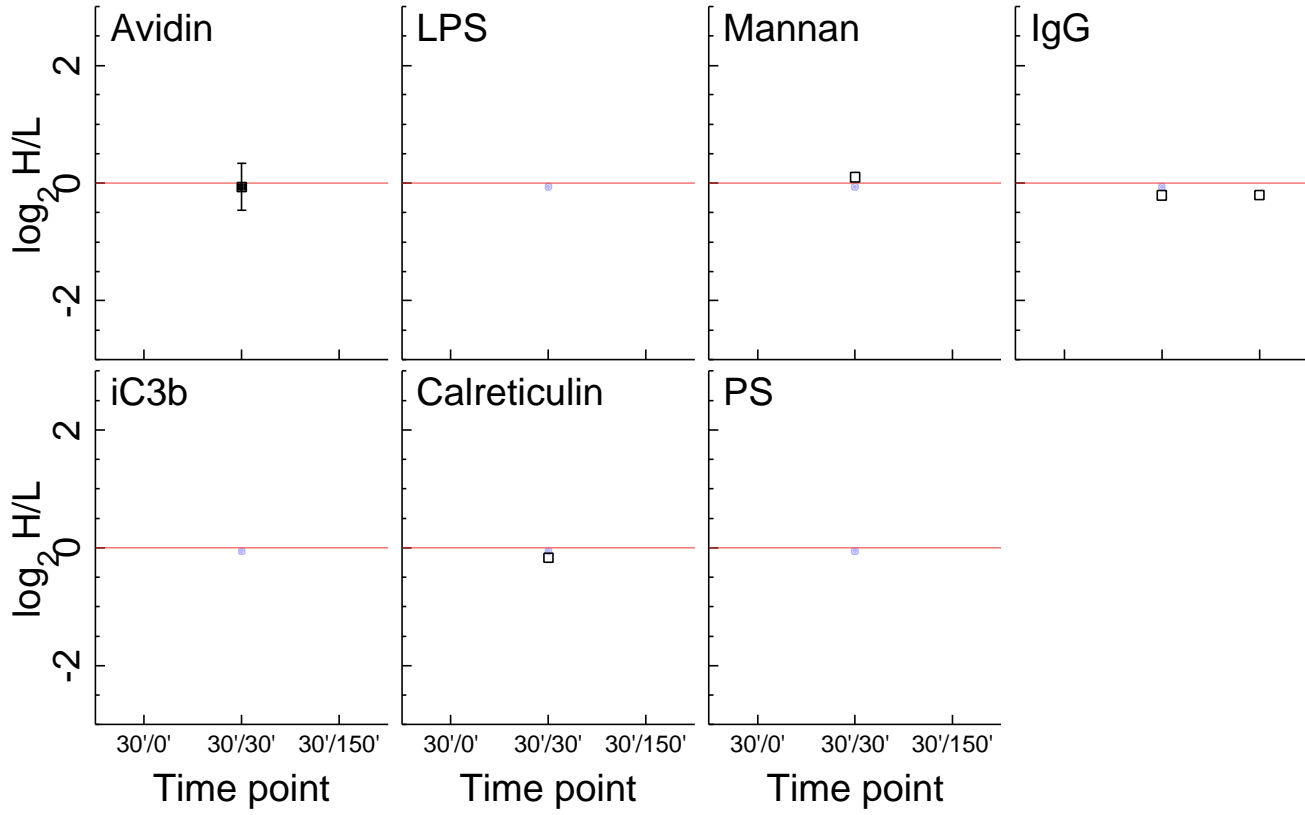

rangap1 (P46061)

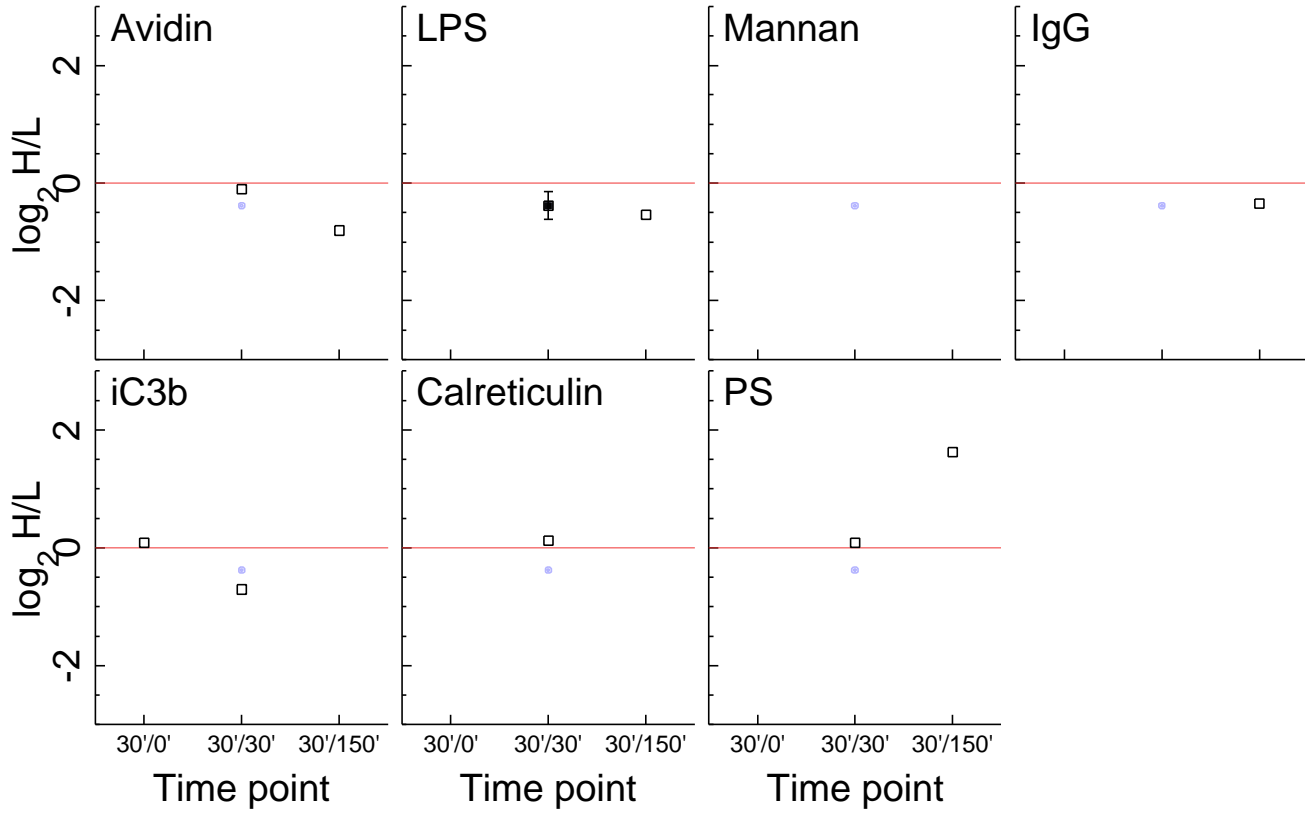



ran (P62827)

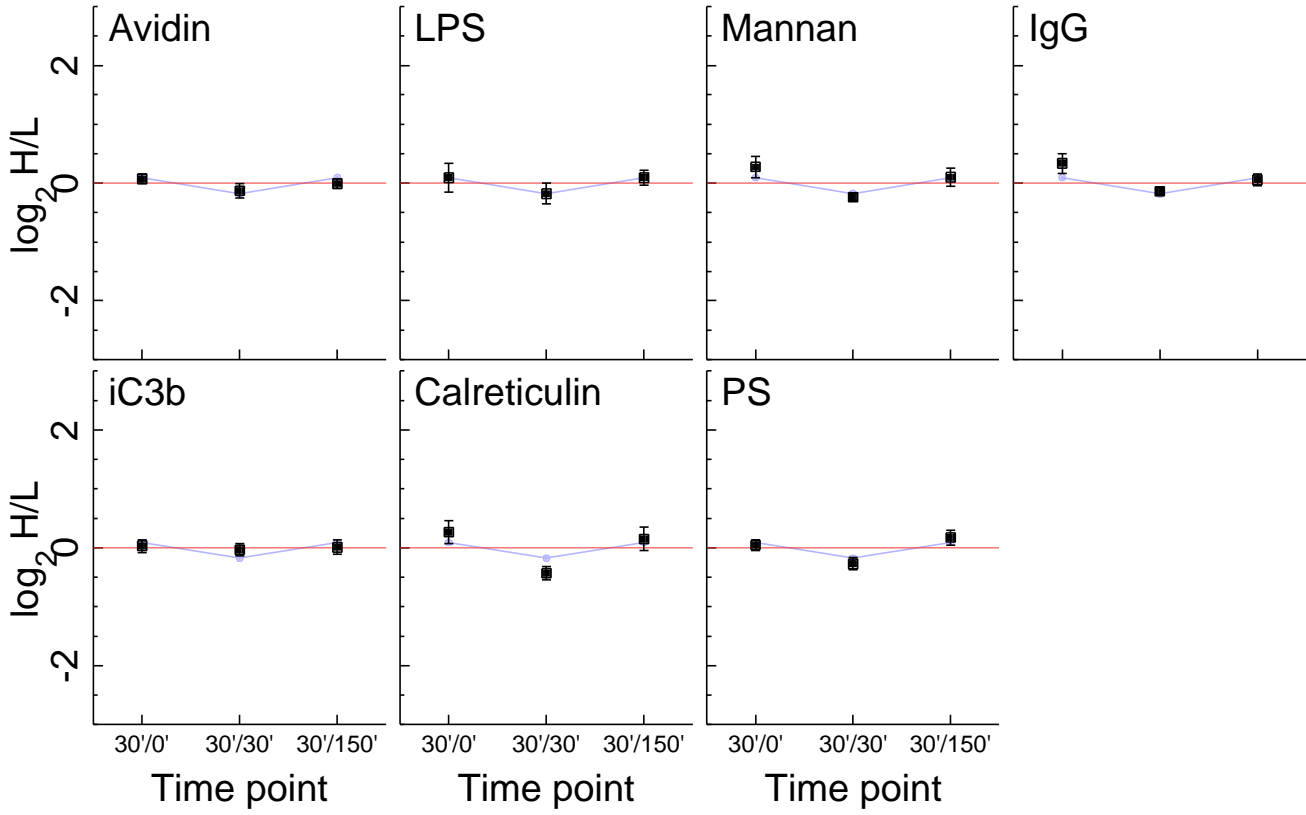

rap1a (P62835)

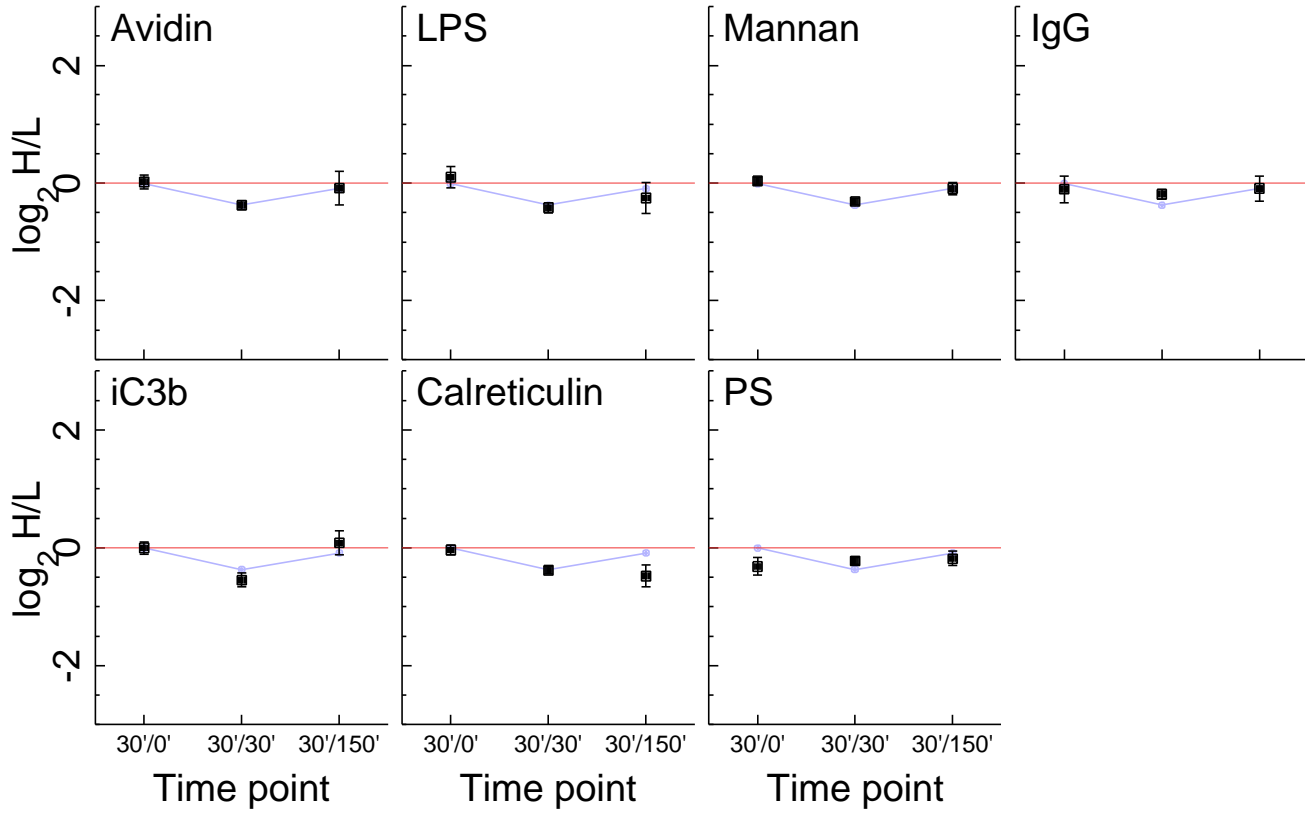

rap1b (Q99JI6)

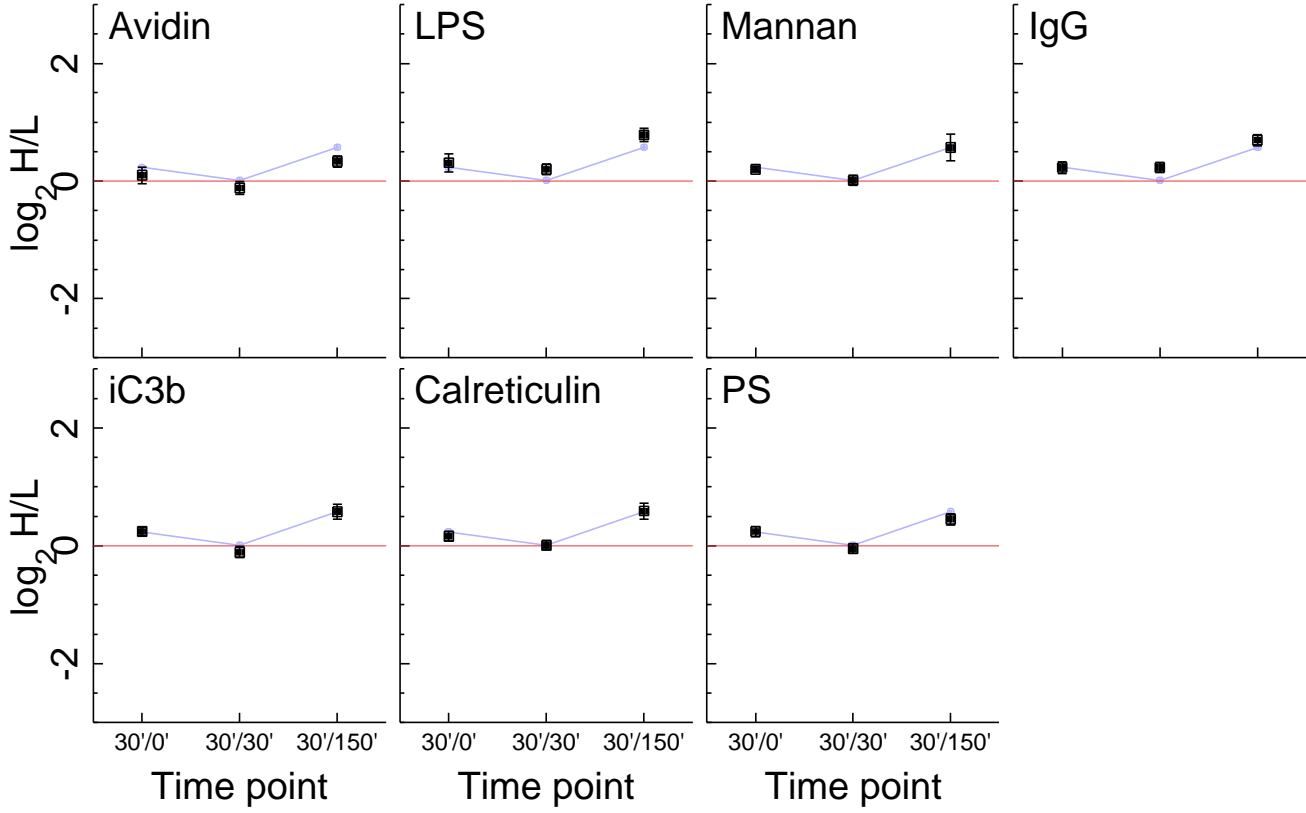

### rap2a (Q80ZJ1)

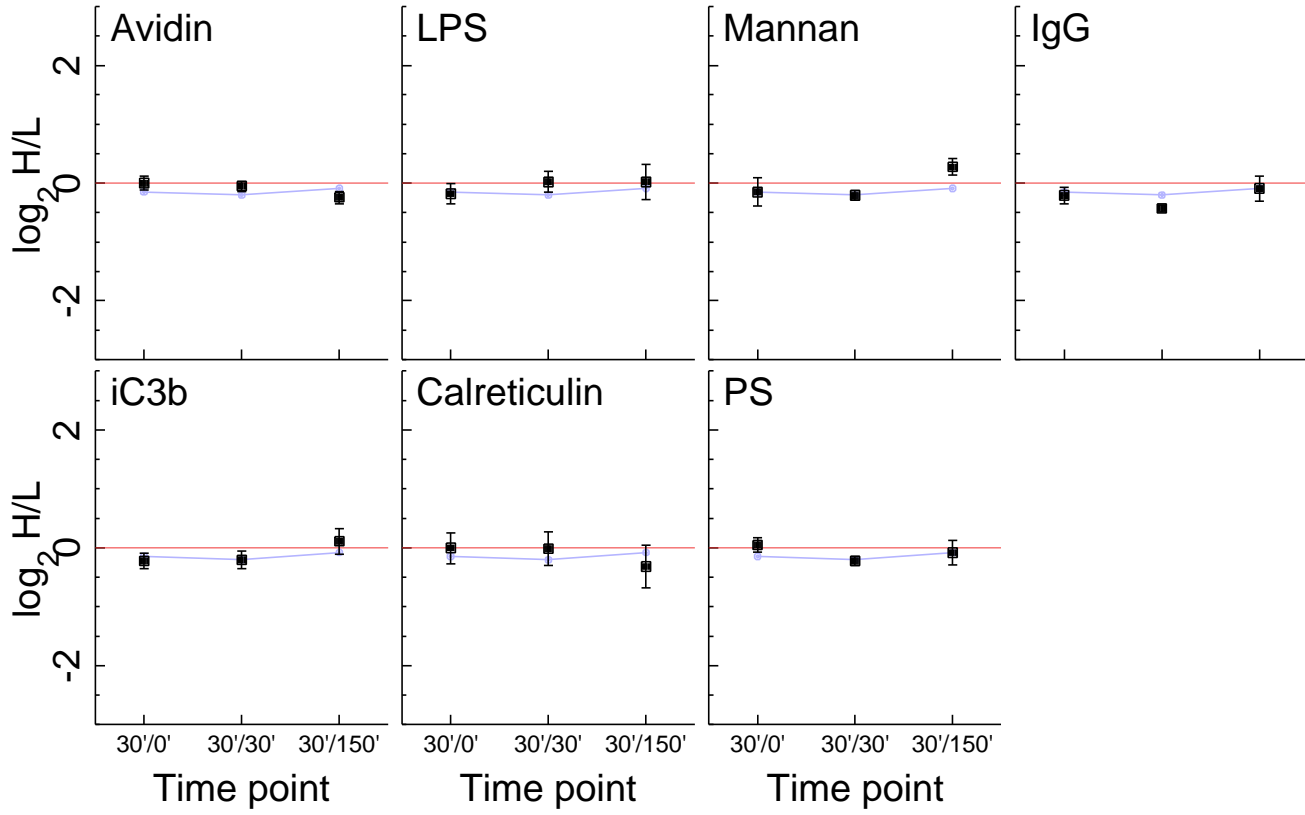

rap2b (P61226)

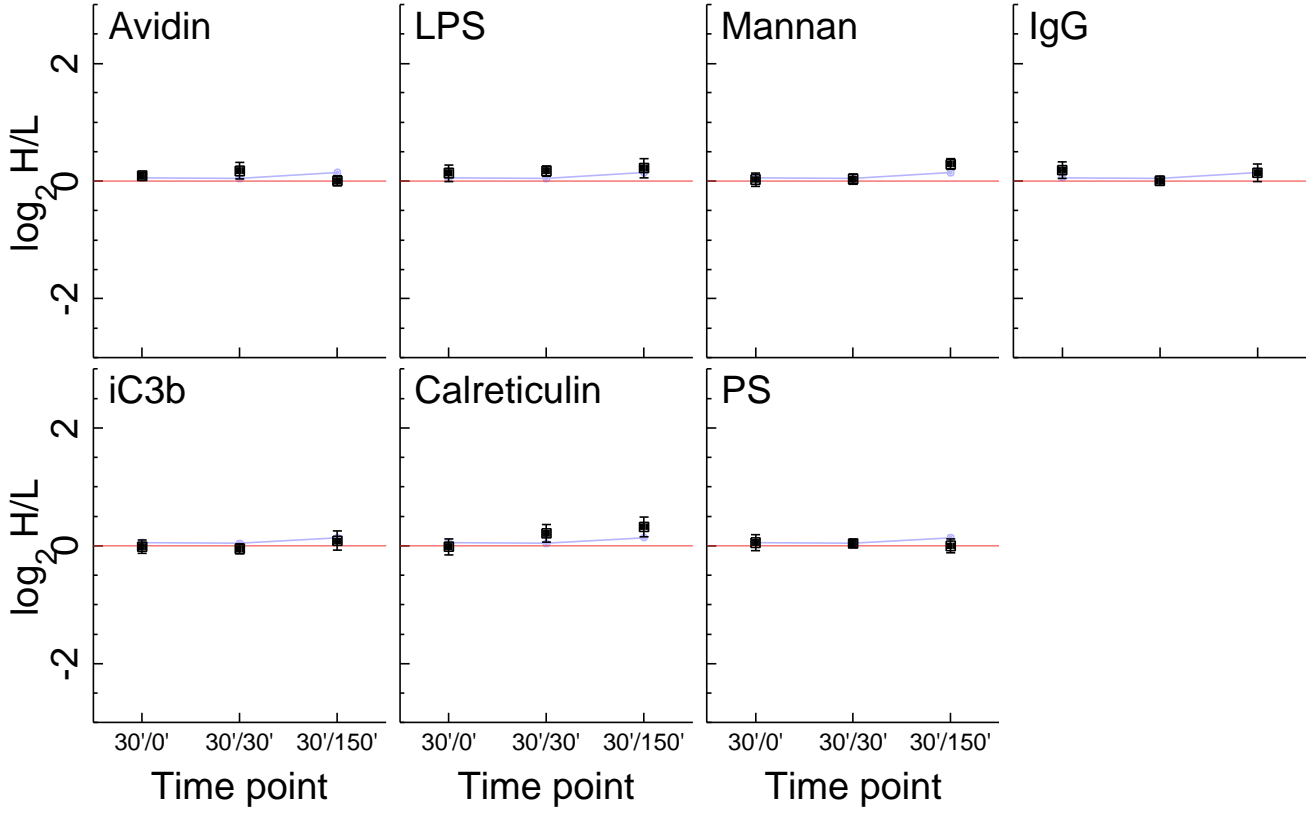

rap2c (Q8BU31)

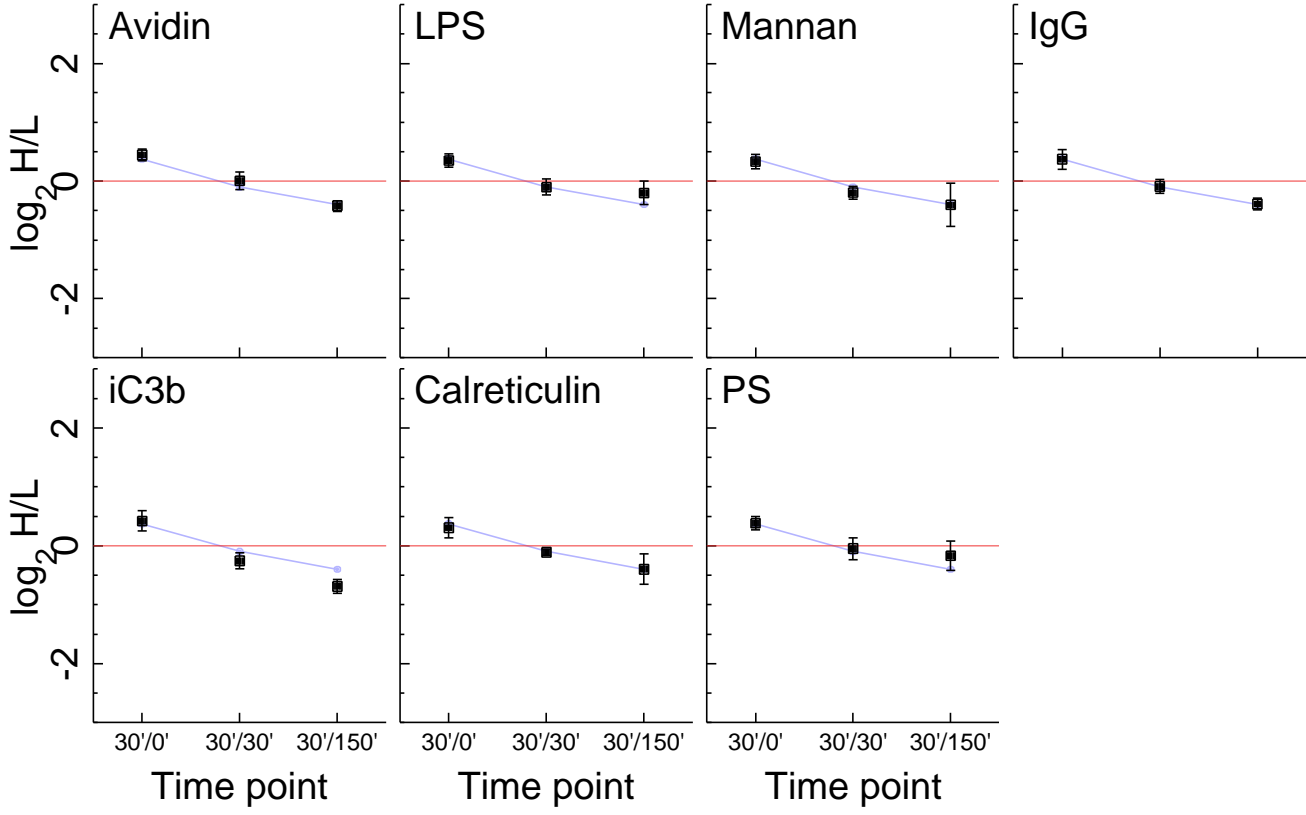

rasa3 (Q60790)

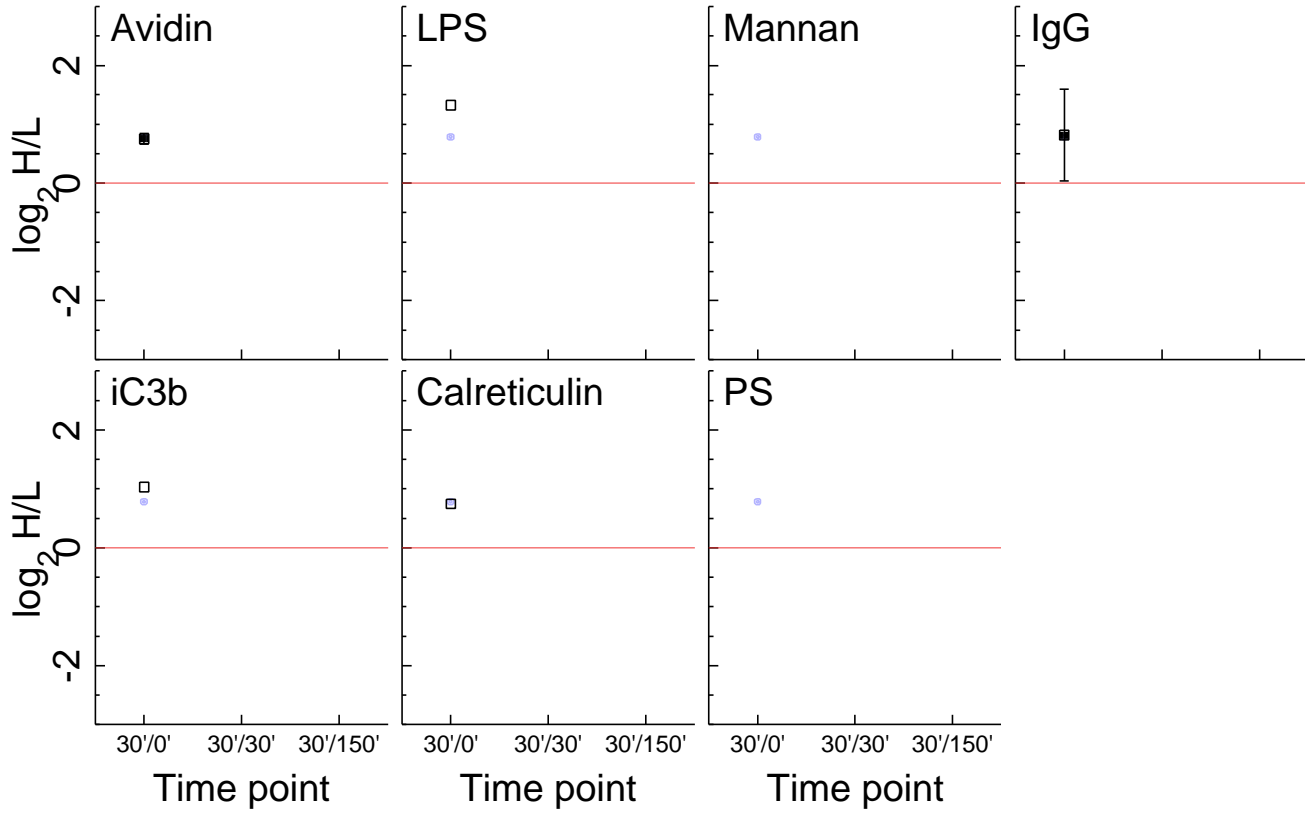

rasa4 (Q6PFQ7)

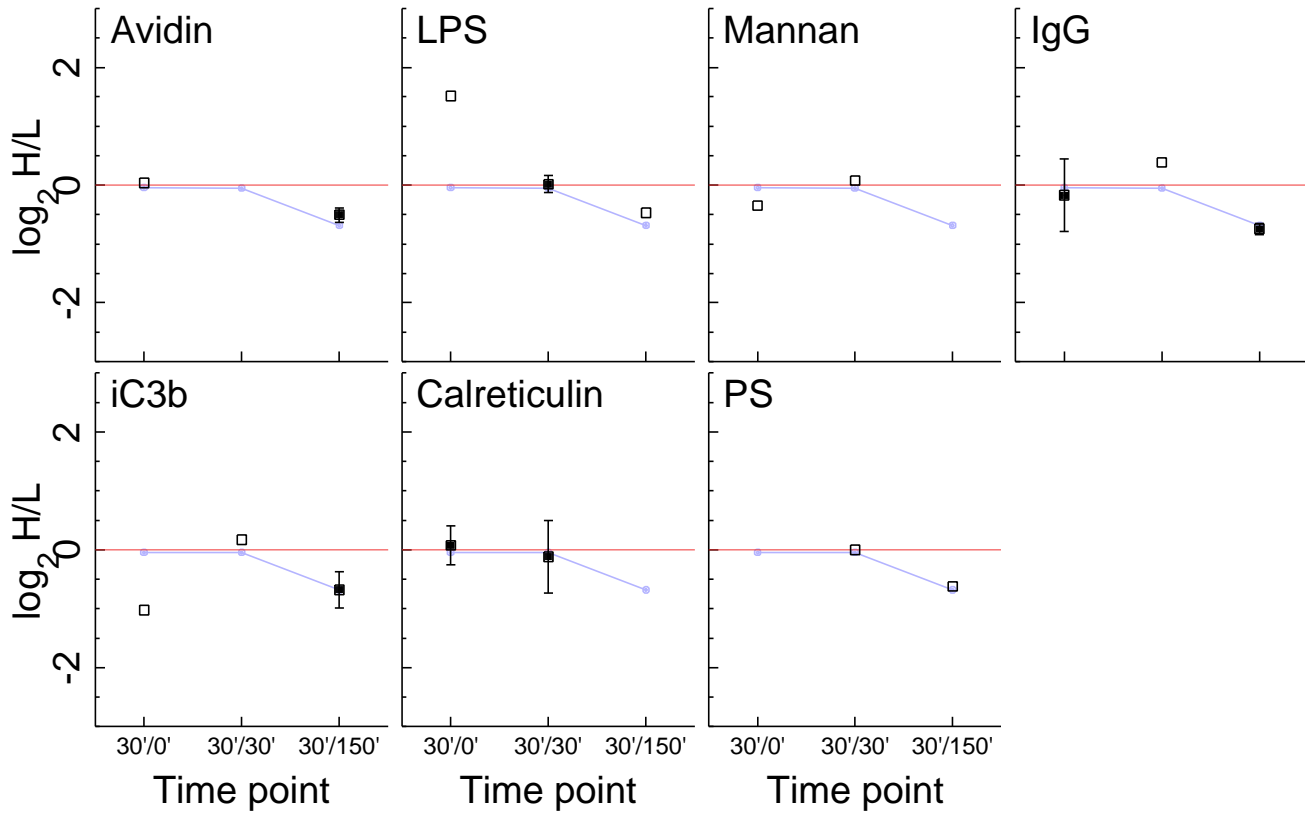



rassf4 (Q8CB96)

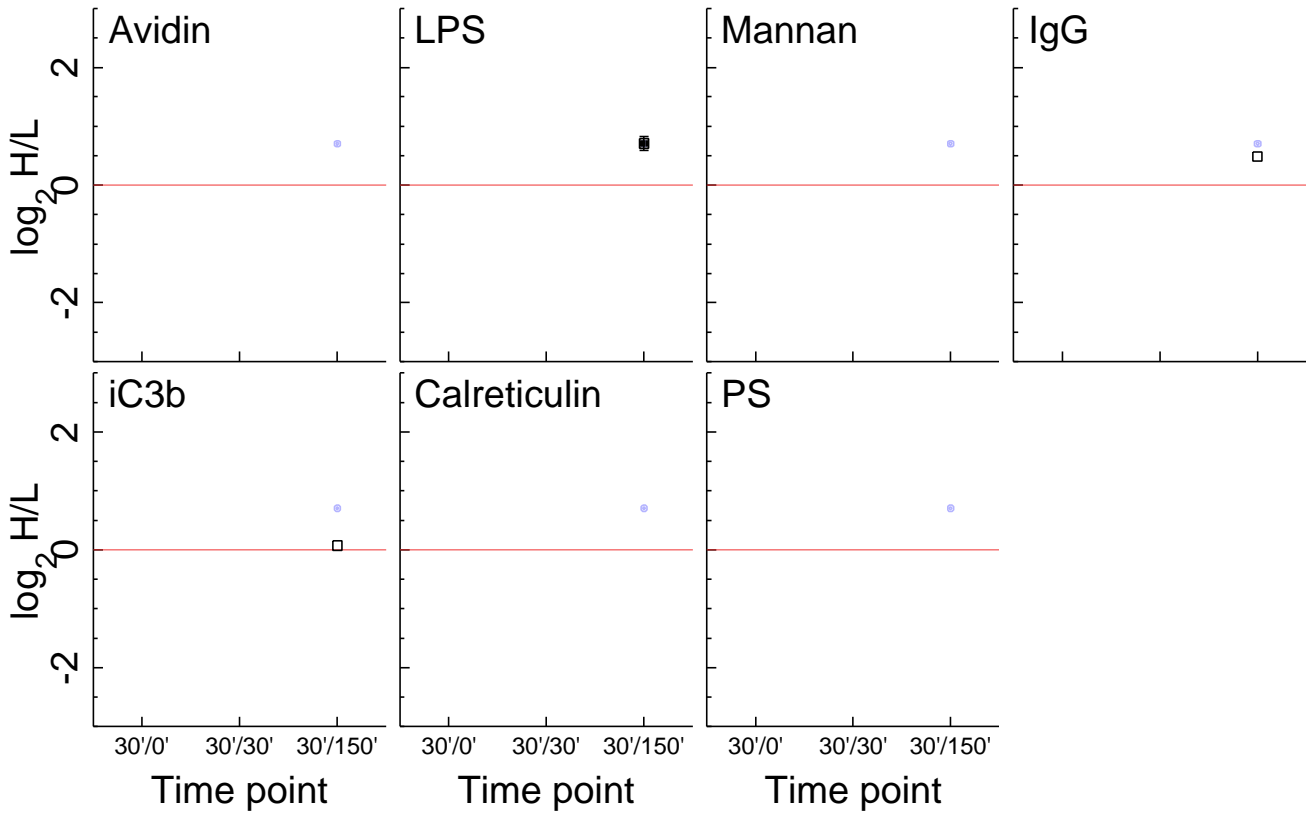

raver1 (Q9CW46)

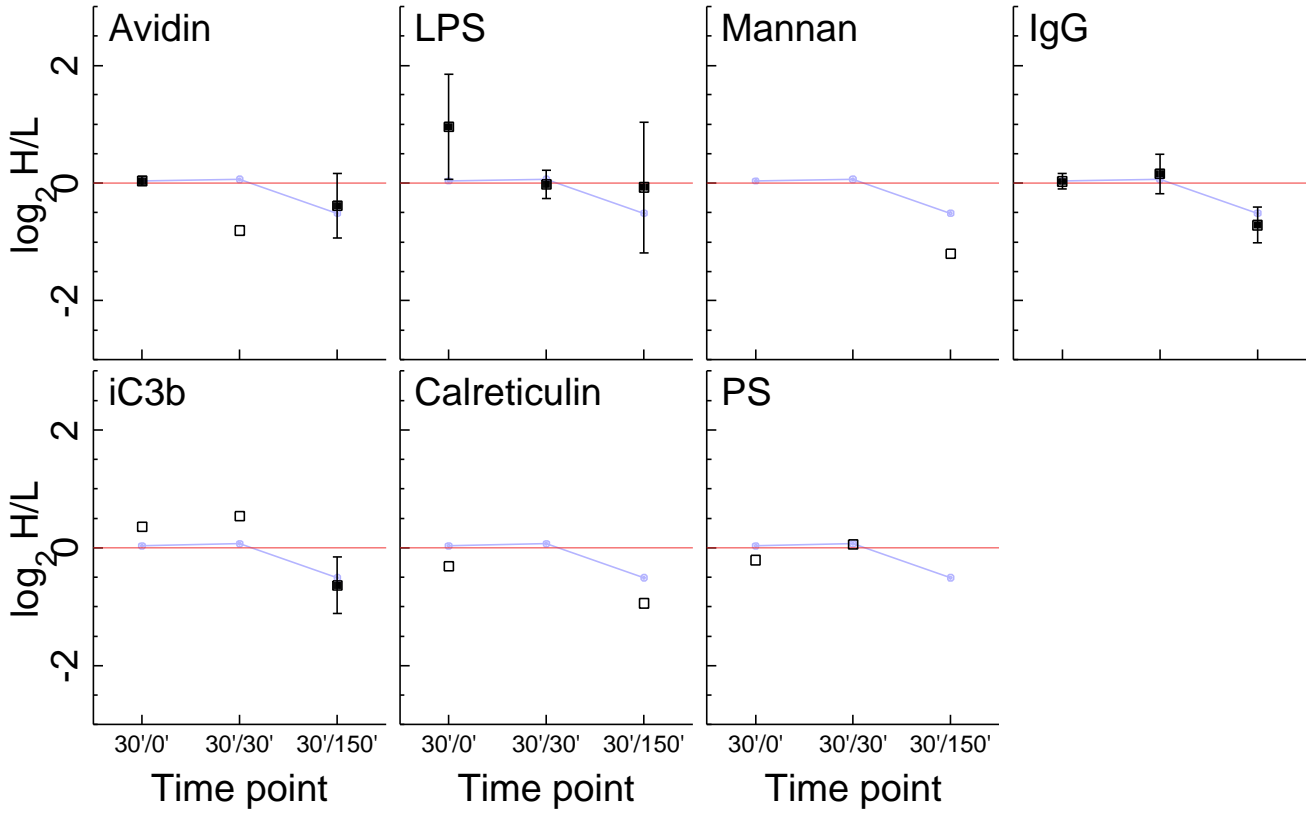

### rbbp4 (Q60972)

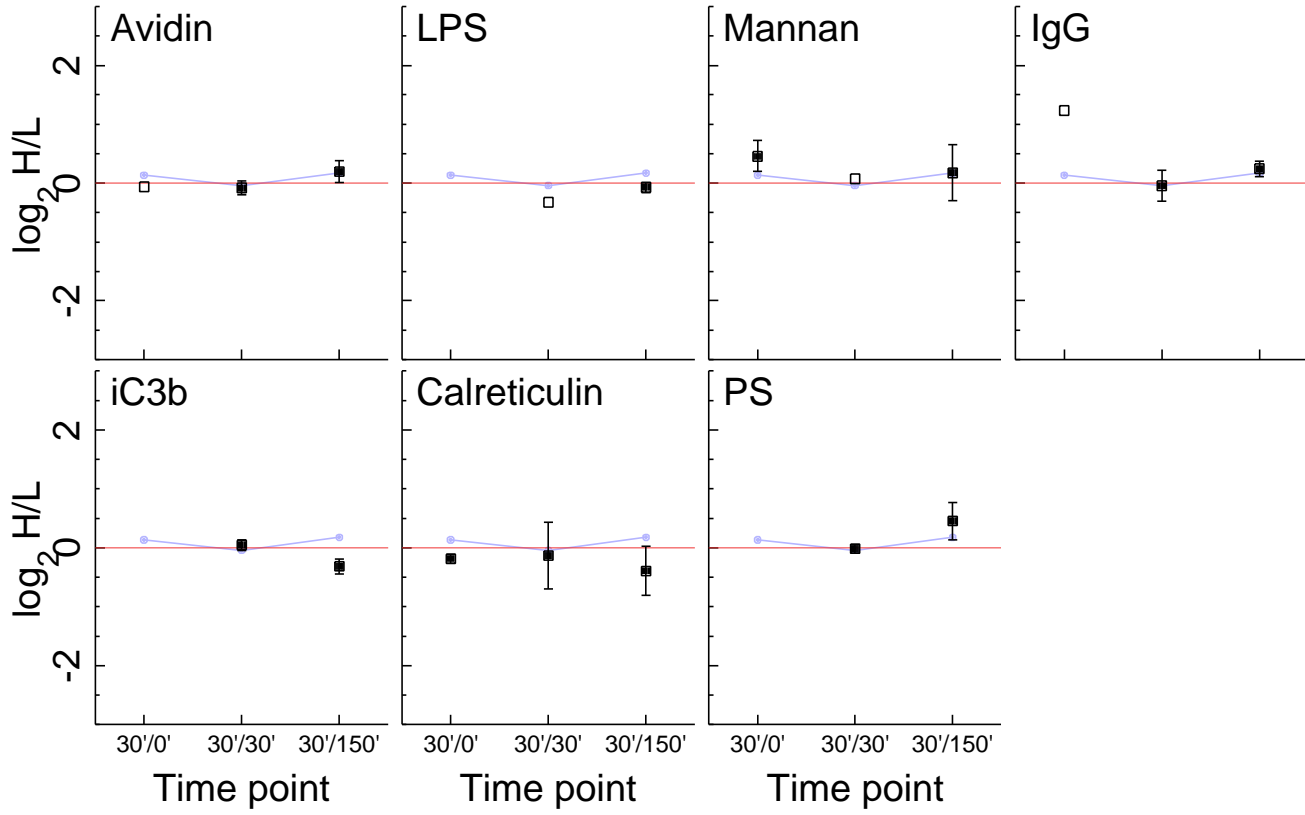

rbm25 (B2RY56)

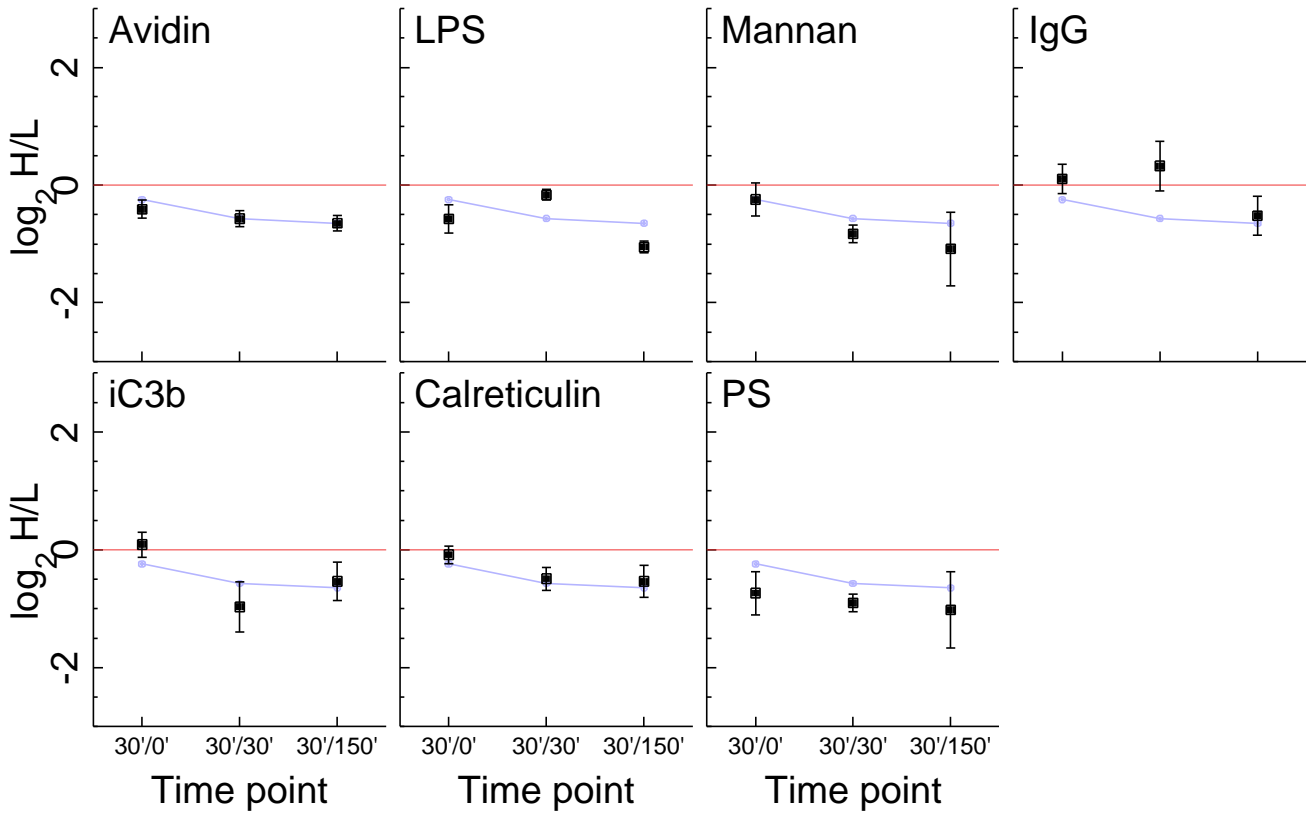

rbm3 (O89086)

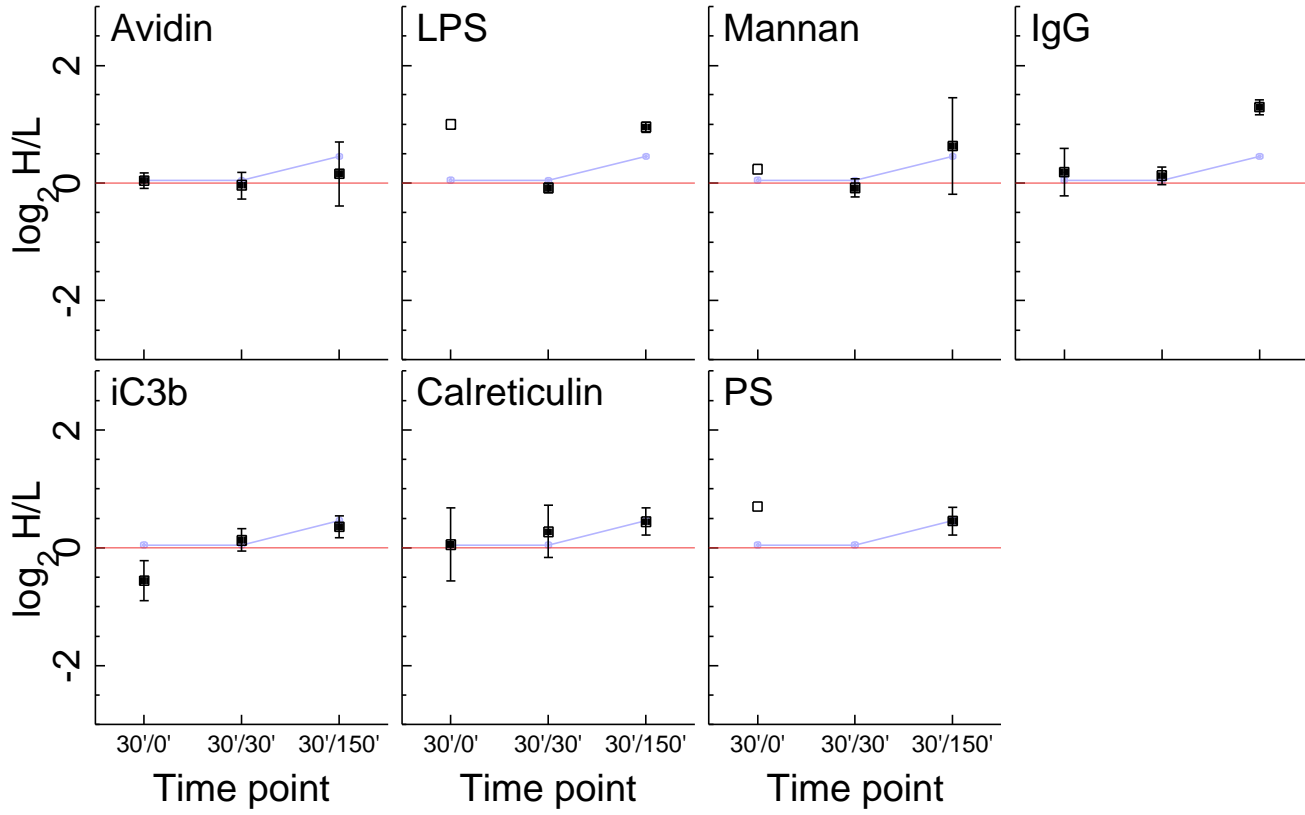

rbmx (Q9WV02)

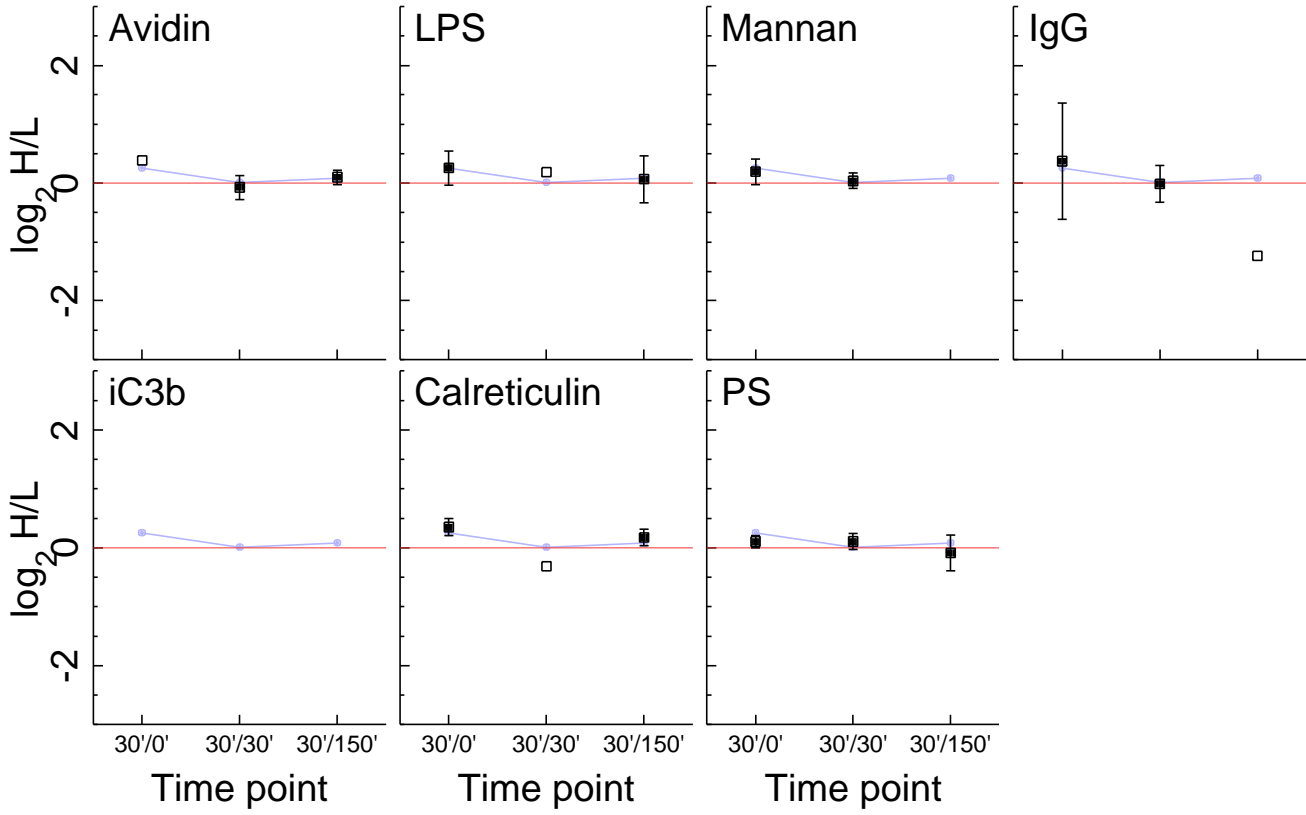

rbp4 (H7BWY6)

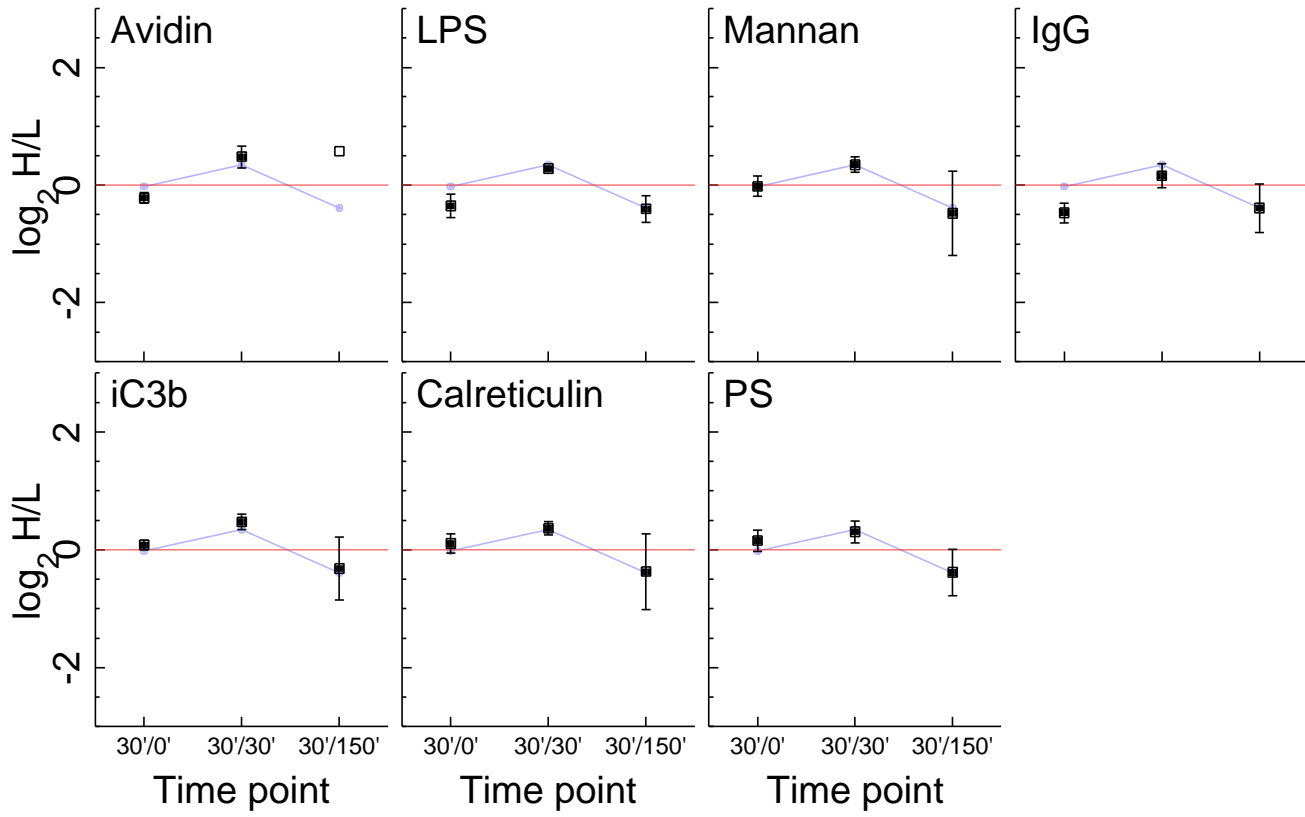

rcc1 (Q6PFB2)

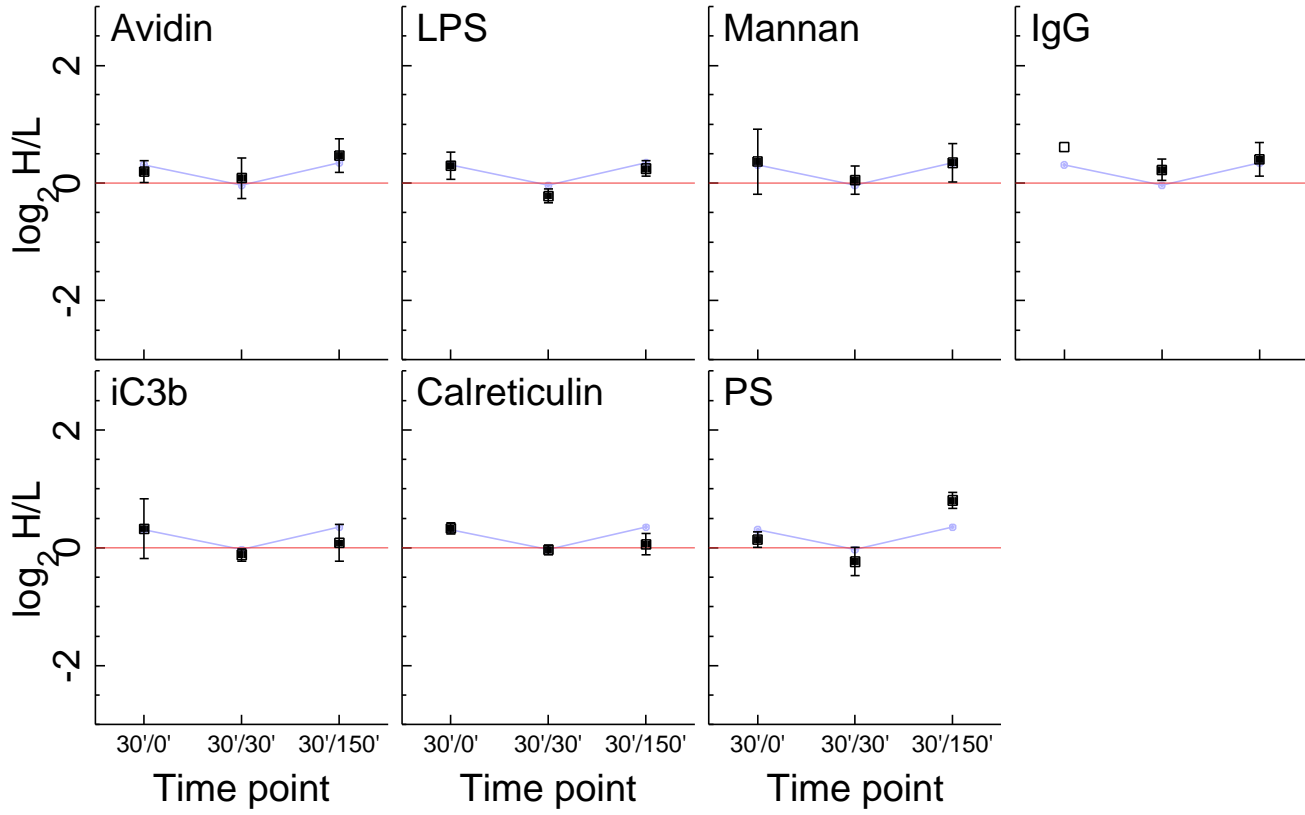



rcn2 (Q8BP92)

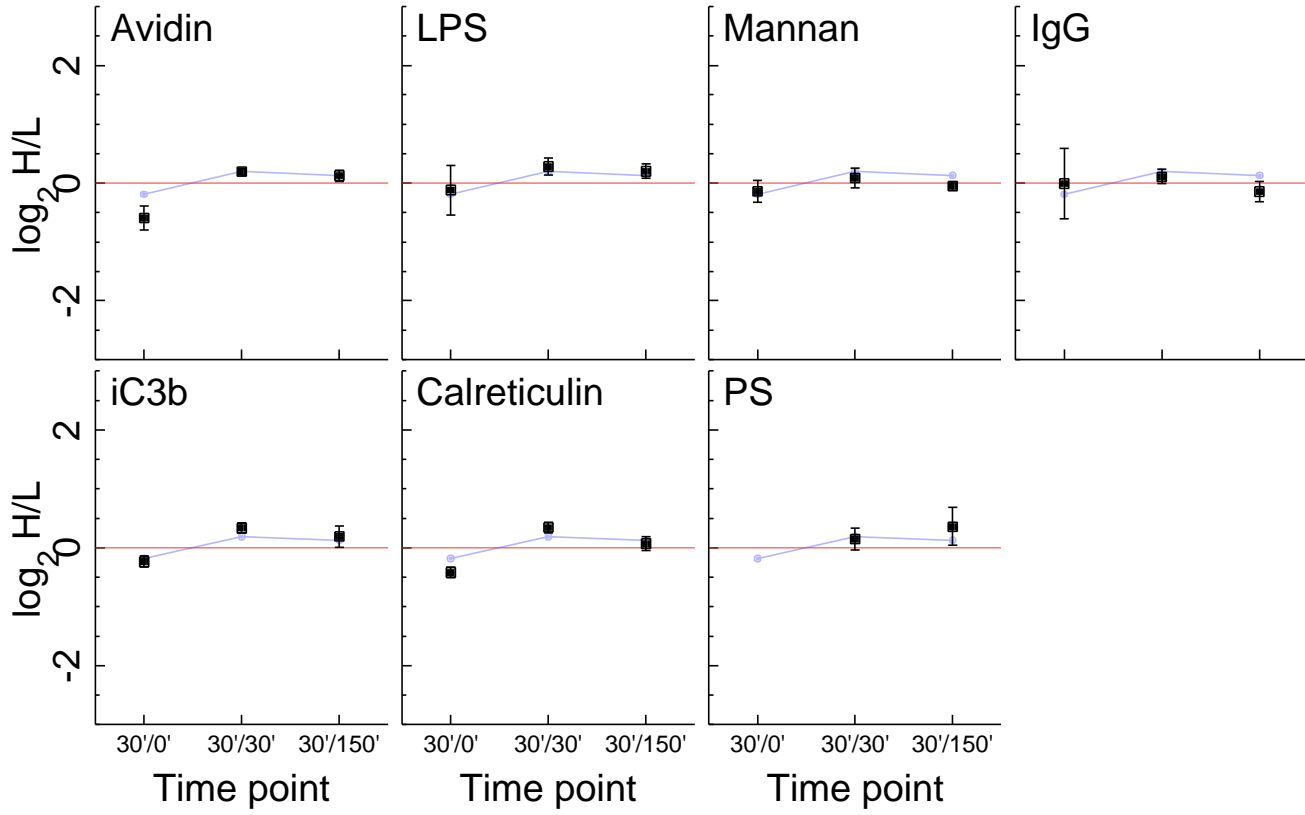

rcor1 (Q8CFE3)

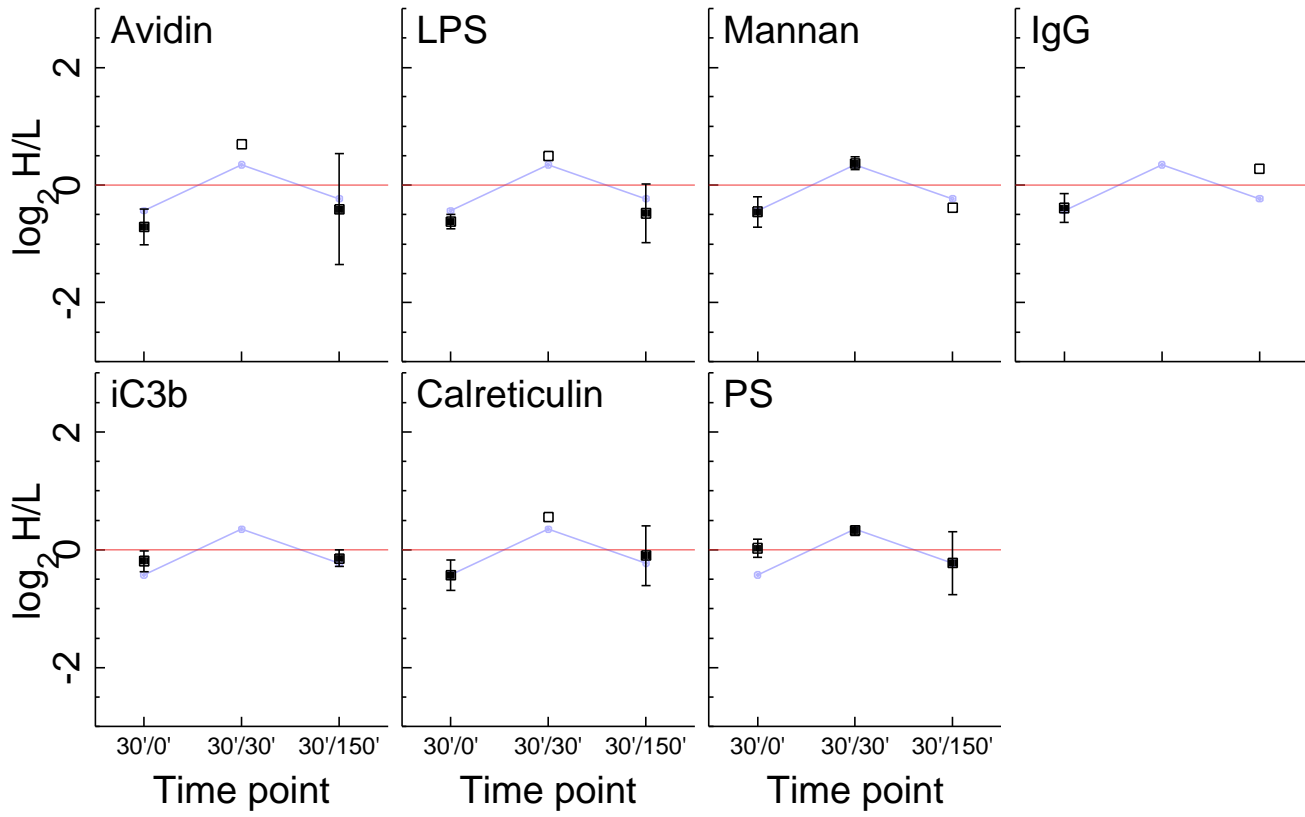

rdh11 (Q9QYF1)

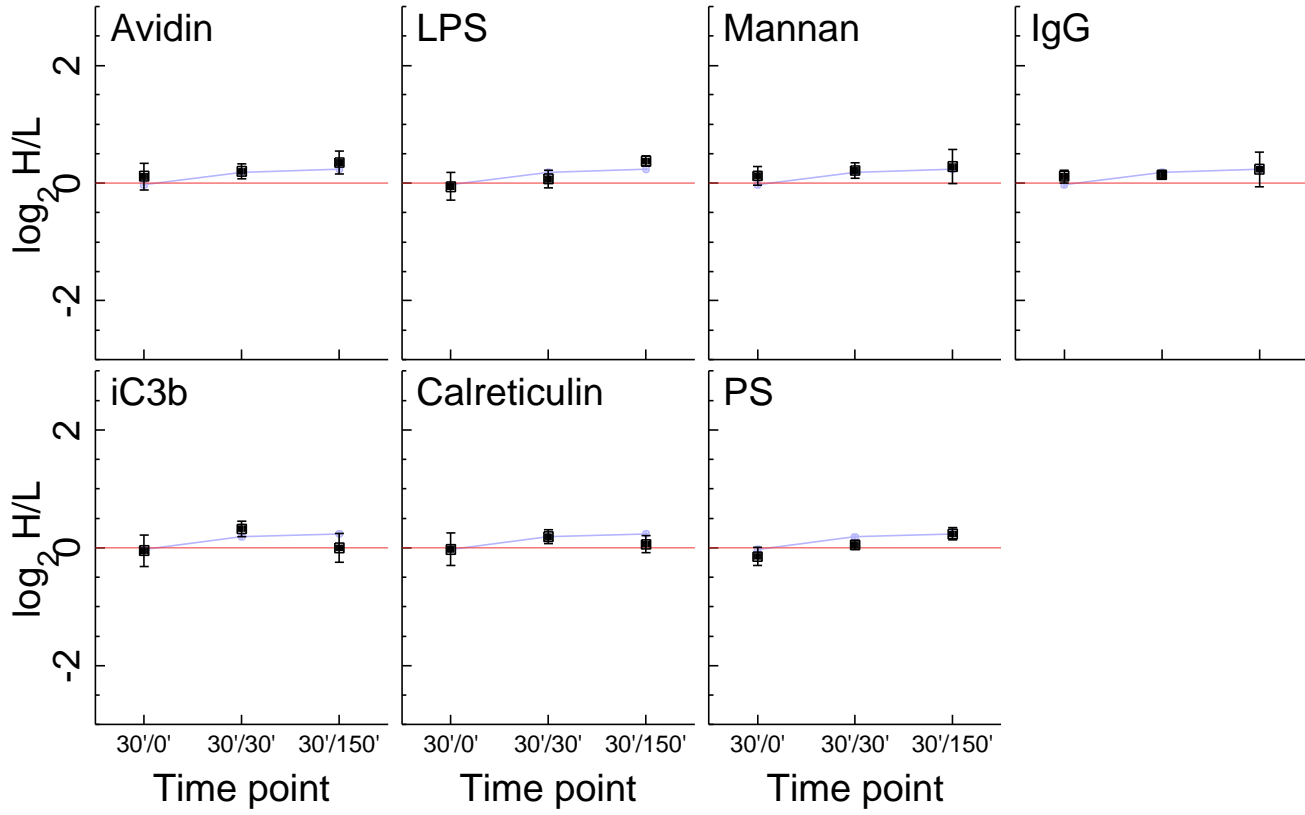

### rdh14 (Q9ERI6)

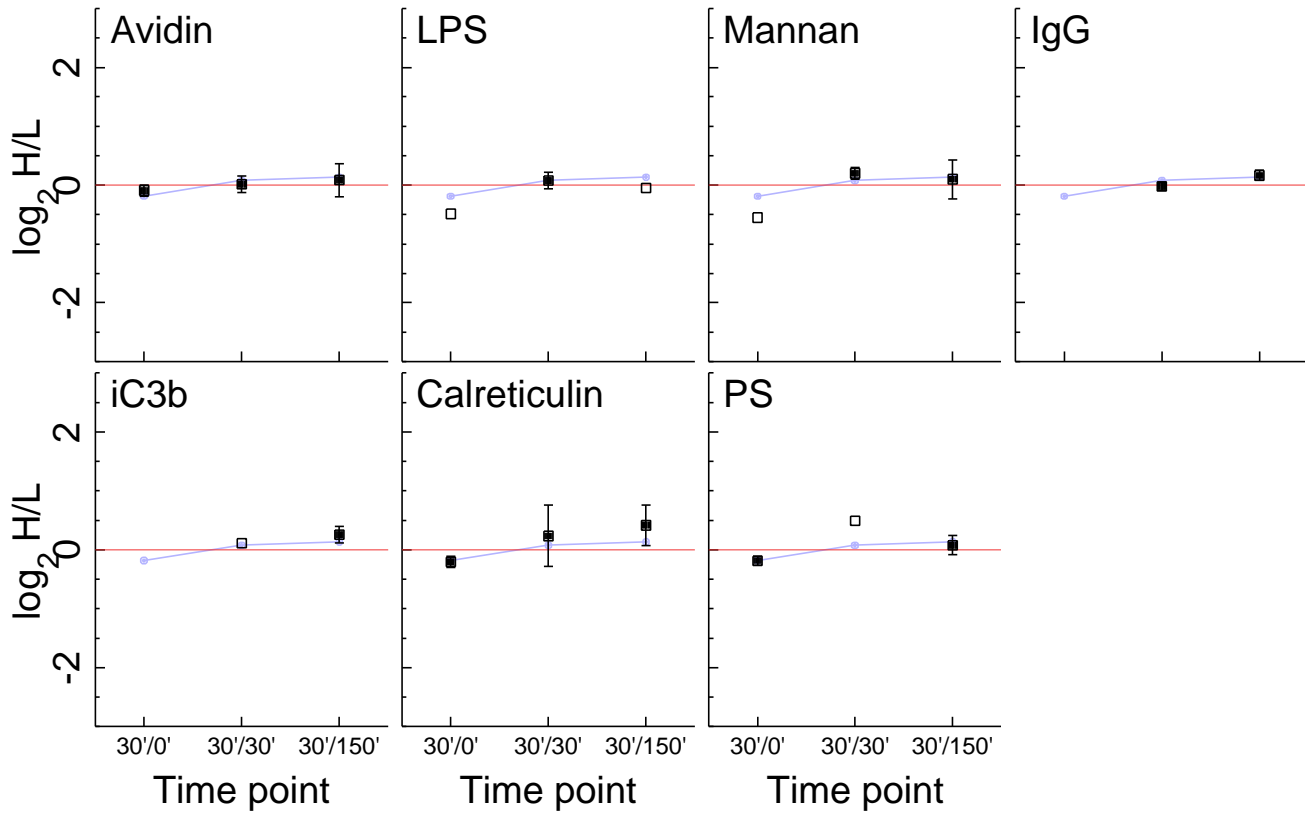

rdx (P26043)

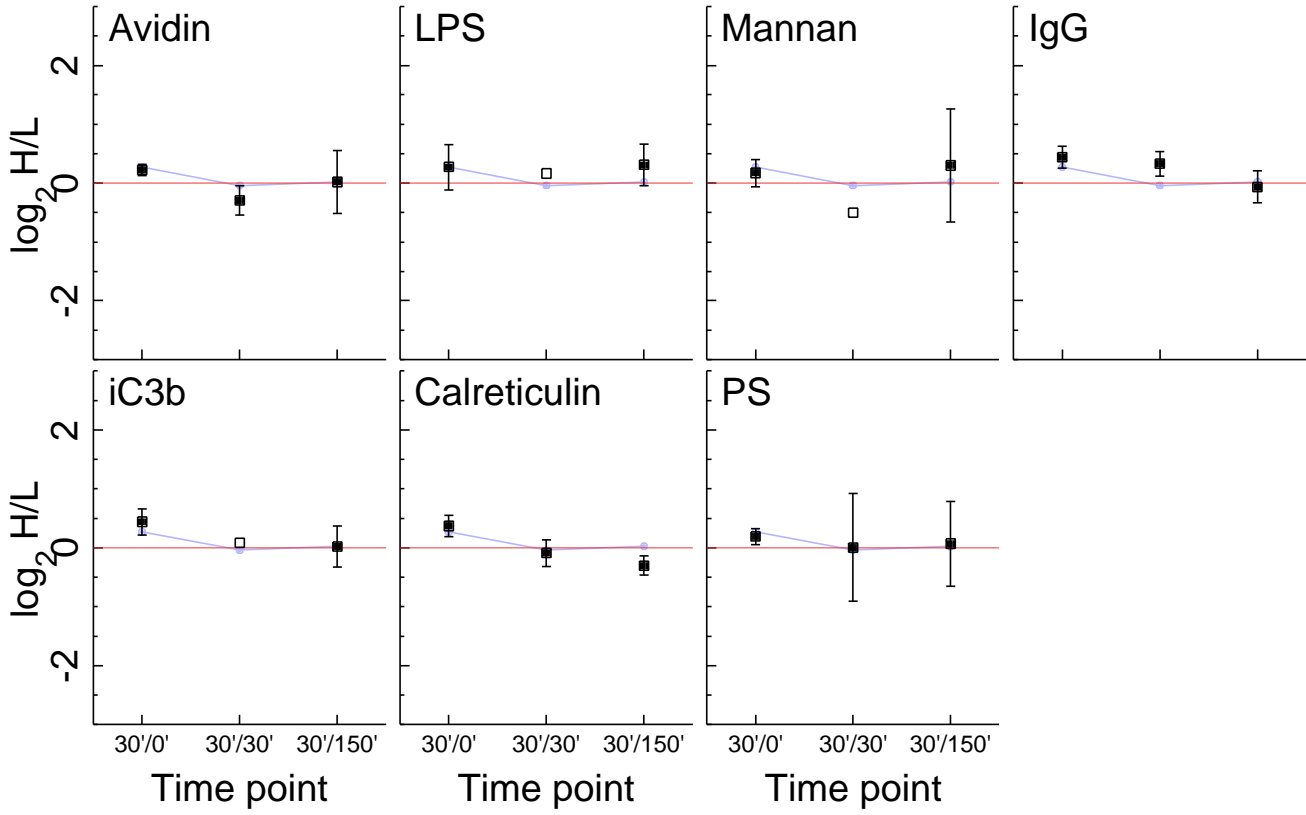

reep5 (G3X8R0)

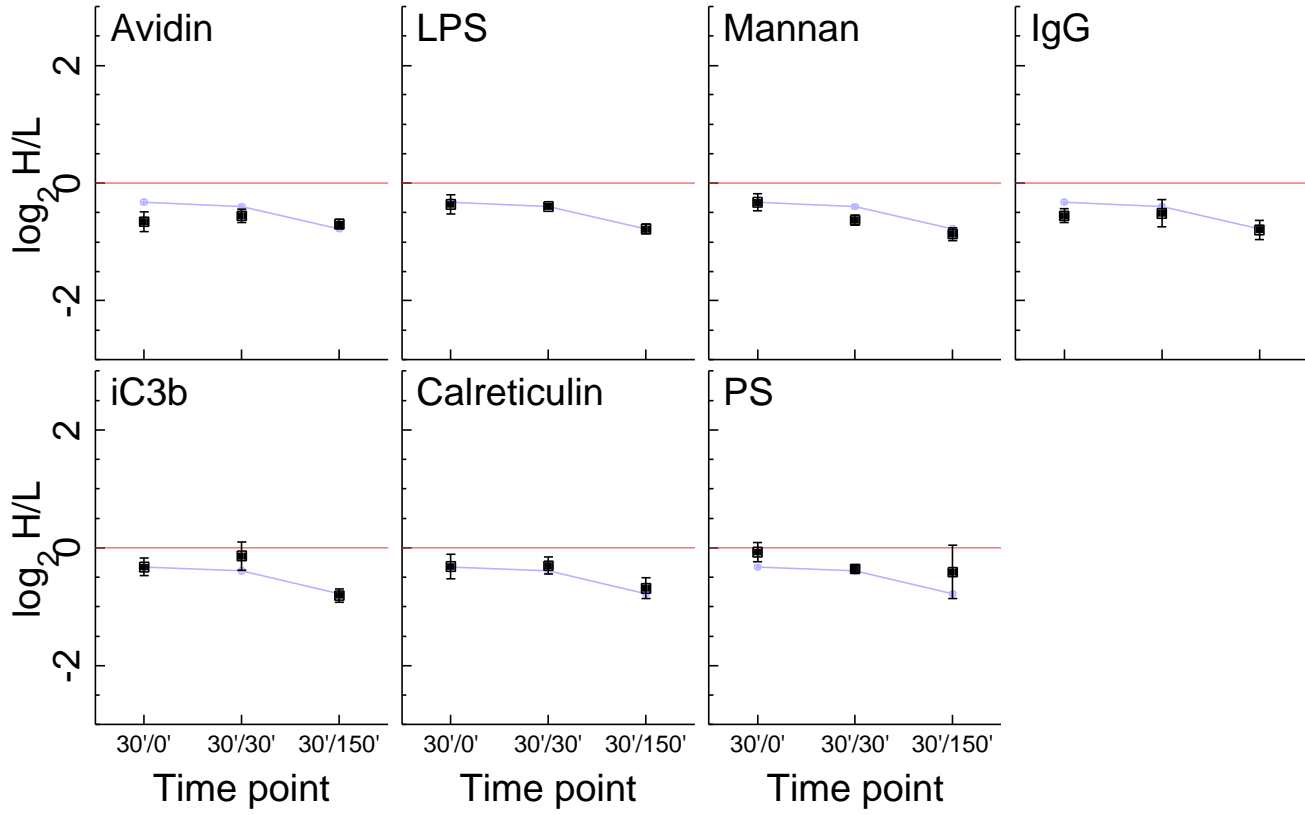

rer1 (Q9CQU3)

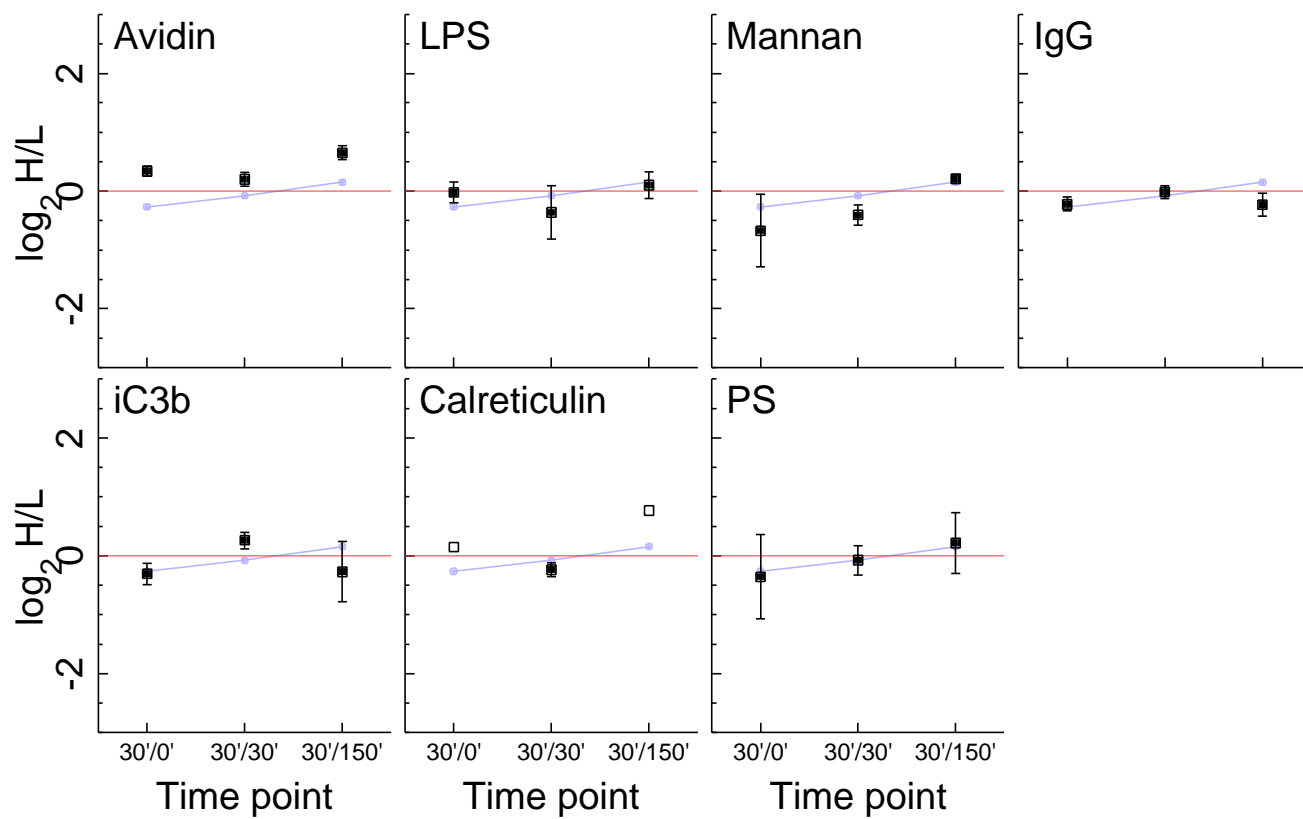

### rftn1 (Q6A0D4)

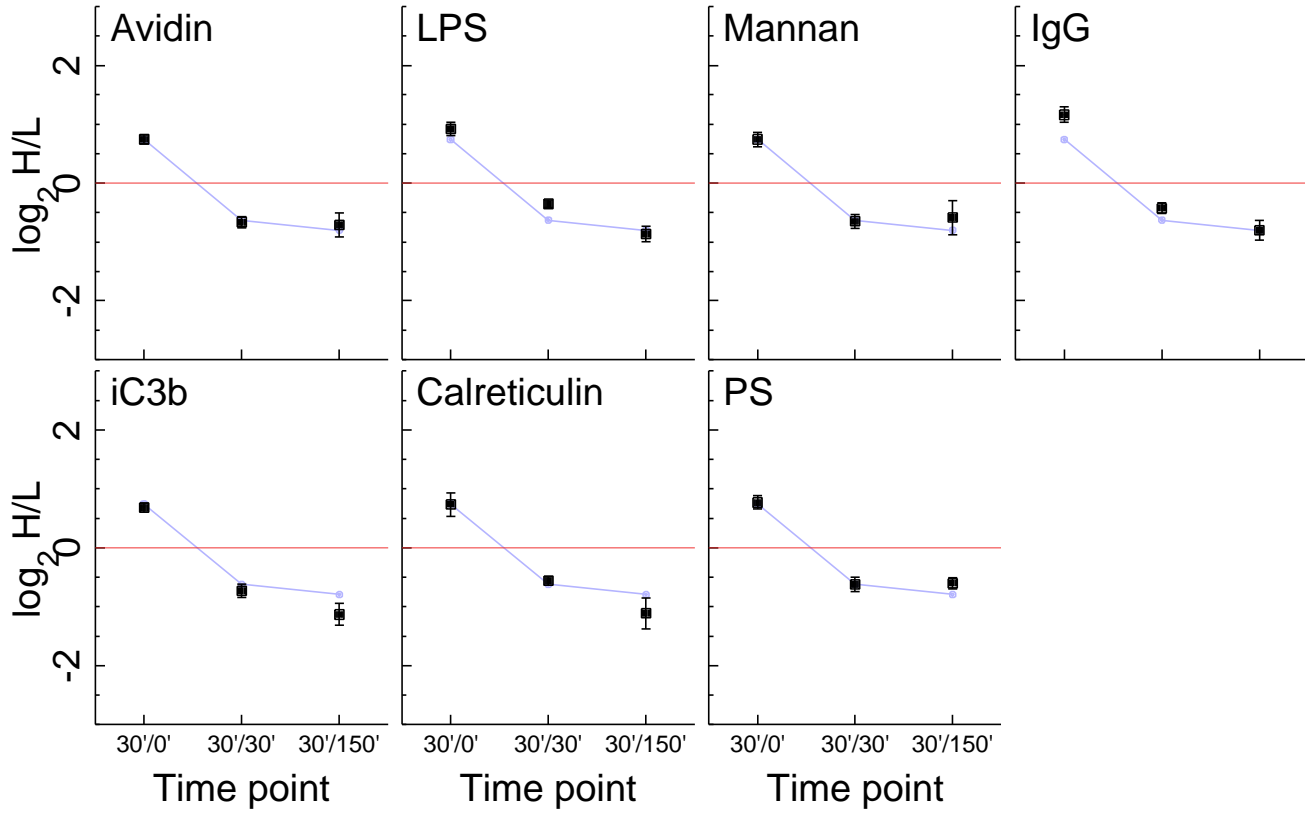



rgs10 (Q9CQE5)

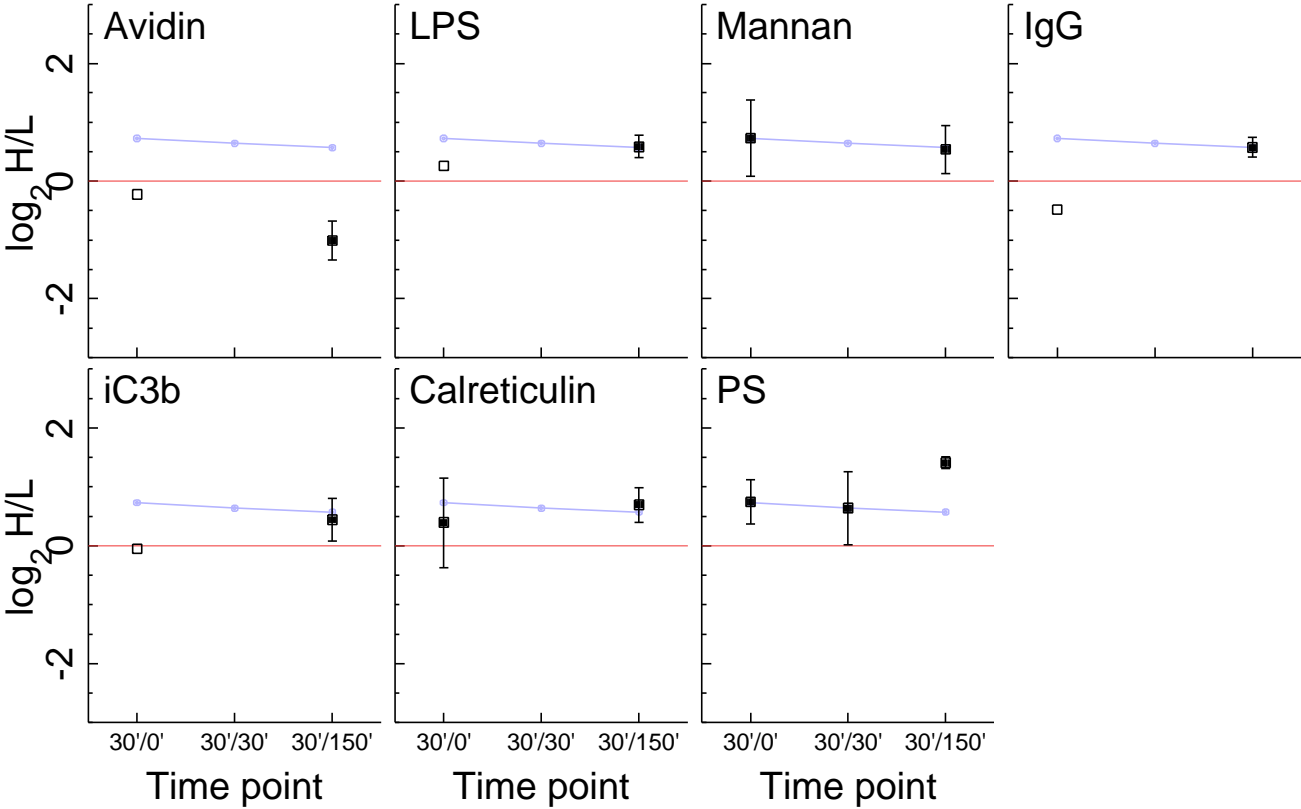

rgs18 (Q99PG4)

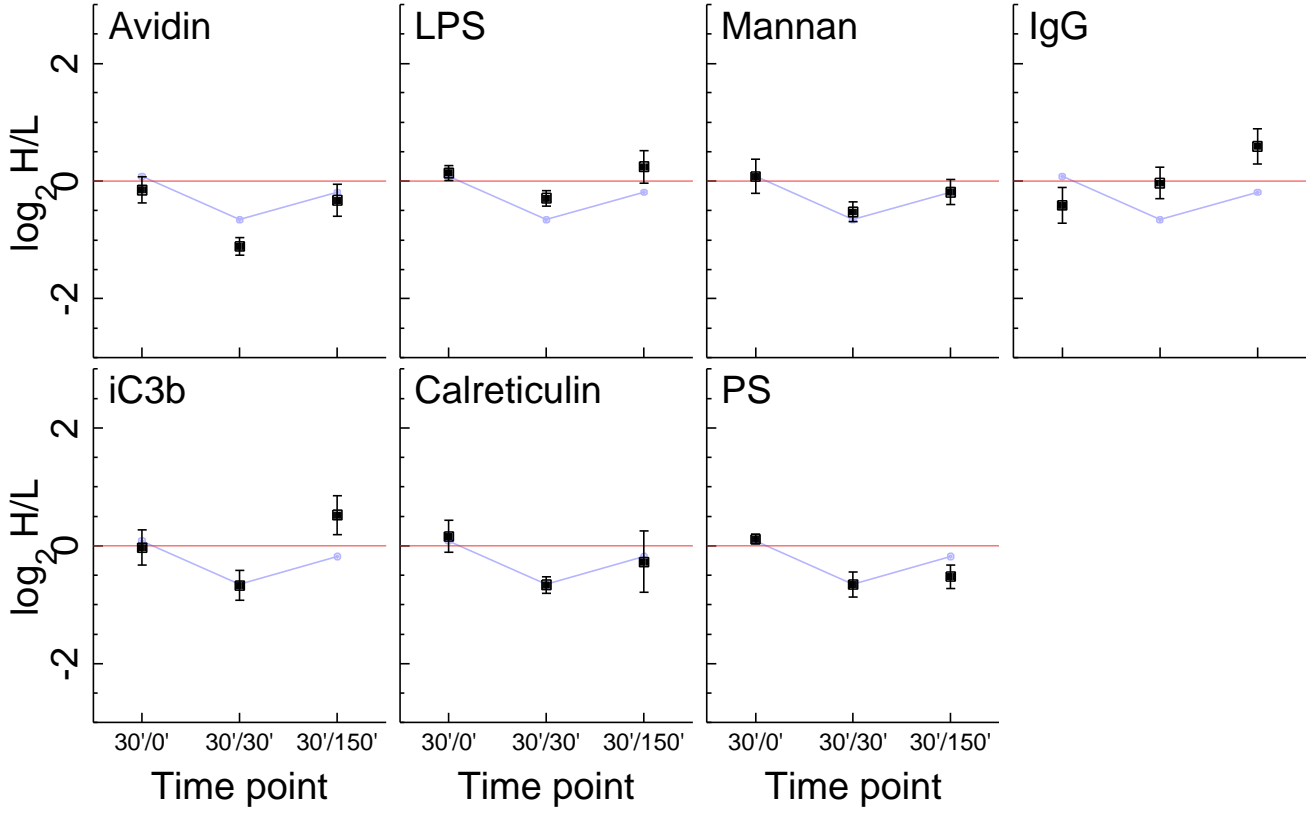

### rgs19 (B7ZCT1)

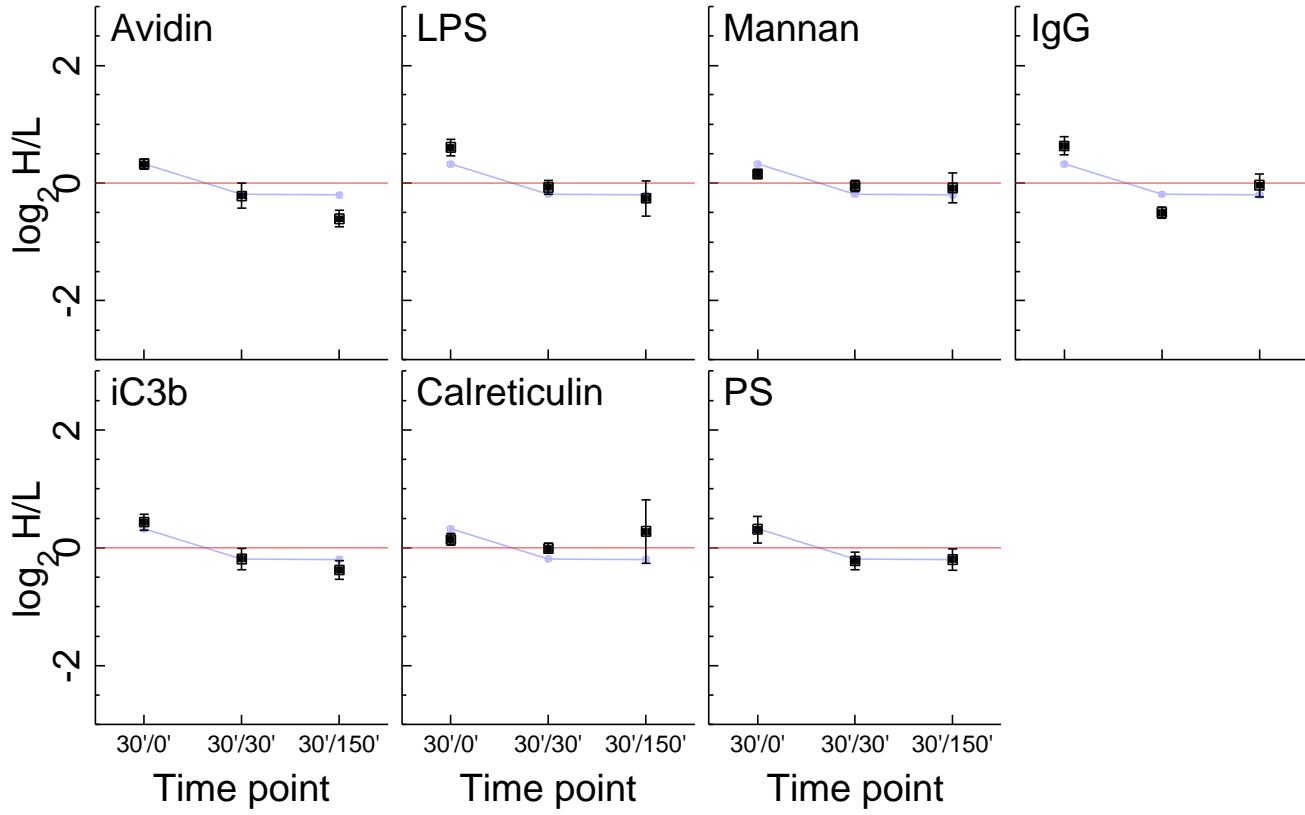

### rgs1 (Q9JL25)

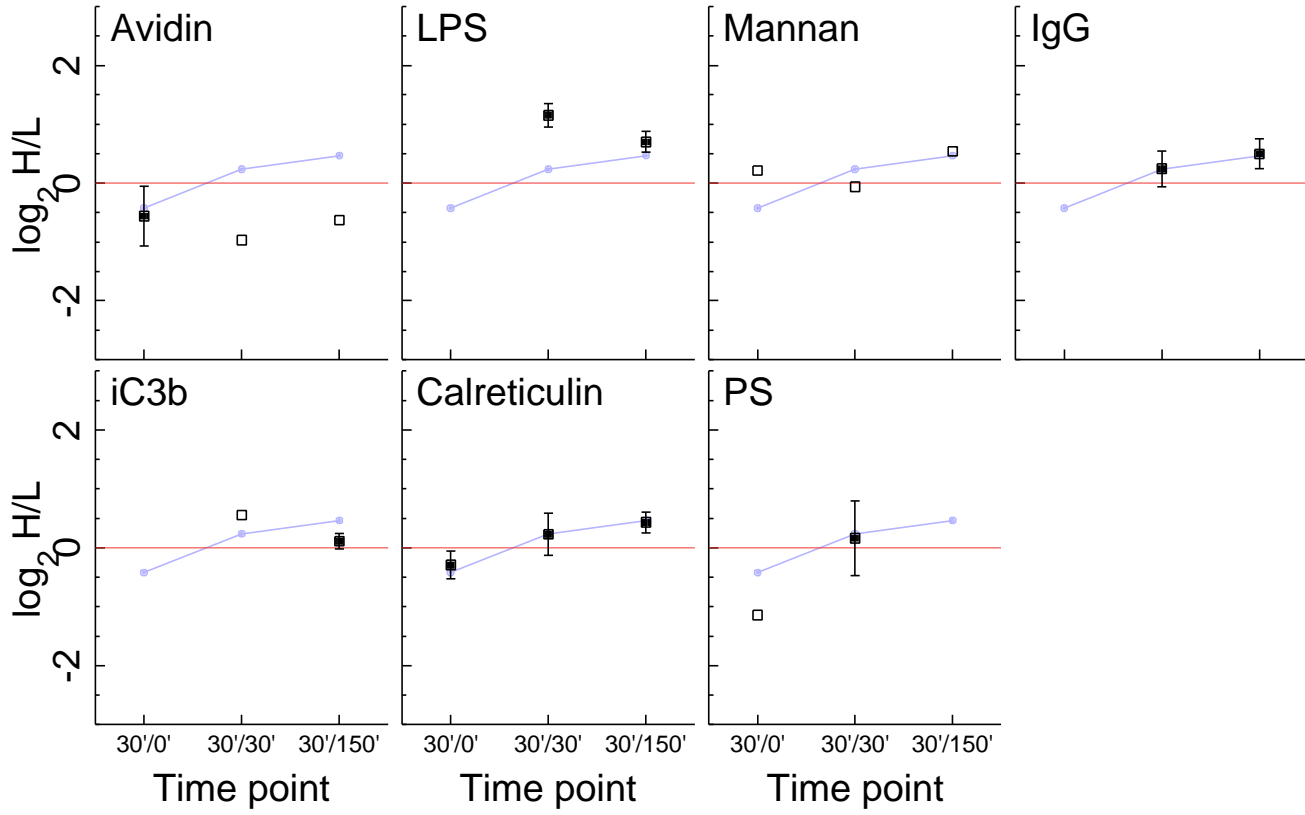

rgs3 (Q9DC04)

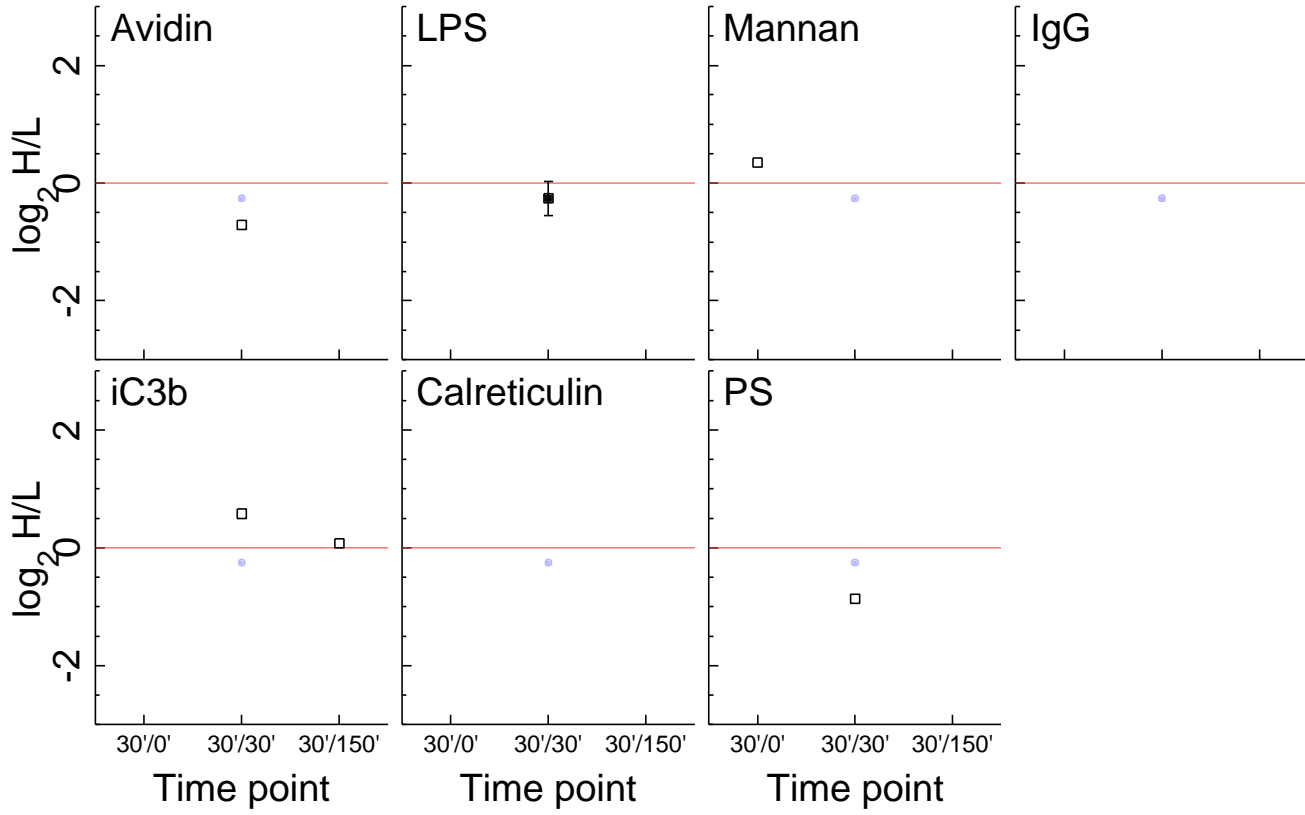

### rhbdf2 (Q80WQ6)

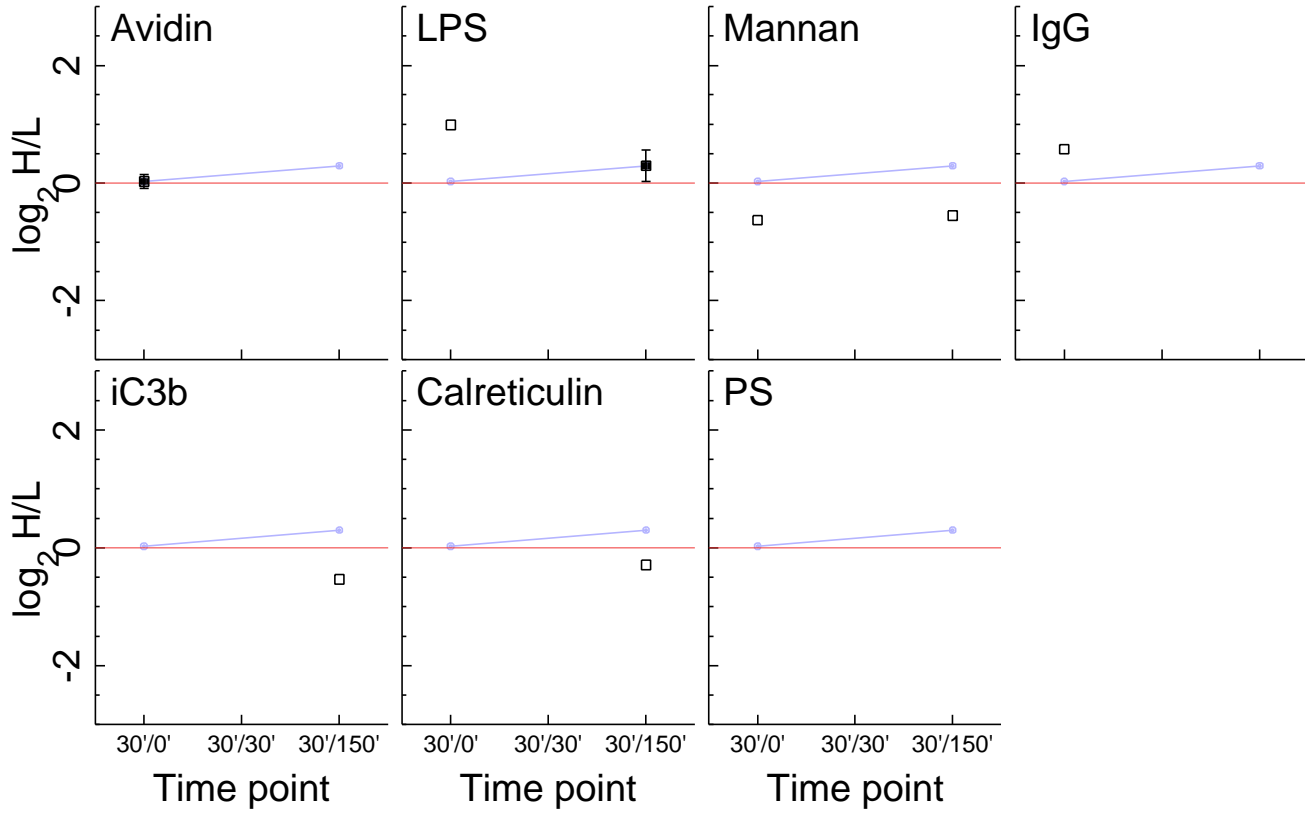

### rhoa (Q9QUI0)

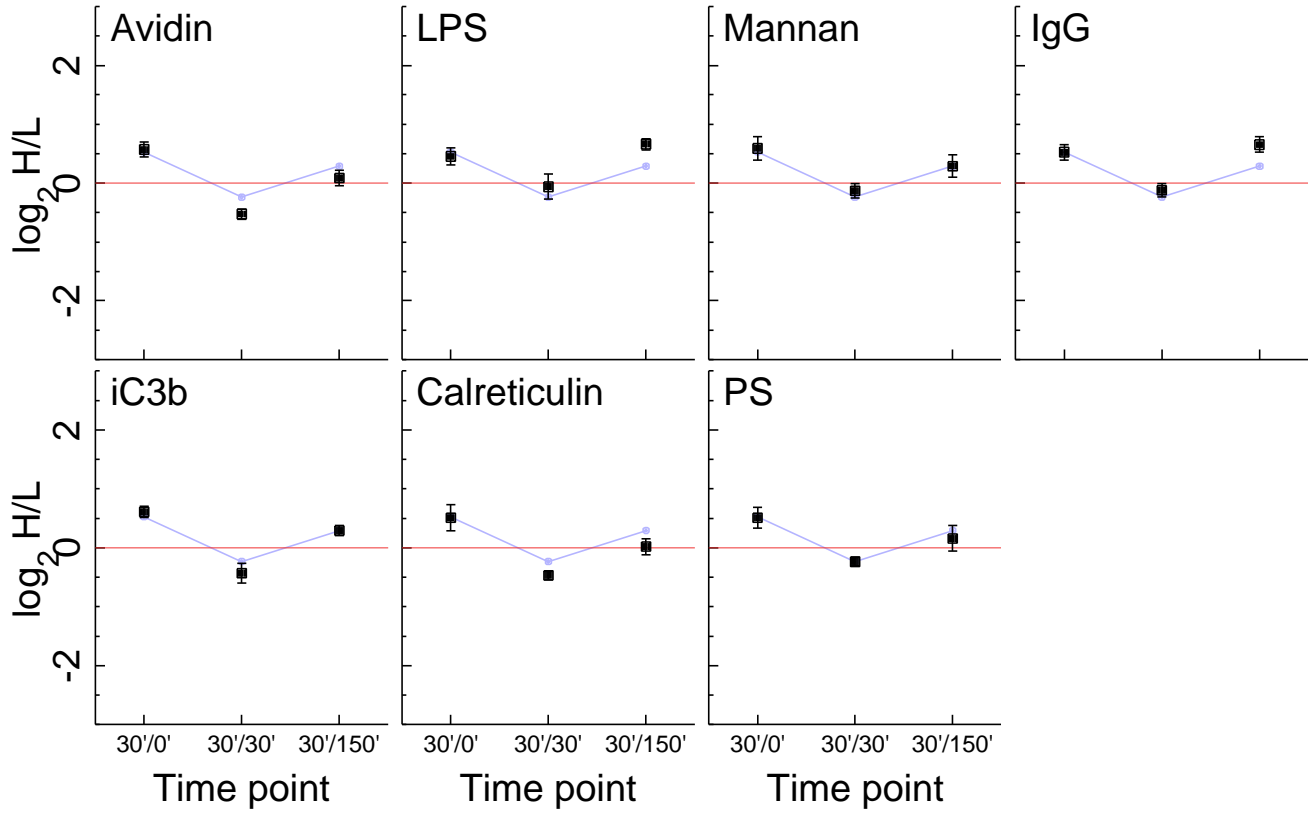

rhob (P62746)

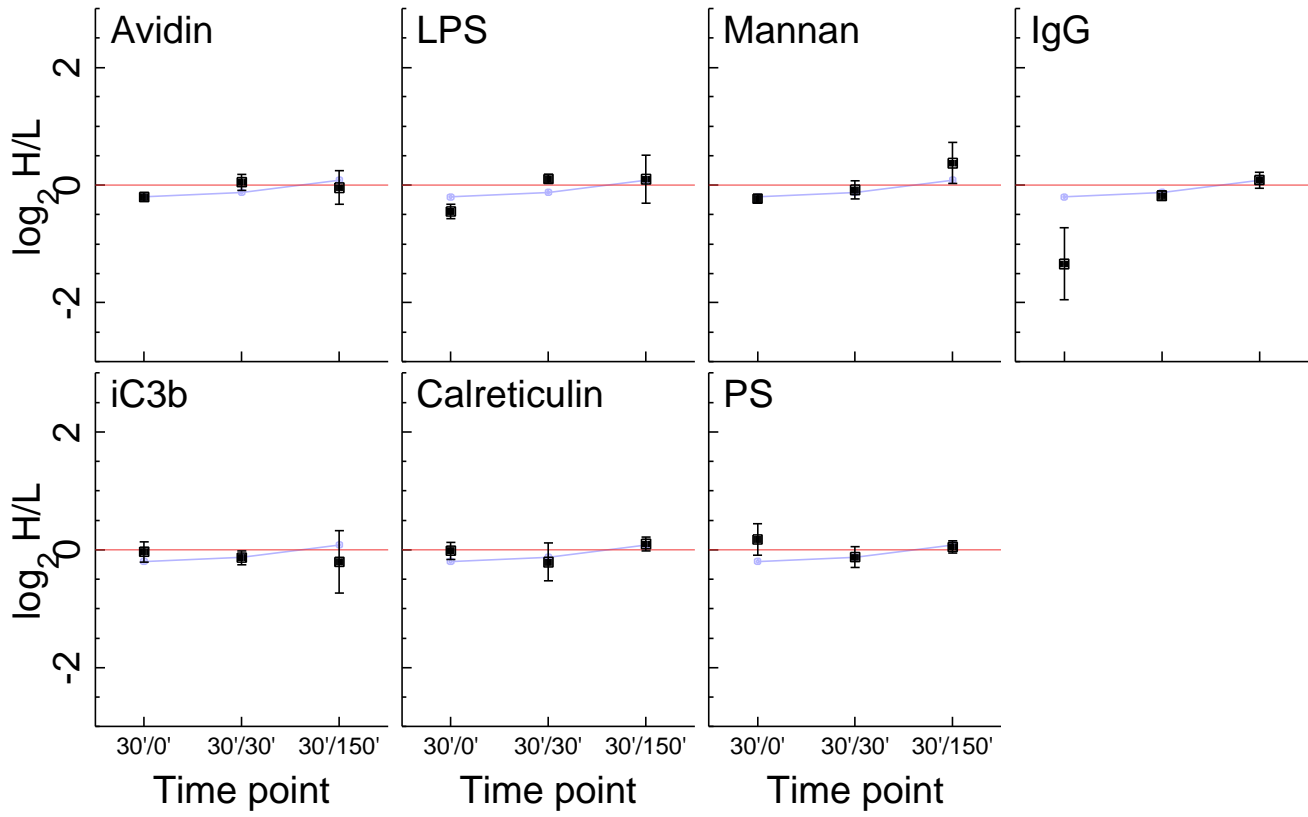



### rhog (P84096)

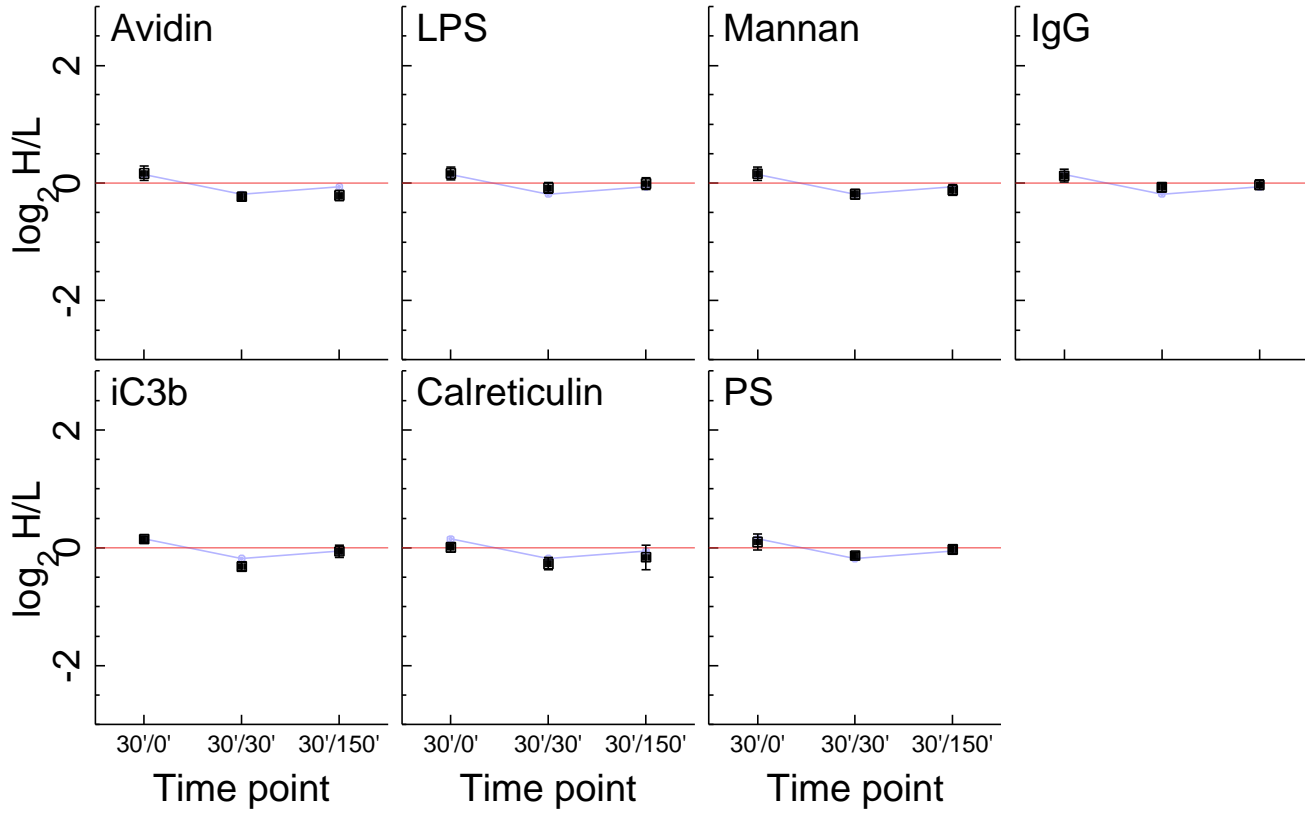

### ripk1 (Q60855)

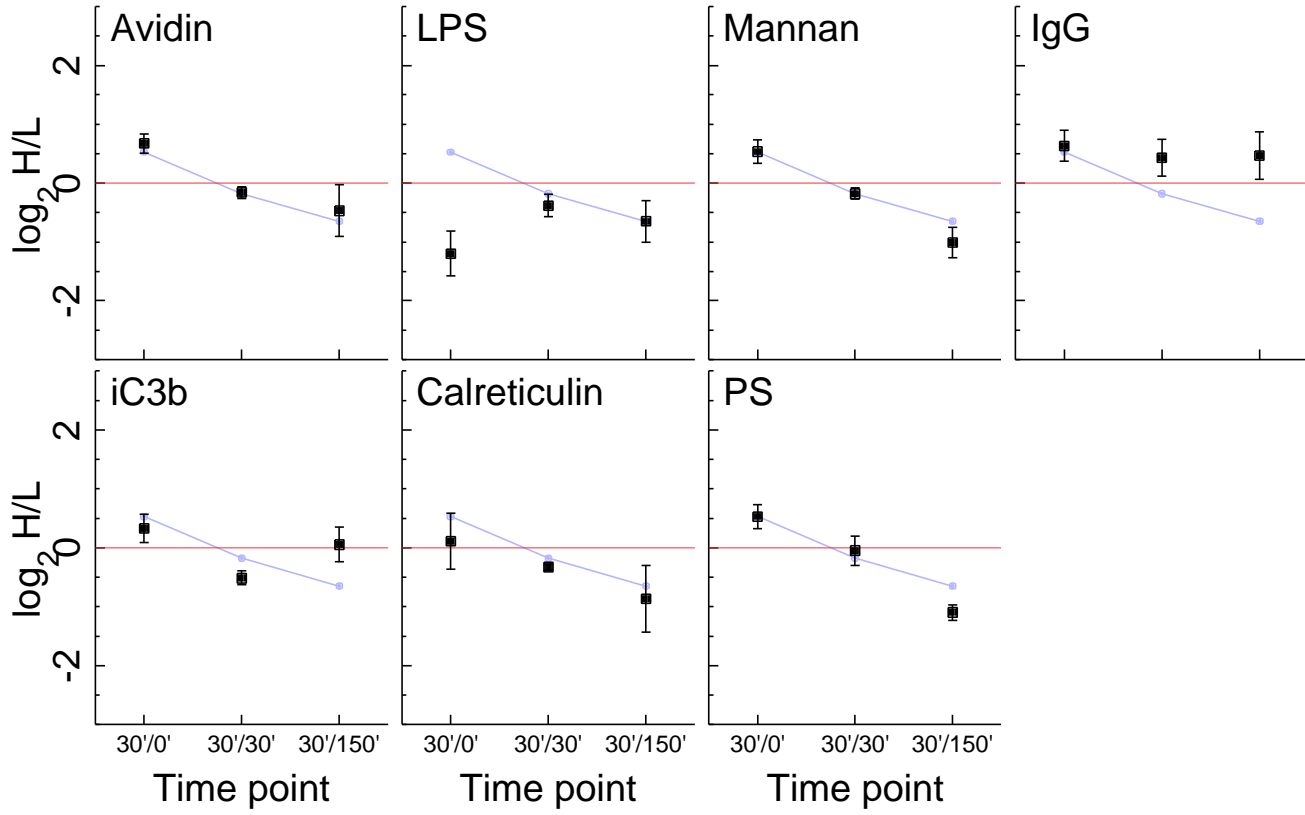

### ripk3 (G3X8V8)

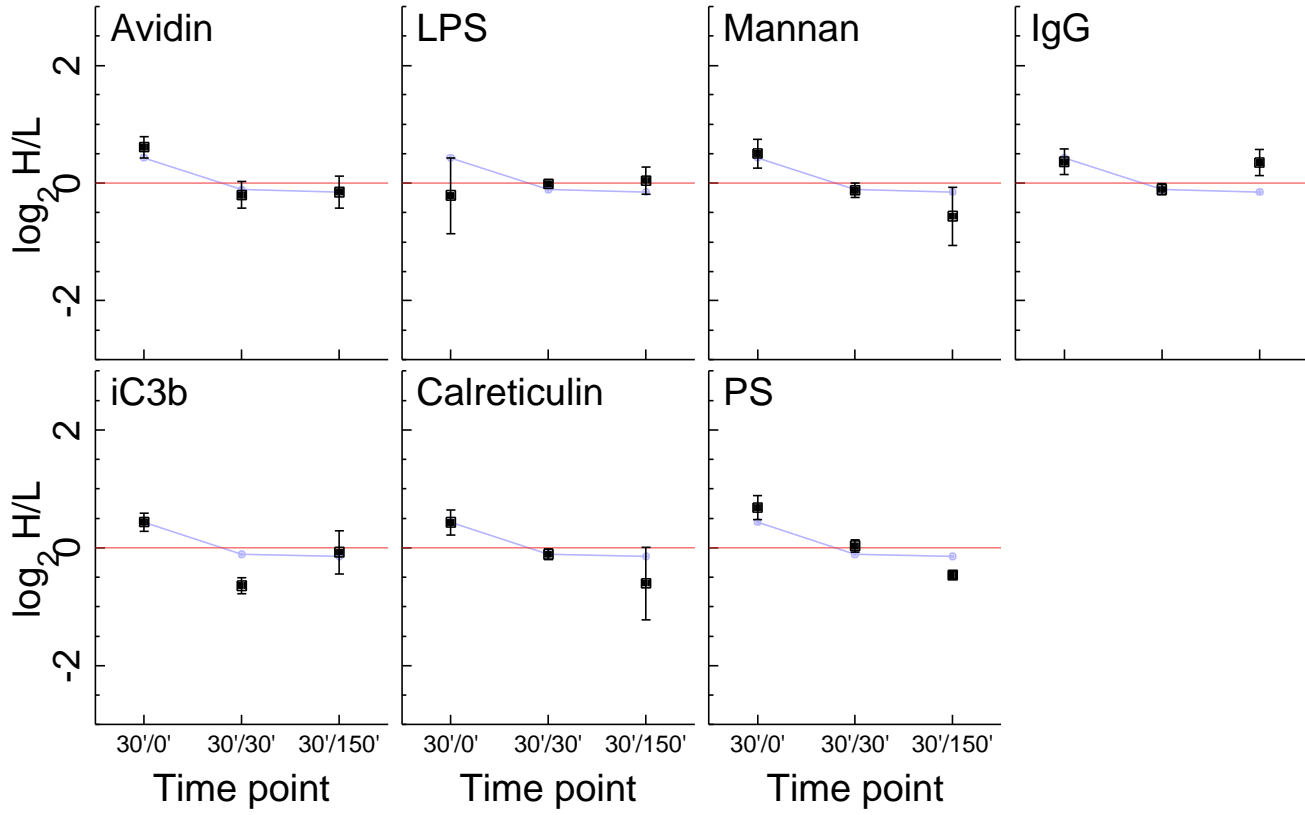

rit1 (P70426)

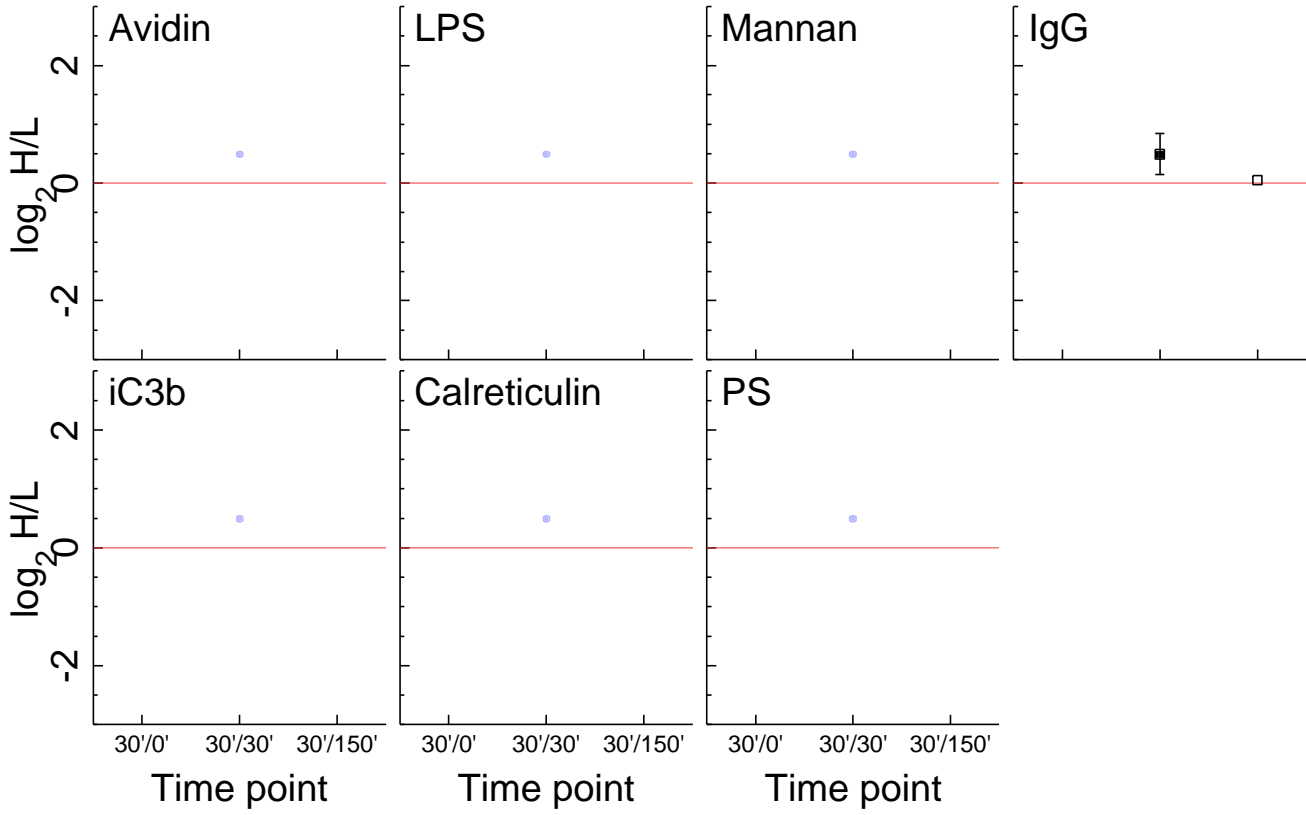

### rnaset2 (Q9CQ01)

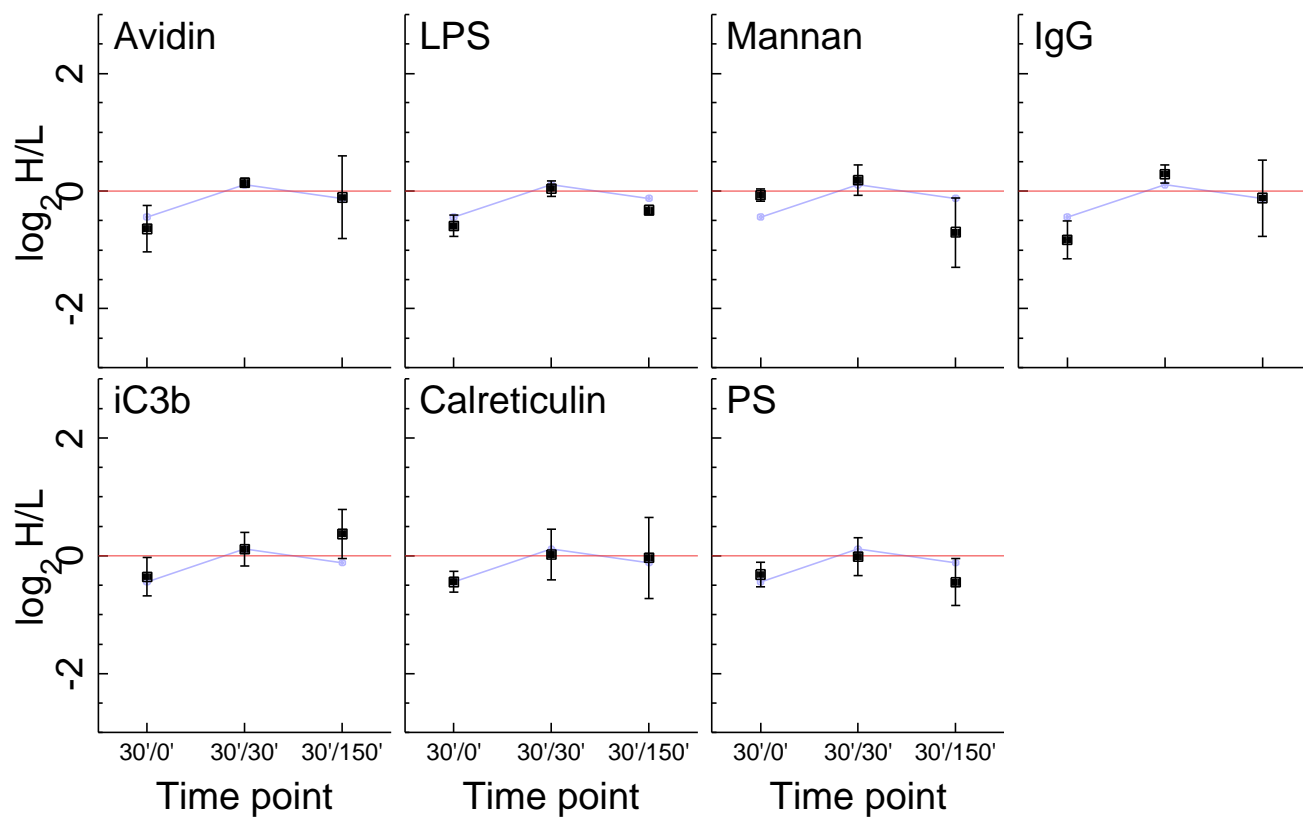

rnd1 (Q8BLR7)

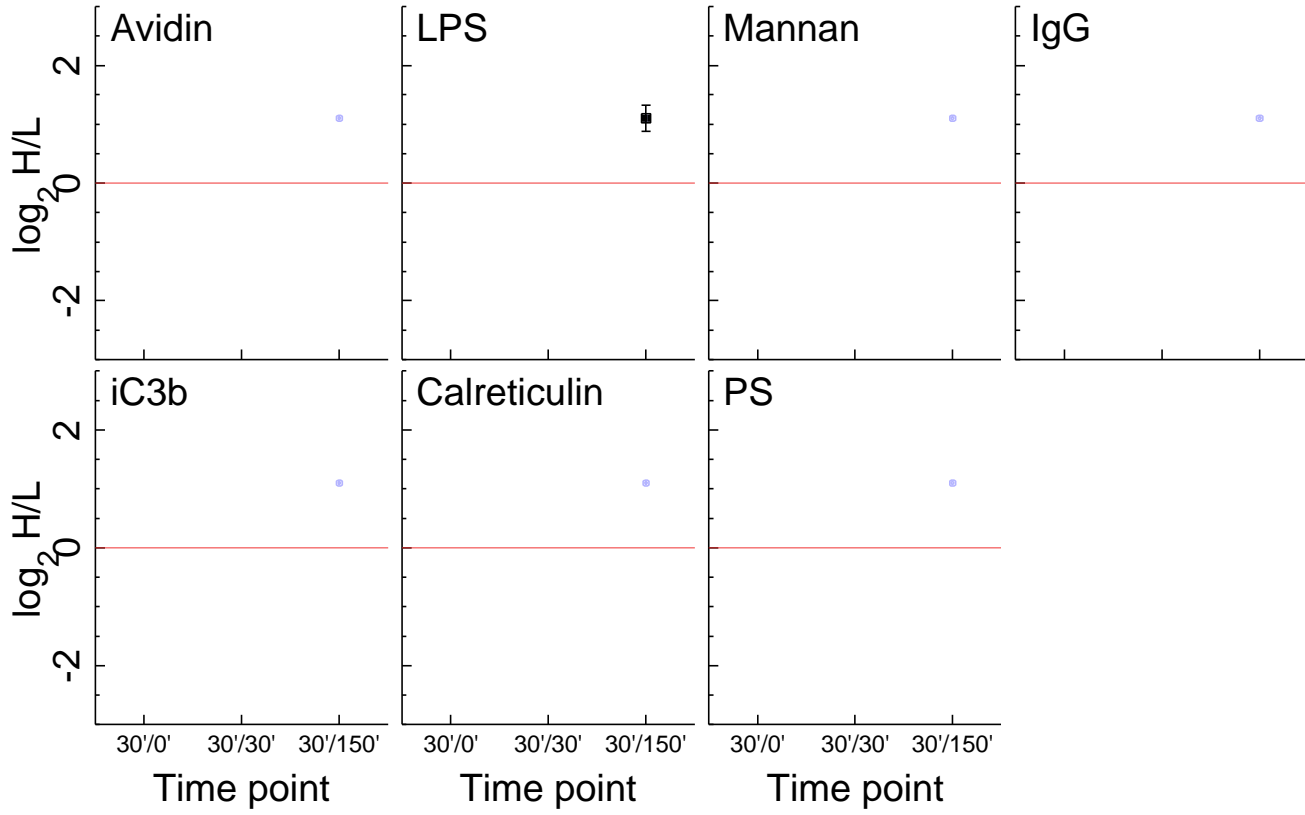

rnd3 (P61588)

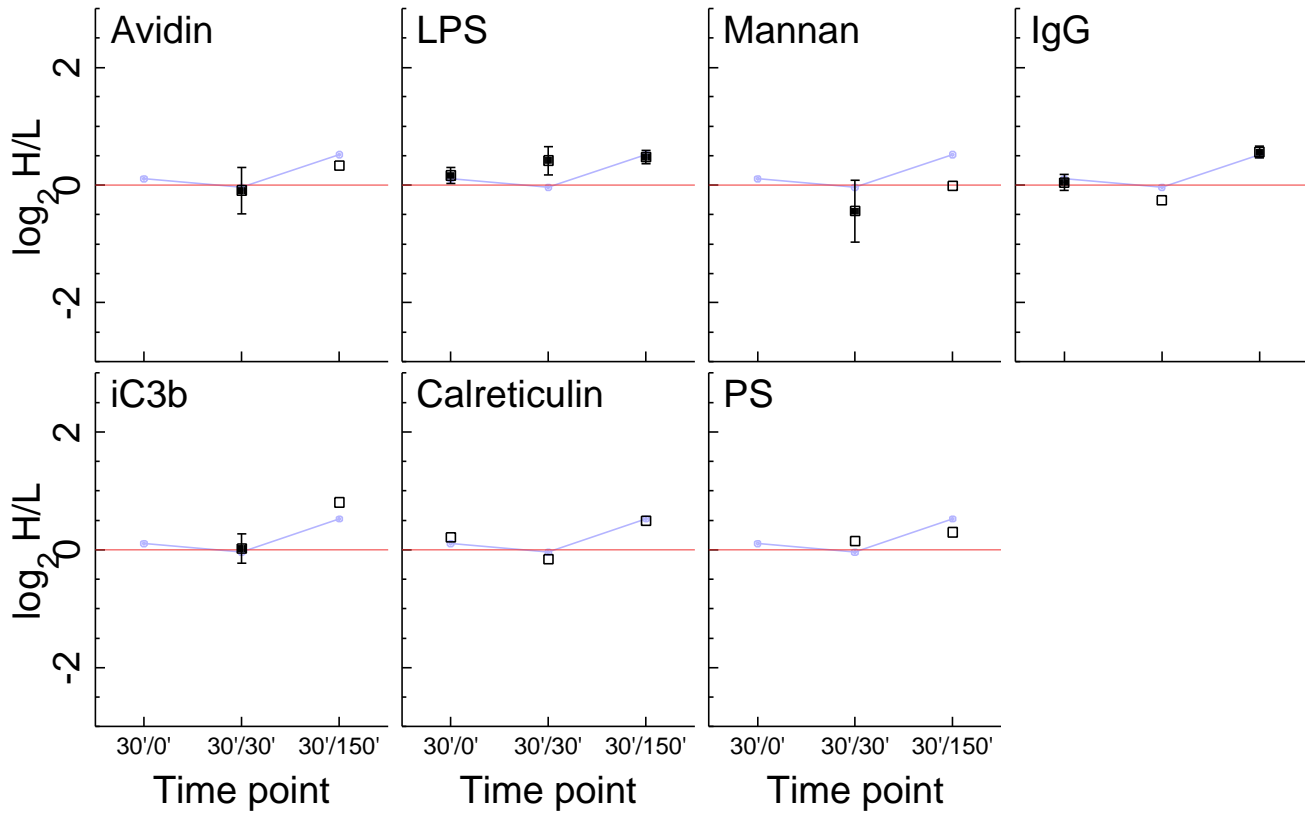

rnf128 (Q9D304)

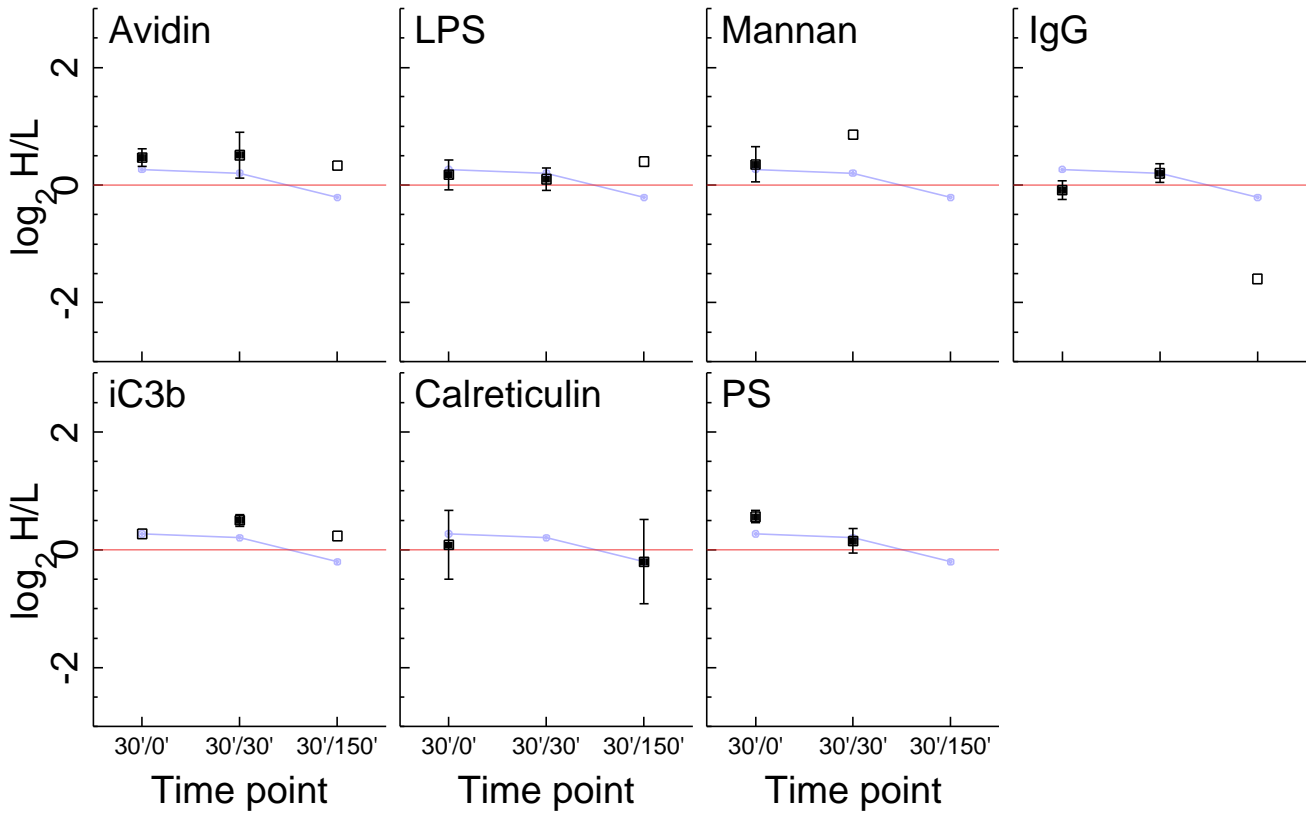



rnf130 (Q8VEM1)

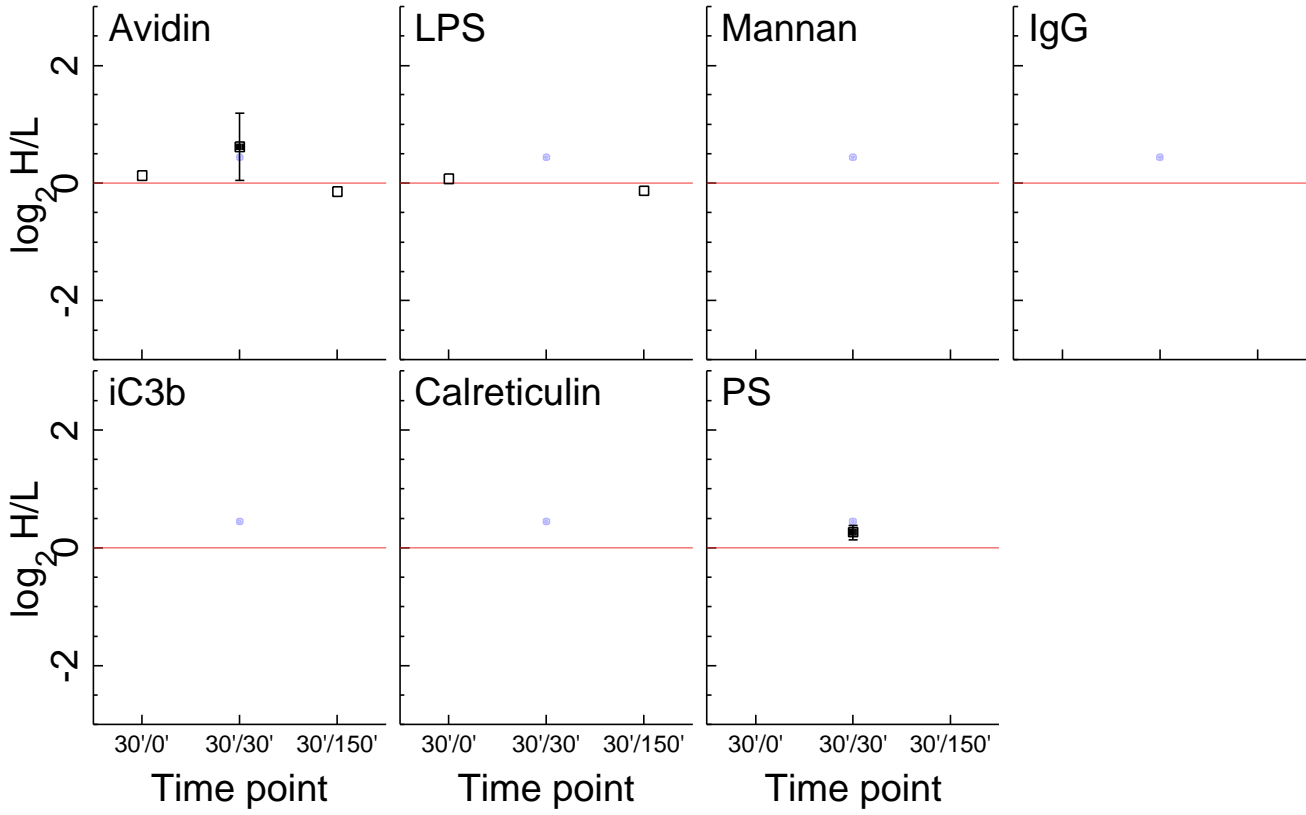

### rnf13 (O54965)

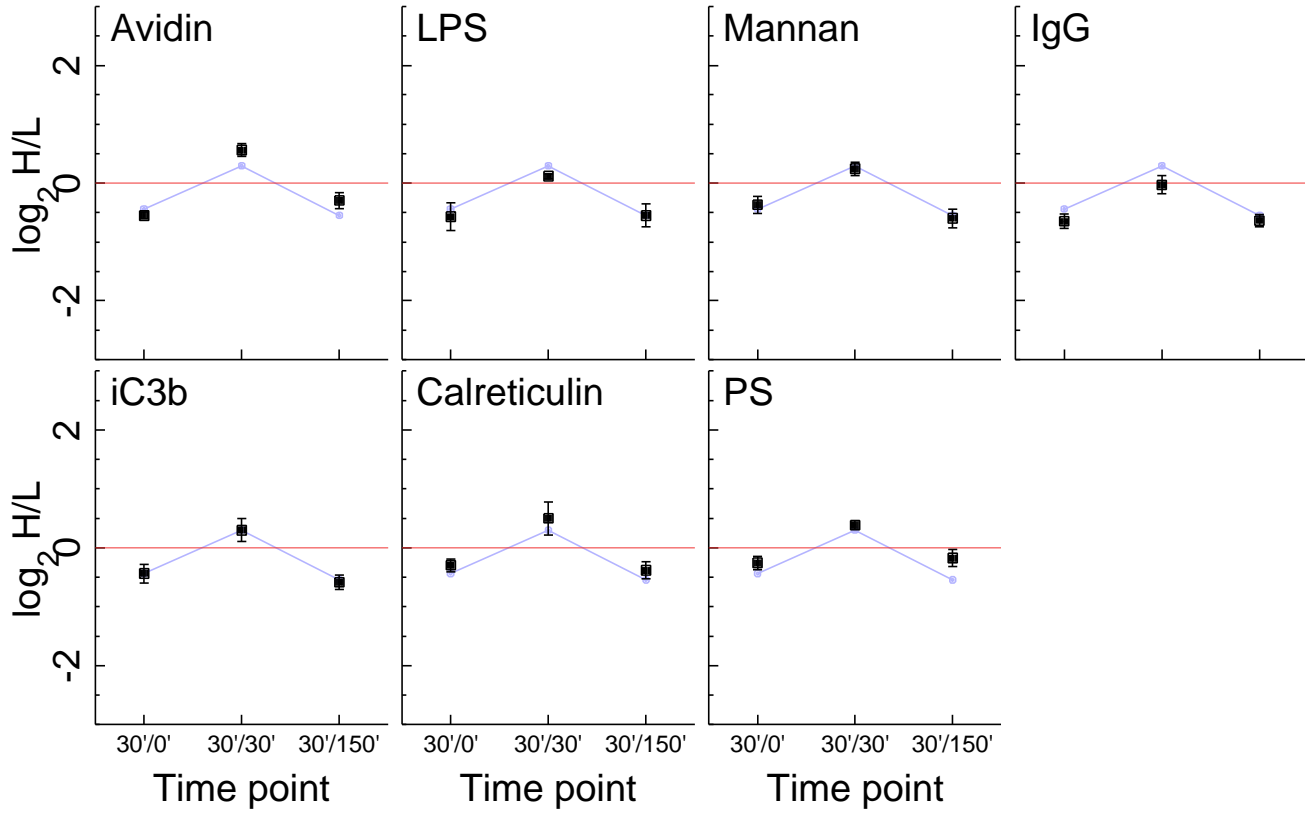

### rnf213 (F7A6H4)

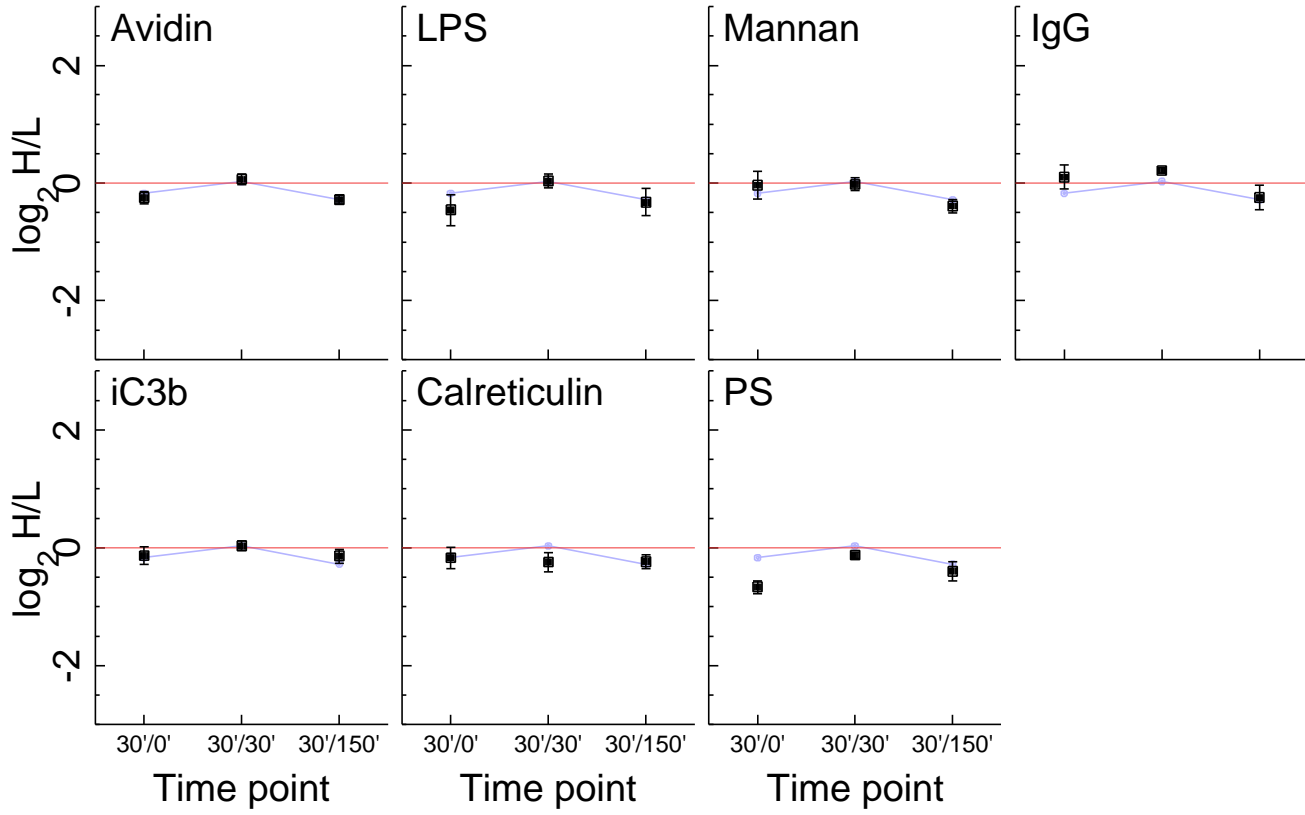

rnh1 (Q91VI7)

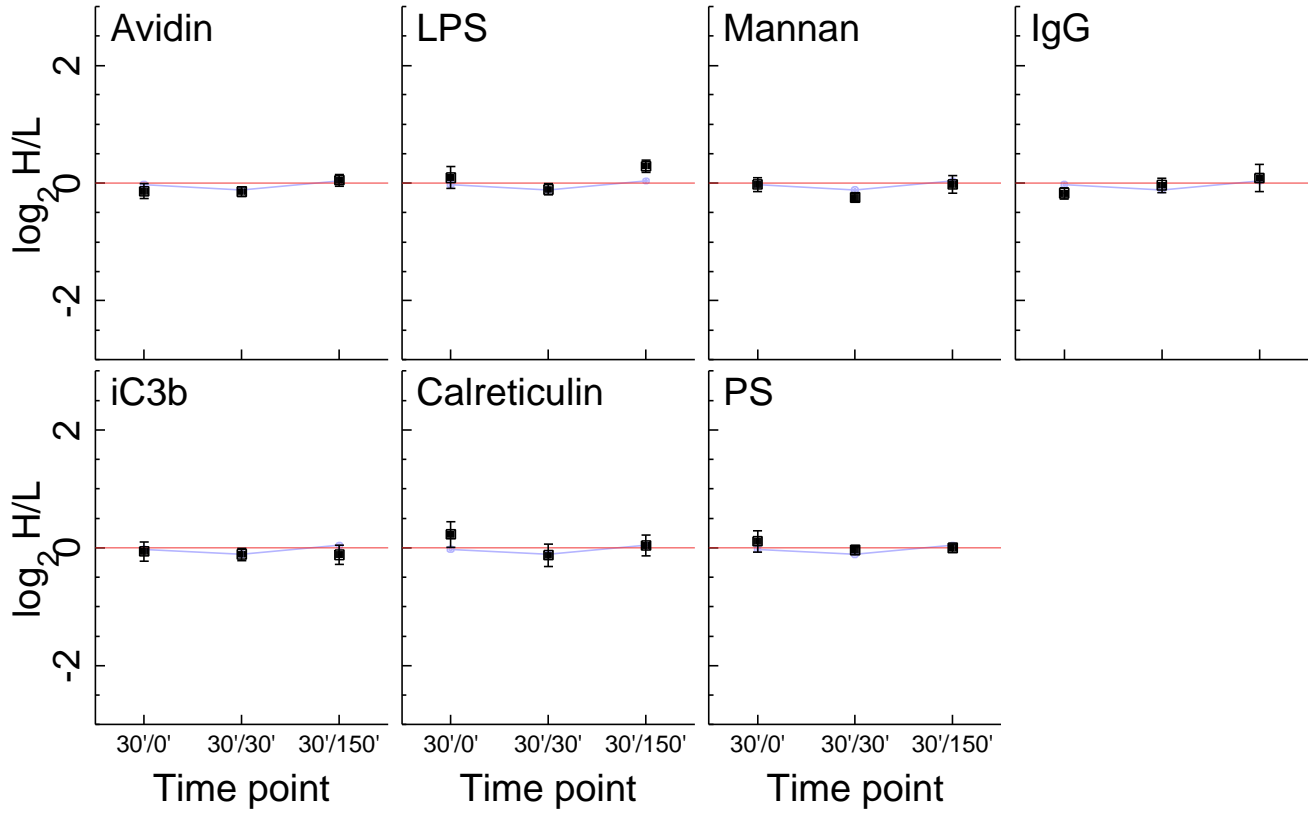

rock1 (P70335)

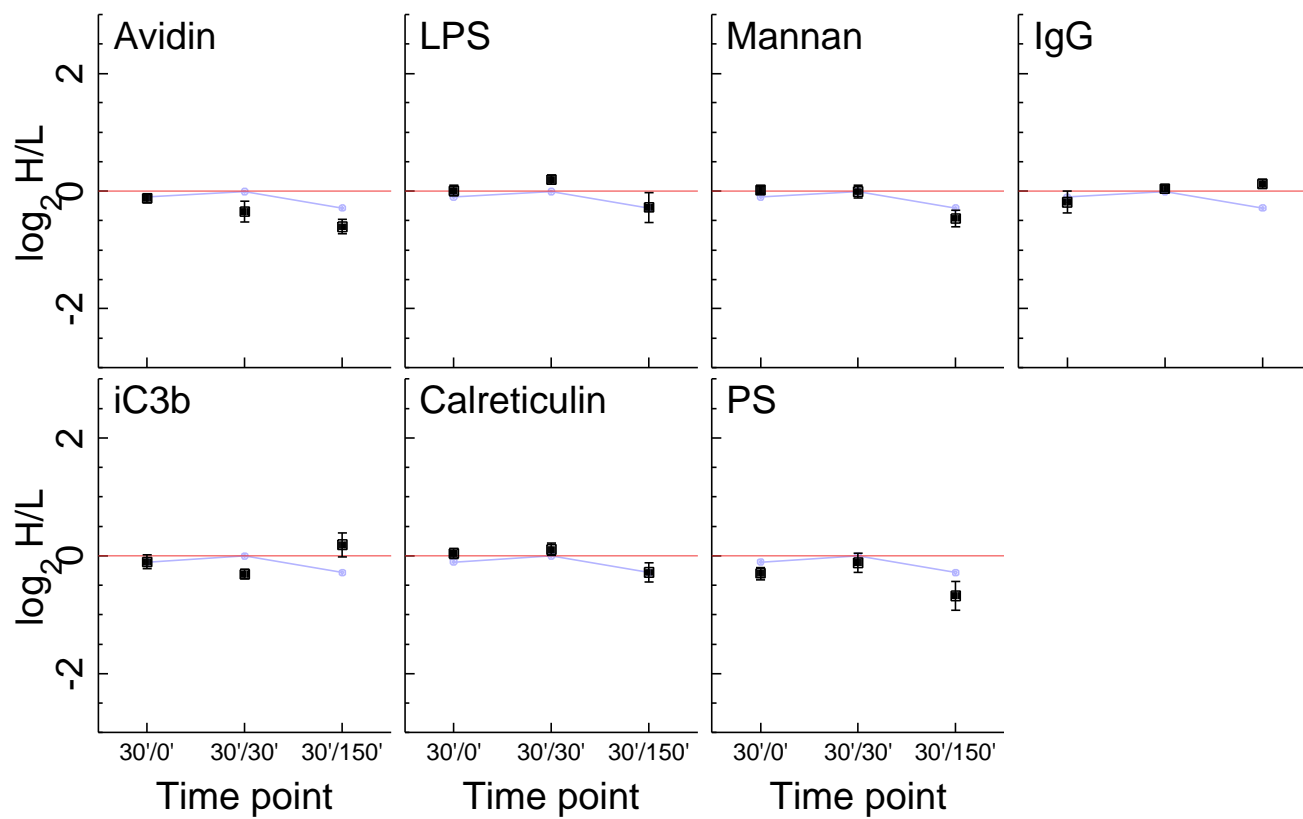

rock2 (P70336)

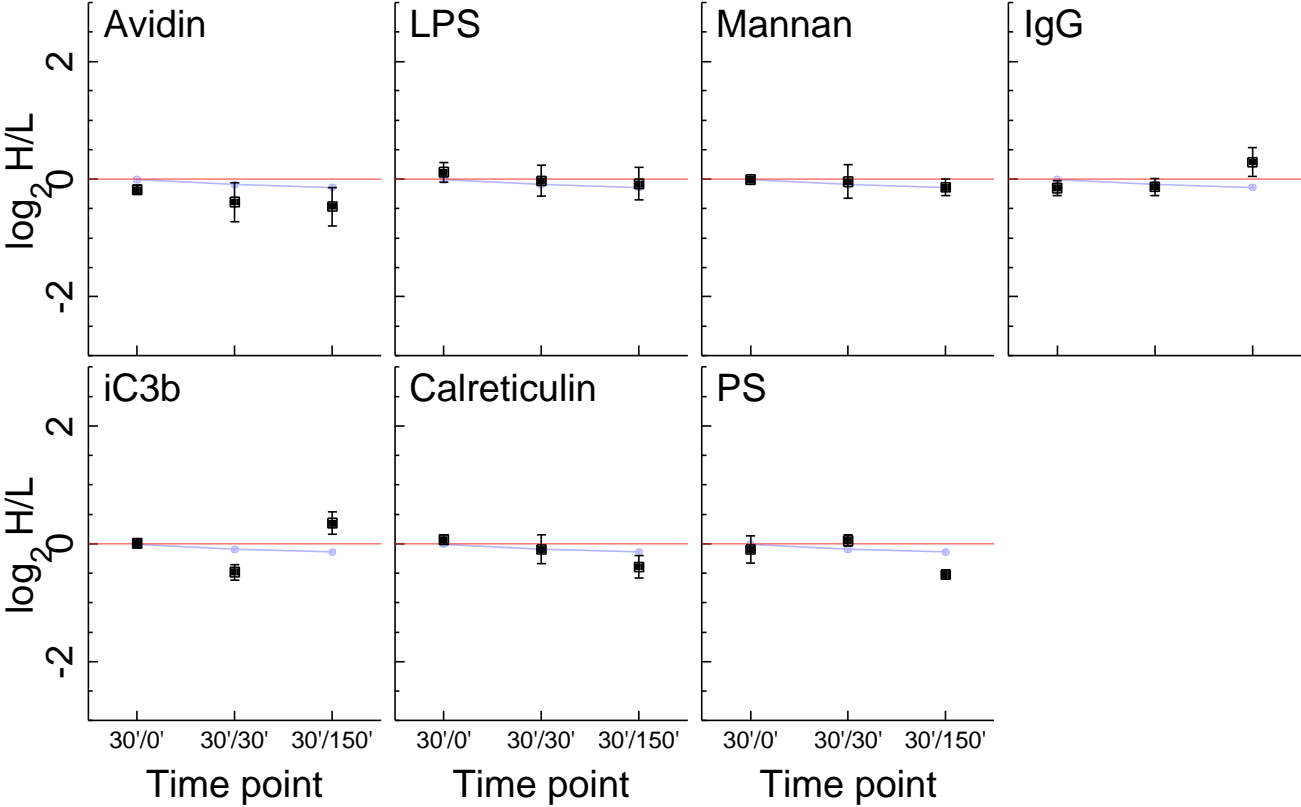

rod1 (G3UXA6)

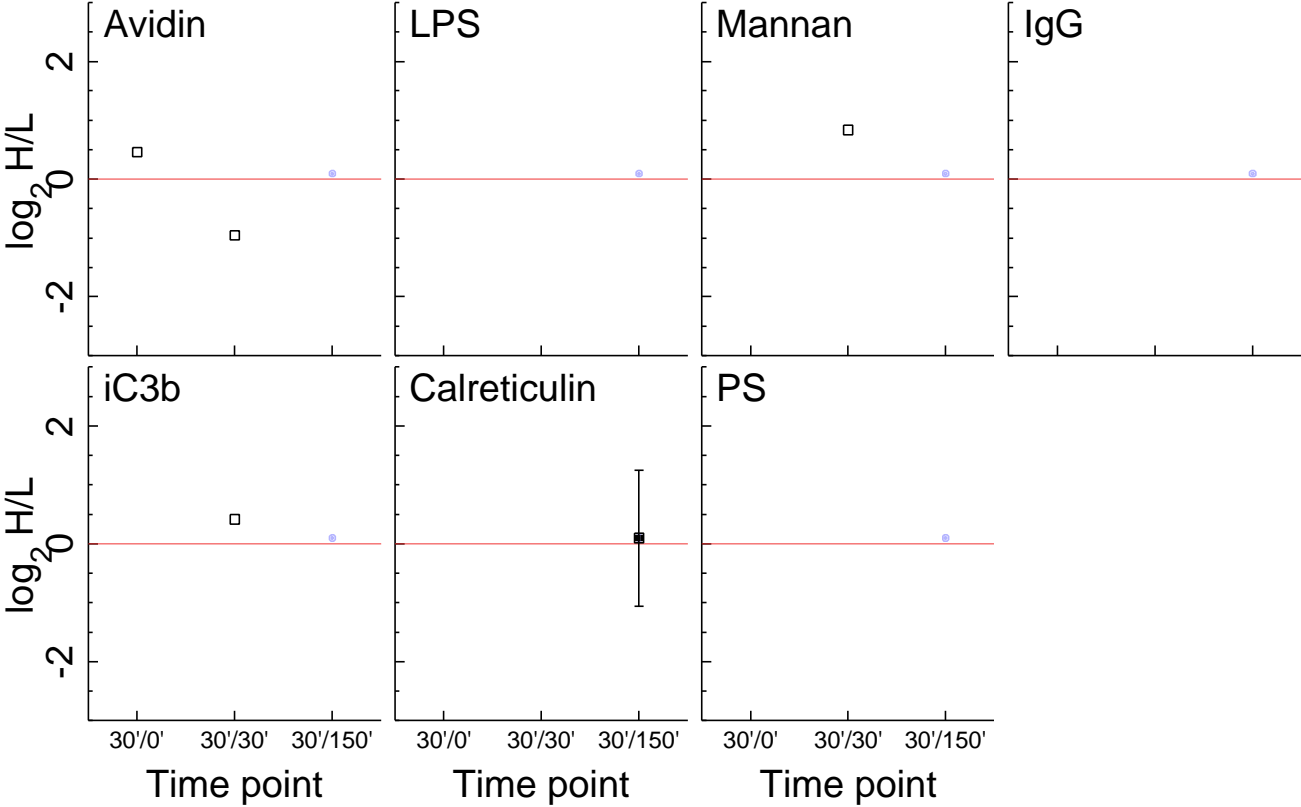

ros1 (Q78DX7)

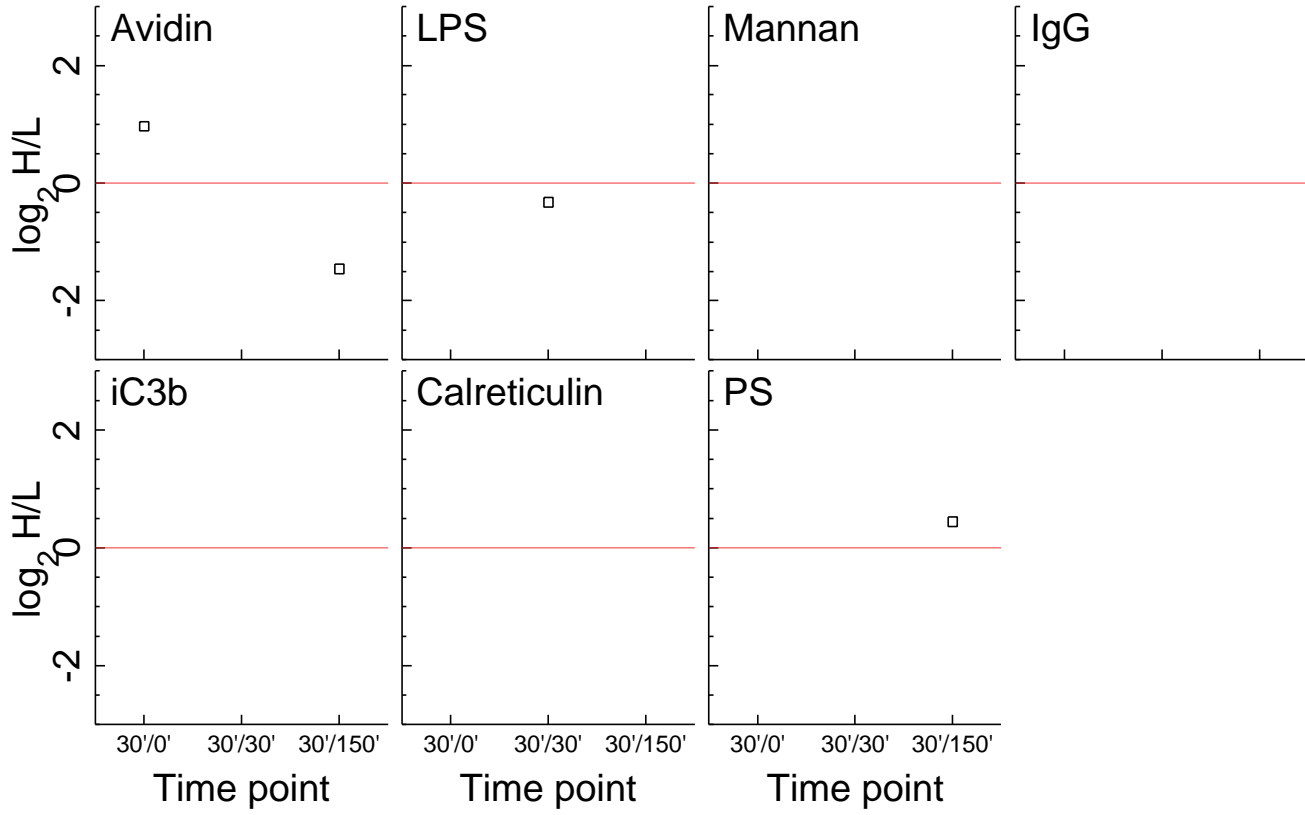



rp2 (Q9EPK2)

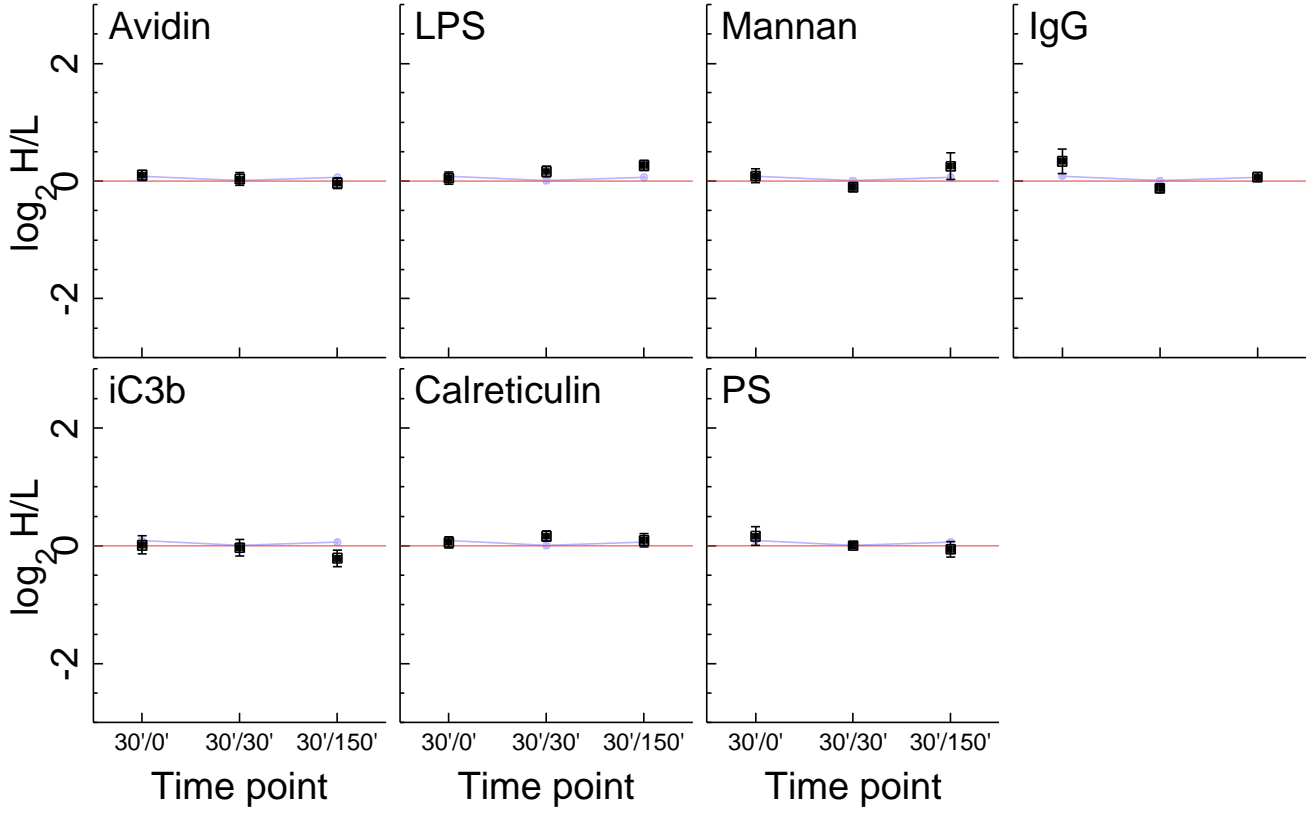

### rpl10a (Q5XJF6)

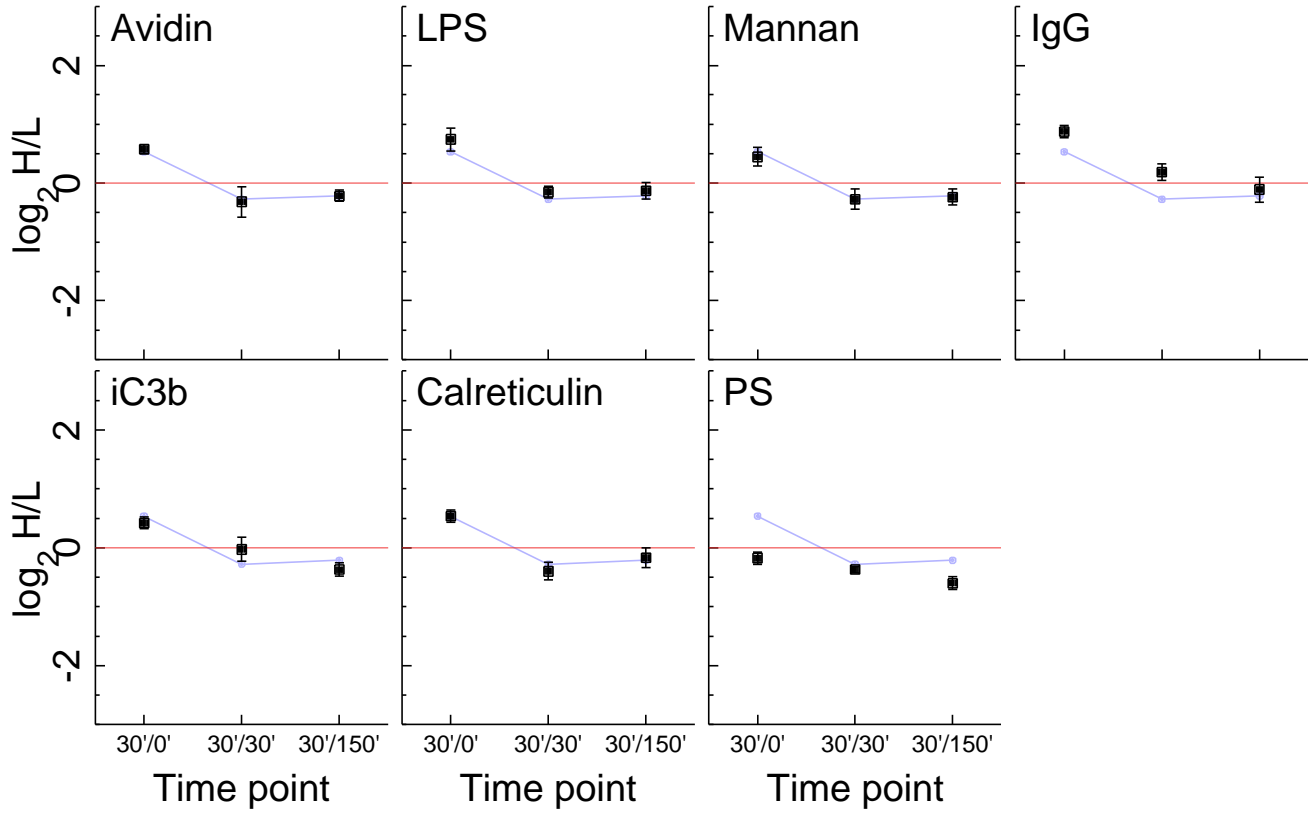

rpl10 (Q6ZWV3)

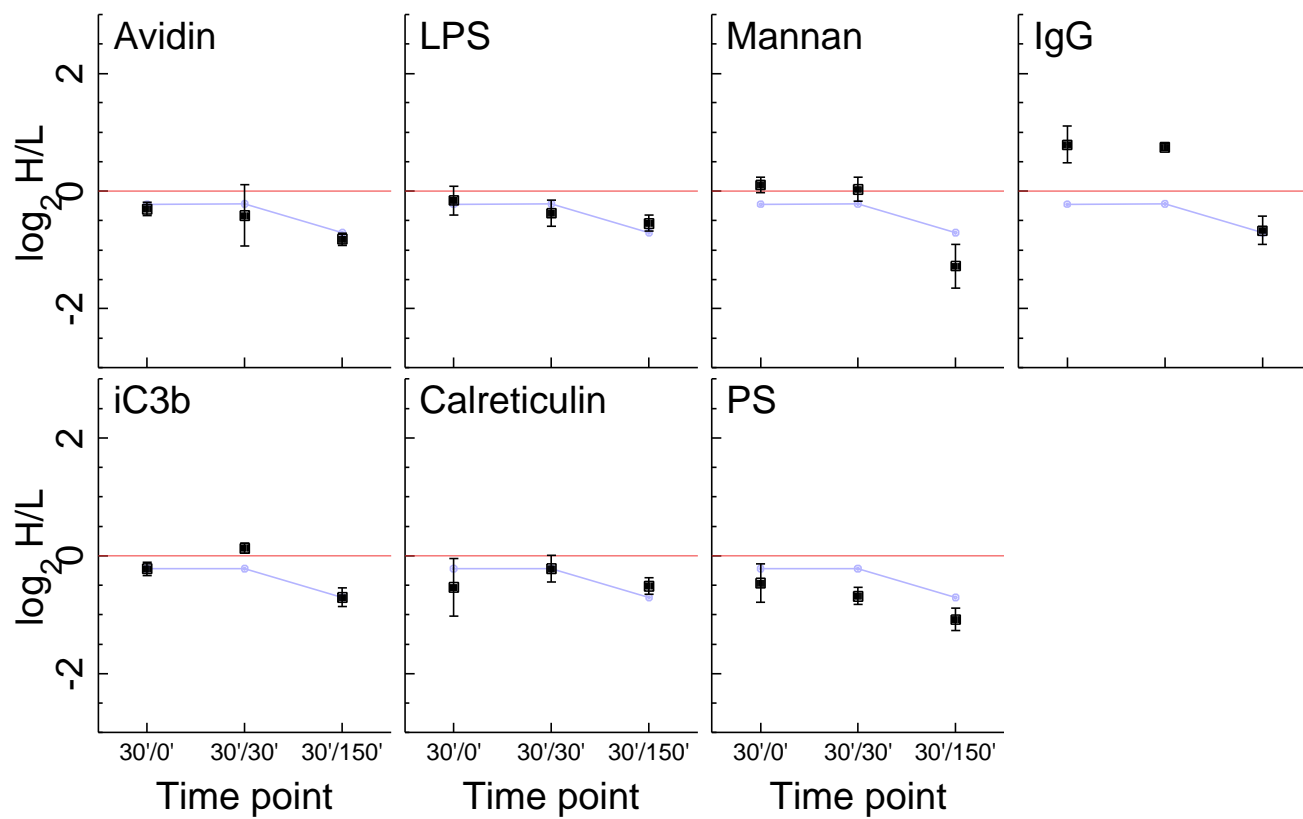

rpl12 (P35979)

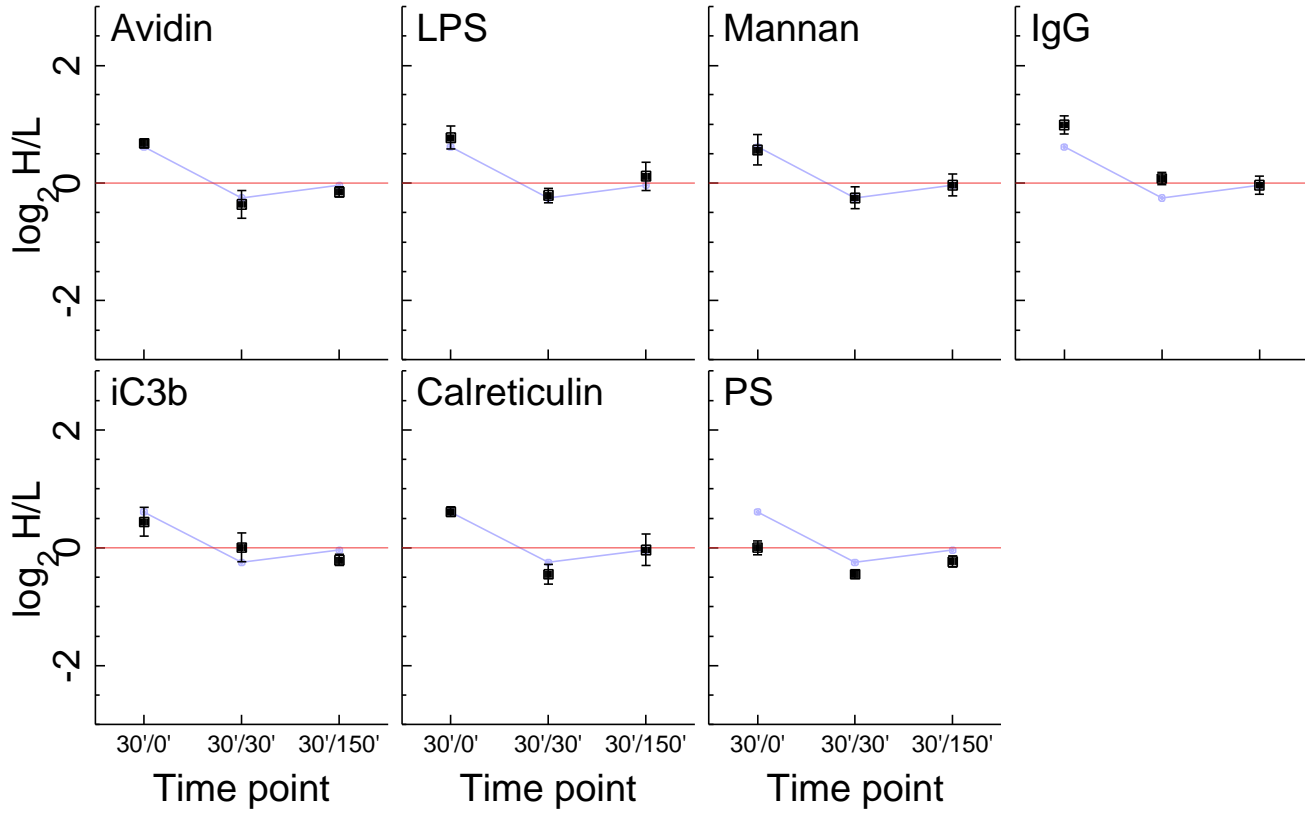

### rpl13 (P47963)

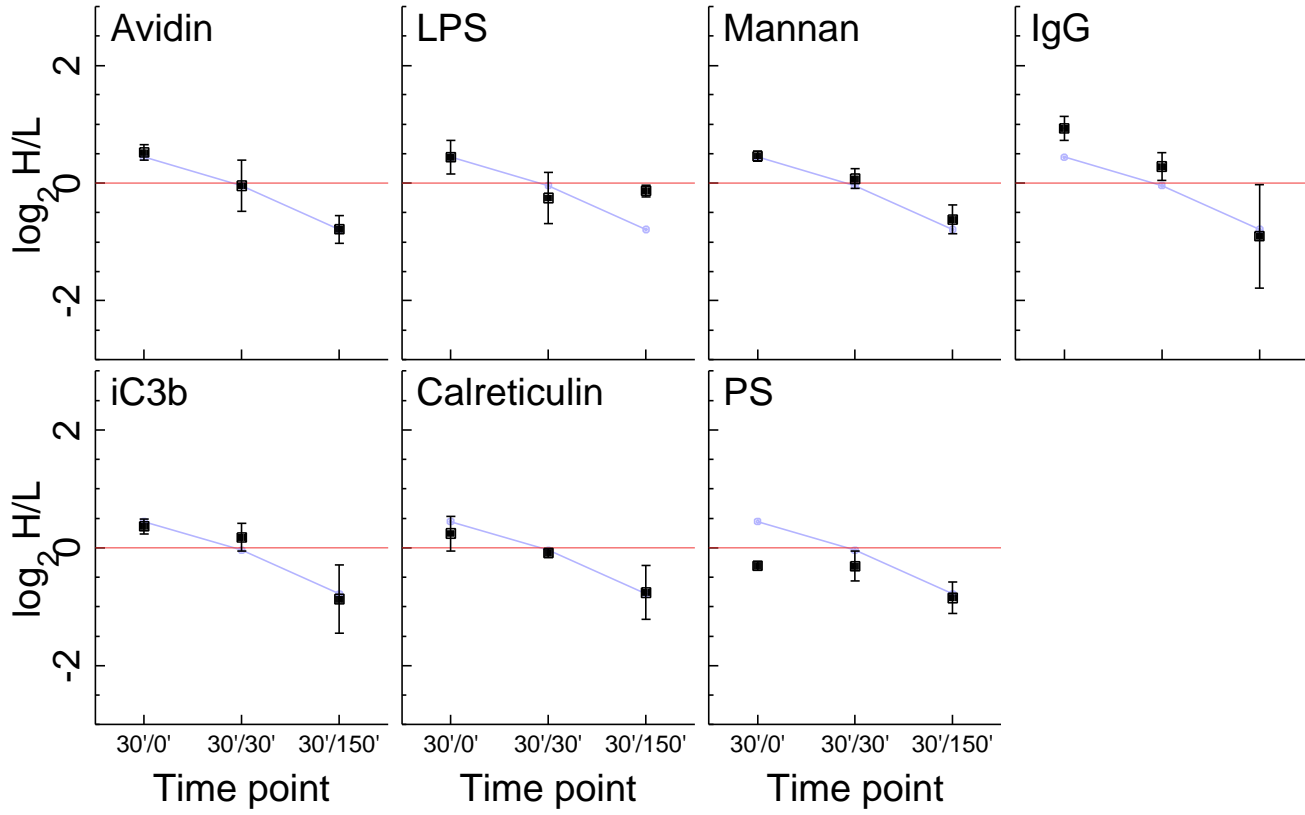

### rpl14 (Q9CR57)

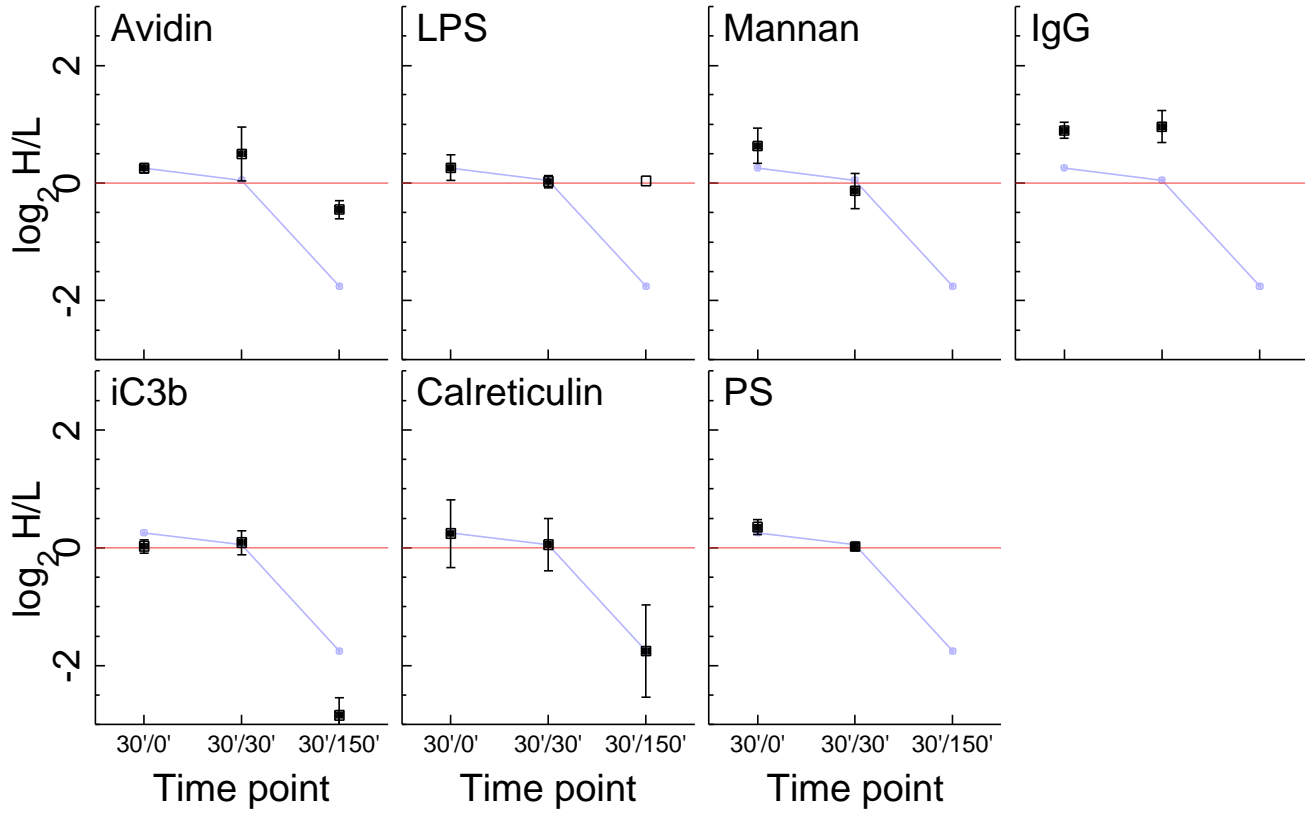

rpl17 (Q6ZWZ7)

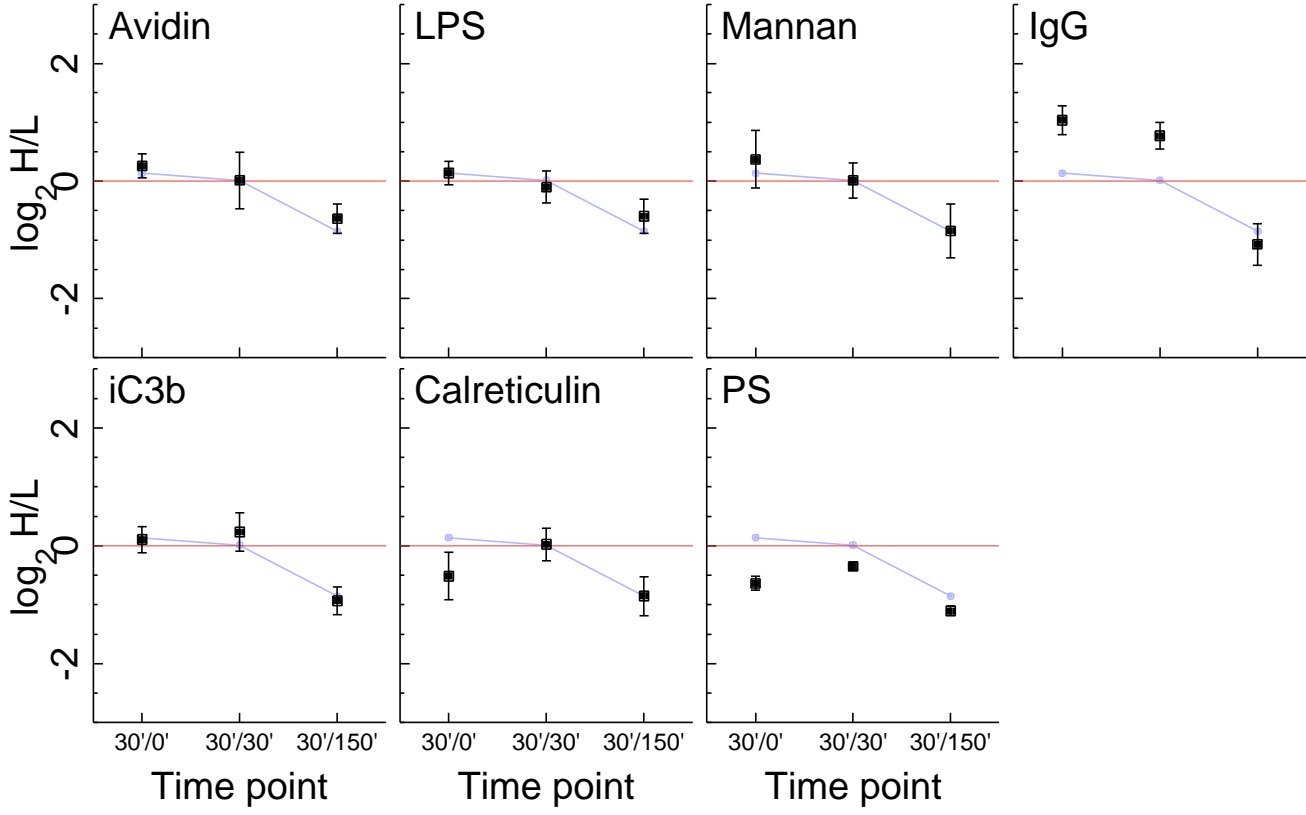

rpl21 (O09167)

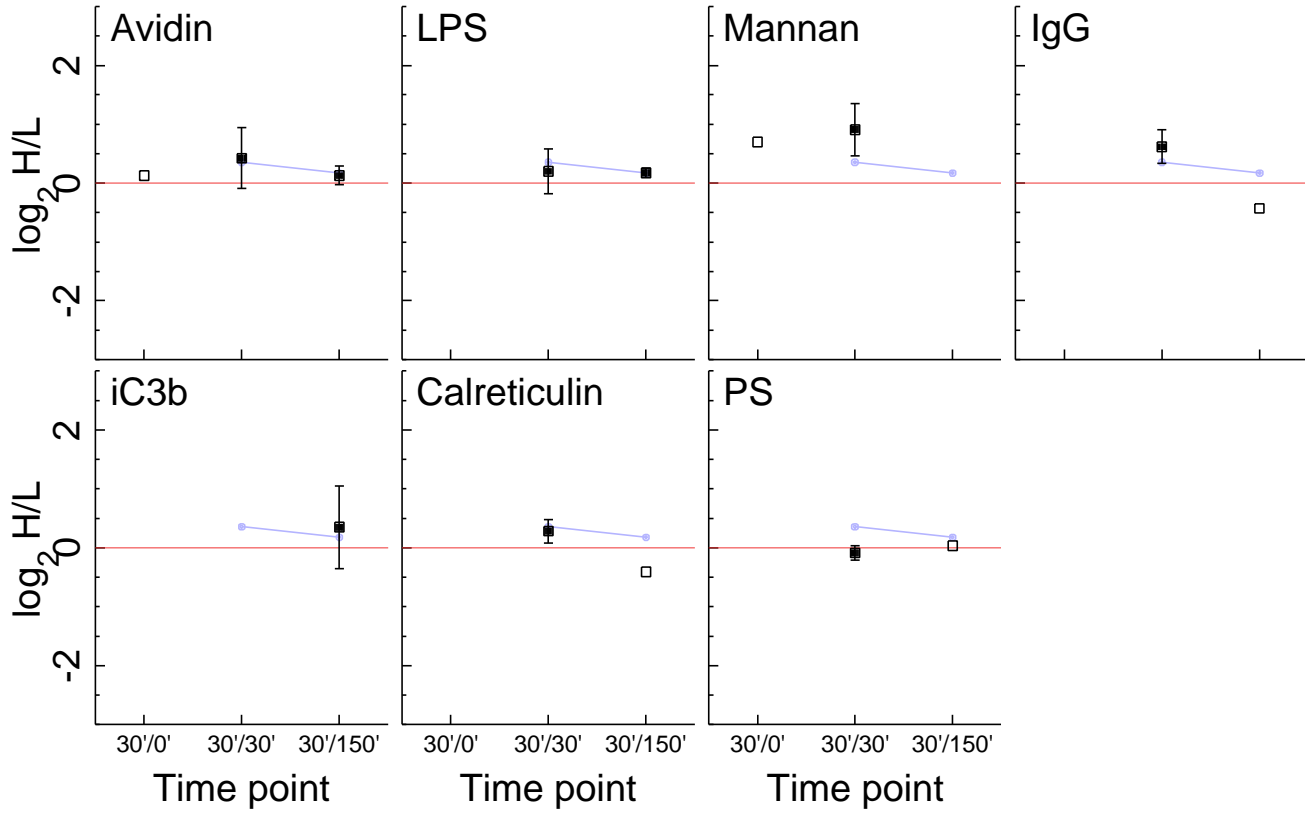



rpl22l1 (Q9D7S7)

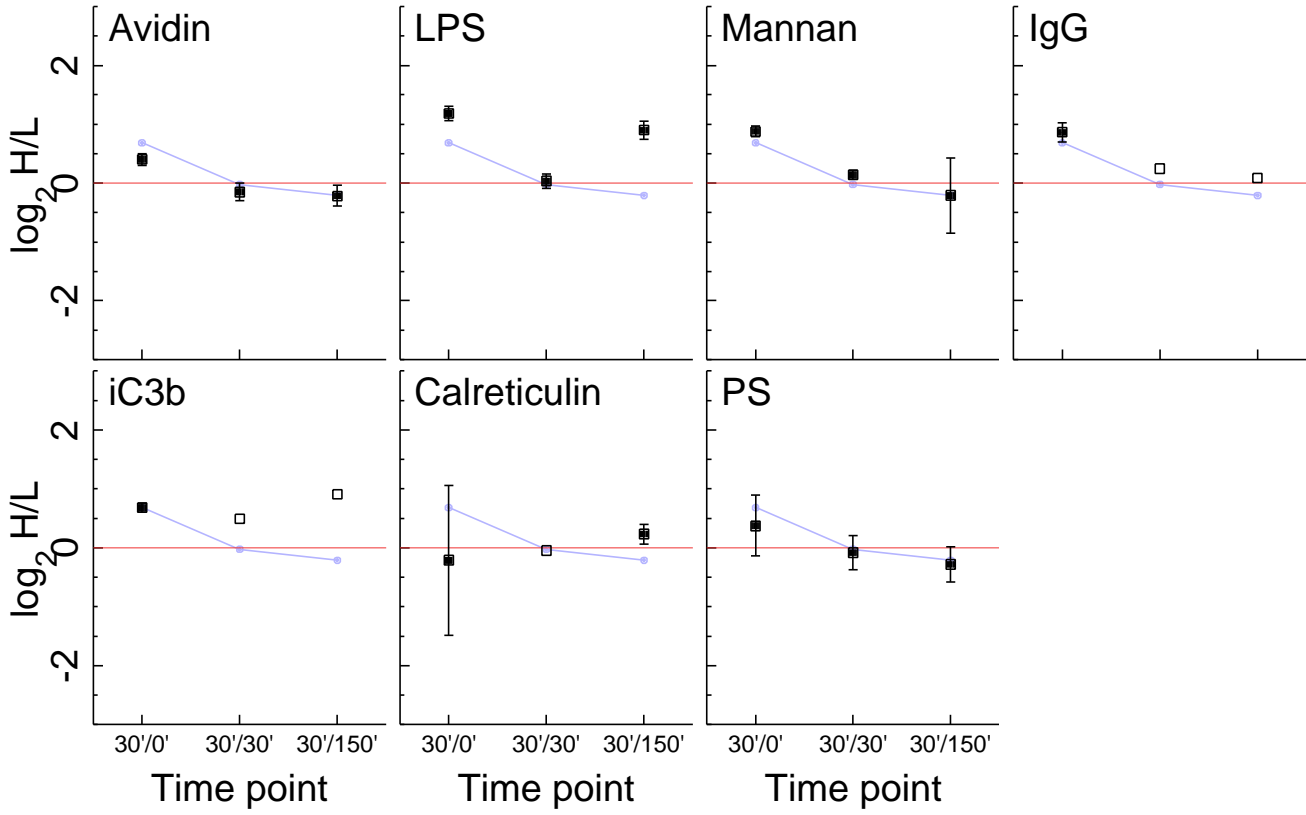

rpl22 (P67984)

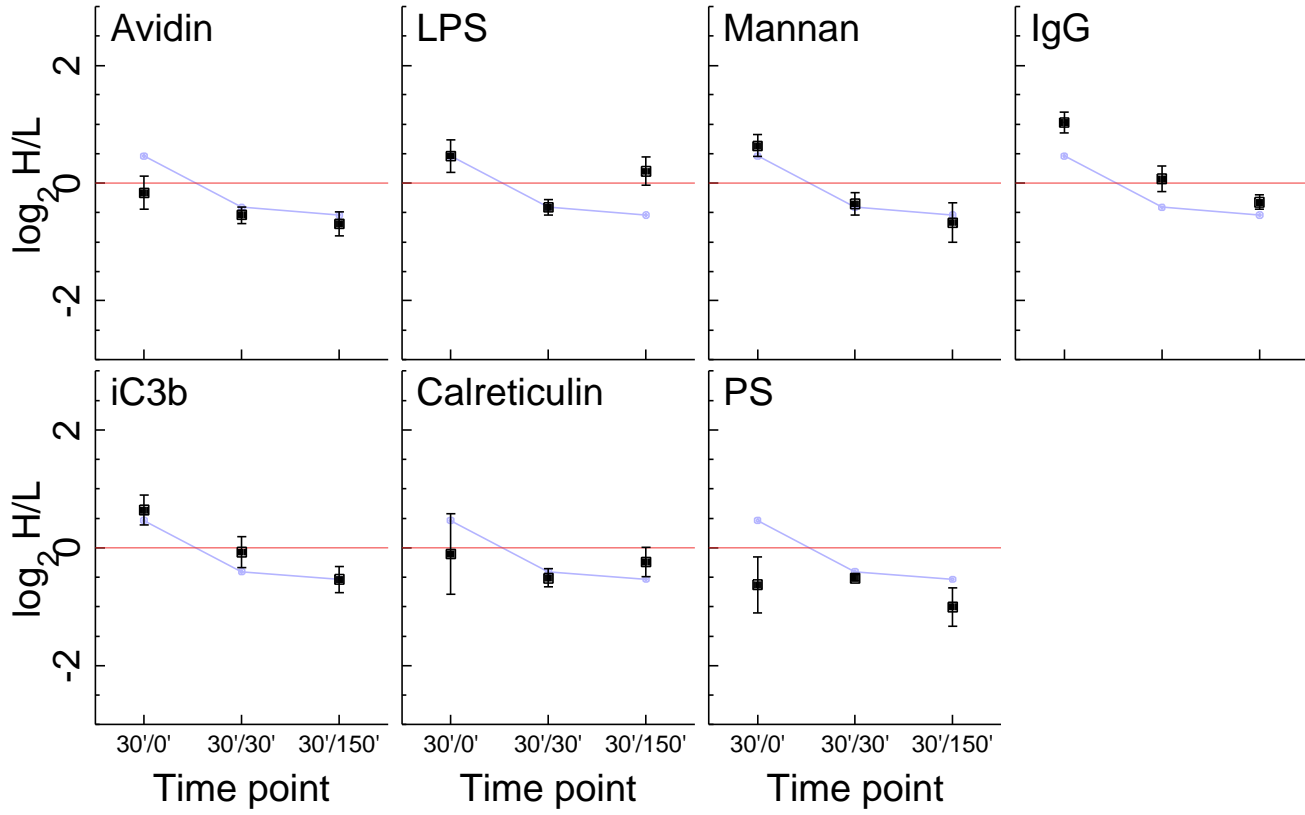

### rp123a-ps3 (D3YWP3)

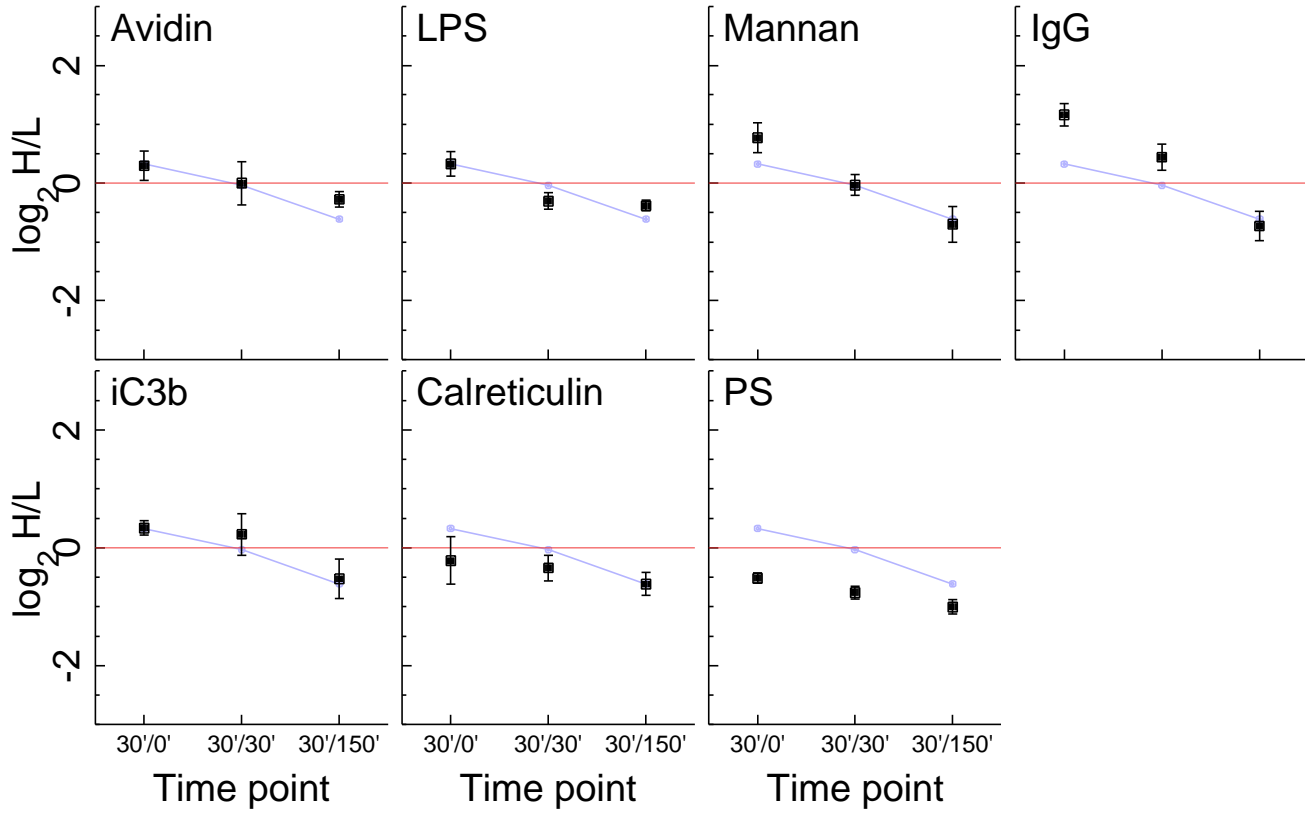

### rpl23 (P62830)

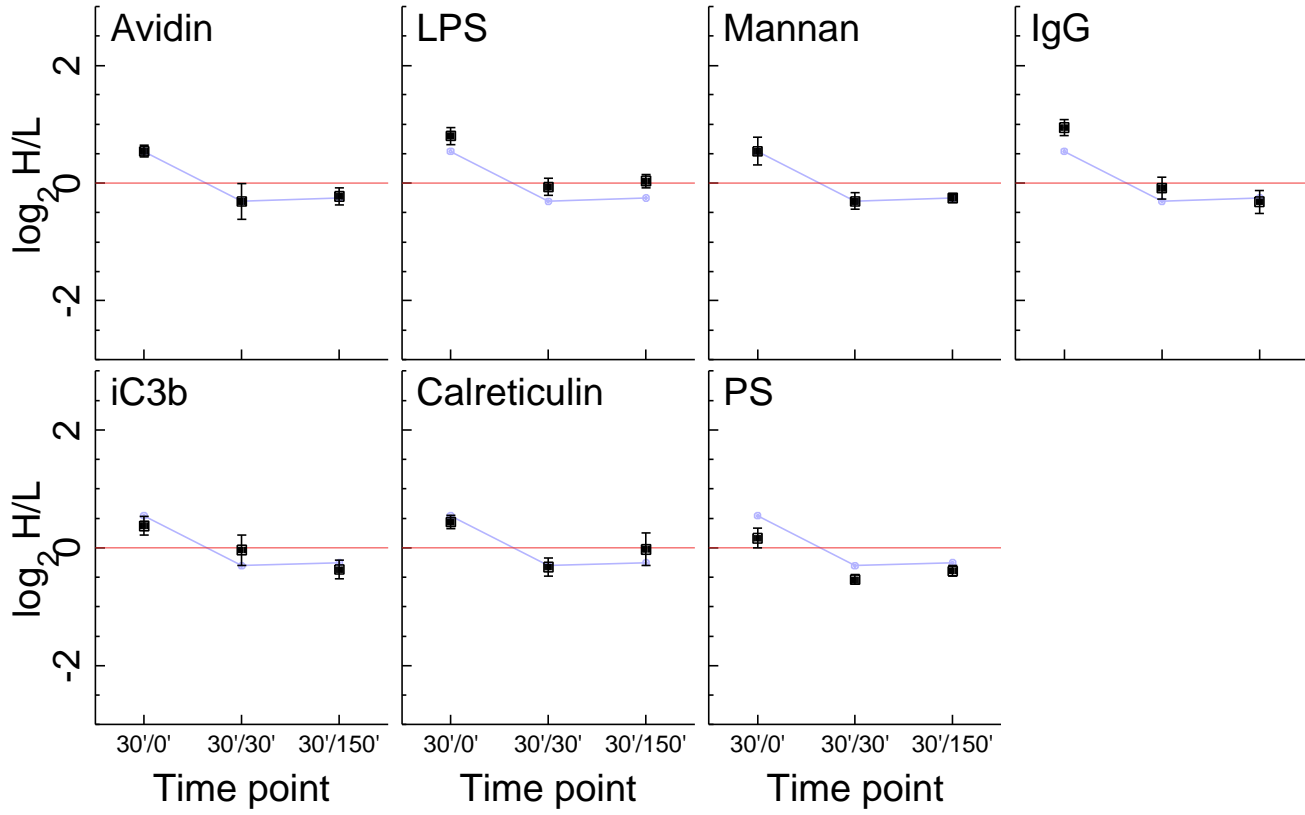

rpl24 (Q8BP67)

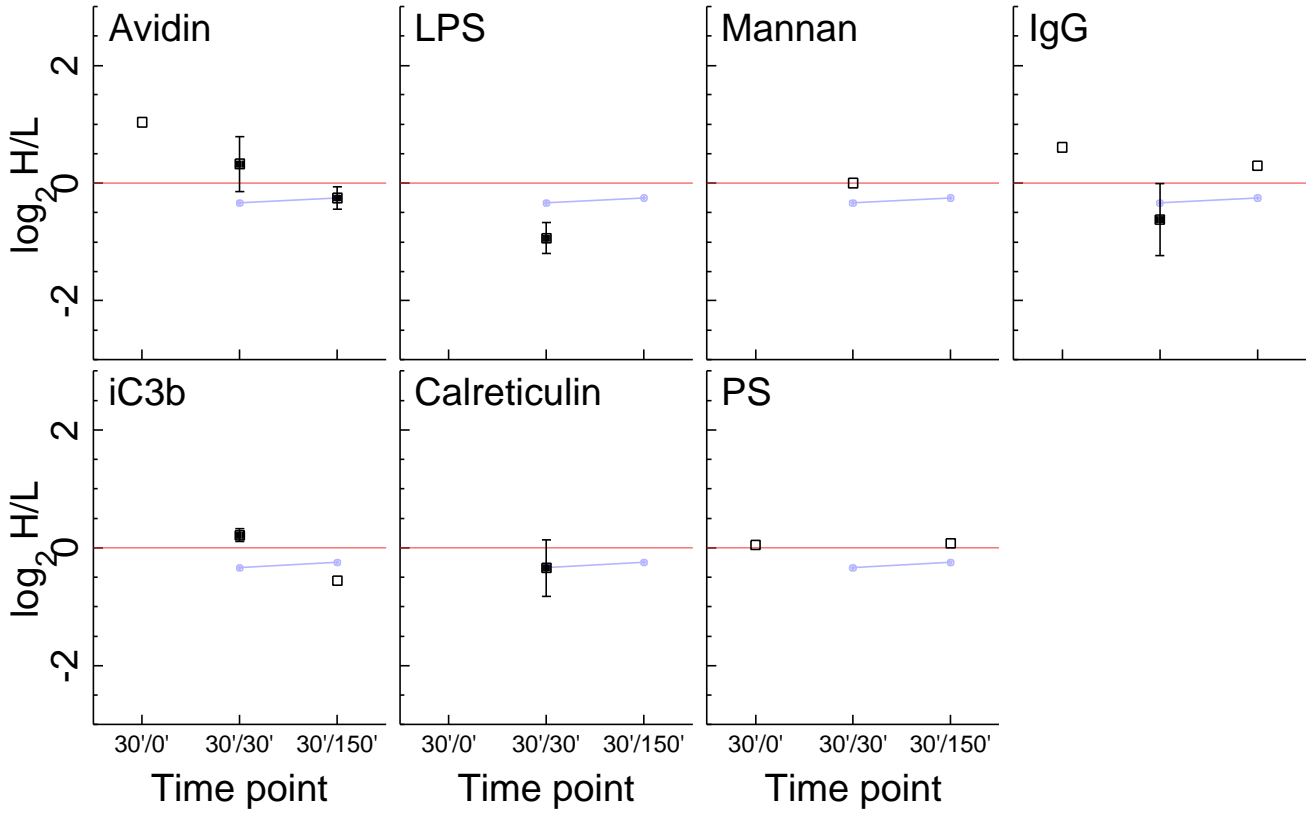

rpl26 (P61255)

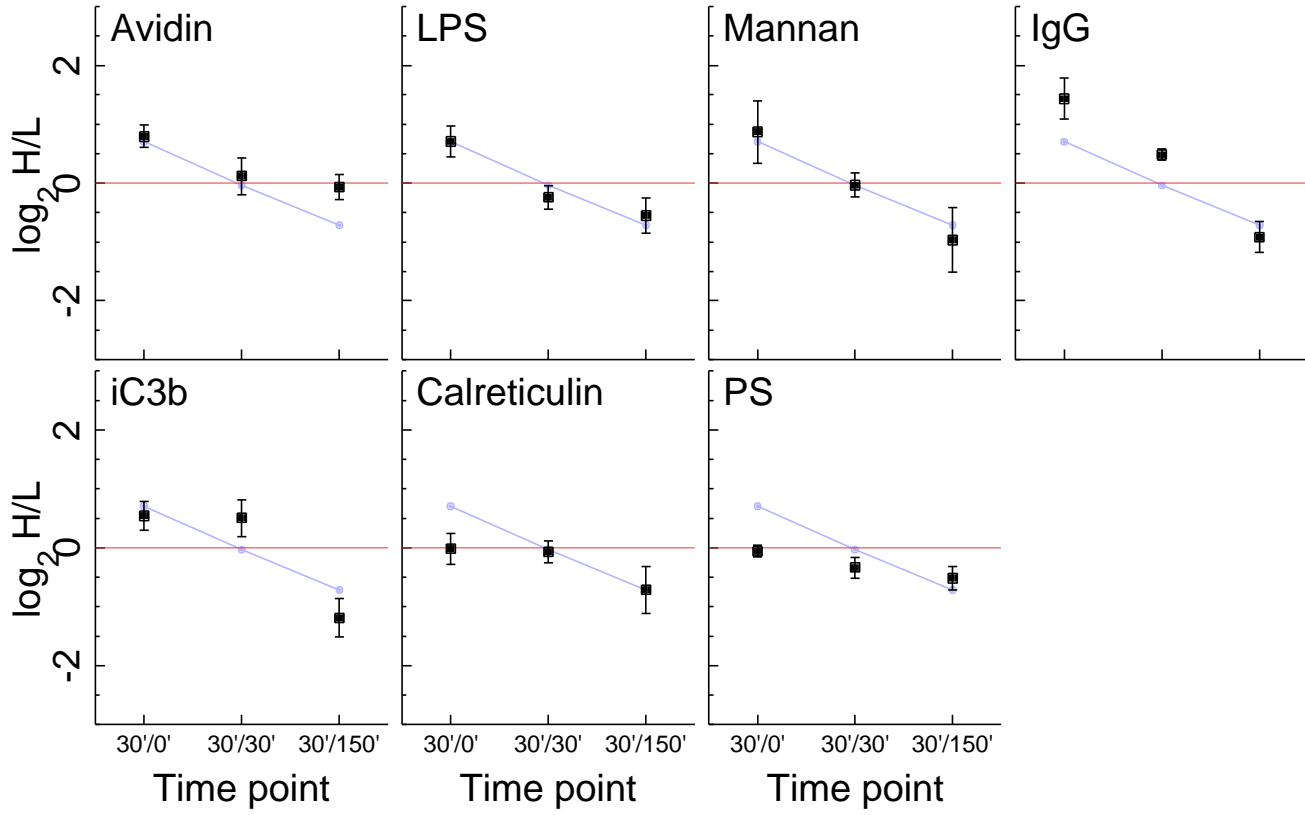

rpl27 (P61358)

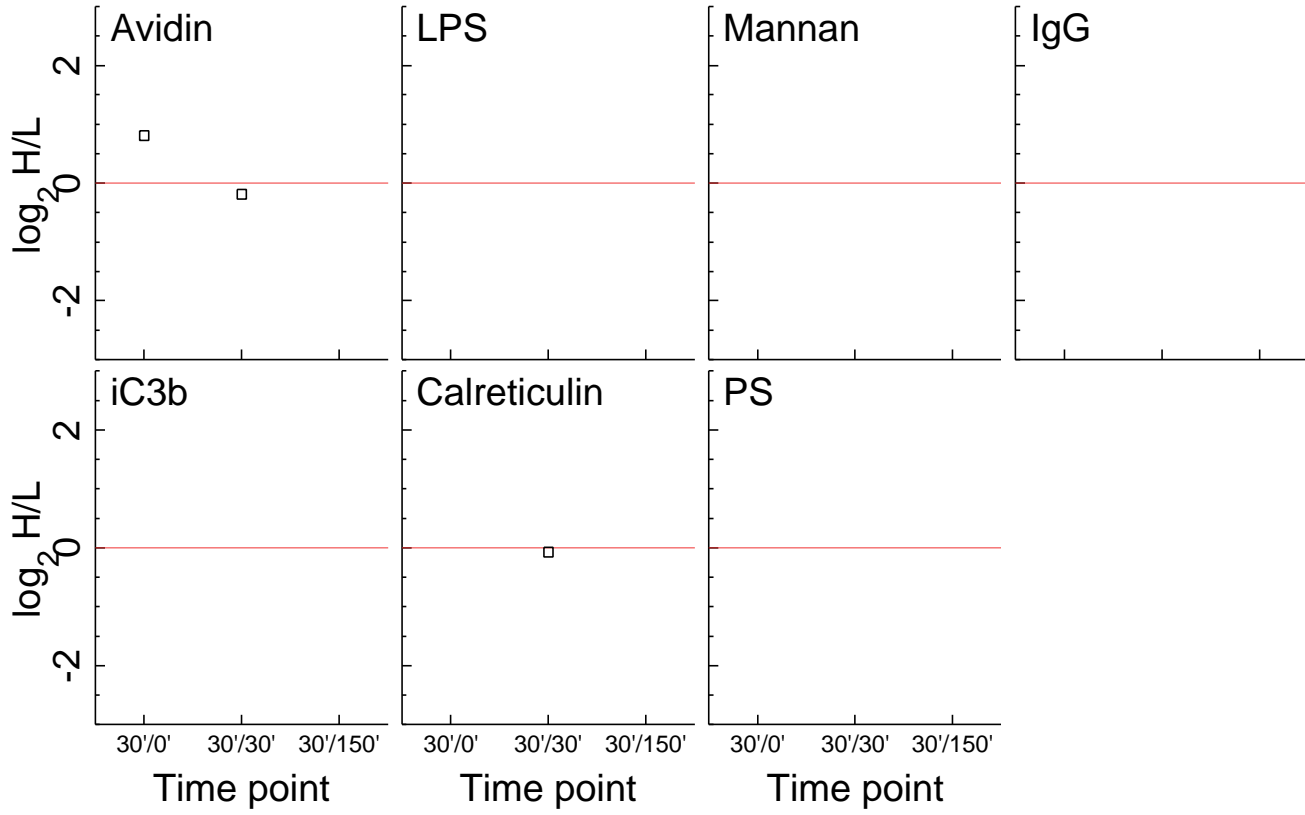

rpl28 (P41105)

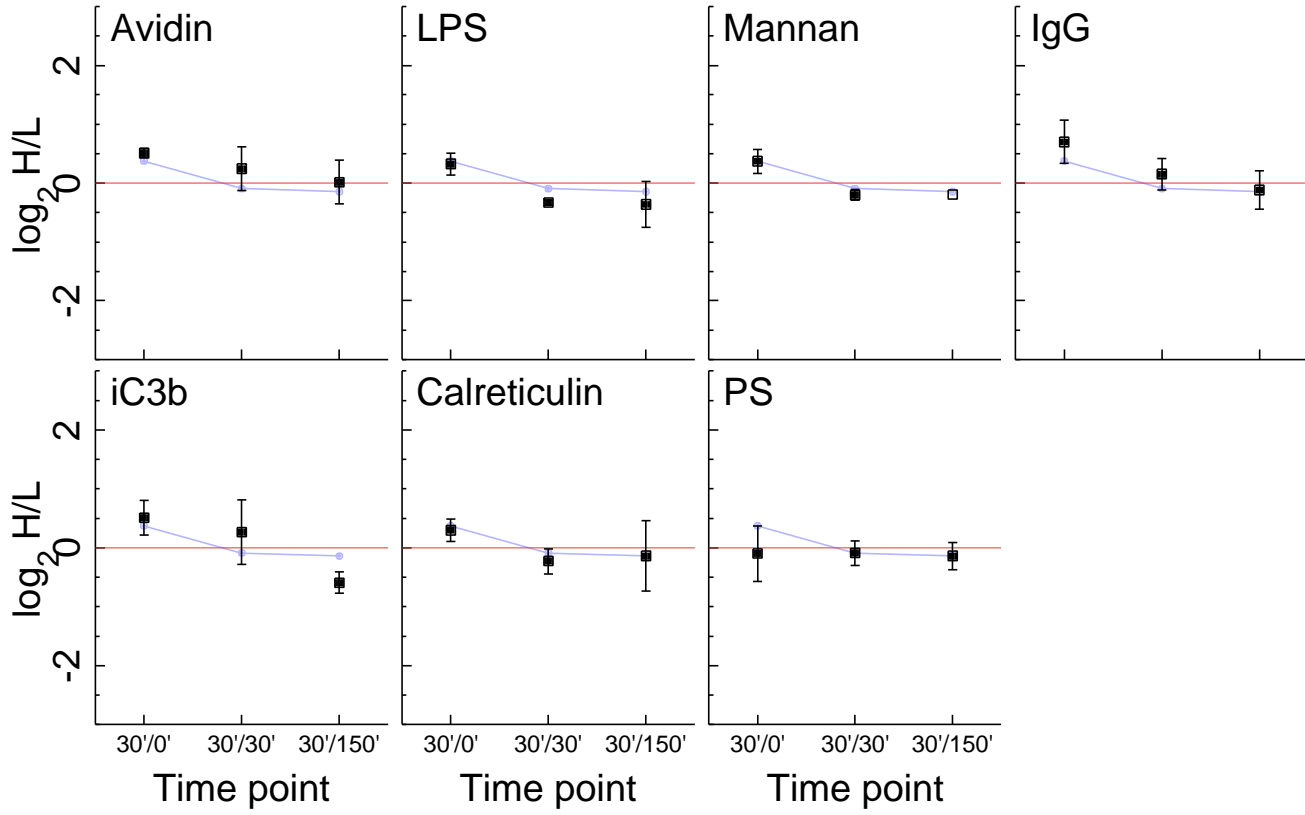



rpl30 (P62889)

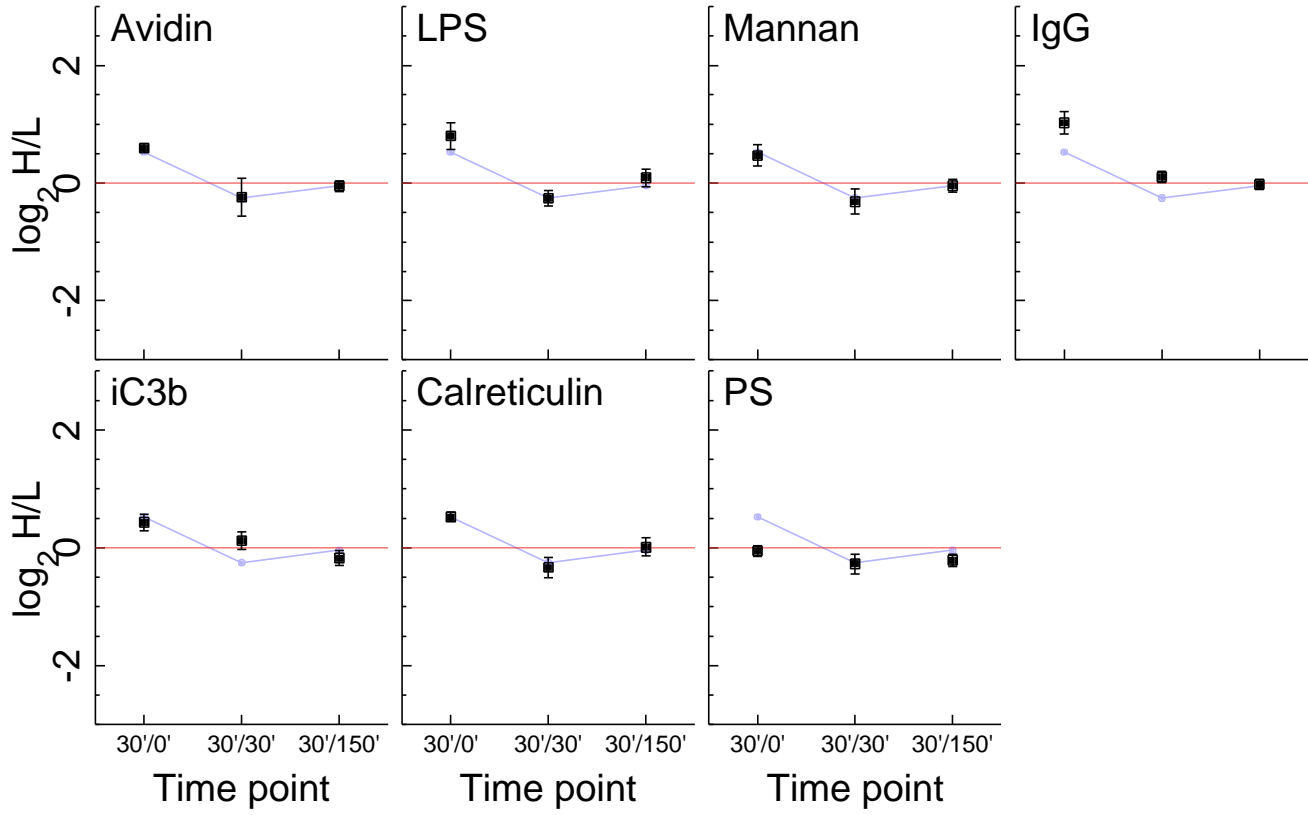

rpl31 (P62900)

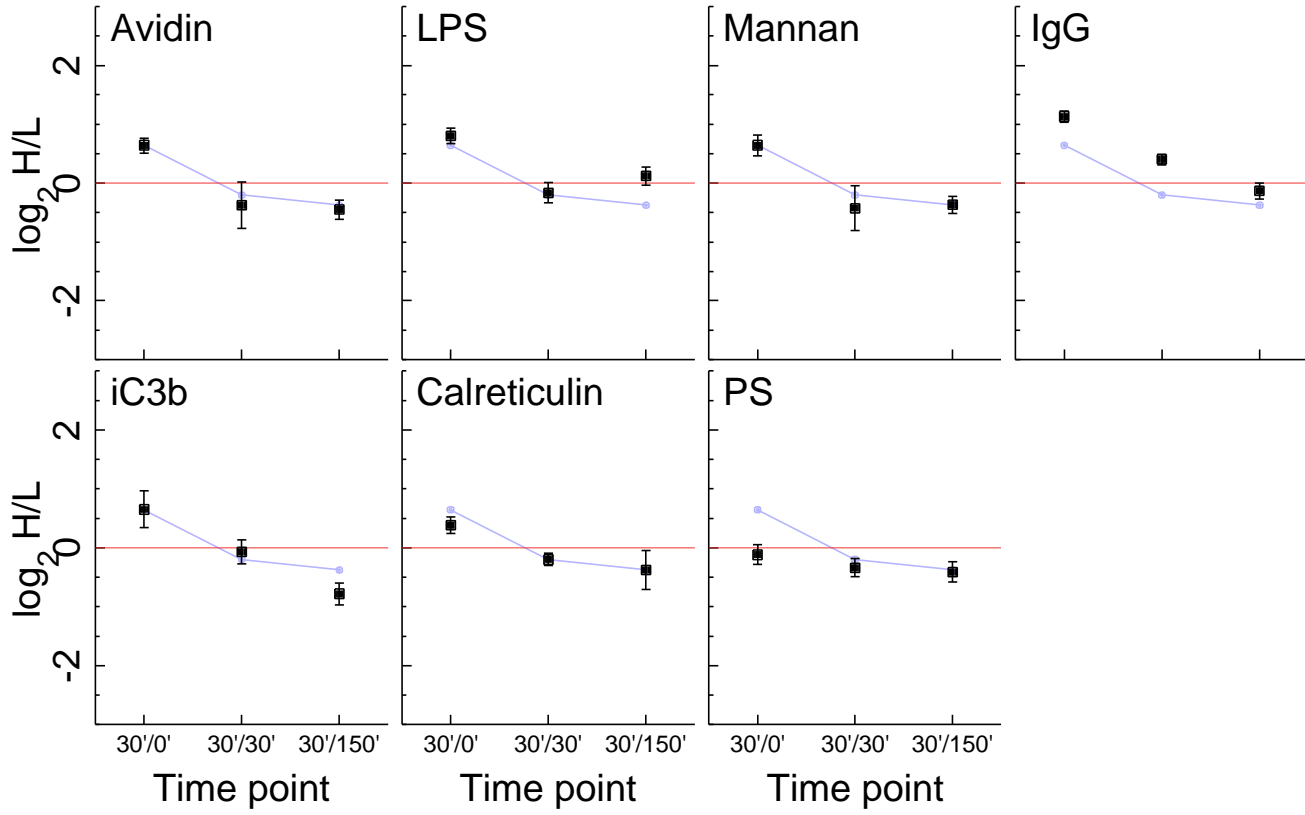

rp134 (Q9D1R9)

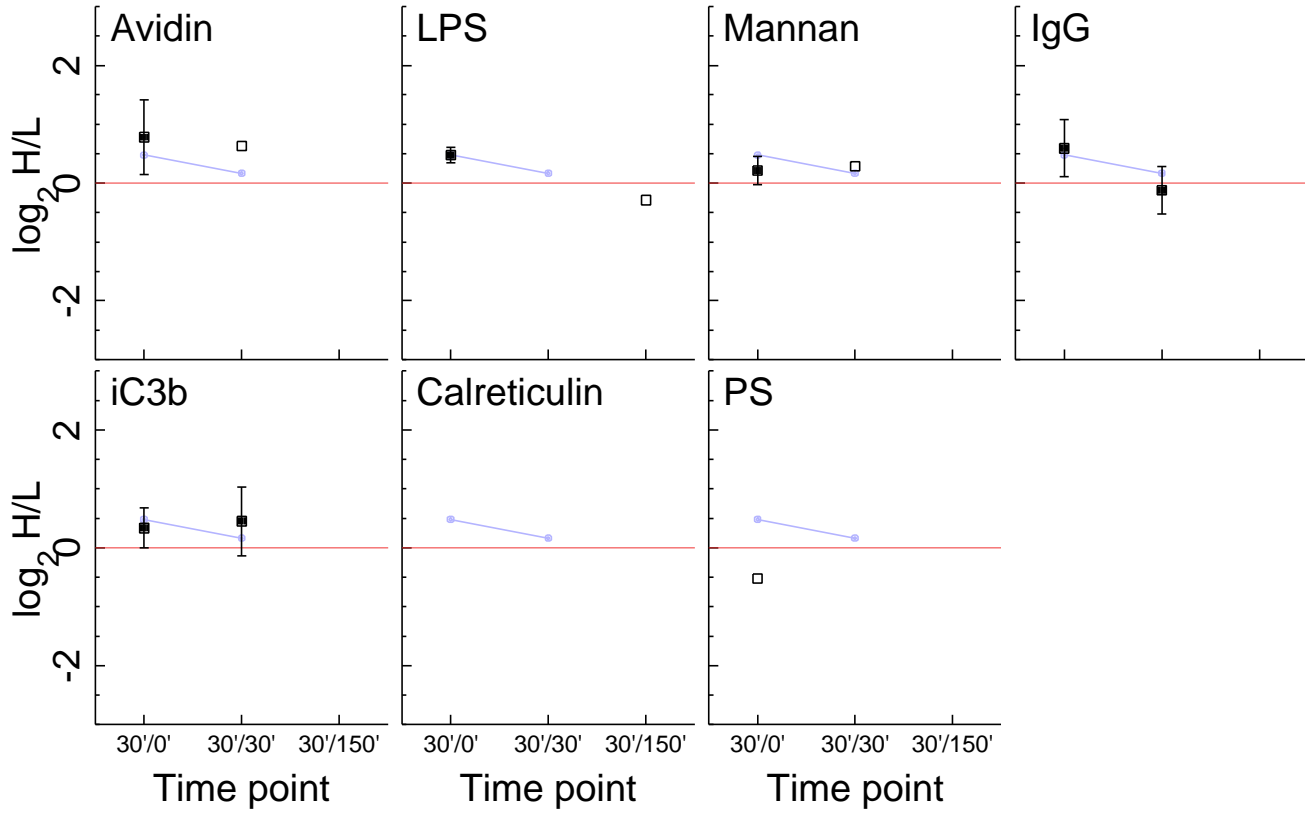

rpl35a (O55142)

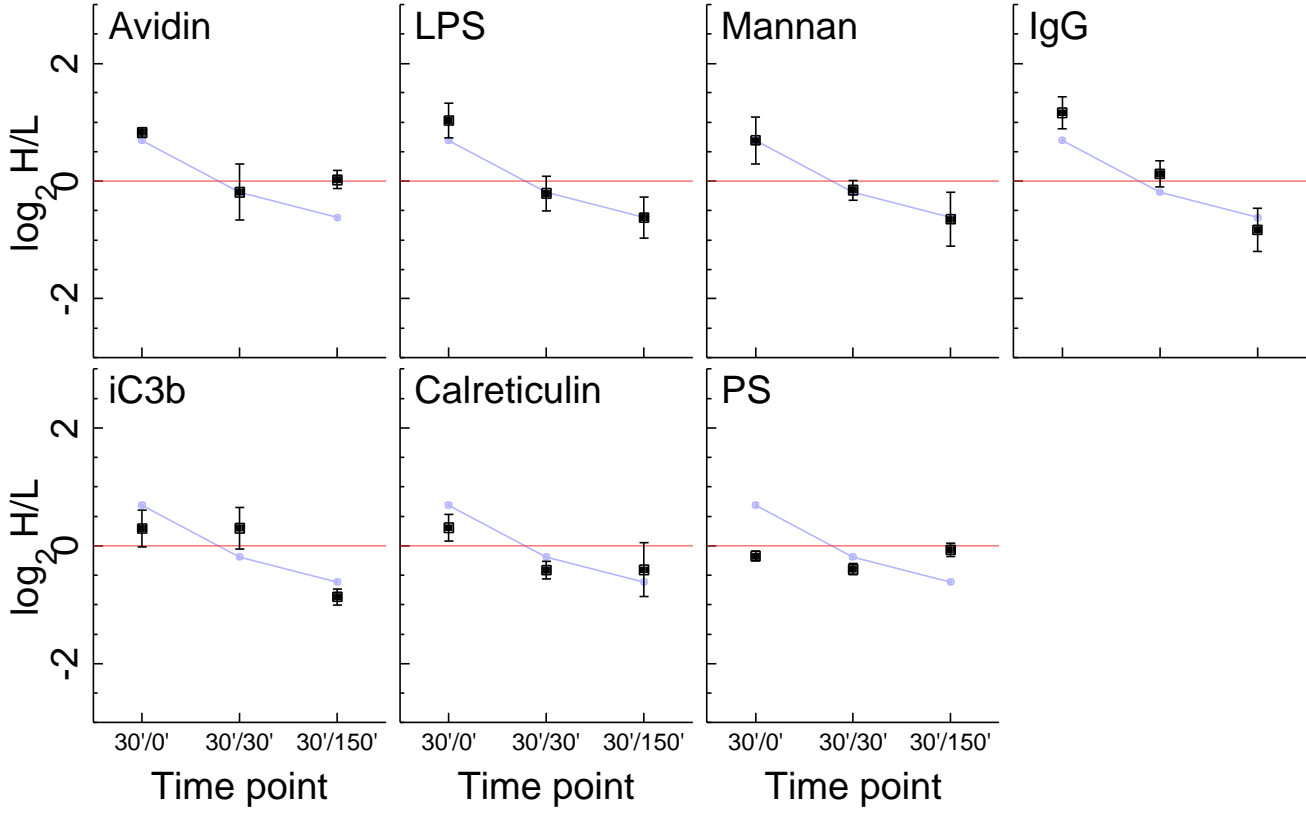

rpl37a (P61514)

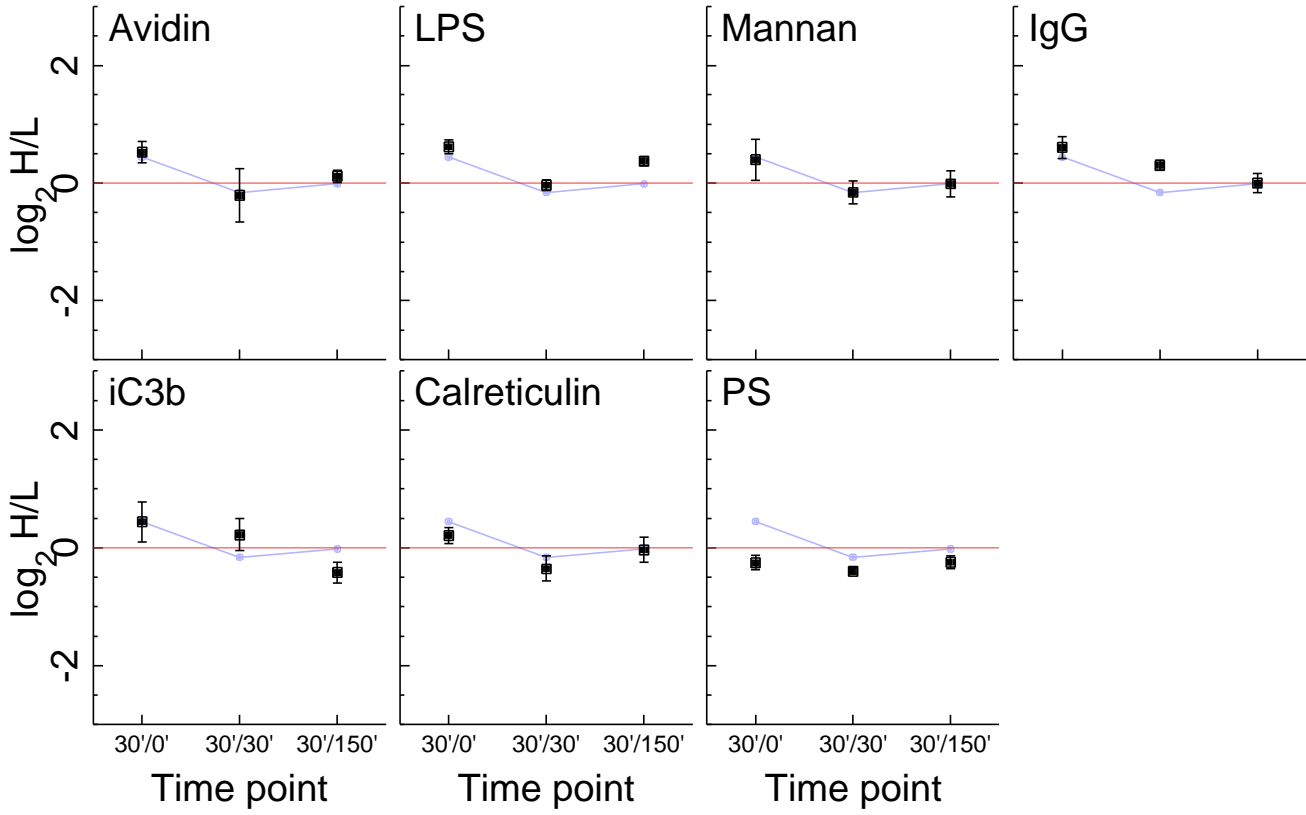

### rpl38 (Q9JJI8)

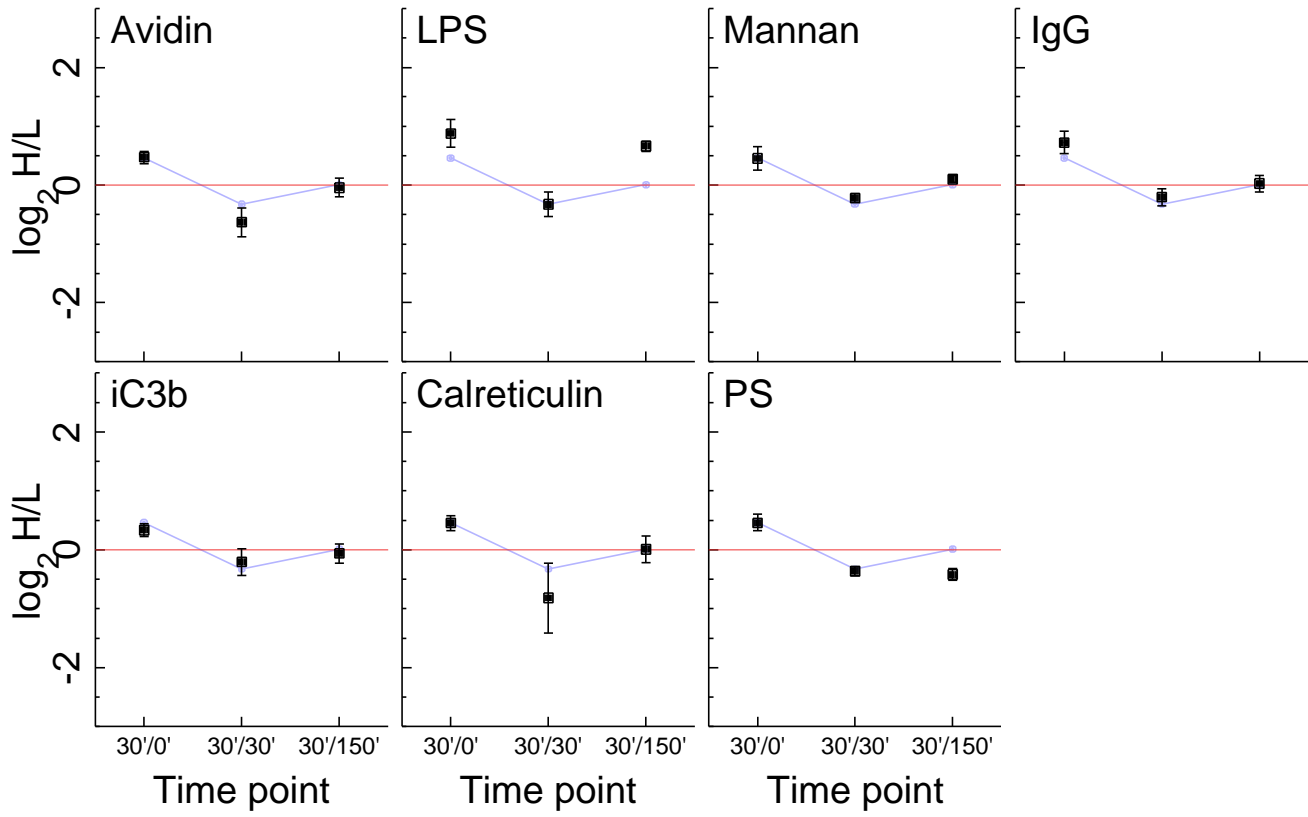

rpl3 (P27659)

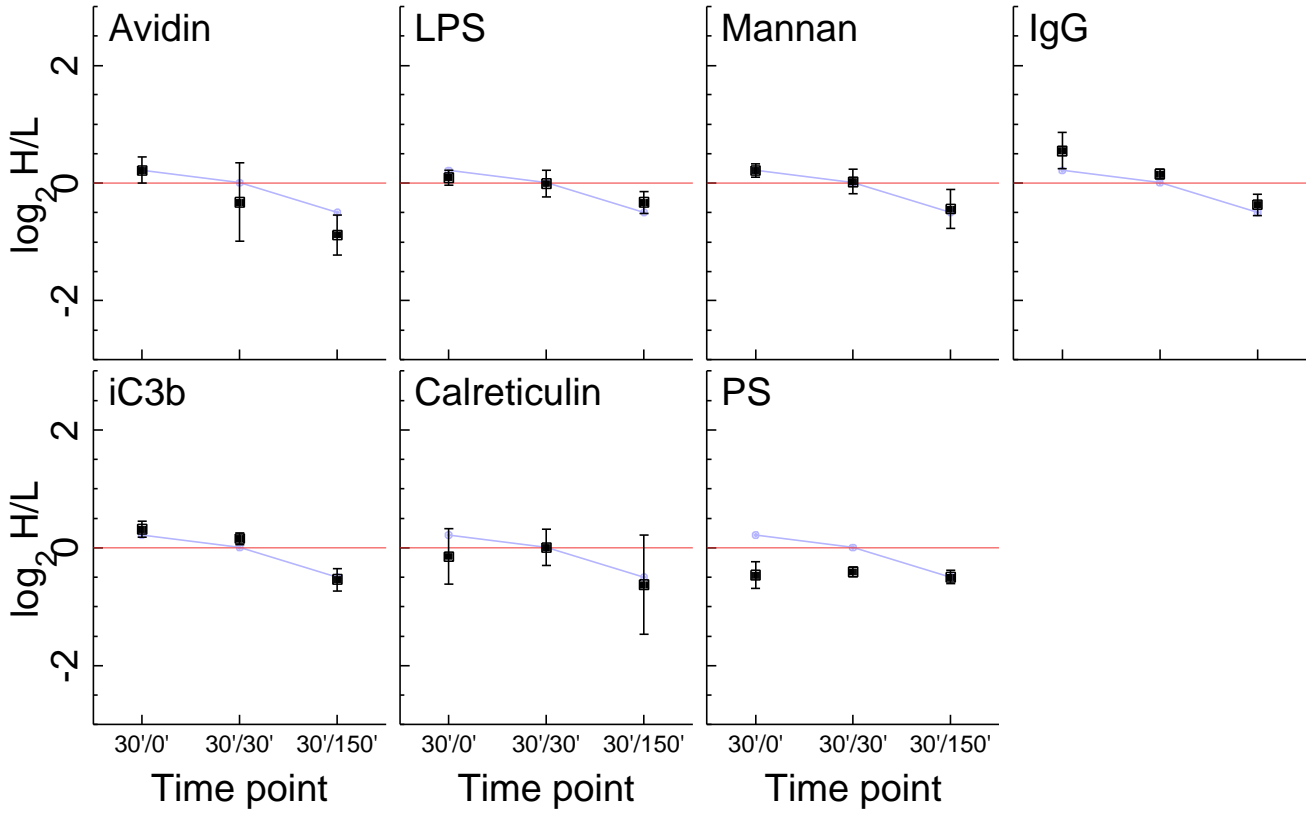

rpl4 (Q9D8E6)

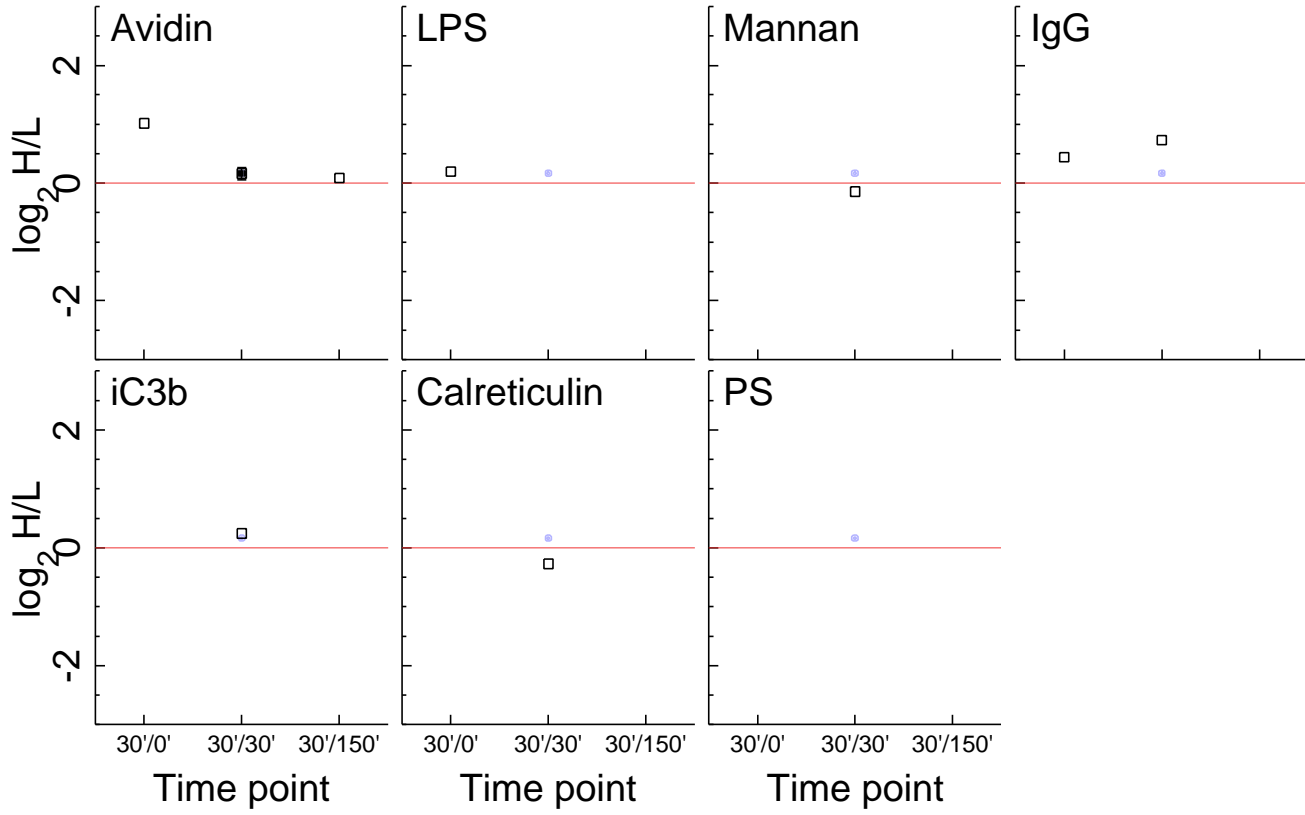



rpl5 (P47962)

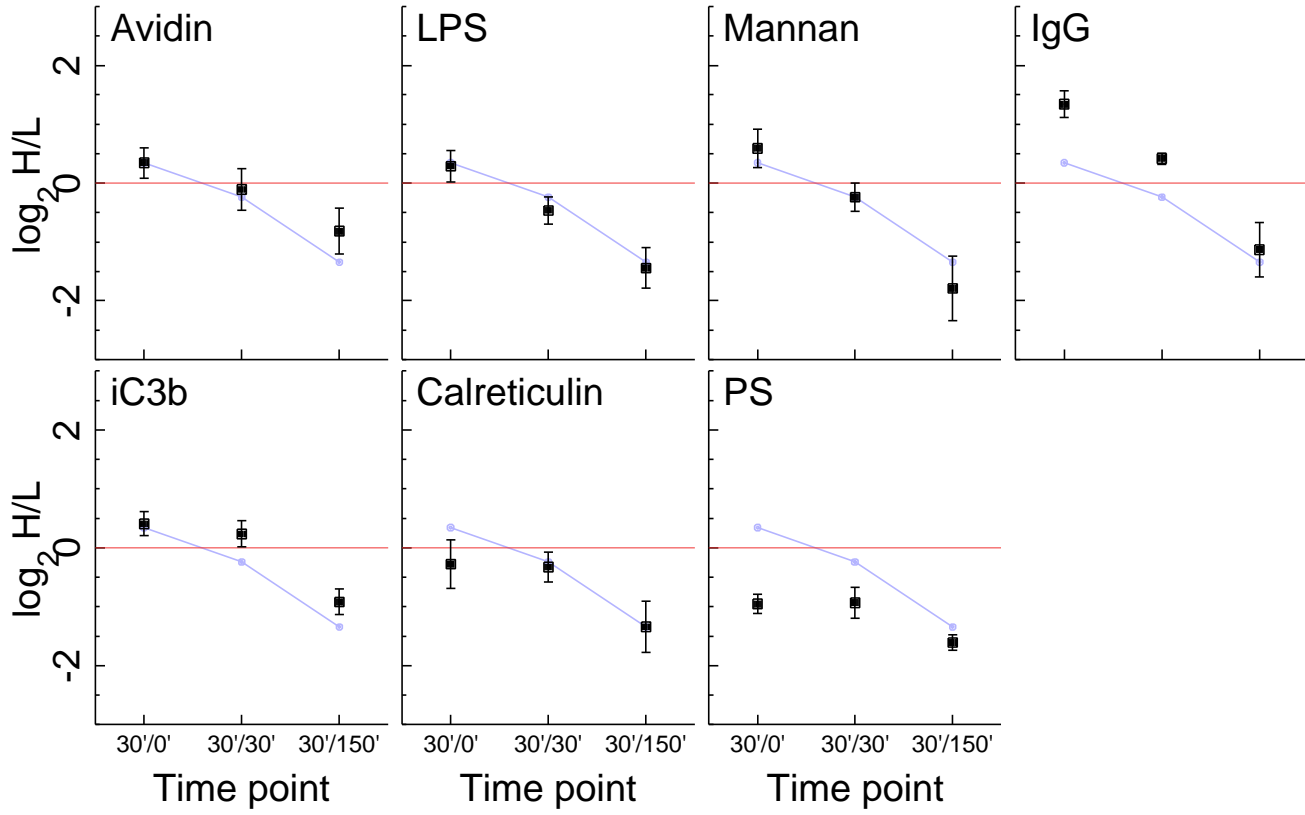

### rpl6 (P47911)

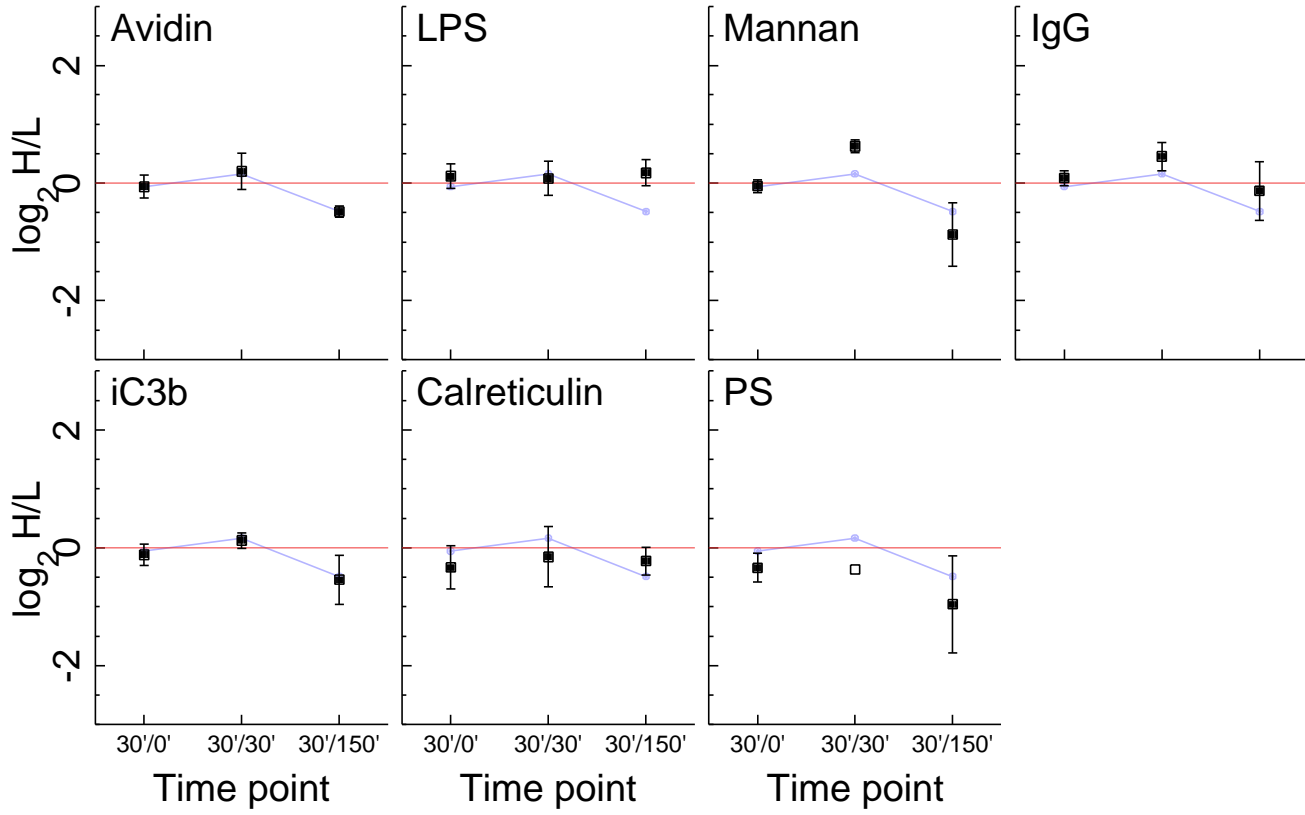

rpl8 (P62918)

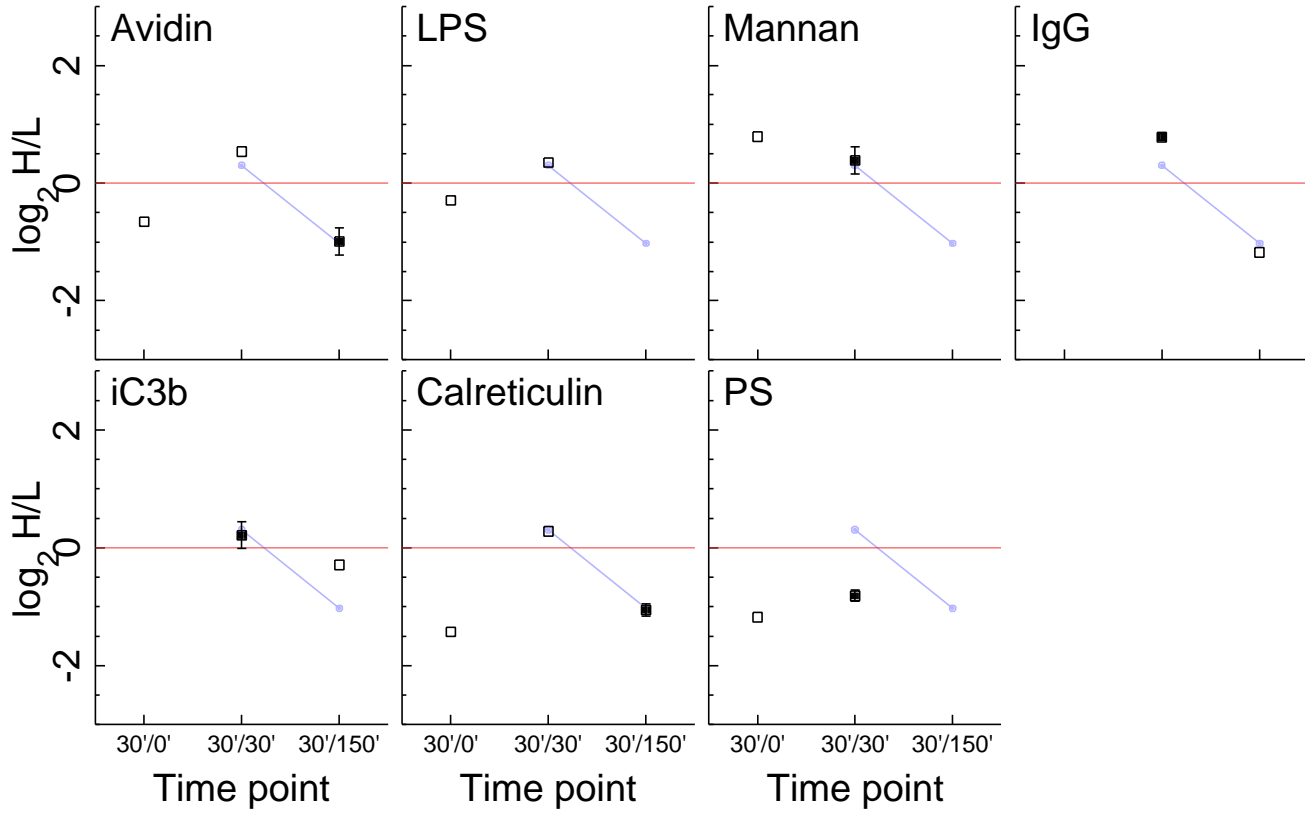

rpl9 (P51410)

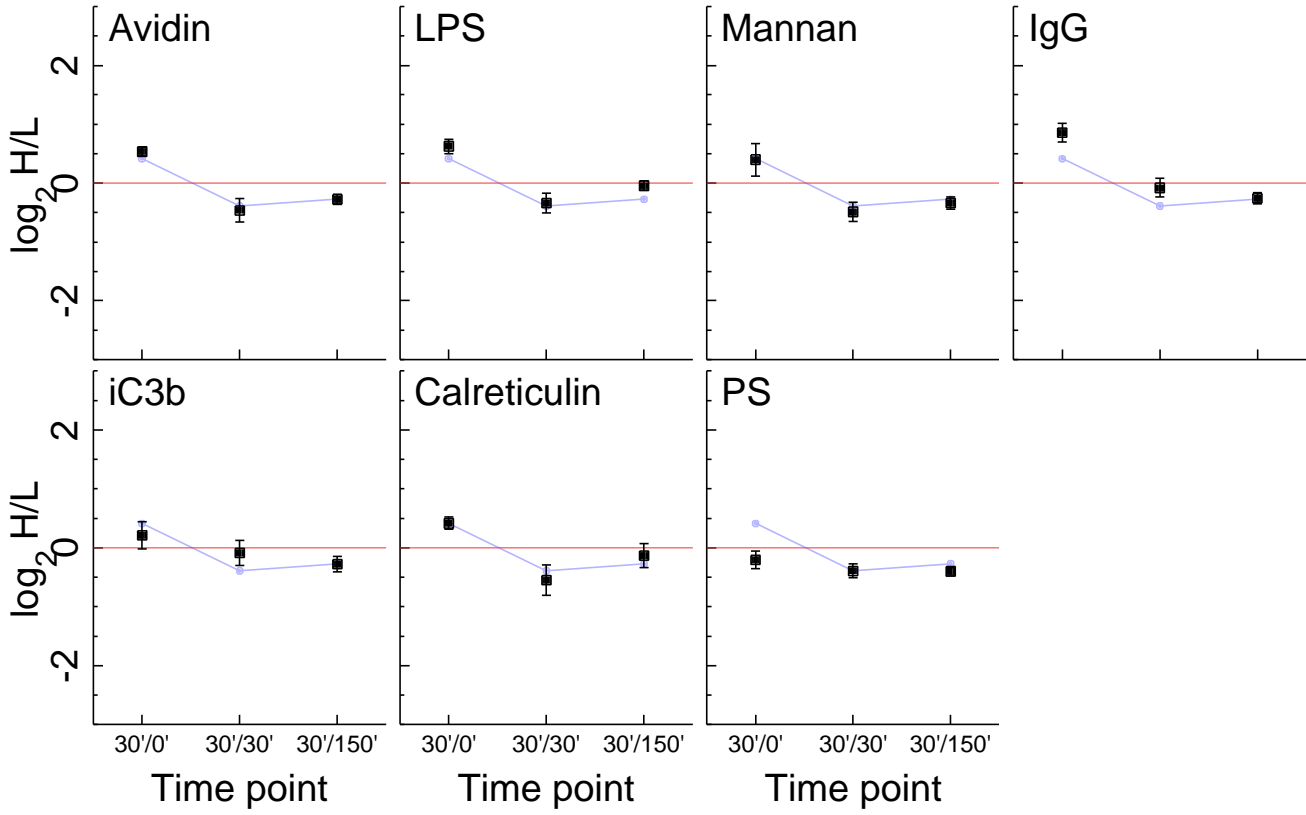

rplp0 (P14869)

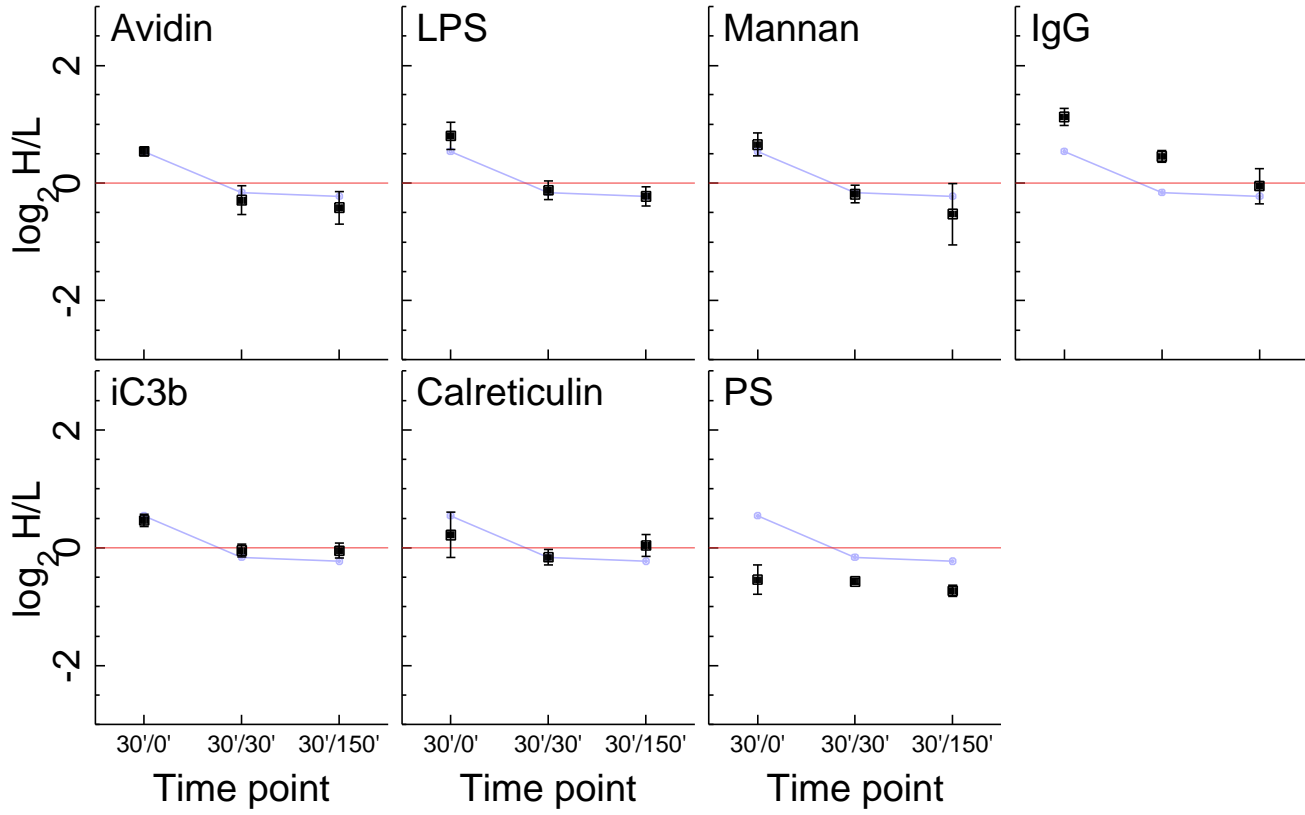

### rplp1 (P47955)

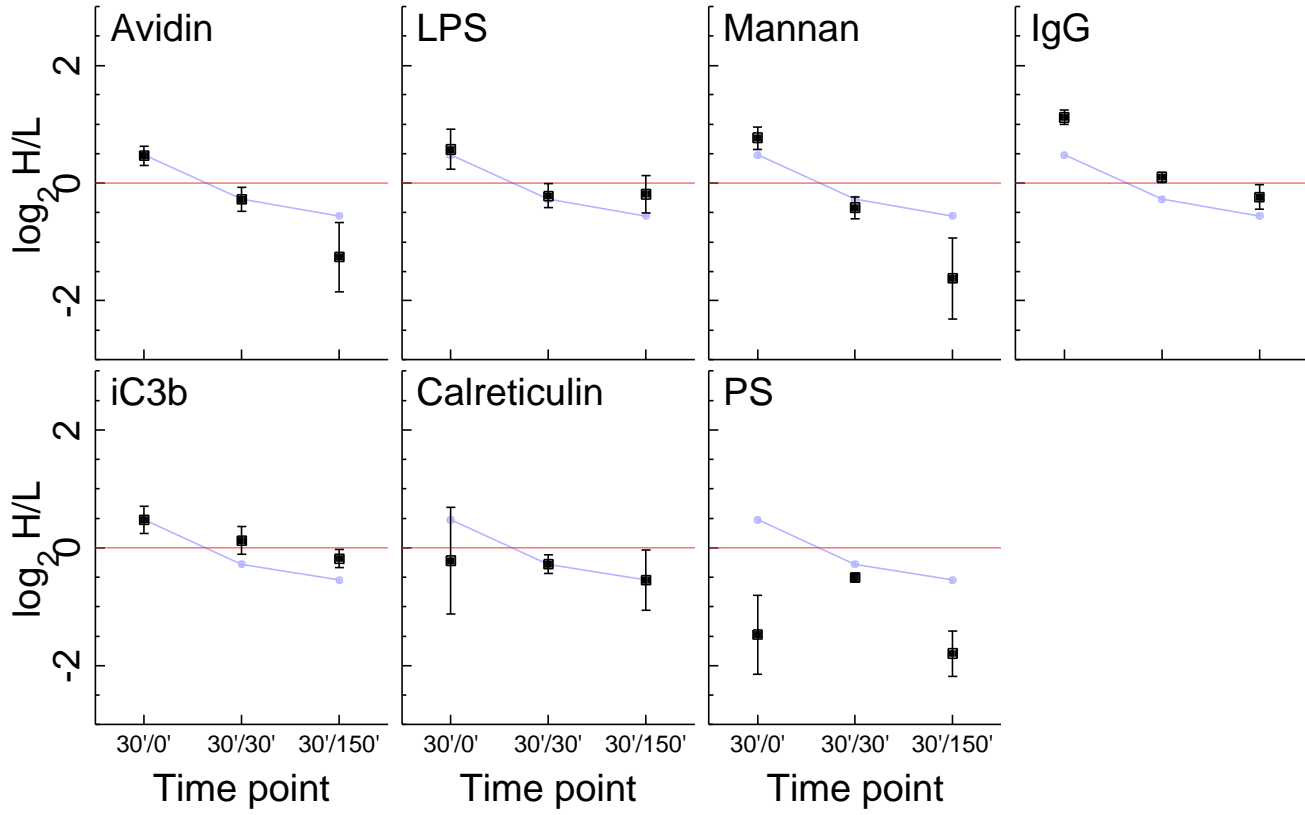

### rplp2 (P99027)

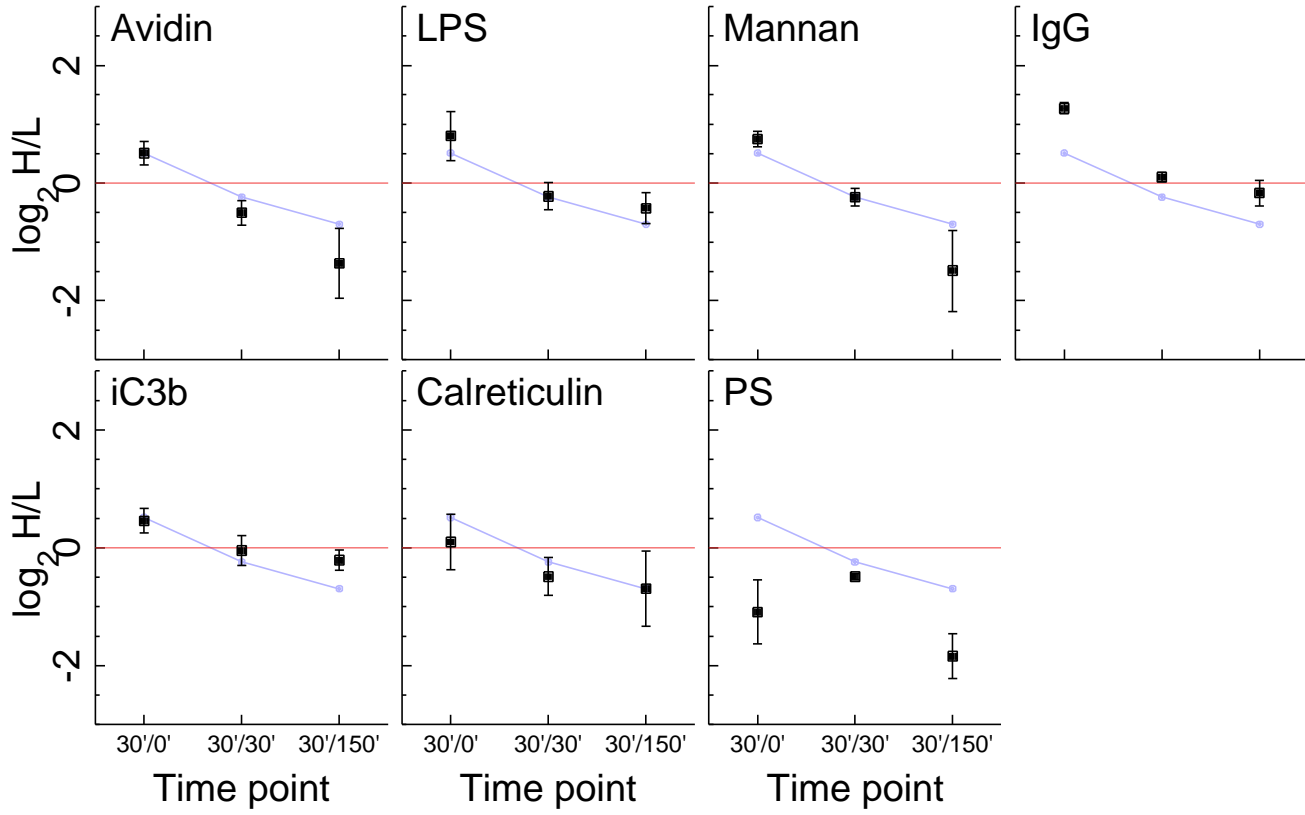

rpn1 (Q91YQ5)

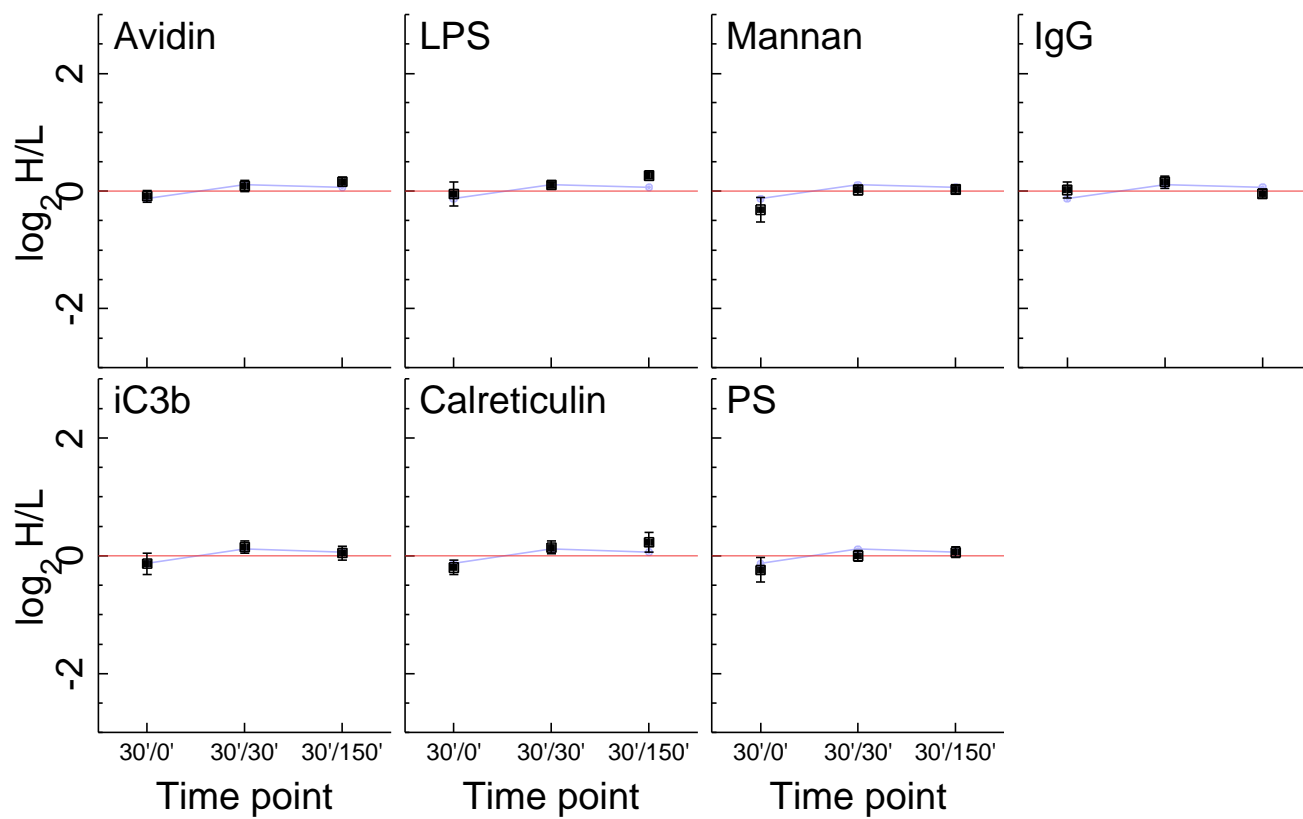



rpn2 (Q9DBG6)

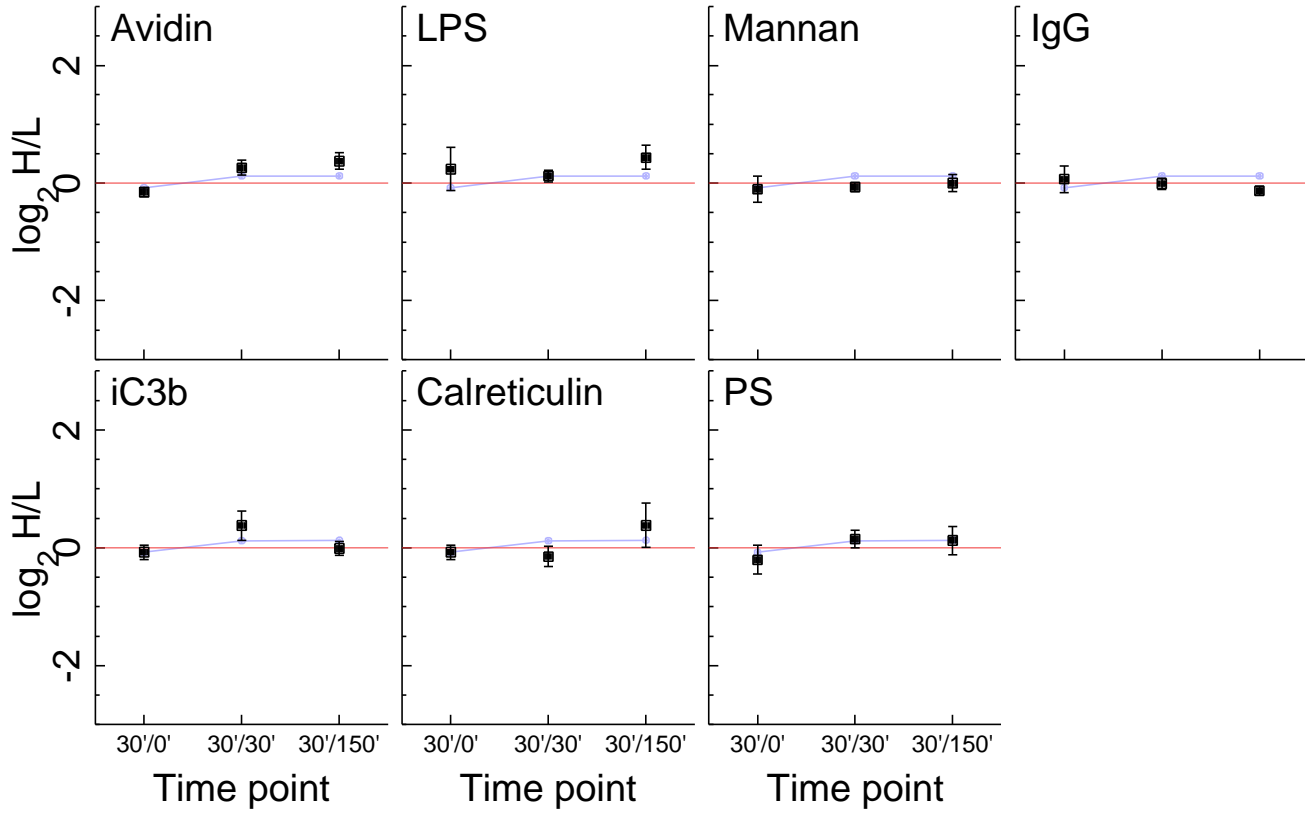

rprd2 (Q6NXI6)

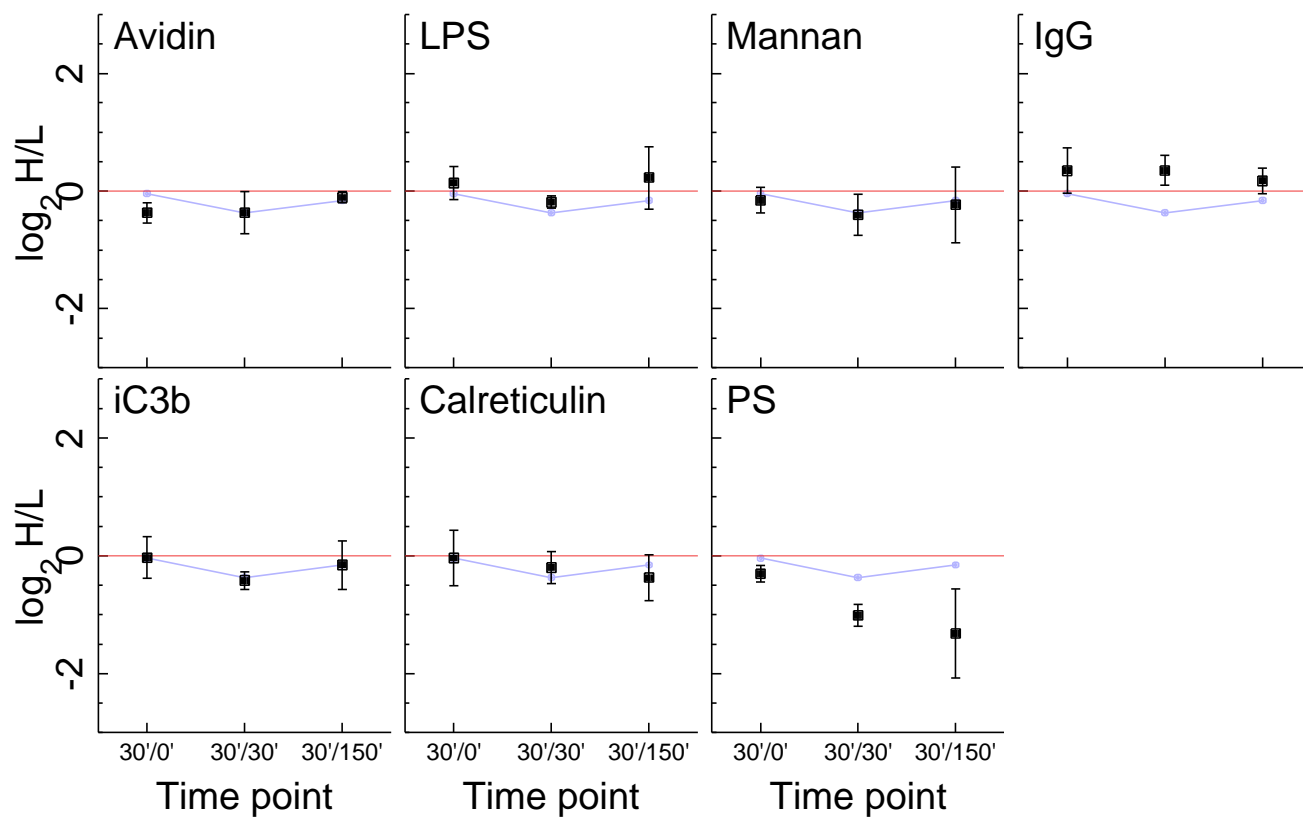

### rps10 (P63325)

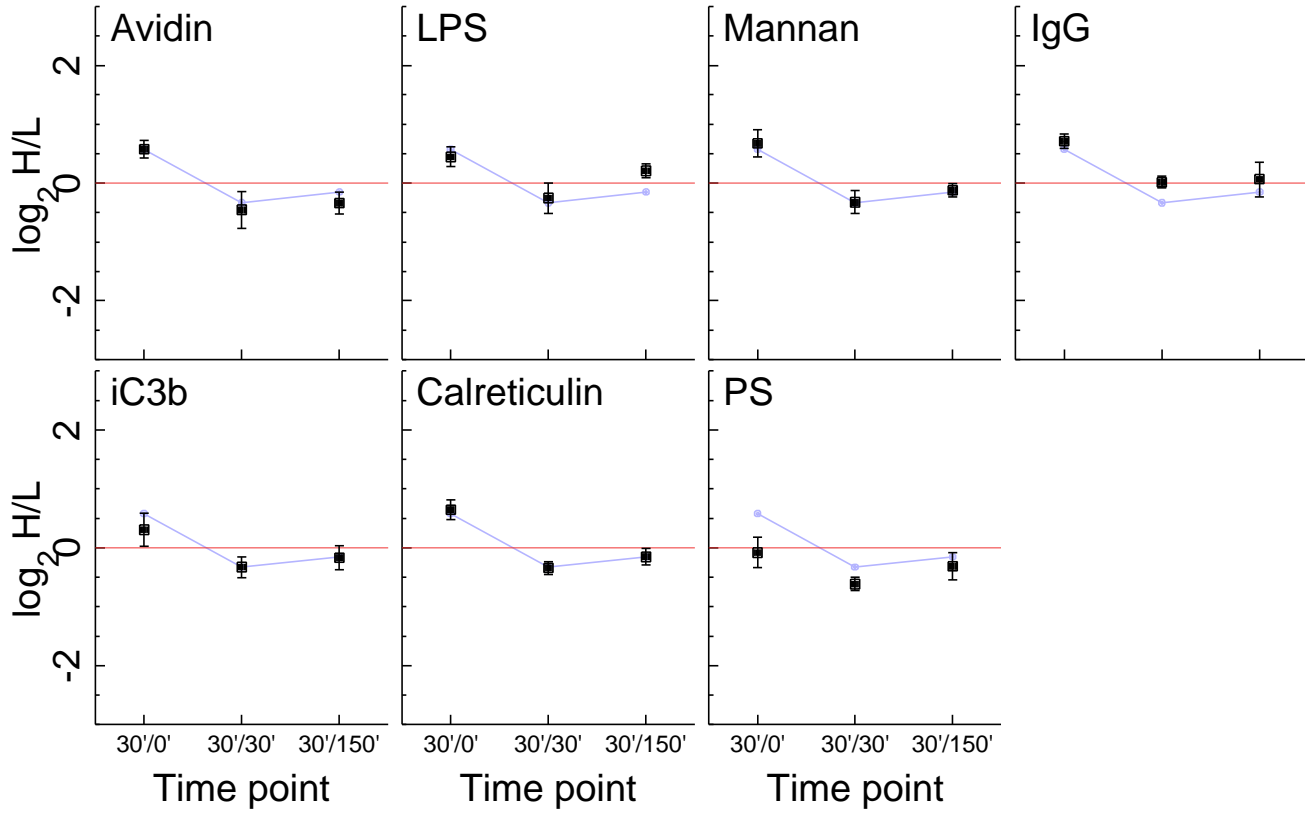

rps11 (P62281)

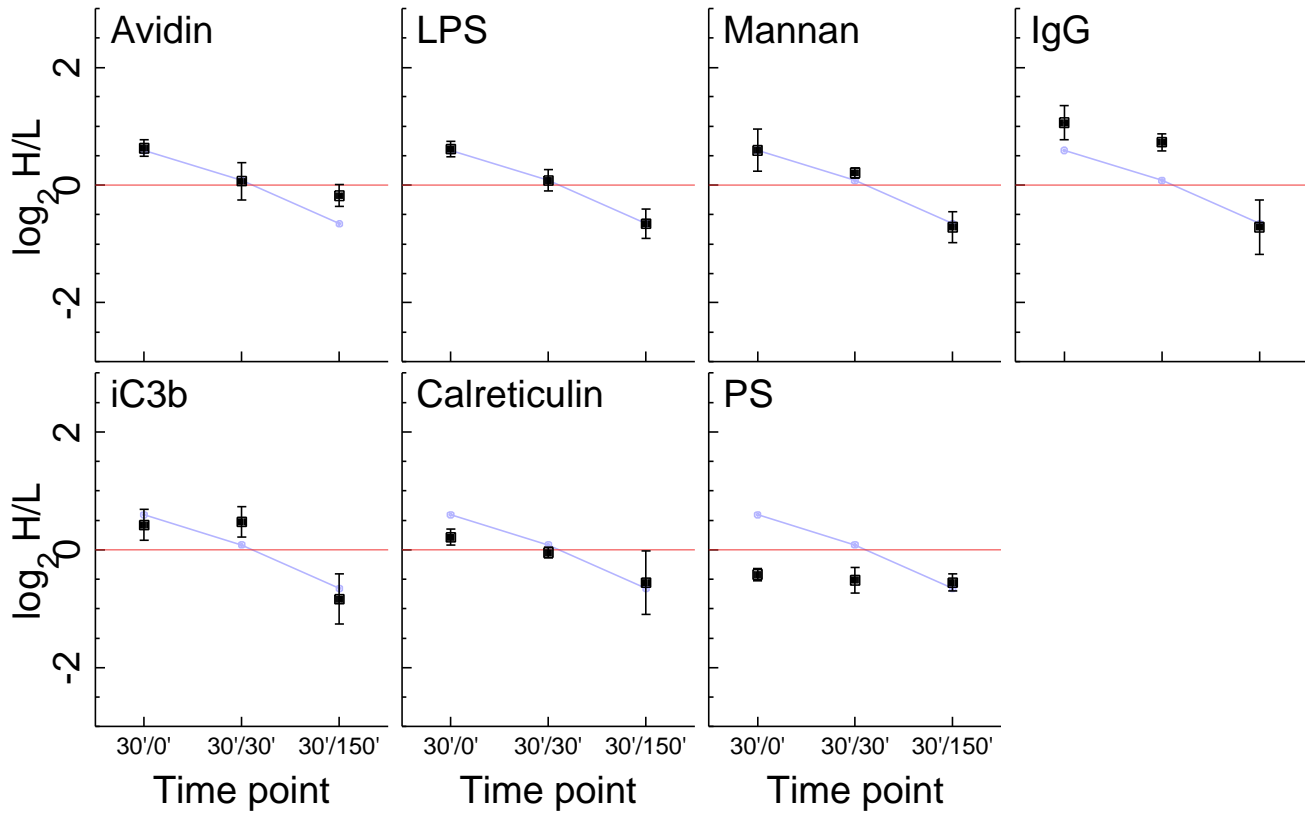

rps12 (Q6ZWZ6)

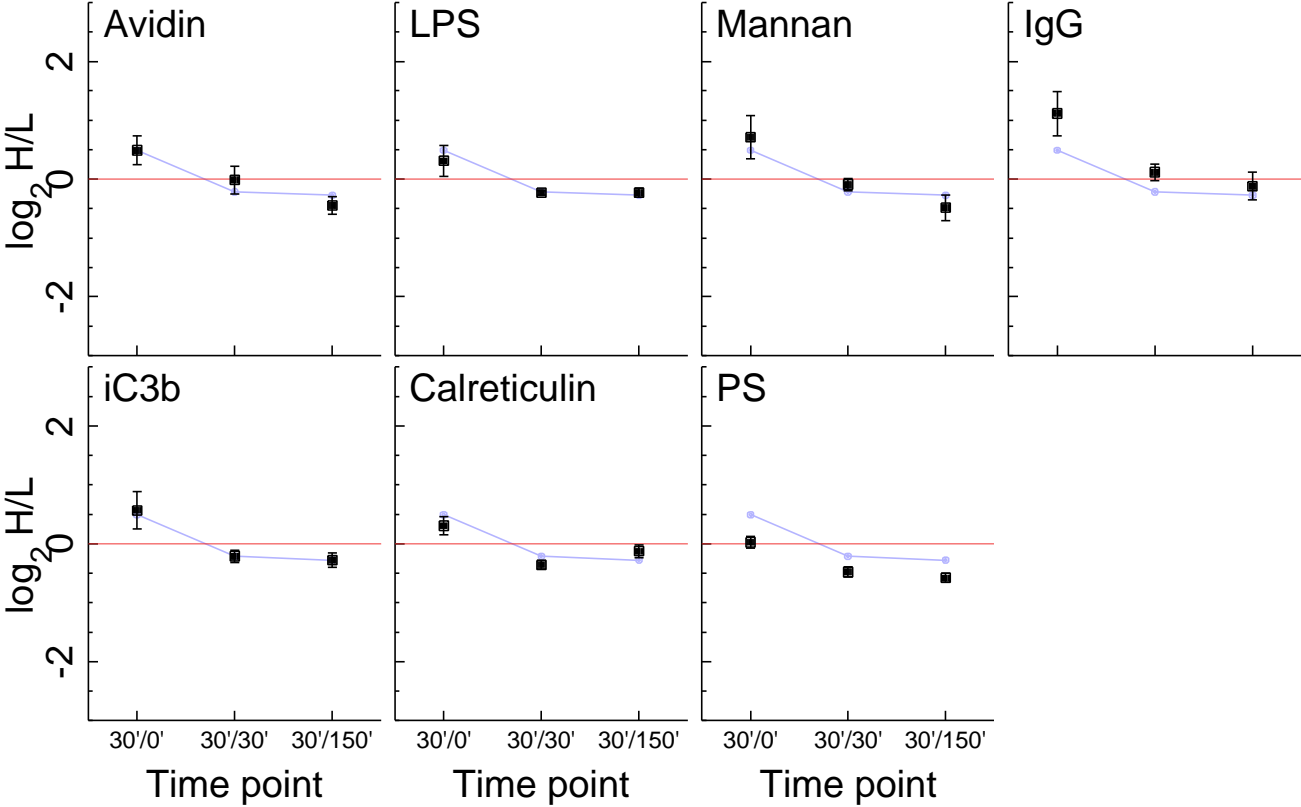

### rps13 (P62301)

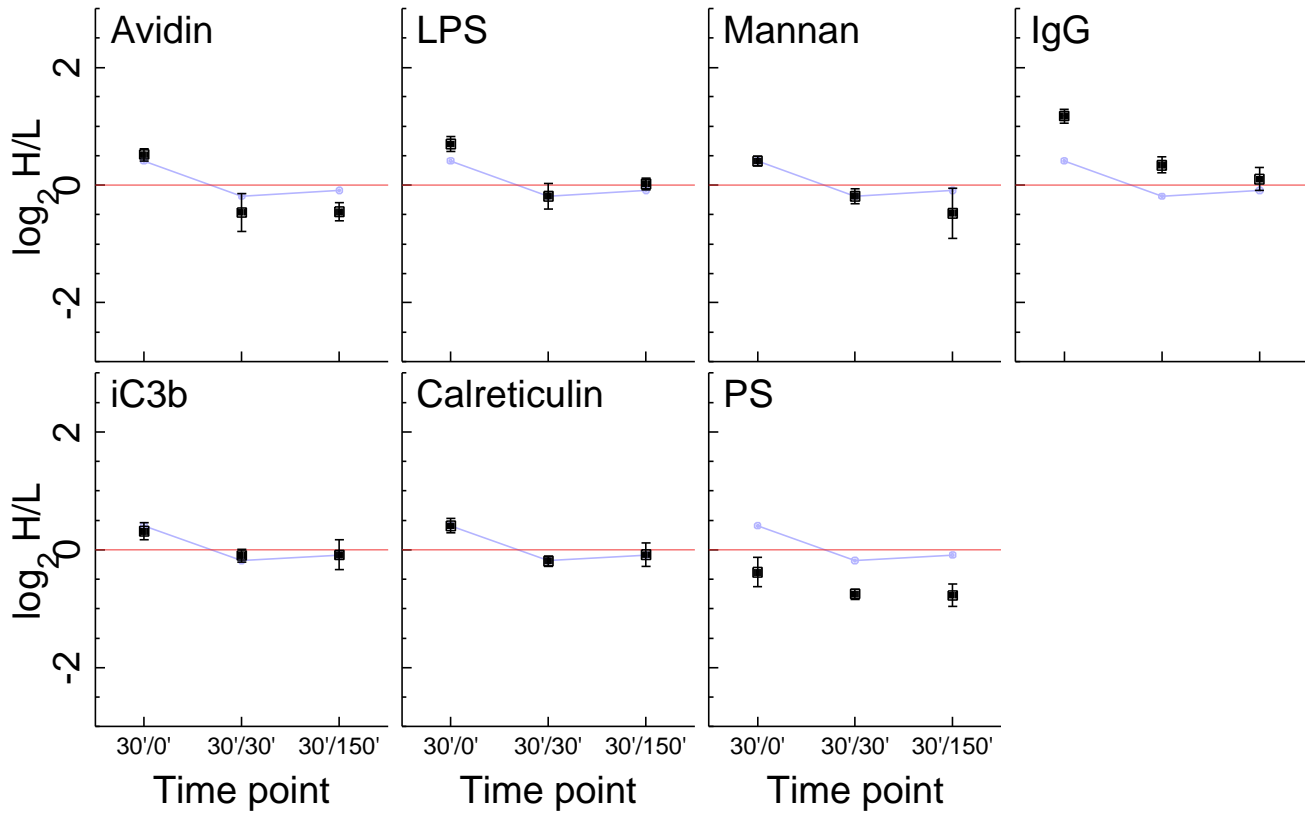

rps14 (P62264)

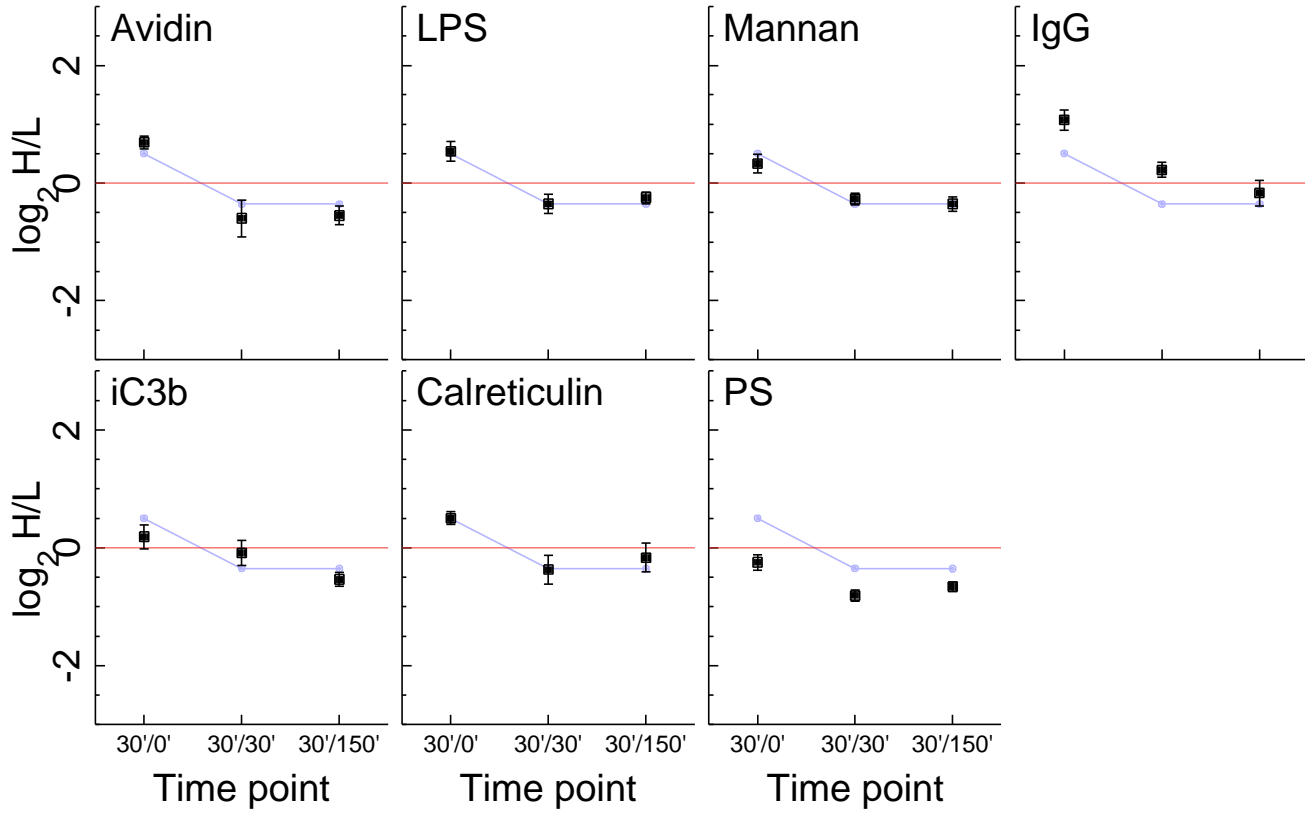

rps15a (P62245)

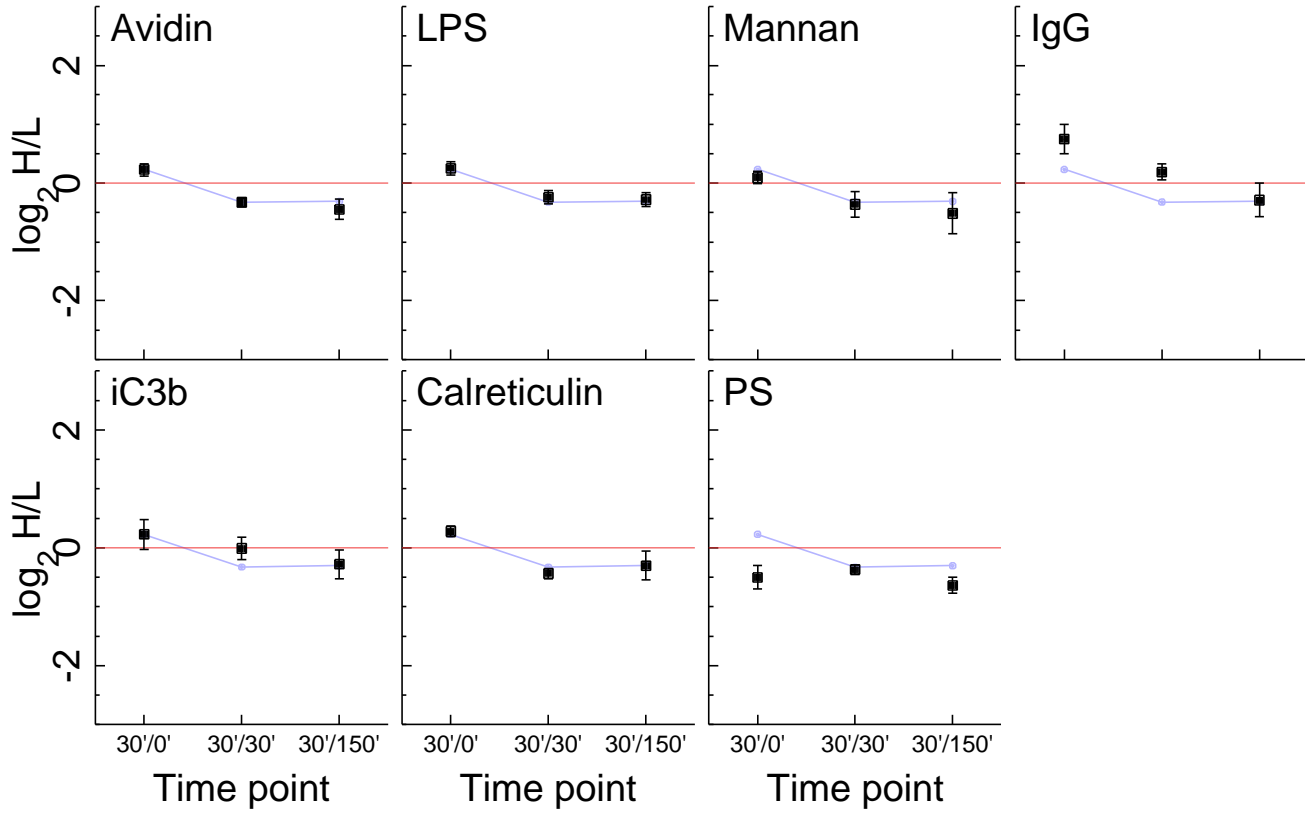



rps15 (P62843)

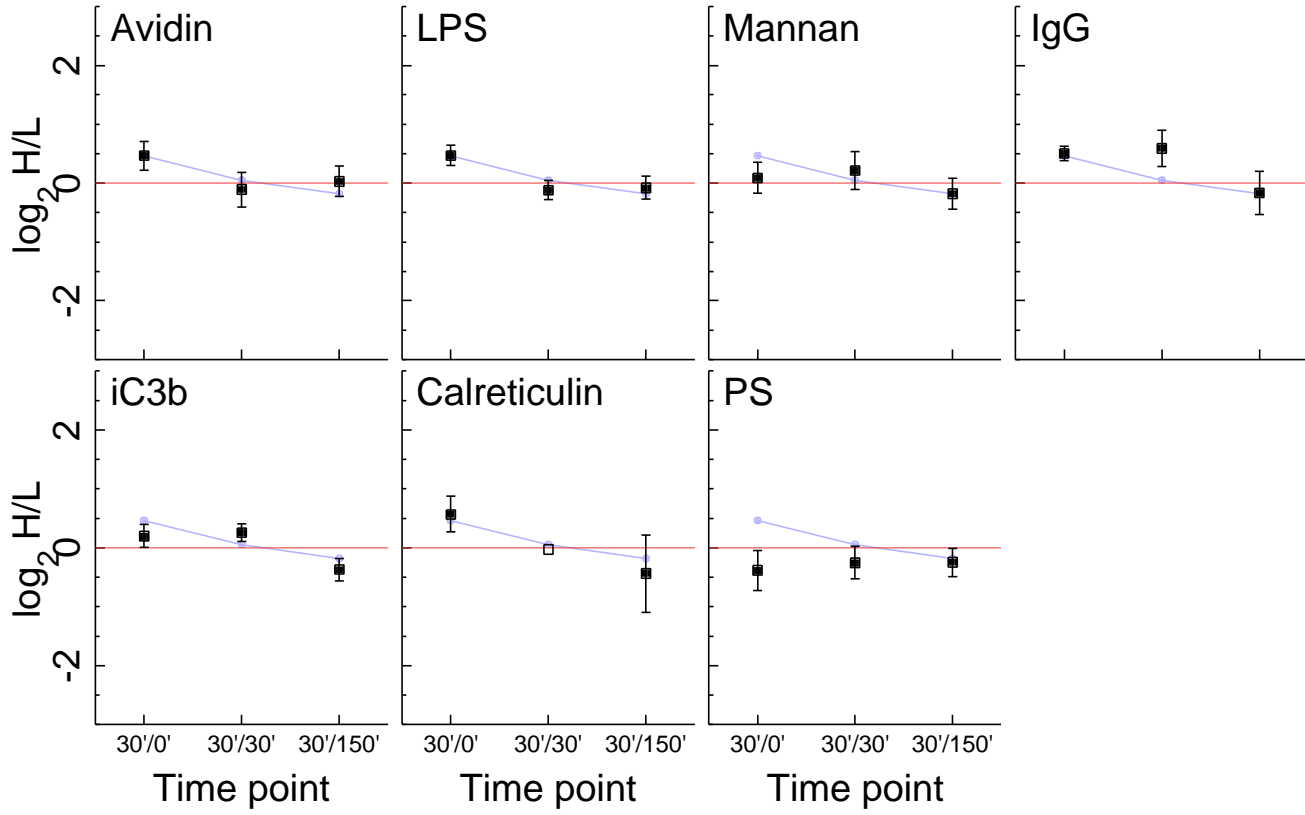

rps16 (P14131)

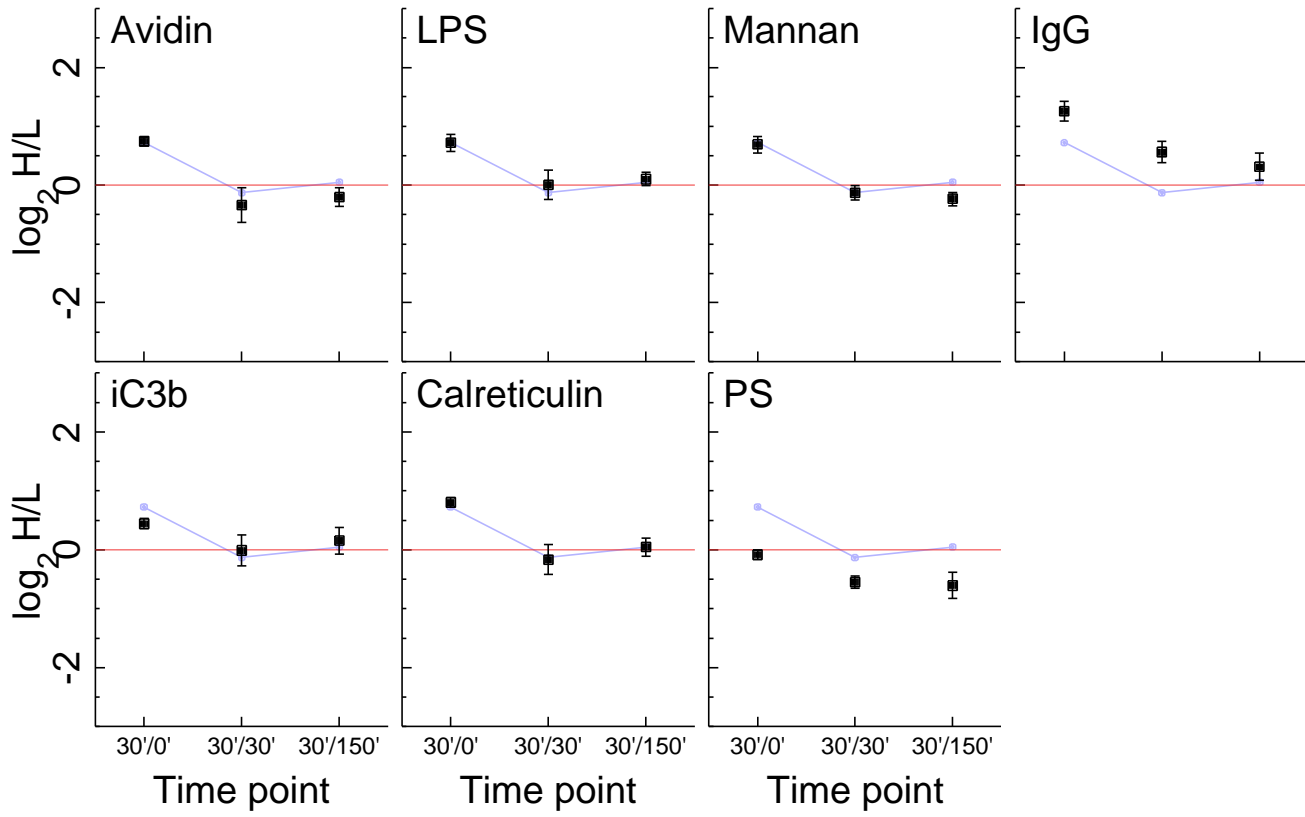

rps17 (P63276)

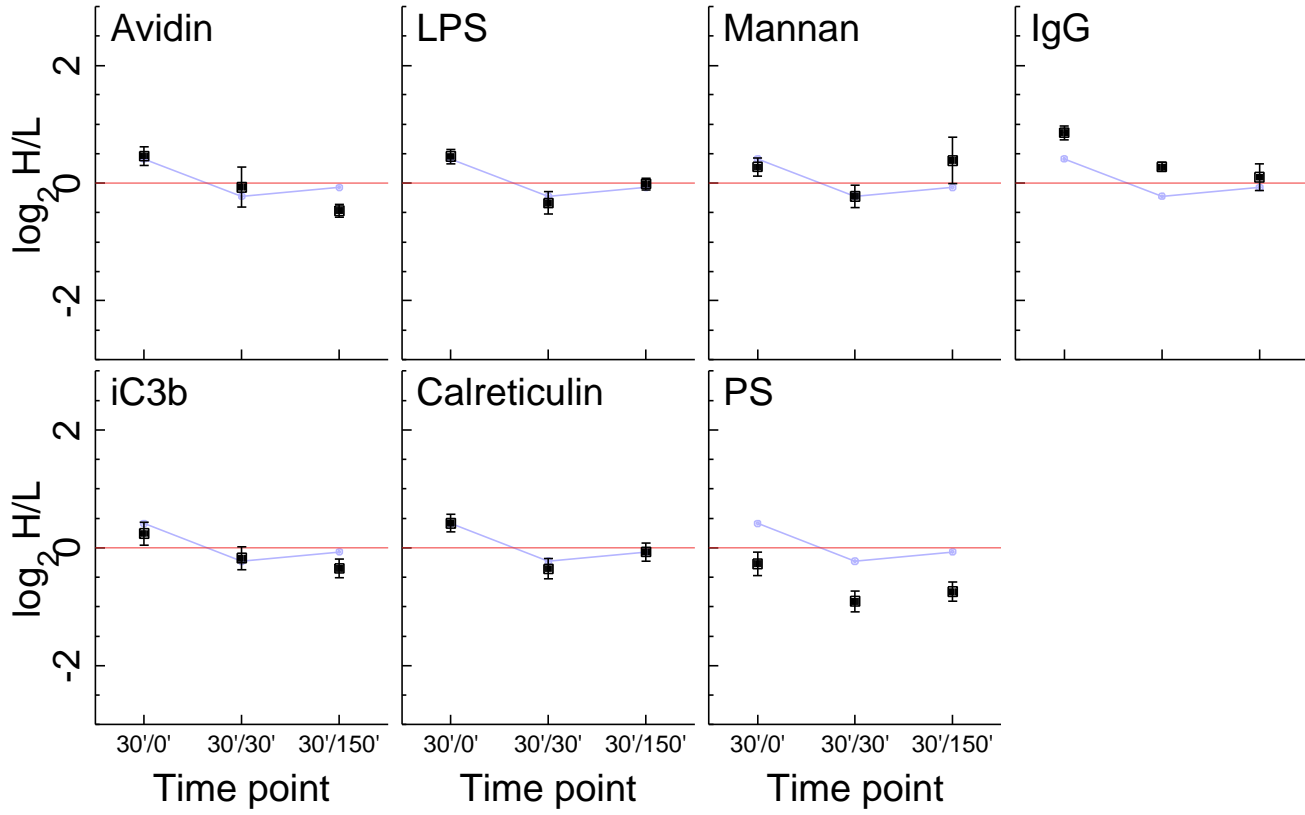

### rps19 (Q9CZX8)

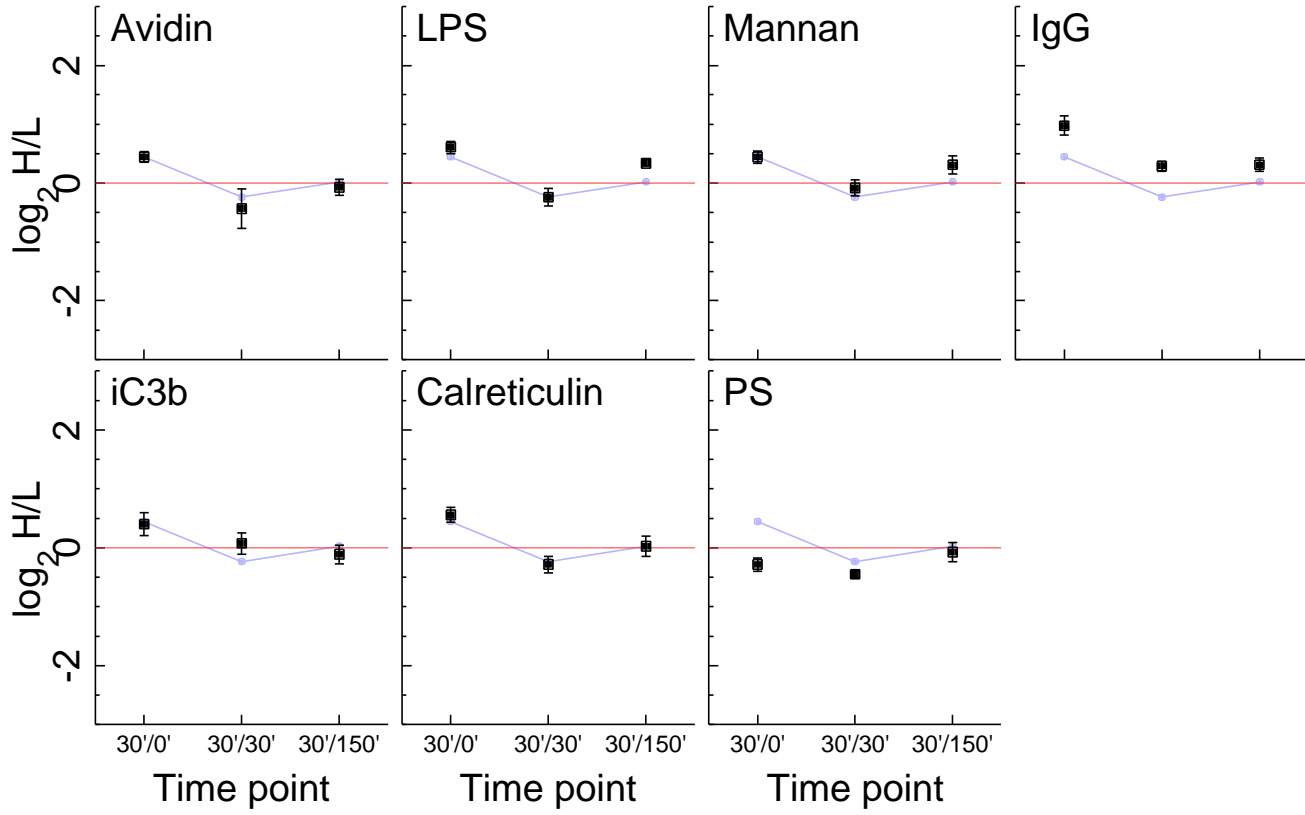

rps20 (P60867)

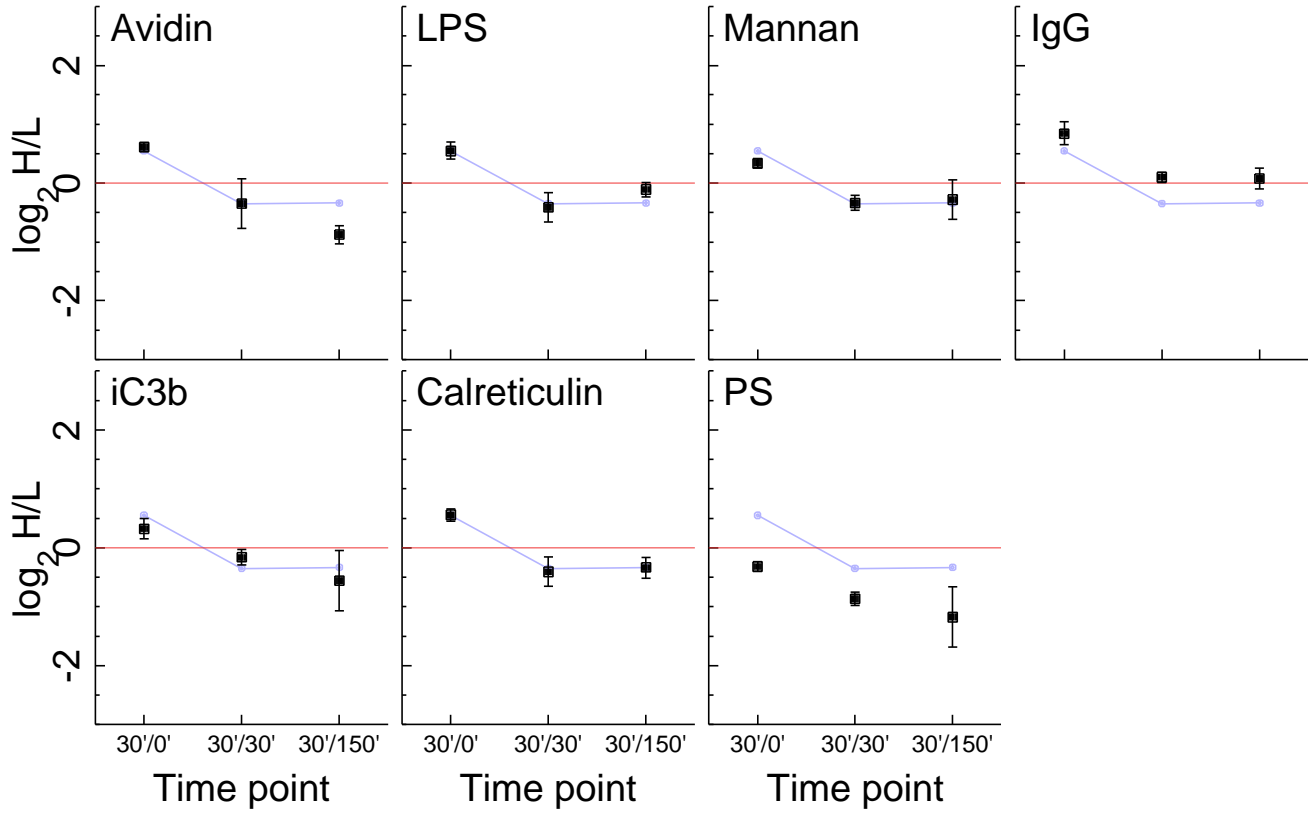

rps21 (Q9CQR2)

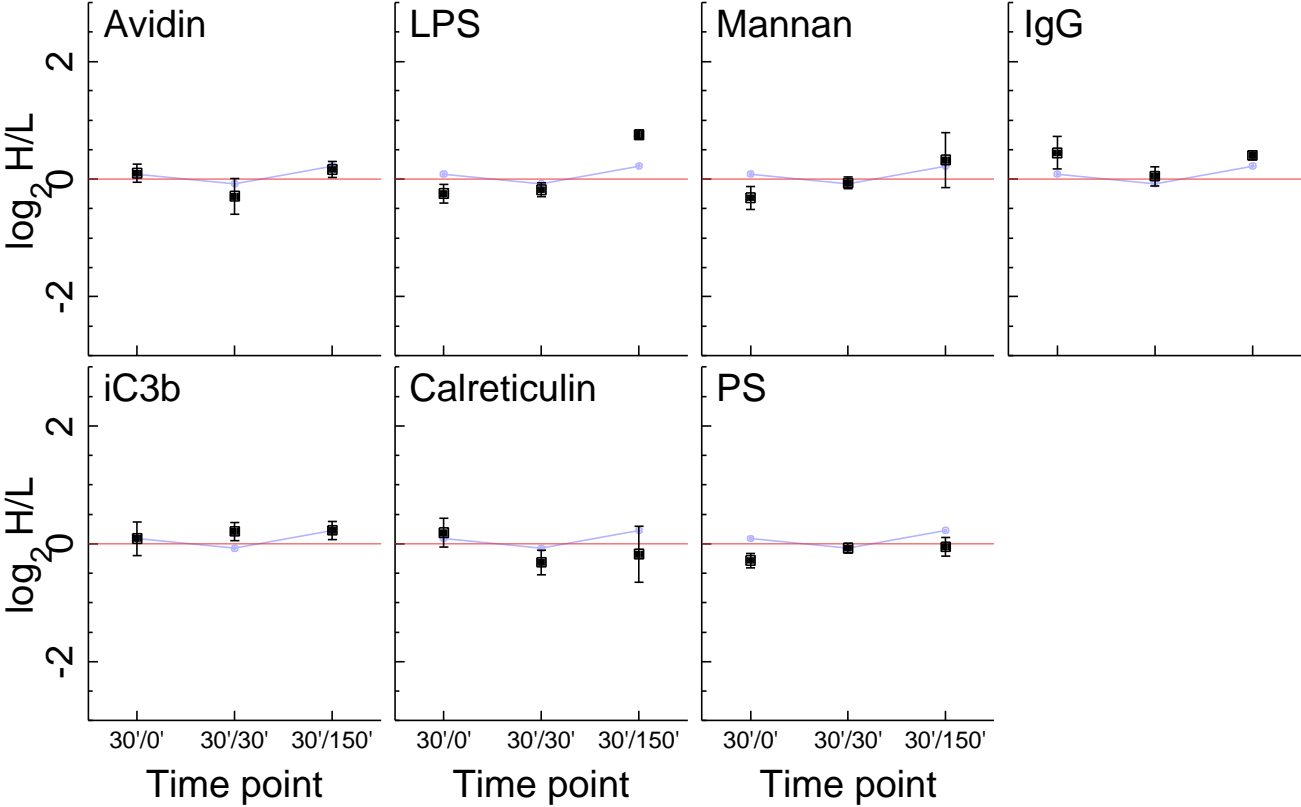

rps23 (P62267)

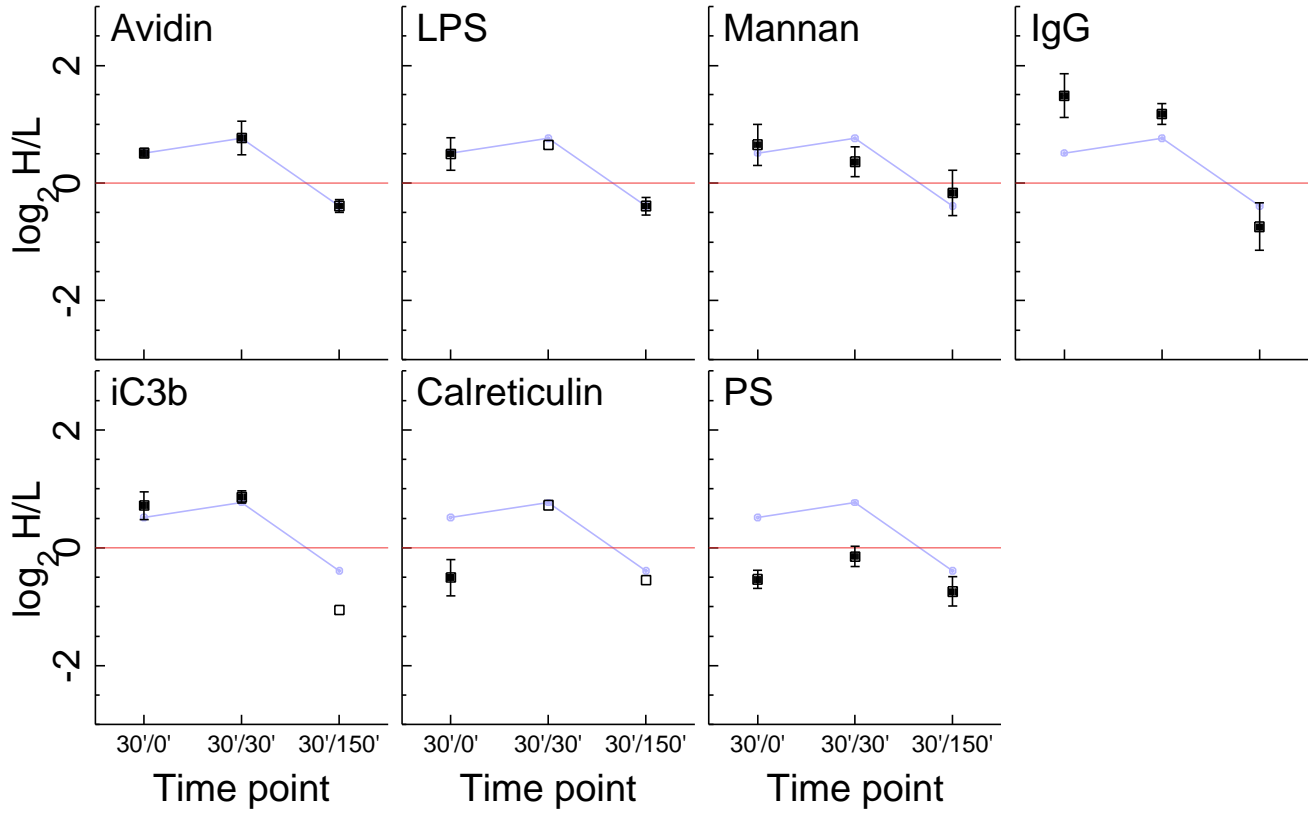

rps25 (P62852)

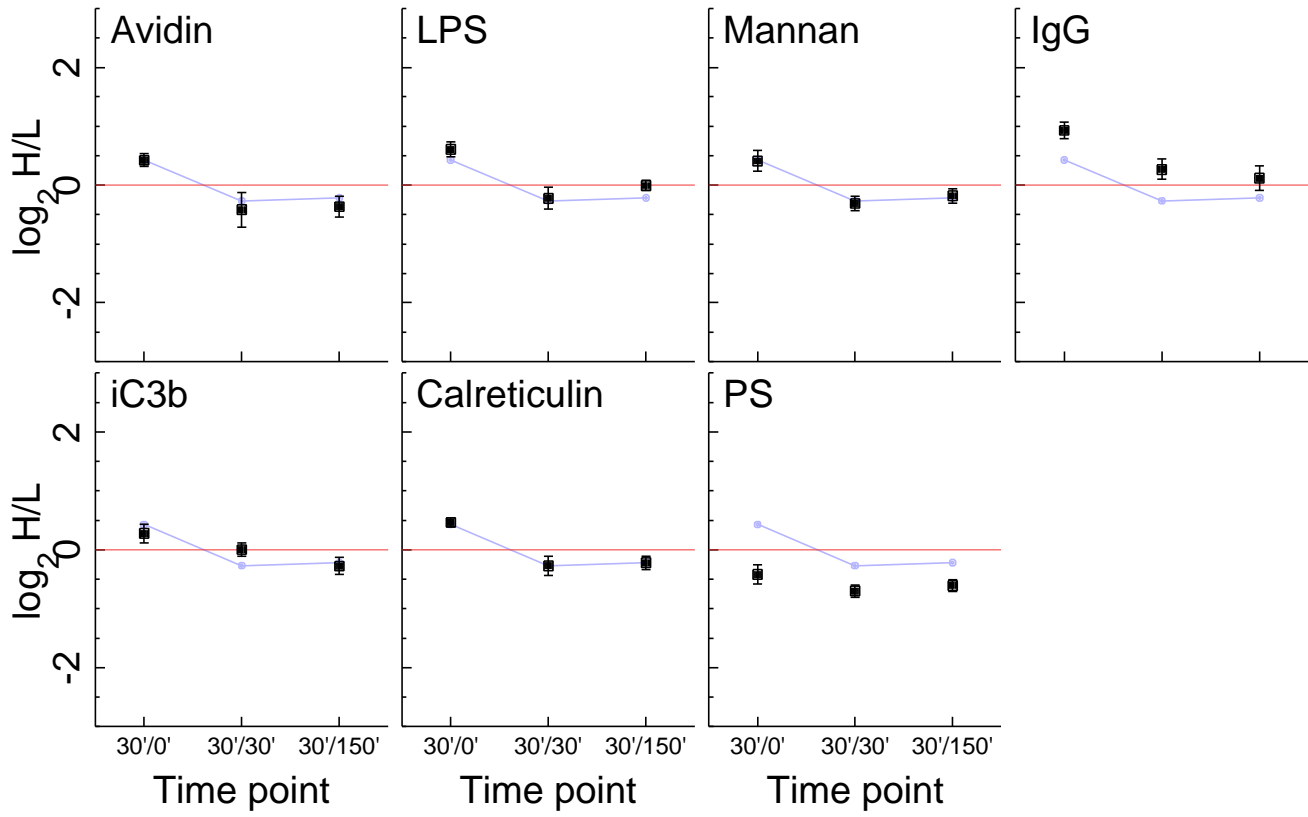



rps26 (P62855)

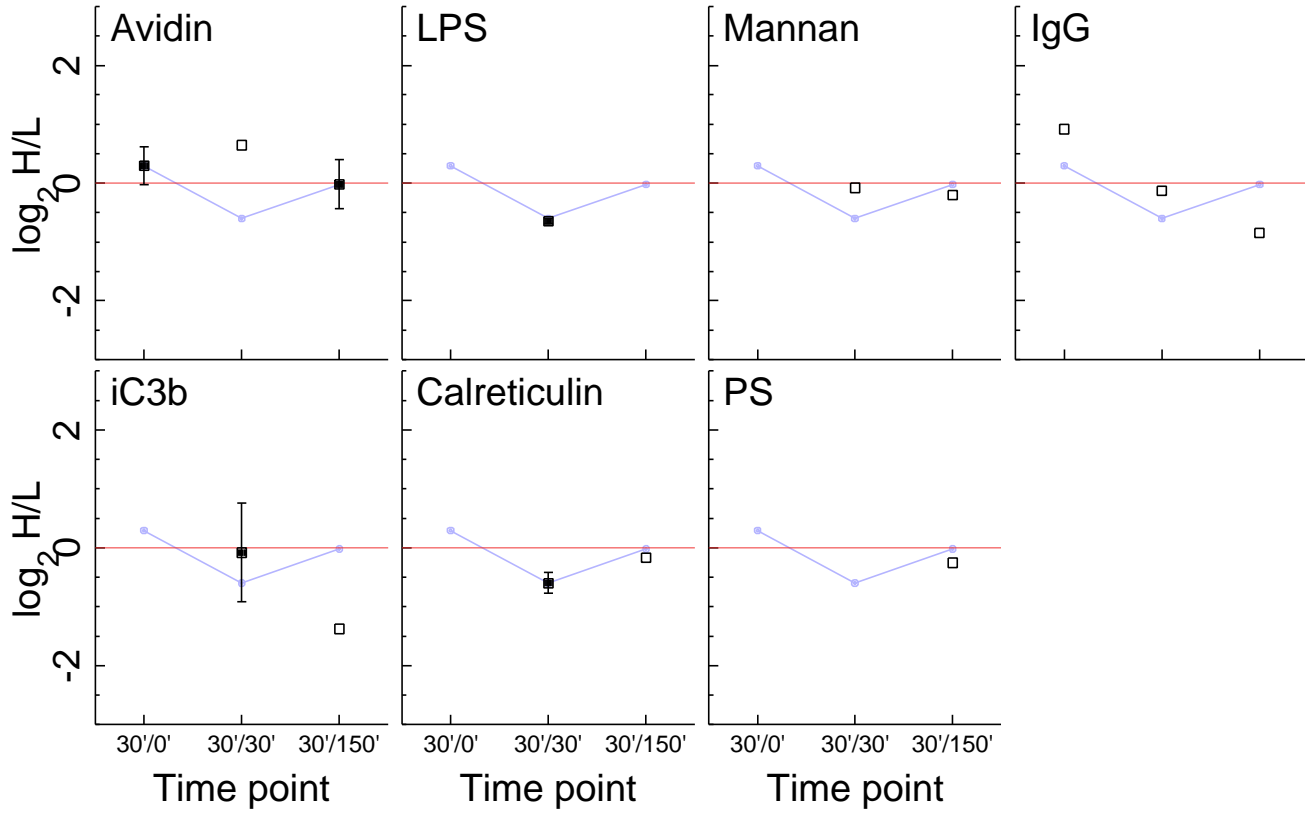

rps27a (P62983)

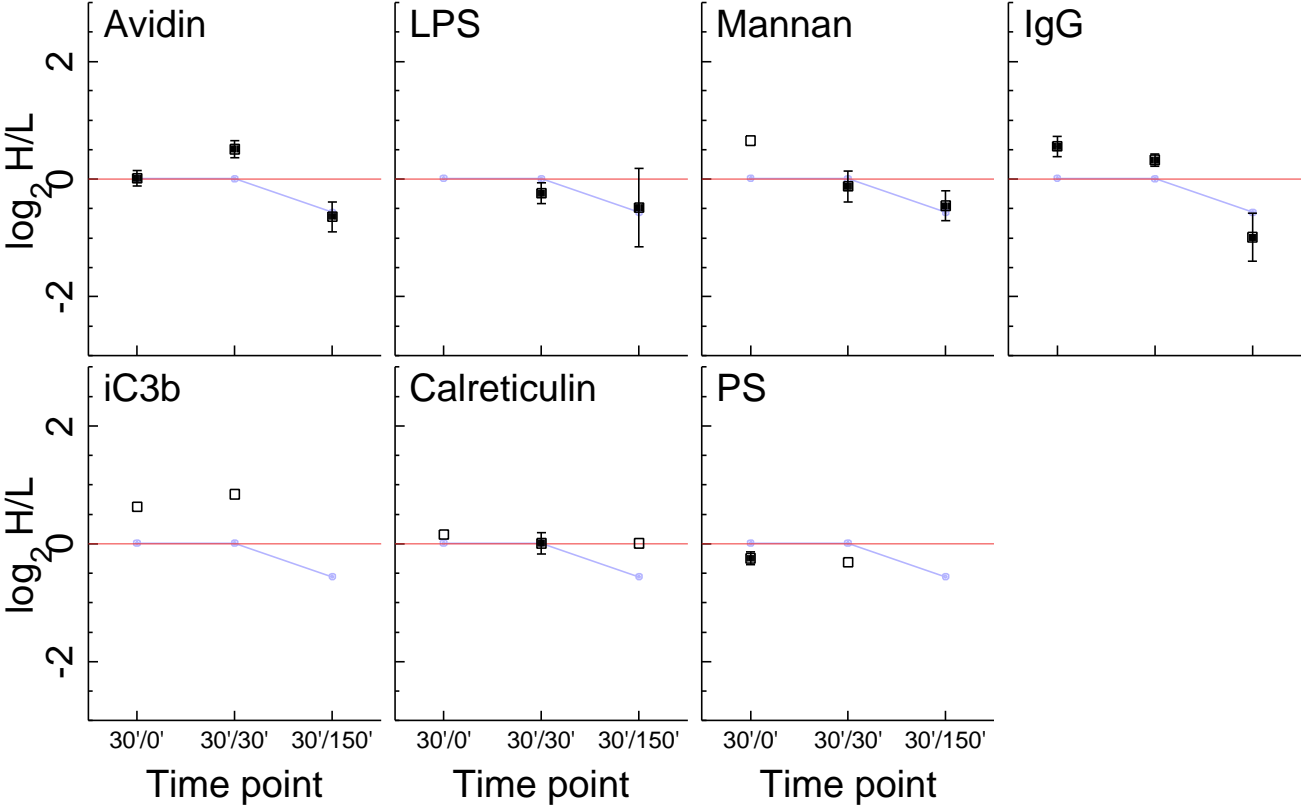

rps27l (Q6ZWY3)

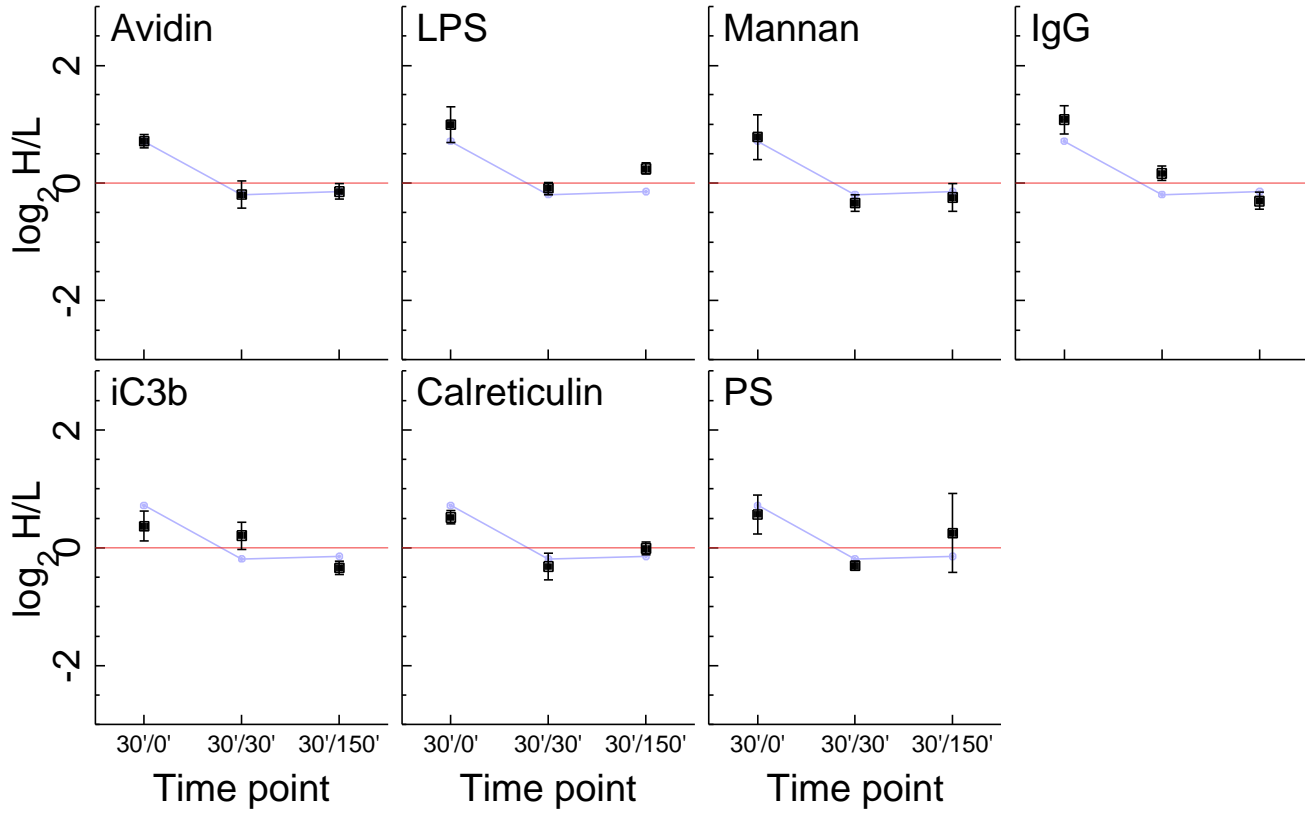

rps28 (P62858)

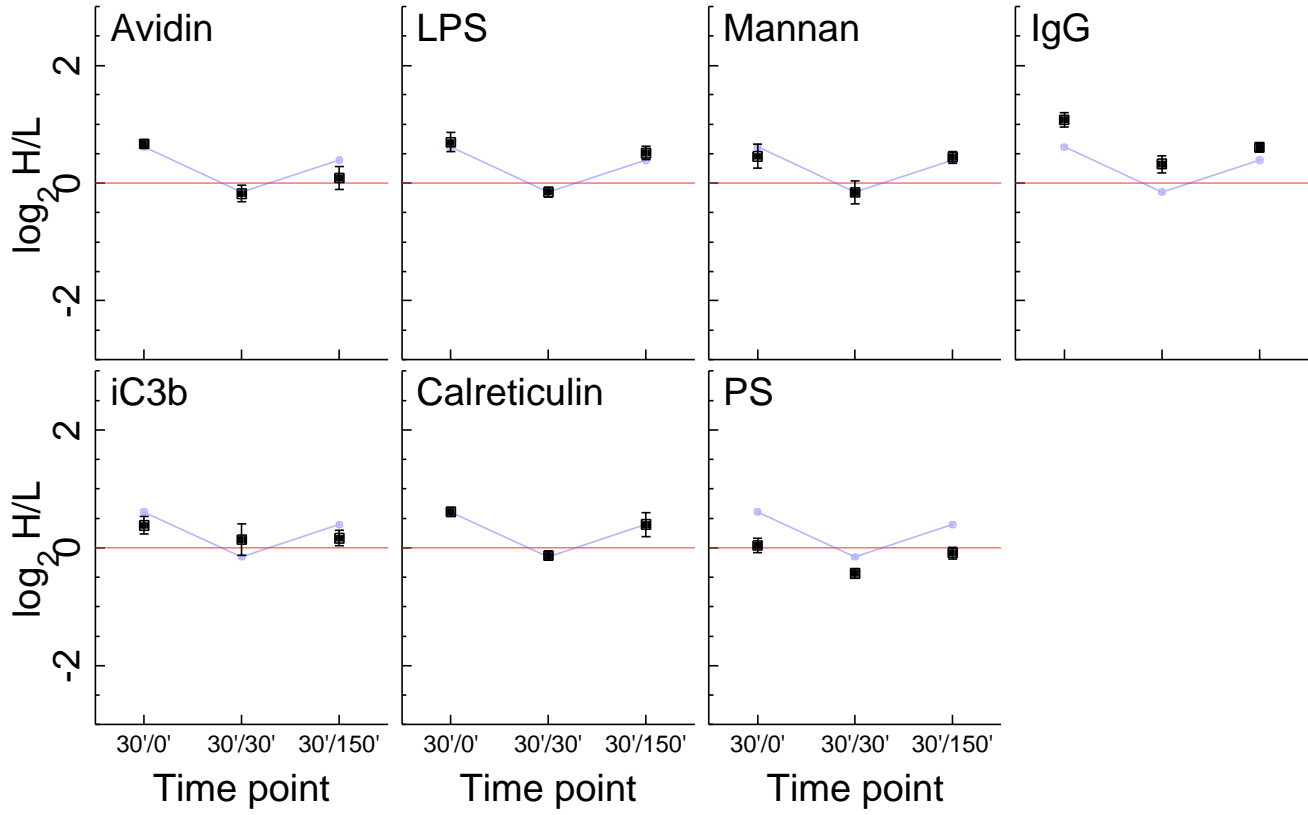

rps2 (P25444)

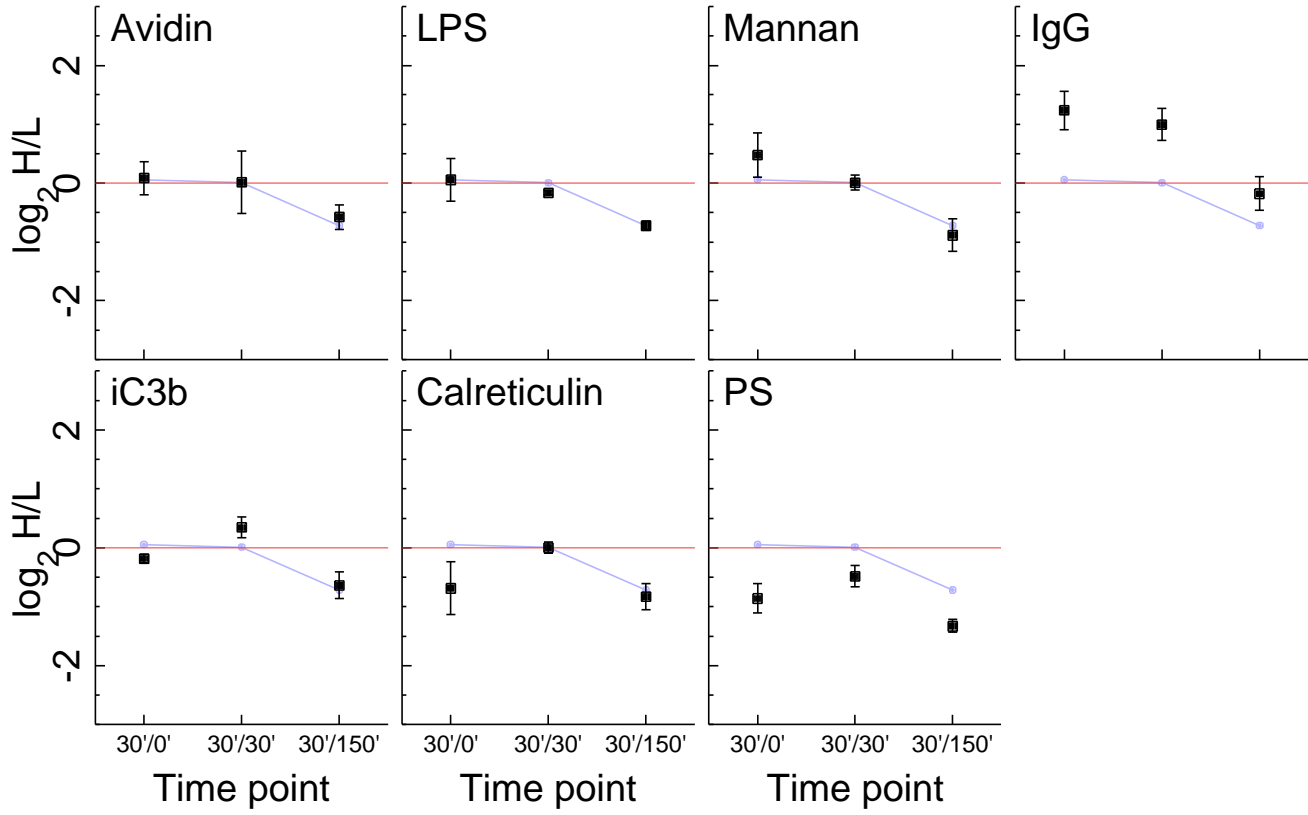

rps3 (P62908)

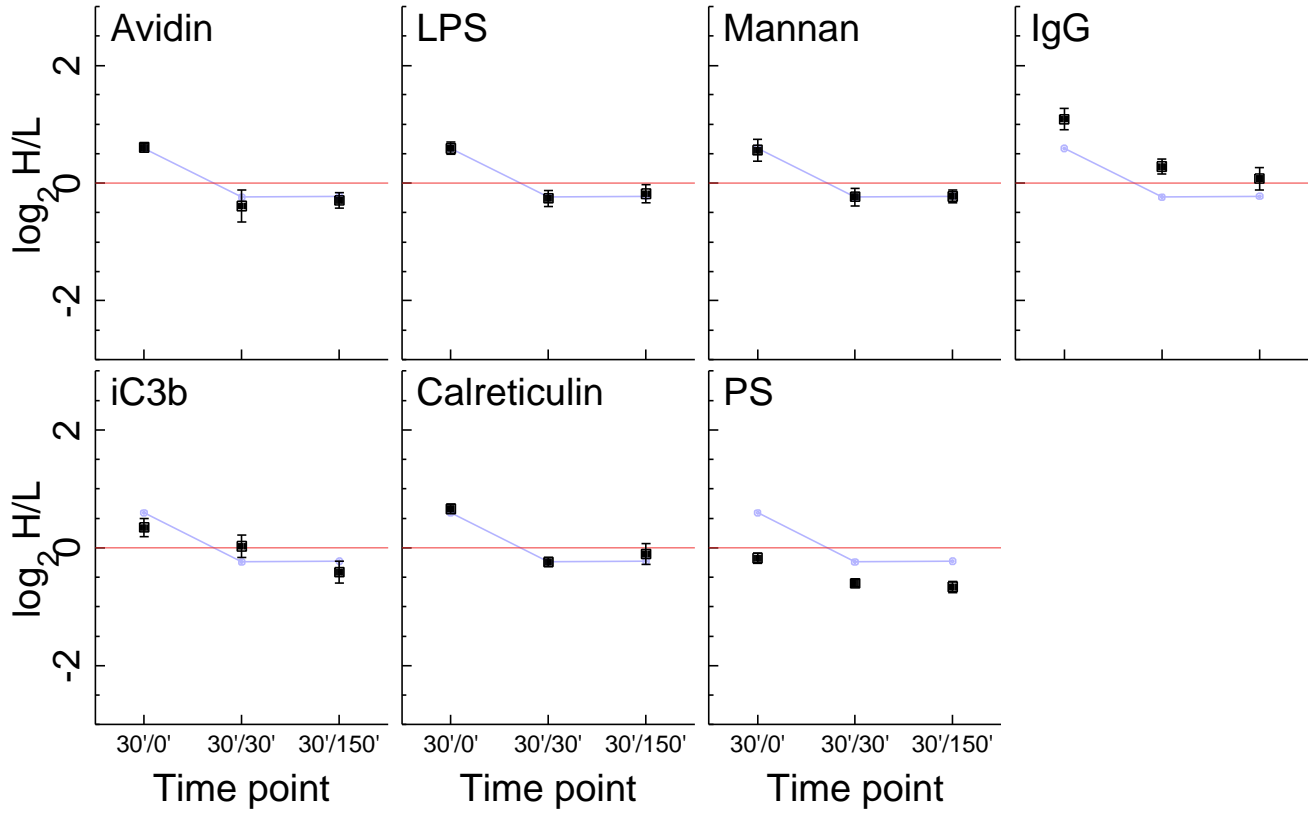

rps4x (P62702)

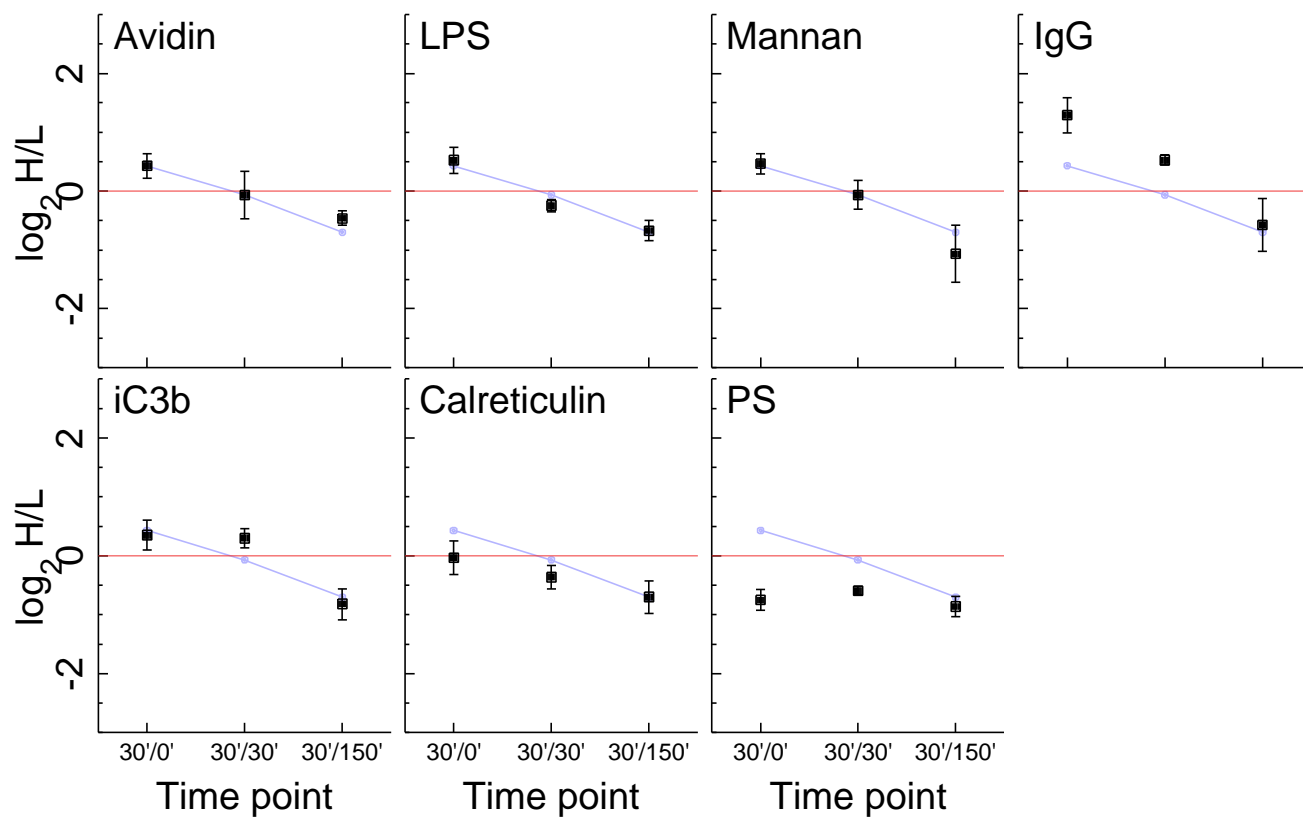

### rps5 (Q91V55)

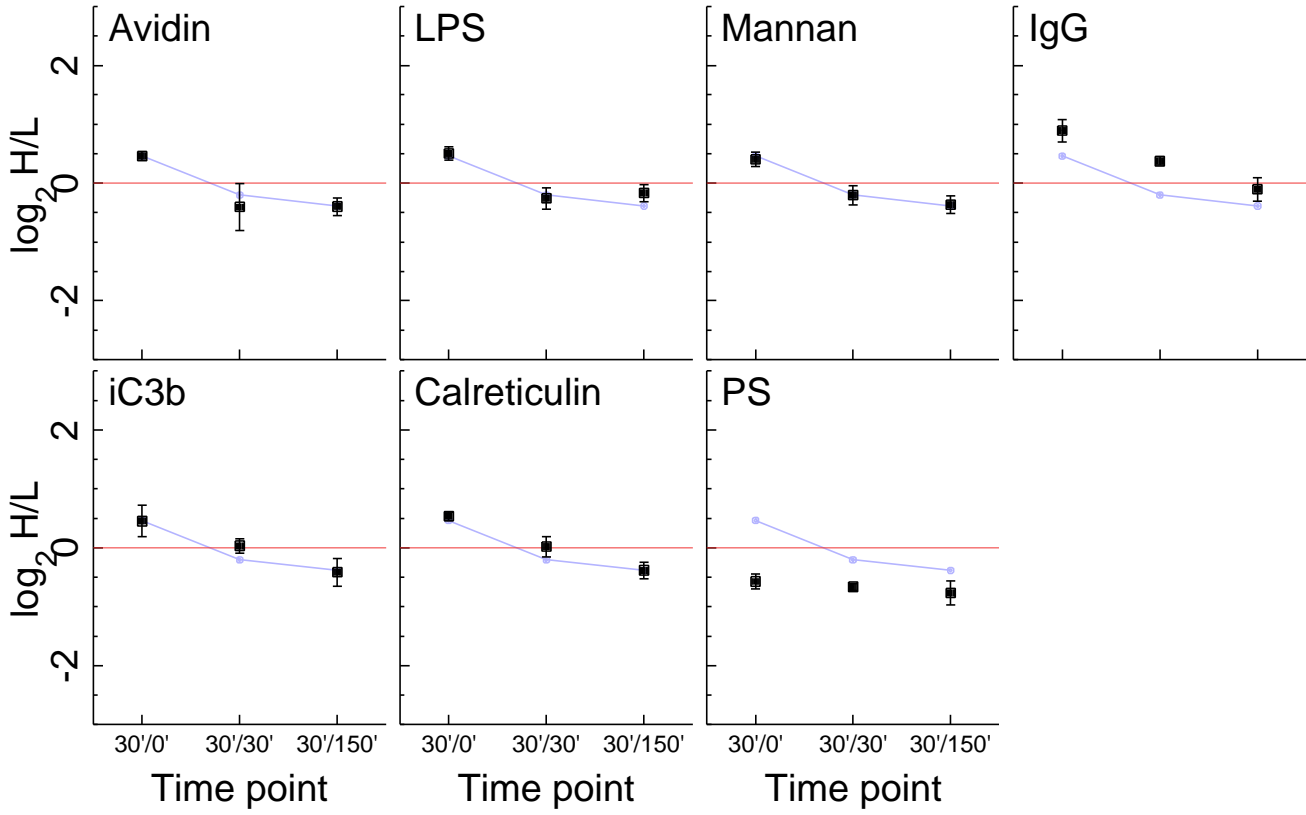



### rps6ka1 (F6Q8A4)

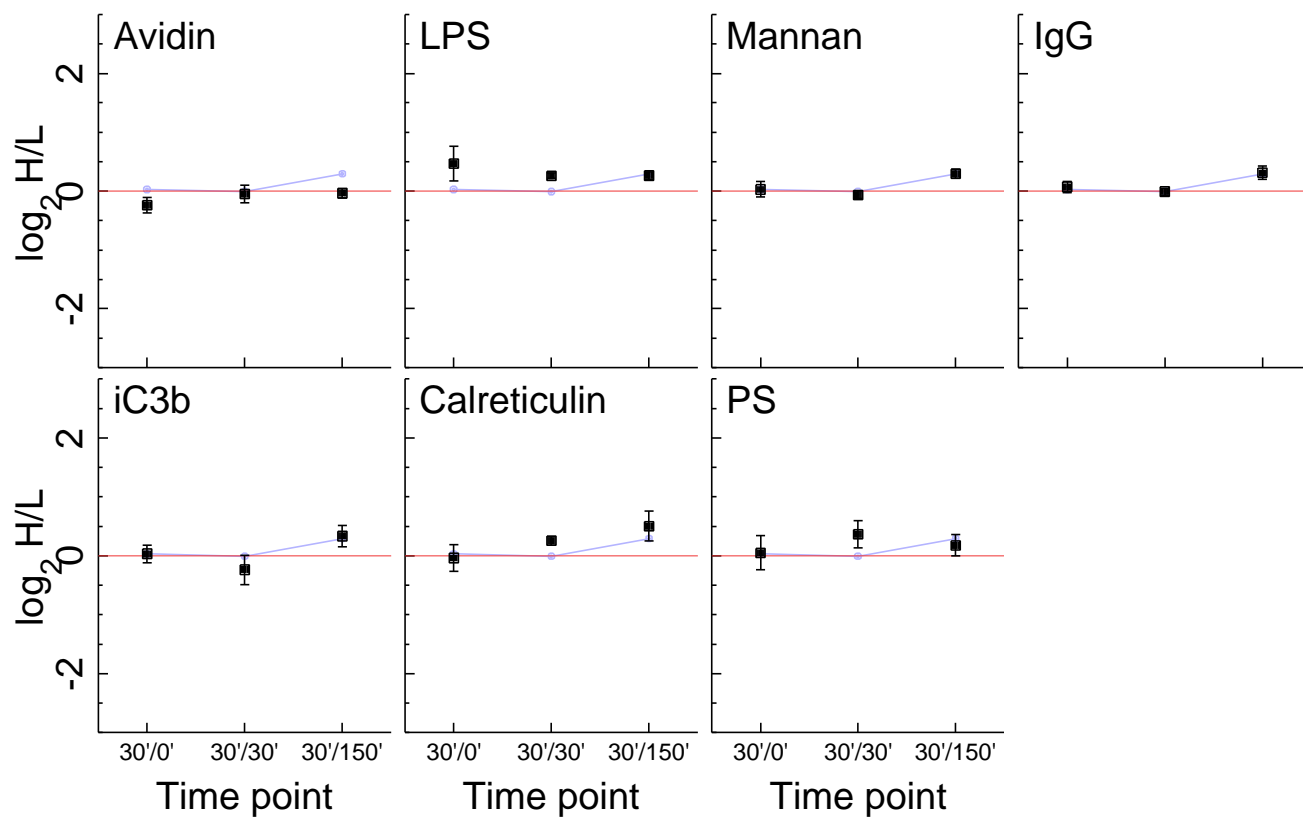

rps6 (P62754)

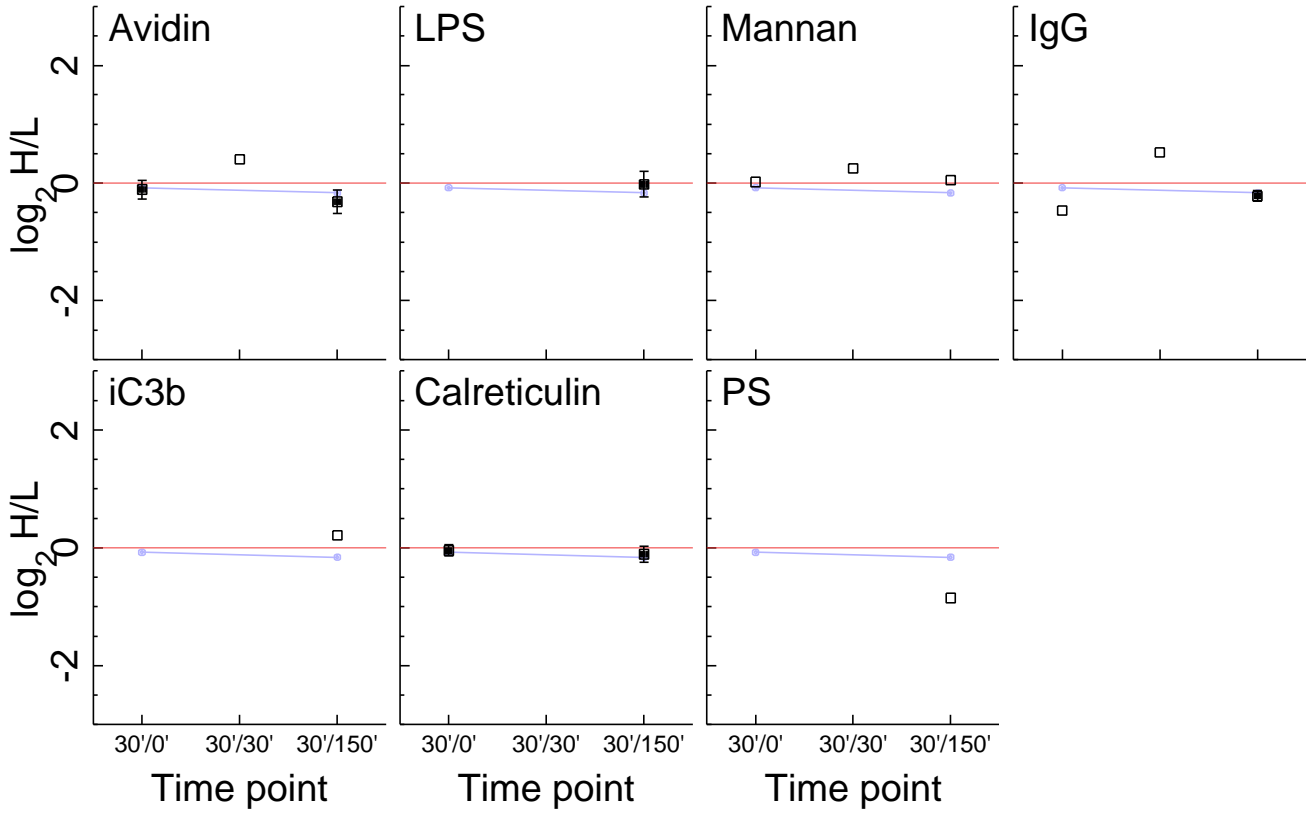

rps7 (P62082)

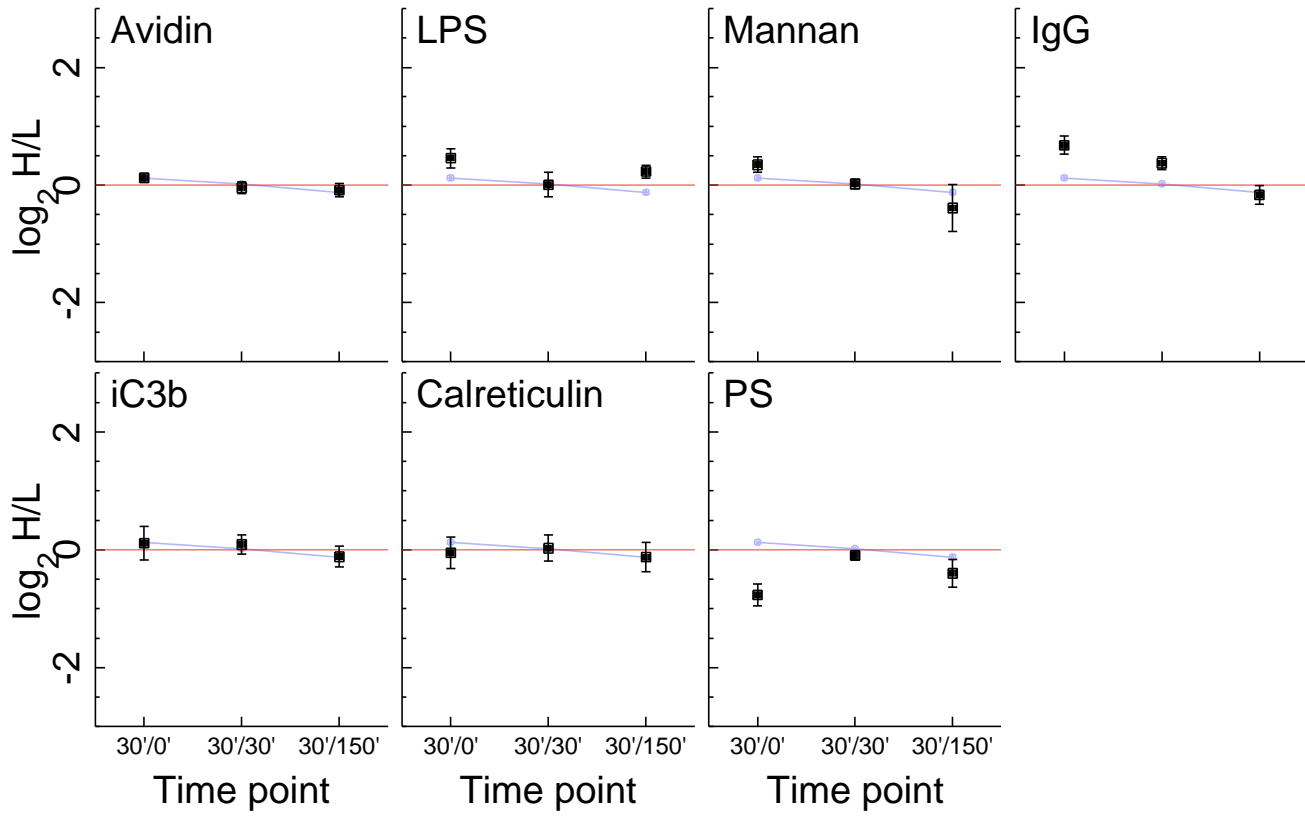

rps8 (P62242)

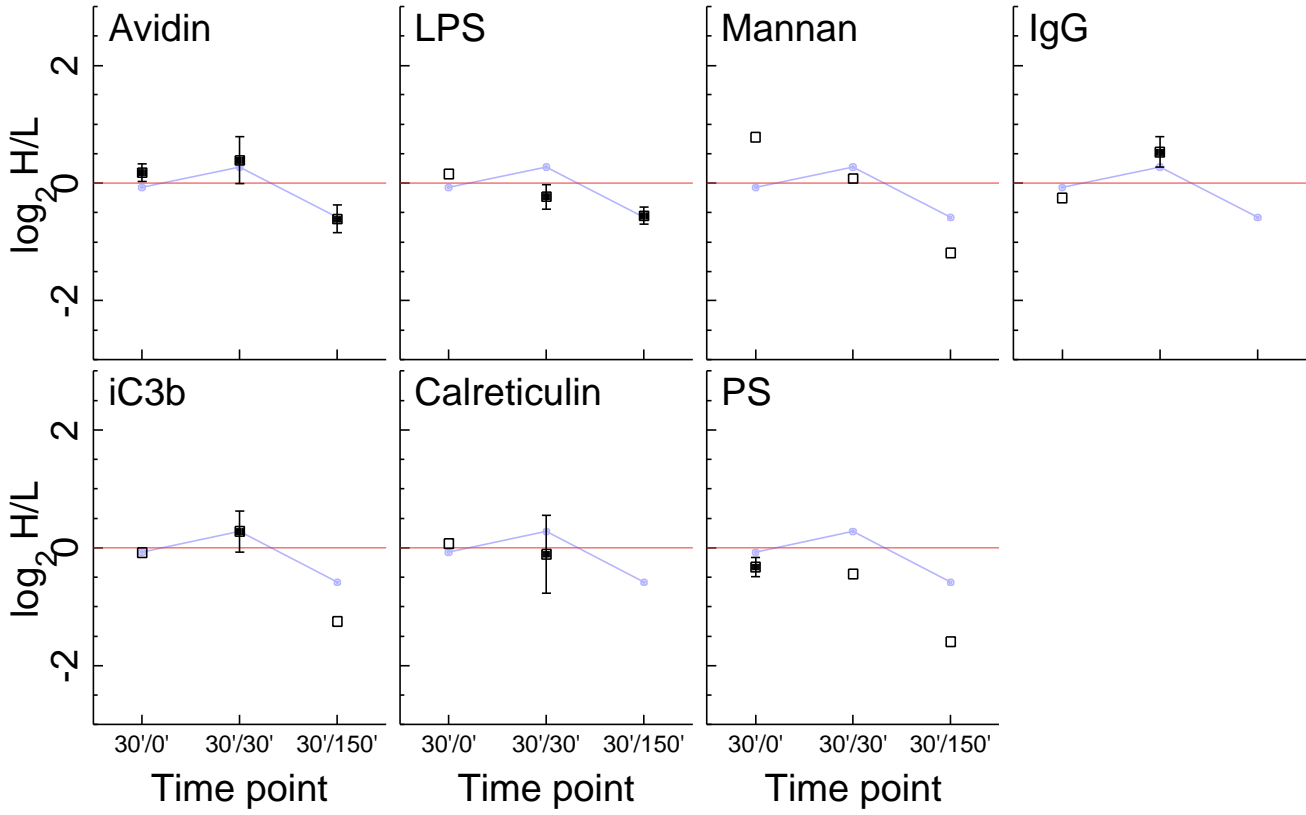

rps9 (Q6ZWN5)

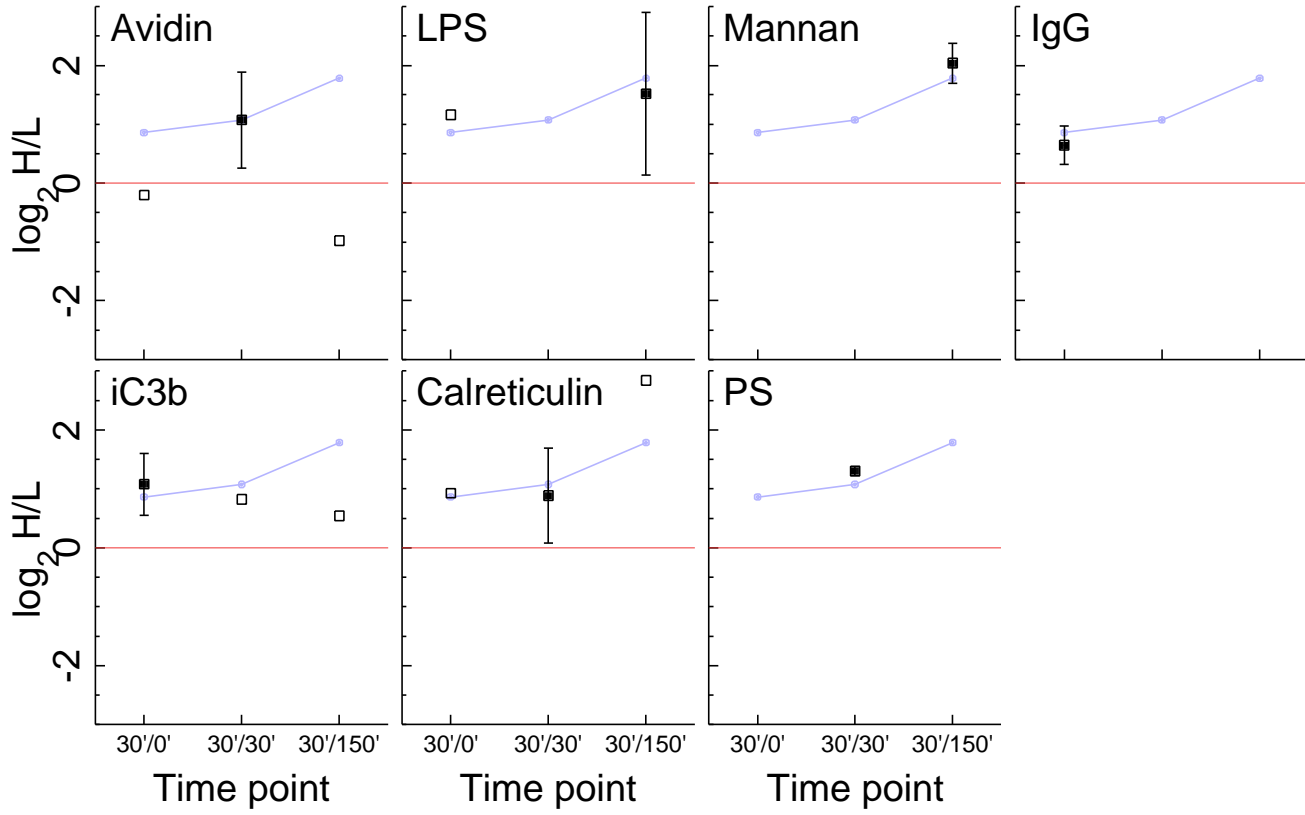

rpsa-ps10 (D3YTT7)

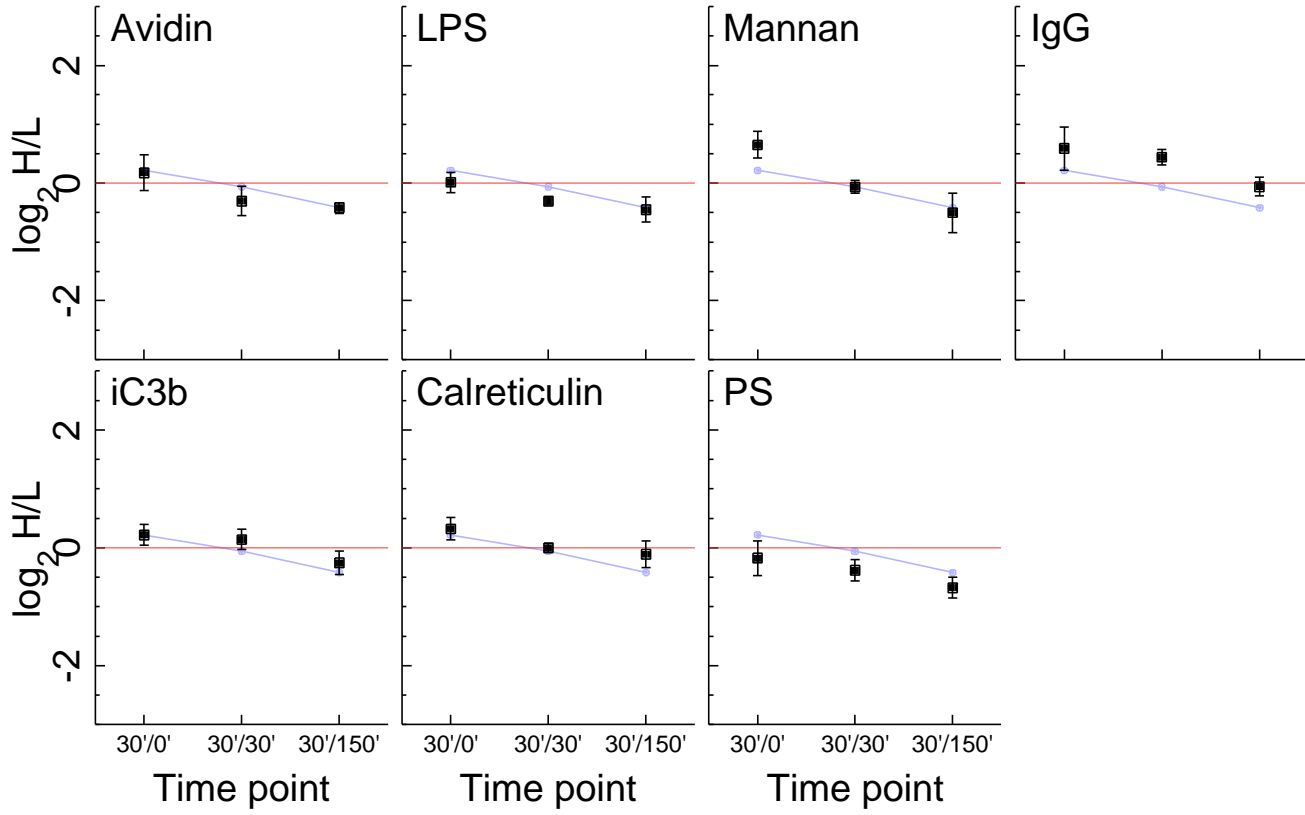

rptor (Q8K4Q0)

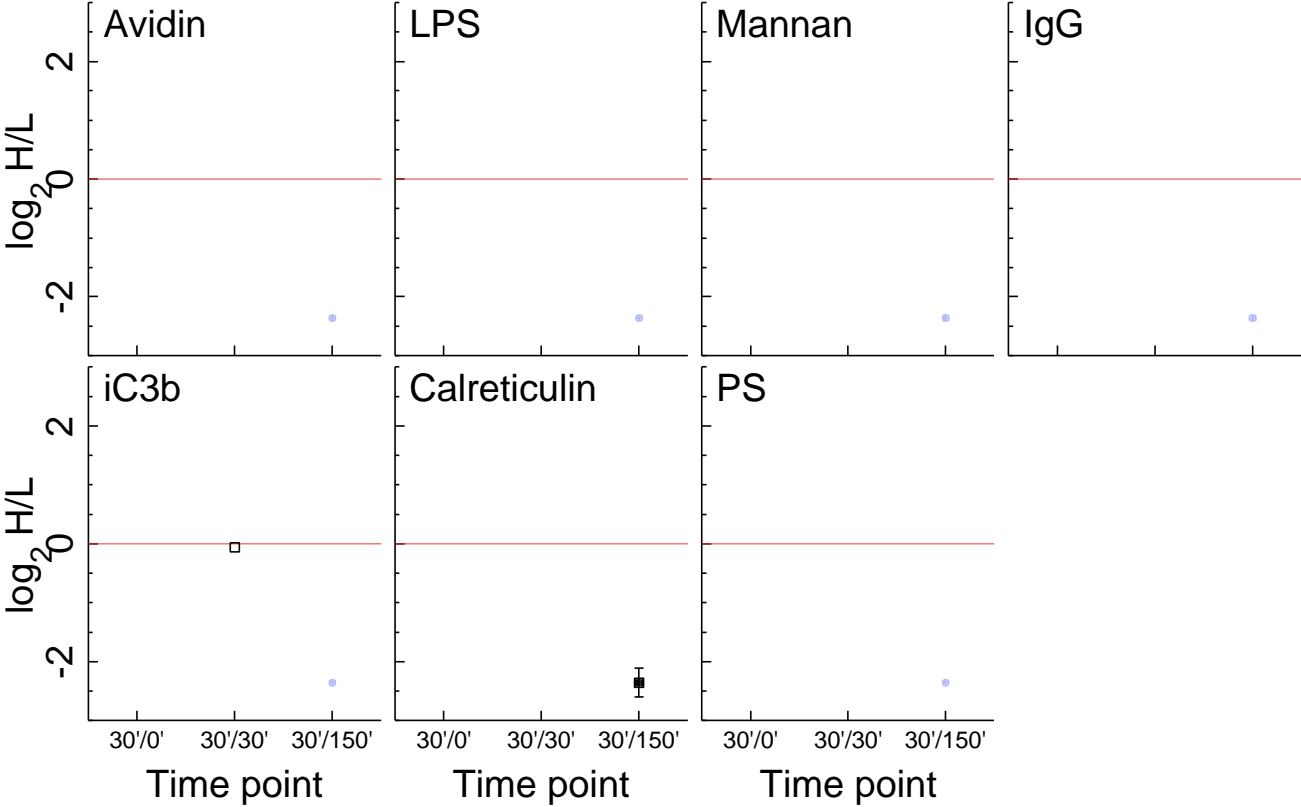

rraga (Q80X95)

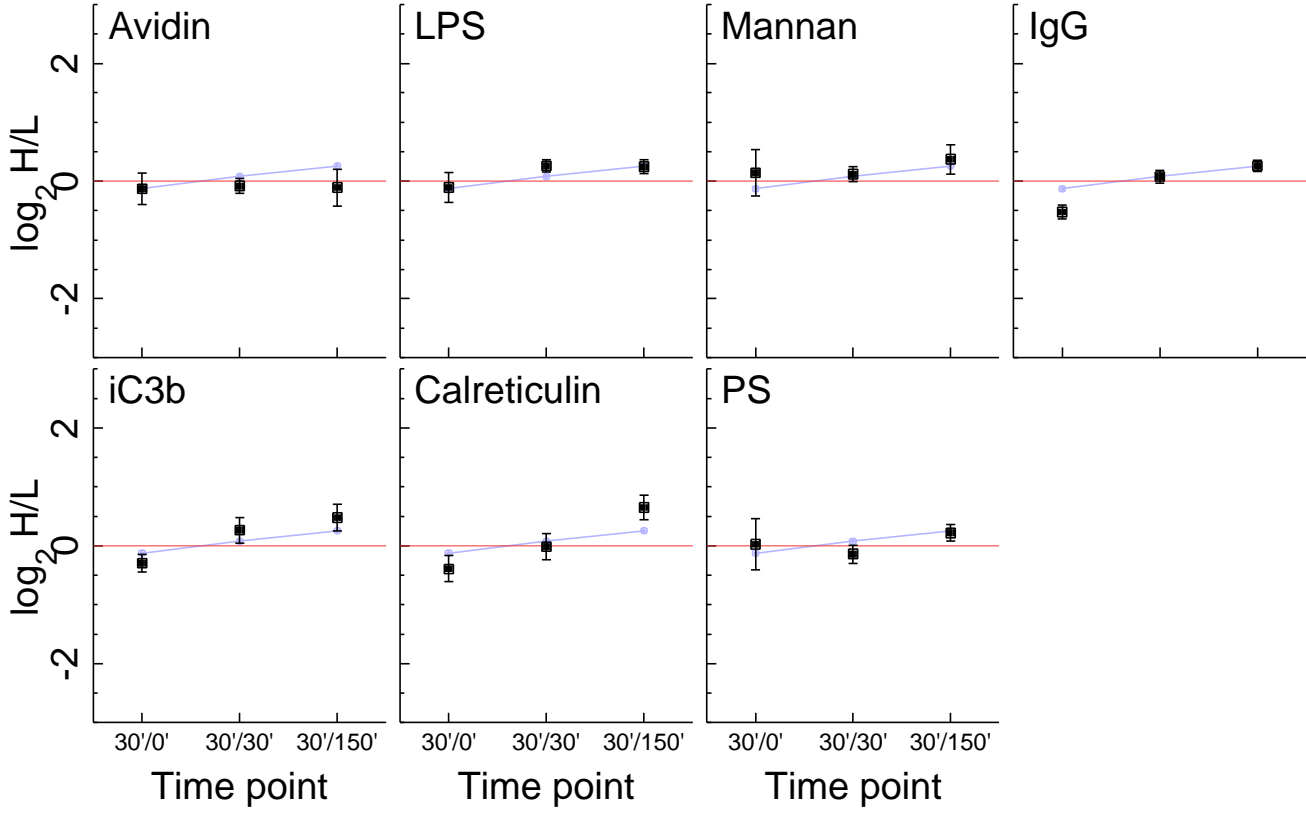



rragc (Q99K70)

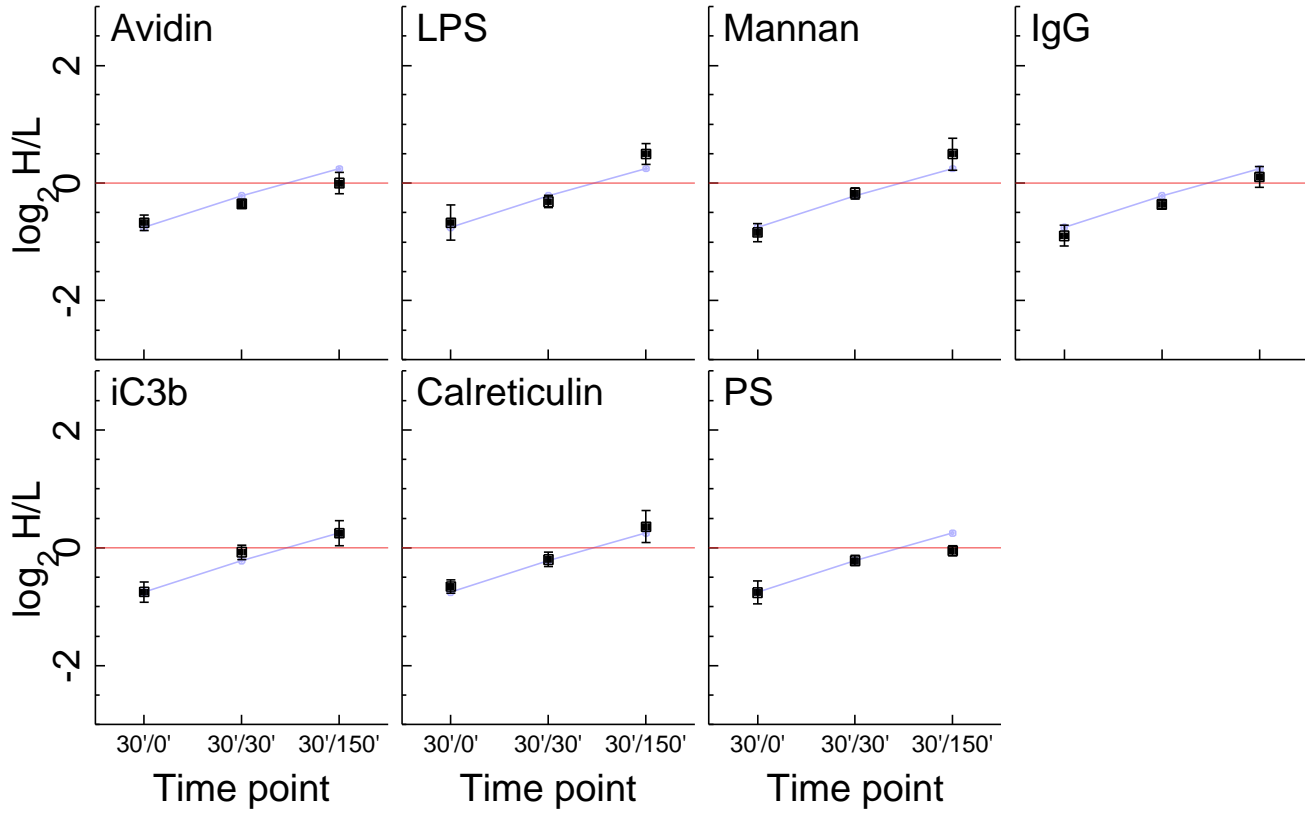

rras (P10833)

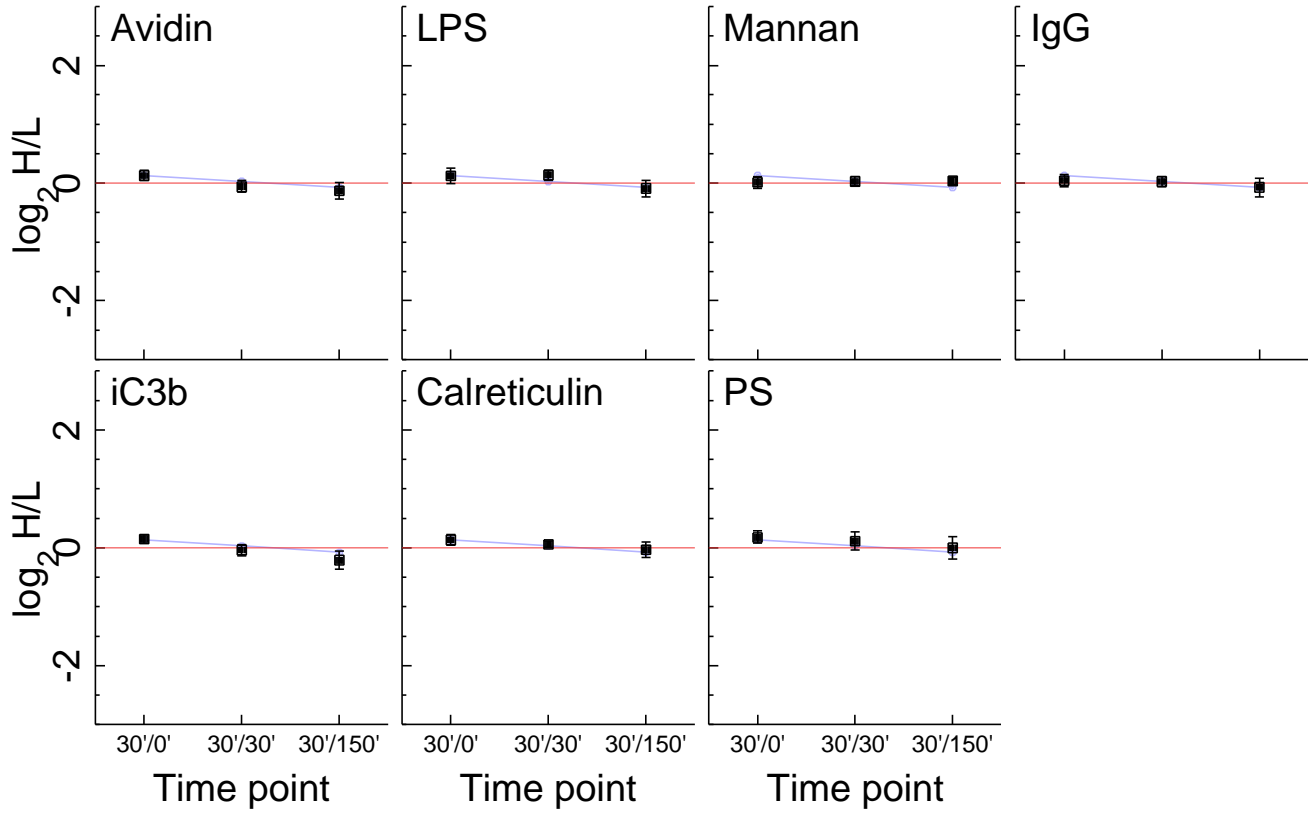

rrbp1 (Q99PL5)

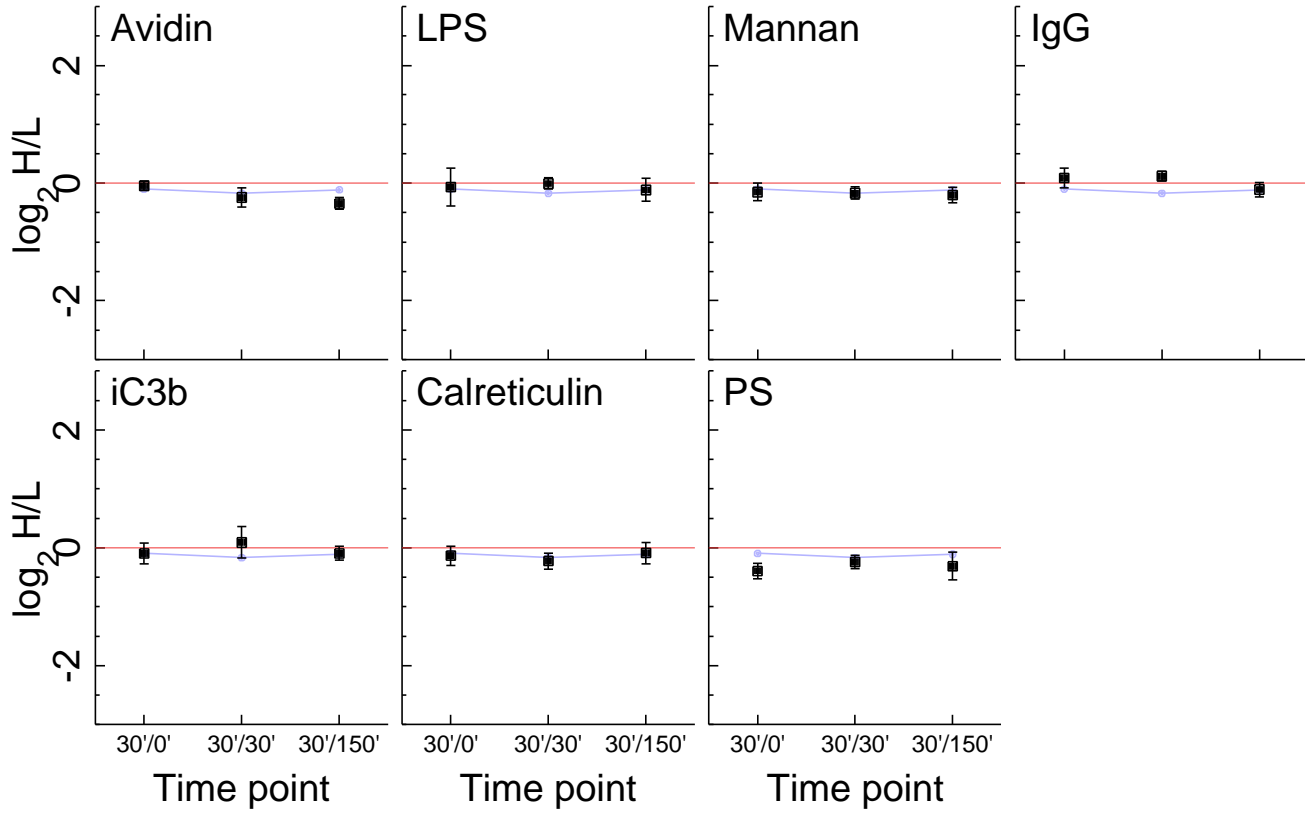

rsad2 (Q8CBB9)

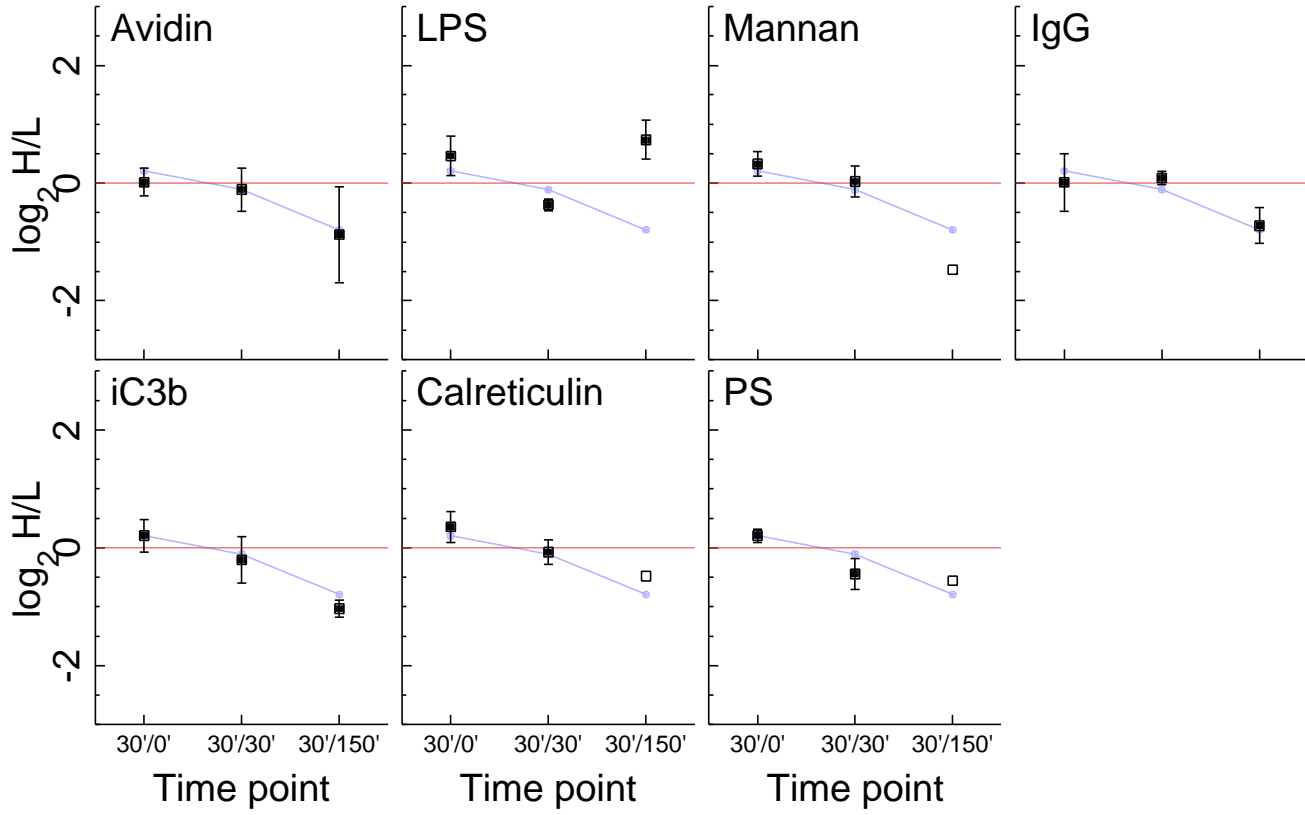

rsu1 (Q01730)

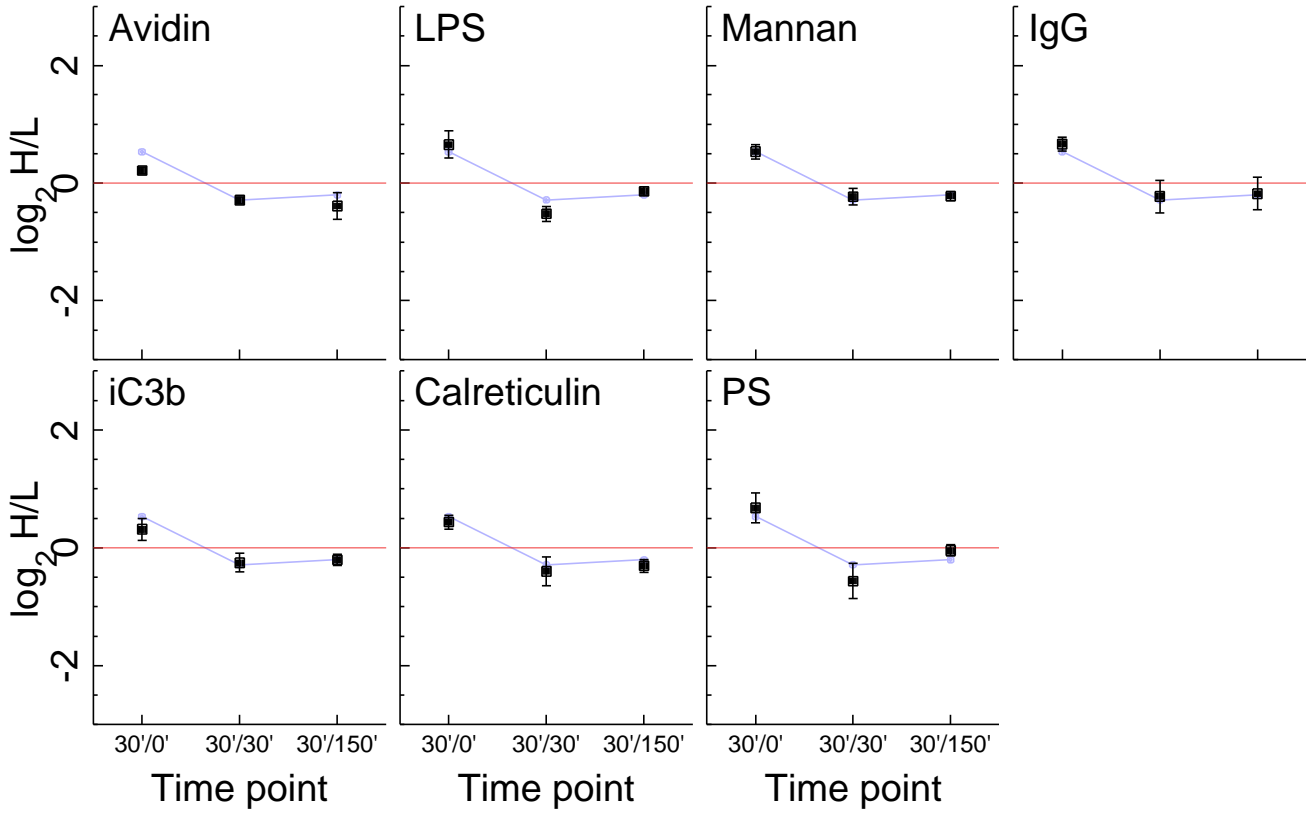

### rtn1 (Q8K0T0)

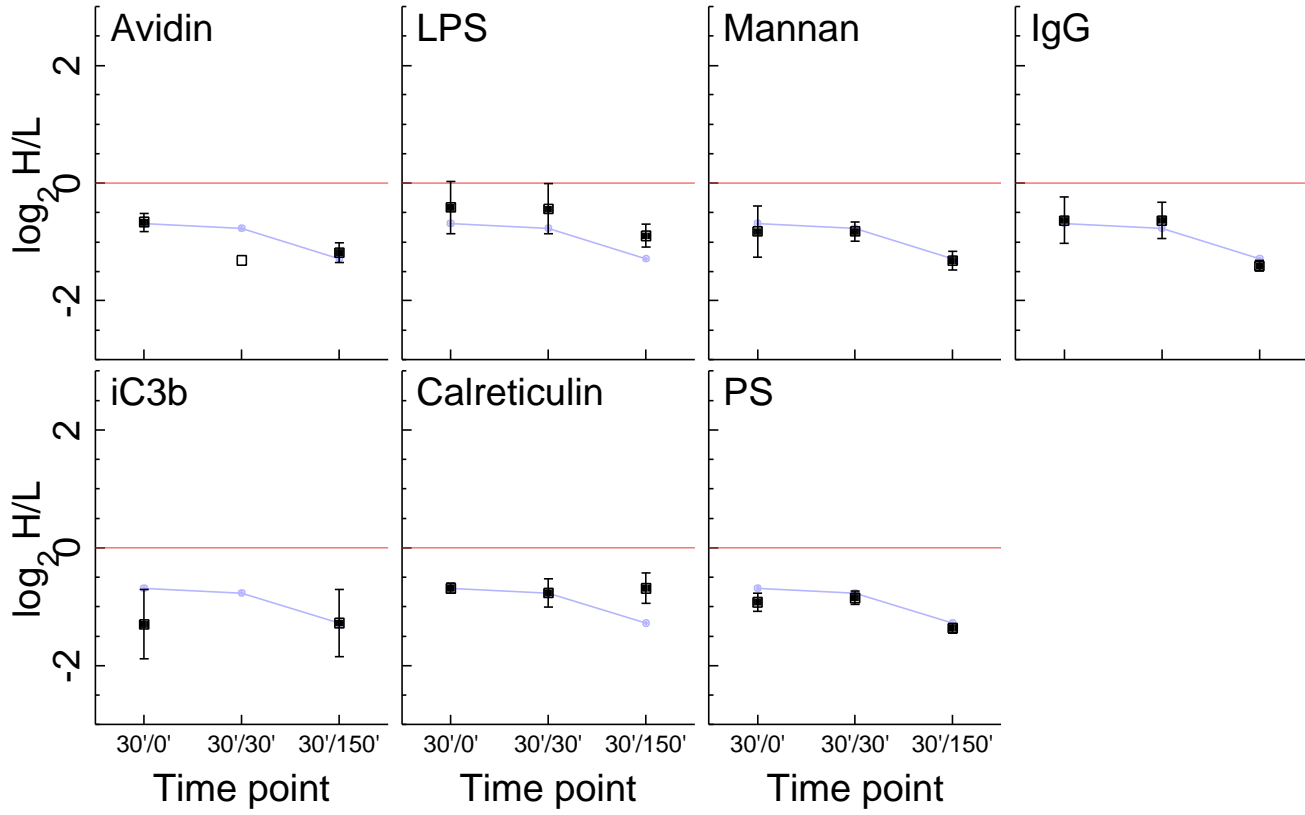

rtn4:1 (Q8BH78)

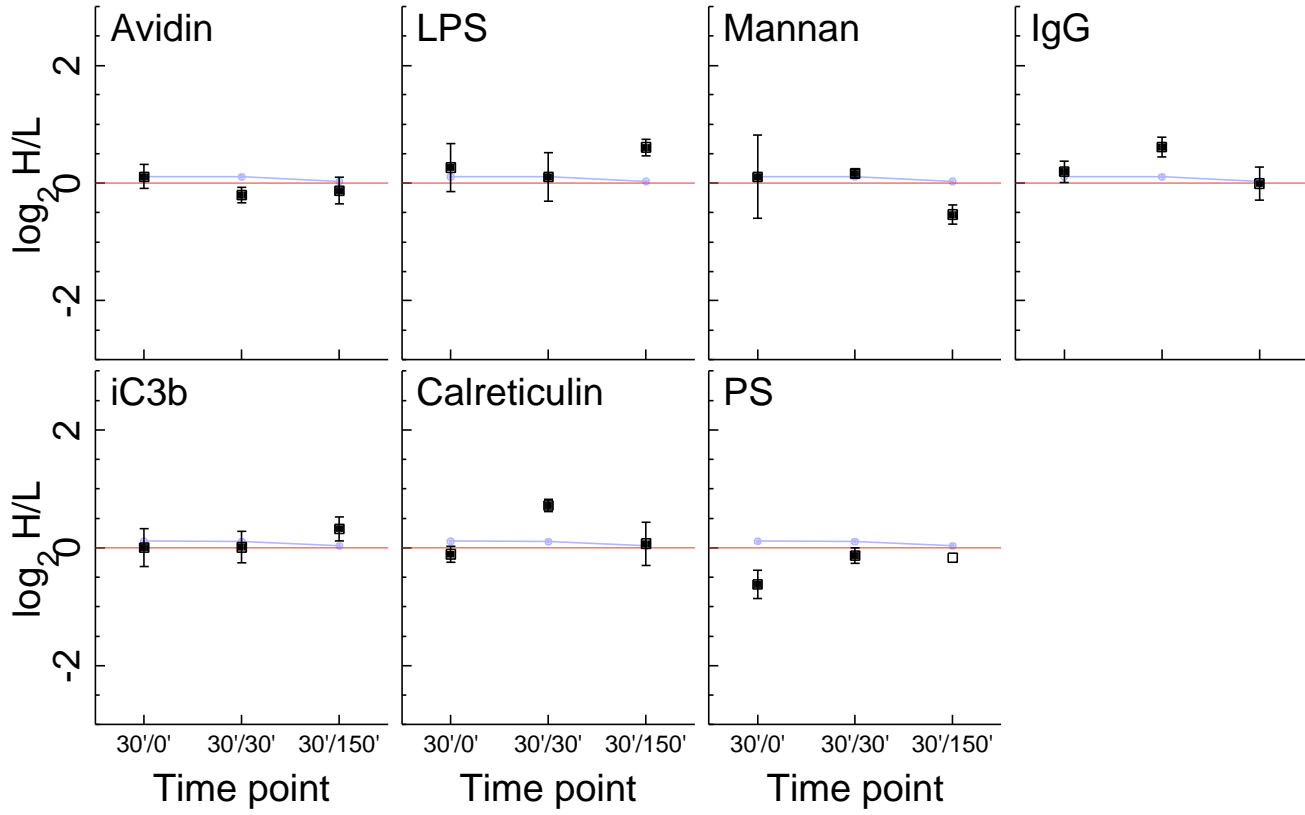

rtn4:2 (Q99P72)

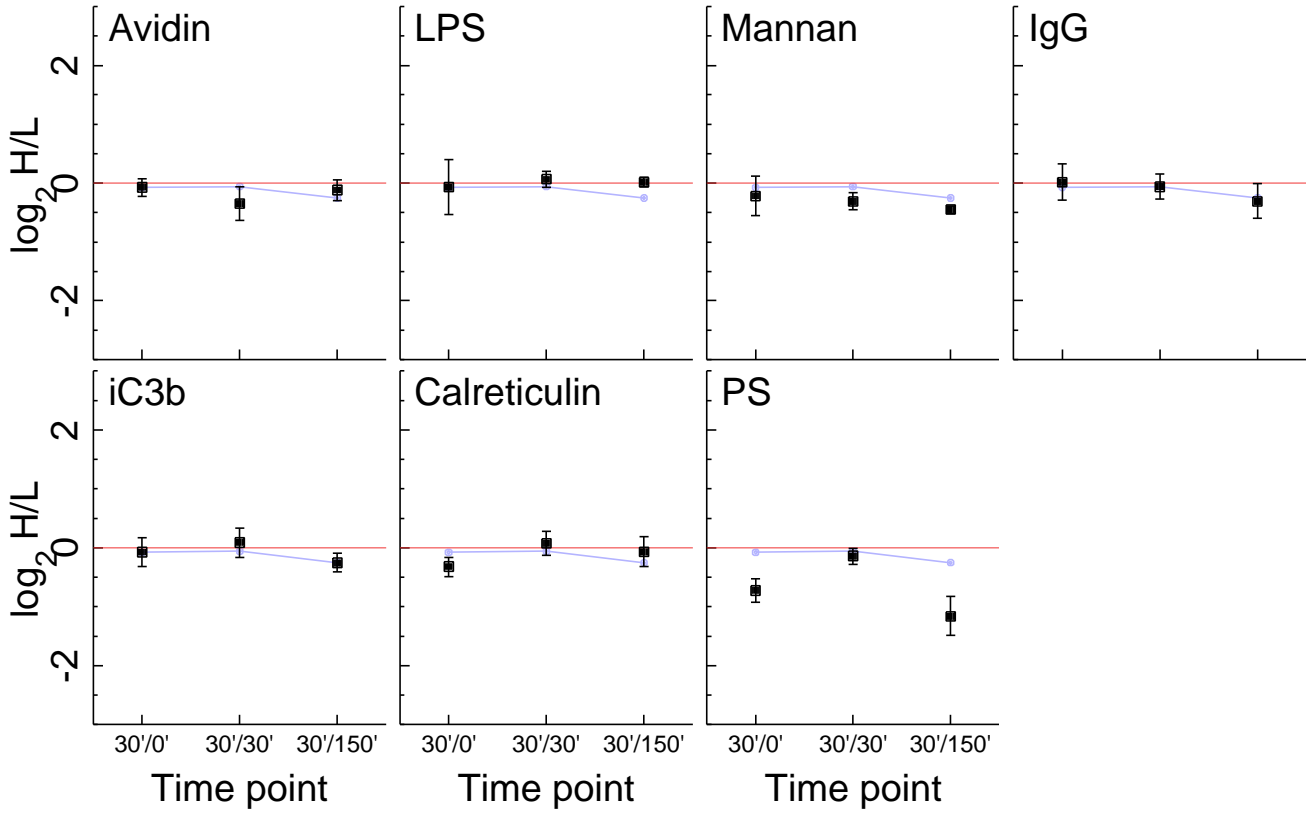



rufy1 (Q8BIJ7)

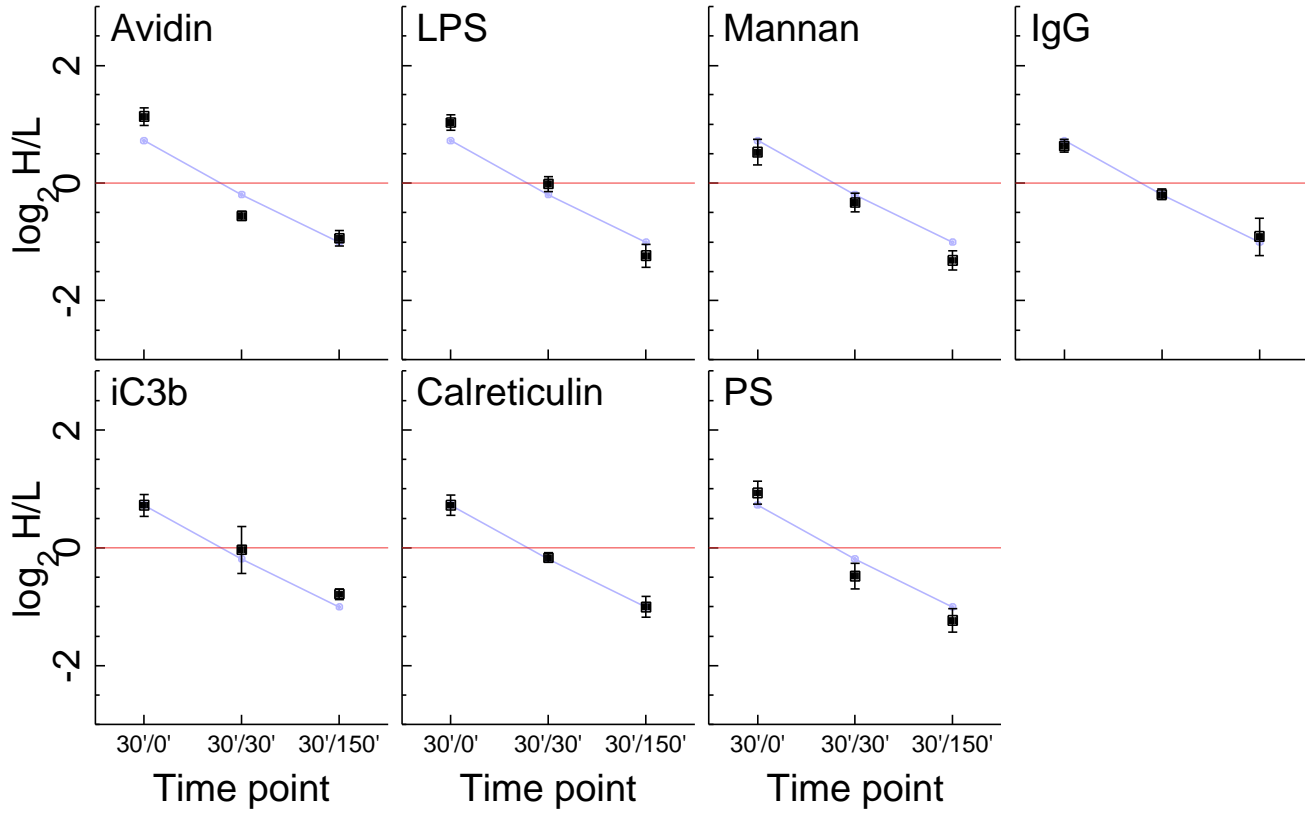

rufy2 (Q8R4C2)

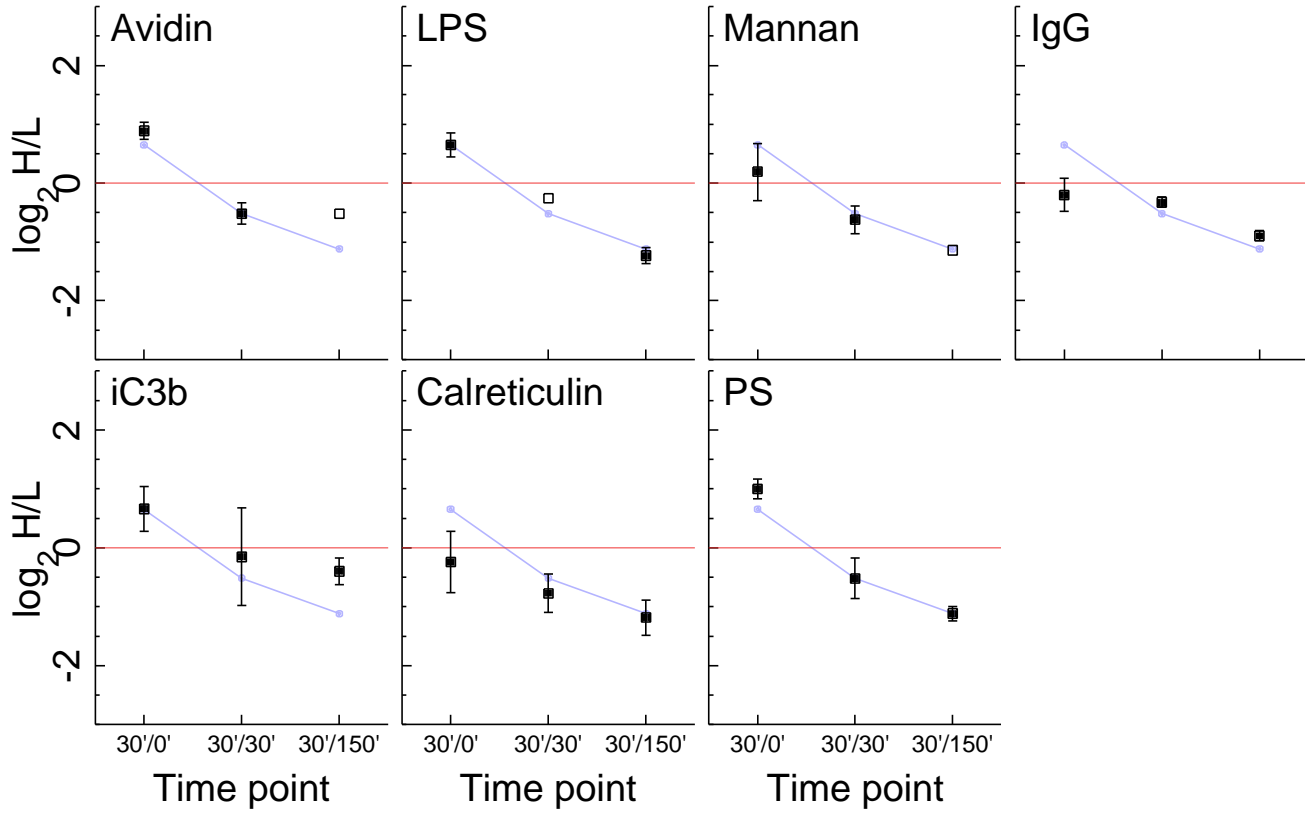

ruvb1 (P60122)

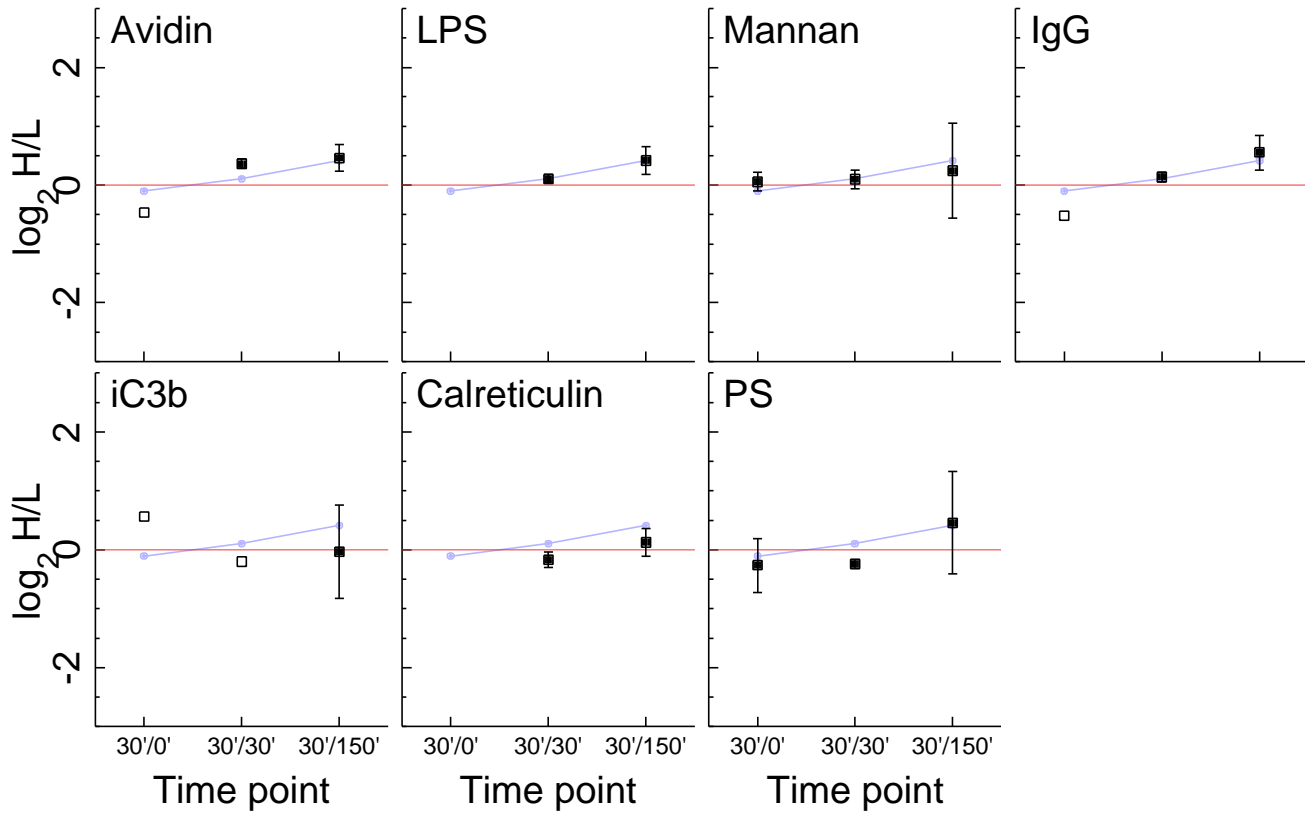

### s100a10 (P08207)

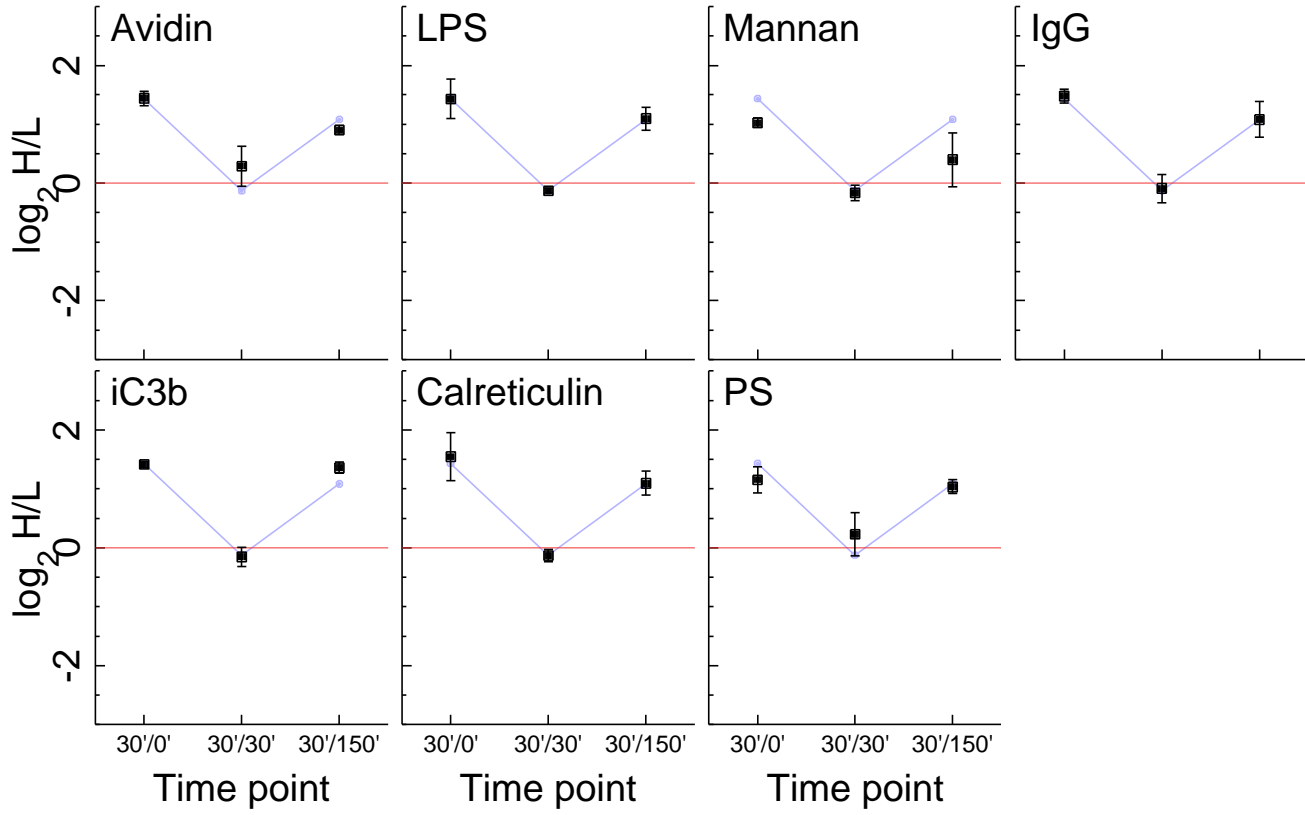

### s100a11 (P50543)

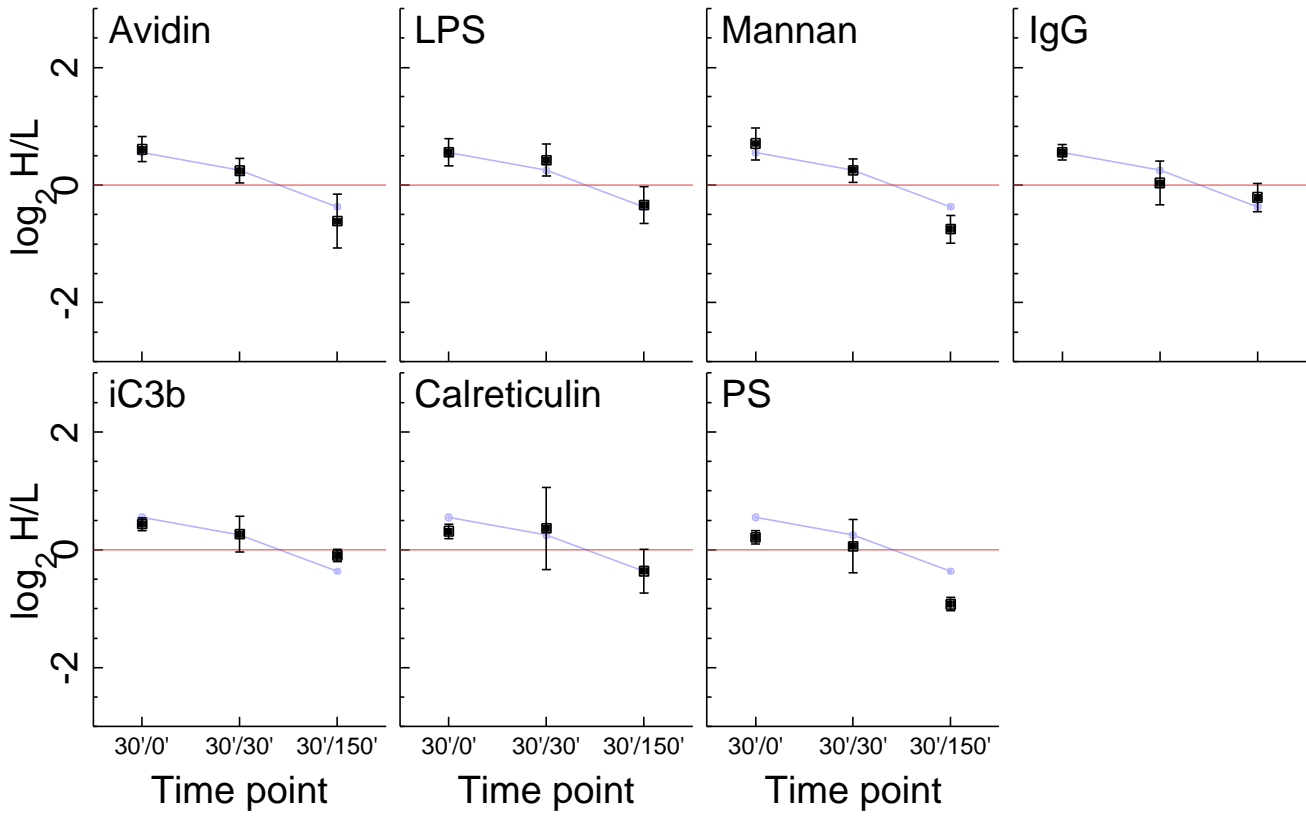

### s100a13 (P97352)

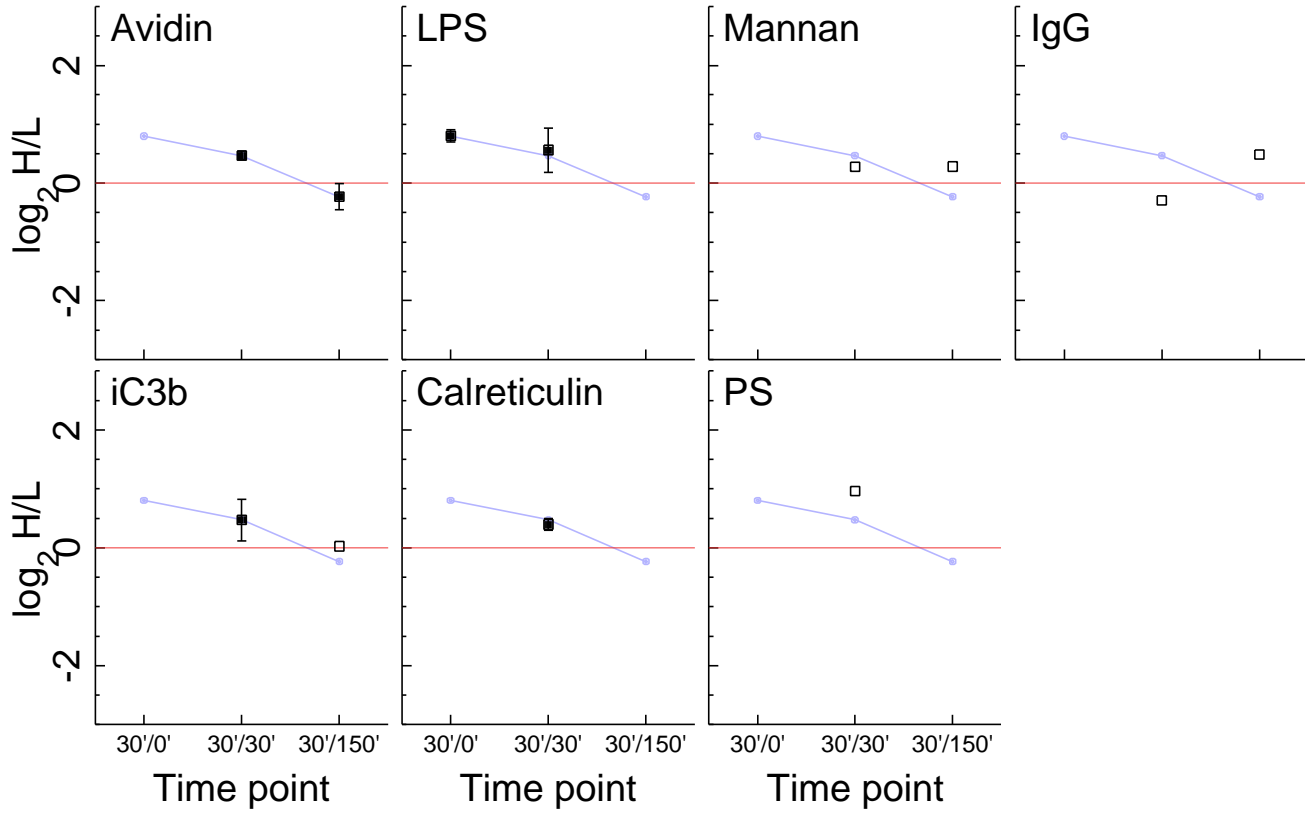

### s100a4 (P07091)

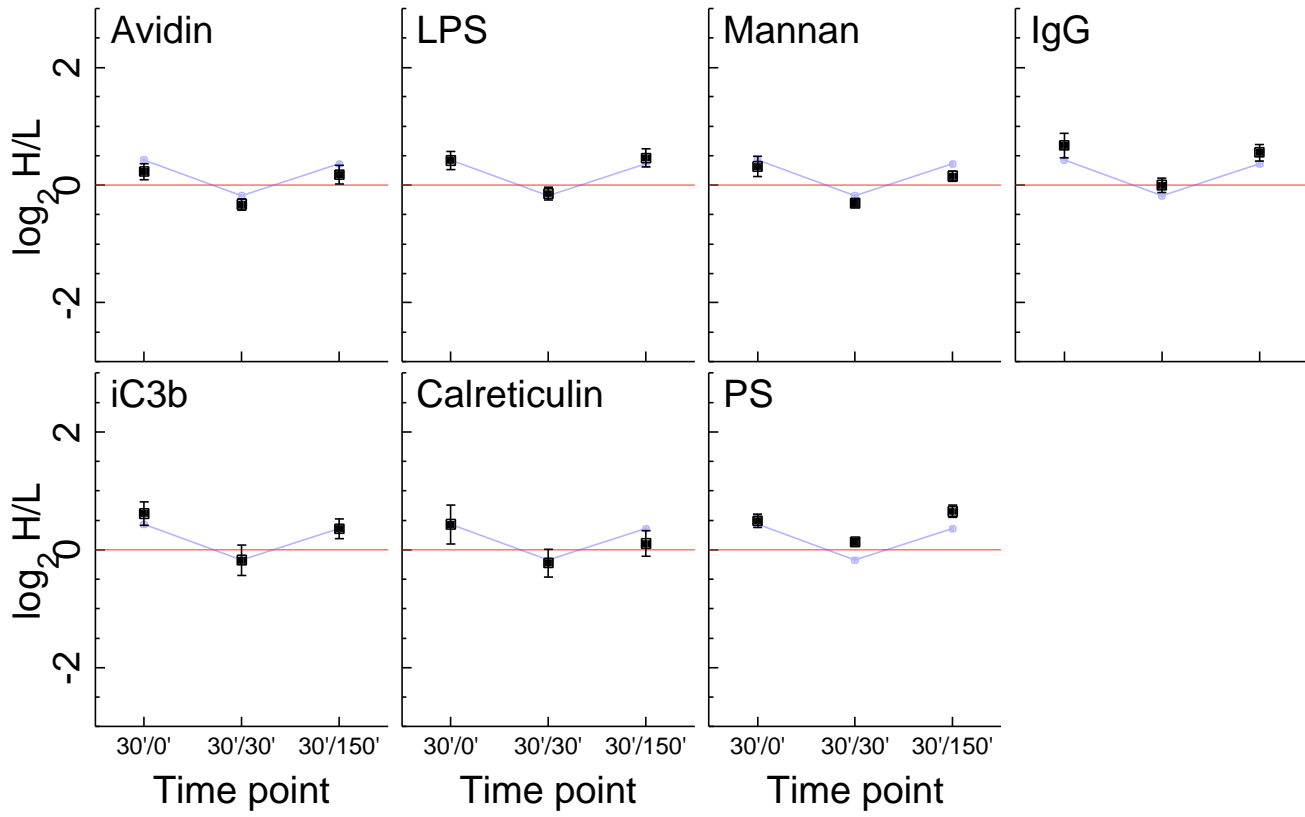

s100a6 (P14069)

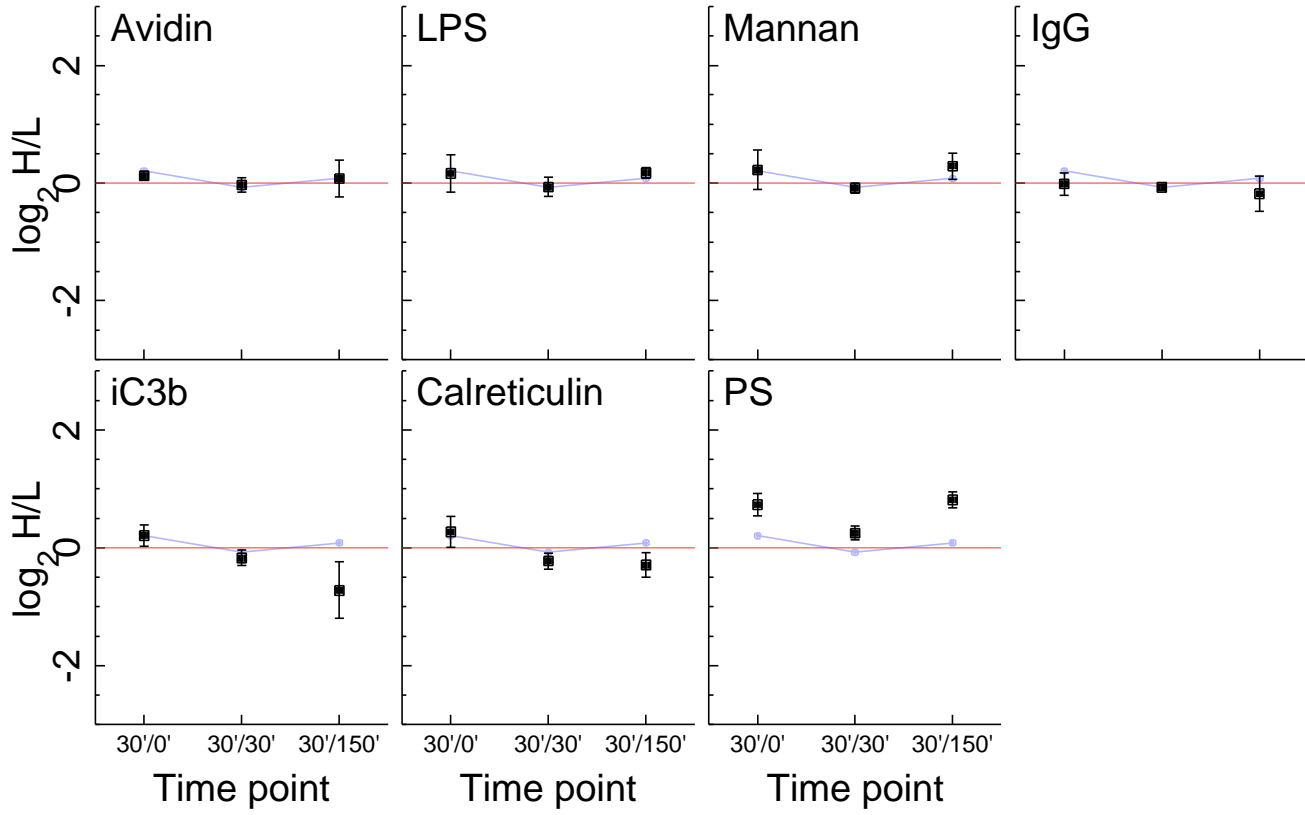



saa3 (P04918)

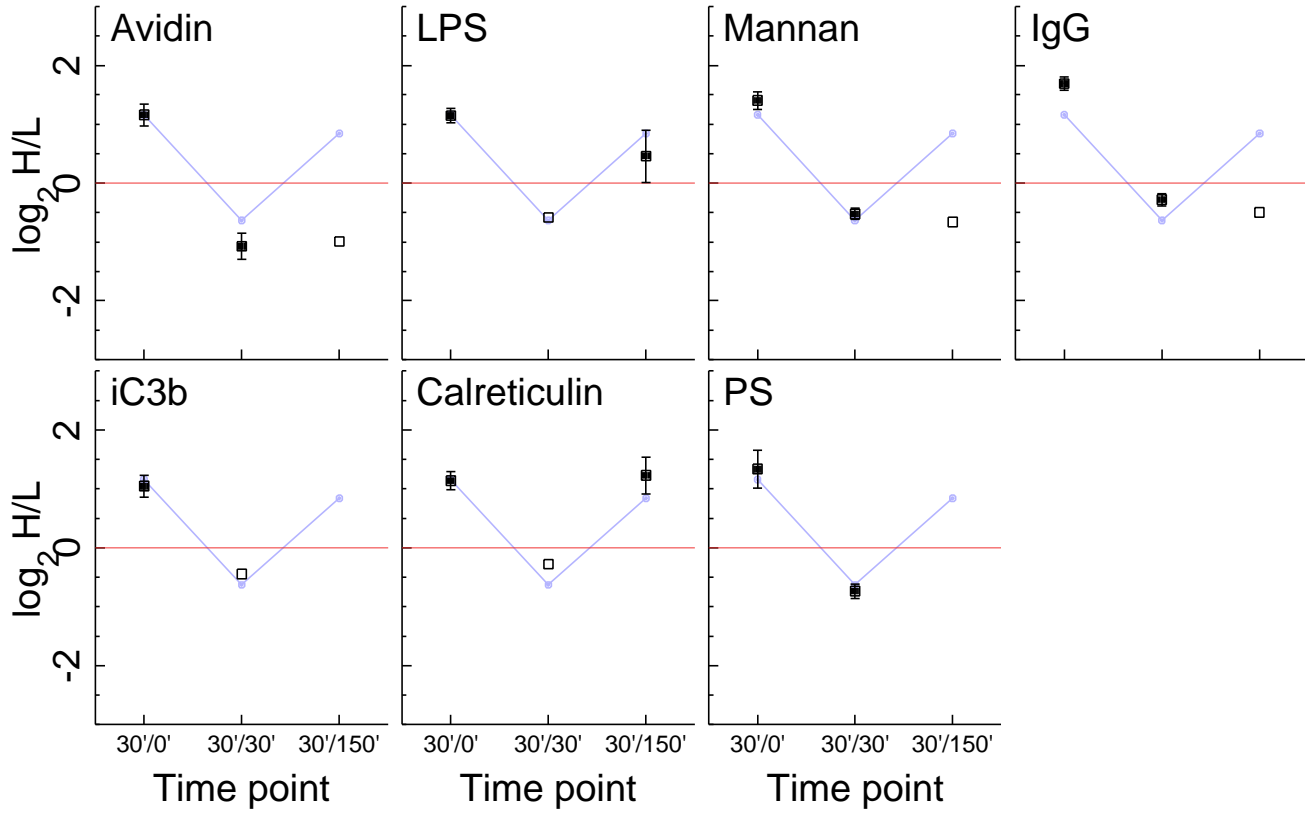

### sacm1l (Q9EP69)

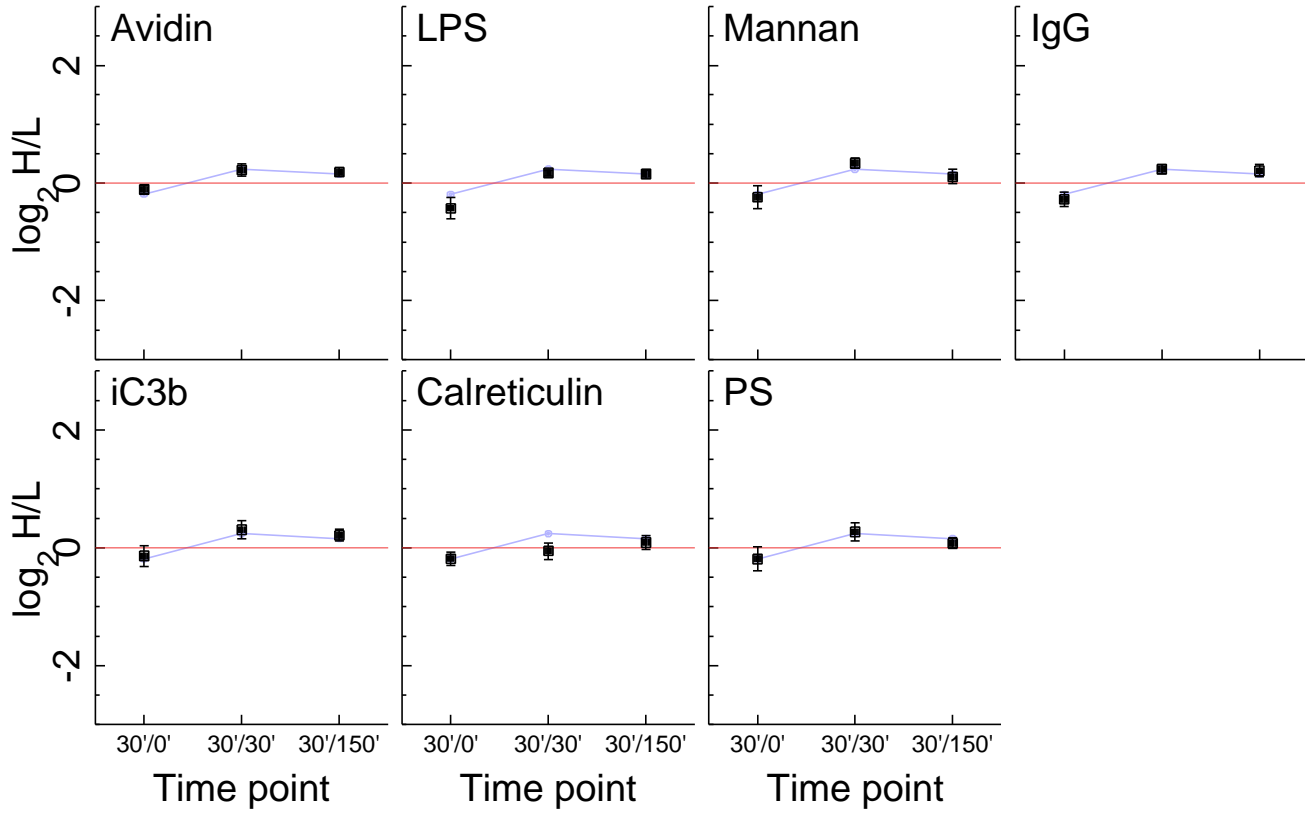

### samm50 (Q8BGH2)

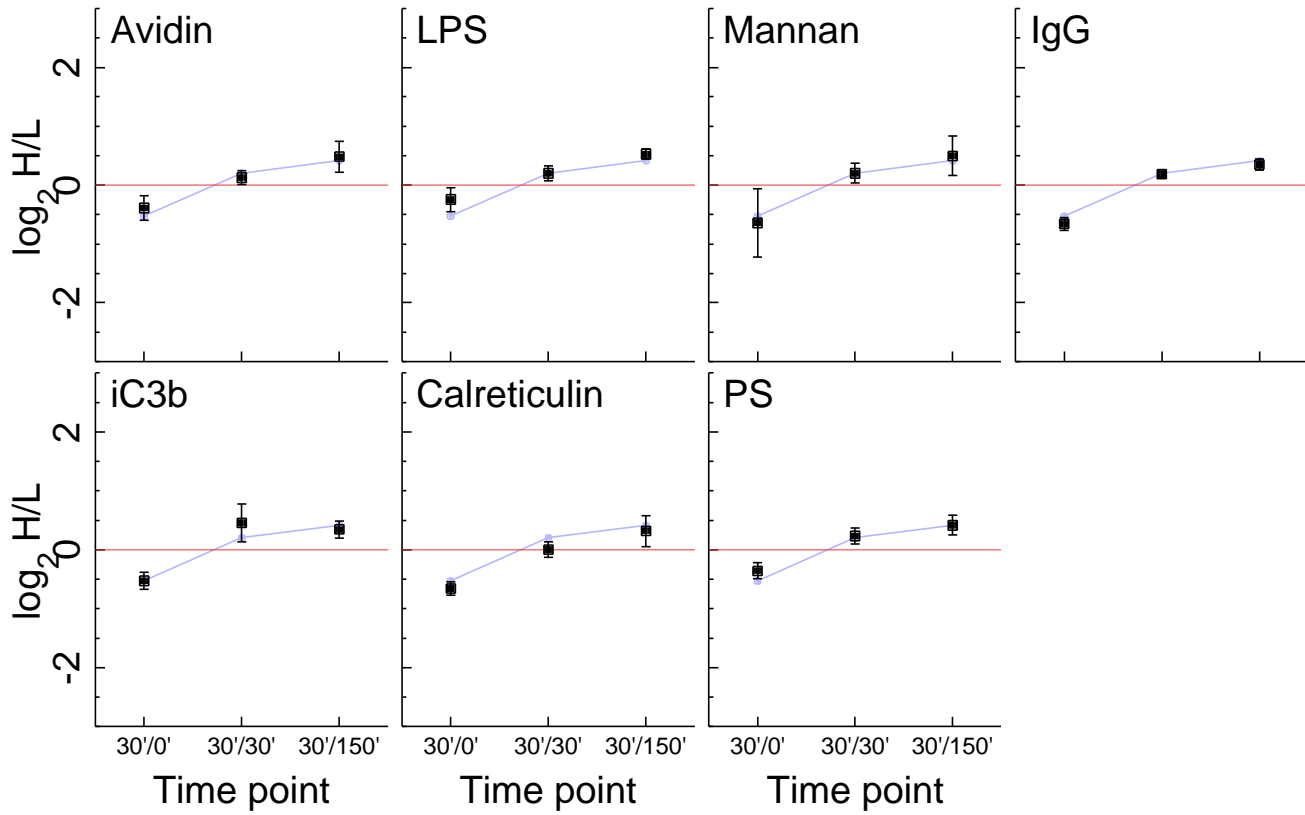

sar1a (Q99JZ4)

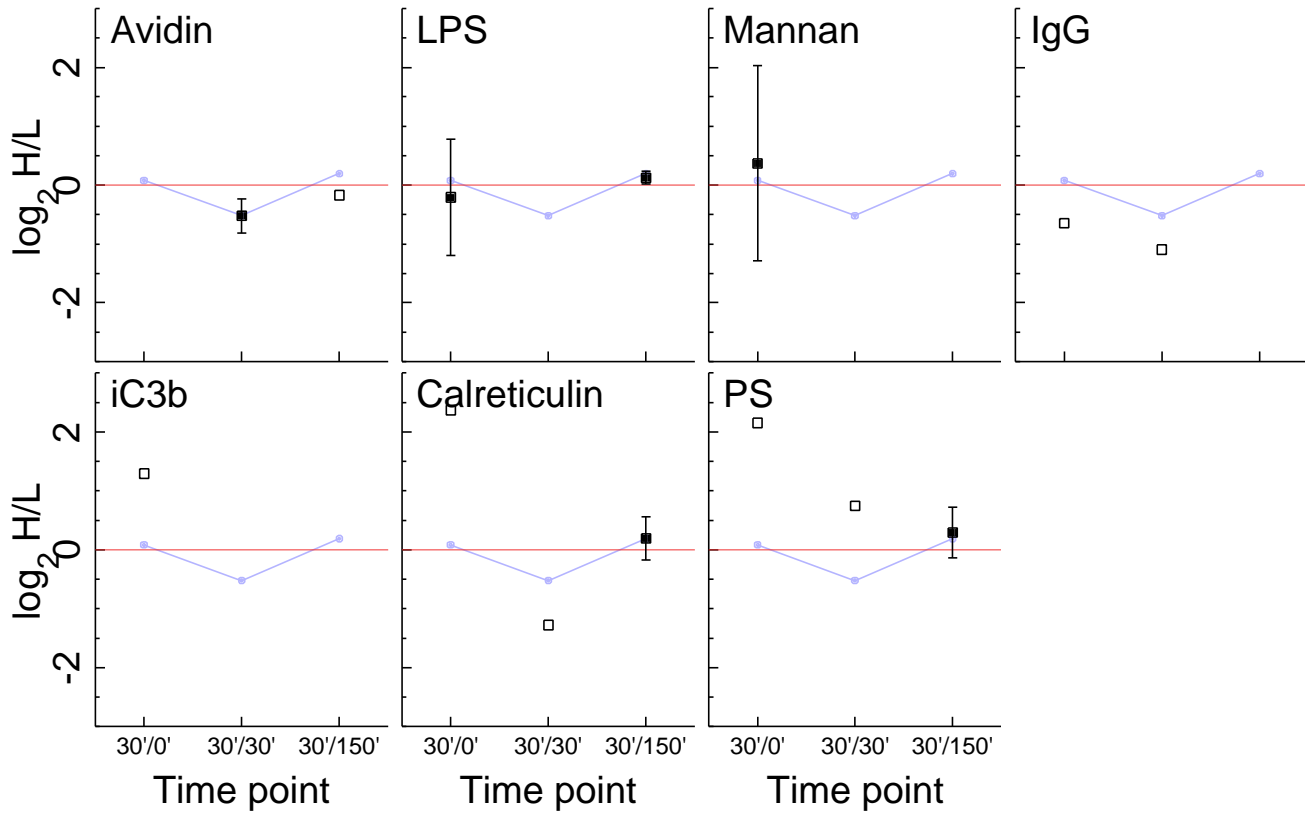

sarnp (Q9D1J3)

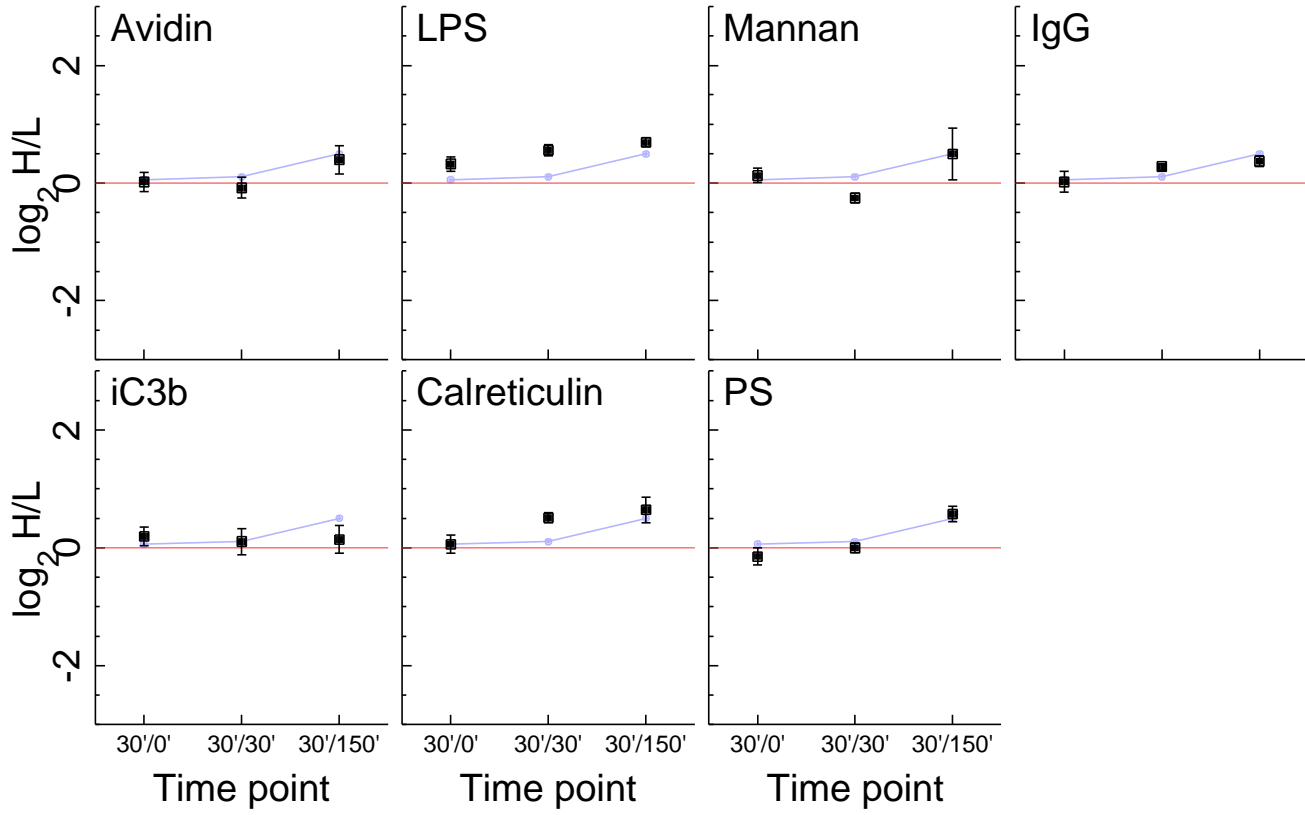

### sash3 (Q8K352)

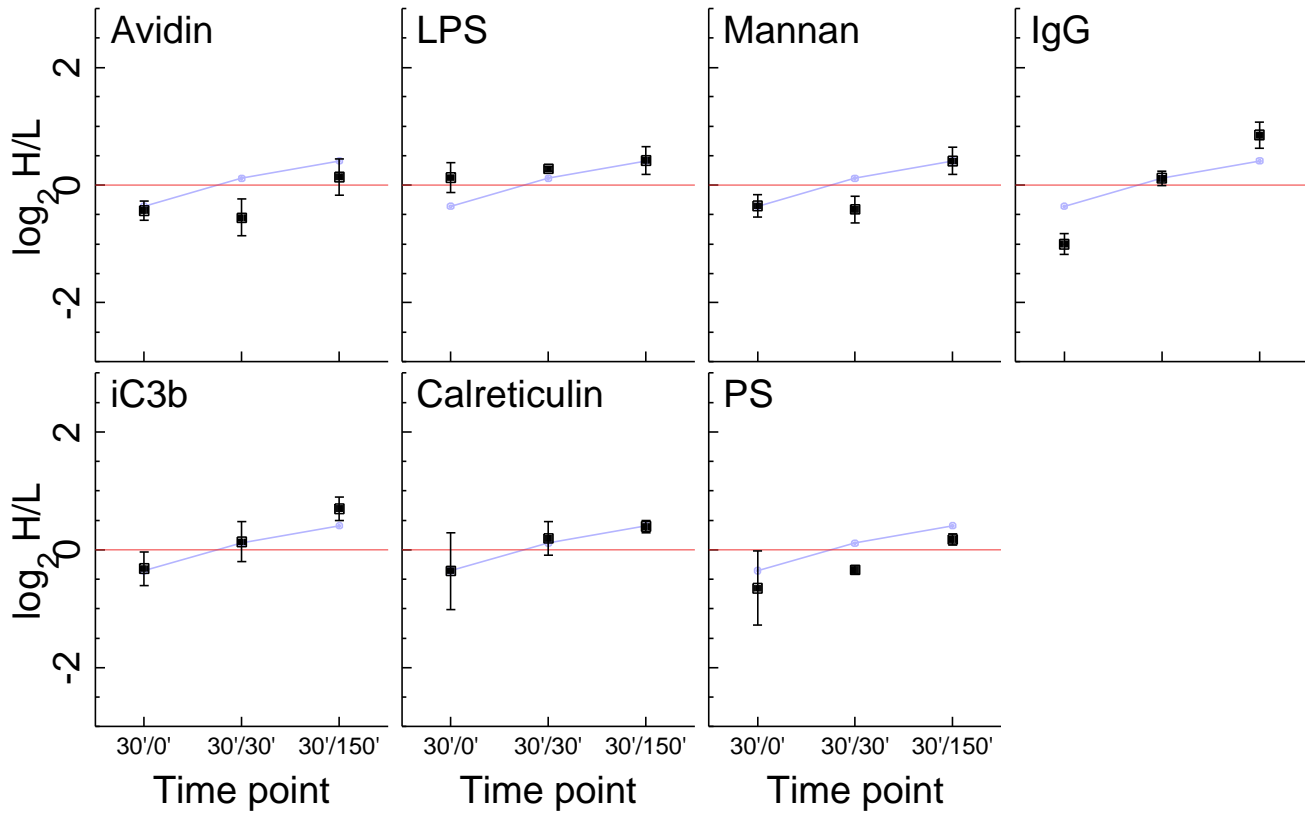

### scamp1 (Q8K021)

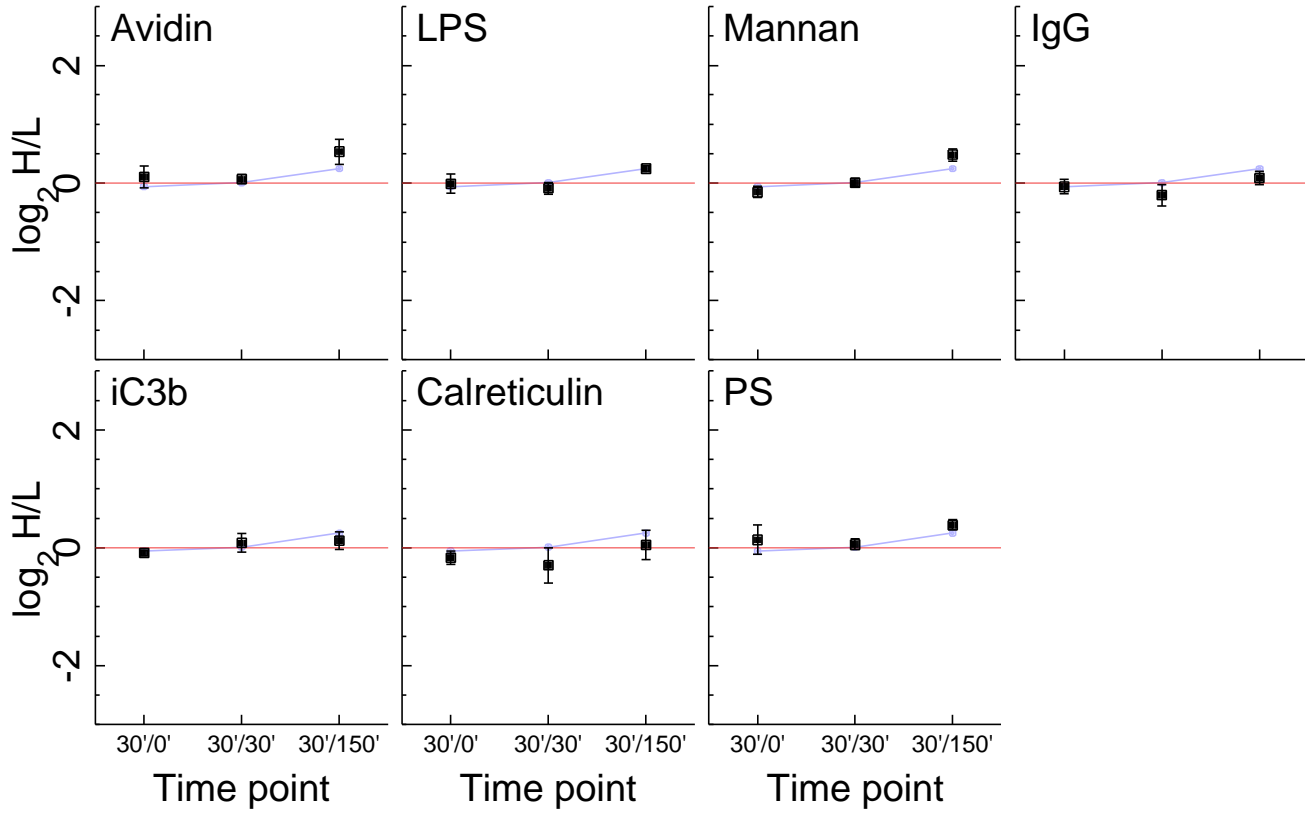

### scamp2 (Q9ERN0)

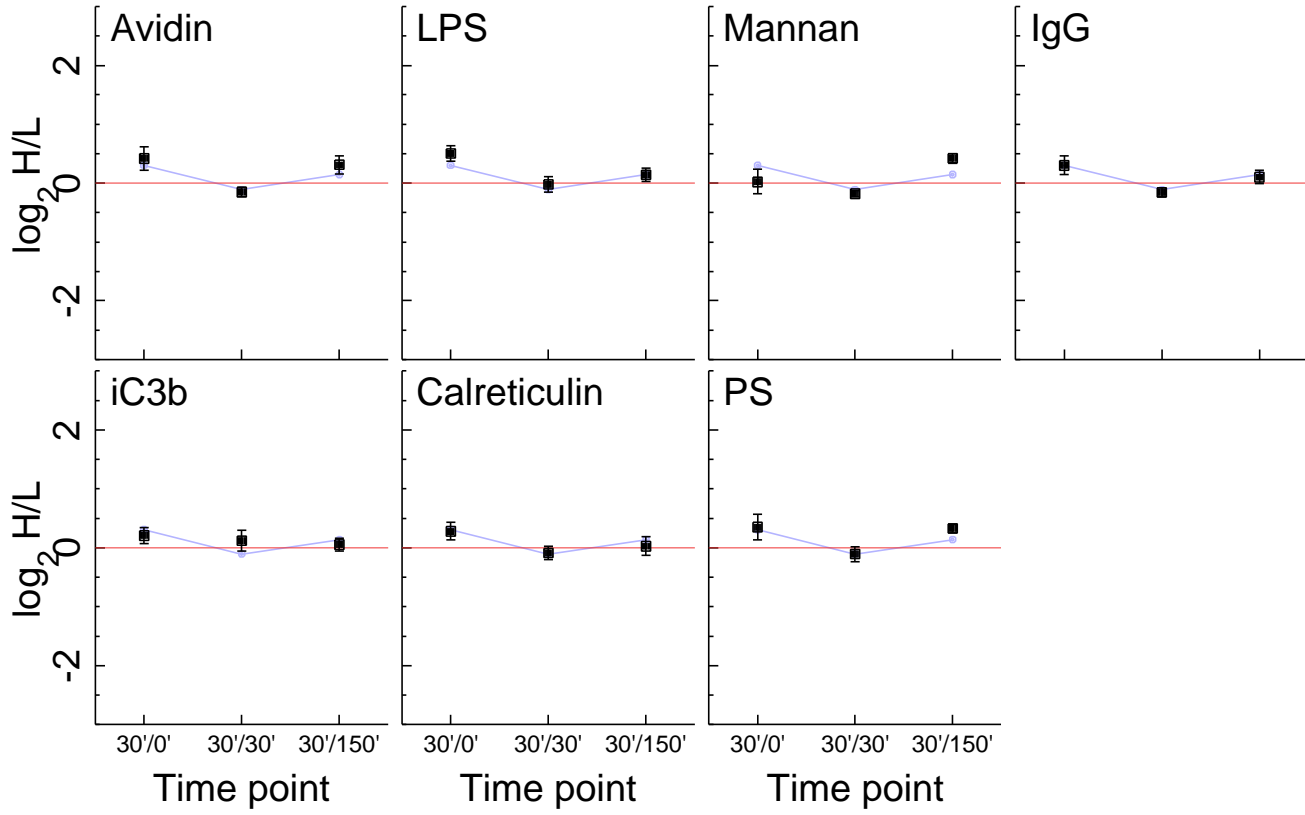



### scamp3 (Q3UXS0)

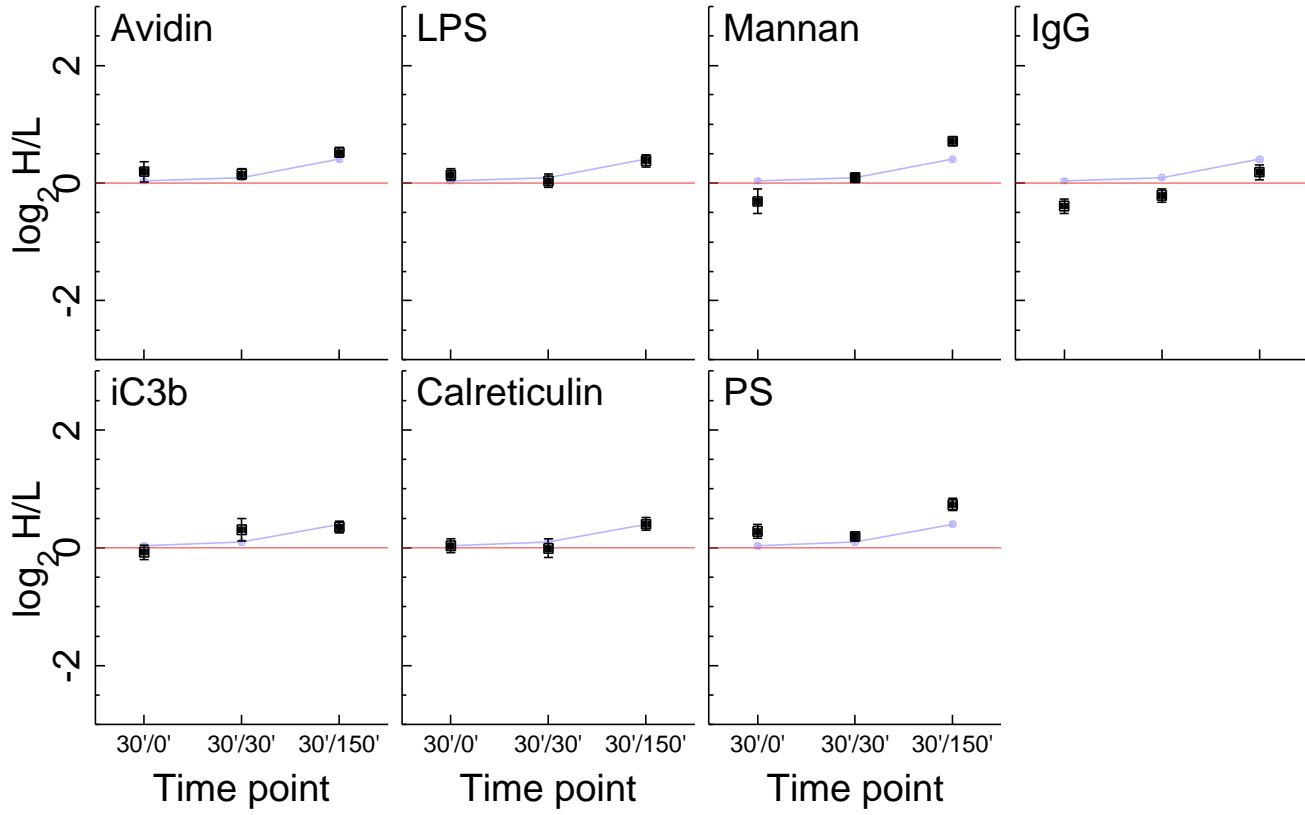

### scamp4 (Q9JKV5)

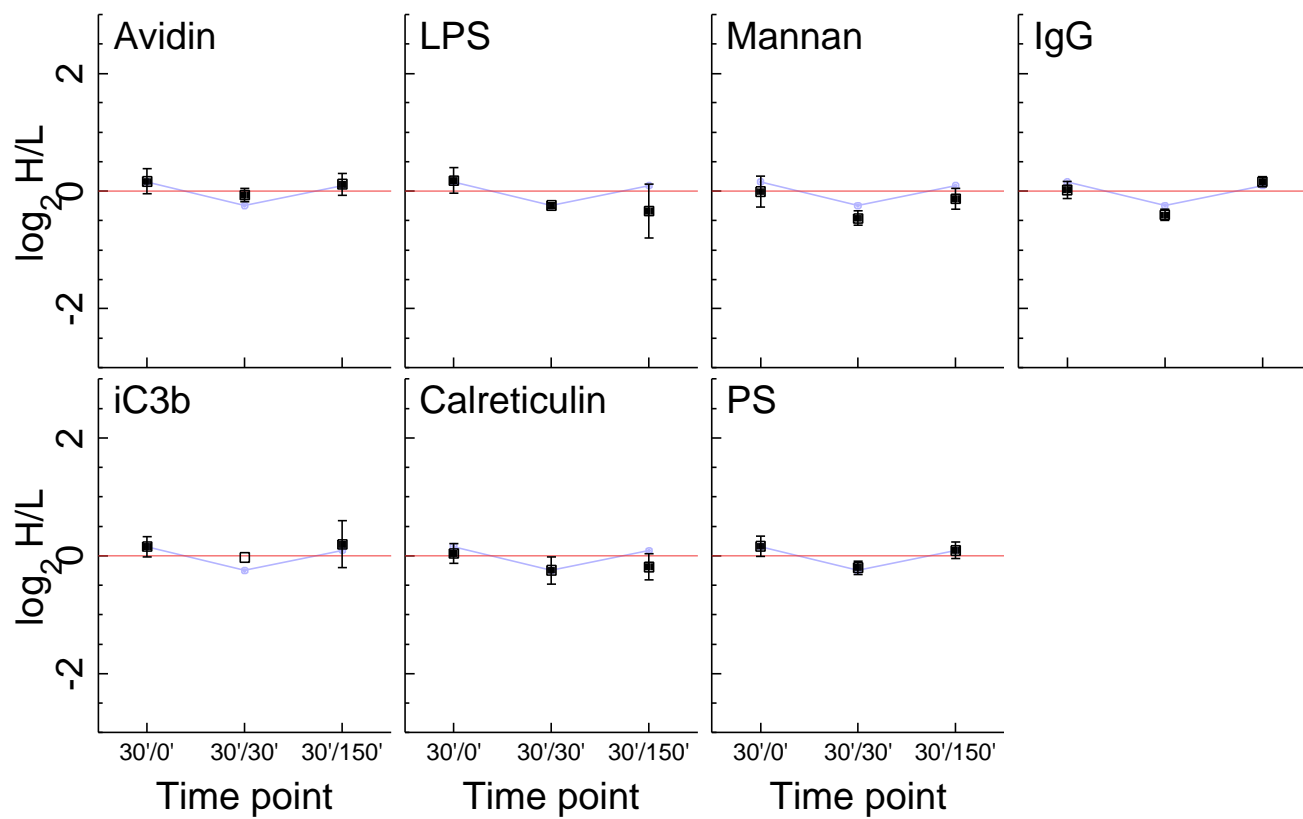

scarb1 (Q61009)

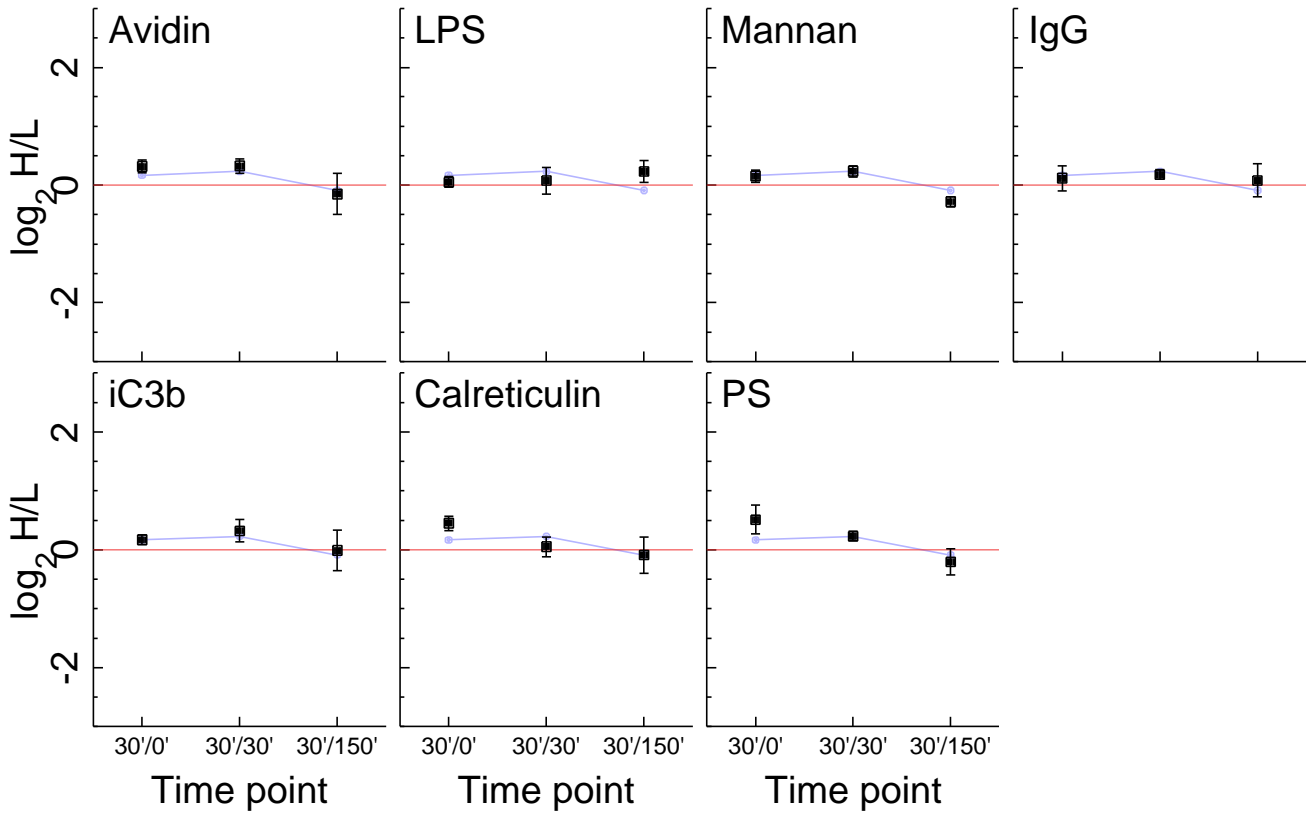

scarb2 (O35114)

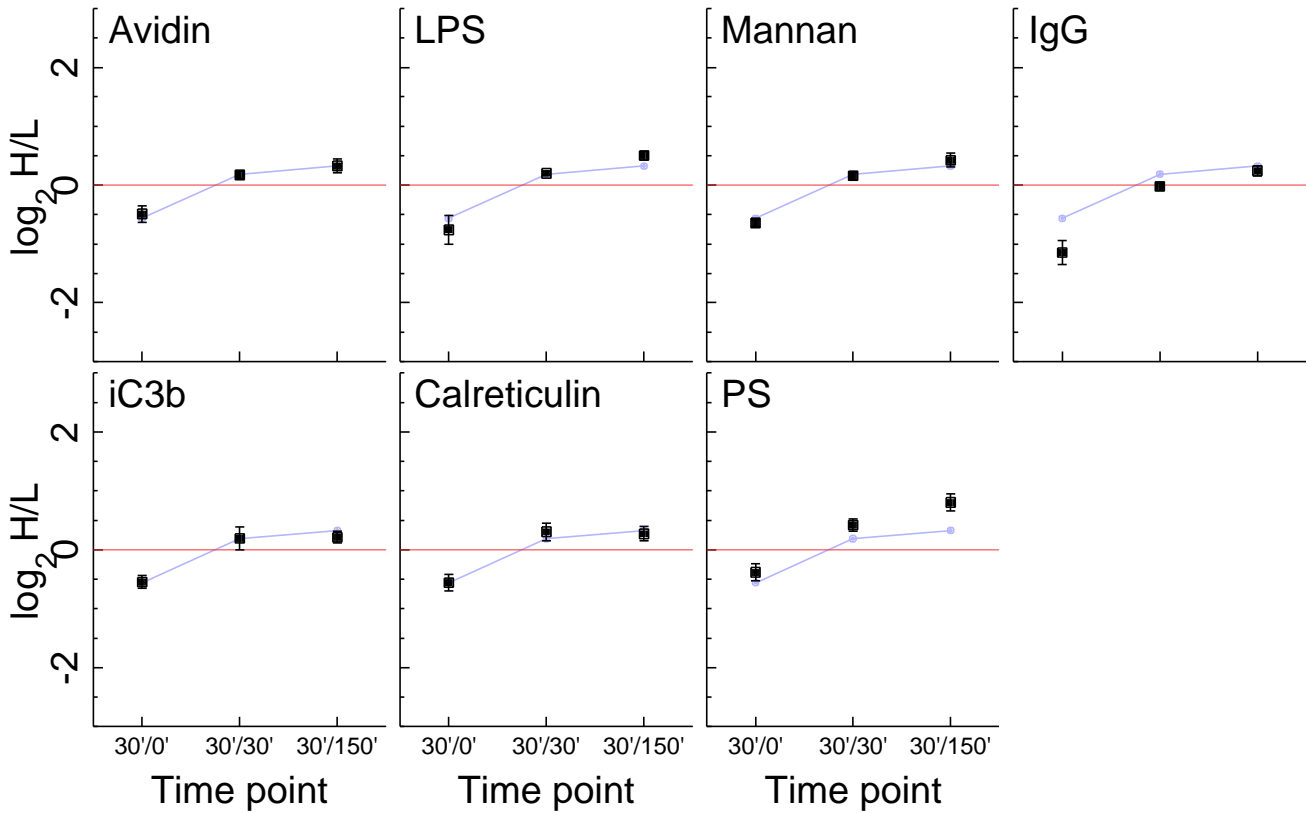

scfd1 (Q8BRF7)

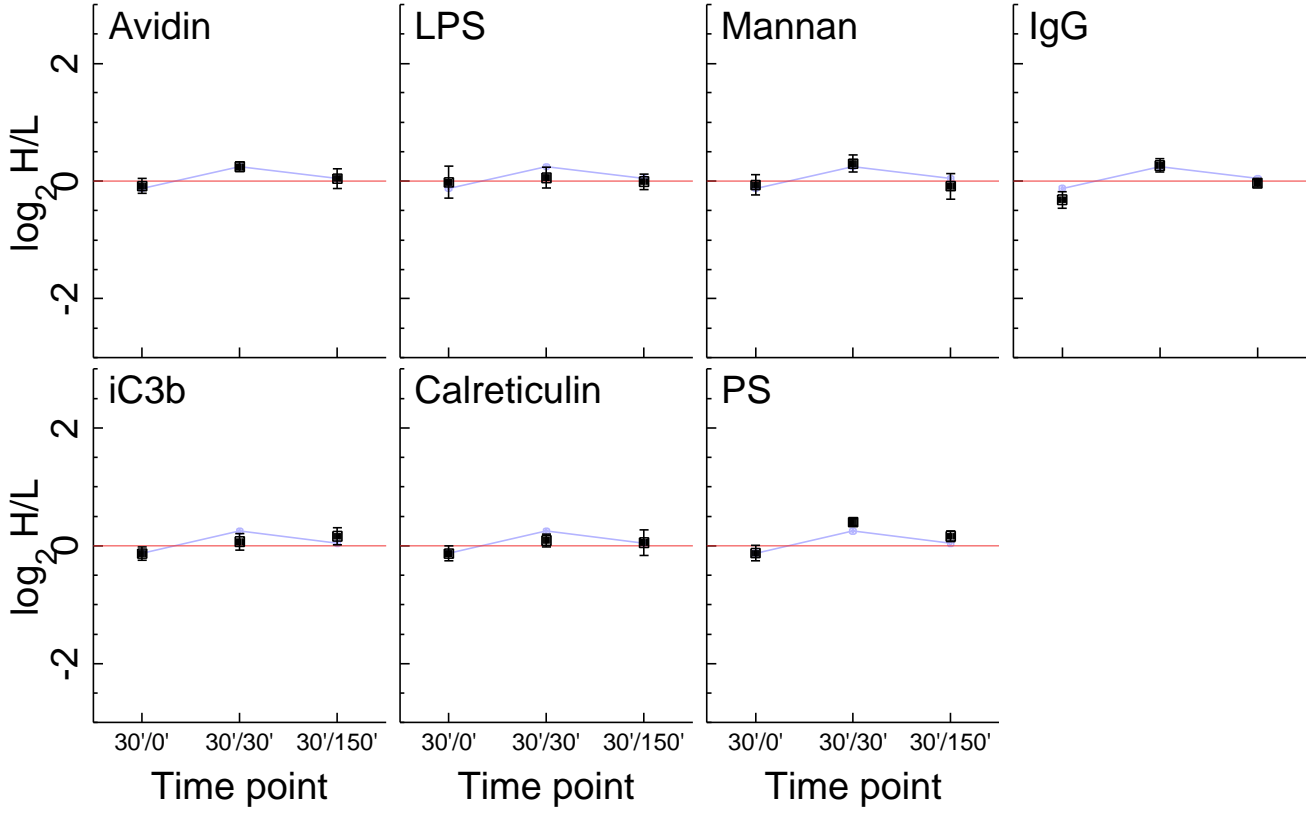

scp2 (P32020)

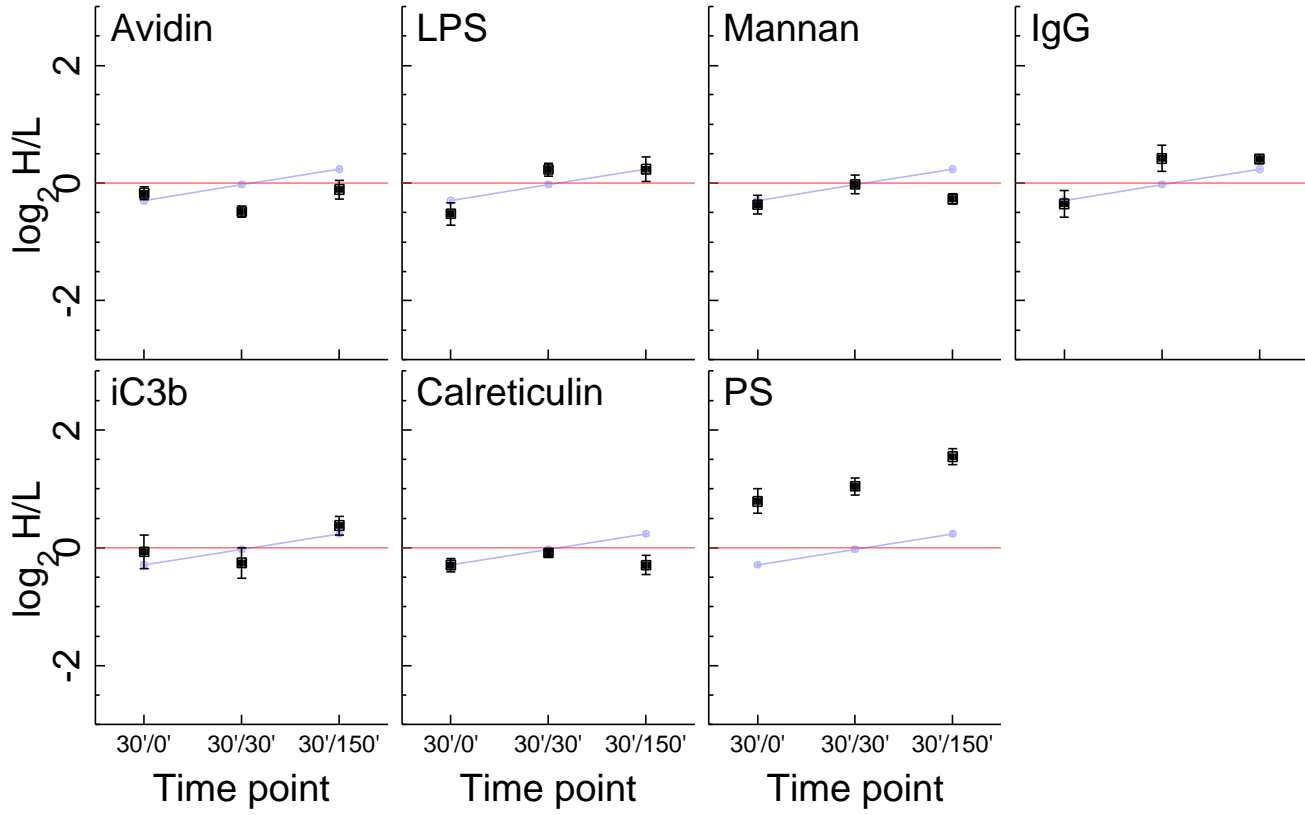

scsep1 (Q920A5)

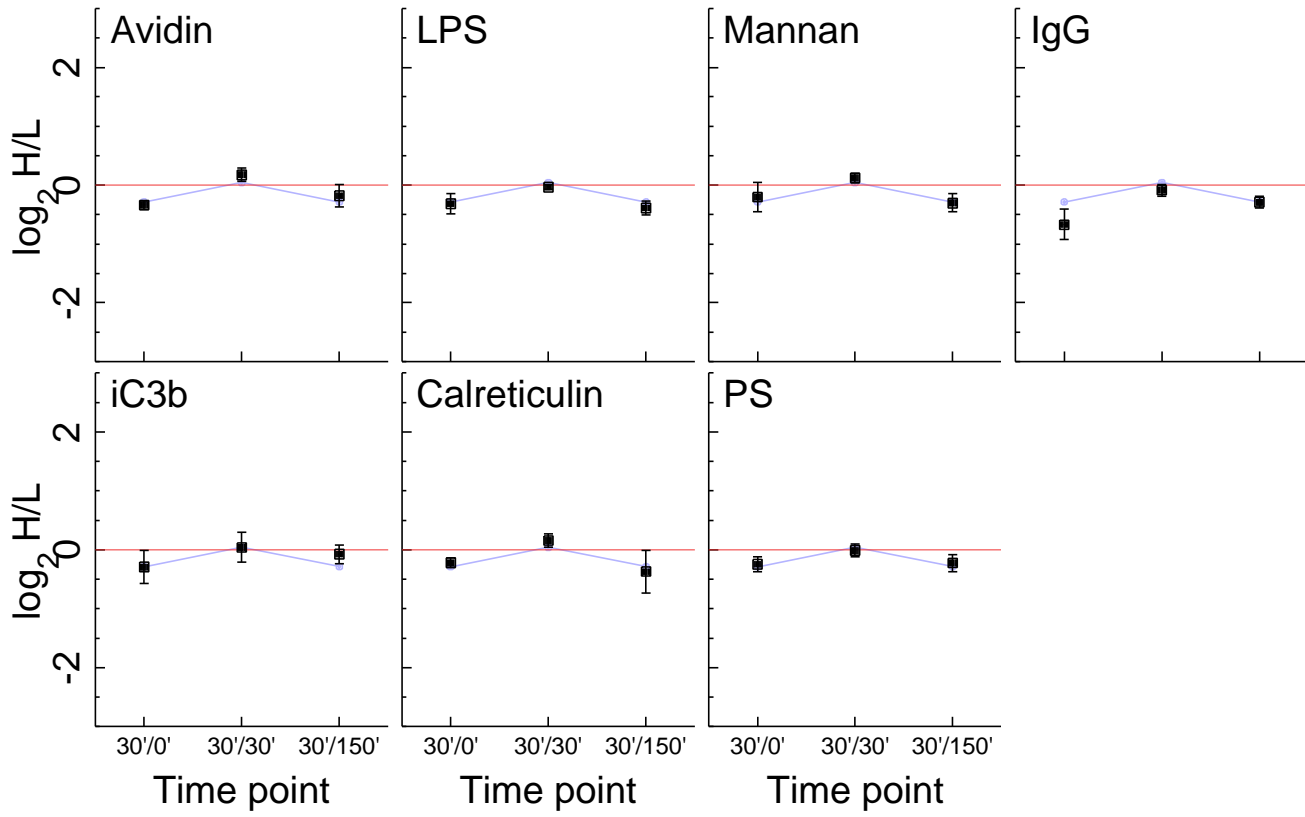

scyl2:1 (G5E8J9)

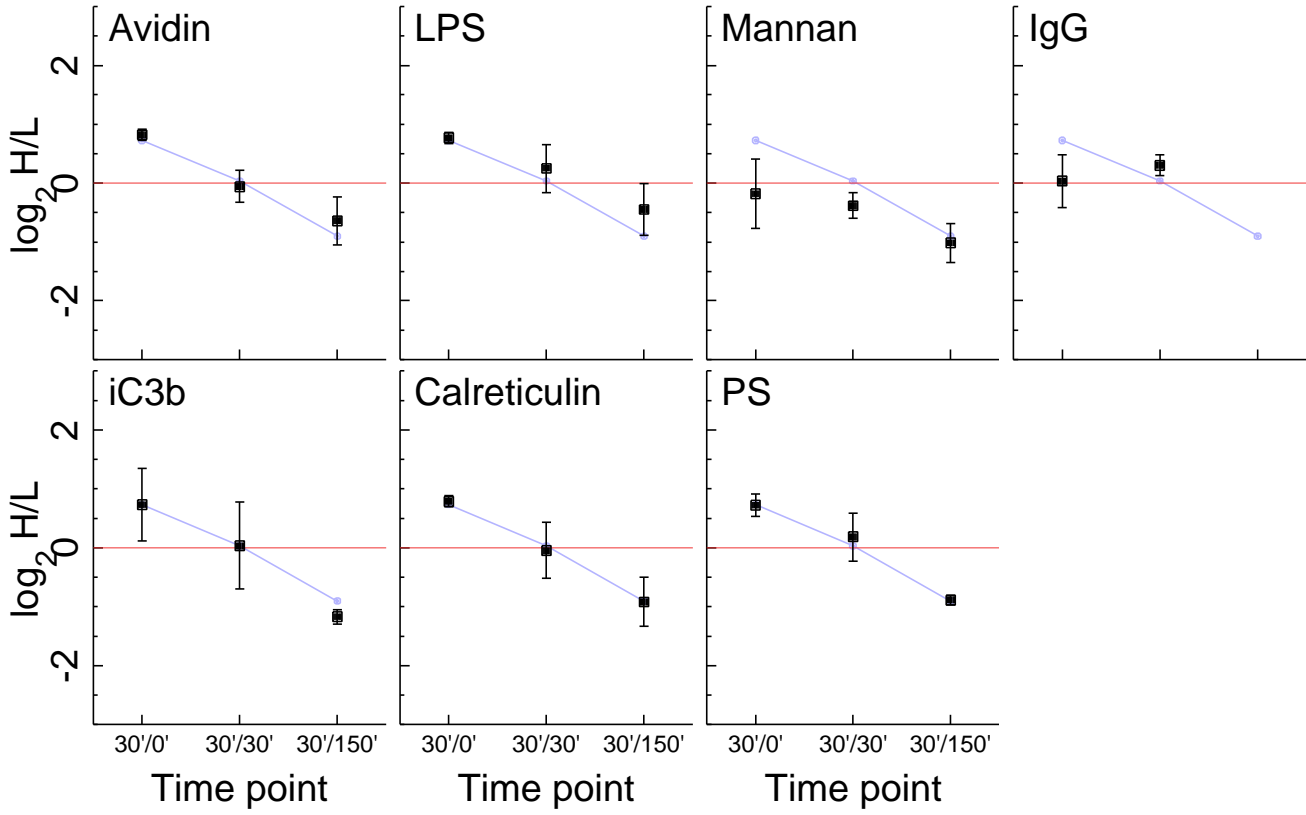



scyl2:2 (Q8CFE4)

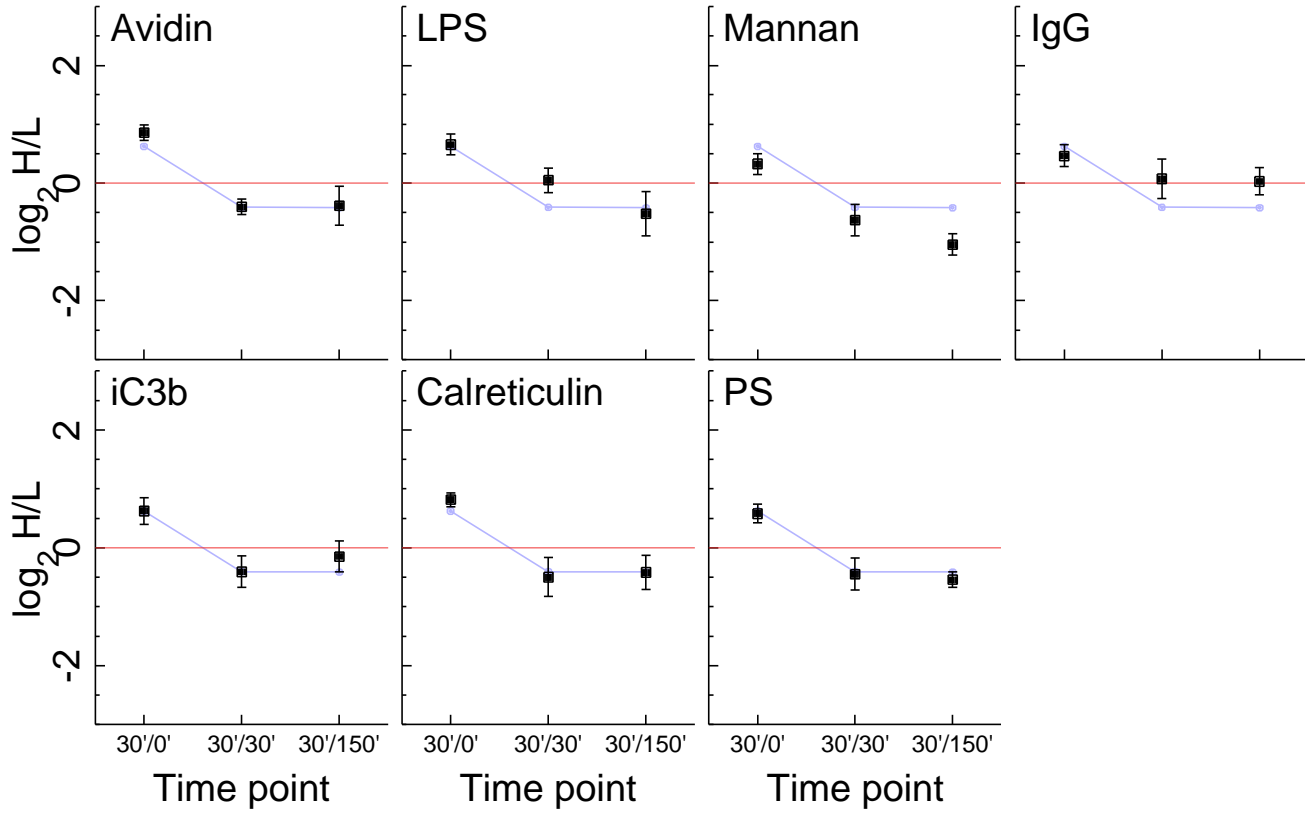

sdc4 (O35988)

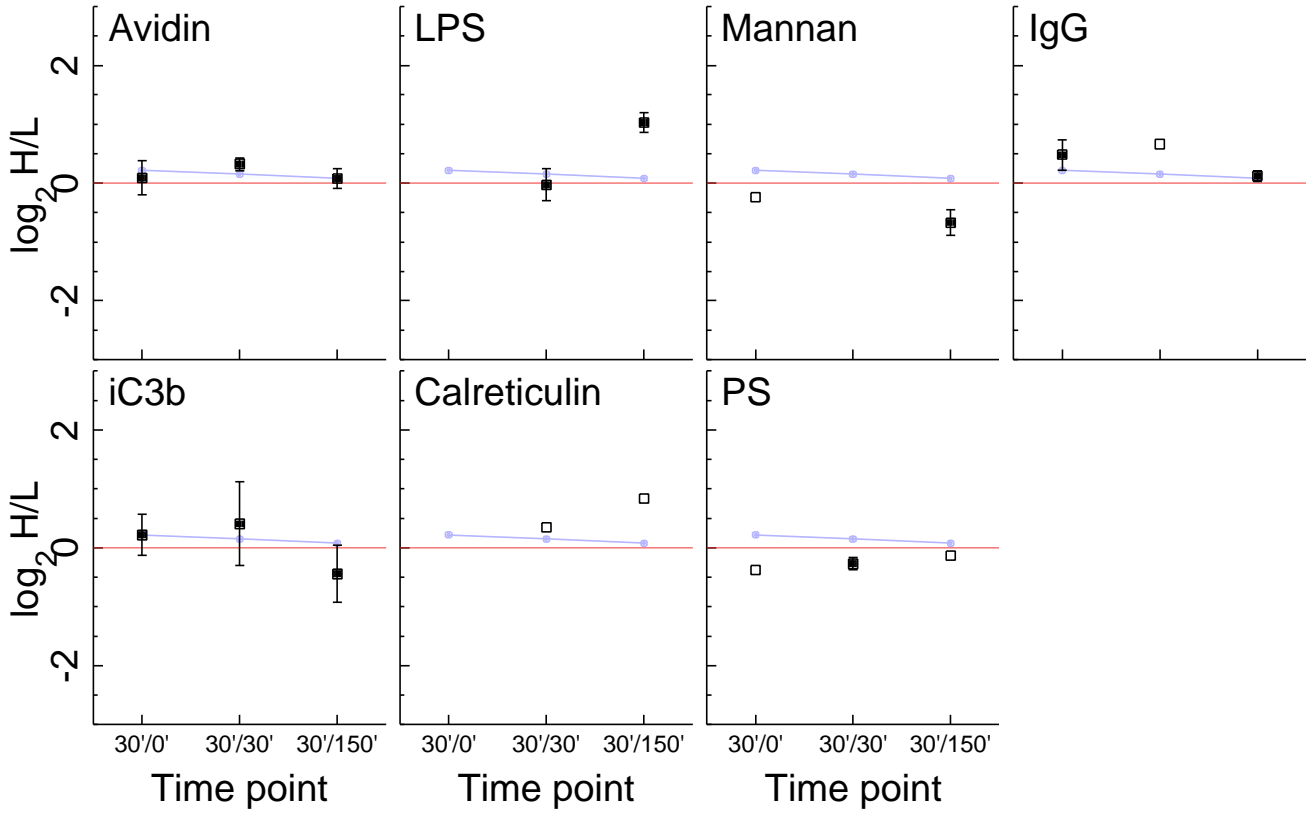

sdcbp (O08992)

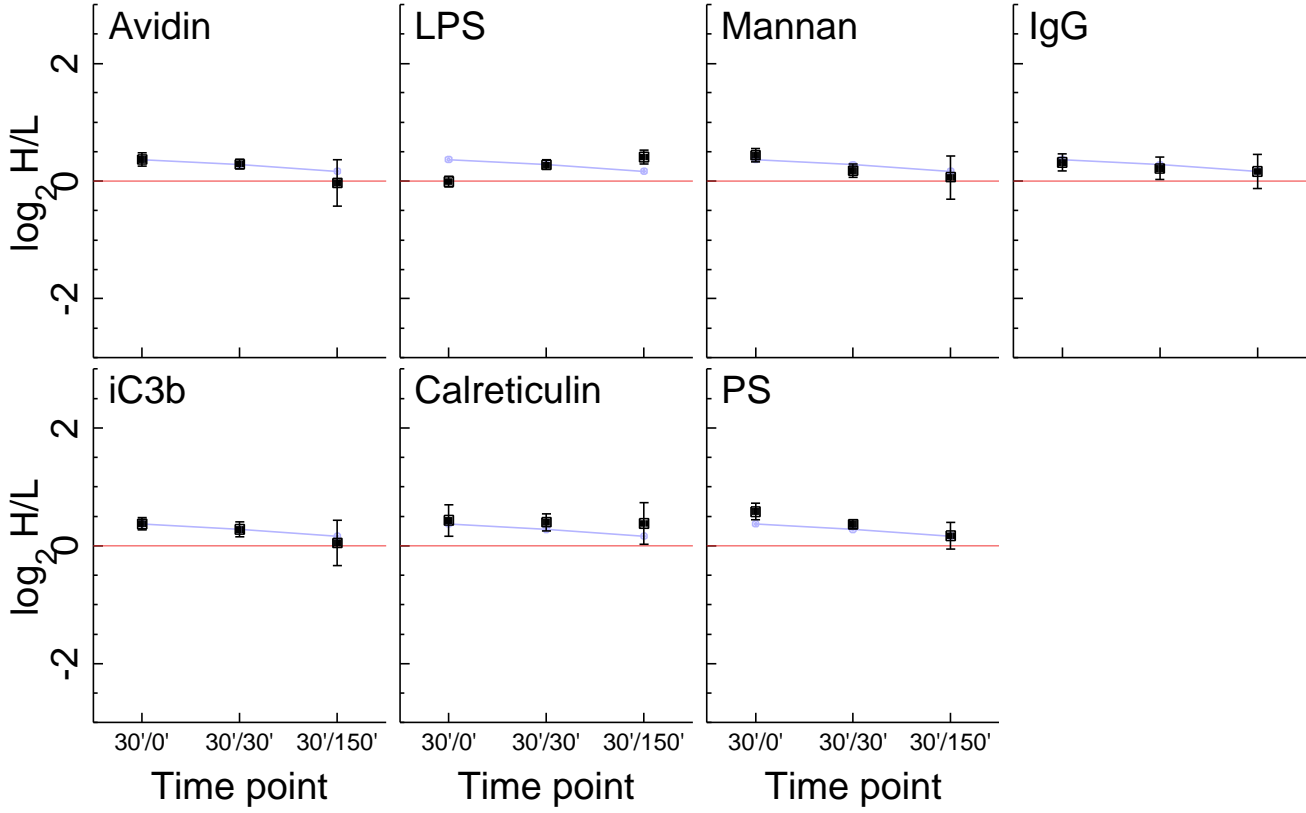

sdf211 (Q9ESP1)

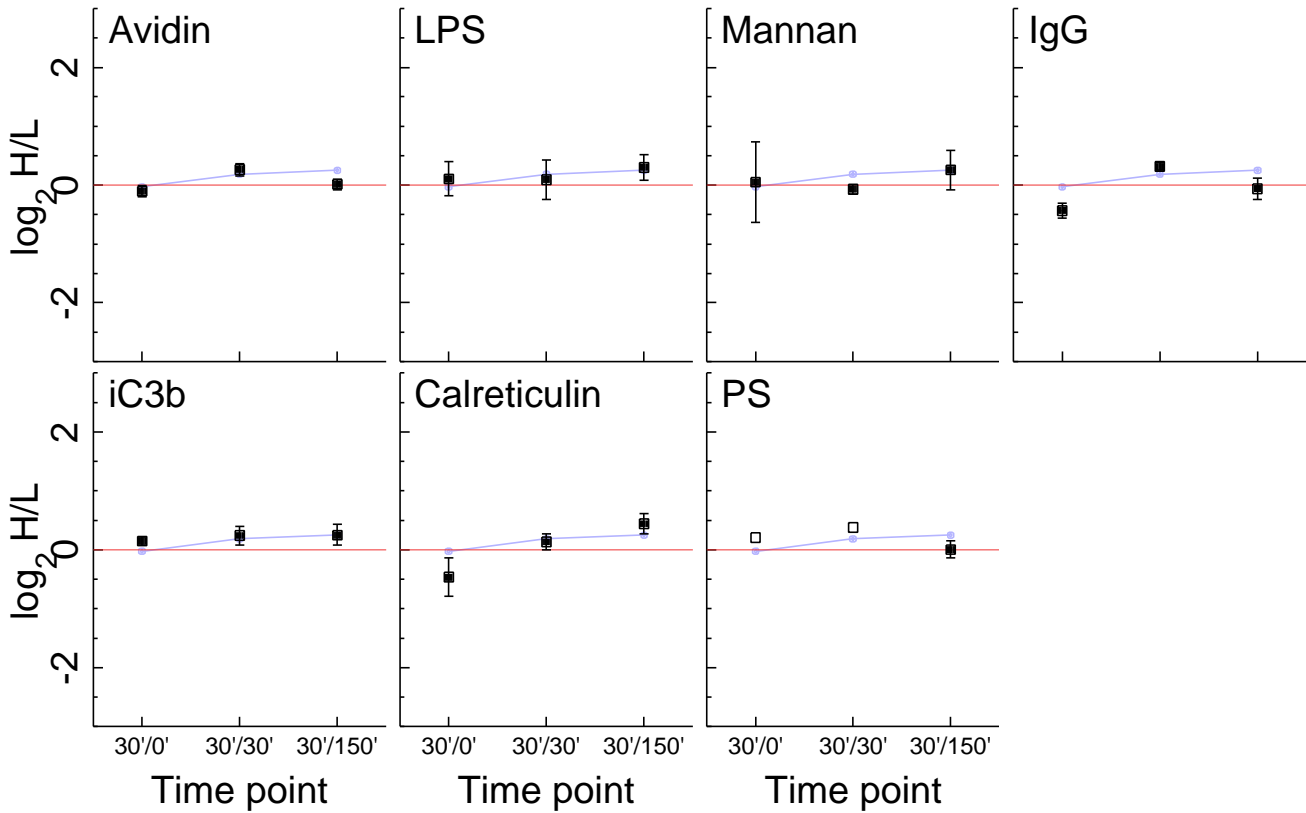

sdha (Q8K2B3)

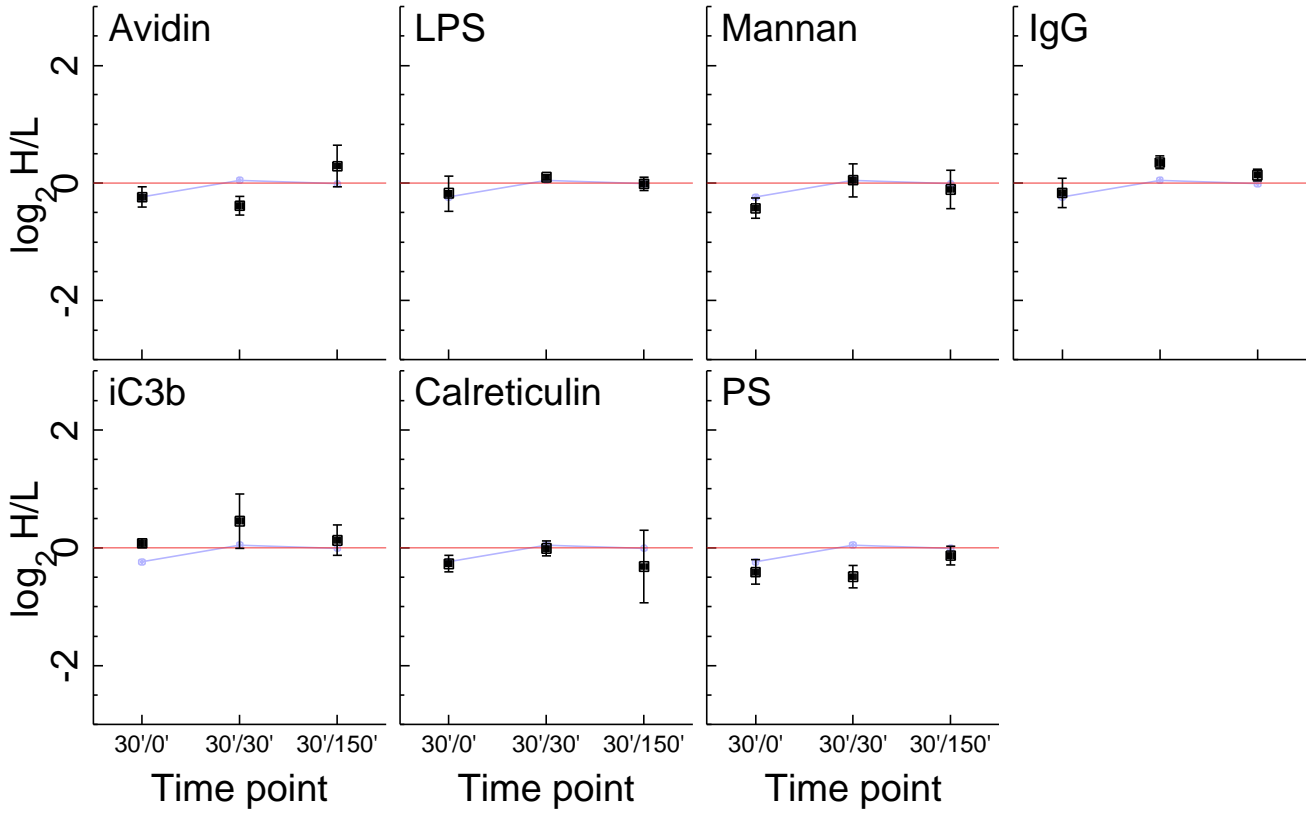

sdhb (Q9CQA3)

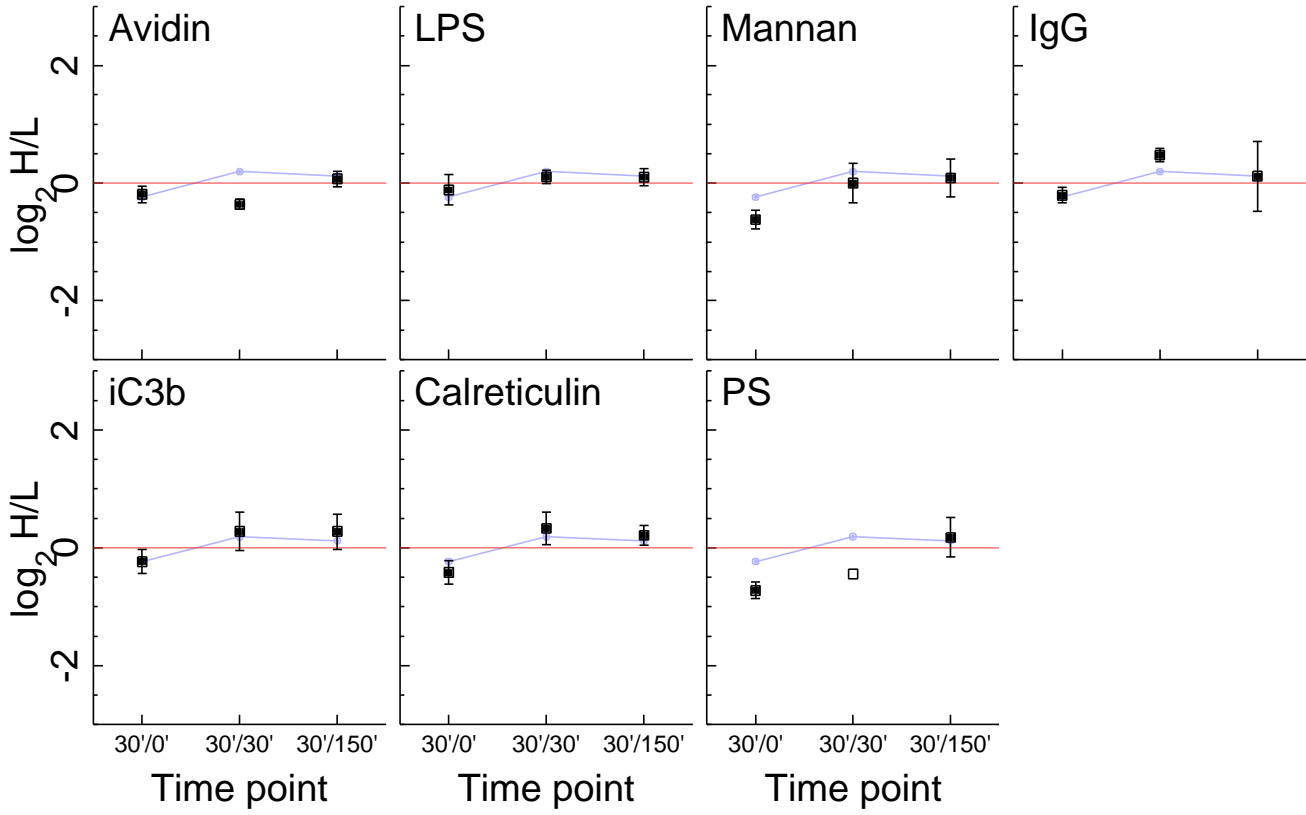

### sec11a (D3YTS1)

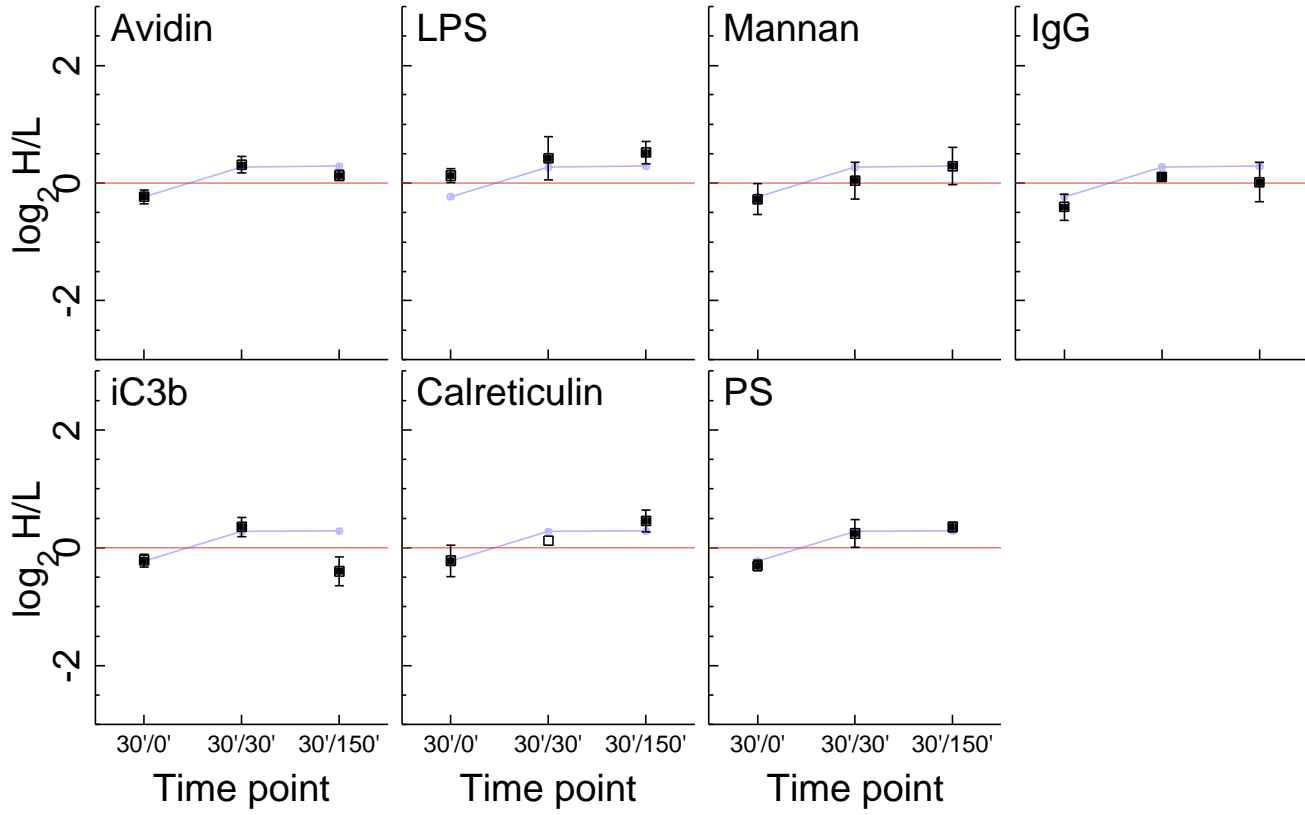

sec13 (Q9D1M0)

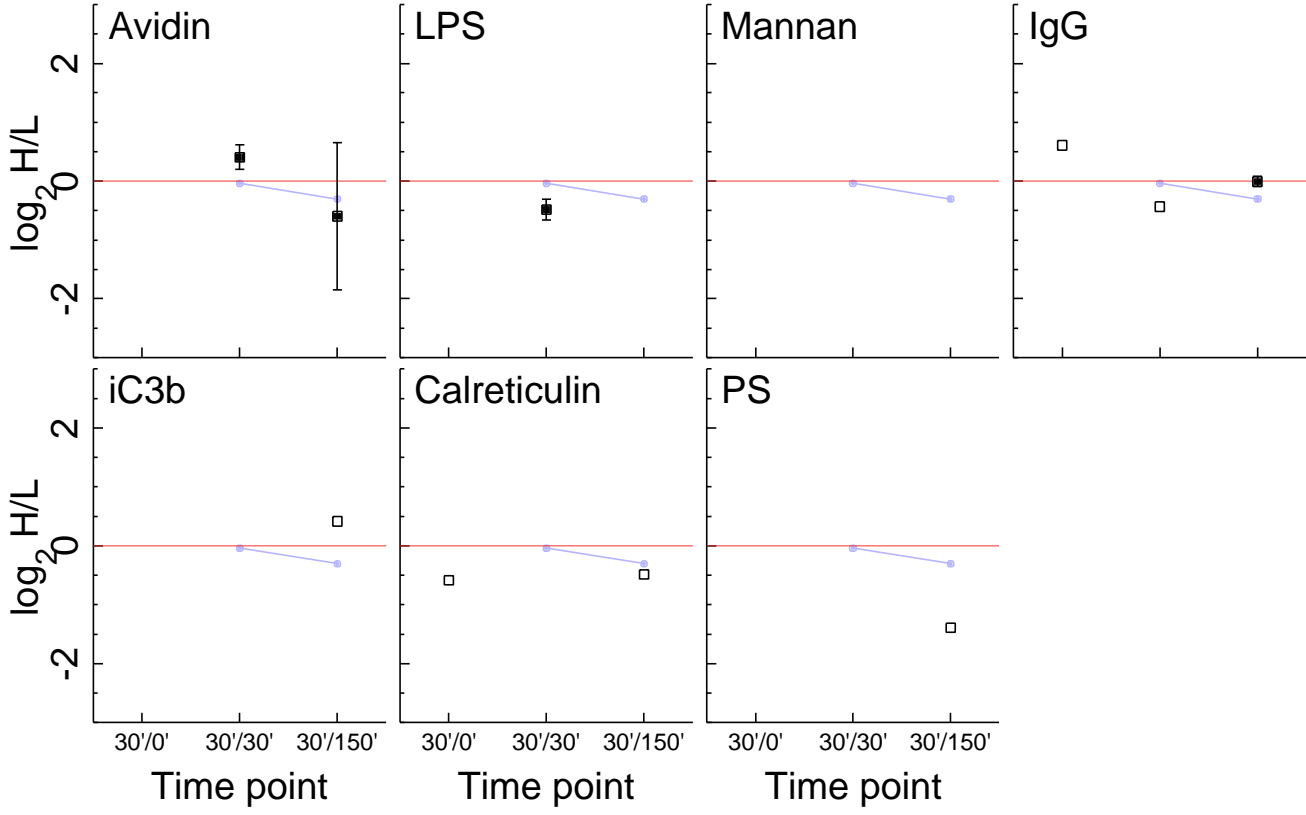



sec16a (A2AIX1)

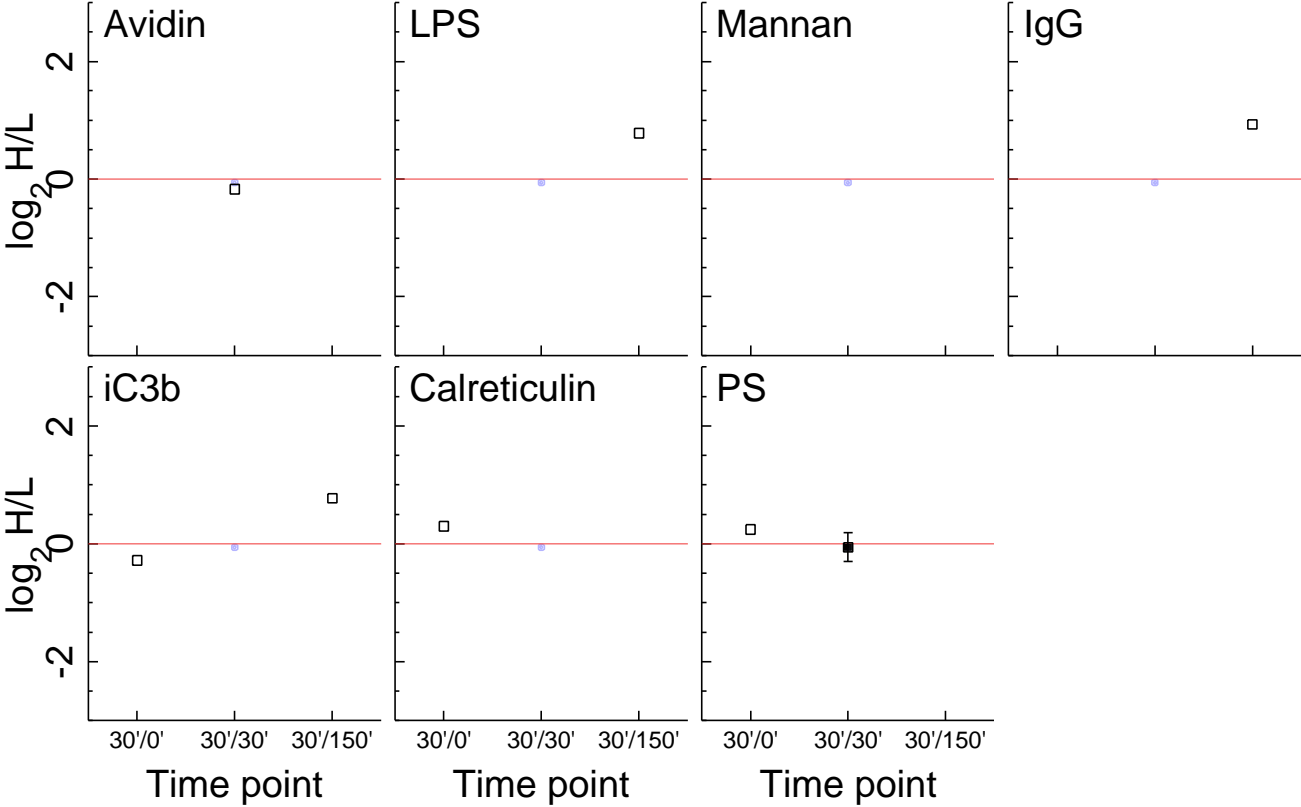

sec22b (O08547)

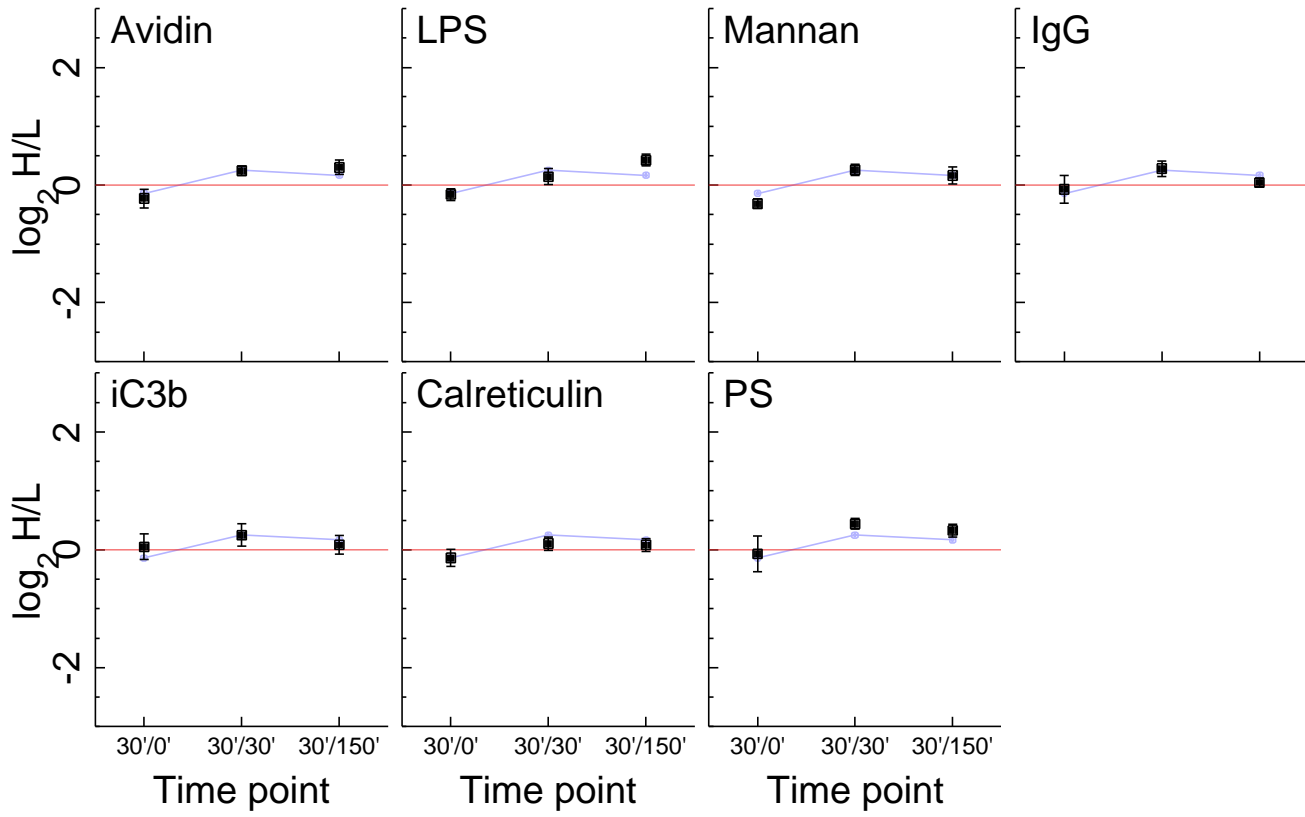

sec23b (Q9D662)

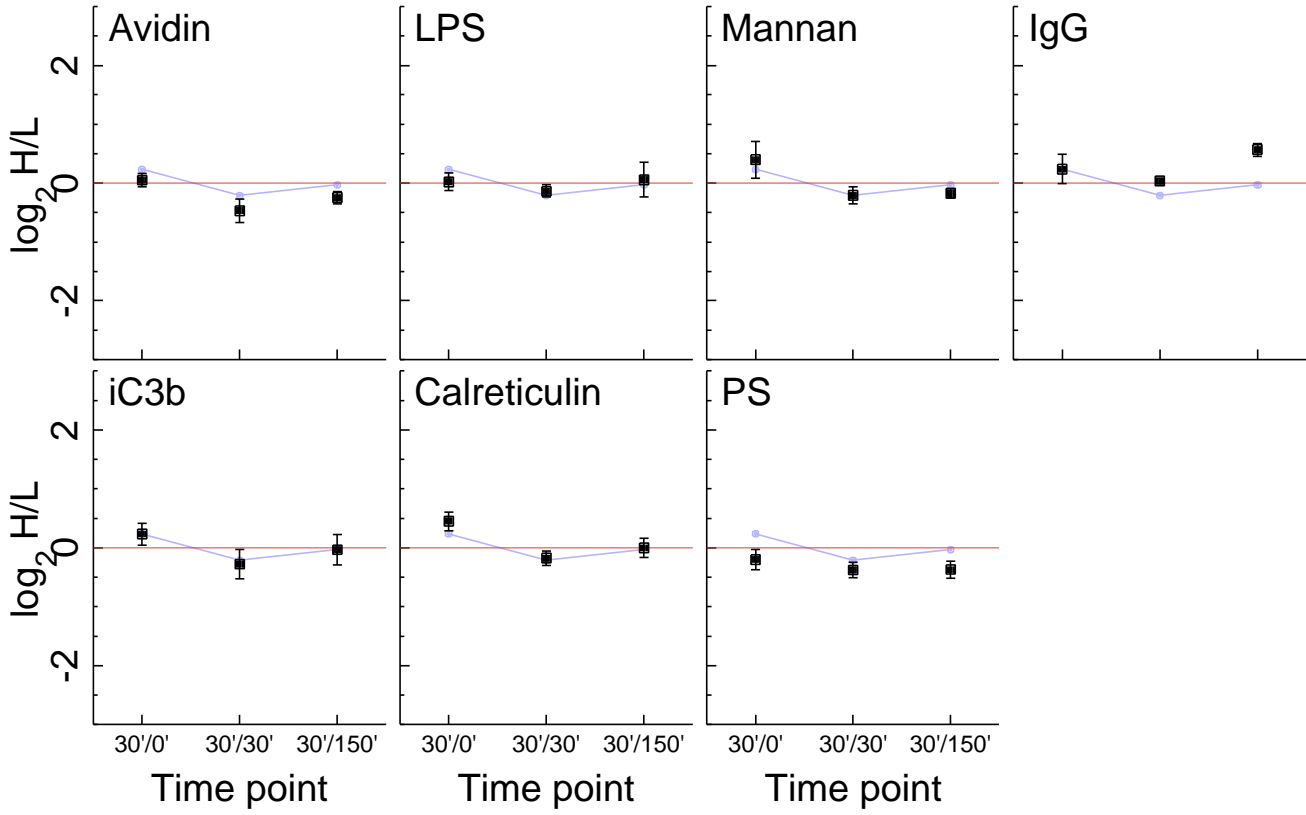

### sec24b (Q80ZX0)

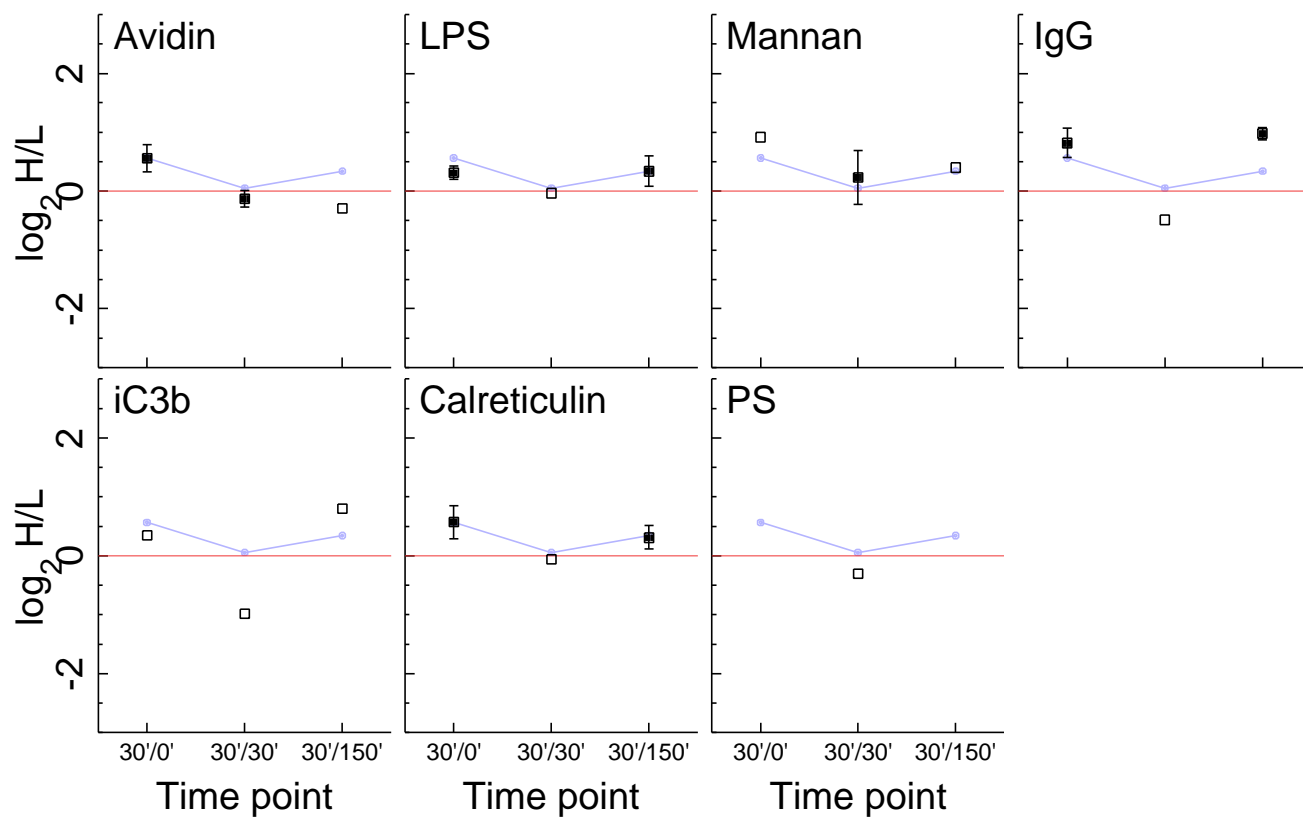

sec24c (G3X972)

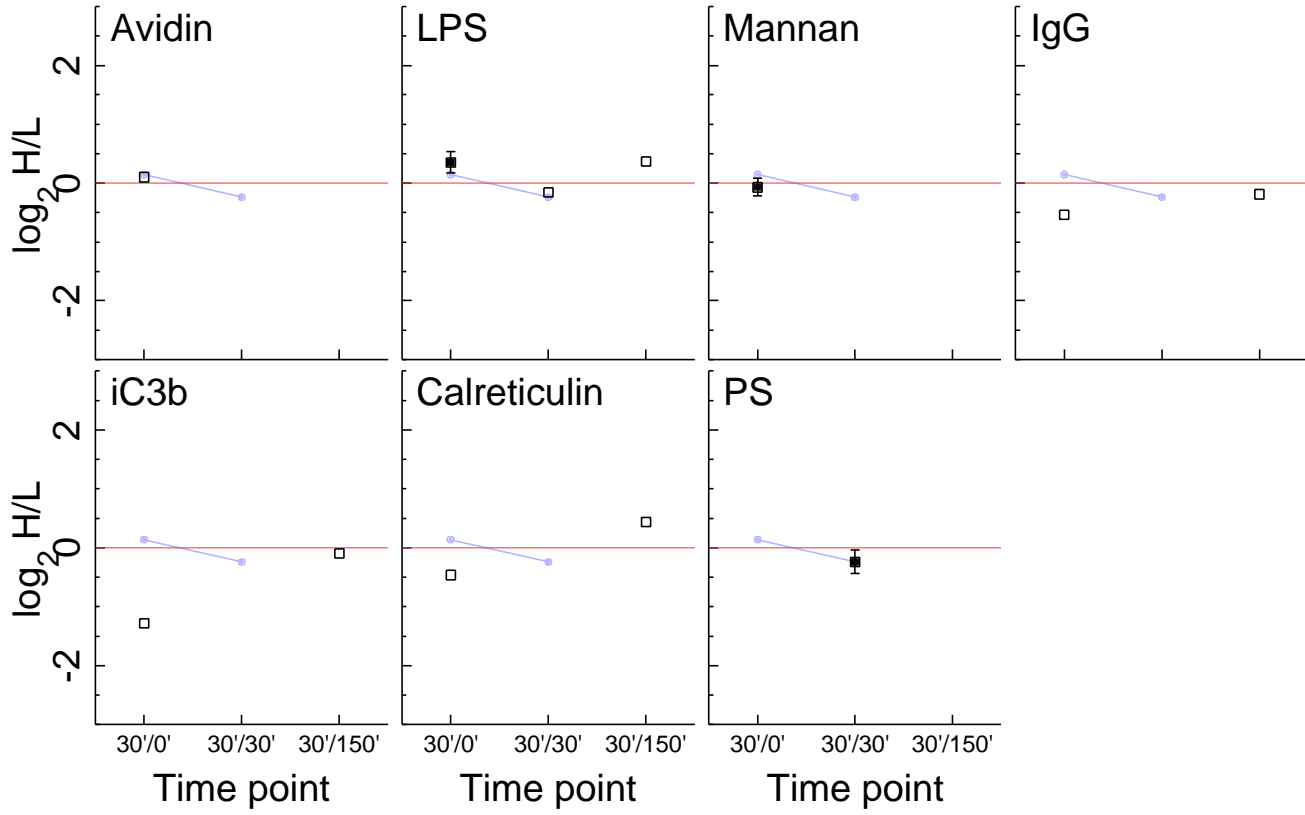

### sec31a (Q3UPL0)

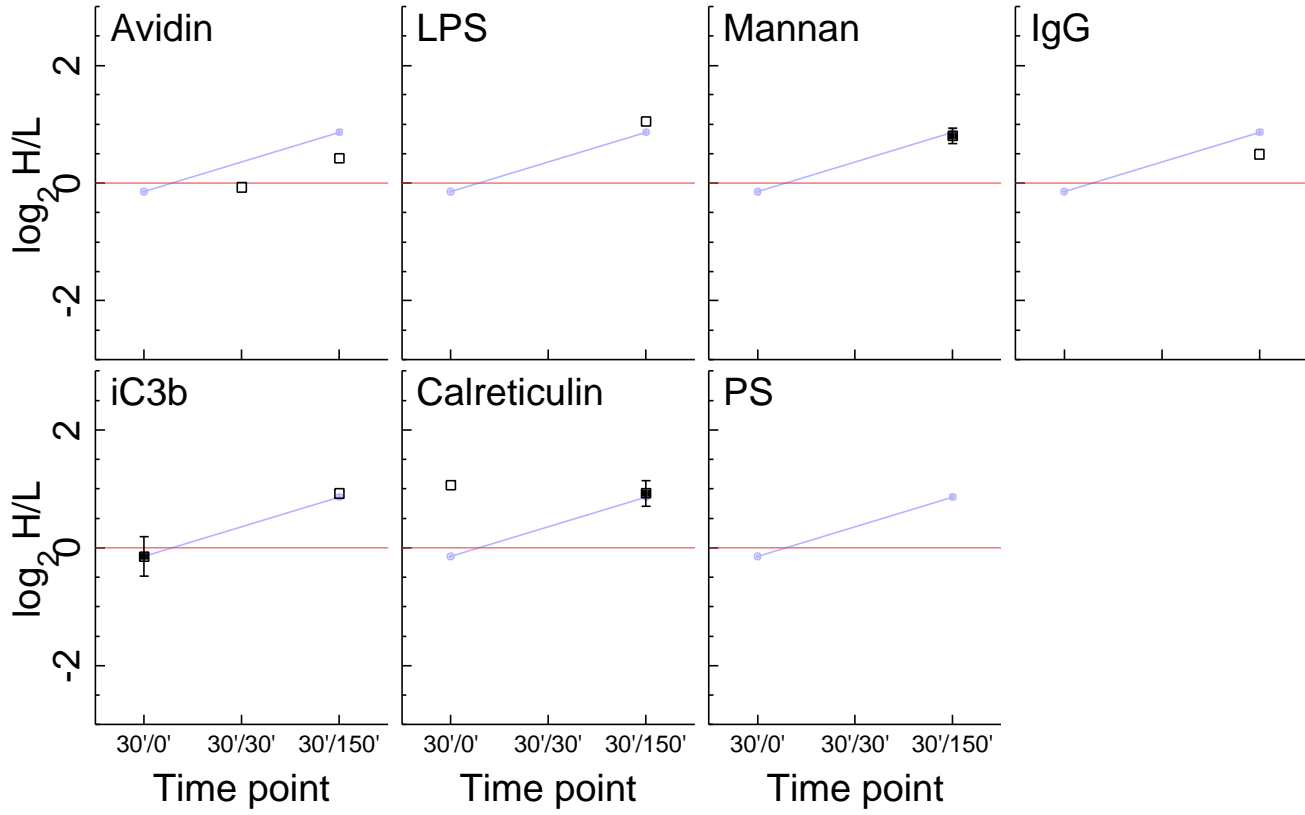

### sec61a1 (P61620)

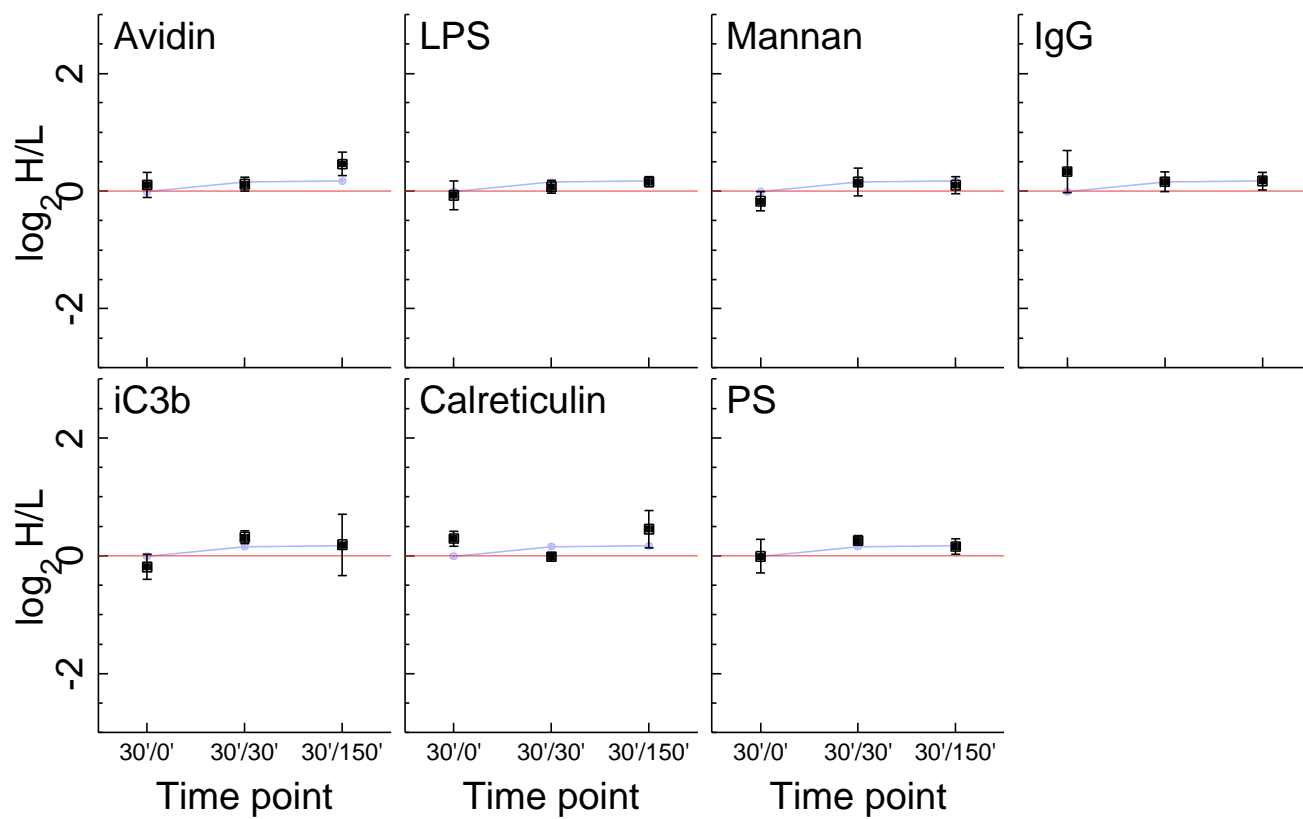

### sec62 (Q8BU14)

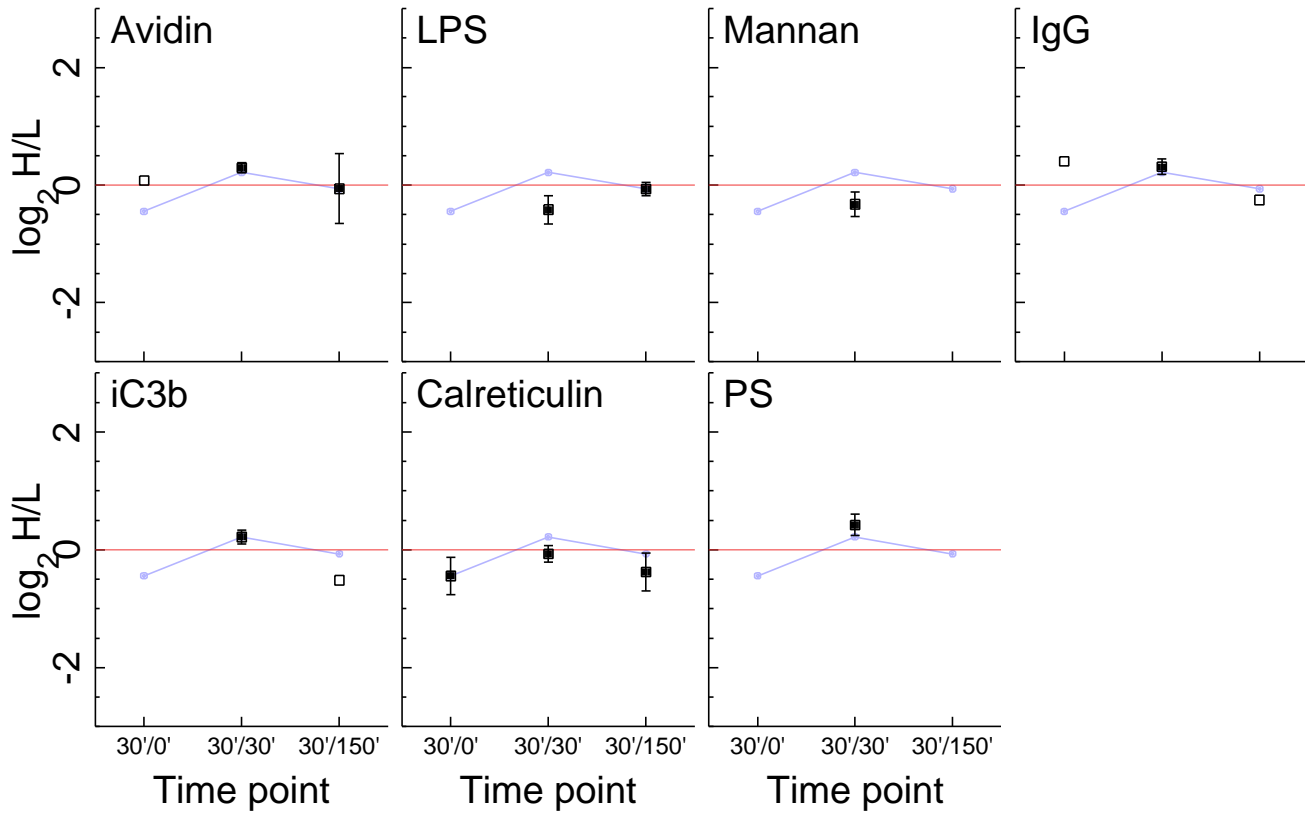



sel1l (Q9Z2G6)

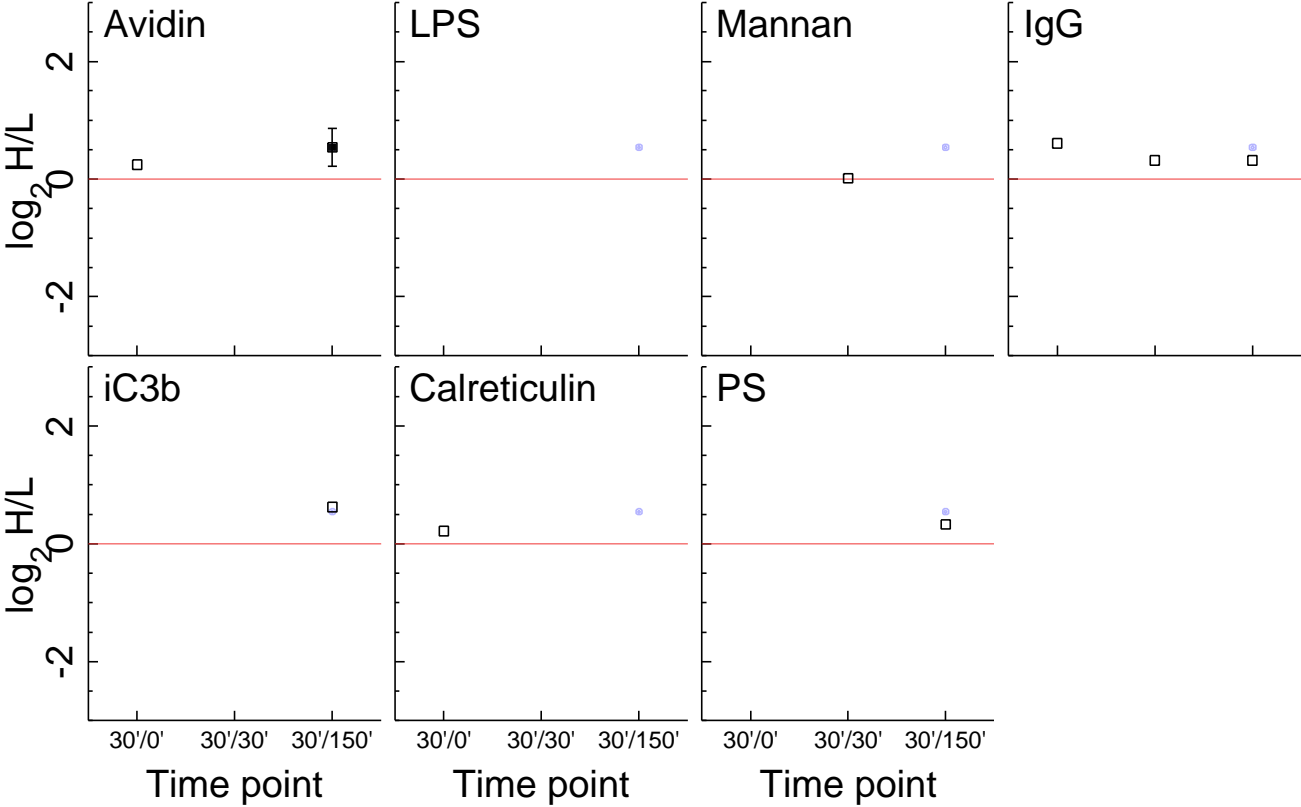

sema4d (O09126)

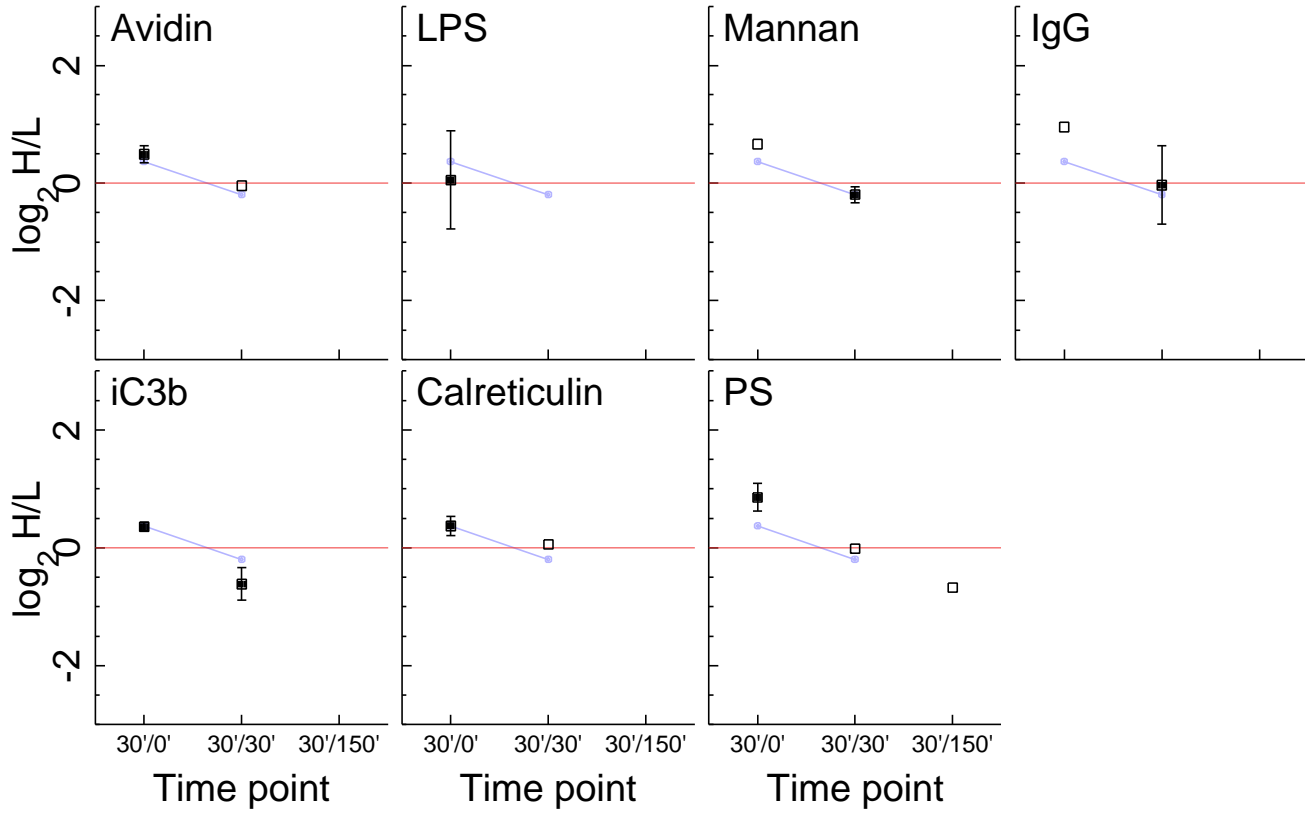

sep-02 (P42208)

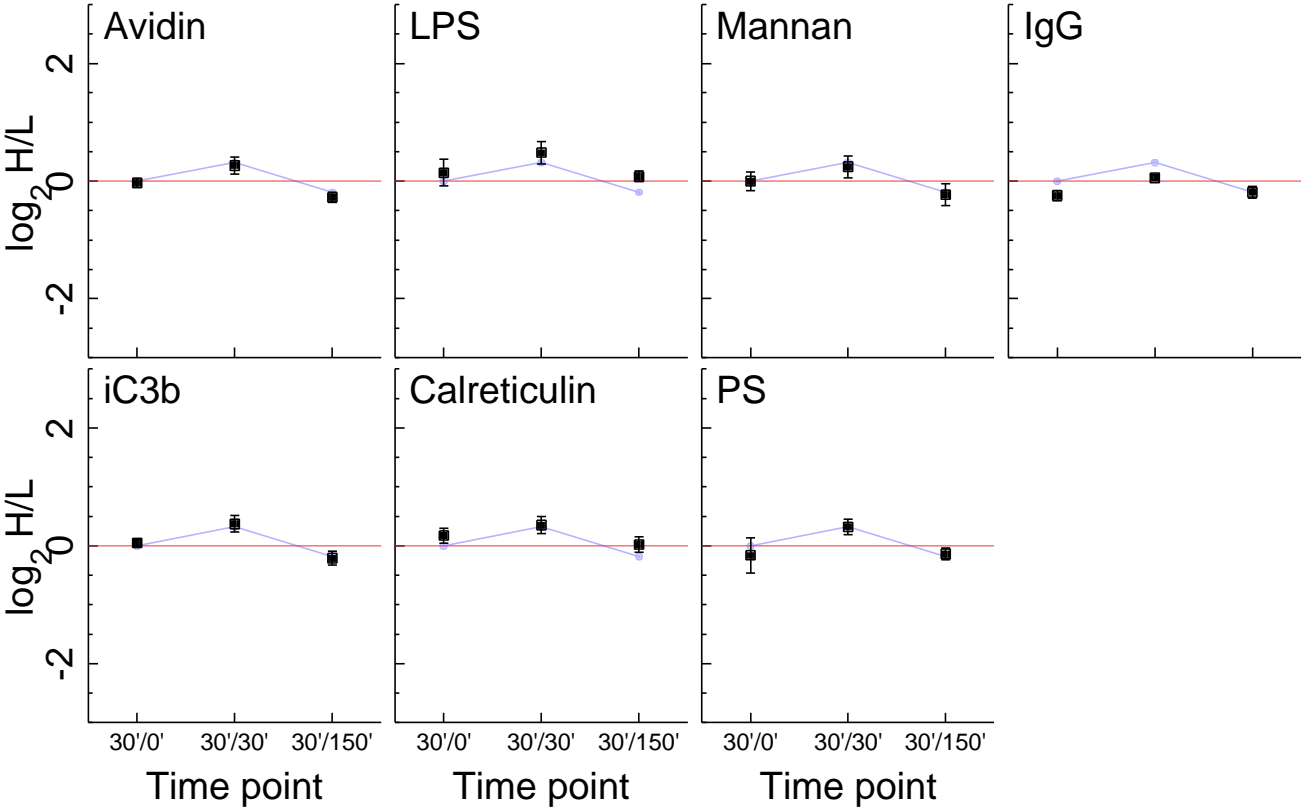

sep-07 (E9Q1G8)

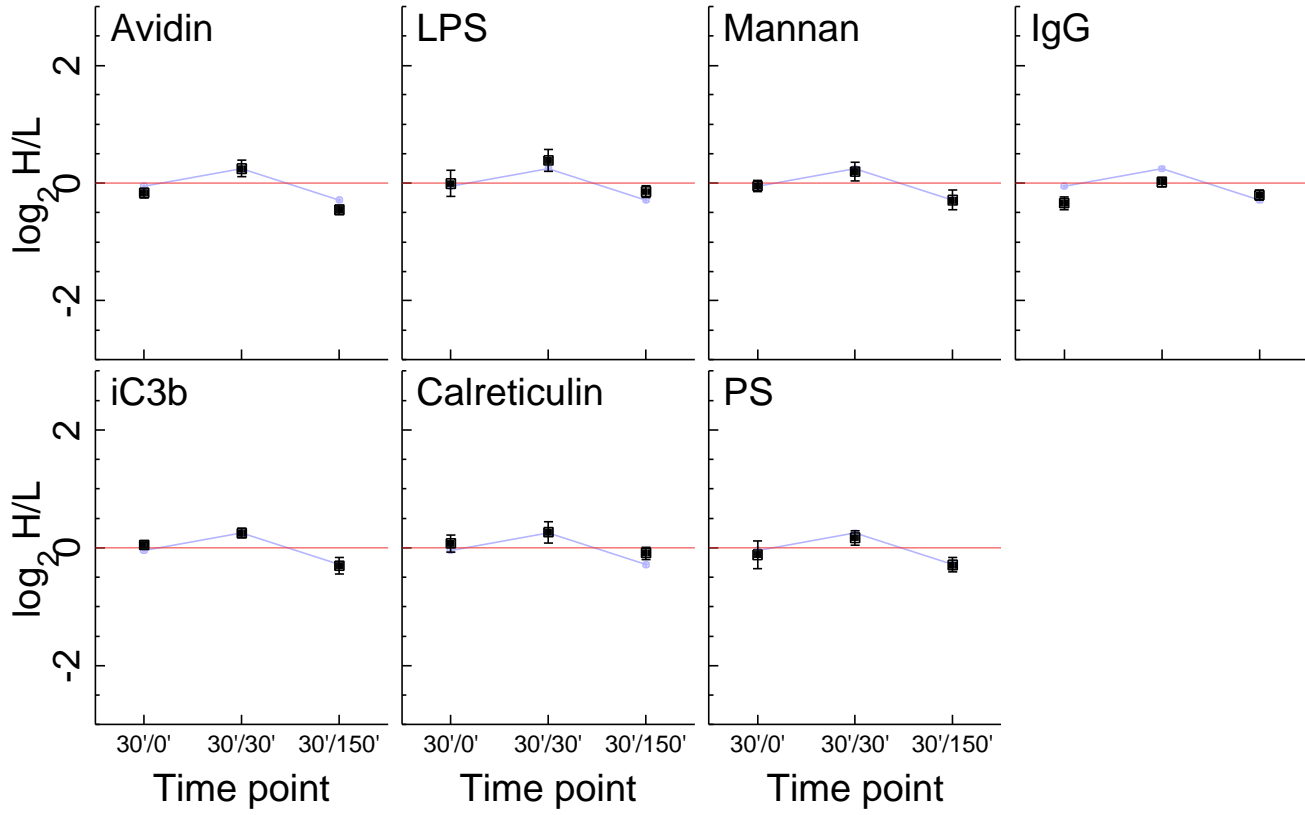

sep-08 (B1AQZ0)

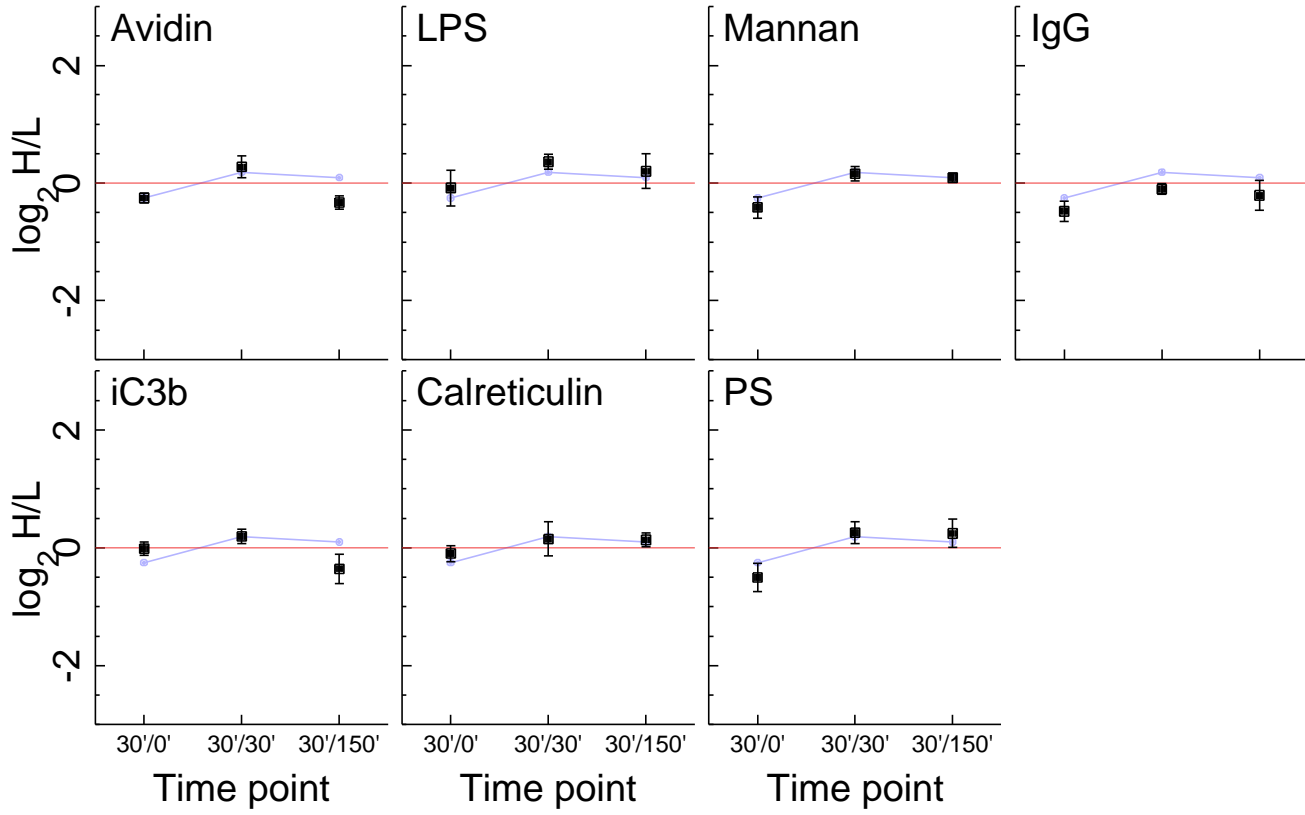

sep-09 (Q80UG5)

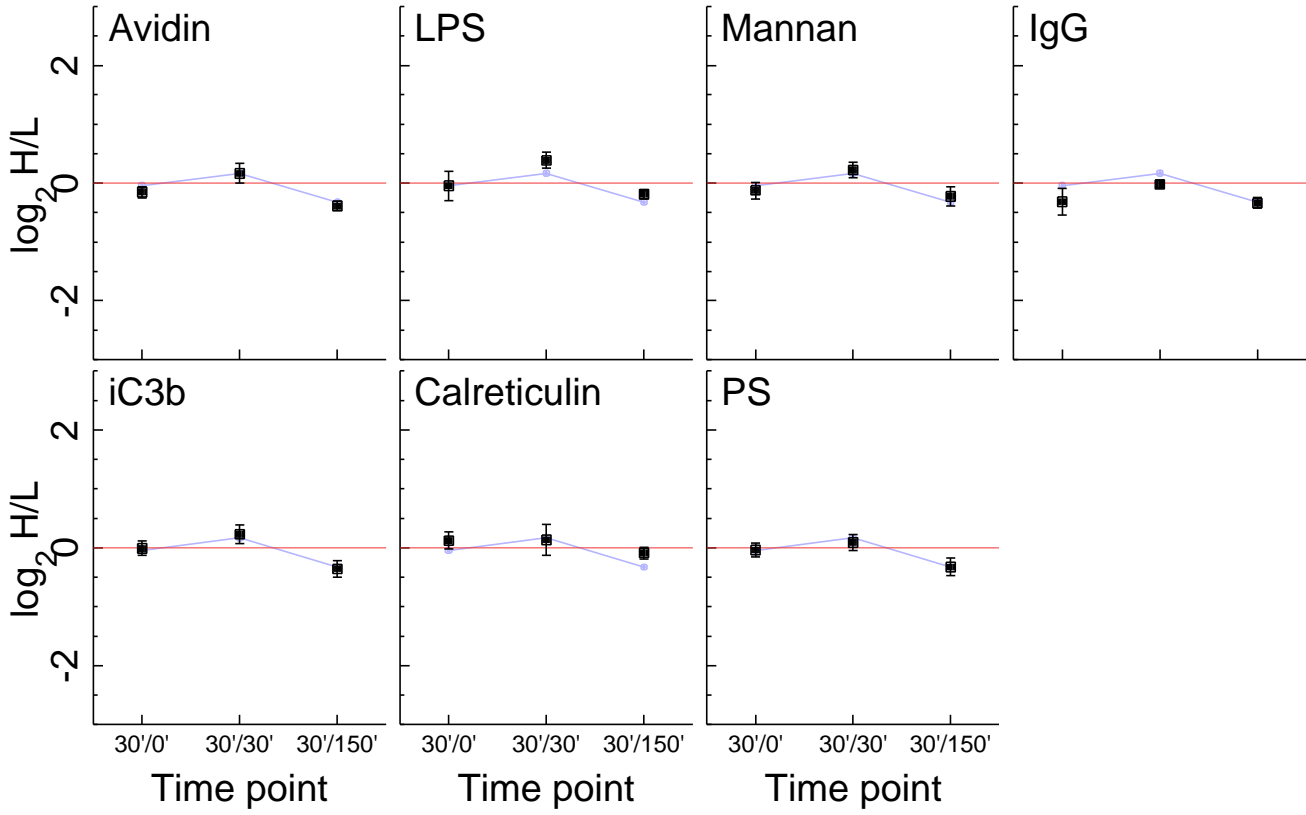

sep-11 (Q8C1B7)

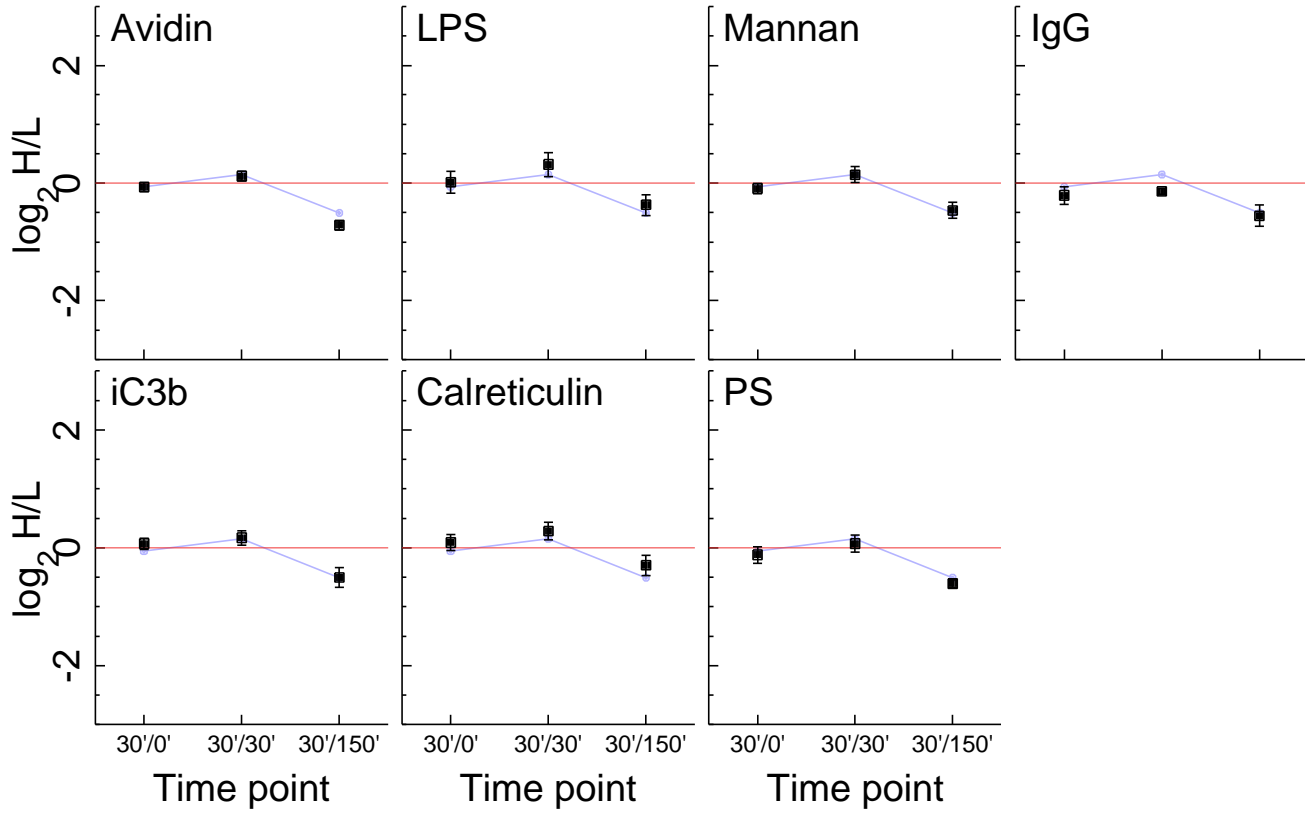

sep-15 (Q9ERR7)

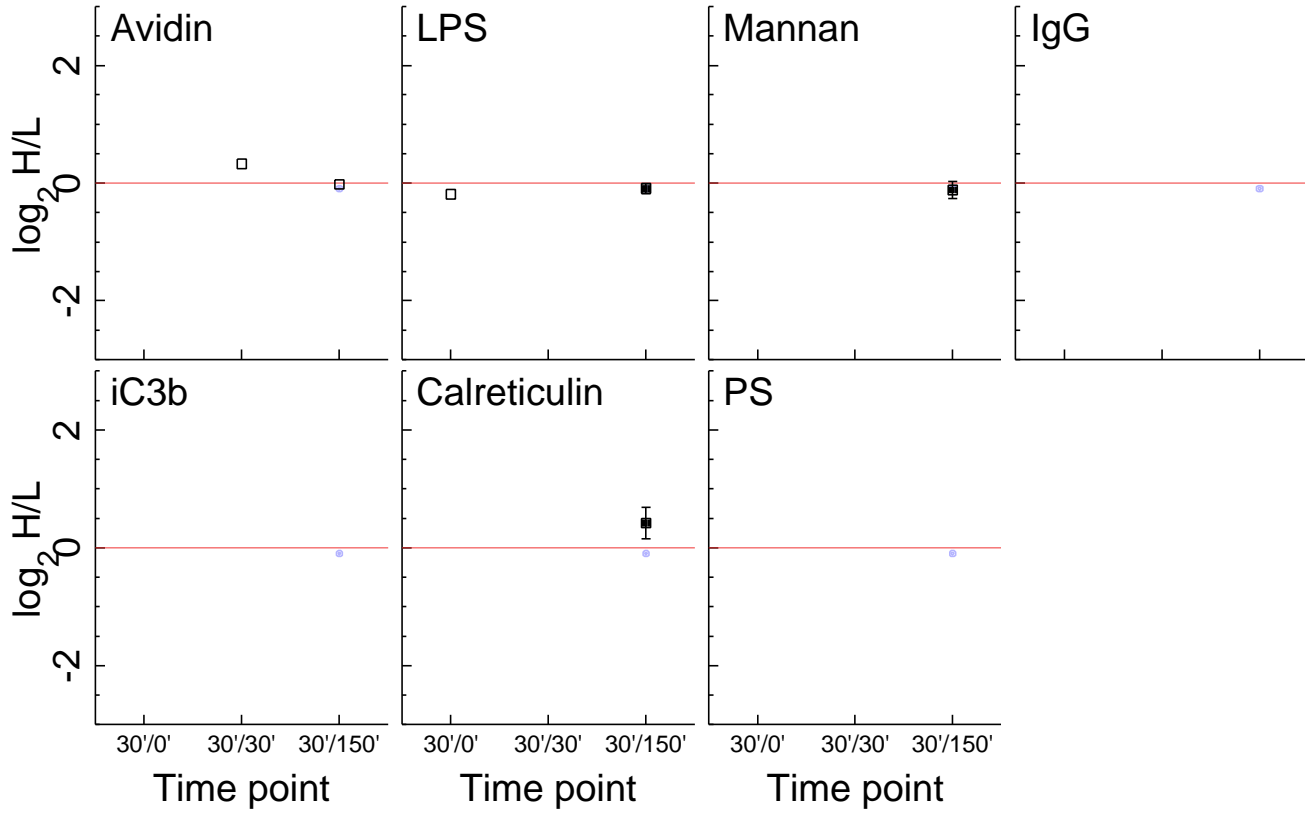



### serbp1 (Q9CY58)

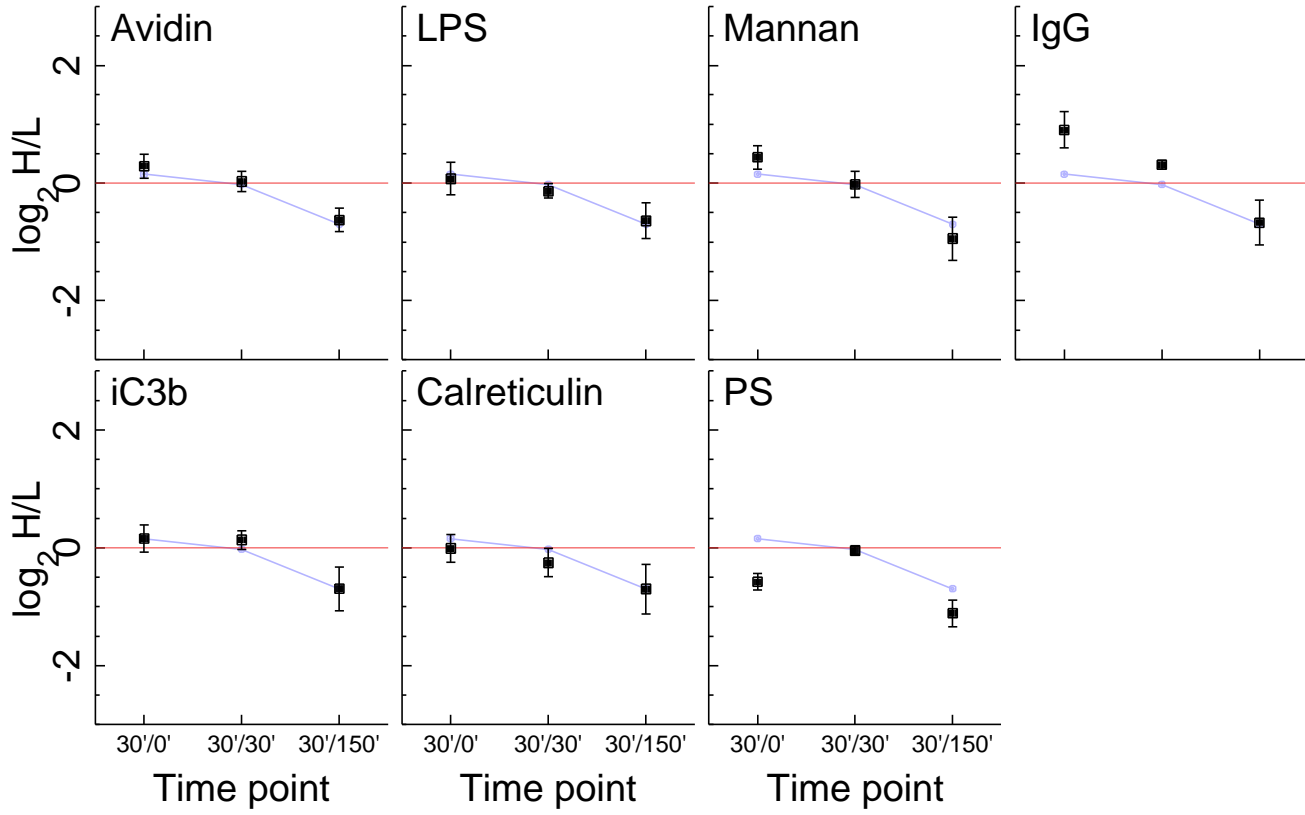

### serinc1 (Q9QZI8)

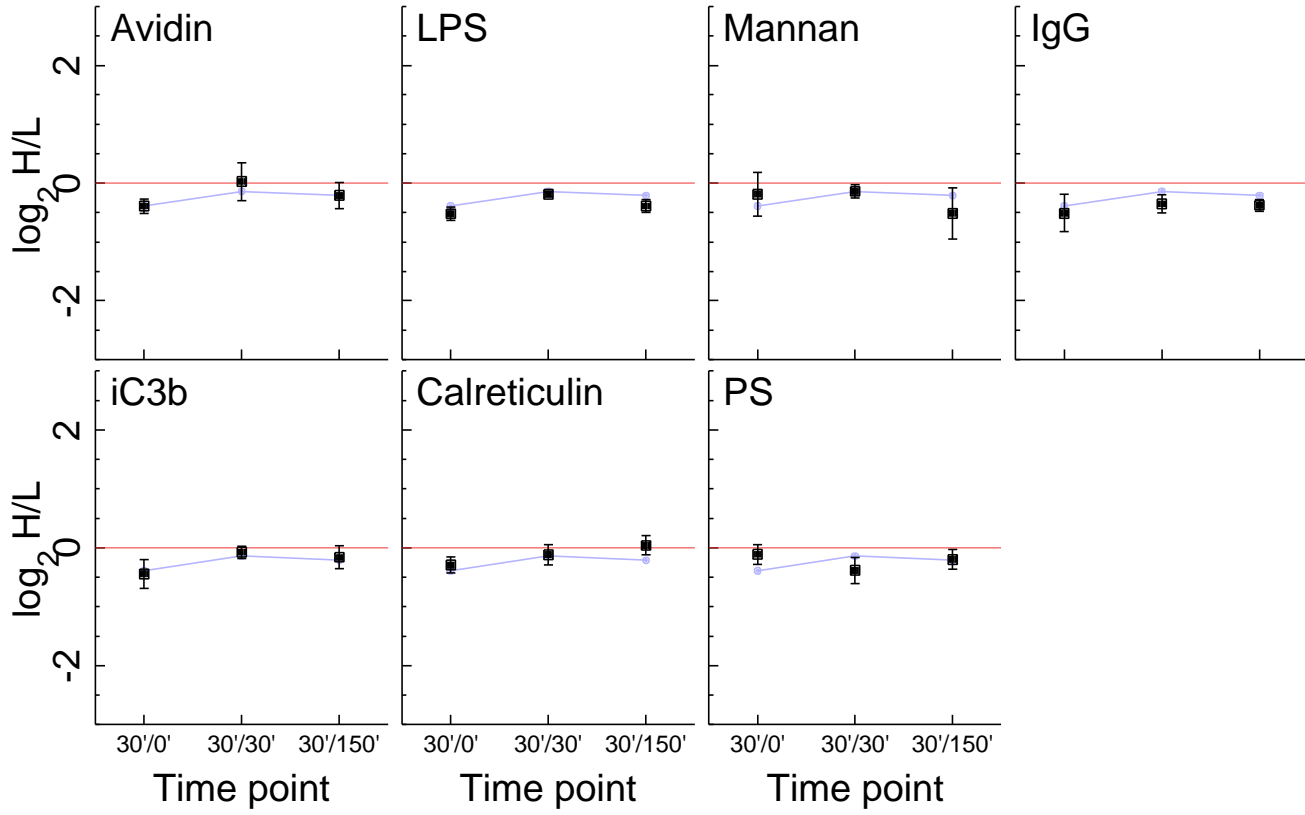

### serinc3 (Q9QZI9)

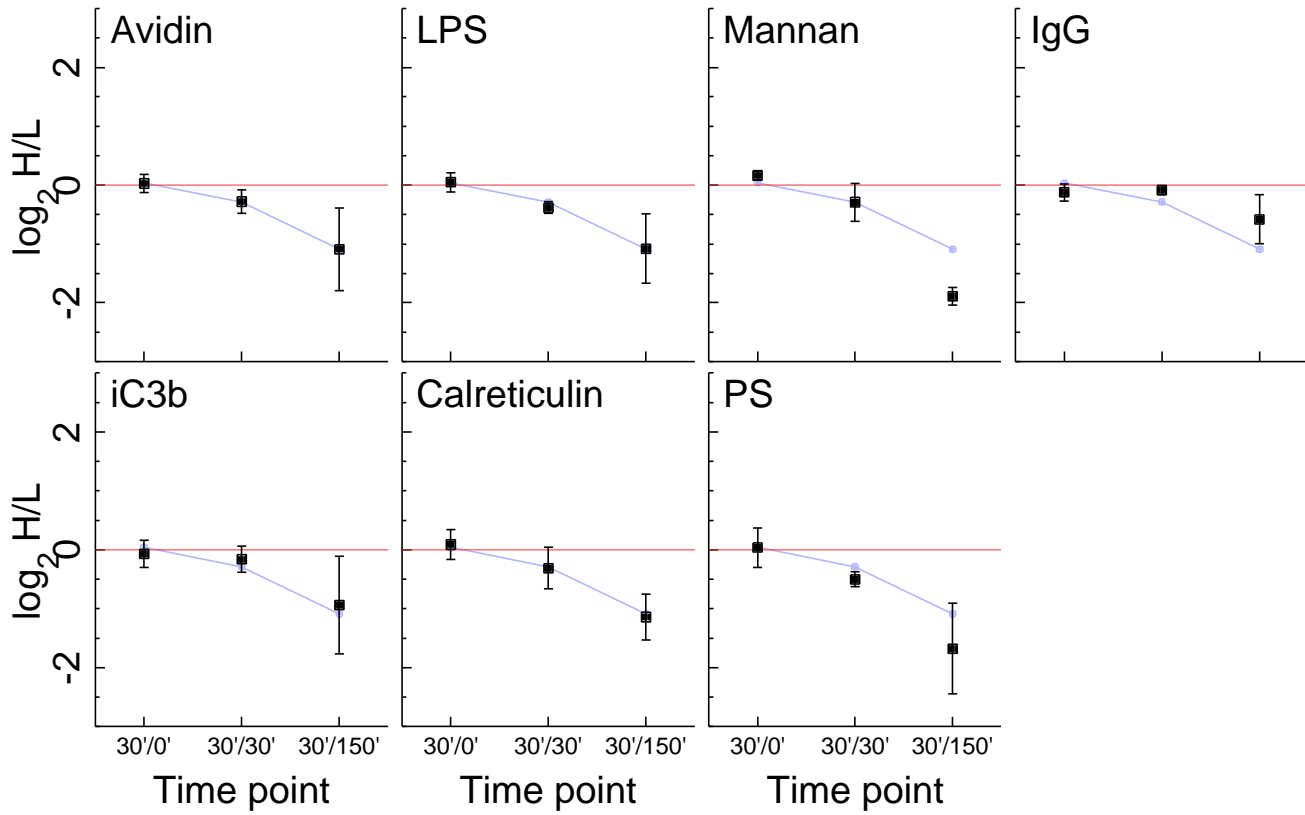

### serpinb6a (F8WIV2)

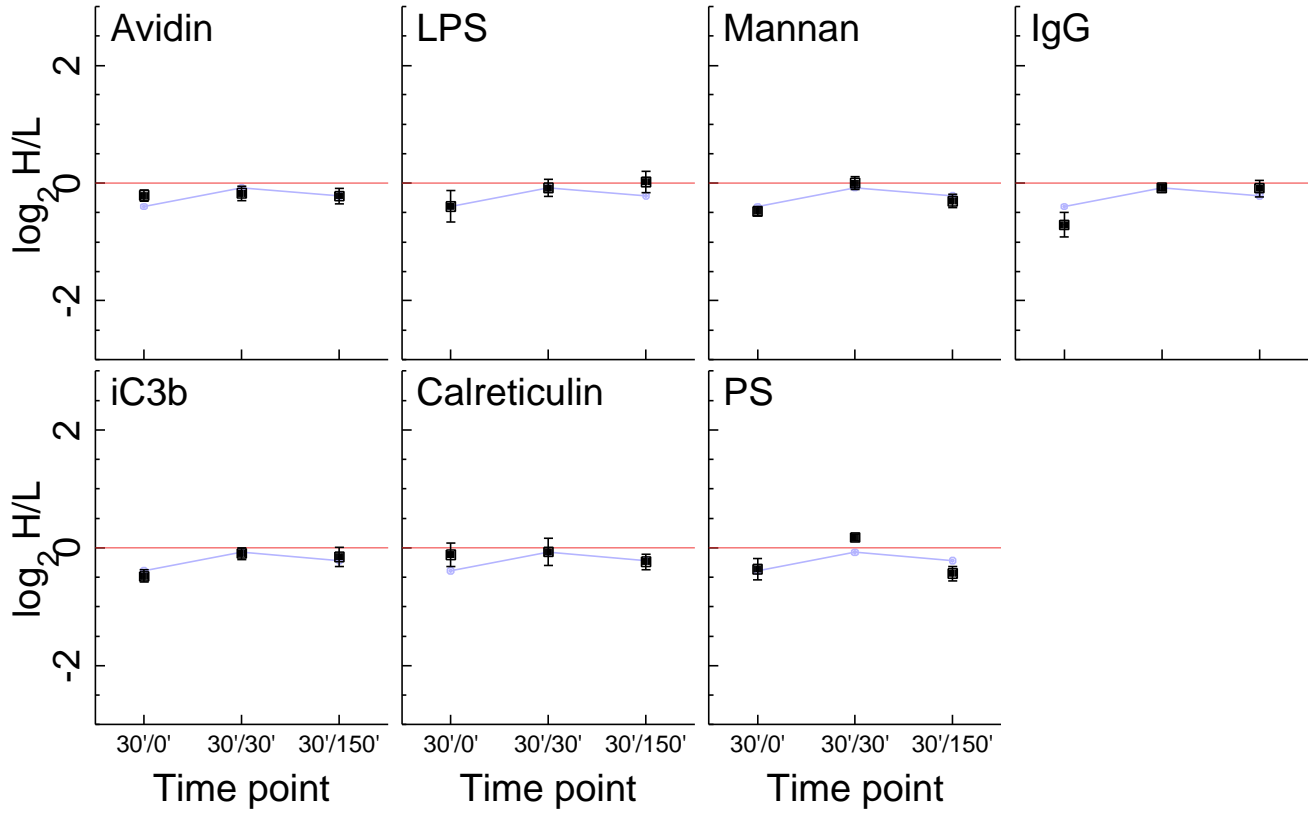

### serpinb6d (Q3UWK8)

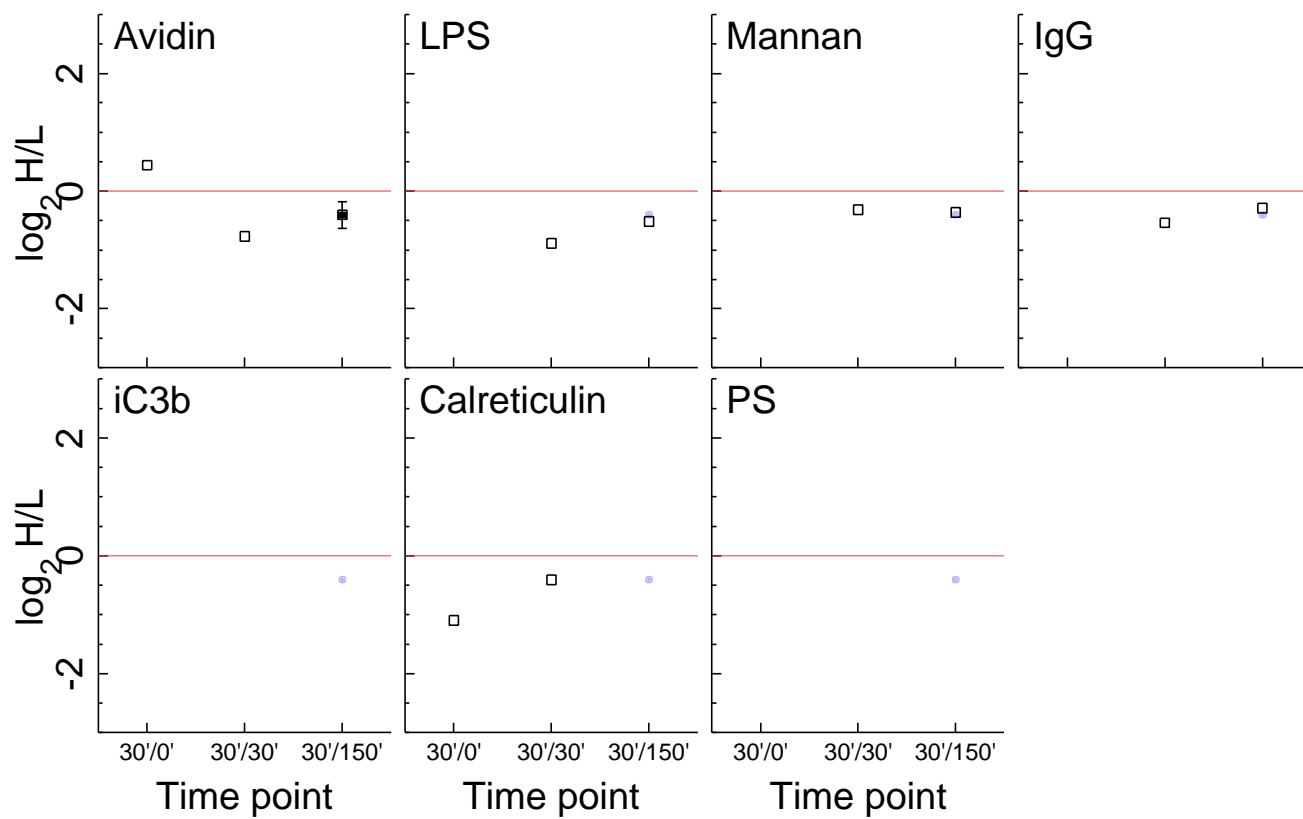

### serpinc1 (P32261)

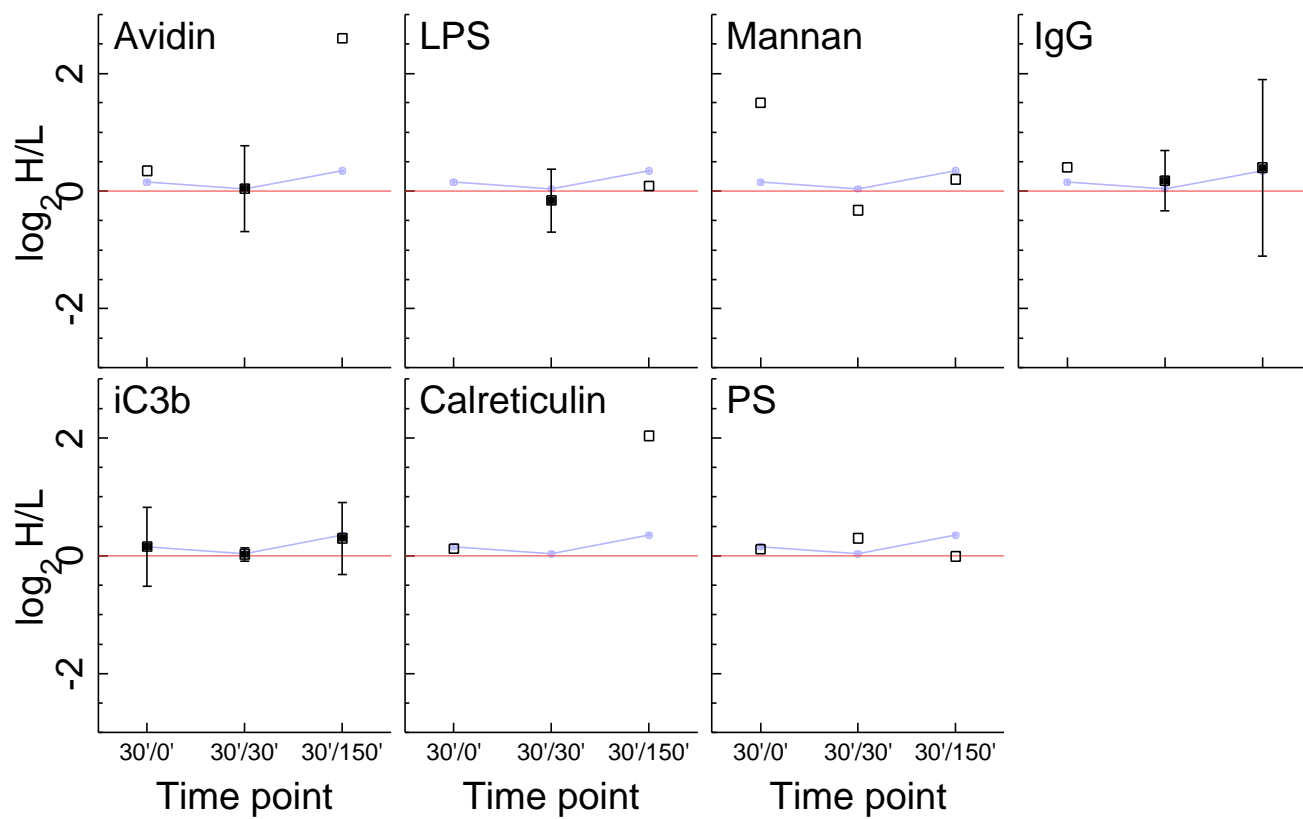

sf1 (E9Q4Q2)

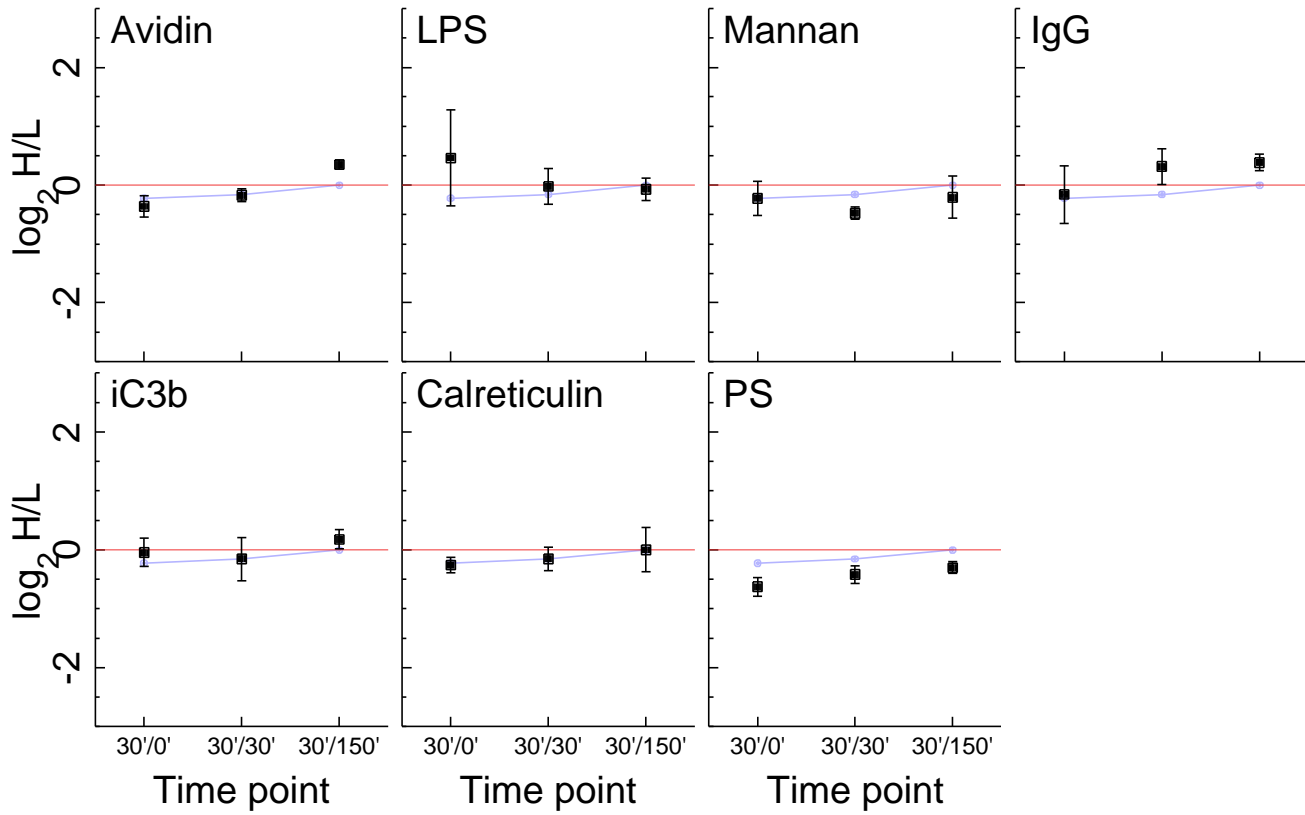

### sf3b4 (Q8QZY9)

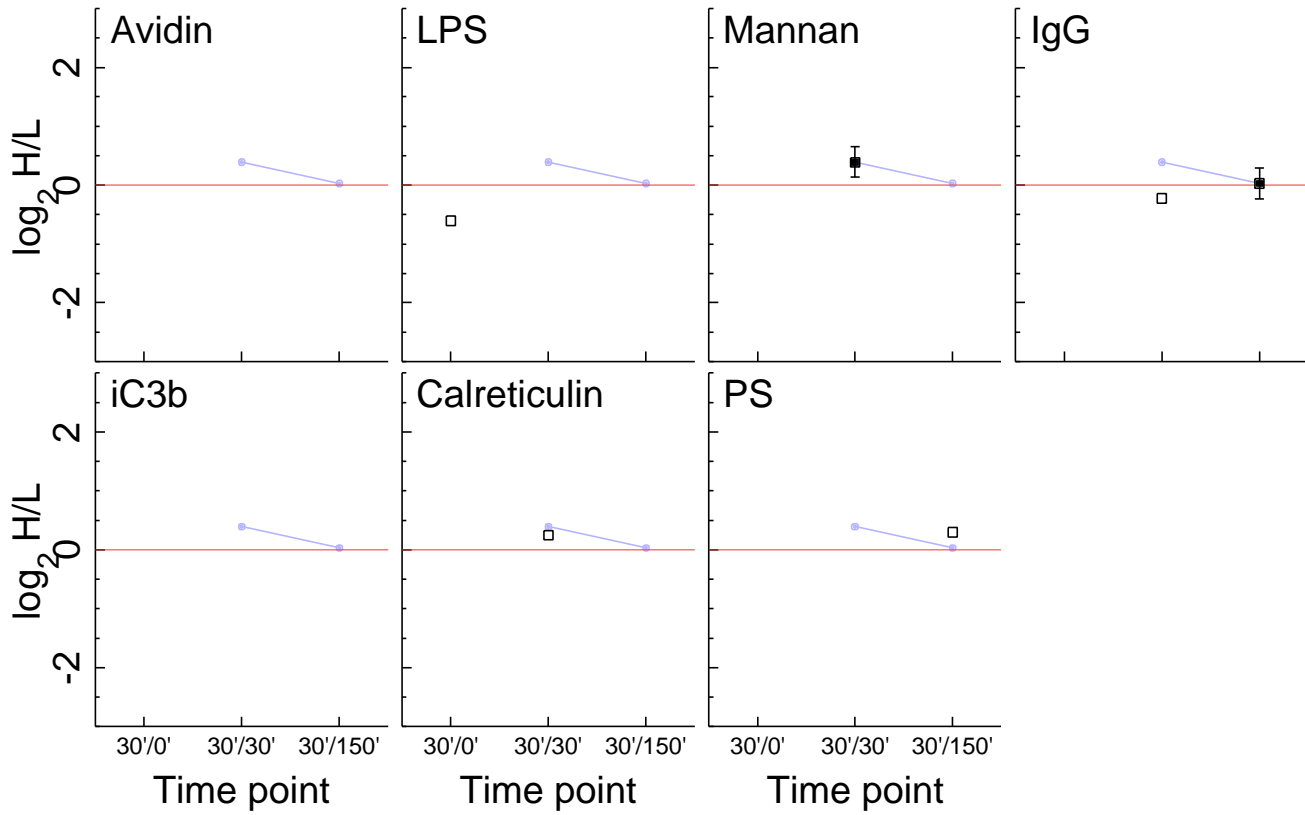



sfn (O70456)

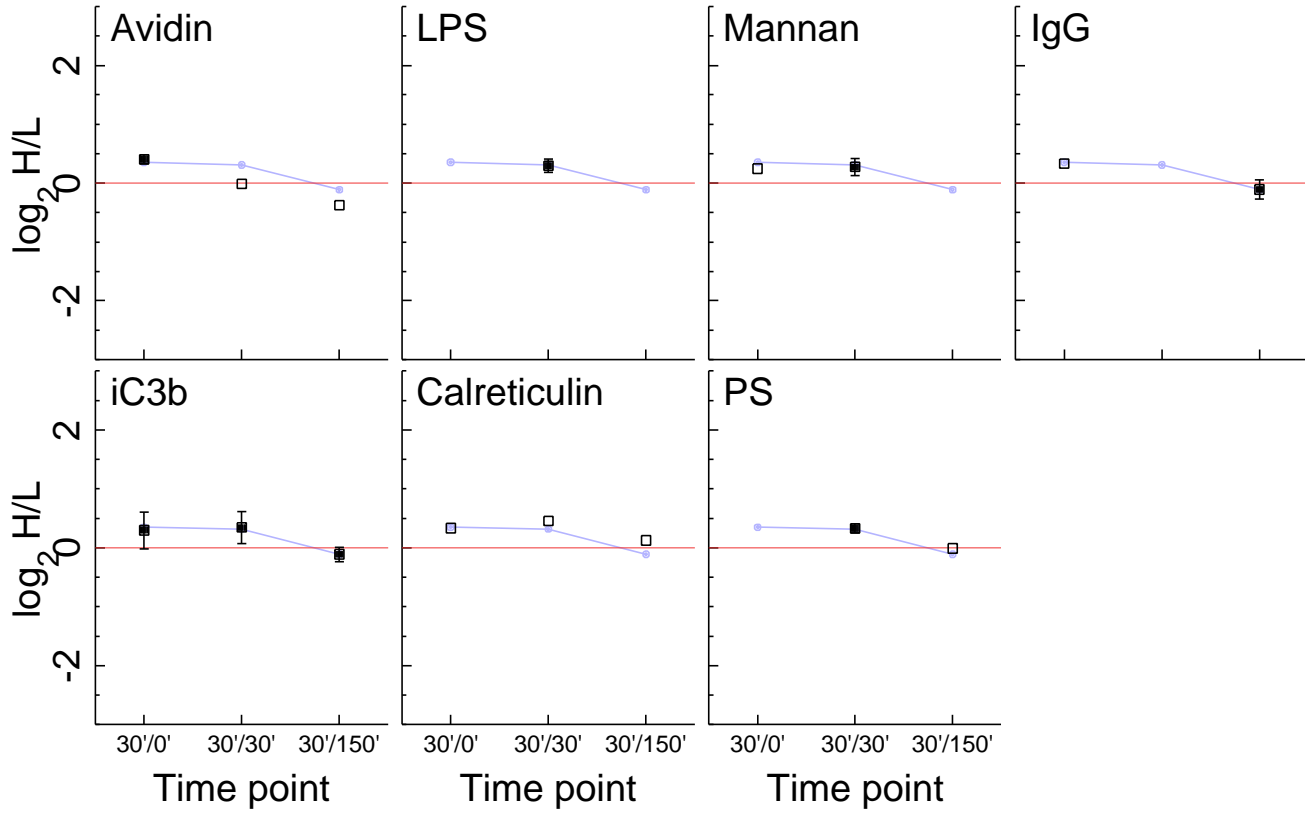

sfpq (Q8VIJ6)

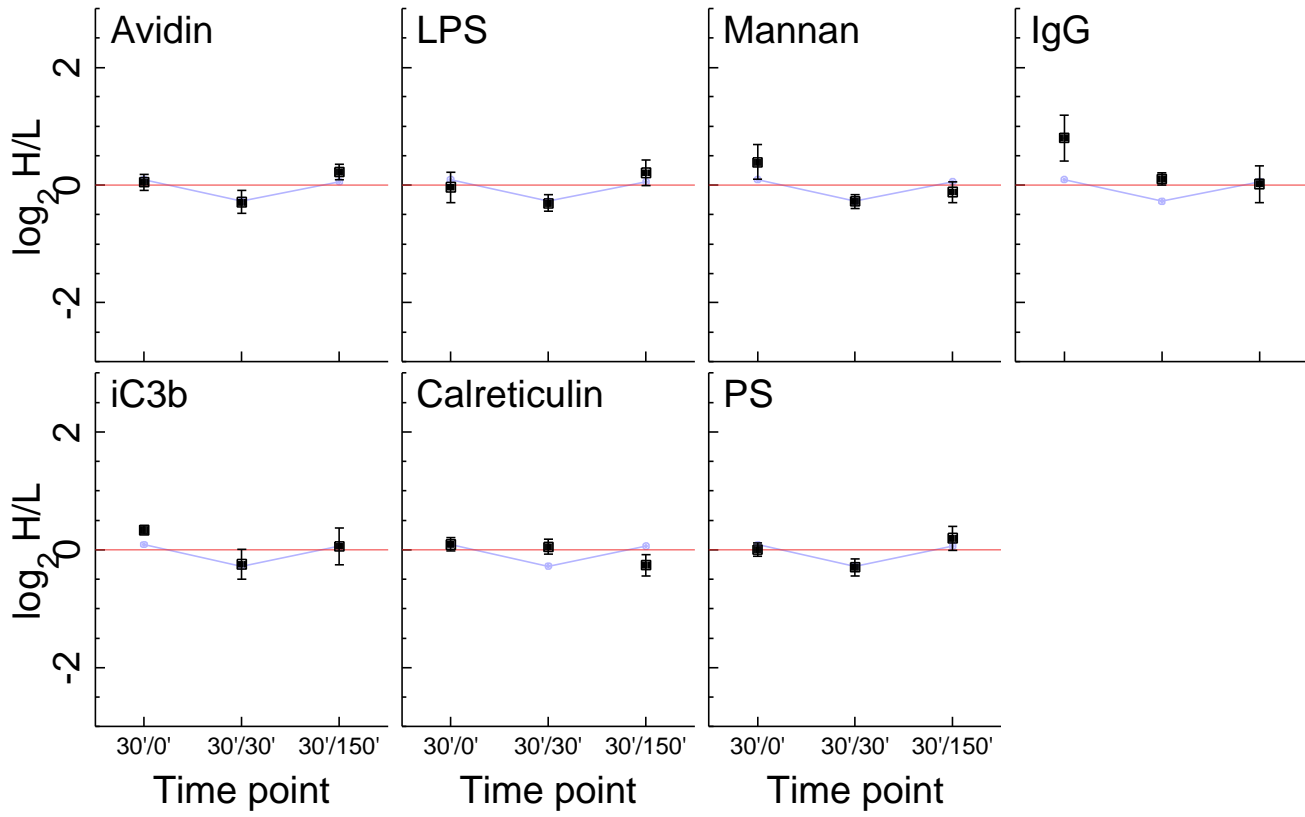

sft2d2 (Q8VD57)

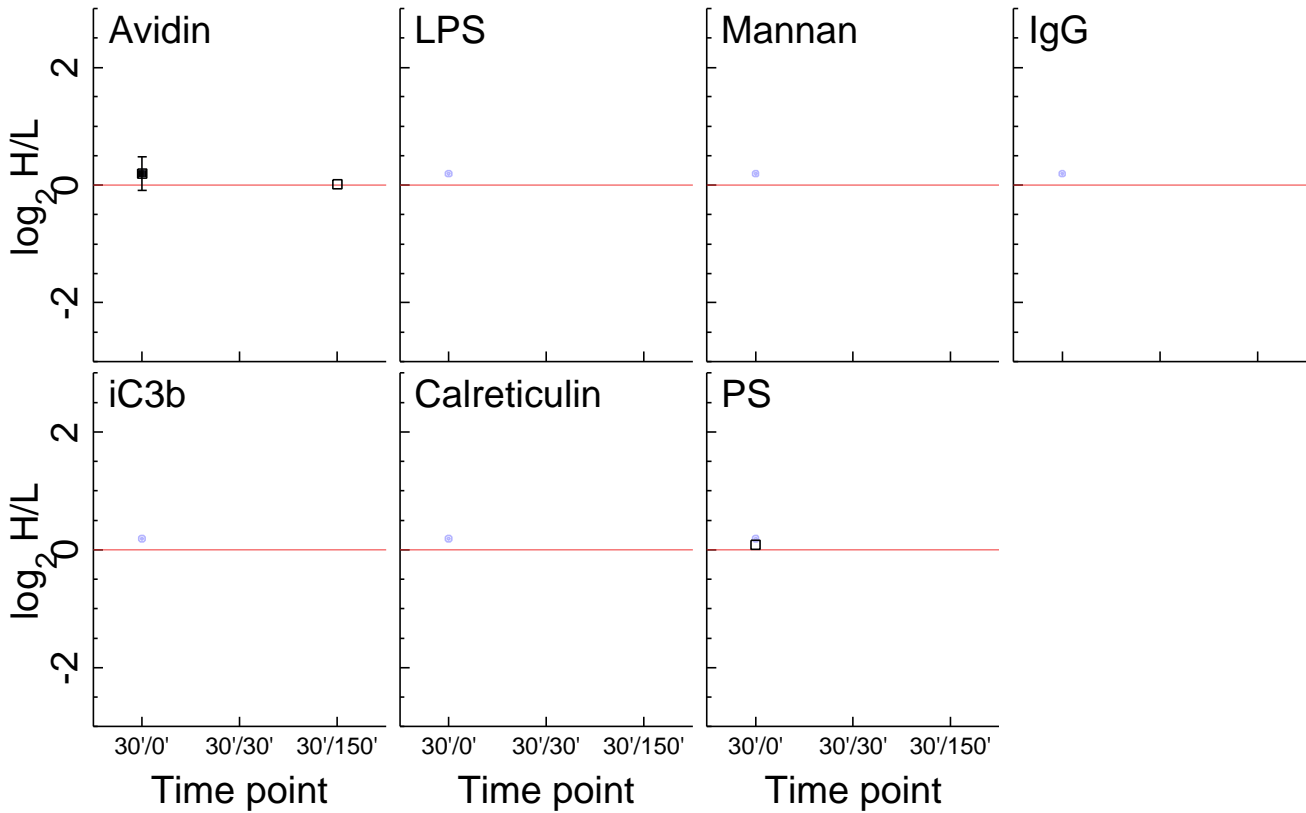

### sfxn1 (Q99JR1)

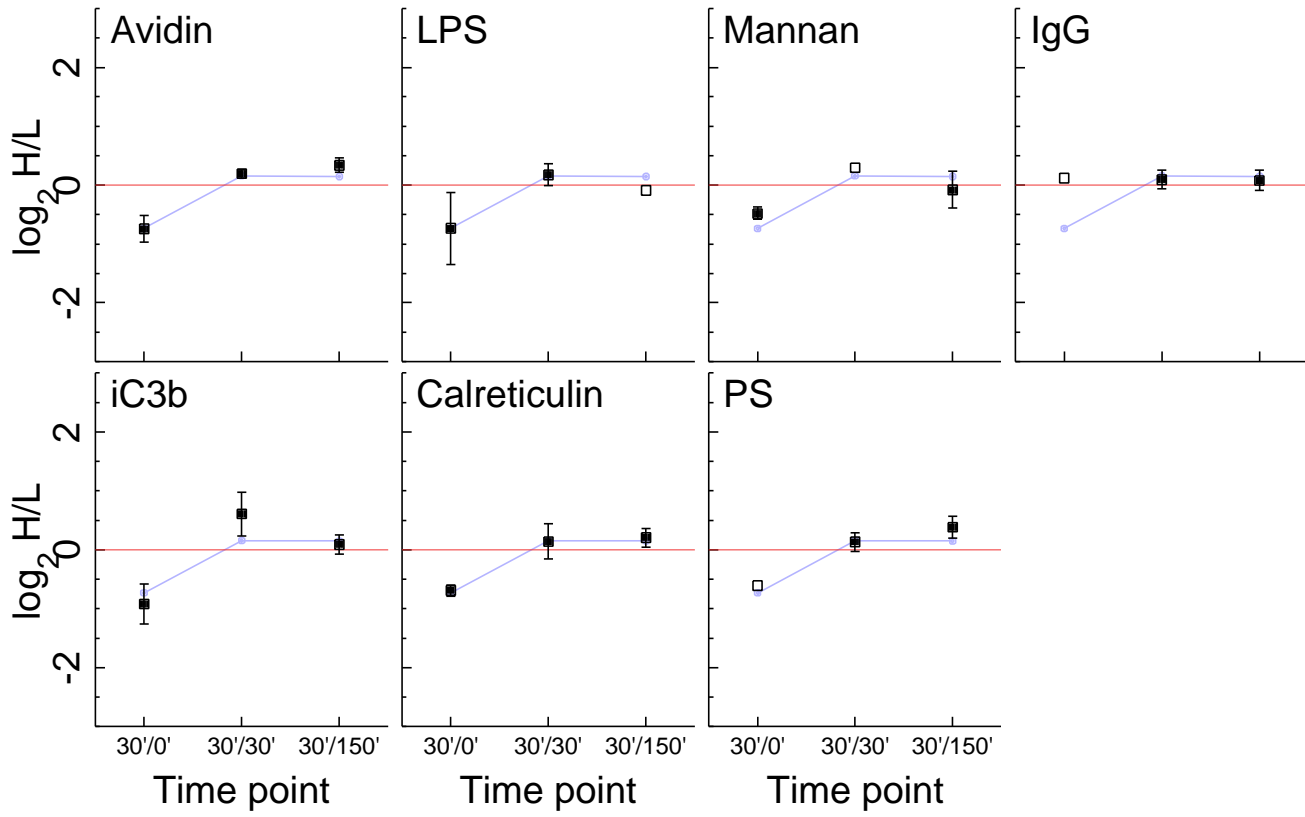

### sfxn3 (Q91V61)

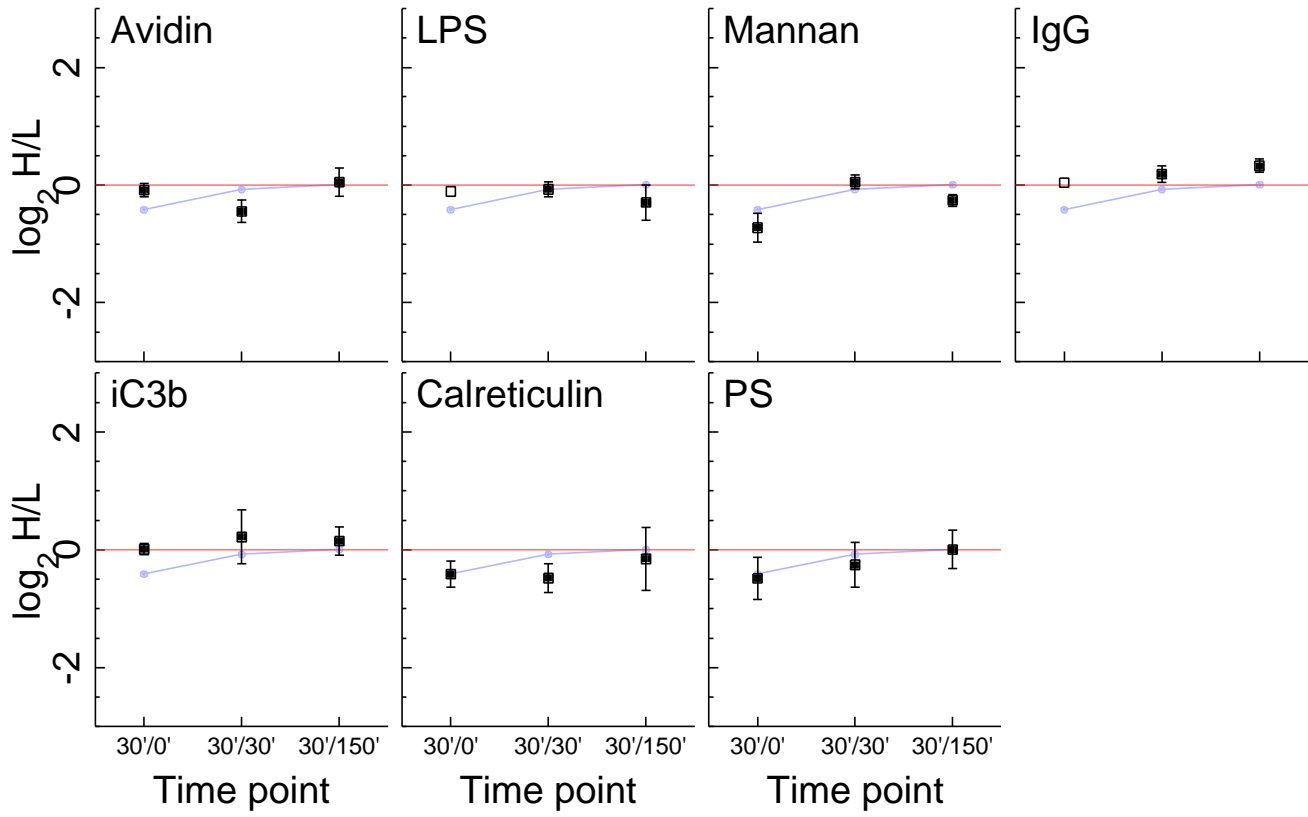

### sgpl1 (Q8R0X7)

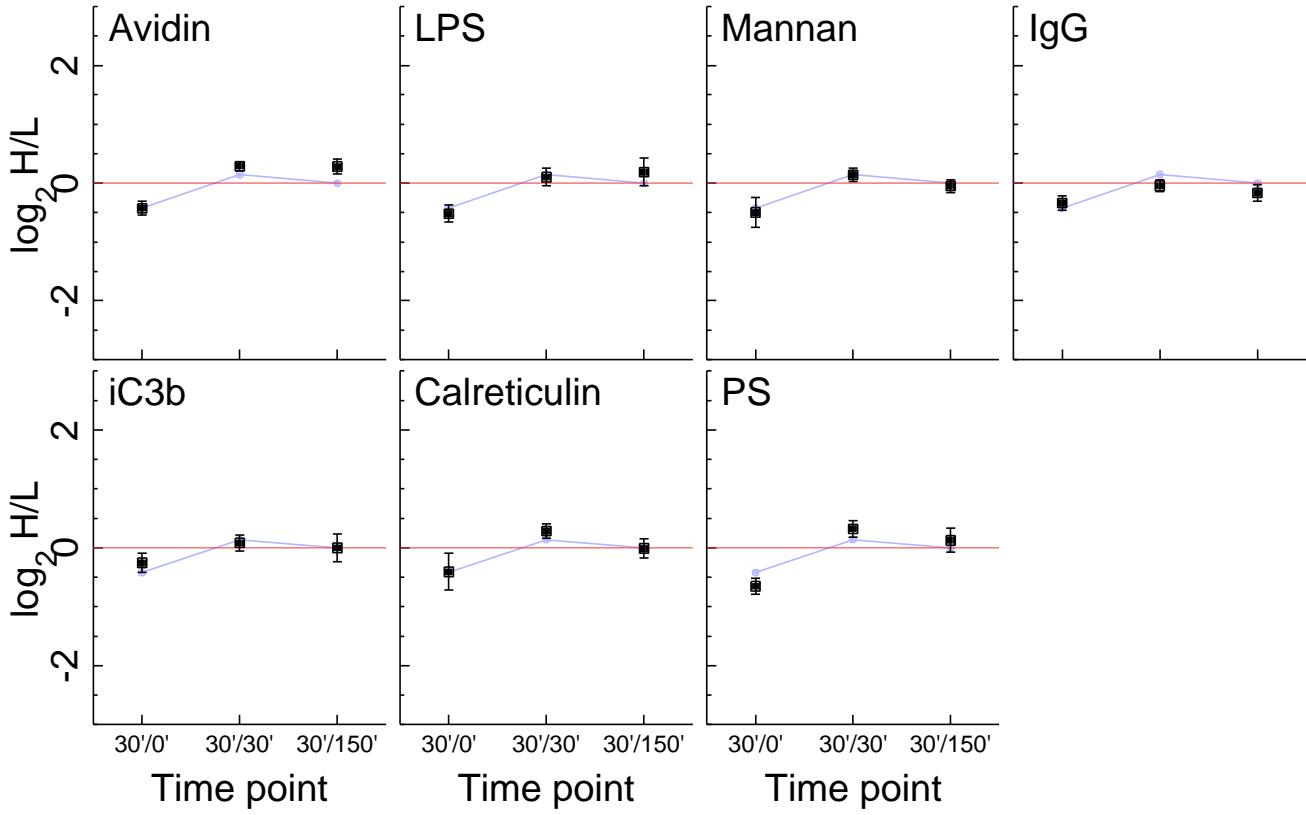

### sh3bgrl3 (Q91VW3)

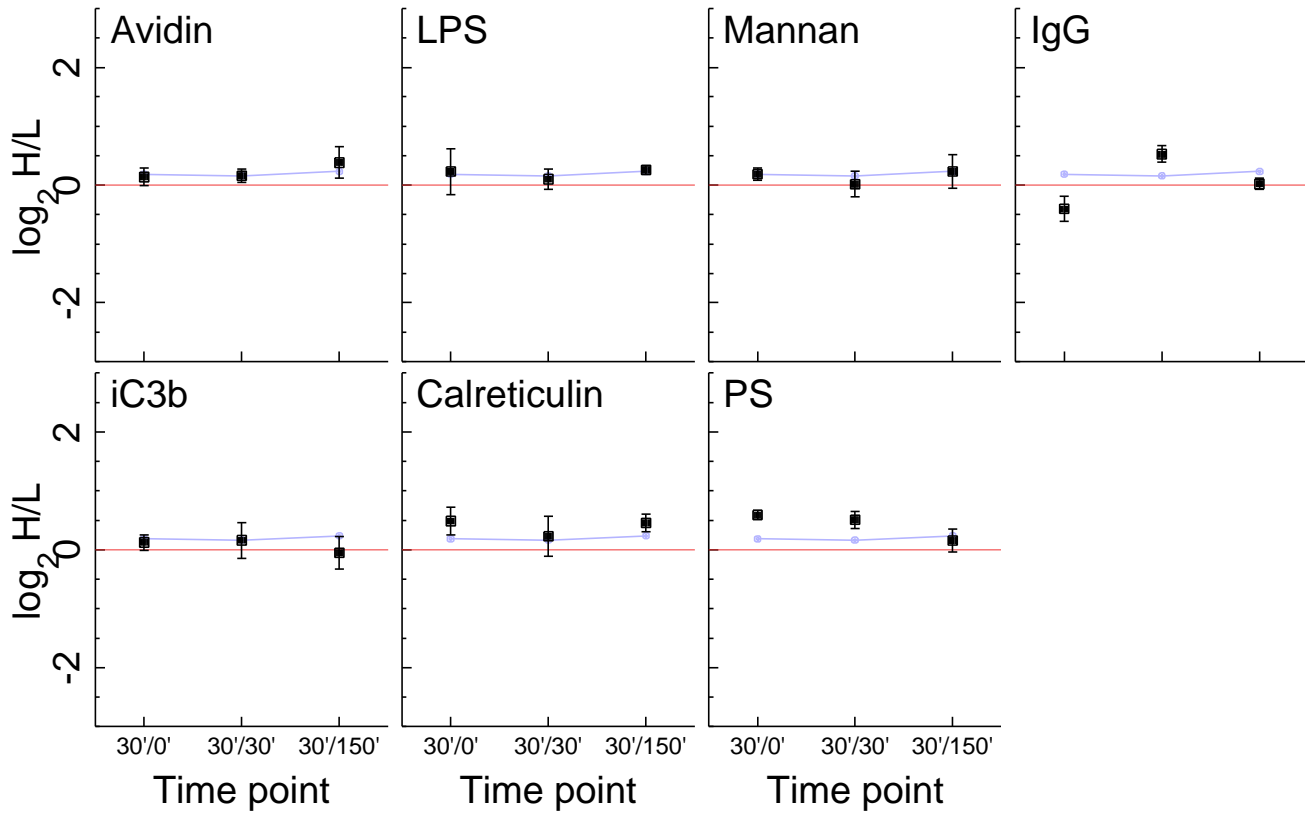

### sh3bp1 (A2A5V4)

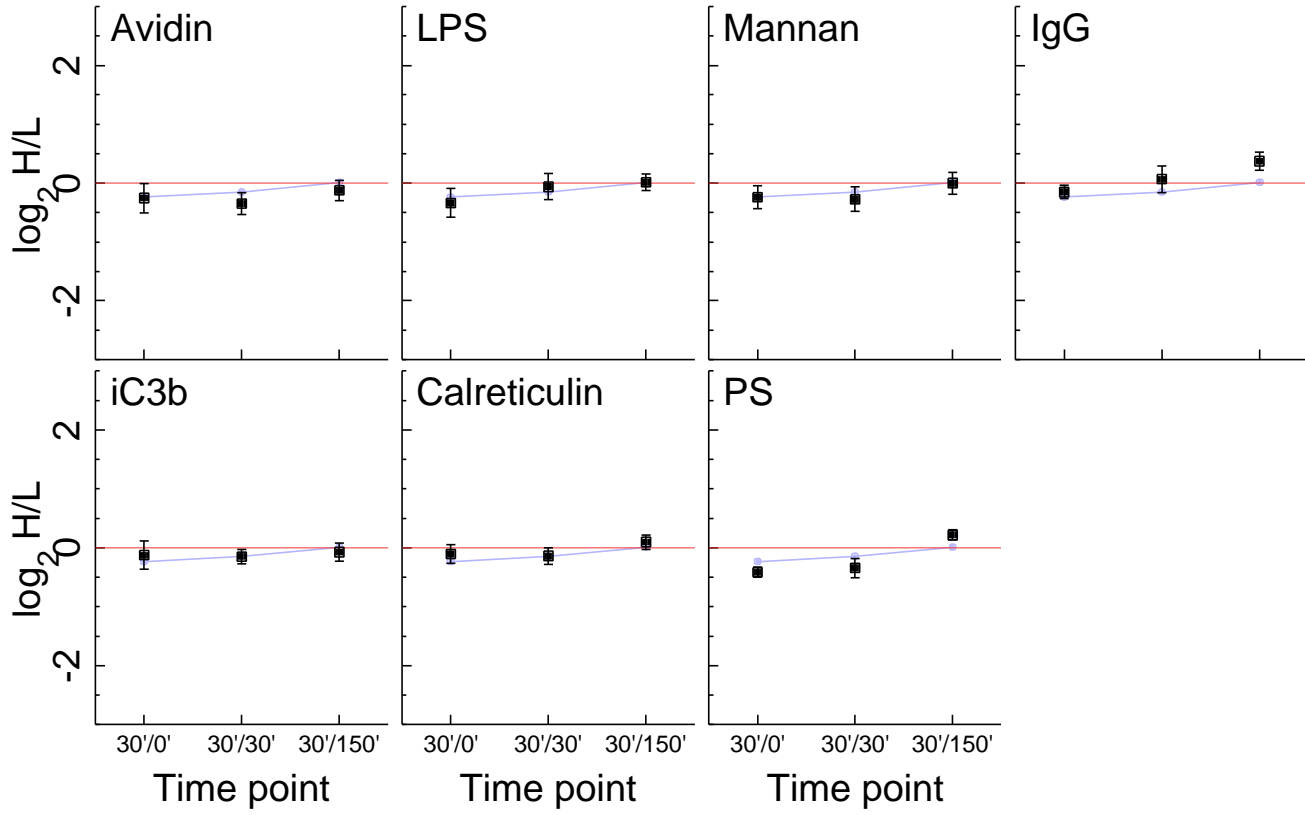



### sh3bp2 (E9QJU7)

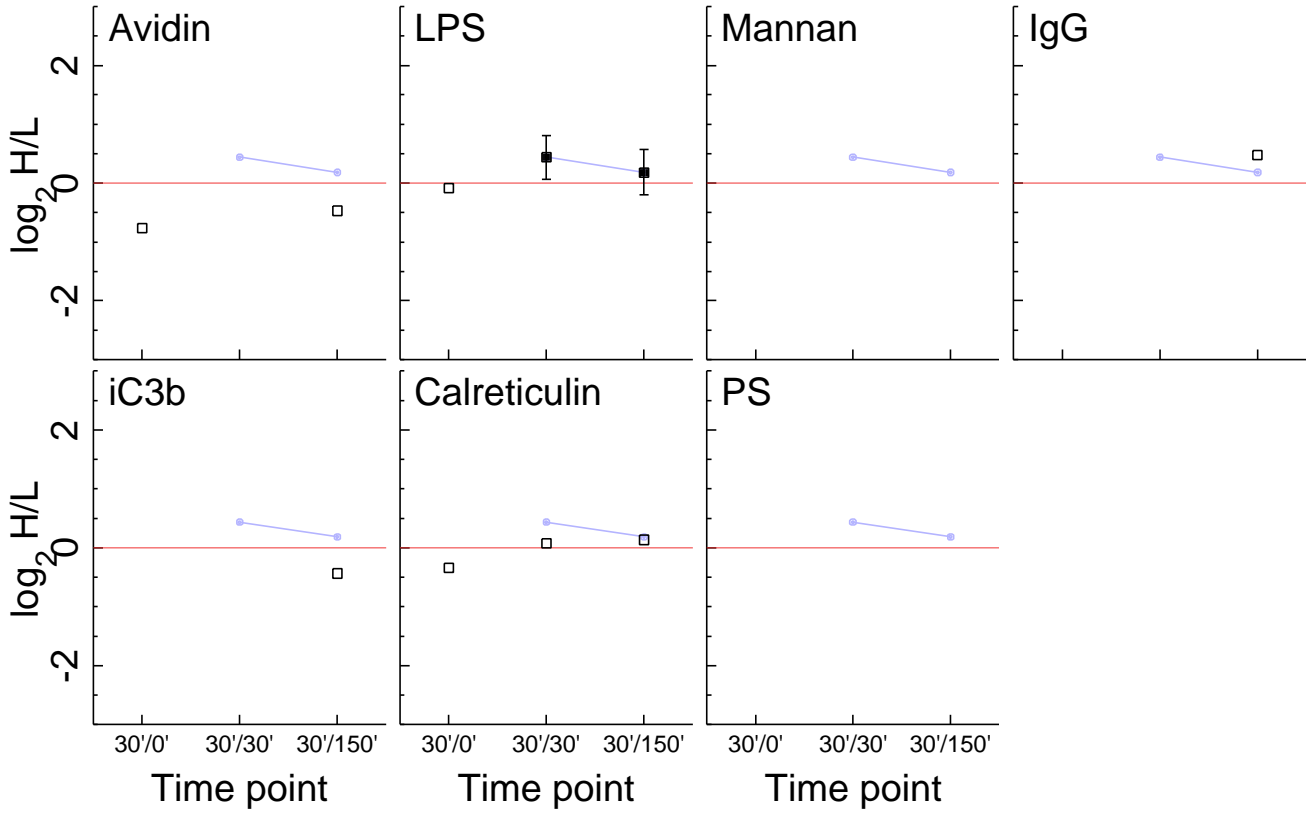

sh3gl1 (Q62419)

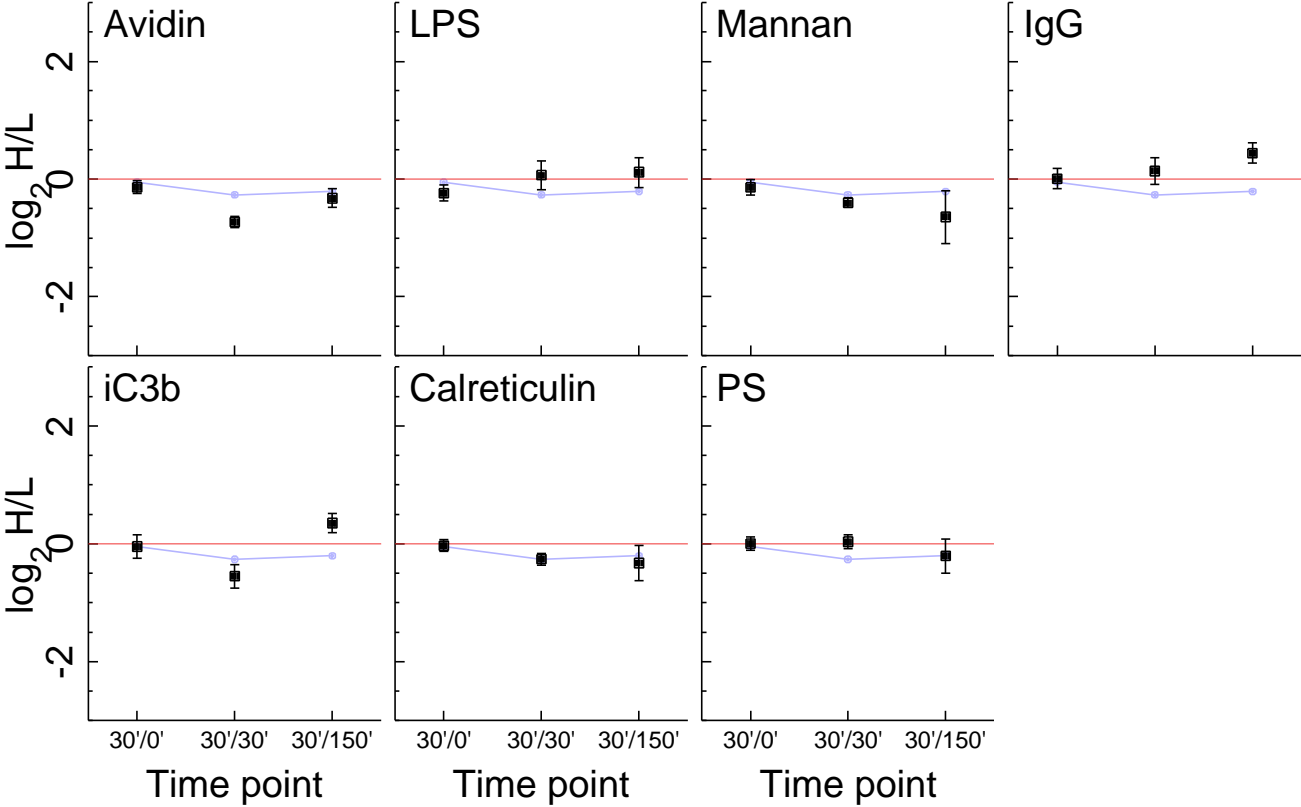

### sh3glb1 (Q9JK48)

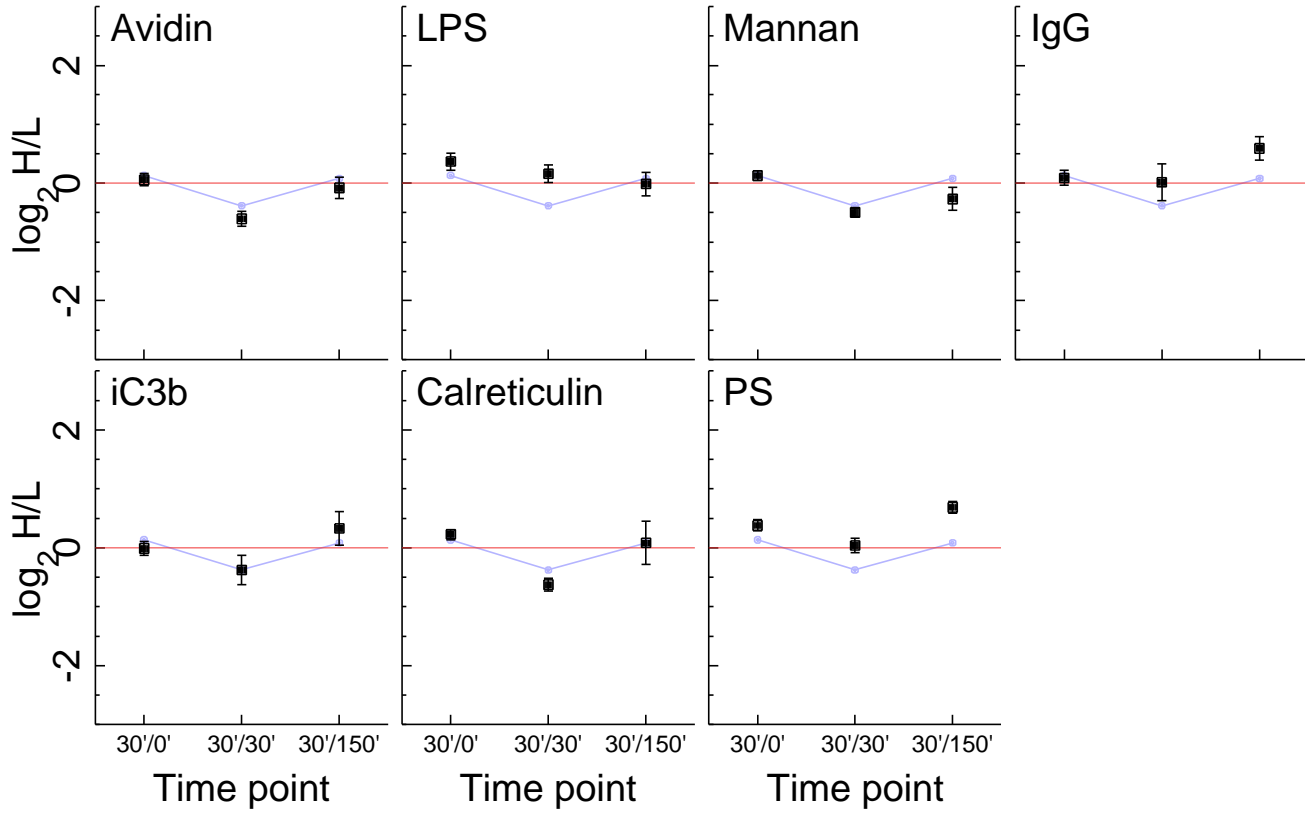

### sh3glb2 (A2AWI7)

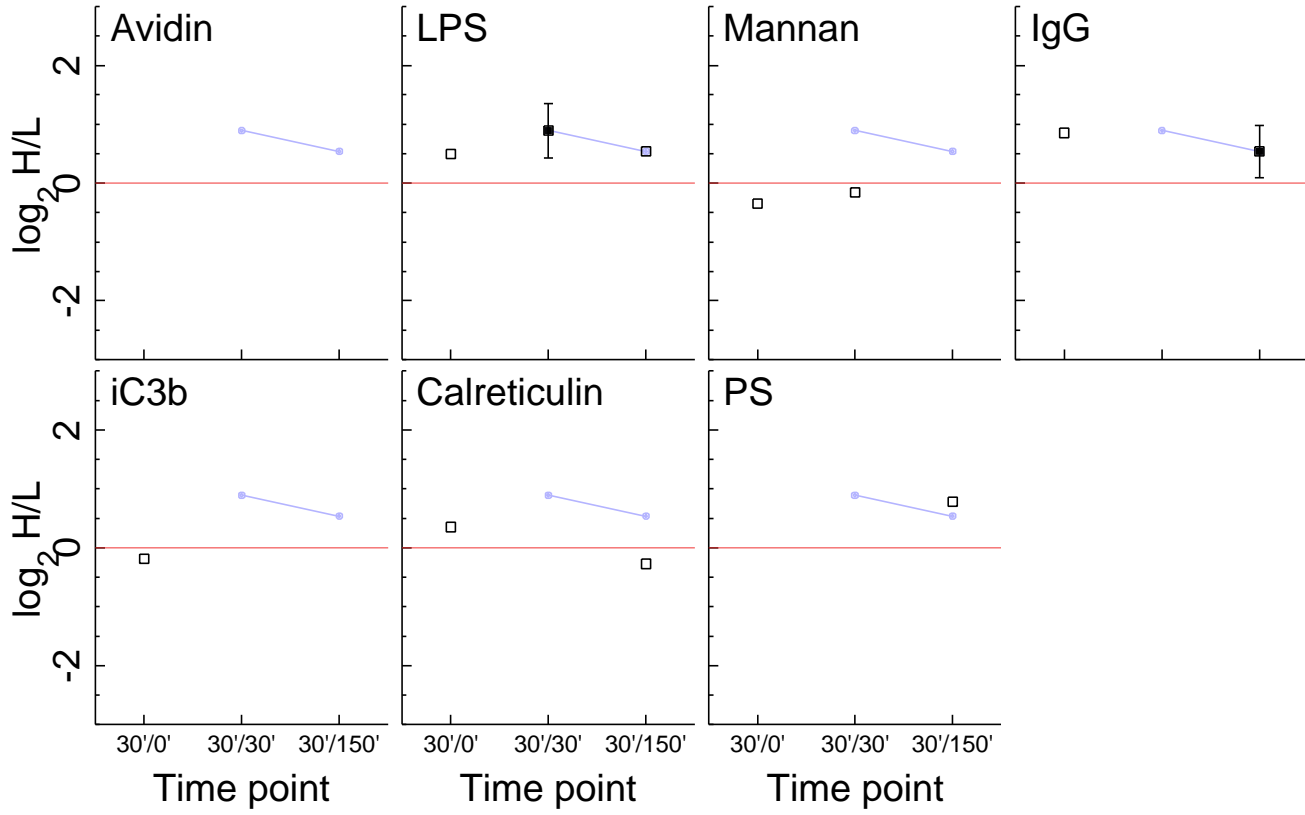

### sh3kbp1 (Q8R550)

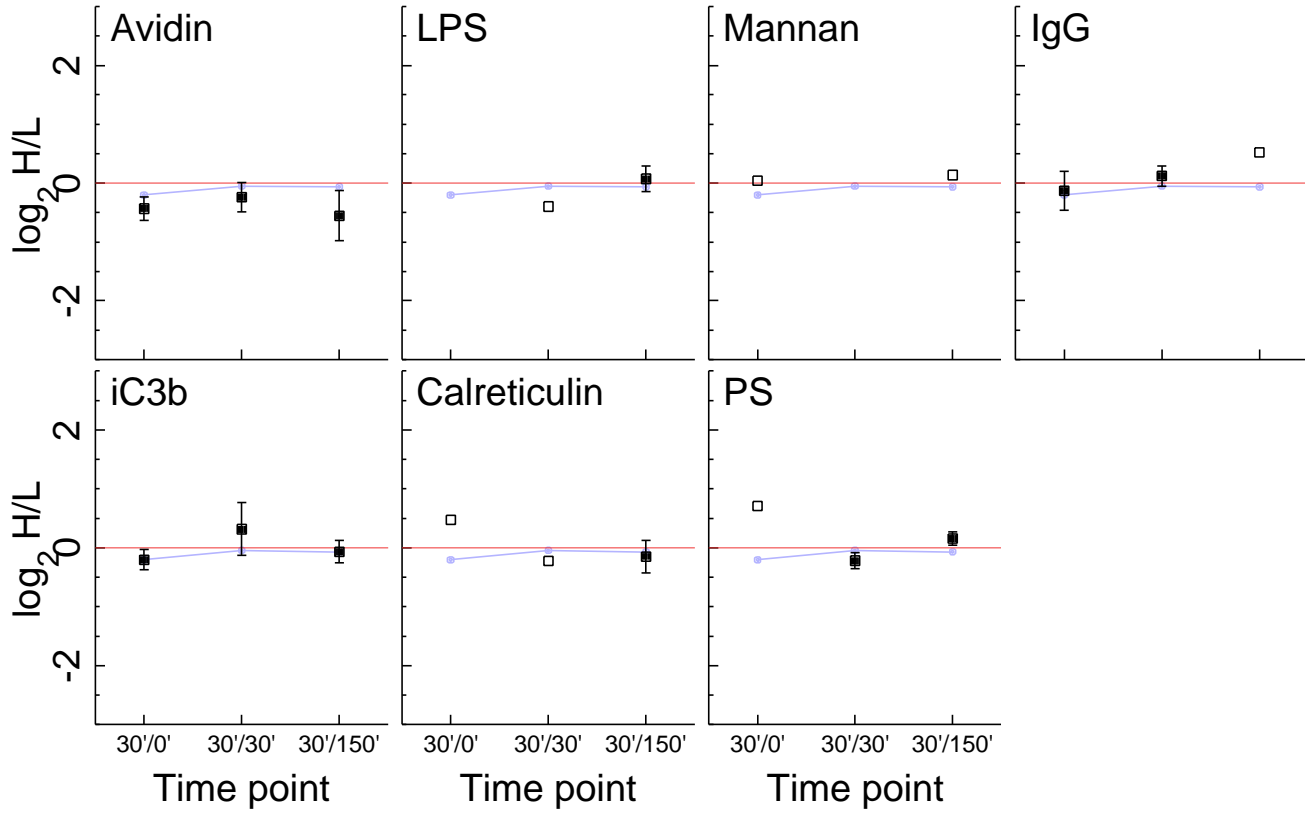

### sh3pxd2b (A2AAY5)

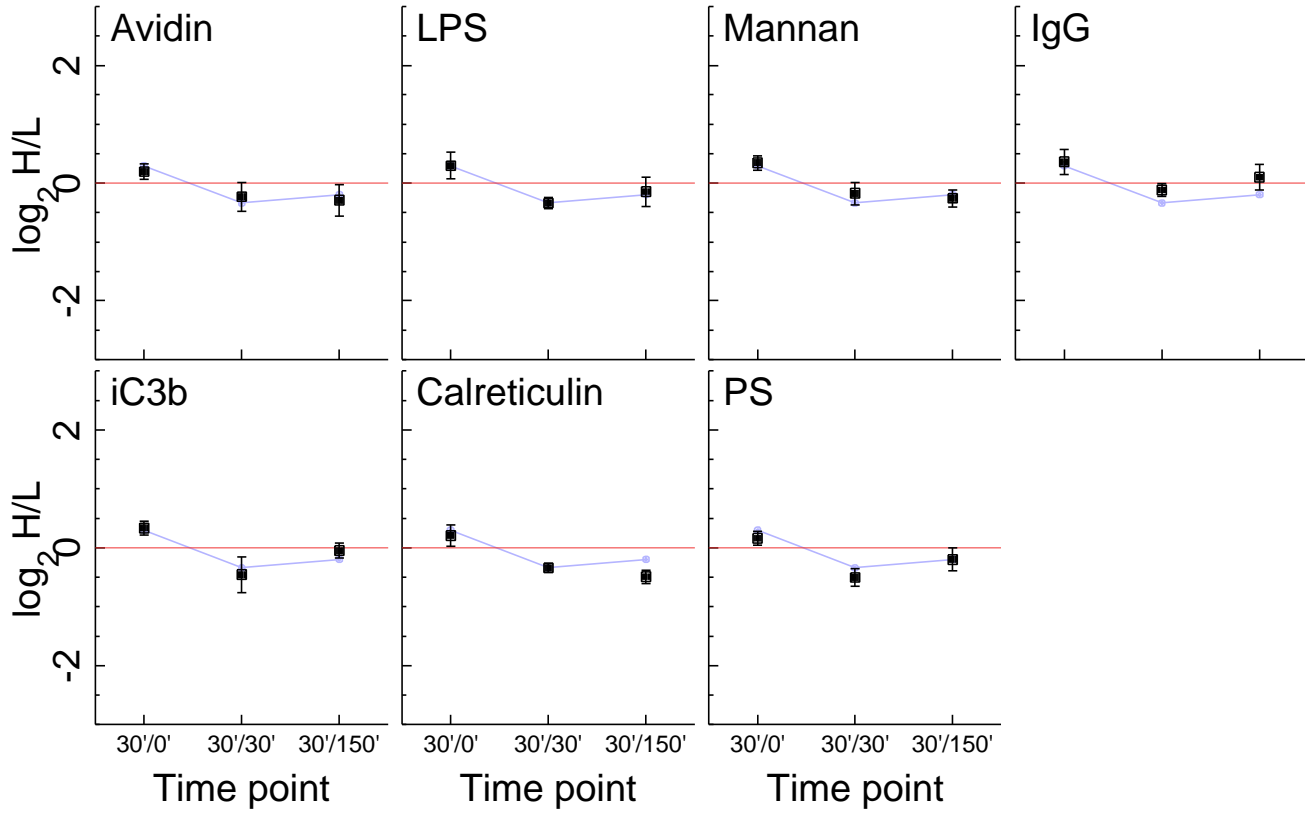

shmt2 (Q9CZN7)

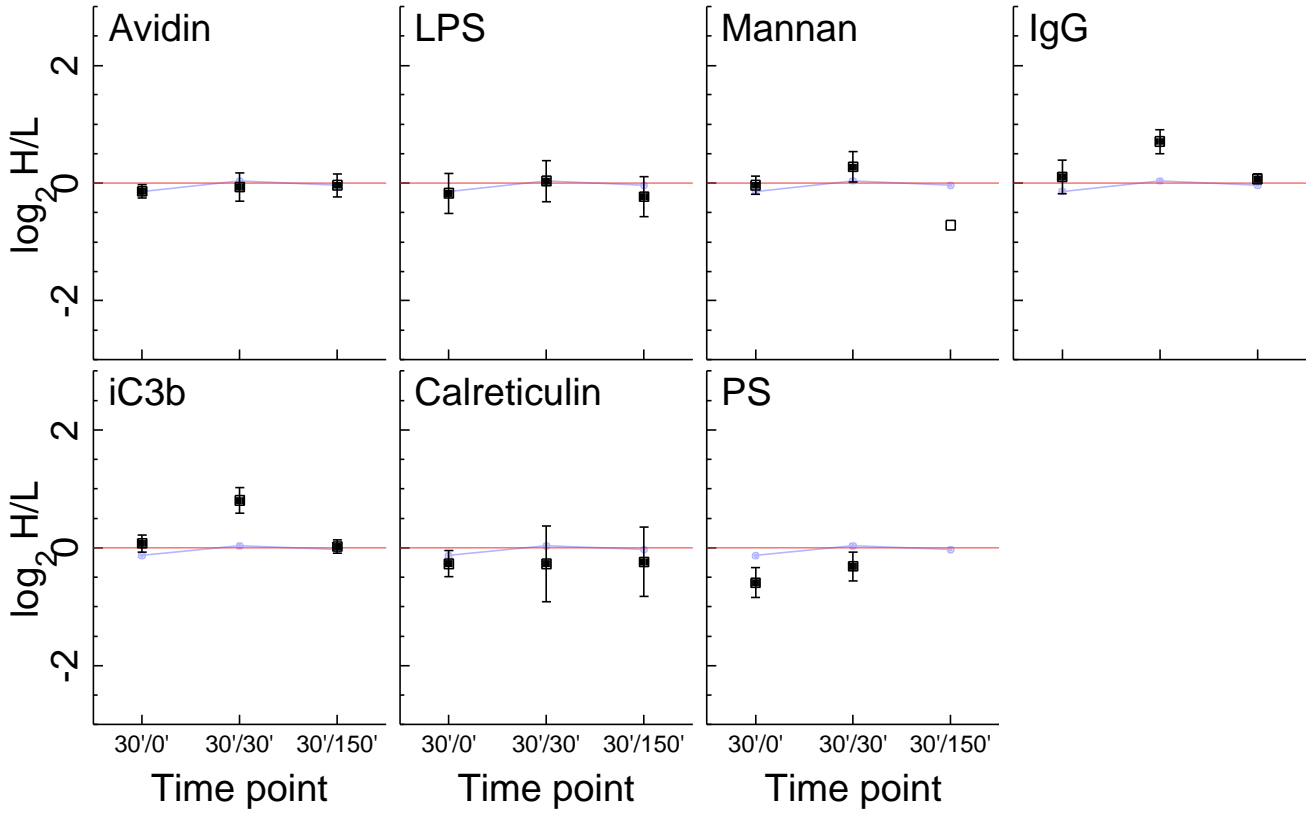

siae (P70665)

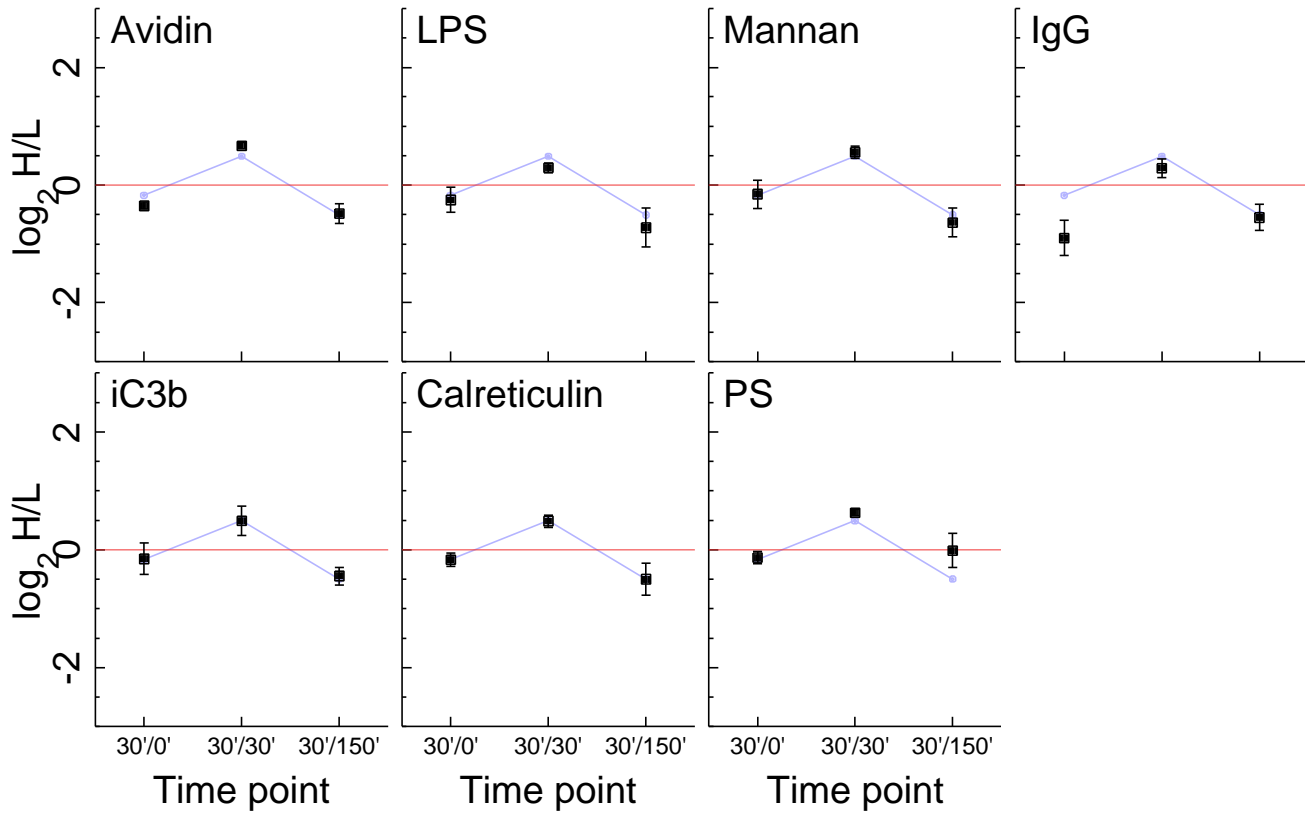



### sidt2 (Q8CIF6)

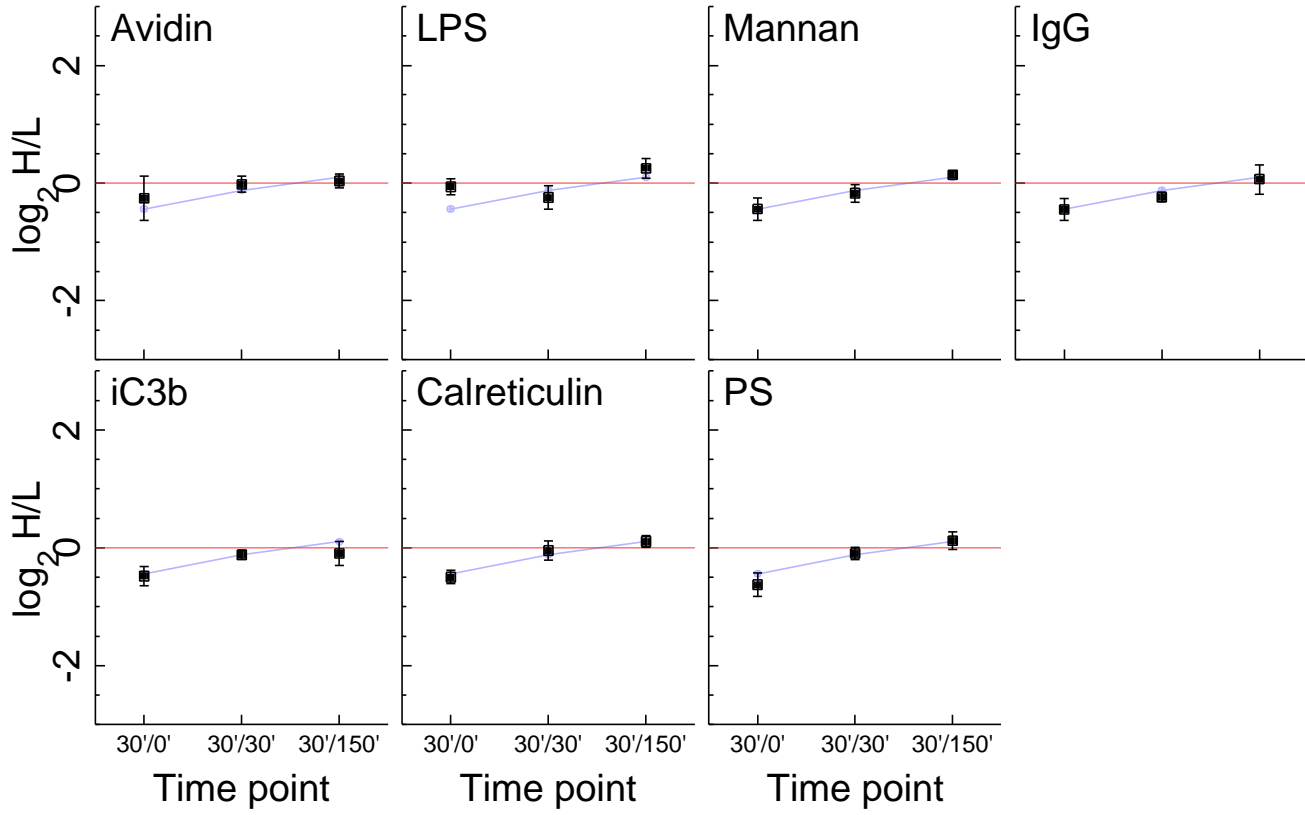

### siglec1 (G3X8X6)

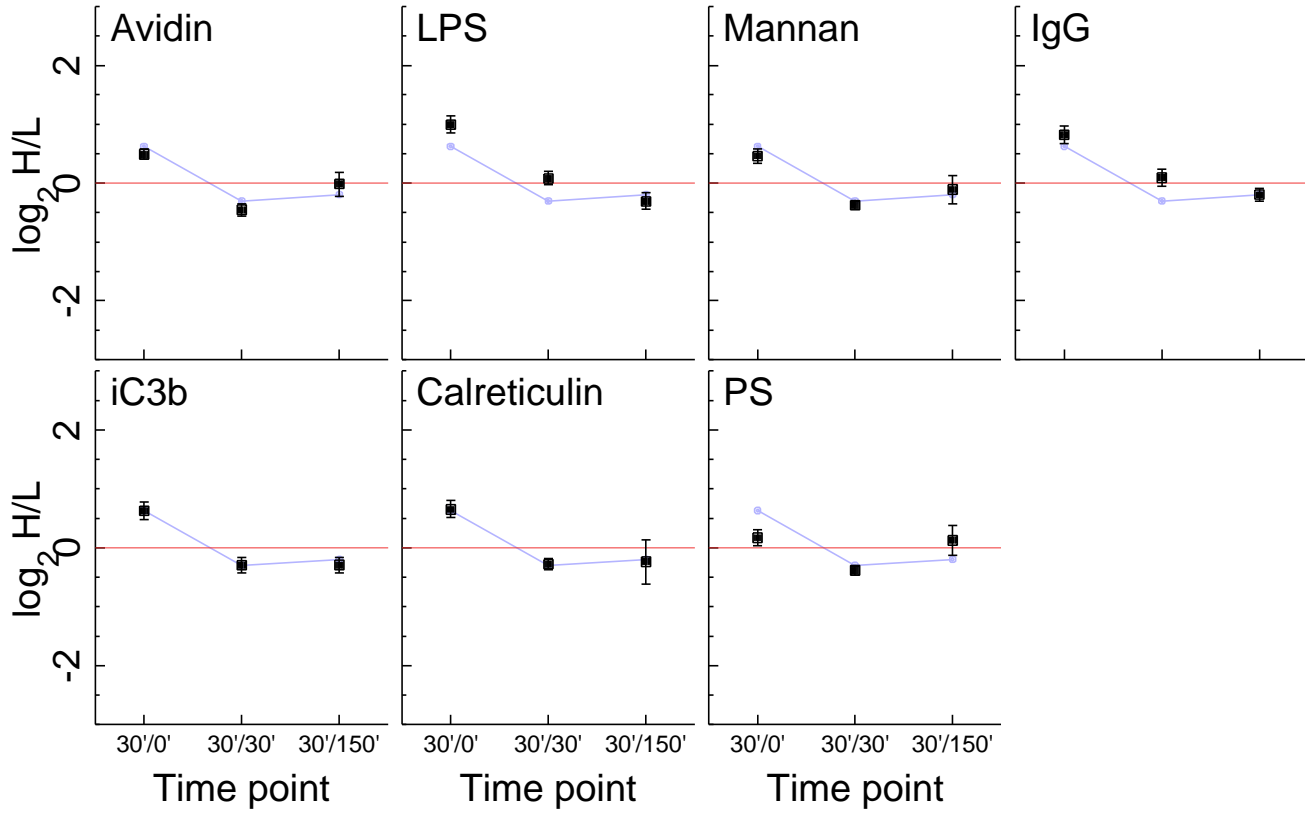

### sigmar1 (O55242)

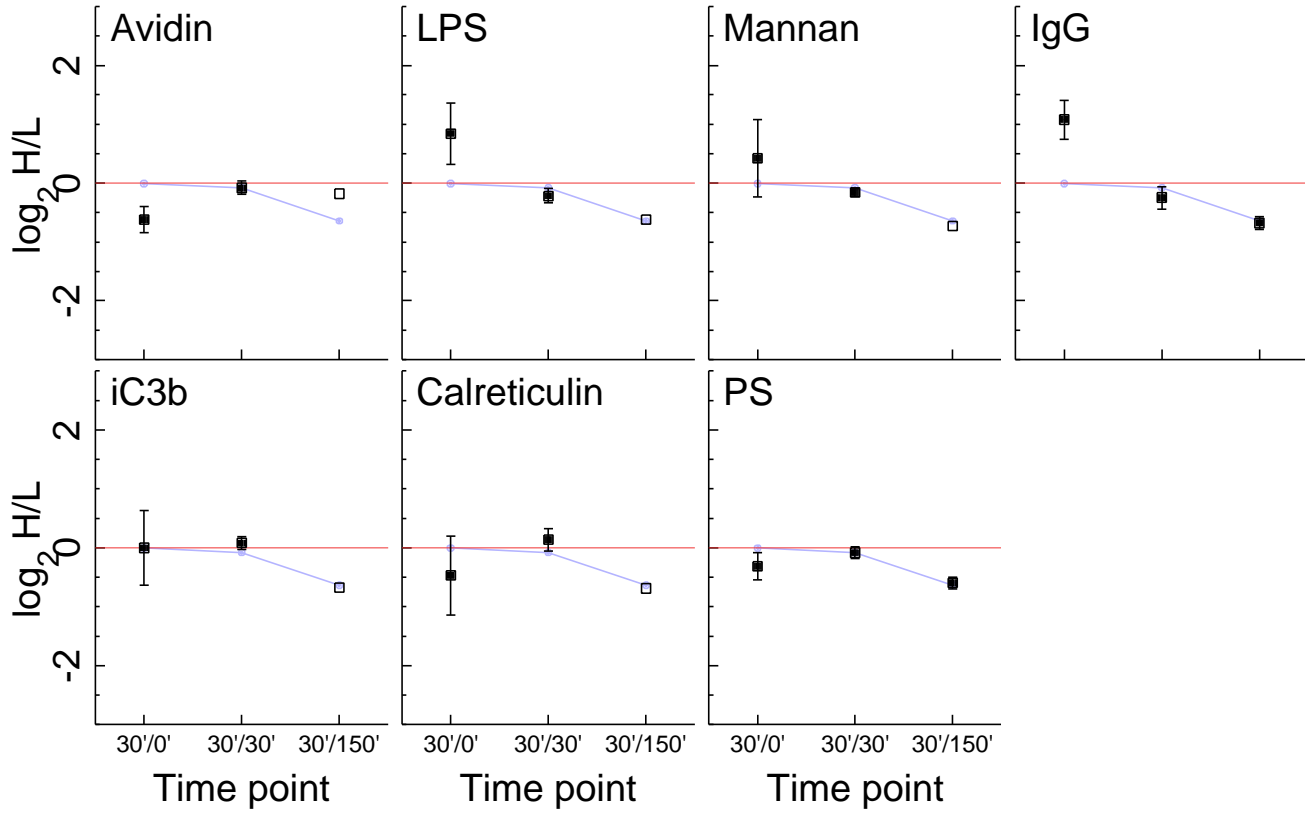

### sipa1 (E9Q0Y4)

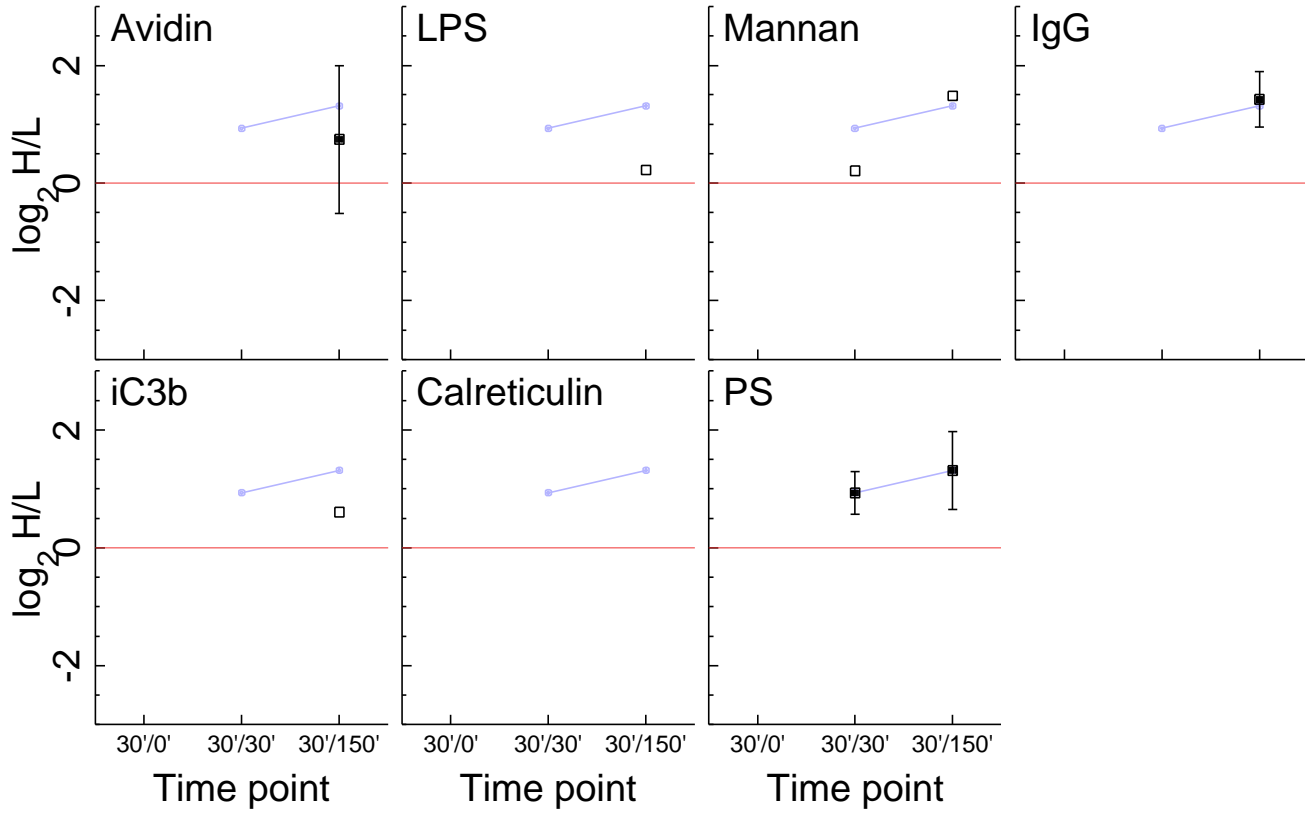

sirpa:1 (E0CYM8)

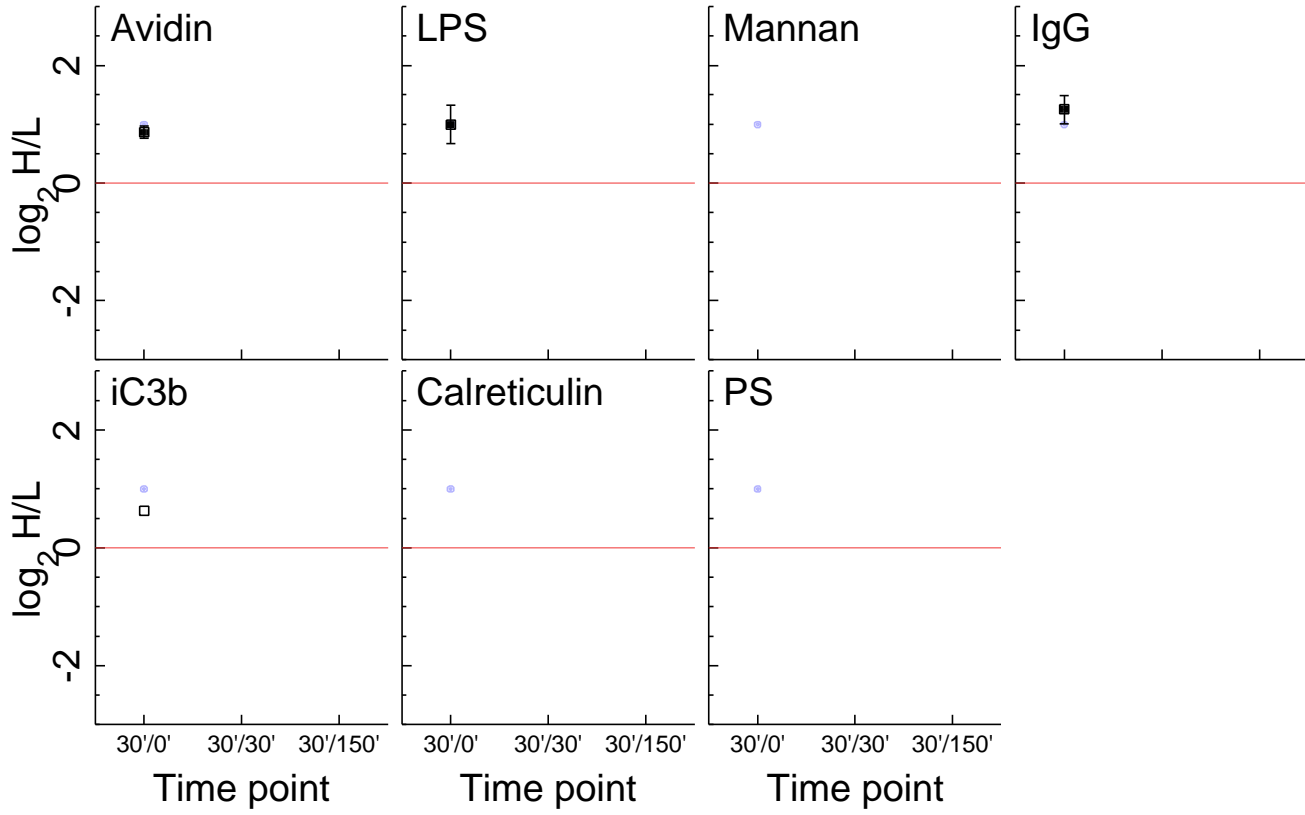

sirpa:2 (Q6P6I8)

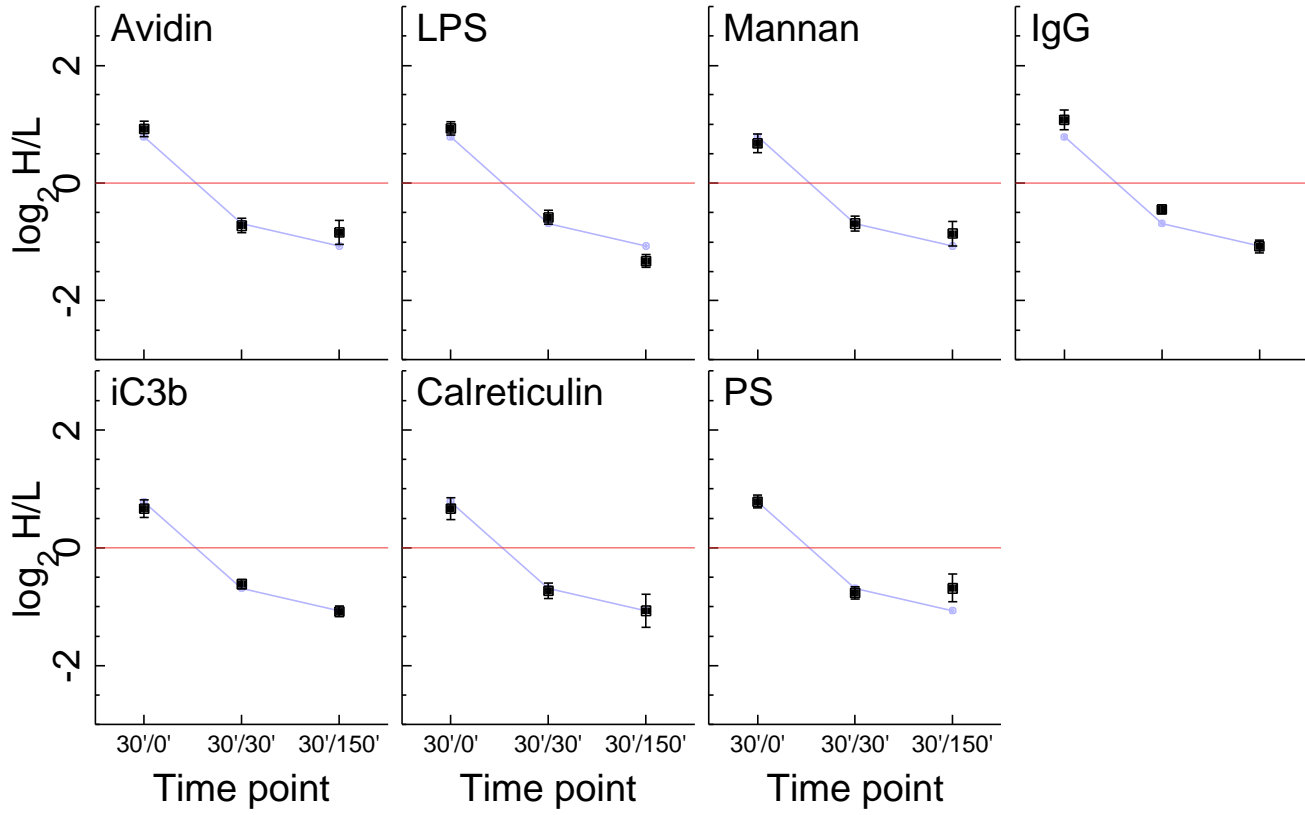

sirt2 (Q8VDQ8)

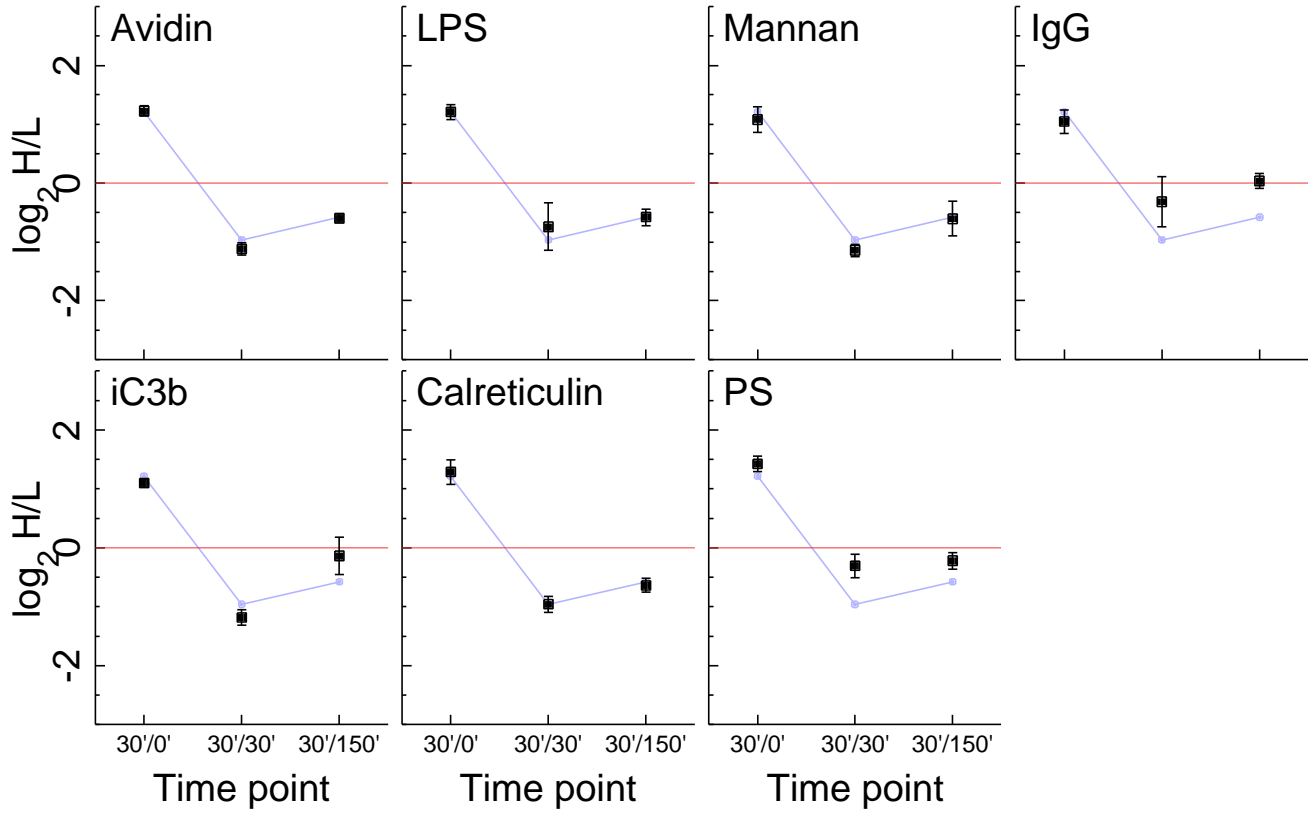

skap2 (Q3UND0)

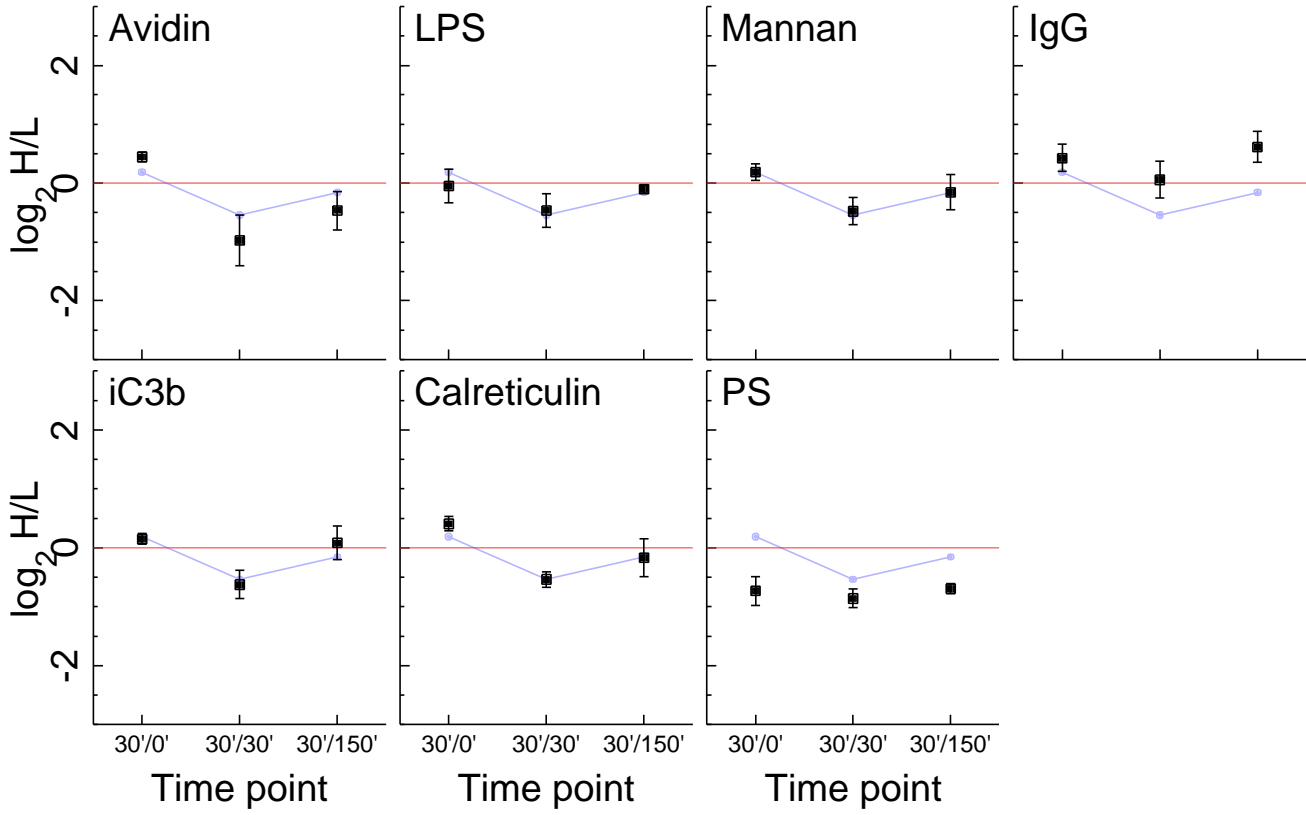



skp1 (Q9WTX5)

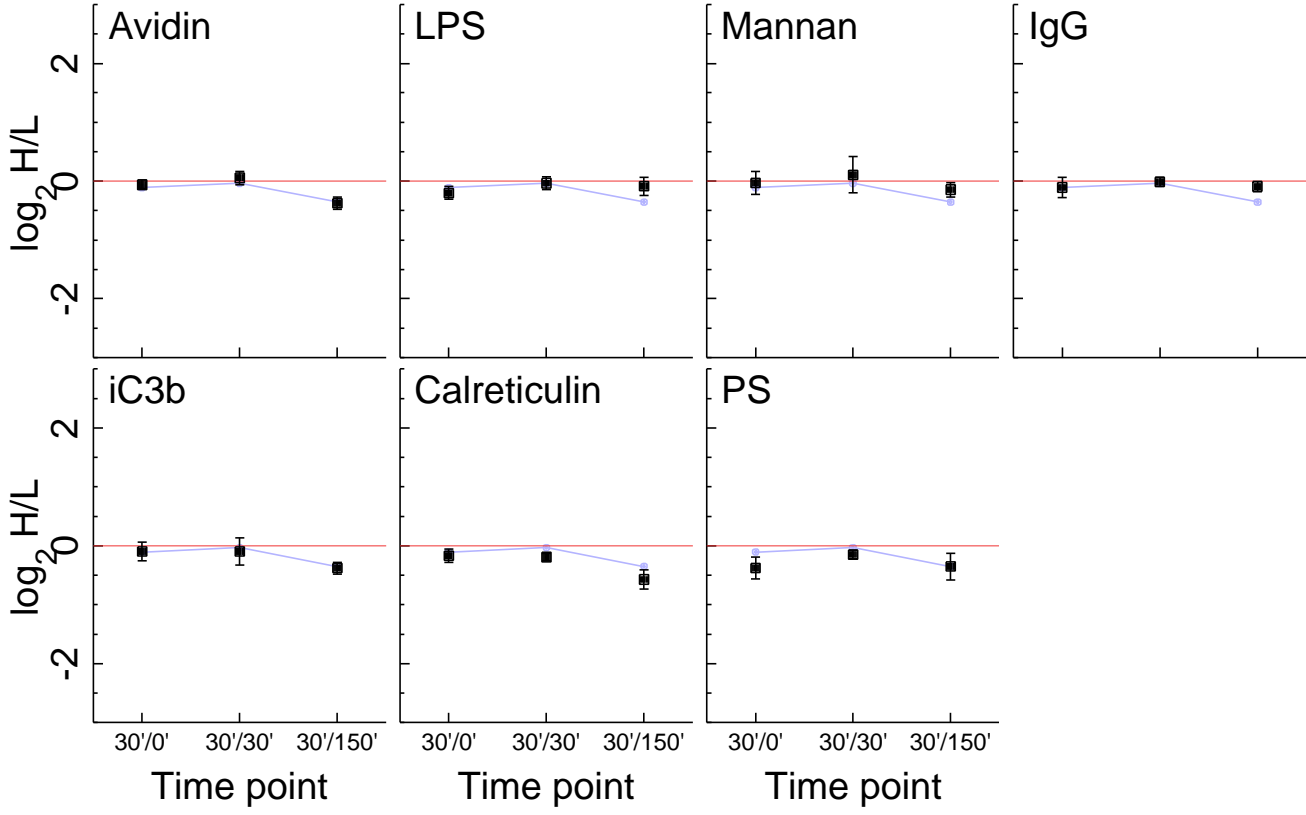

### slc11a1 (P41251)

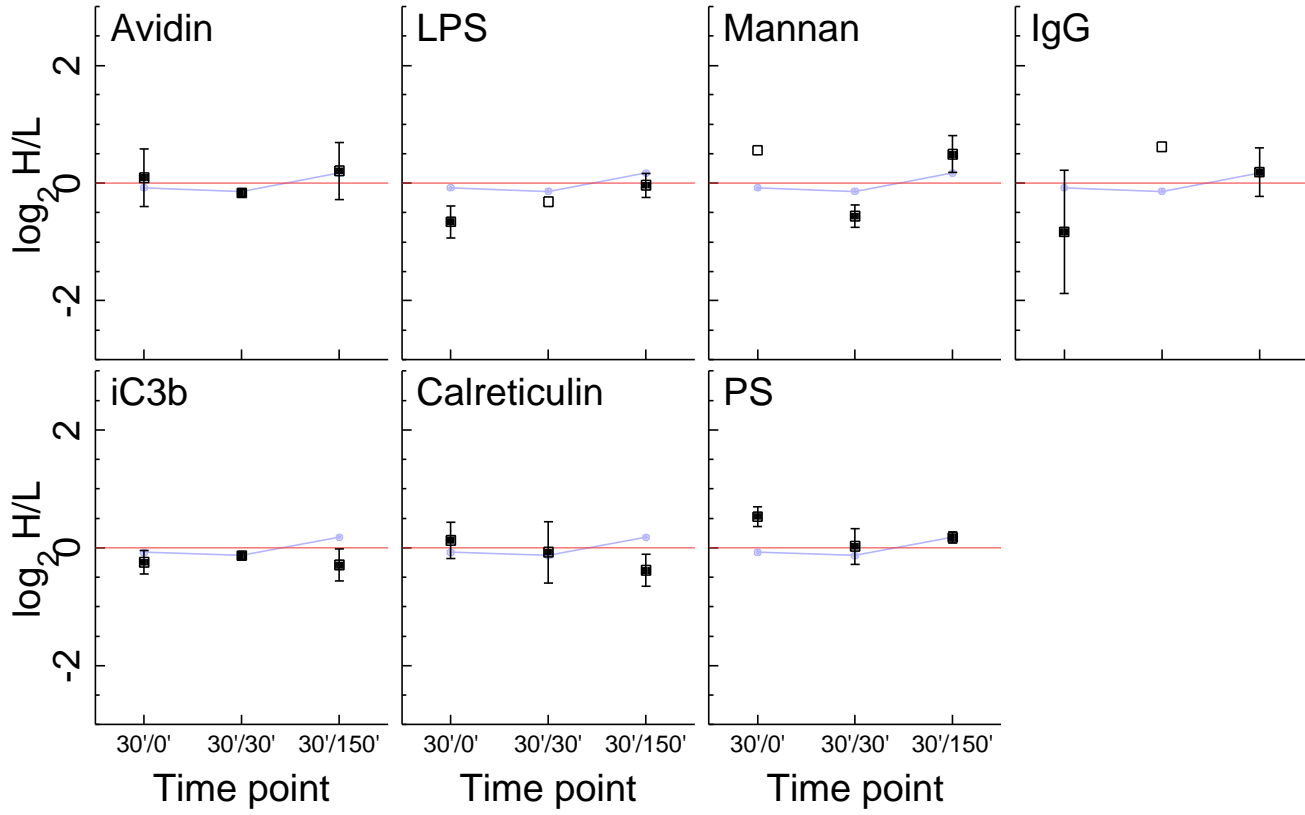

### slc12a4 (Q9JIS8)

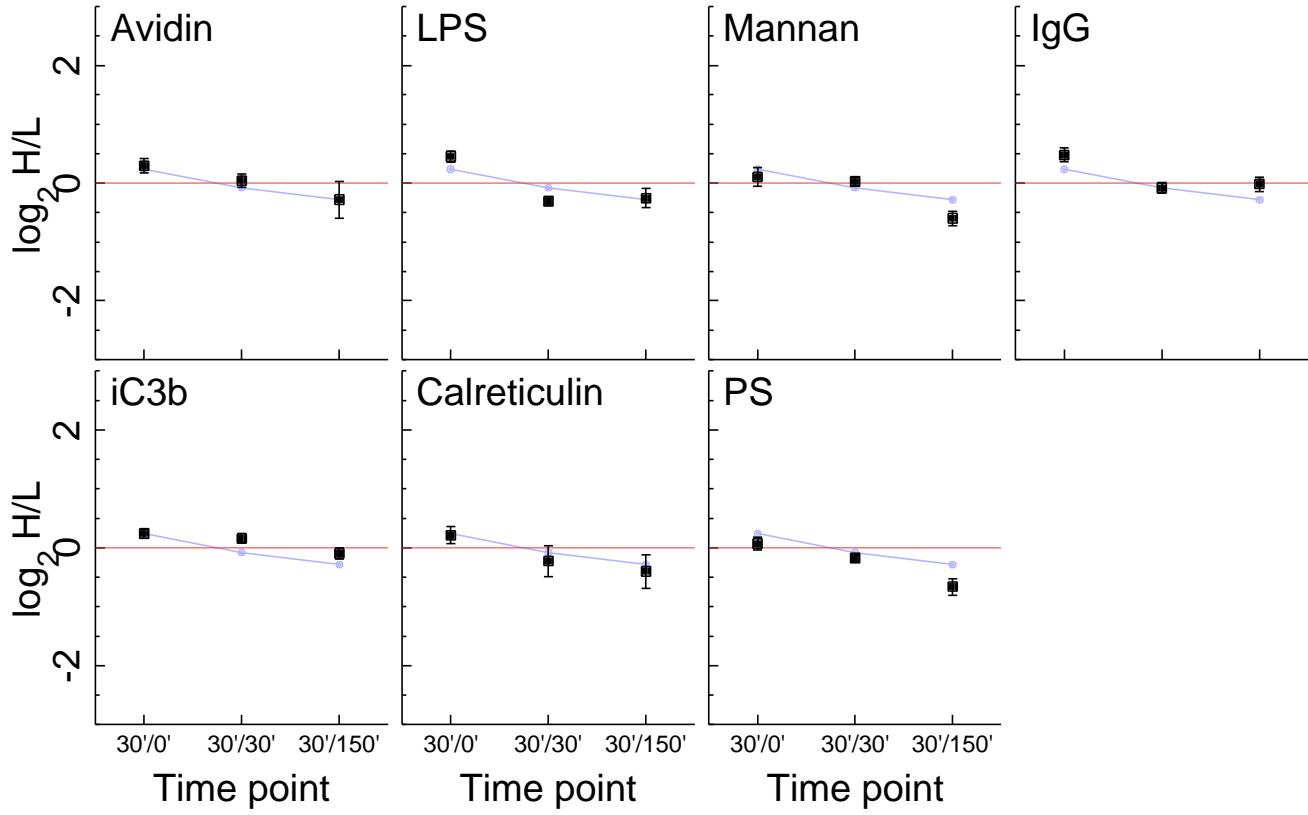

### slc12a6 (Q924N4)

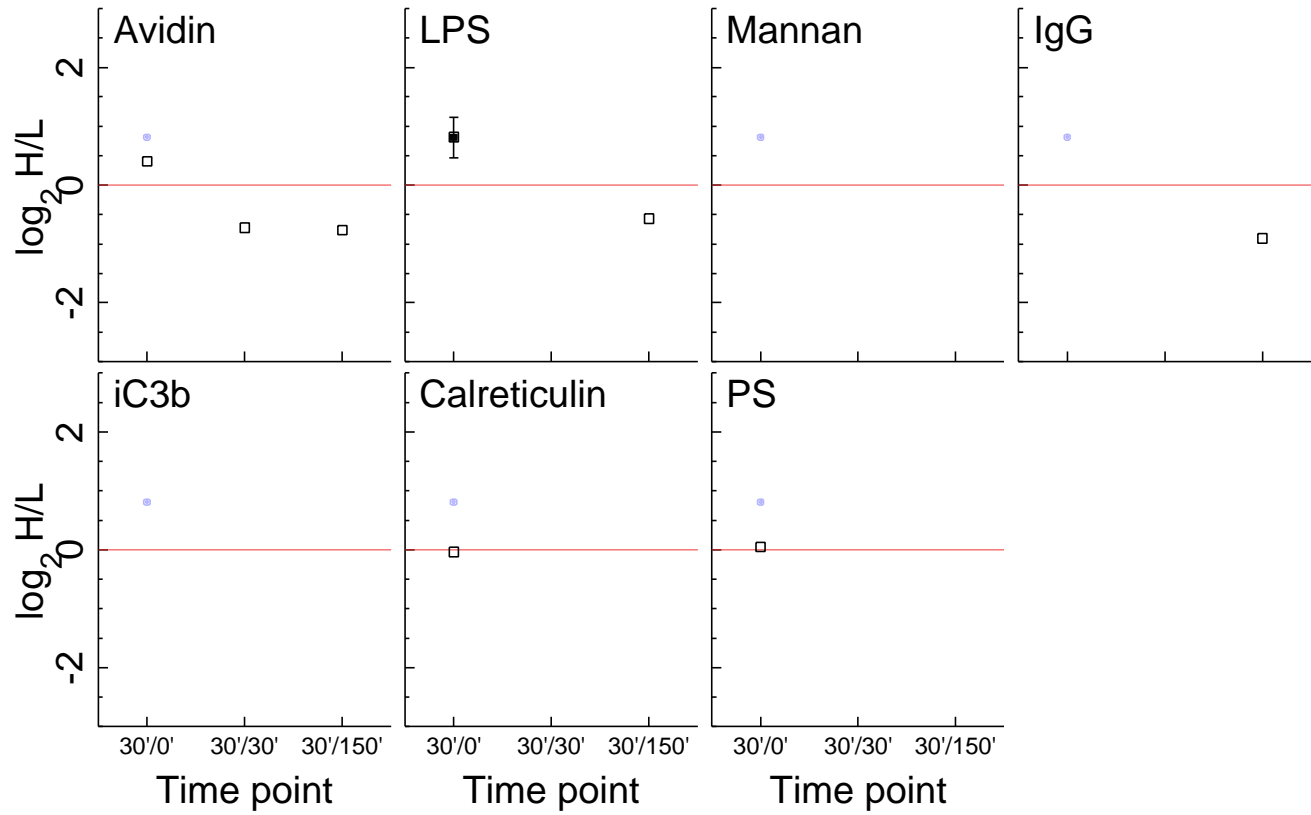

### slc12a7 (Q9WVL3)

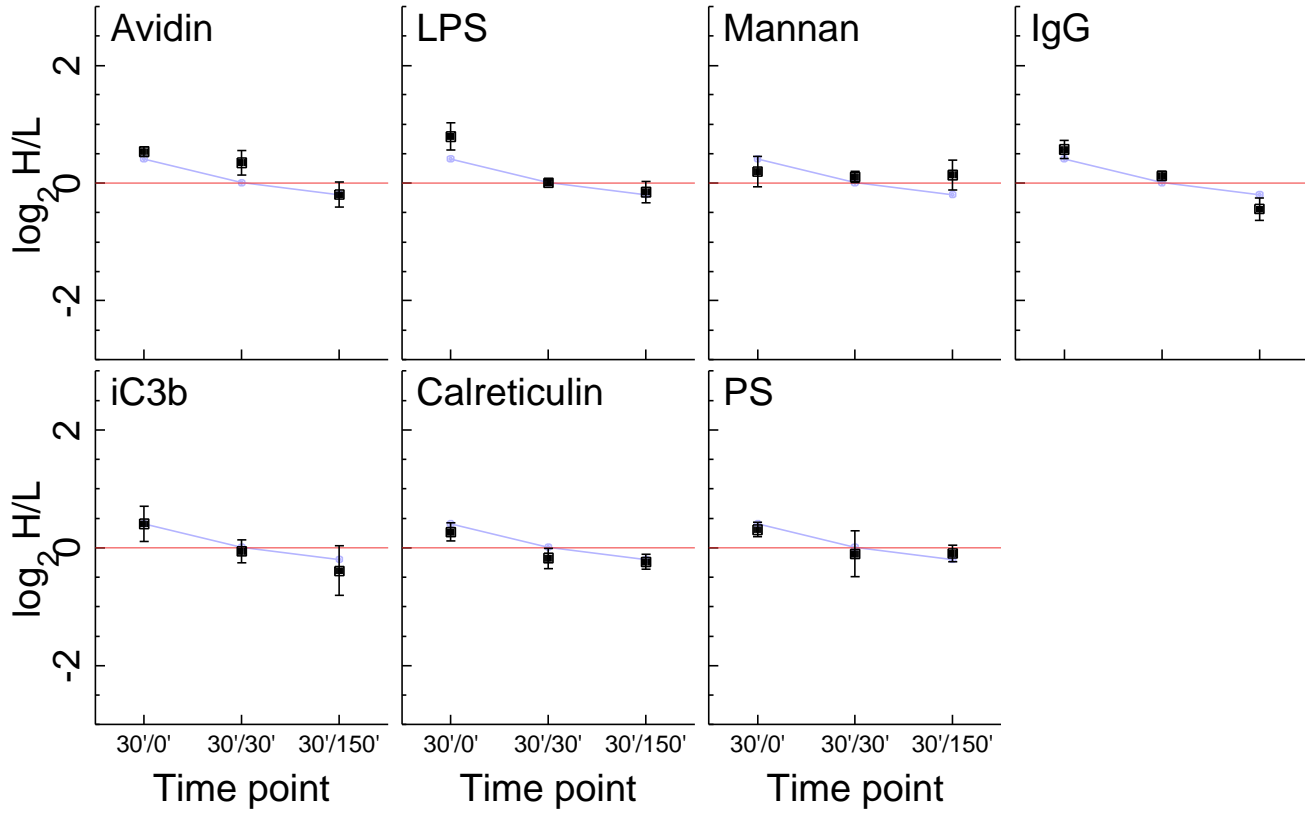

### slc12a9 (Q99MR3)

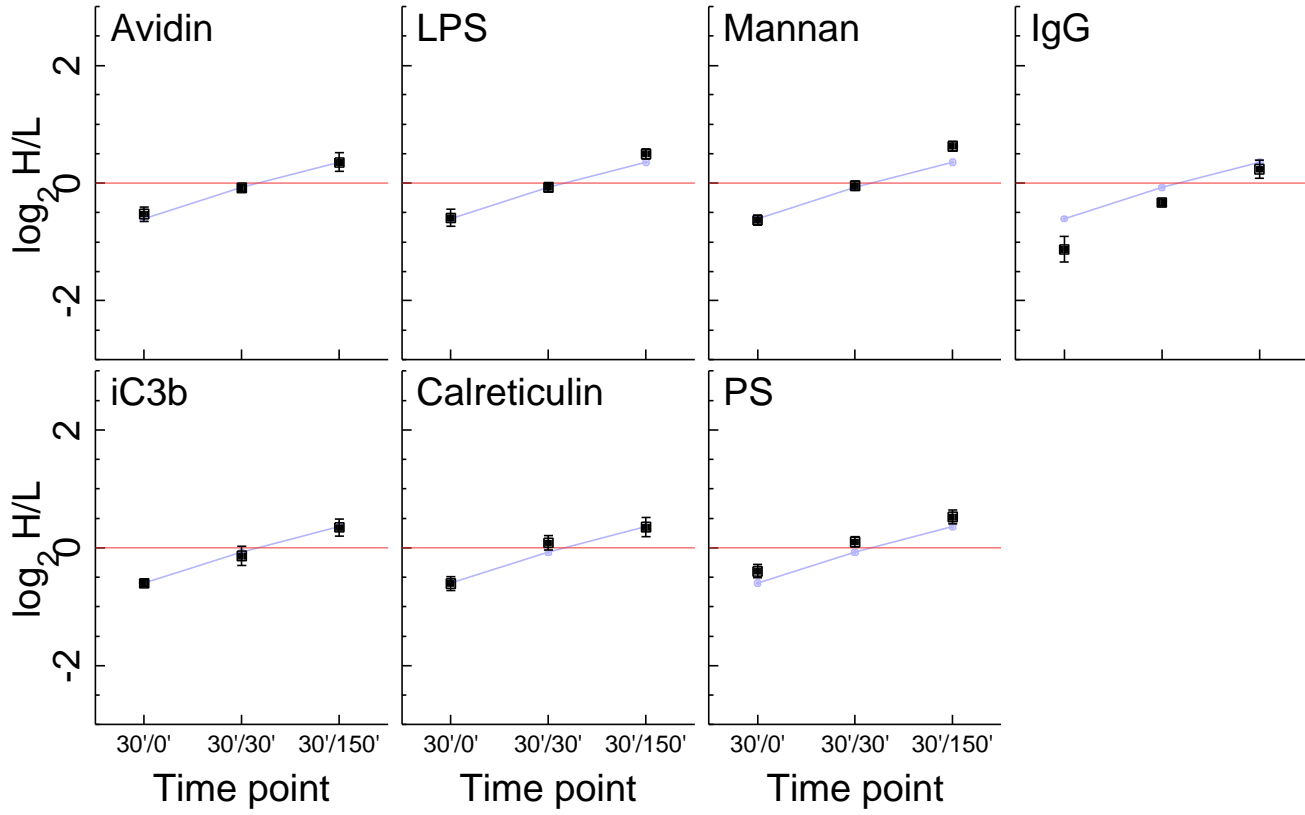

### slc15a3 (Q8BPX9)

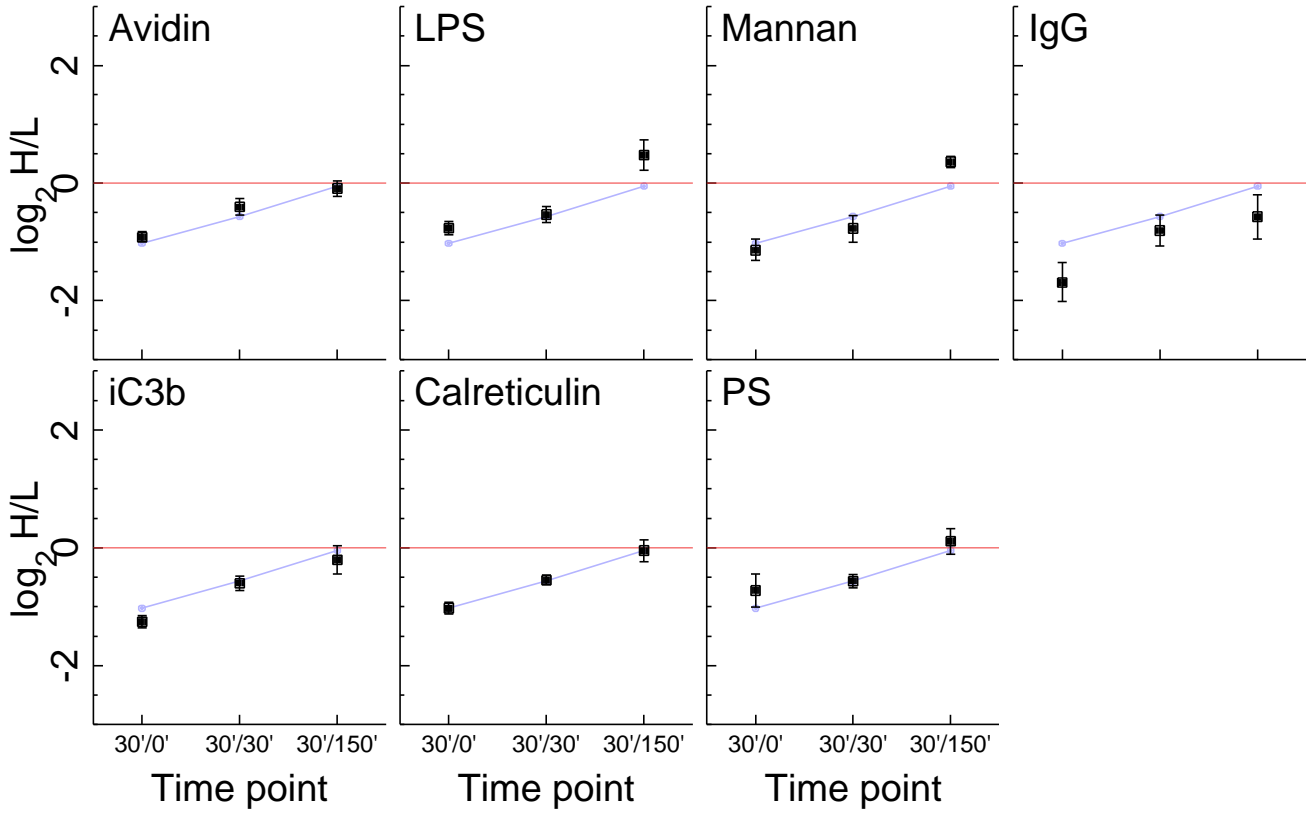

slc15a4 (Q91W98)

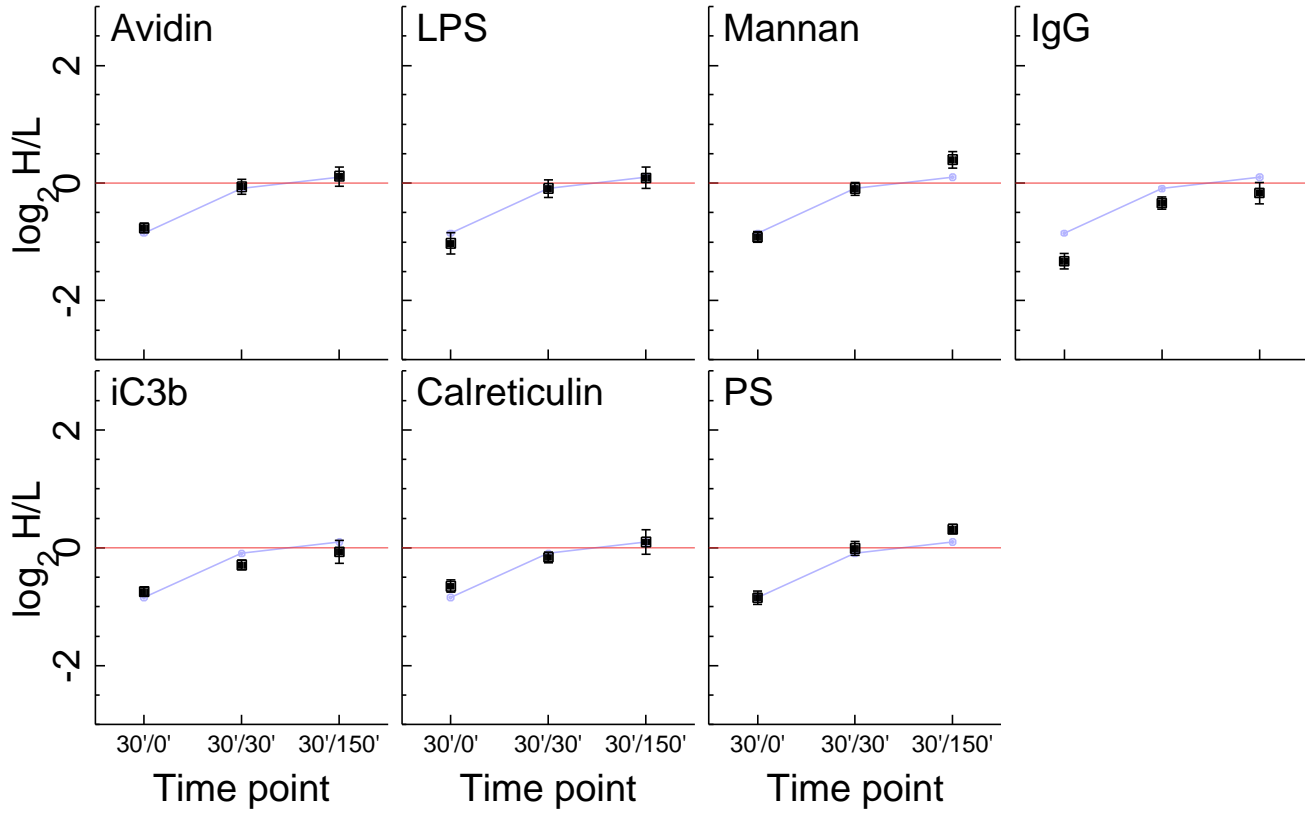



### slc16a10 (Q3U9N9)

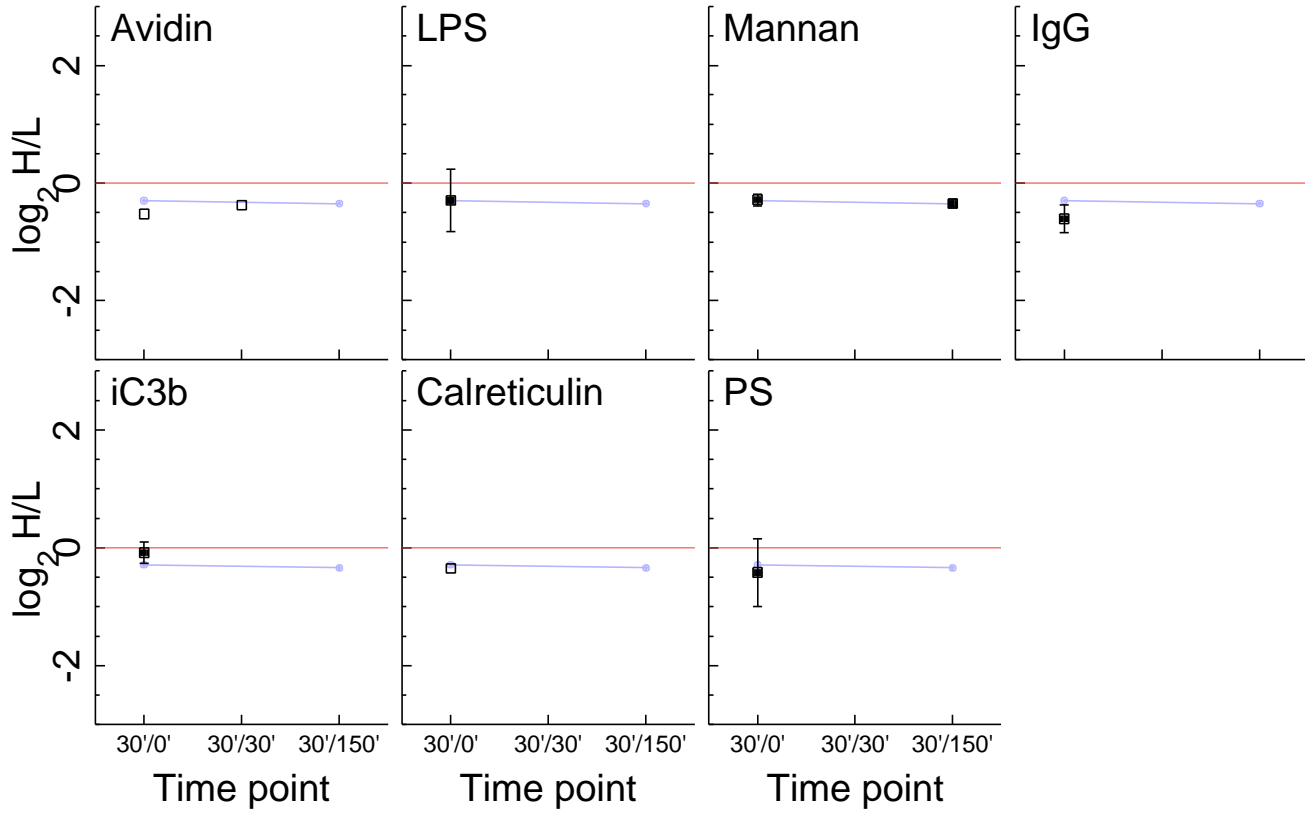

slc16a1 (P53986)

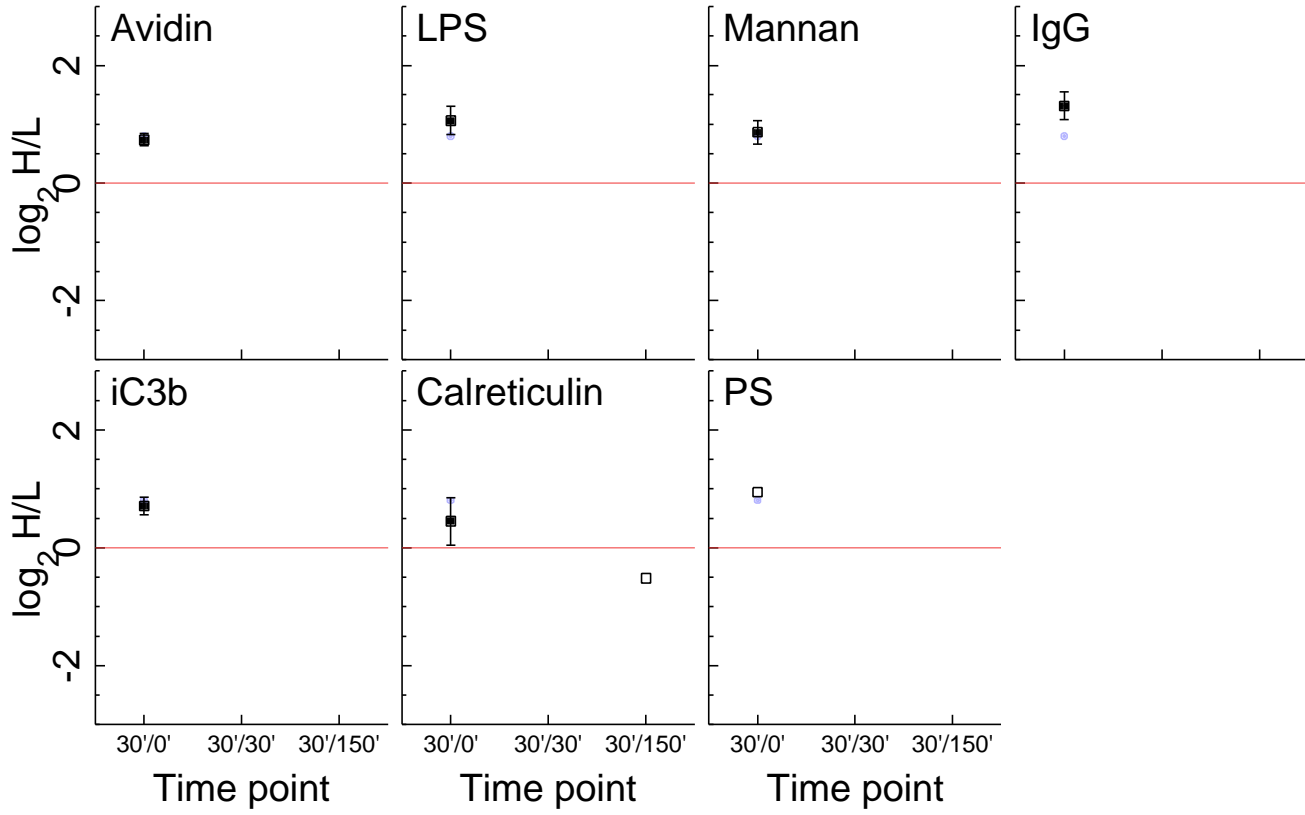

### slc16a3 (P57787)

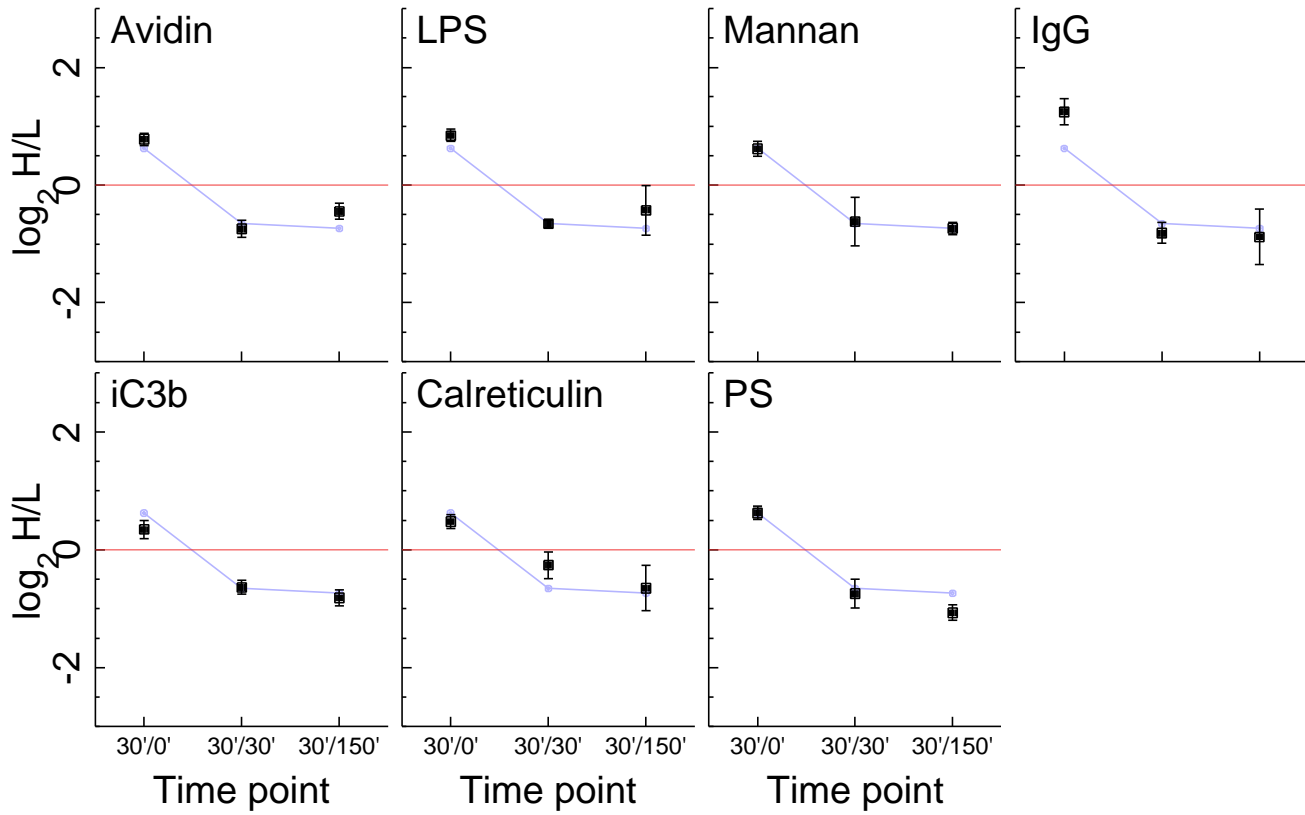

### slc17a5 (Q8BN82)

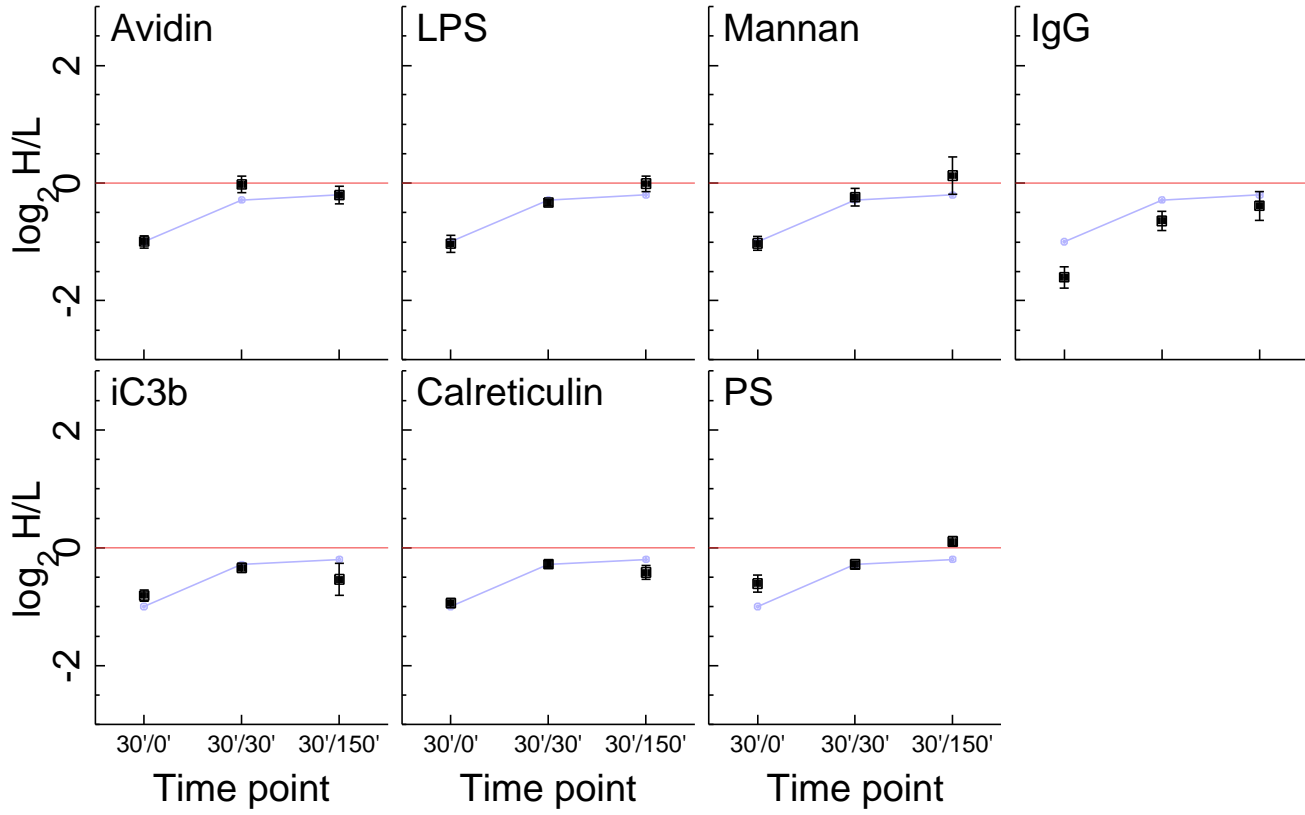

### slc1a5 (Q9ESU7)

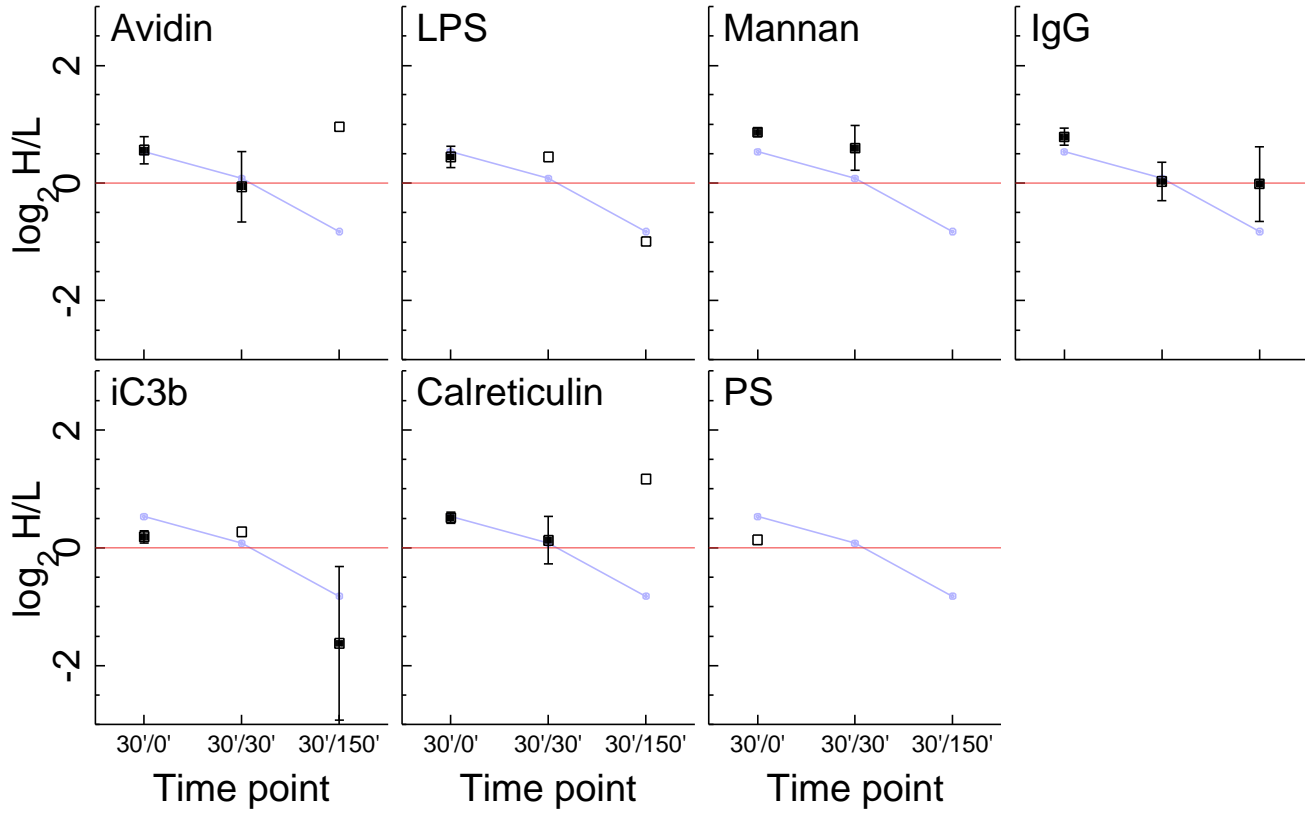

### slc23a2 (Q9EPR4)

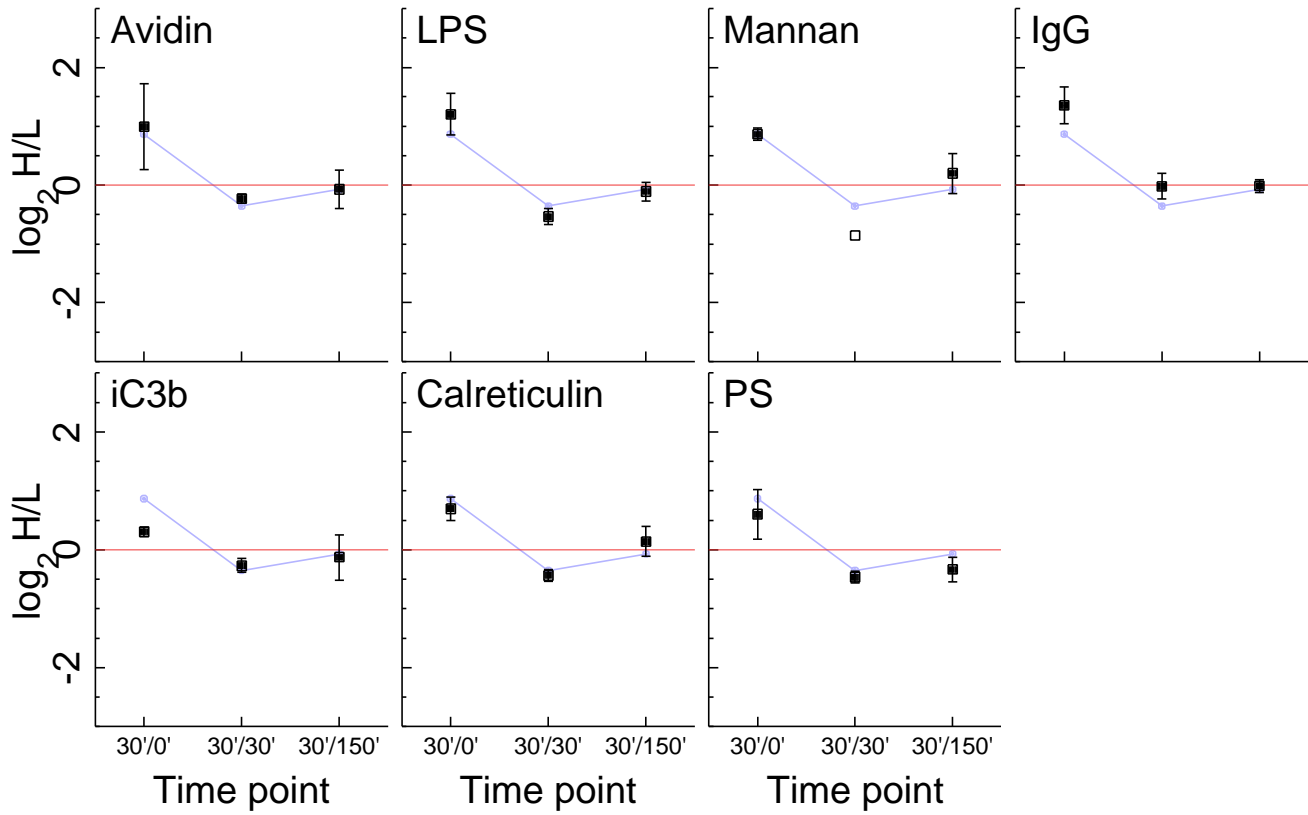

### slc25a10 (Q9QZD8)

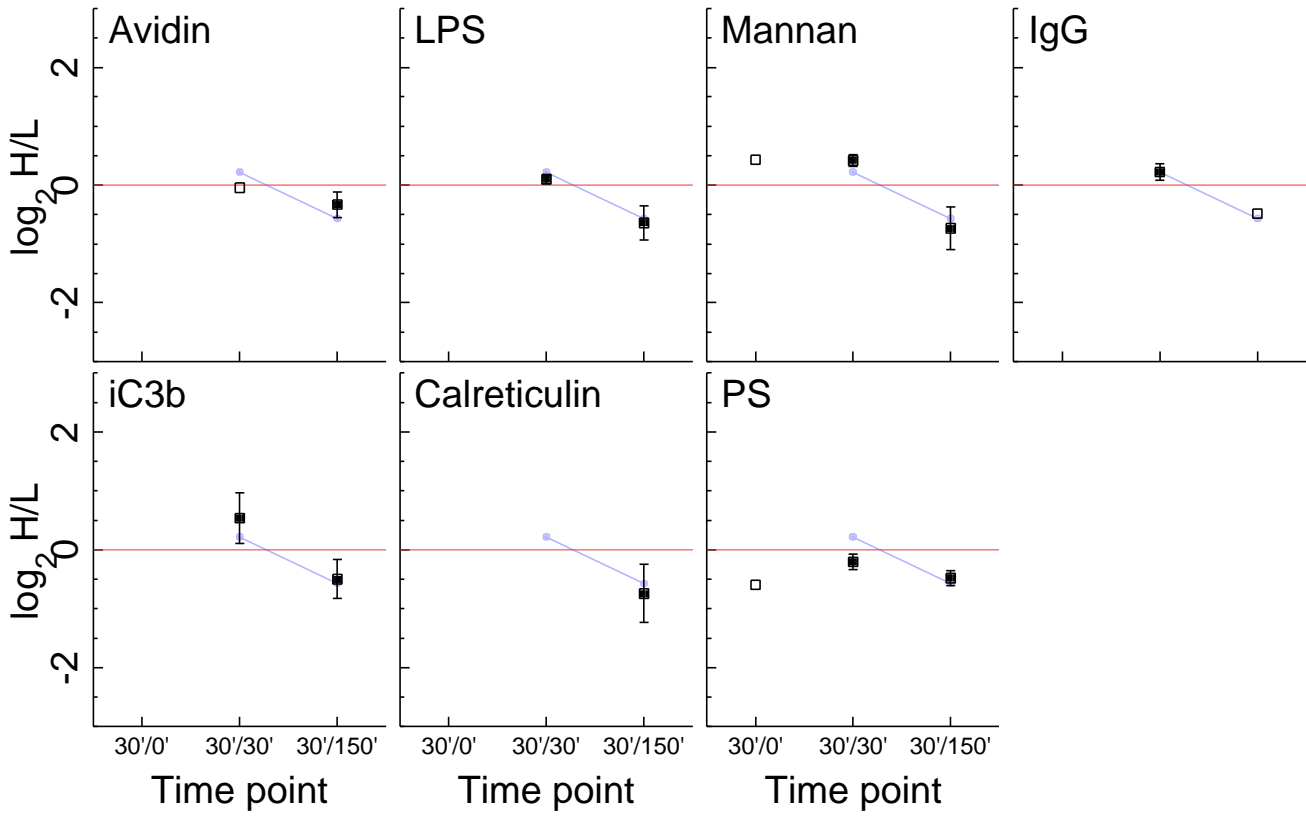

### slc25a11 (Q9CR62)

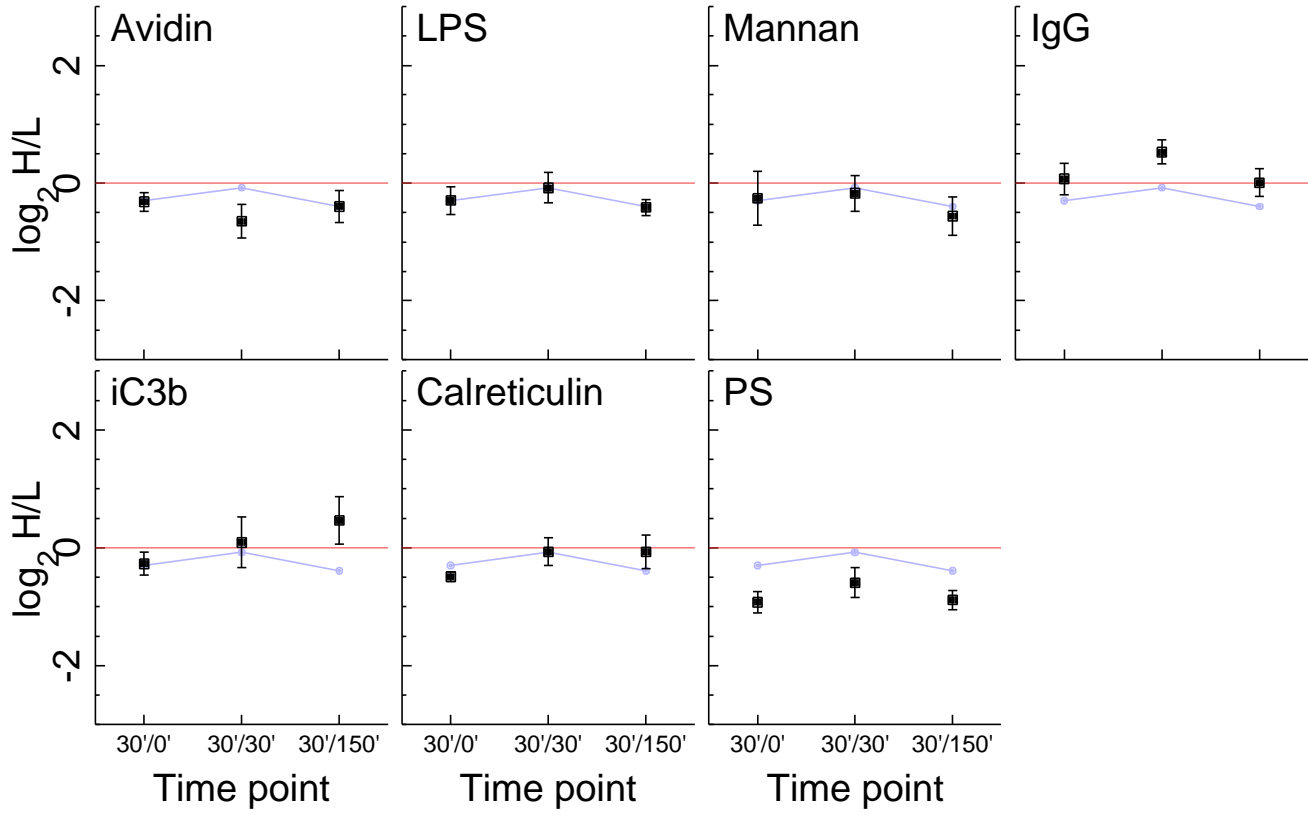



### slc25a12 (Q8BH59)

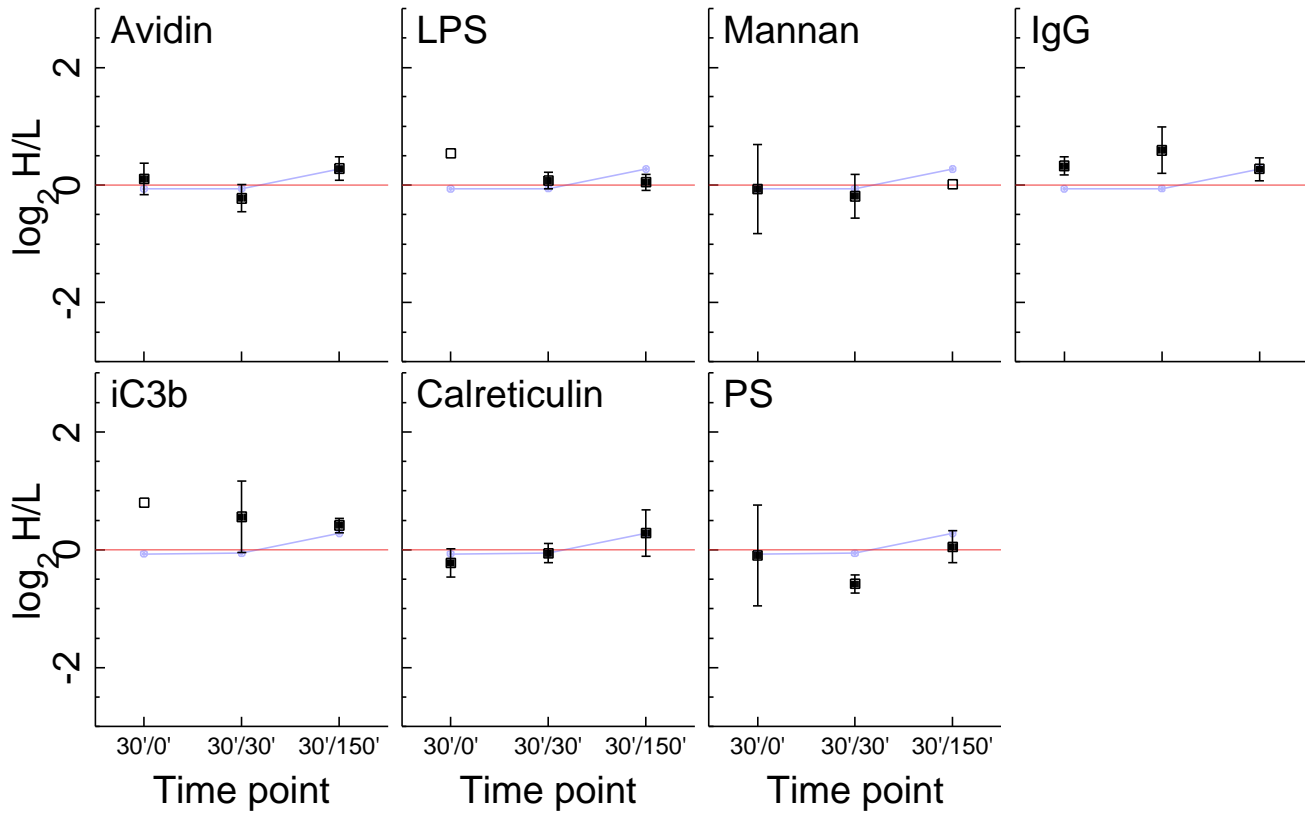

### slc25a13 (Q9QXX4)

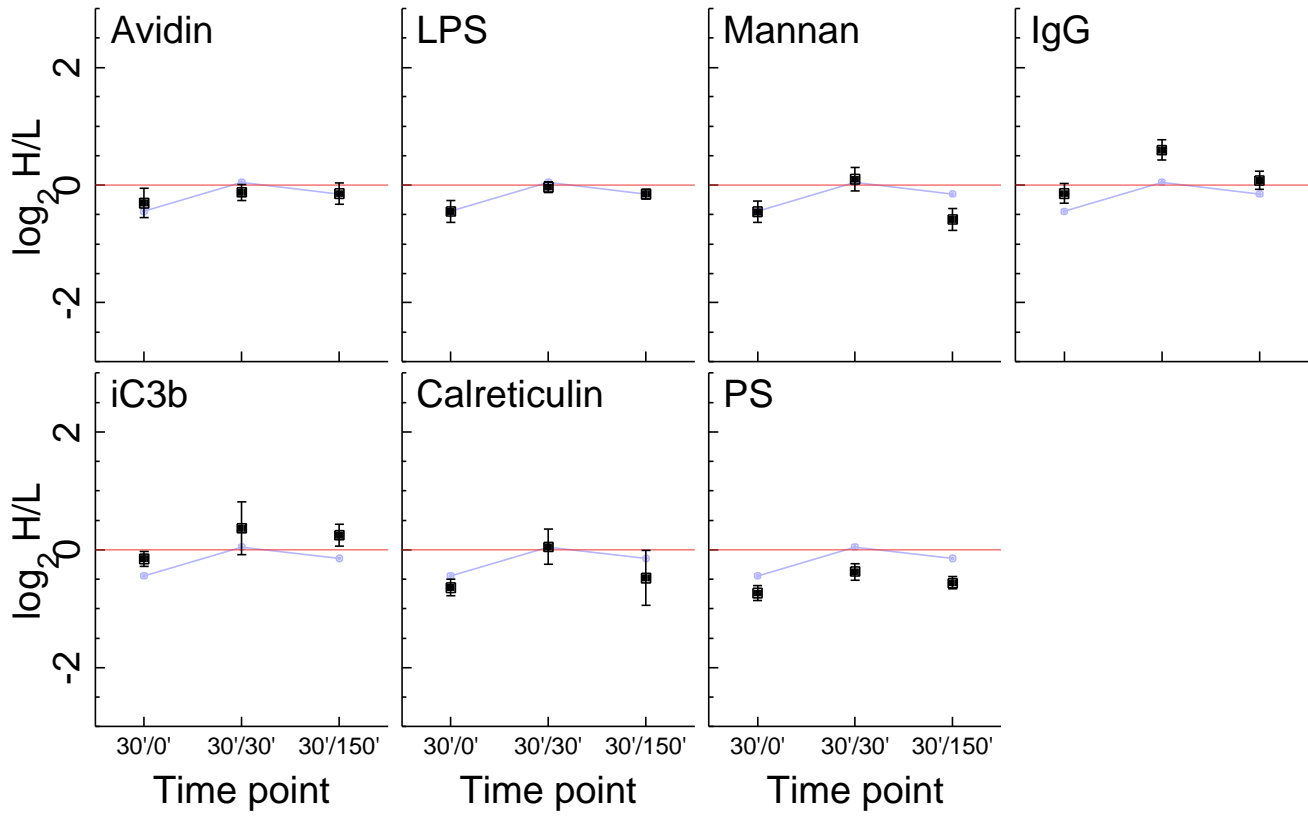

### slc25a1 (Q8JZU2)

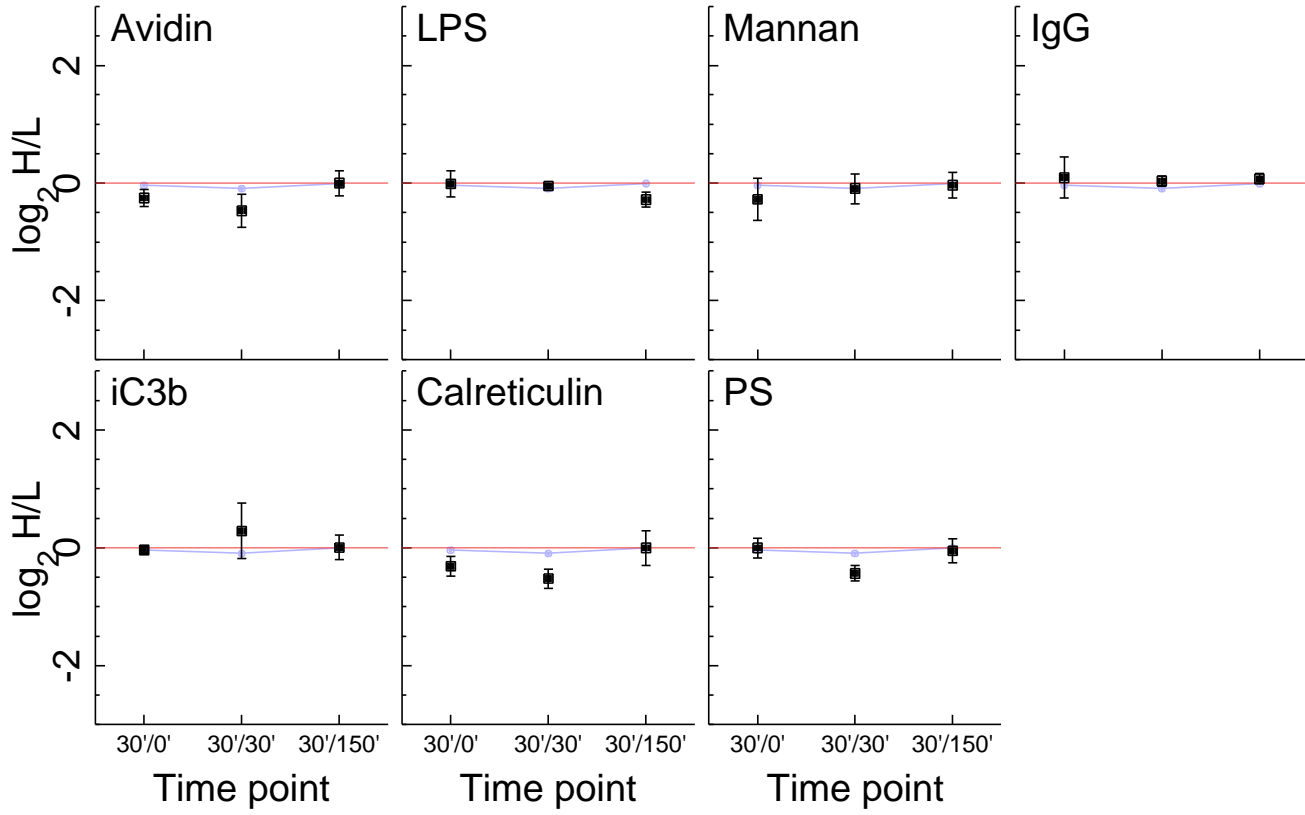

### slc25a24 (Q8BMD8)

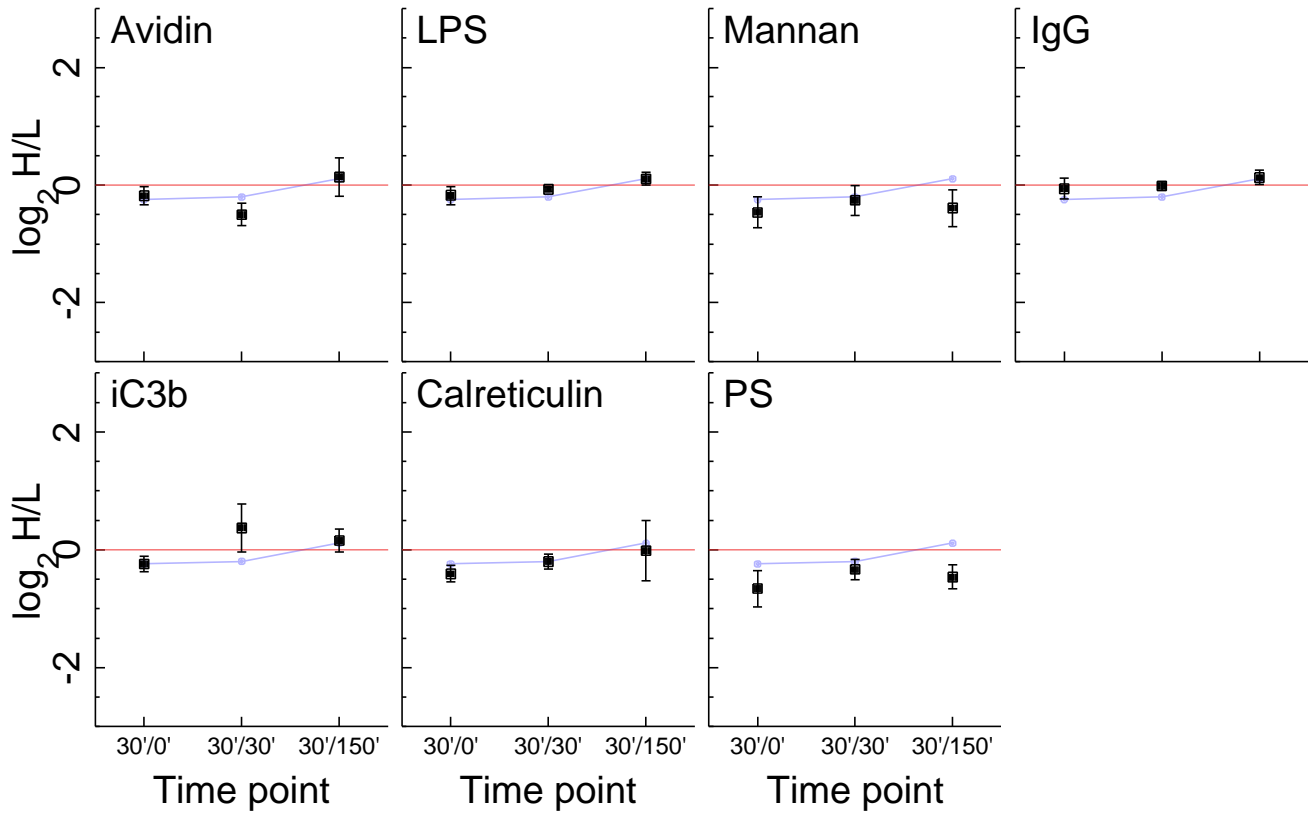

### slc25a3 (Q8VEM8)

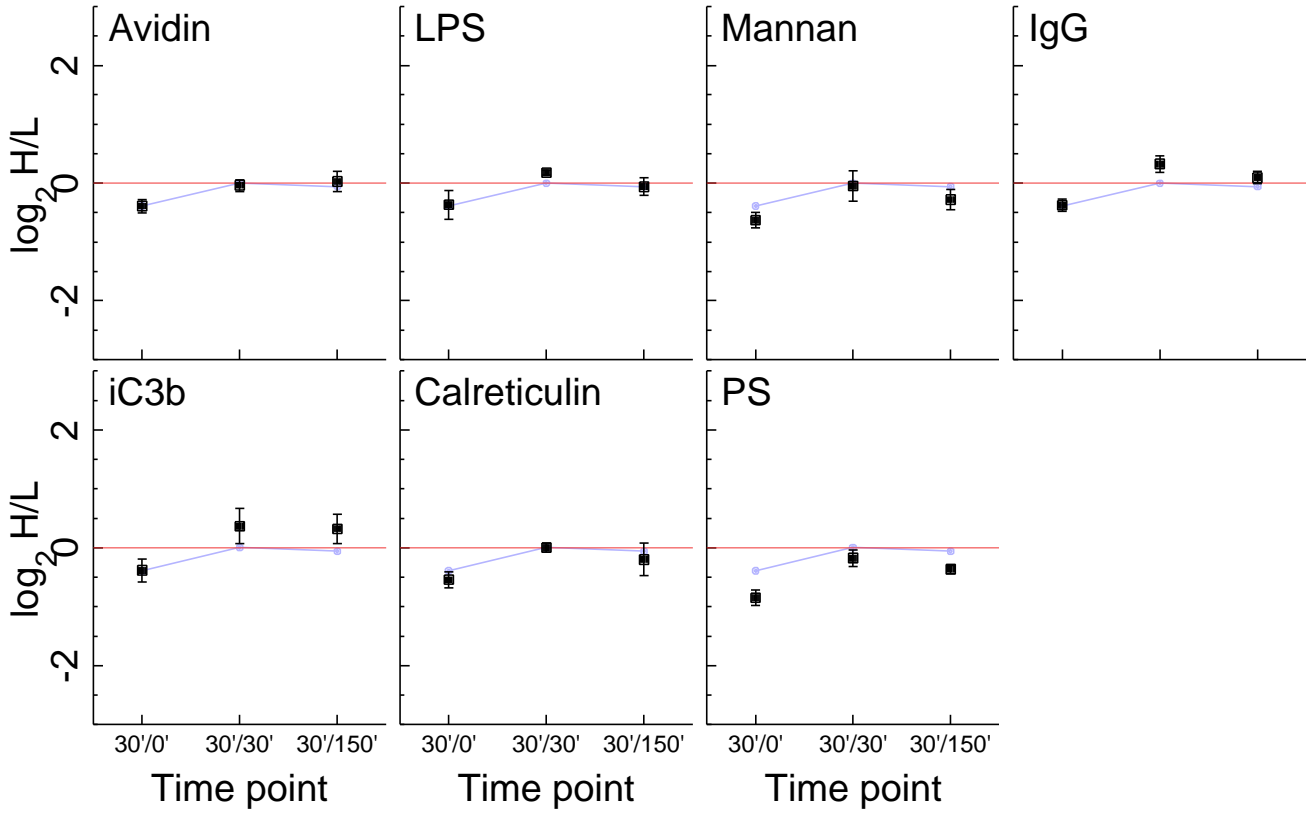

### slc25a4 (P48962)

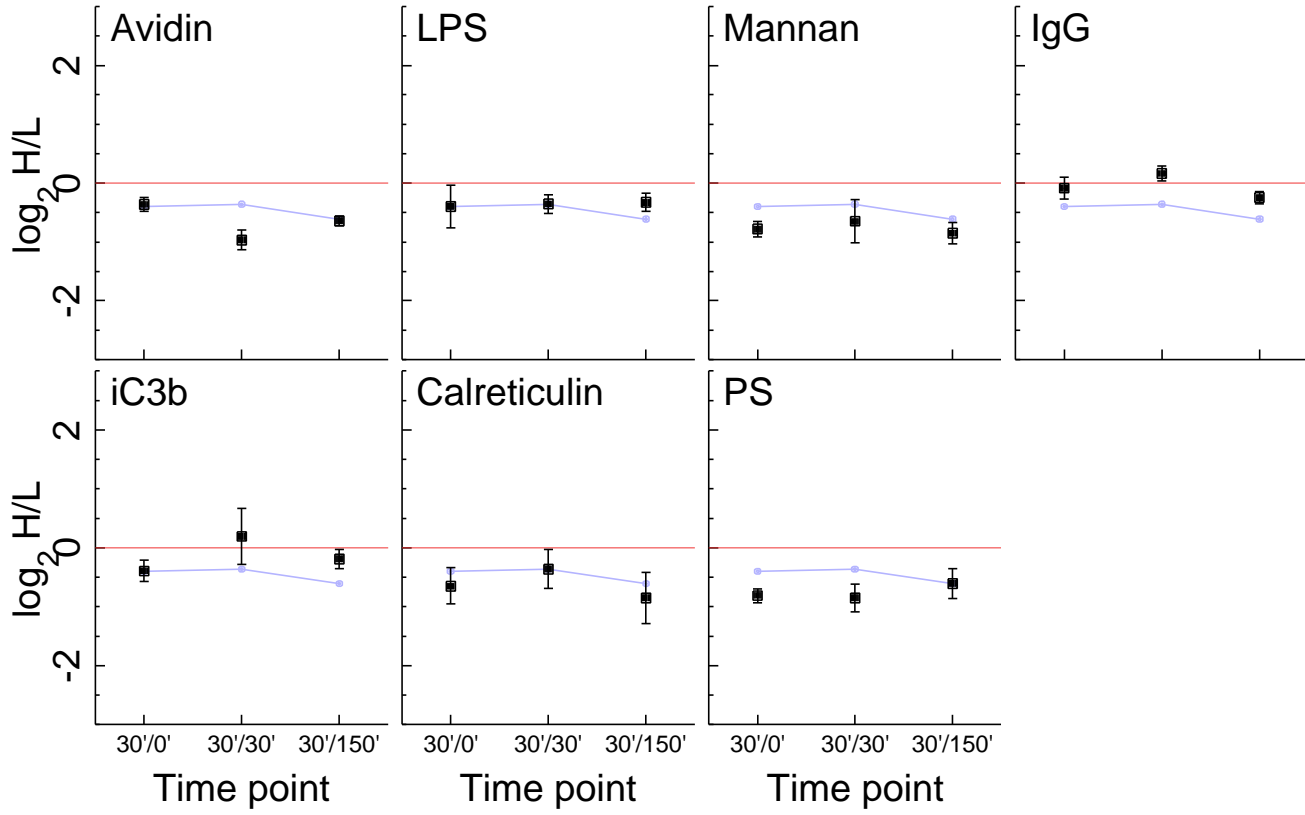

### slc25a5 (P51881)

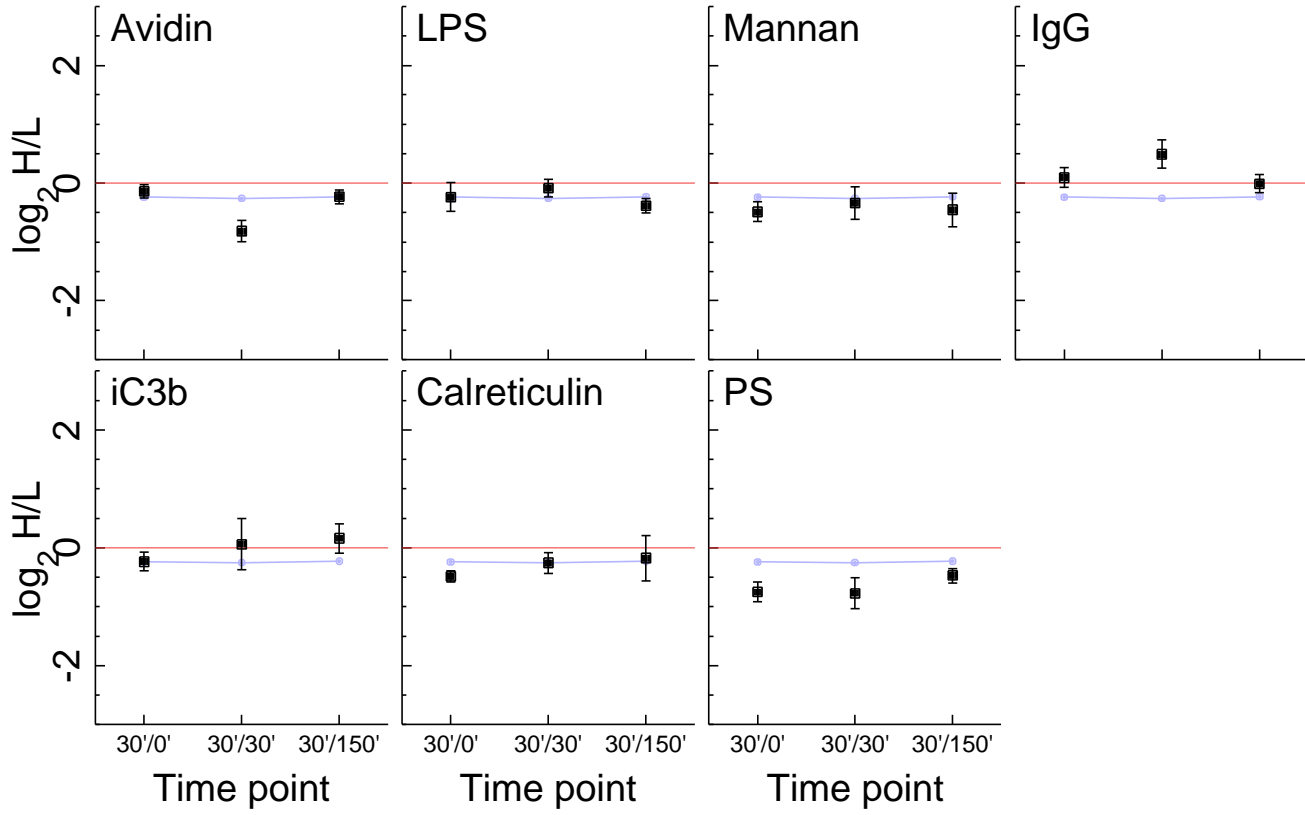

slc26a11 (Q80ZD3)

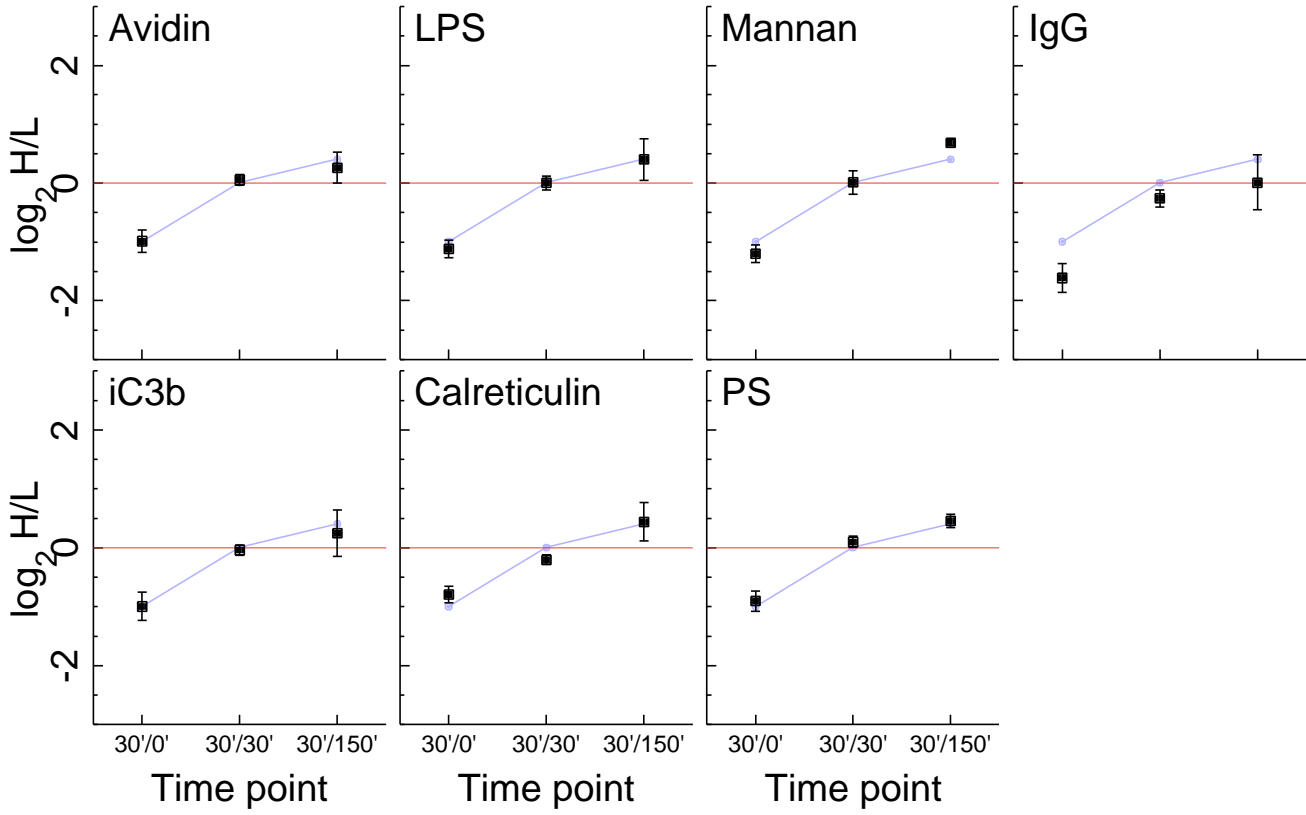



slc29a3 (Q99P65)

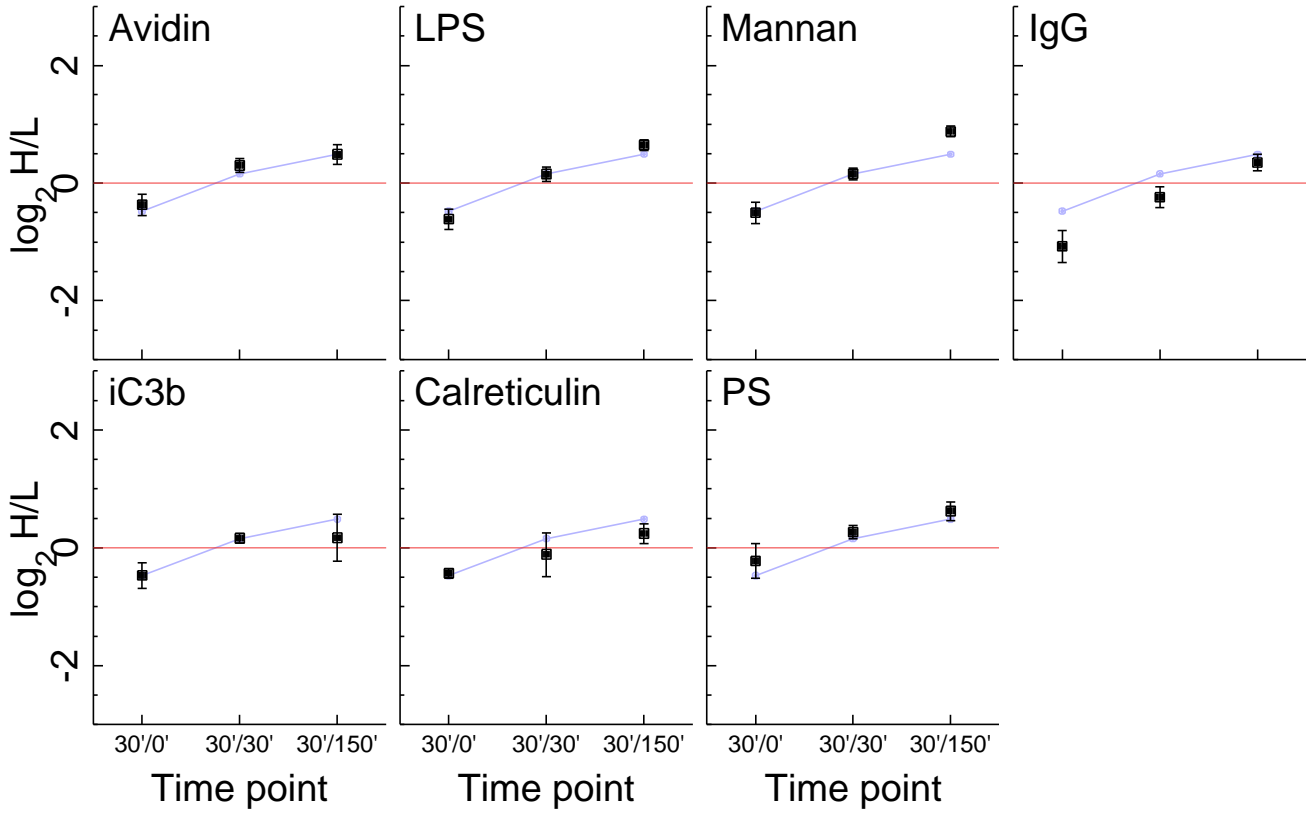

### slc2a1 (P17809)

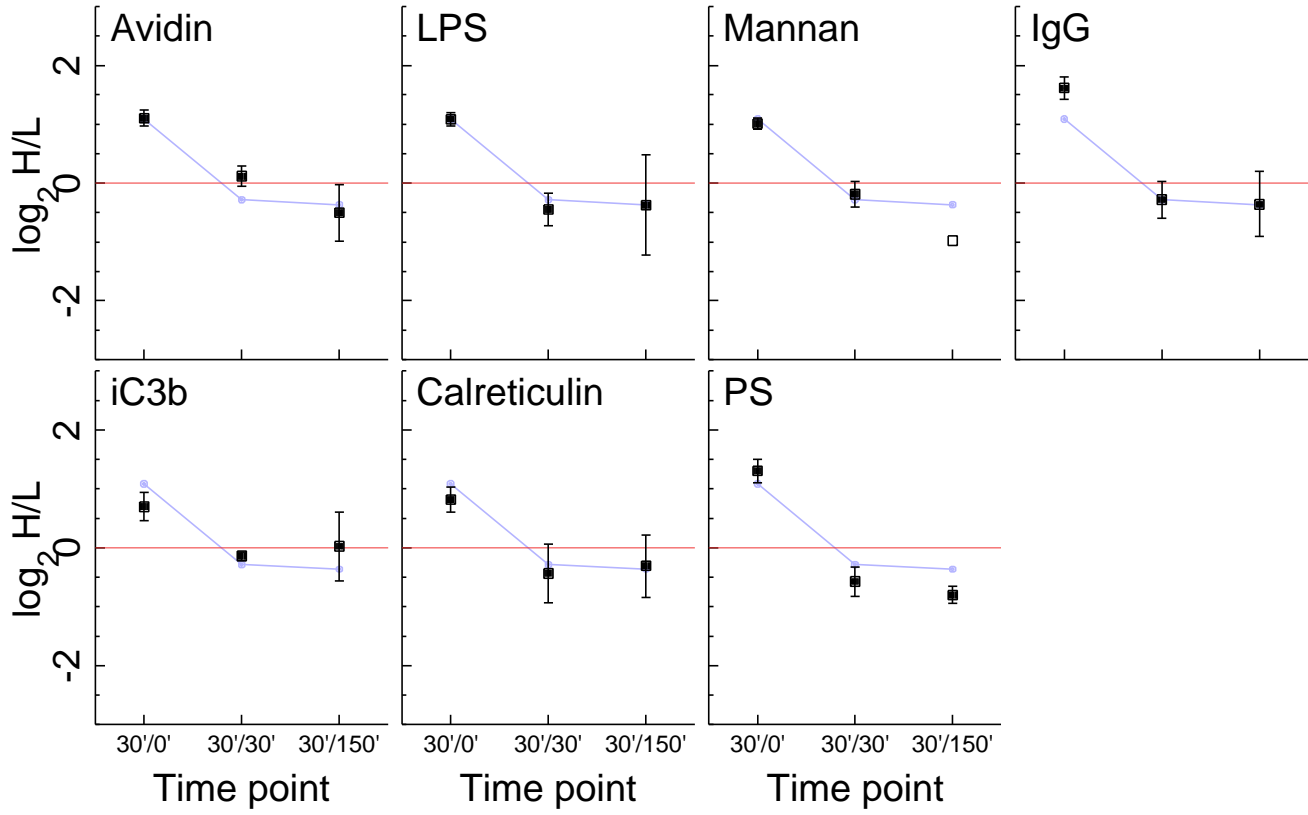

### slc2a6 (Q3UDF0)

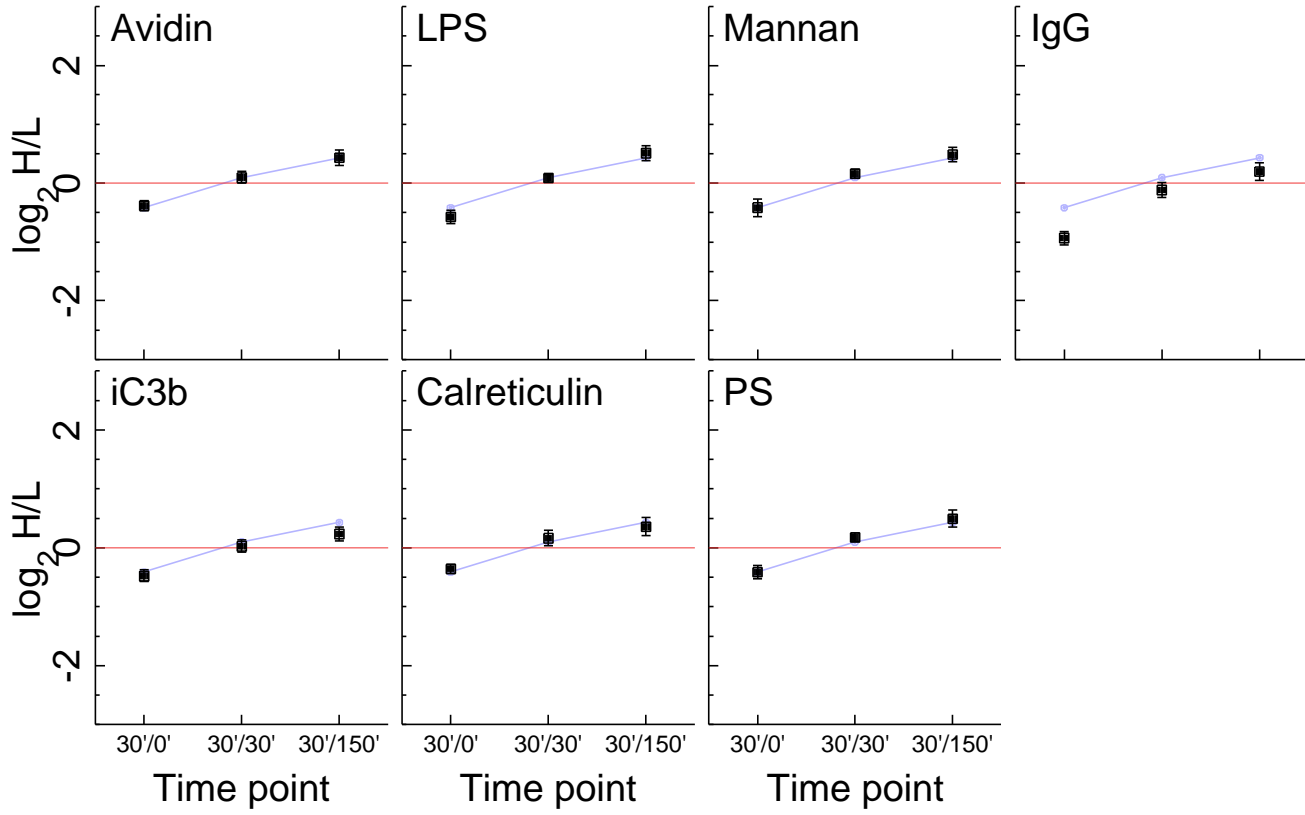

### slc2a8 (Q9JIF3)

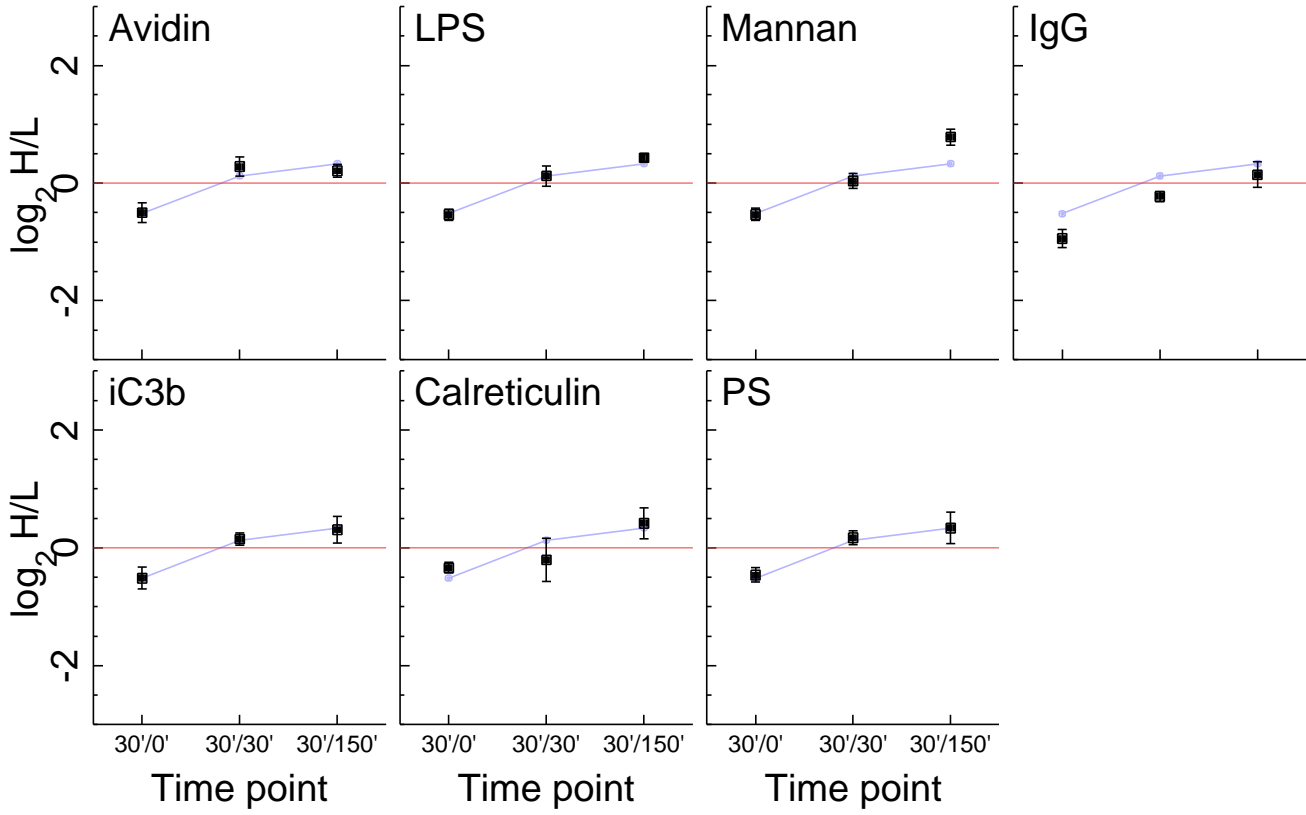

### slc30a7 (Q9JKN1)

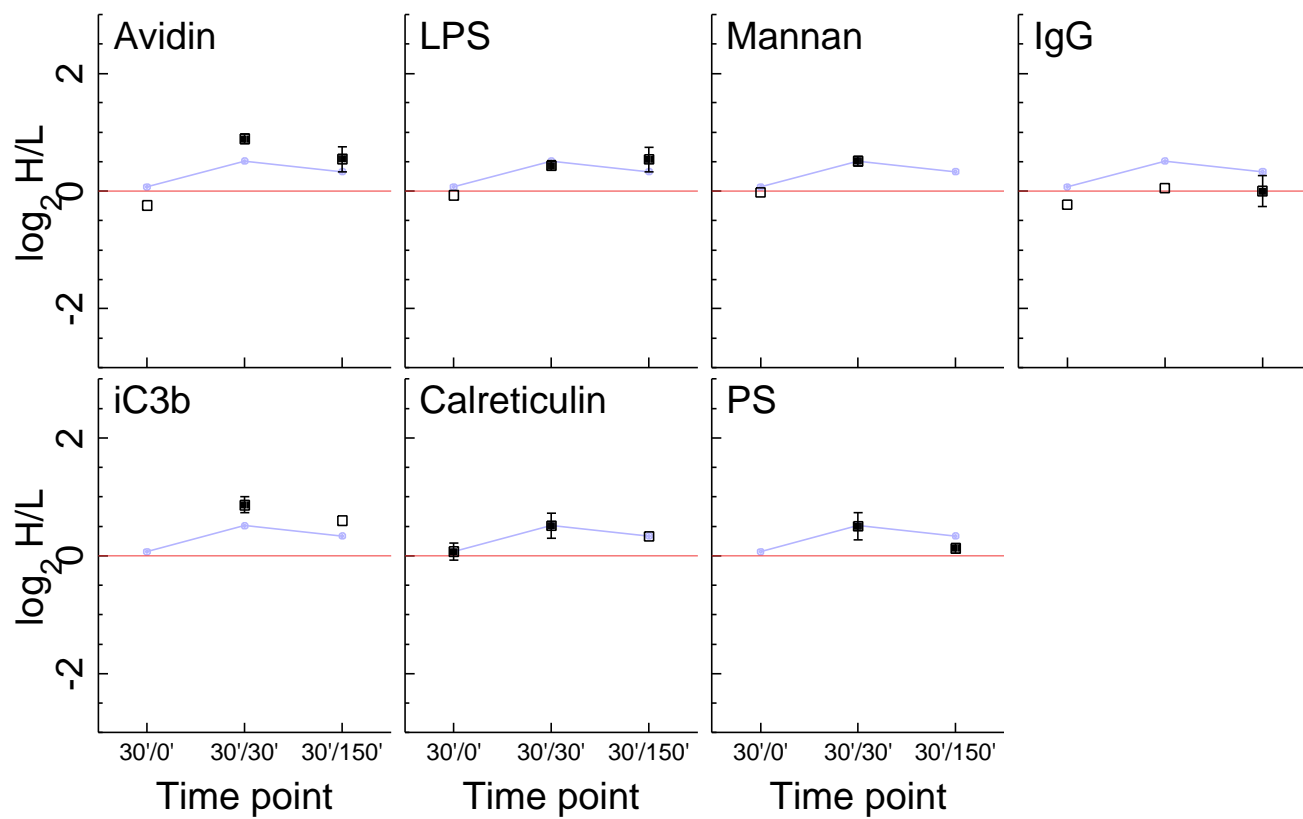

### slc31a1 (Q8K211)

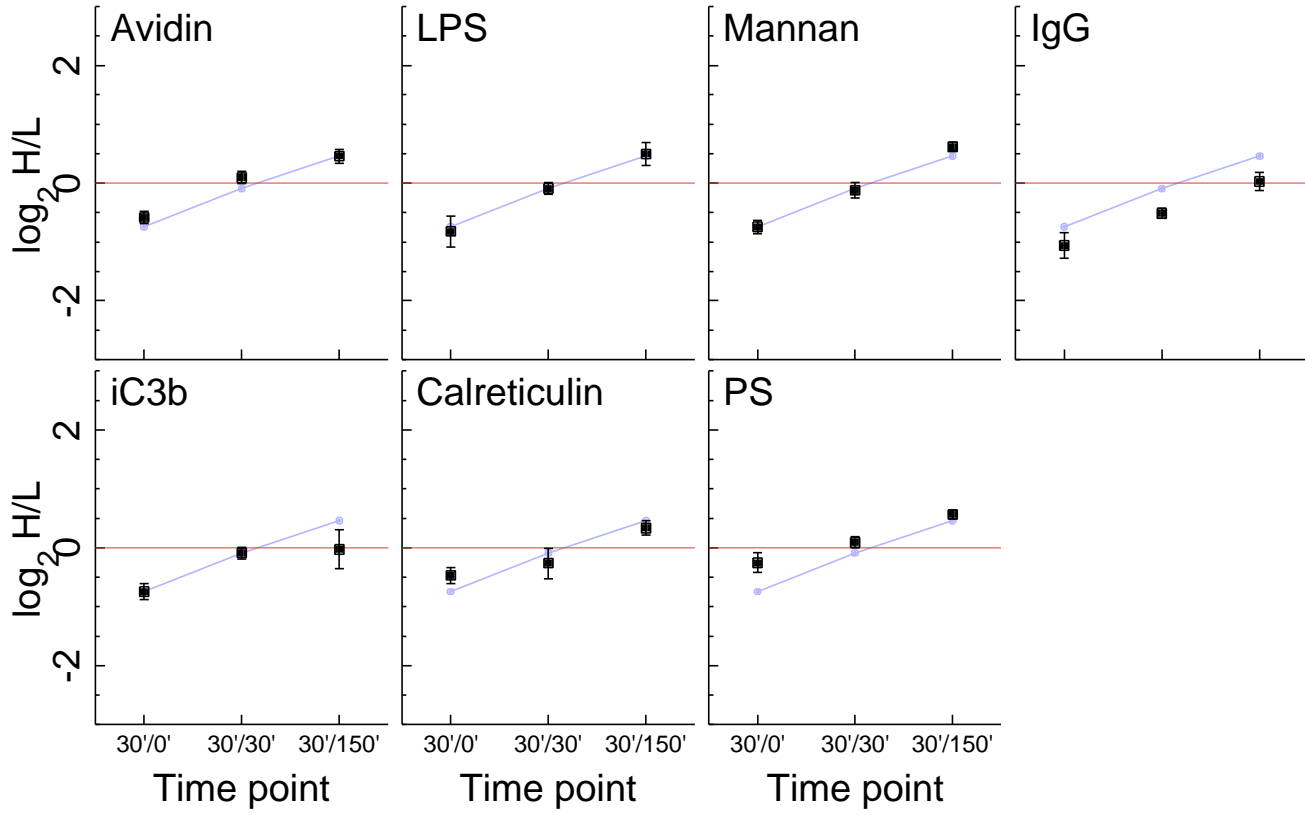

### slc31a2 (Q9CPU9)

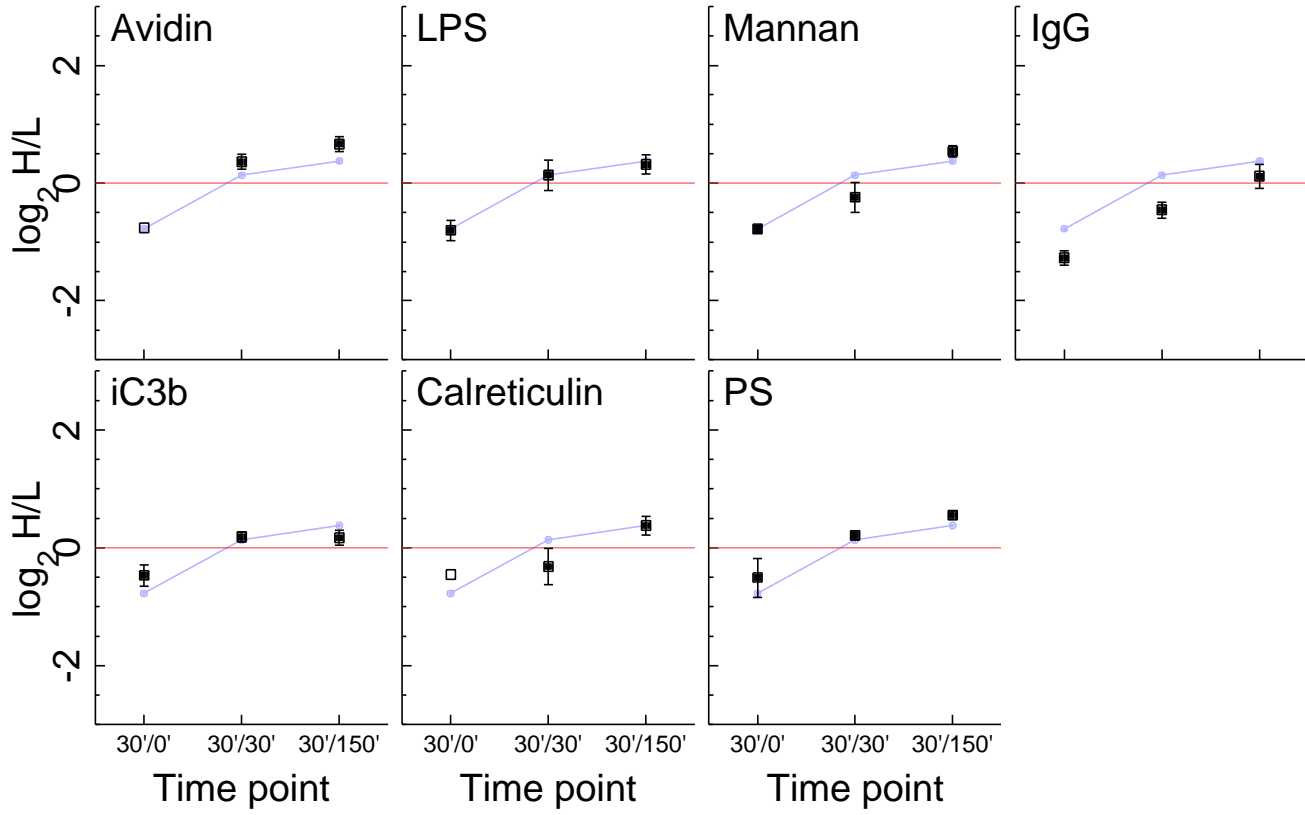

slc36a1 (Q8K4D3)

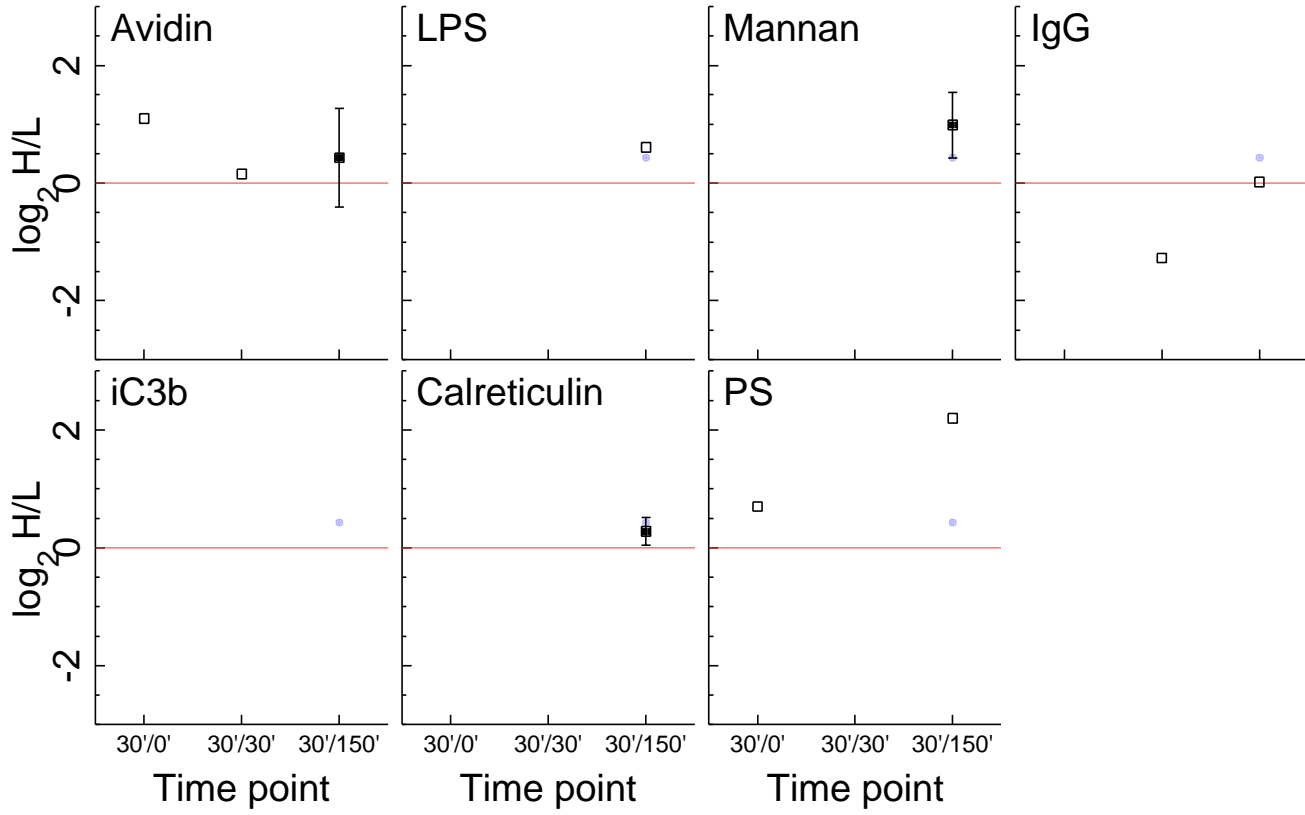



### slc37a2 (Q9WU81)

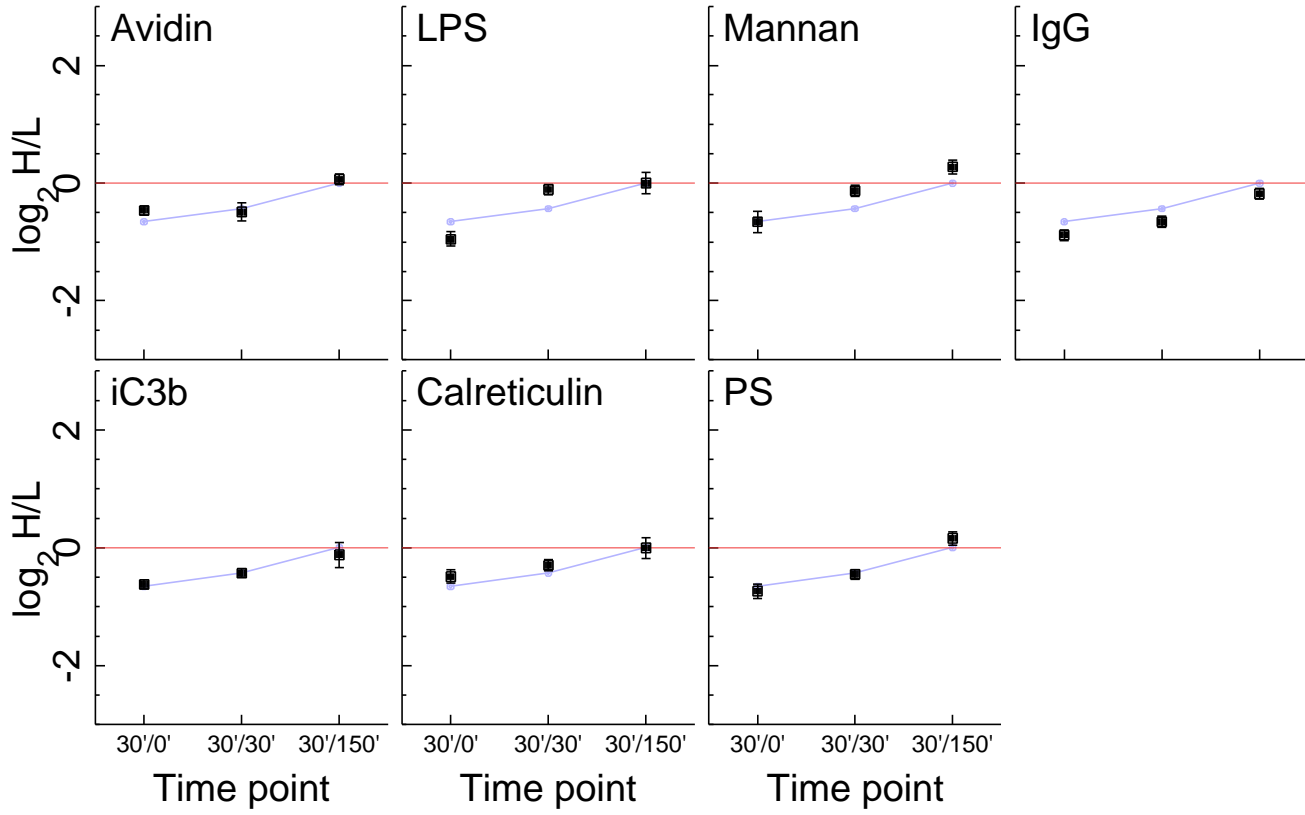

### slc38a2 (Q8CFE6)

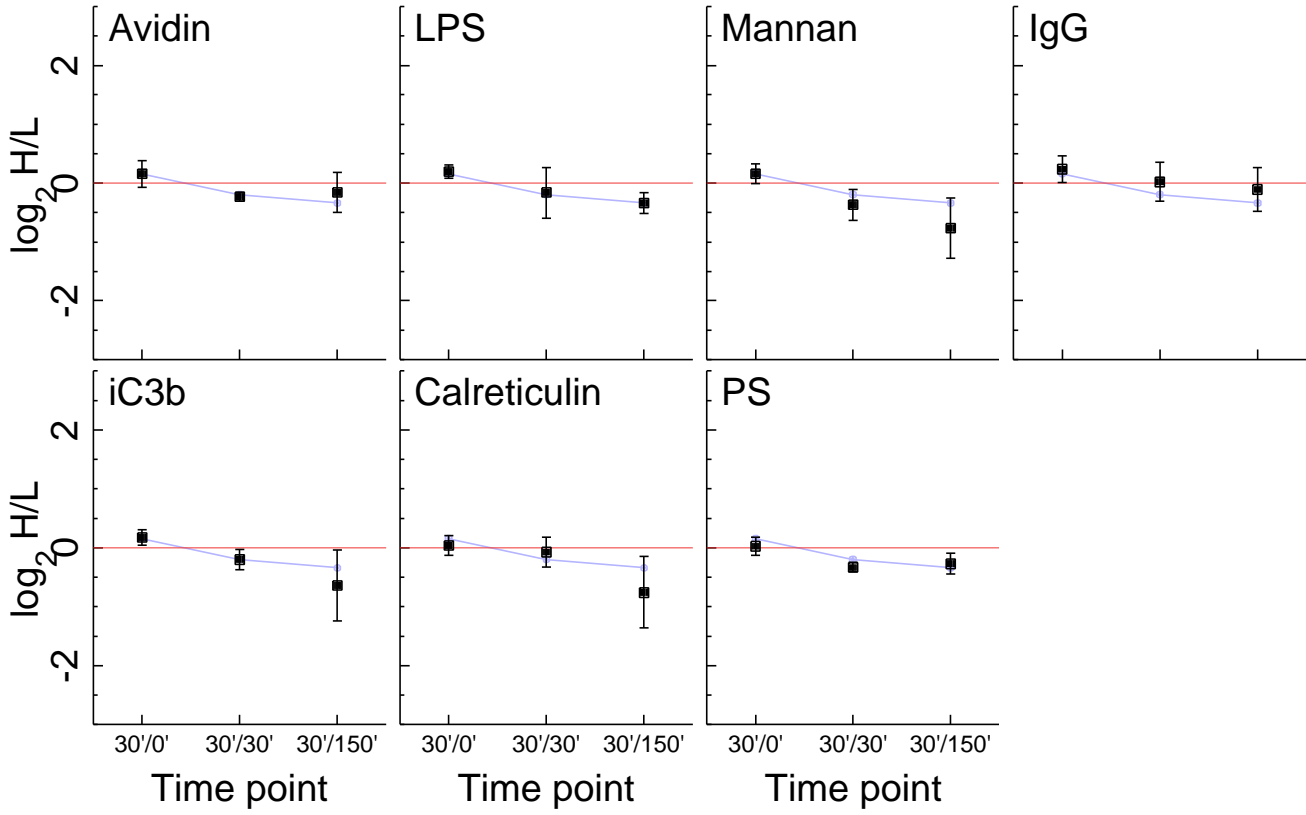

### slc38a7 (Q8BWH0)

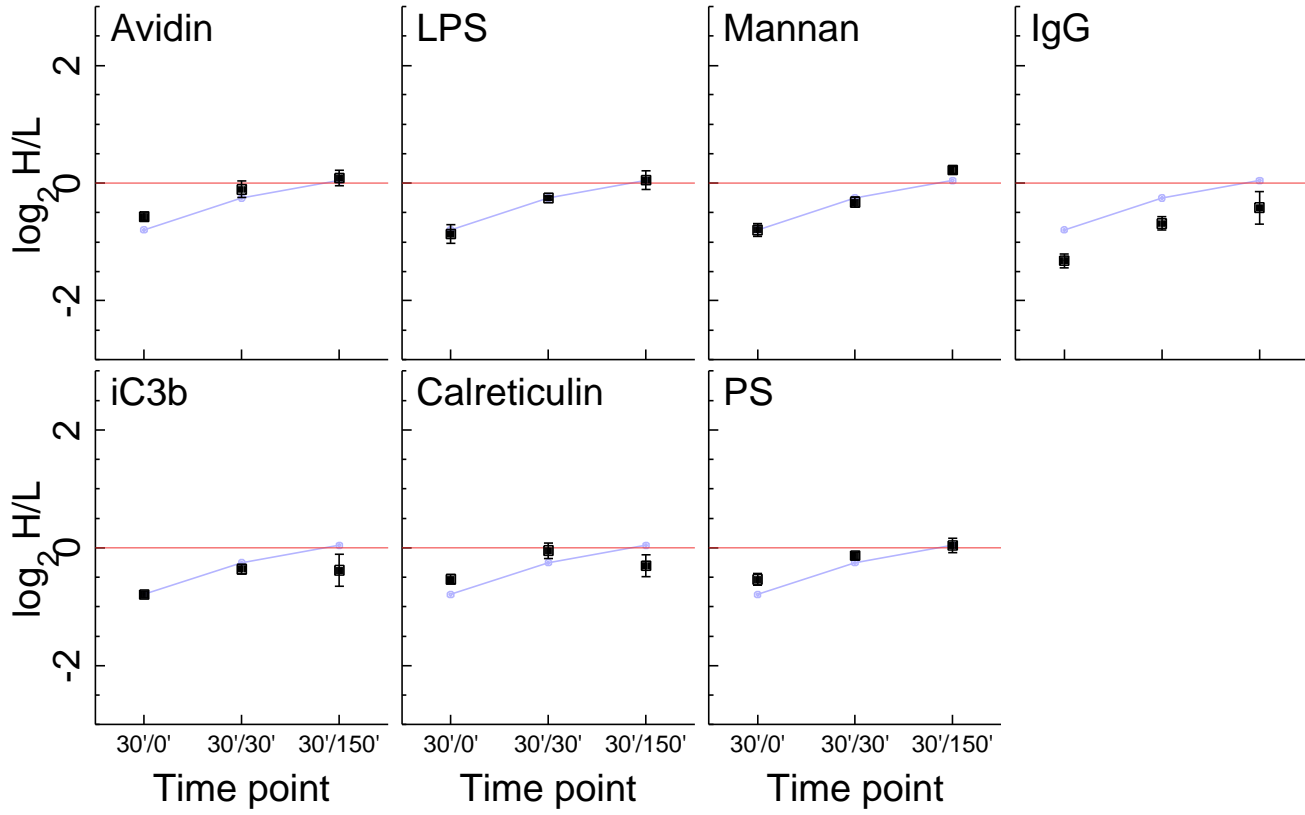

### slc38a9 (Q8BGD6)

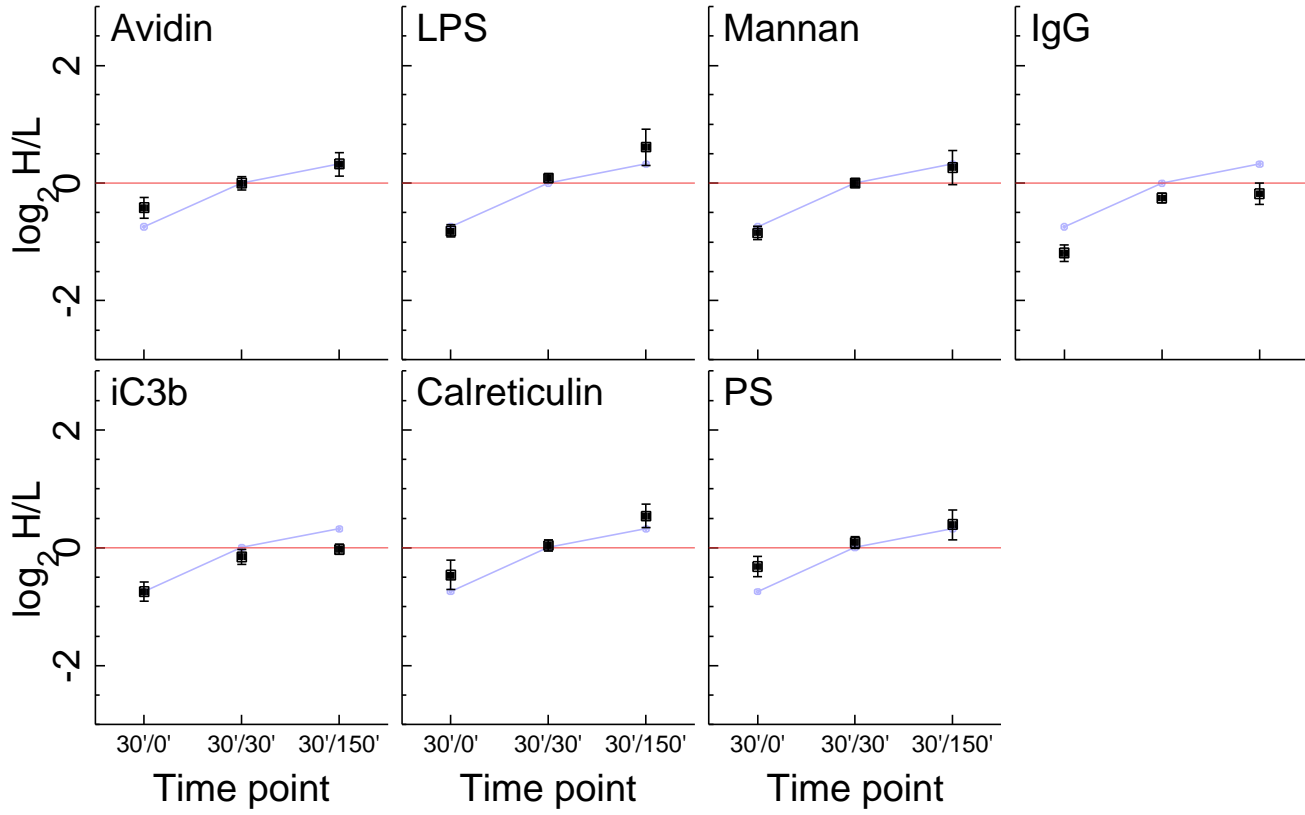

slc39a1 (Q9QZ03)

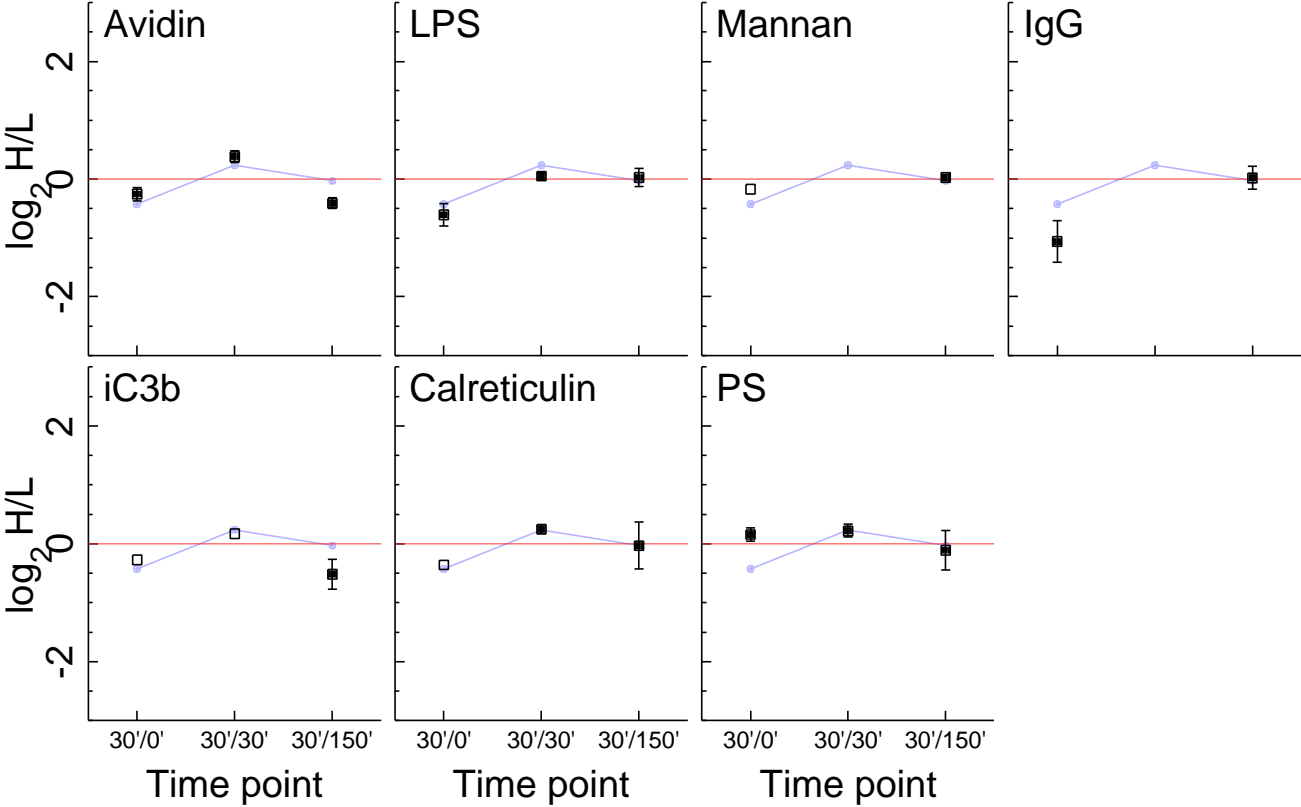

### slc3a2 (G3UWA6)

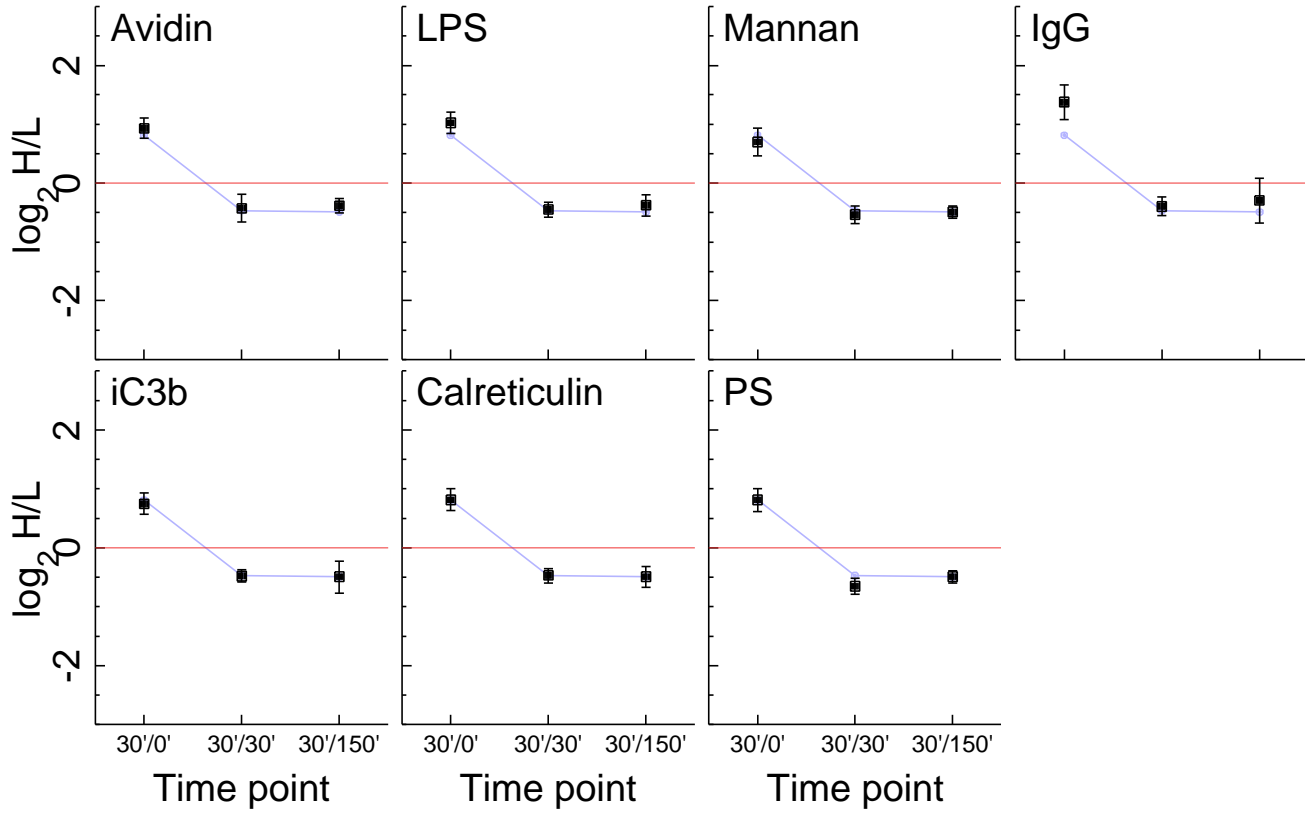

### slc43a2 (Q8CGA3)

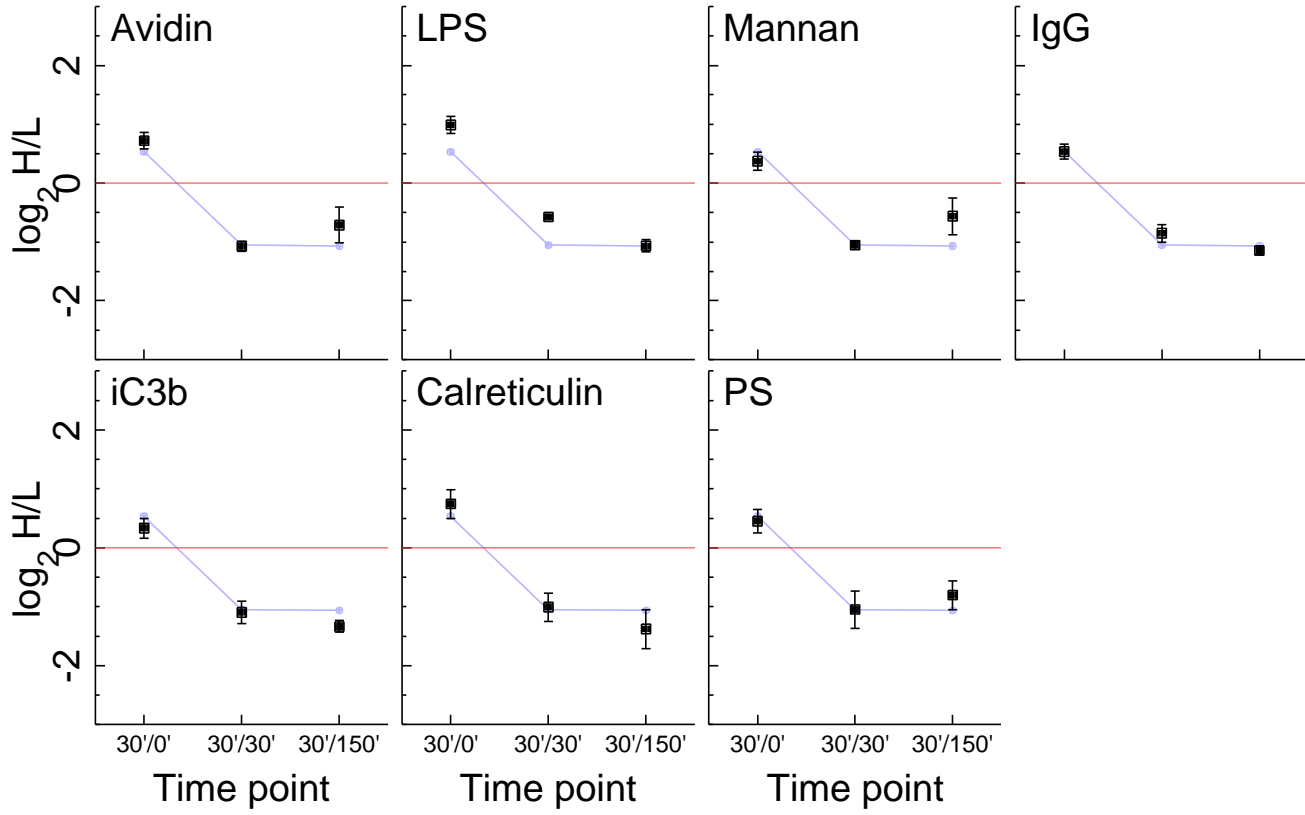

### slc44a2 (Q8BY89)

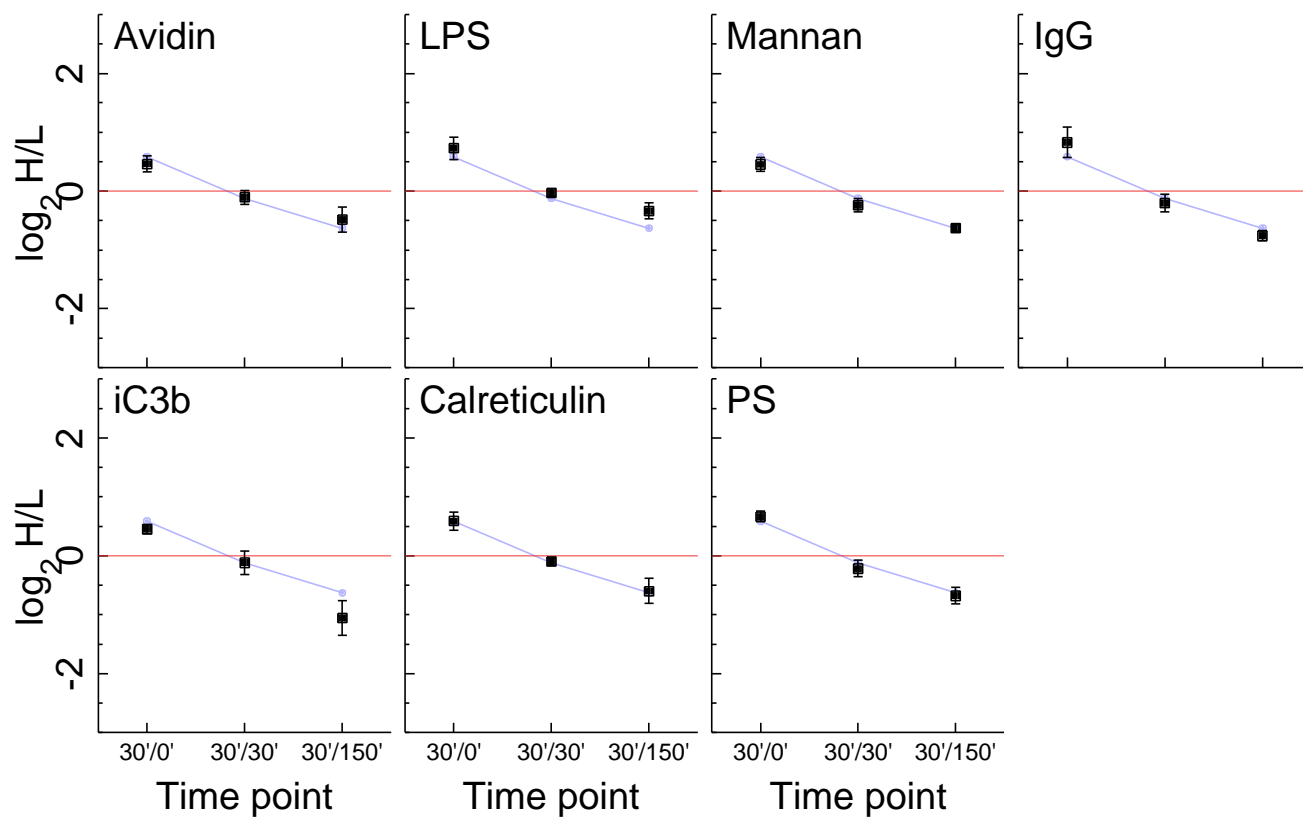



slc46a3 (Q9DC26)

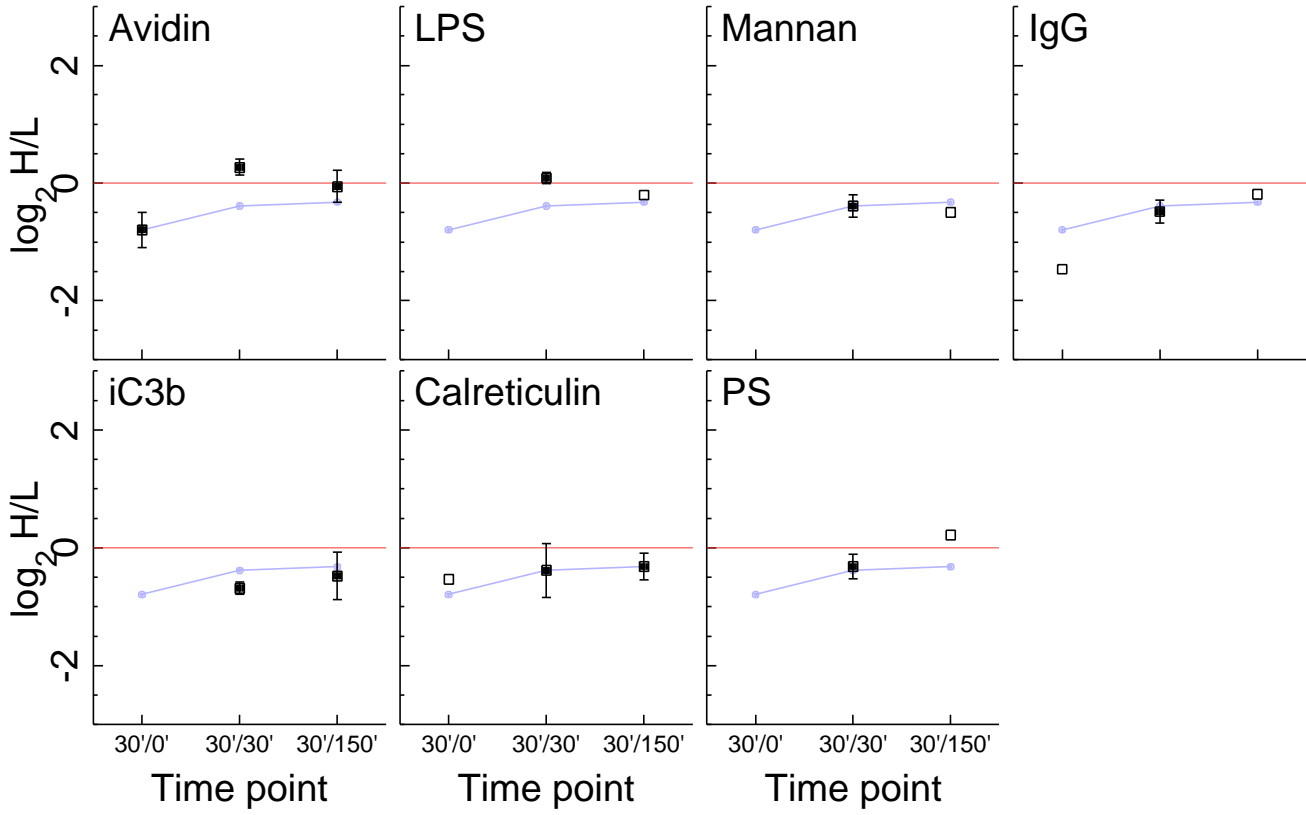

### slc48a1 (Q9D8M3)

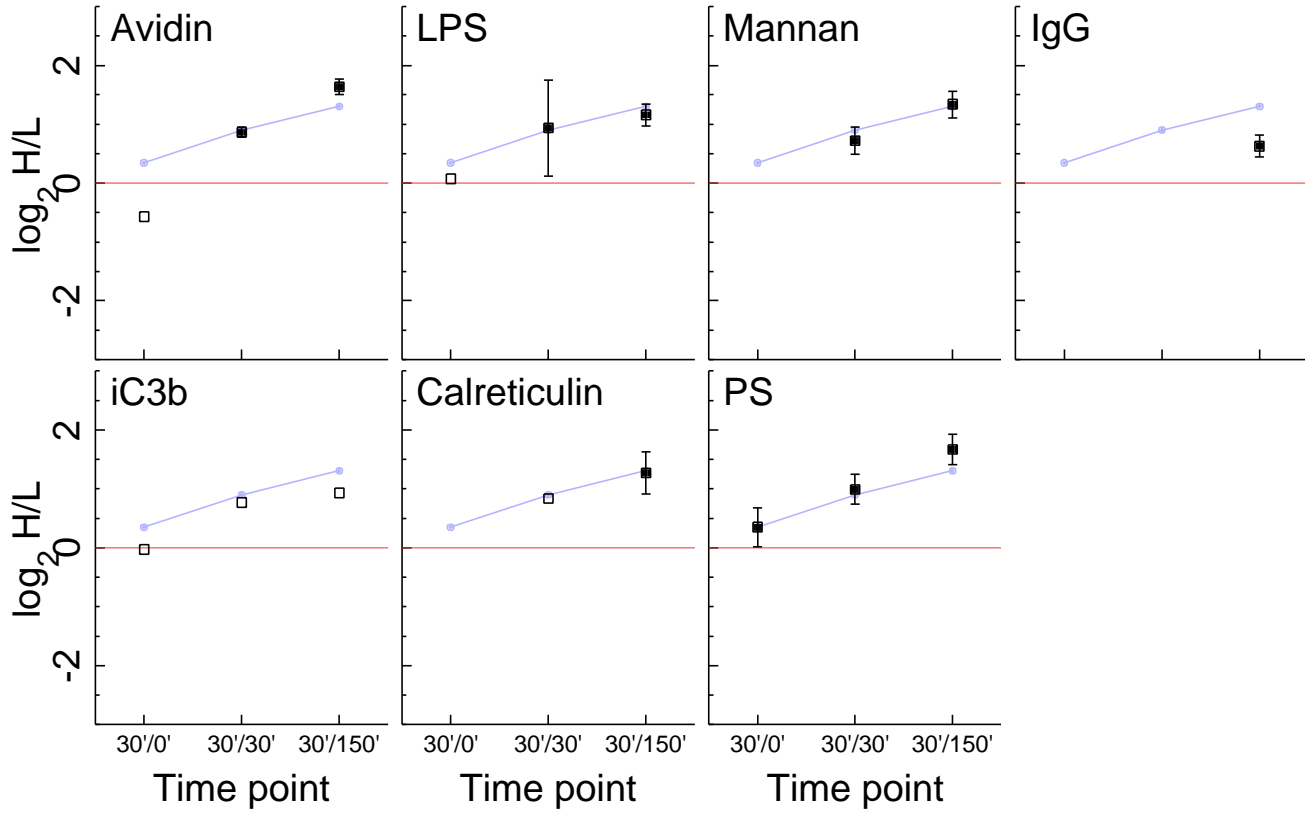

### slc4a2 (P13808)

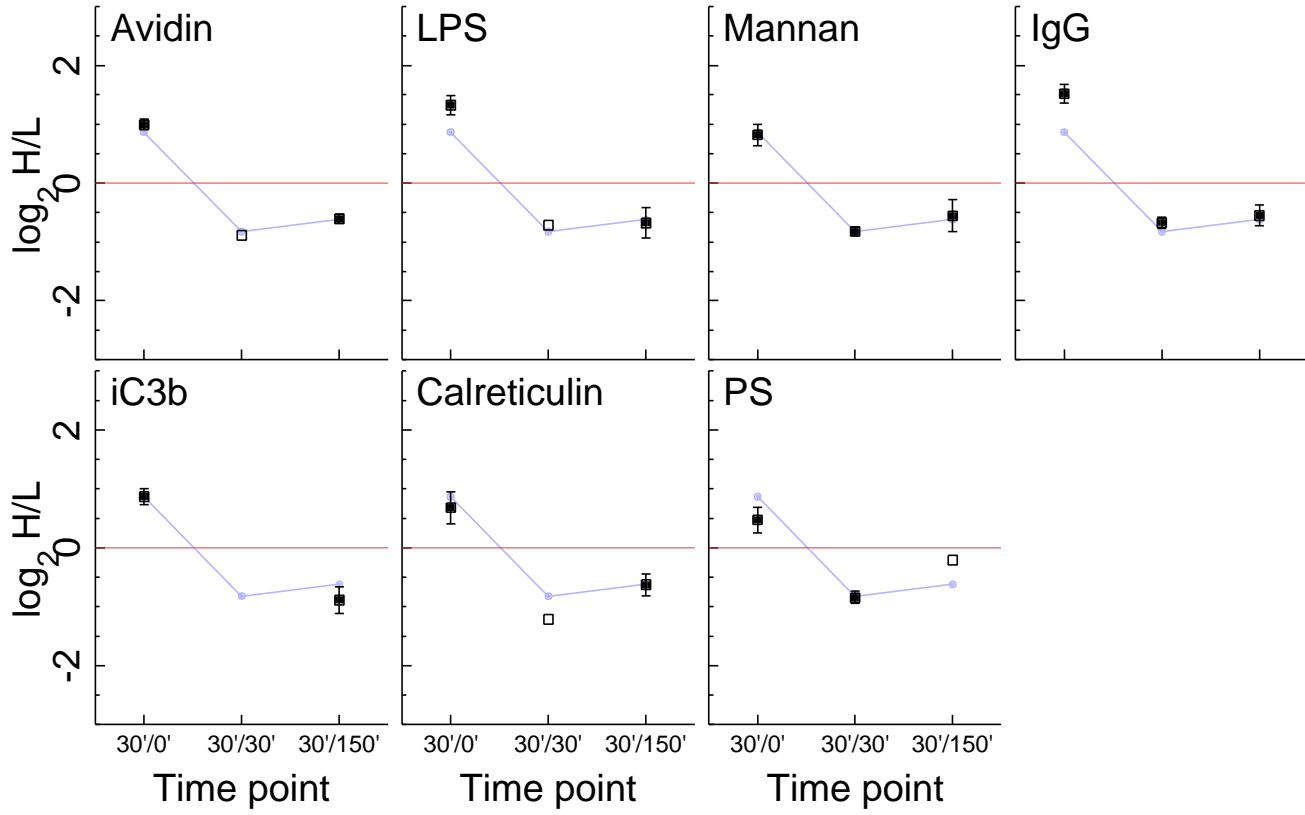

### slc4a7 (F8VQC9)

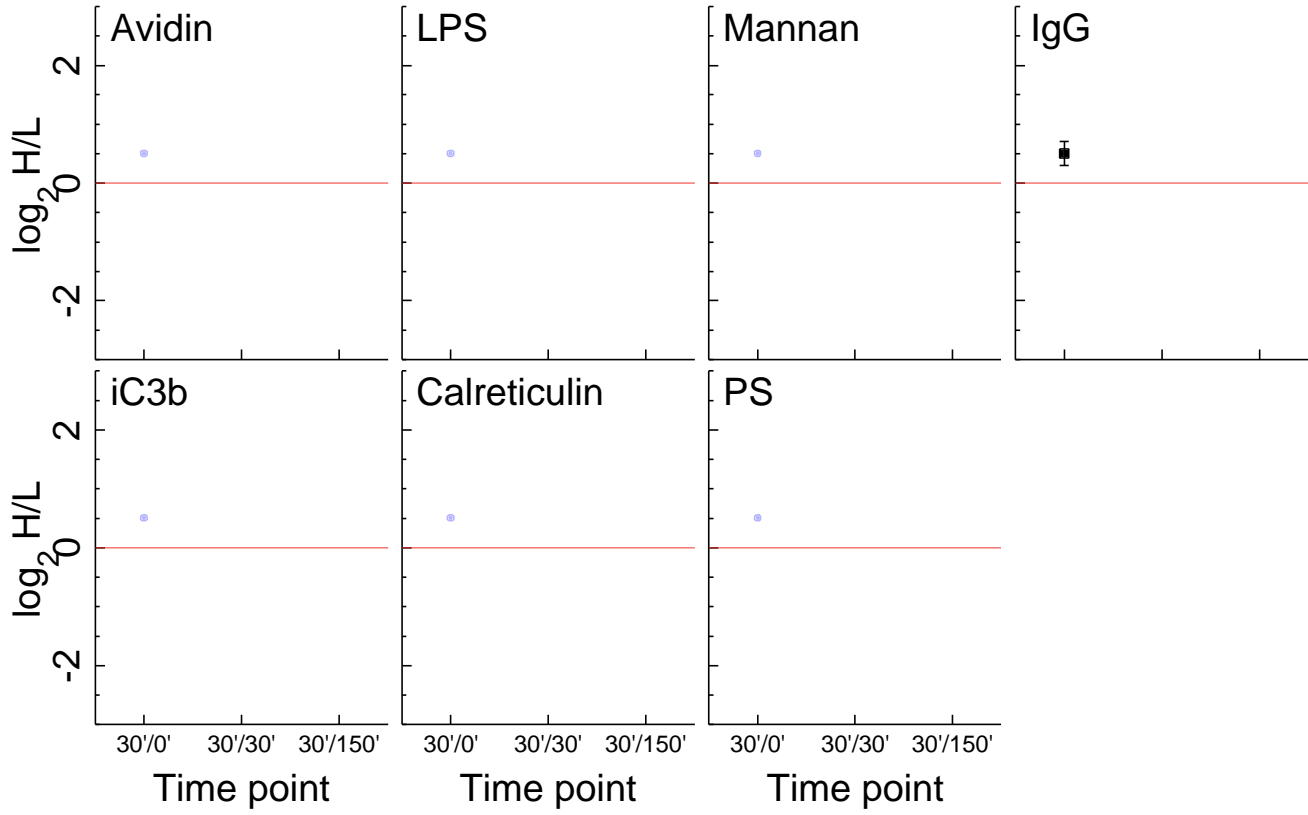

slc6a6 (O35316)

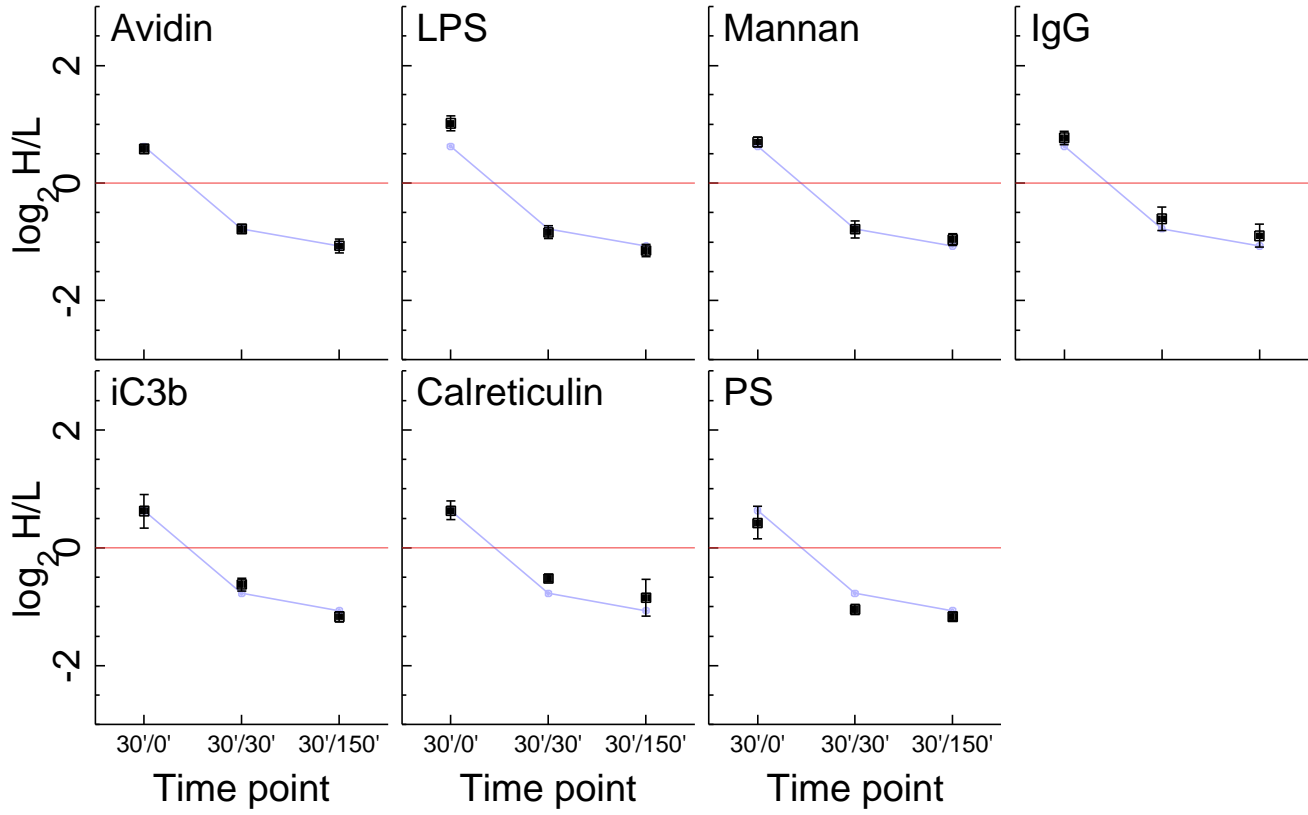

### slc7a1 (Q09143)

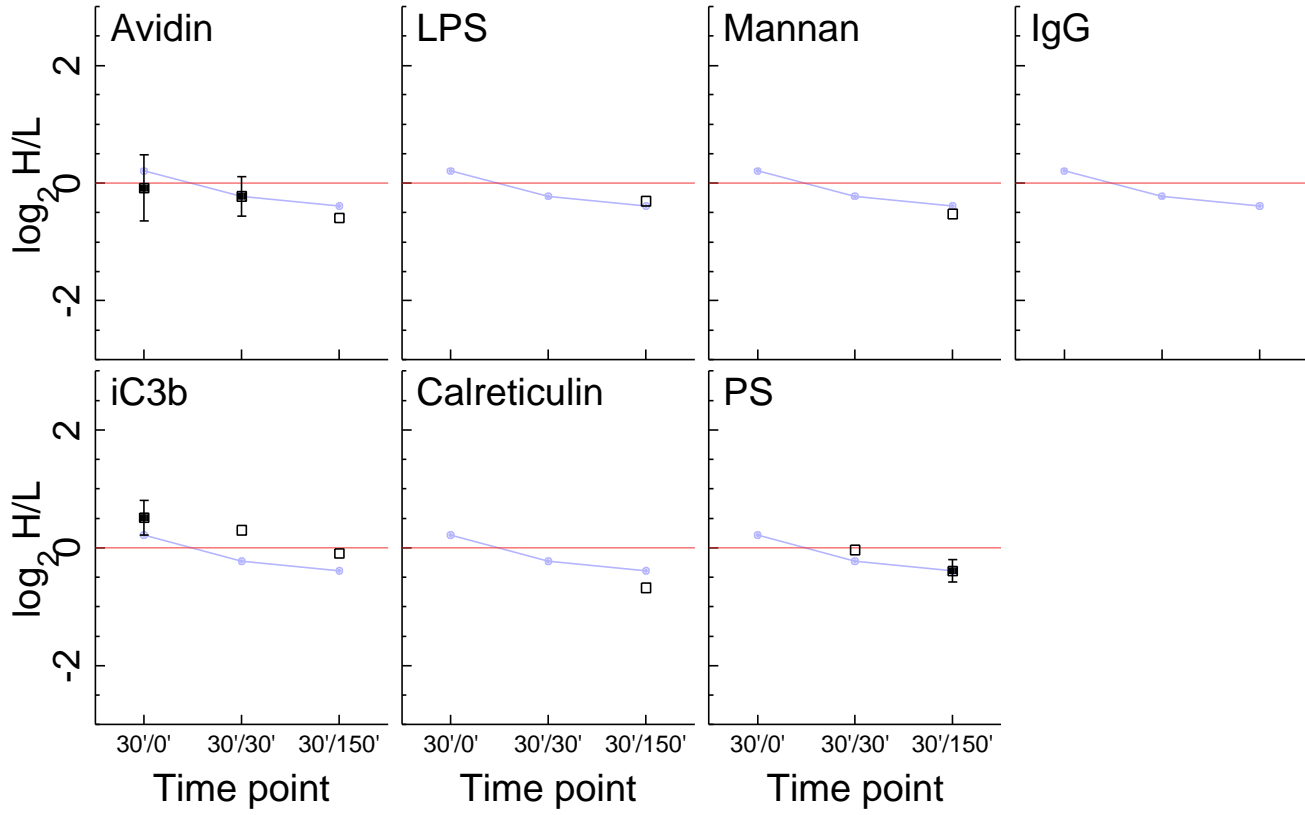

slc7a5 (Q9Z127)

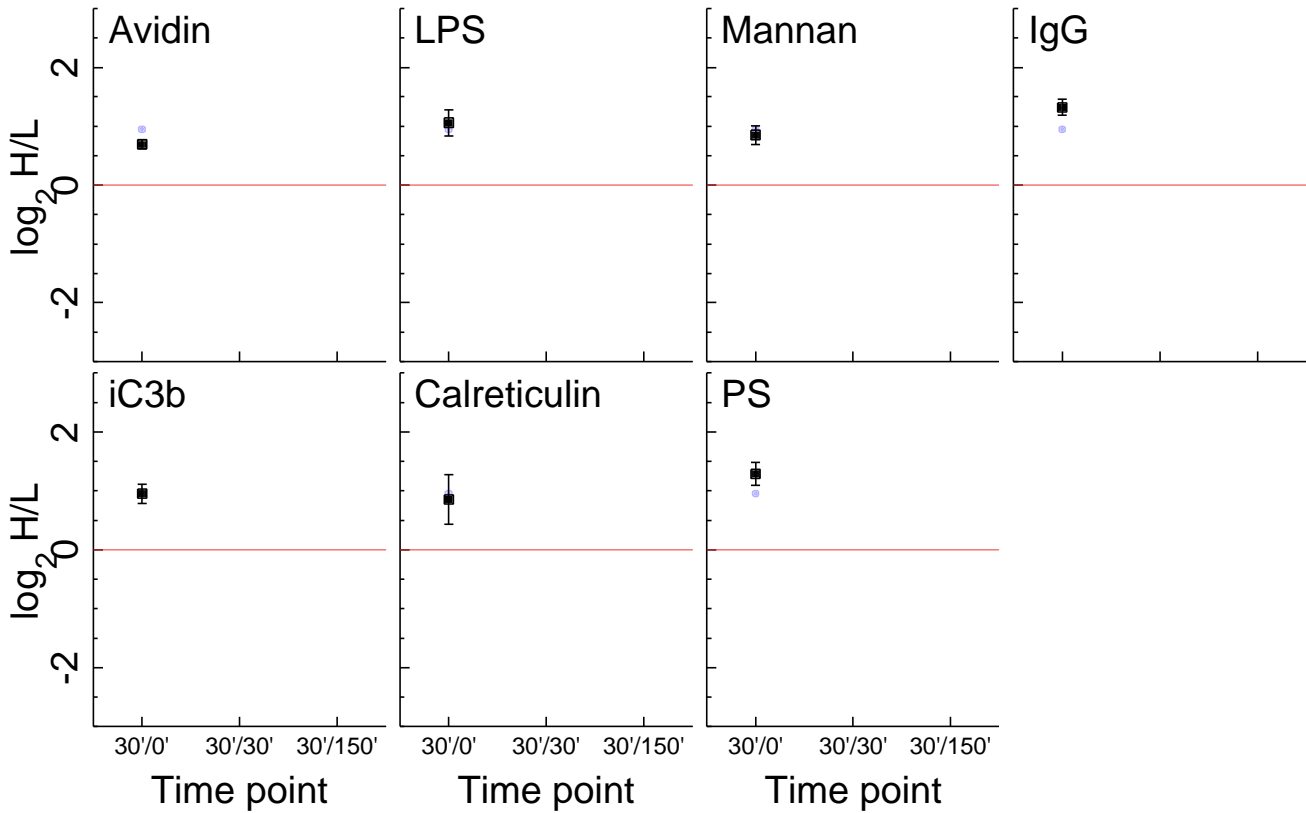

### slc7a8 (Q9QXW9)

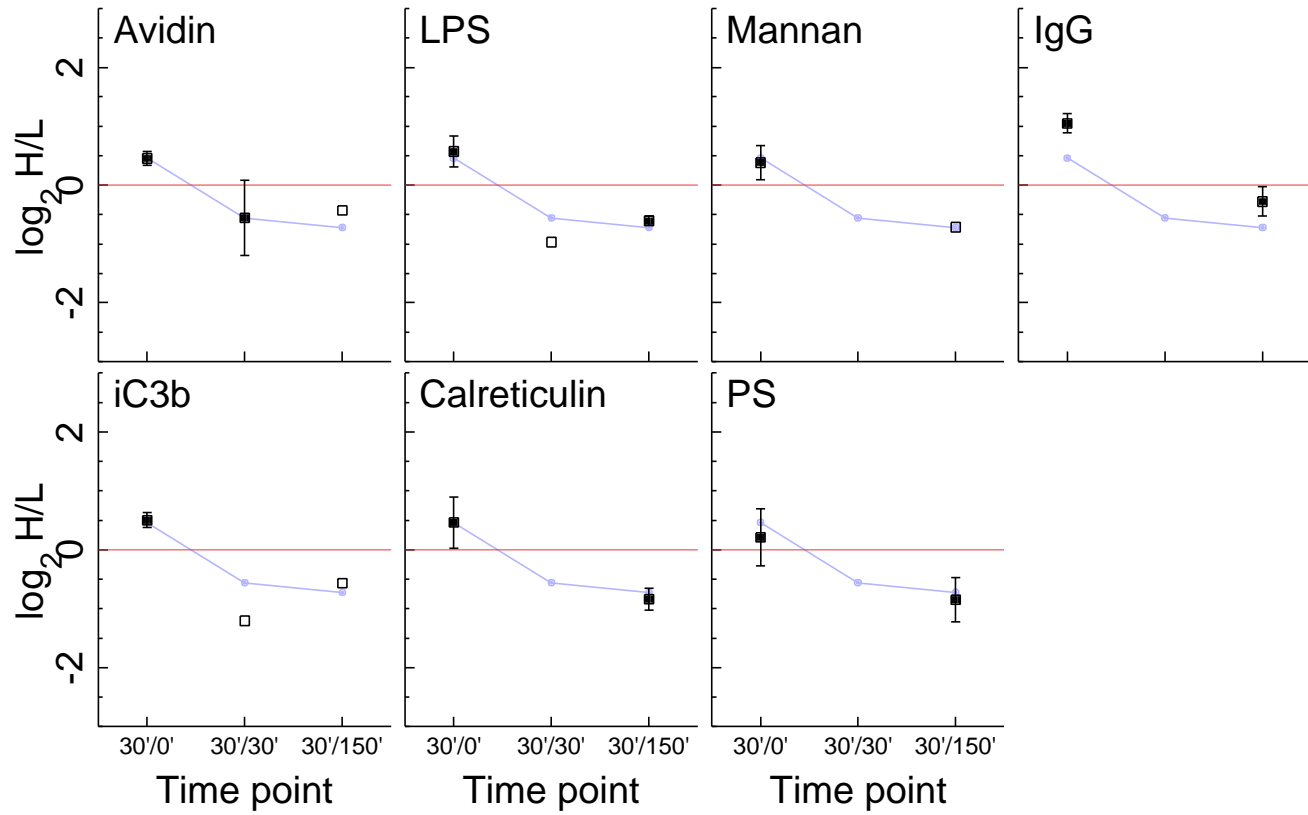



slc9a6 (A1L3P4)

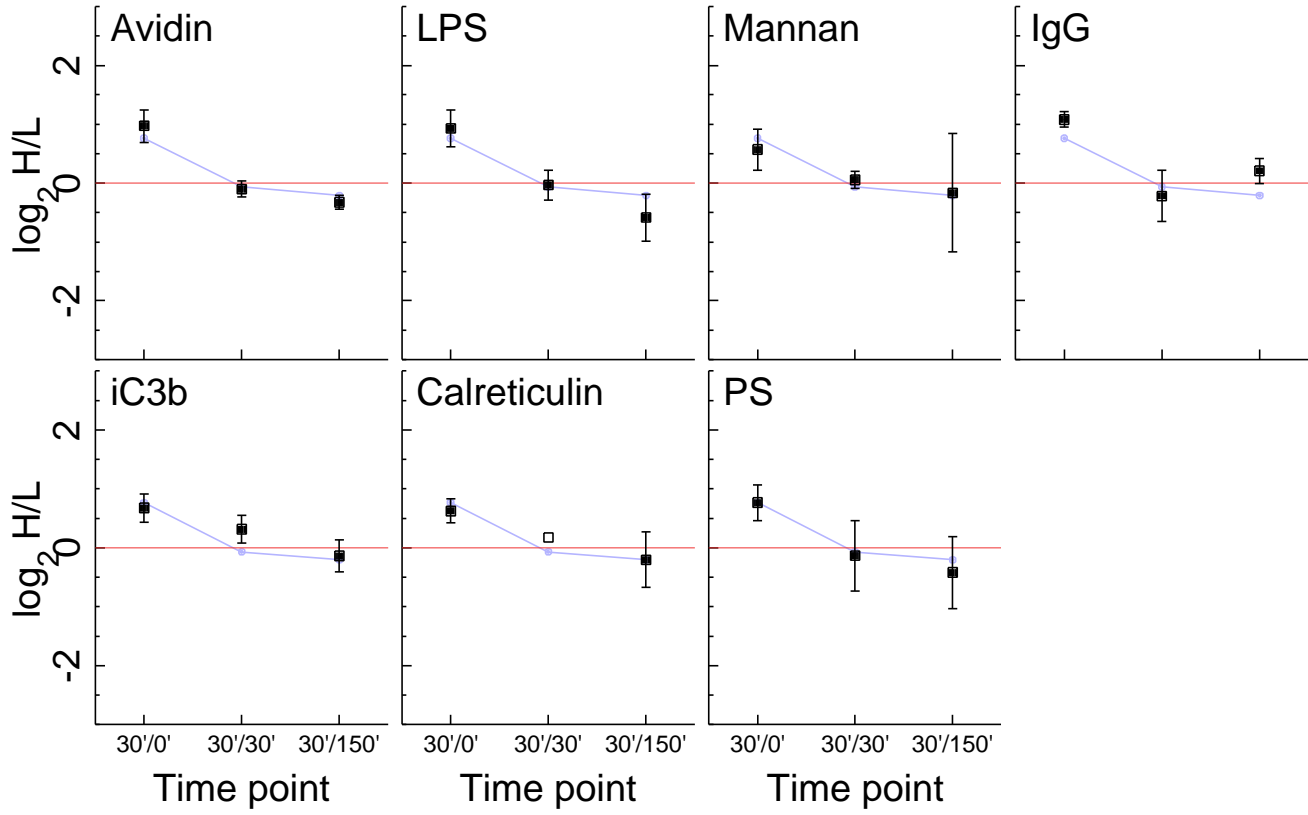

slc9a9 (Q8BZ00)

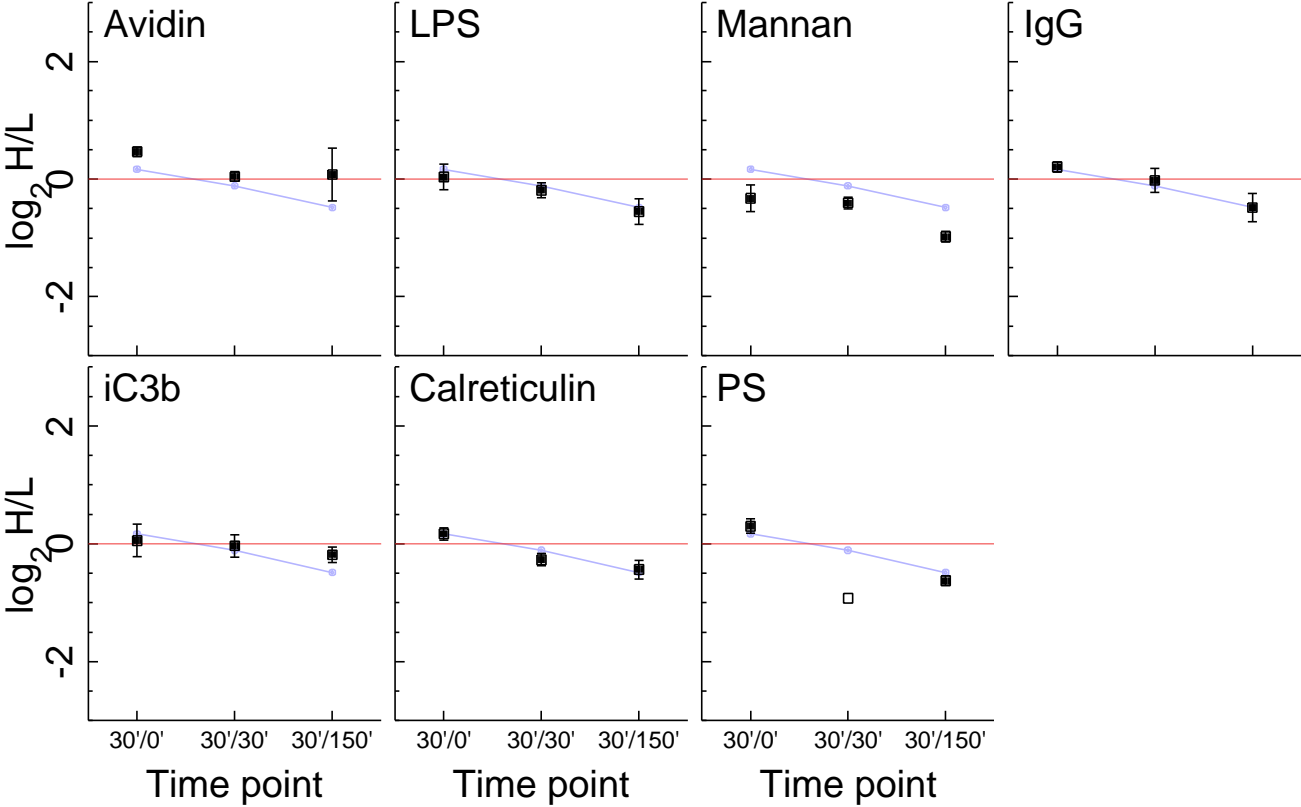

### slco4a1 (Q8K078)

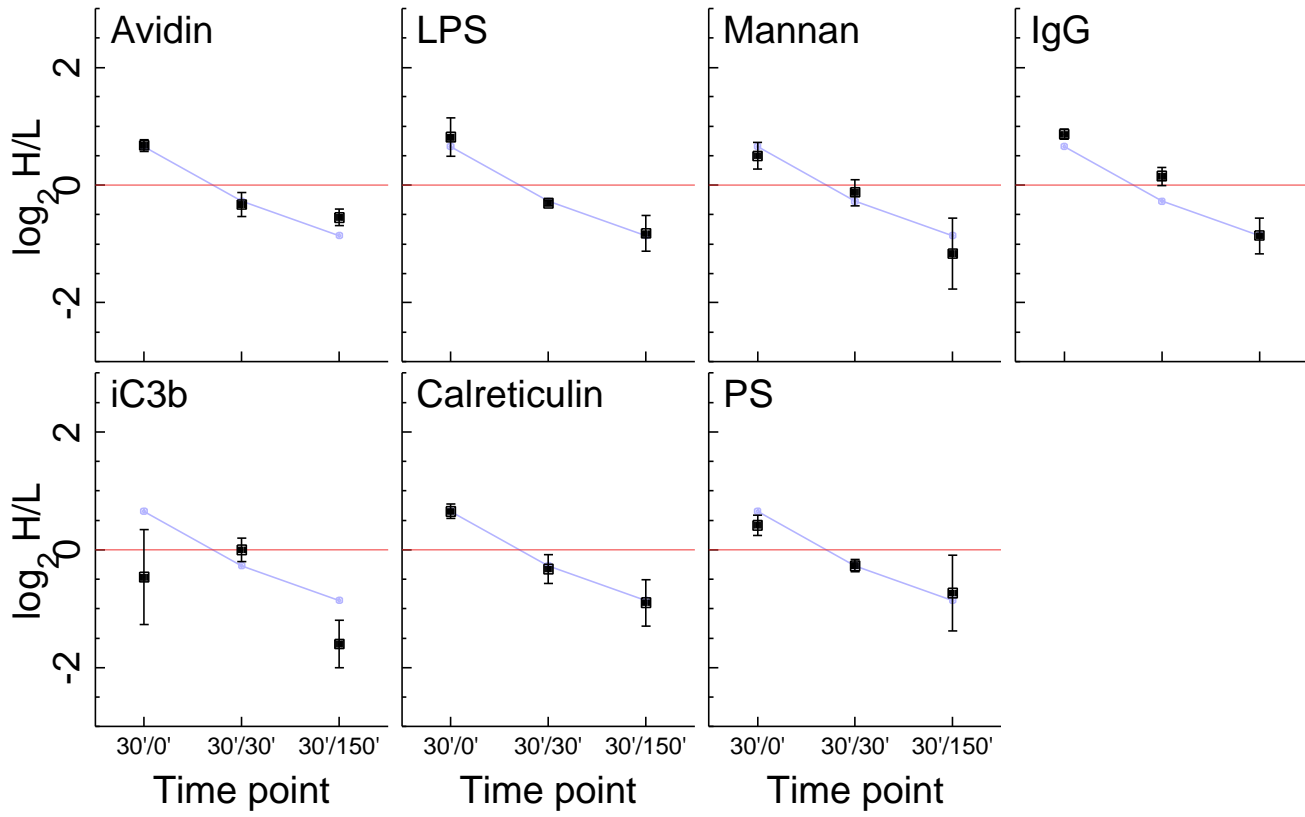

### smap1 (Q91VZ6)

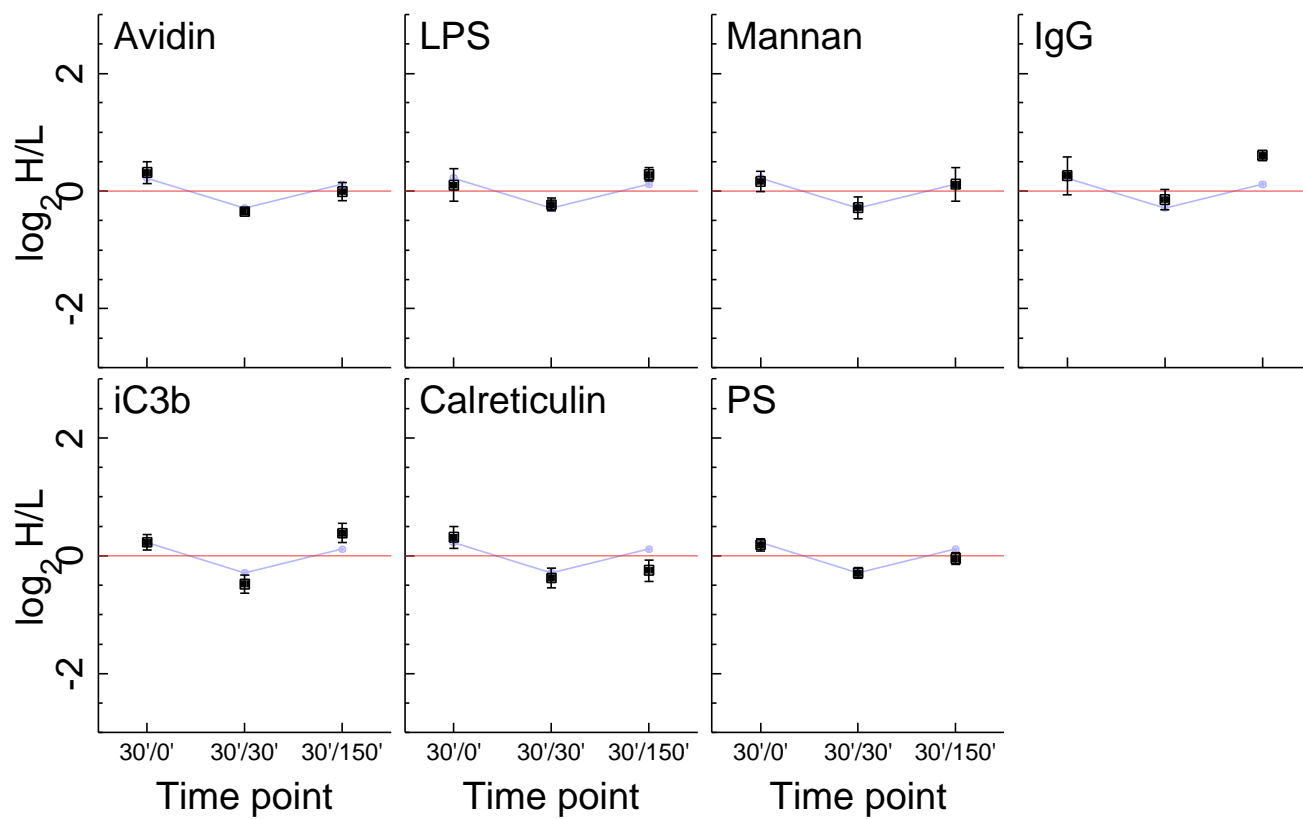

### smap2 (Q7TN29)

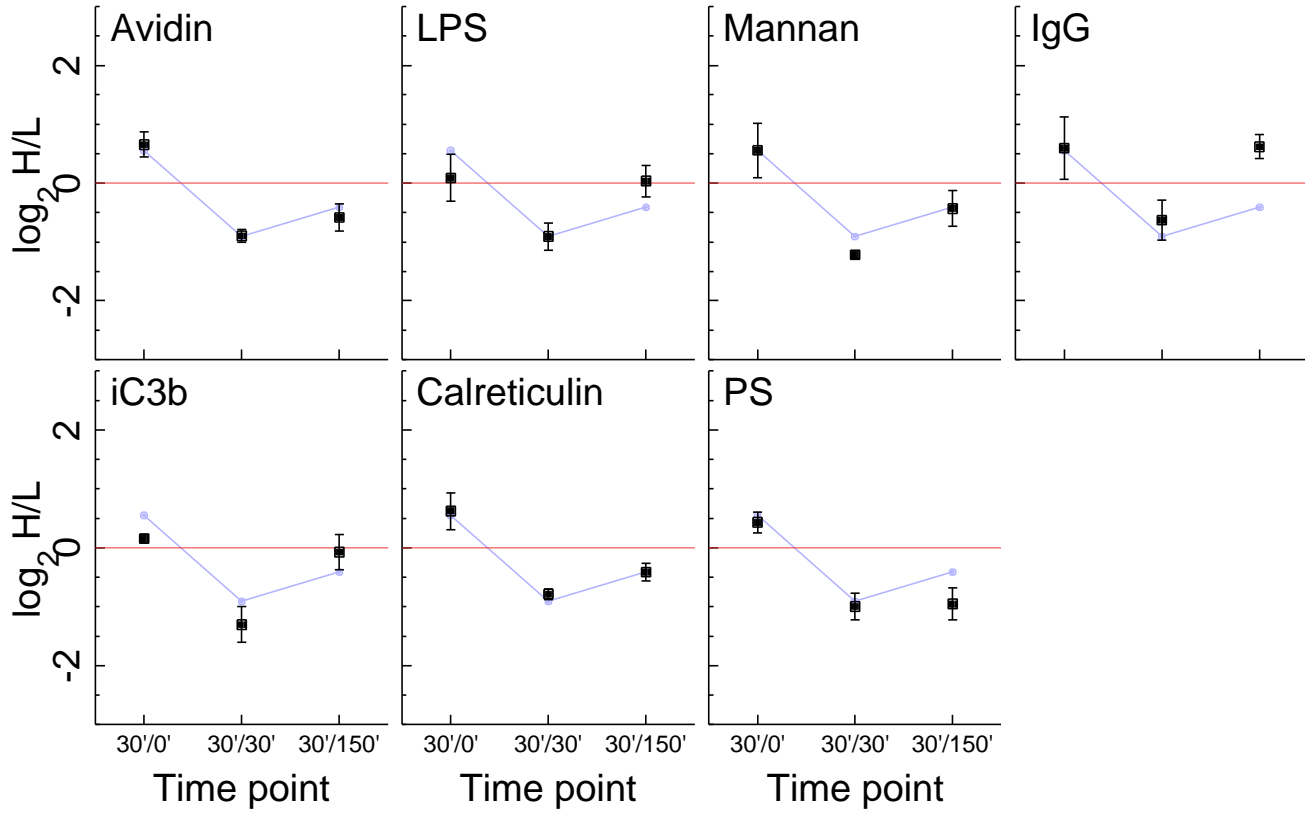

### smarca5 (Q91ZW3)

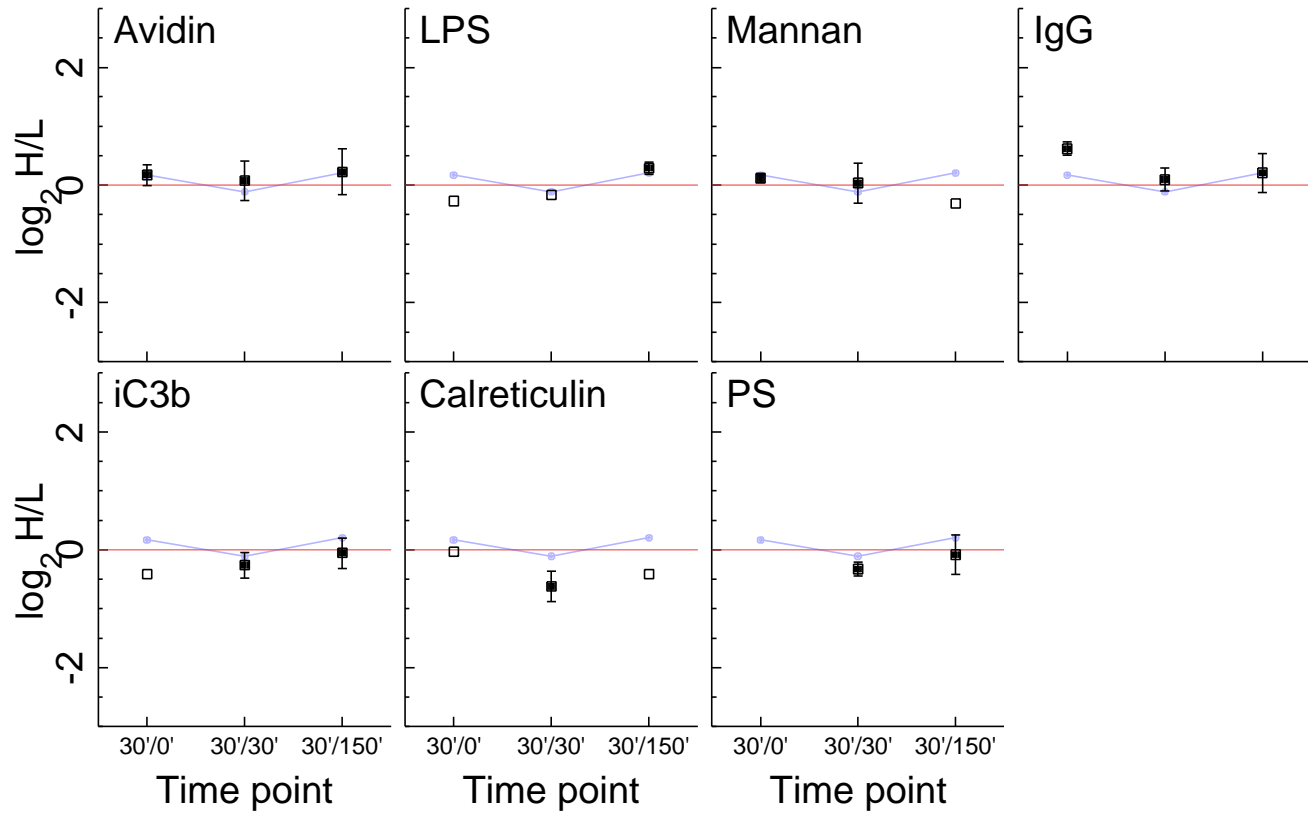

### smarcc2 (Q6PDG5)

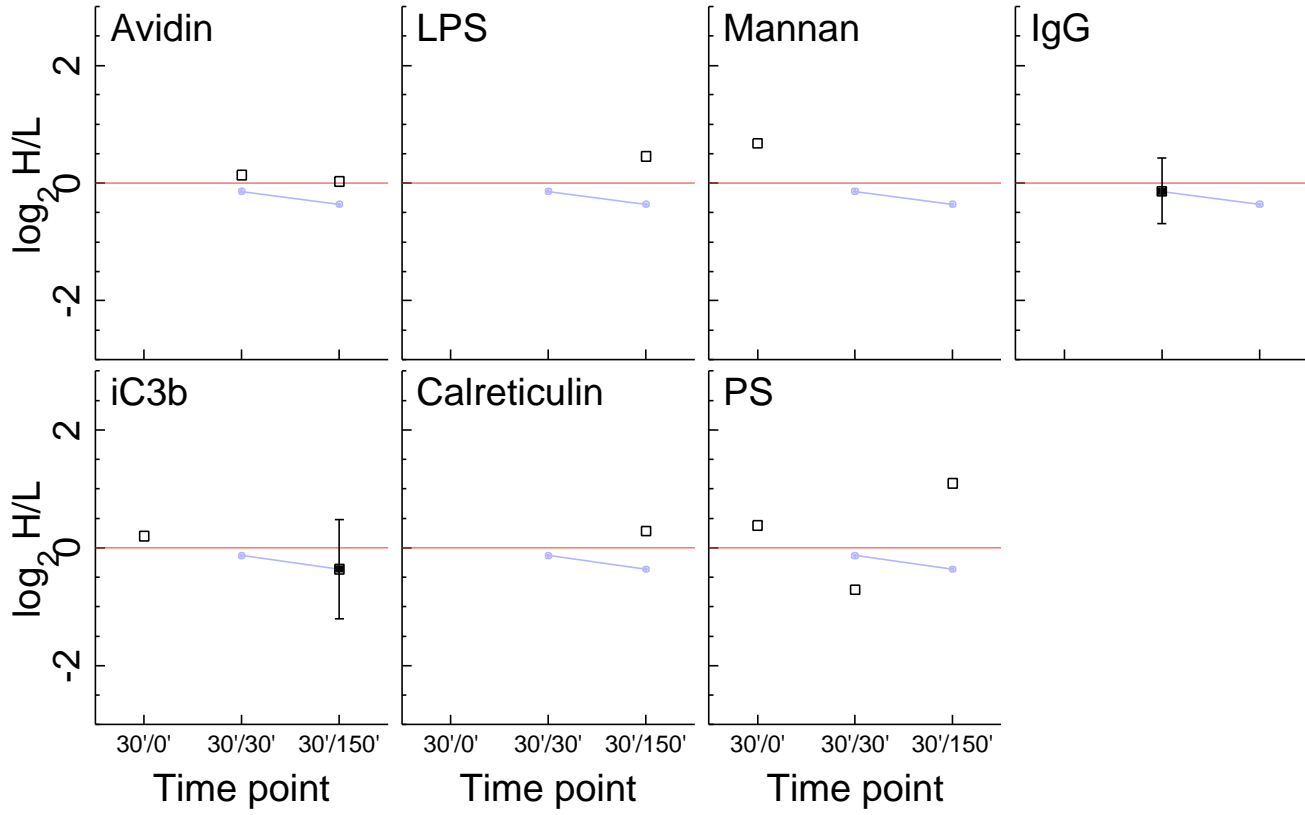

smc1a (Q9CU62)

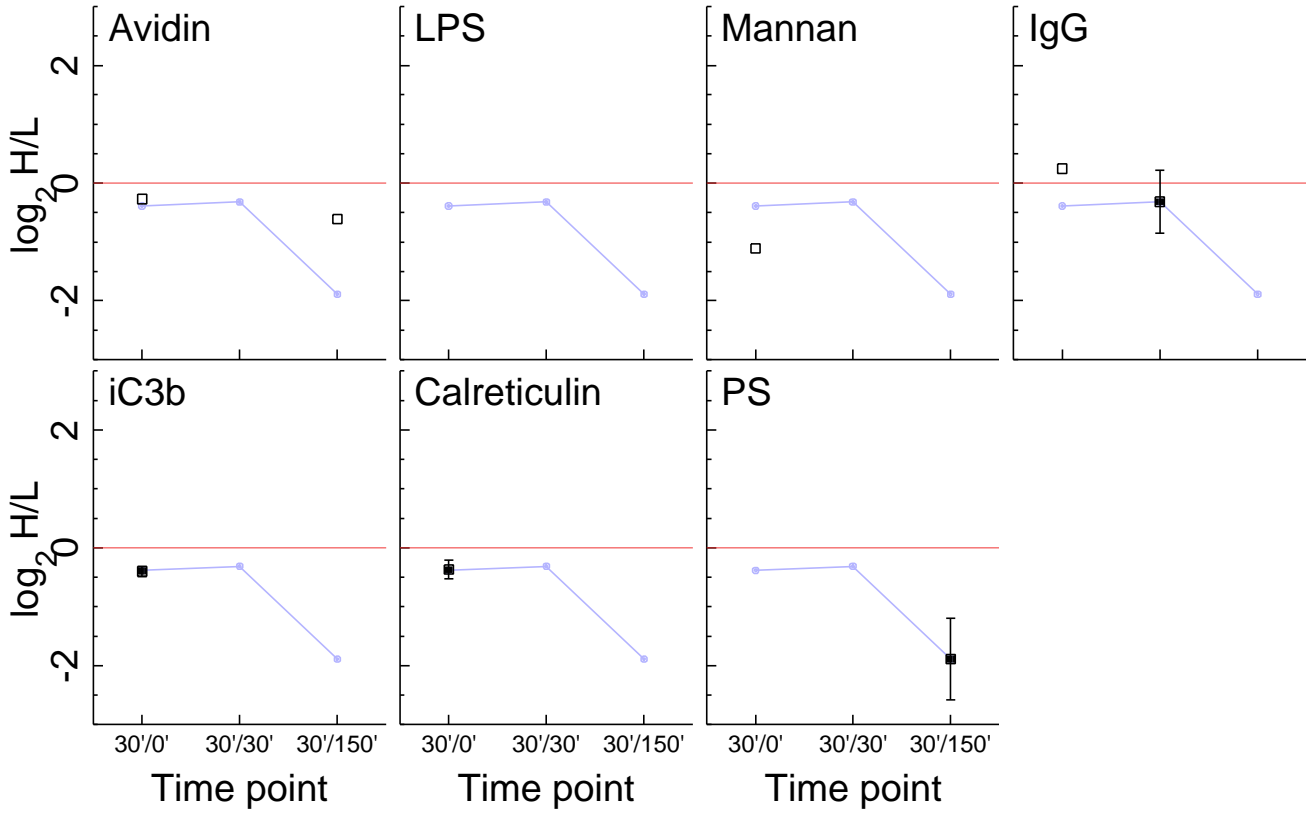



### smc2 (Q8CG48)

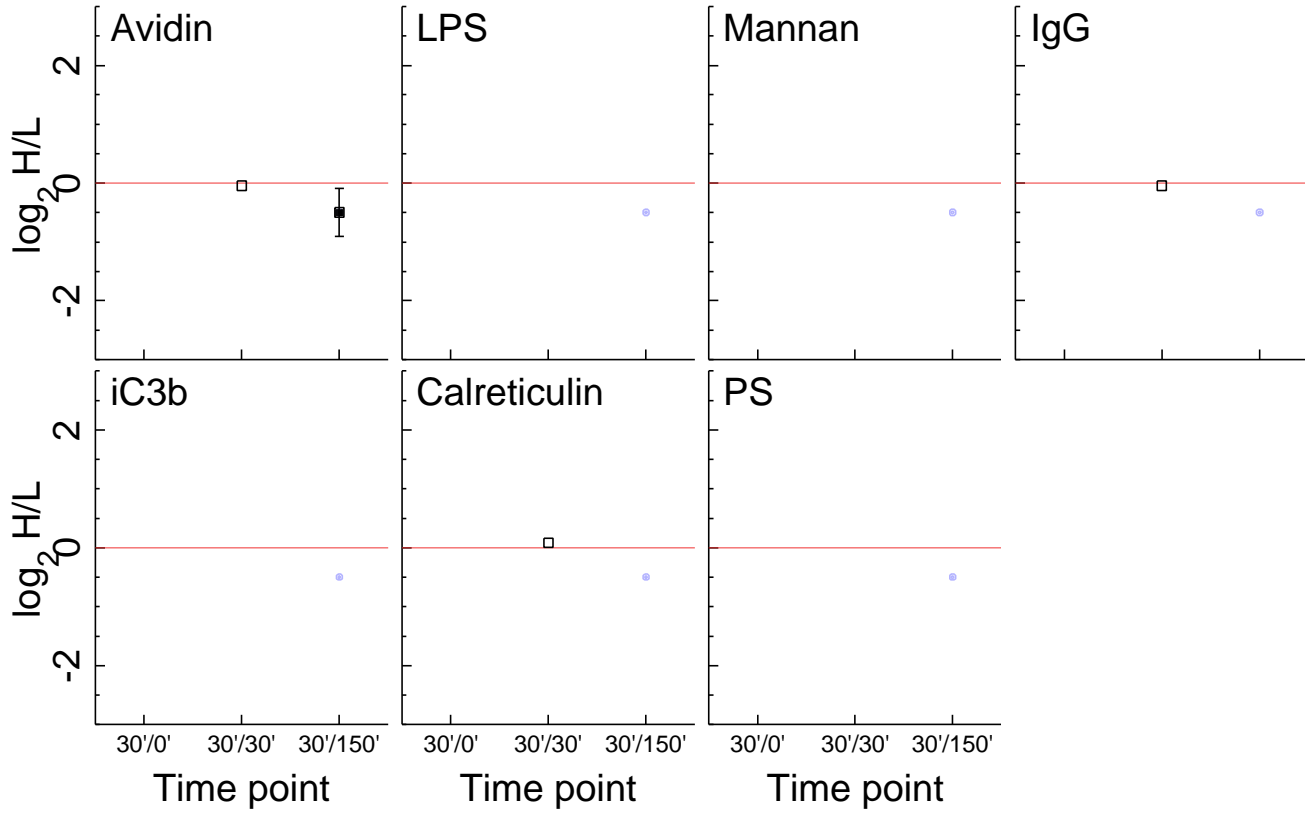

smpd1 (Q04519)

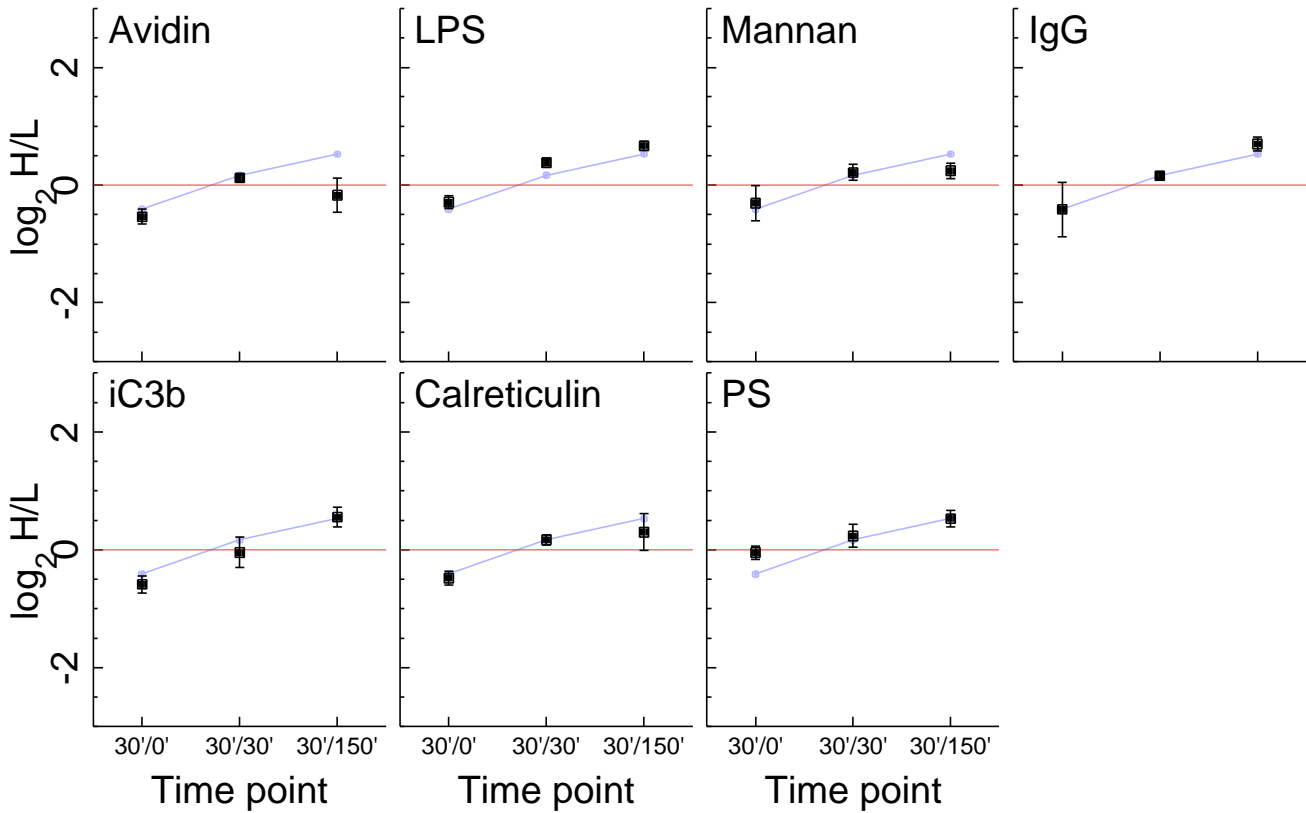

### smpdl3a (P70158)

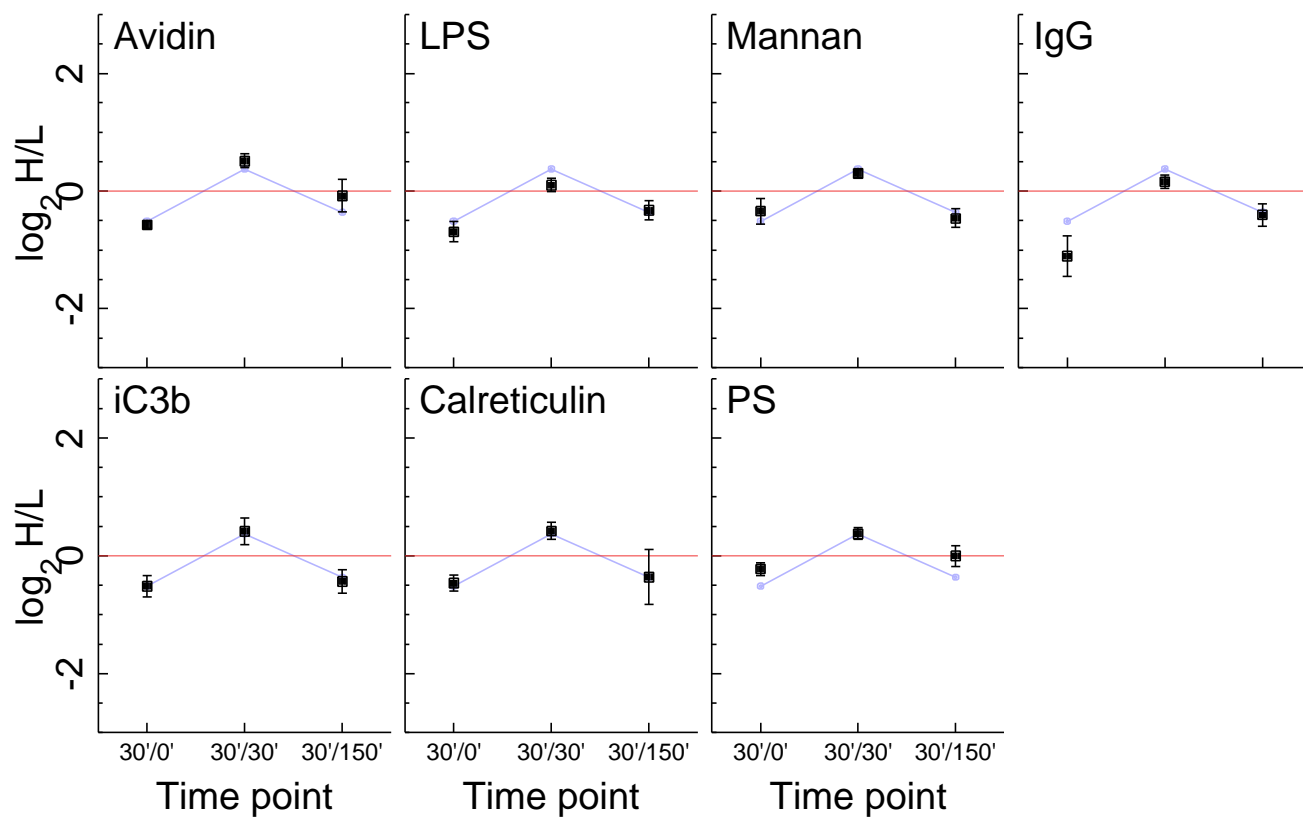

### smpdl3b (P58242)

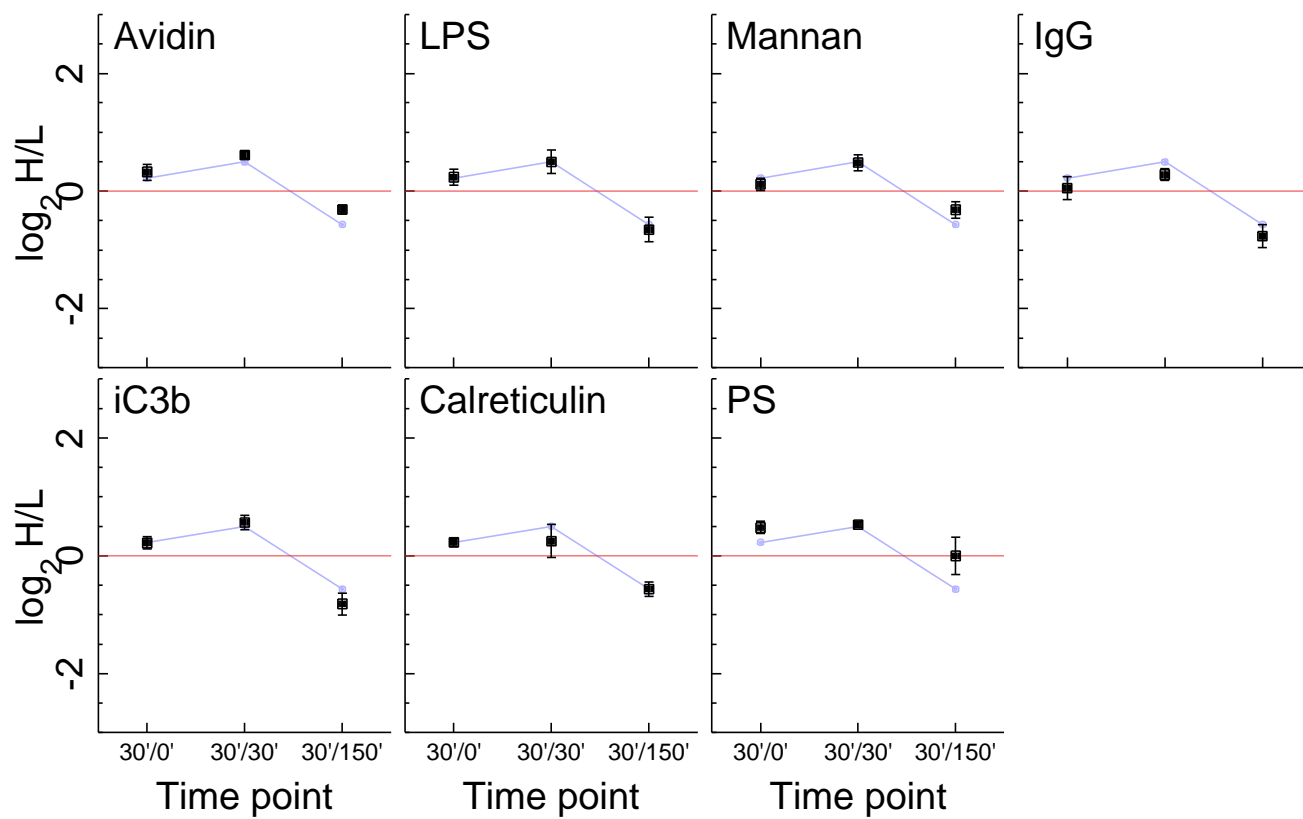

### snap23 (Q9D3L3)

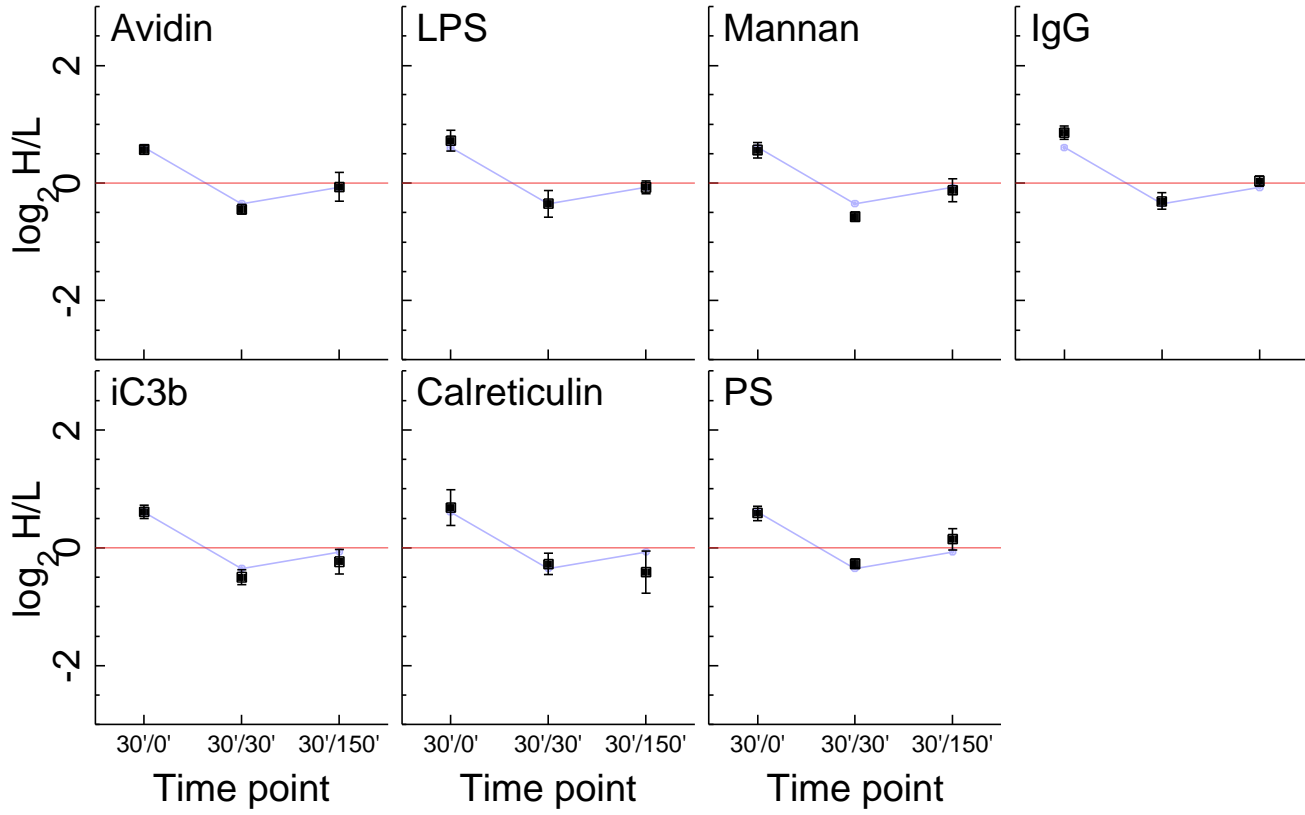

### snap29 (Q9ERB0)

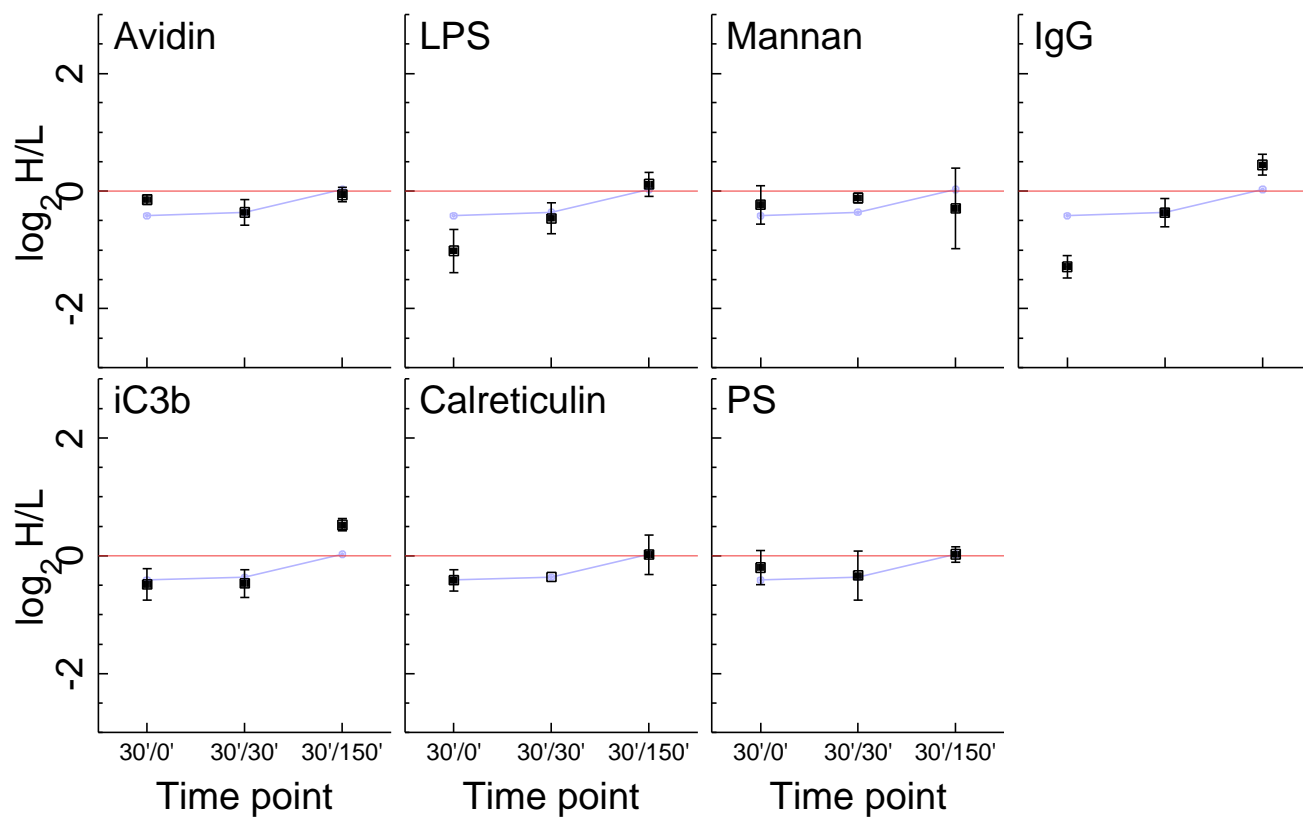

snapin (Q9Z266)

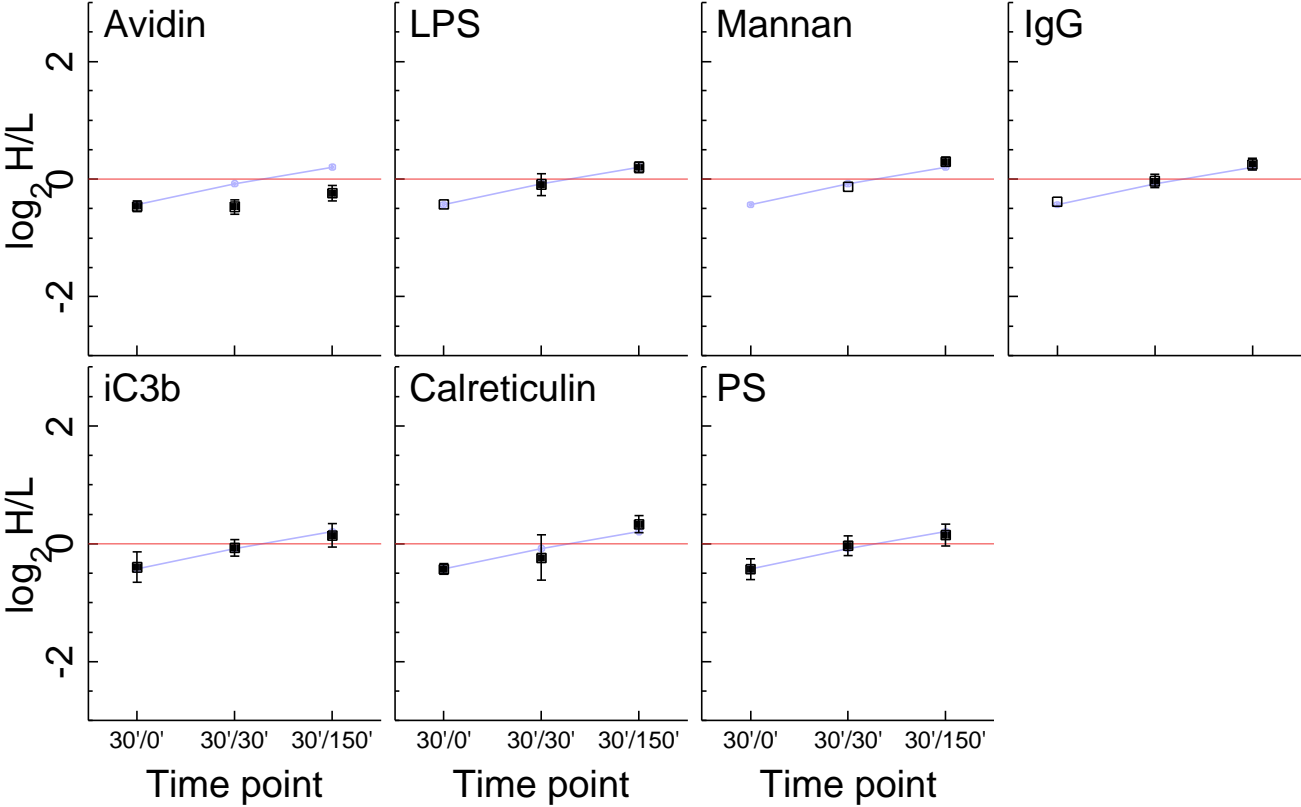

### snd1 (Q78PY7)

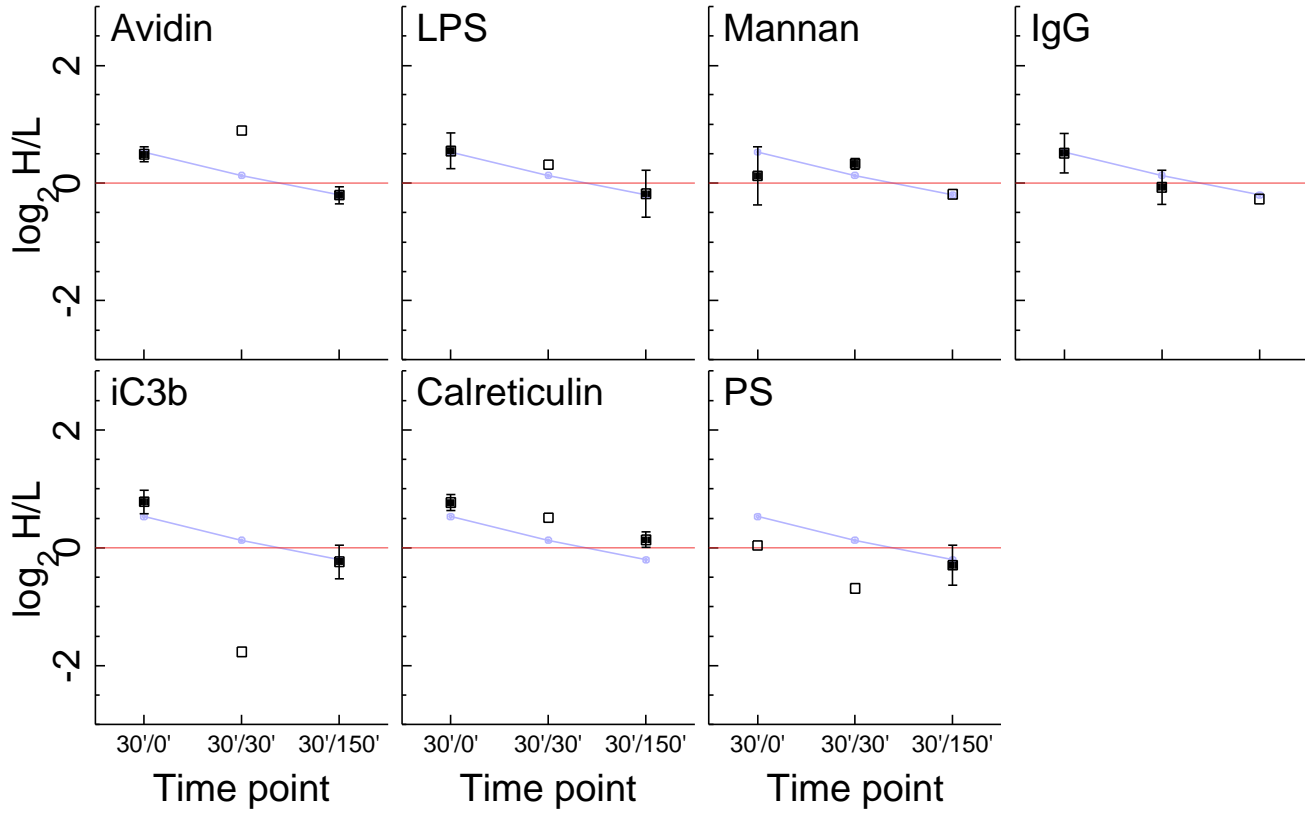



snf8 (Q9CZ28)

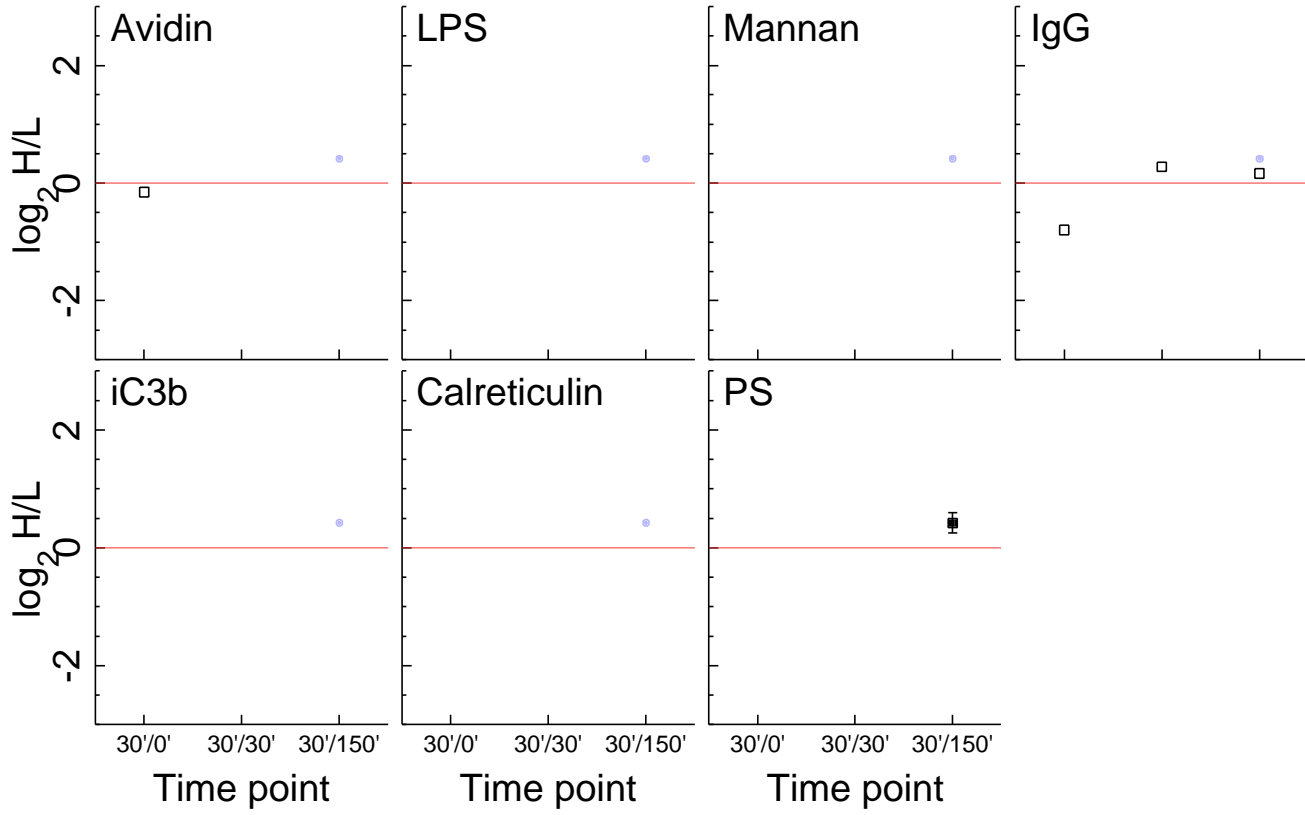

snrpa (Q62189)

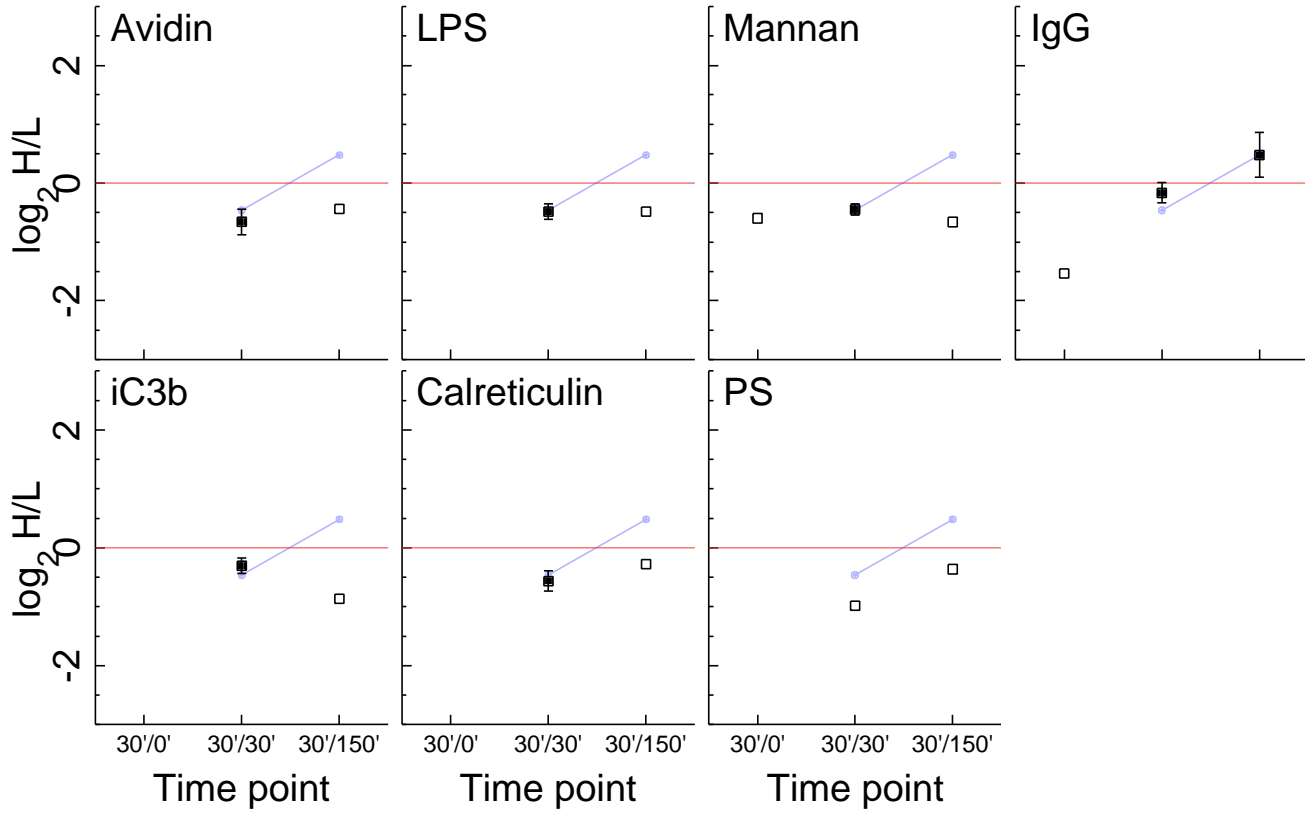

snrpc (Q62241)

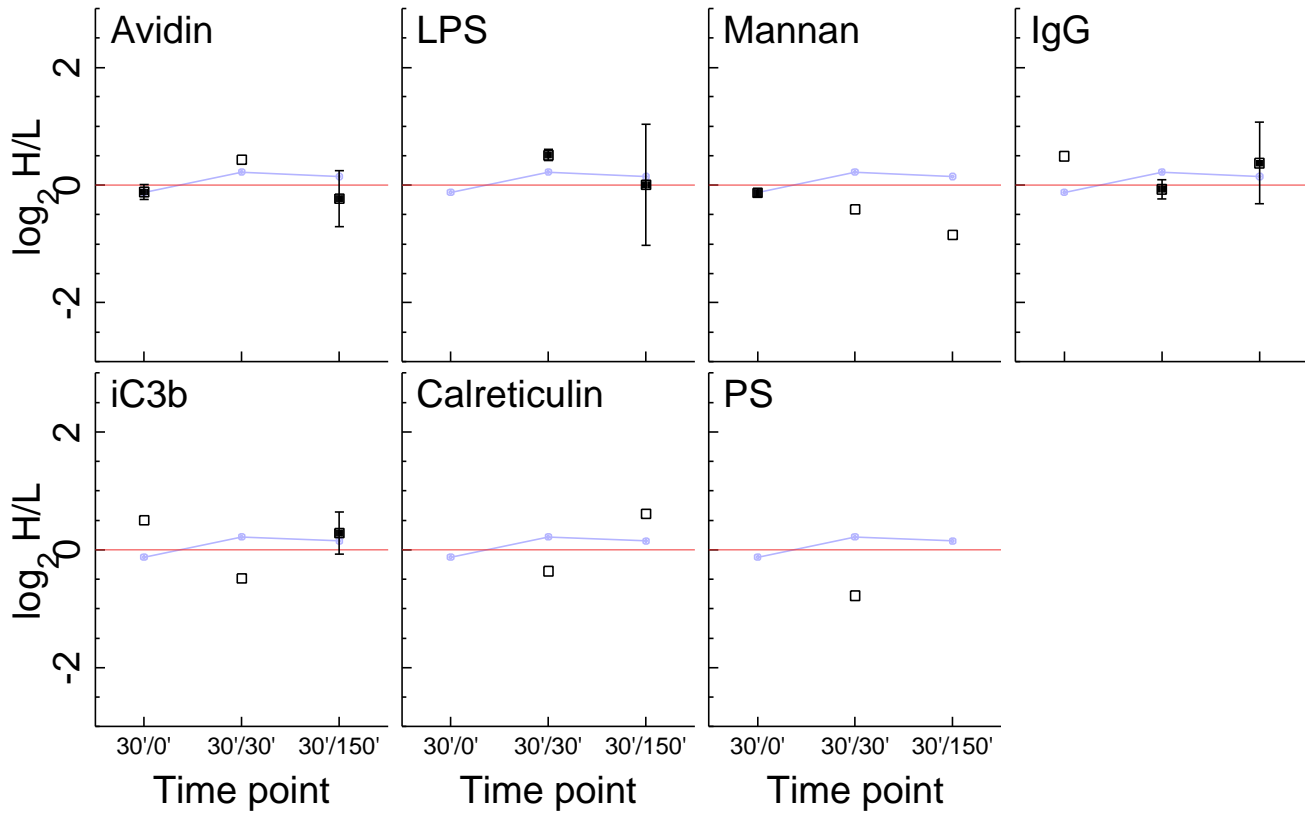

snrpd3 (P62320)

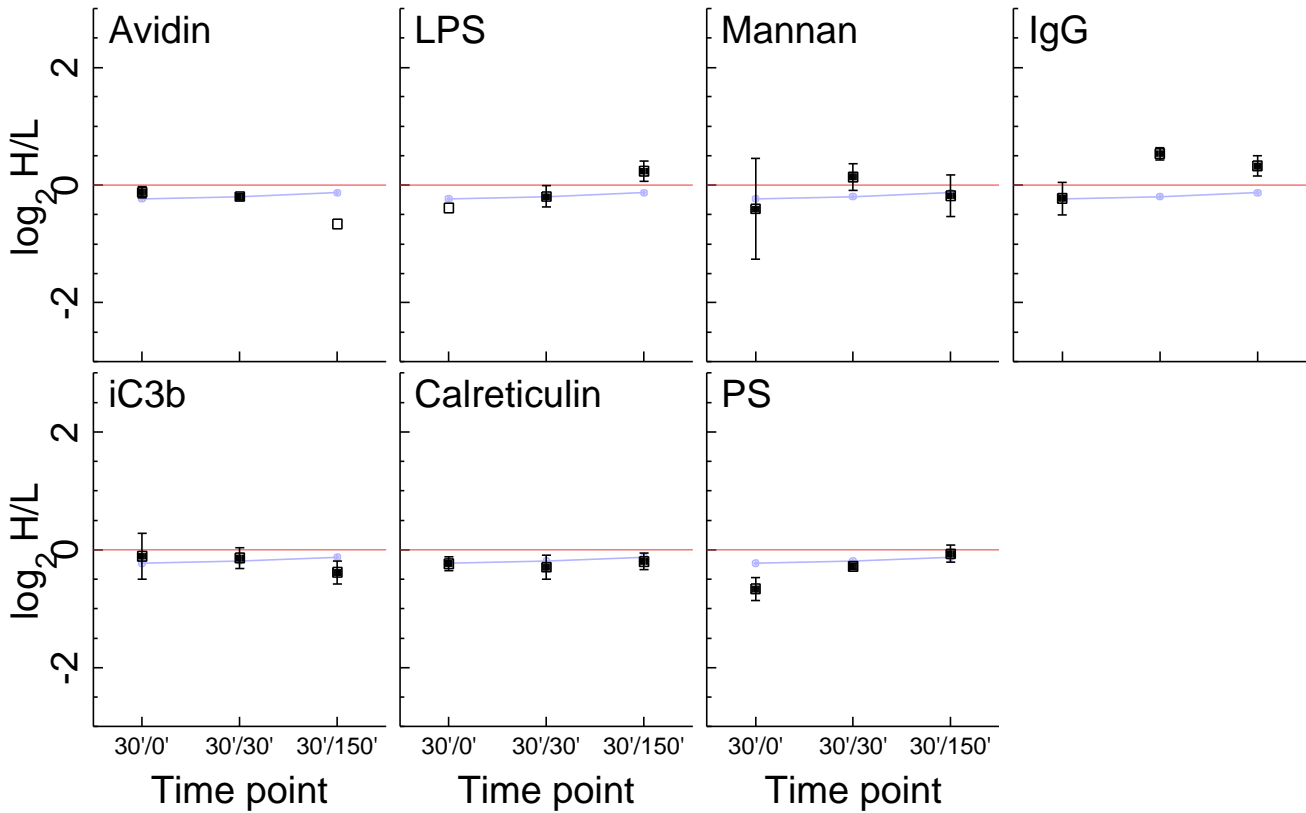

snrpn (P63163)

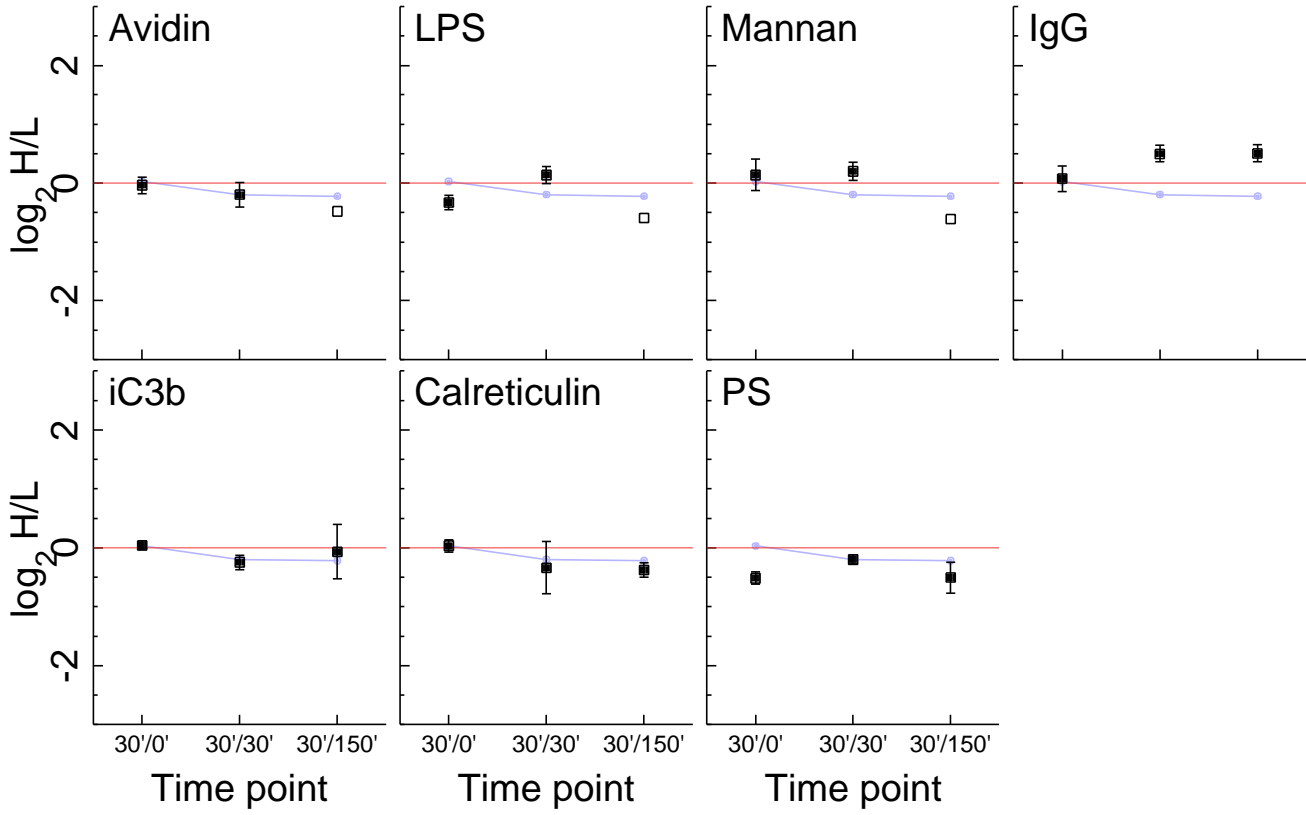

sntb2 (Q61235)

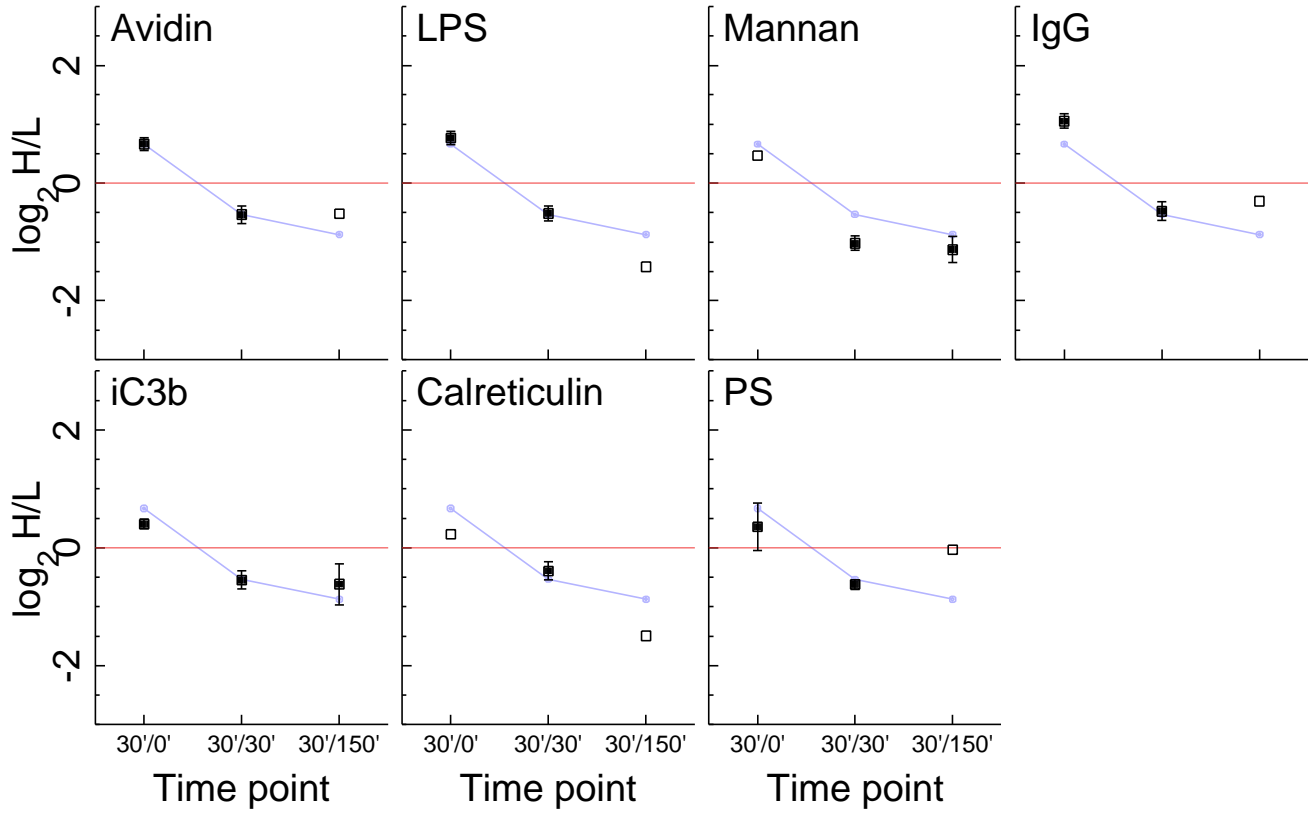

snx11 (Q91WL6)

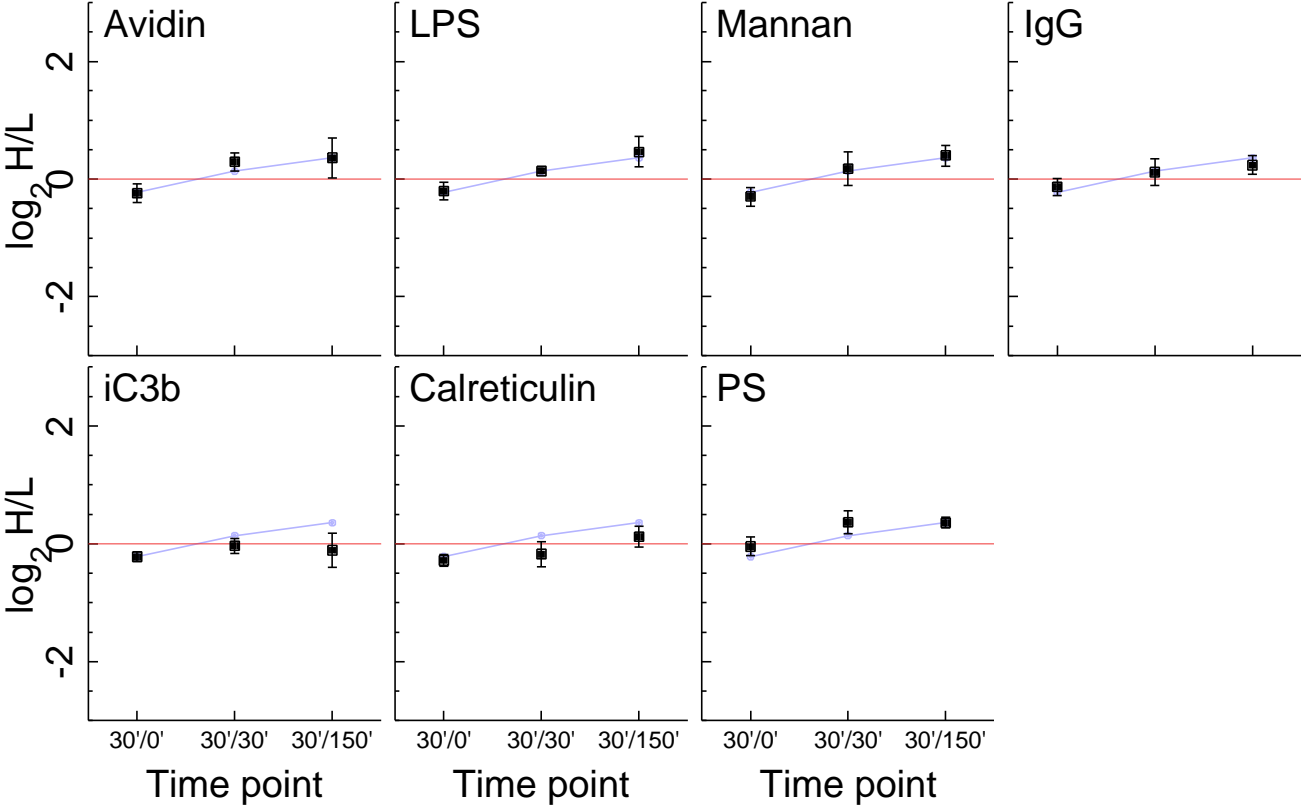

### snx12 (Q3V2H3)

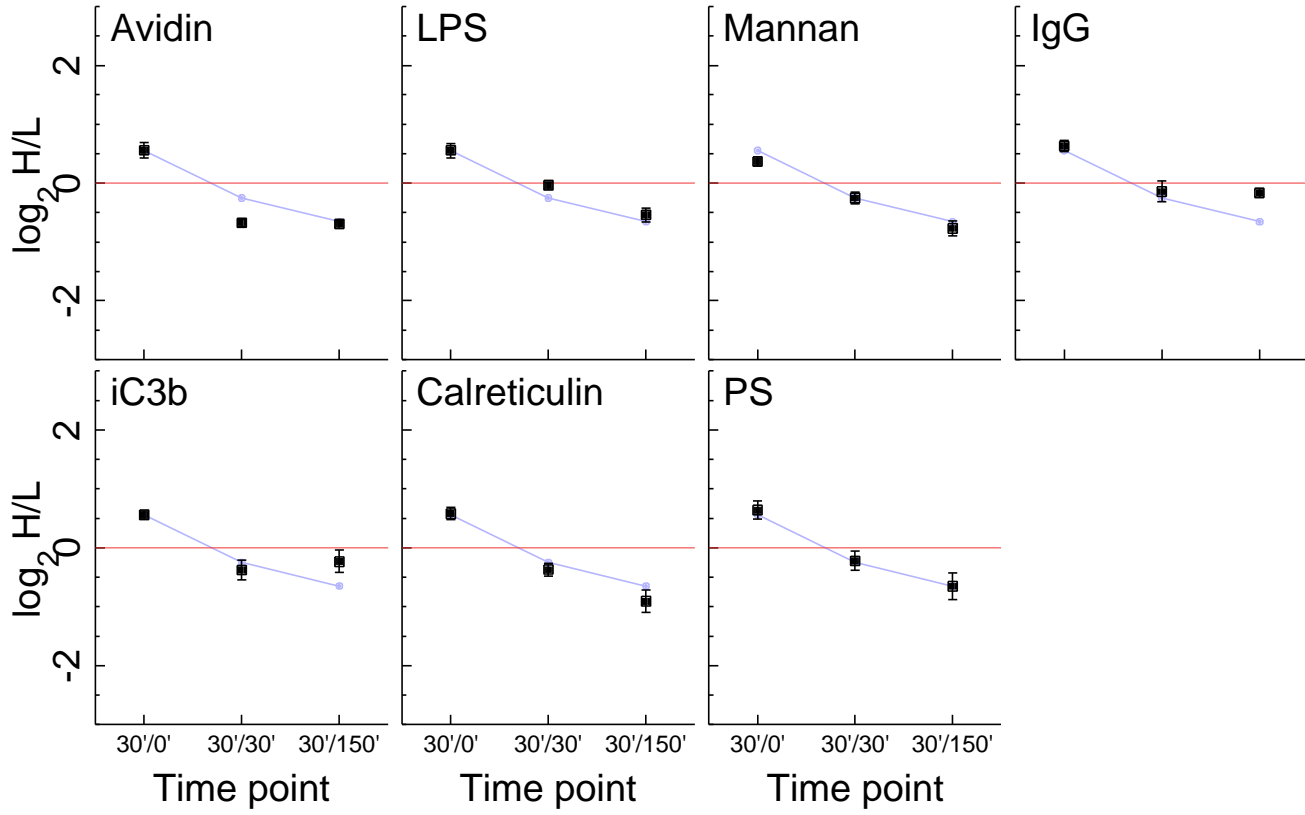



### snx16 (Q8C080)

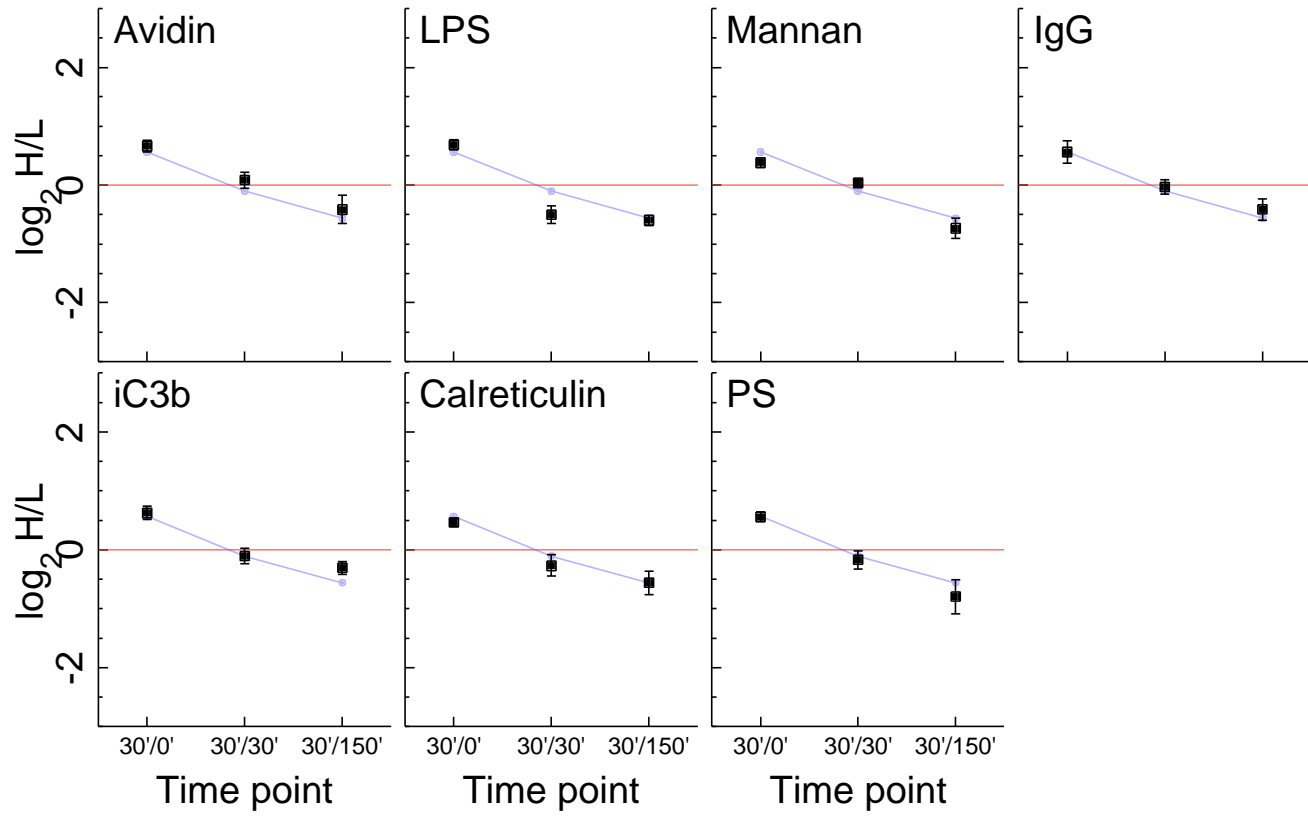

### snx17 (Q8BVL3)

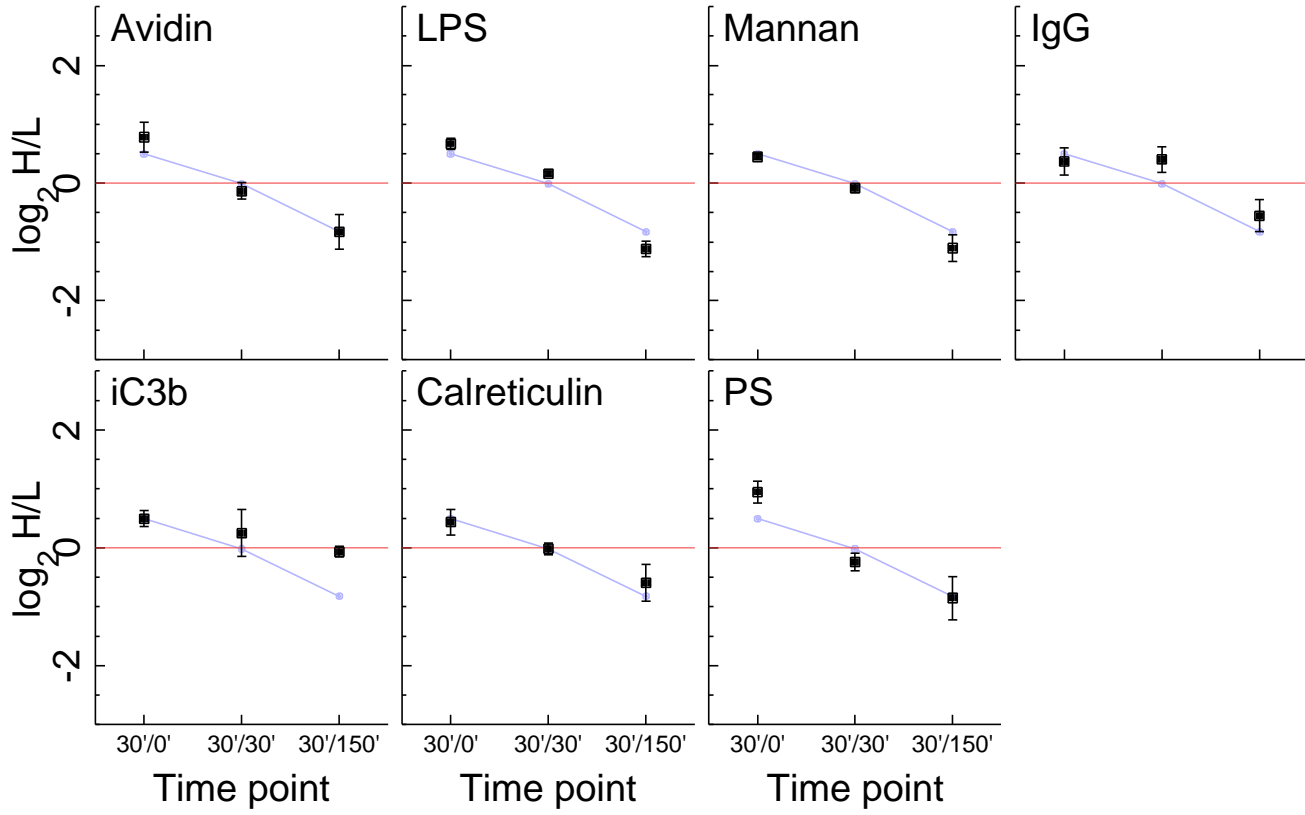

### snx1 (Q9WV80)

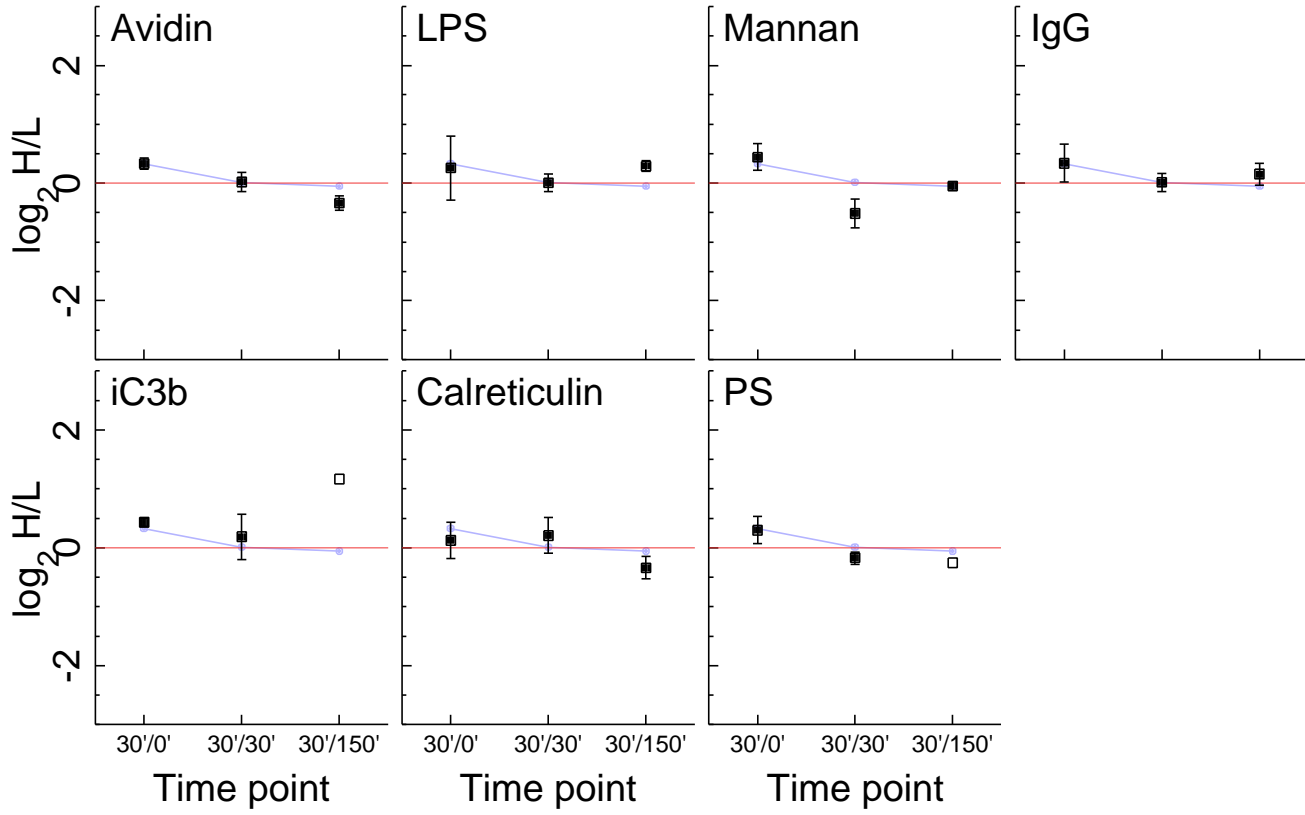

snx20 (Q9D2Y5)

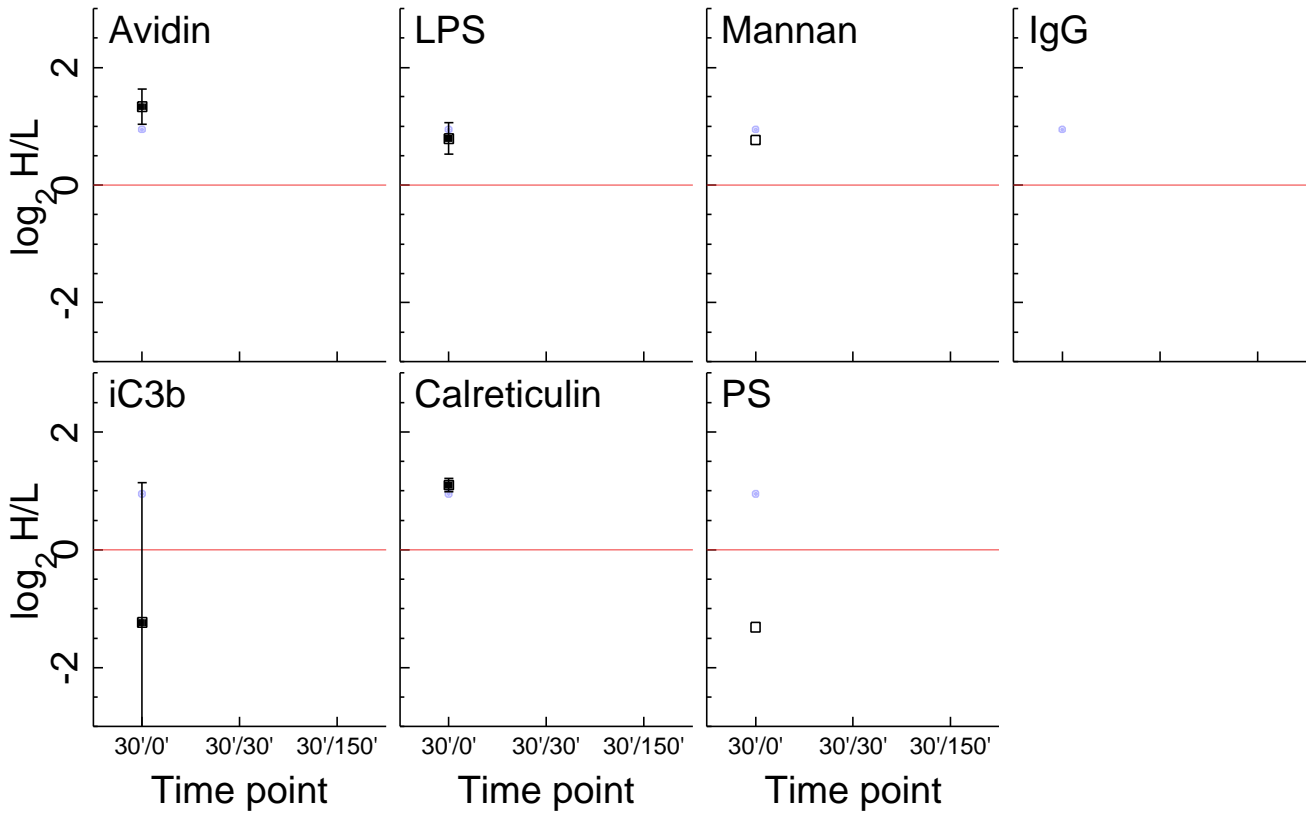

snx27 (Q3UHD6)

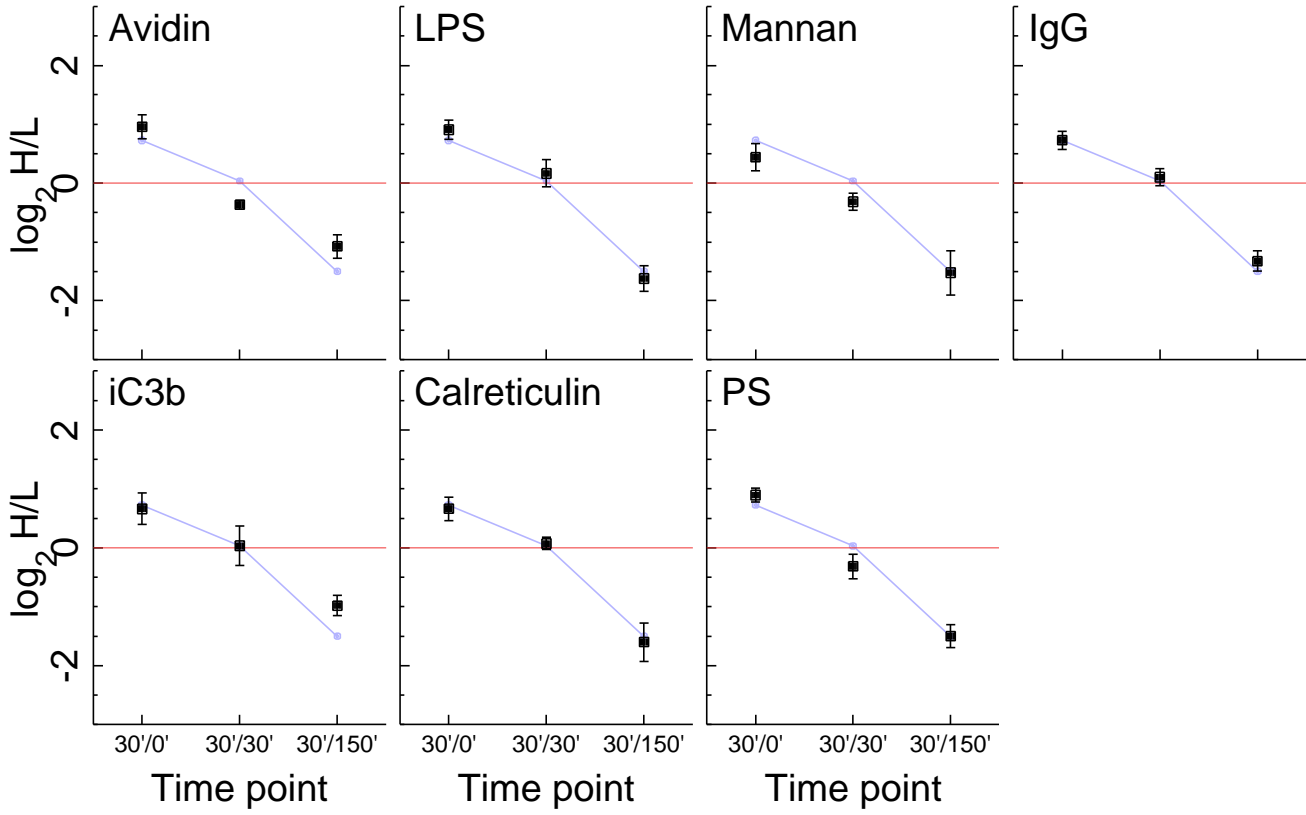

snx29 (Q9D3S3)

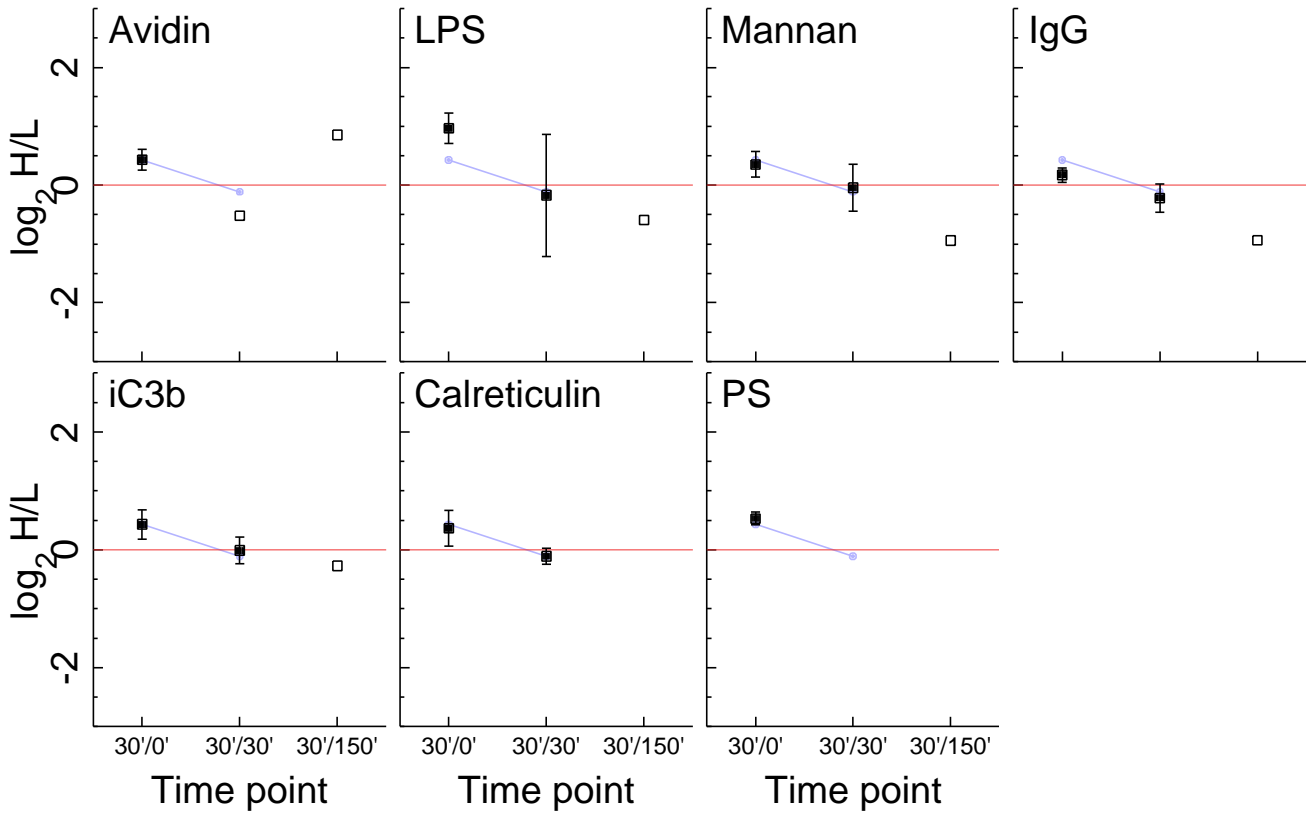

### snx2 (Q9CWK8)

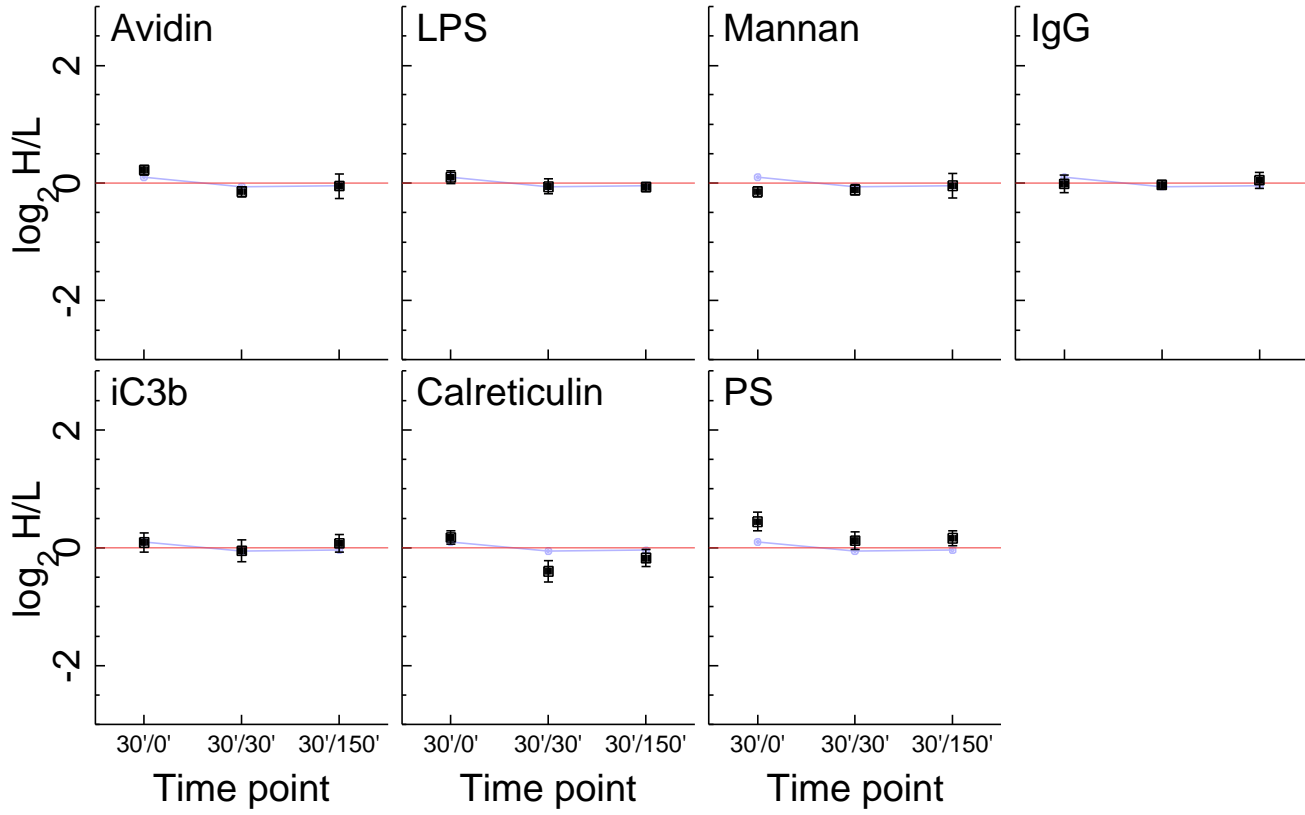

### snx30 (Q8CE50)

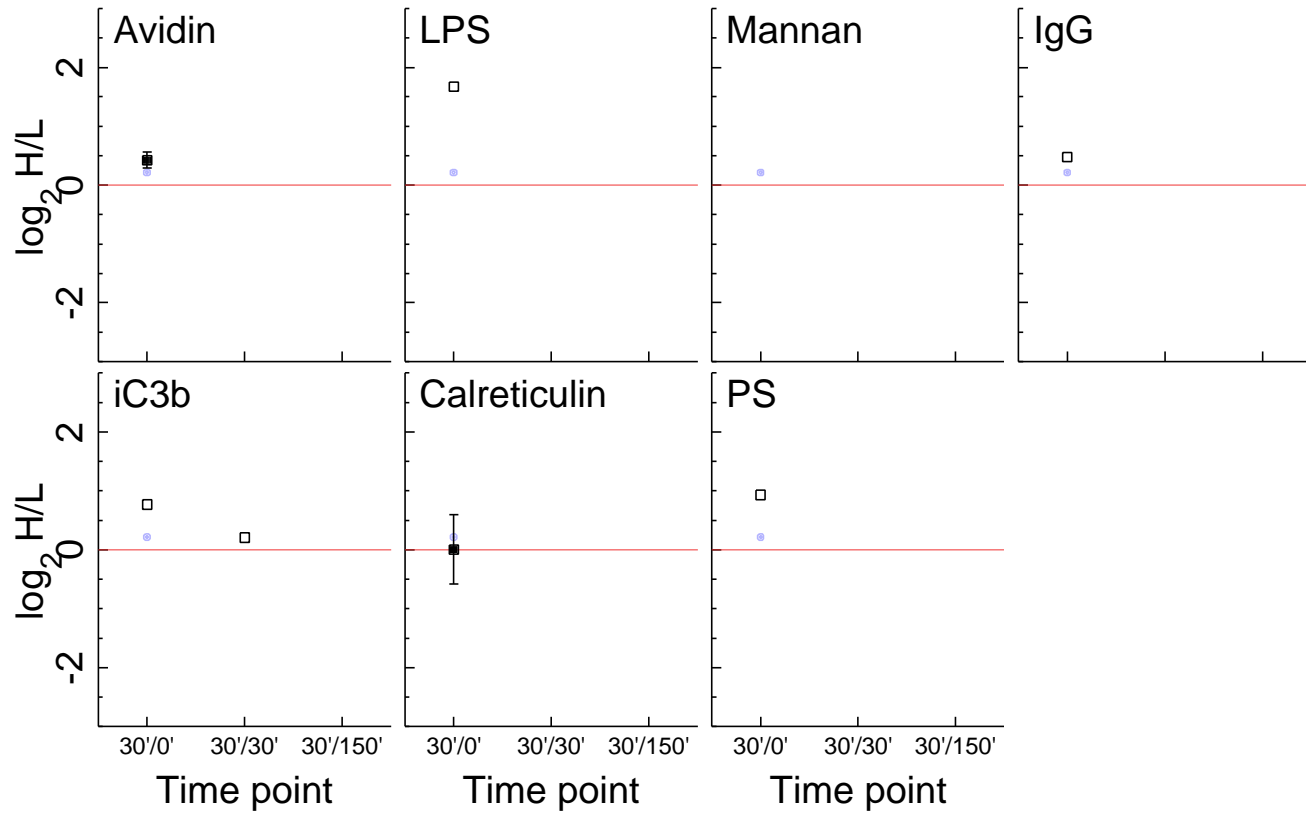



### snx3 (Q78ZM0)

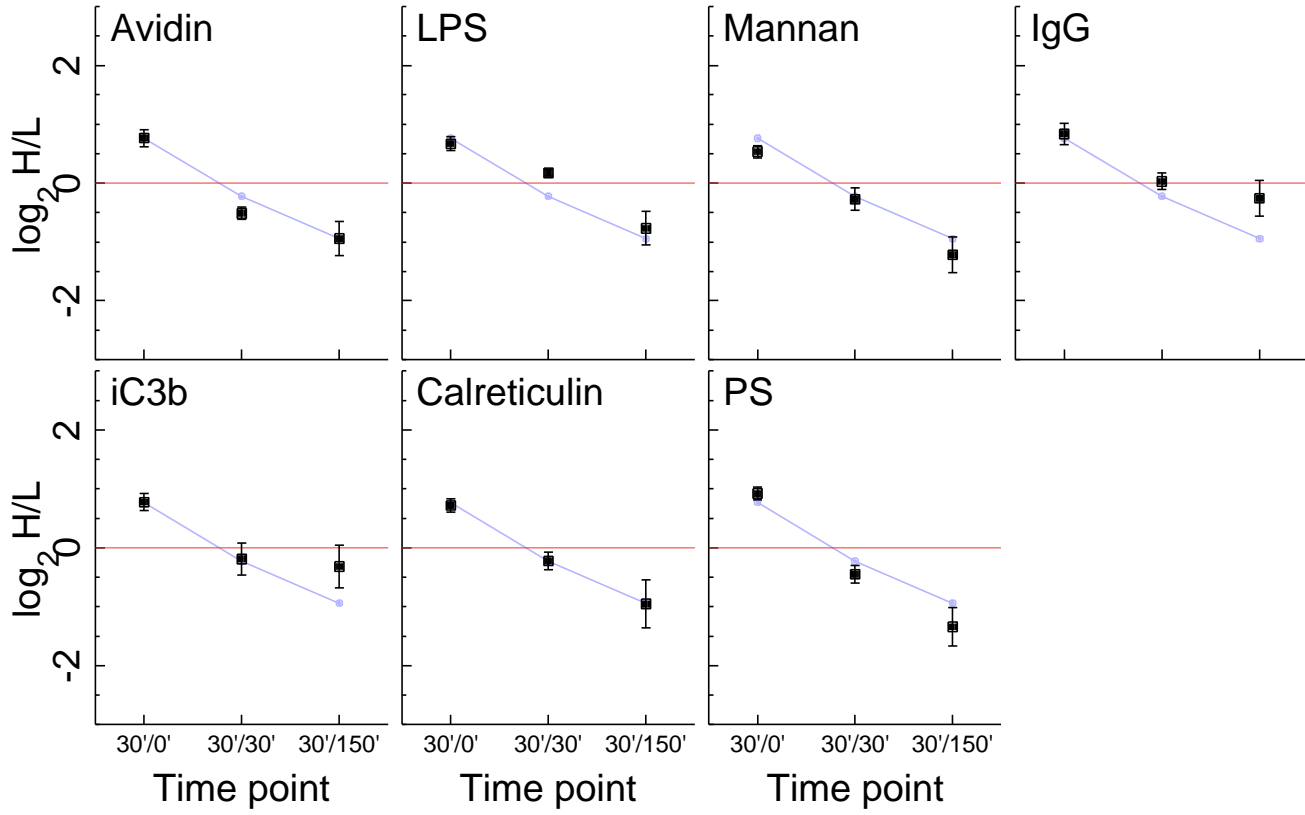

### snx4 (Q91YJ2)

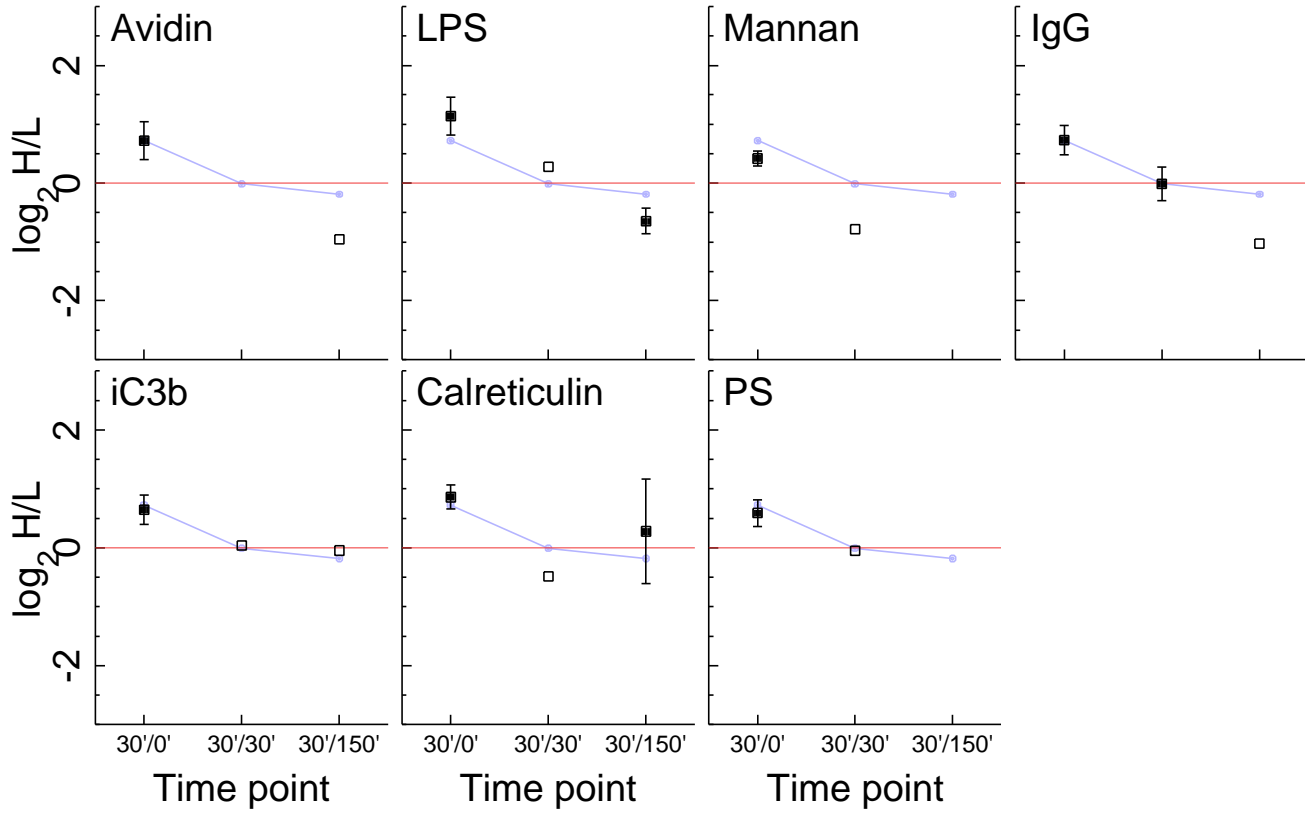

snx5 (Q9D8U8)

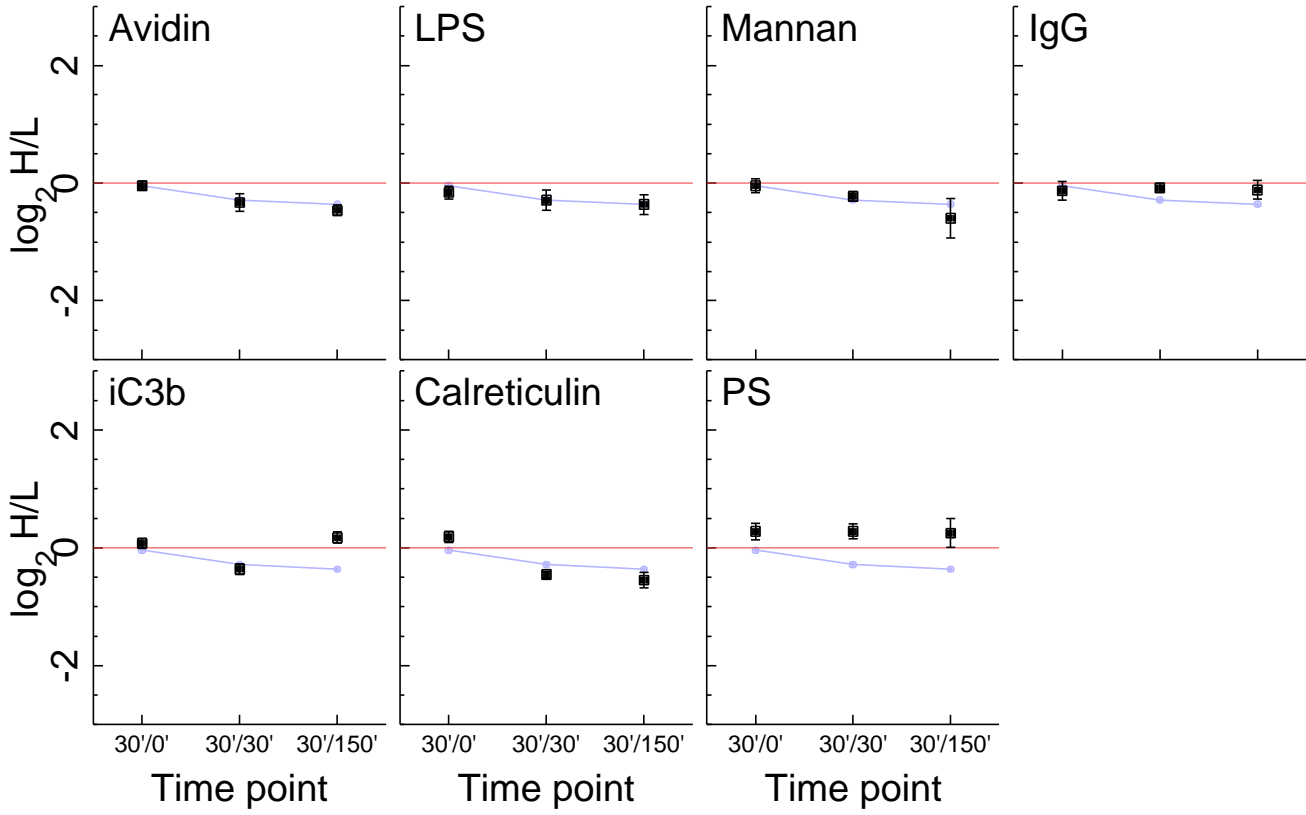

snx6 (Q6P8X1)

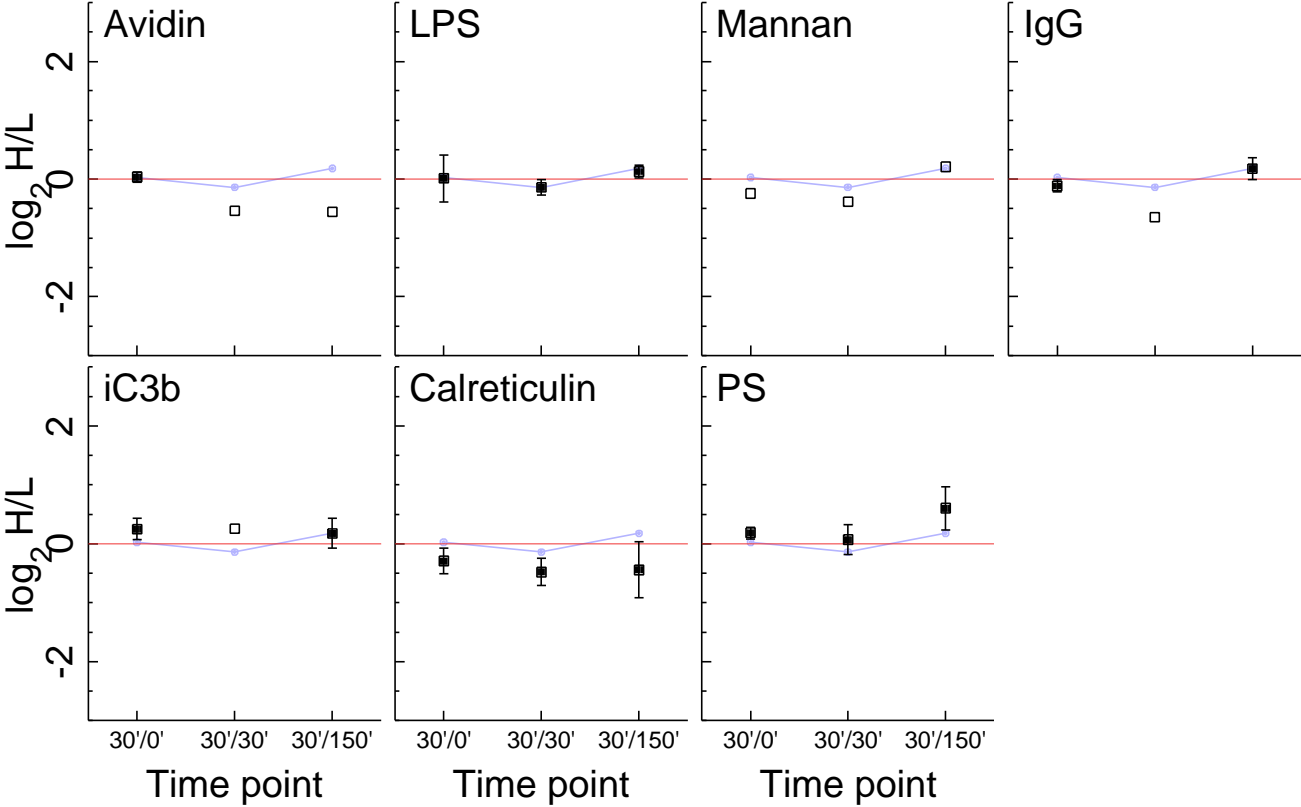

### snx8 (Q8CFD4)

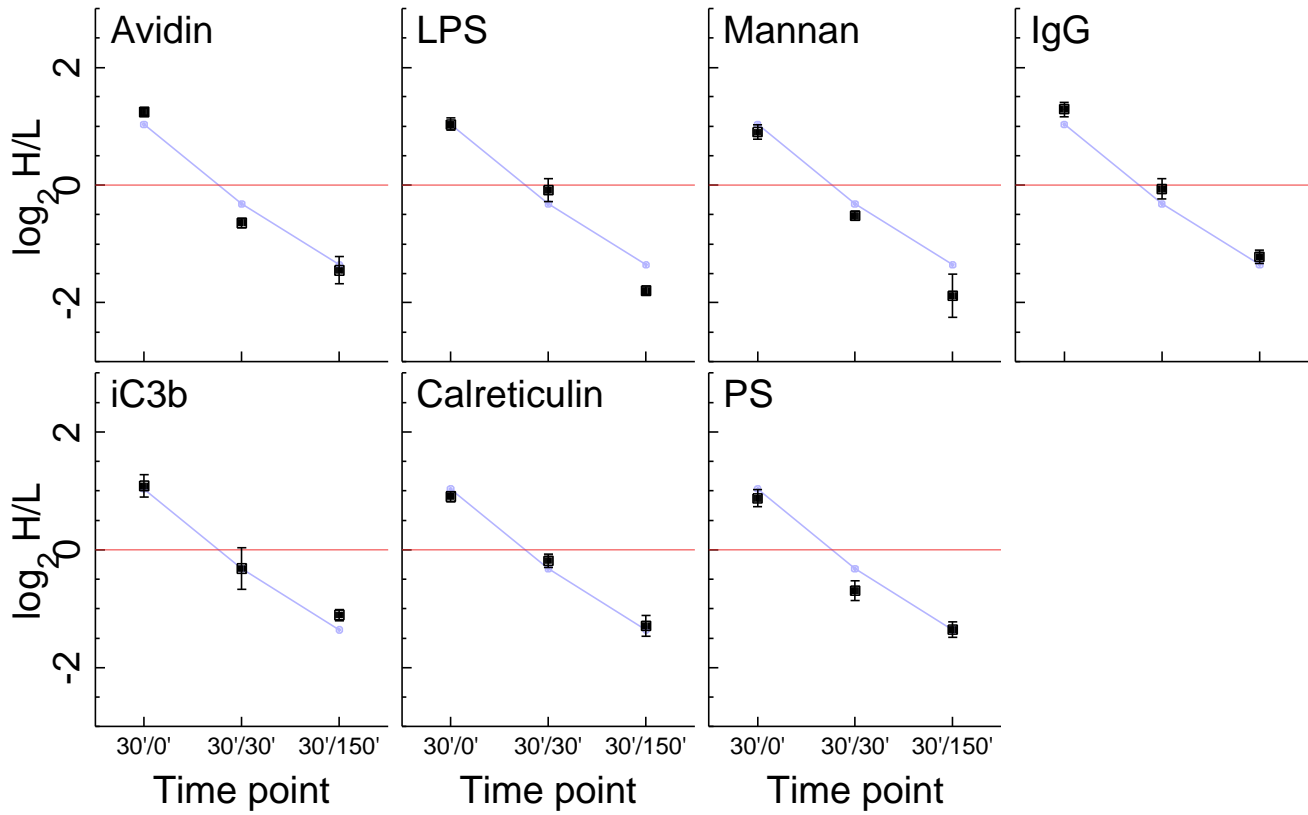

sod1 (P08228)

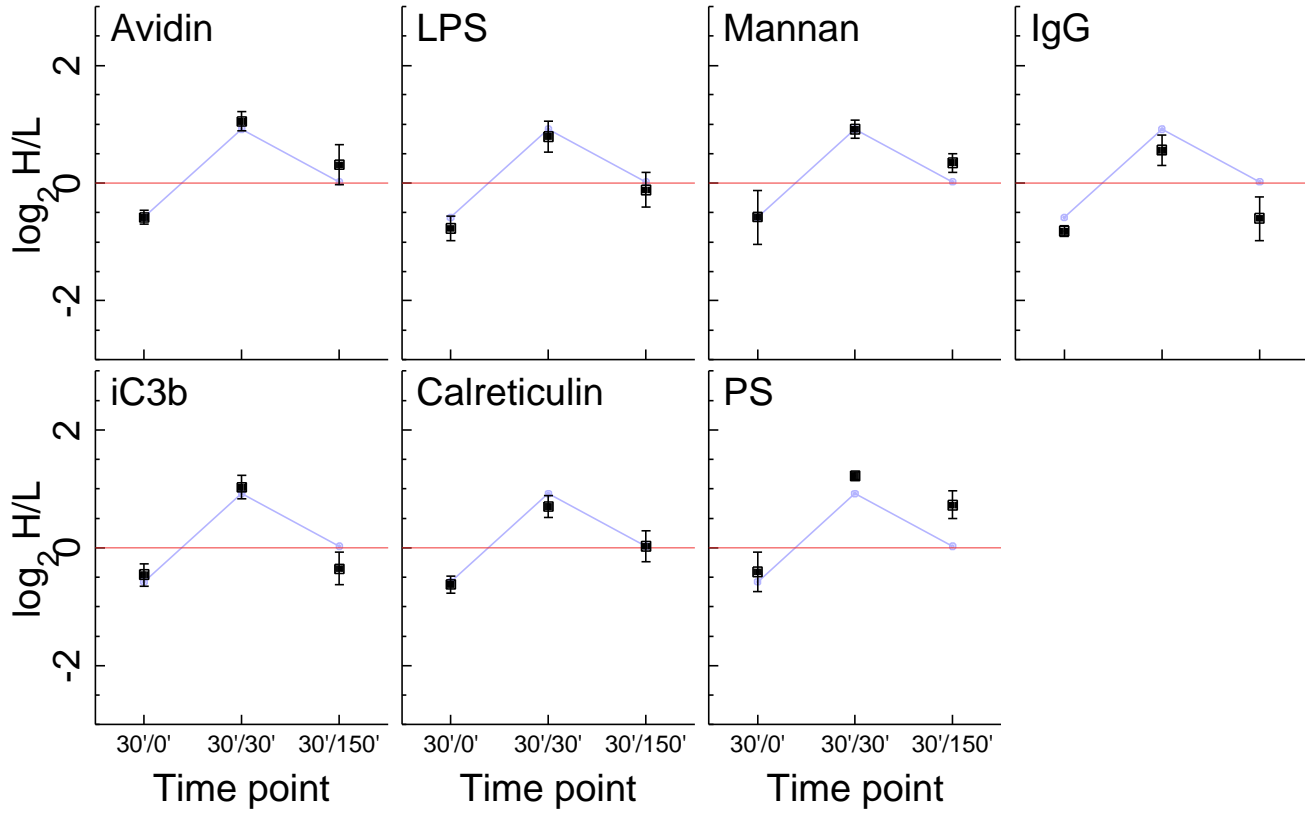

sod2 (P09671)

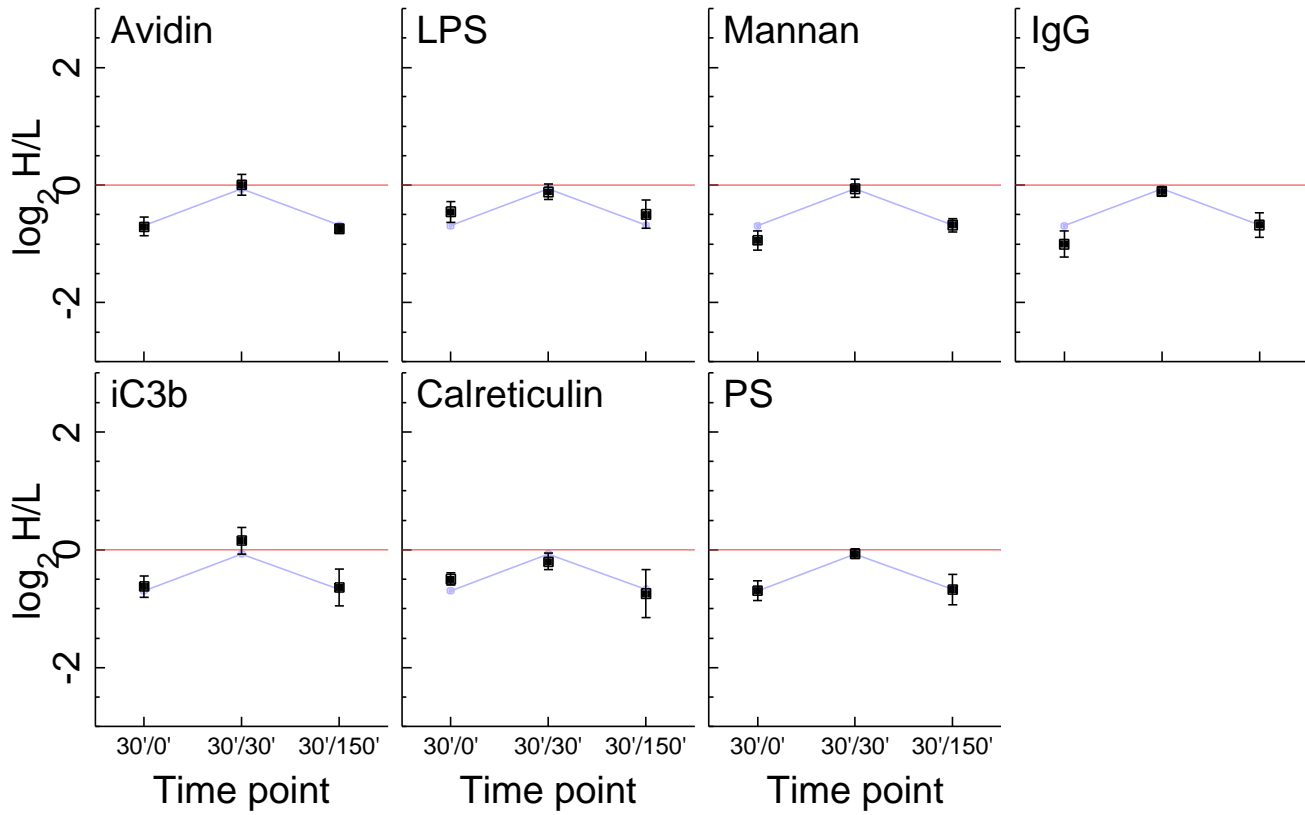

spag7 (Q7TNE3)

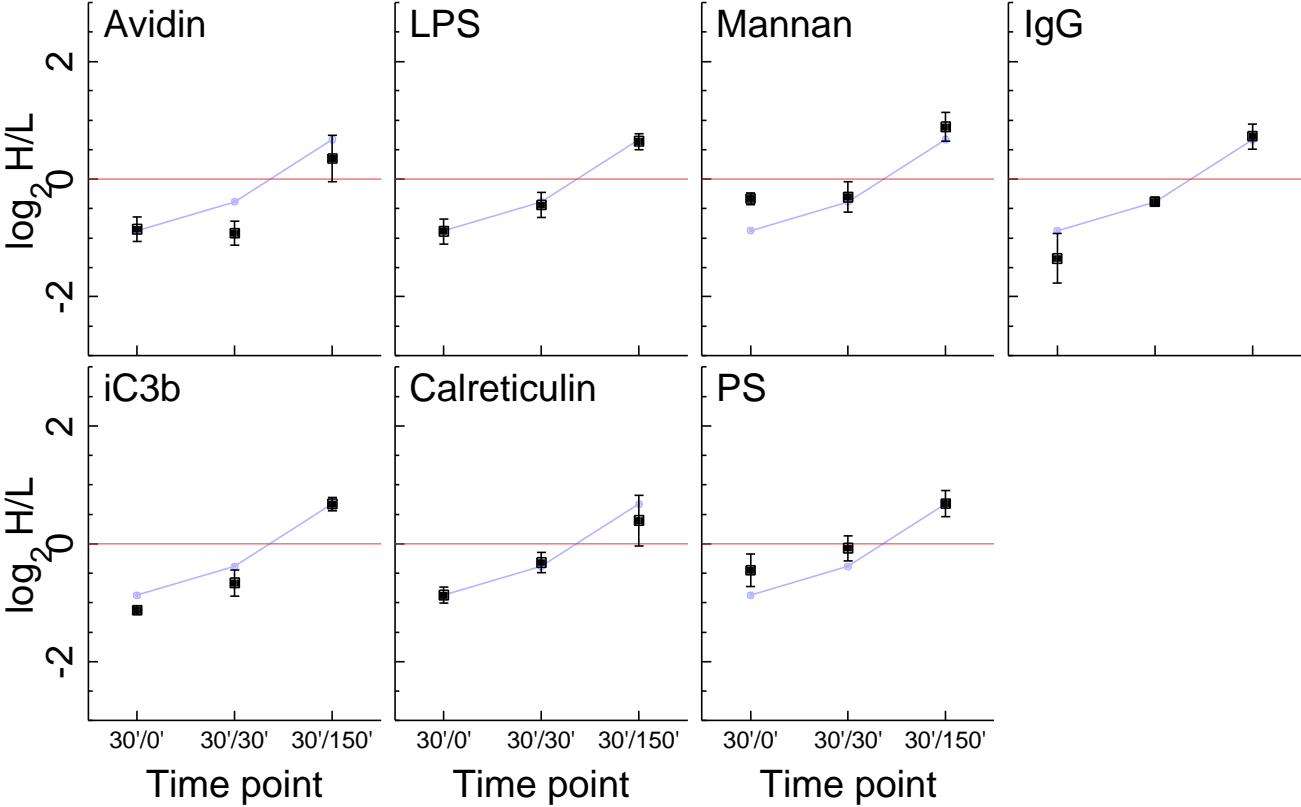



spcs2 (Q9CYN2)

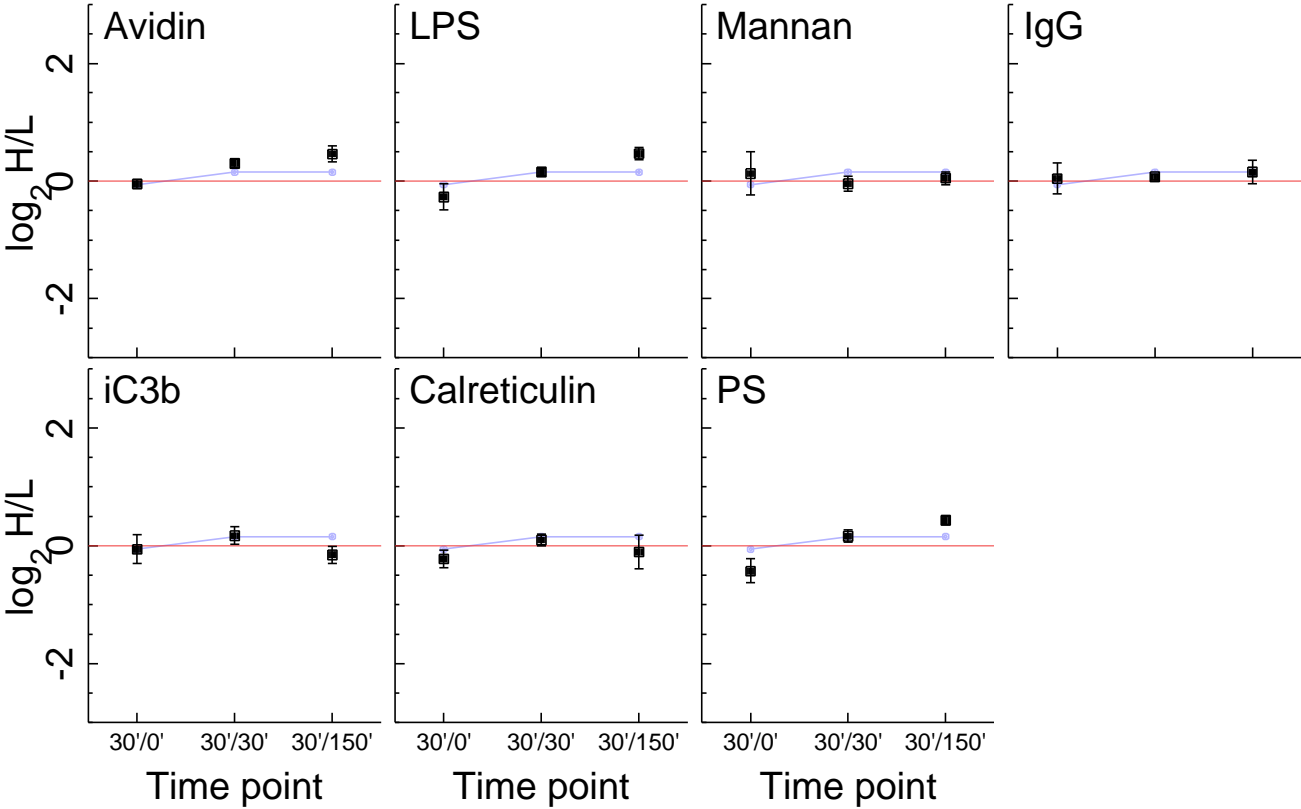

spcs3 (Q6ZWQ7)

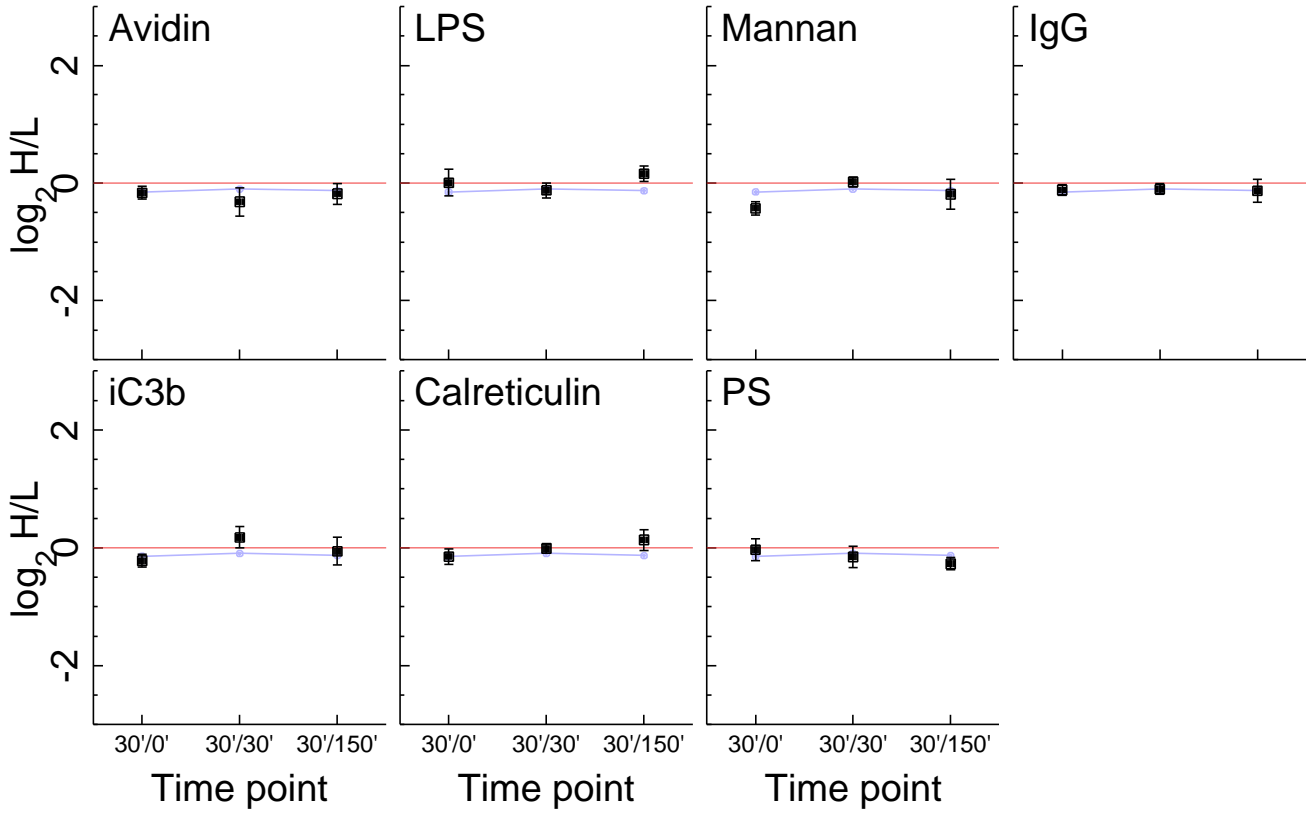

spe39 (Q8BGQ1)

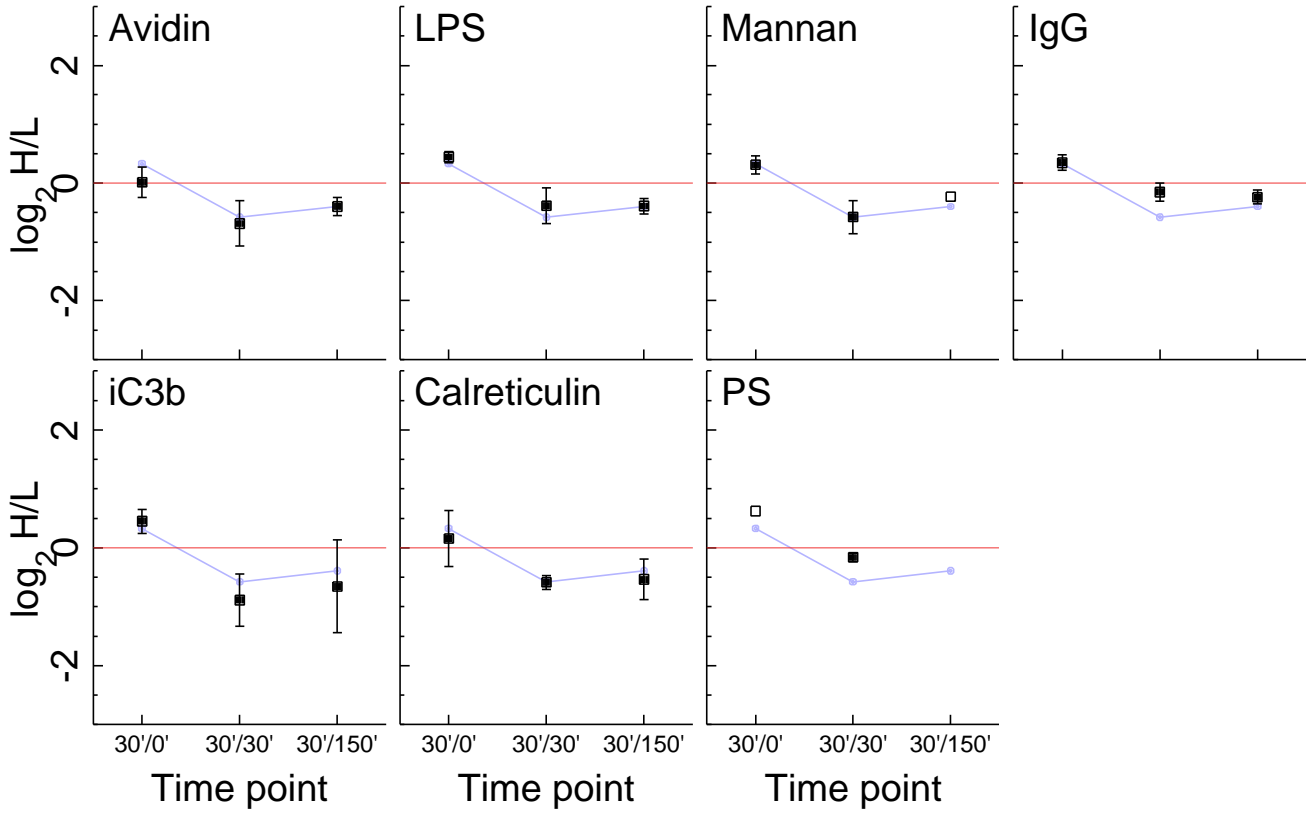

specc1 (Q5SXY1)

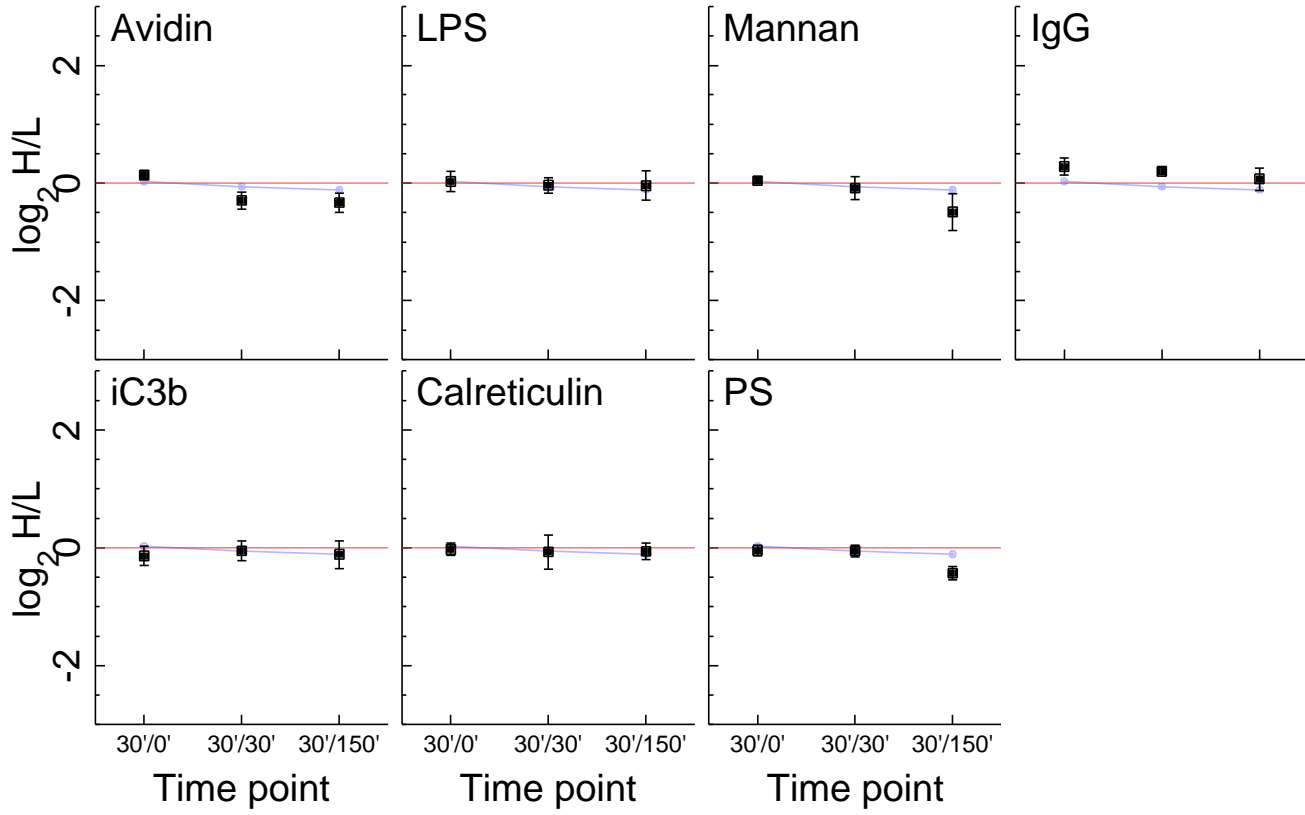

spg20 (Q8R1X6)

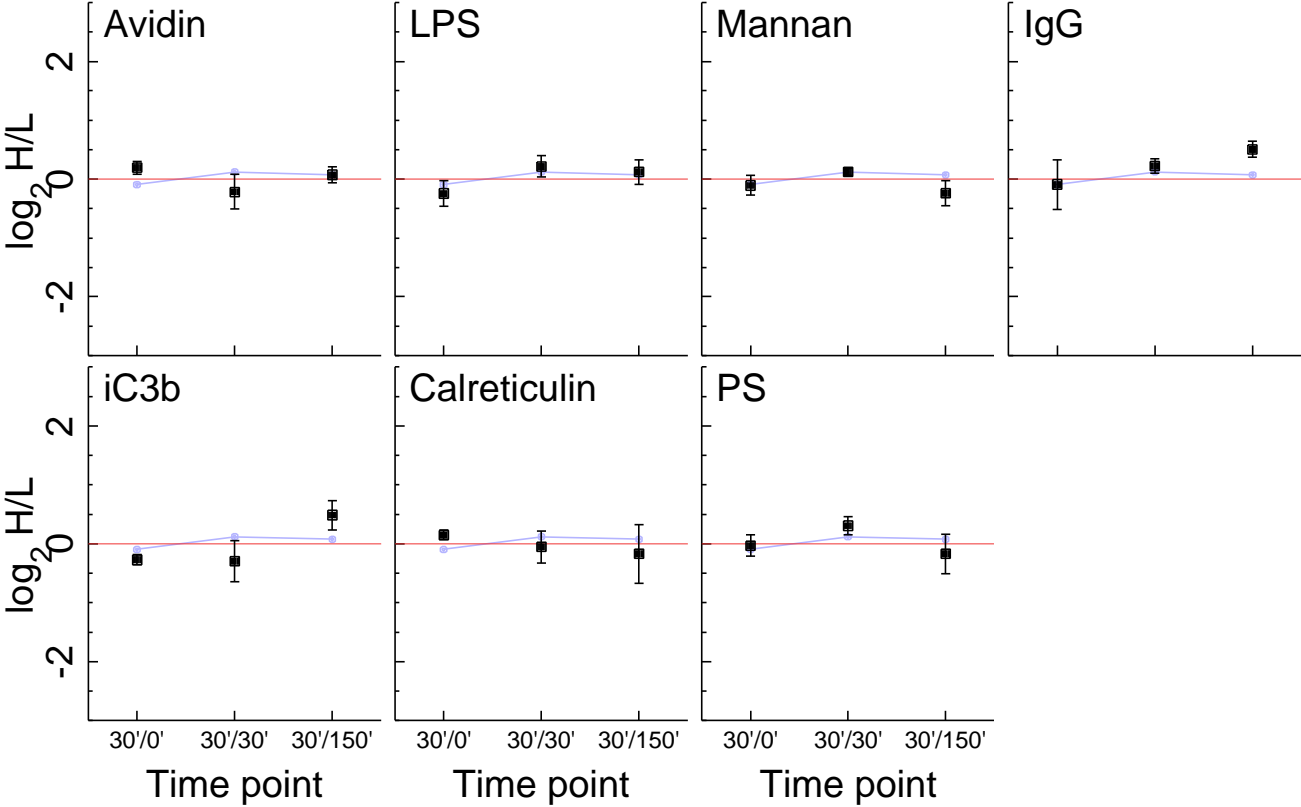

spg21 (Q9CQC8)

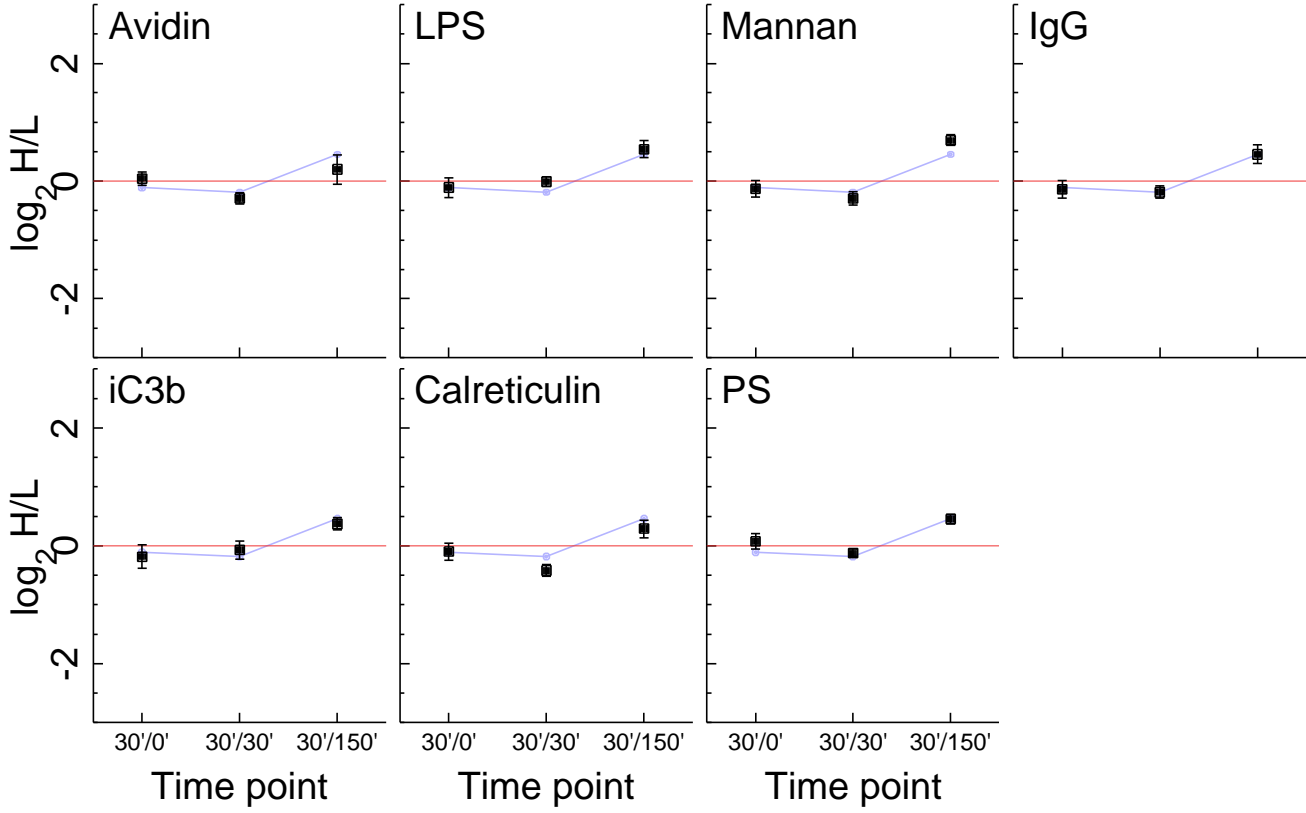

sphk2 (Q9JIA7)

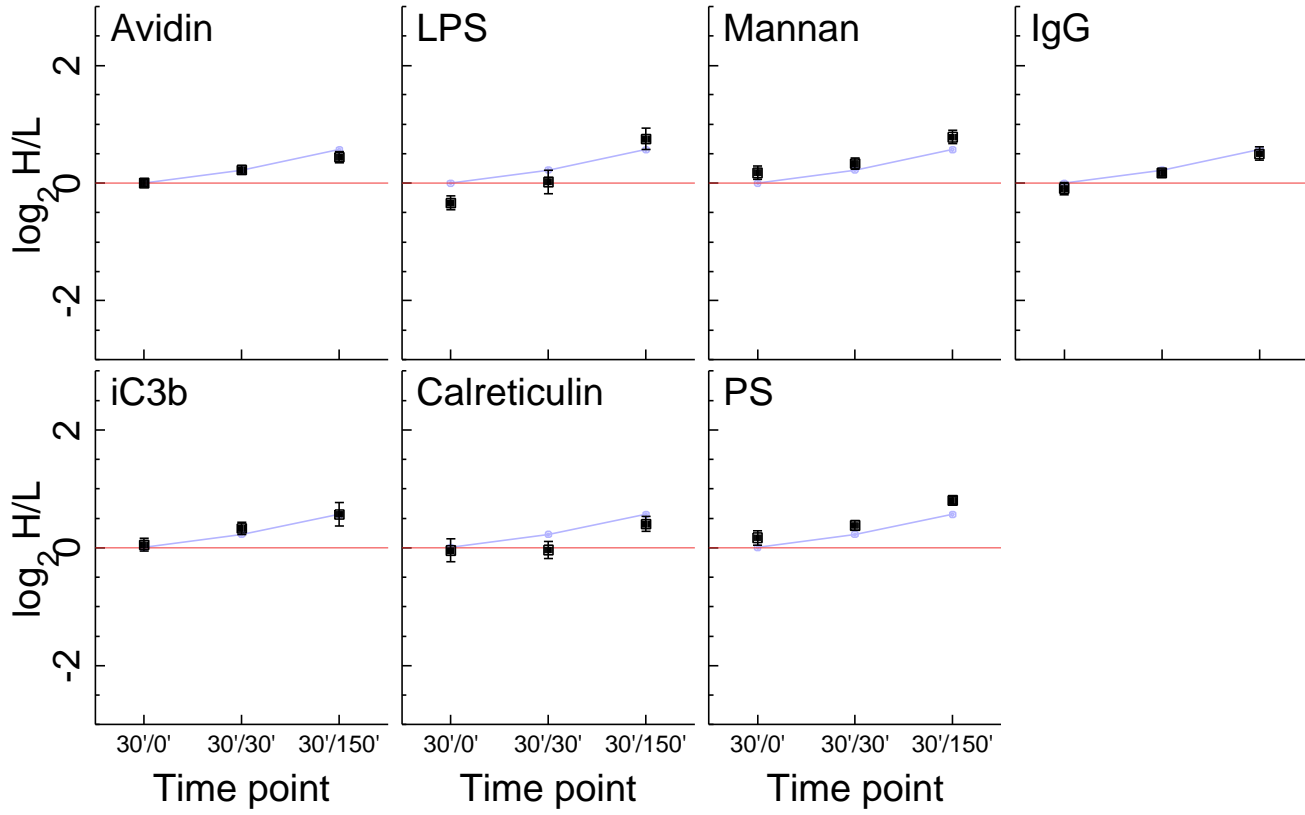

sfn (P15702)

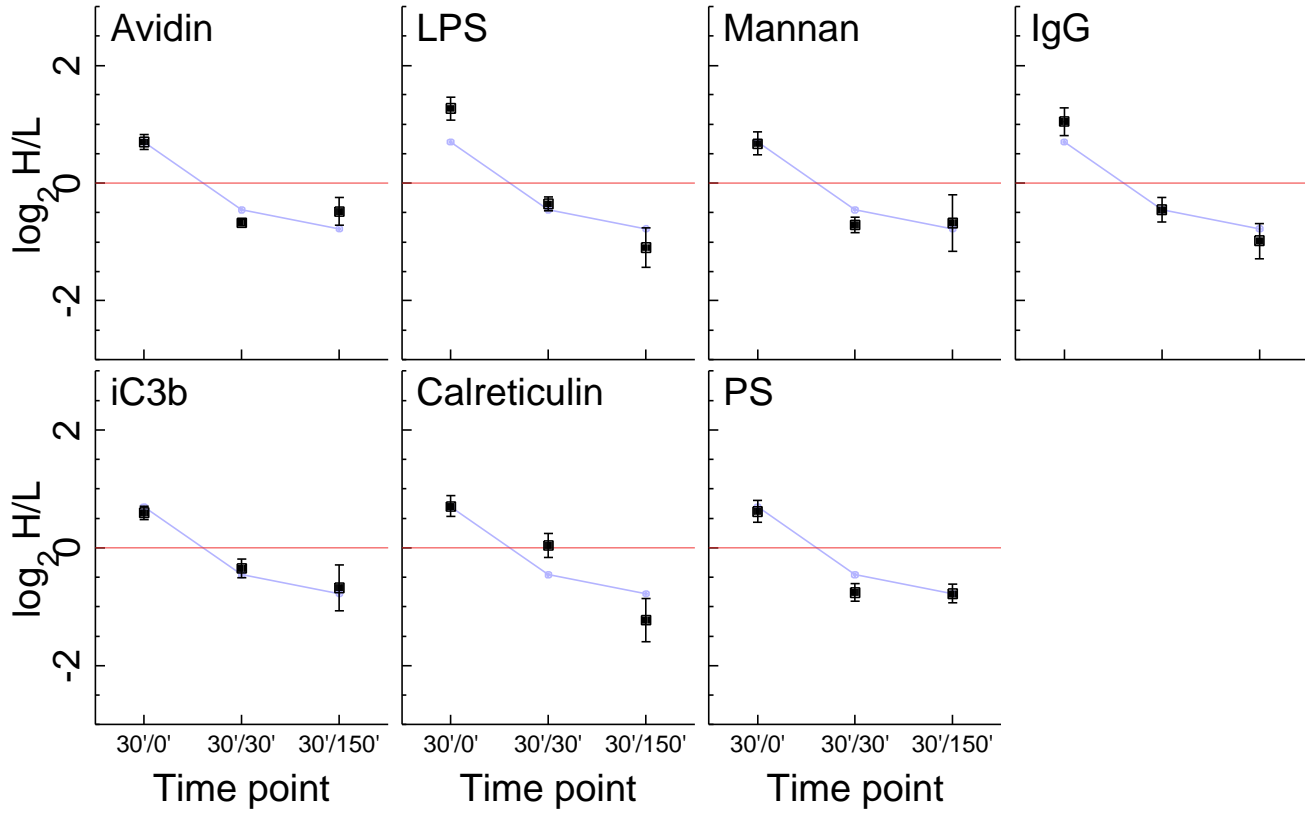



spns1 (Q8R0G7)

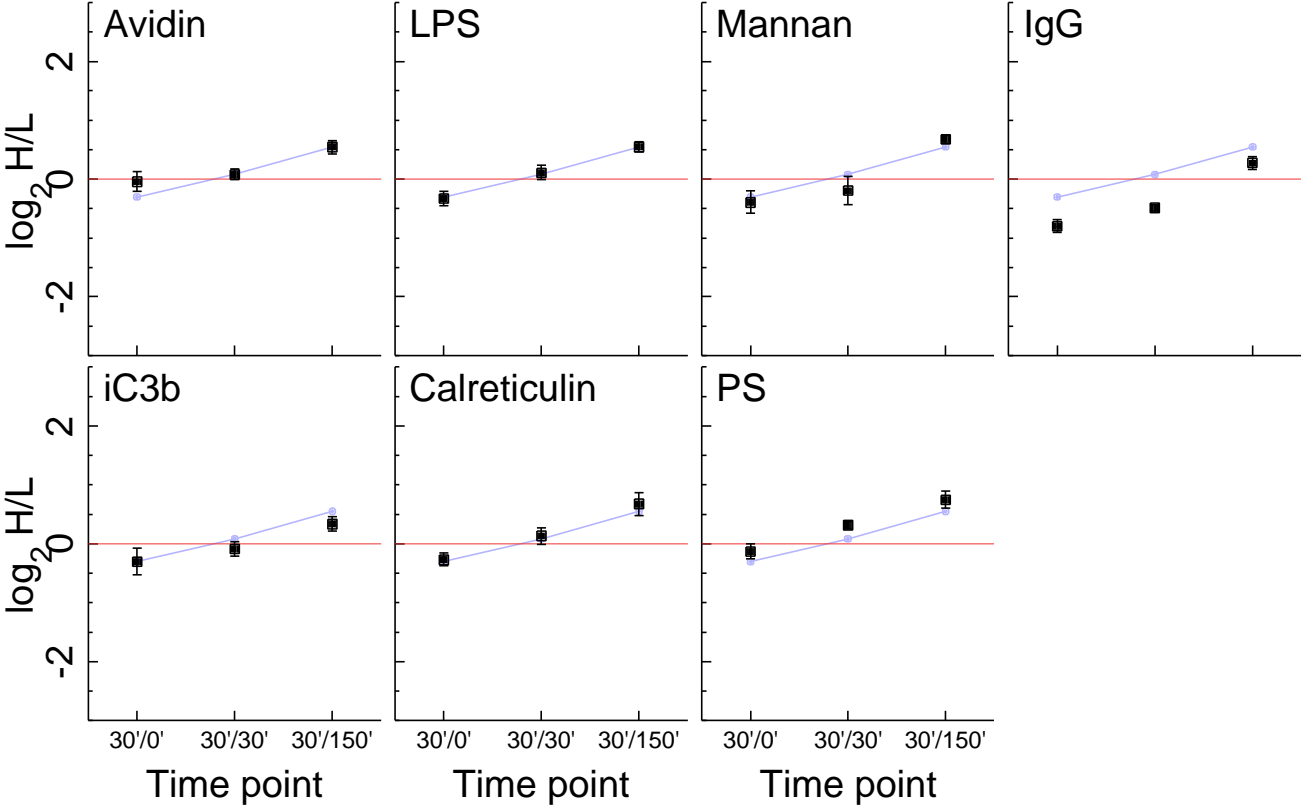

sppl2a (Q9JJF9)

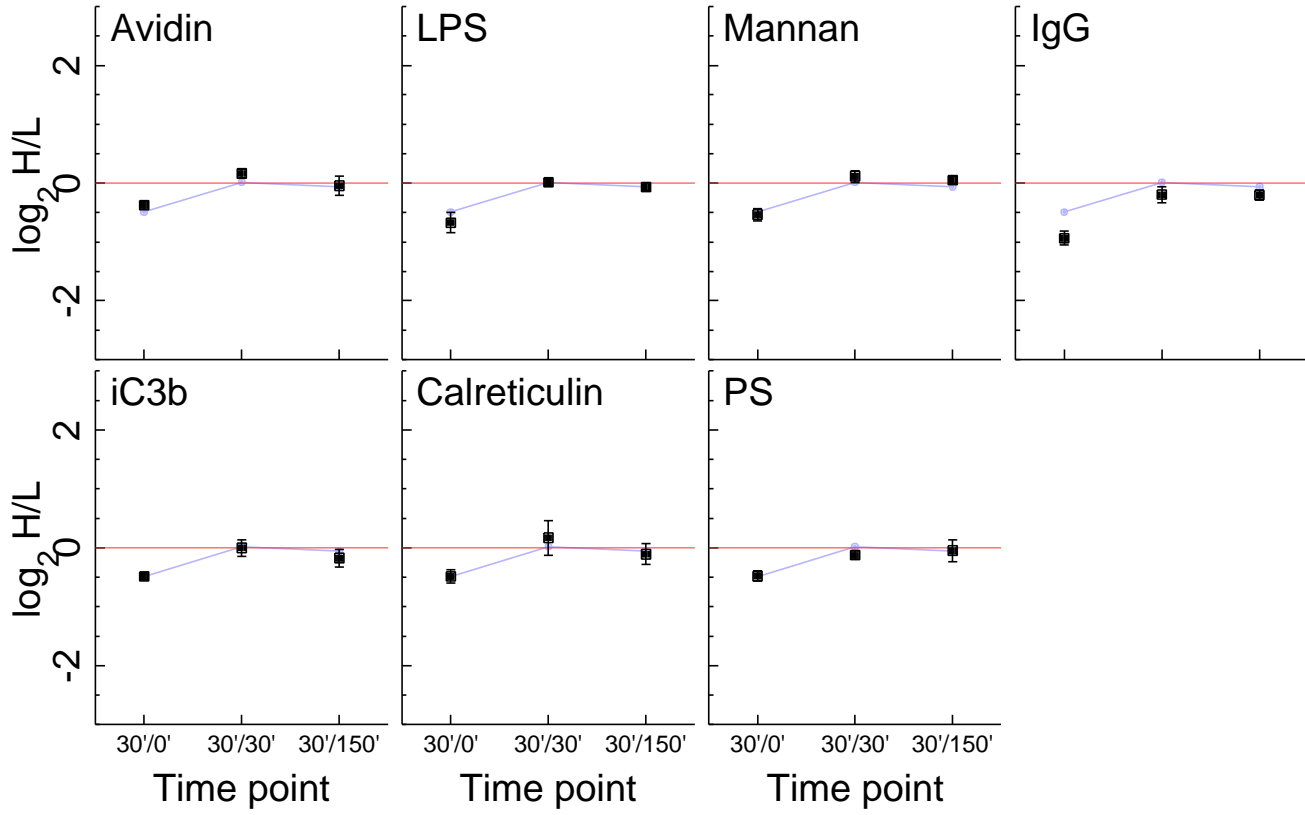

### spryd7 (Q3TFQ1)

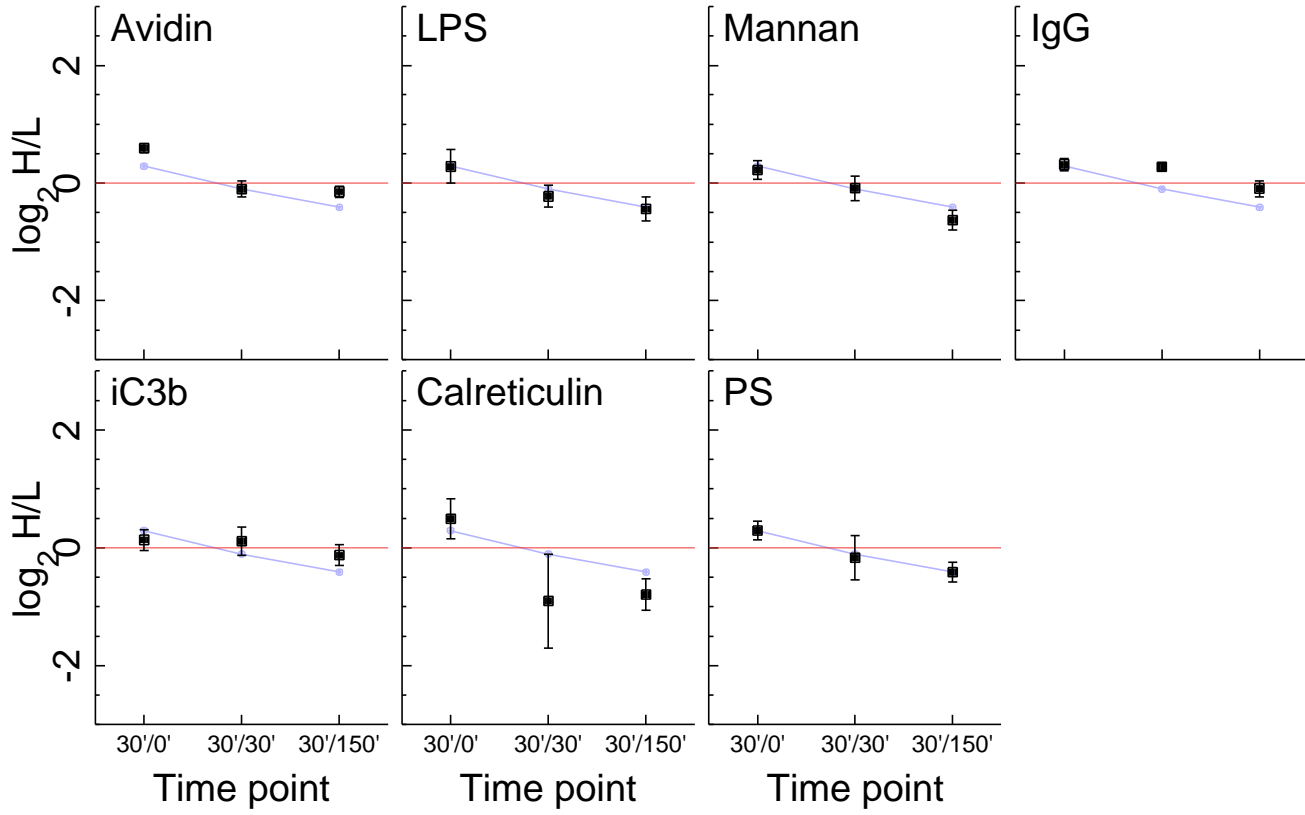

sptbn1 (Q62261)

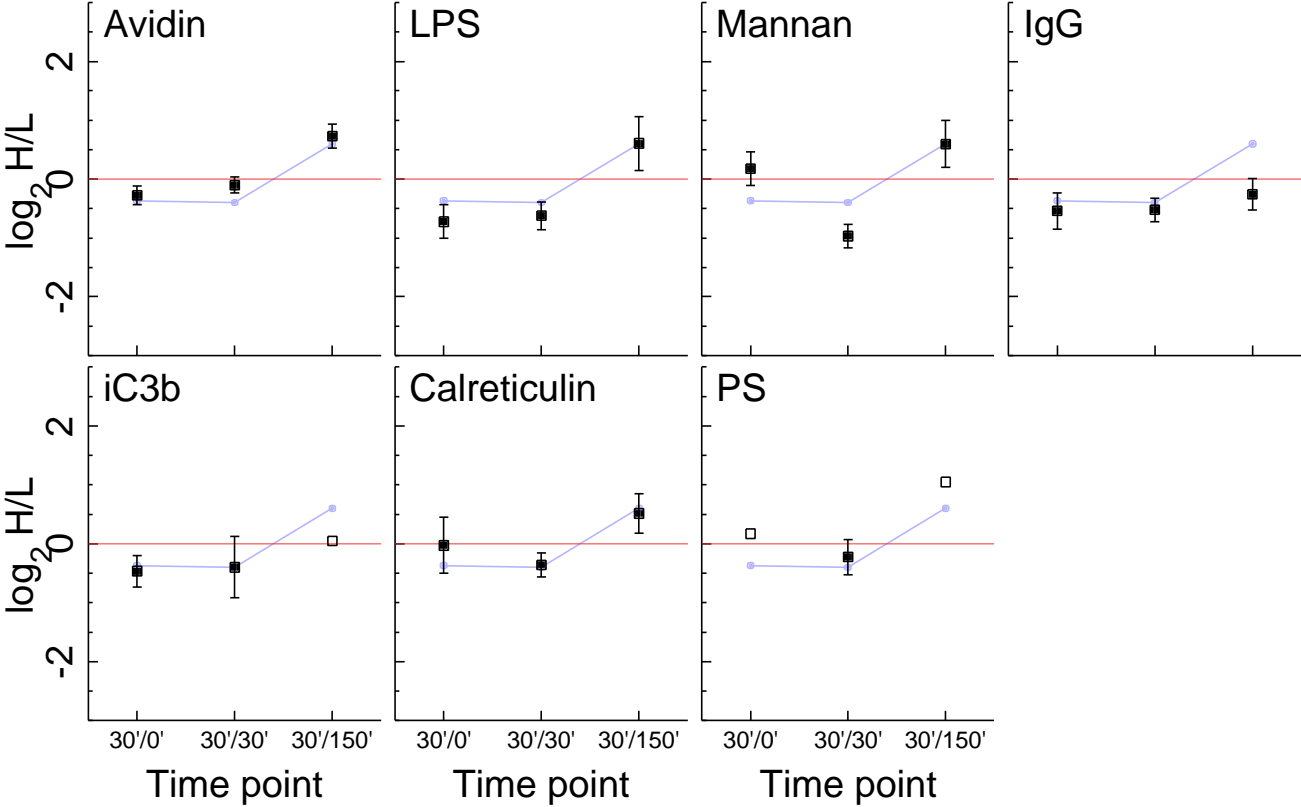

### sptlc2 (P97363)

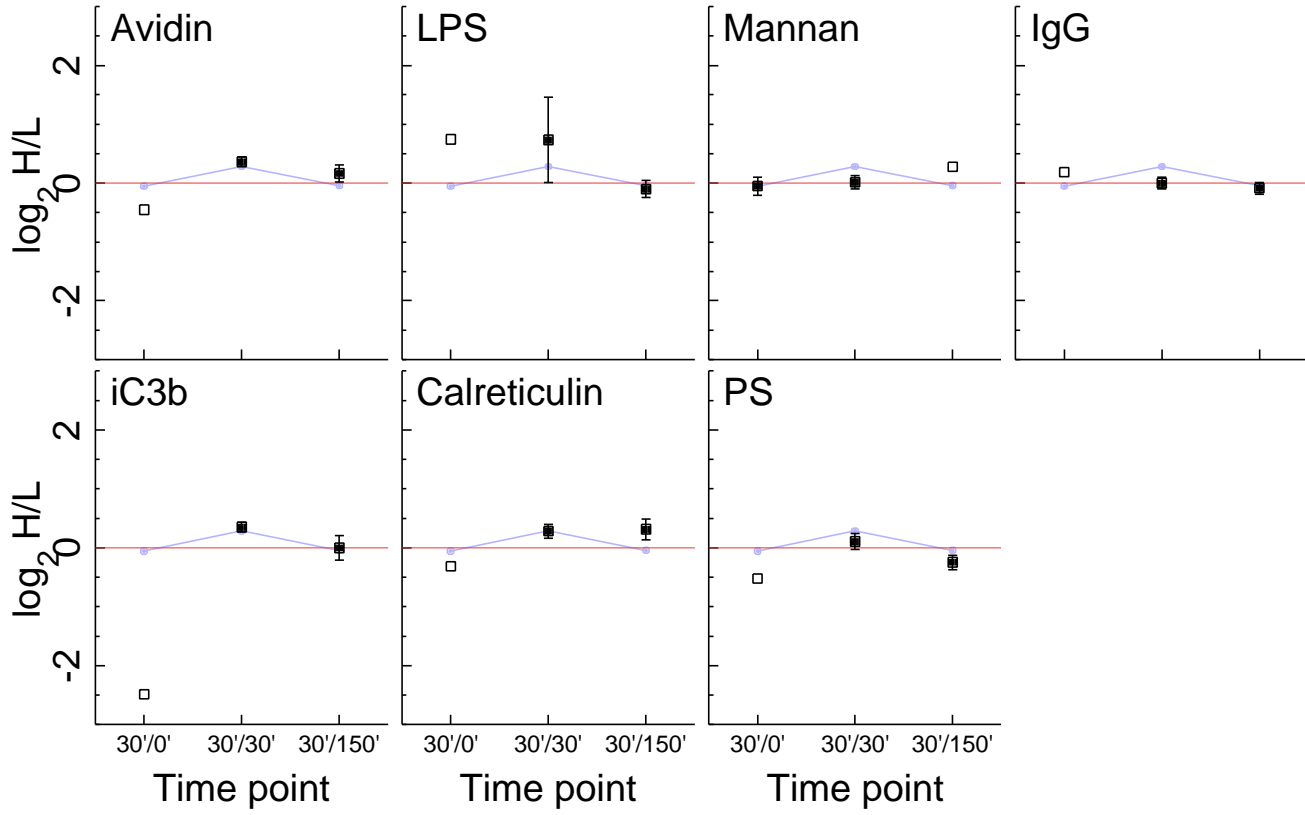

sqrdl (Q9R112)

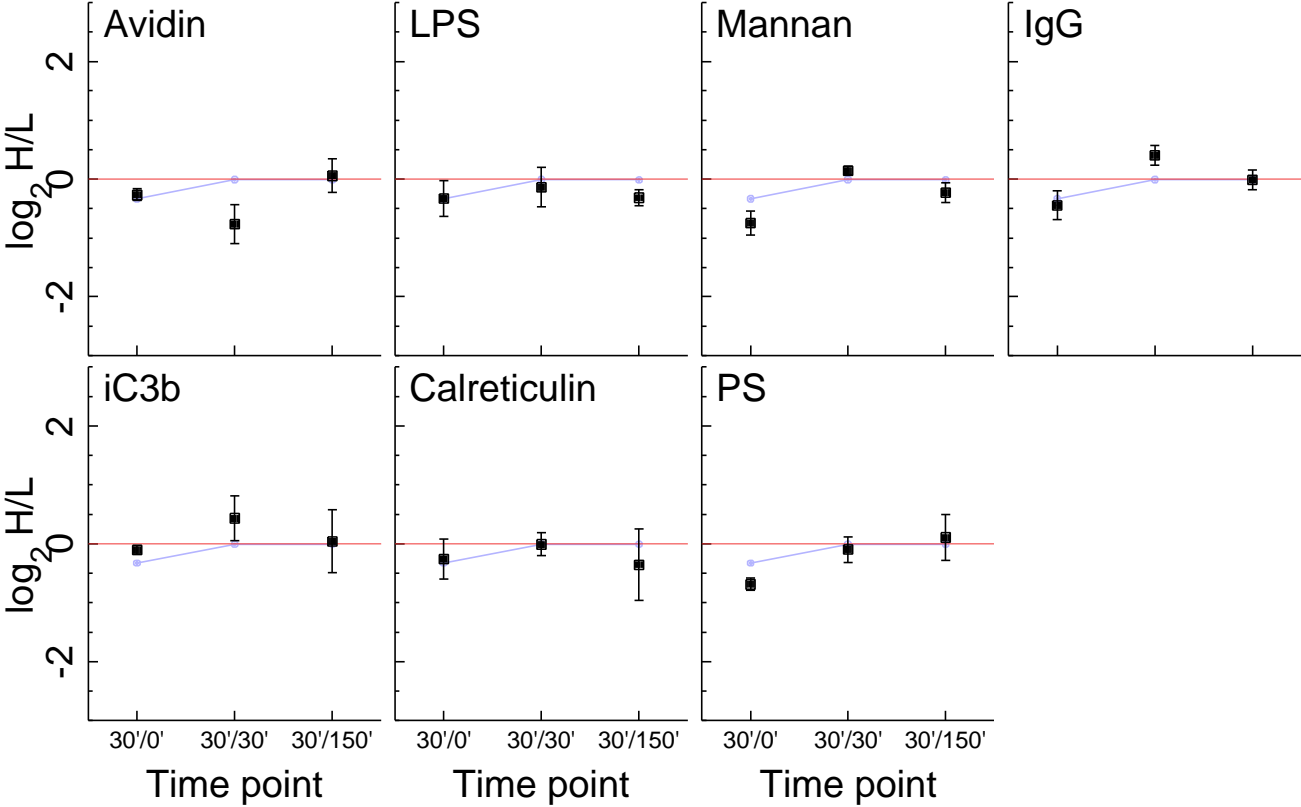

### sqstm1 (Q64337)

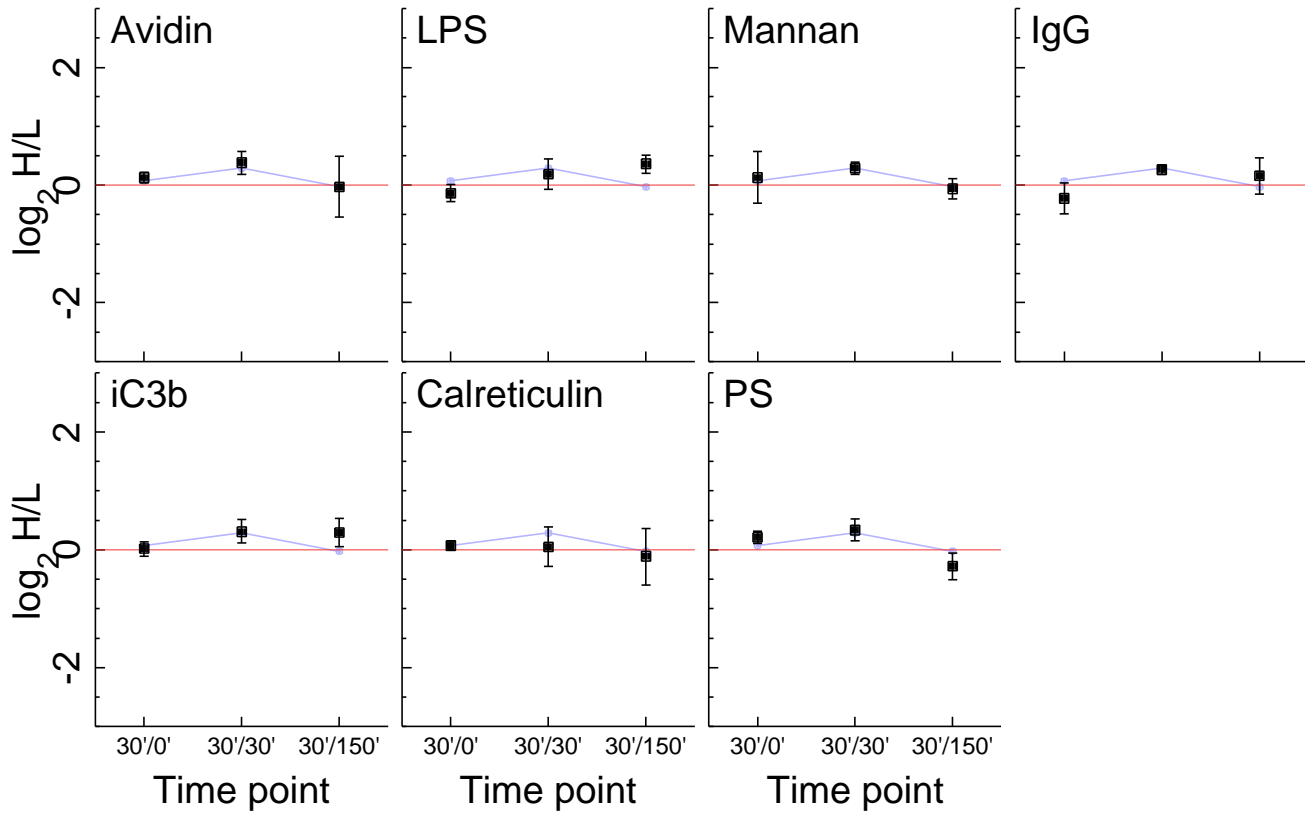

sri (Q6P069)

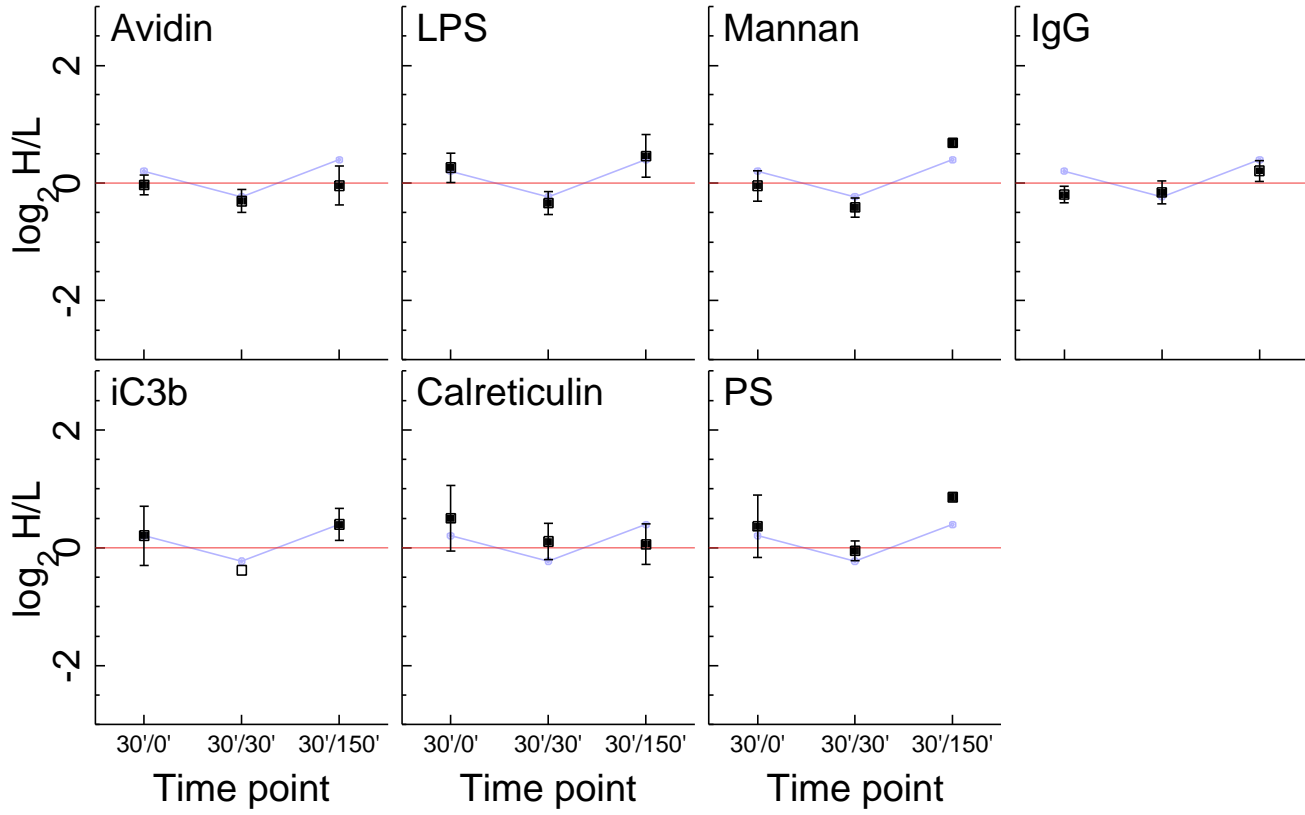



srp14 (P16254)

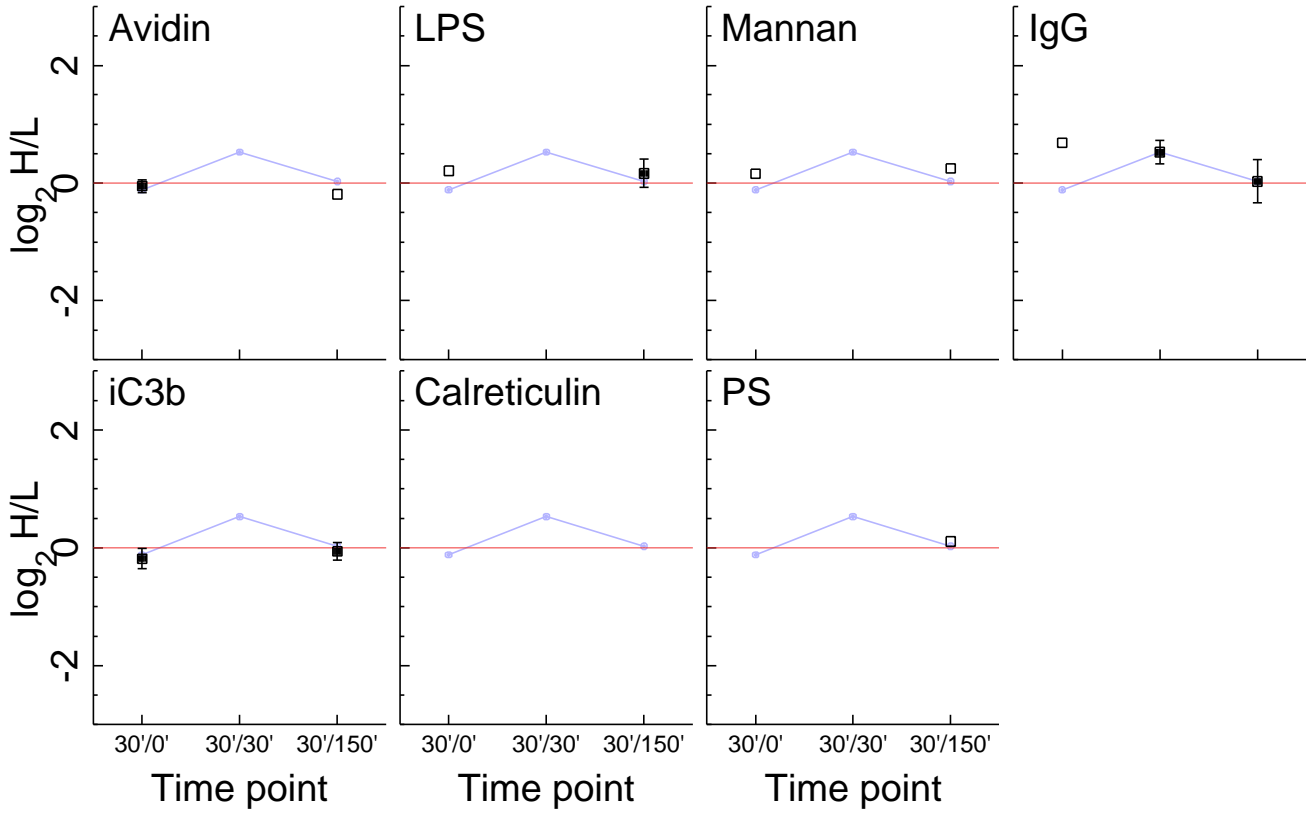

srp19 (Q9D104)

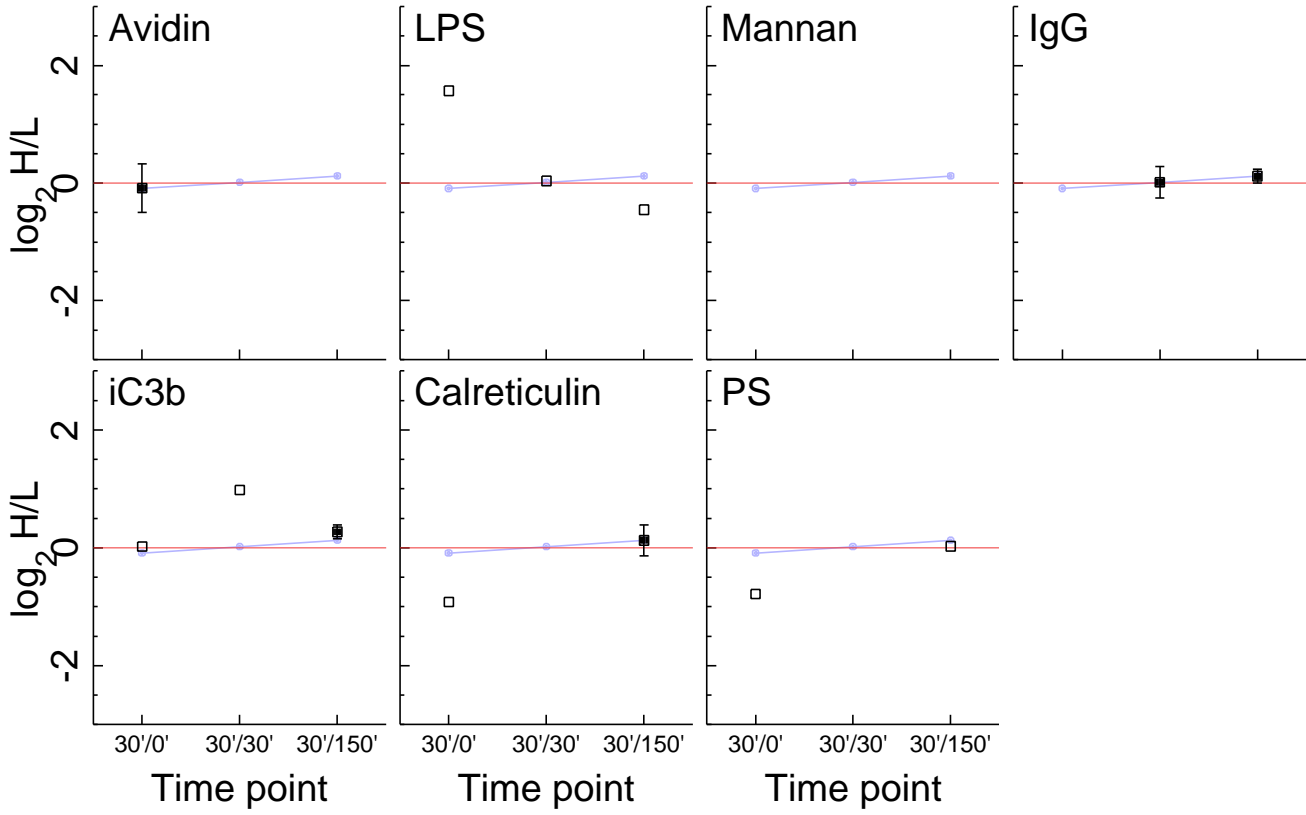

srp54 (P14576)

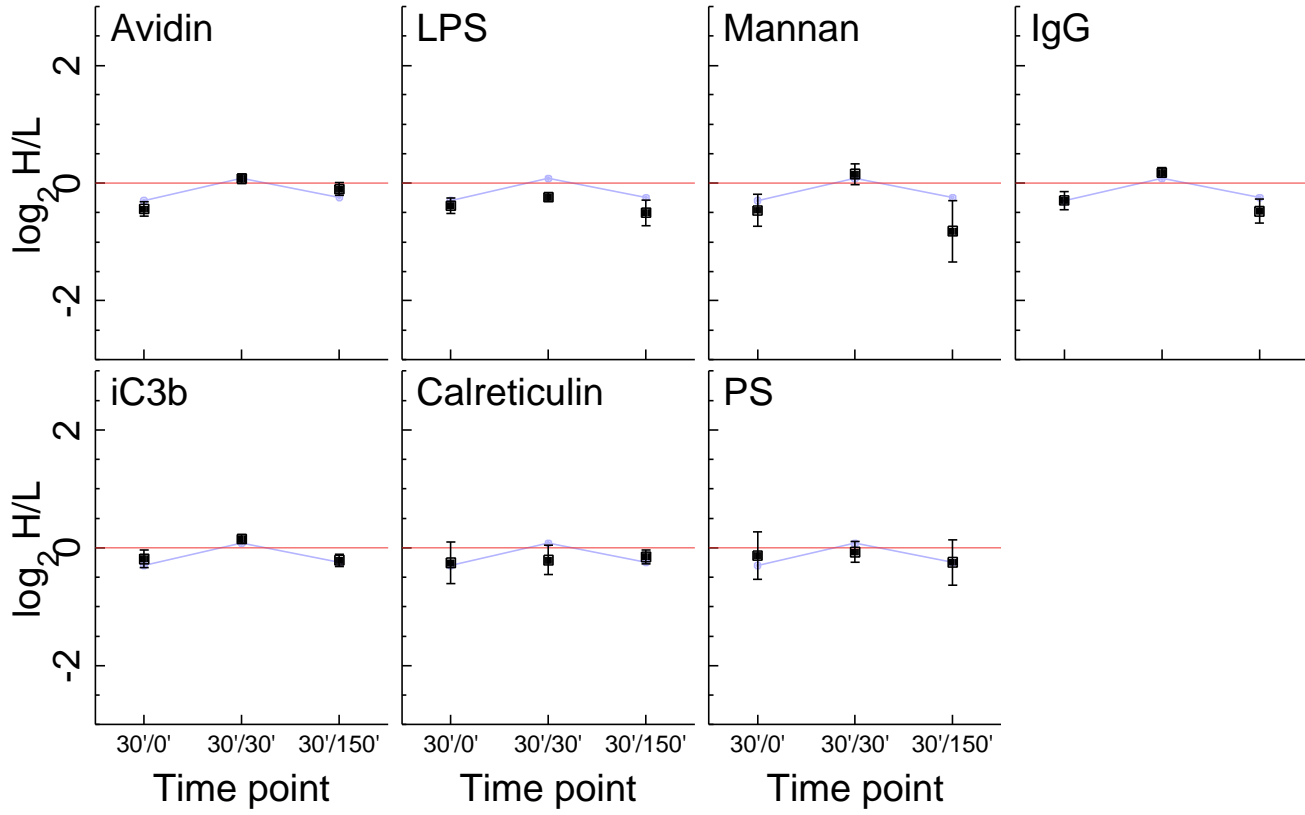

srp68 (Q8BMA6)

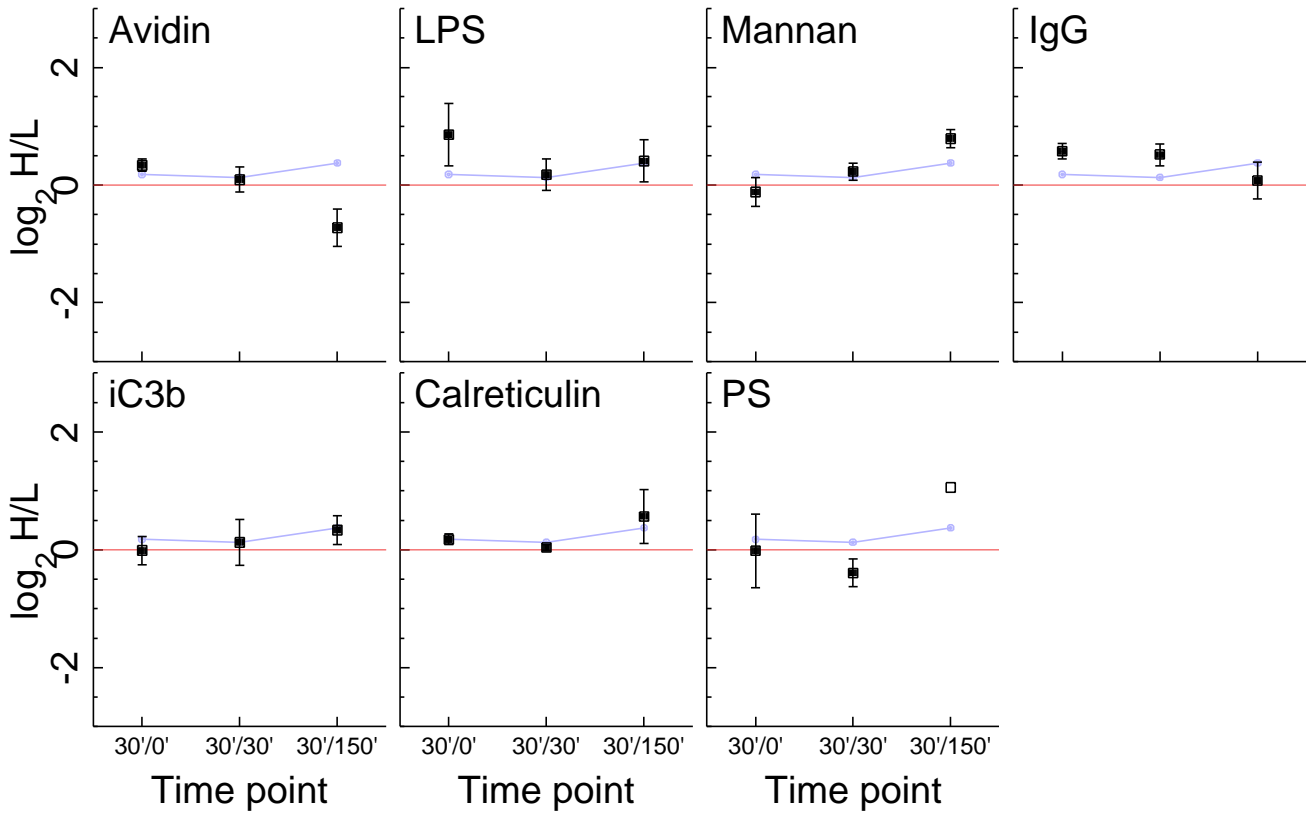

srp9 (P49962)

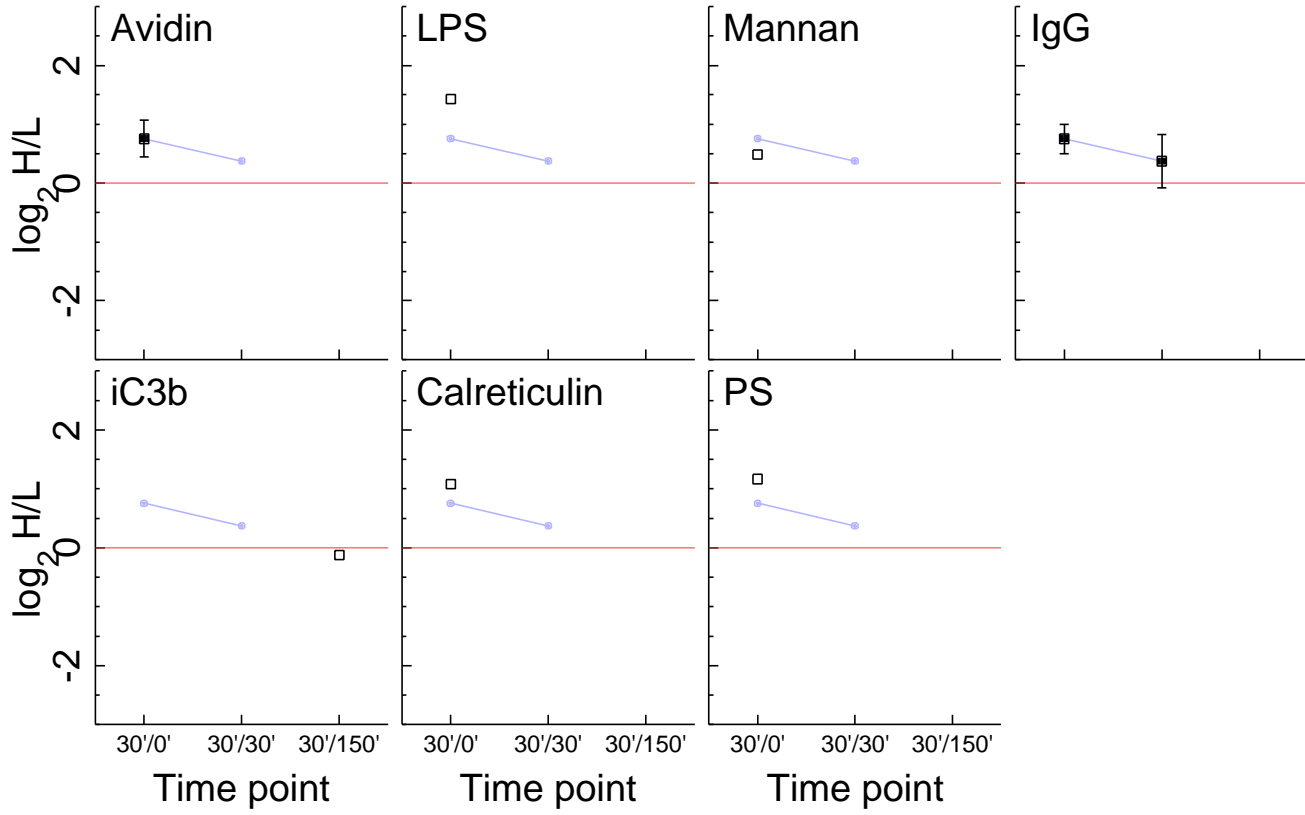

### srsf3 (P84104)

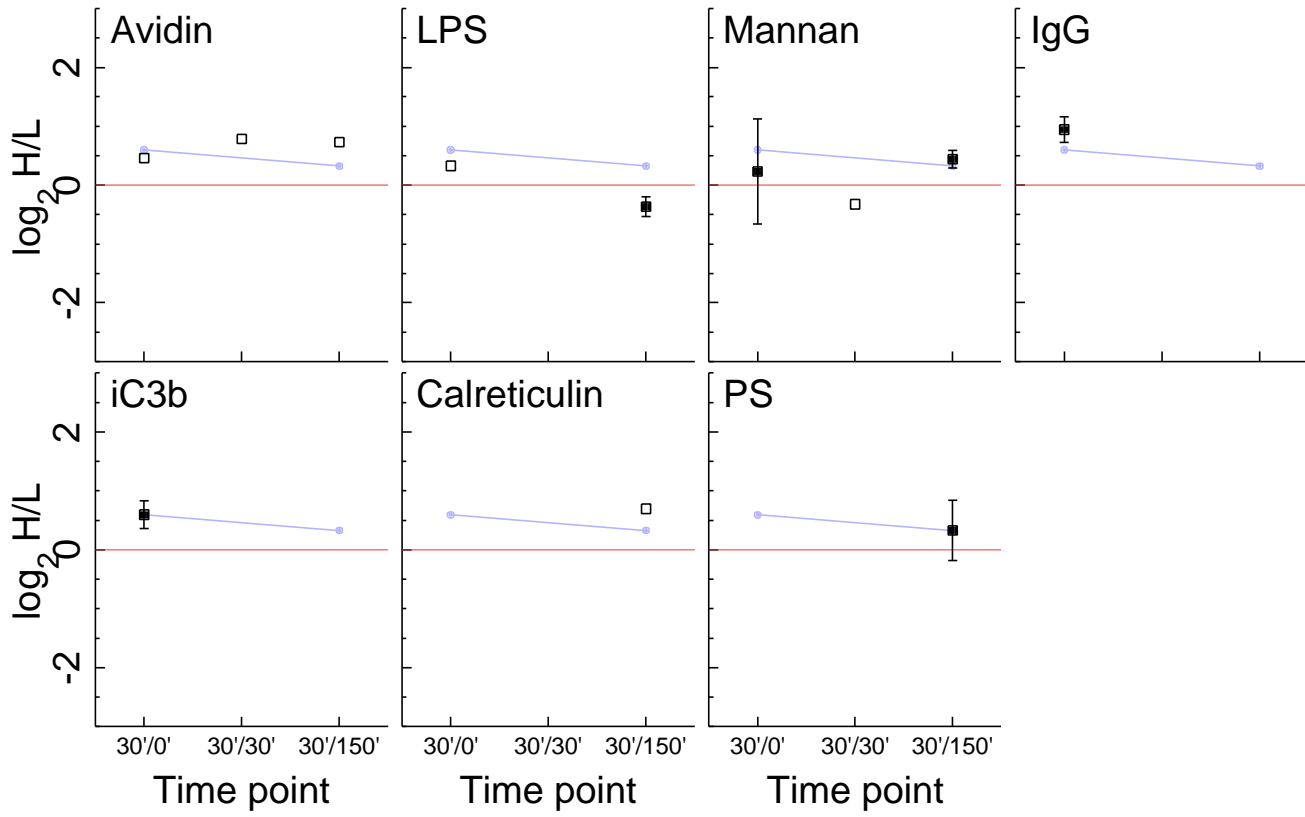

ssr1 (Q9CY50)

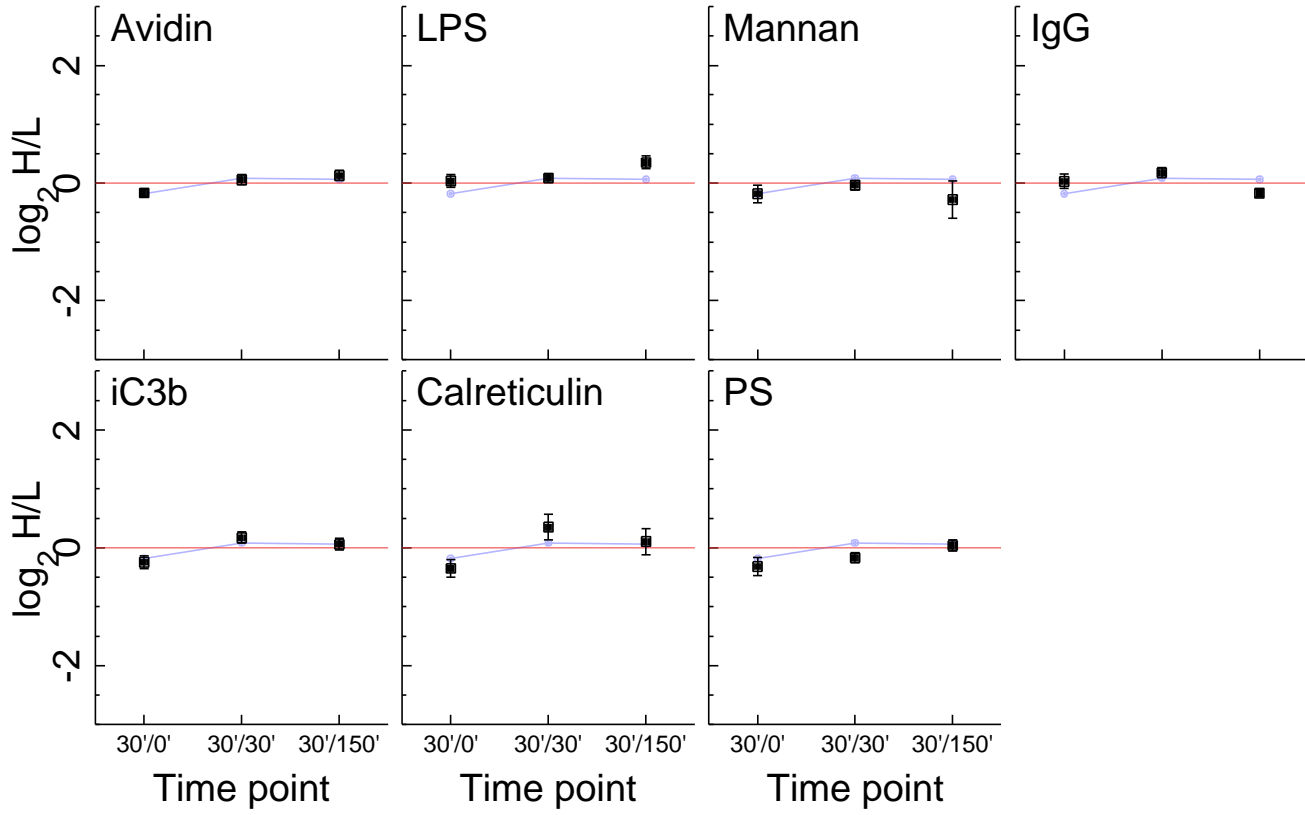

ssr3 (Q9DCF9)

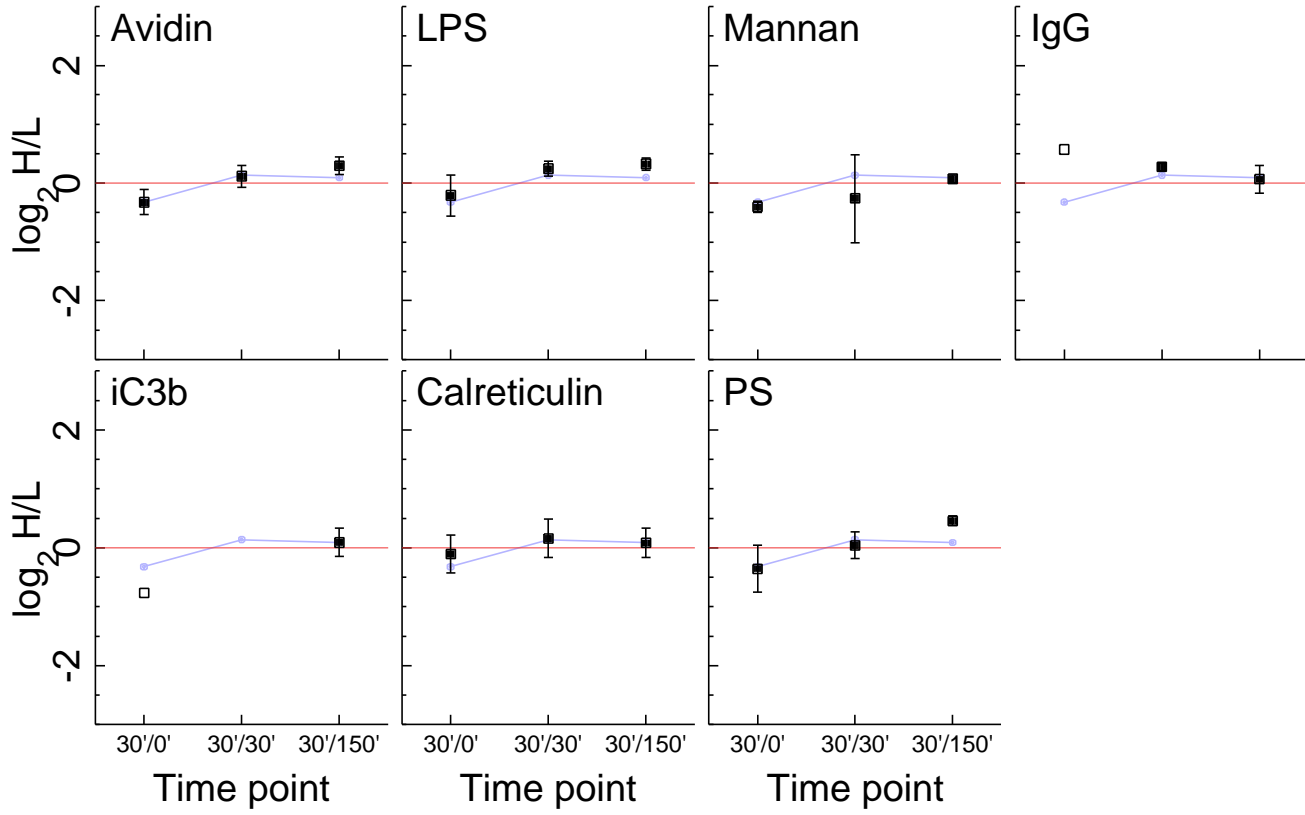



### ssr4 (Q9D8L3)

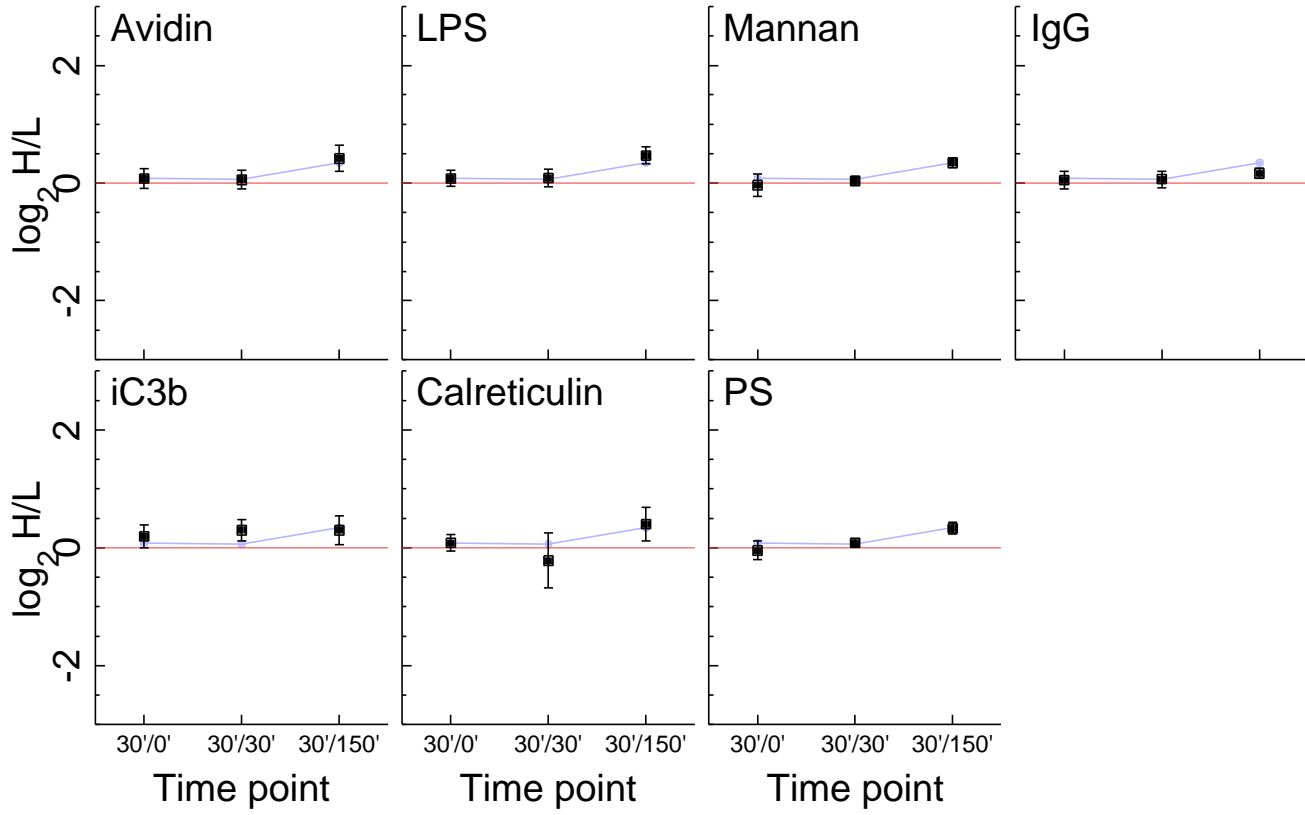

ssrp1 (Q08943)

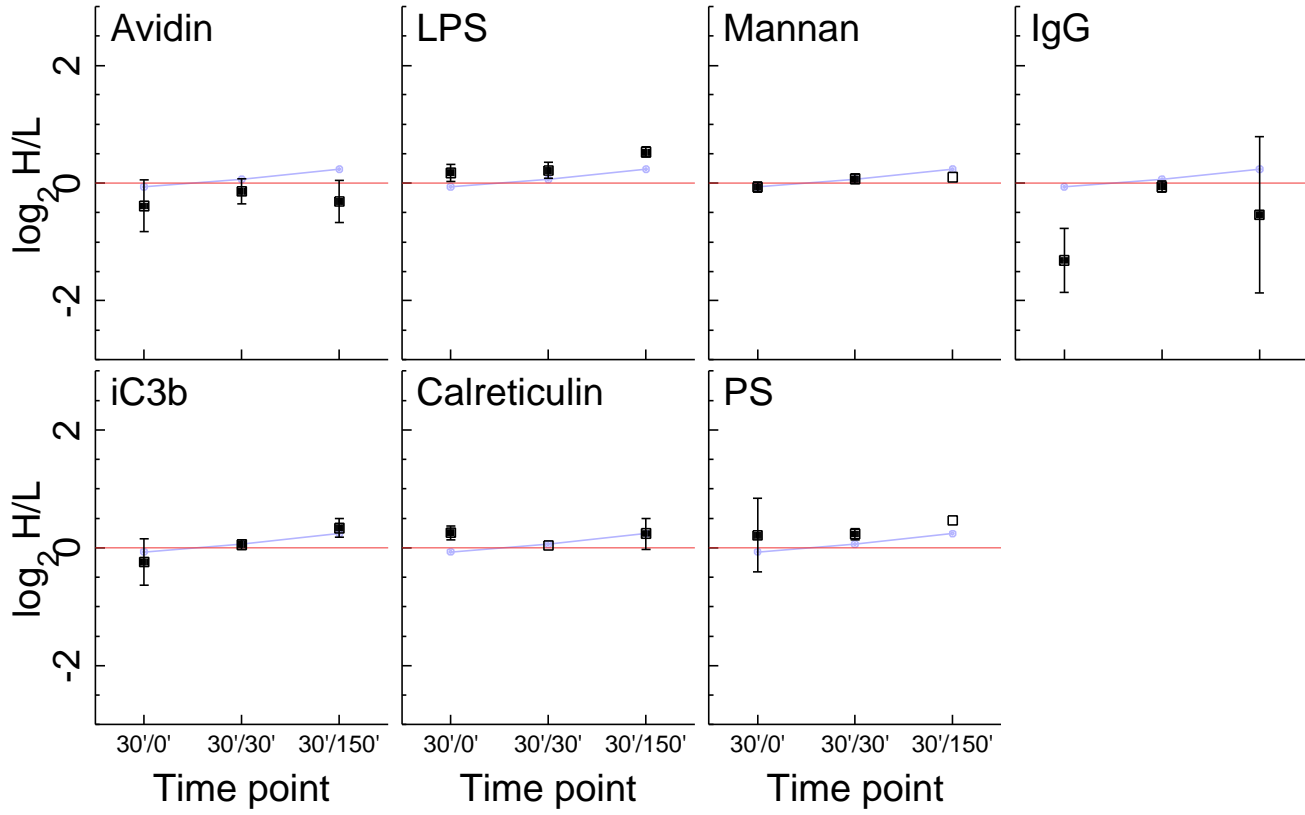

st13 (Q99L47)

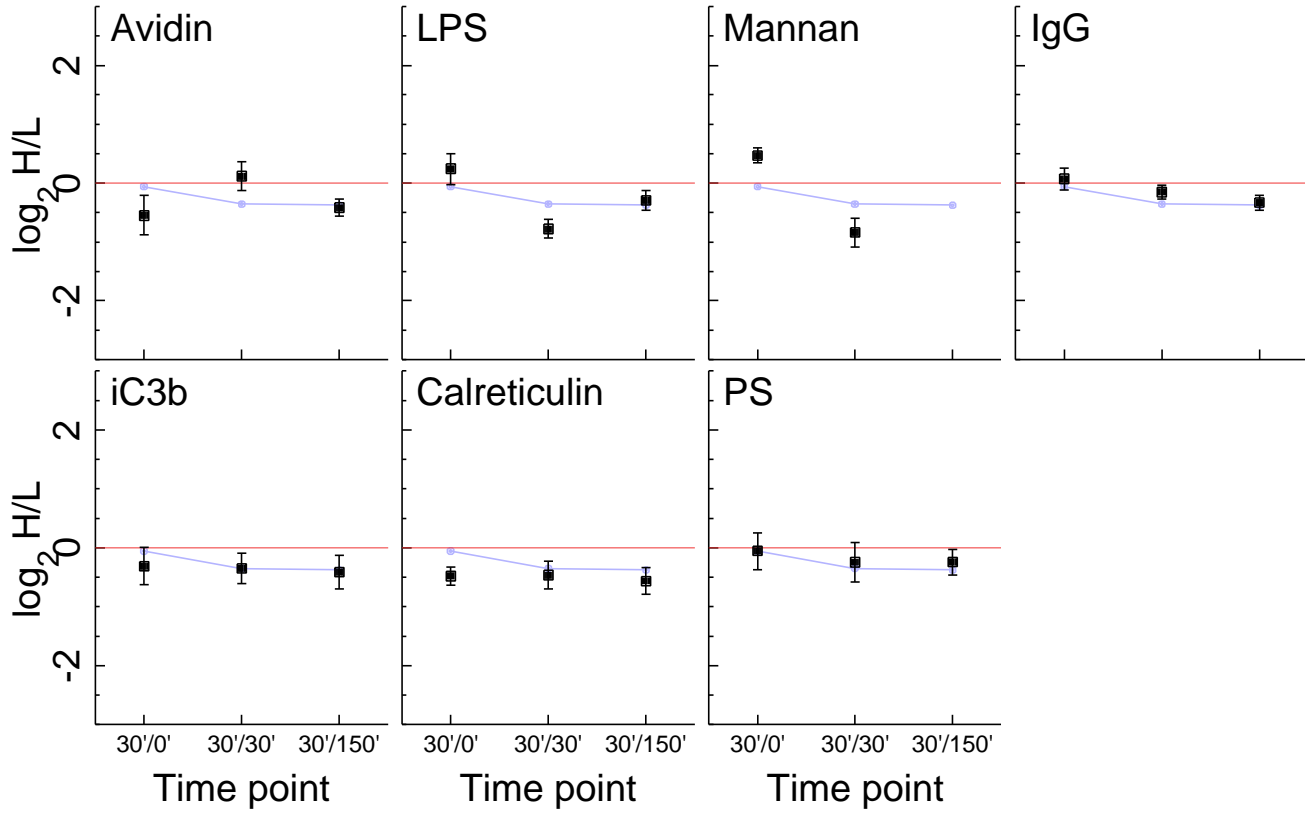

st3gal1 (P54751)

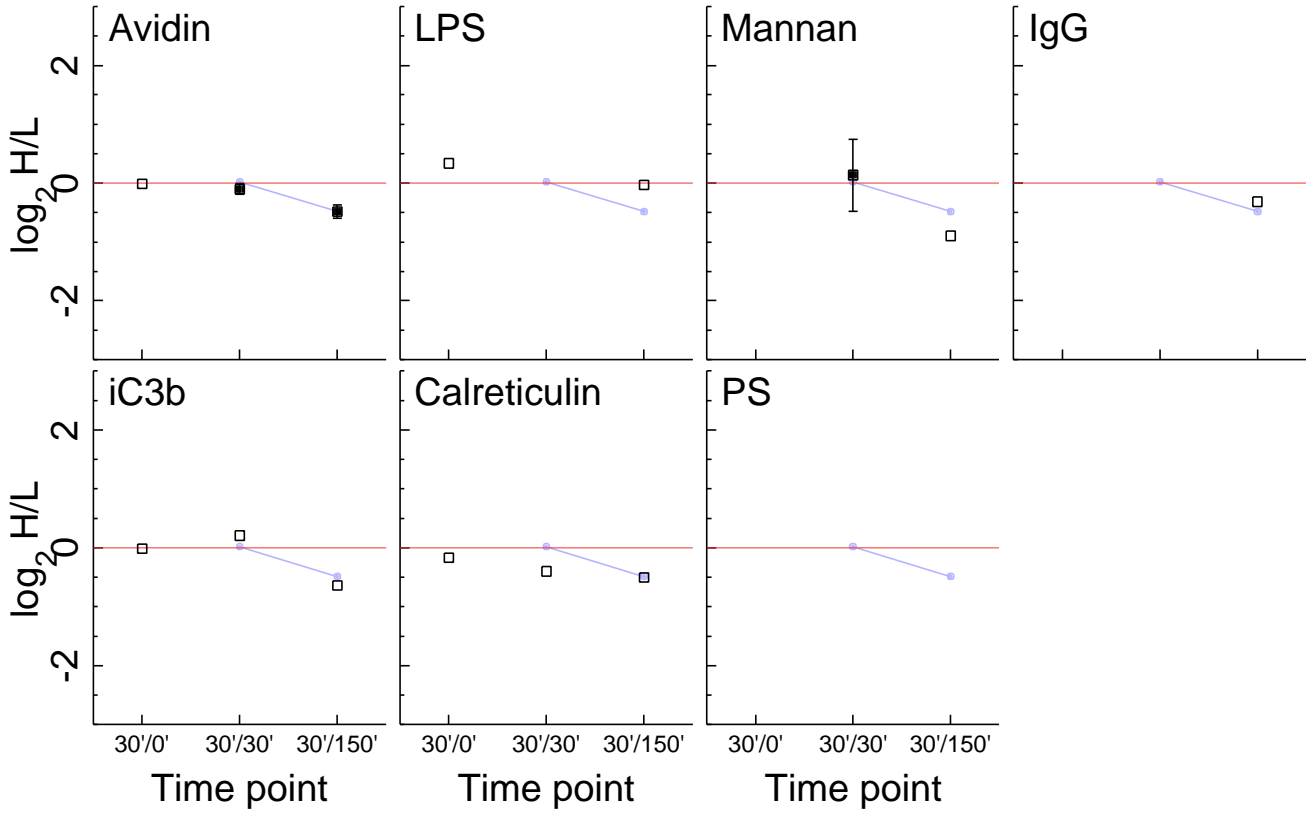

stab1 (G3X973)

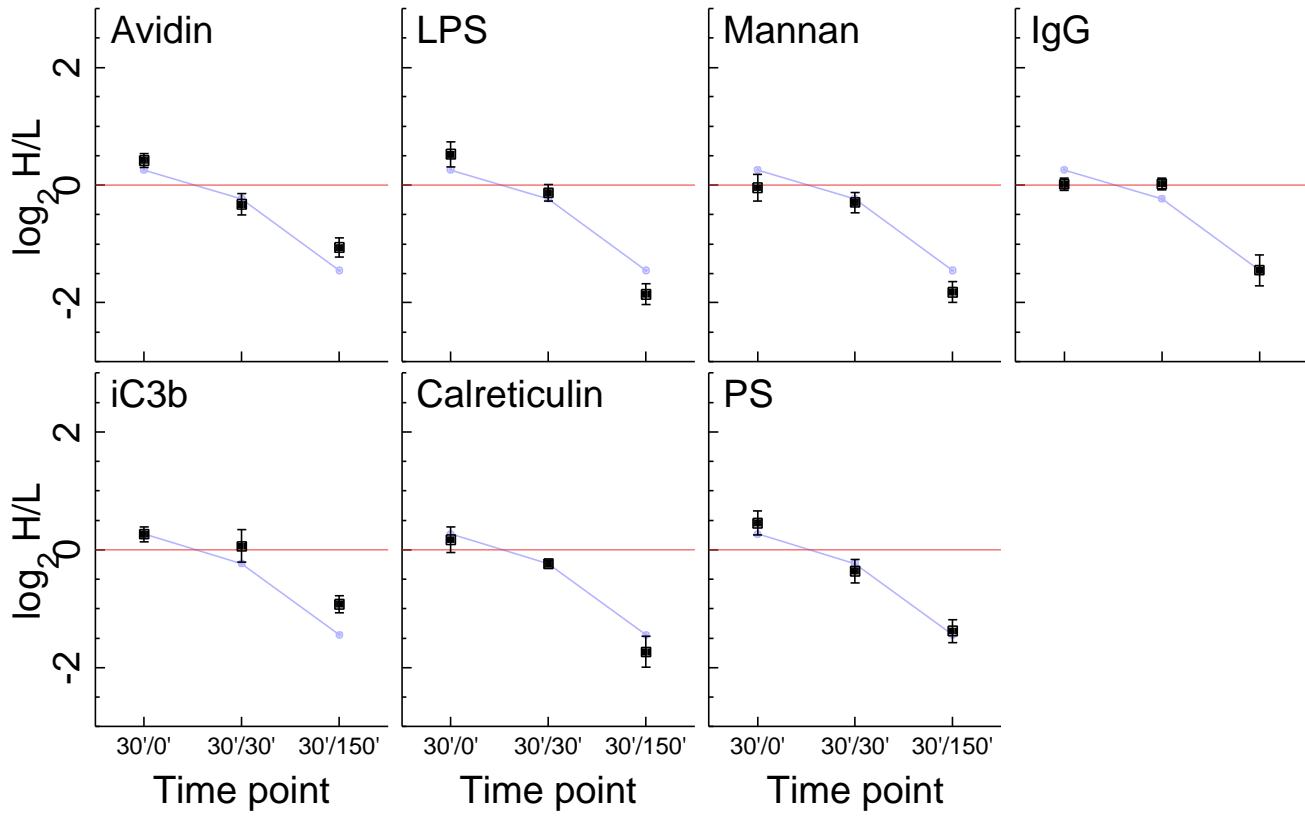

stam2 (O88811)

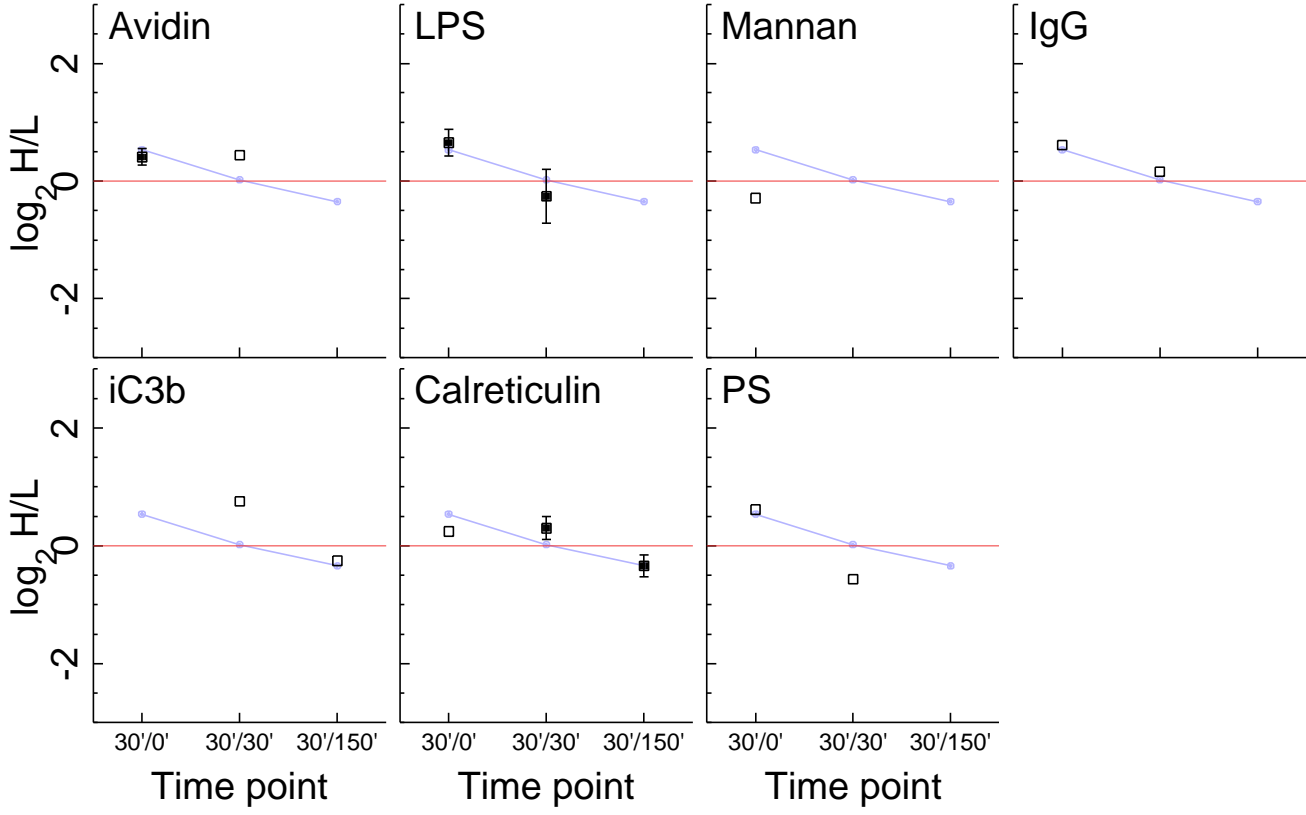

stambpl1 (Q76N33)

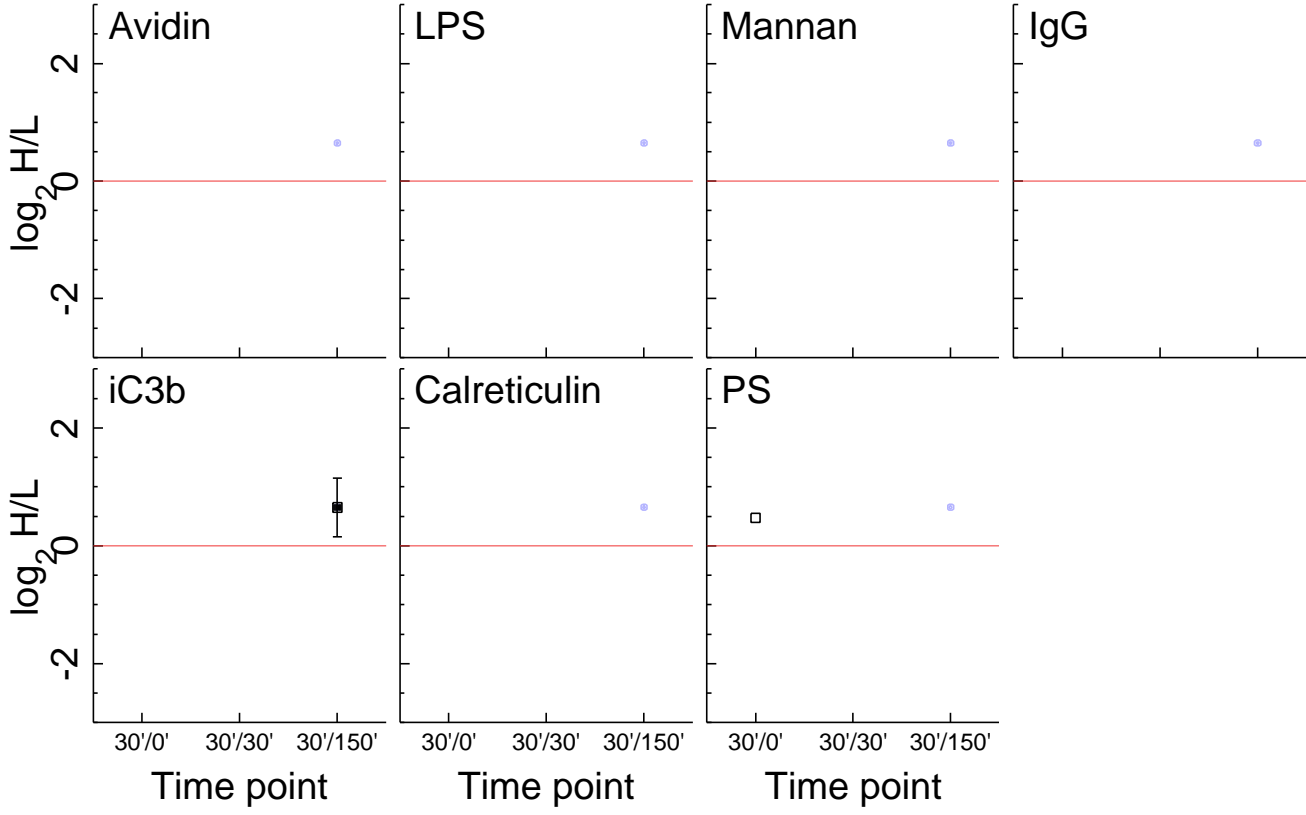

stam (P70297)

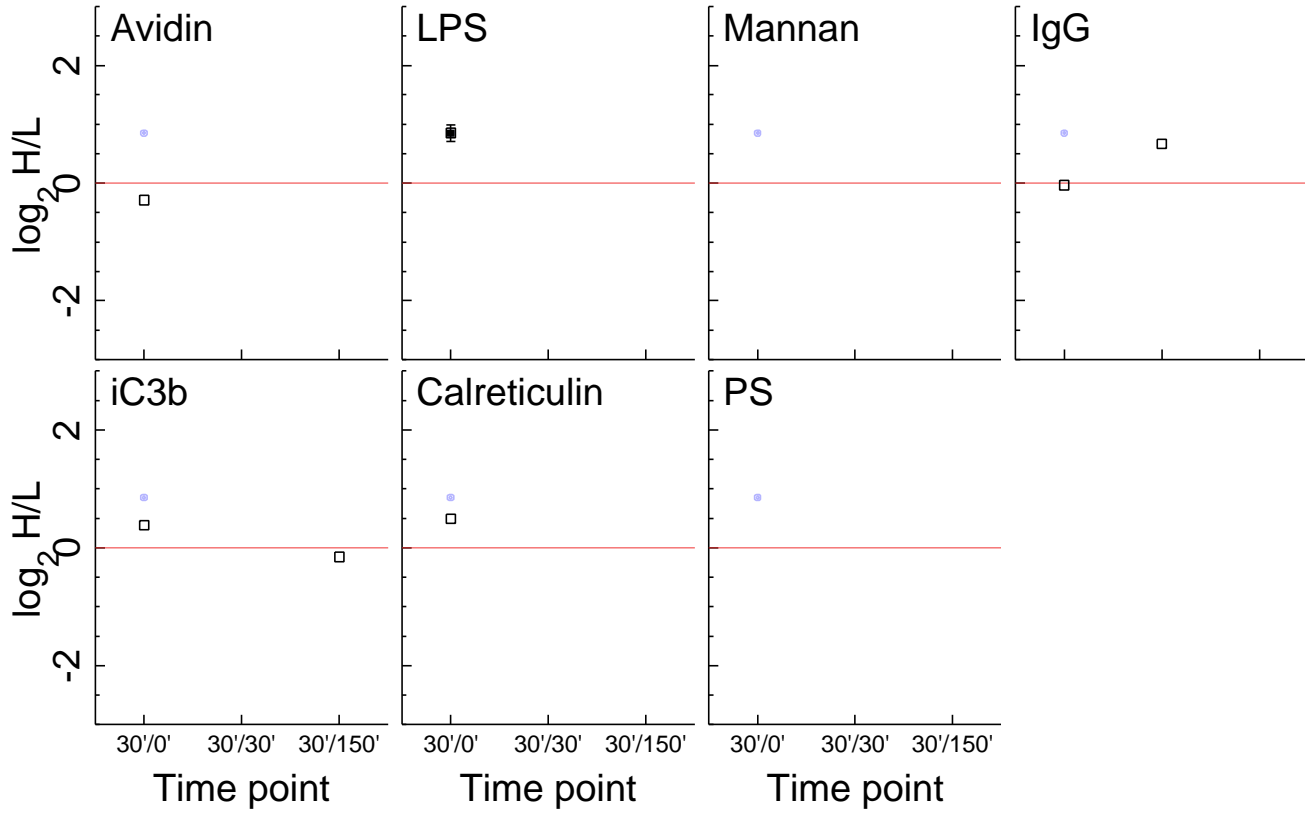



stard3nl (Q9DCI3)

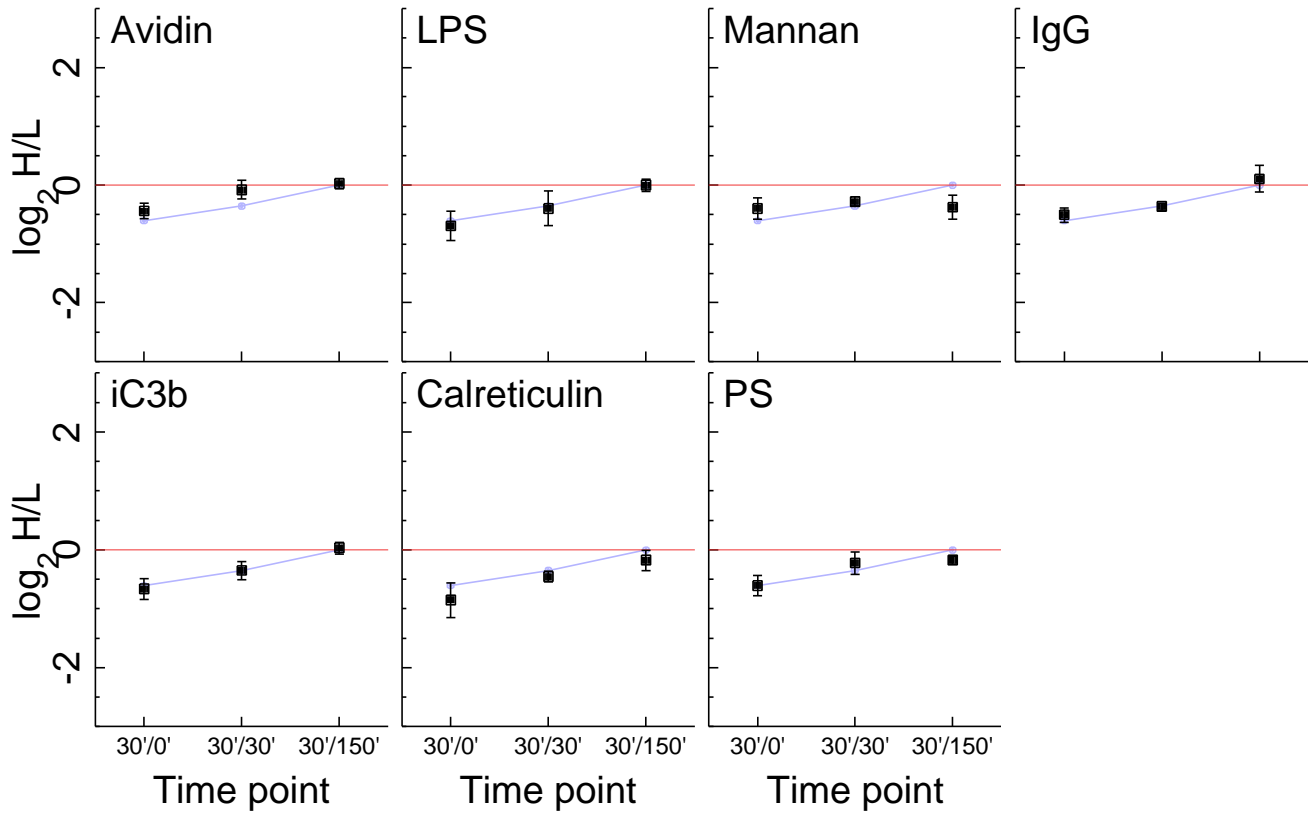

stard3 (Q61542)

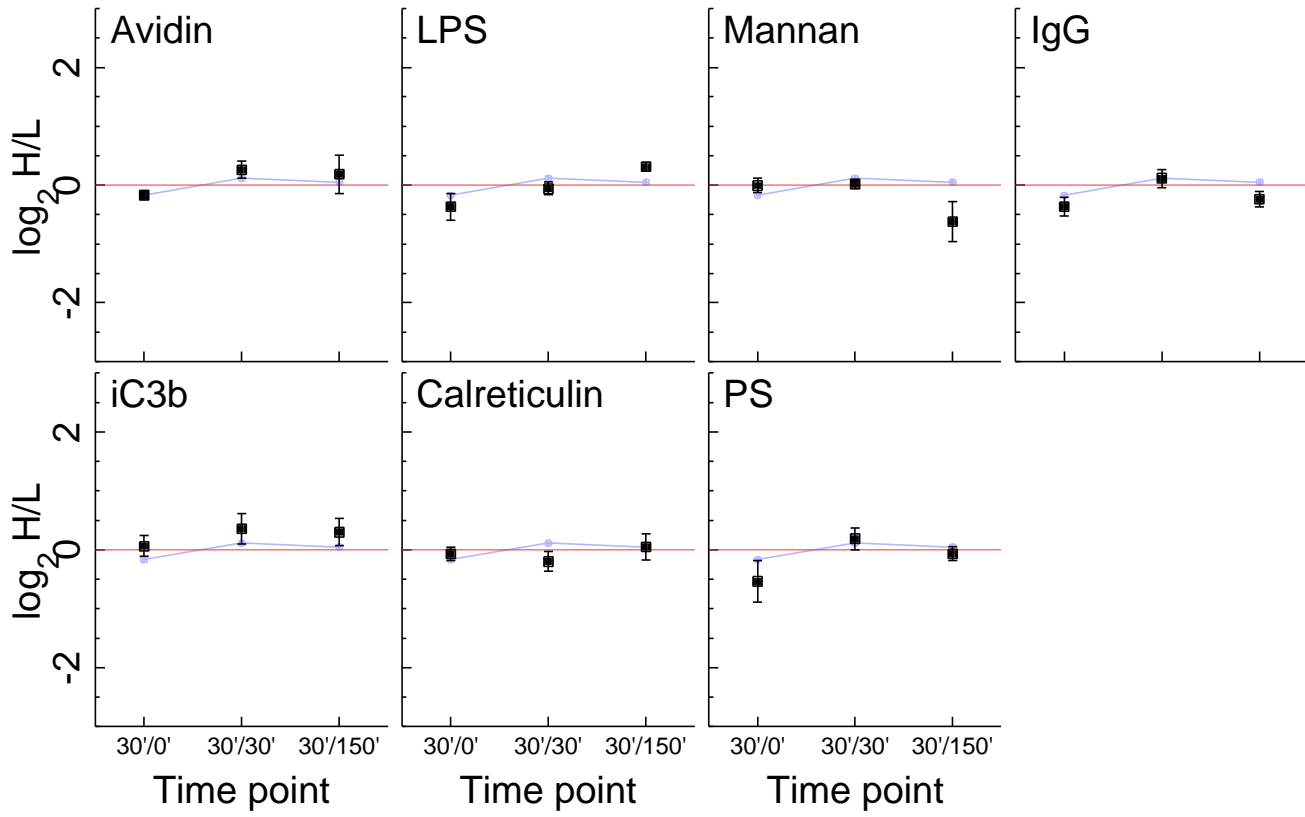

stat1 (Q8C3V4)

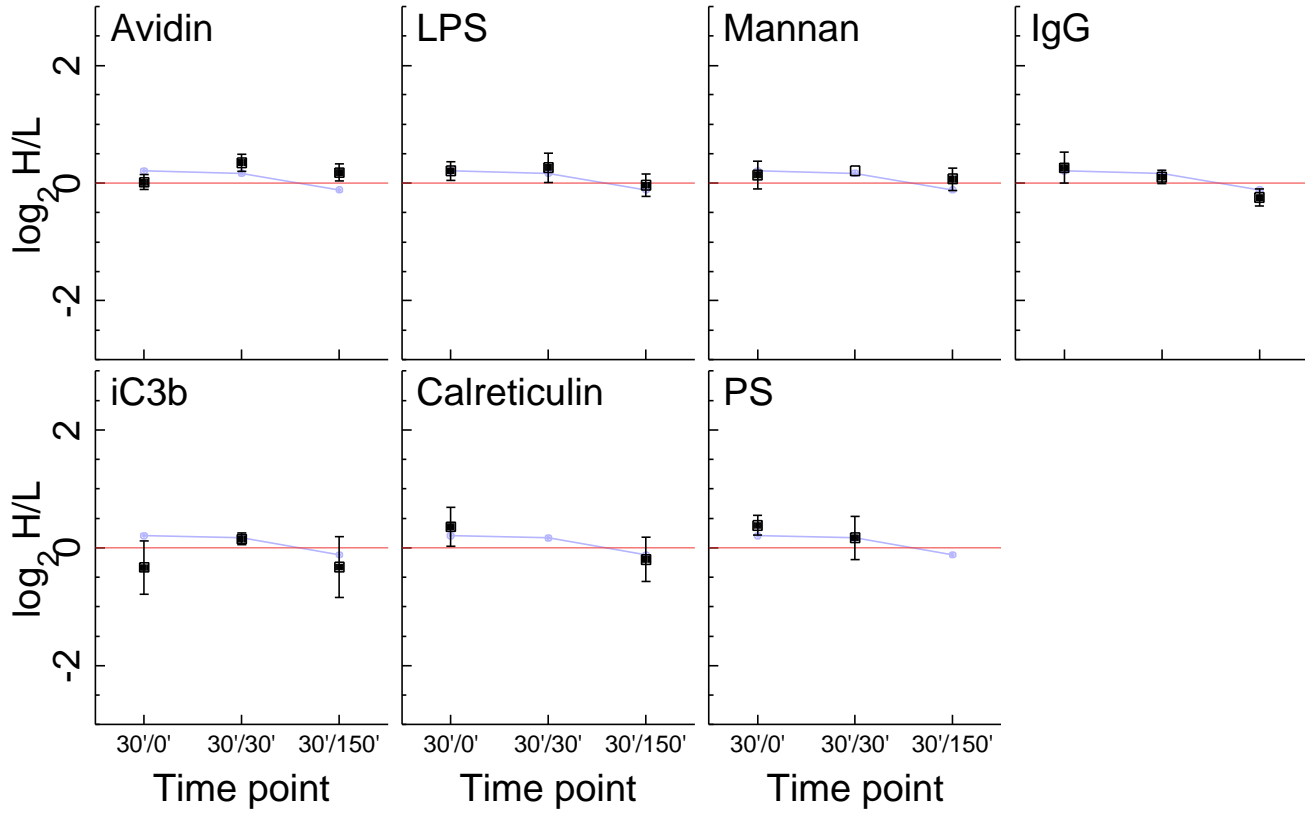

steap3 (E9QN92)

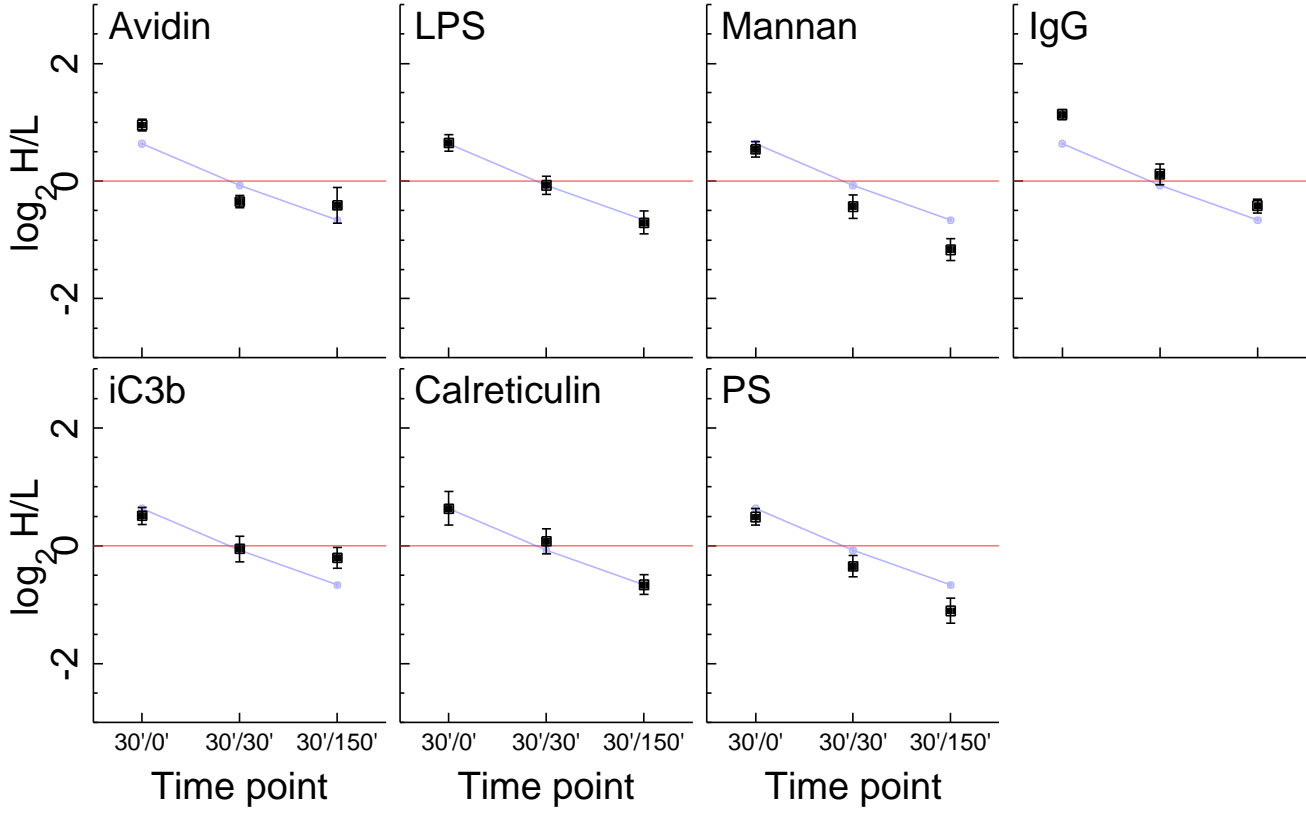

### stk11ip (Q3TAA7)

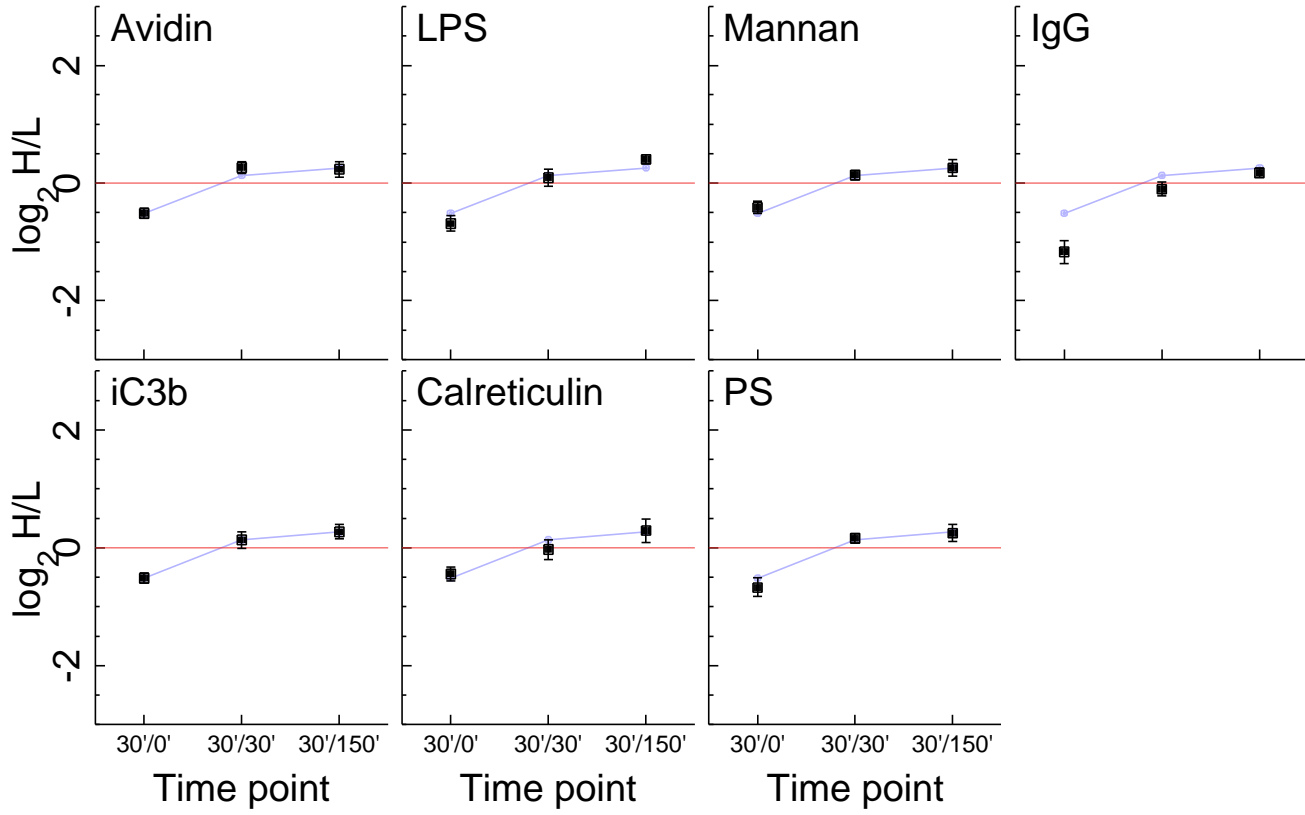

stk24 (Q99KH8)

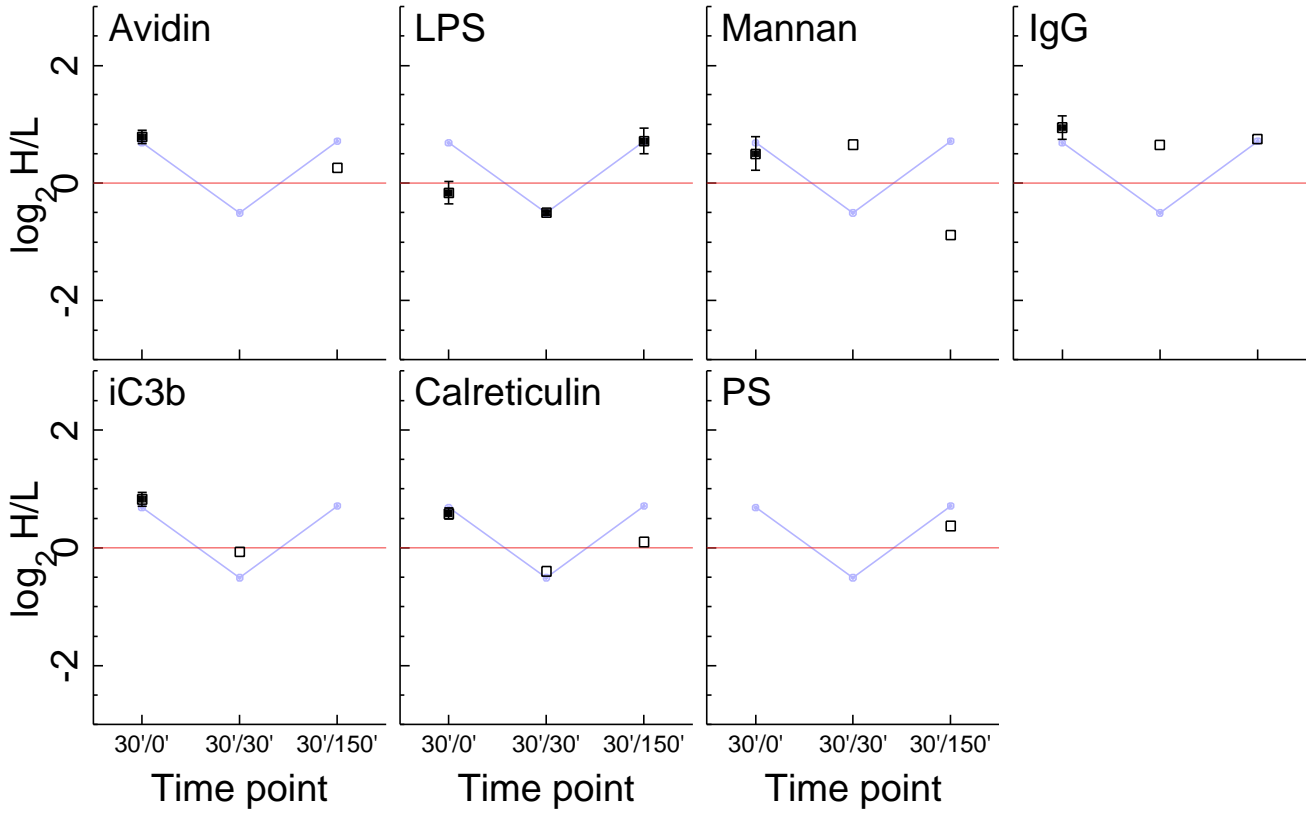

stk38 (Q91VJ4)

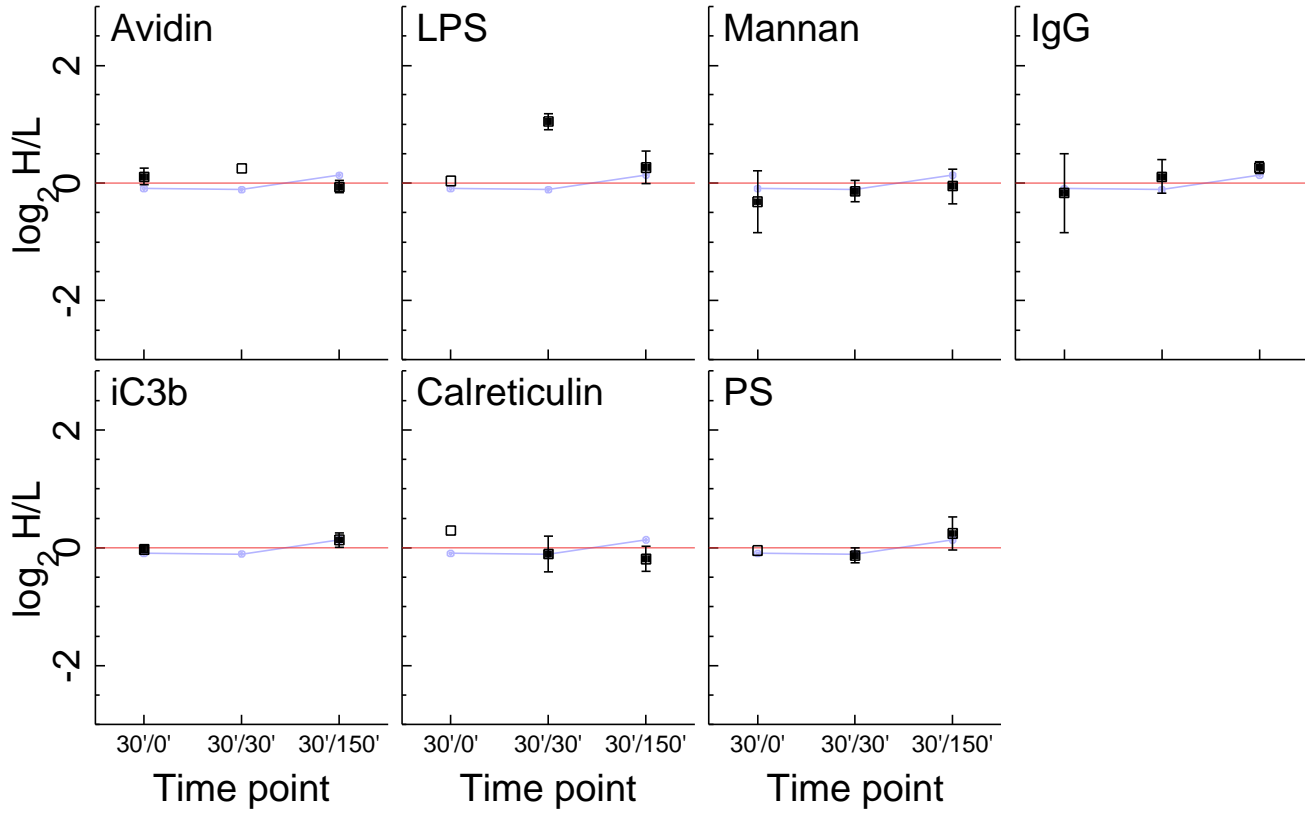

### stk3 (Q9JI10)

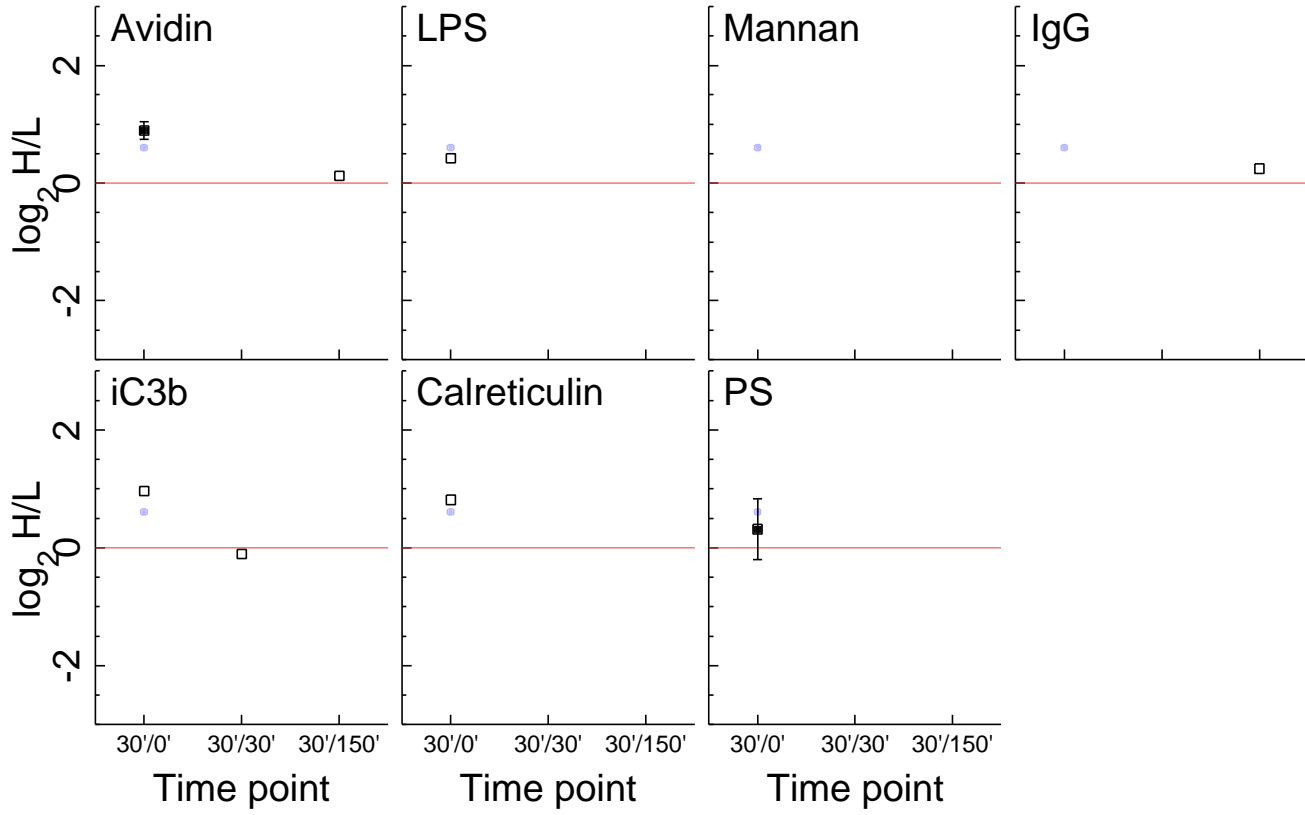



stmn1 (P54227)

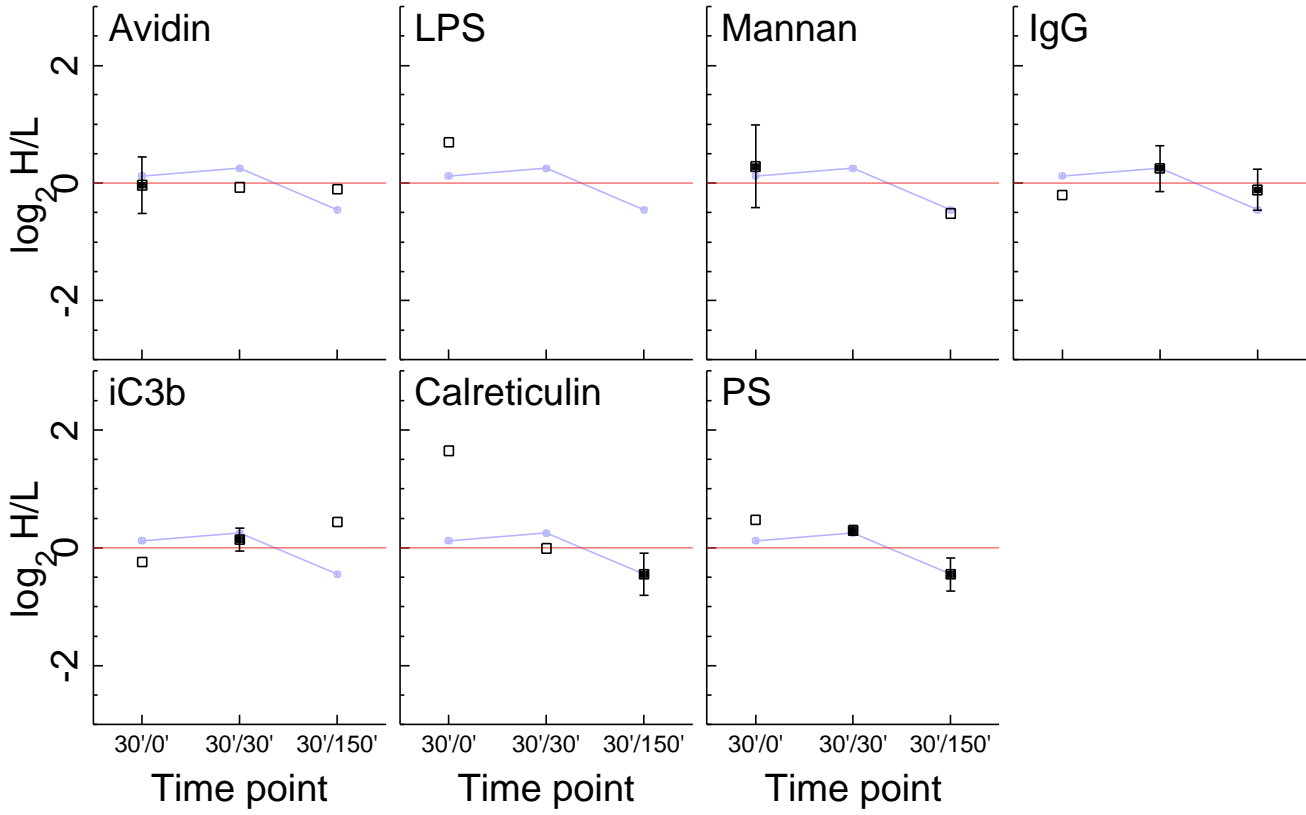

stmn2 (P55821)

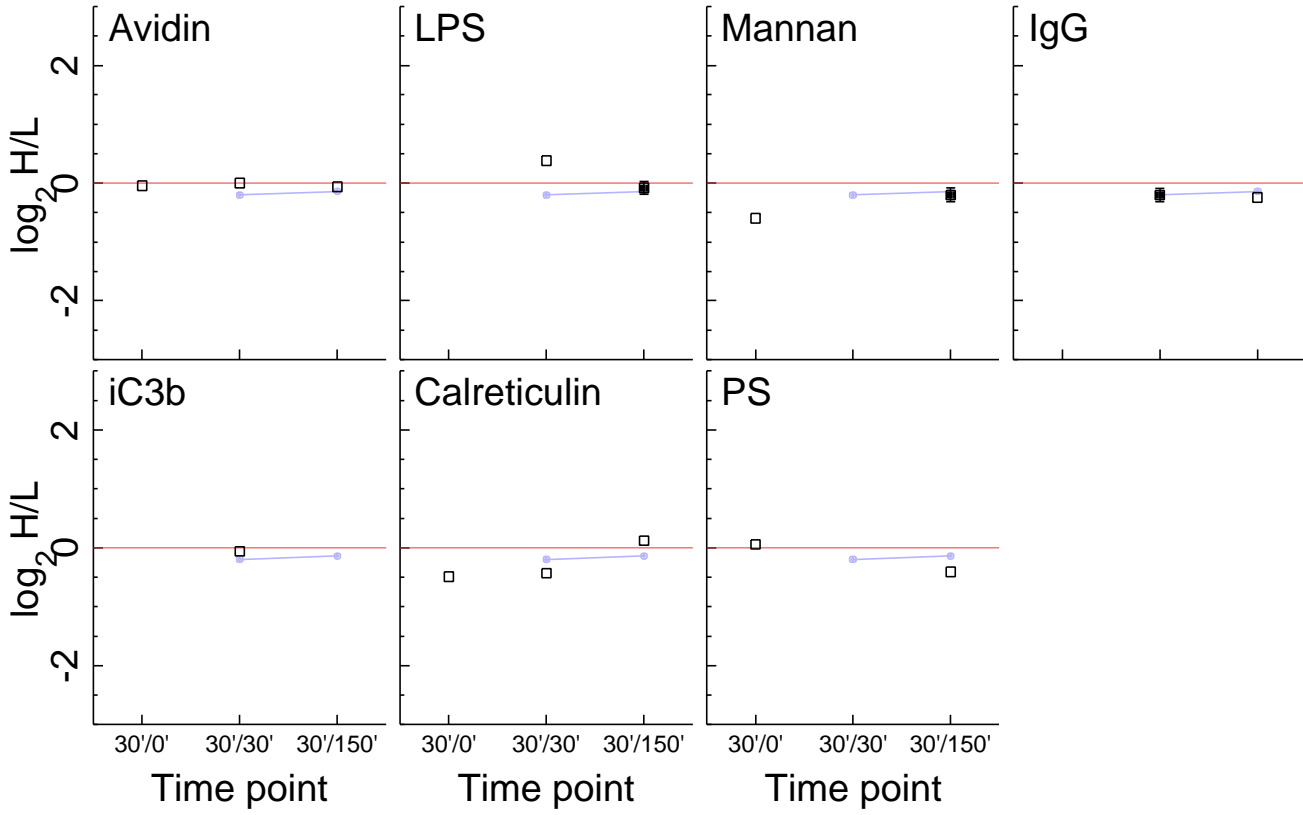

stom (P54116)

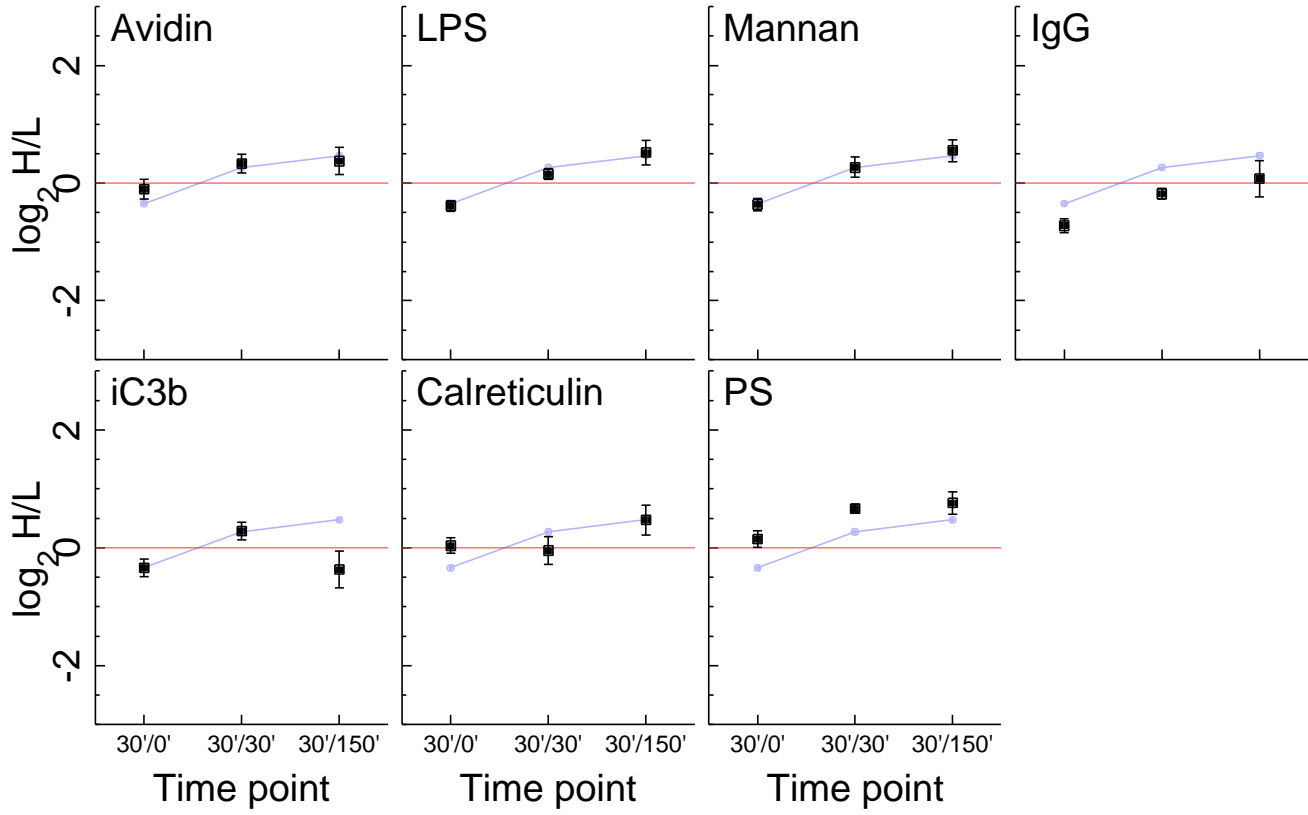

strn (O55106)

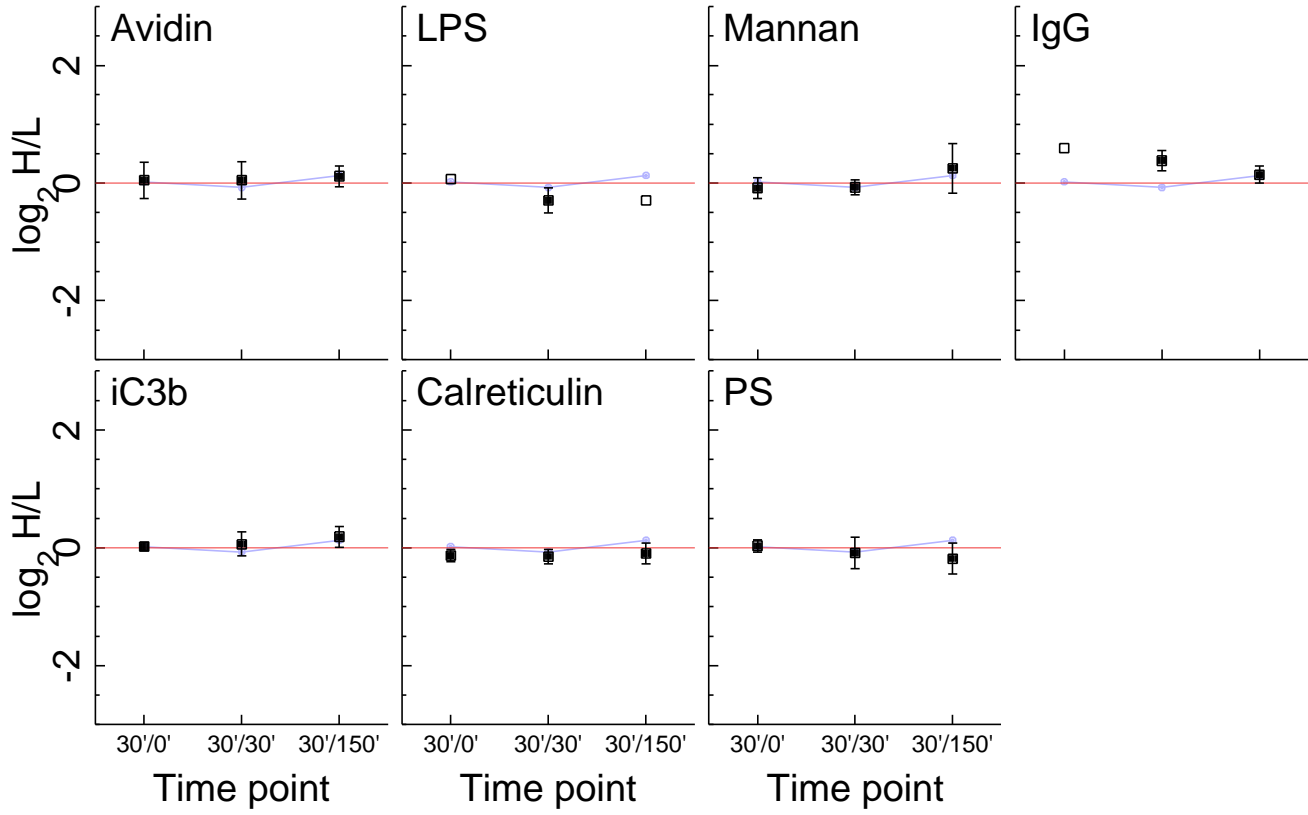

sts (P50427)

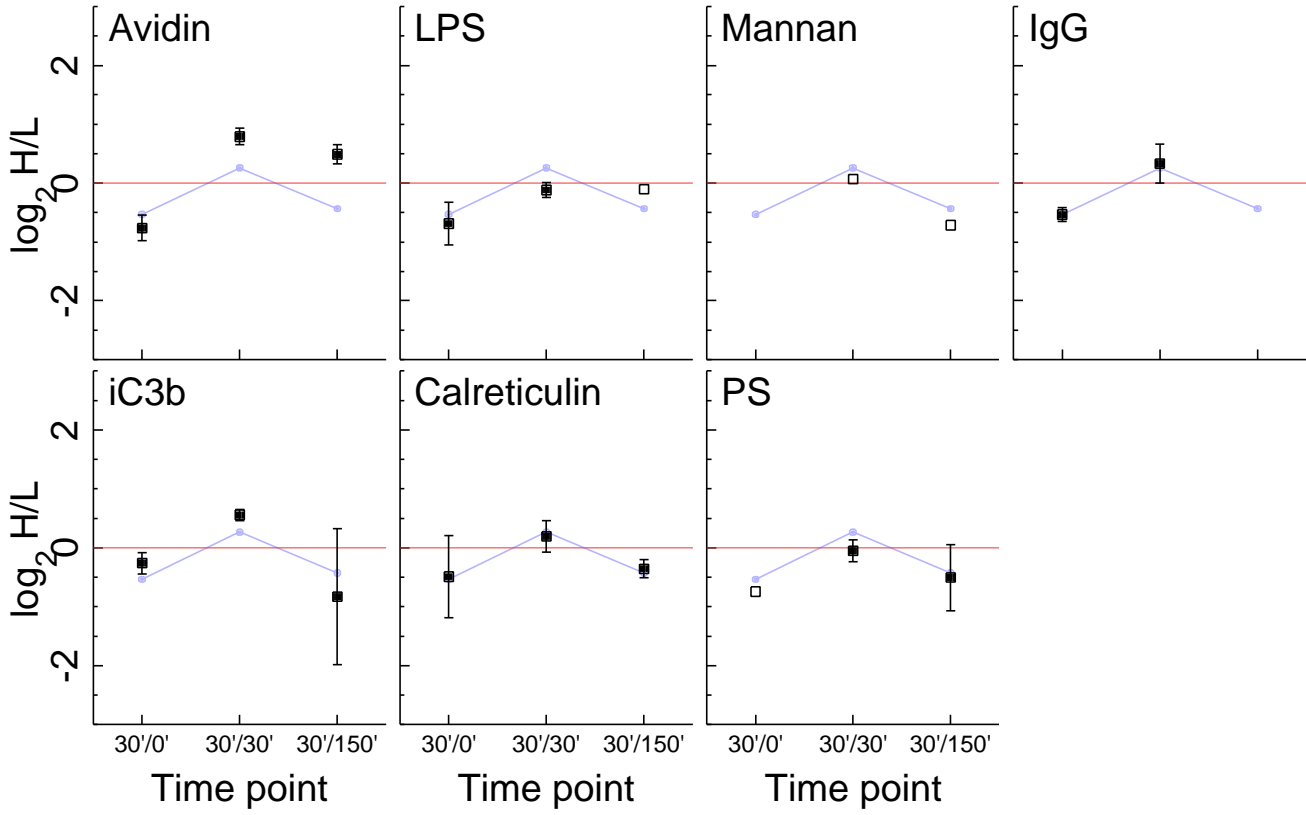

### stt3a (P46978)

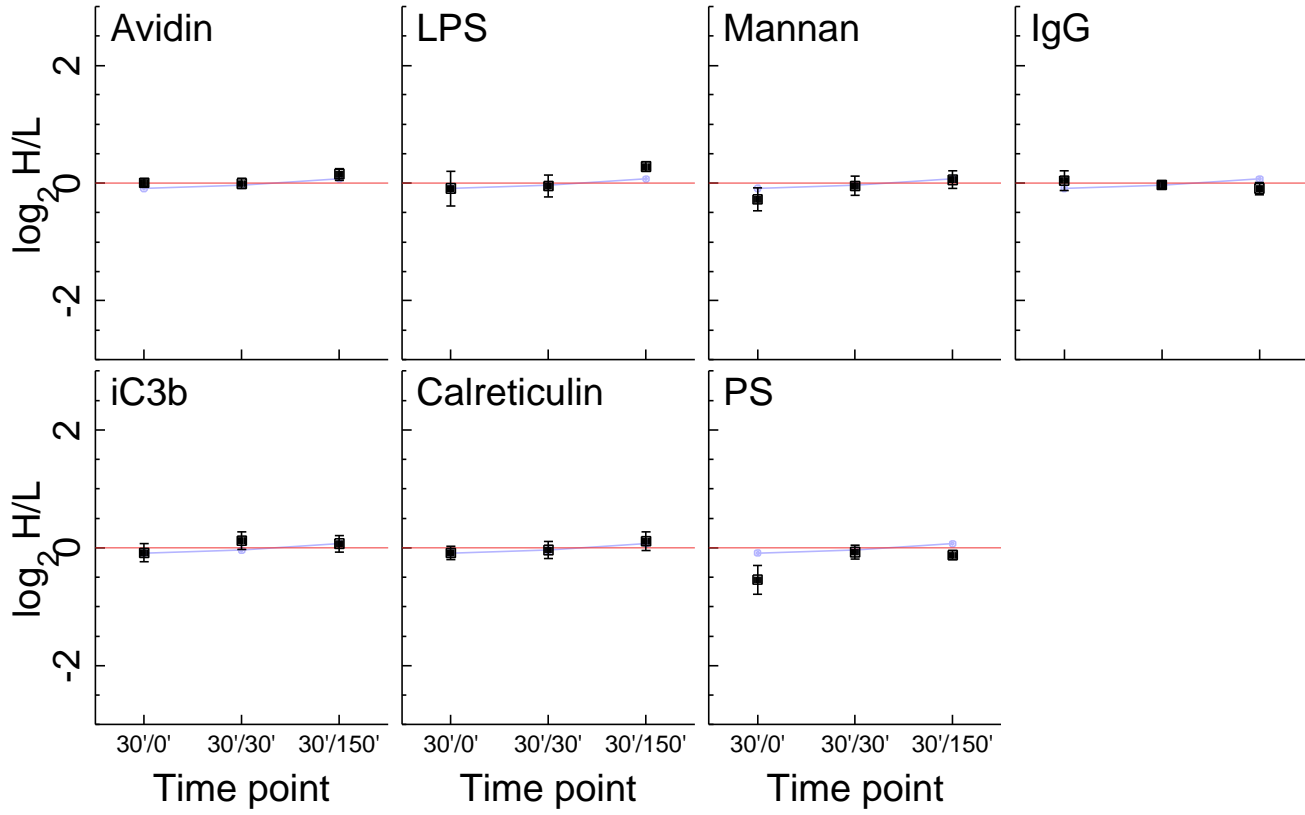

stx11 (Q3U5V8)

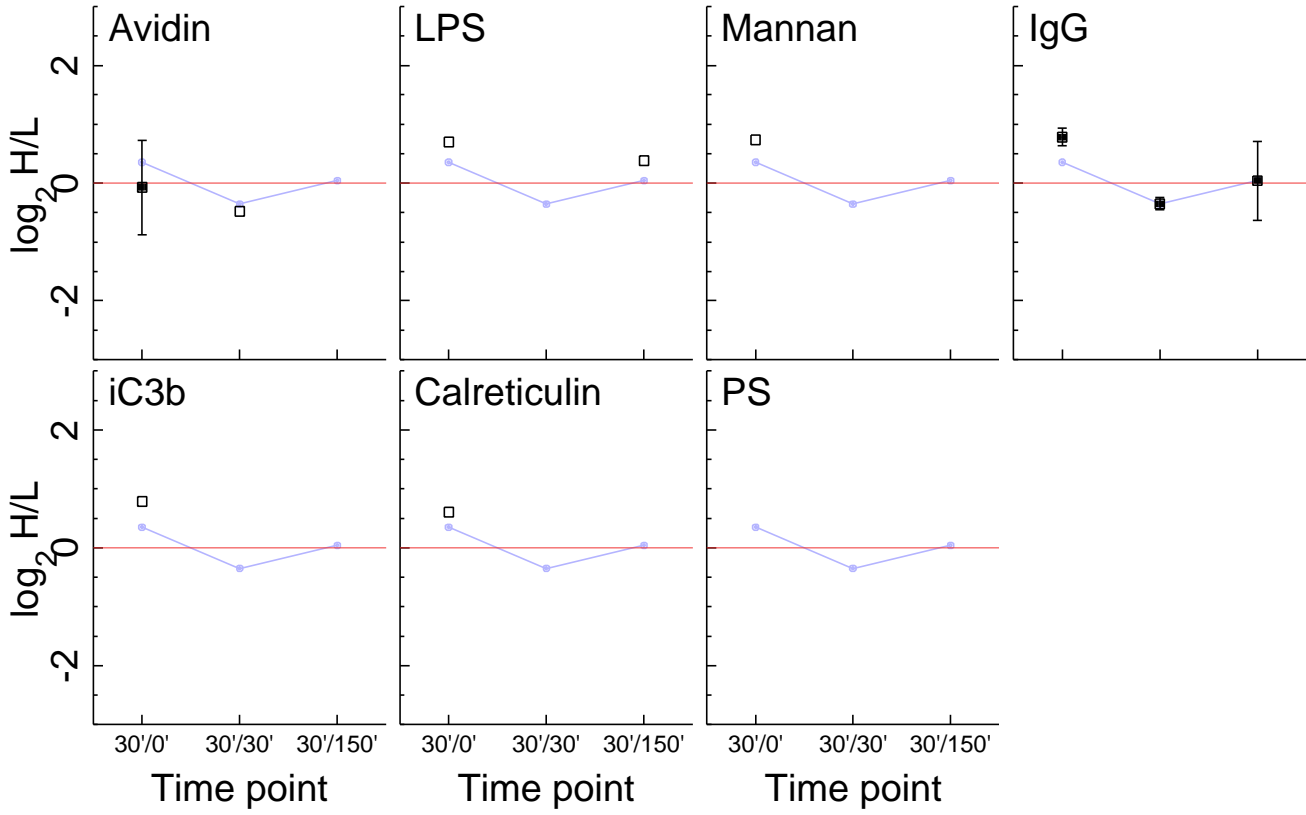

stx12 (Q9ER00)

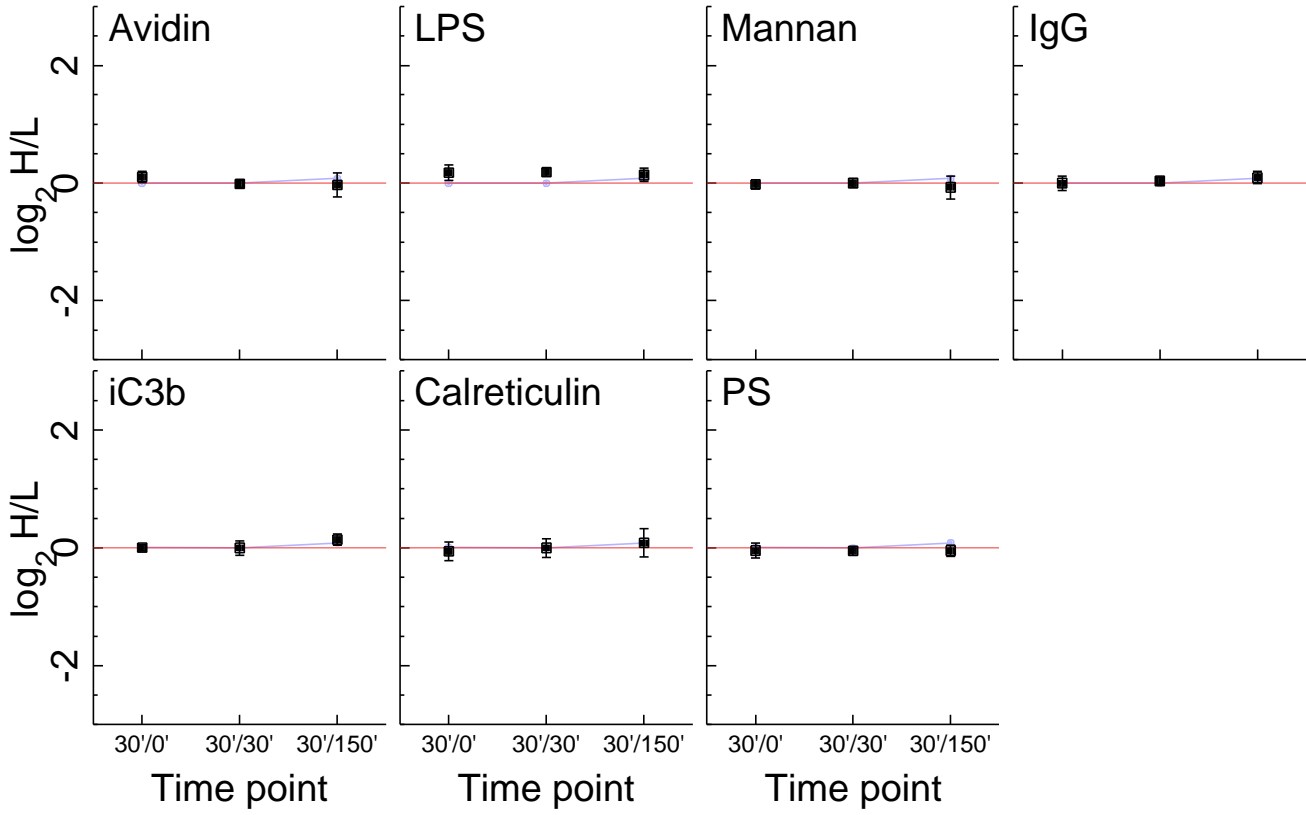



### stx16 (F6X4N5)

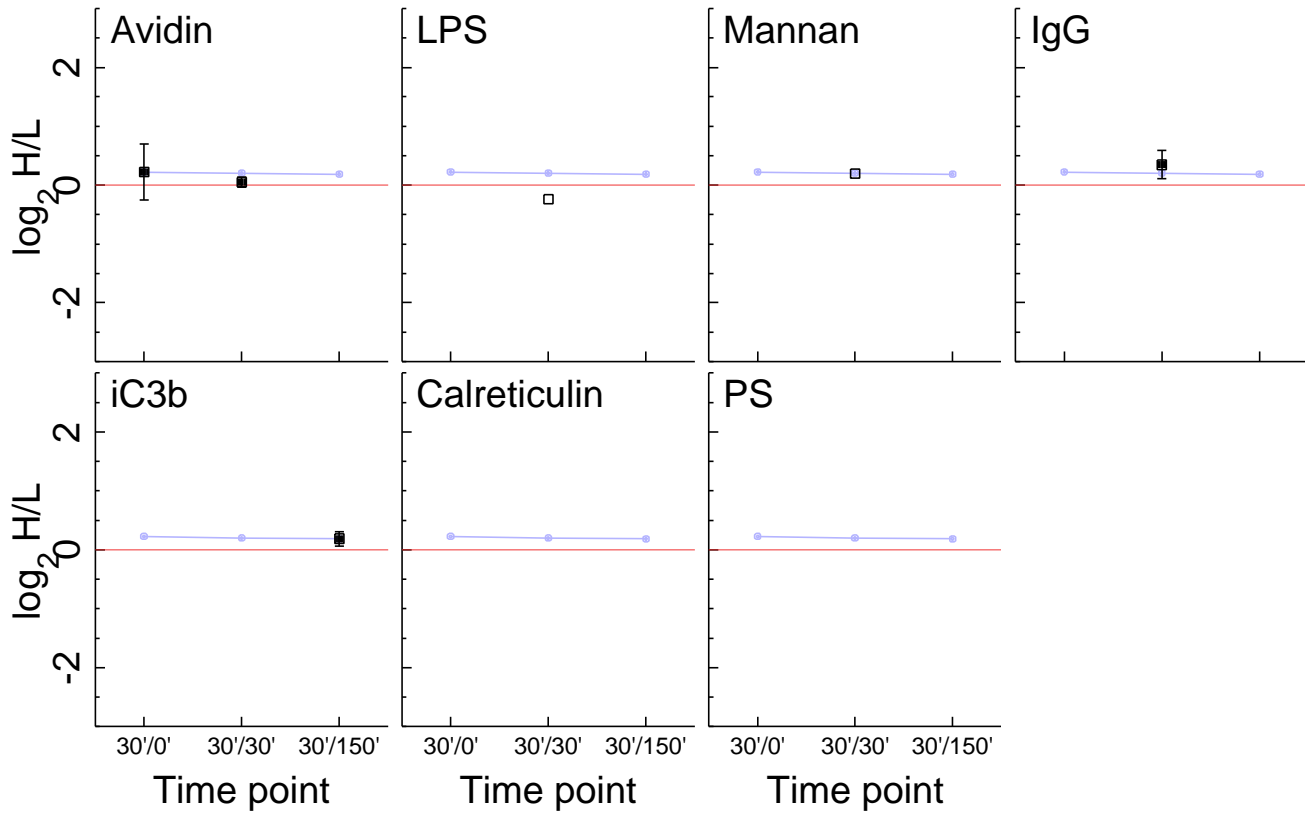

stx17 (Q9D0I4)

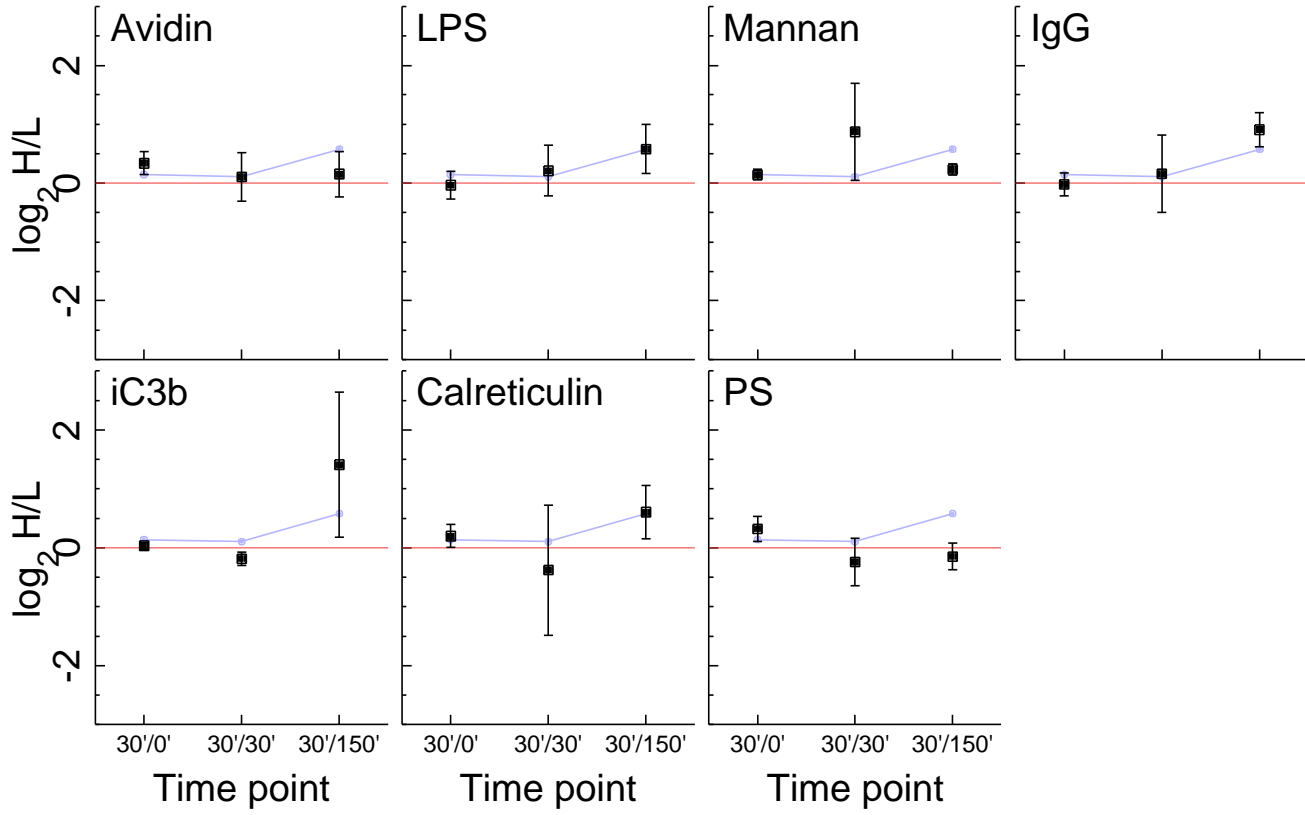

stx2 (Q80W45)

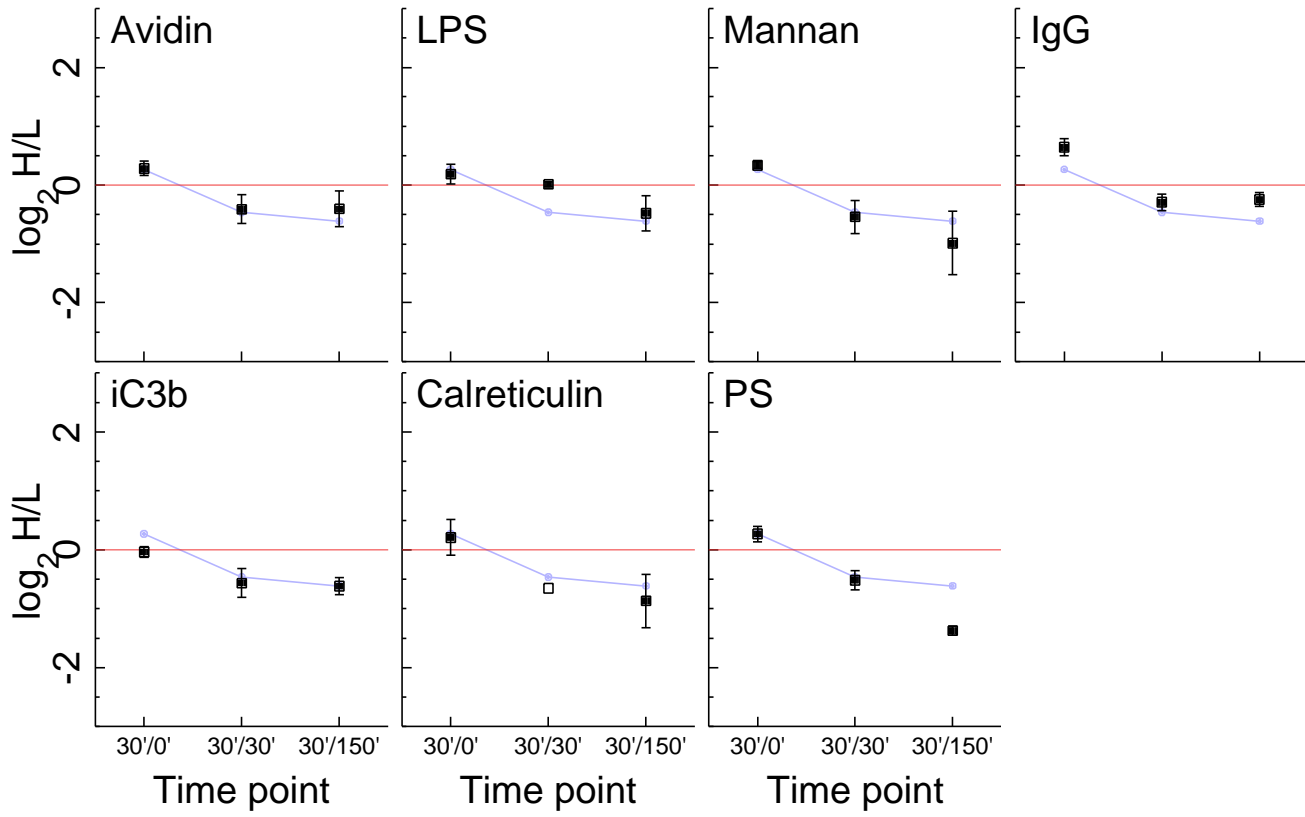

stx3 (Q64704)

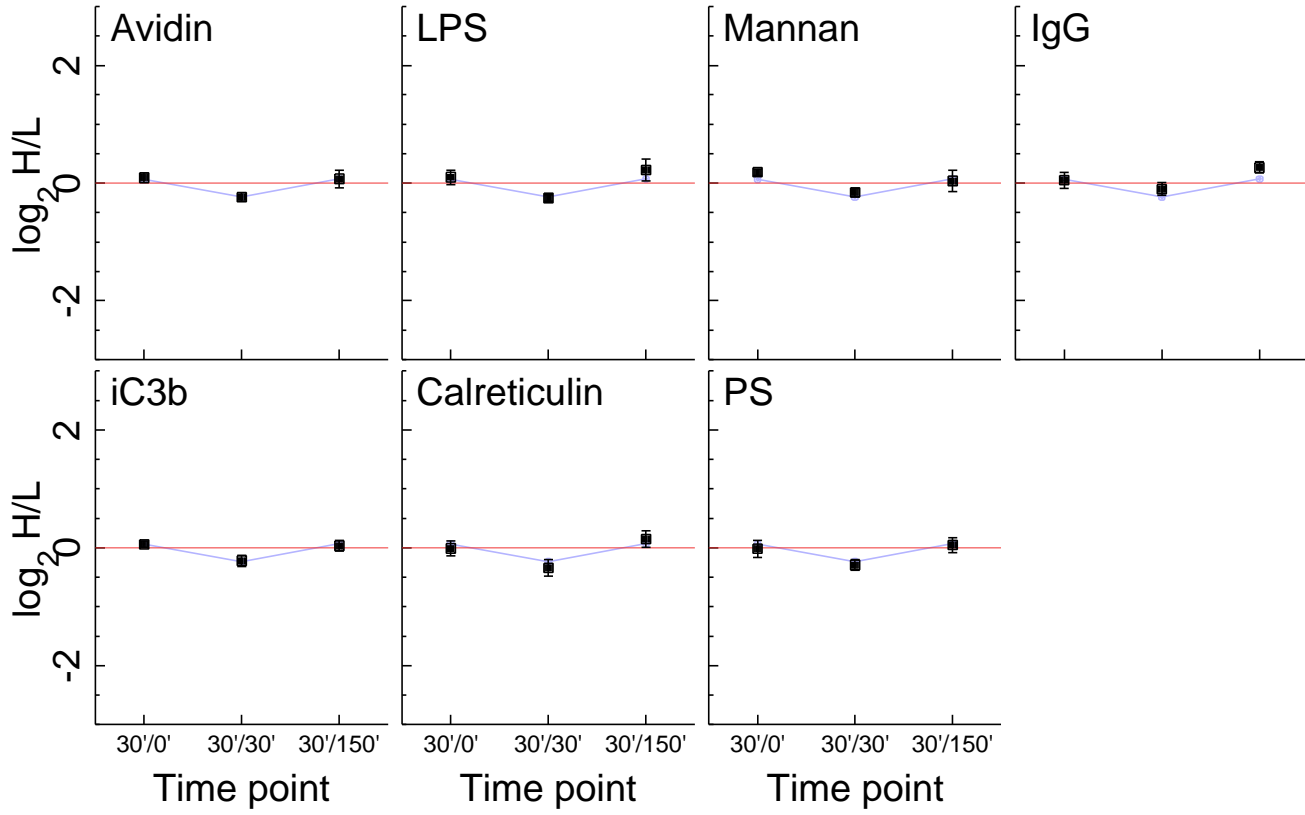

### stx4 (P70452)

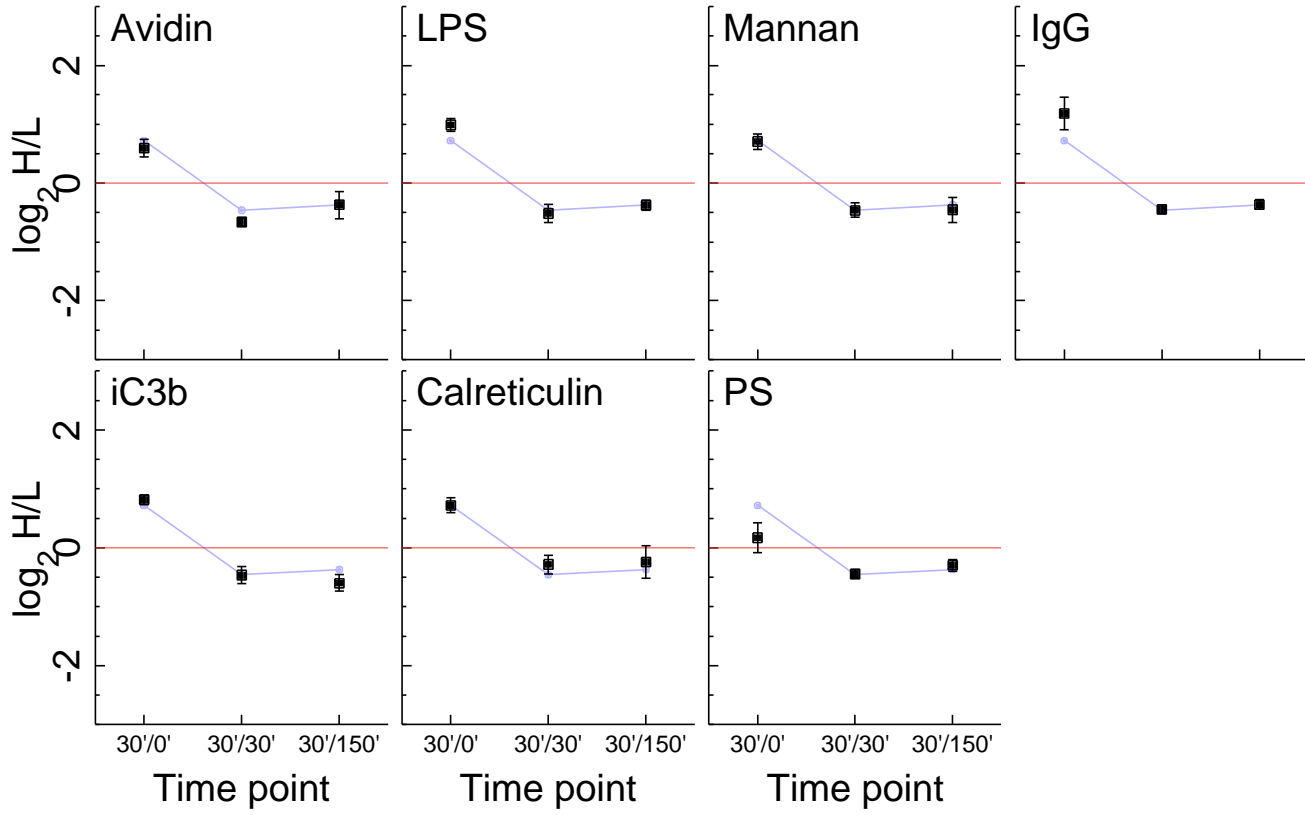

### stx5 (Q8K1E0)

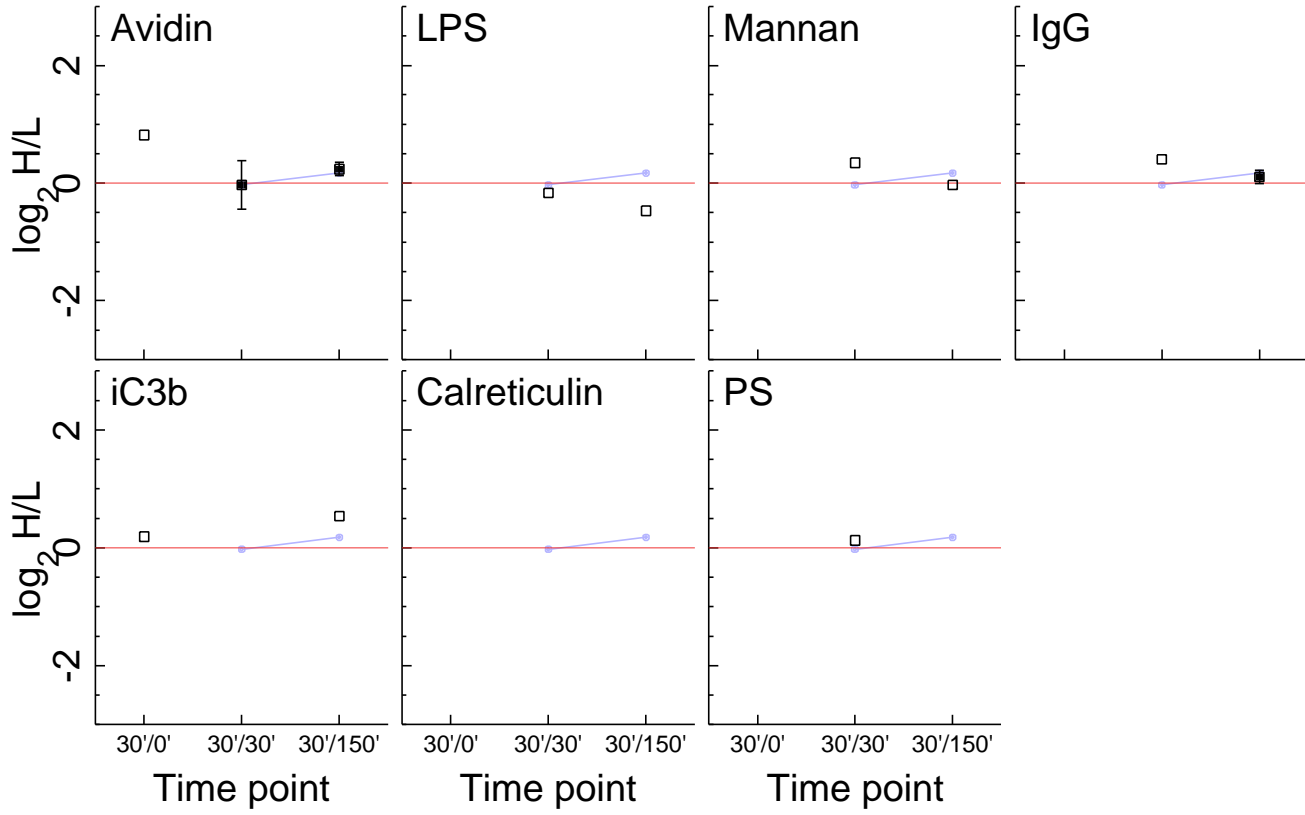

### stx6 (Q9JKK1)

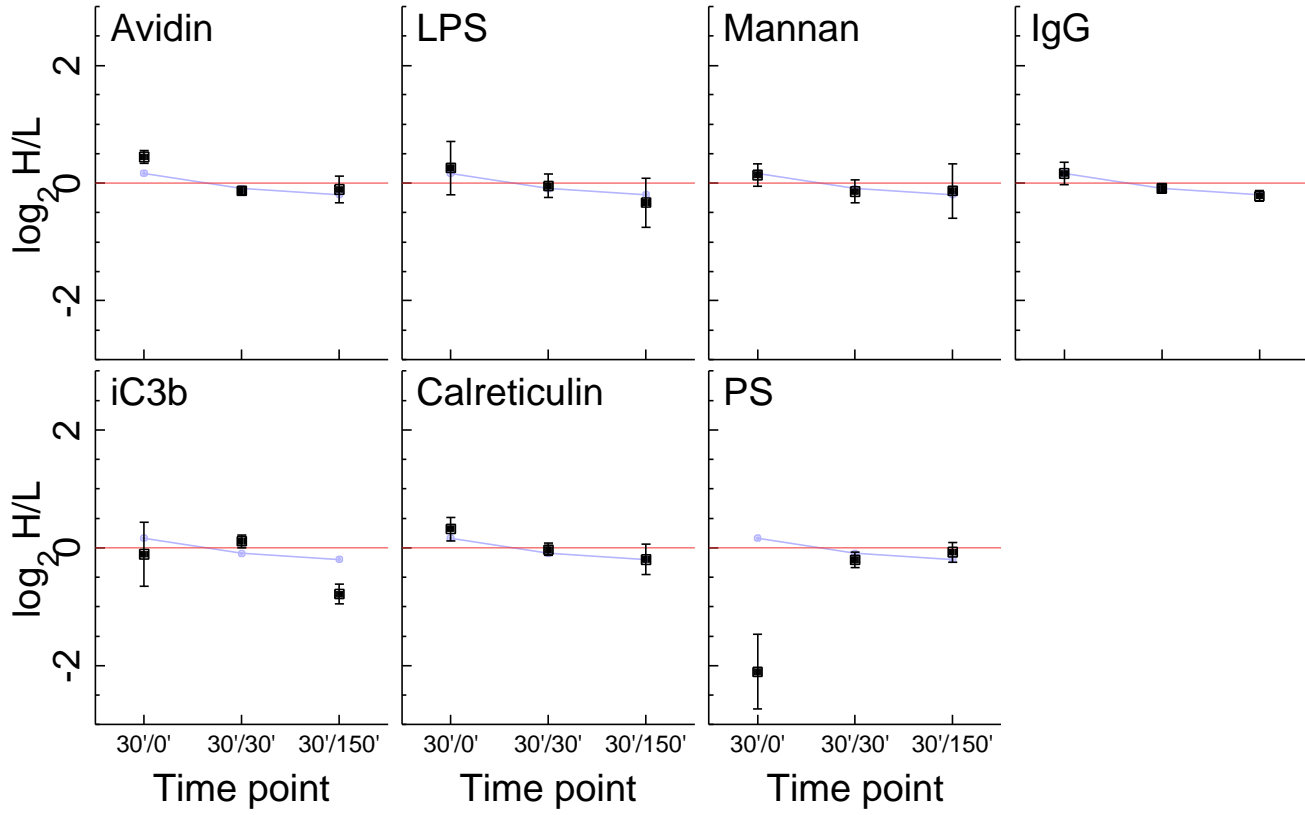

### stx7 (O70439)

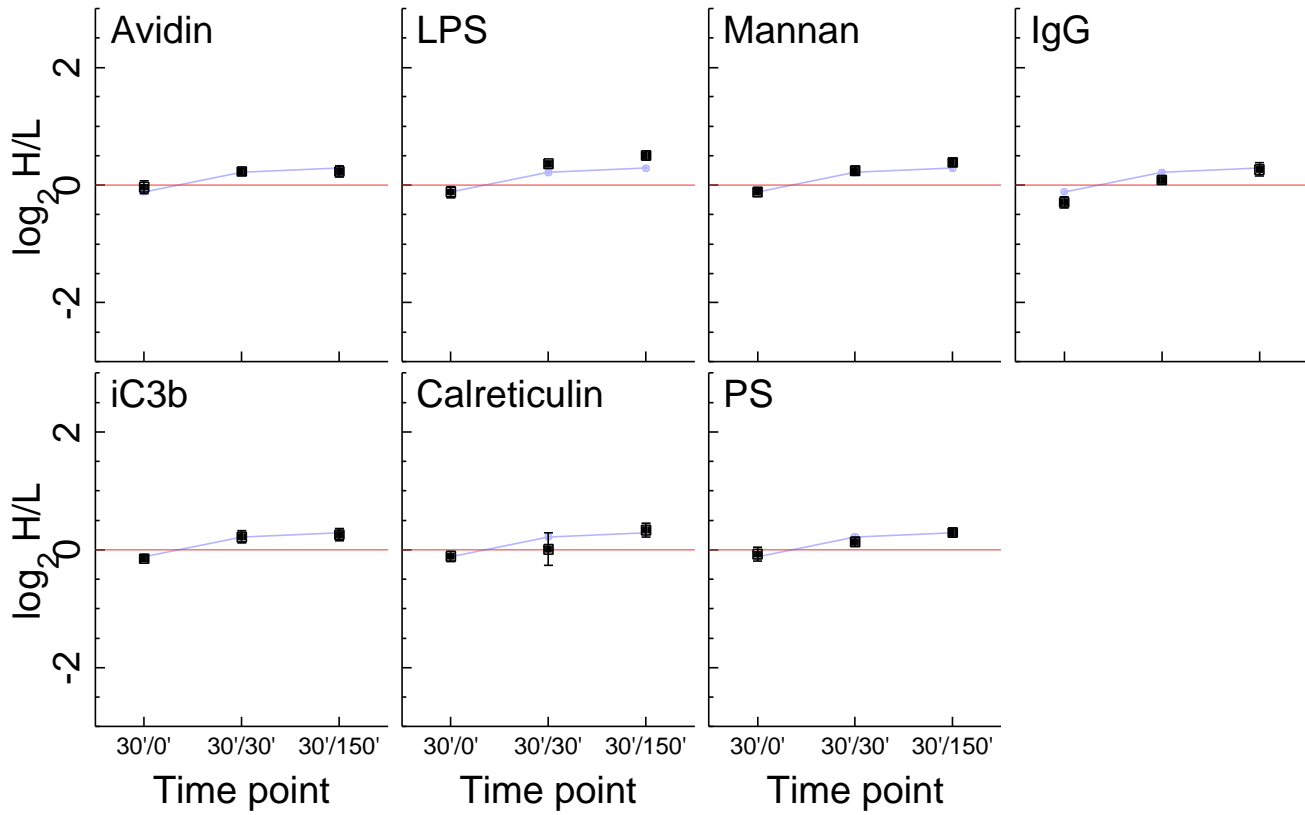



stx8 (O88983)

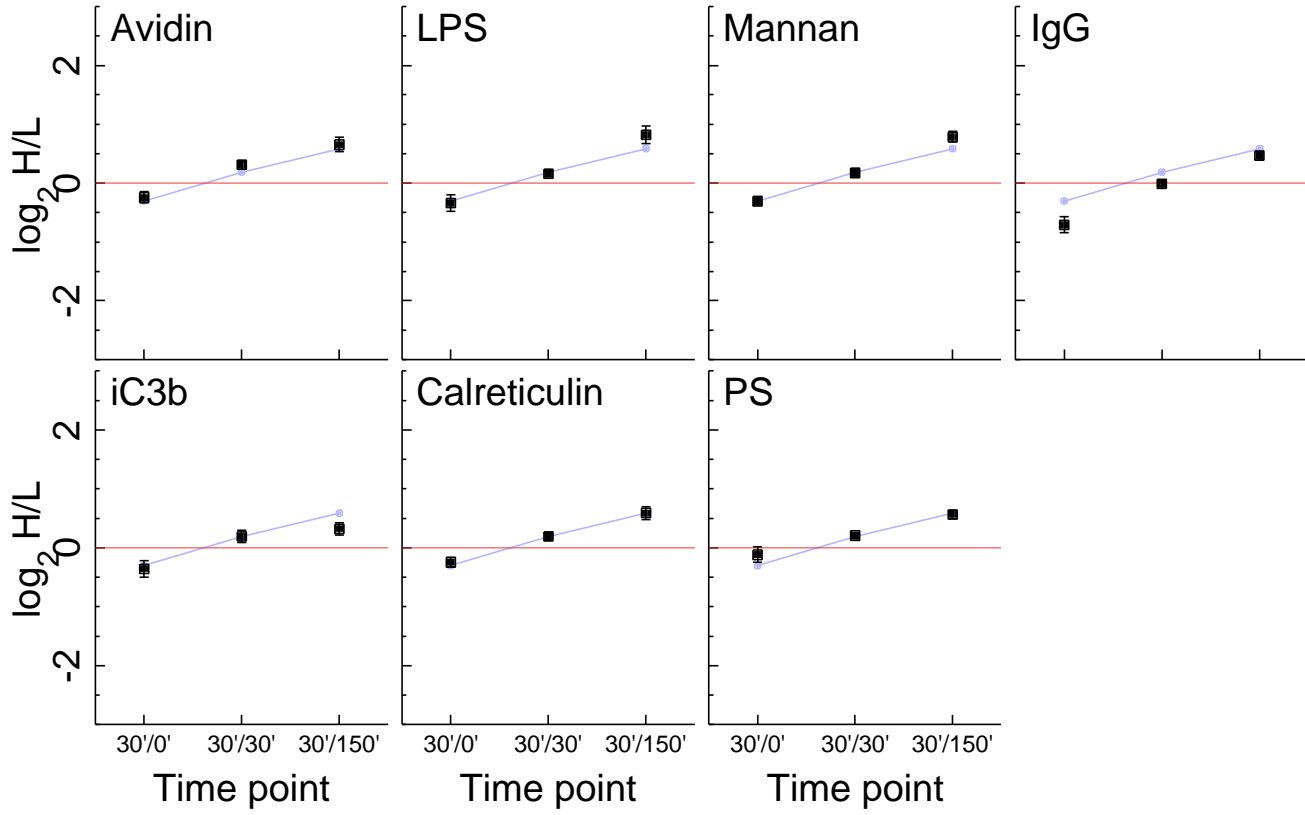

### stxbp1 (O08599)

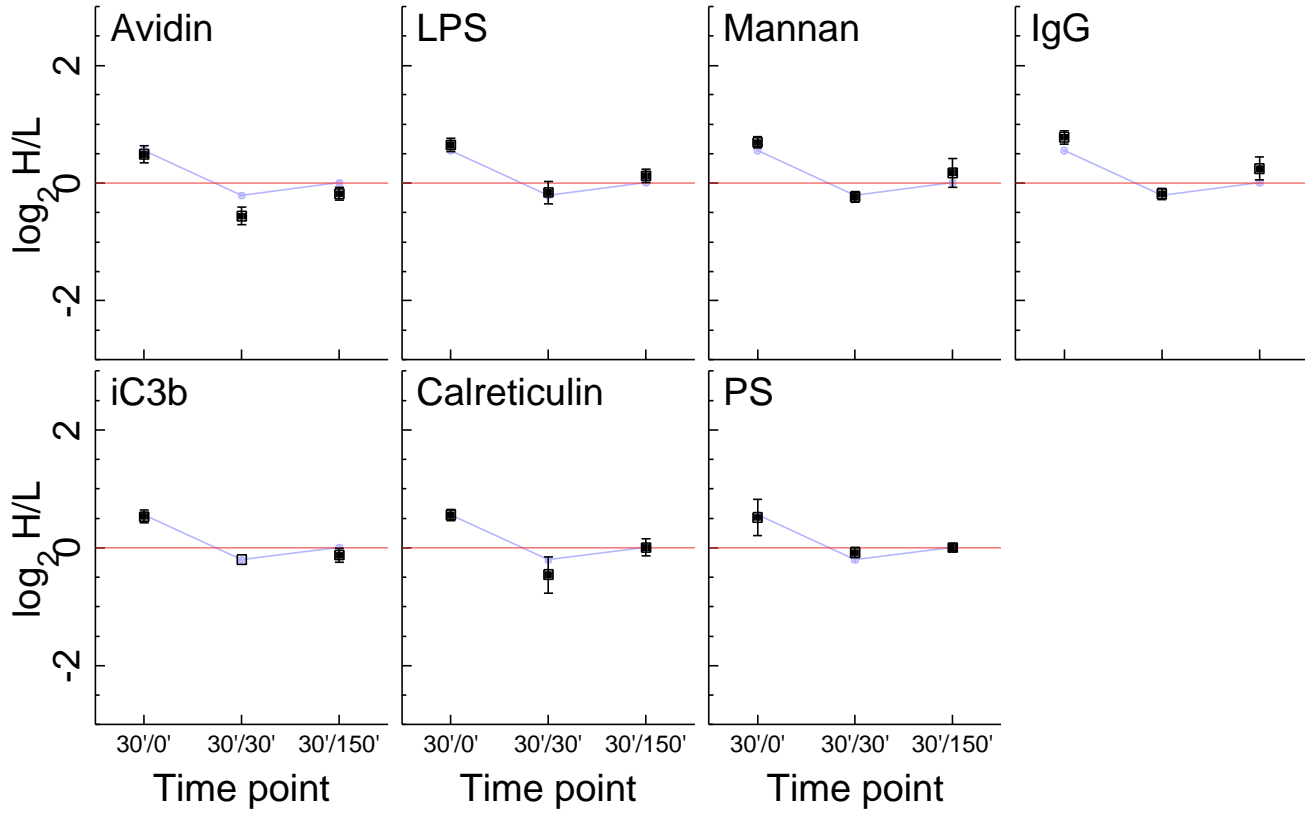

stxbp2 (Q64324)

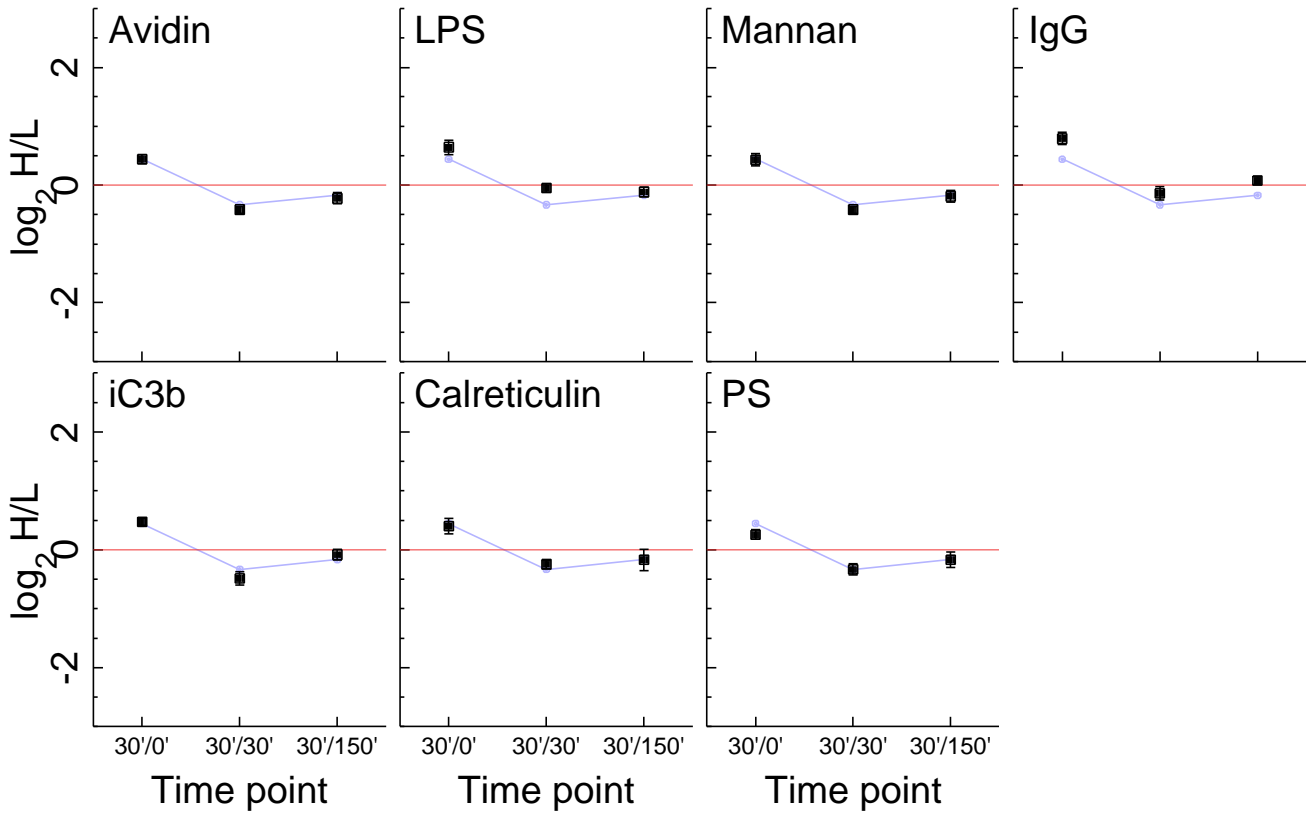

### stxbp3 (Q60770)

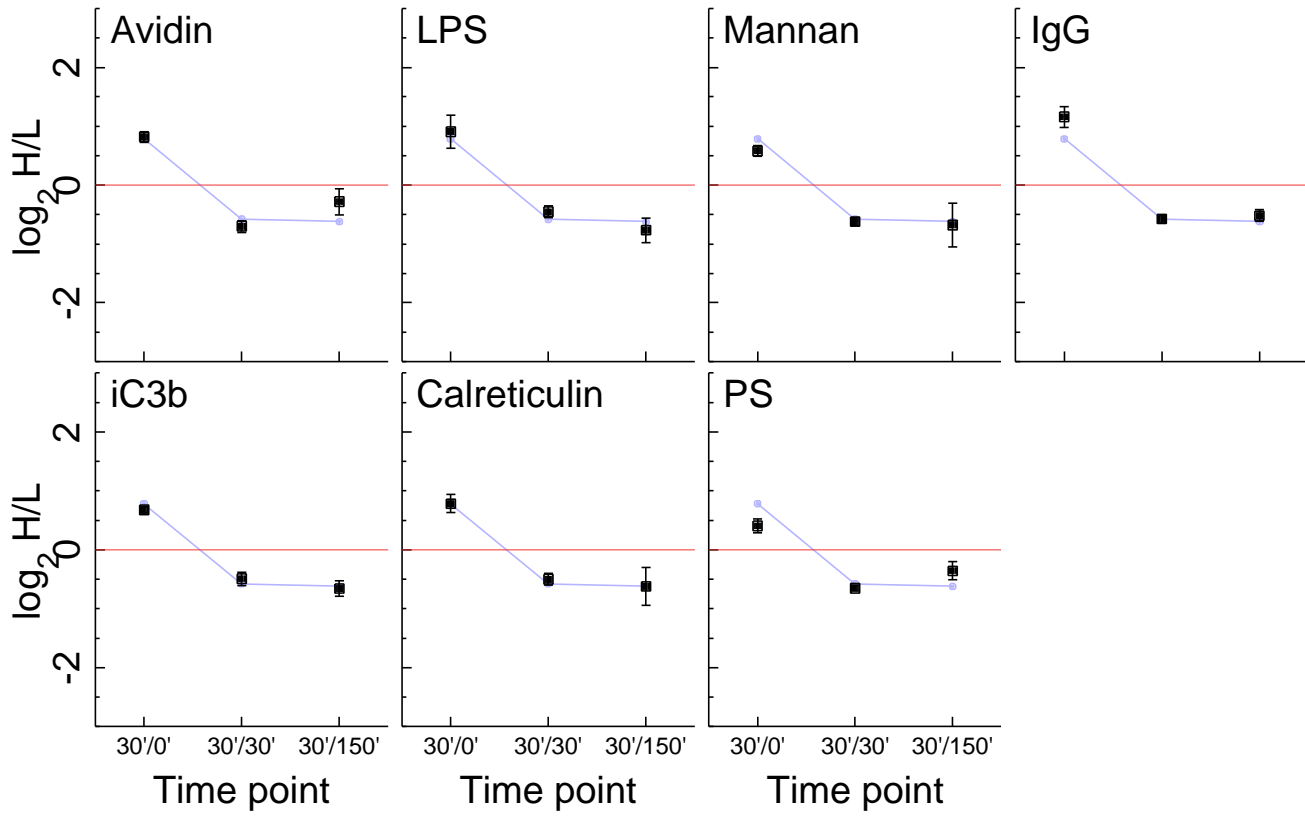

stxbp5 (Q8K400)

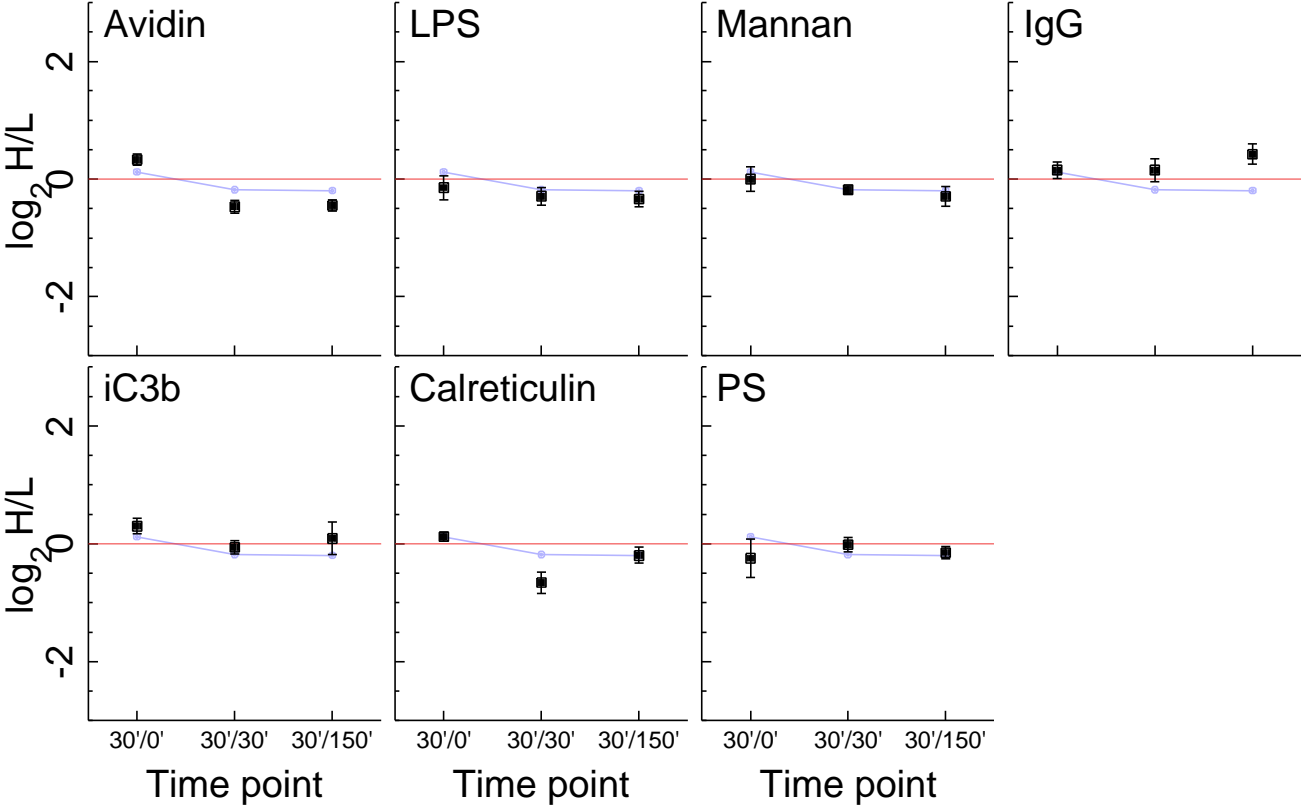

sub1 (P11031)

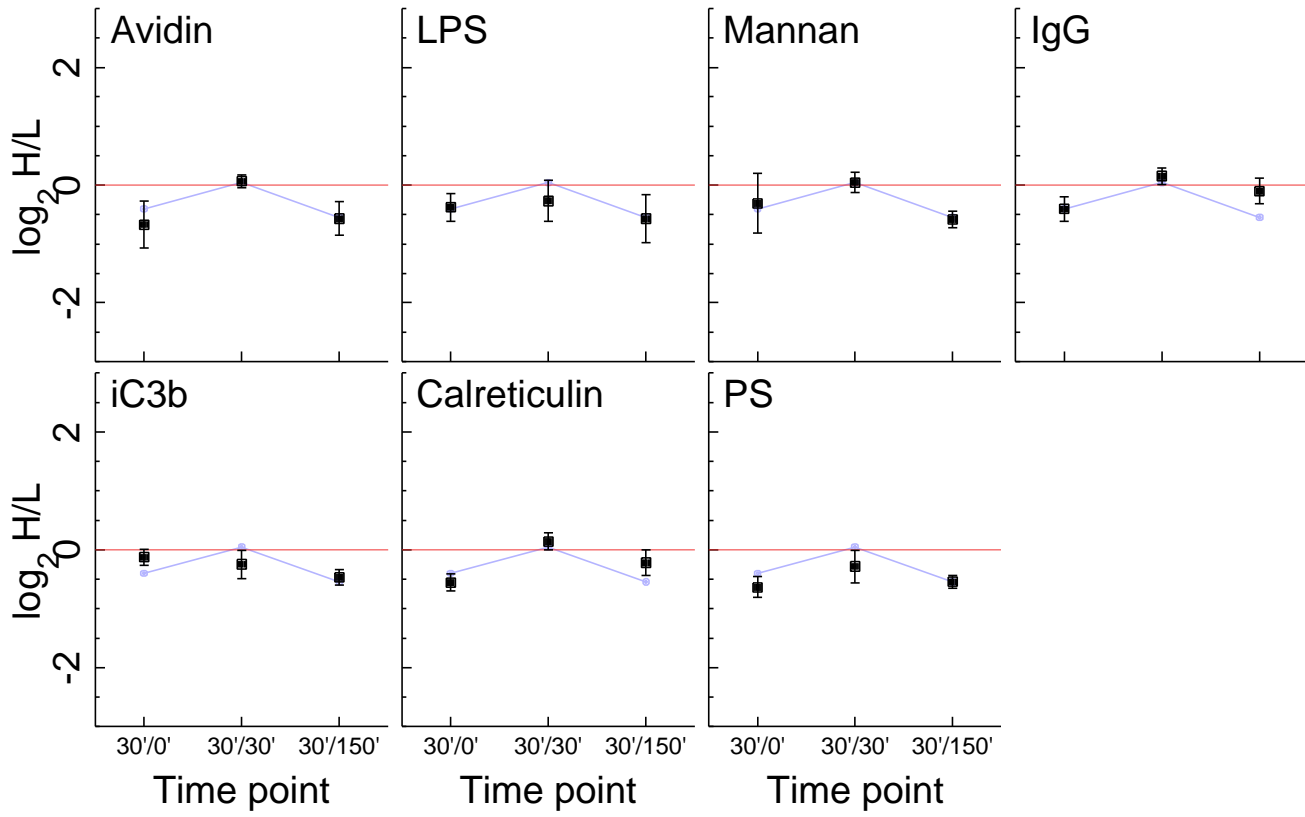

sucla2 (Q9Z2I9)

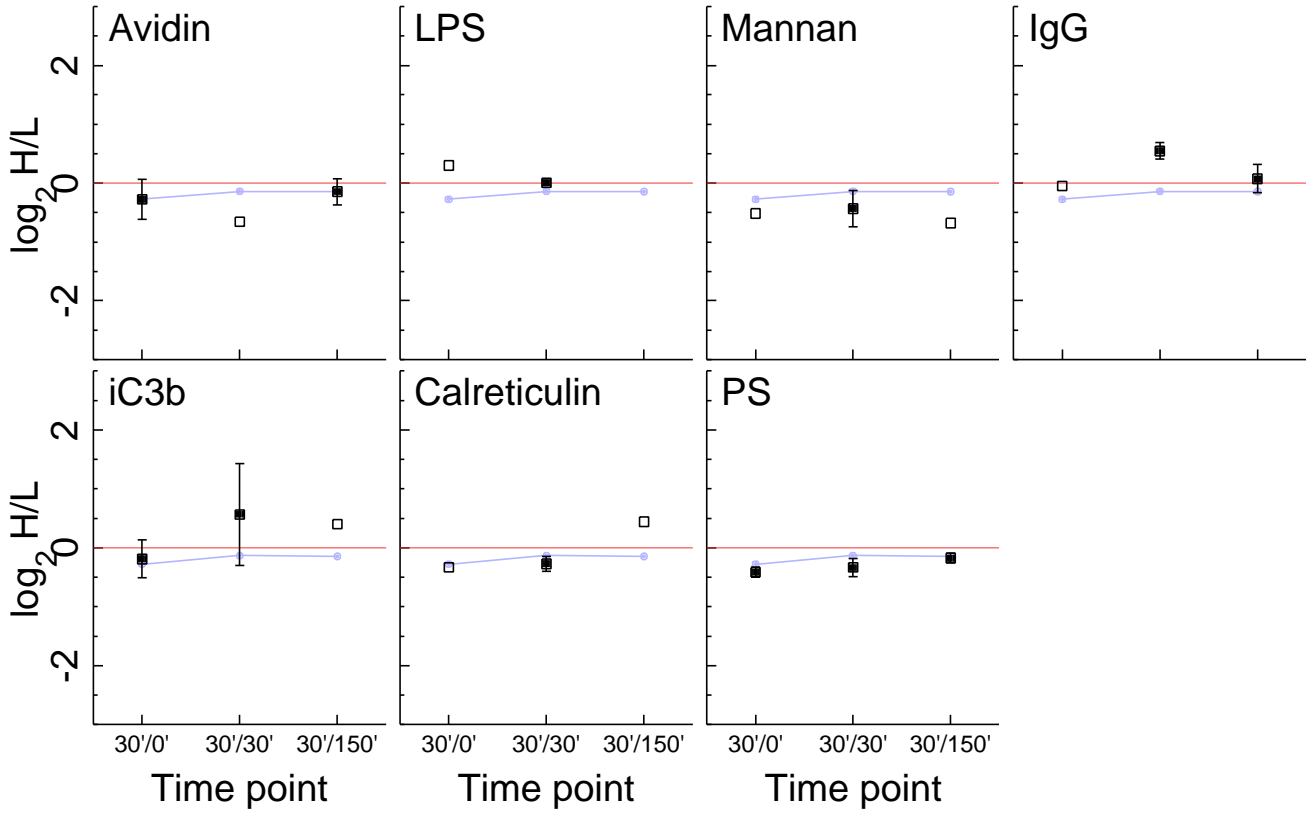

### suc1g1 (Q9WUM5)

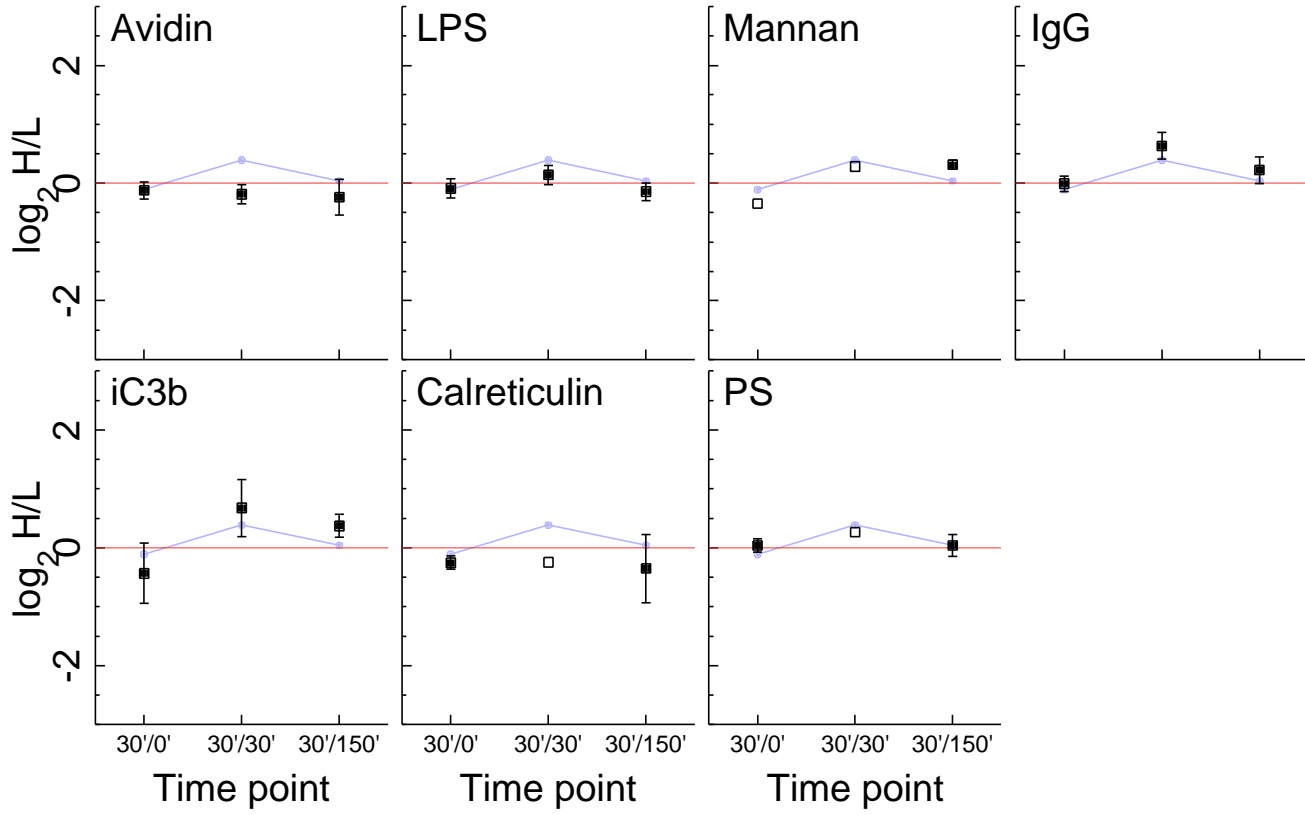



sugp1 (Q8CH02)

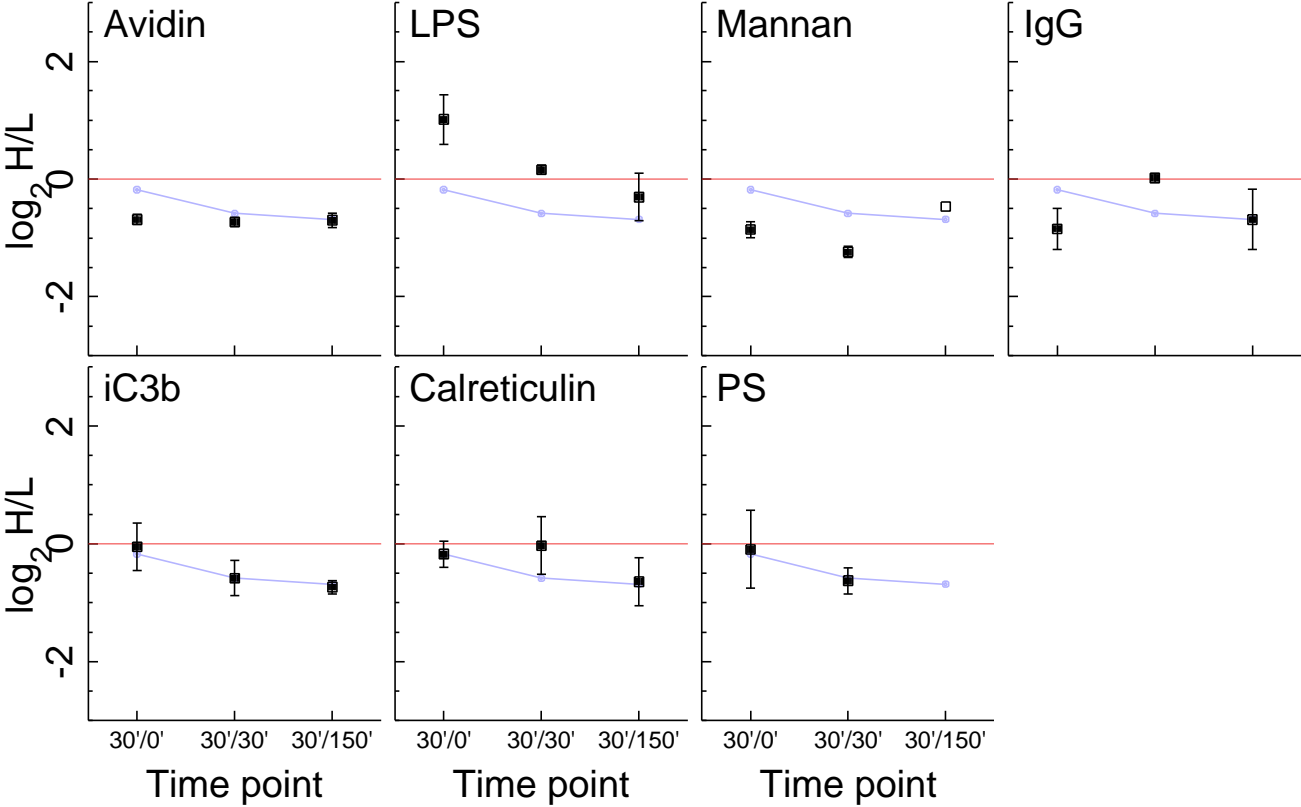

### sumo2 (P61957)

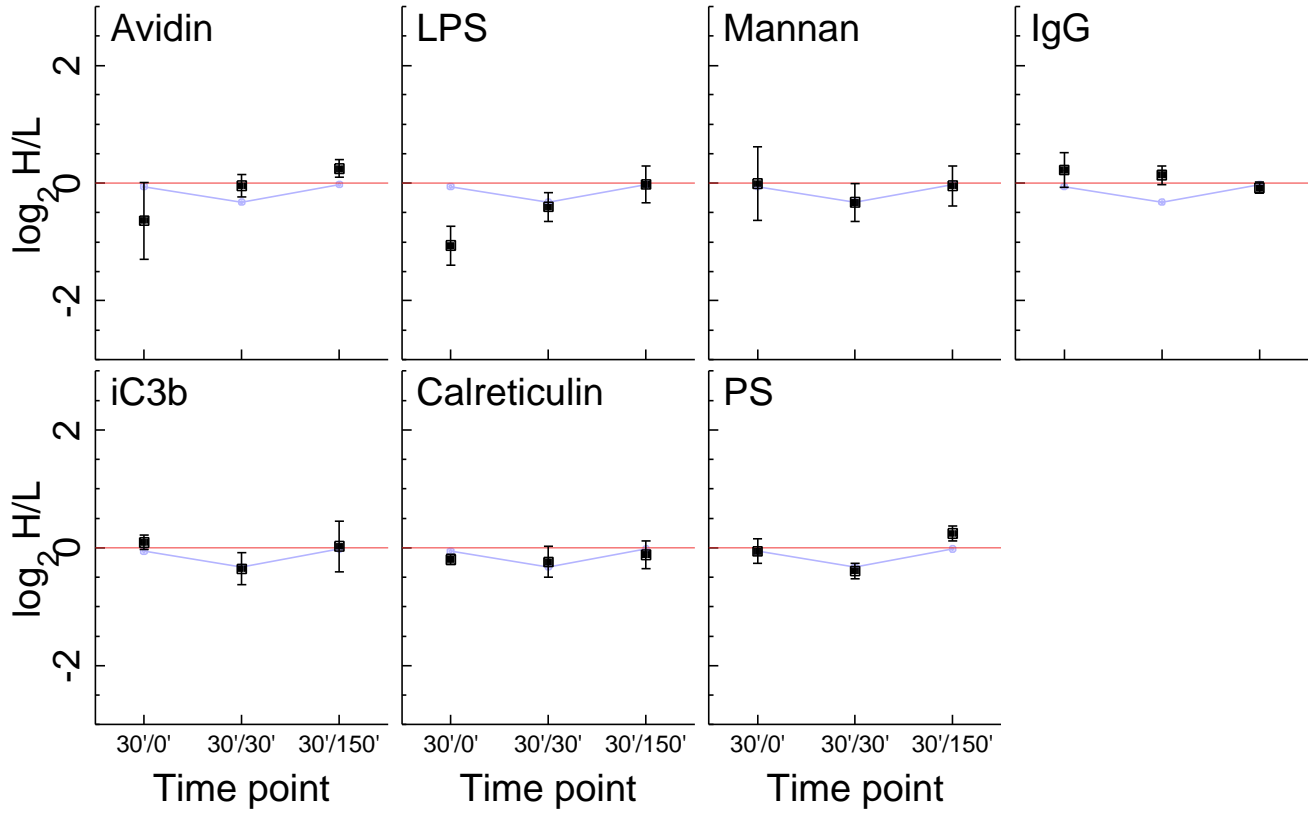

sun2 (Q8BJS4)

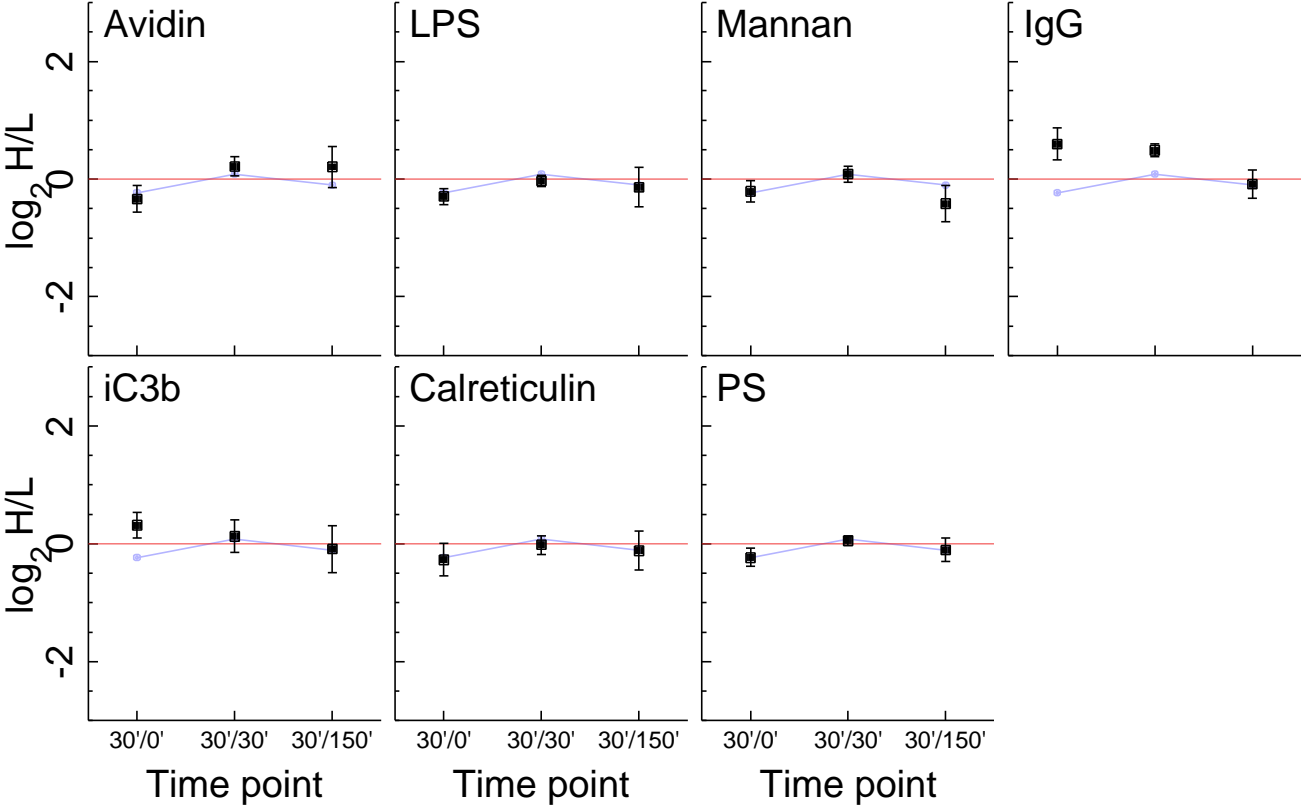

### surf4 (Q64310)

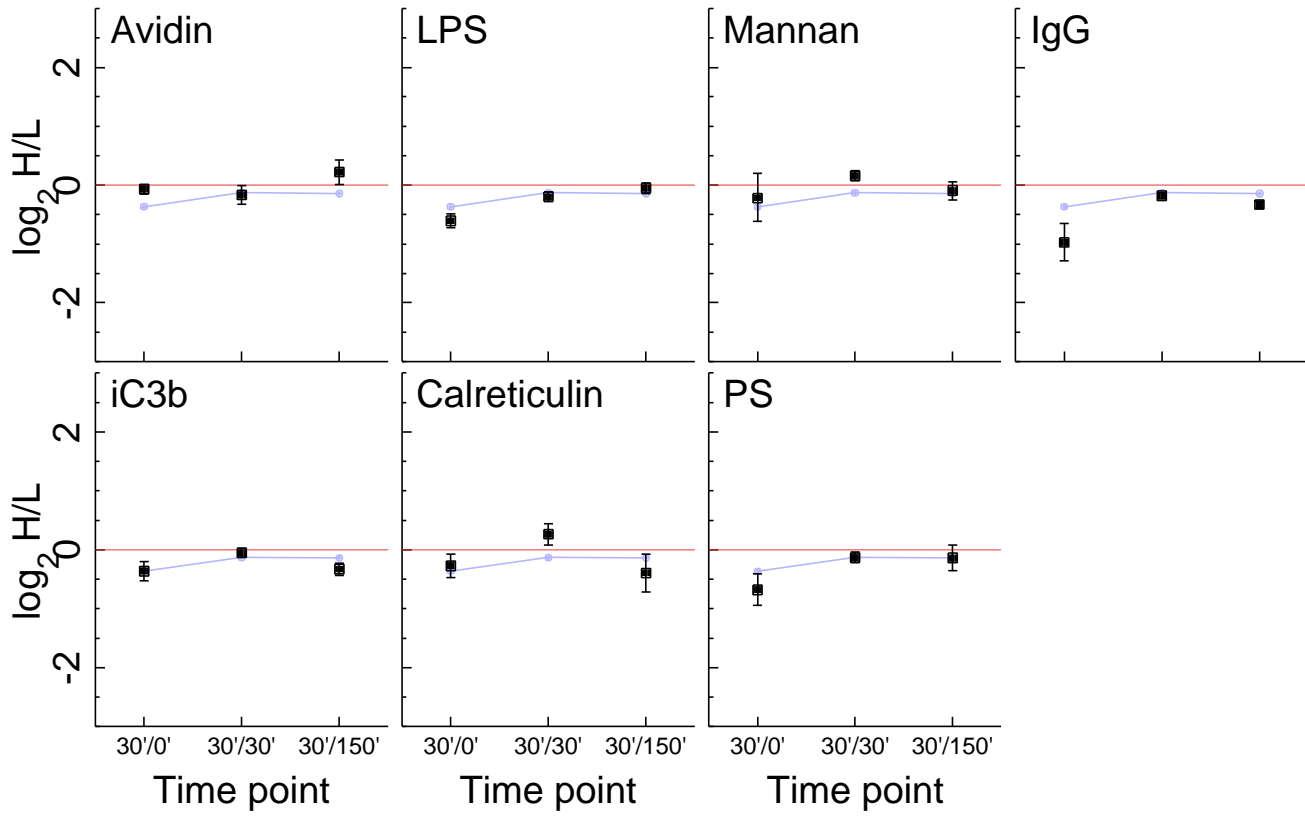

### swap70 (Q6A028)

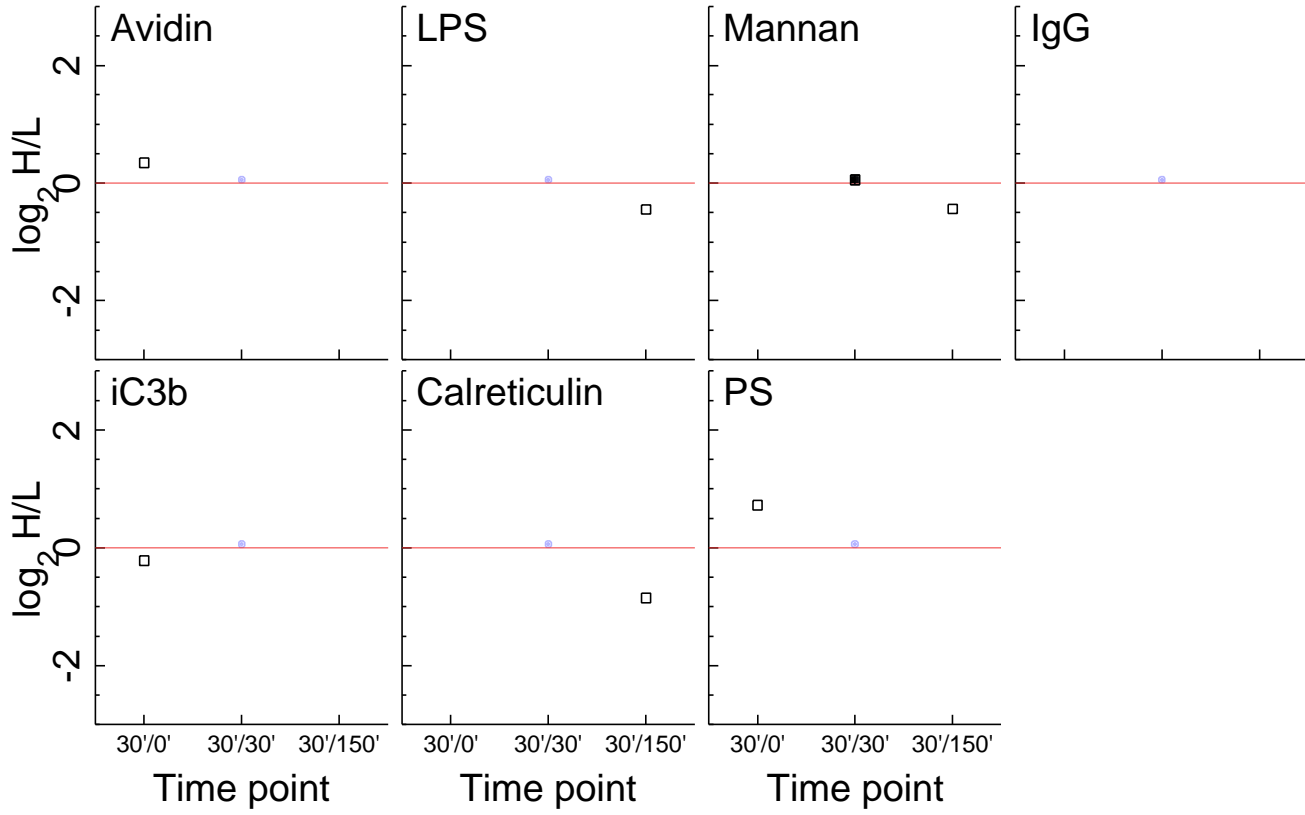

syk (P48025)

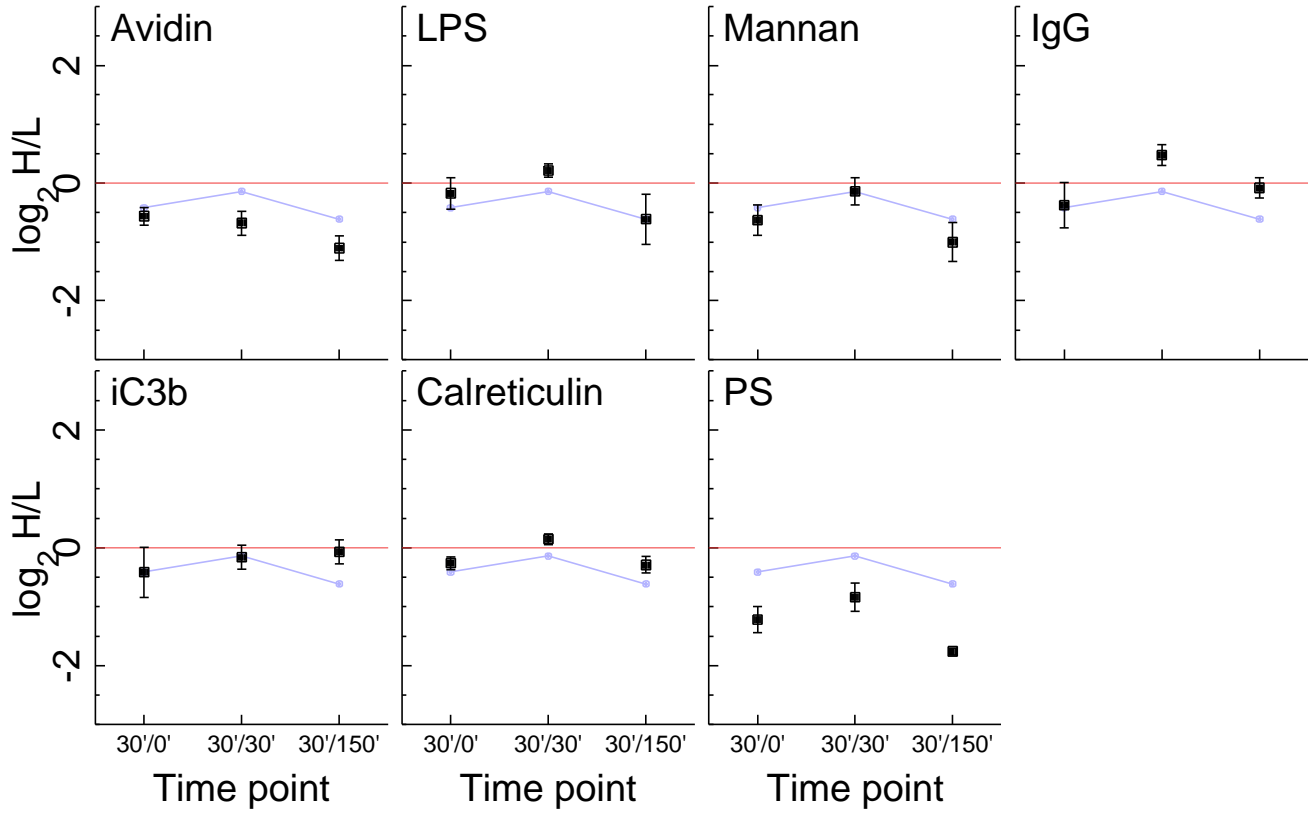

### syncrip (Q7TMK9)

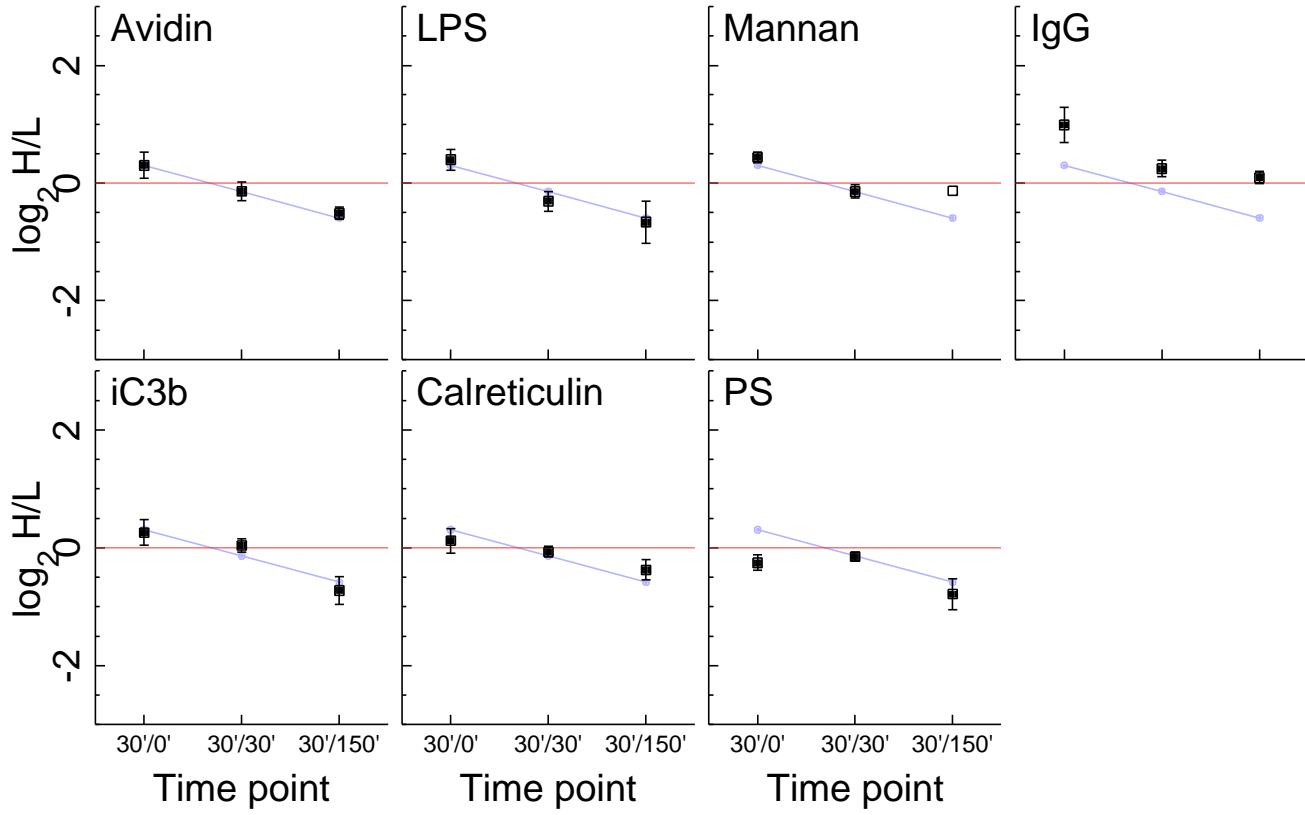

syng1 (O55100)

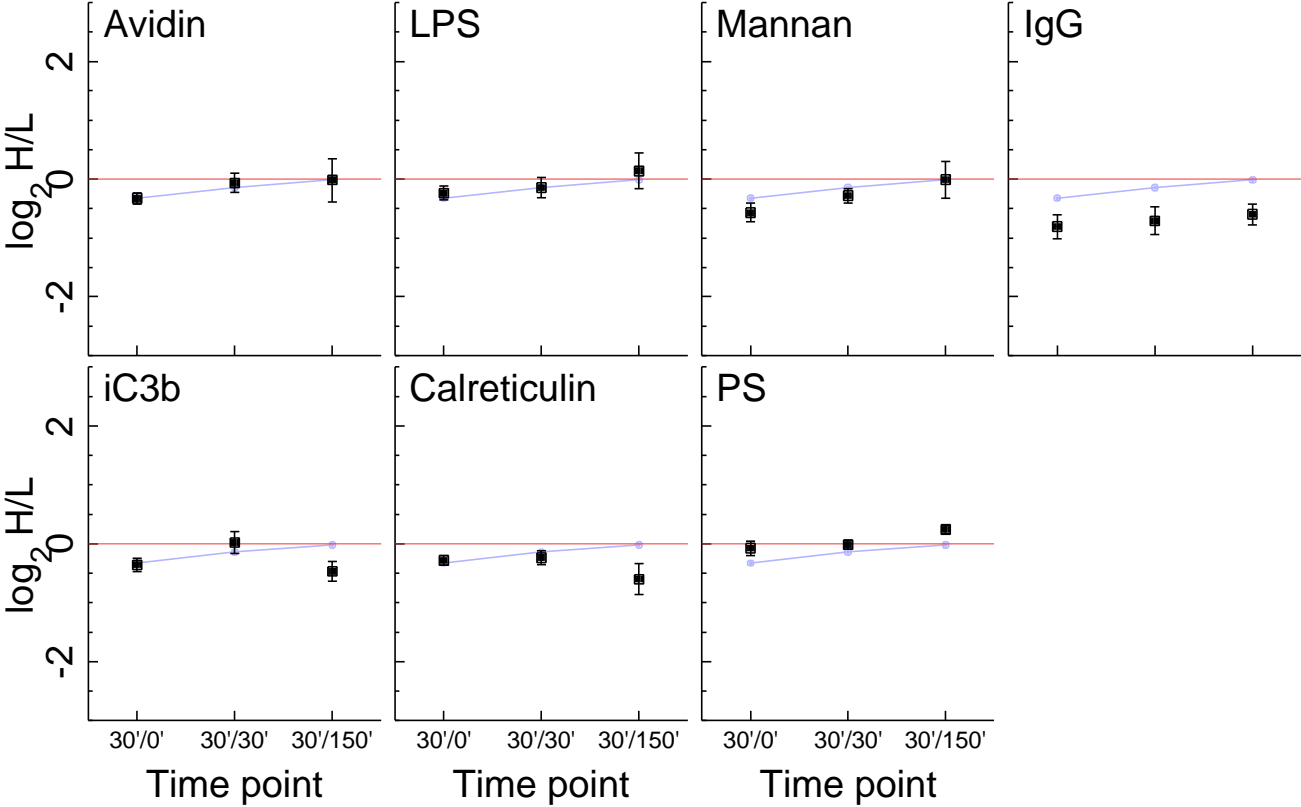



syngn2 (O55101)

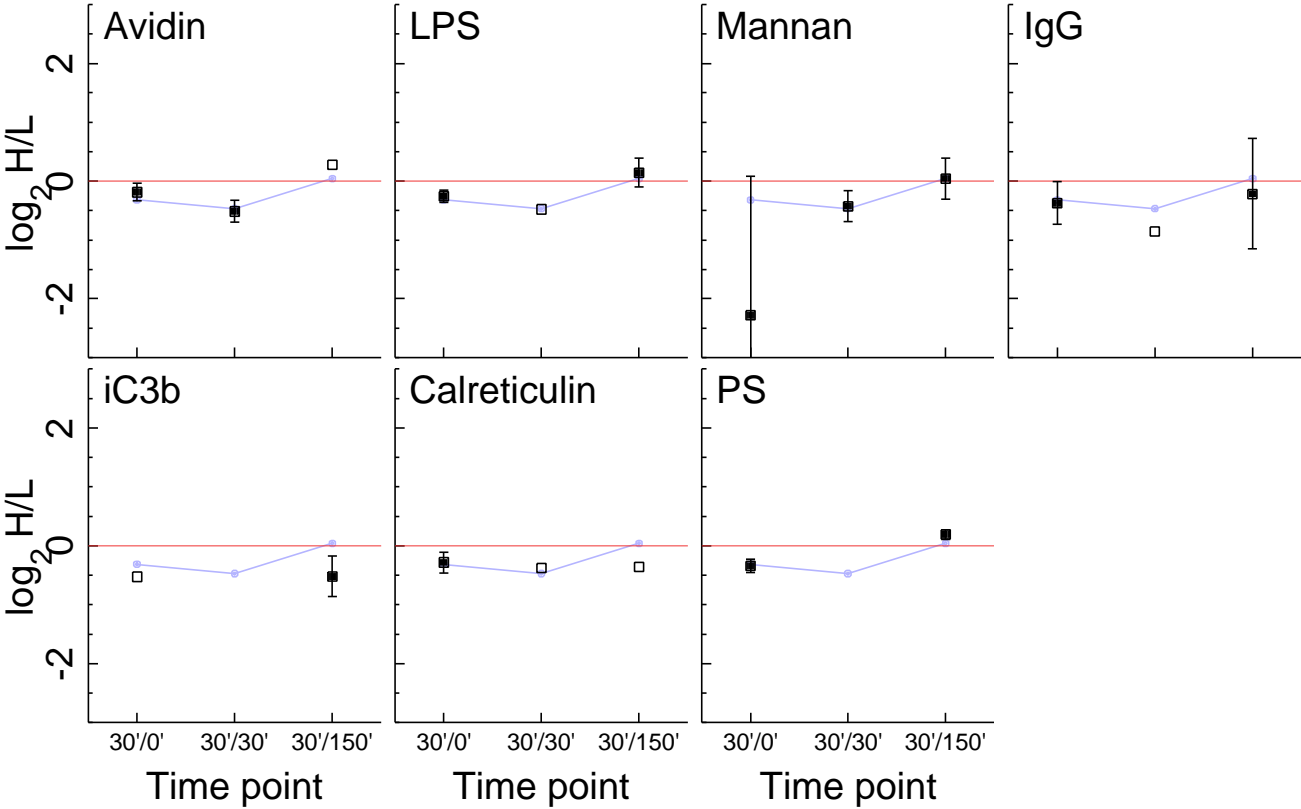

synrg (Q5SV85)

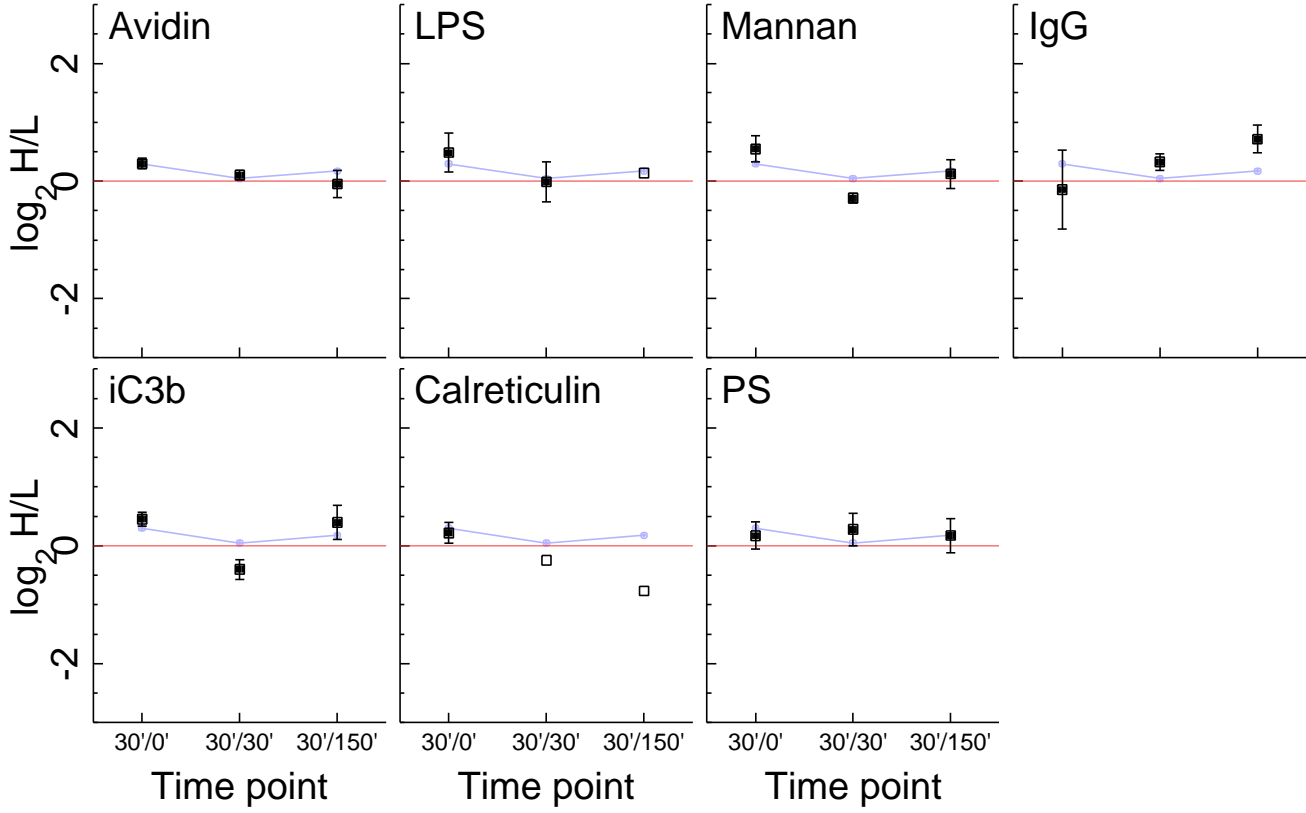

### syp1 (O09117)

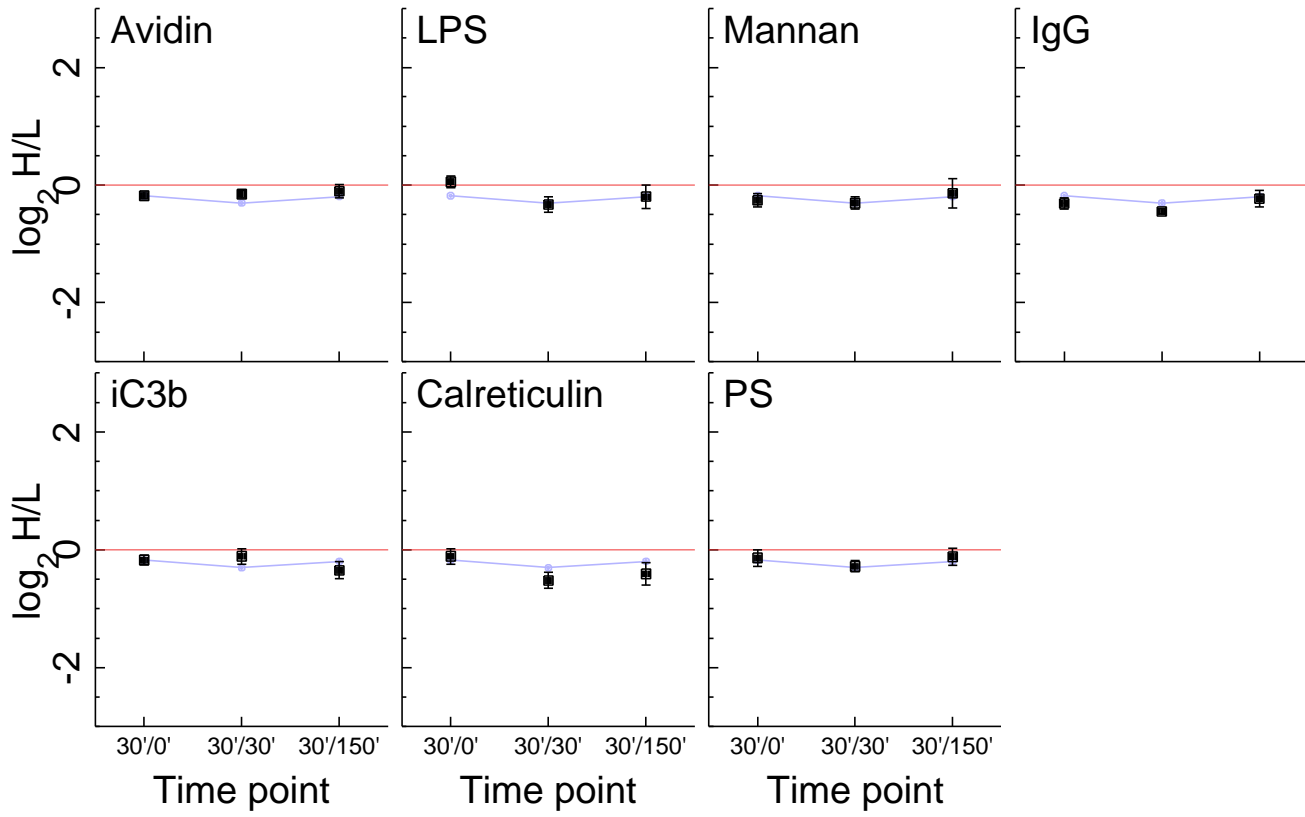

# tagln2 (Q9WVA4)

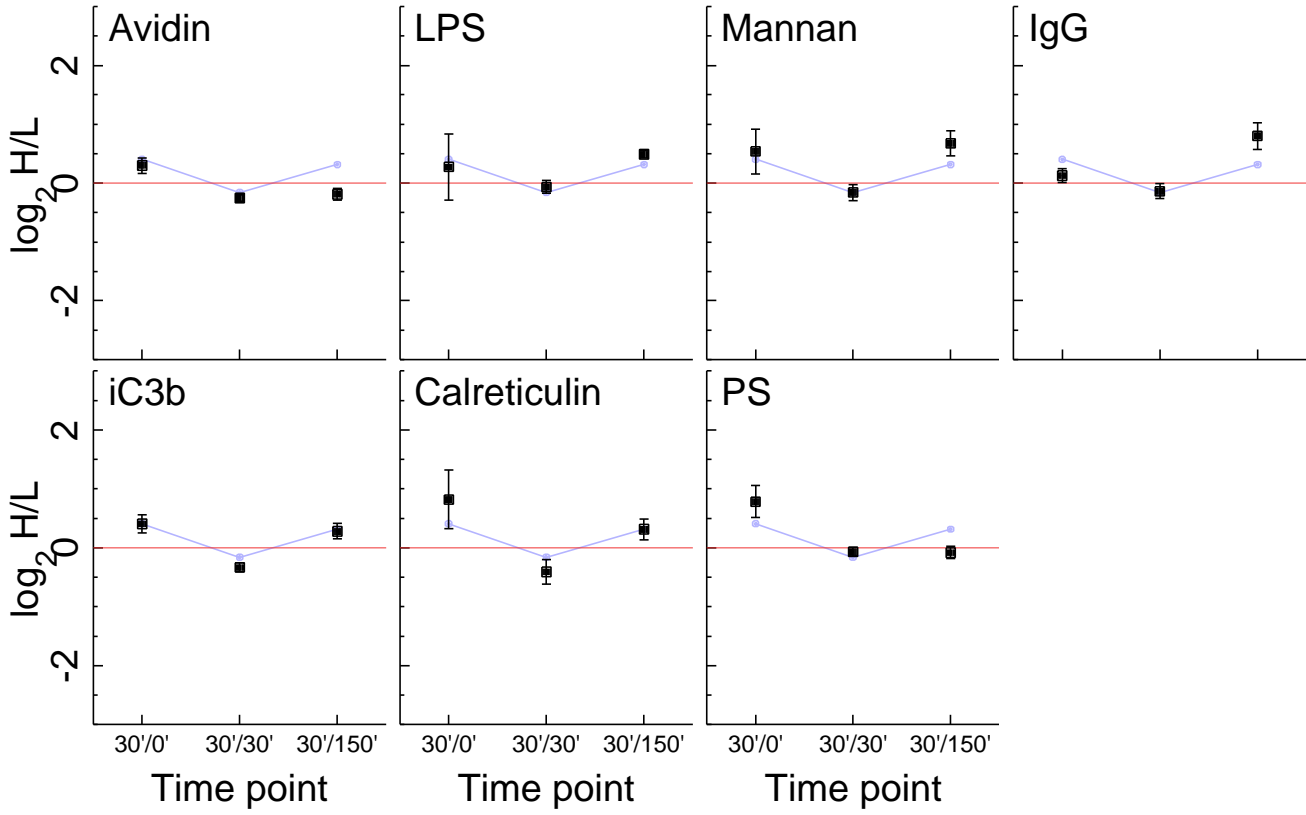

### taok3 (Q8BYC6)

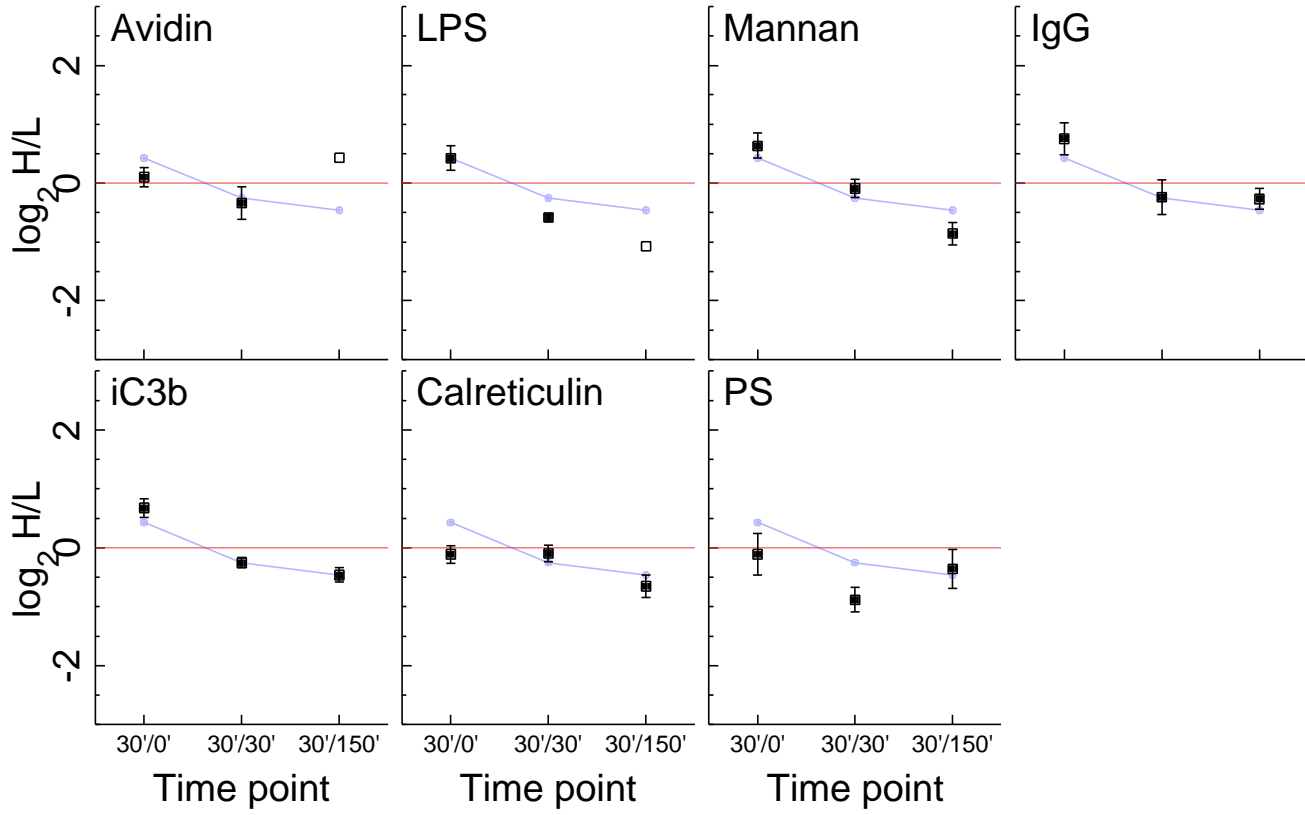

### tap1 (P21958)

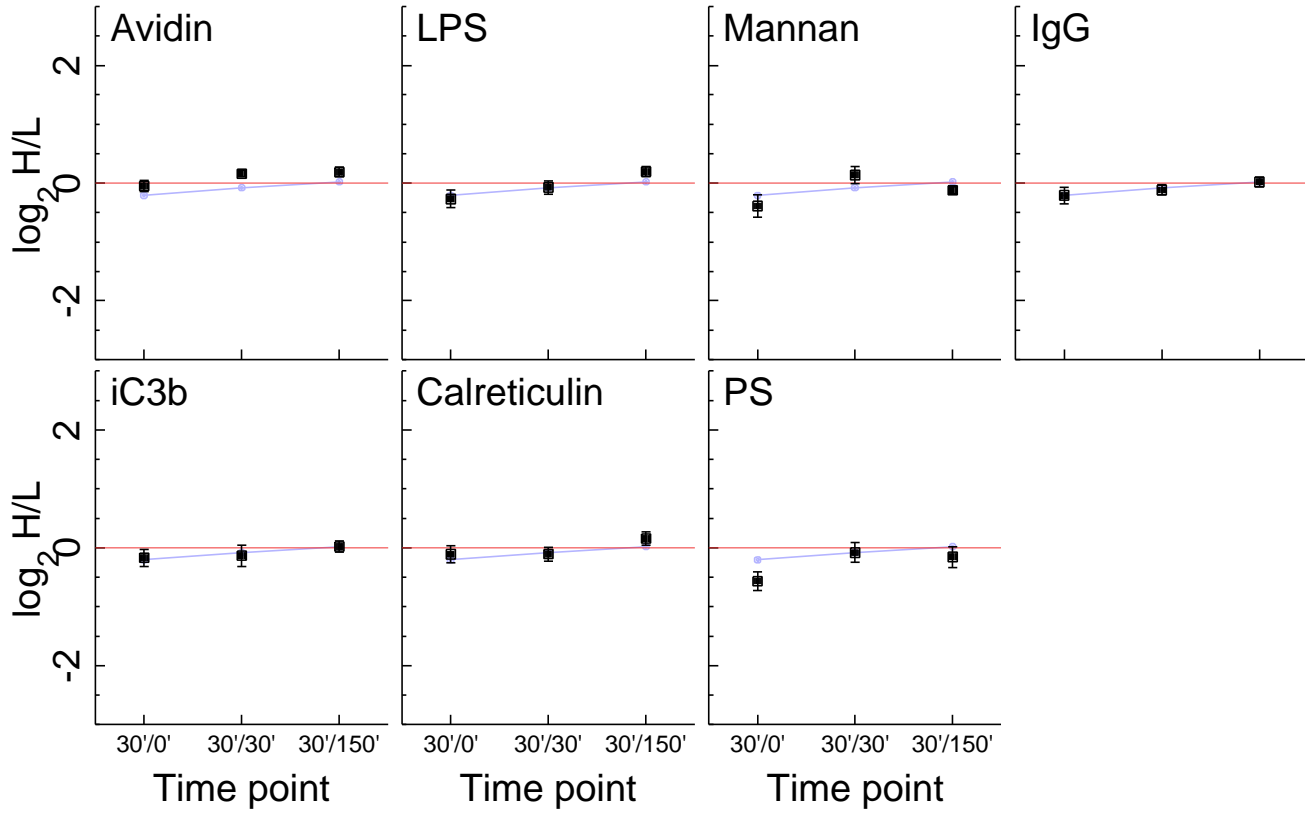

### tap2 (P36371)

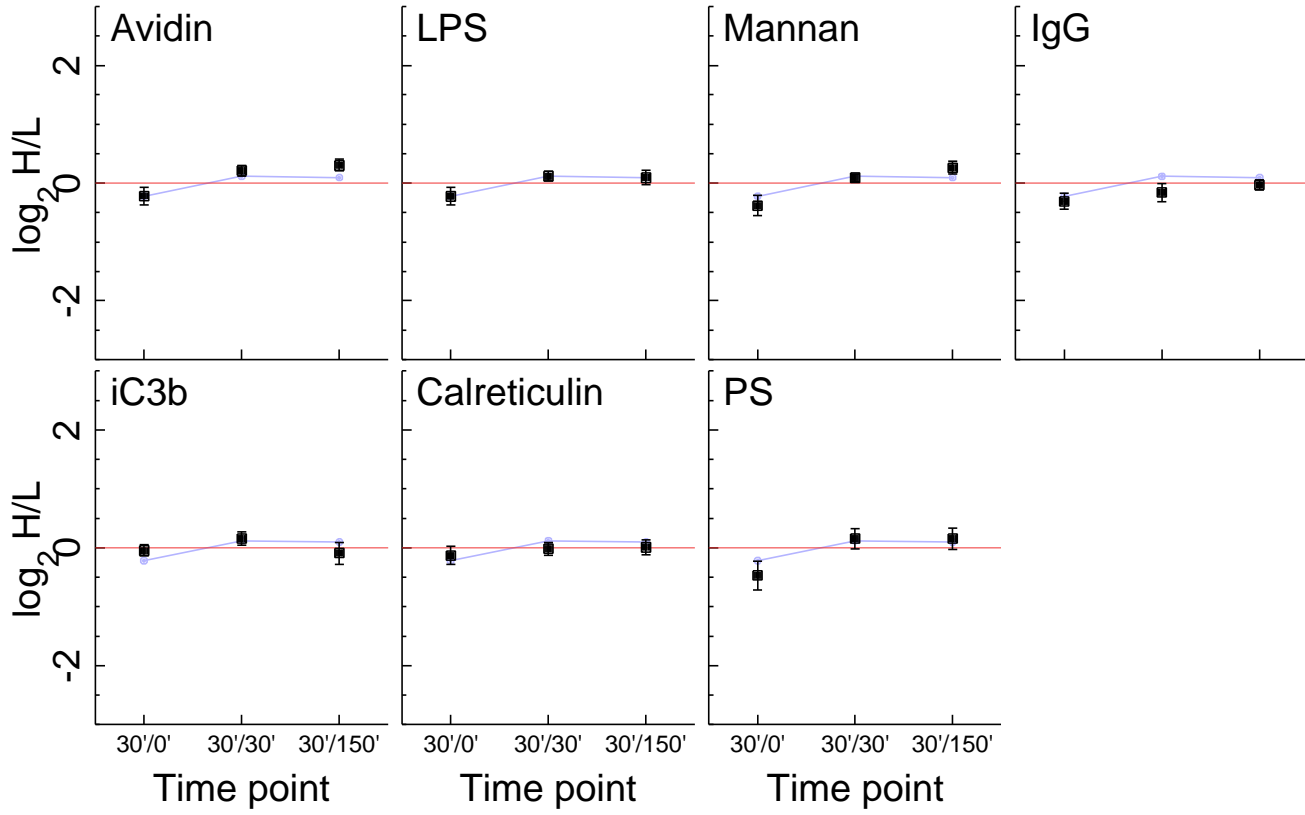

### tapbp (Q3TCU5)

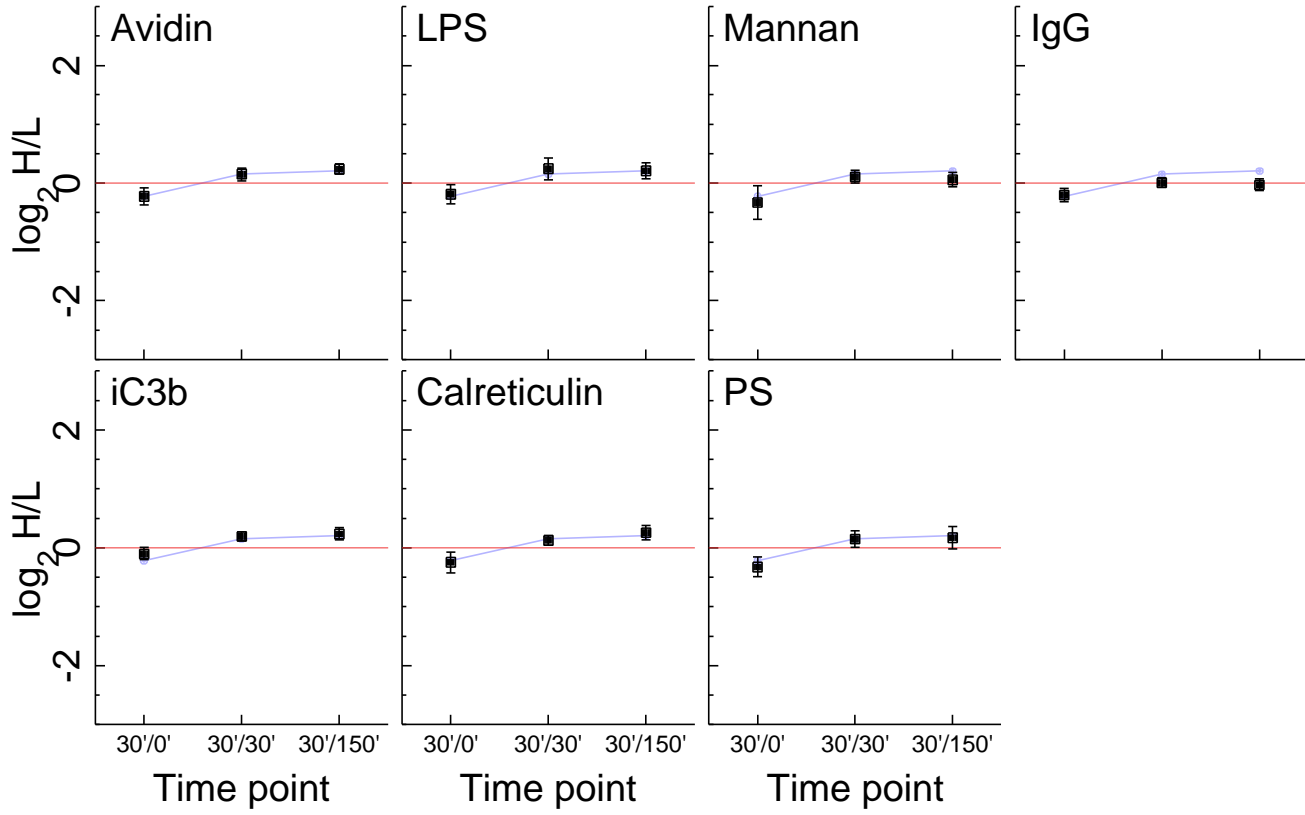



### tardbp (Q921F2)

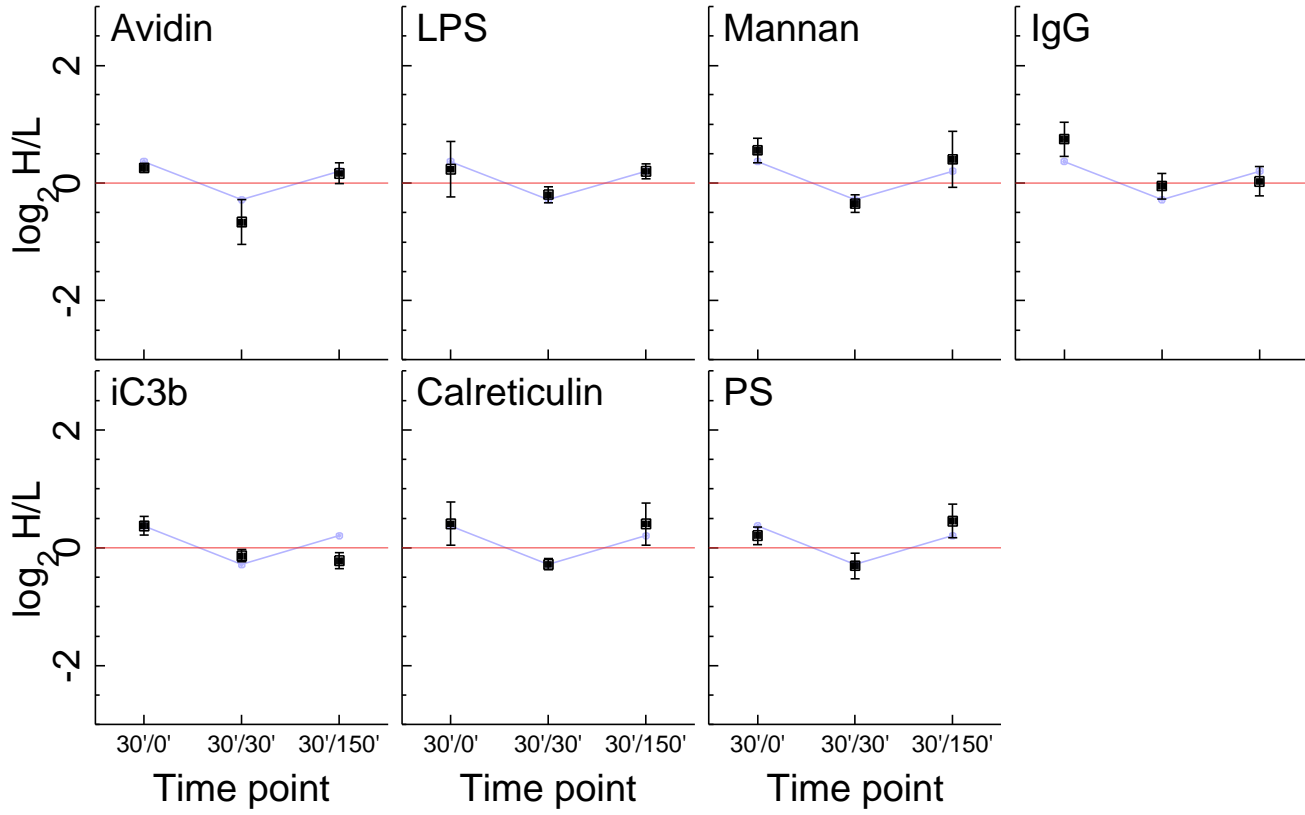

tbc1d22a (Q8R5A6)

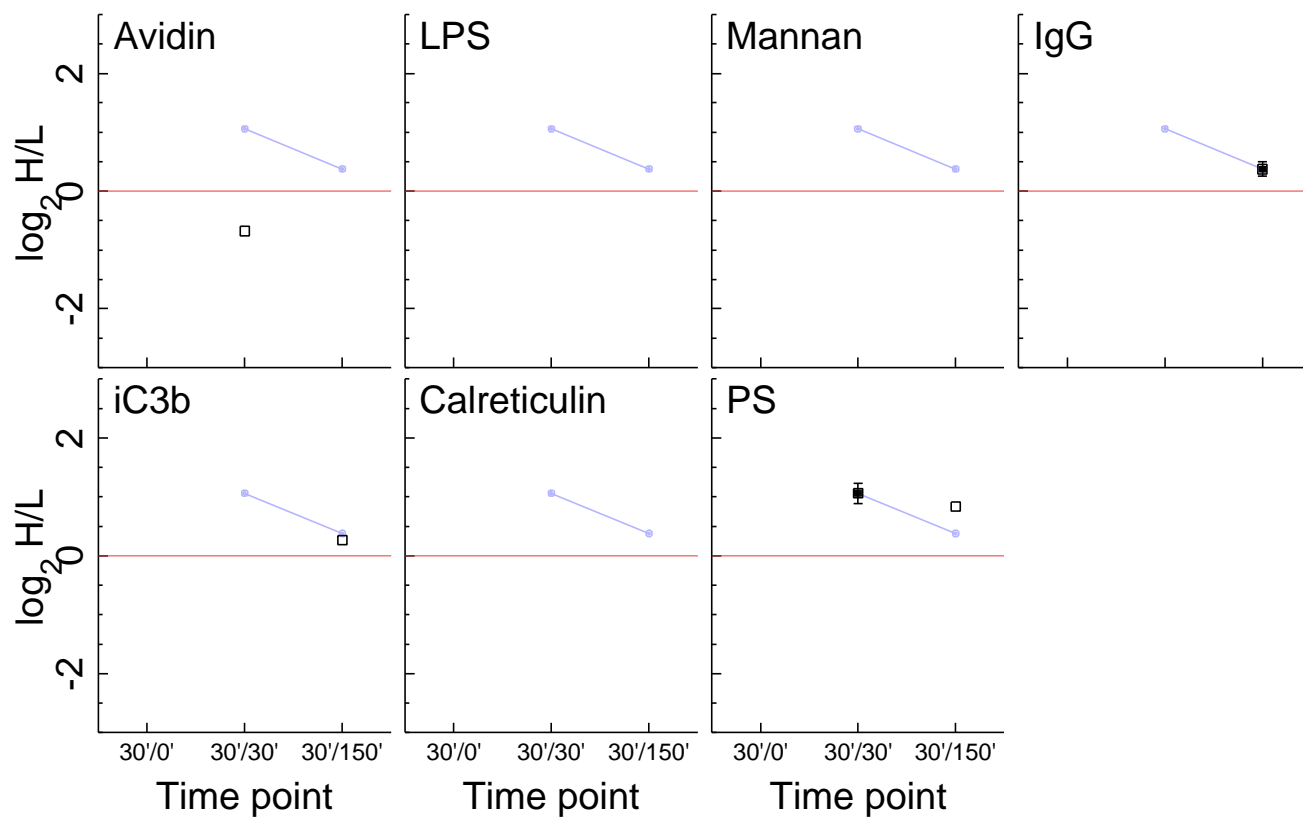

tbc1d2b (Q3U0J8)

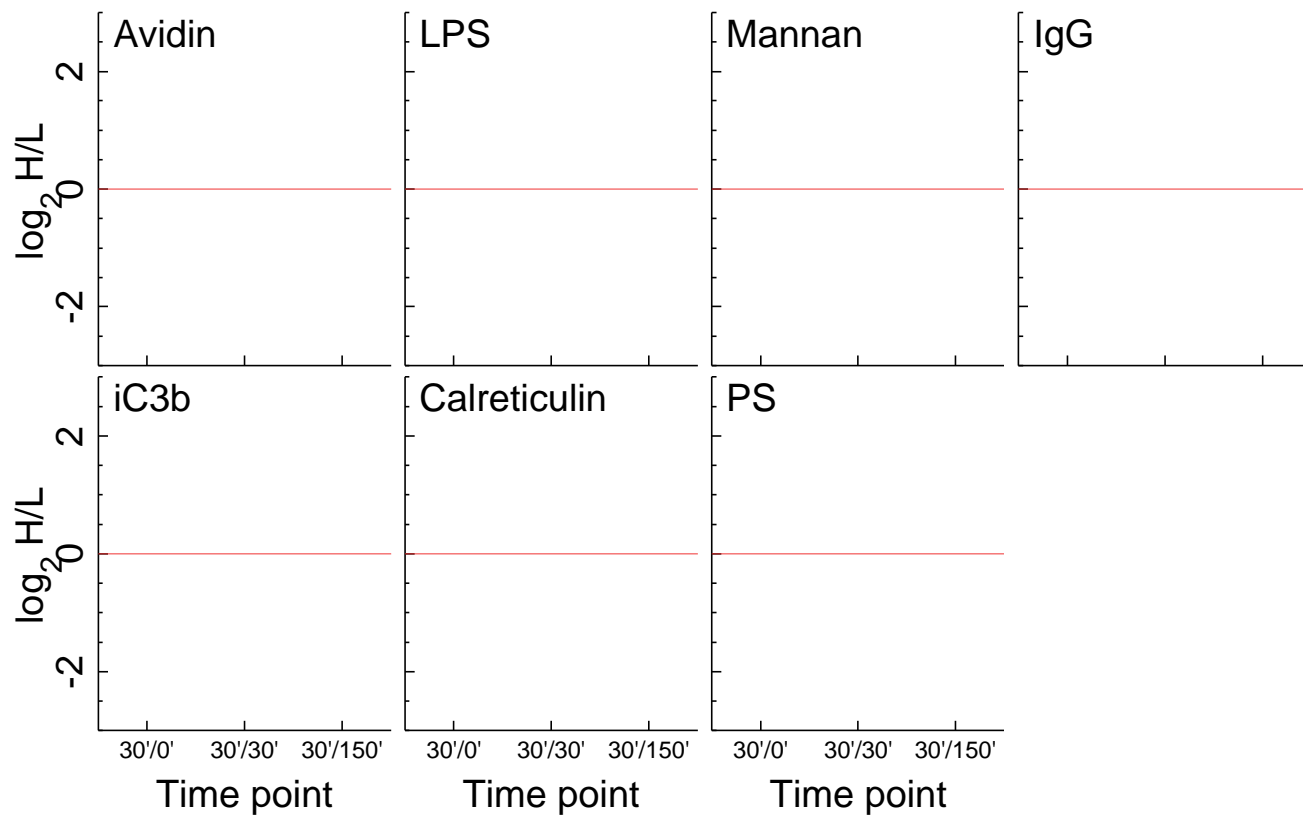

tbc1d5 (Q80XQ2)

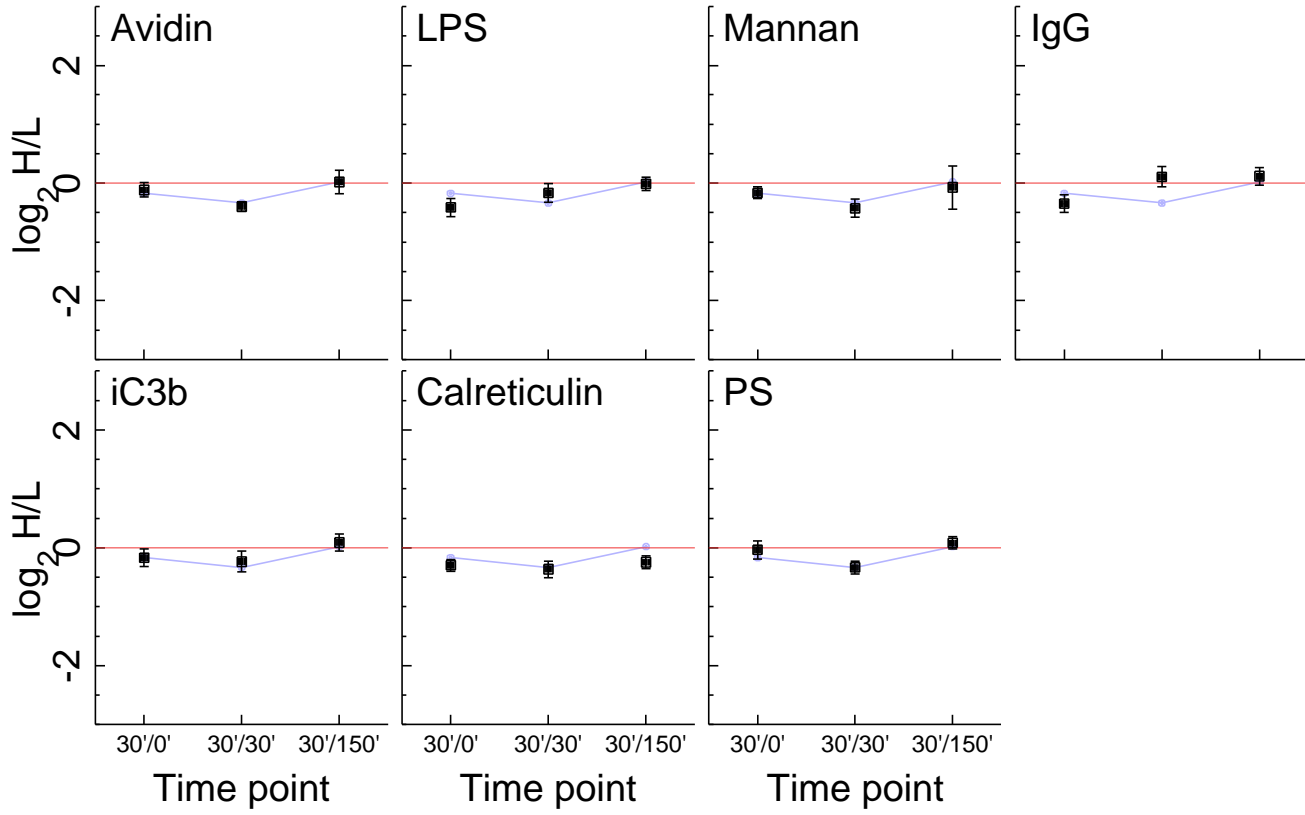

tbl1x (Q9QXE7)

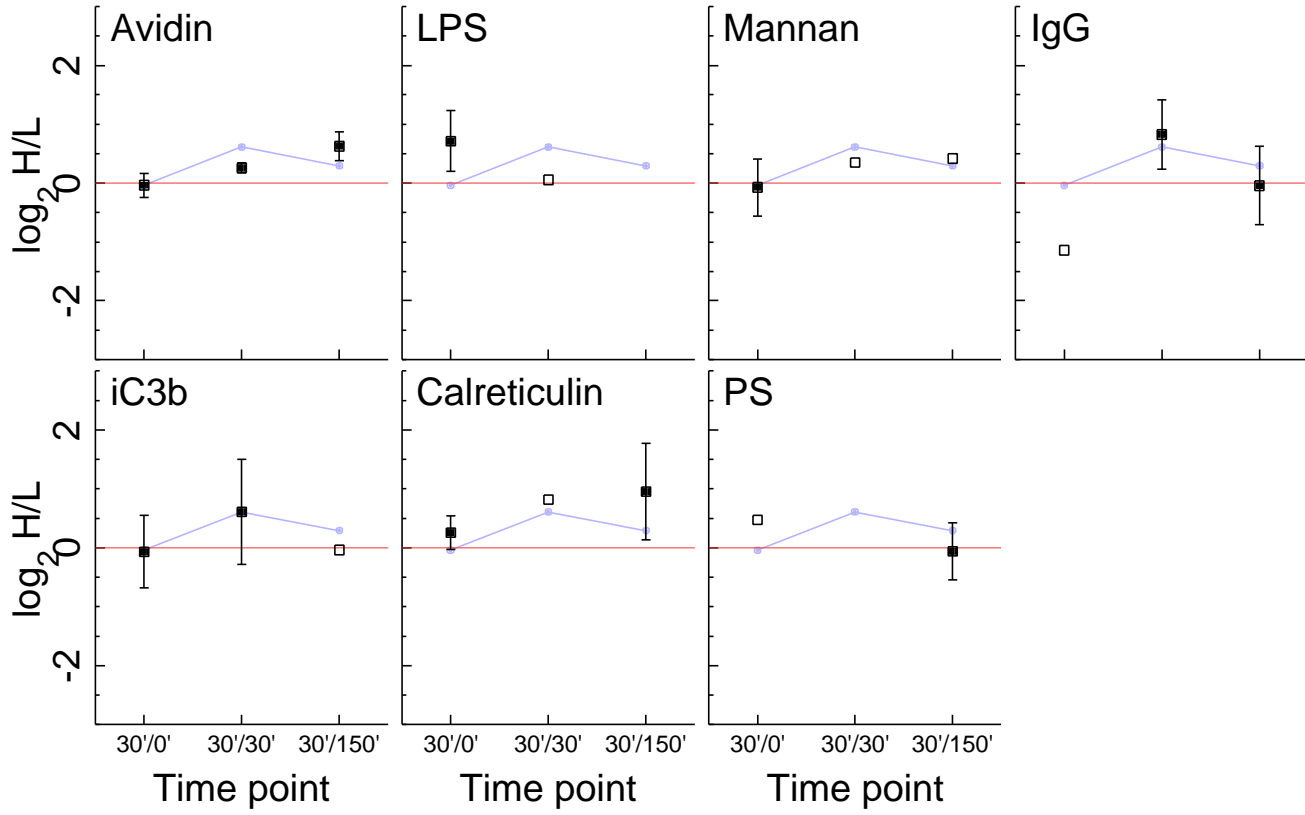

tbxas1 (P36423)

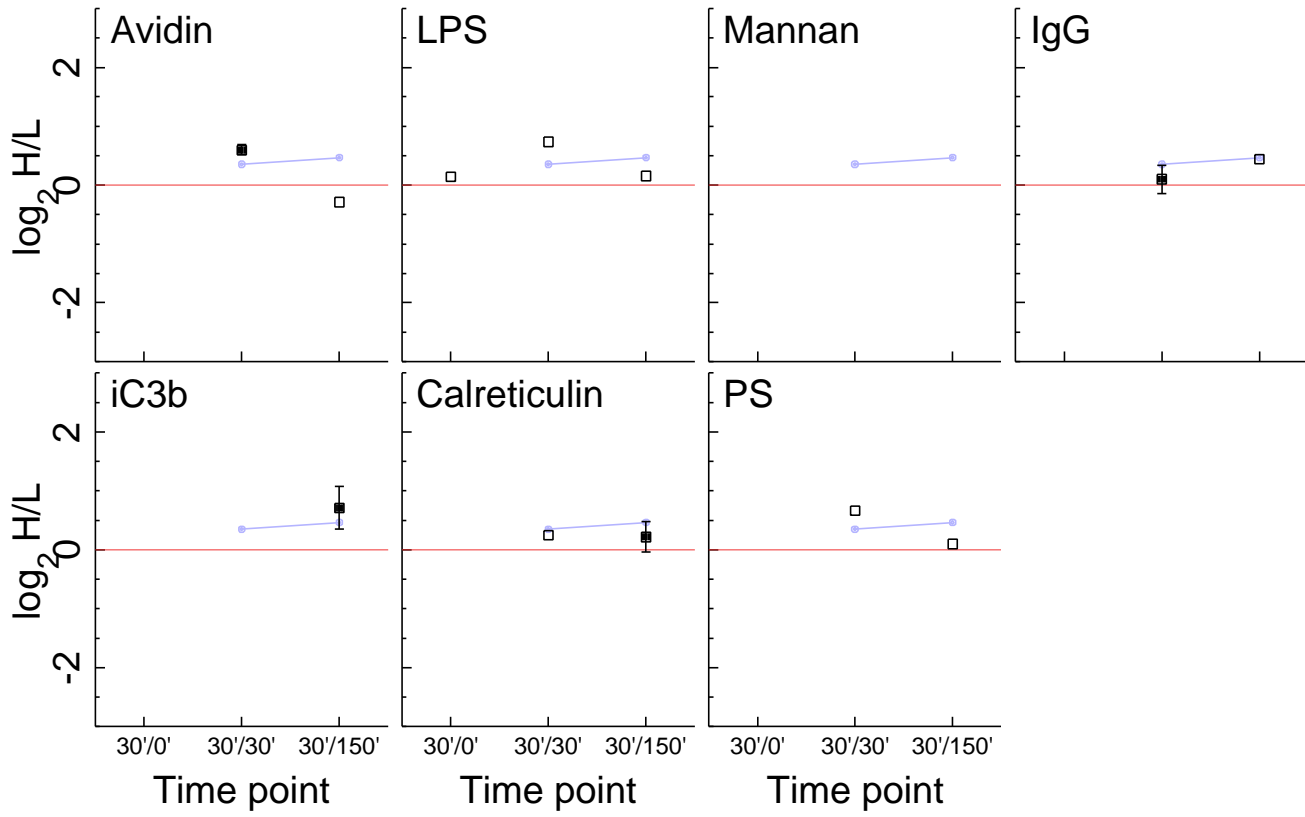

tceb1 (P83940)

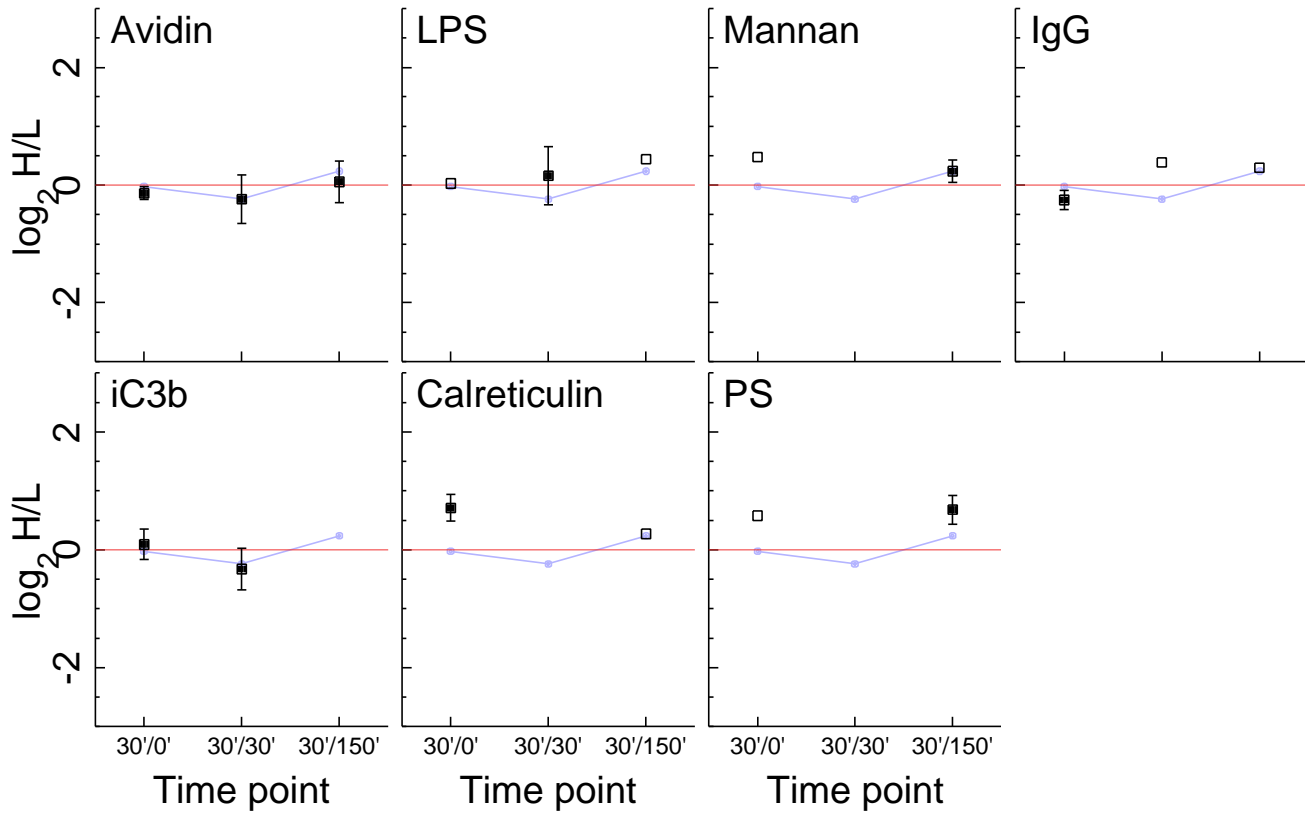

tceb2 (P62869)

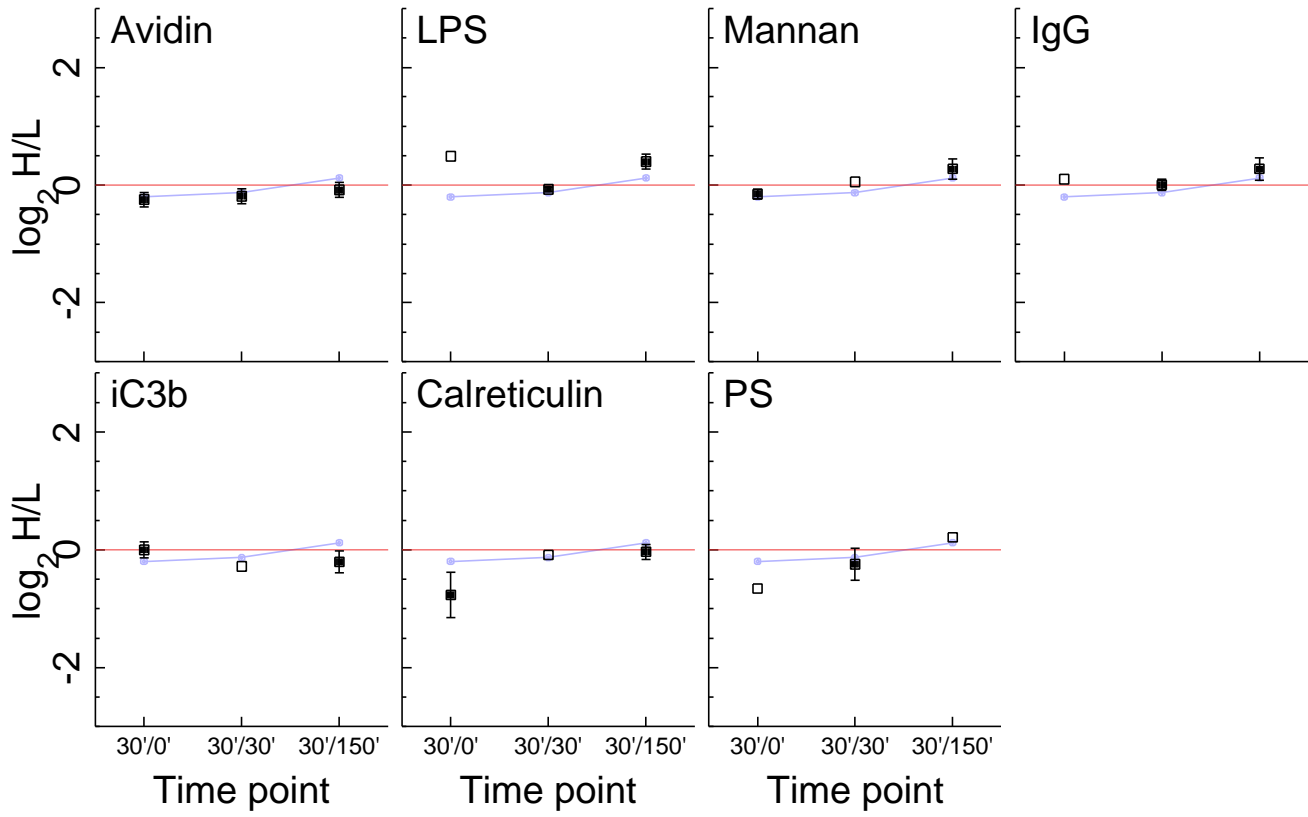



tcirg1 (Q9JHF5)

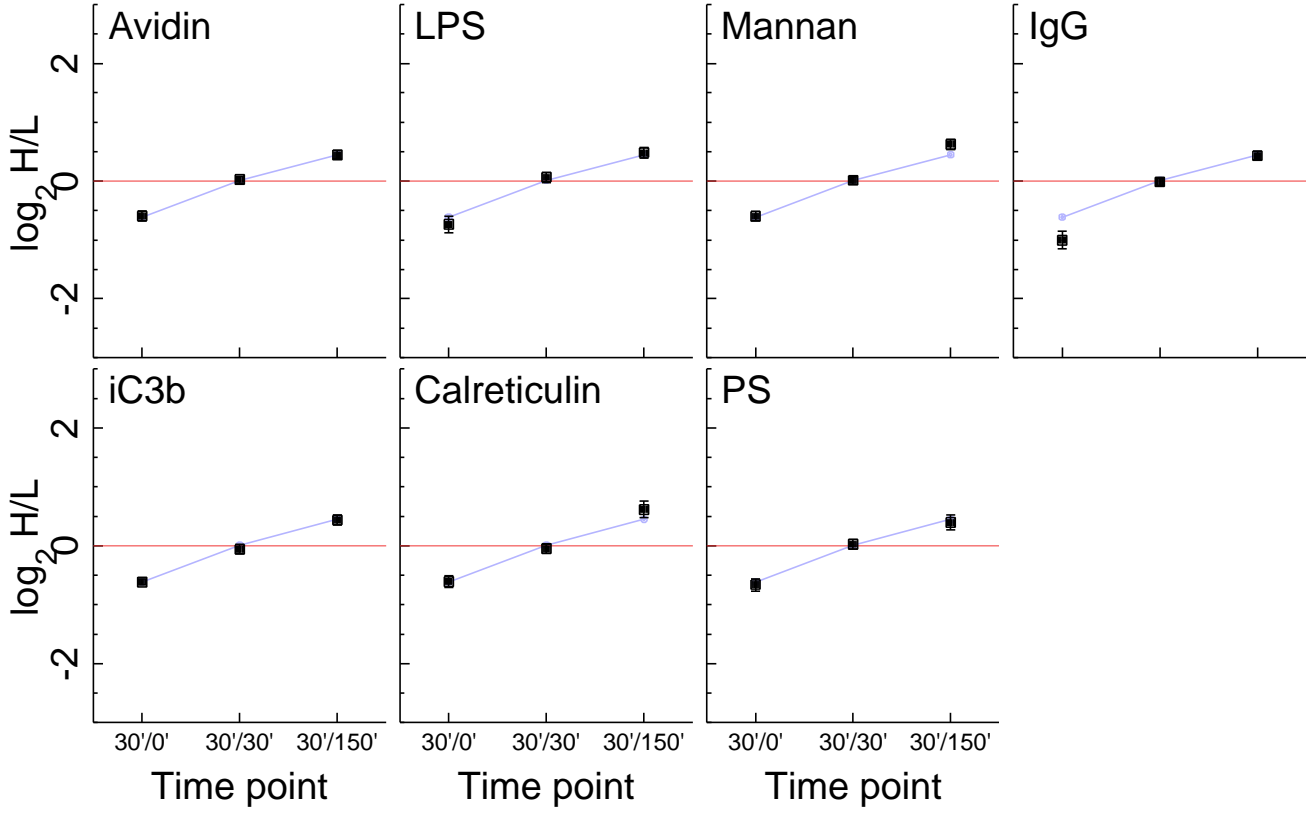

### tcof1 (H3BL37)

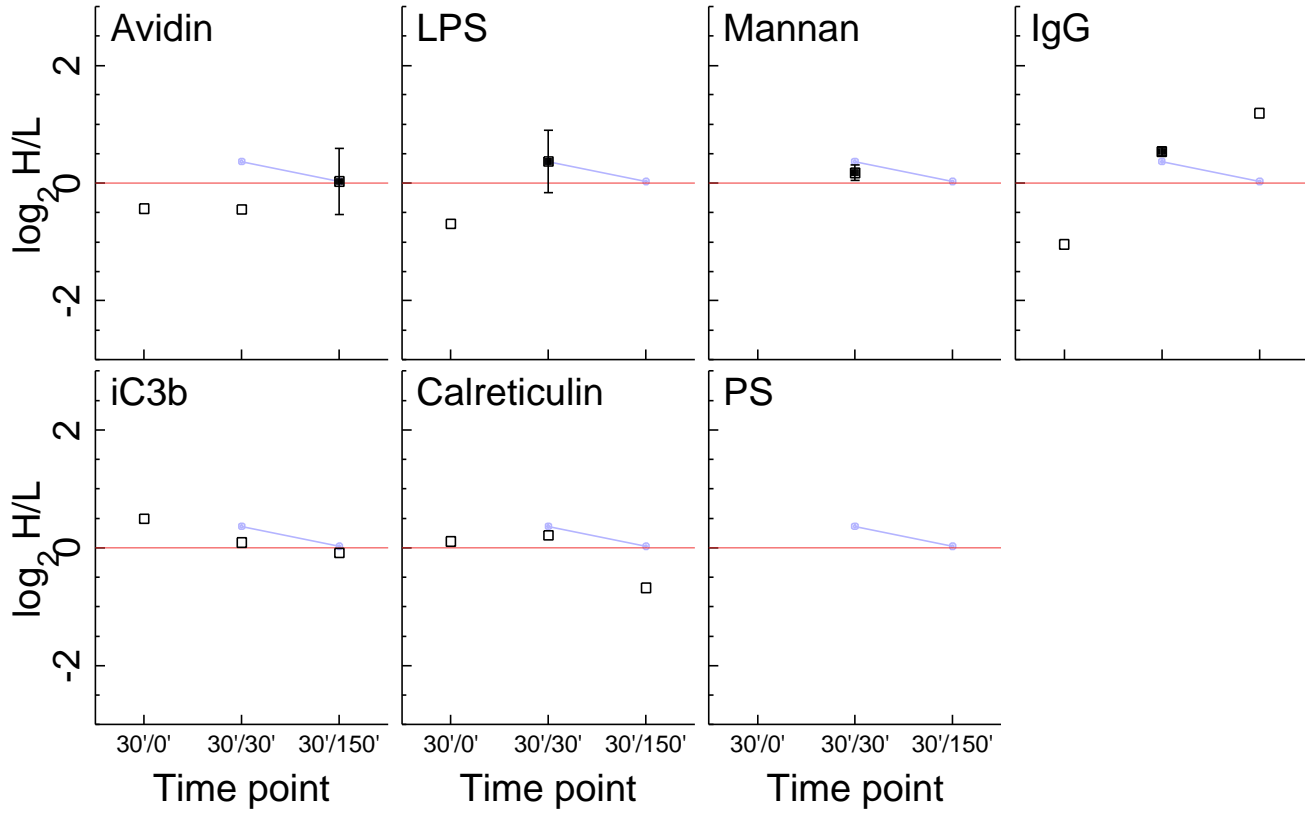

### tcp1 (P11983)

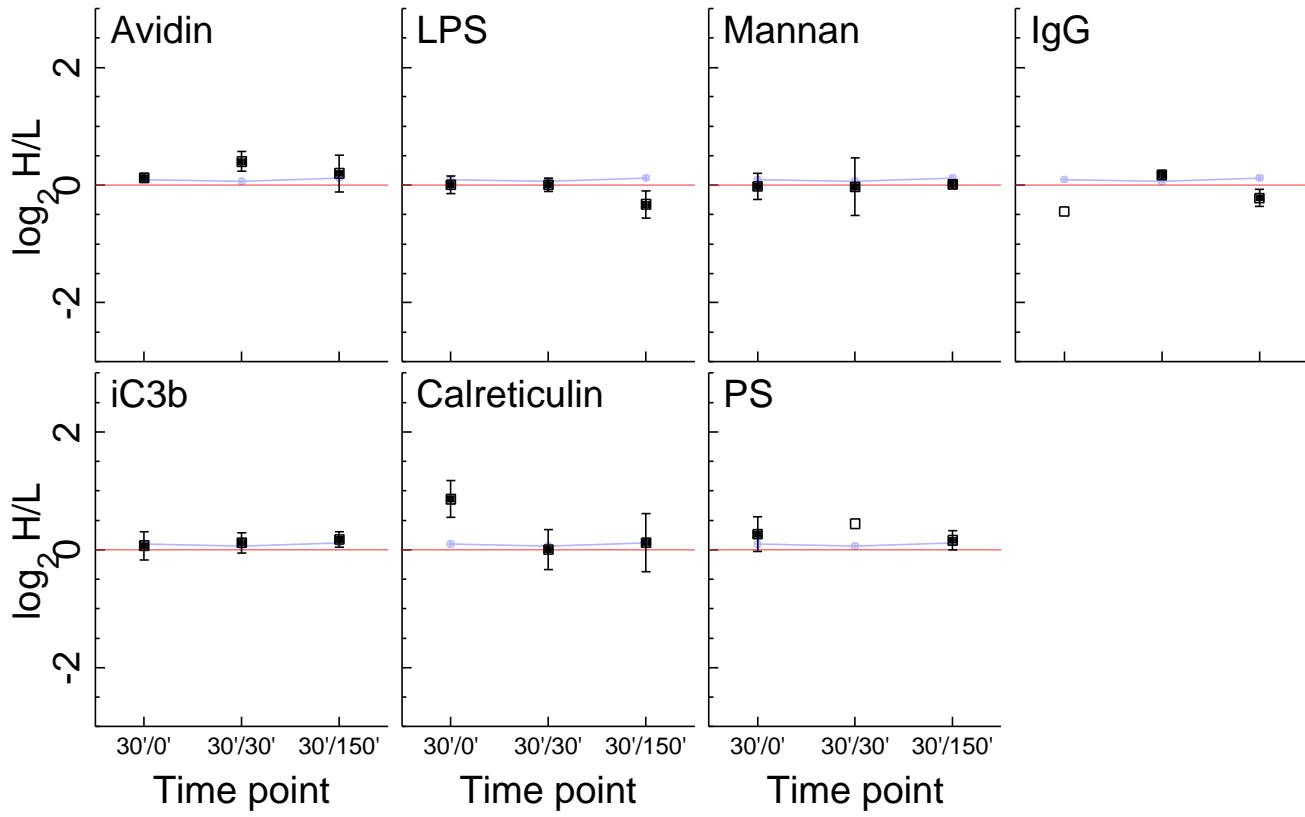

tdrd7 (Q8K1H1)

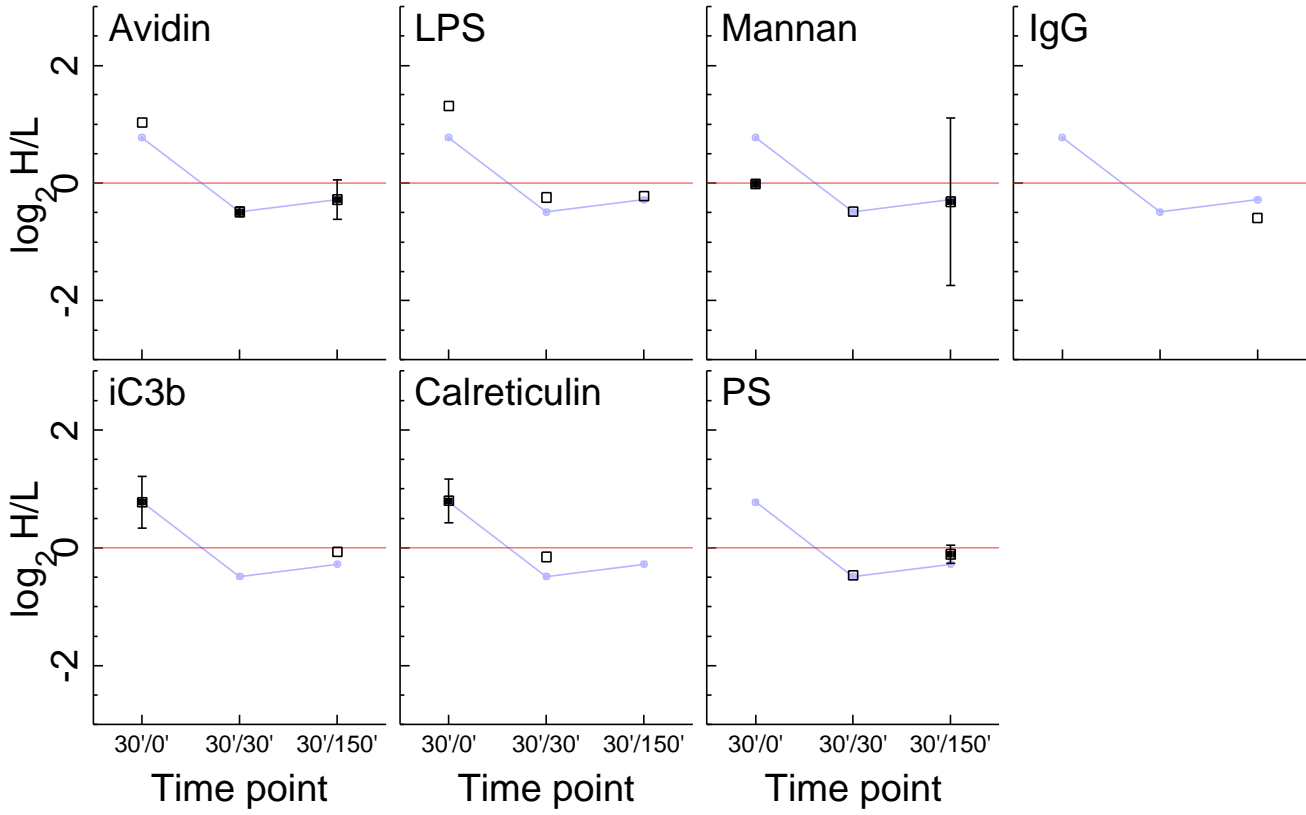

tecpr1 (Q80VP0)

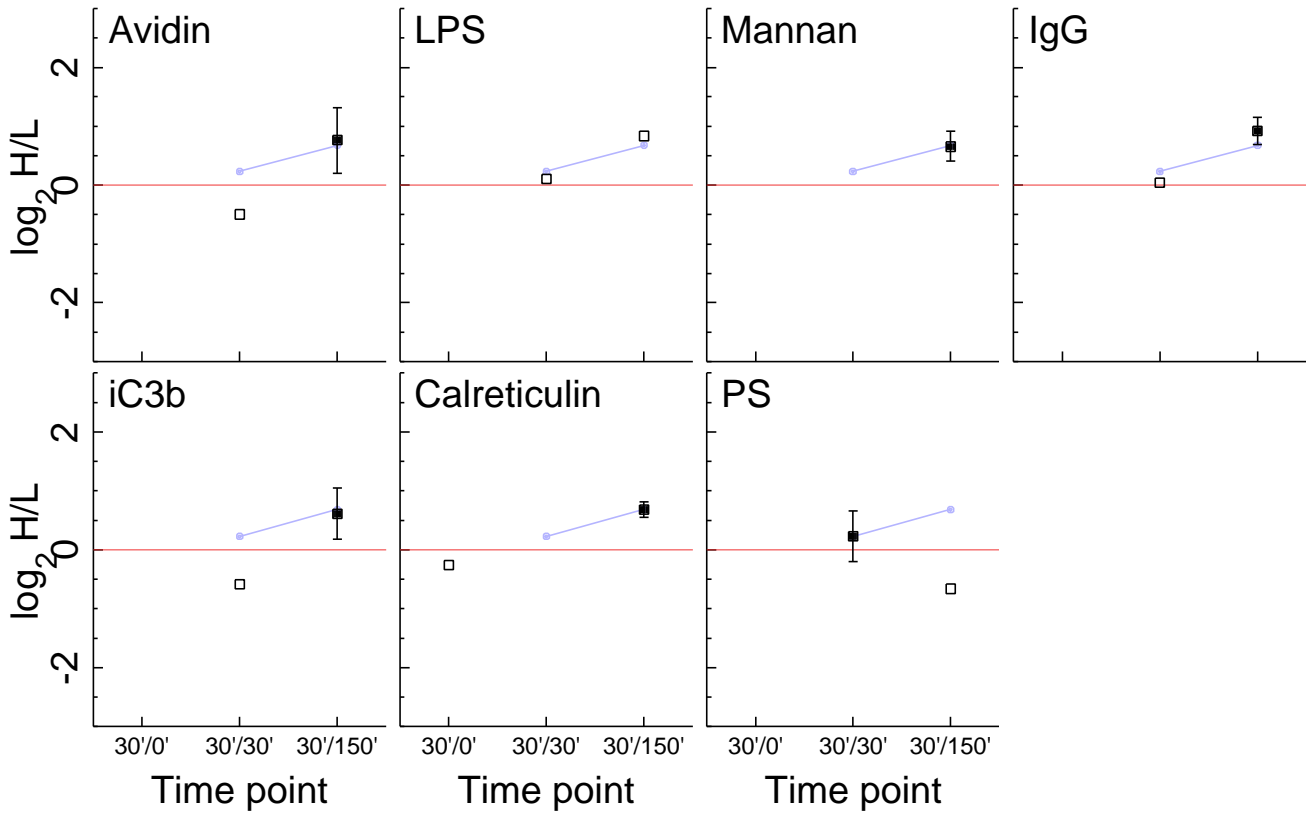

tecr (Q9CY27)

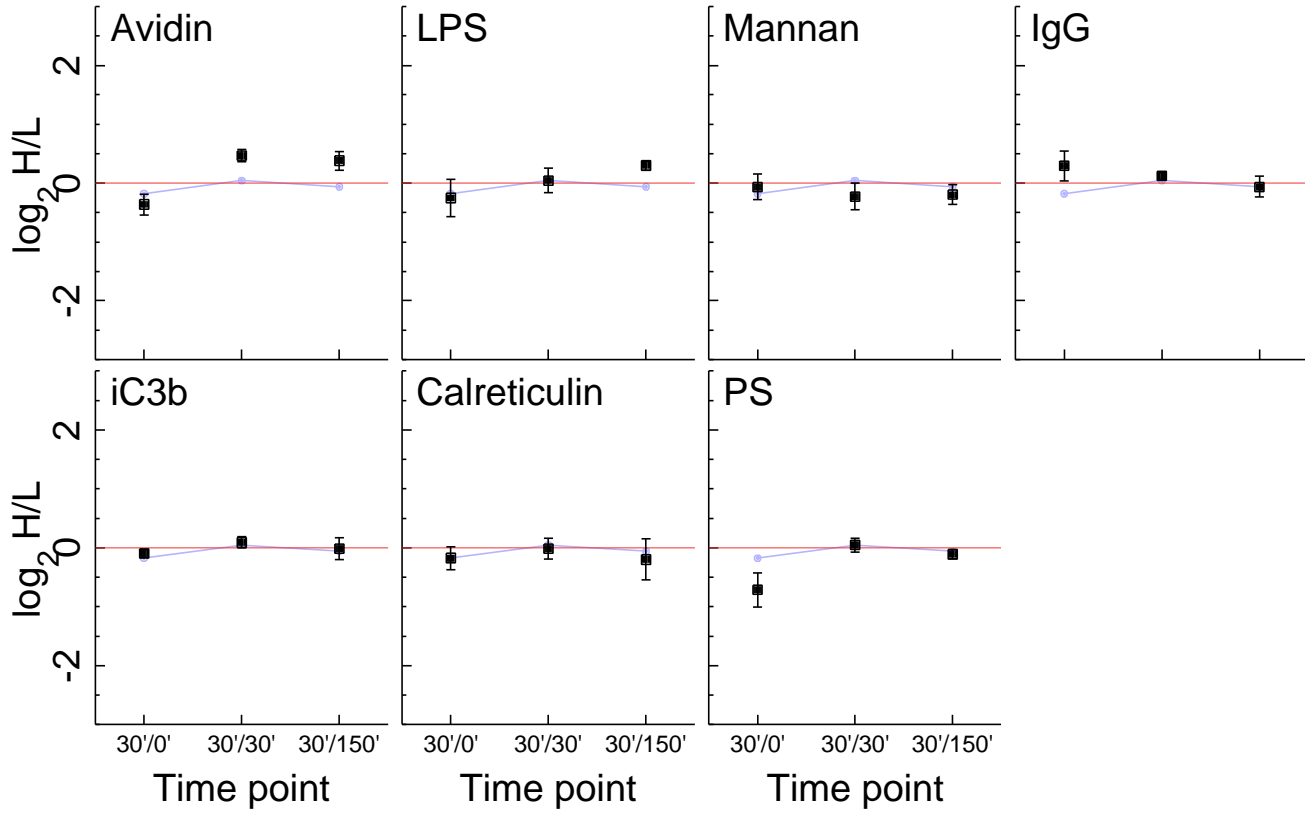

tes (Q921W7)

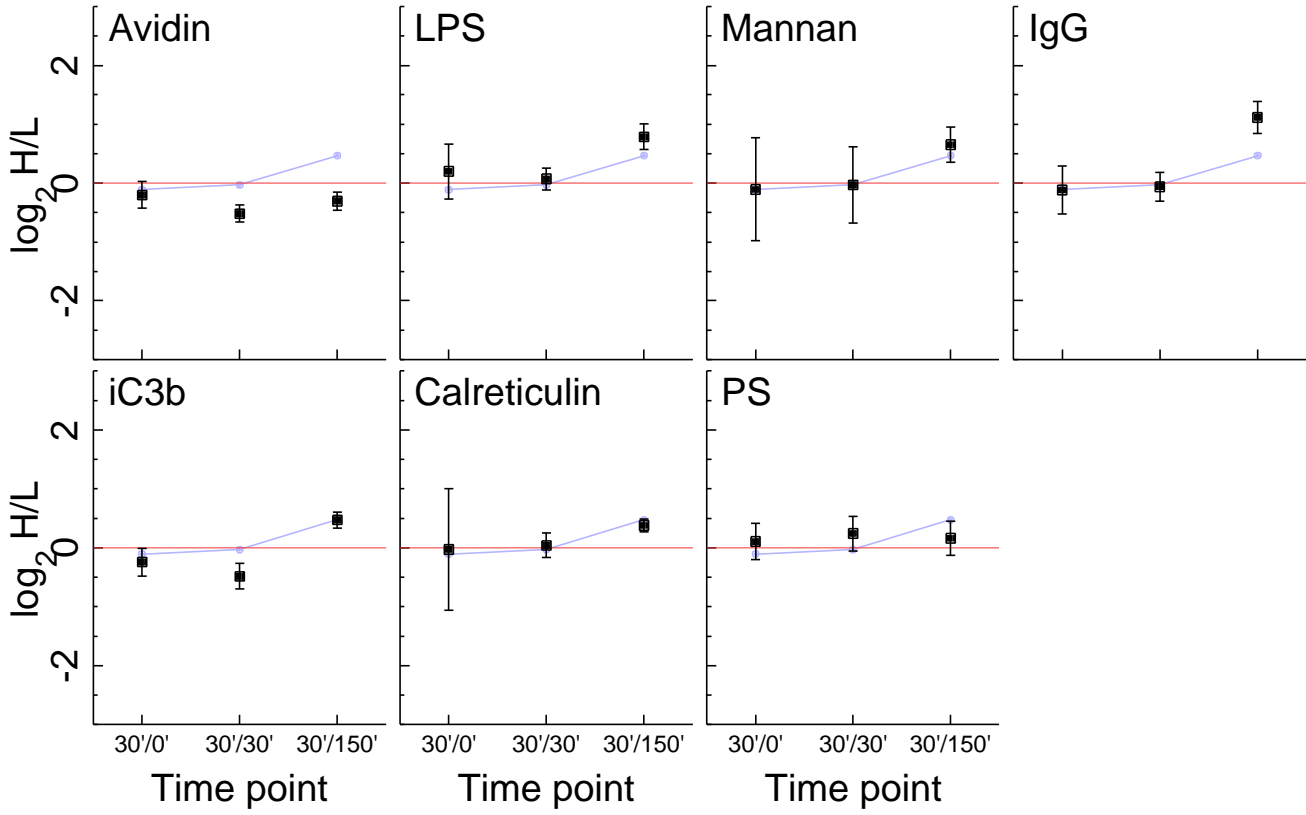

tex264 (E9Q137)

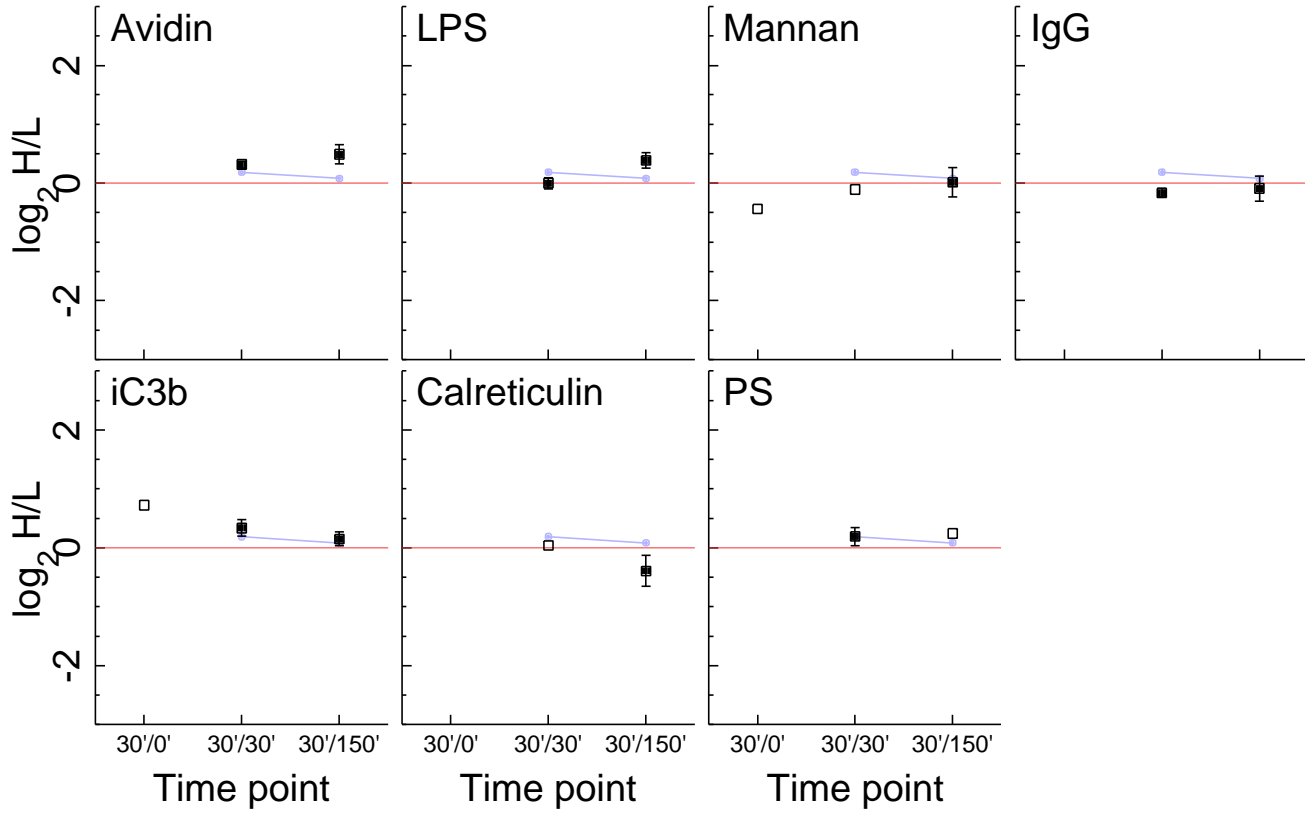



### tfe3 (A2AEW1)

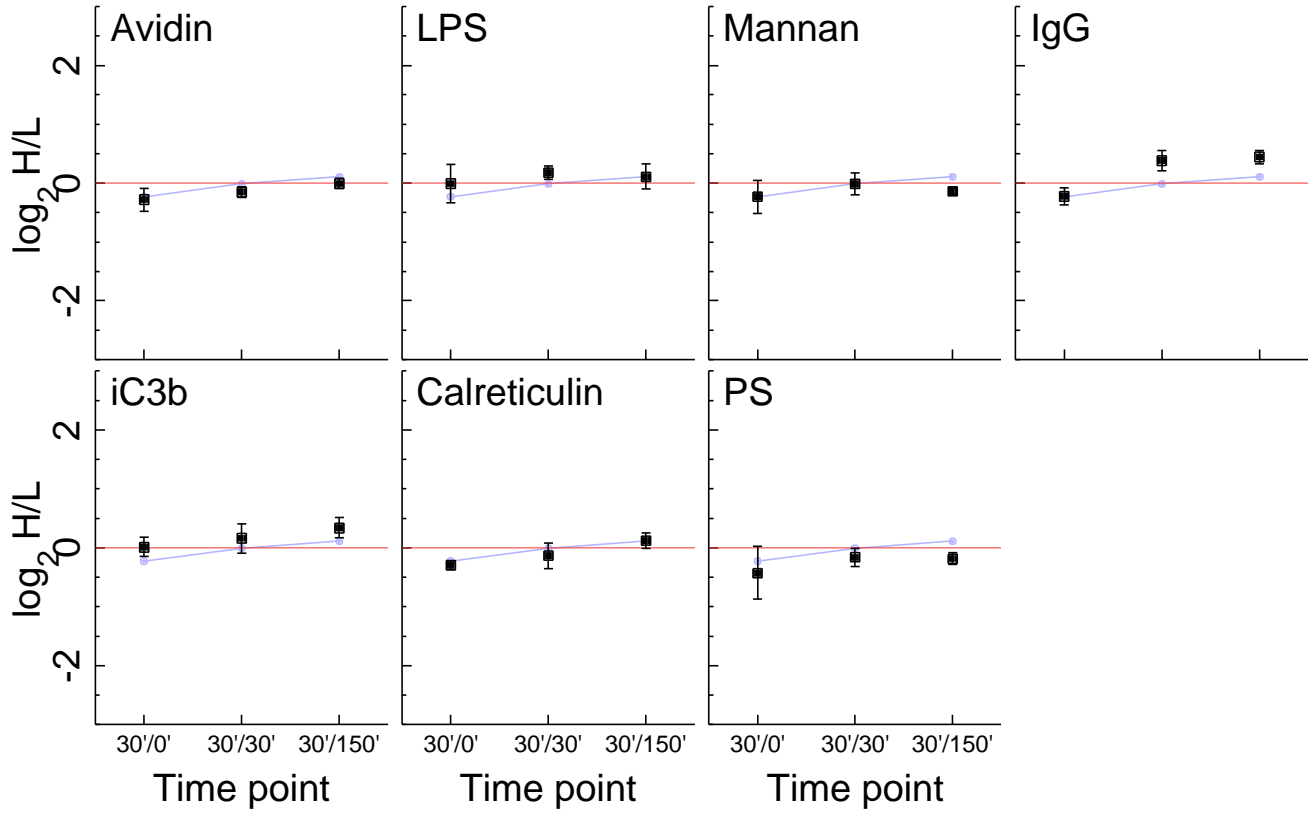

tfr (Q62351)

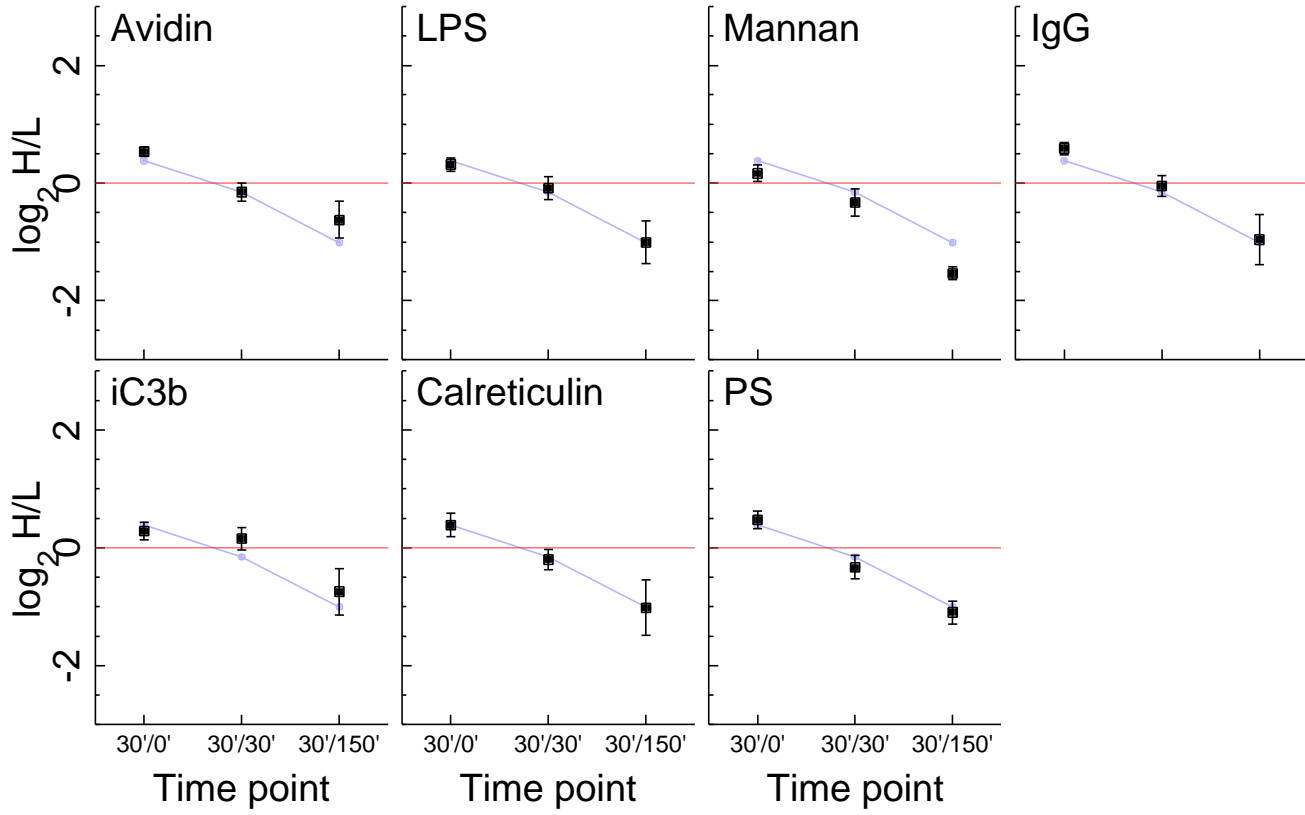

tgfbi (P82198)

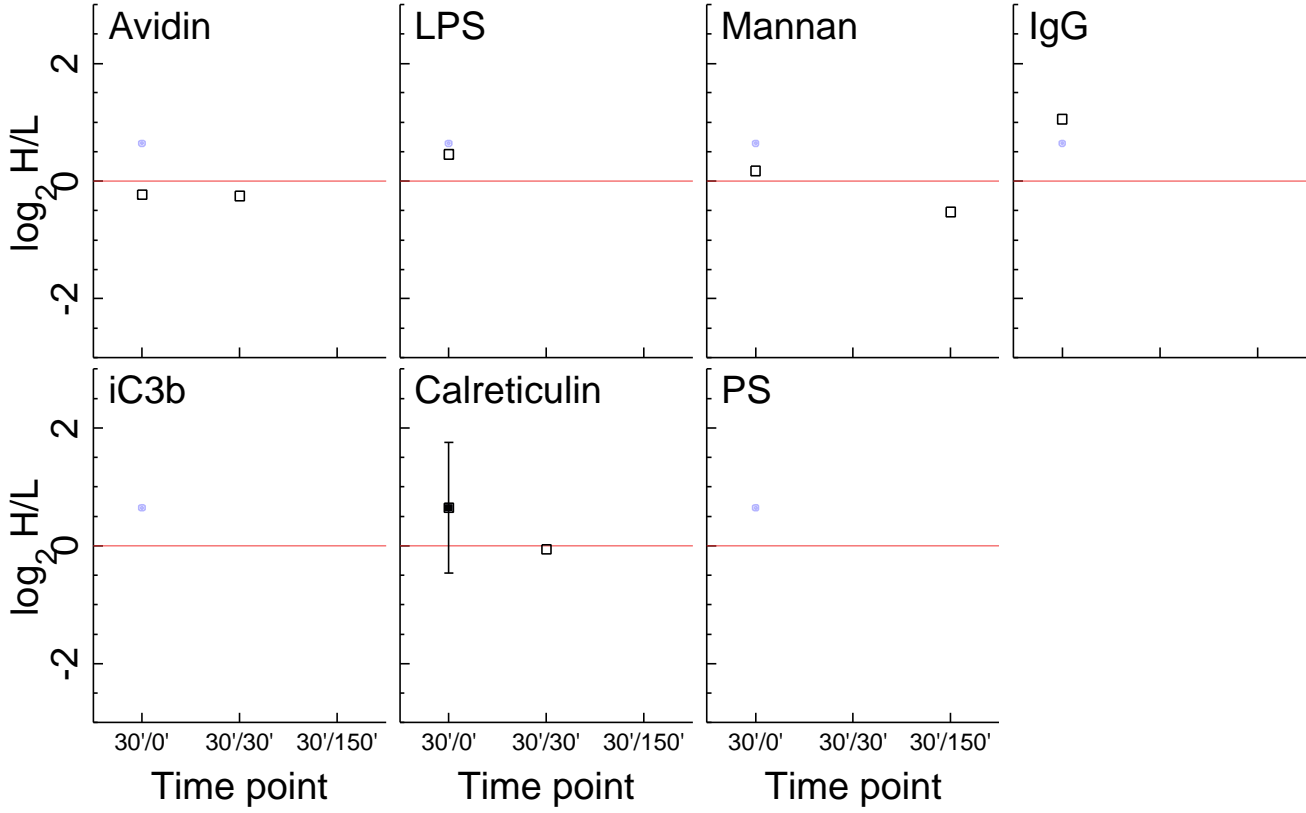

tgm2 (P21981)

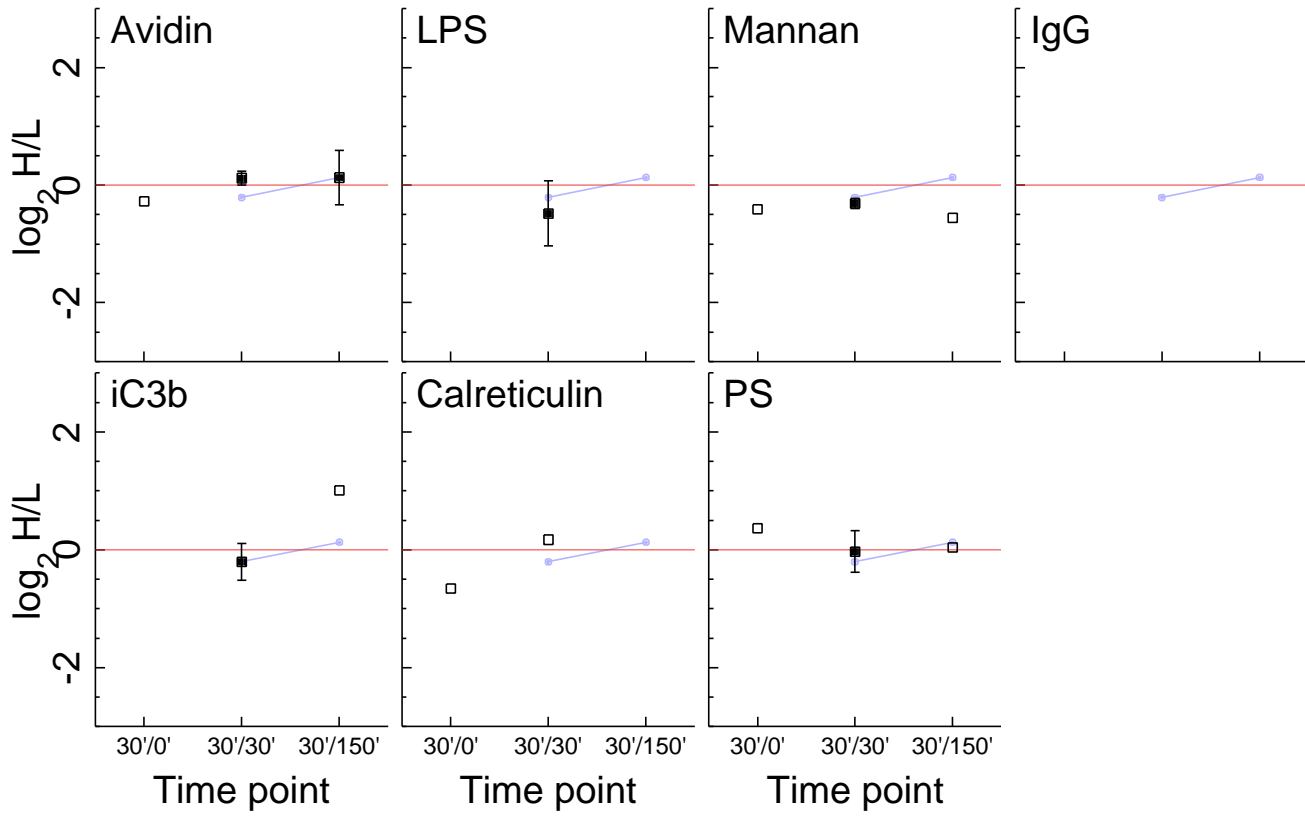

themis2 (Q91YX0)

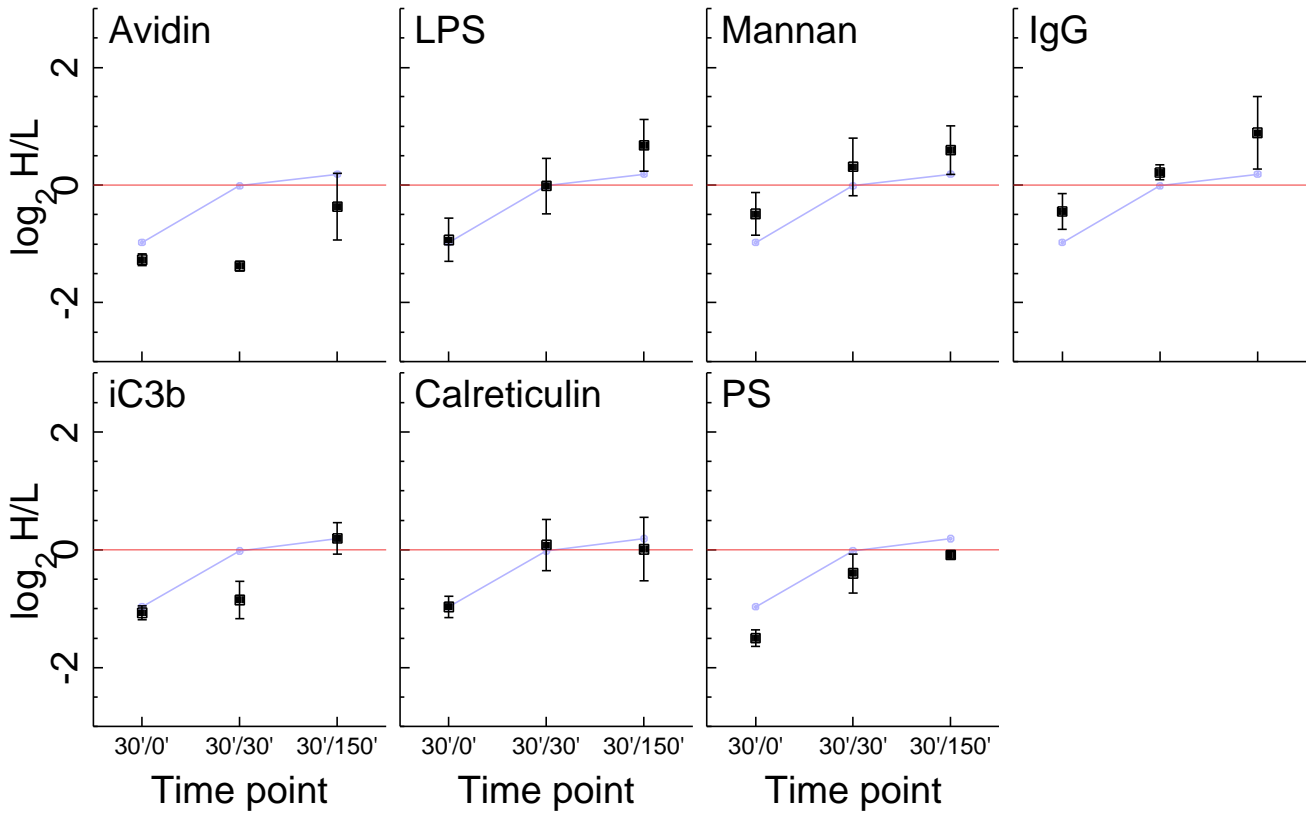

### thrap3 (Q569Z6)

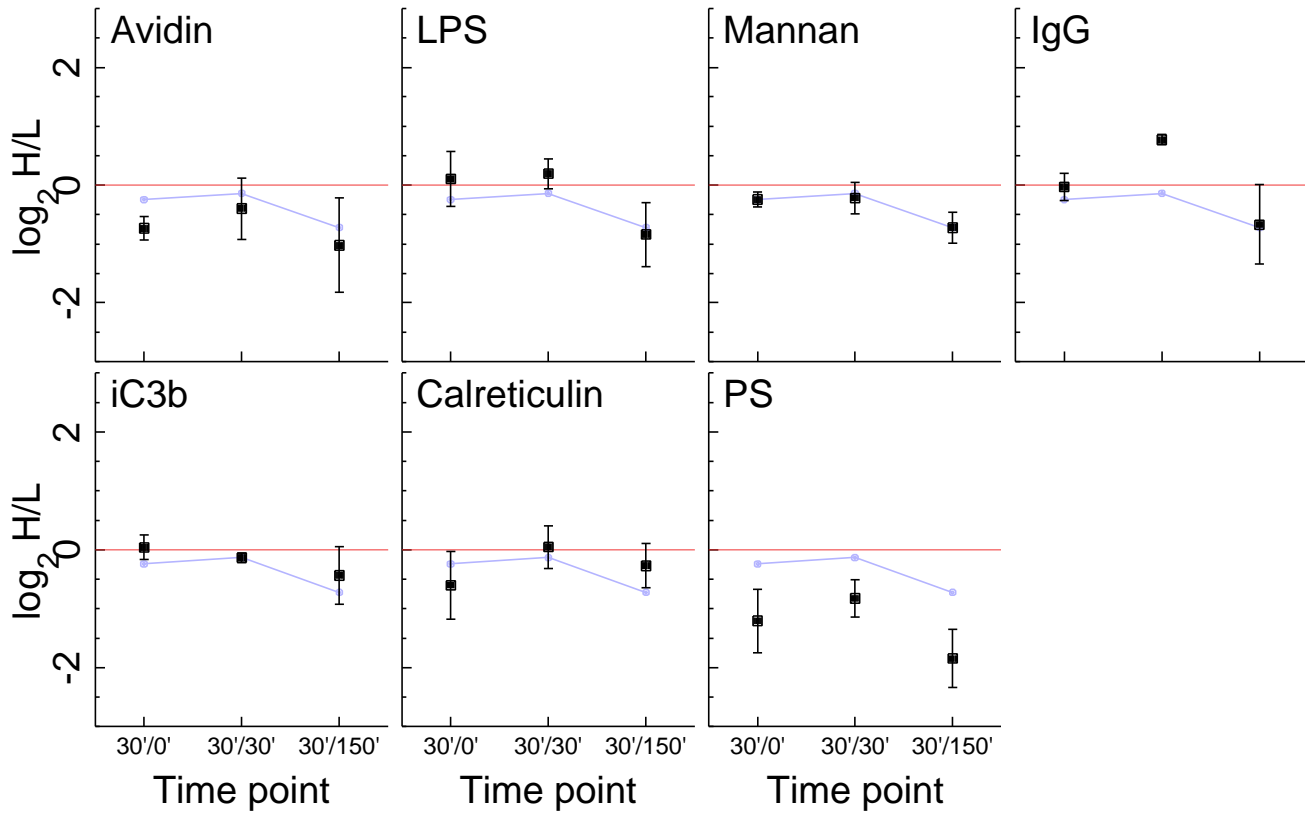

tim44 (O35857)

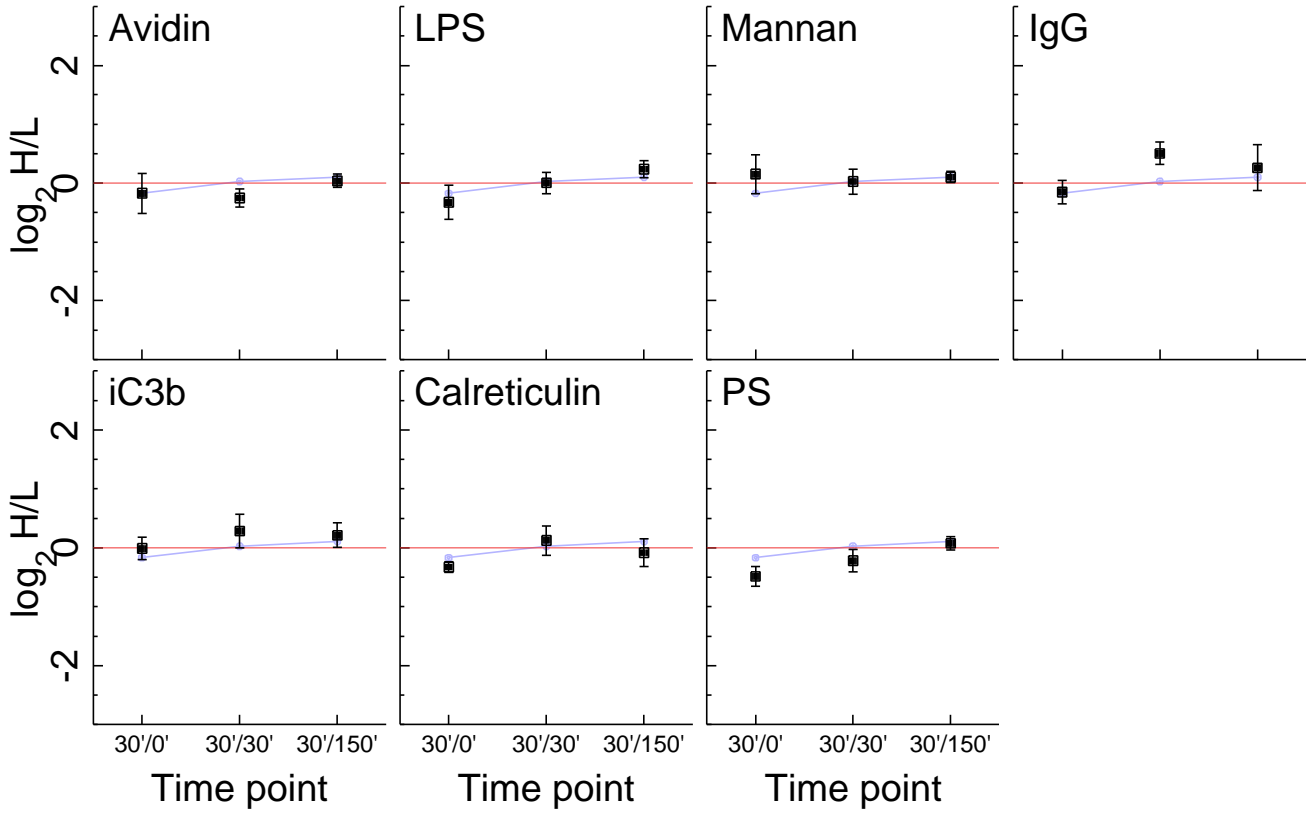

timmm50 (Q9D880)

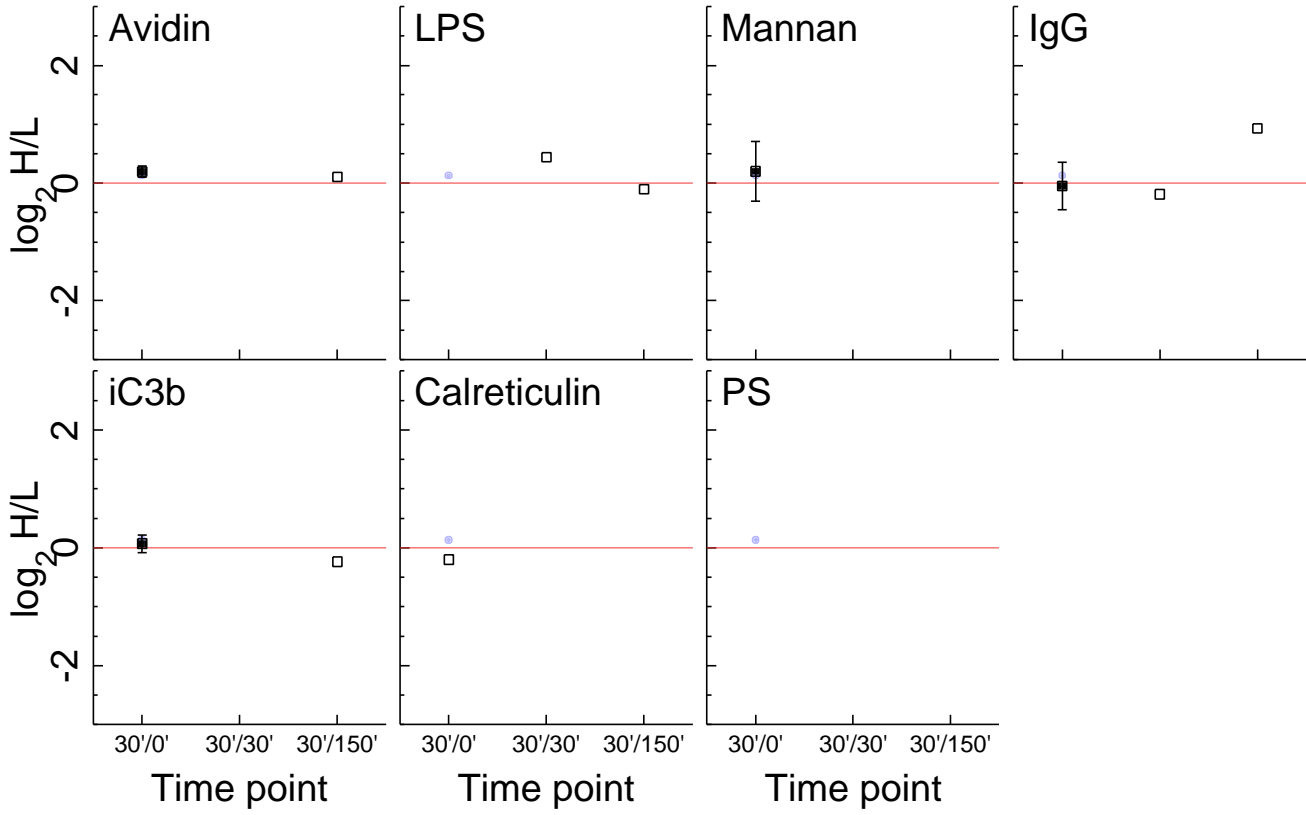



tim9 (Q9WV98)

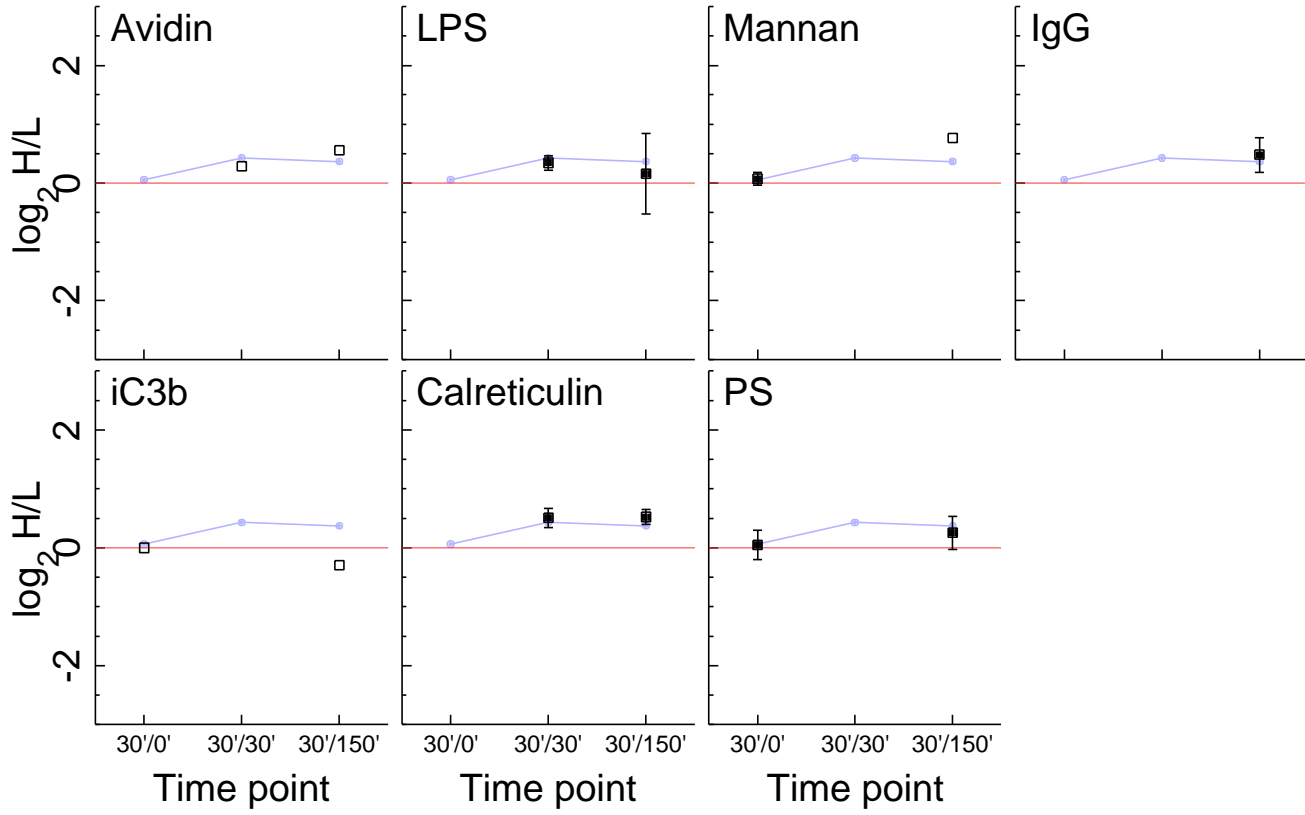

tkf (P40142)

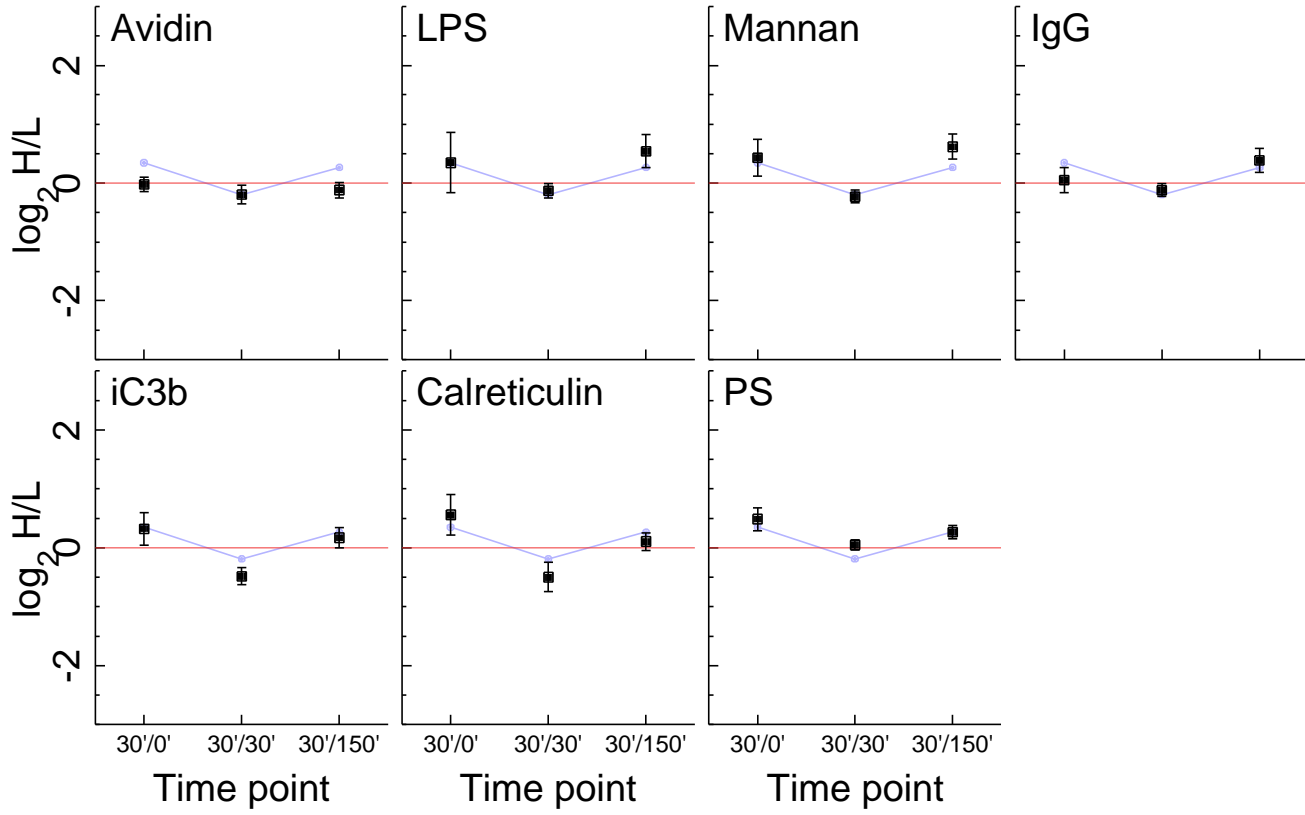

tln1 (P26039)

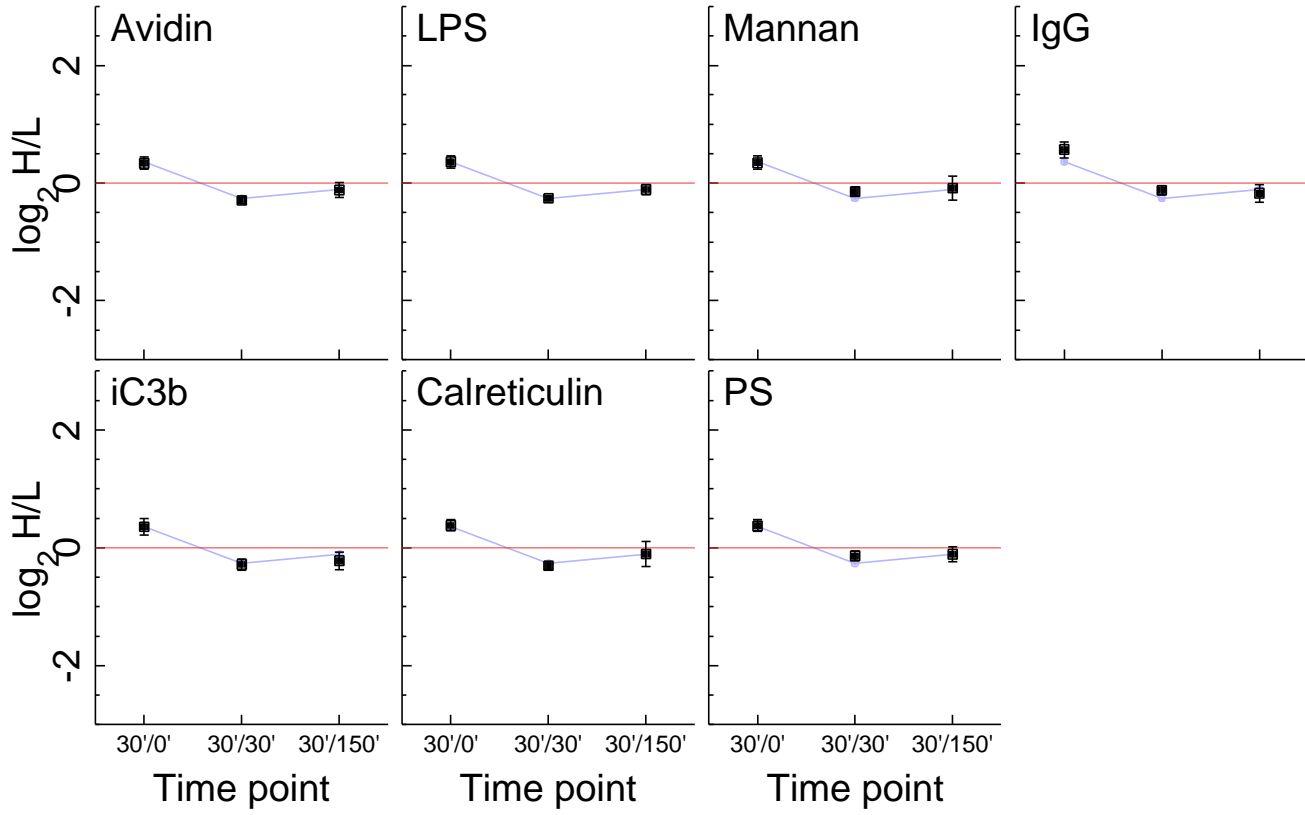

tlr13 (Q6R5N8)

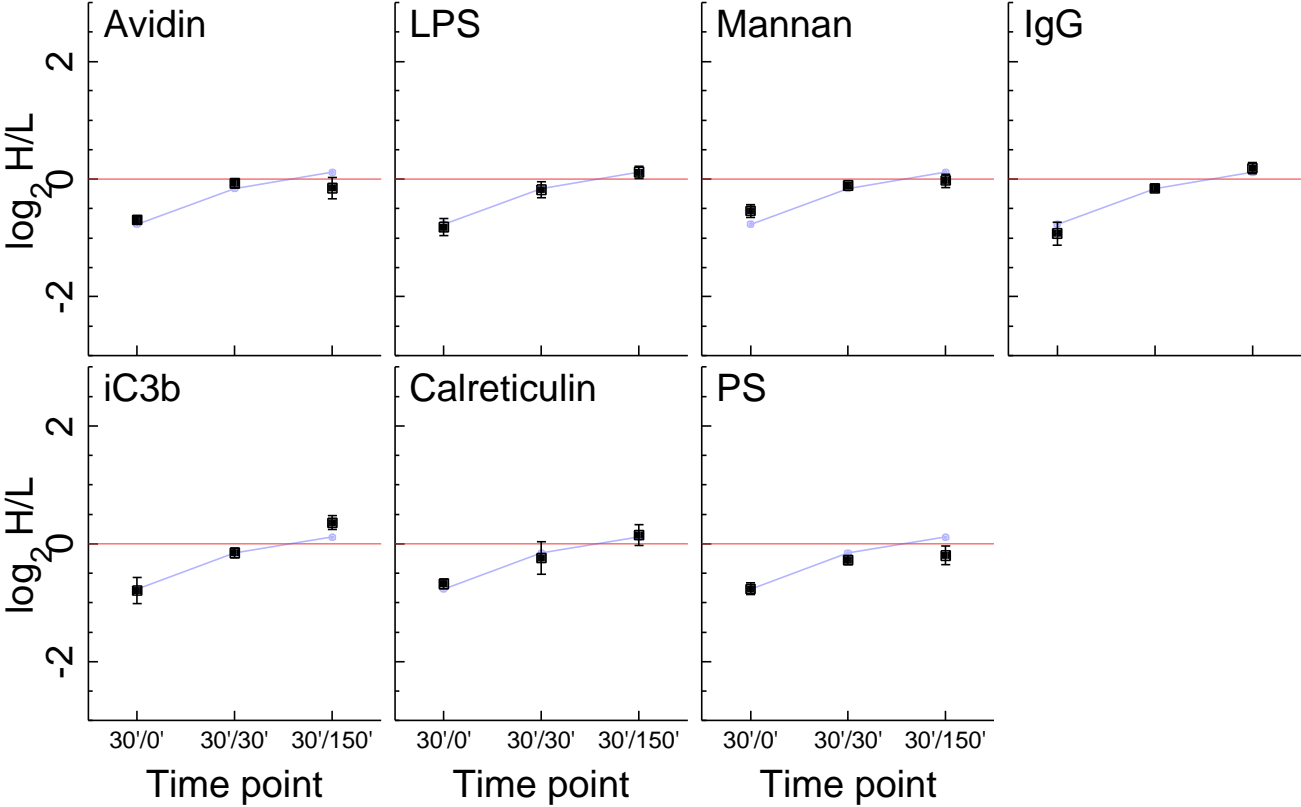

### tlr2 (G3X8Y8)

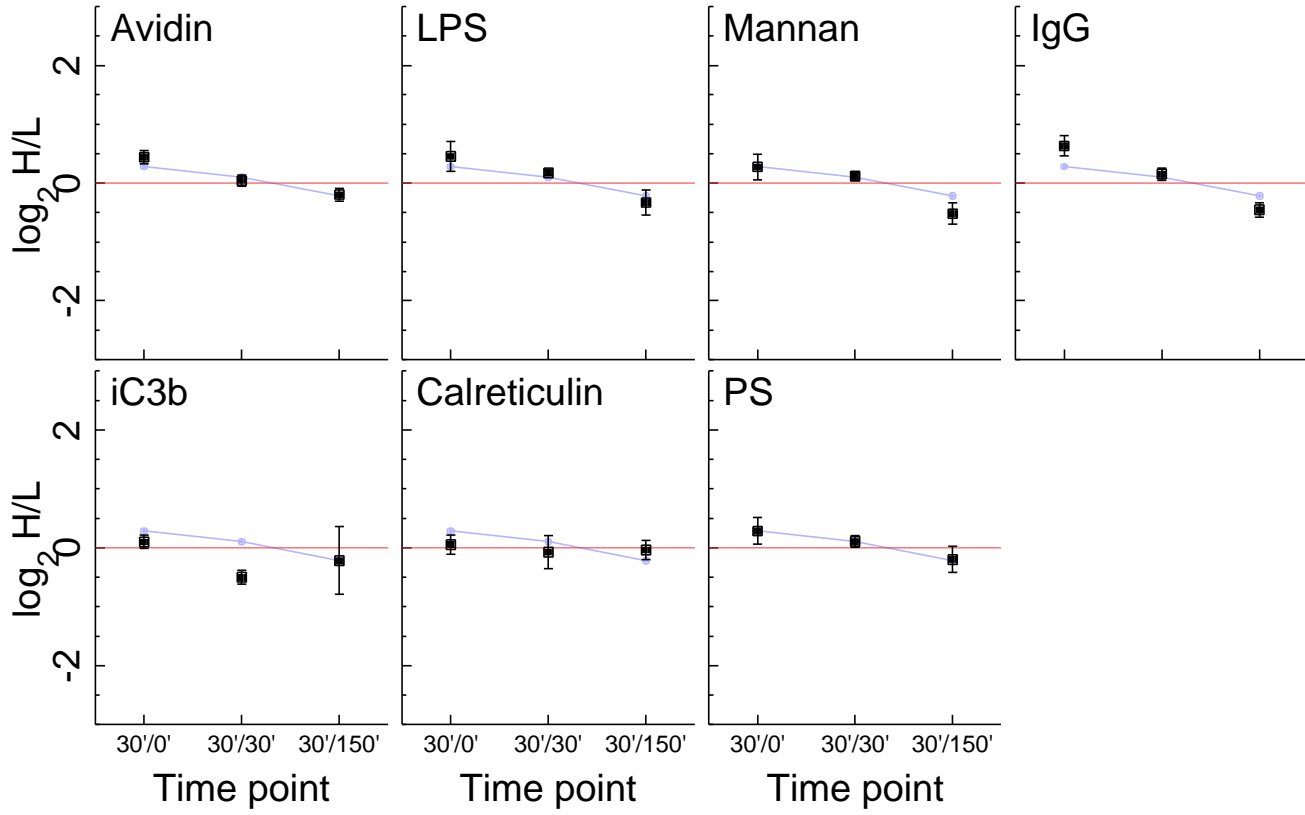

### tlr3 (Q99MB1)

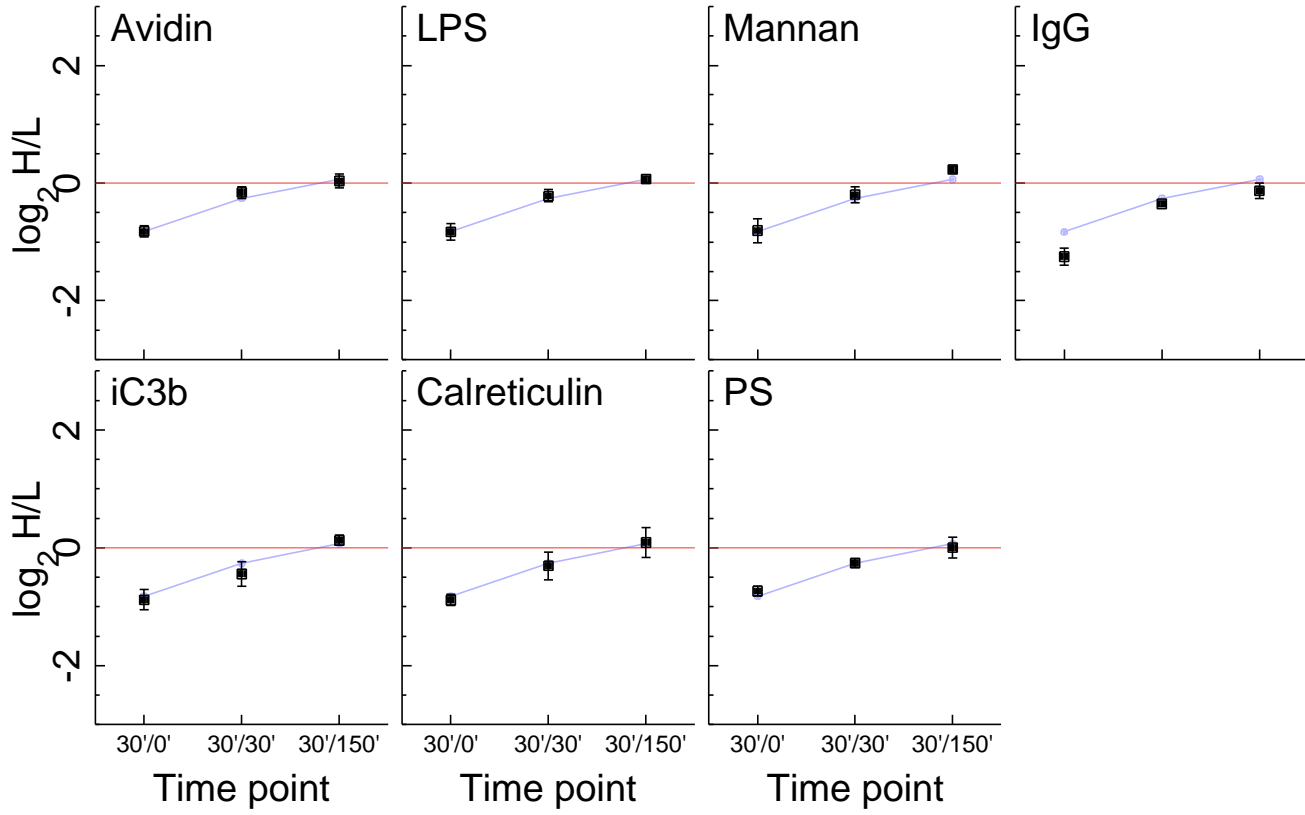

tlr7 (P58681)

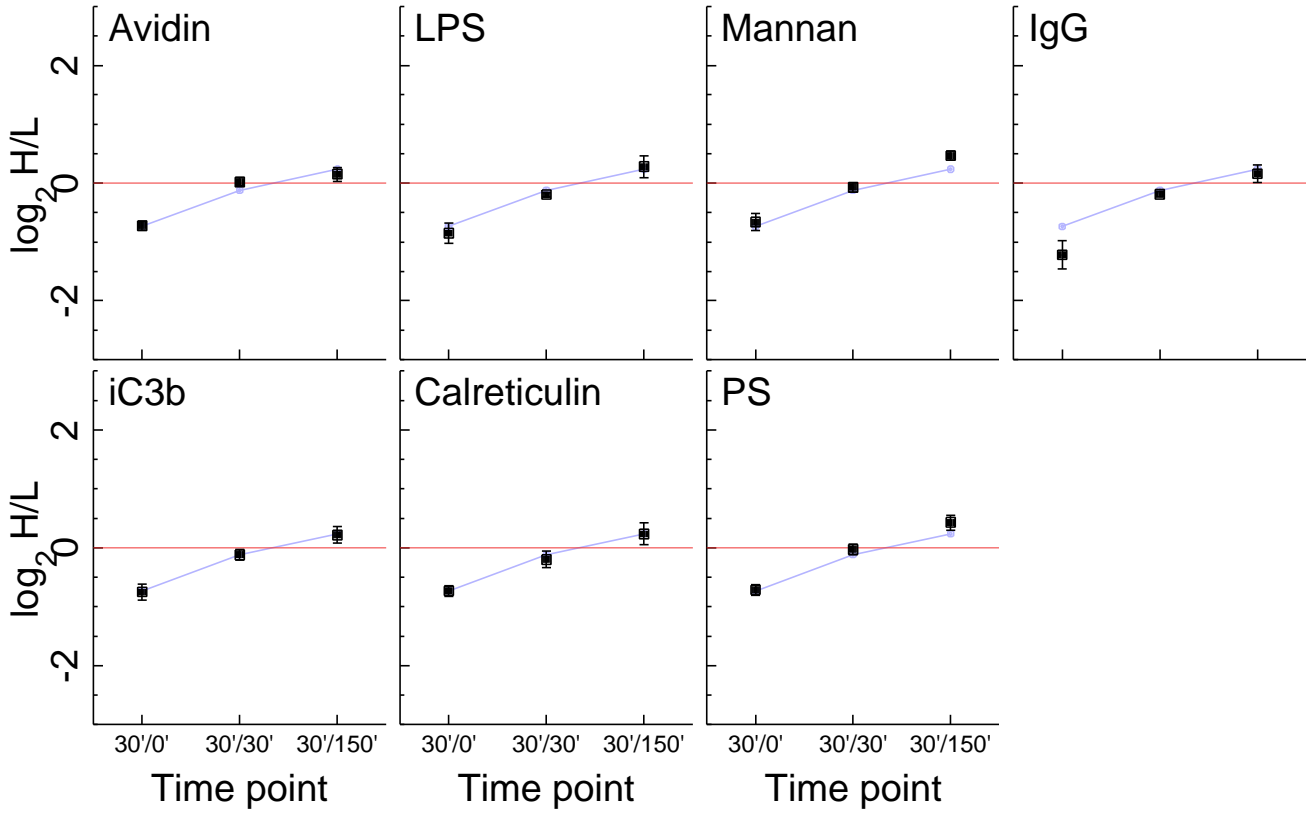

### tlr8 (P58682)

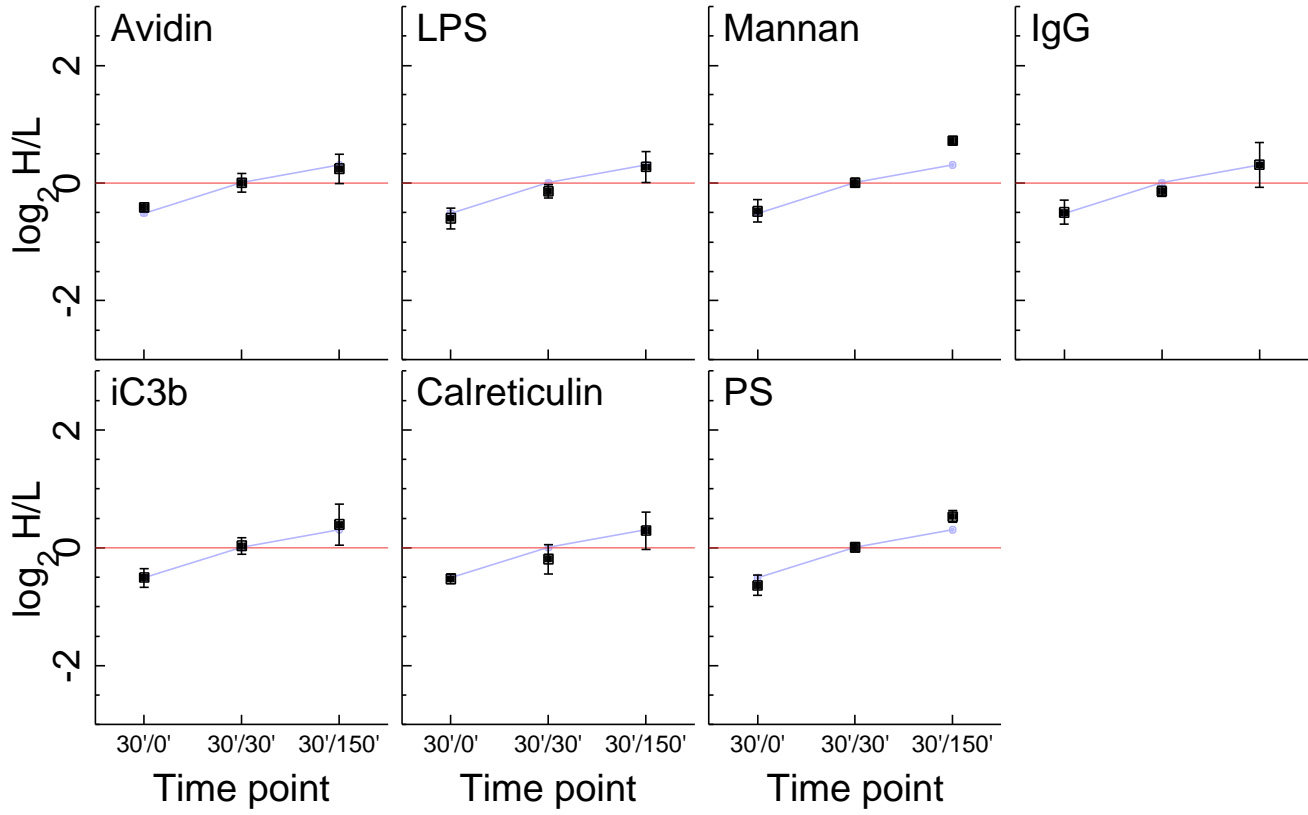



tlr9 (Q9EQU3)

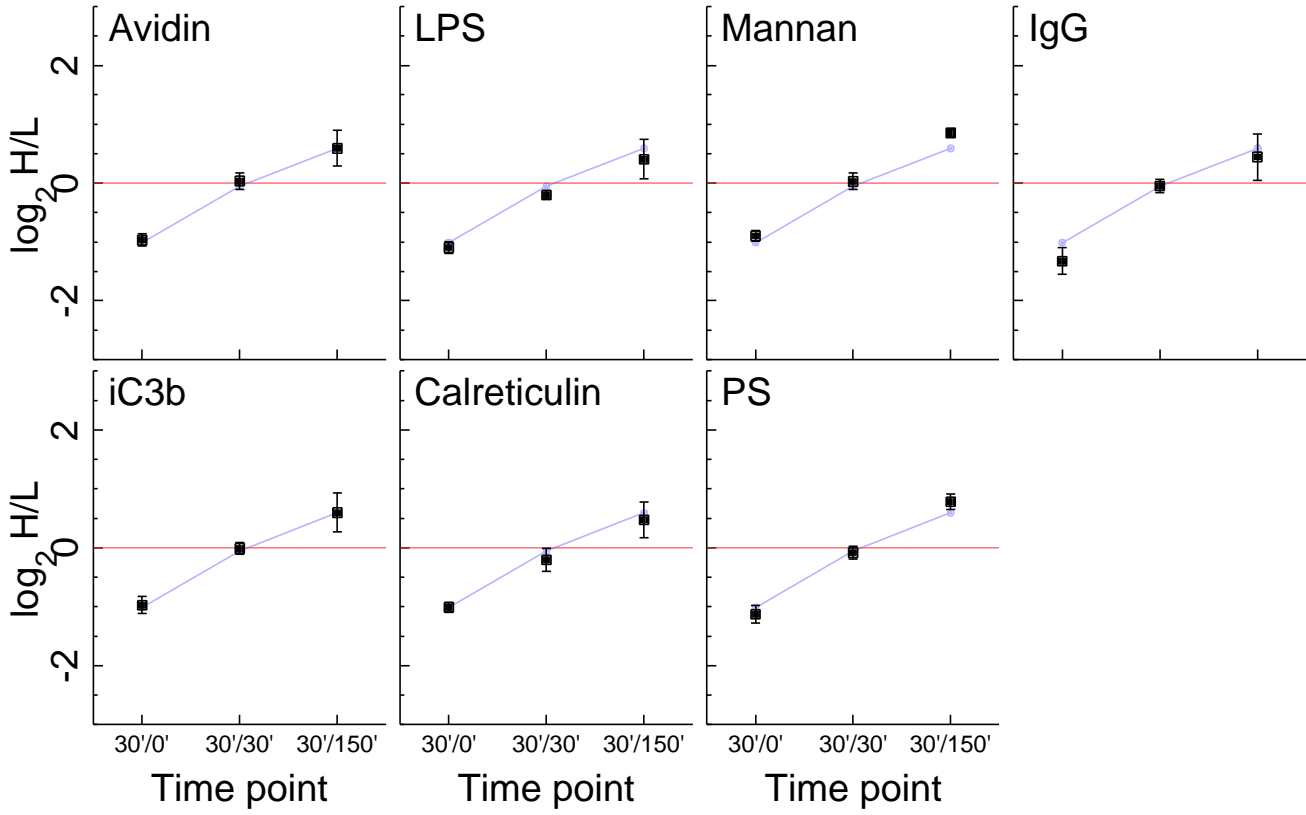

tm7sf3 (Q9CRG1)

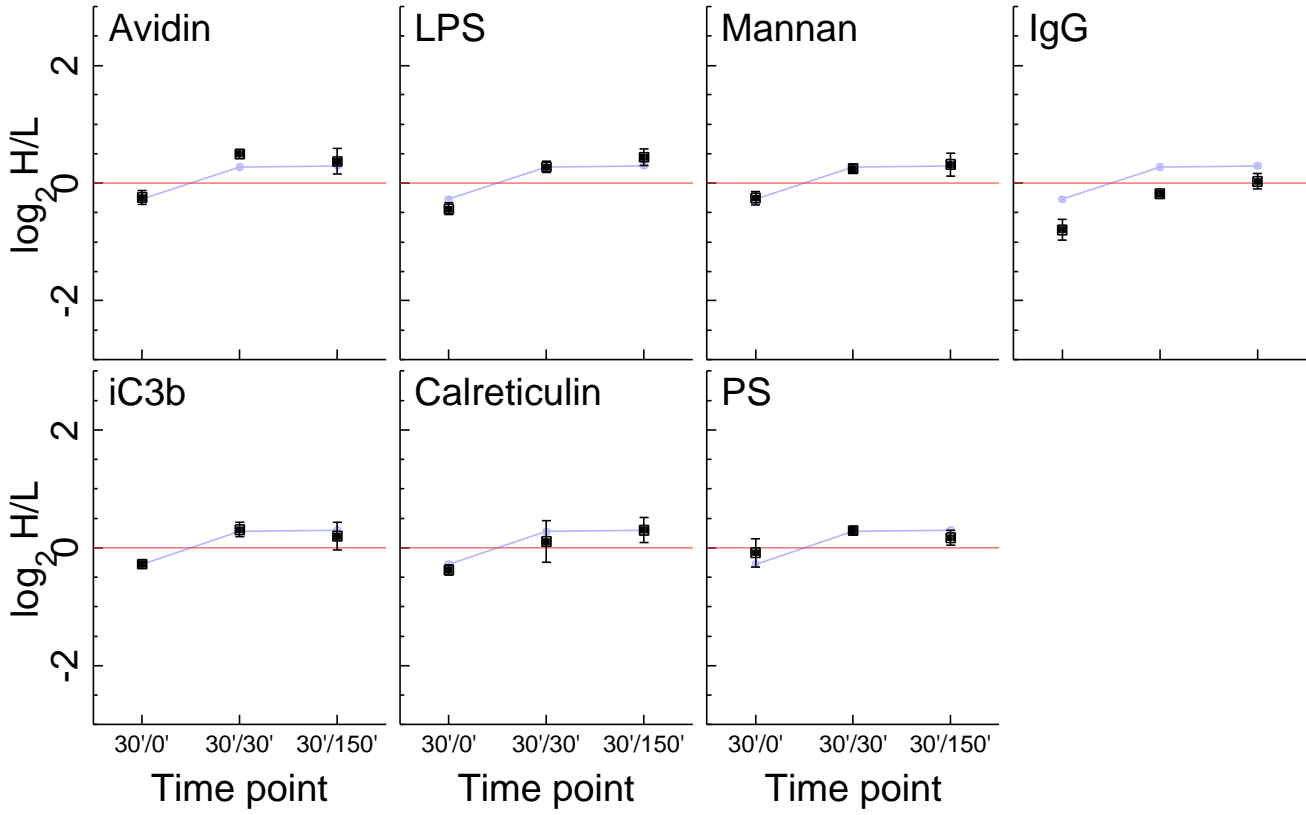

tm9sf1 (Q9DBU0)

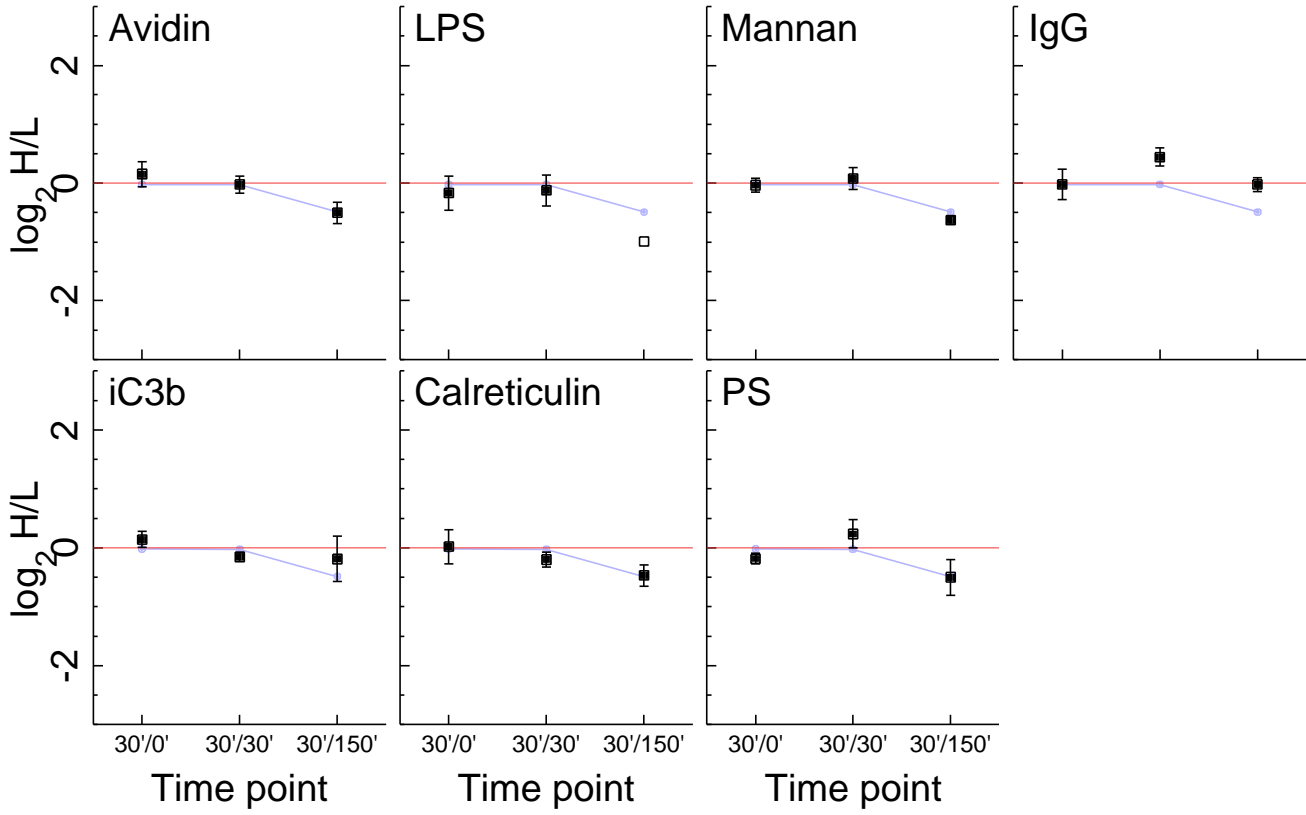

tm9sf2 (P58021)

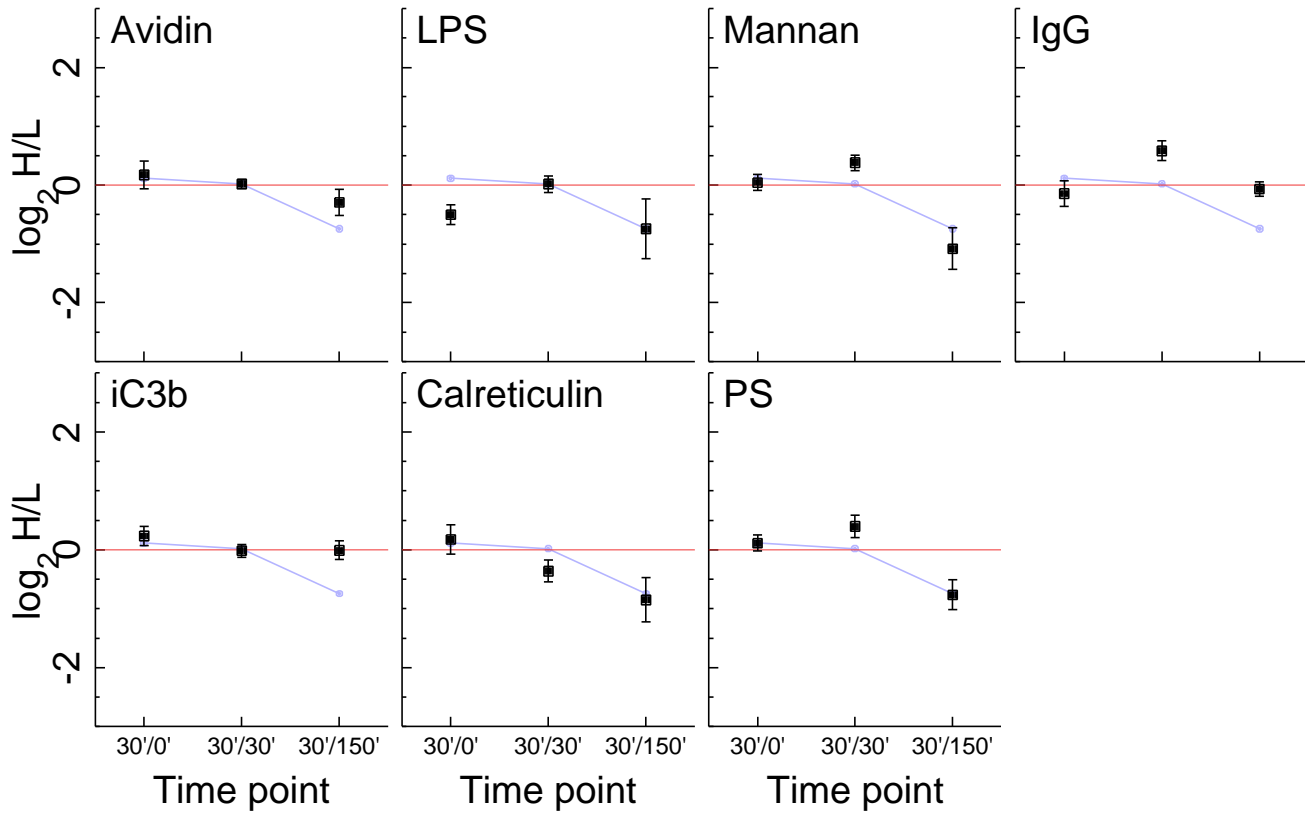

tm9sf3 (Q9ET30)

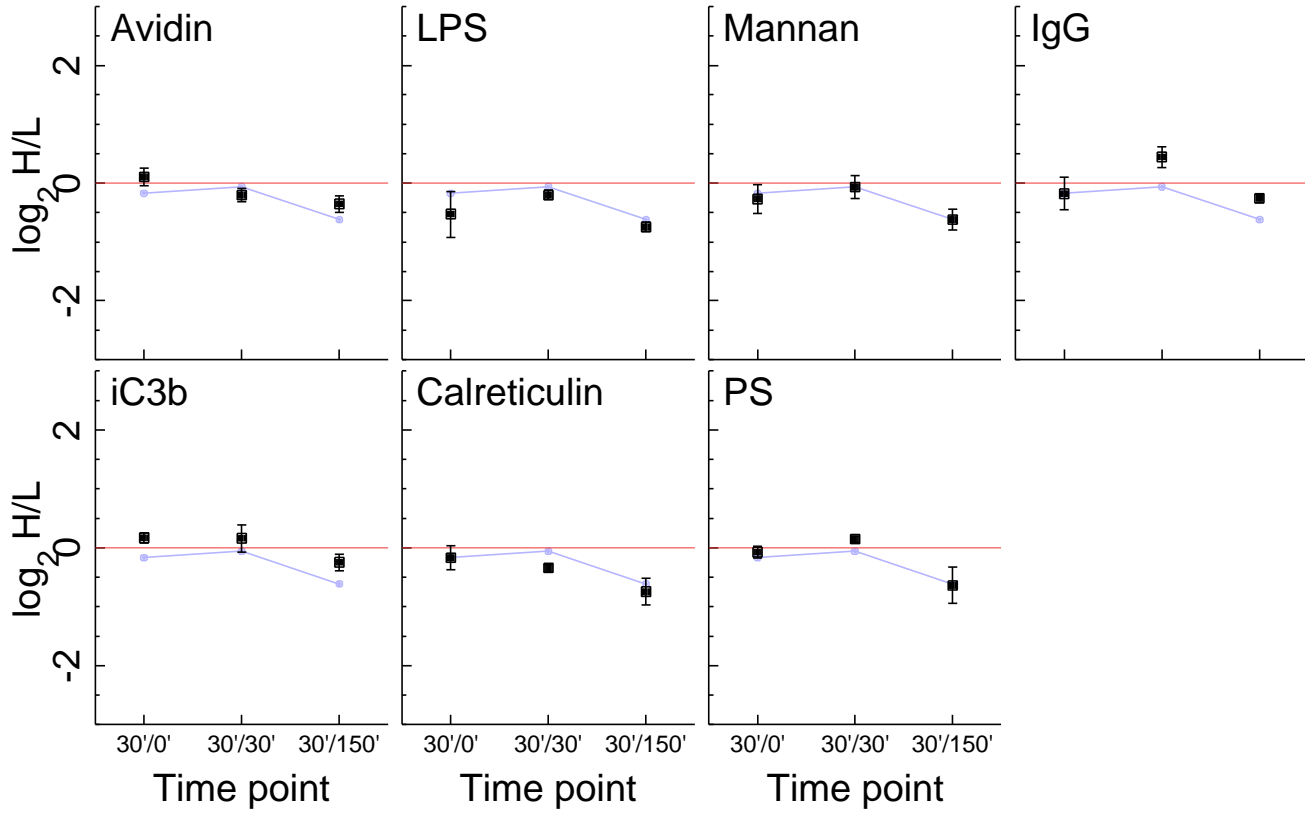

tm9sf4 (Q8BH24)

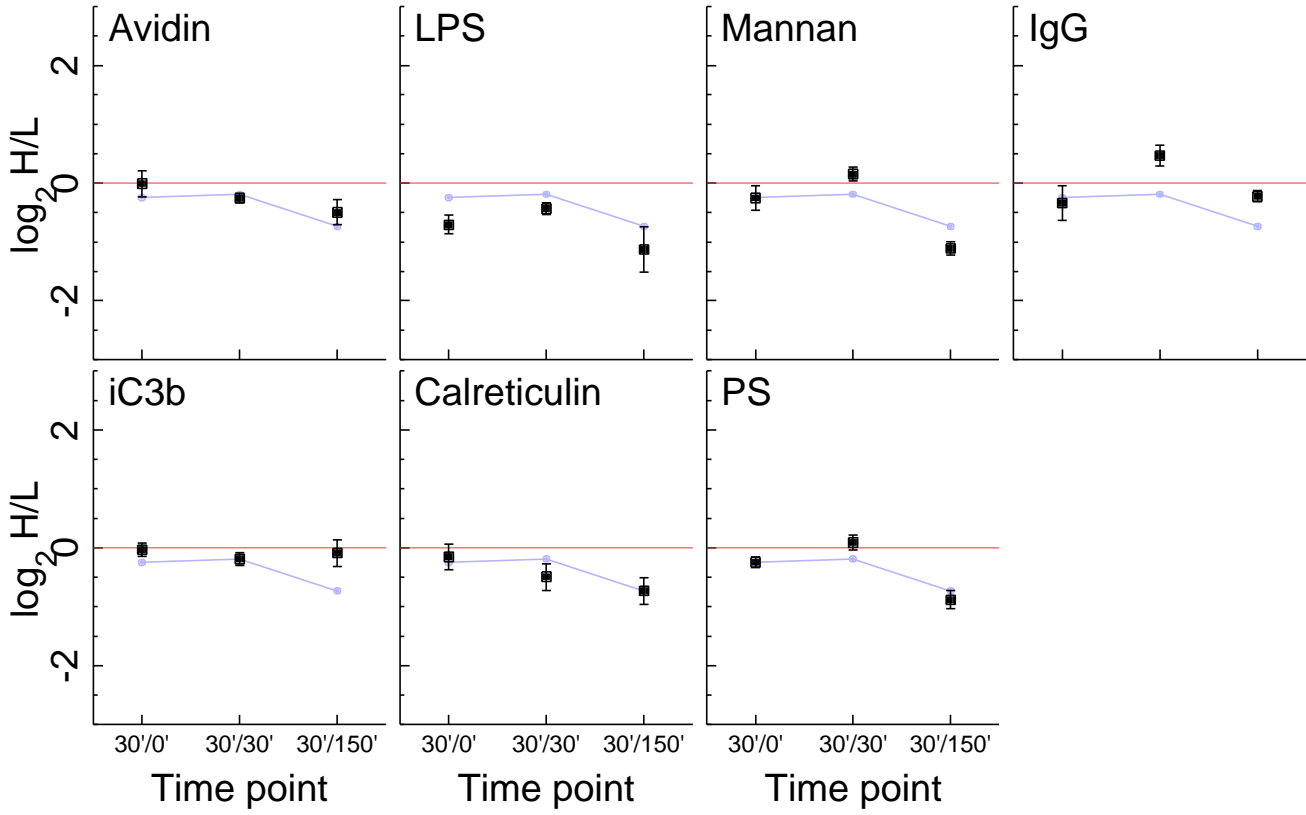

tmco1 (Q921L3)

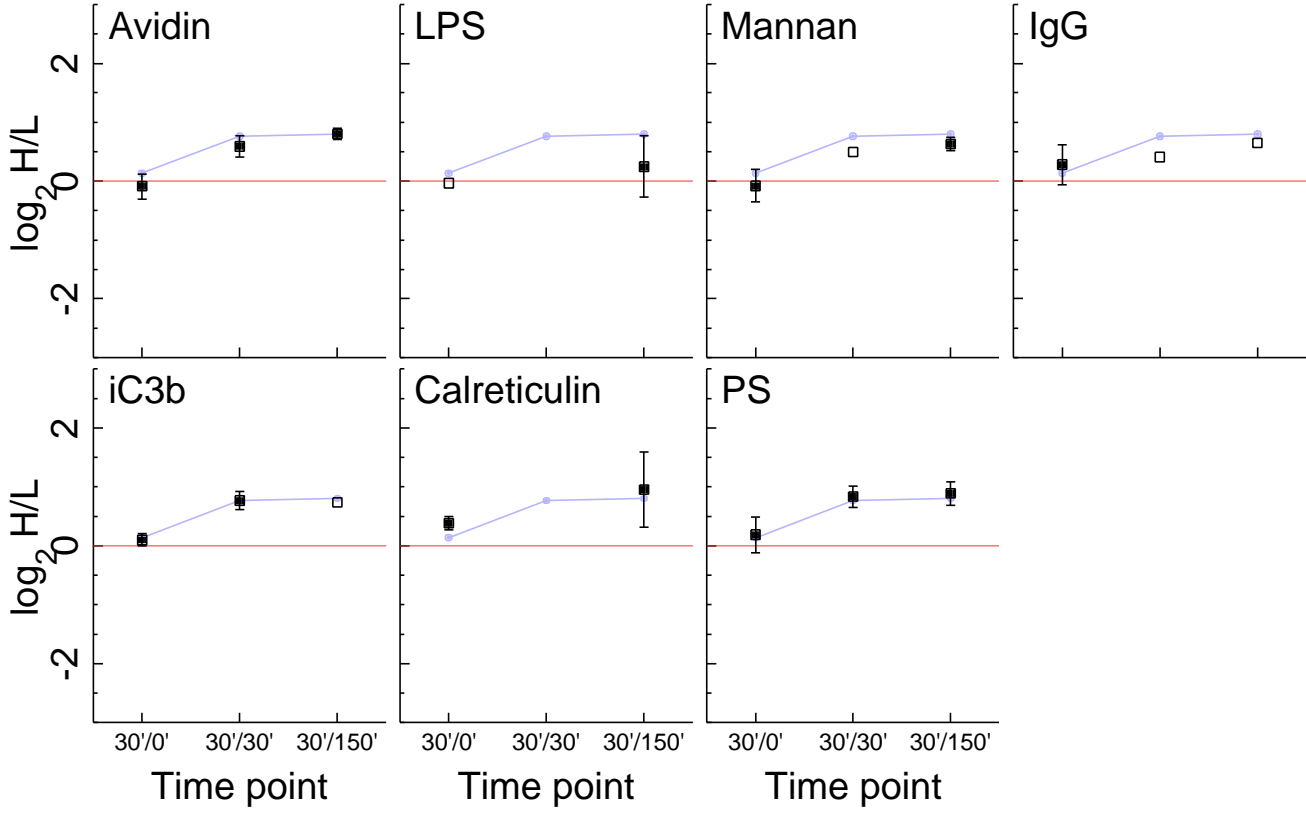

tmed10 (Q9D1D4)

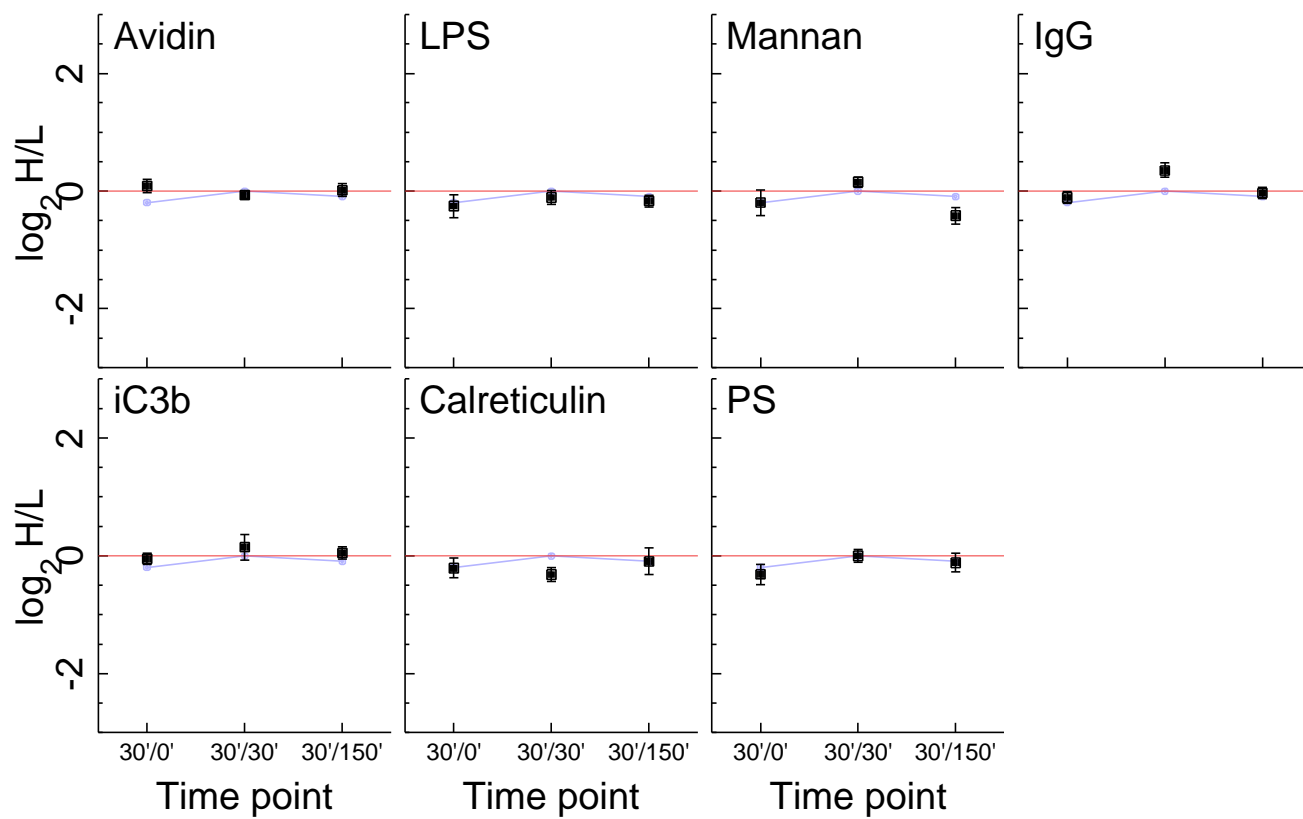



### tmed2 (Q9R0Q3)

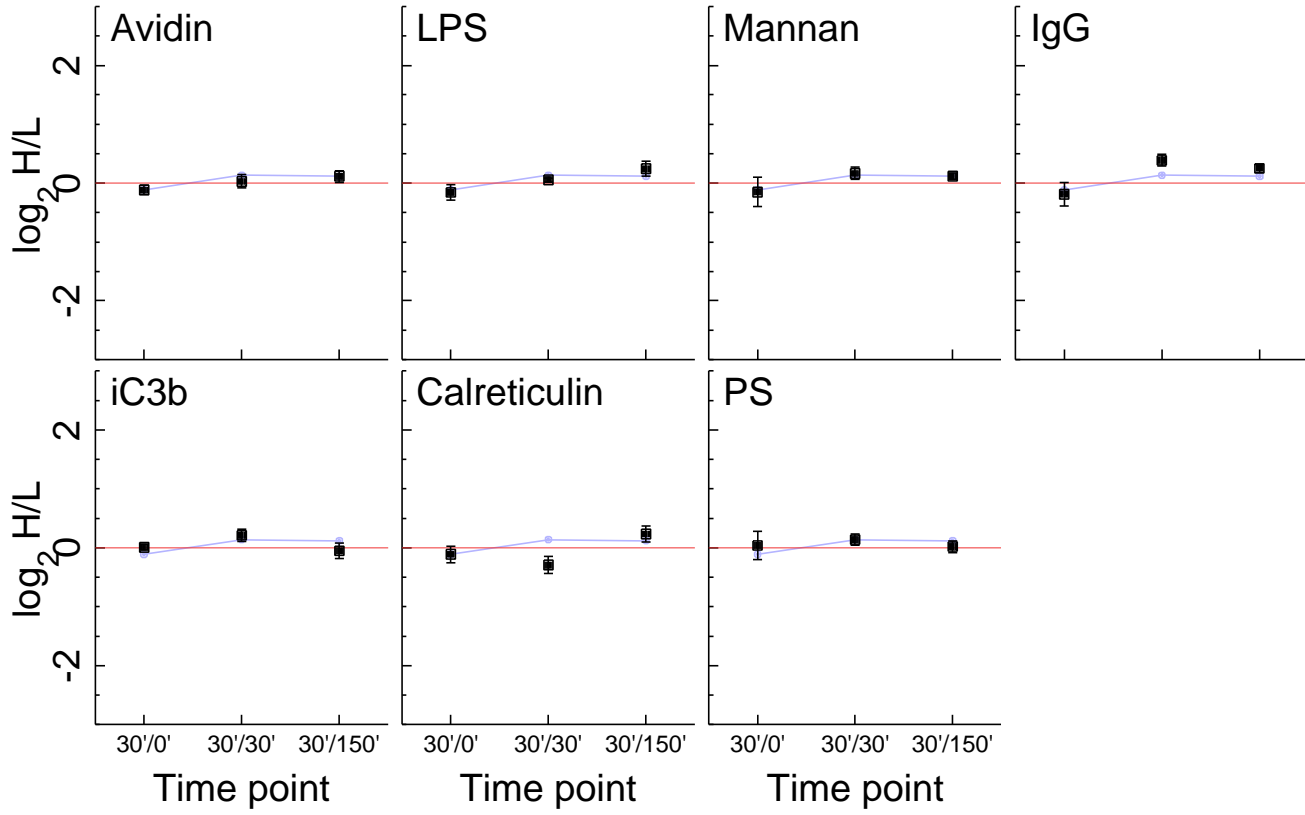

tmed4 (Q8R1V4)

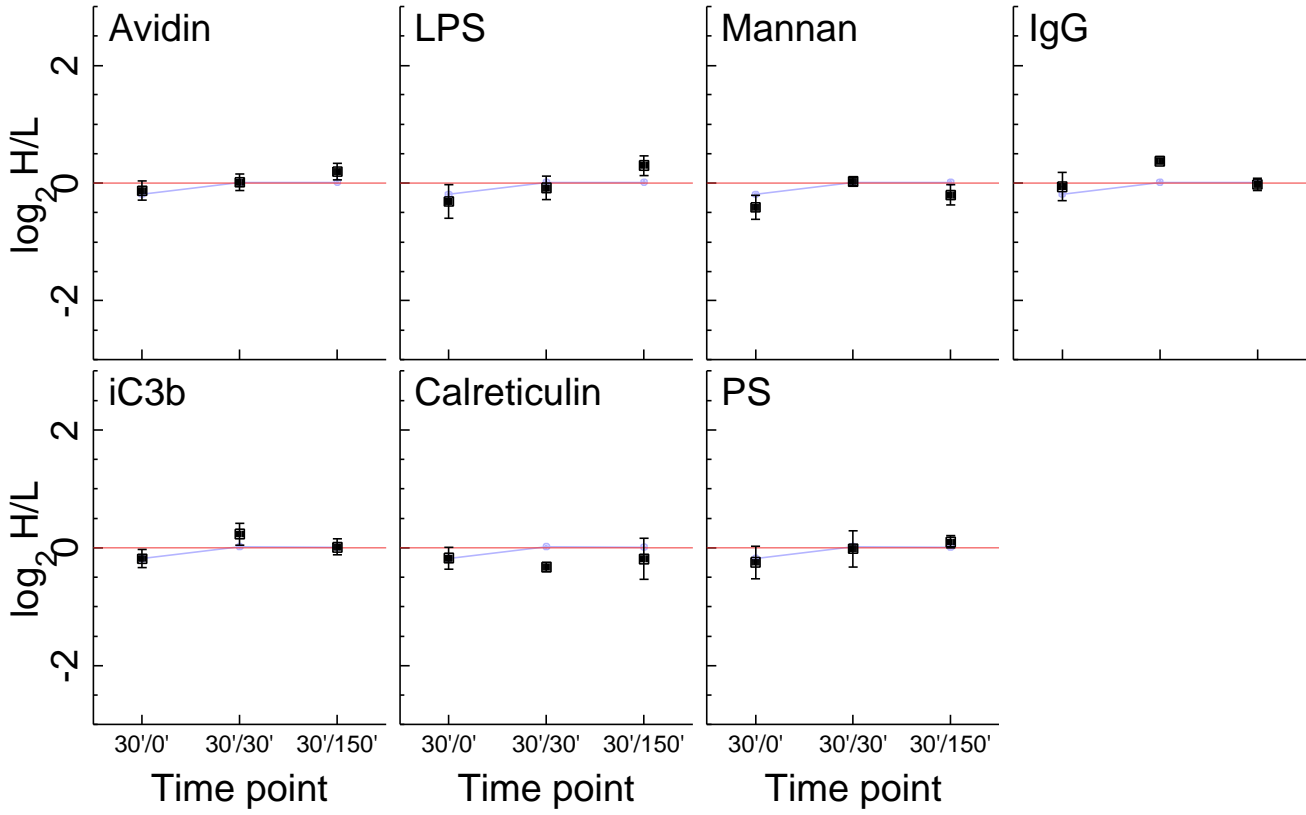

### tmed5 (Q9CXE7)

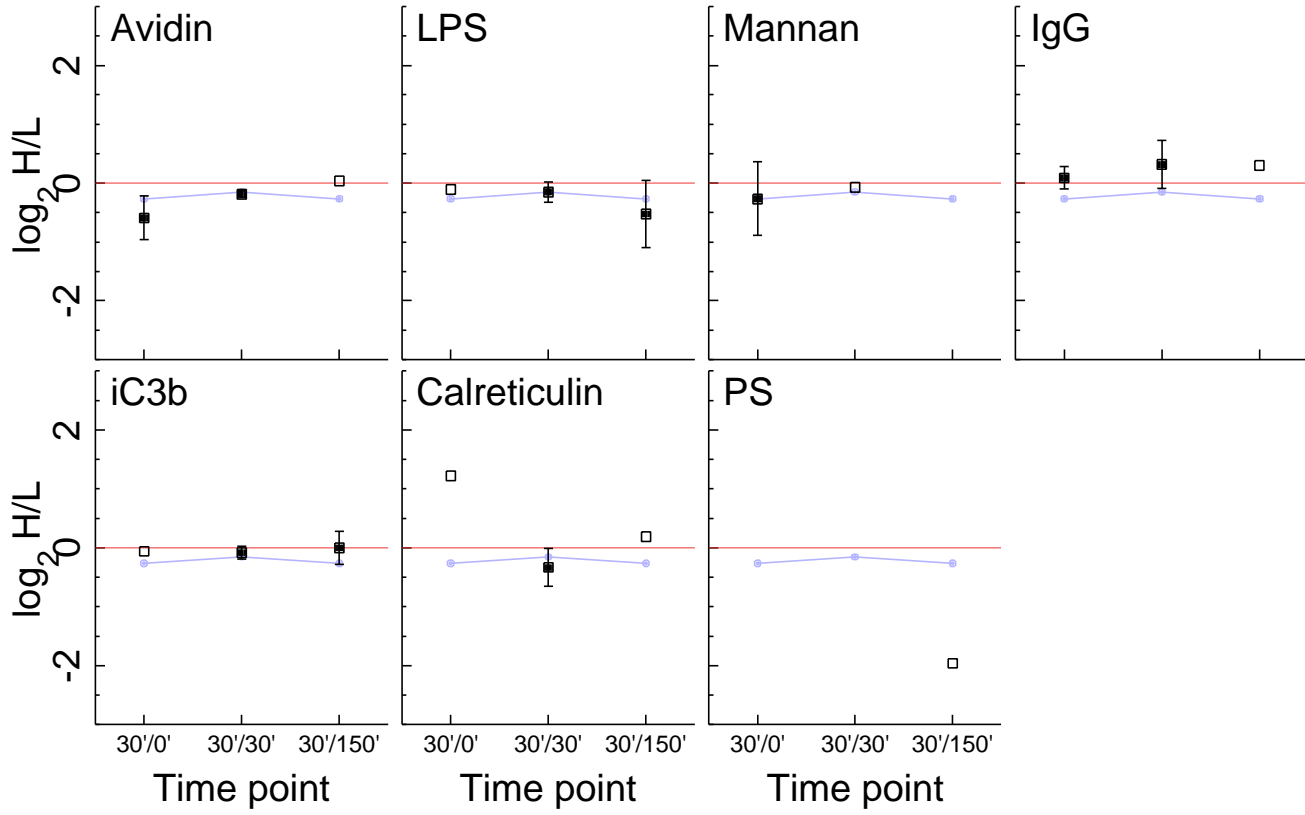

tmed7 (D3YZZ5)

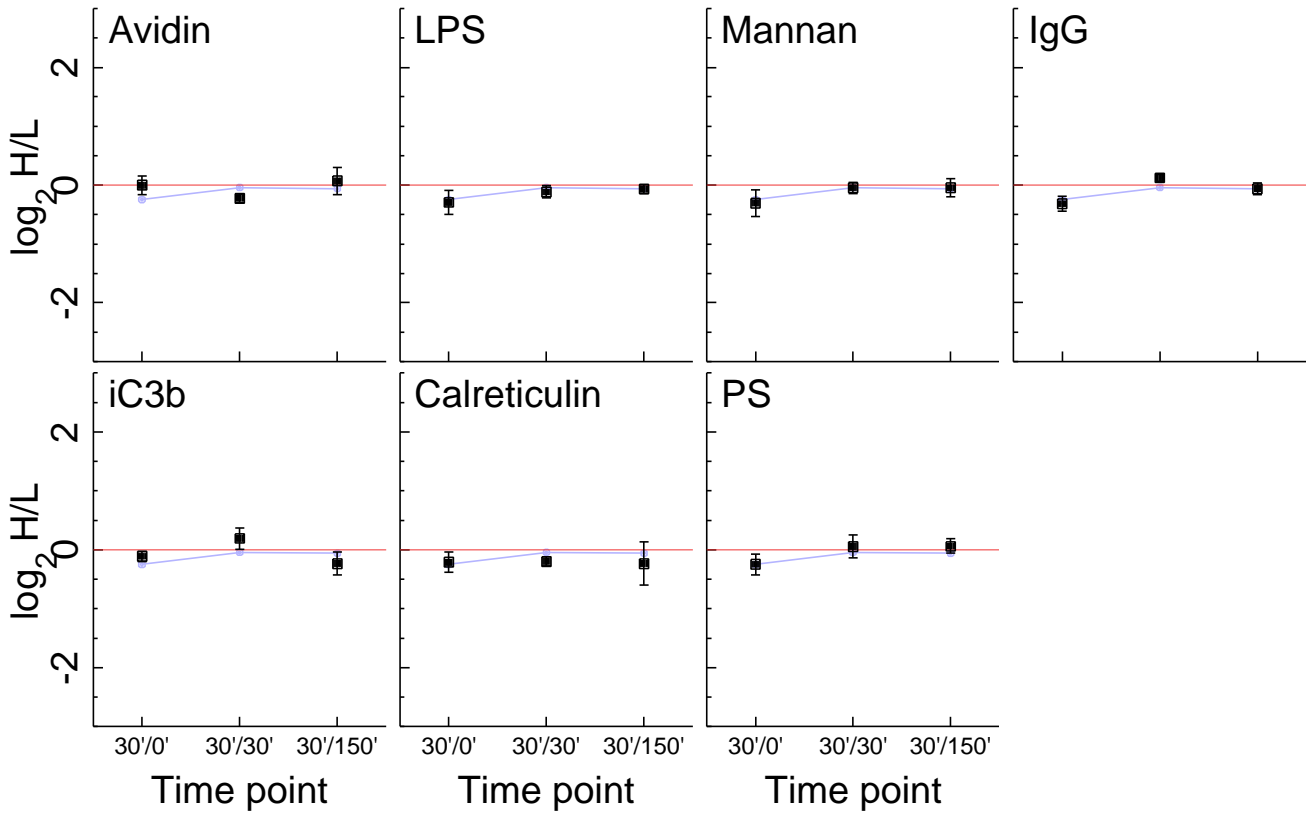

tmed9 (Q99KF1)

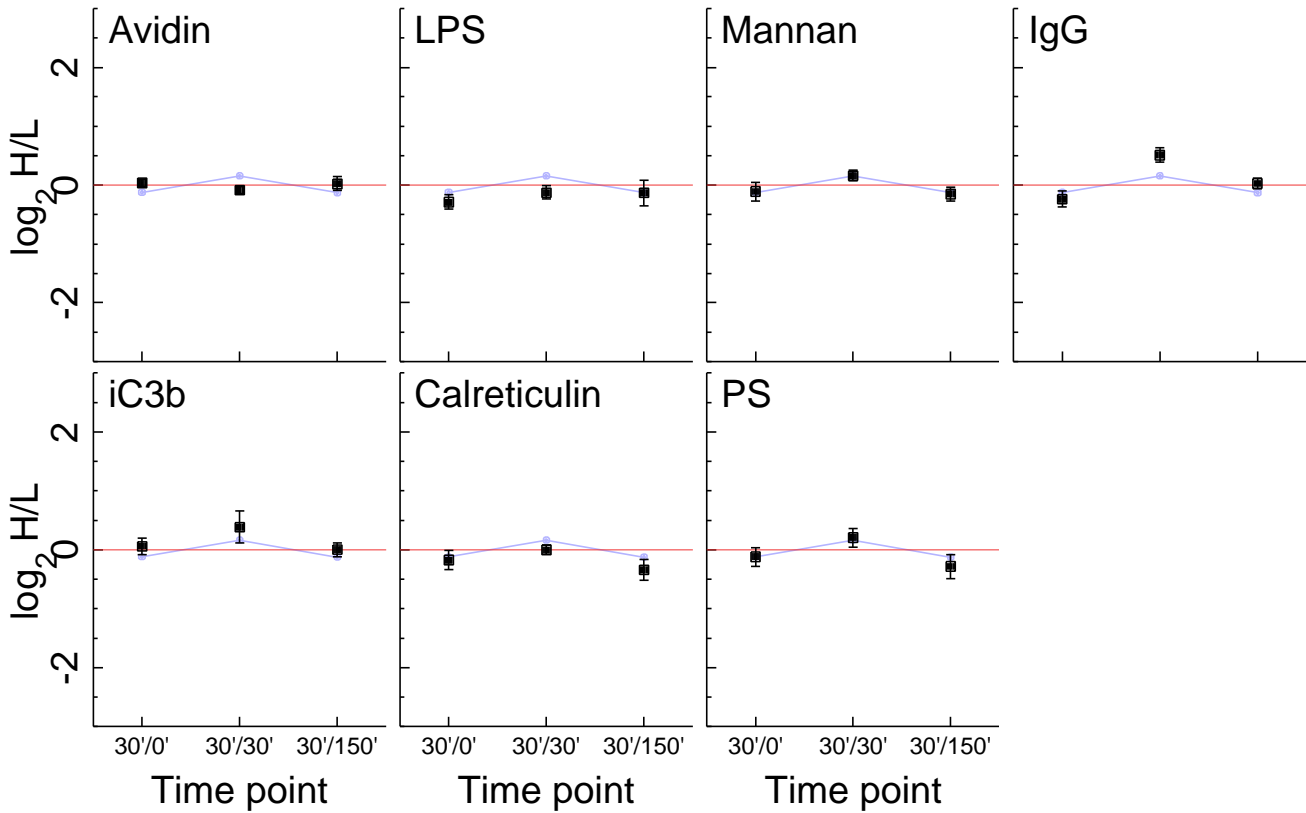

tmem104 (Q3TB48)

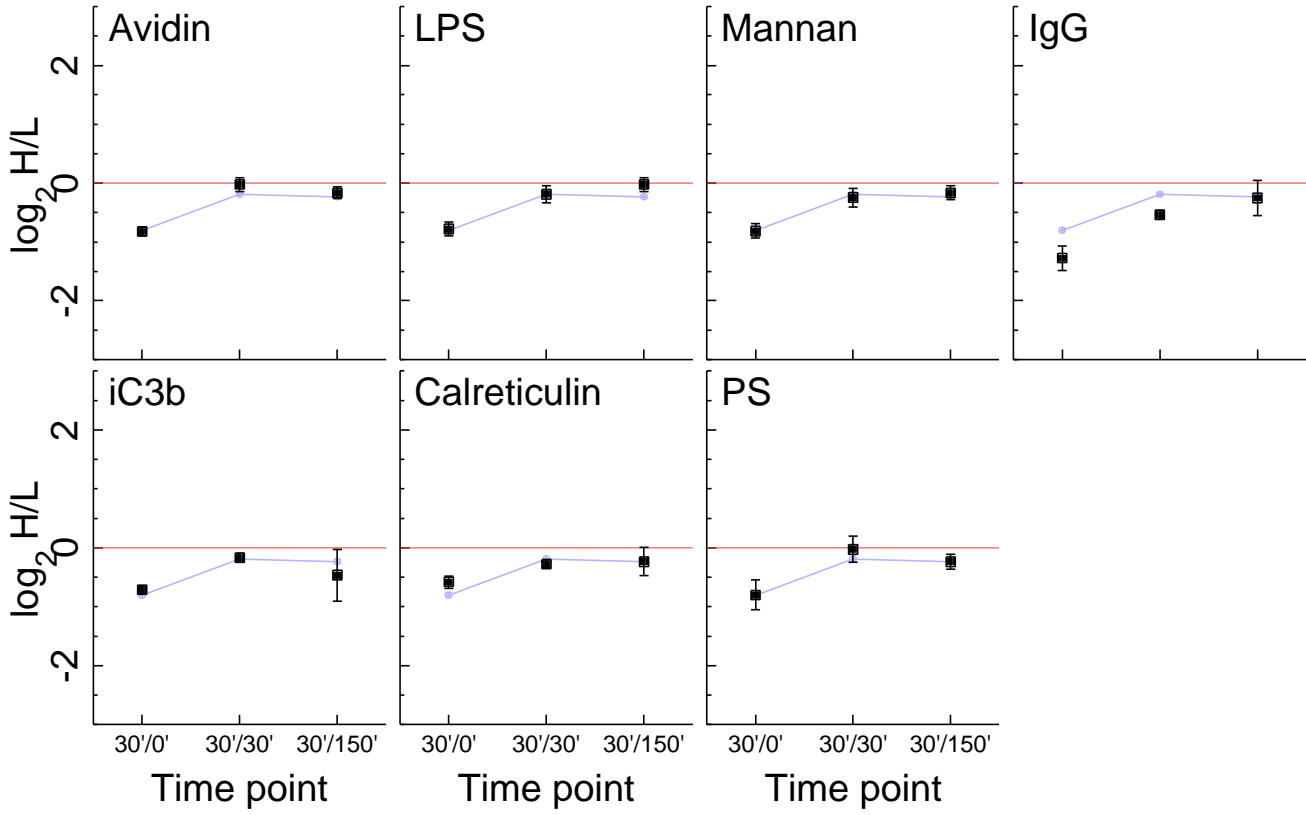

tmem106a (Q8VC04)

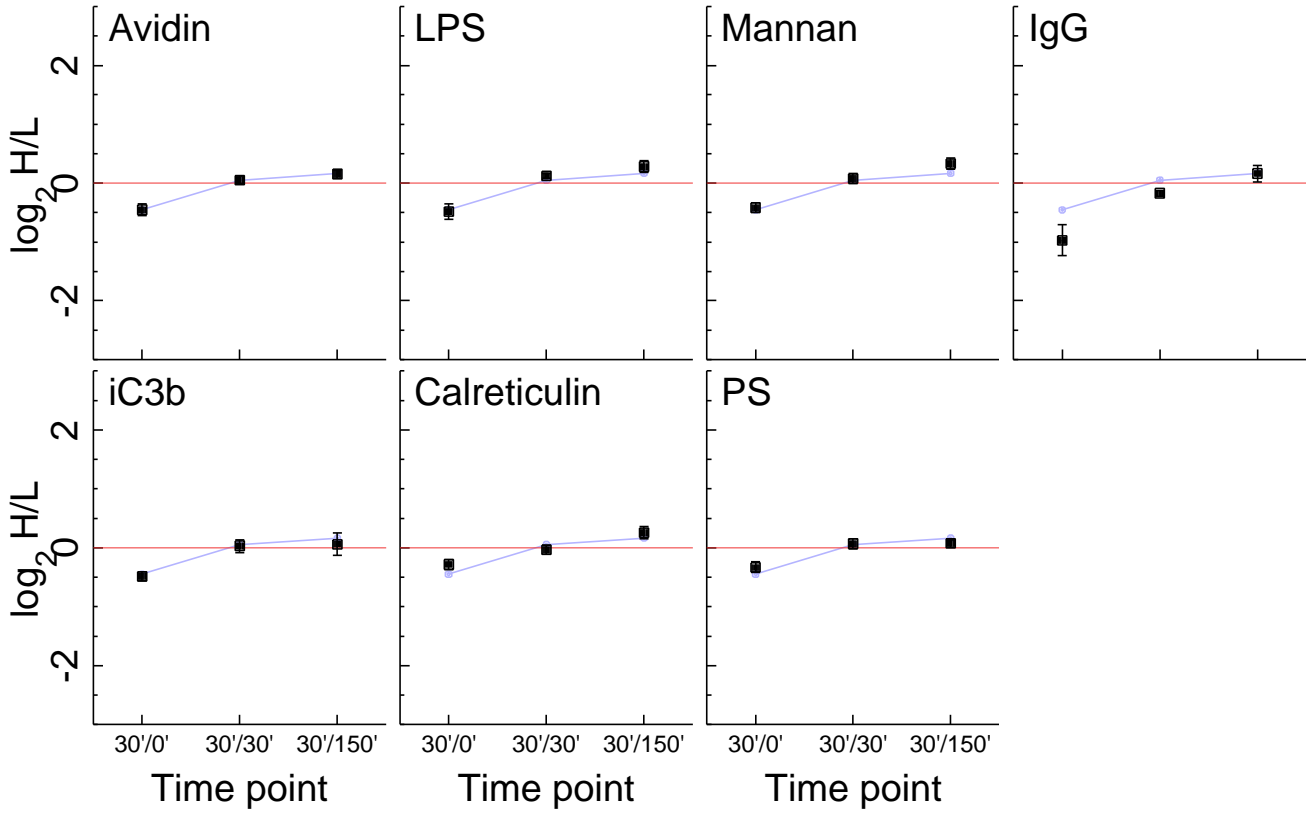

tmem106b (Q80X71)

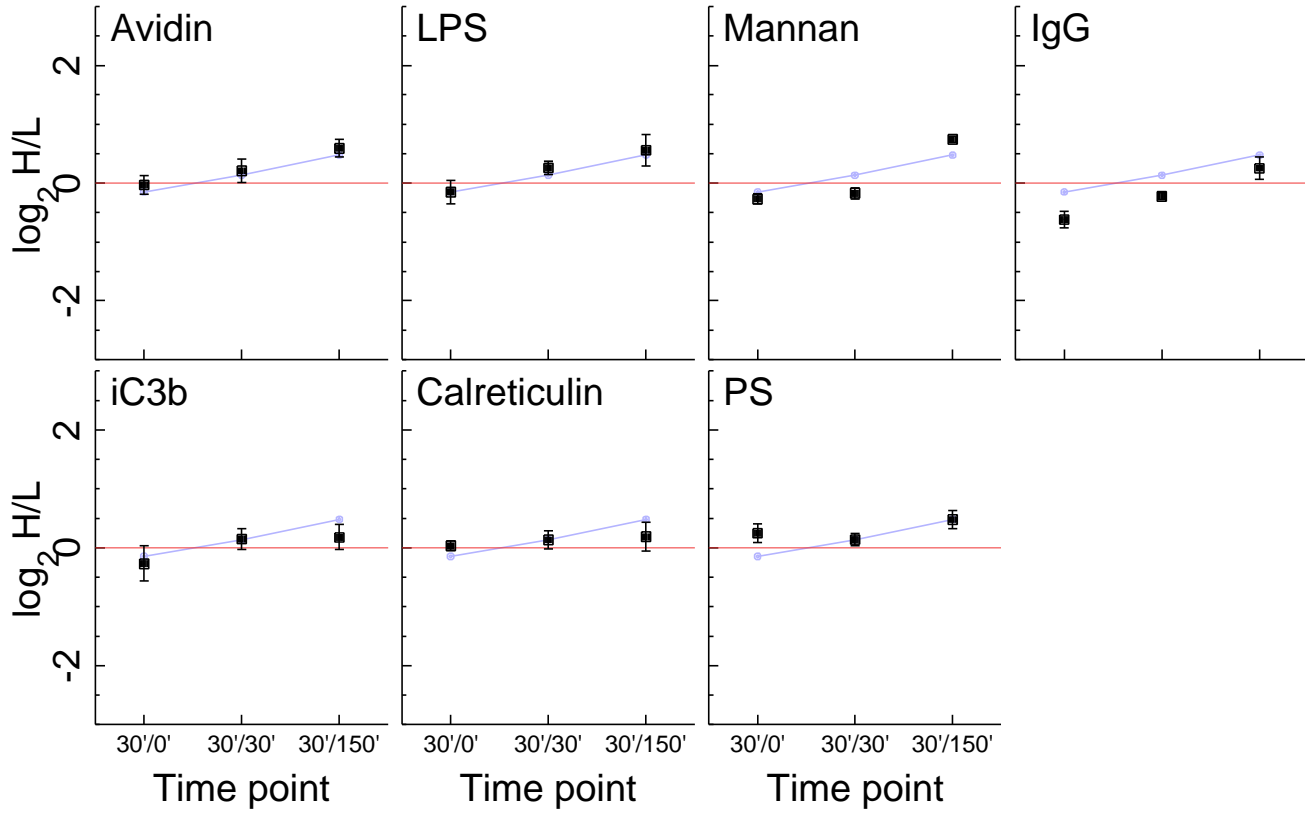



tmem106c (Q80VP8)

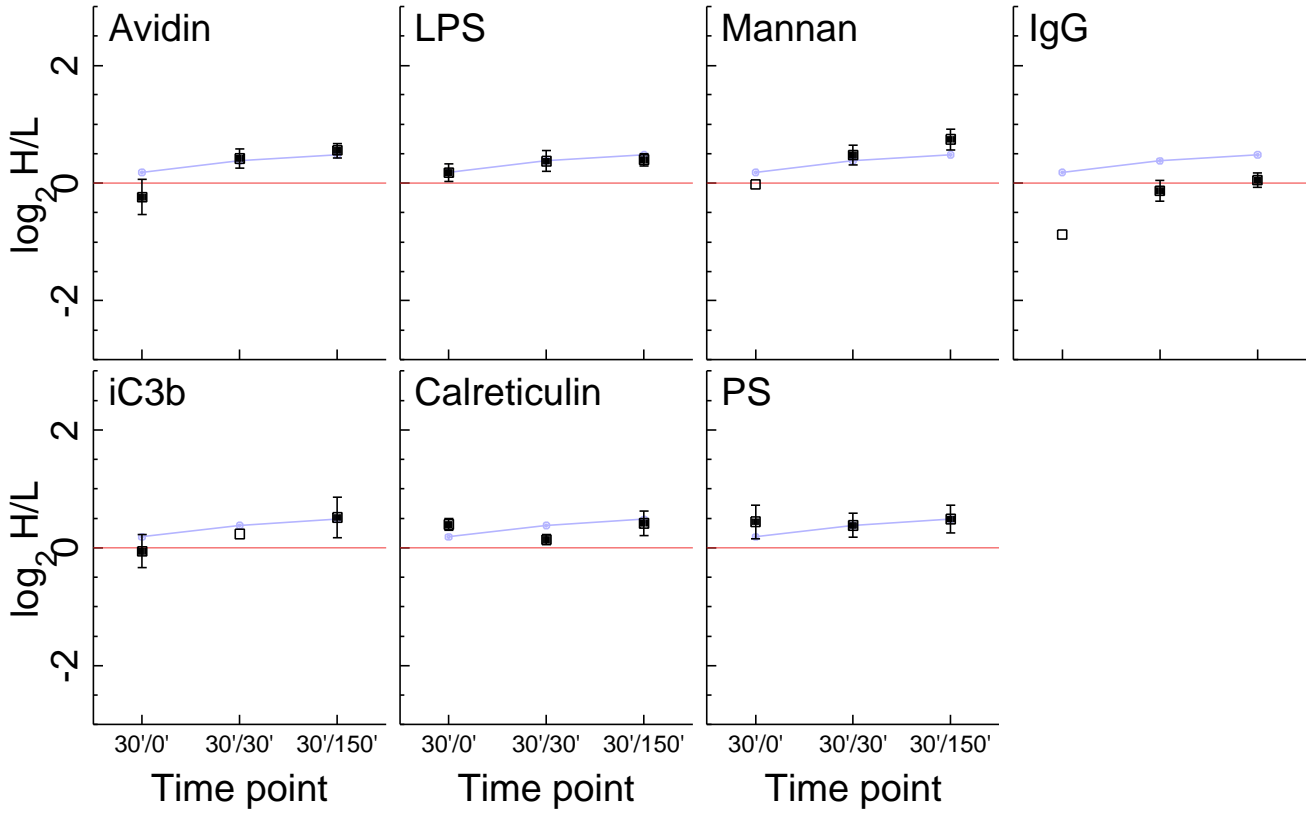

tmem109 (Q3UBX0)

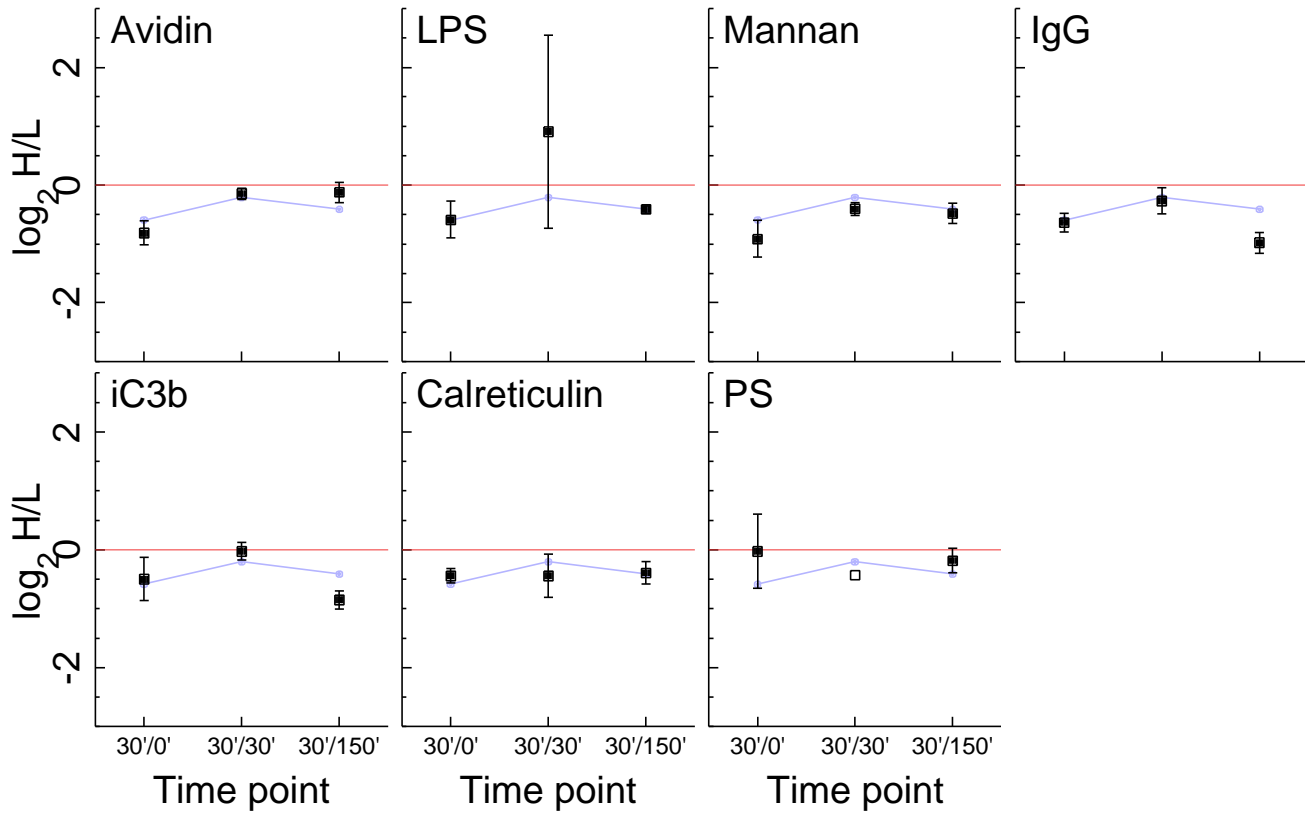

tmem120a (Q8C1E7)

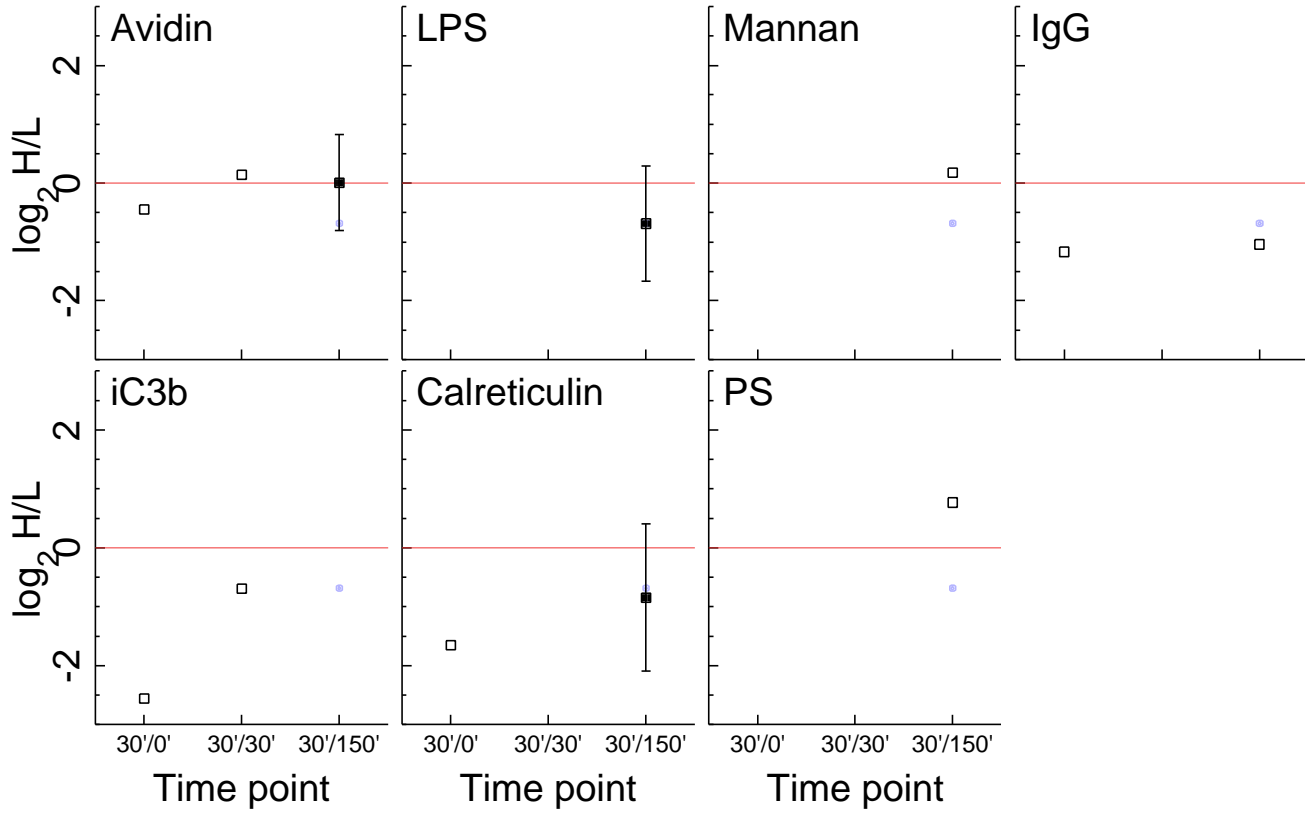

### tmem144 (Q8VEH0)

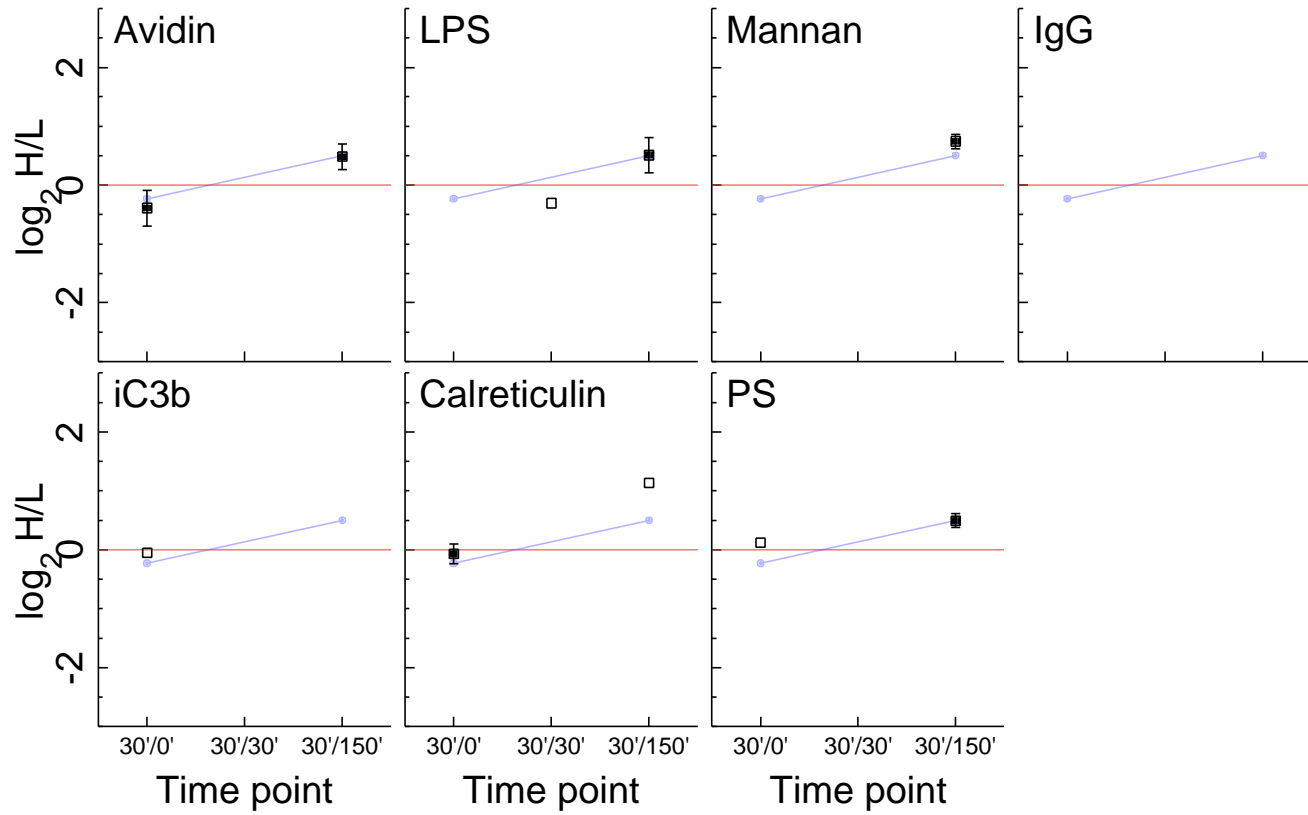

tmem14c (Q9CQN6)

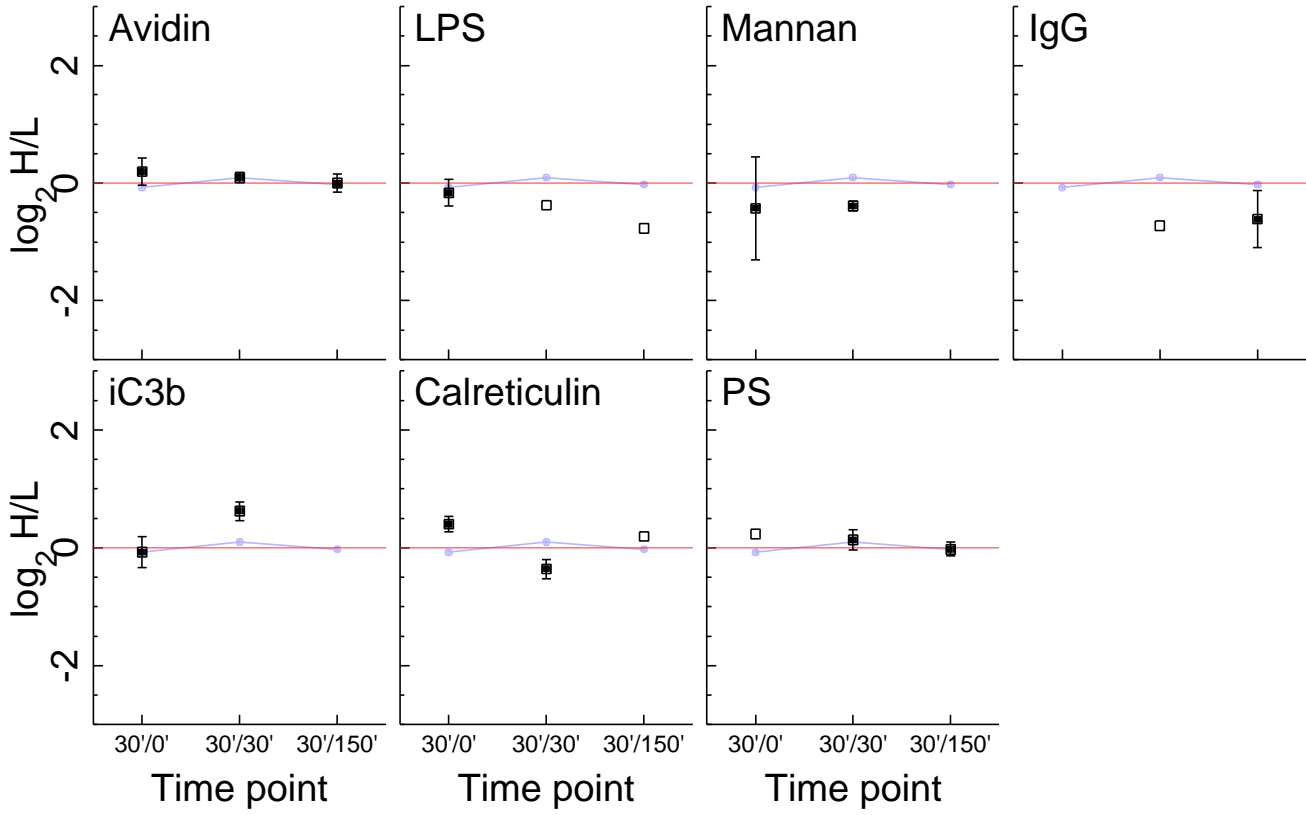

tmem165 (P52875)

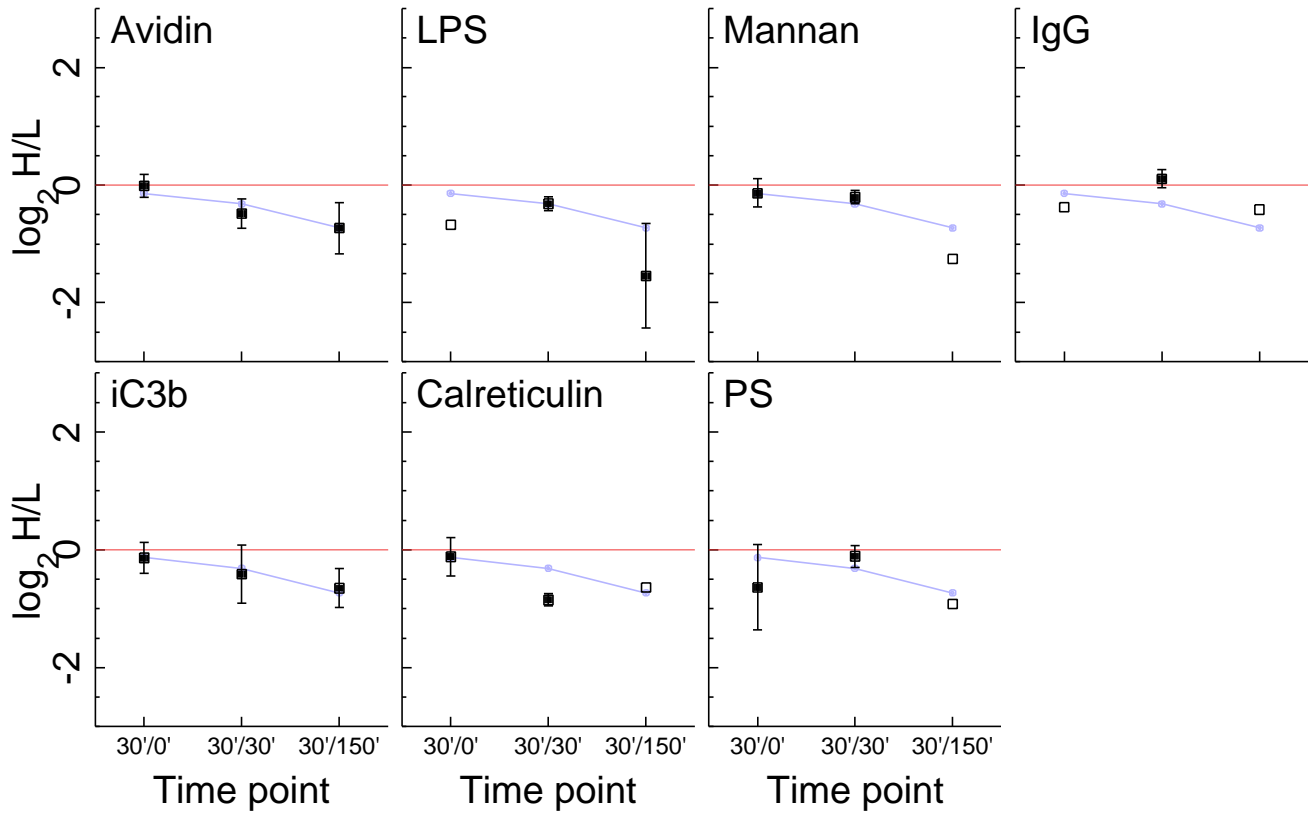

### tmem173 (Q3TBT3)

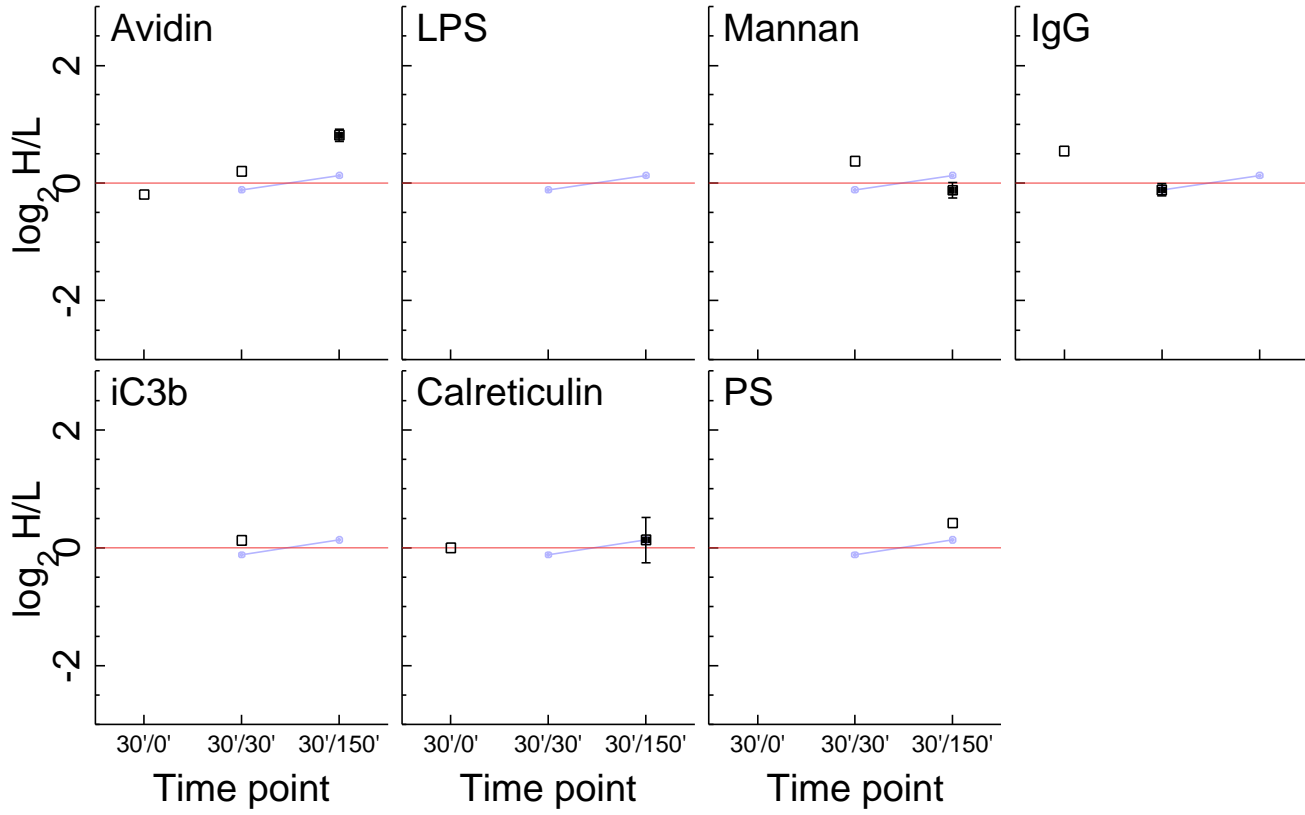

### tmem175 (Q9CXY1)

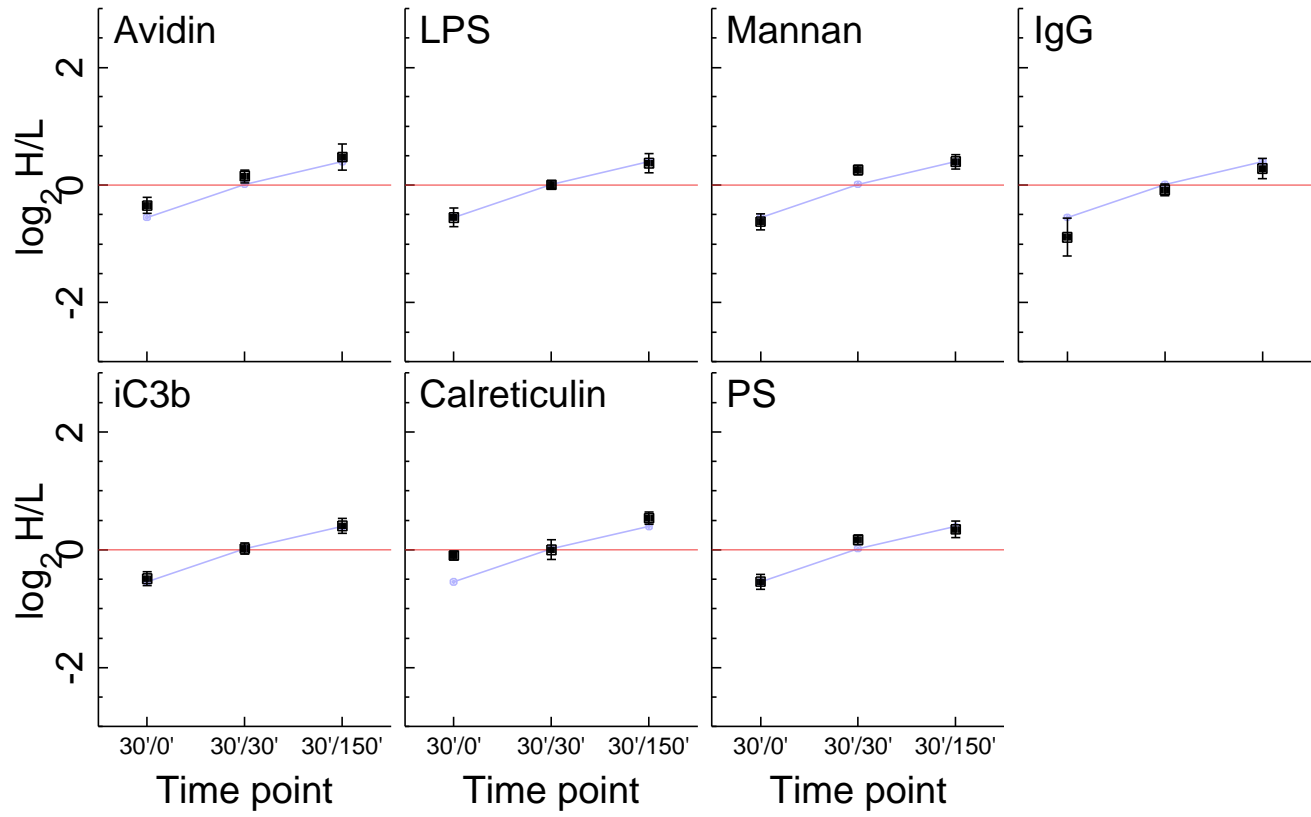



tmem176b (Q9R1Q6)

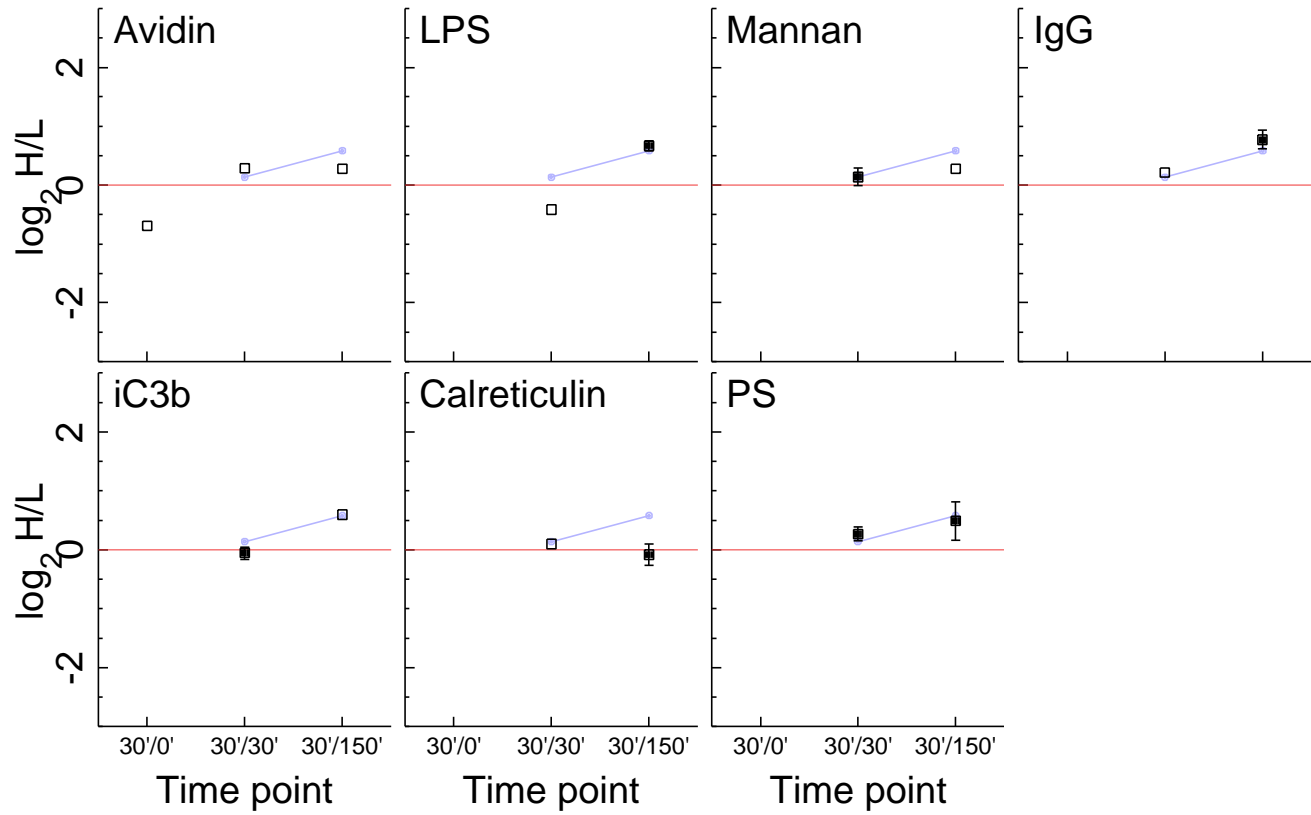

tmem179b (Q9CY24)

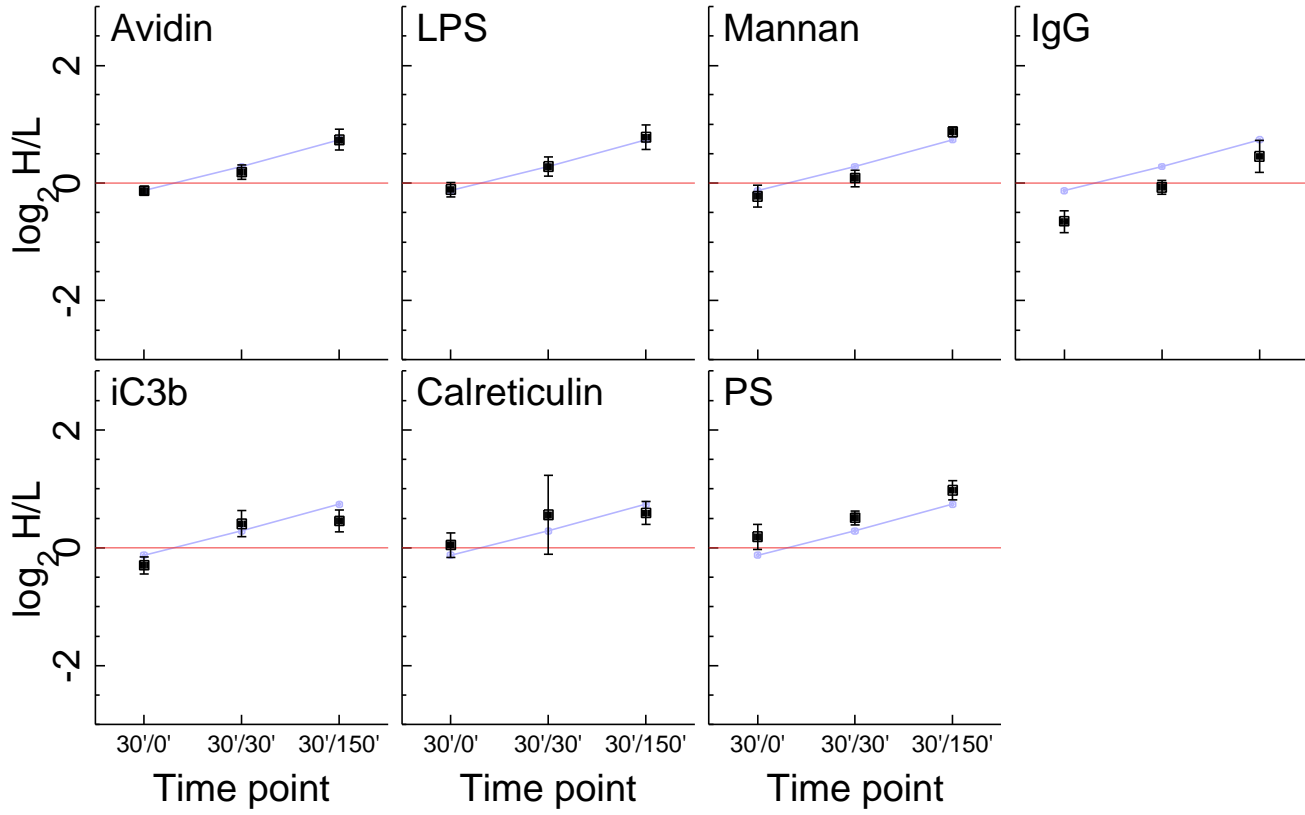

### tmem192 (Q9CXT7)

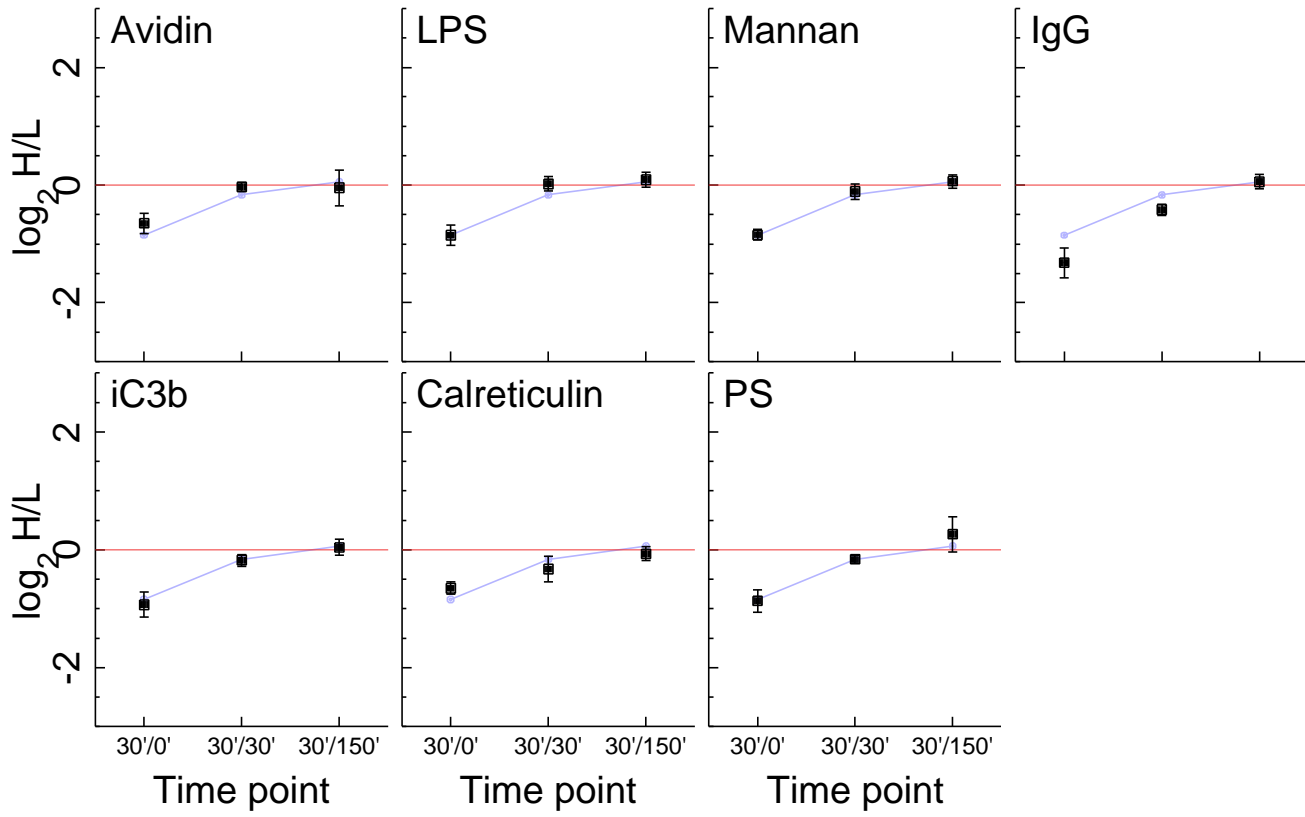

tmem206 (Q9D771)

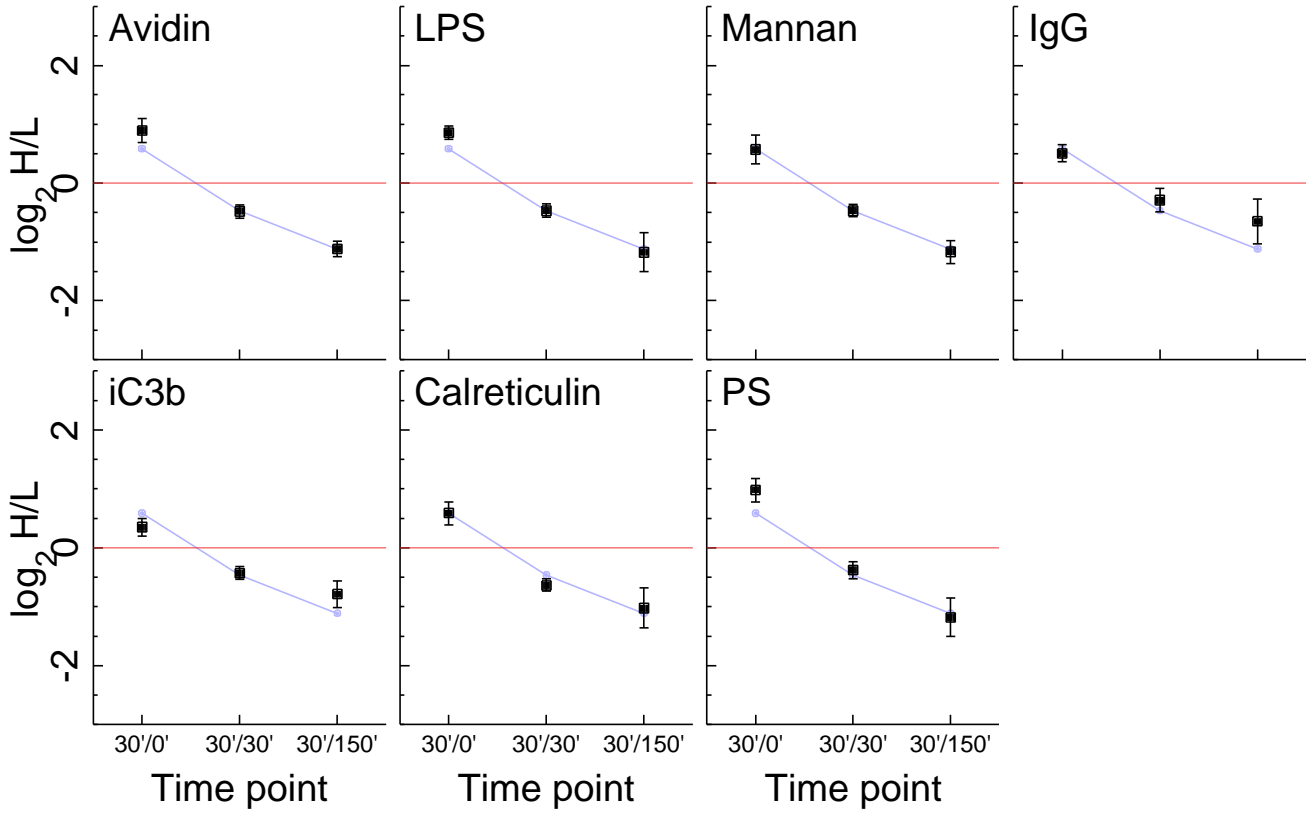

tmem30a (Q8VEK0)

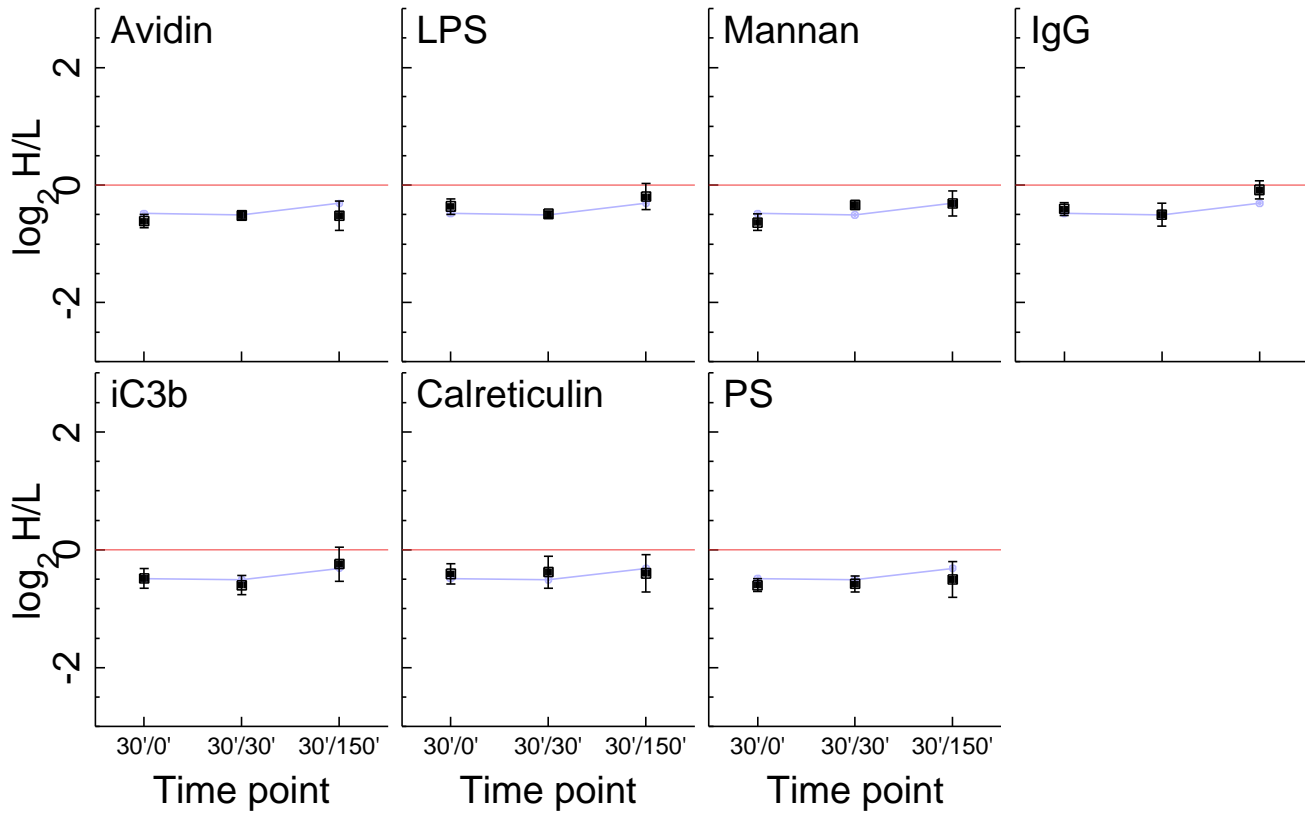

### tmem43 (Q9DBS1)

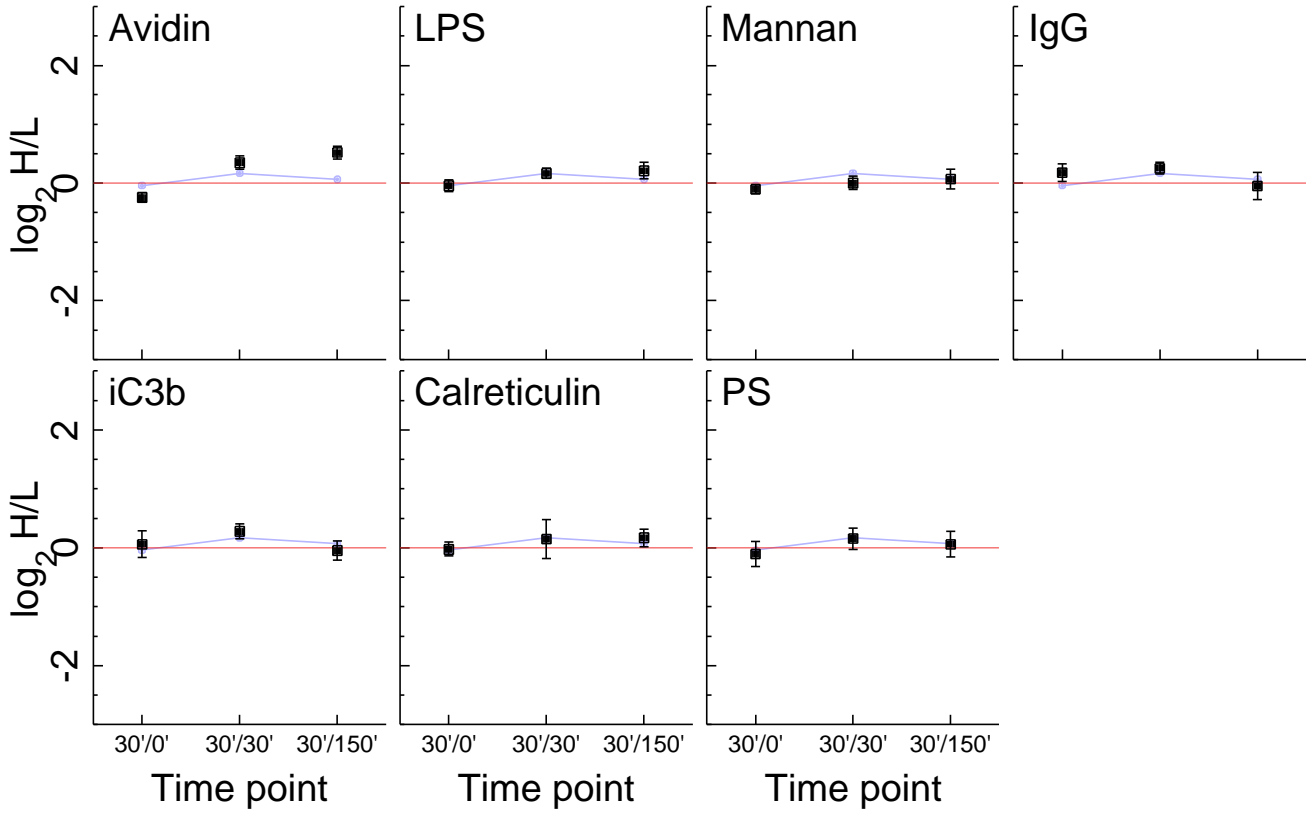

tmem55a (Q9CZX7)

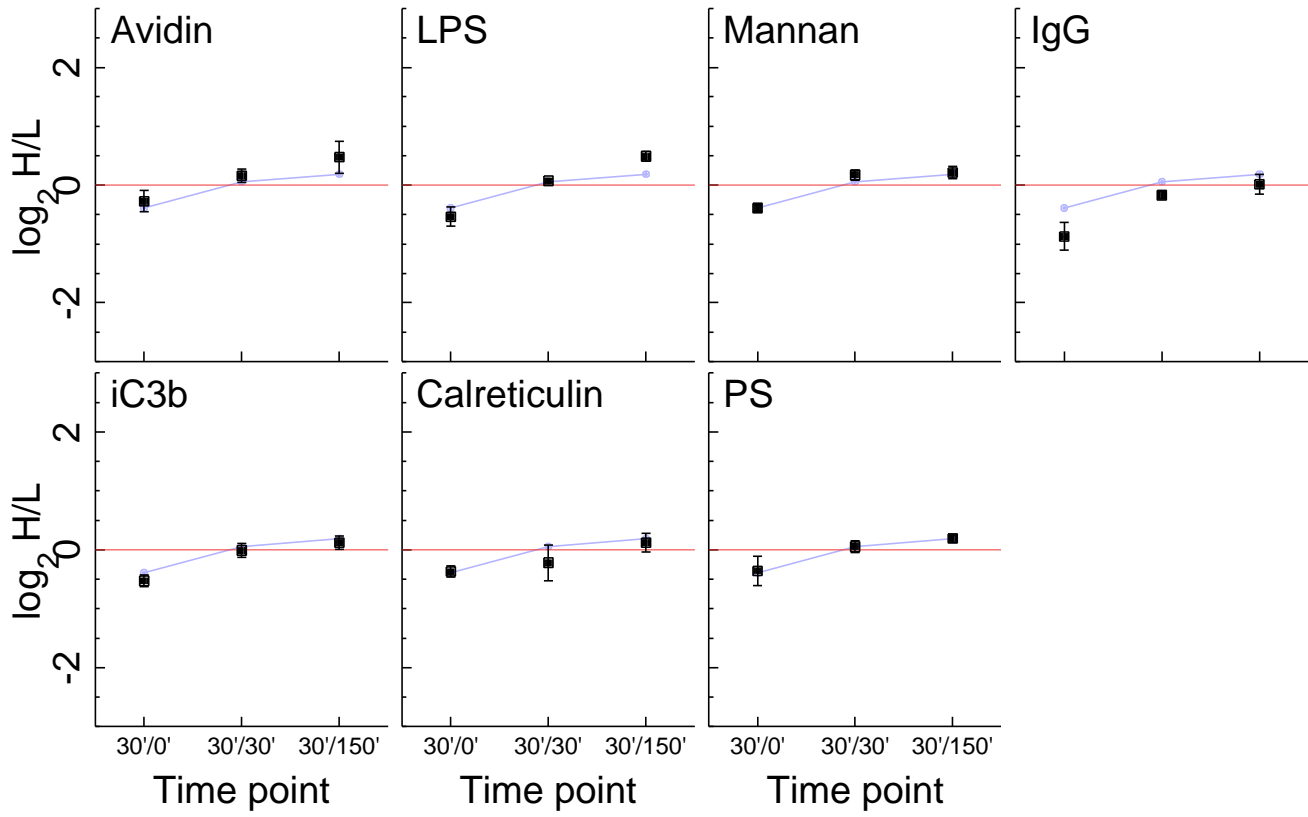

tmem55b (Q3TWL2)

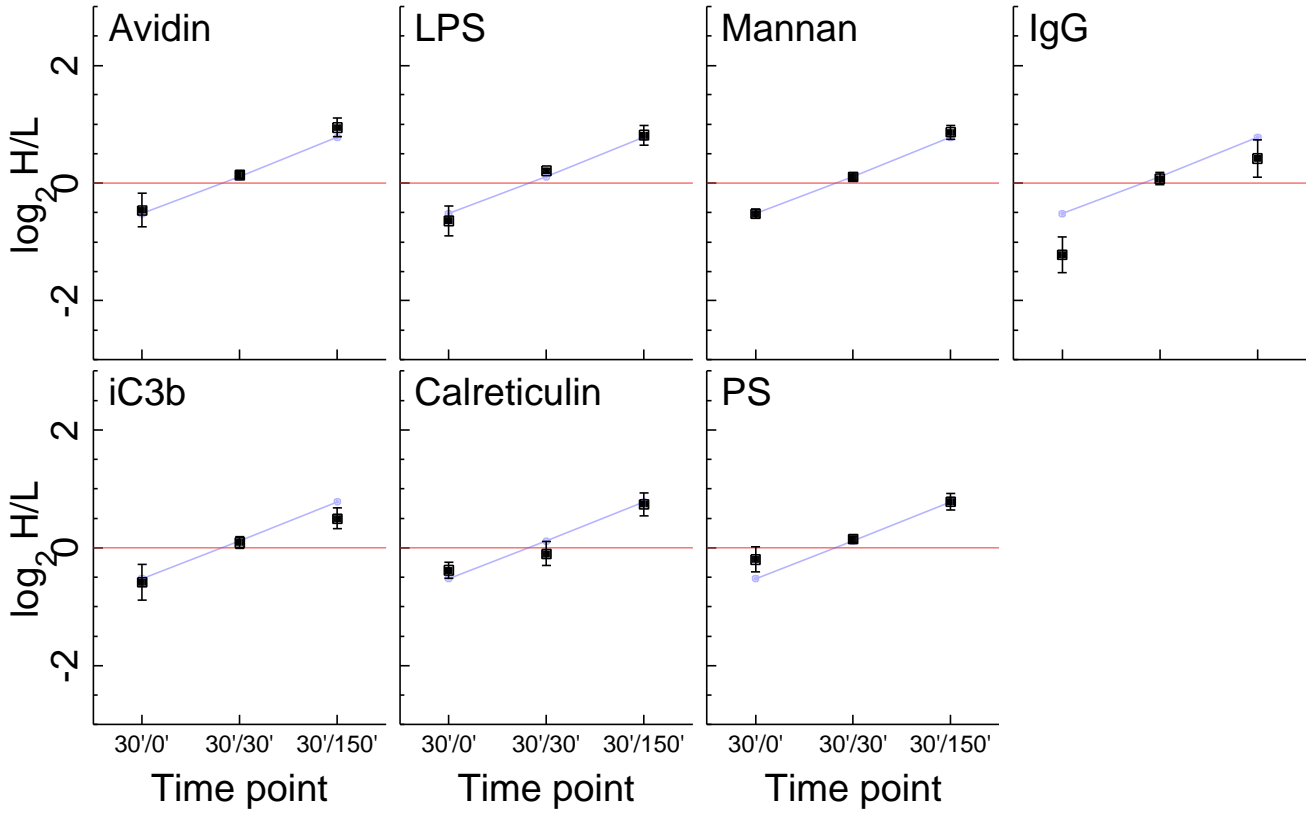



tmem63a (Q91YT8)

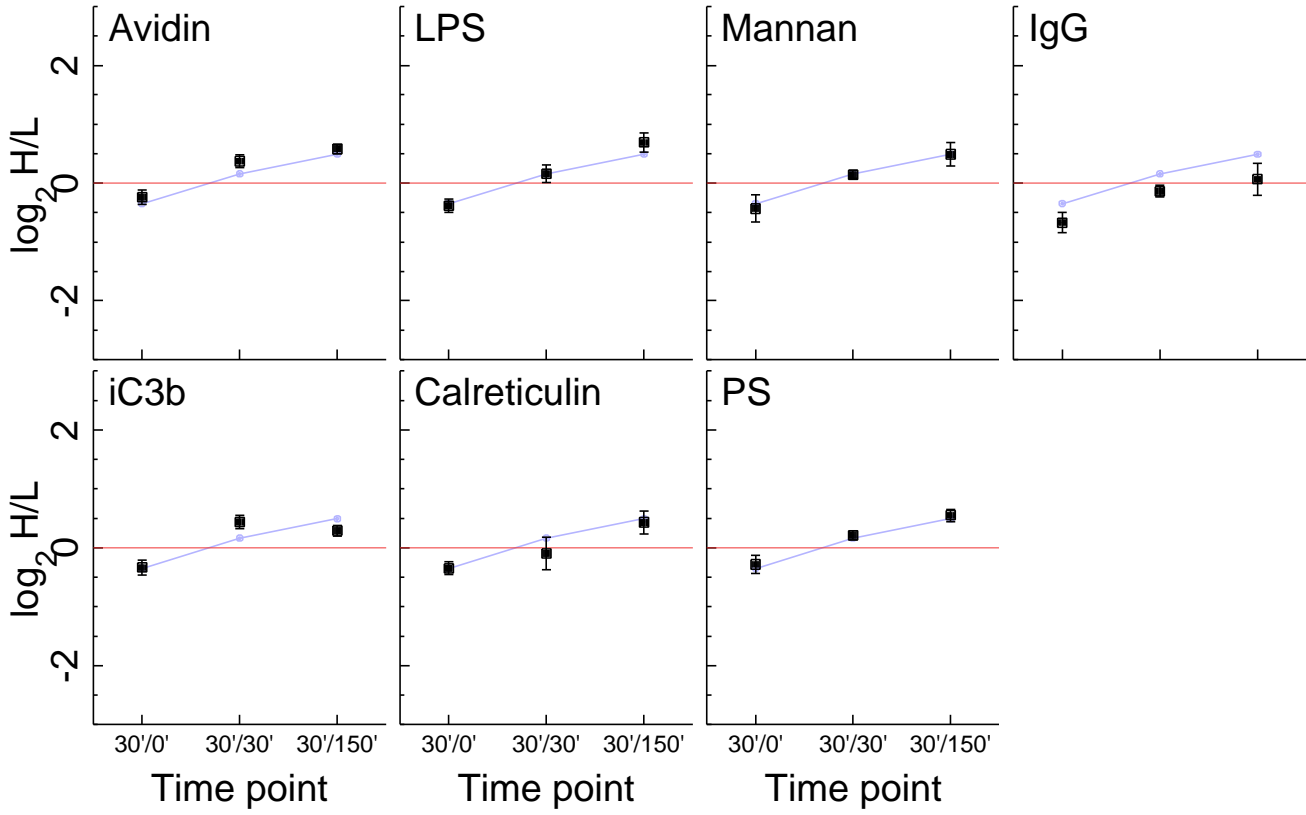

tmem87a (A2AQJ6)

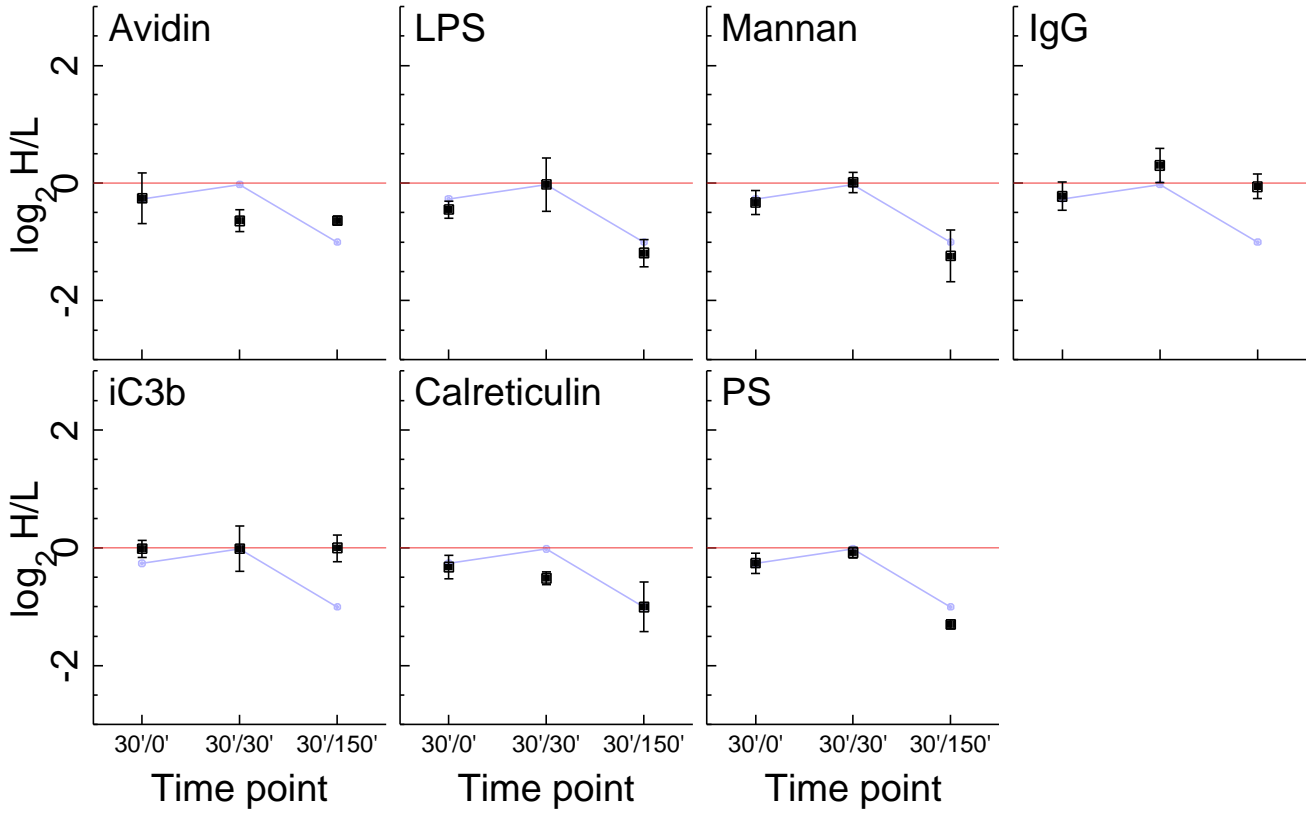

### tmem9b (Q9JJR8)

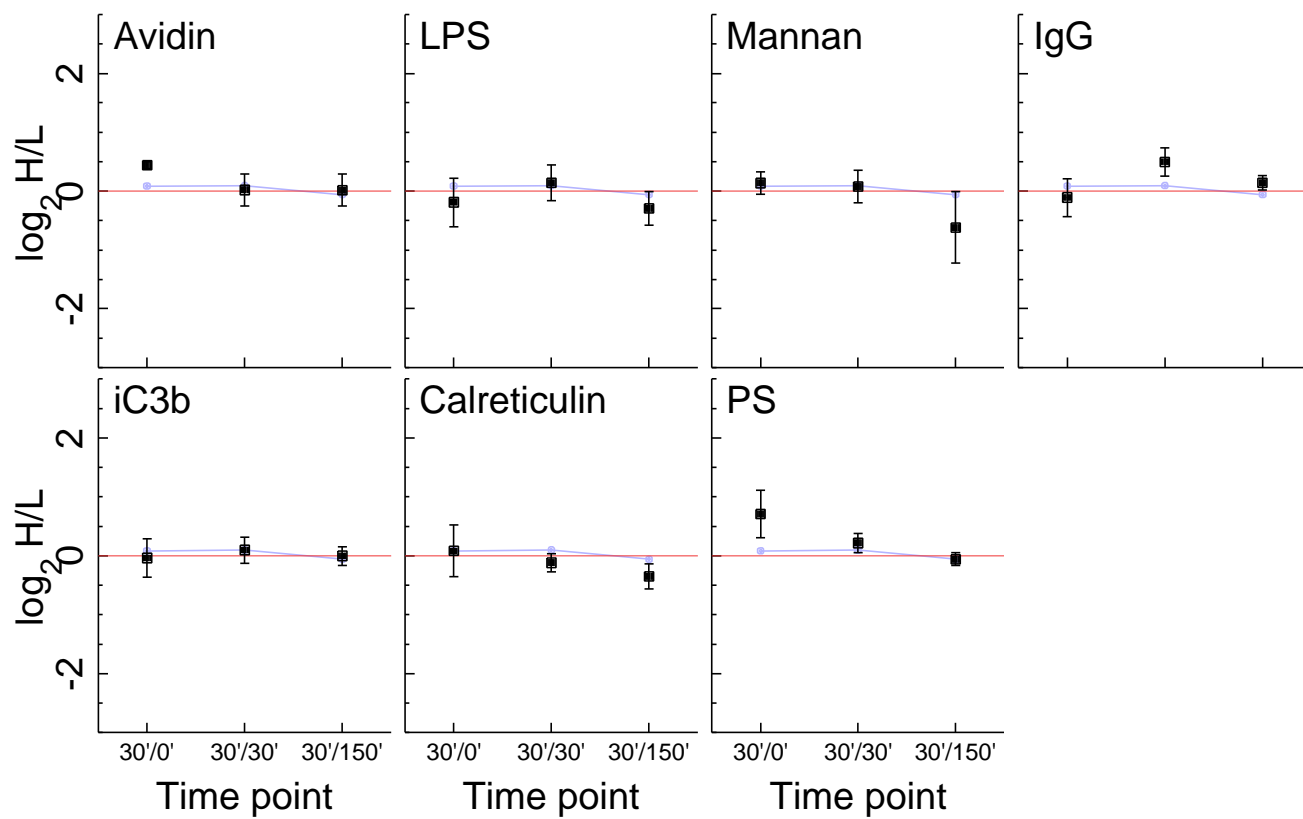

tmpo (Q61029)

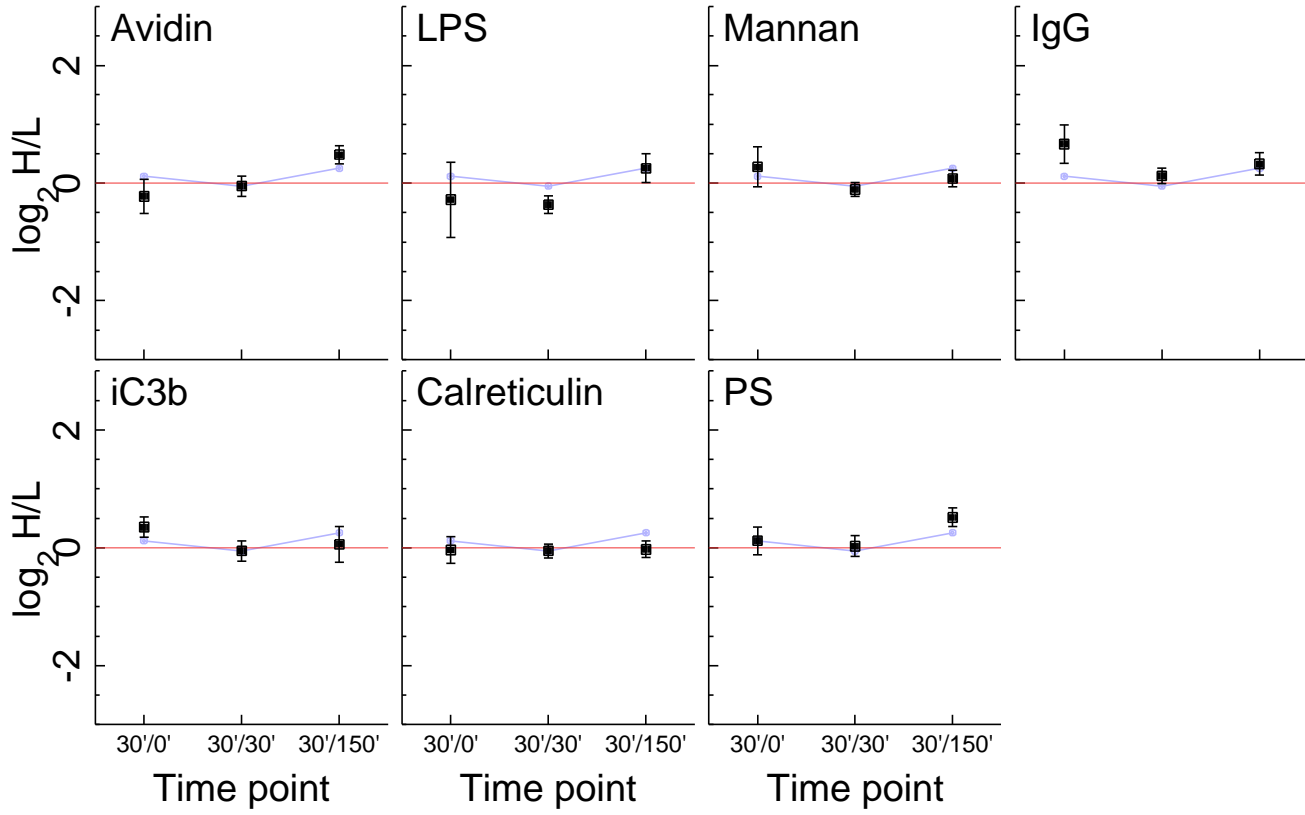

tmsb4x (P20065)

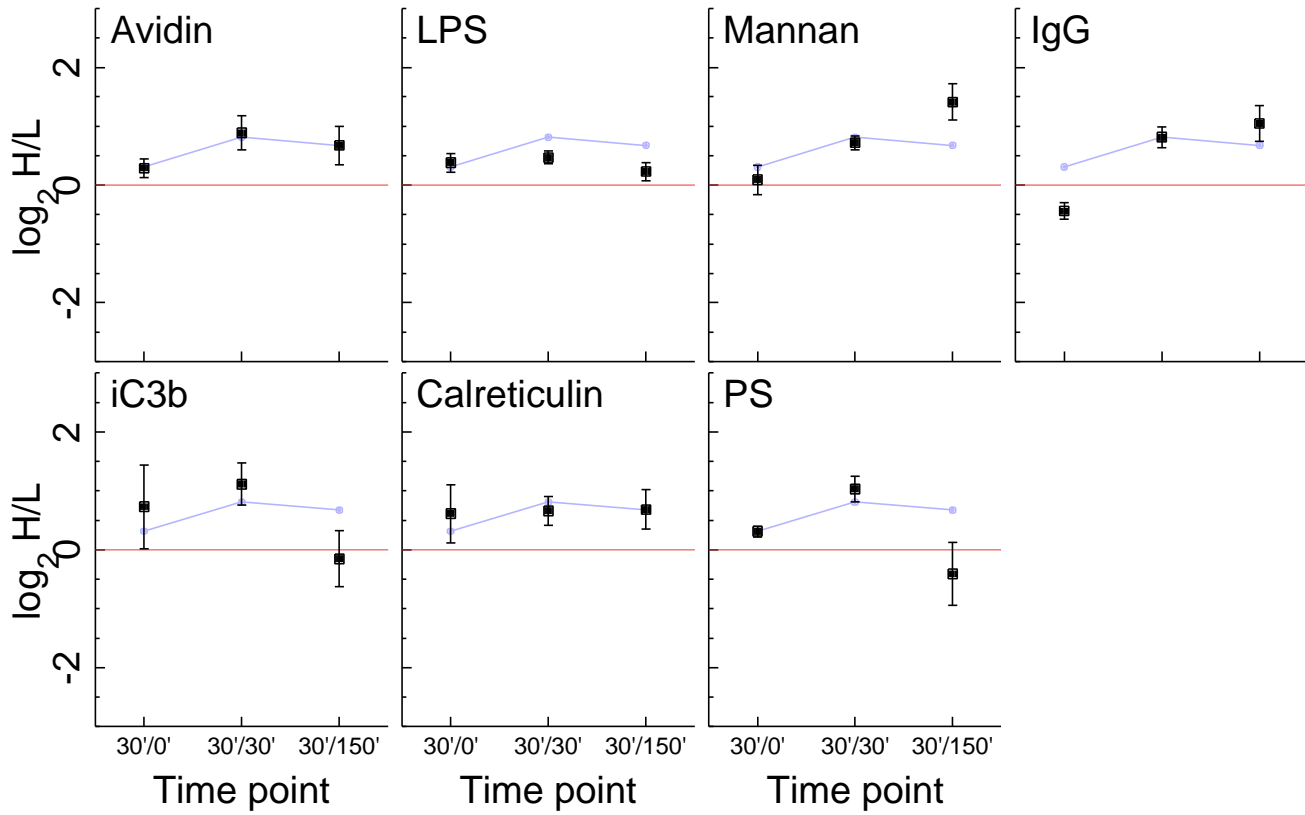

tmx1 (Q8VBT0)

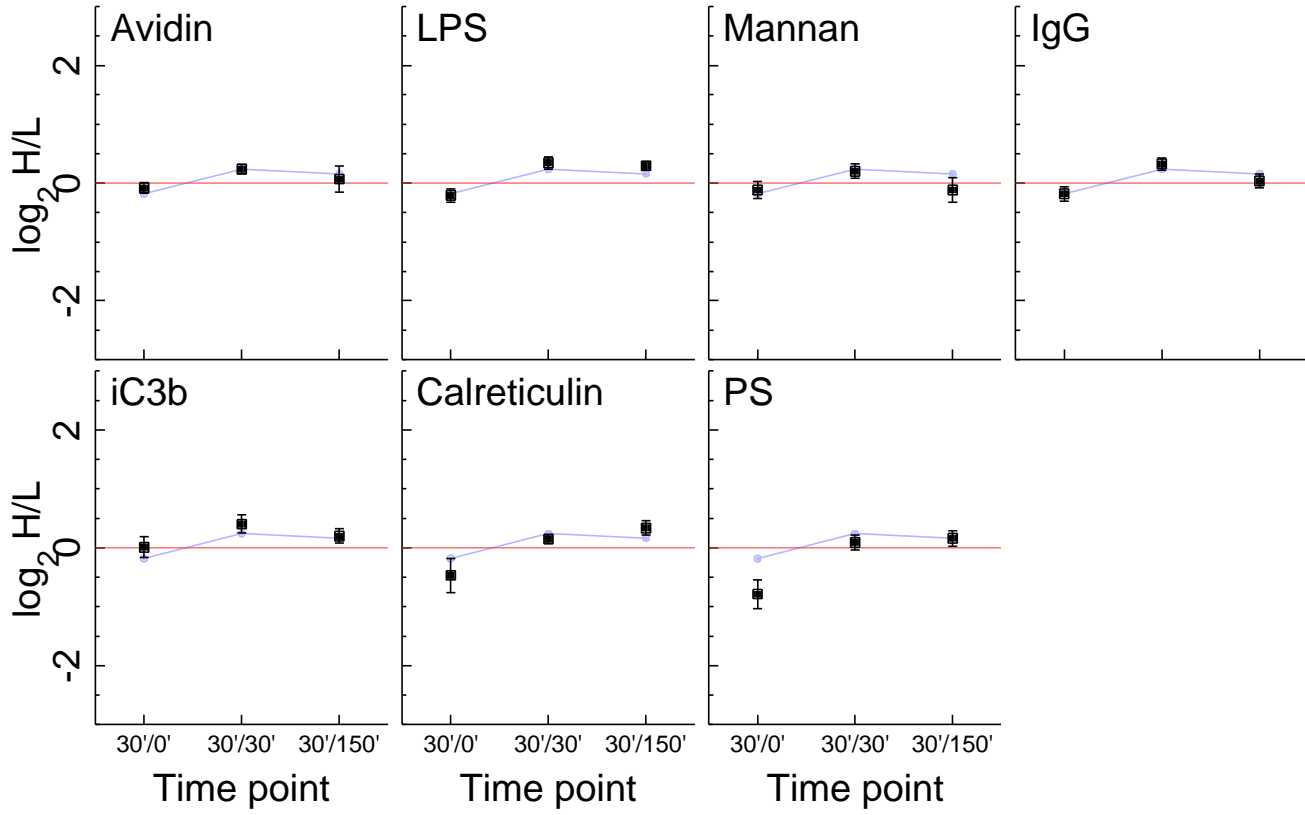

tmx2 (Q9D710)

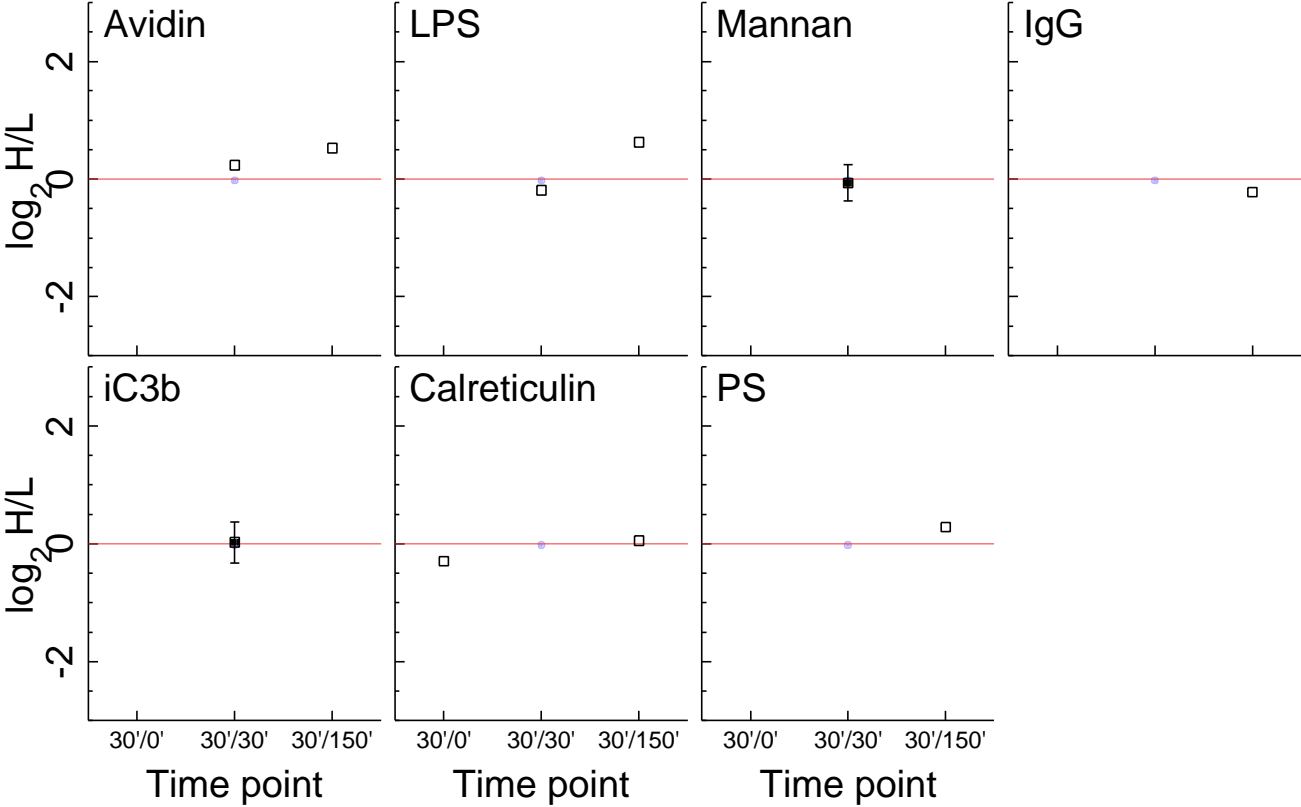

tmx3 (Q8BXZ1)

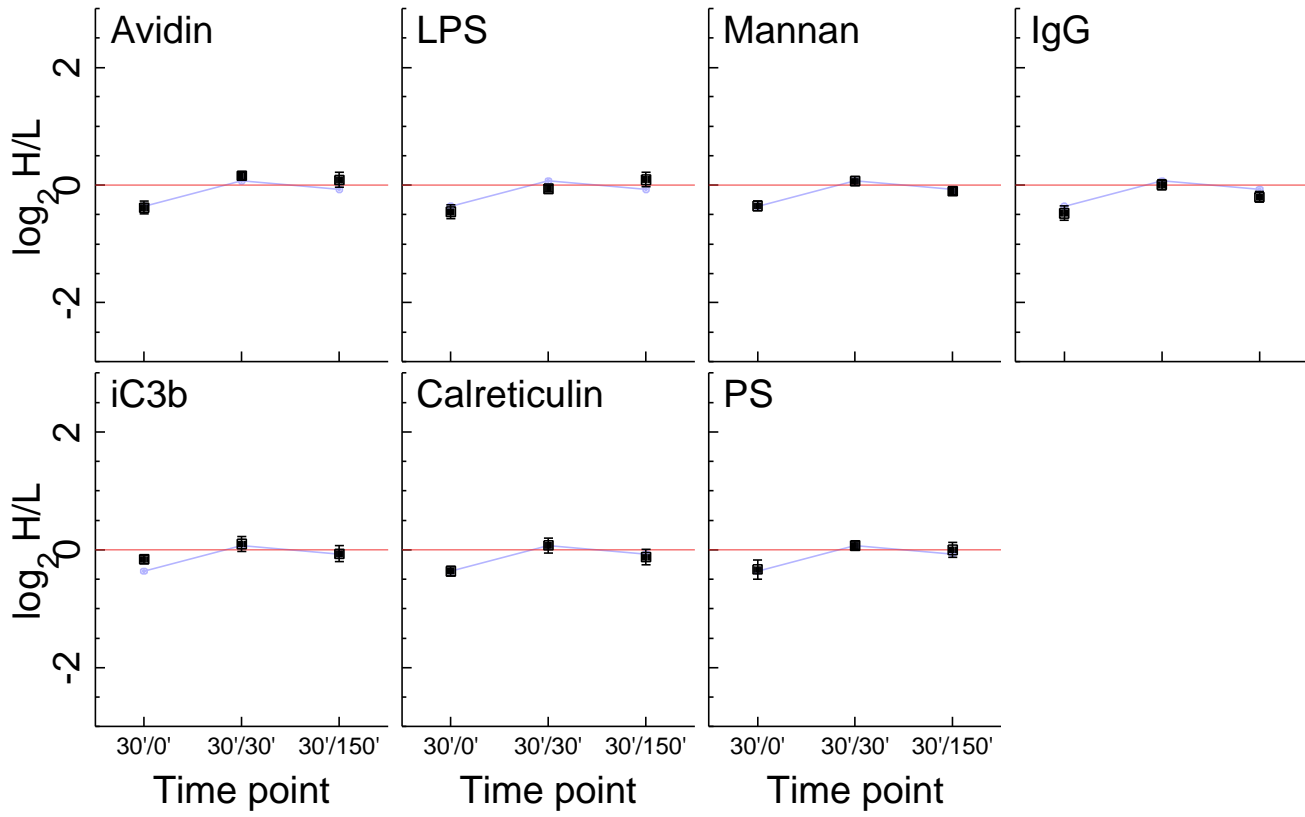



tmx4 (Q8C0L0)

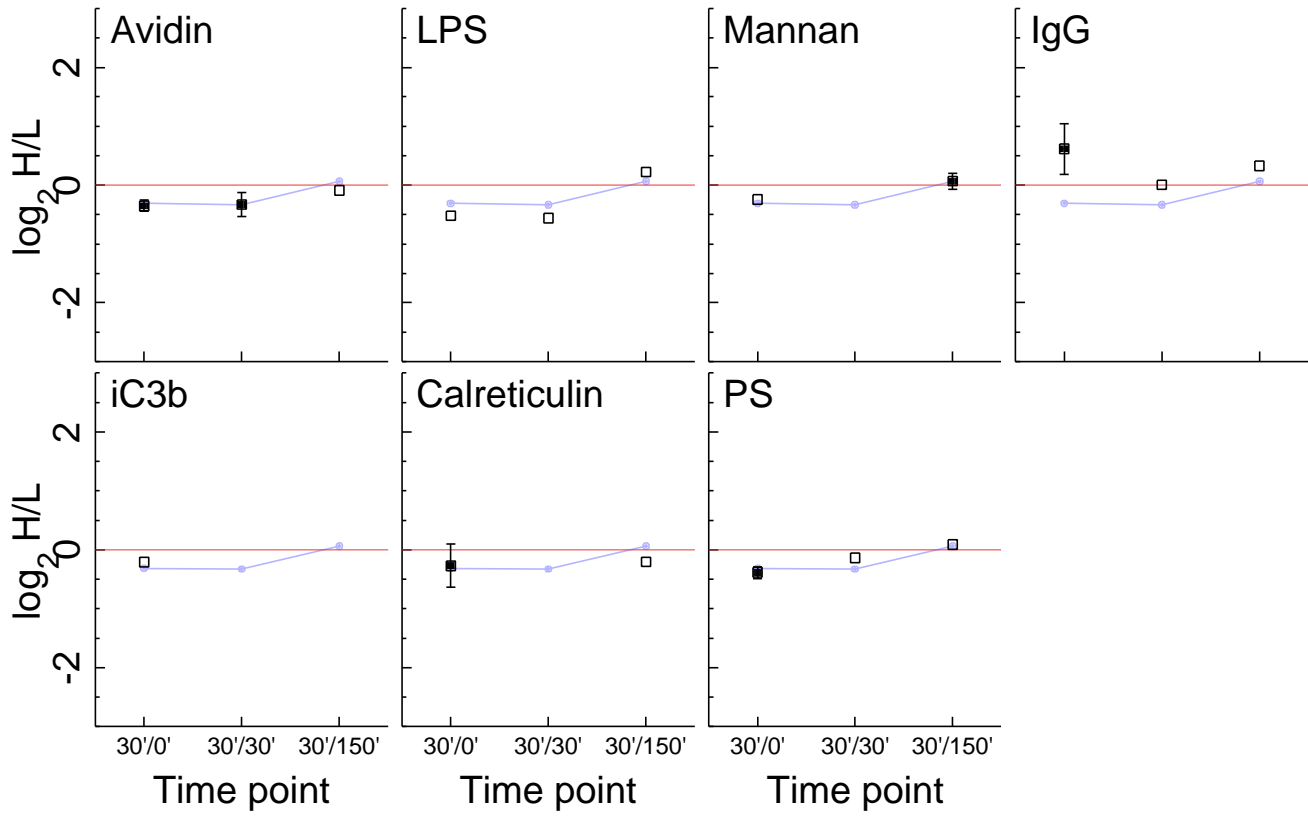

tnfaip2 (D3Z4L9)

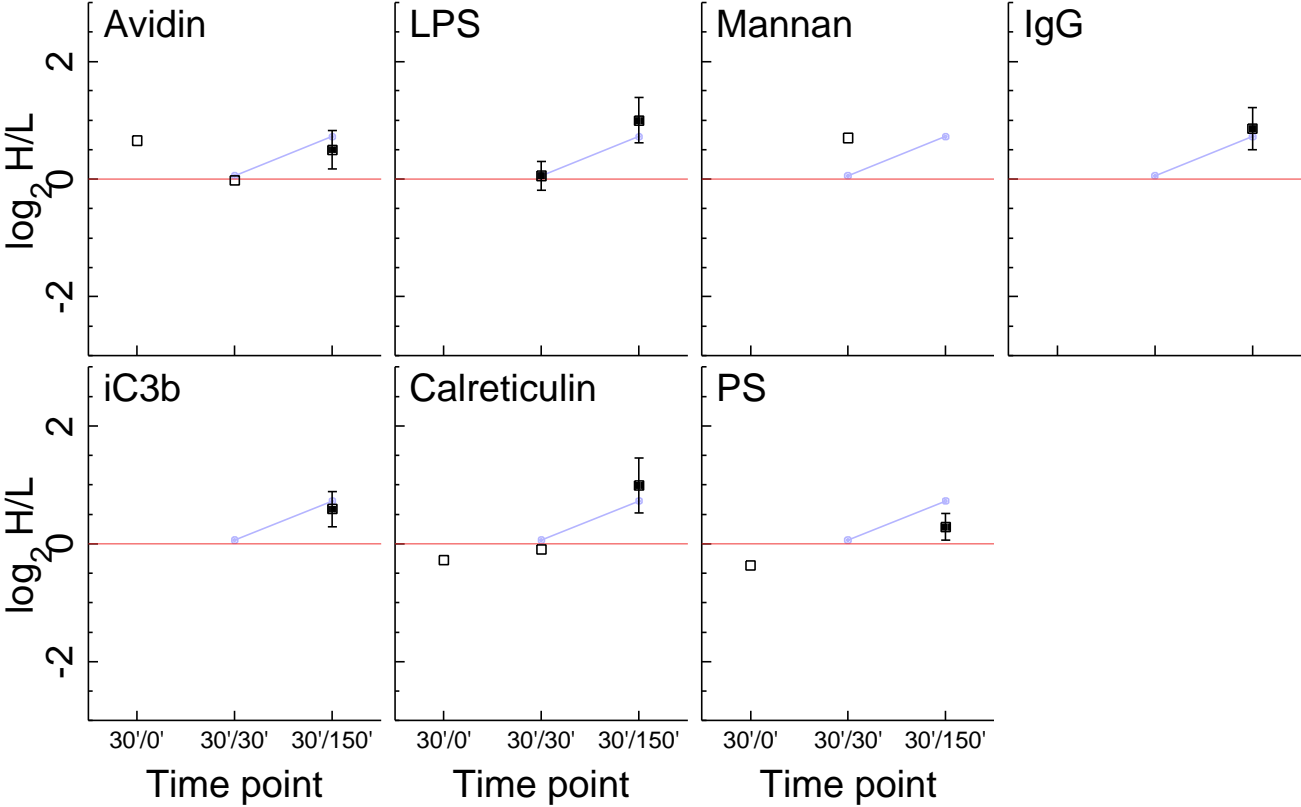

### tnfaip8l2 (Q9D8Y7)

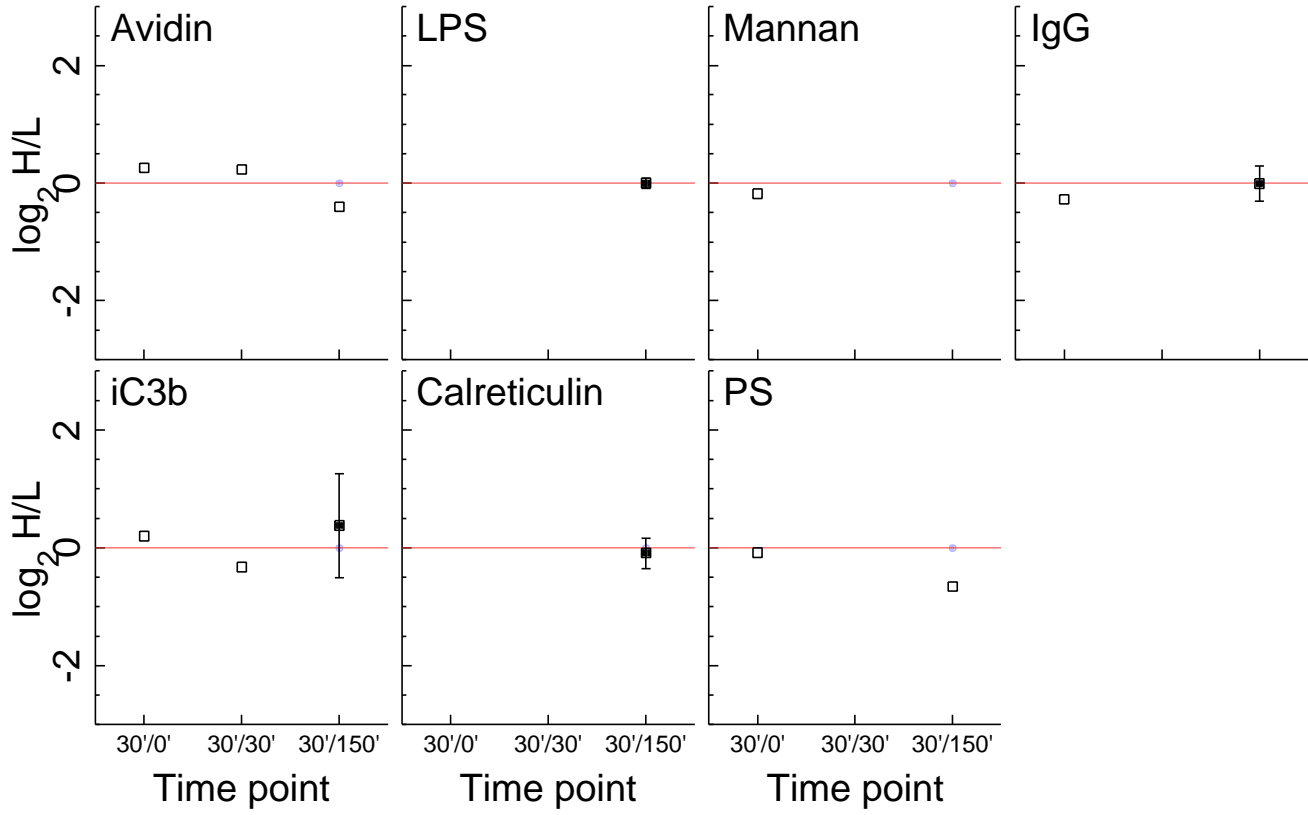

tnf (P06804)

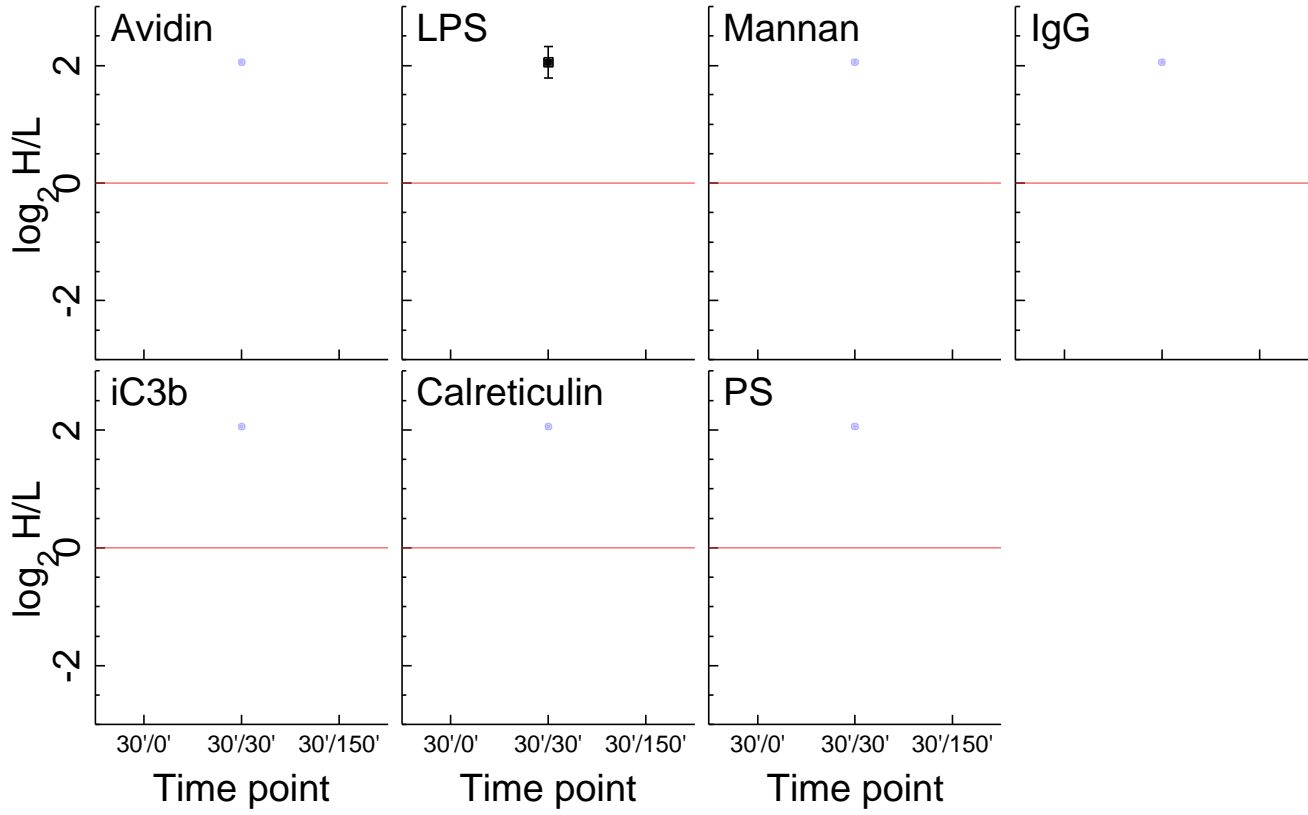

tnfrsf23 (Q9ER63)

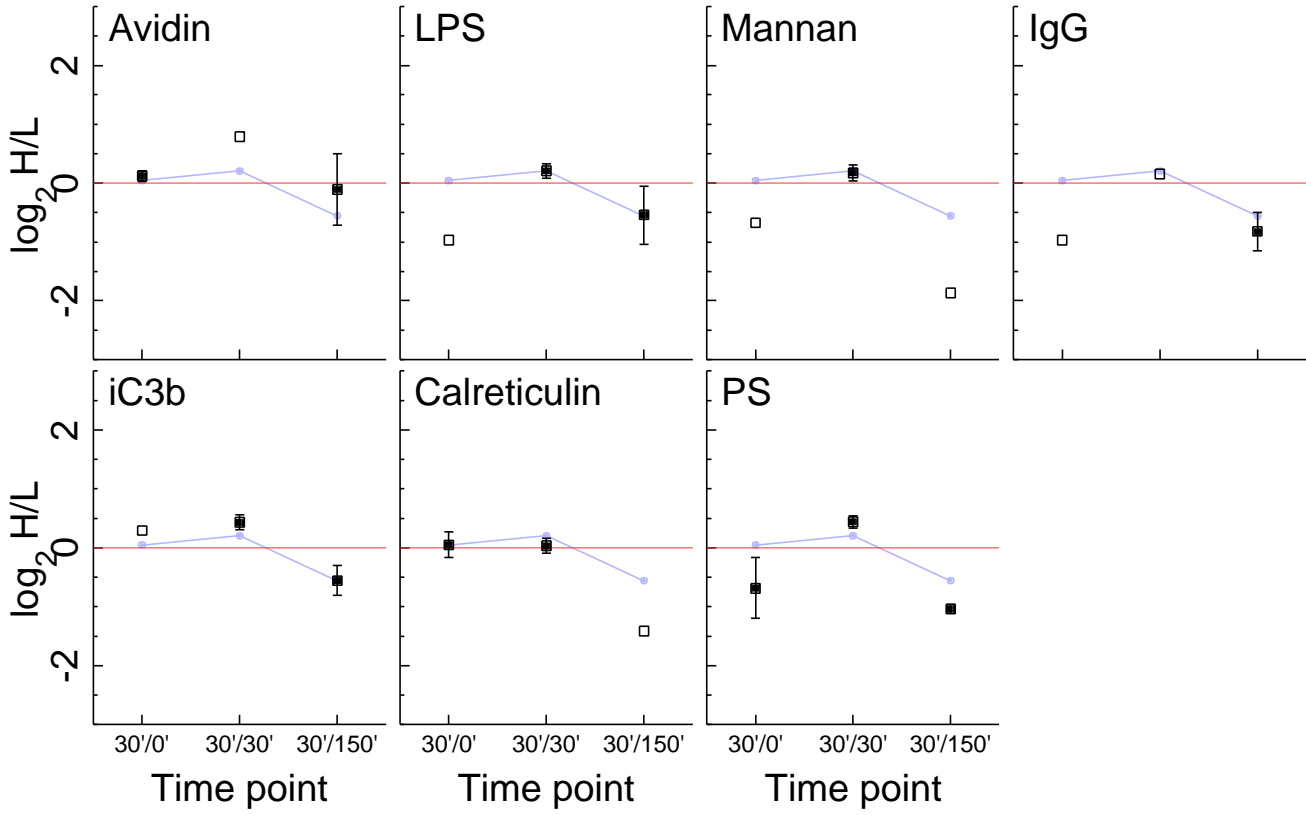

tns1 (E9Q0S6)

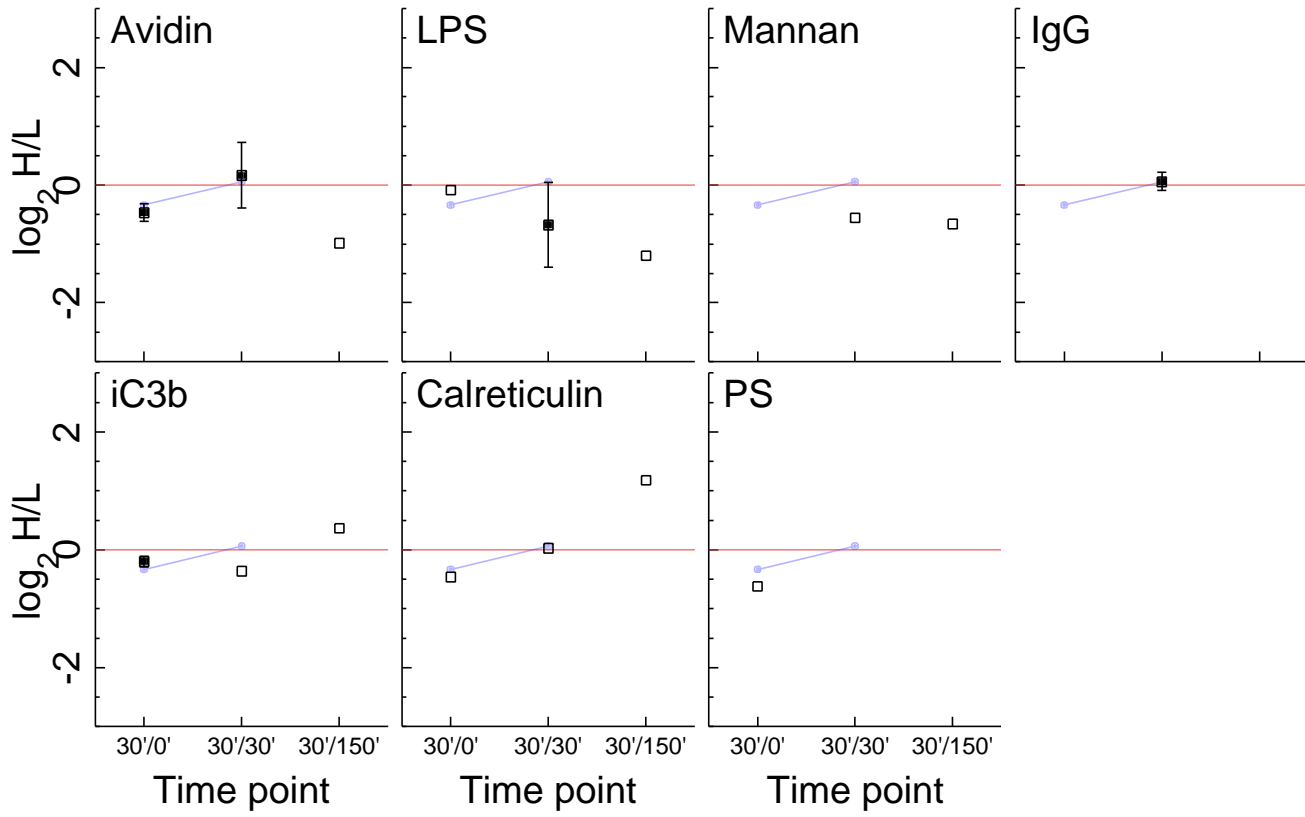

tollip (Q9QZ06)

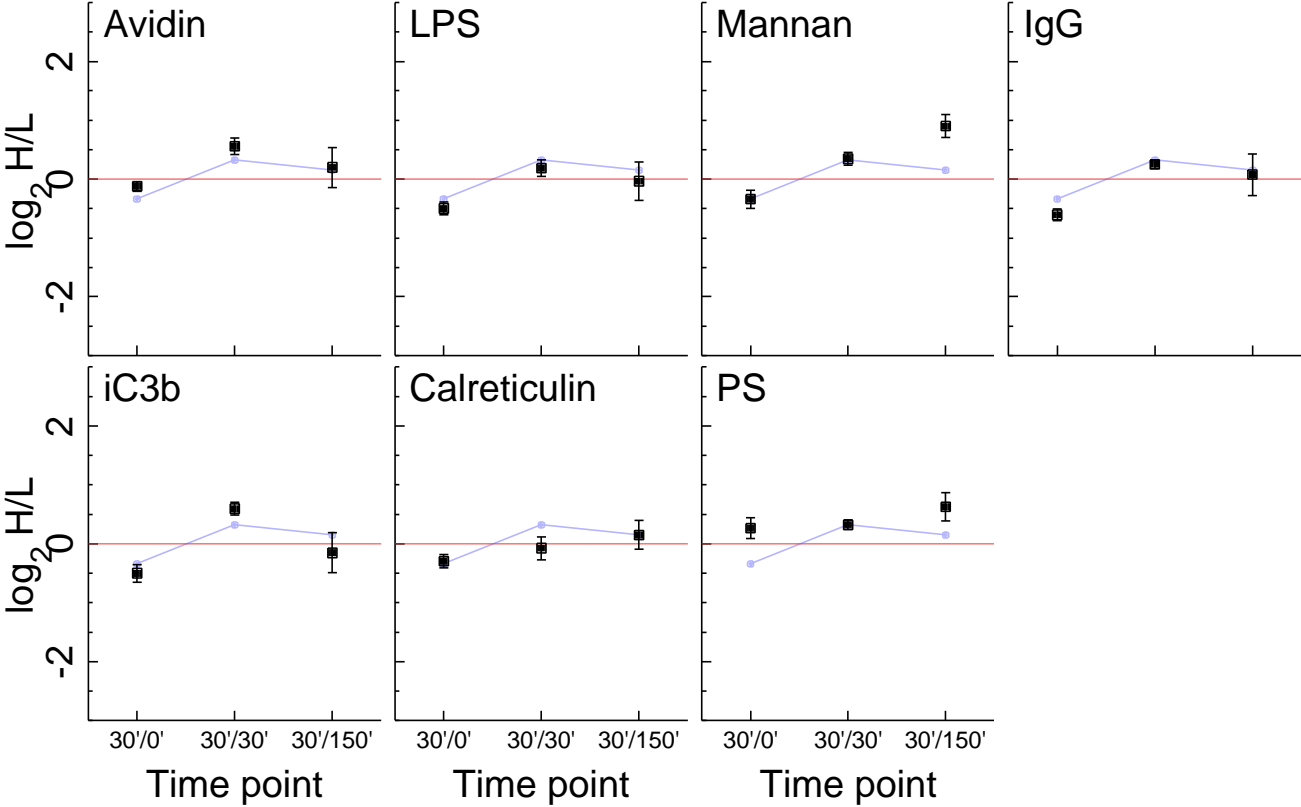

tom1 (Q3UDC3)

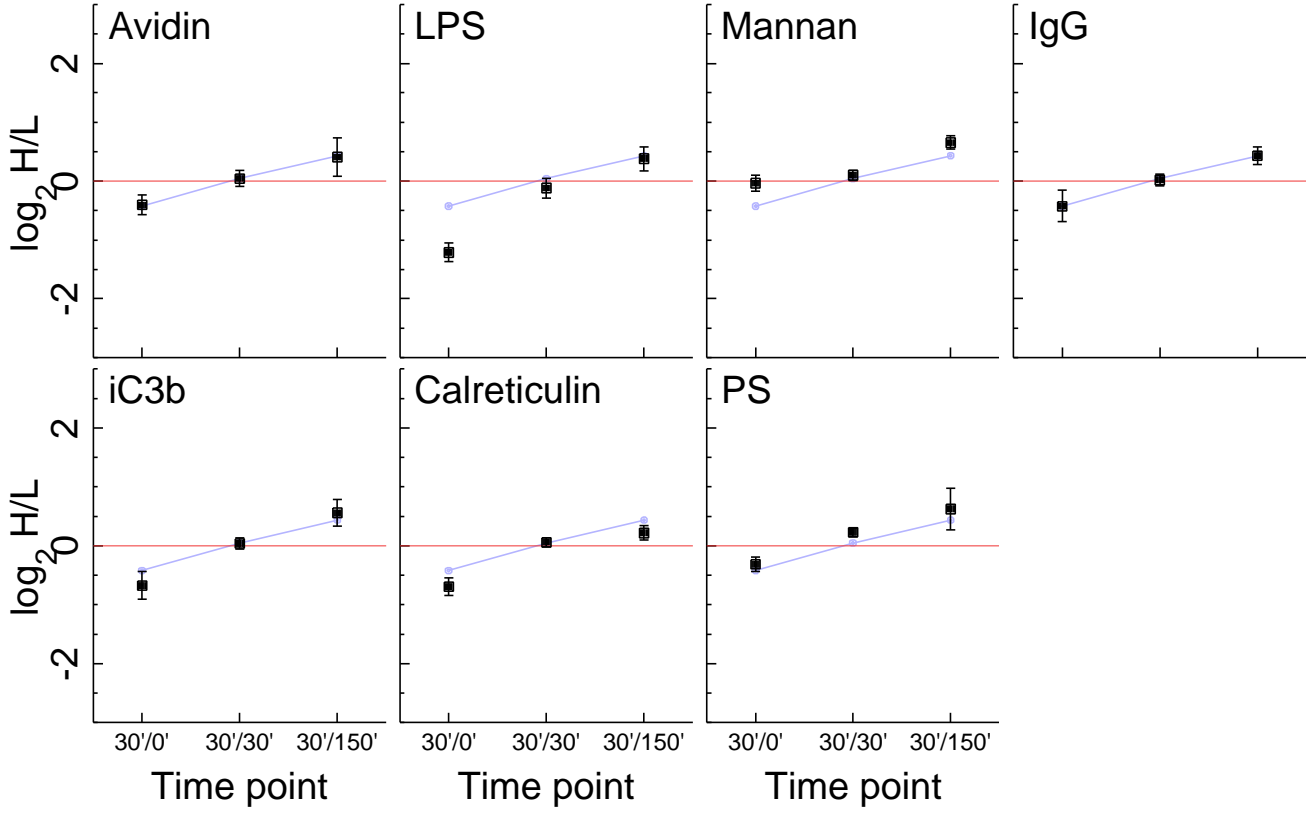



### tomm20 (Q9DCC8)

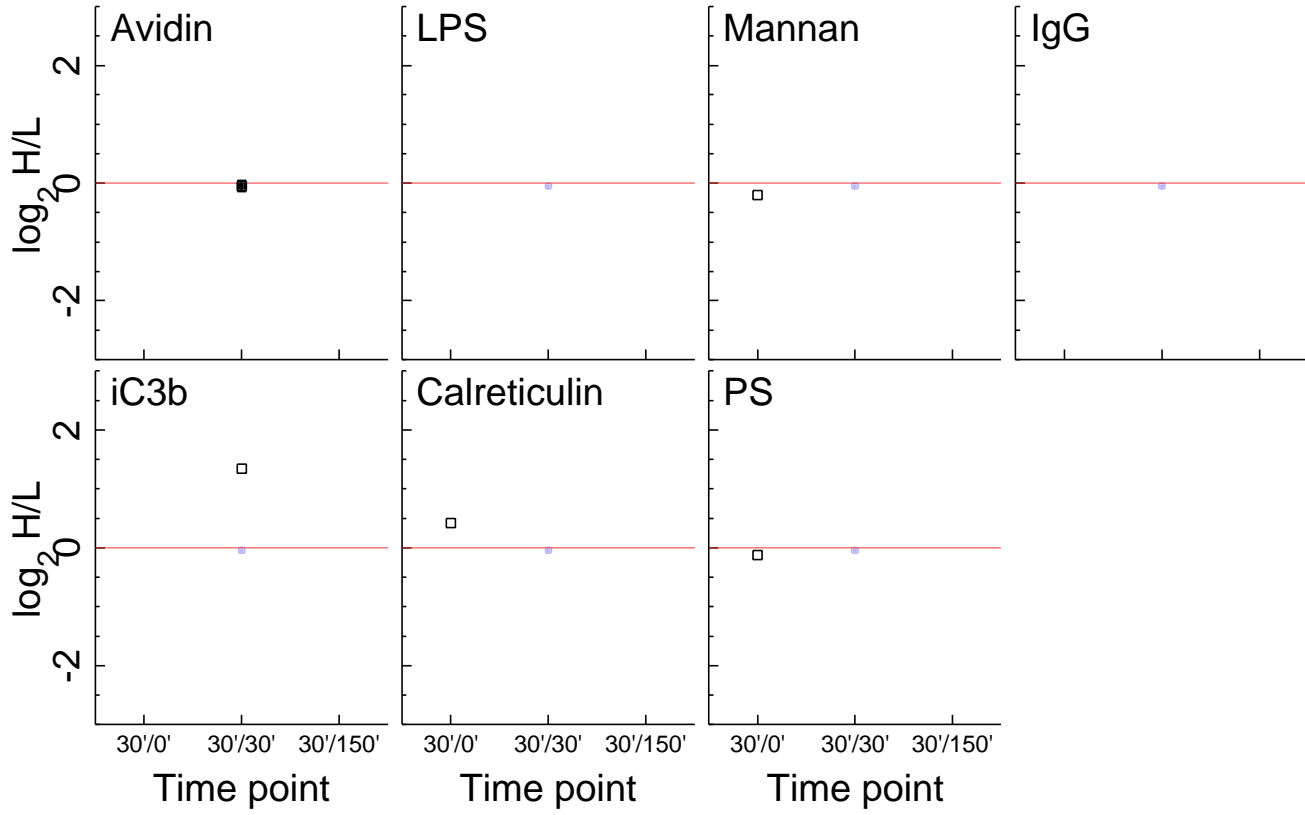

### tomm40 (Q9QYA2)

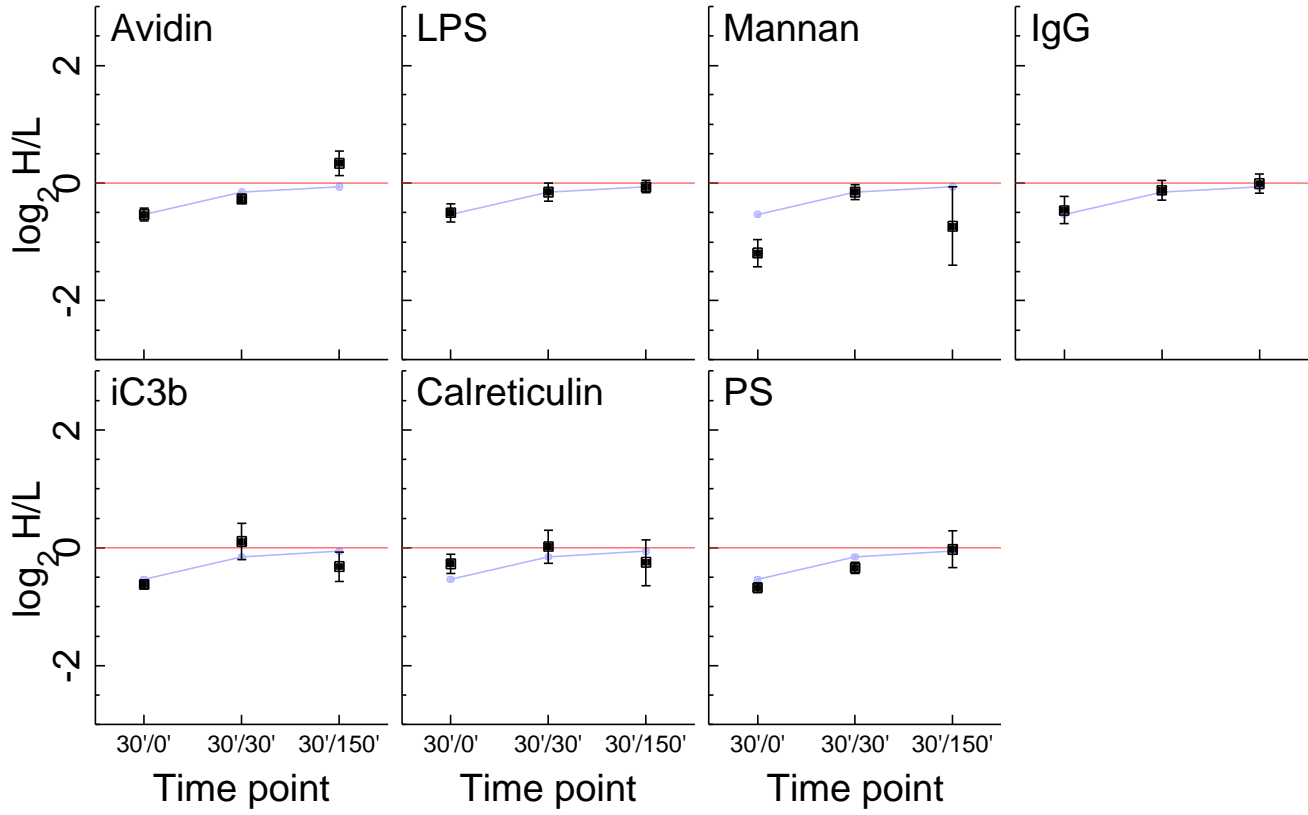

### tomm70a (Q9CZW5)

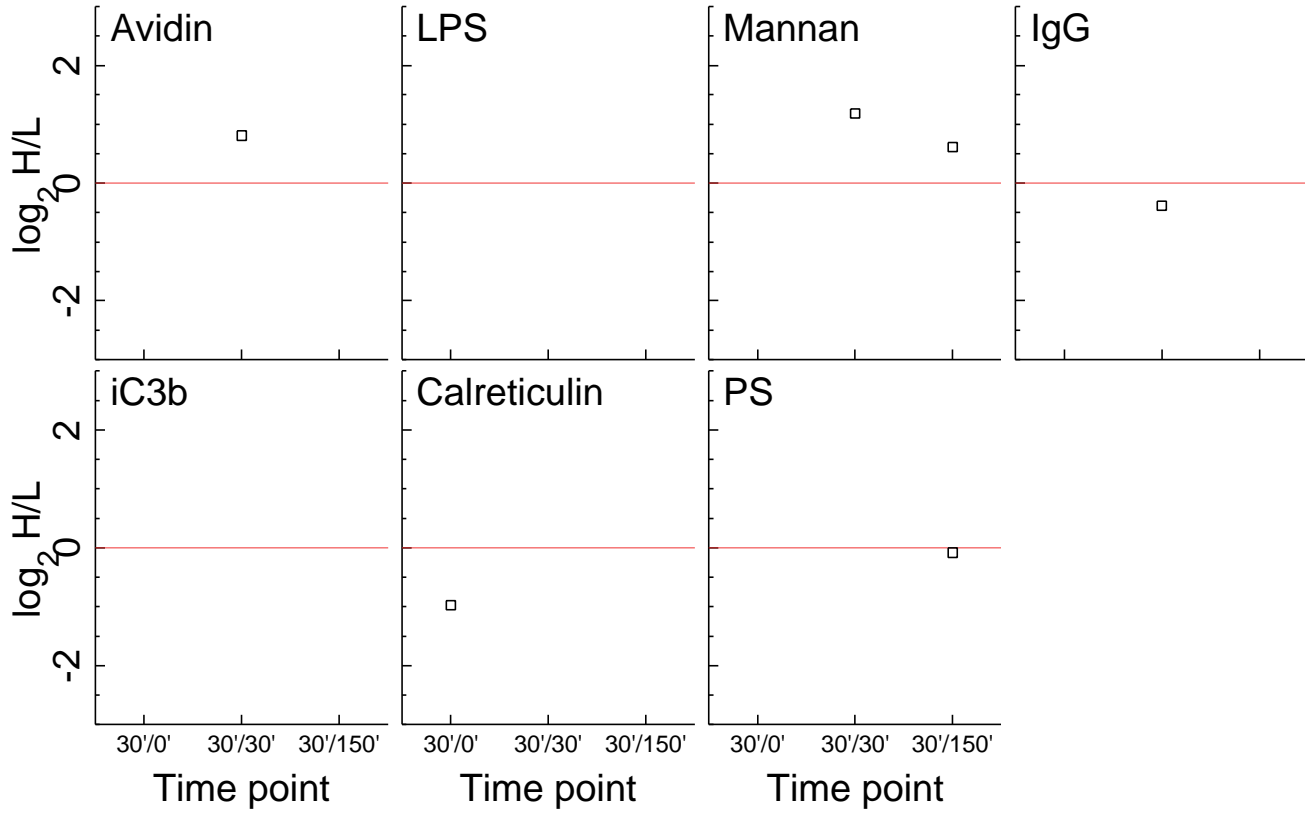

top2a (Q01320)

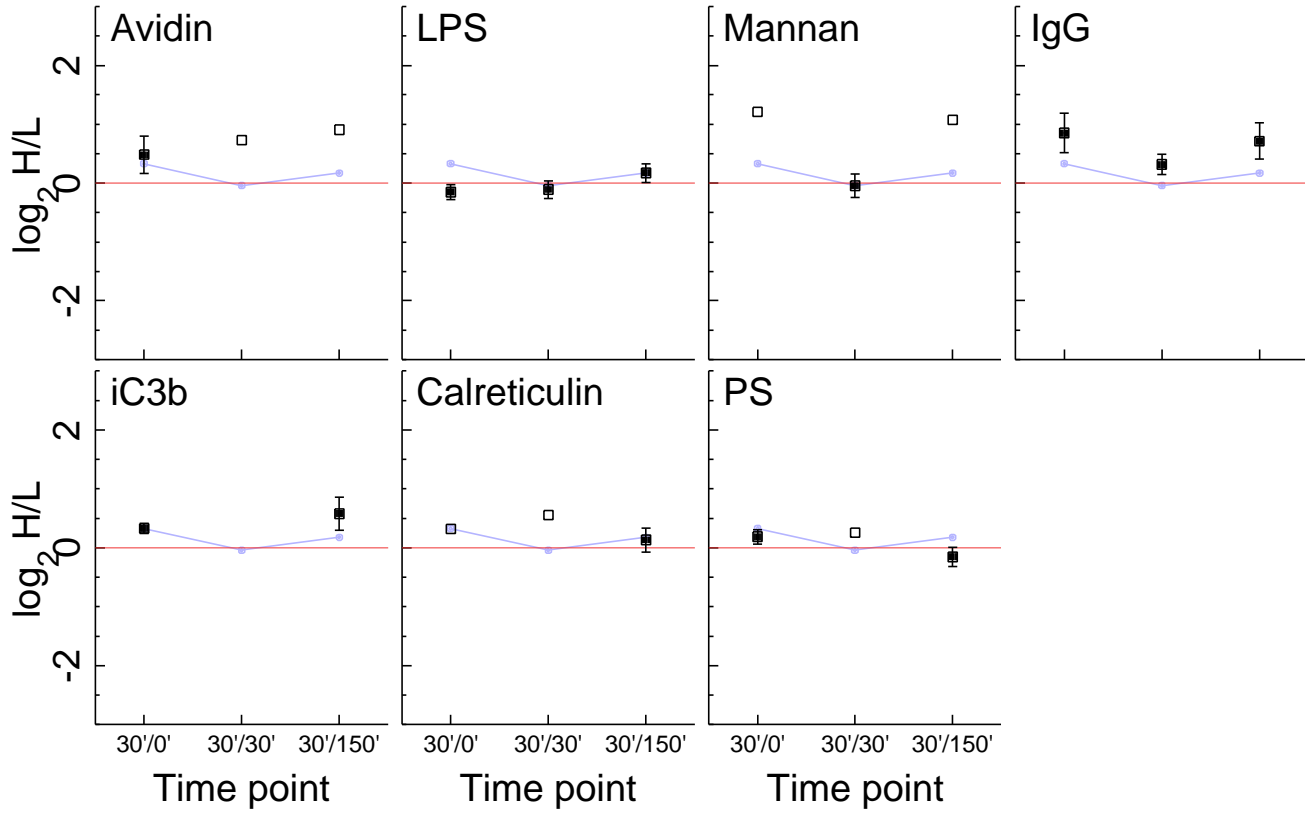

### tor1aip1 (Q921T2)

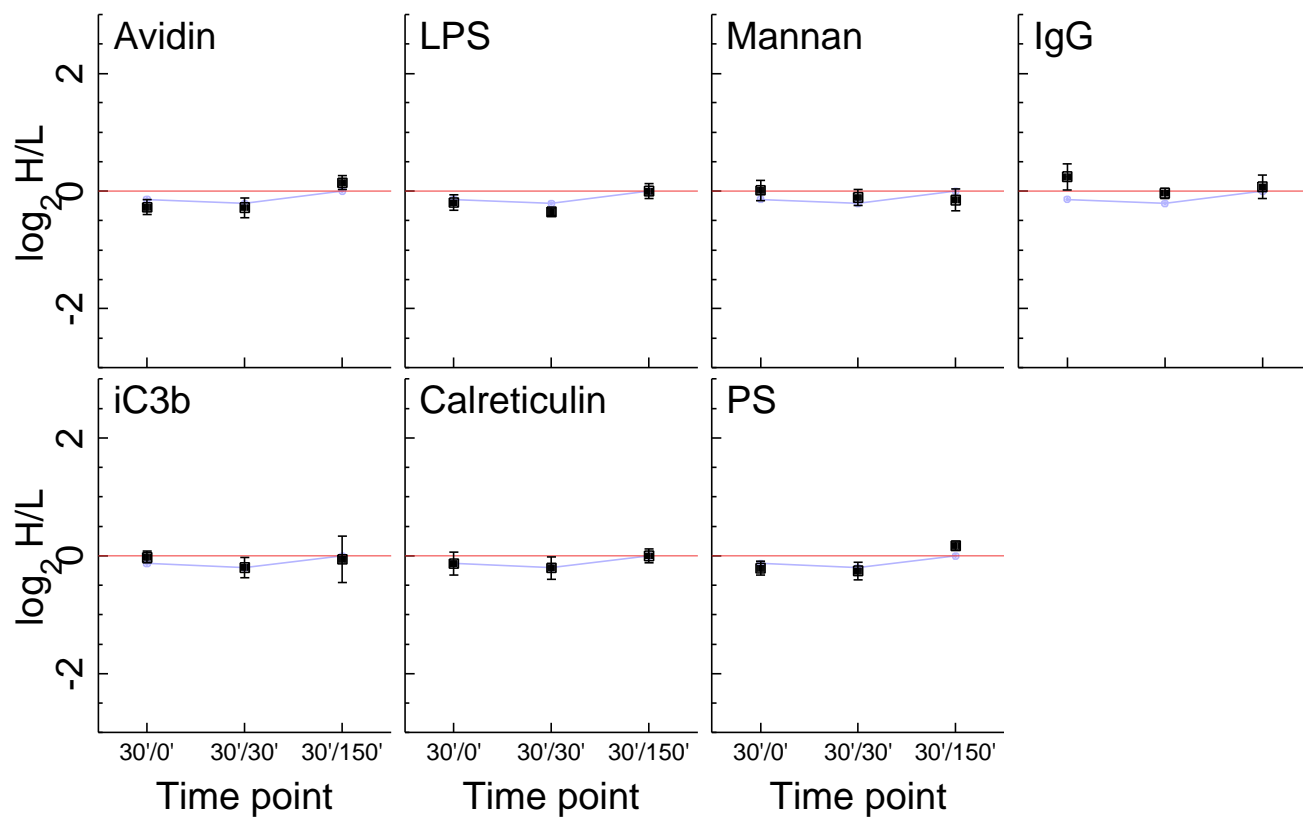

tor1aip2 (Q8BYU6)

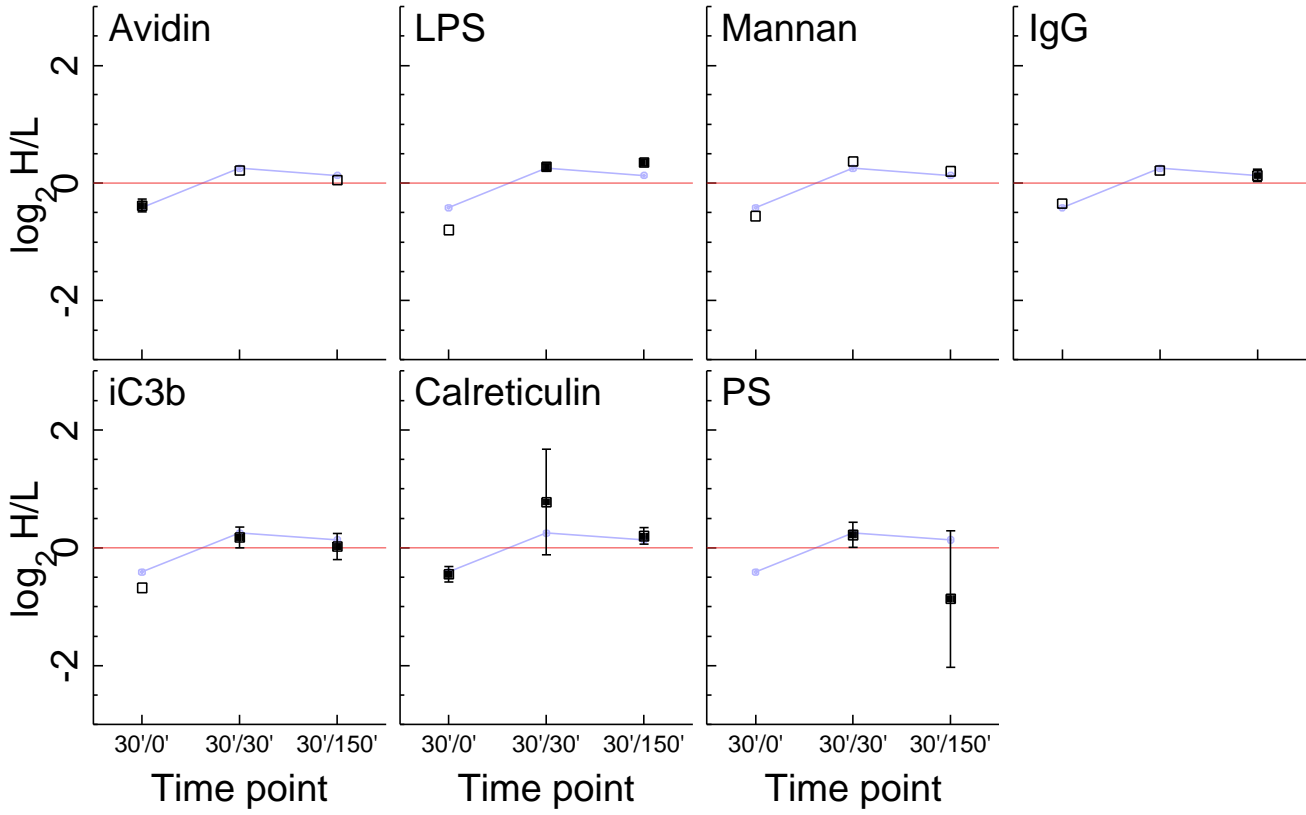

### tor3a (Q9ER38)

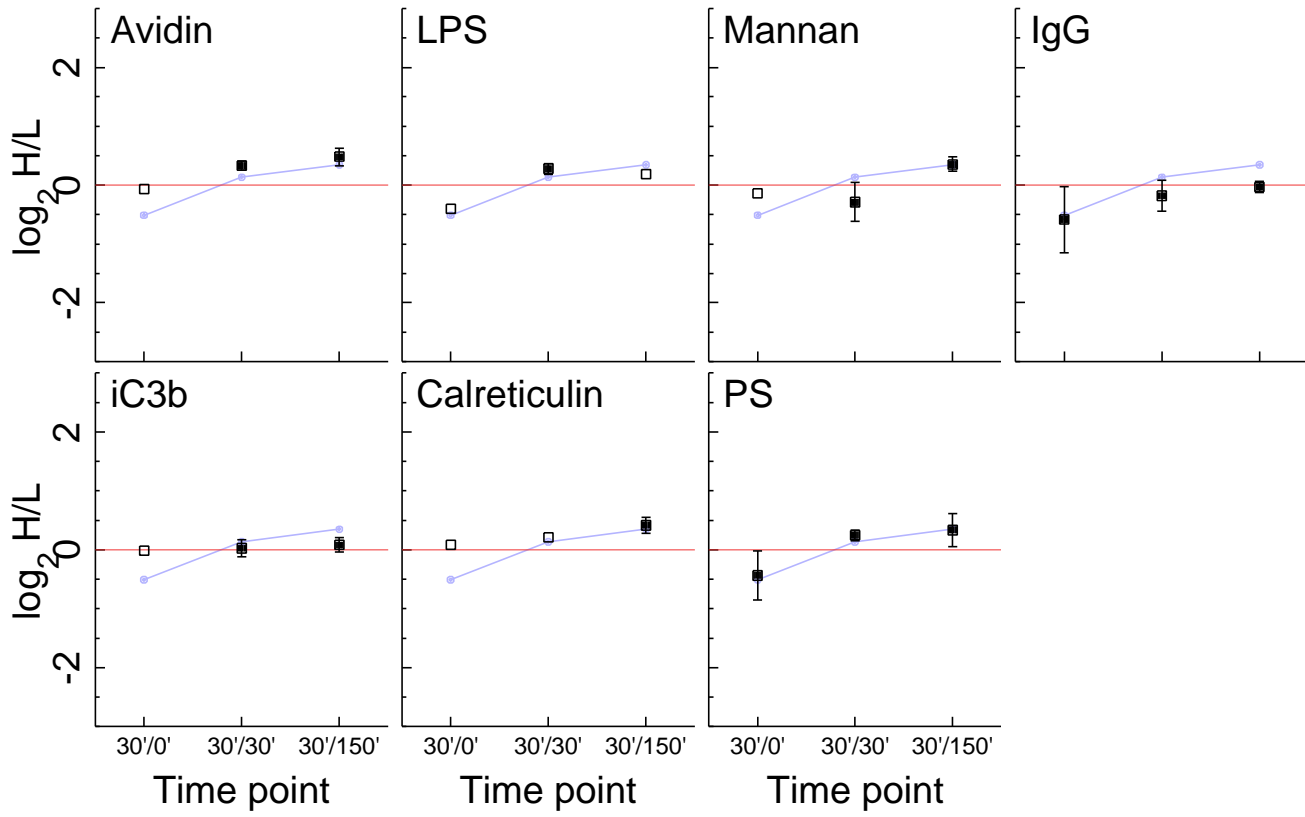

tpcn1 (Q9EQJ0)

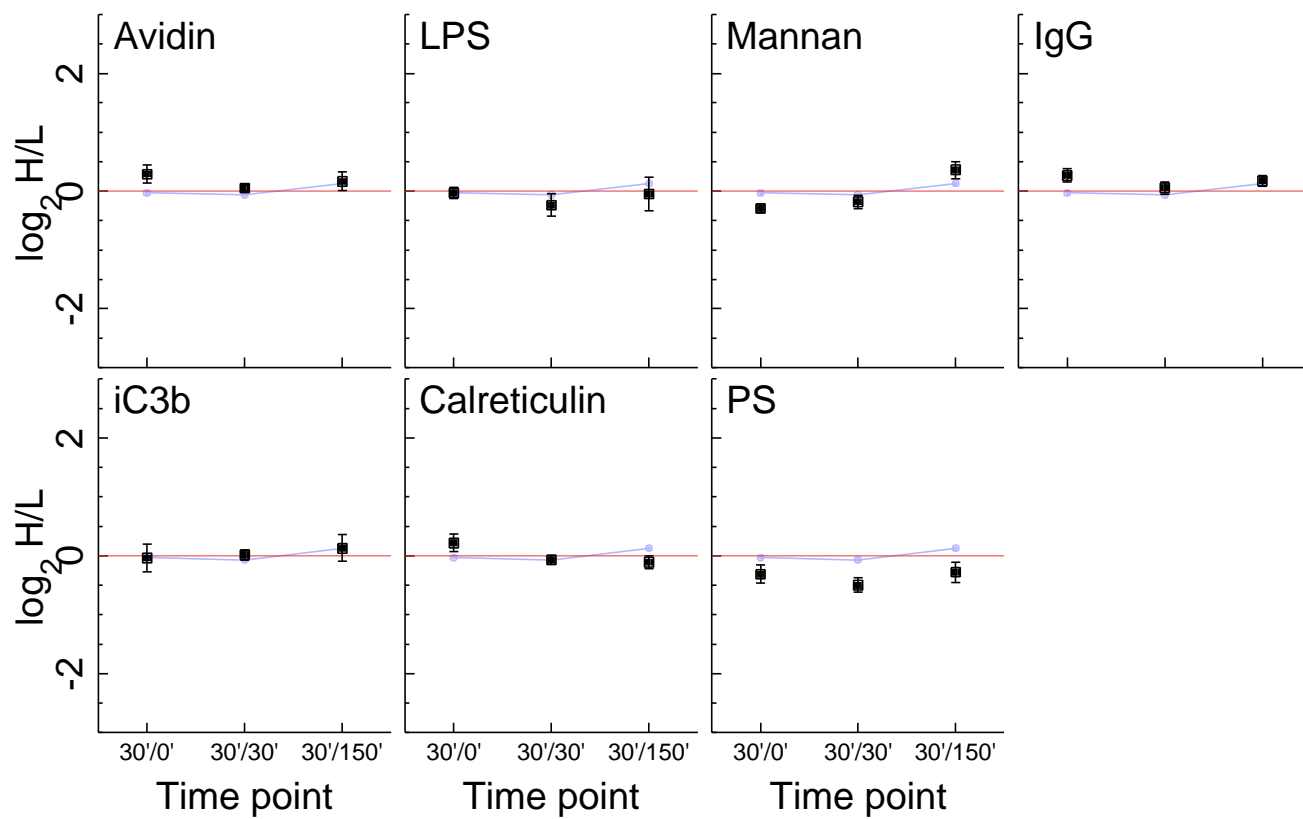



tpcn2 (Q8BWC0)

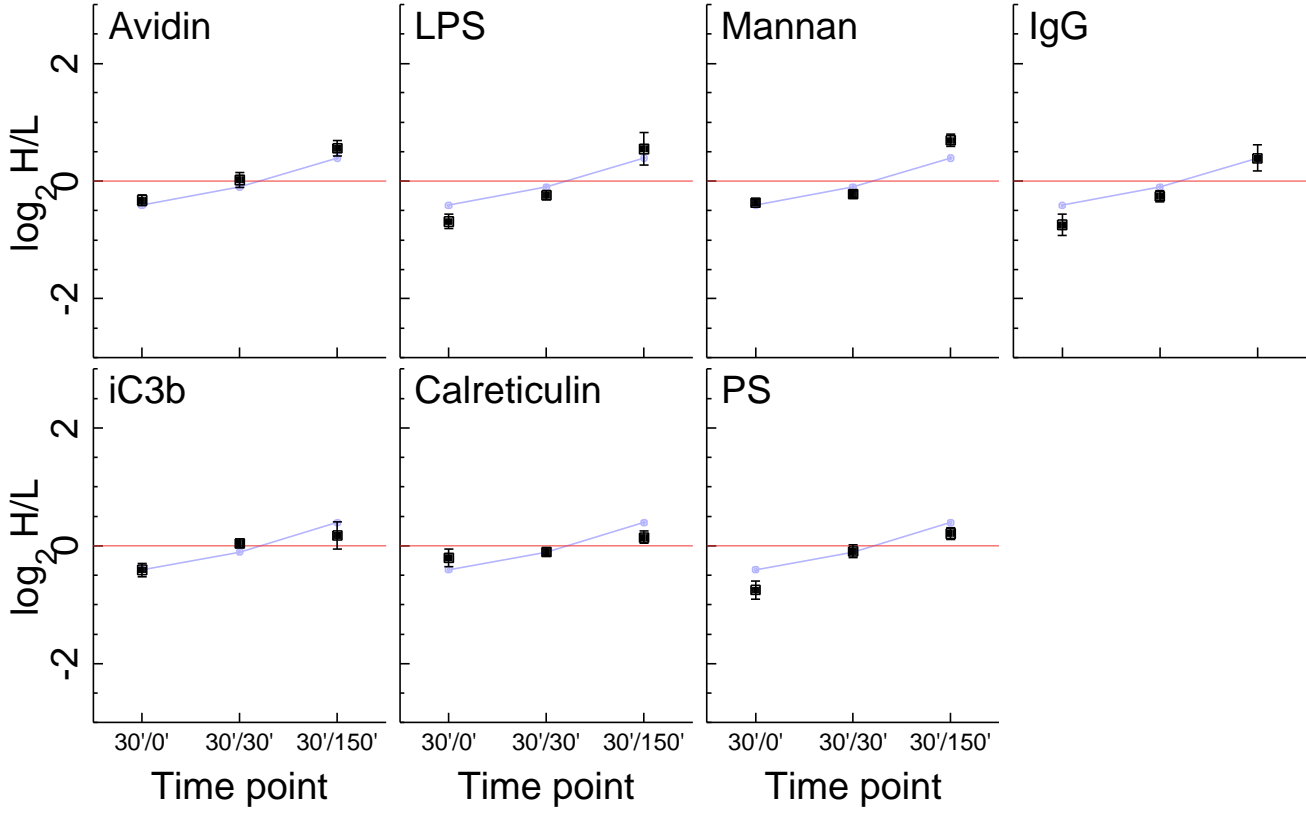

tpd52 (F8WHQ1)

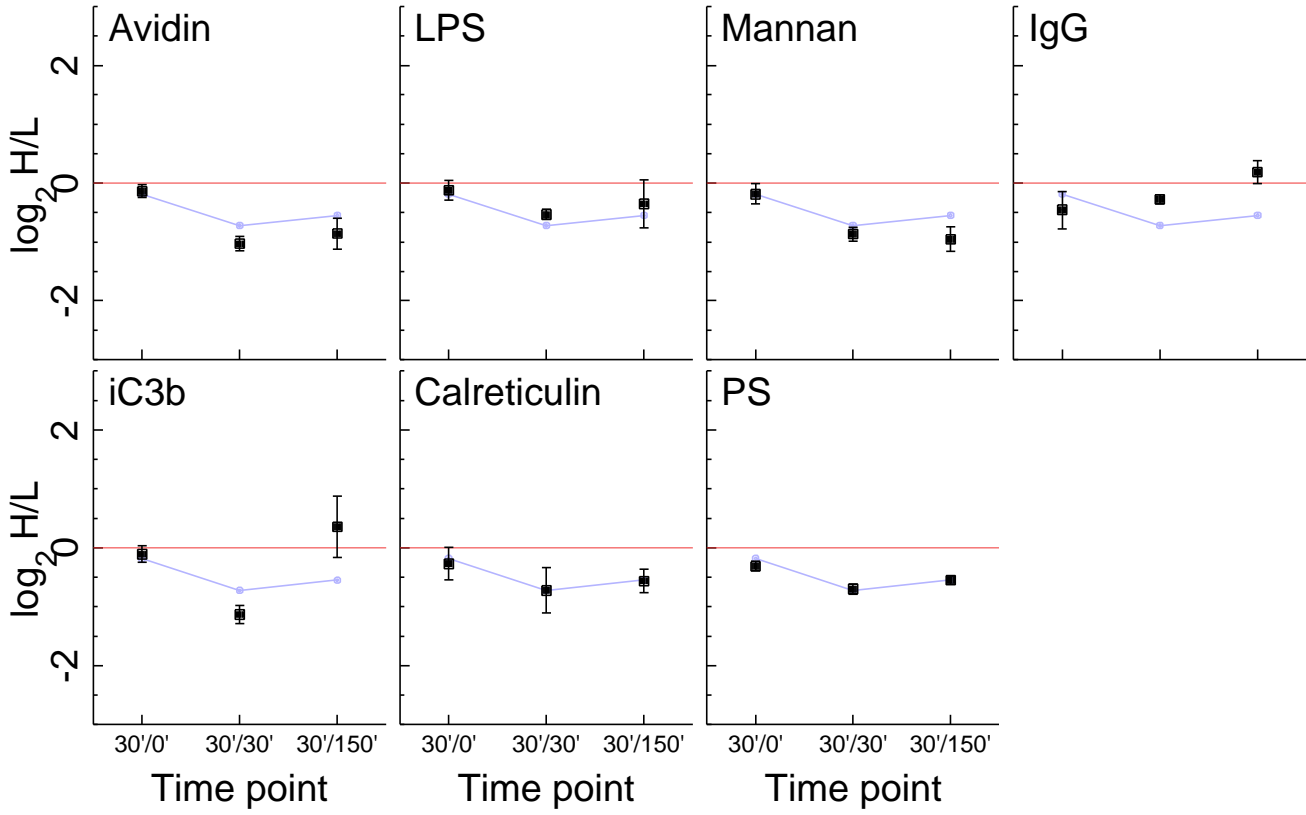

tpd52l2 (A2AUD5)

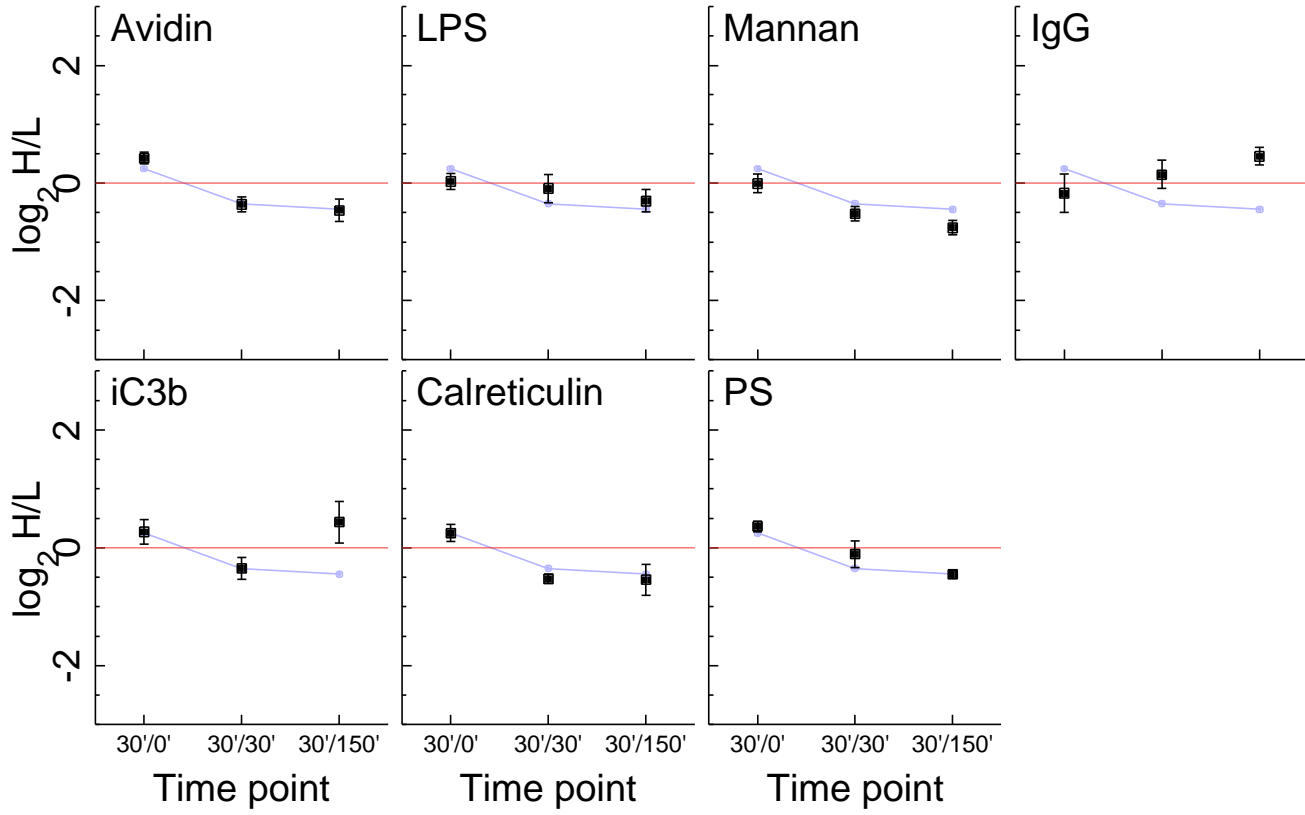

### tpi1 (P17751)

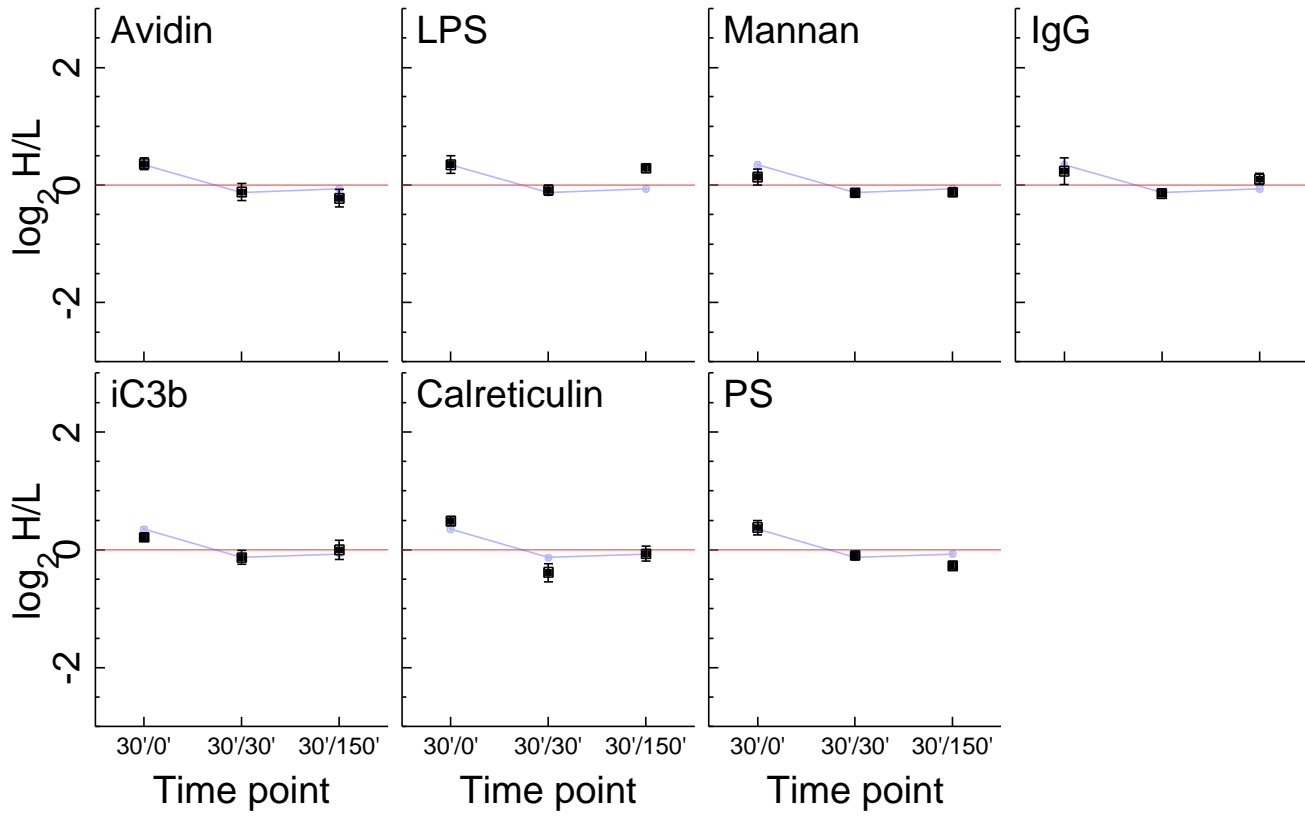

tpm3-rs7 (P21107)

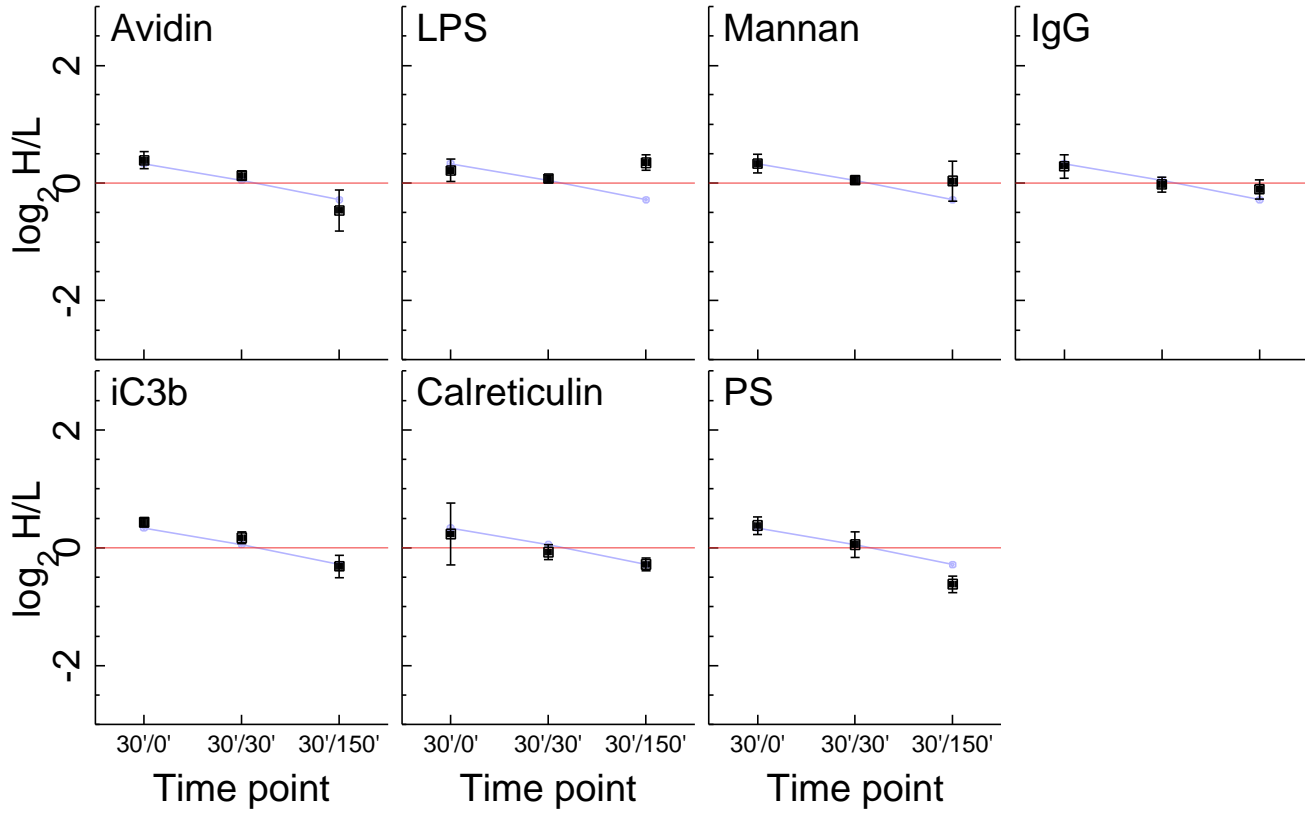

### tpm4 (Q6IRU2)

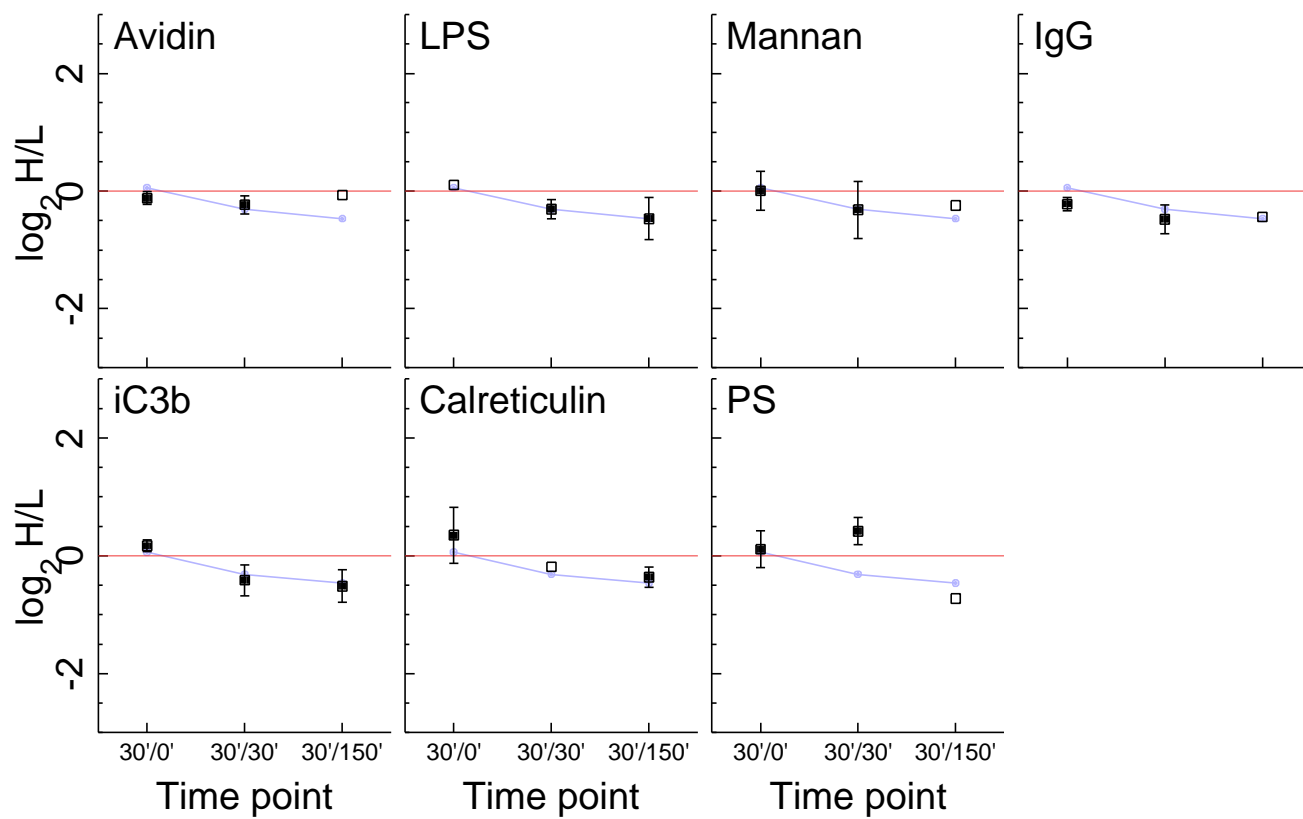

### tpp1 (O89023)

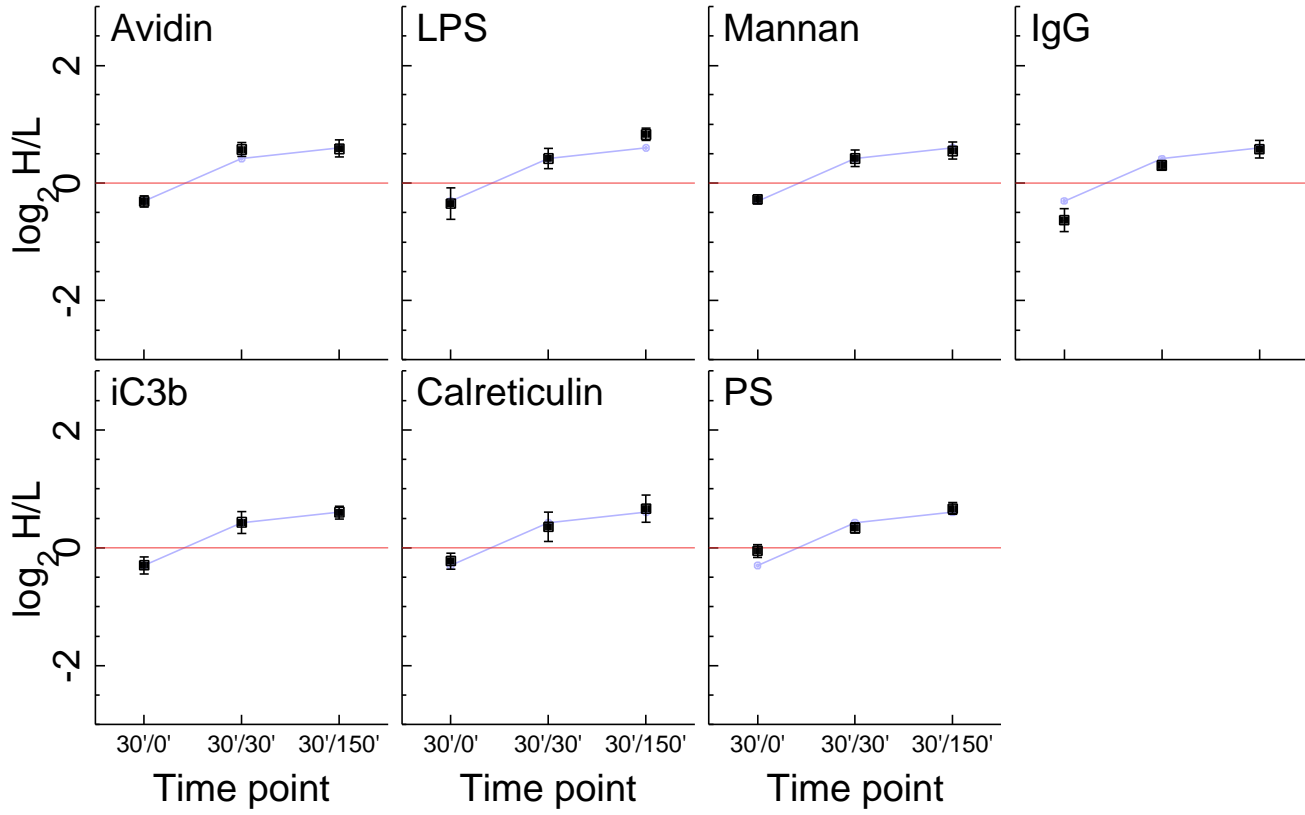

tpt1 (P63028)

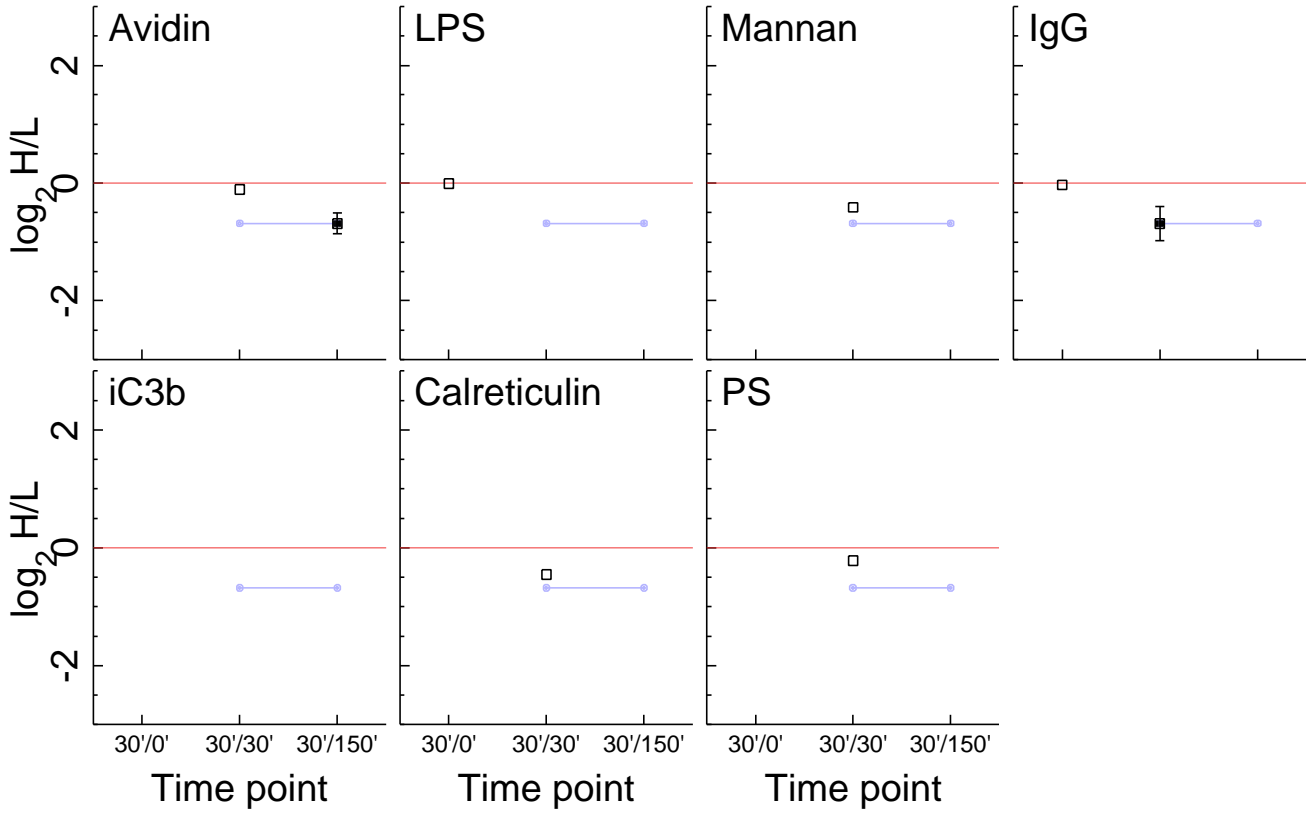



trafd1 (Q3UDK1)

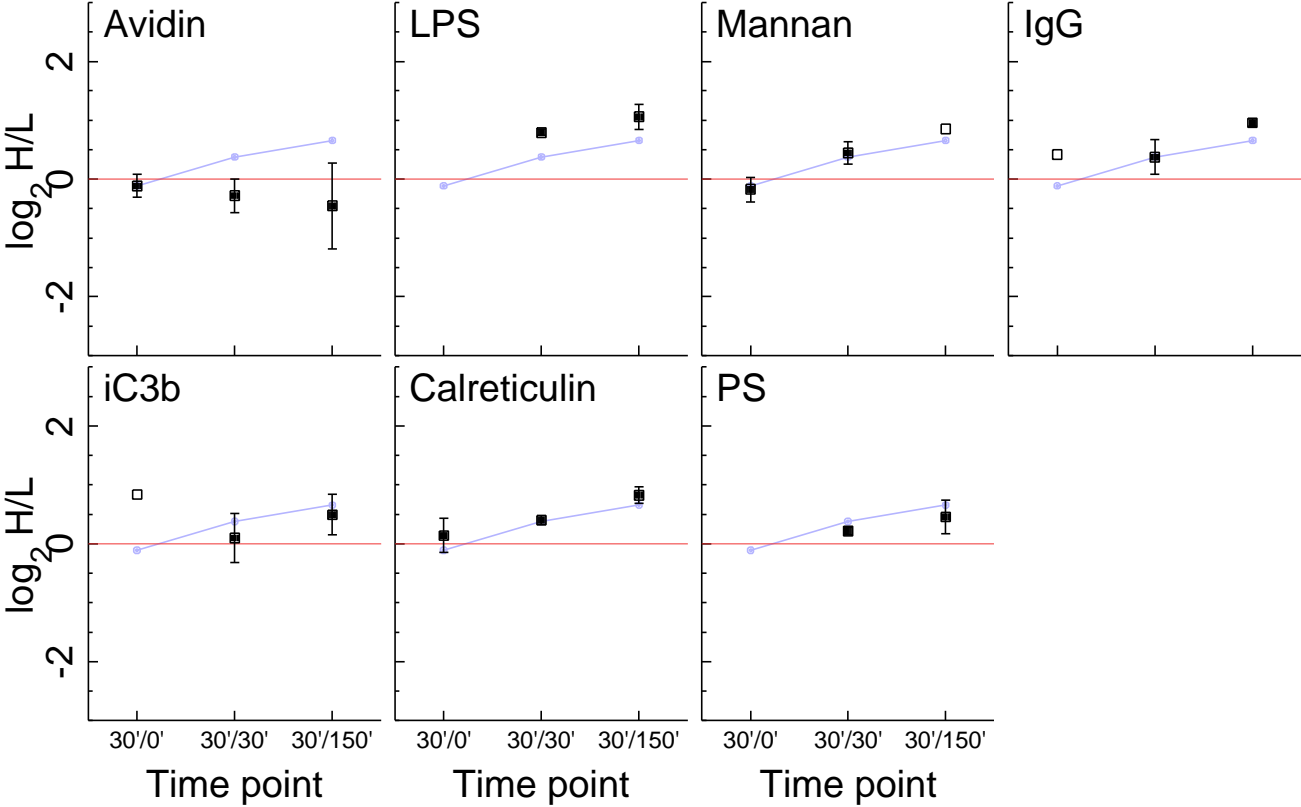

### trem2 (Q99NH8)

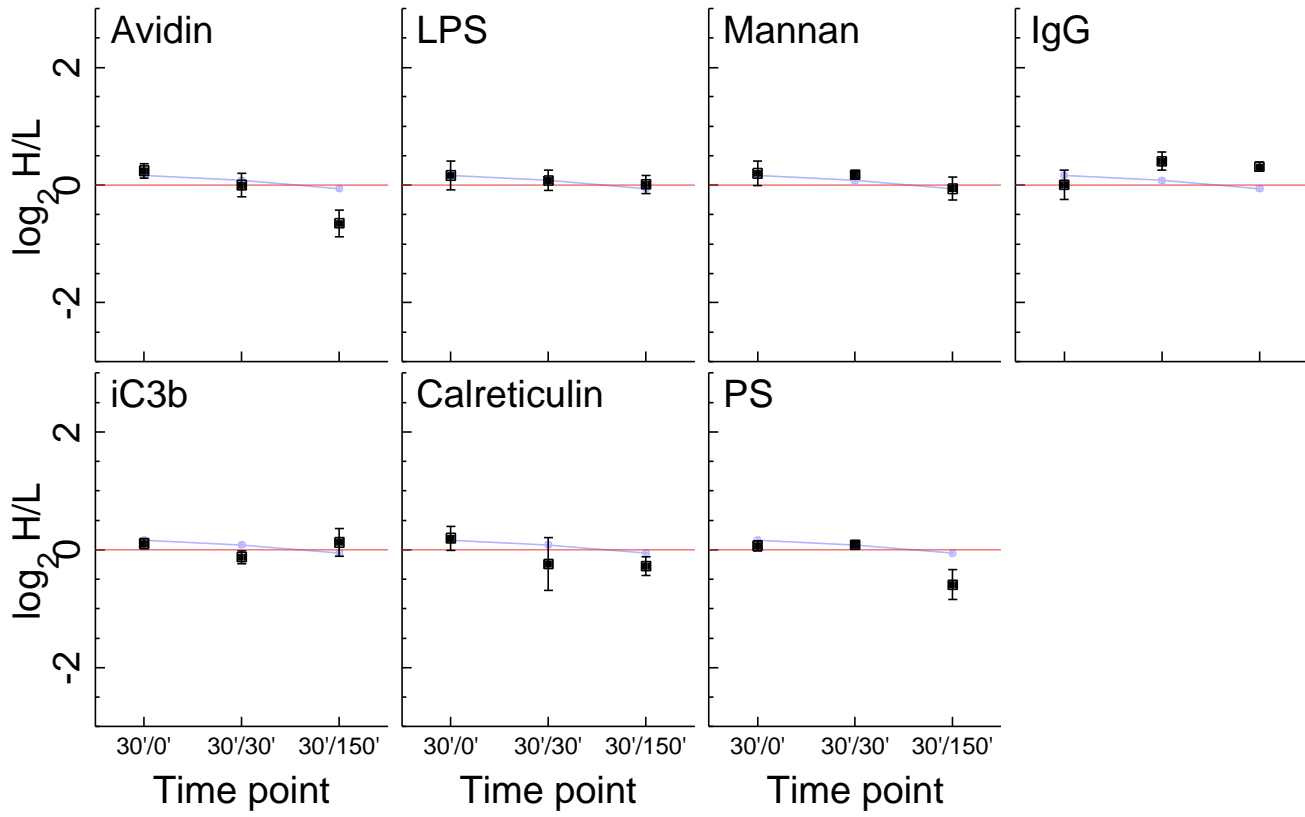

trex1 (Q91XB0)

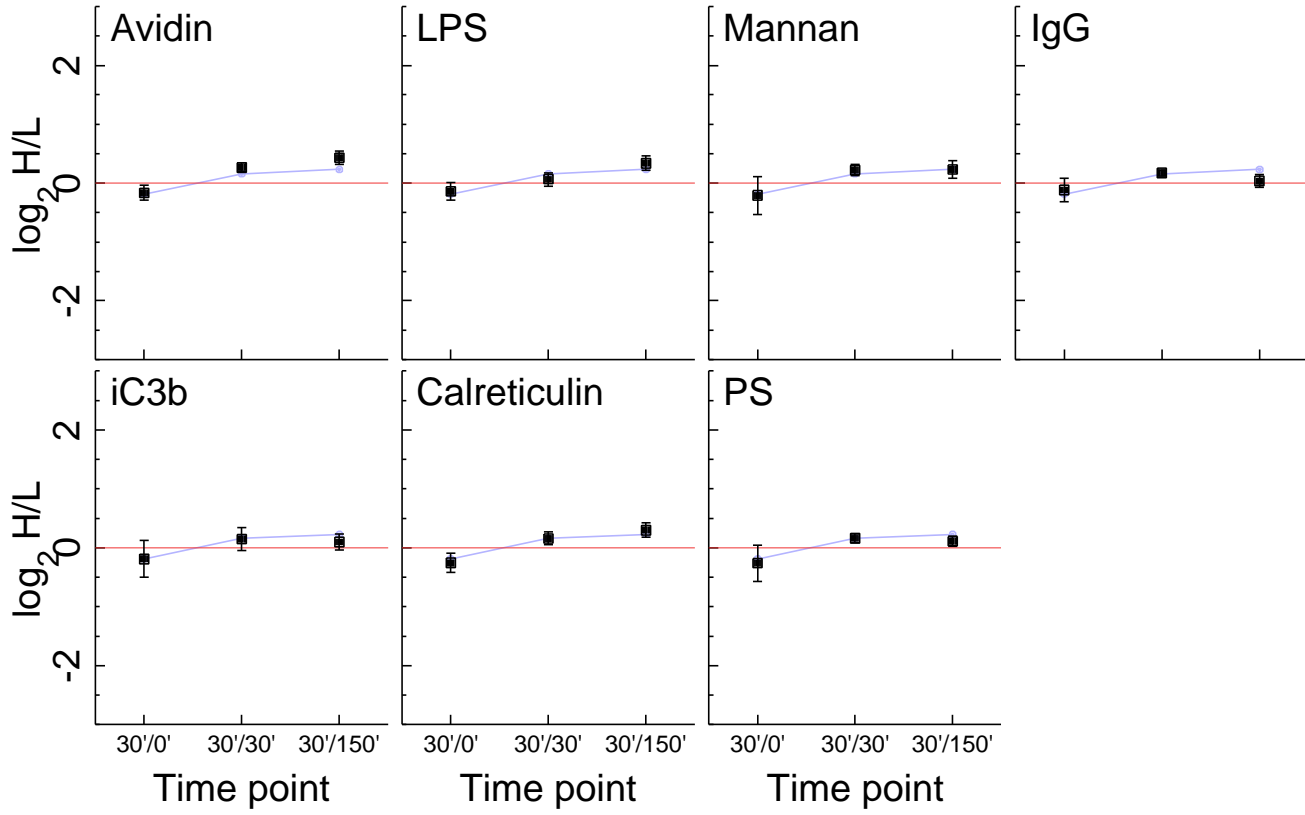

### trim14 (Q8BVW3)

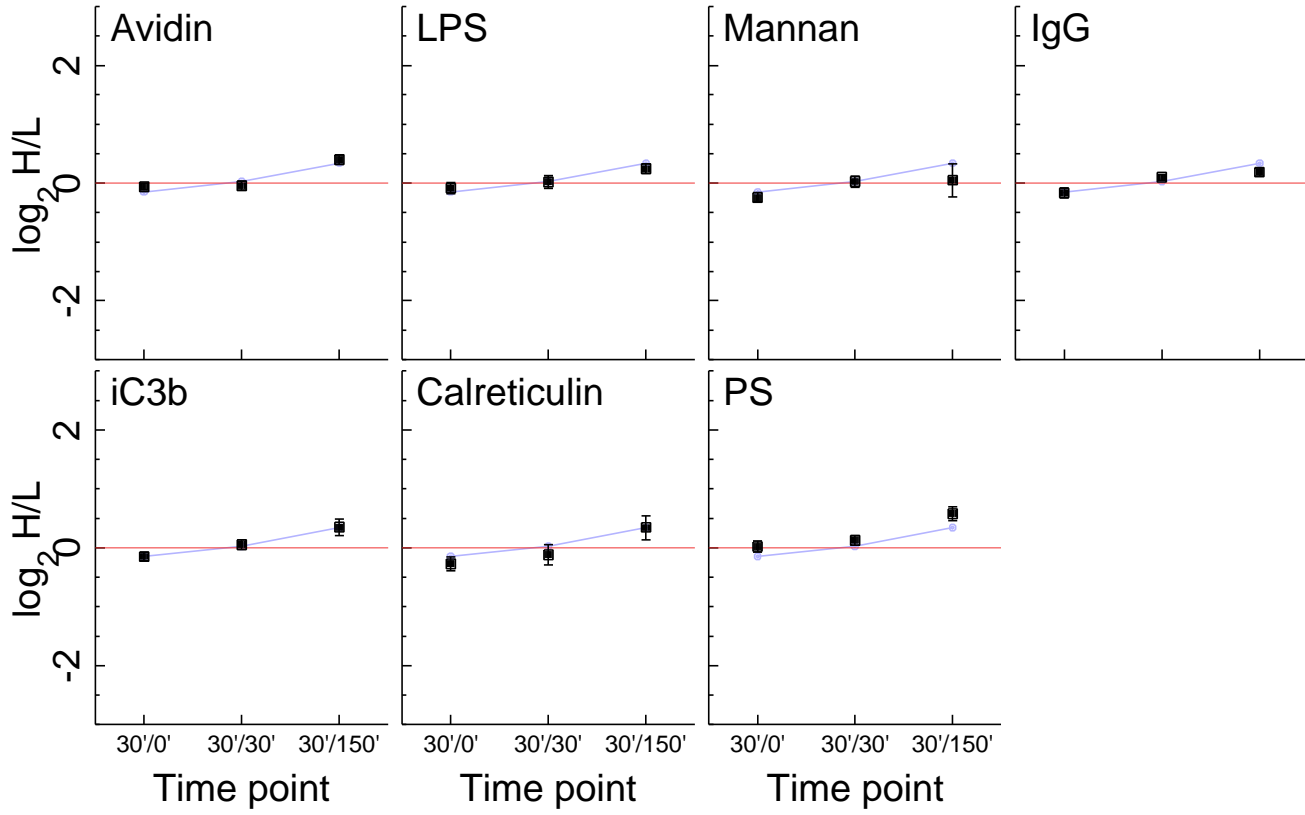

trim21 (Q3U7K7)

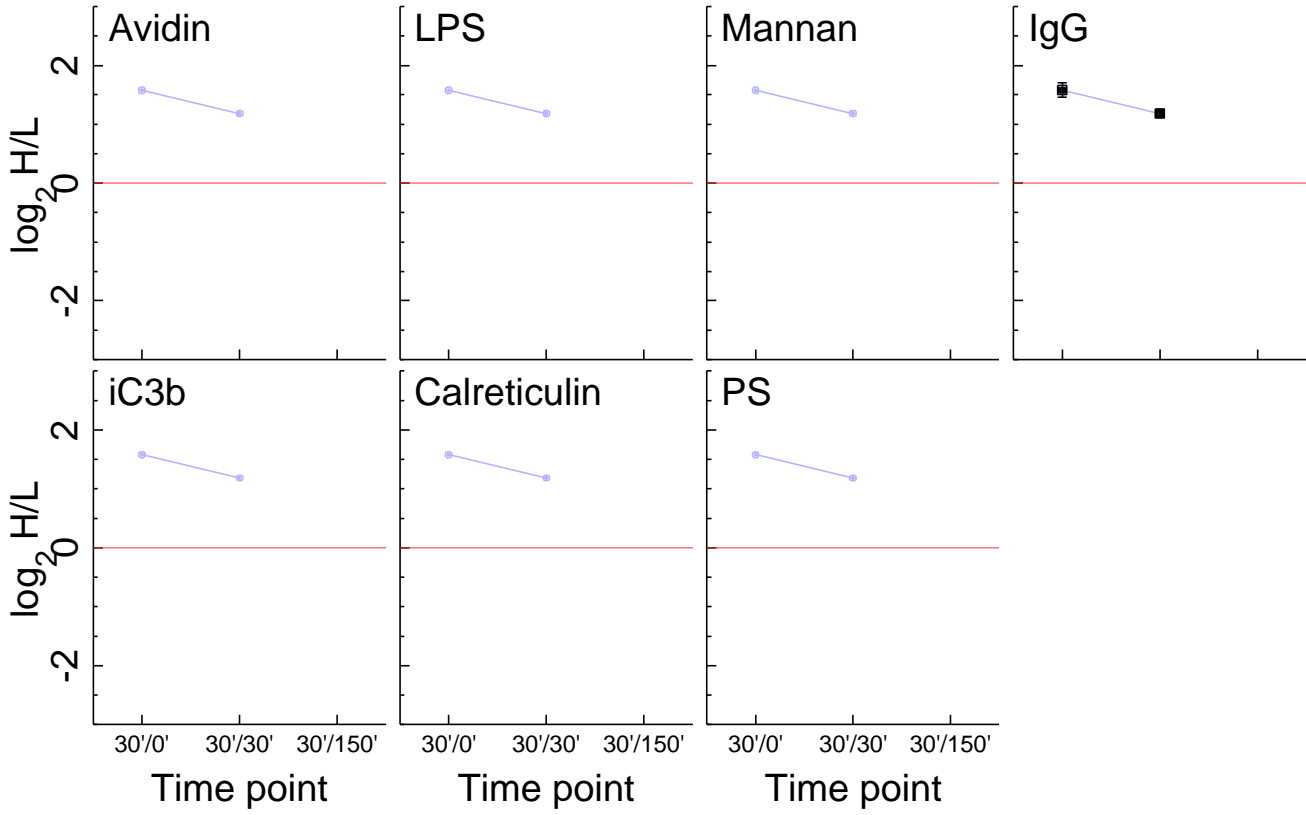

trim23 (Q8BGX0)

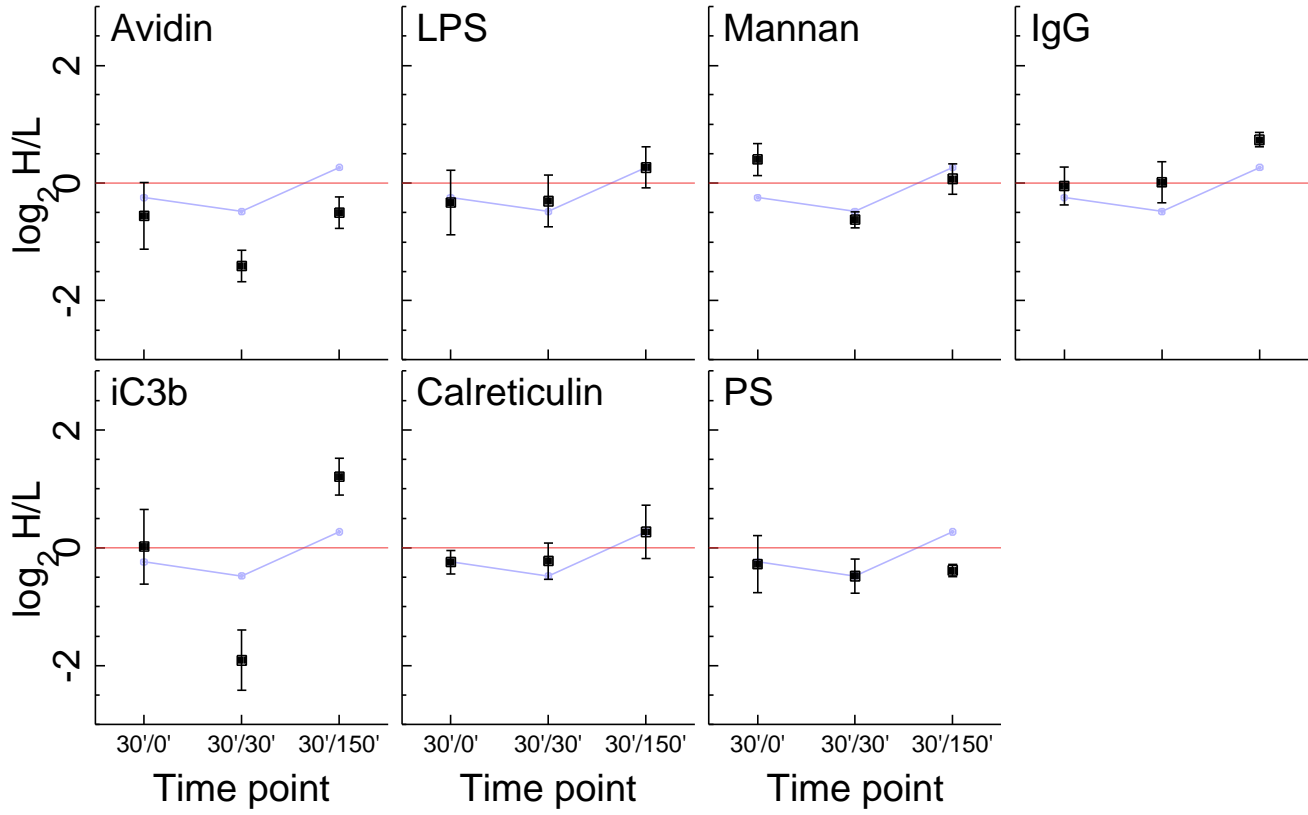

trim28 (Q62318)

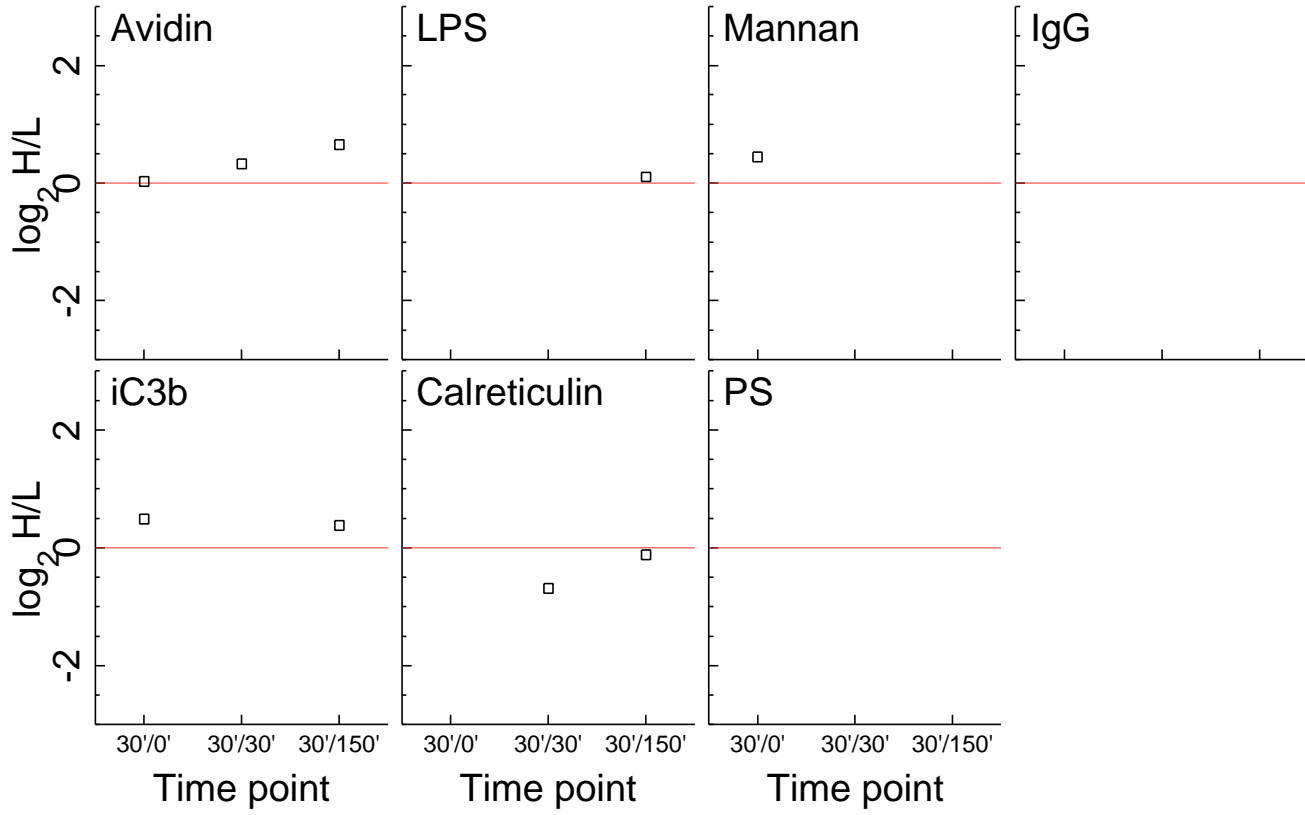

trpv2 (Q9WTR1)

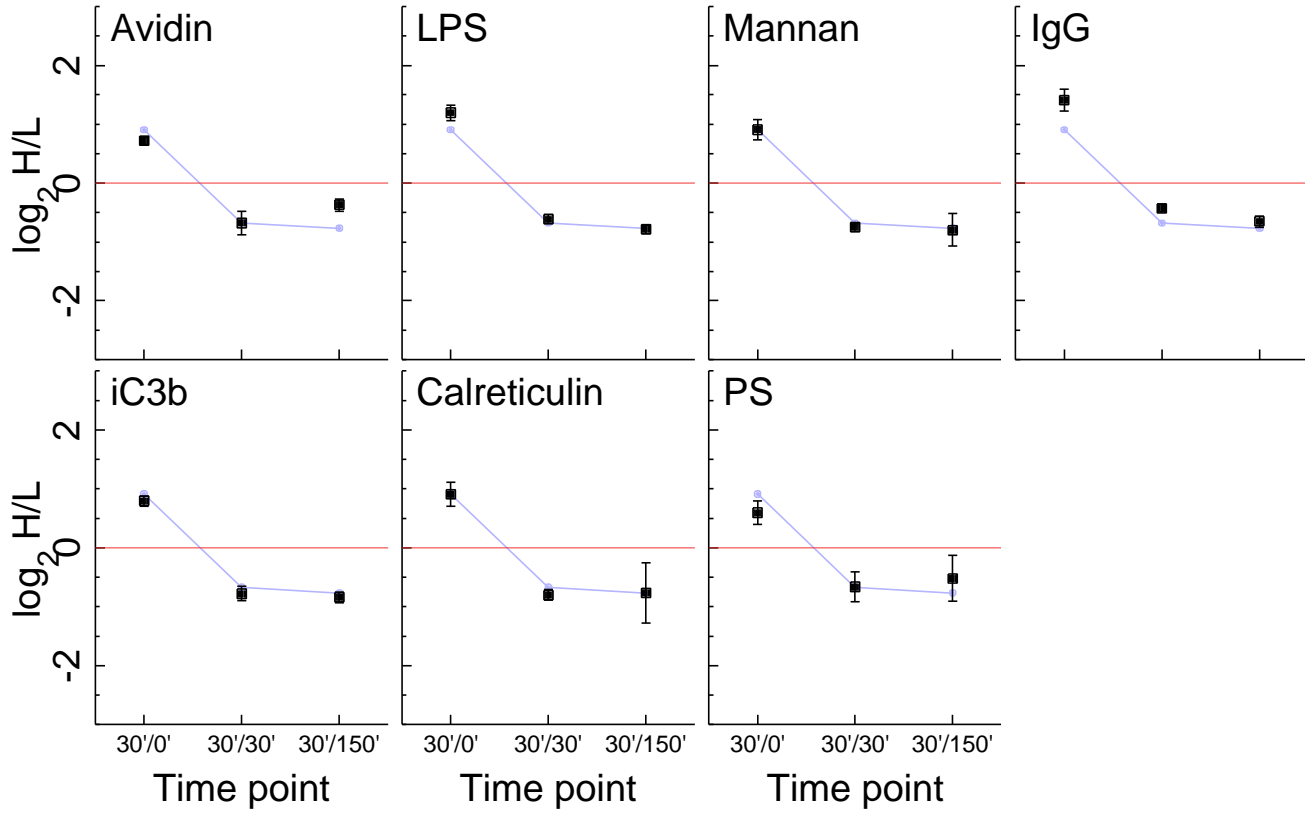



tsen34 (Q8BMZ5)

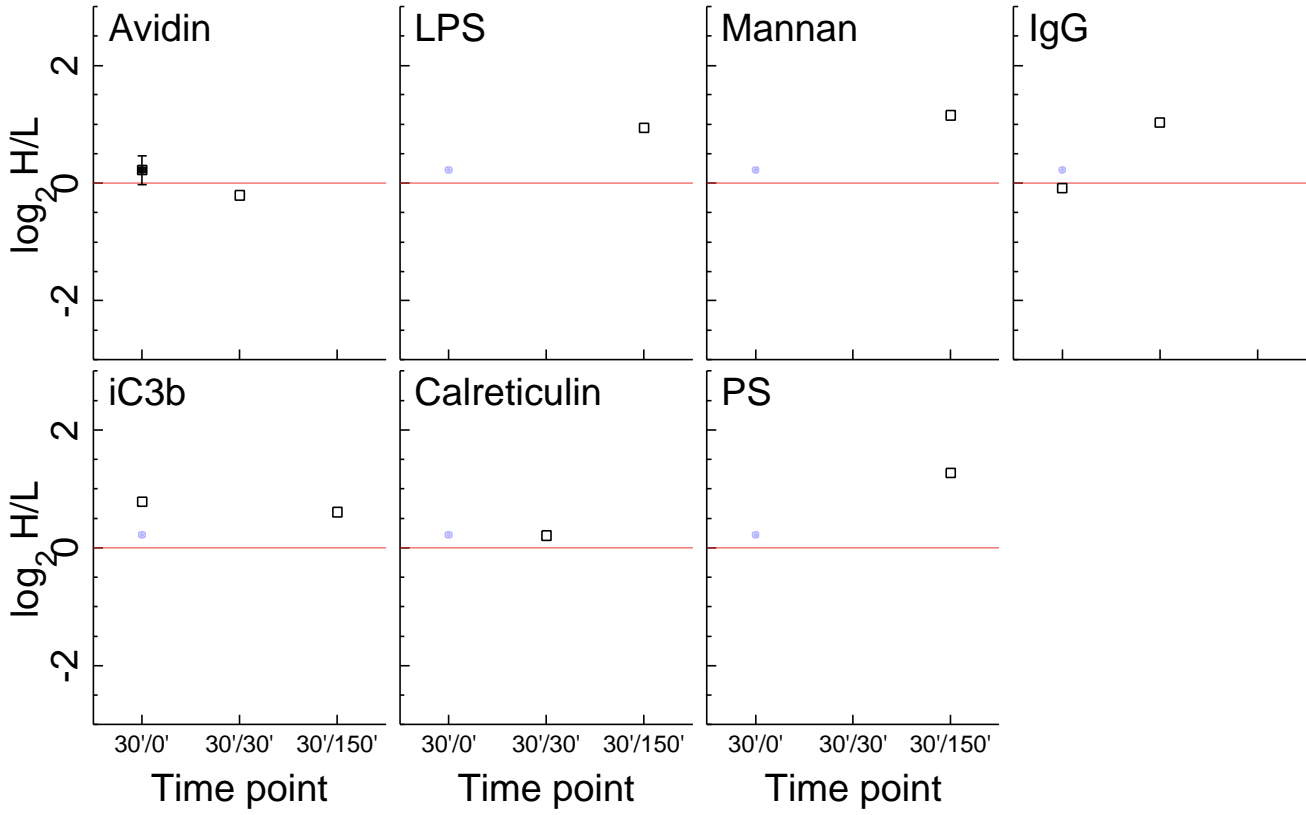

tsg101 (Q61187)

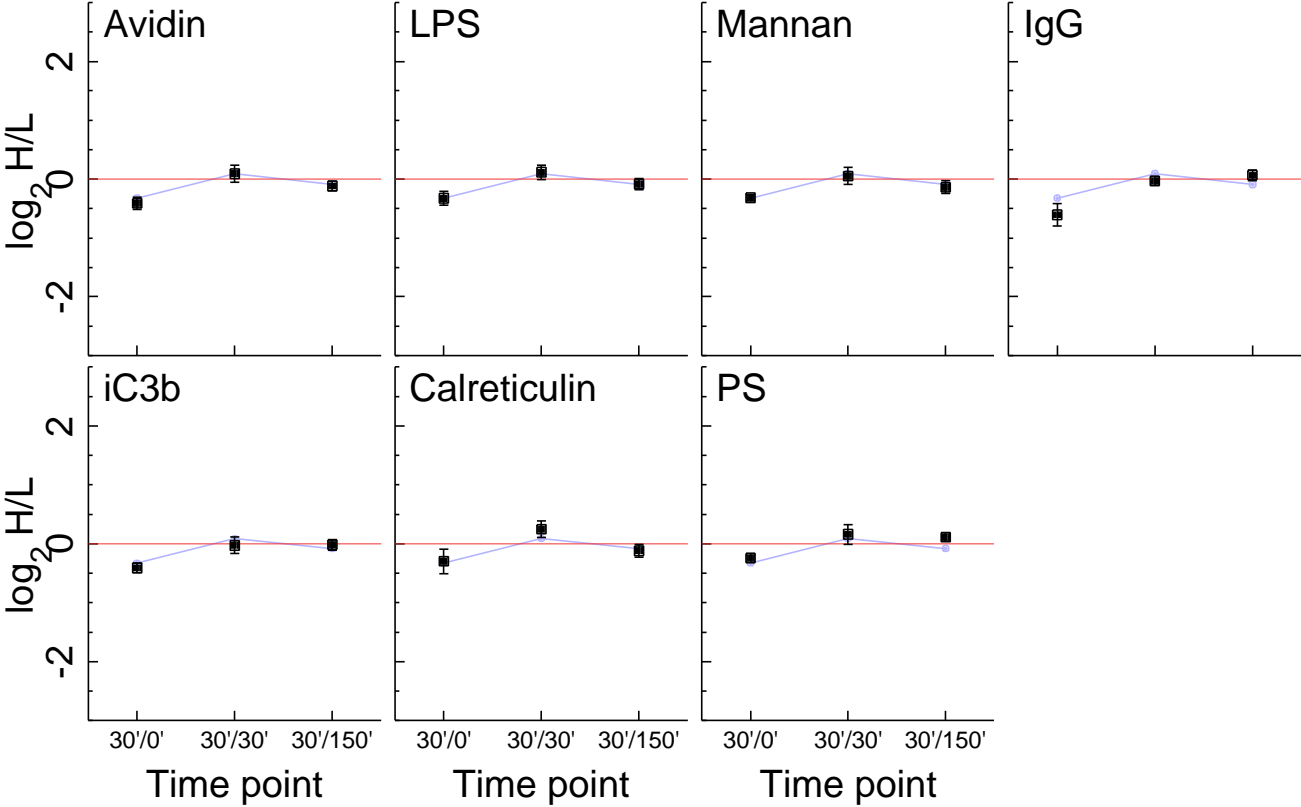

tspan14 (Q8QZY6)

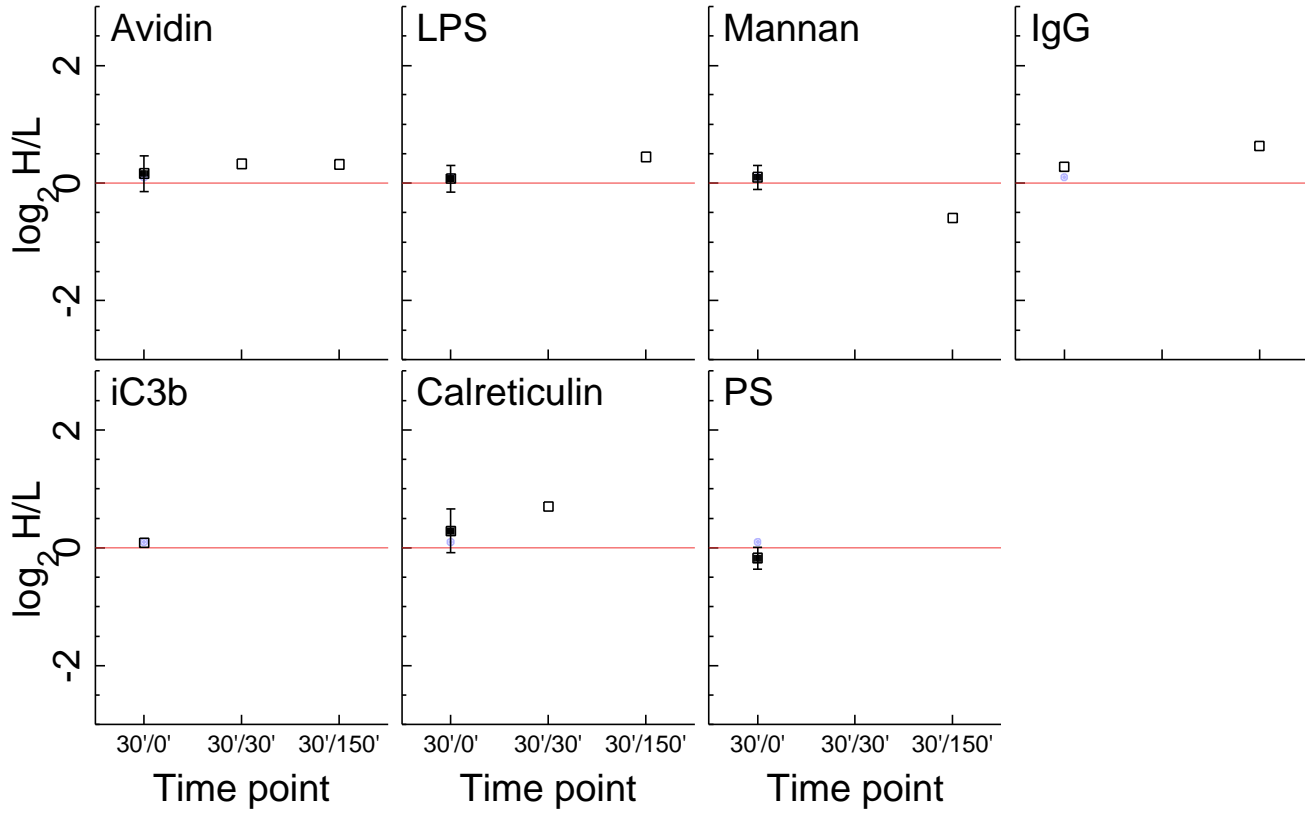

tspan31 (Q9CQ88)

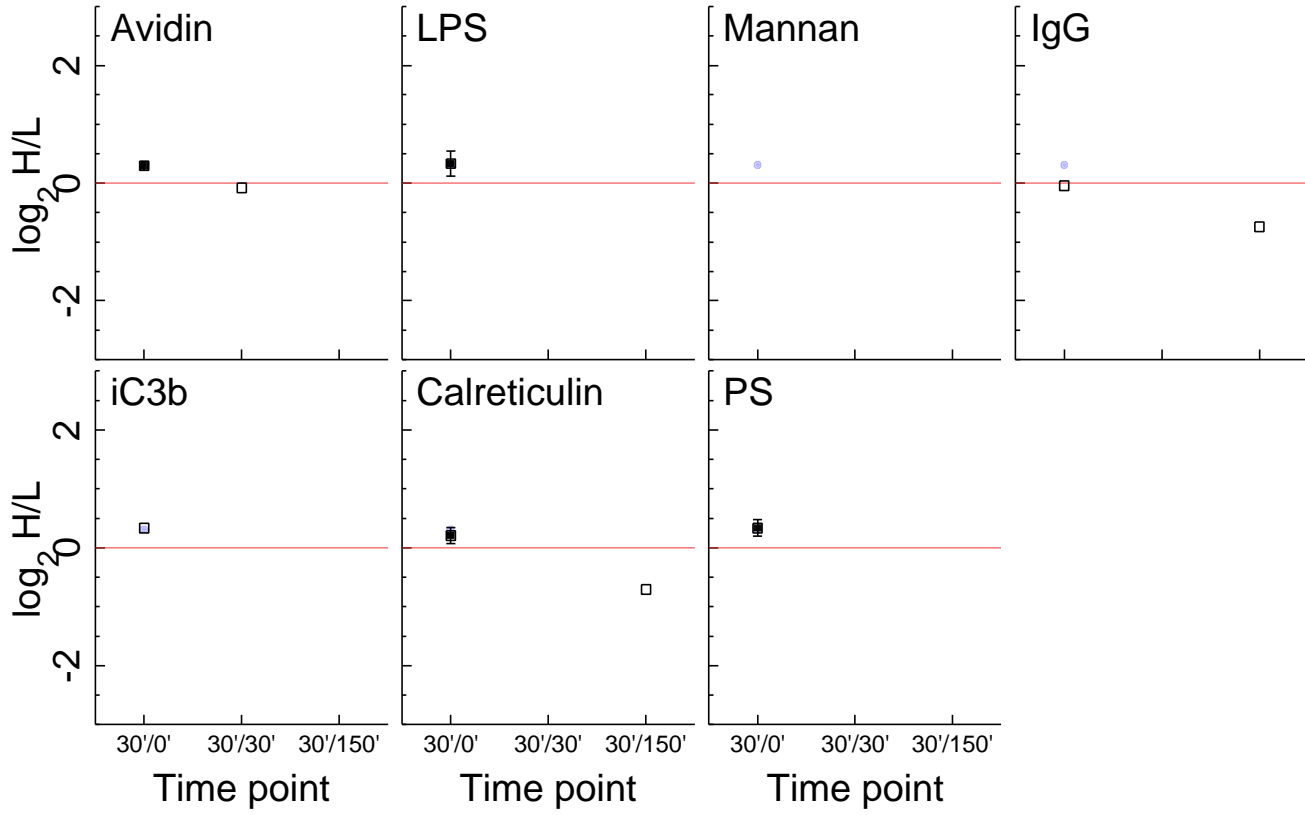

ttc35 (Q9CRD2)

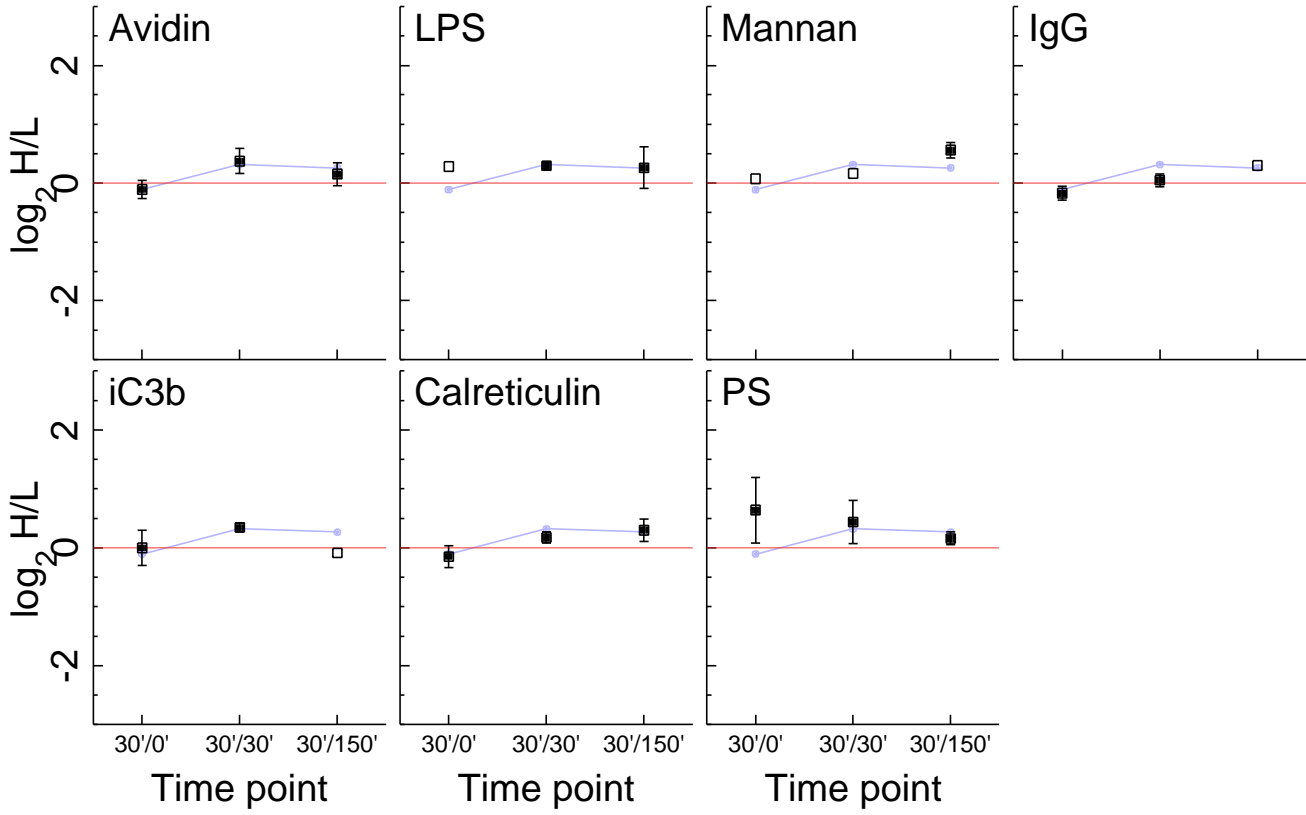

ttk (P35761)

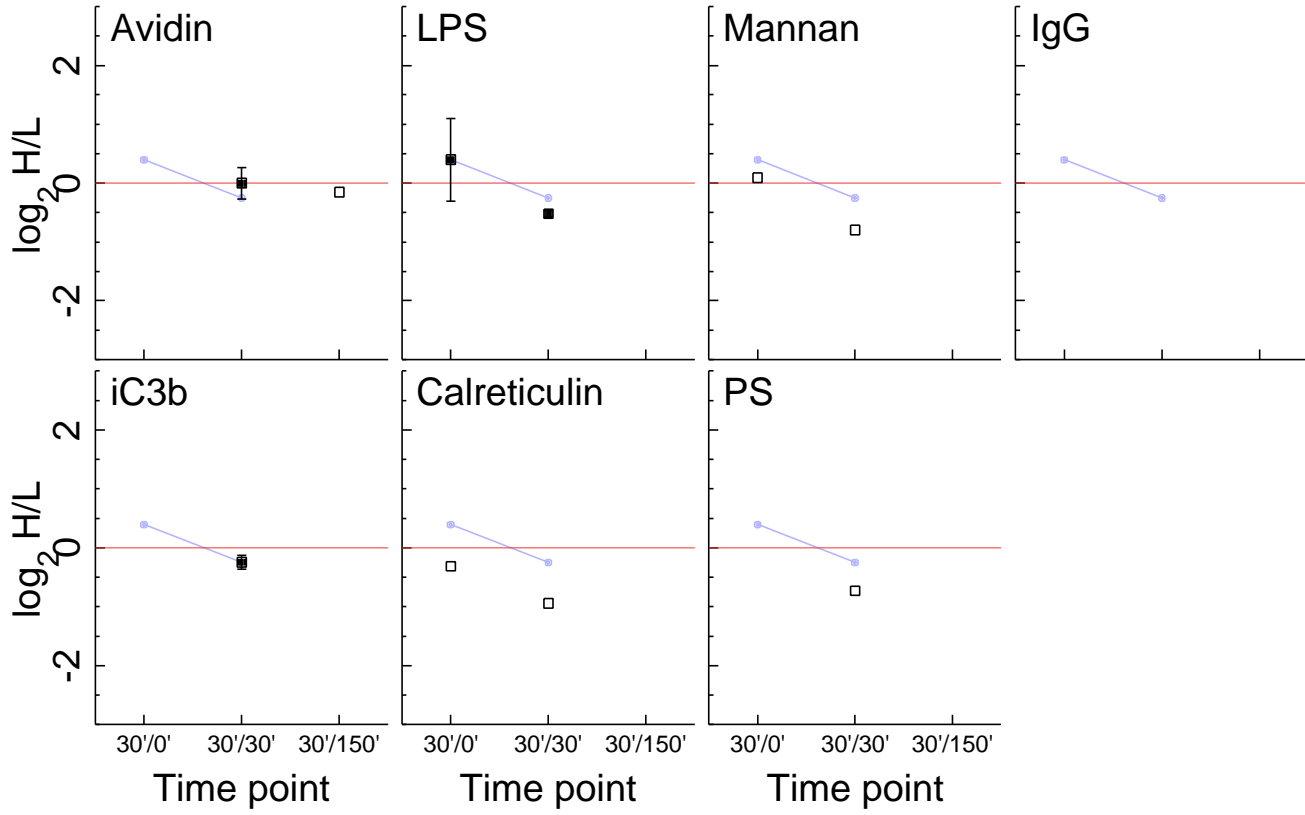

ttn (A2ASS6)

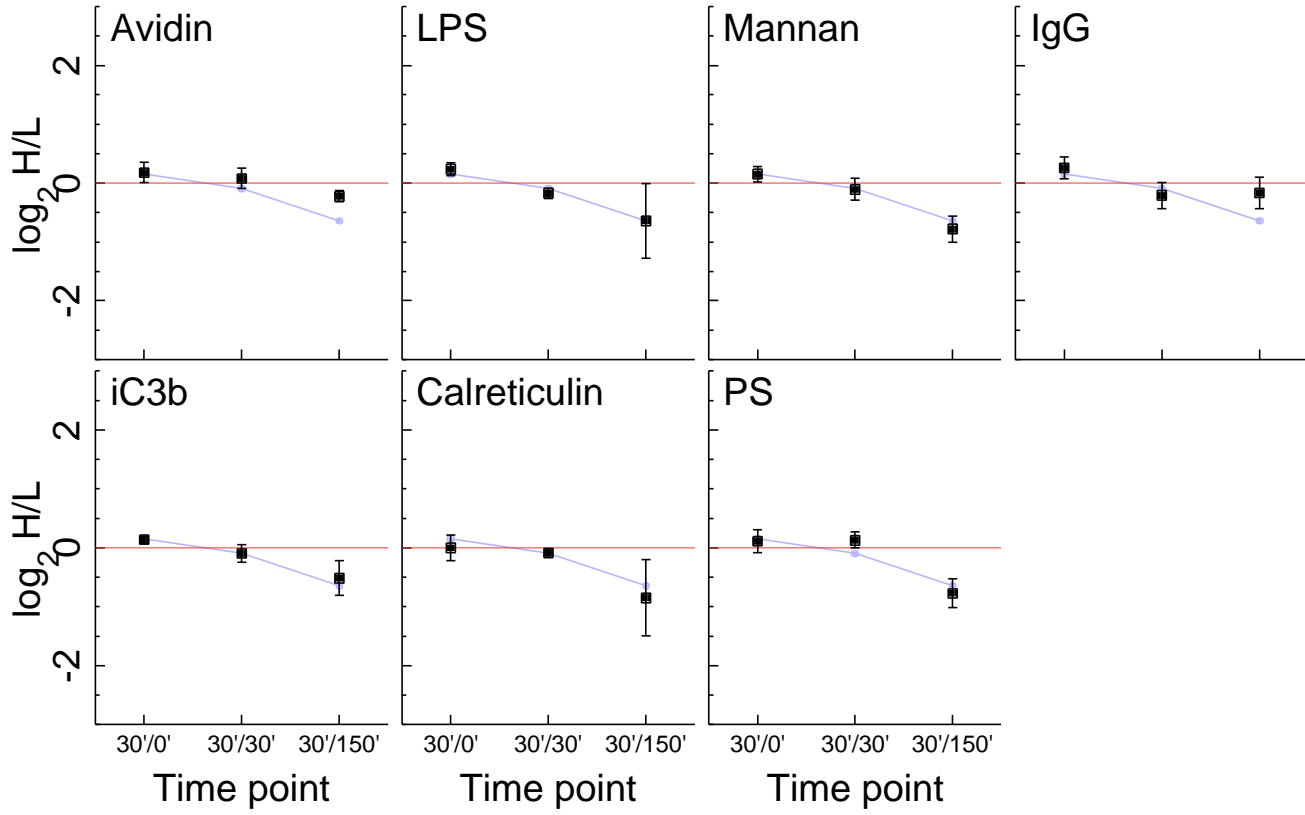

ttyh2 (Q3TH73)

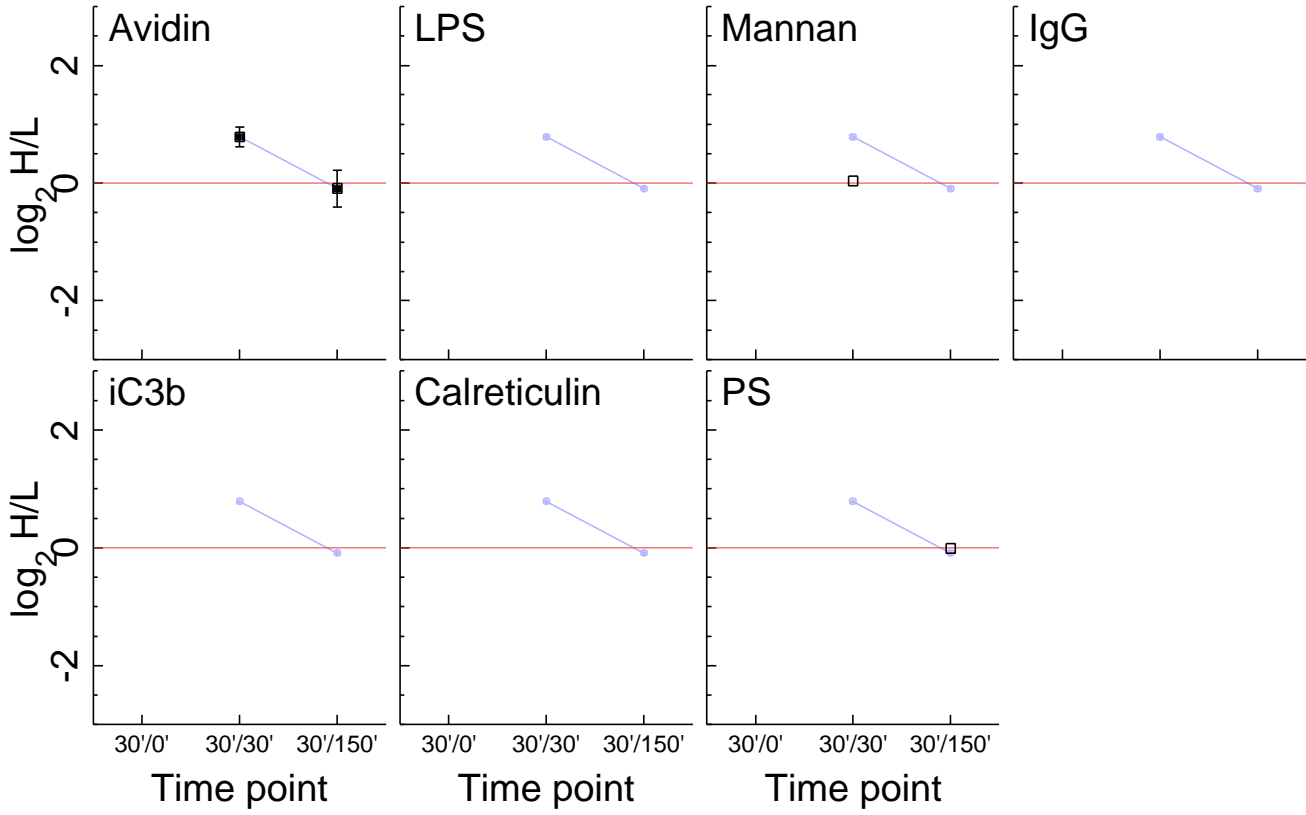



ttyh3 (Q6P5F7)

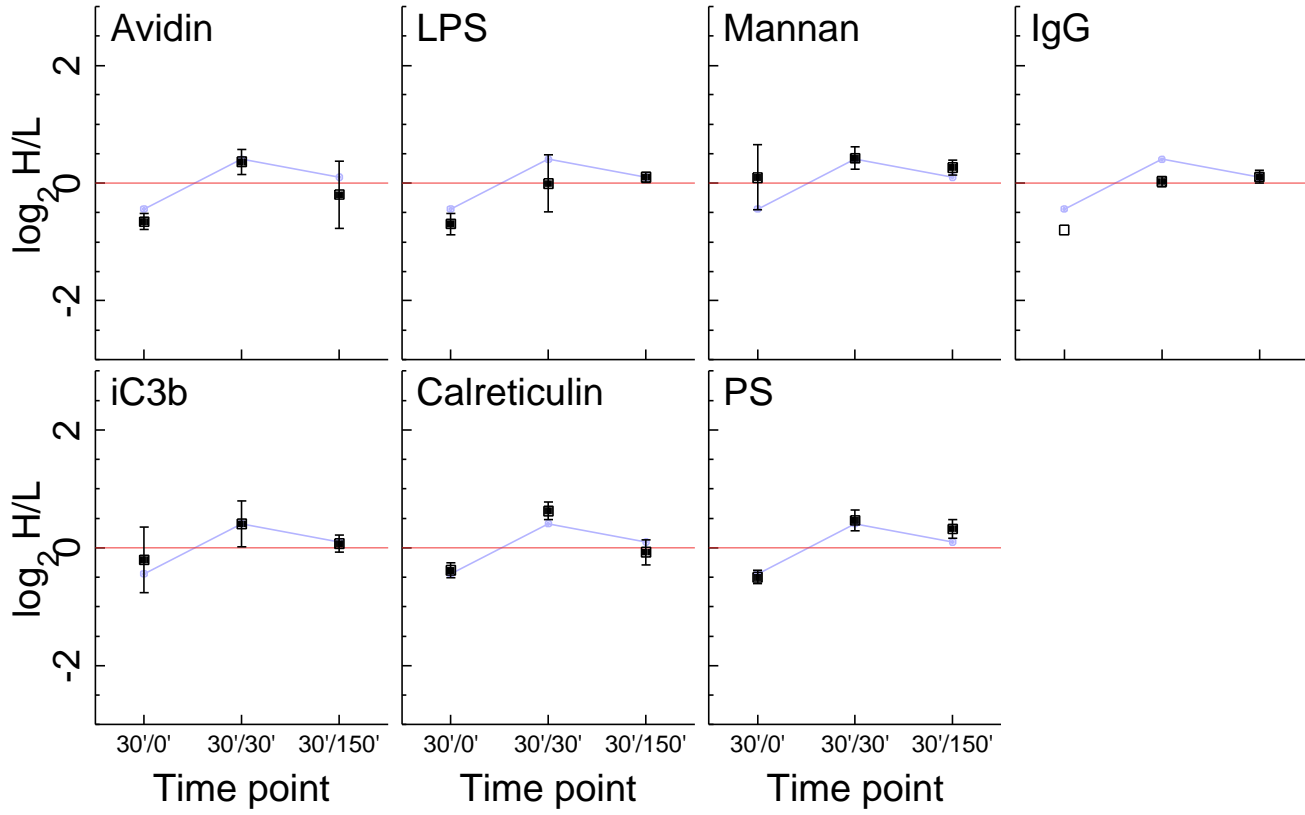

tuba1a (P68369)

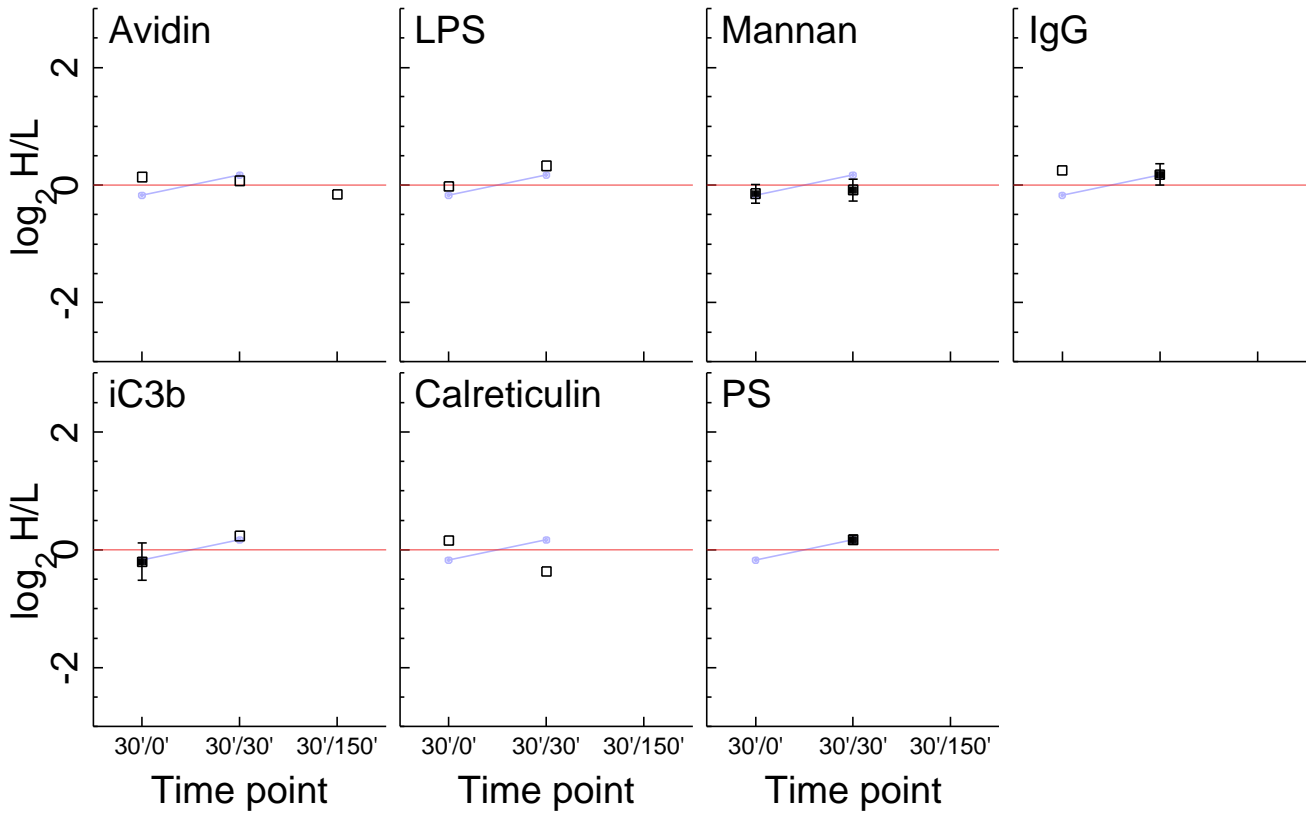

tuba1b (P05213)

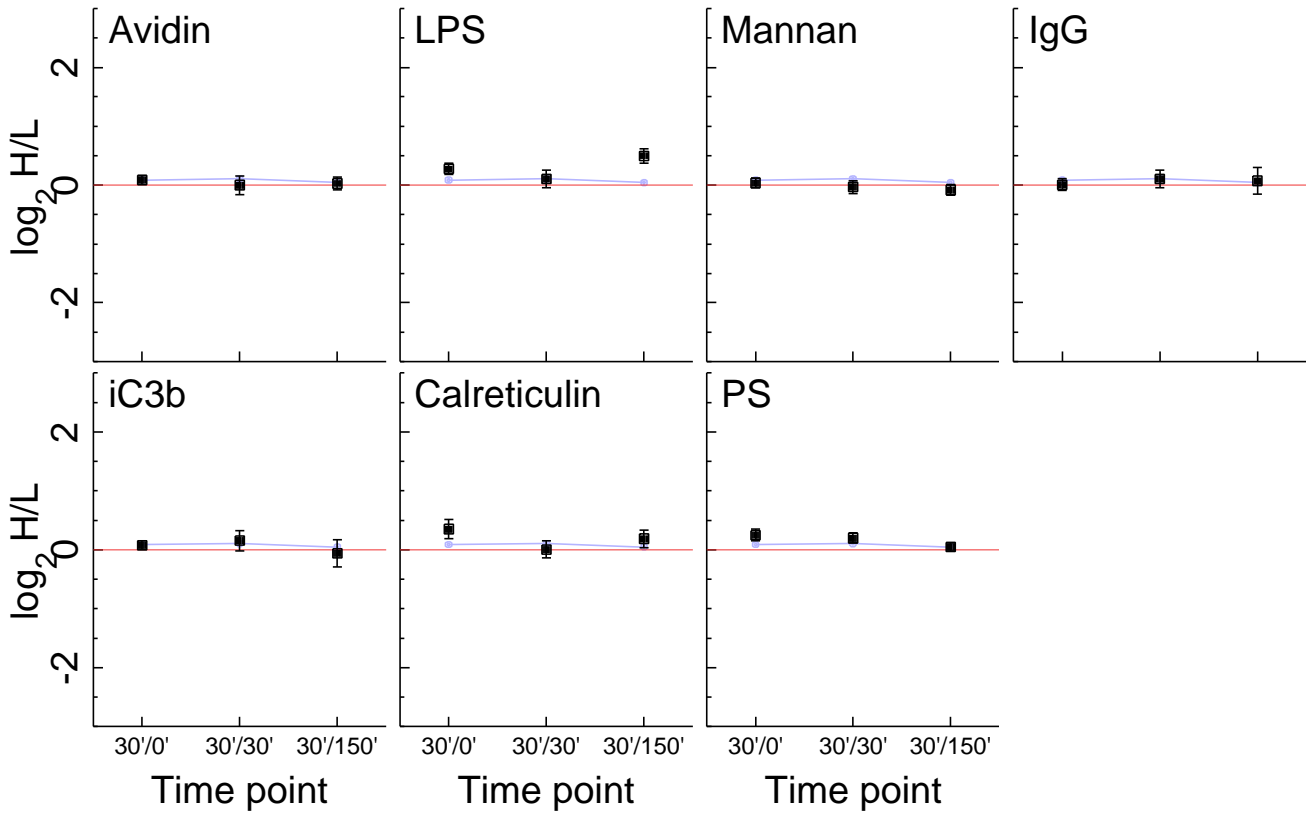

tuba4a (P68368)

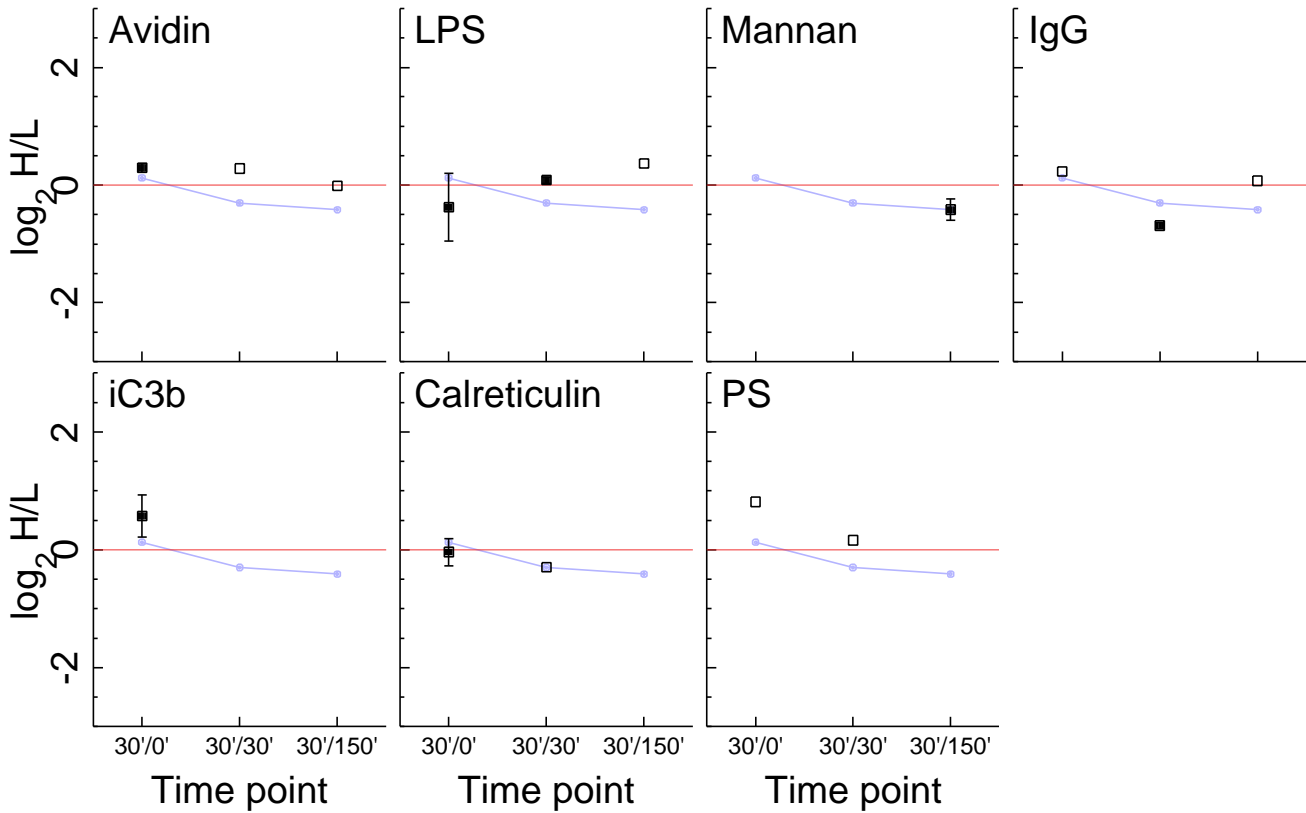

tubb4b (P68372)

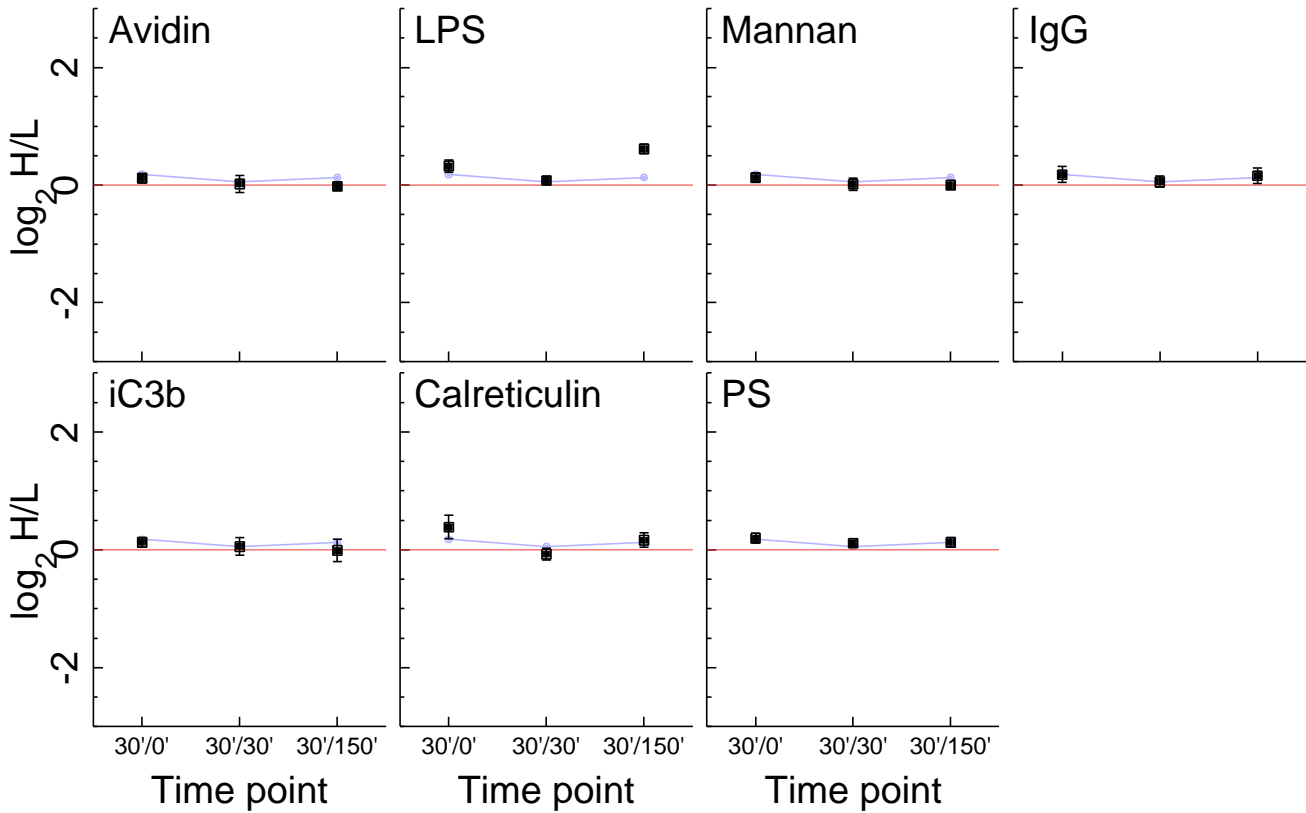

tubb5 (P99024)

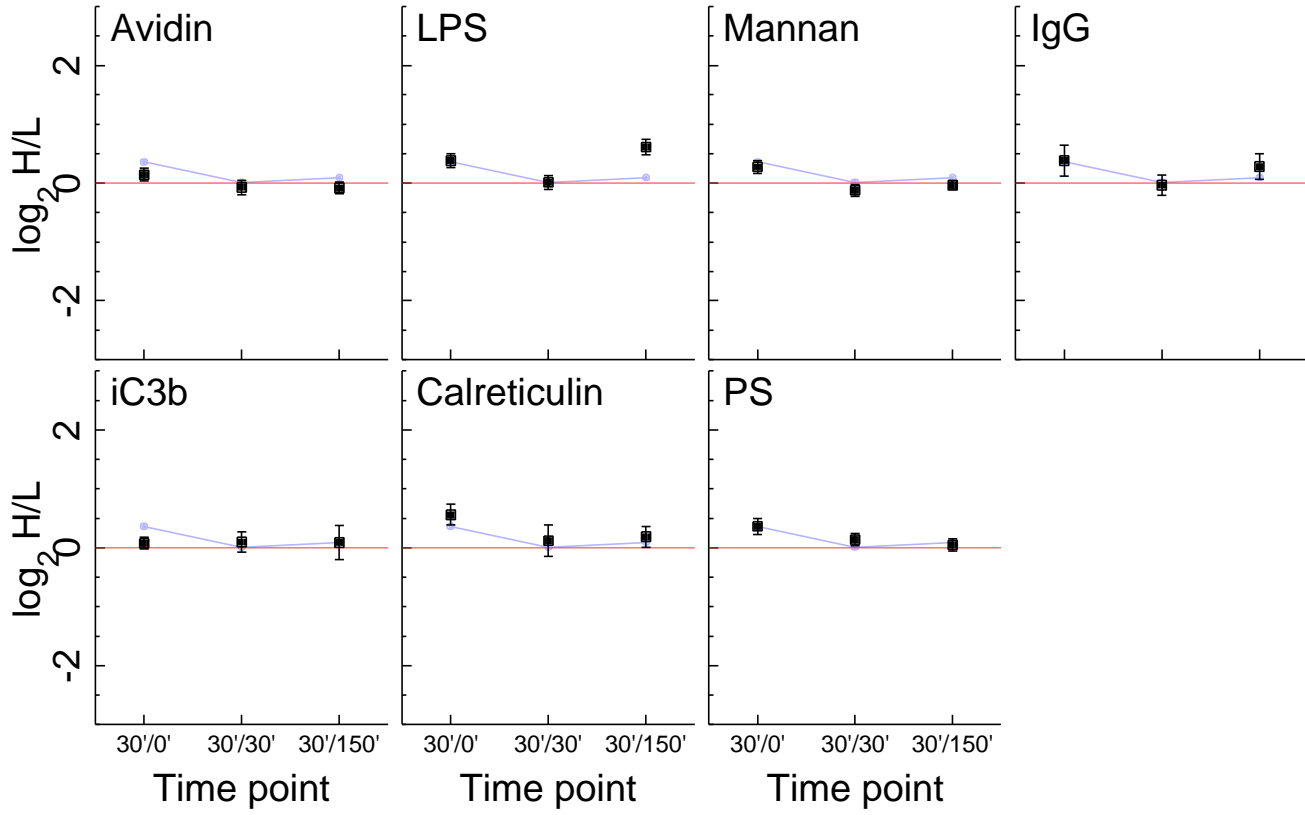

txndc12 (Q9CQU0)

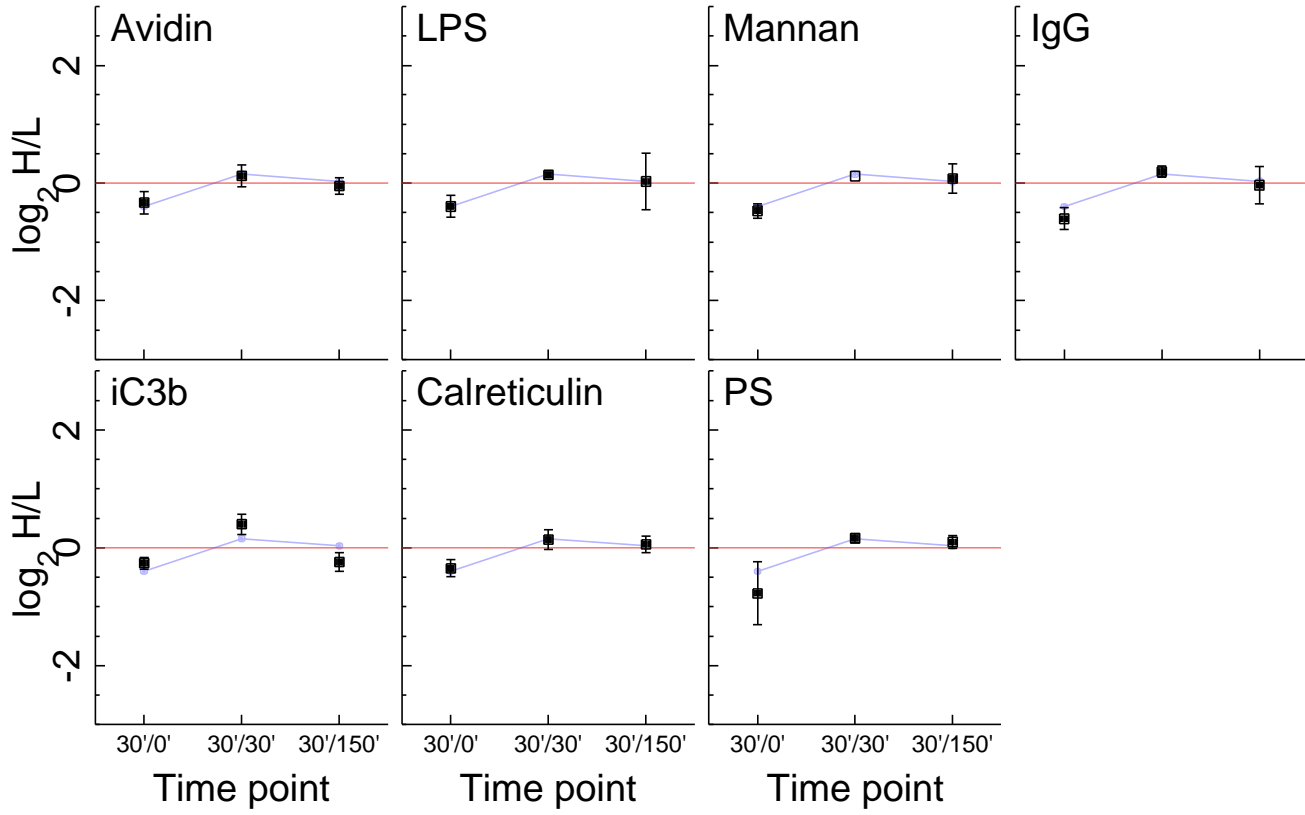

txndc5 (Q91W90)

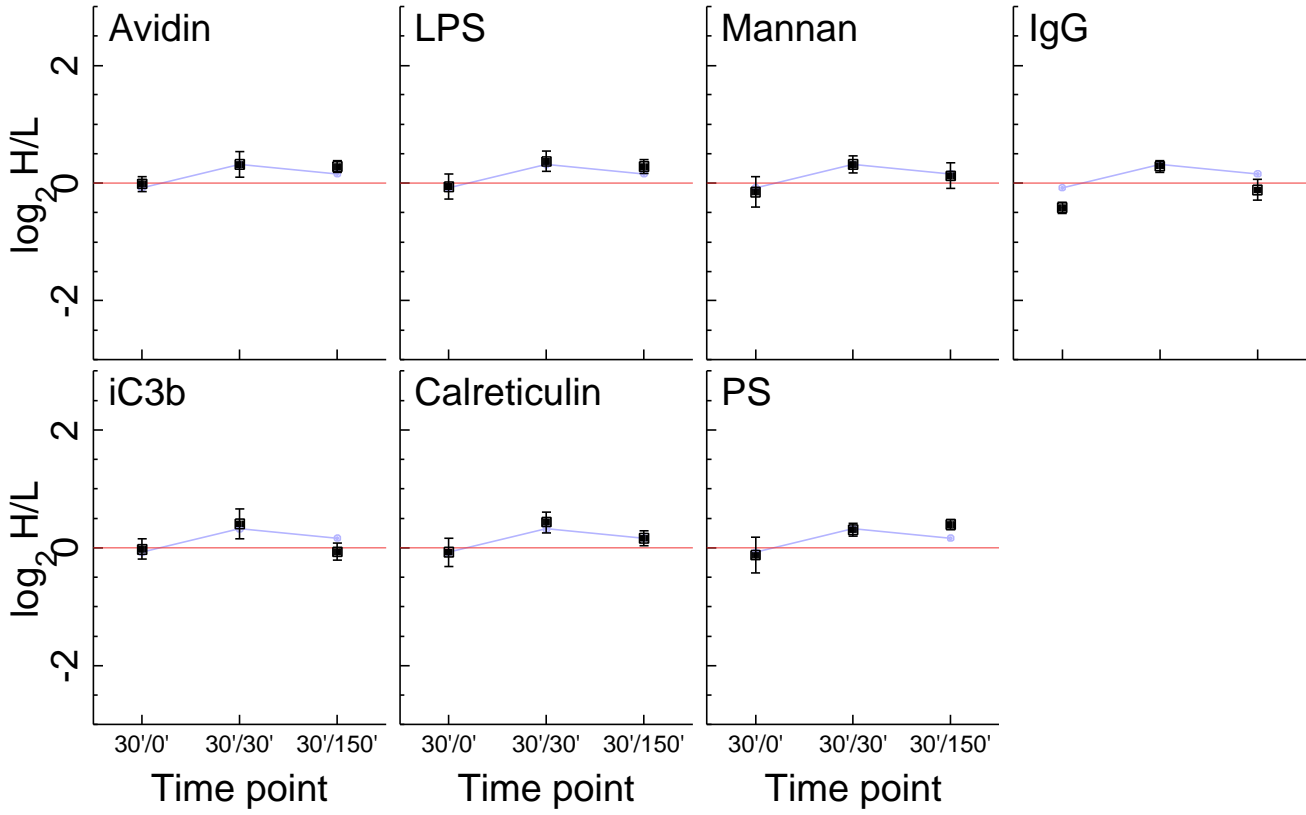



txn (P10639)

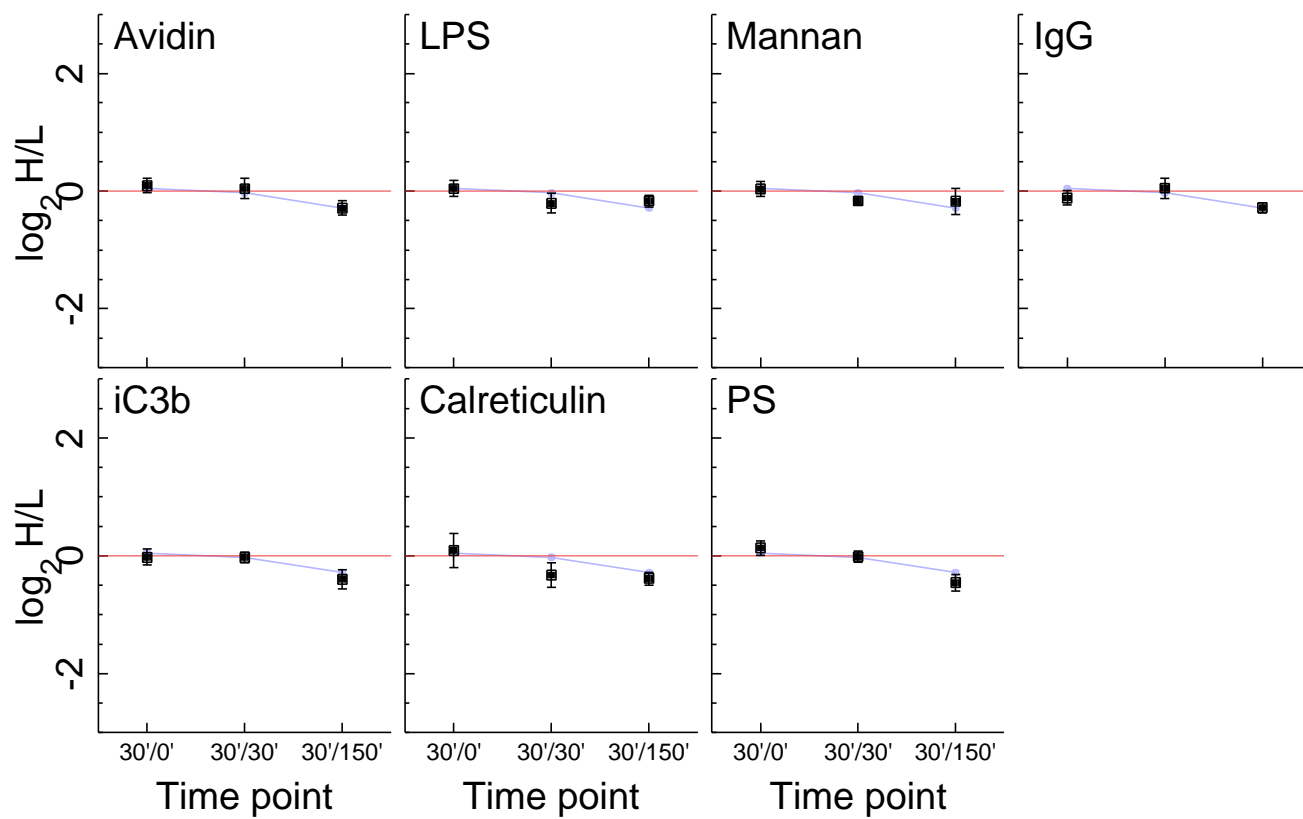

### tyrobp (O54885)

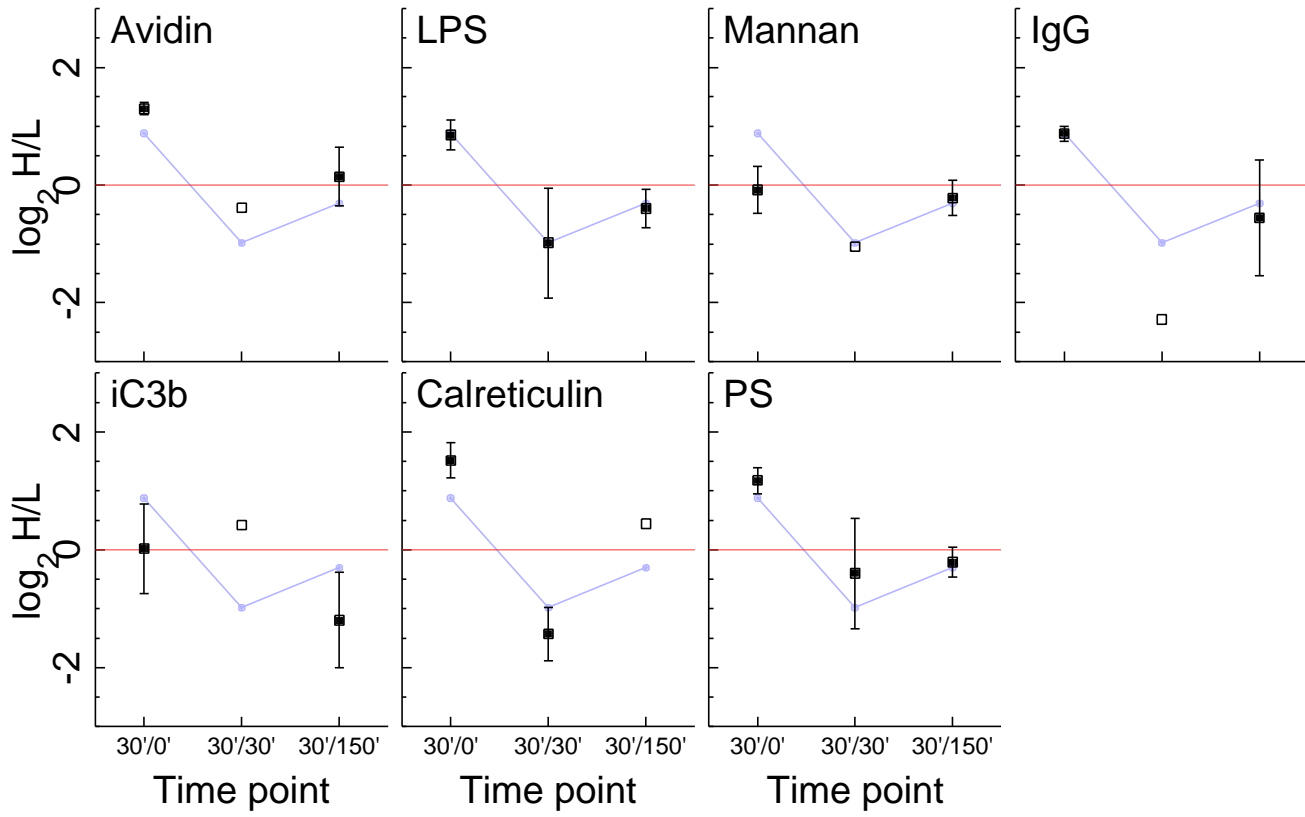

### uba1 (Q02053)

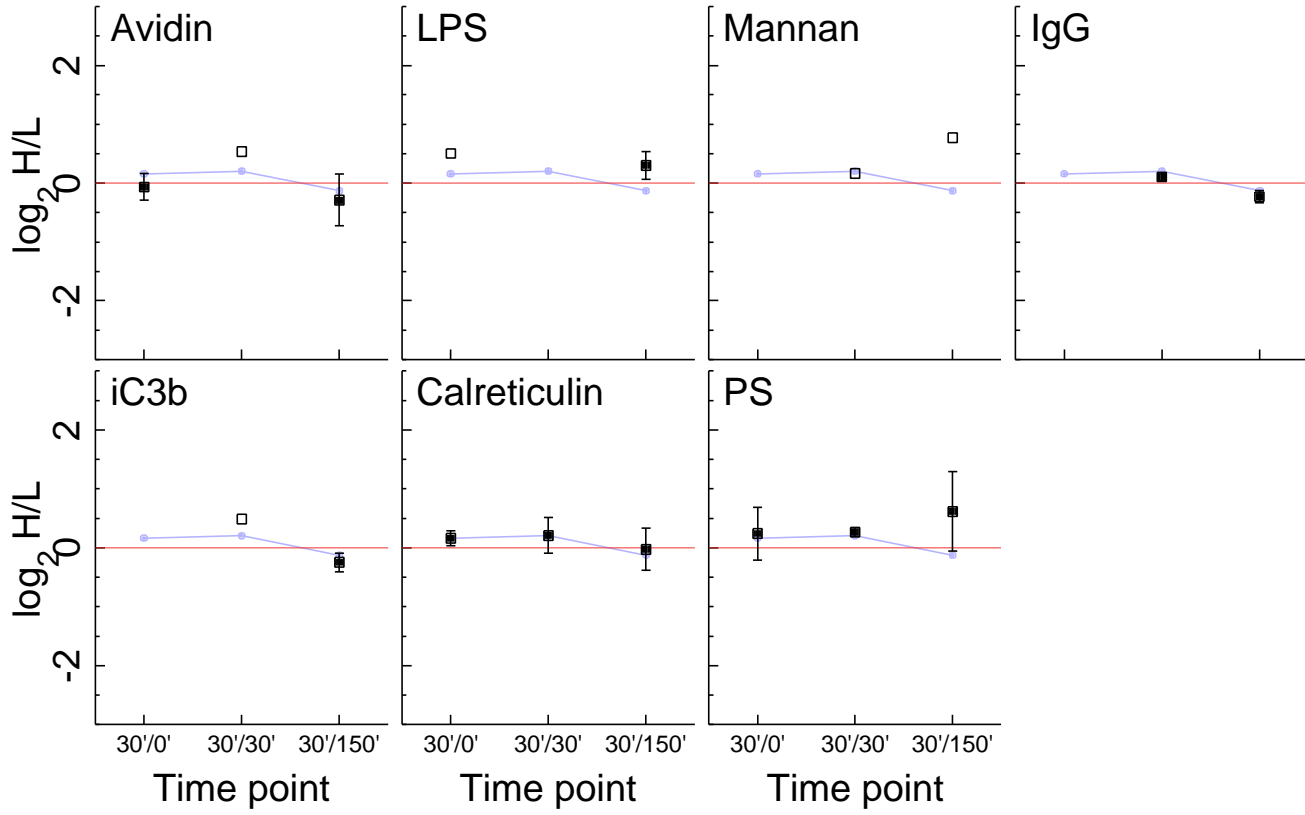

### ubap2l (Q80X50)

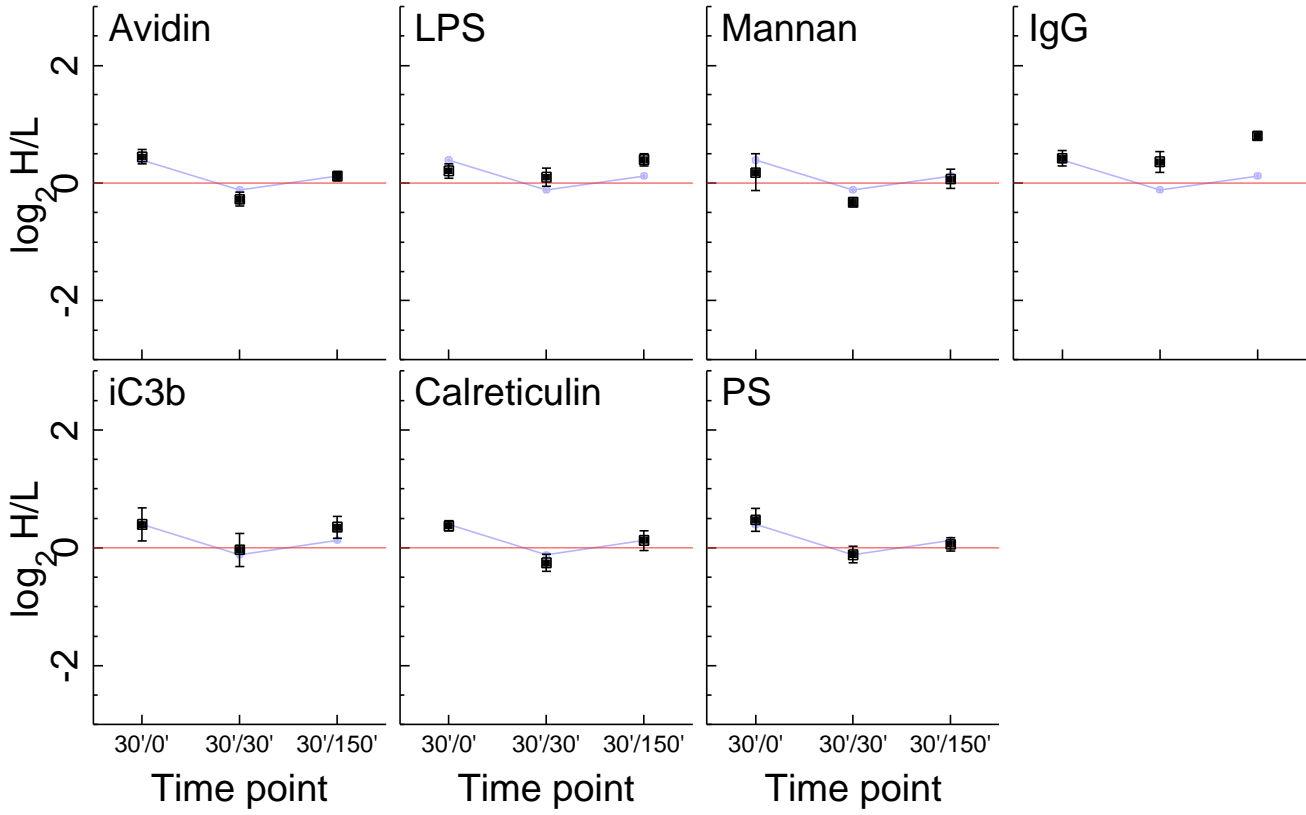

ubap2 (Q91VX2)

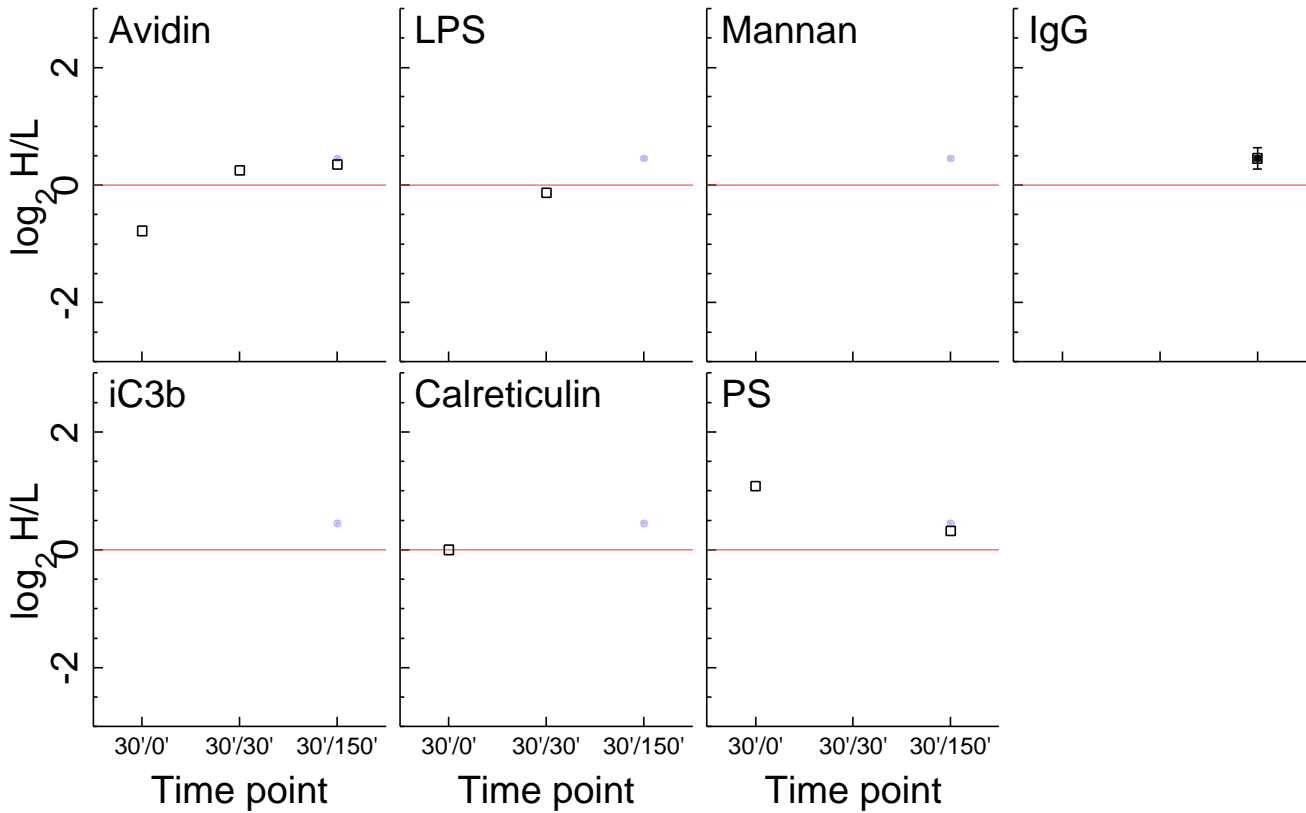

### ube2d3 (P61079)

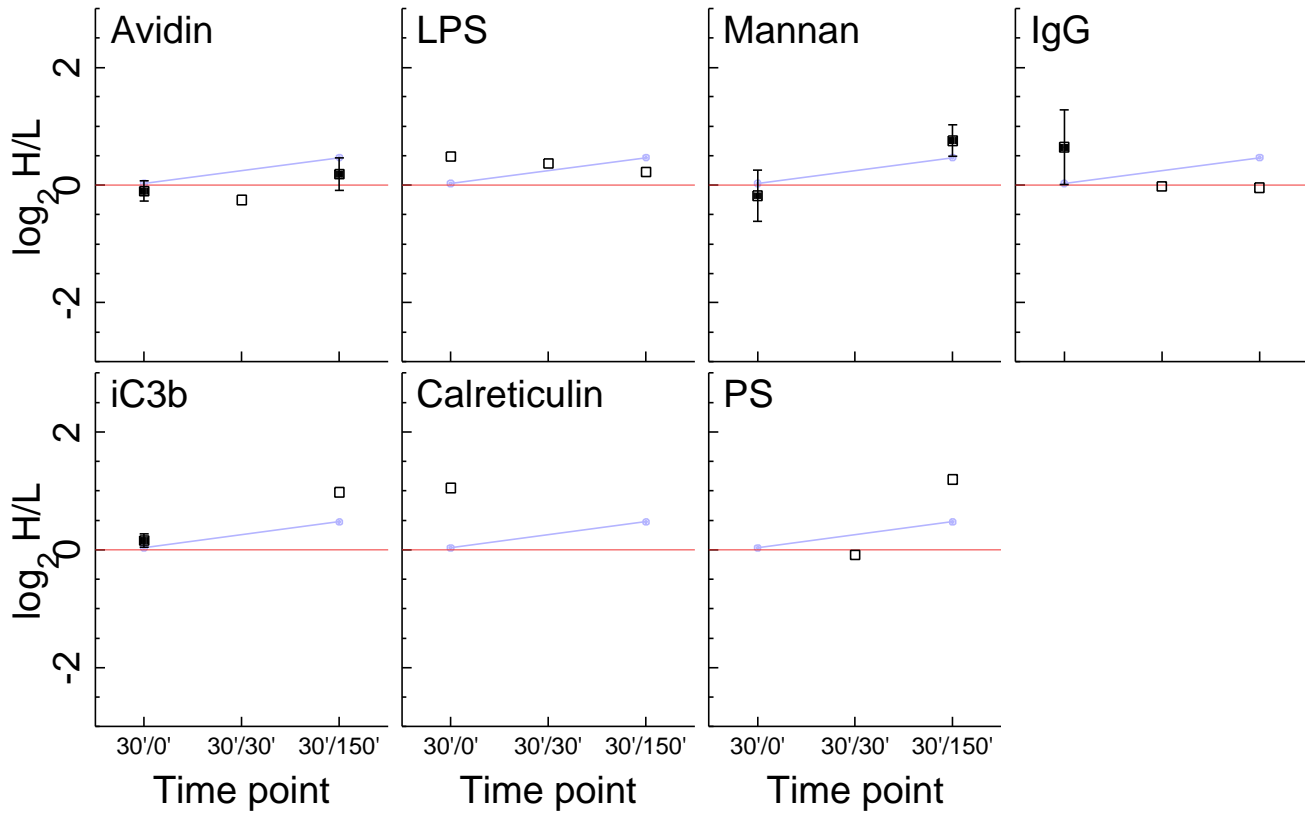

### ube2l3 (P68037)

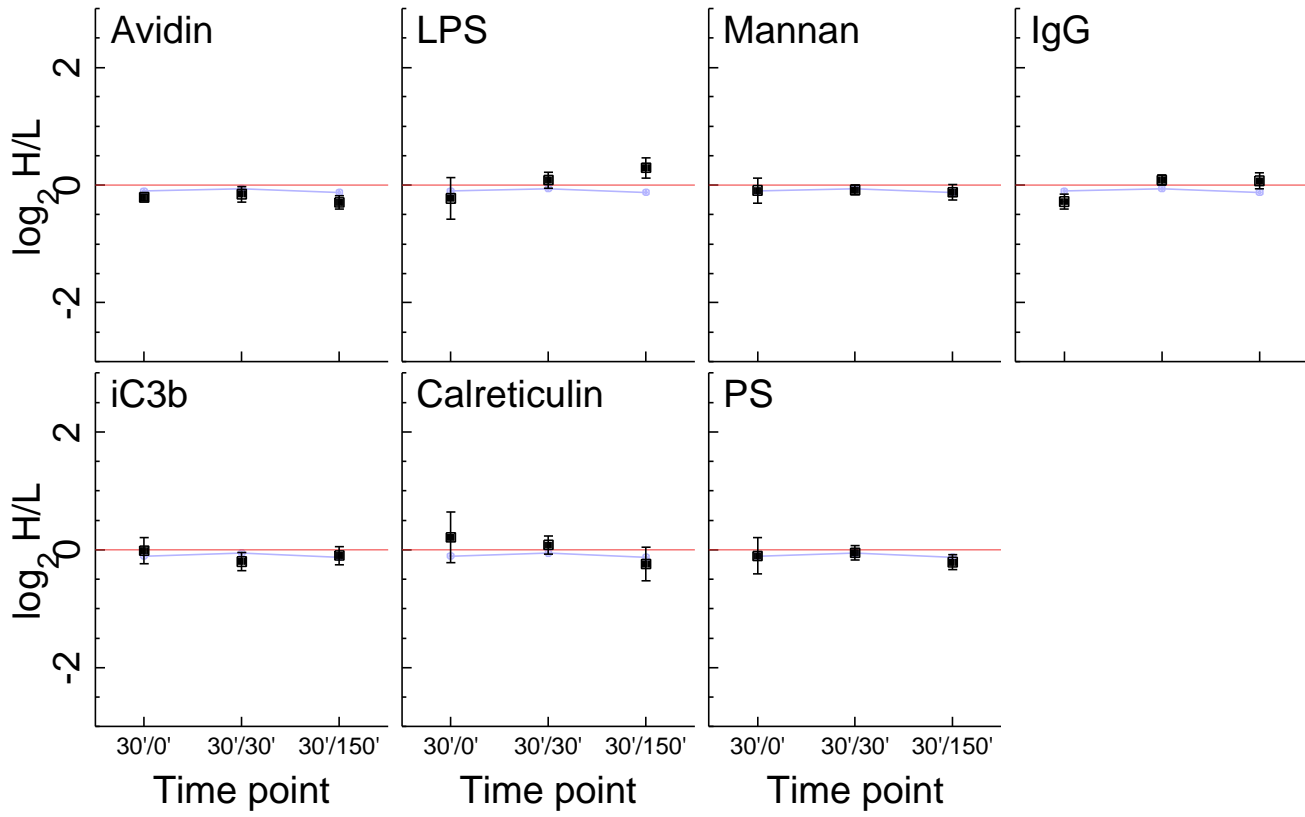

ube2n (P61089)

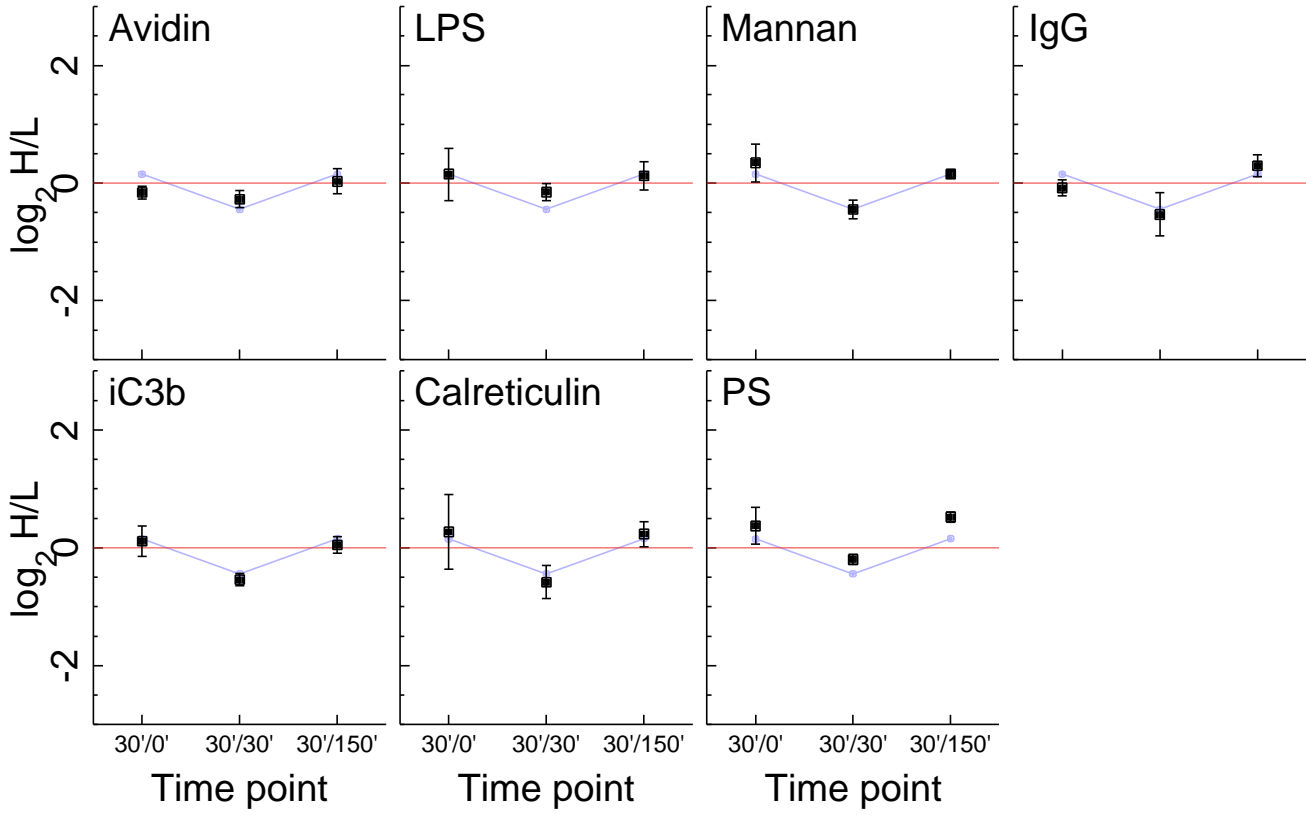



ubl3 (Q9Z2M6)

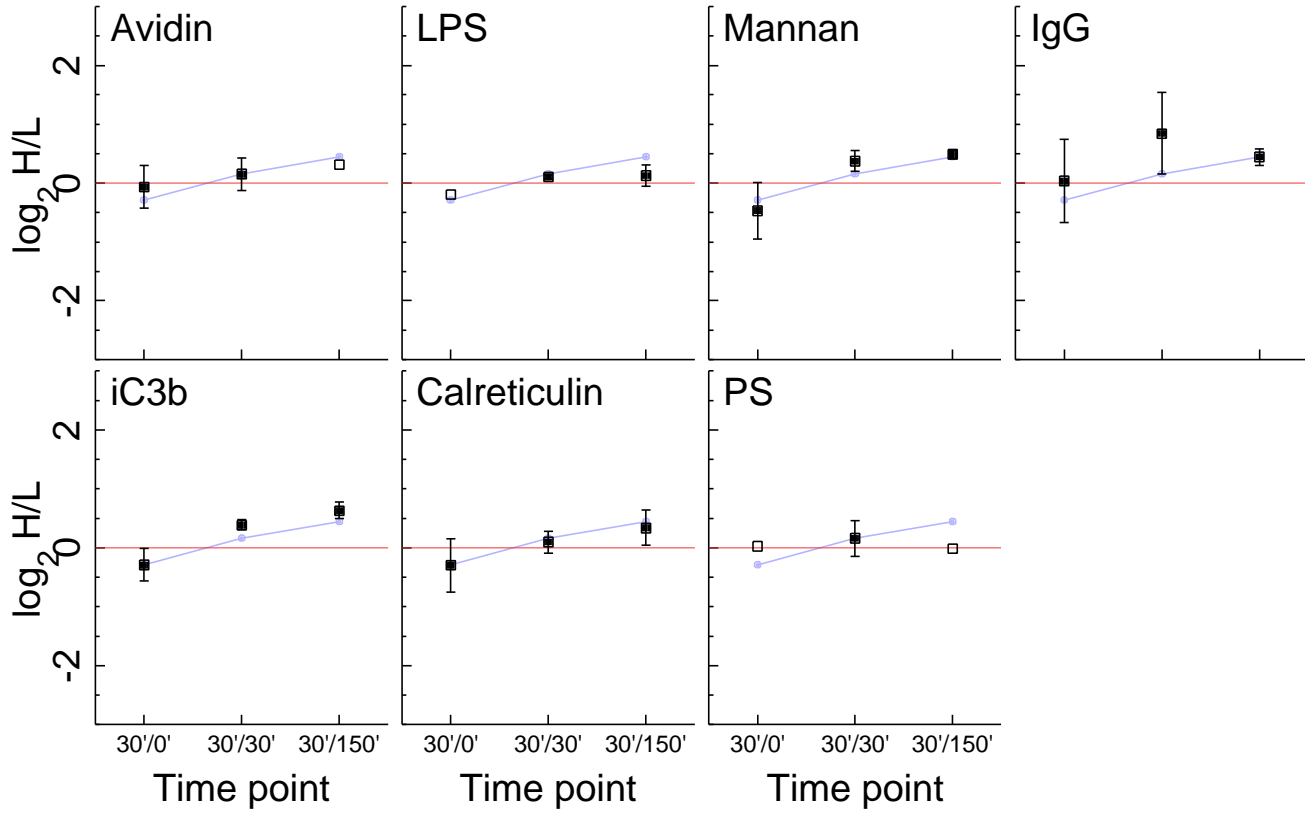

### ubl5 (E0CZB3)

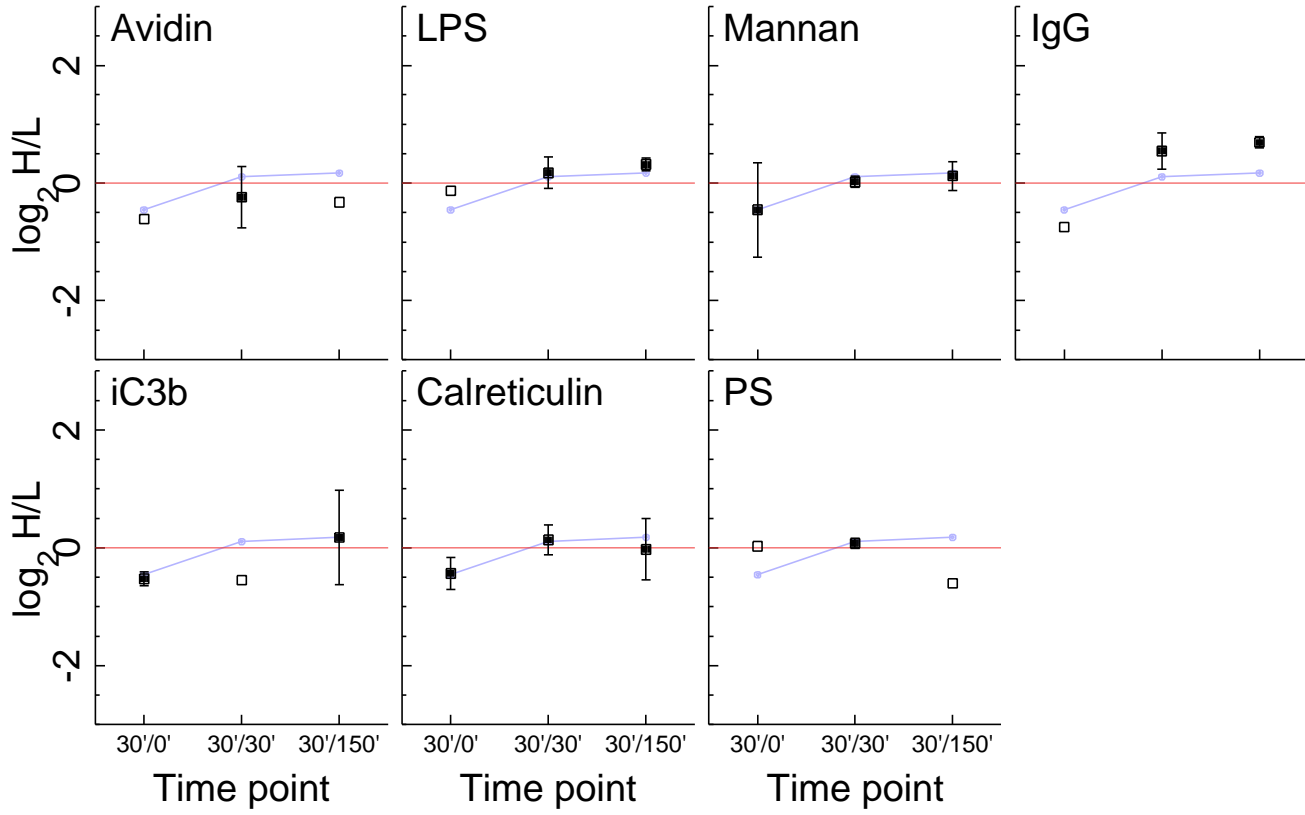

ubtf (P25976)

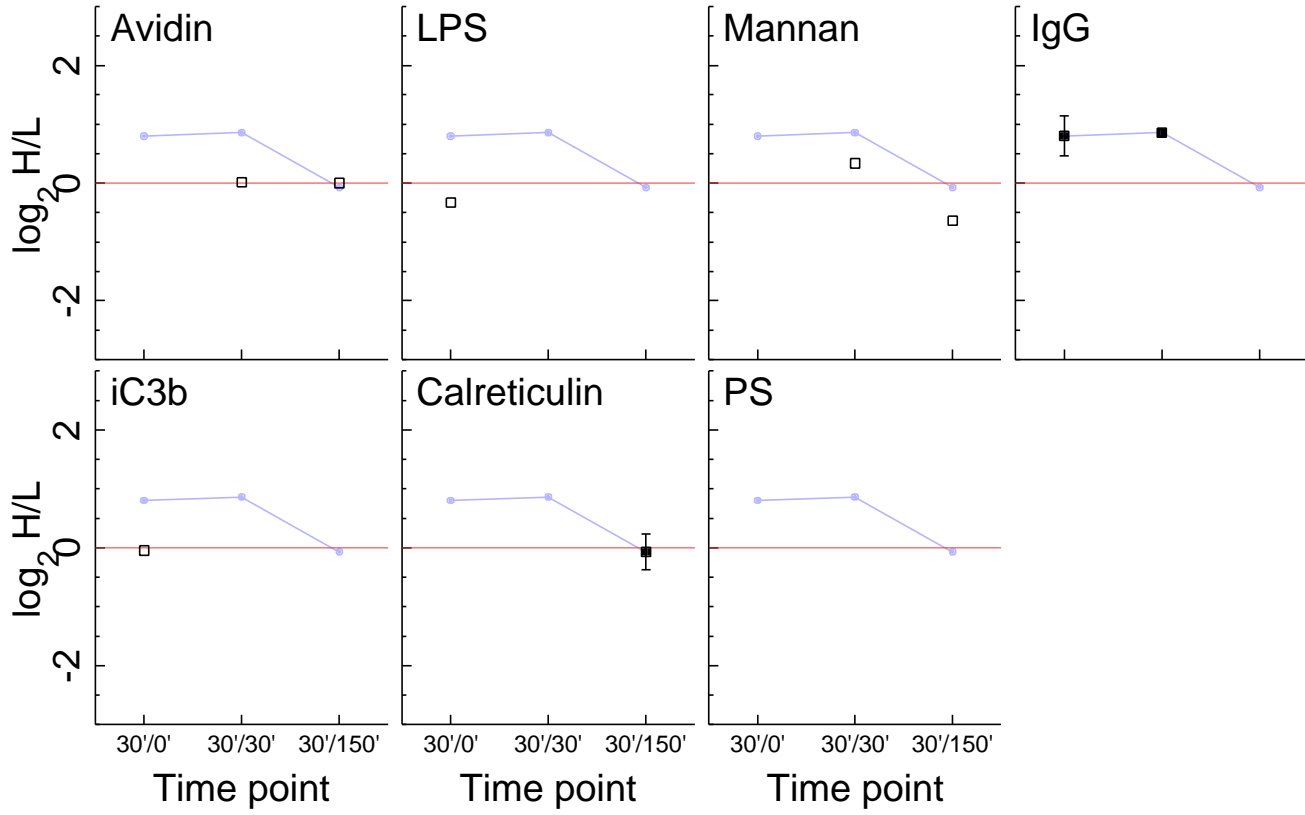

### ubxn4 (Q8VCH8)

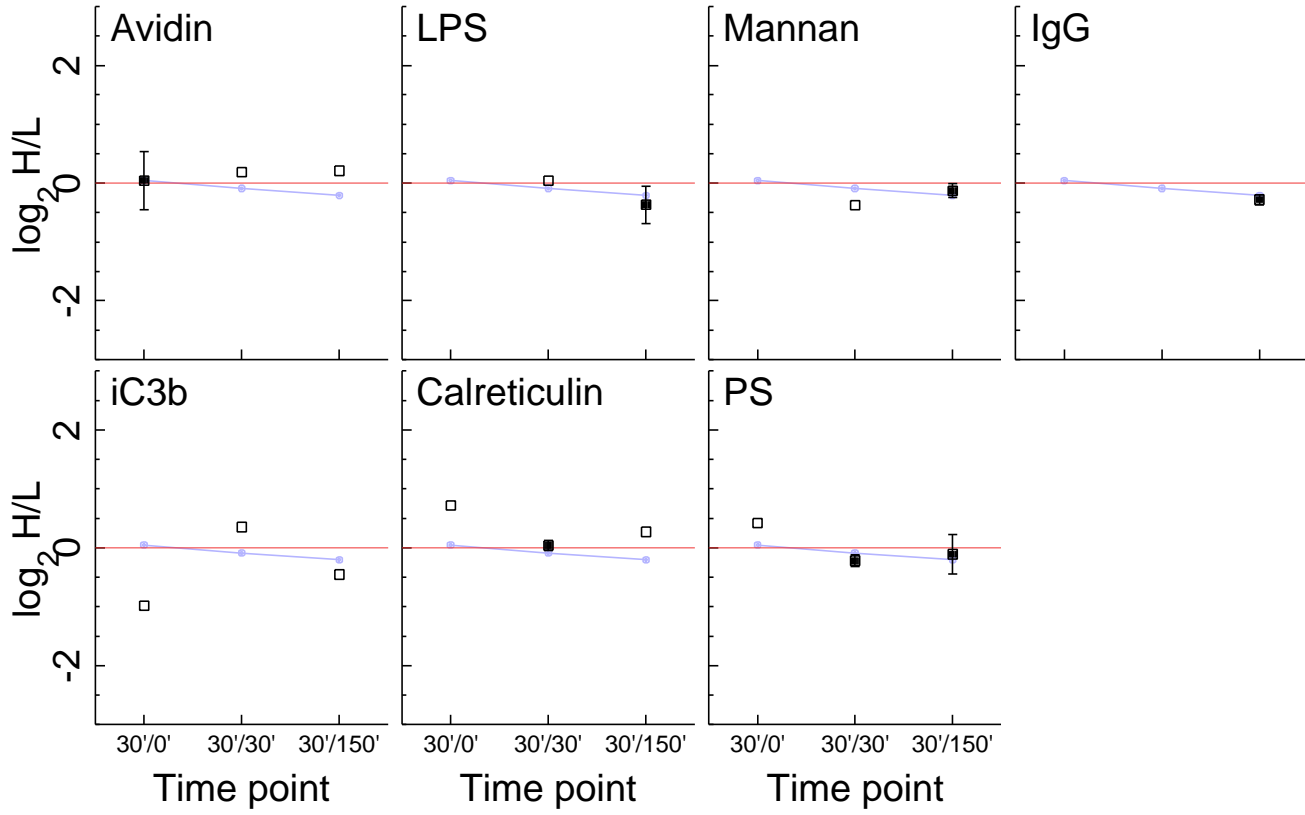

ufd1l (P70362)

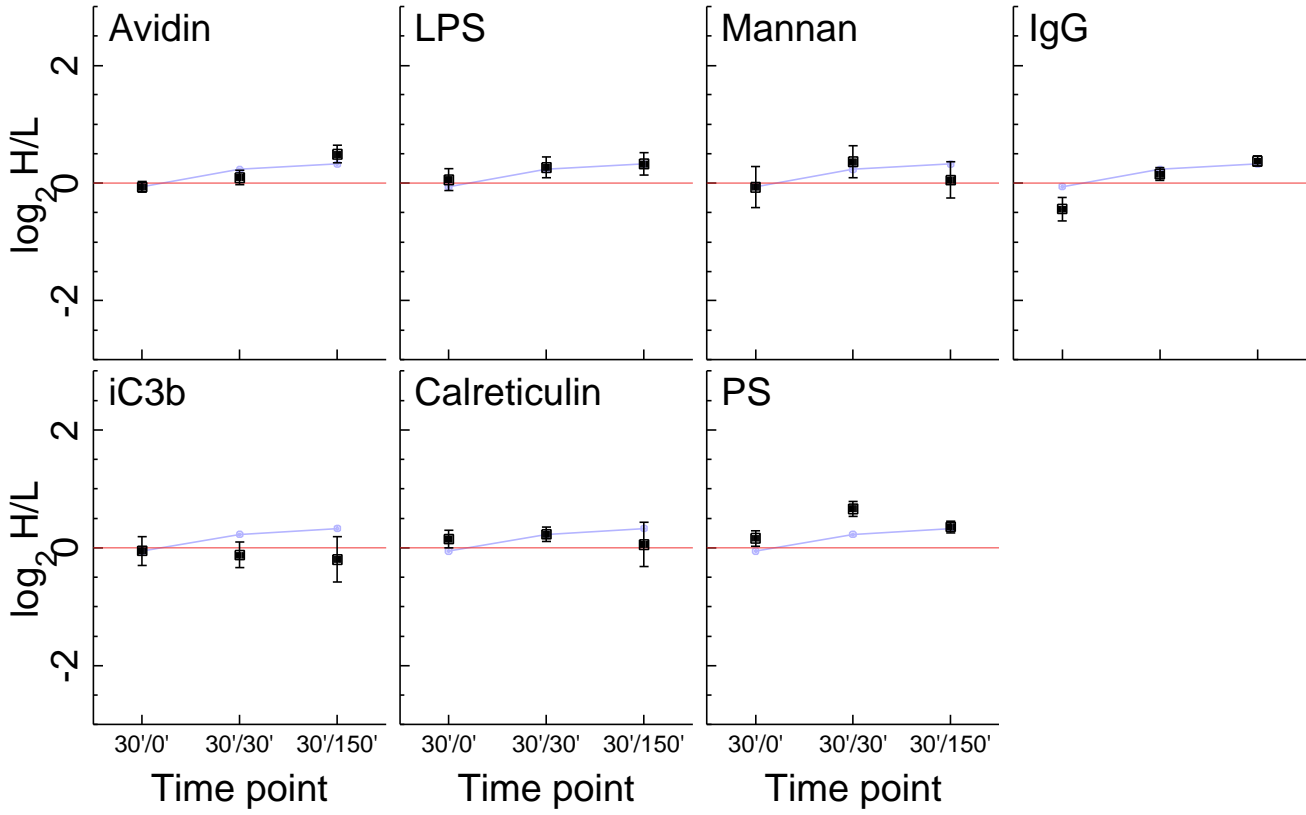

ufm1 (F6XUP5)

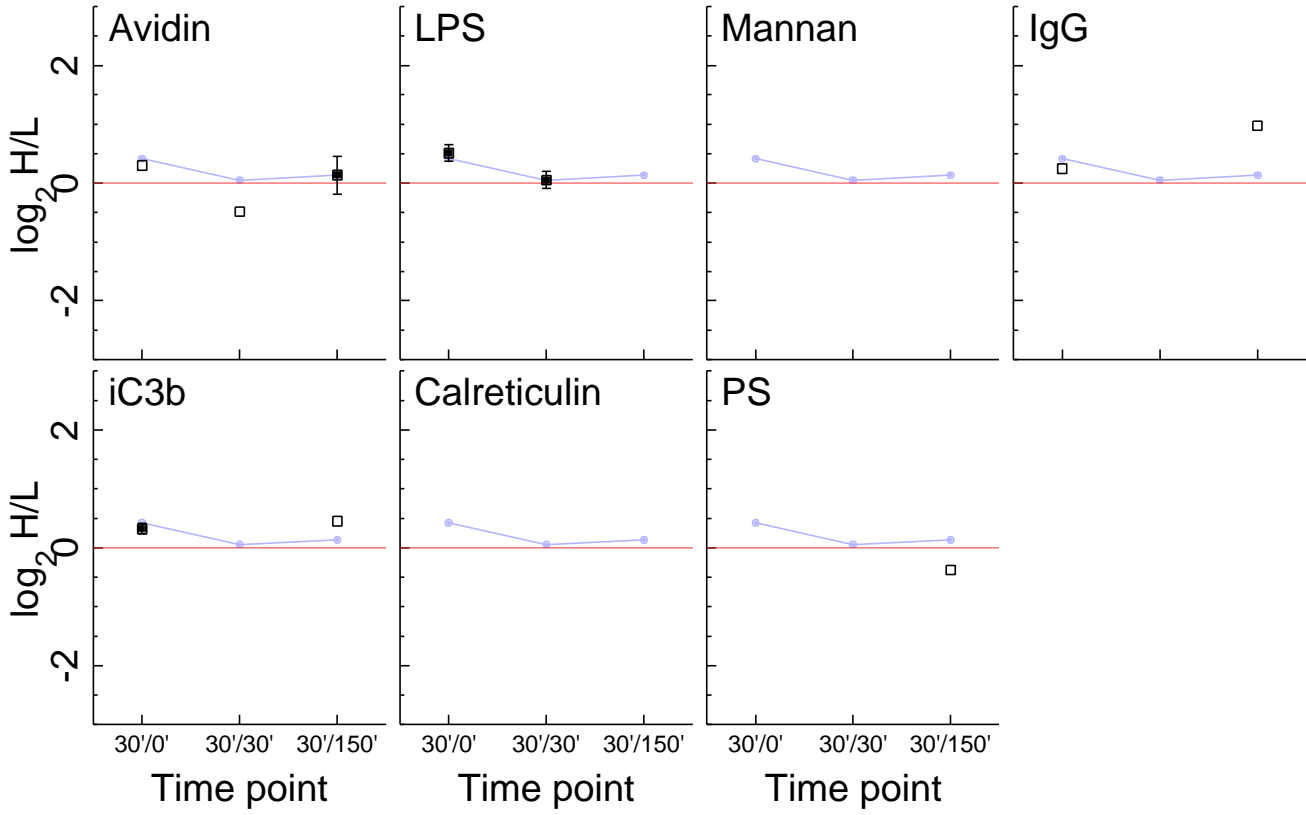

uggt1 (Q6P5E4)

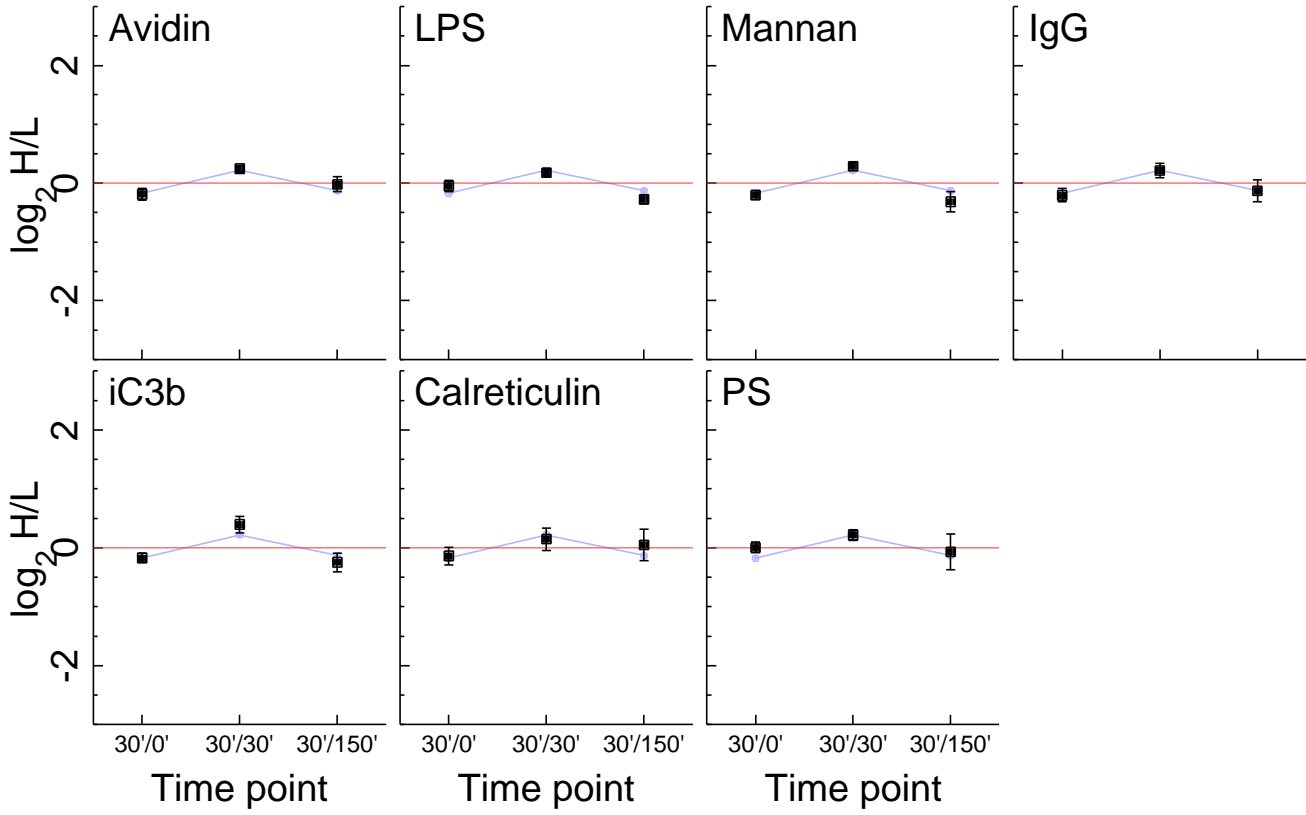

### ugt1a7c (Q6ZQM8)

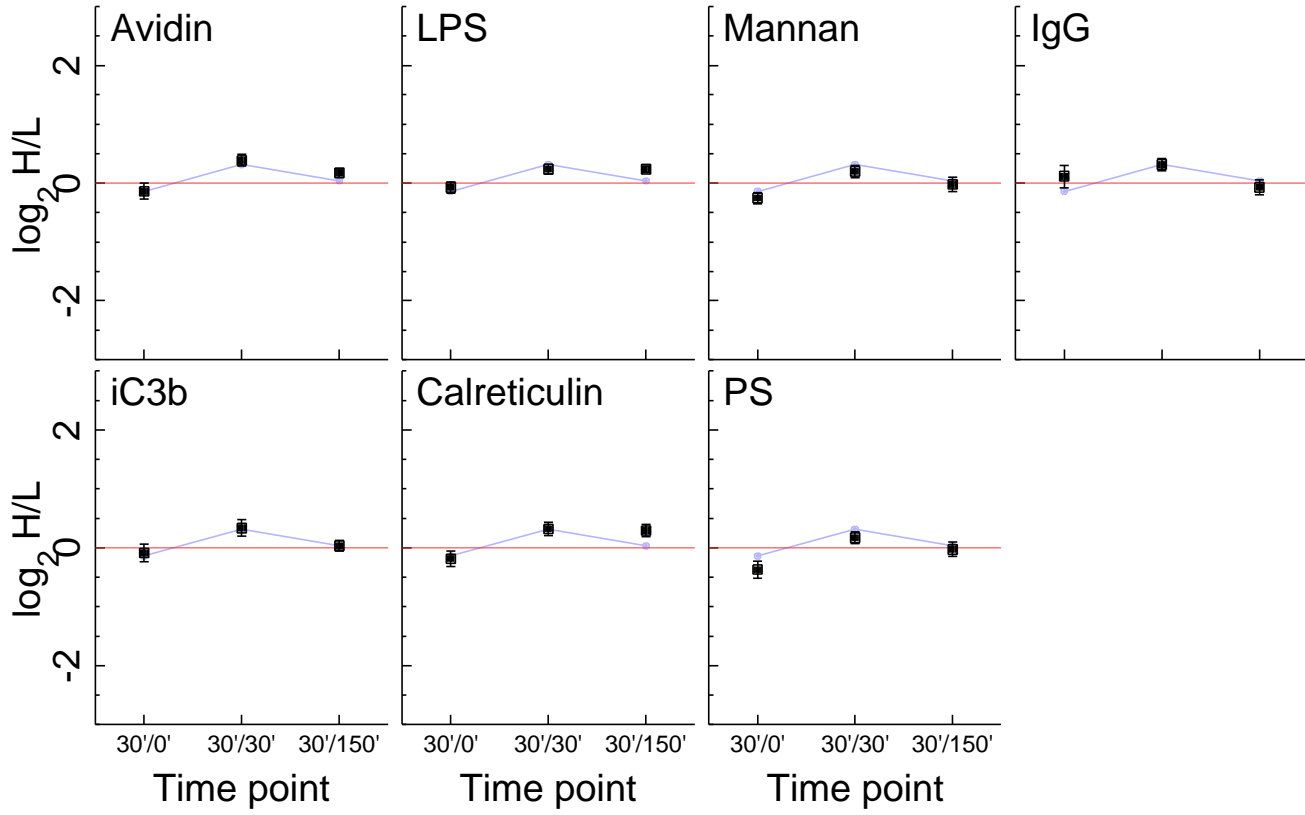



# unc13d (B2RUP2)

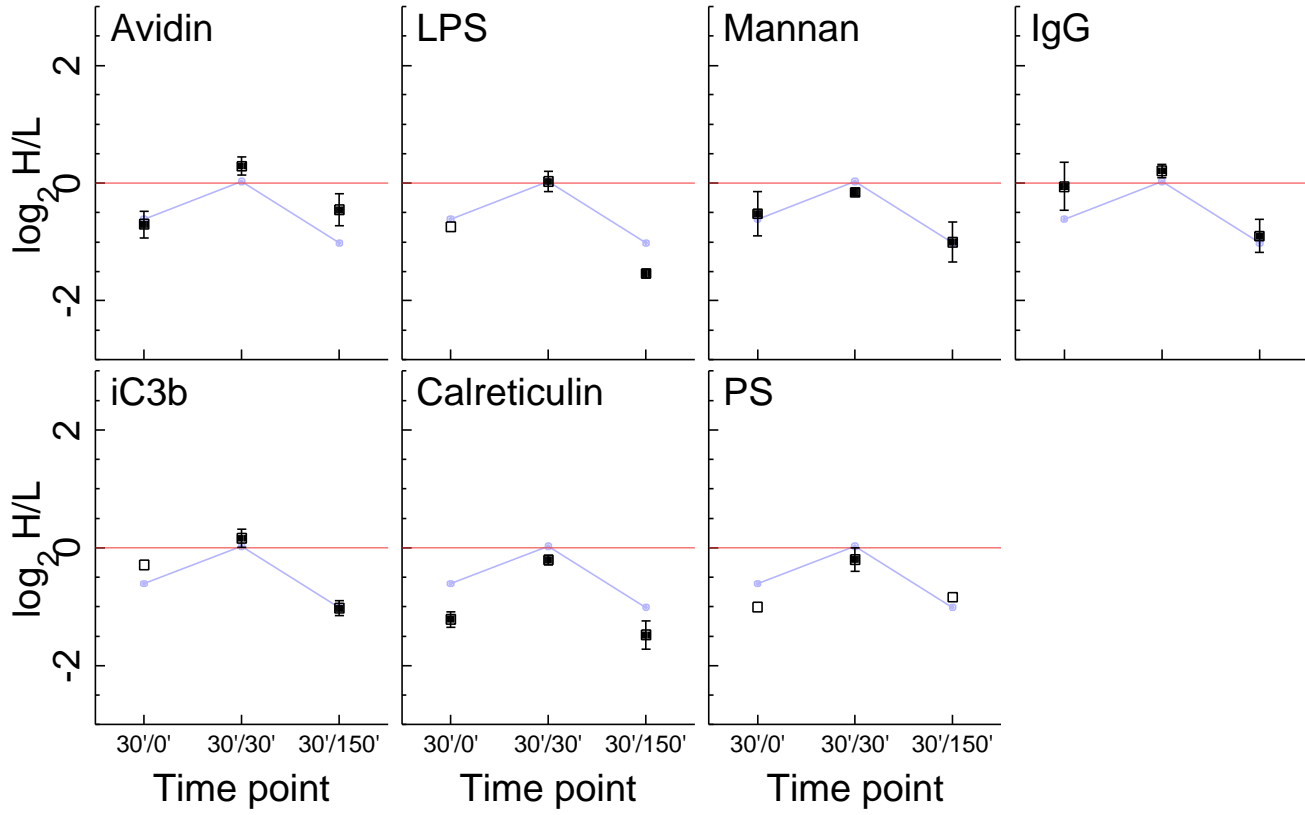

unc93b1 (E9PYK0)

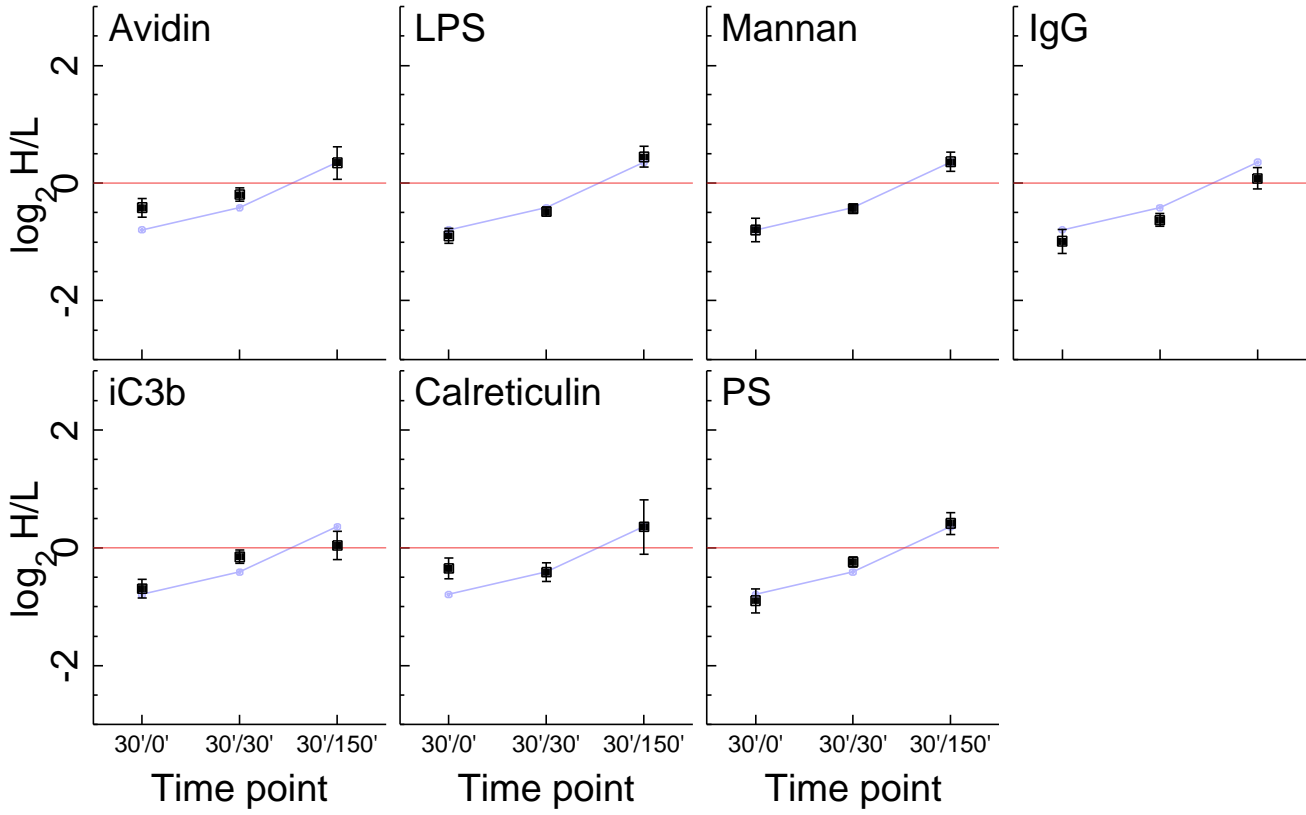

# upf1 (Q9EPU0)

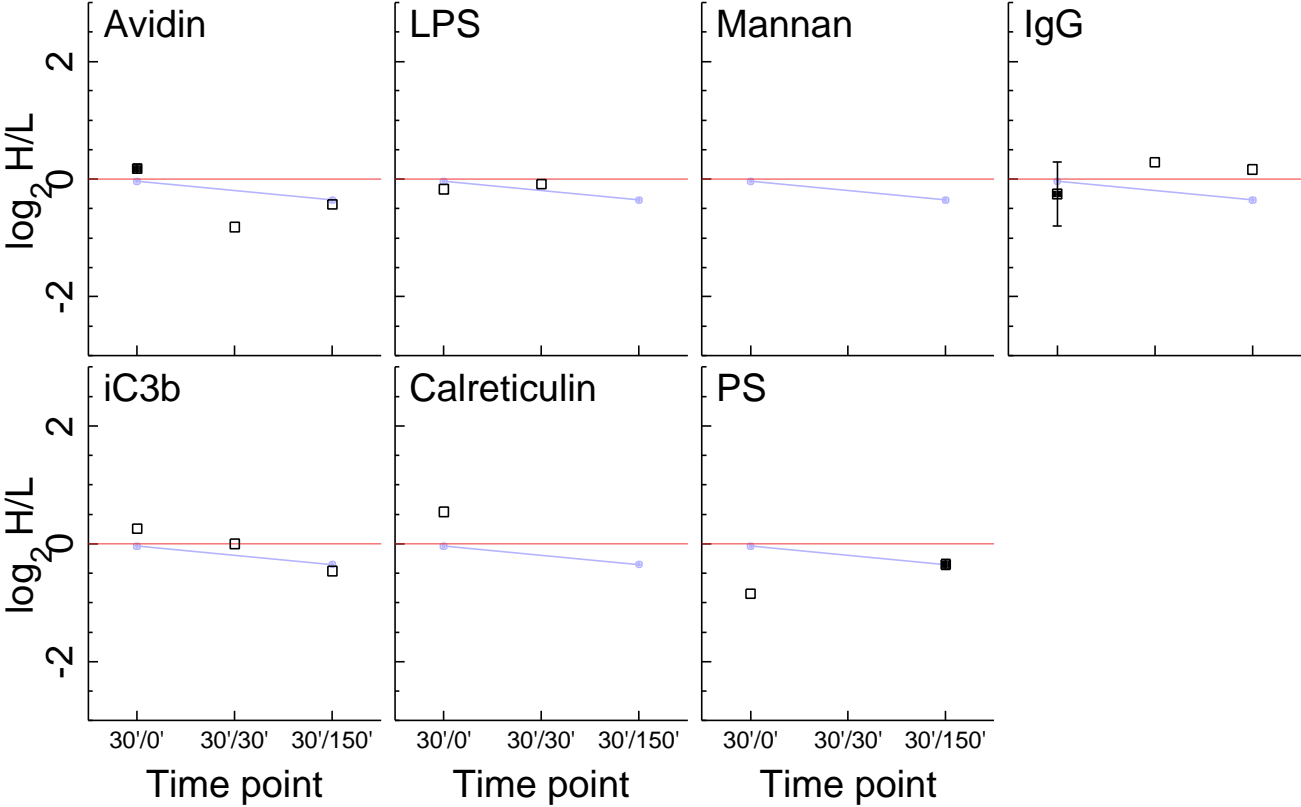

uqcrb (Q9CQB4)

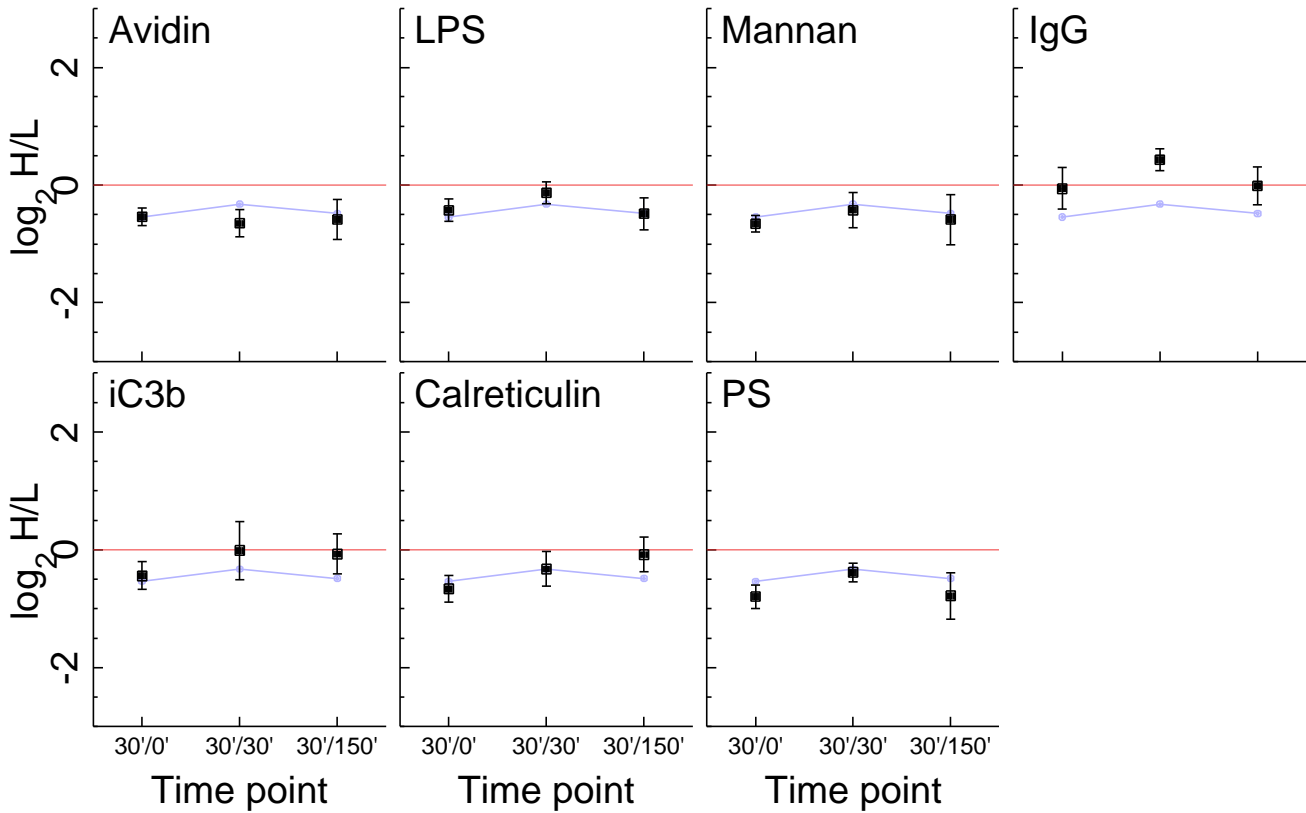

### uqcrc1 (Q9CZ13)

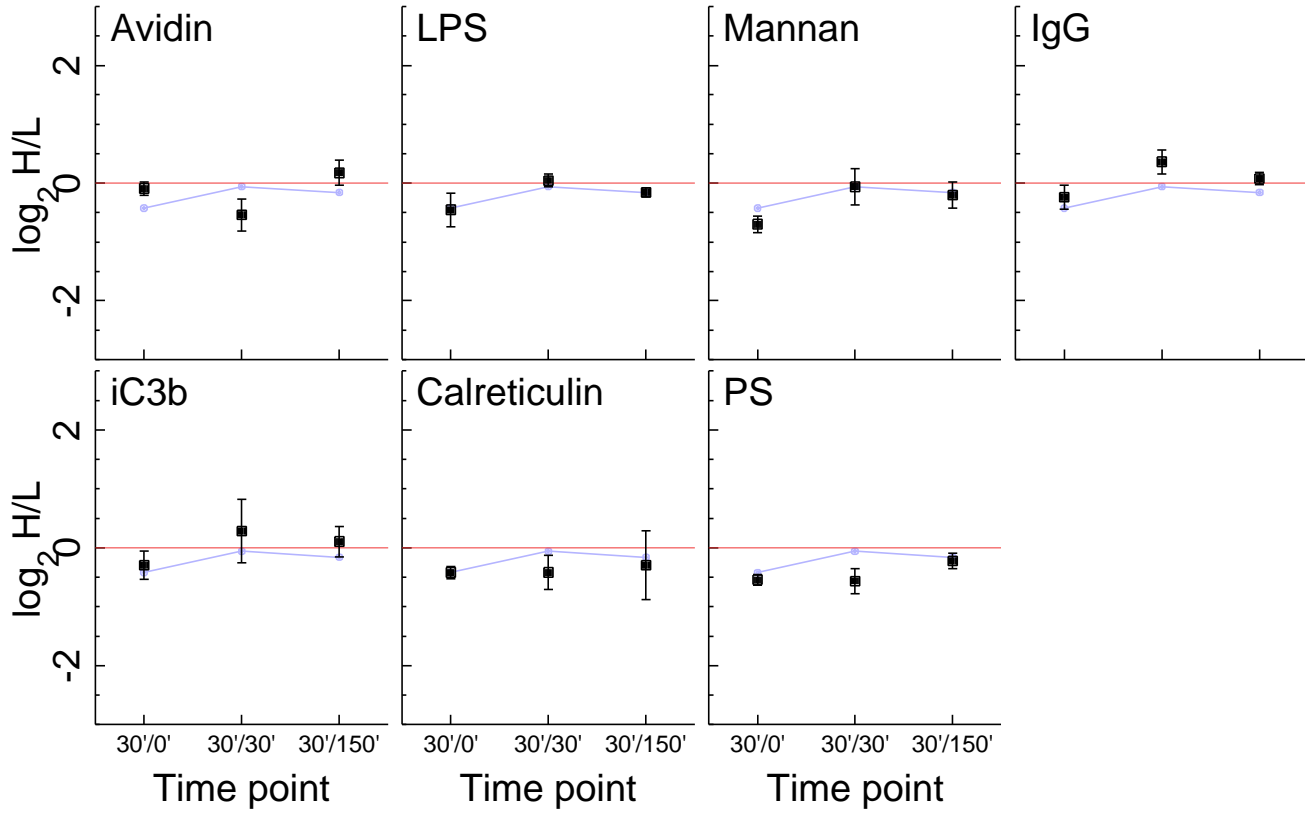

### uqcrc2 (Q9DB77)

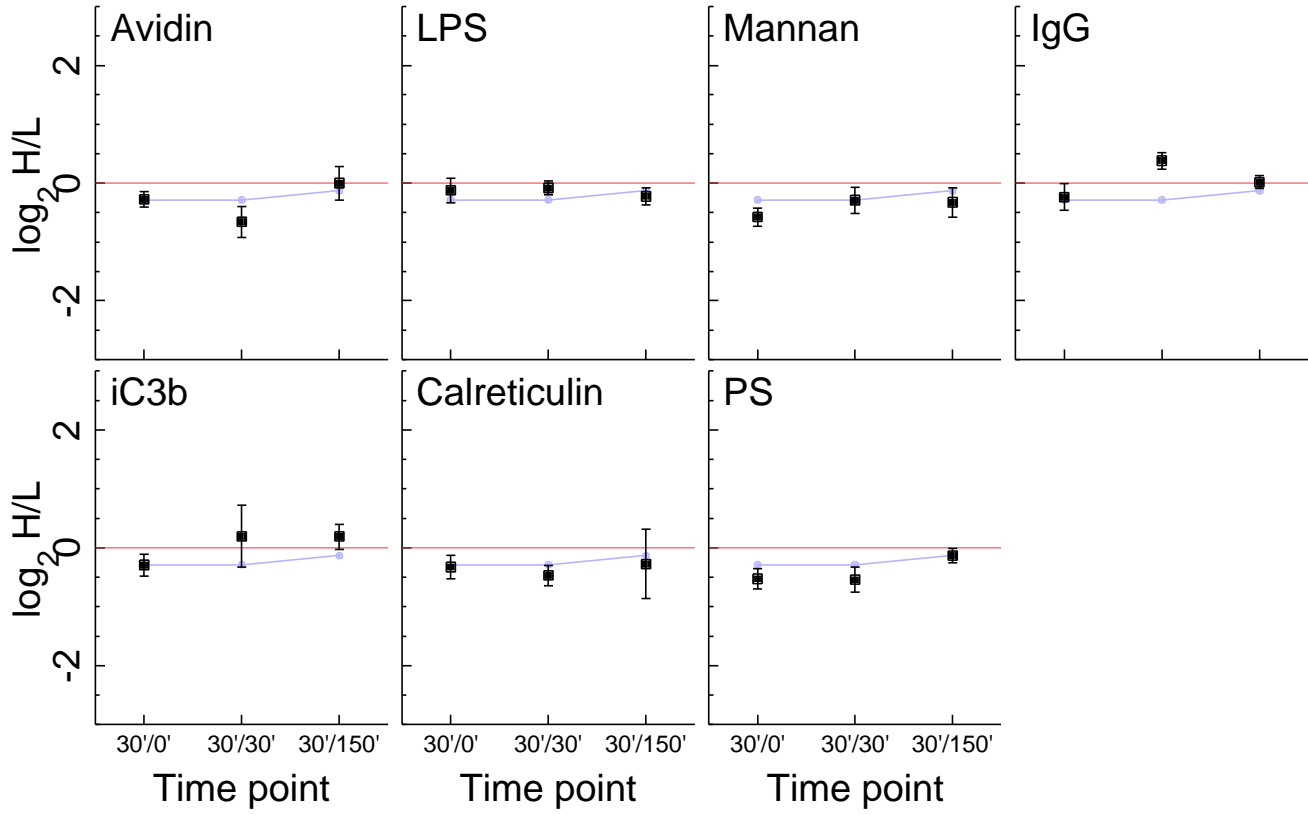

### uqcrfs1 (Q9CR68)

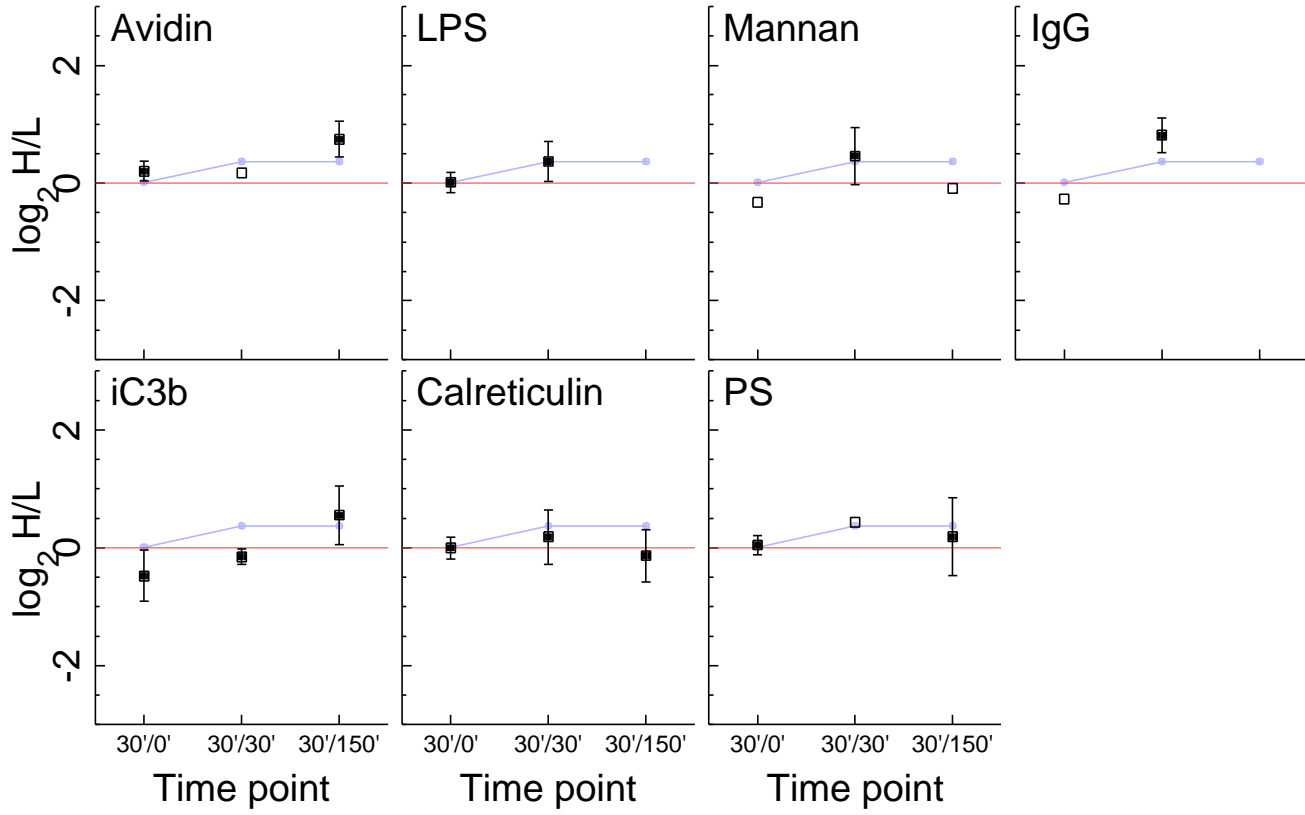

uqcrh (P99028)

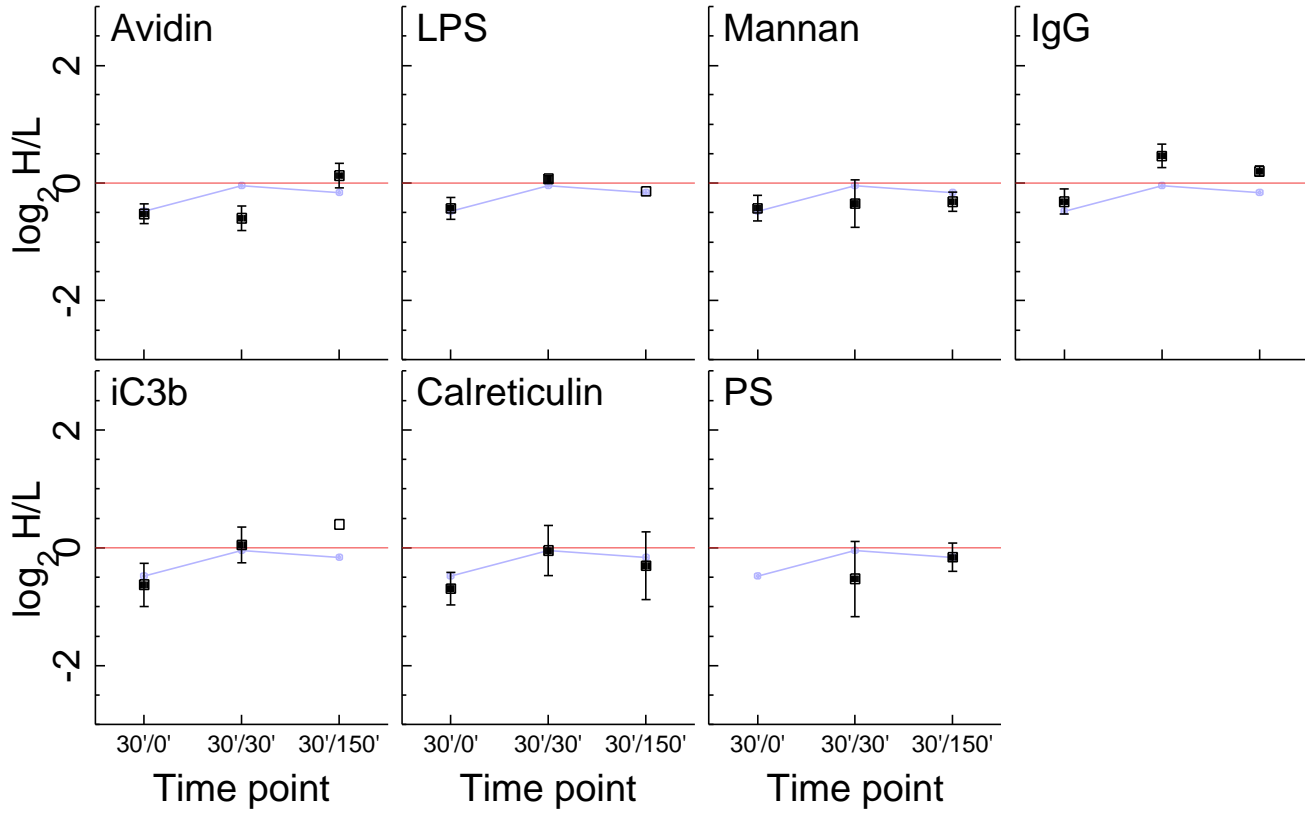



usmg5 (Q78IK2)

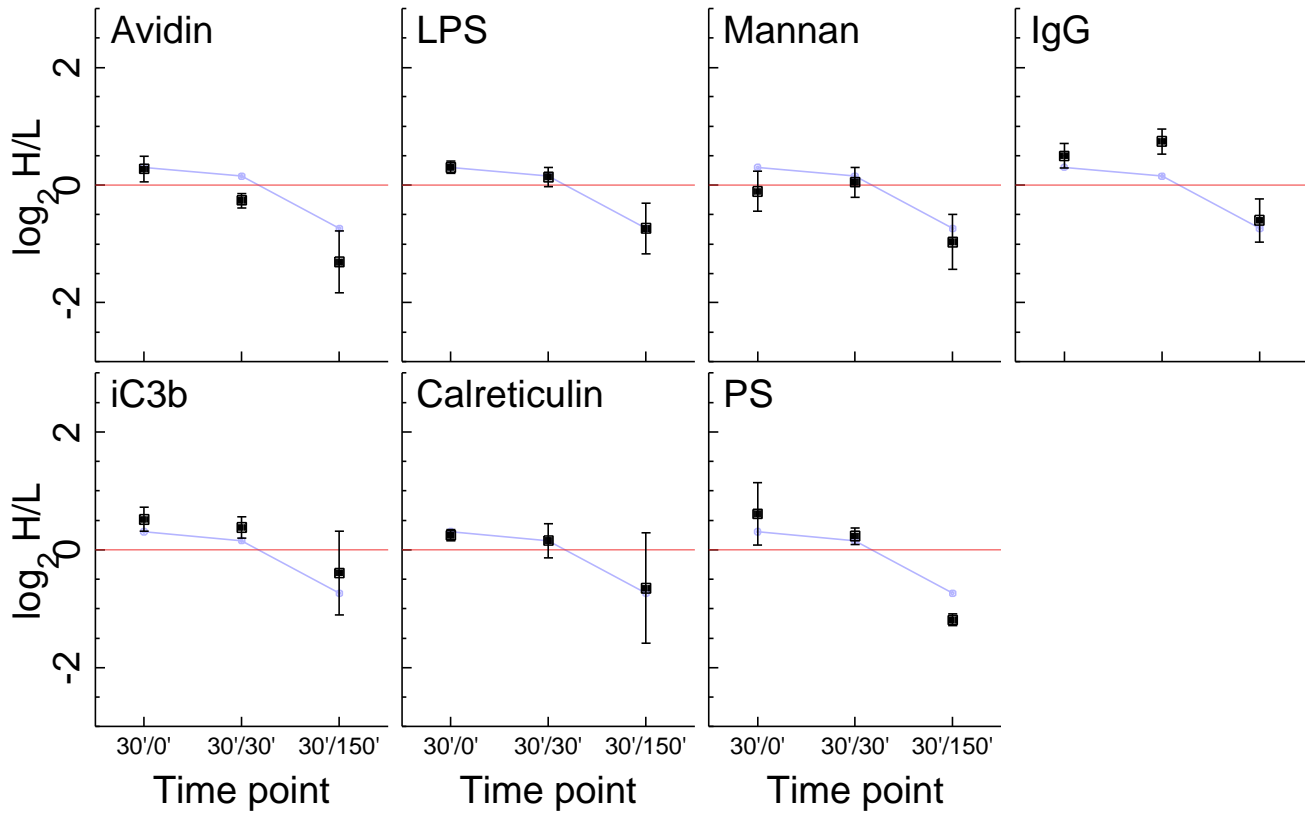

usp12 (Q9D9M2)

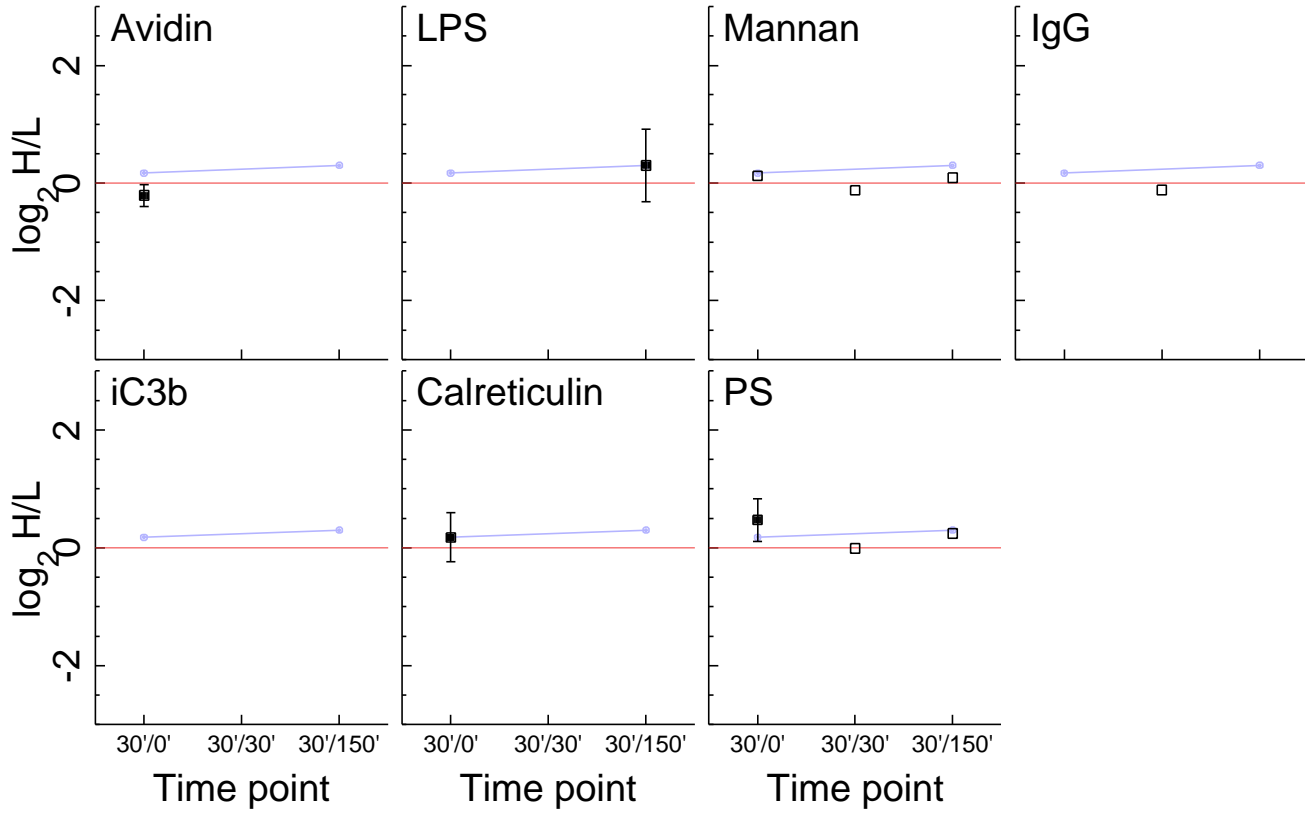

uvrag (Q8C0K8)

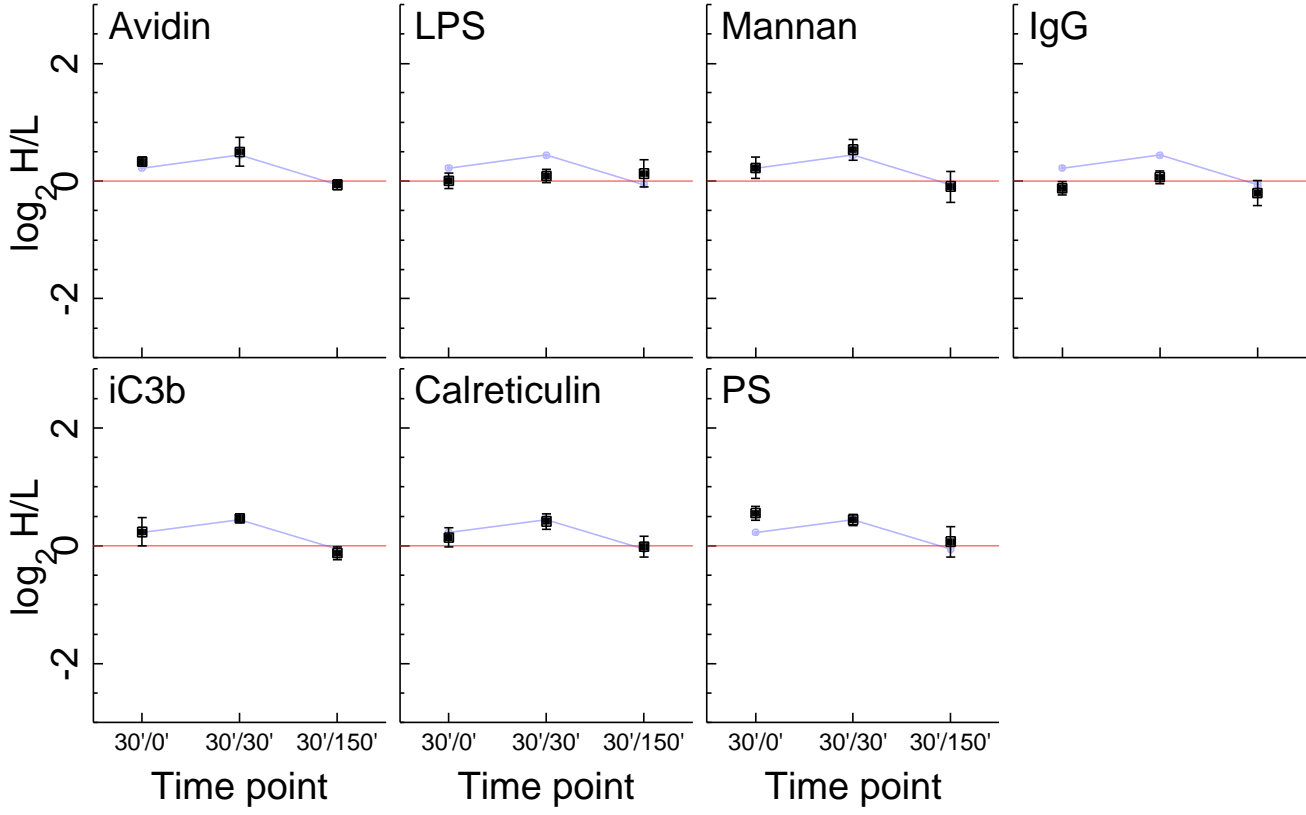

vac14 (Q80WQ2)

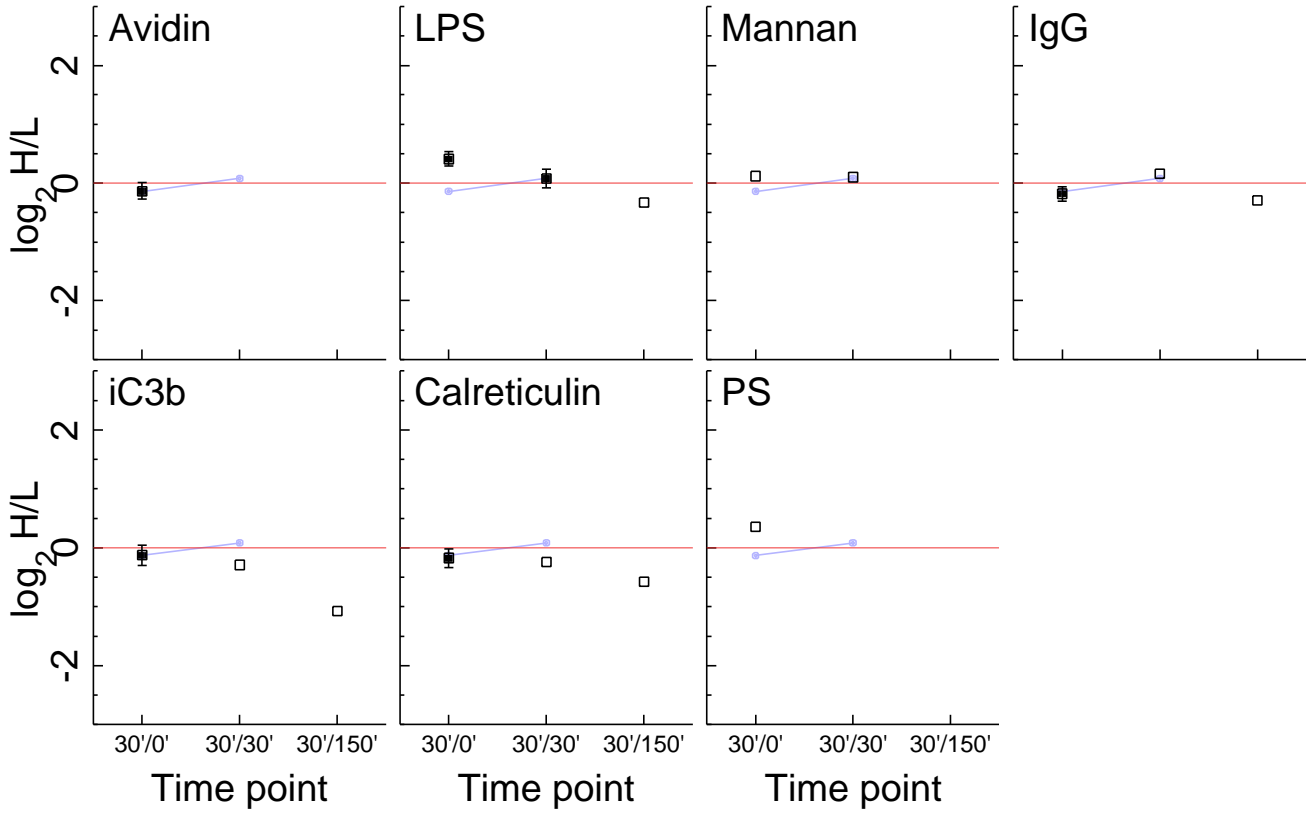

### vamp3 (P63024)

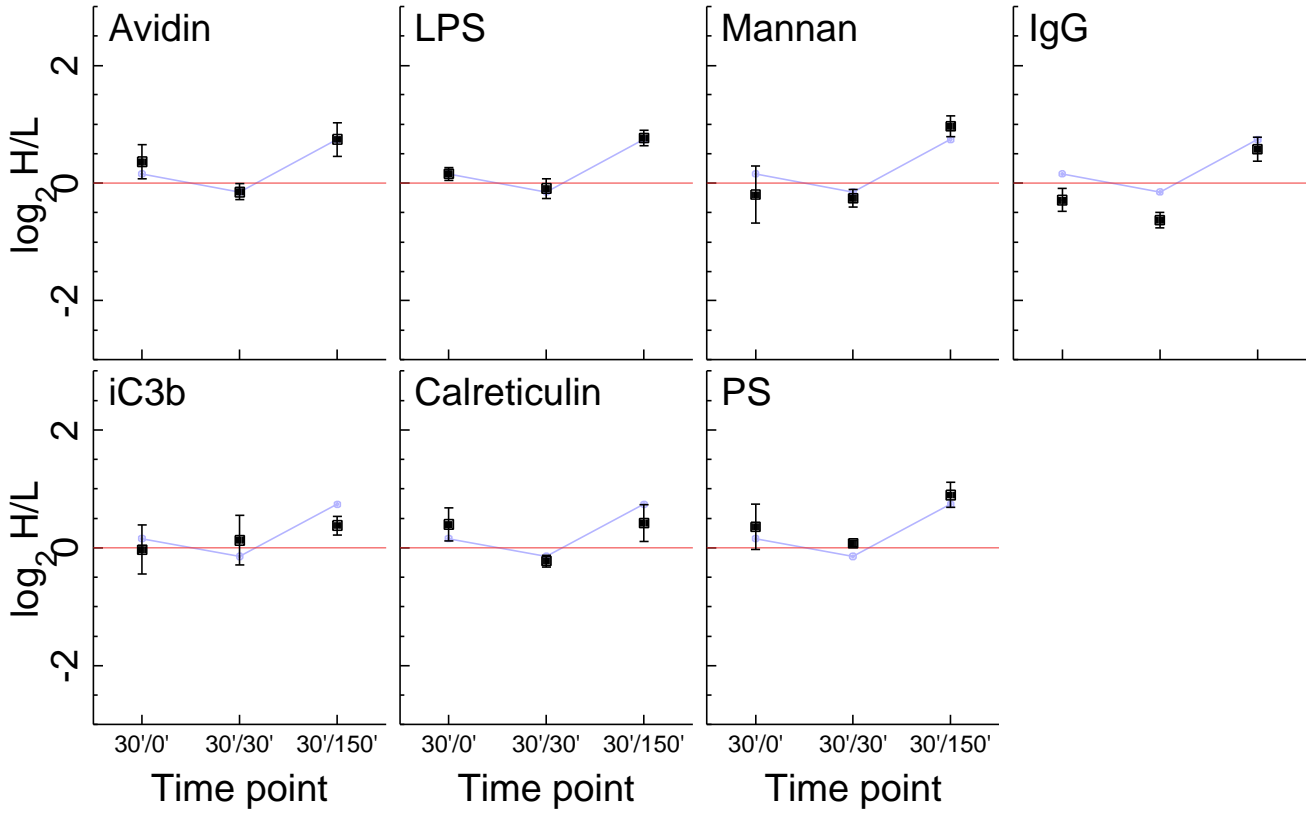

vamp4 (O70480)

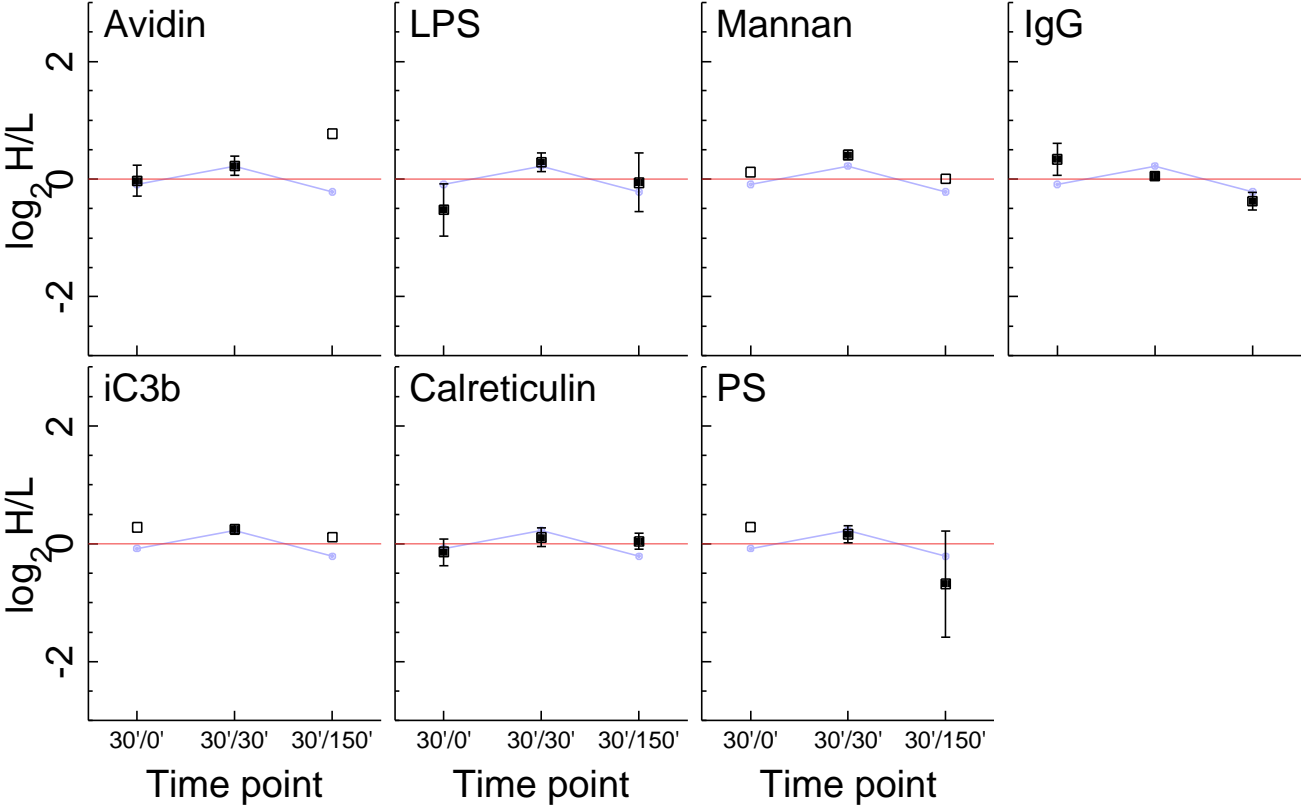

### vamp7 (P70280)

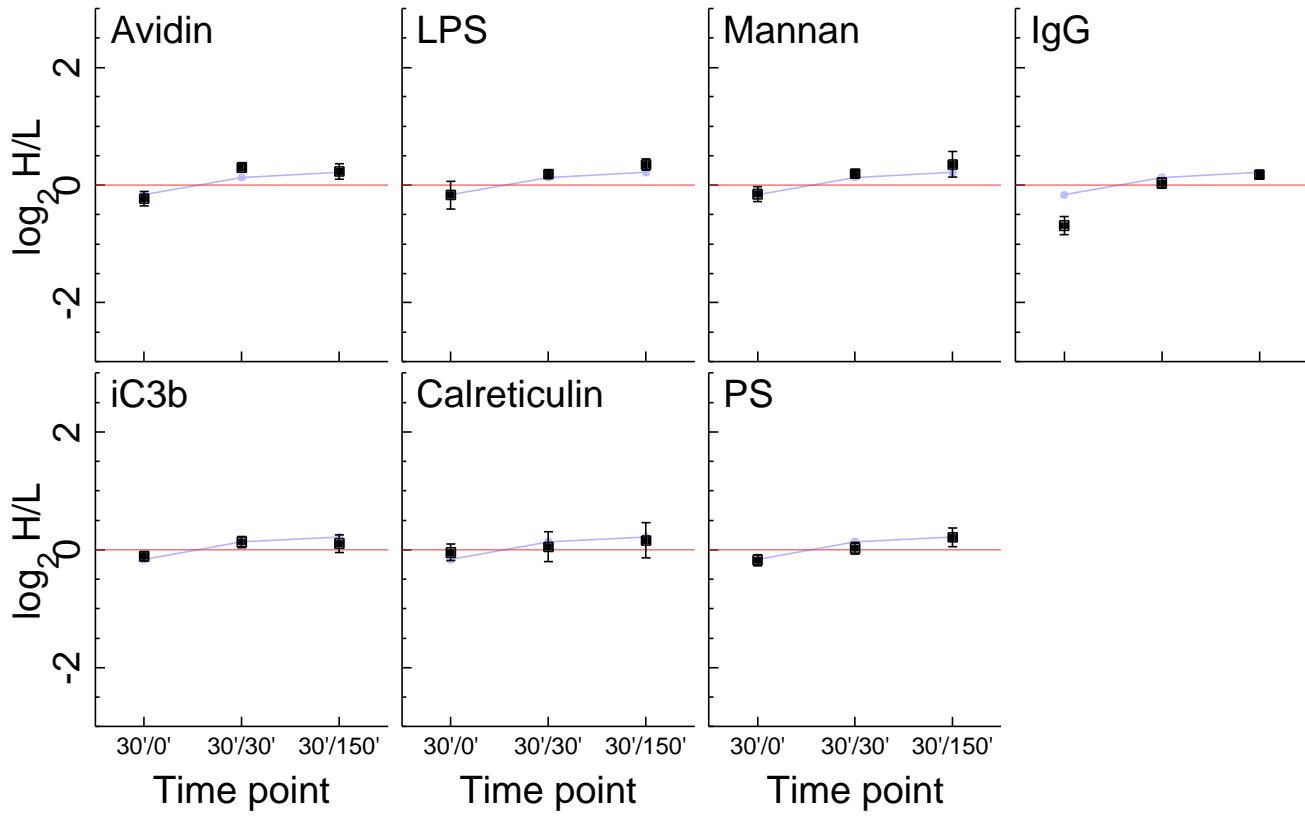

vamp8 (O70404)

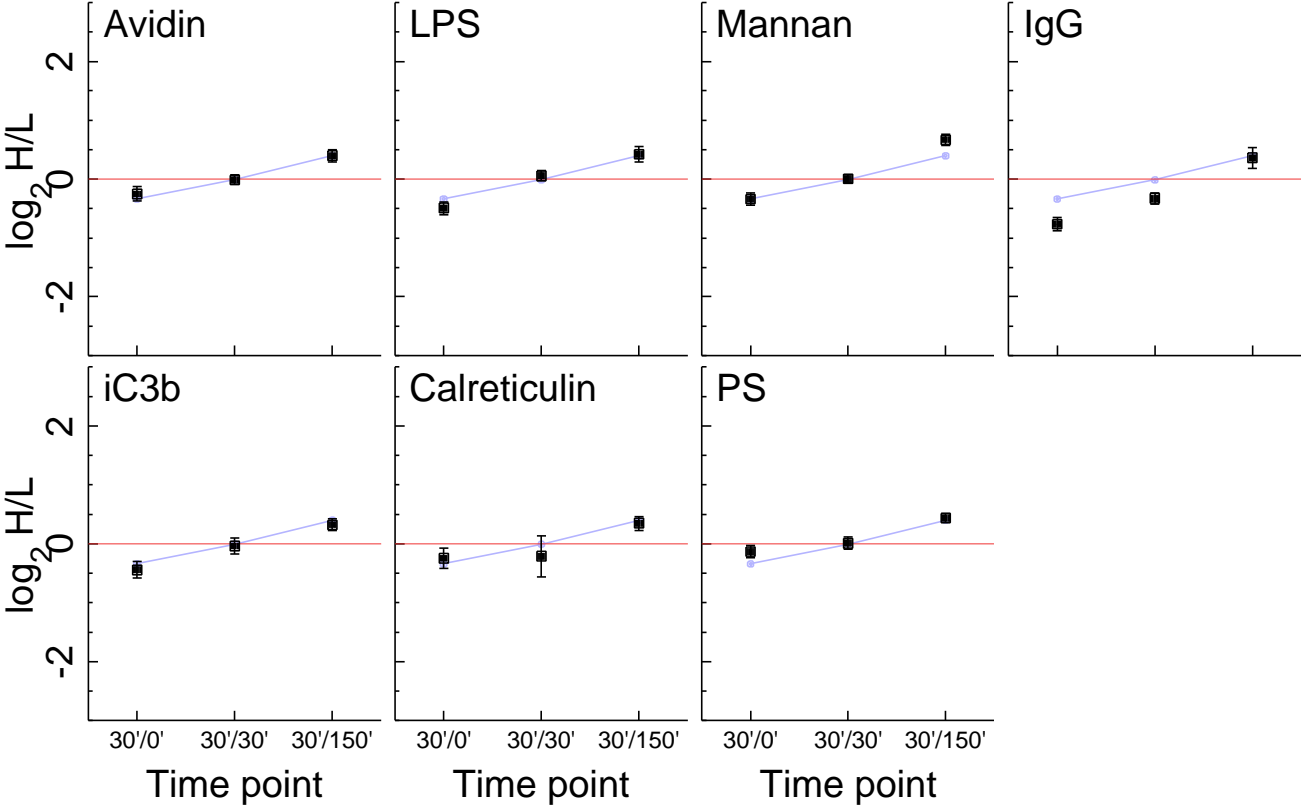



vapa (Q9WV55)

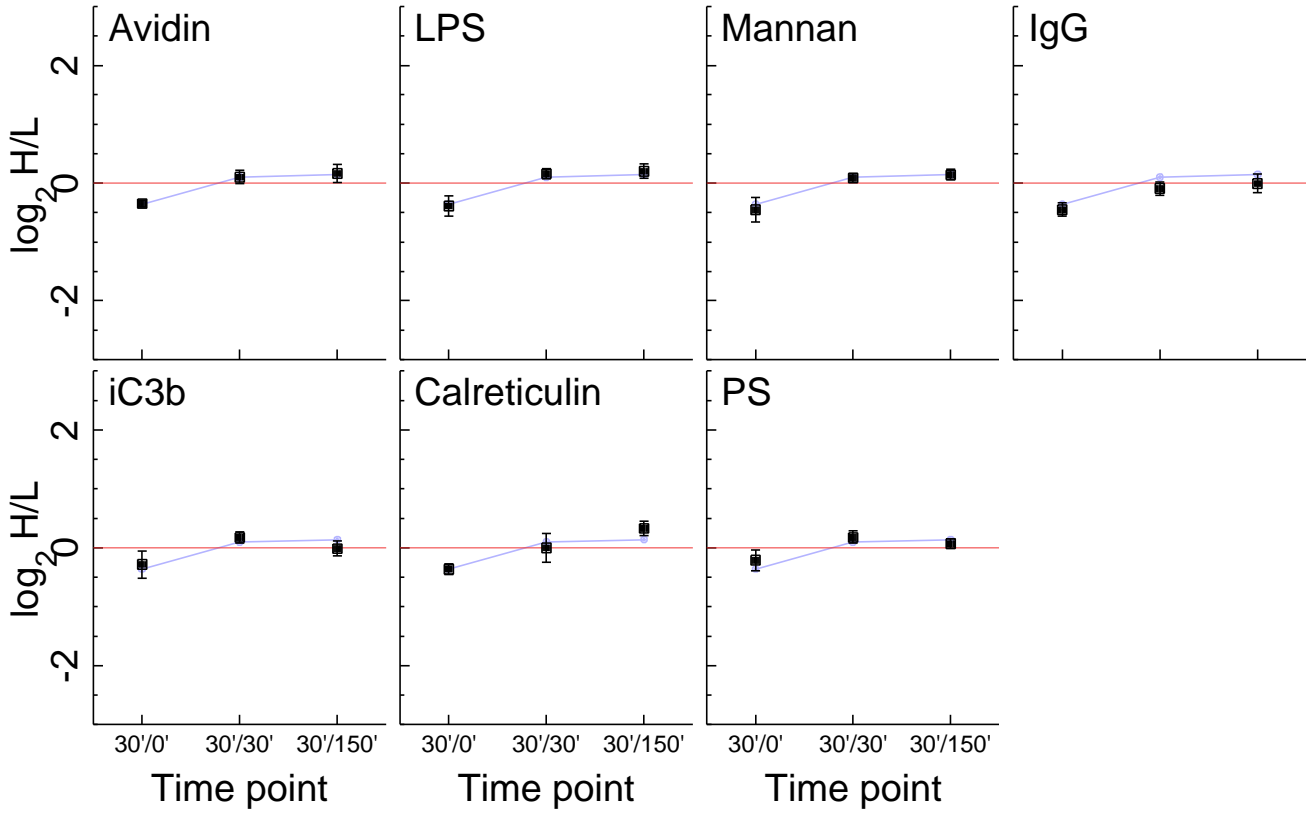

vapb (Q8BH80)

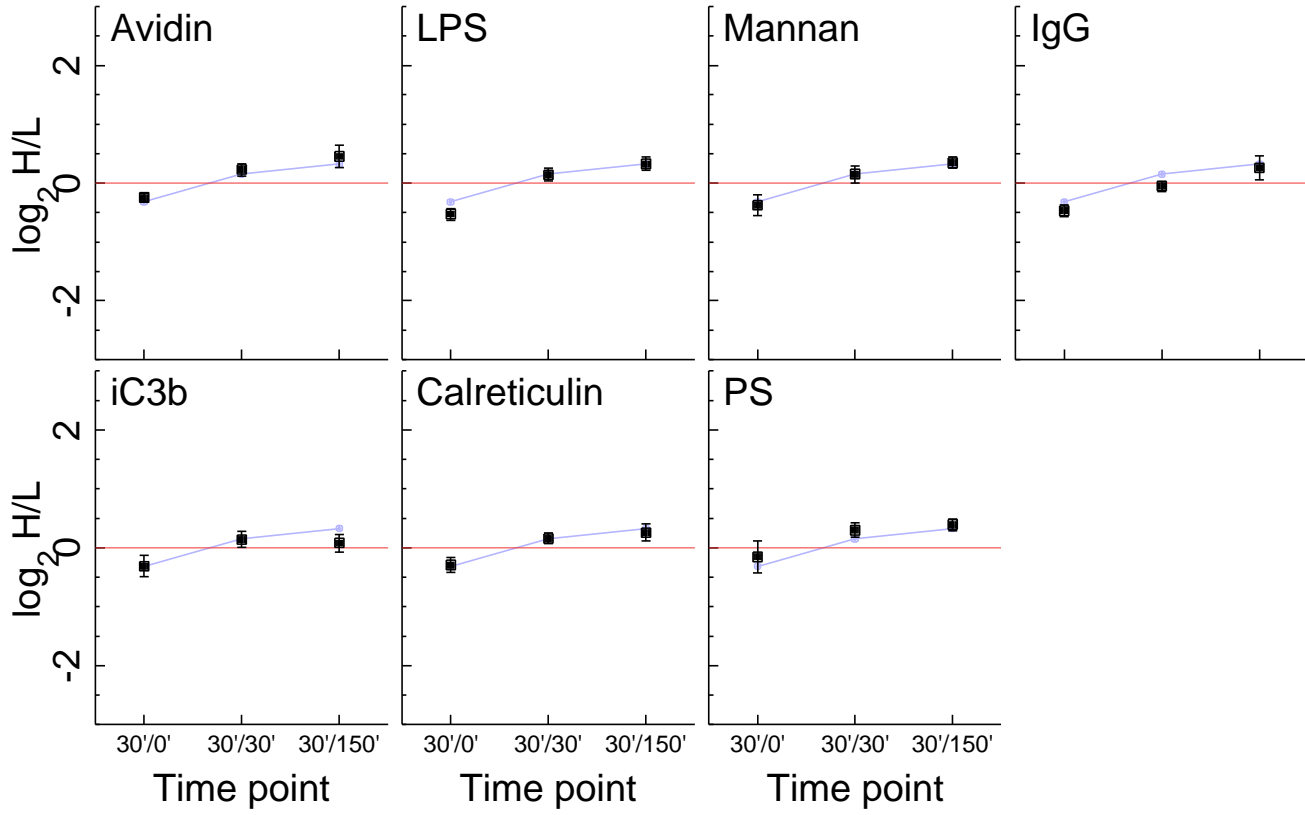

vasp (P70460)

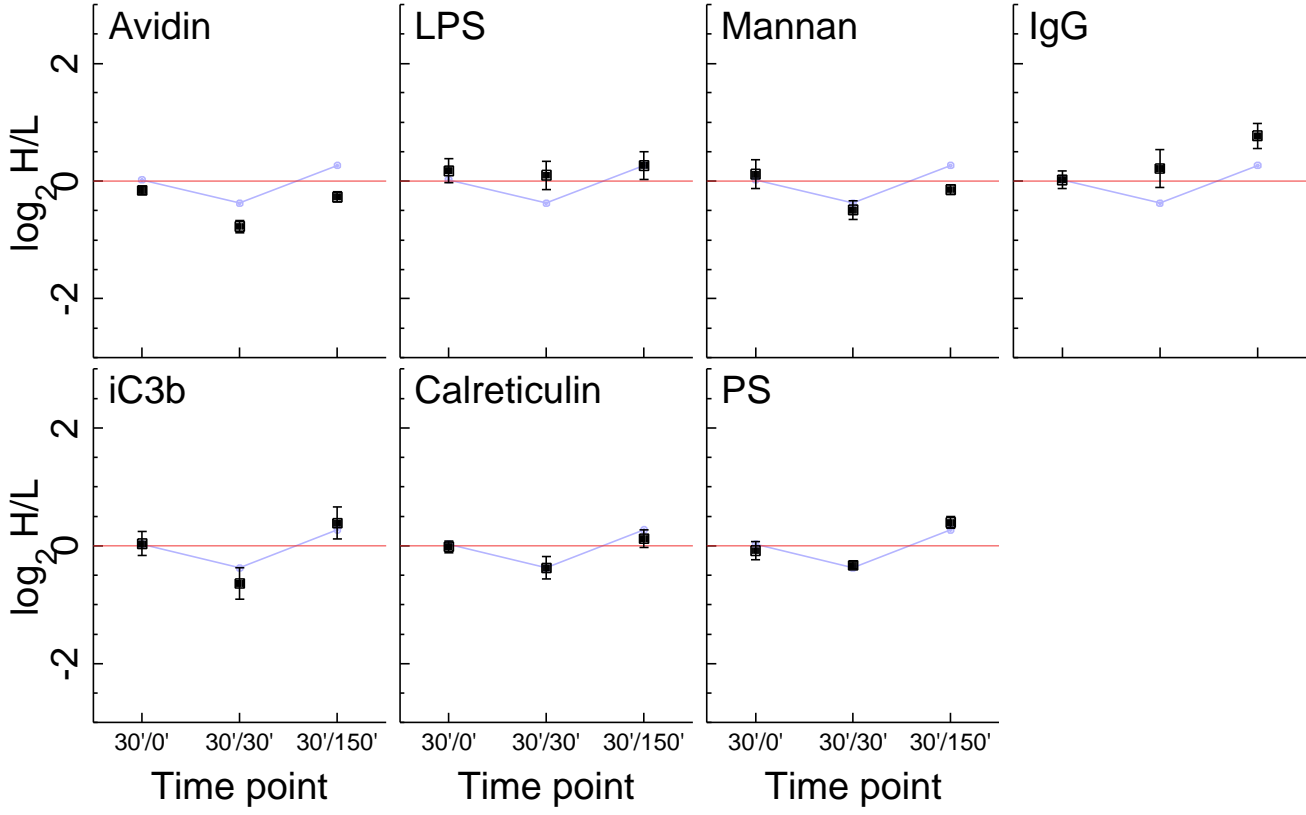

vat1 (Q62465)

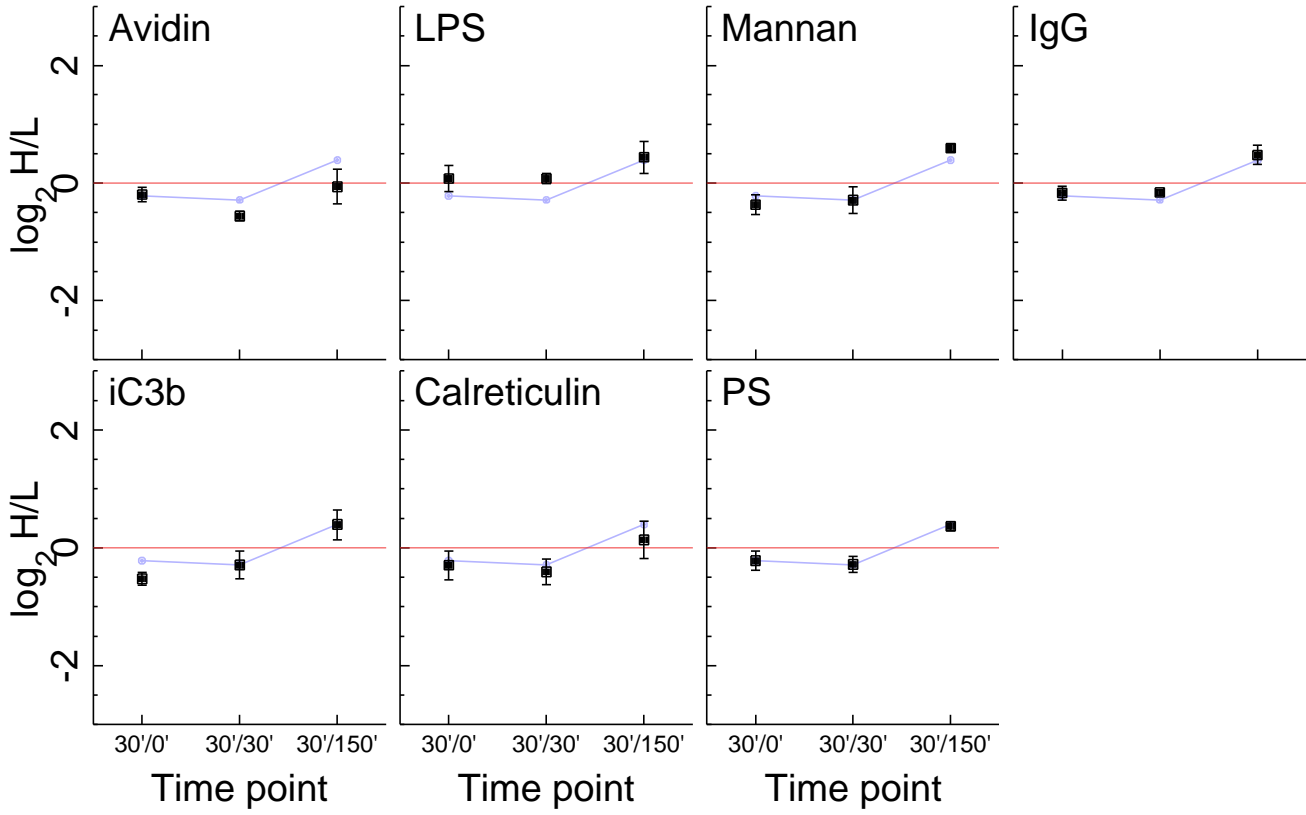

vcp (Q01853)

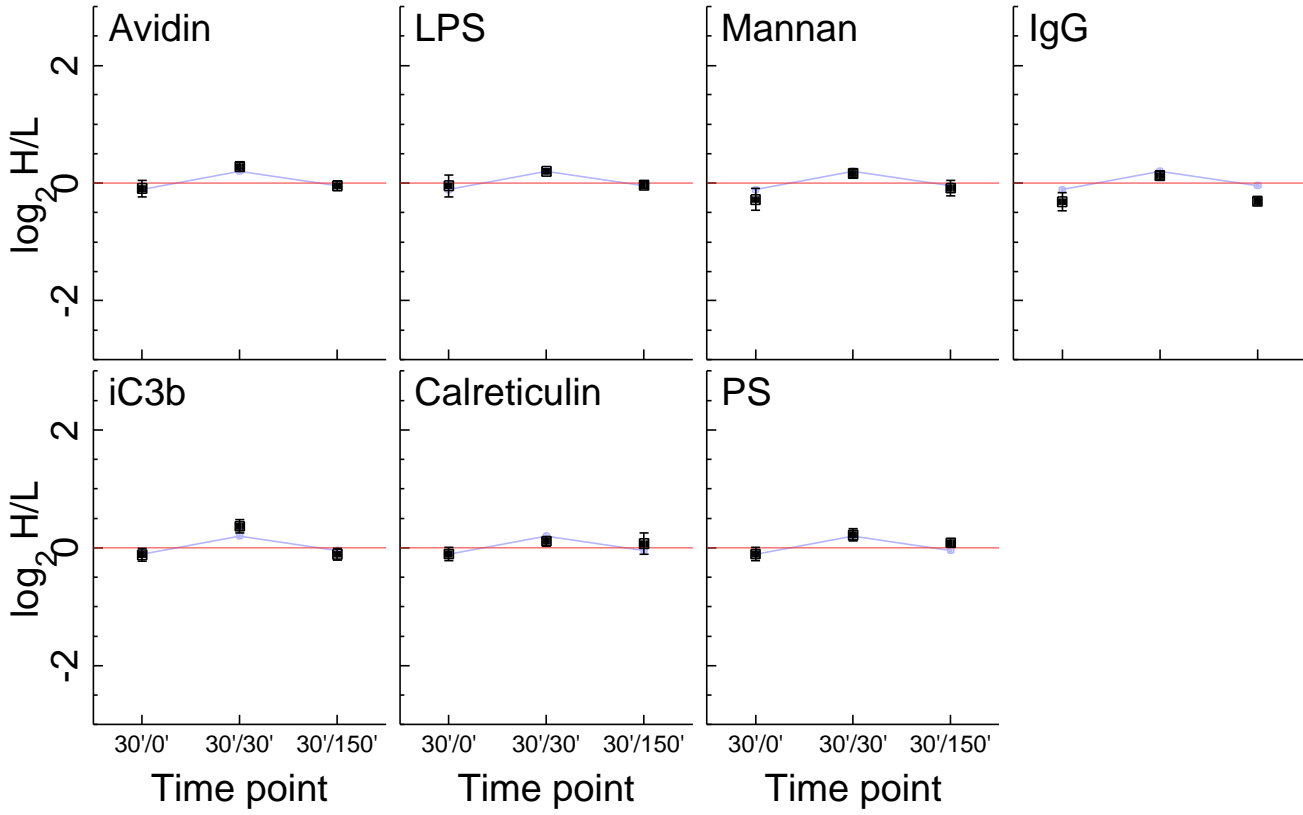

vdac1 (Q60932)

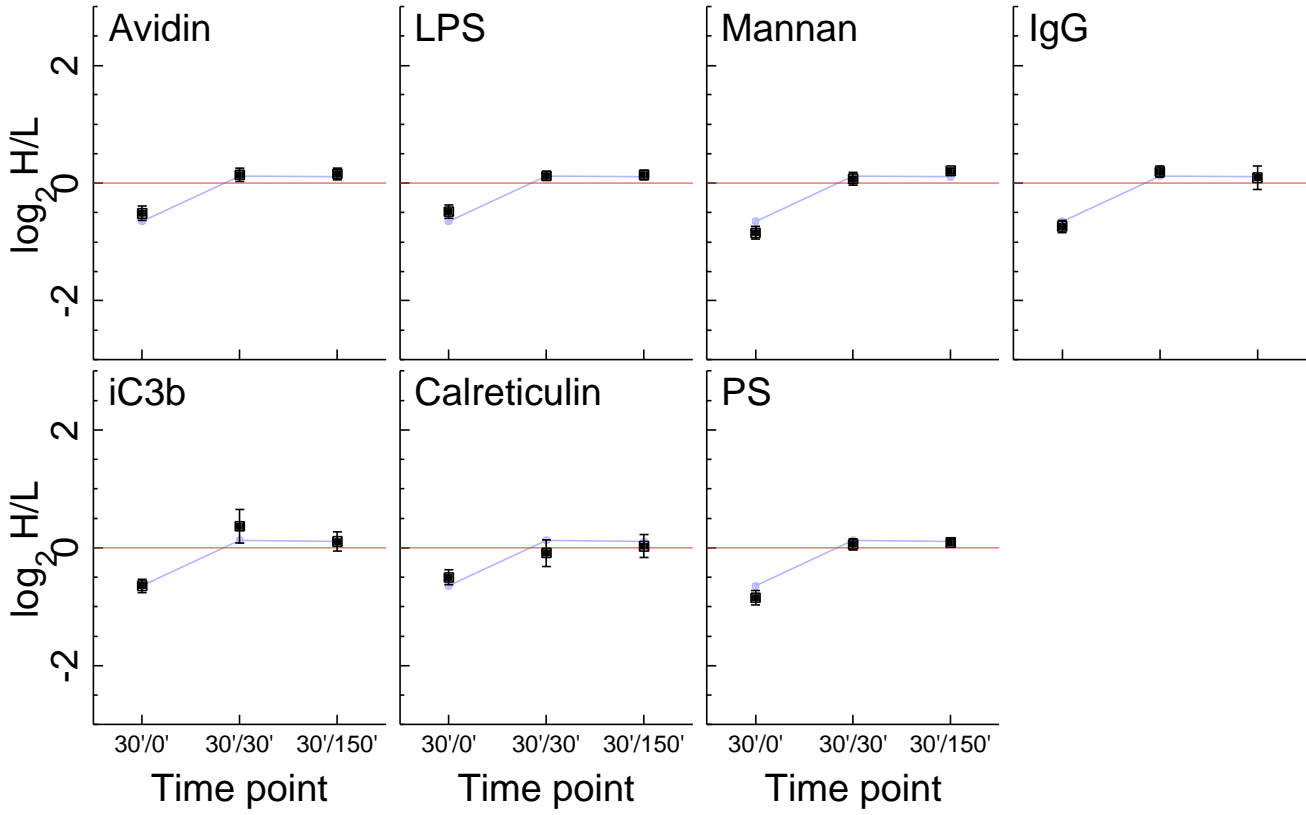

vdac2 (Q60930)

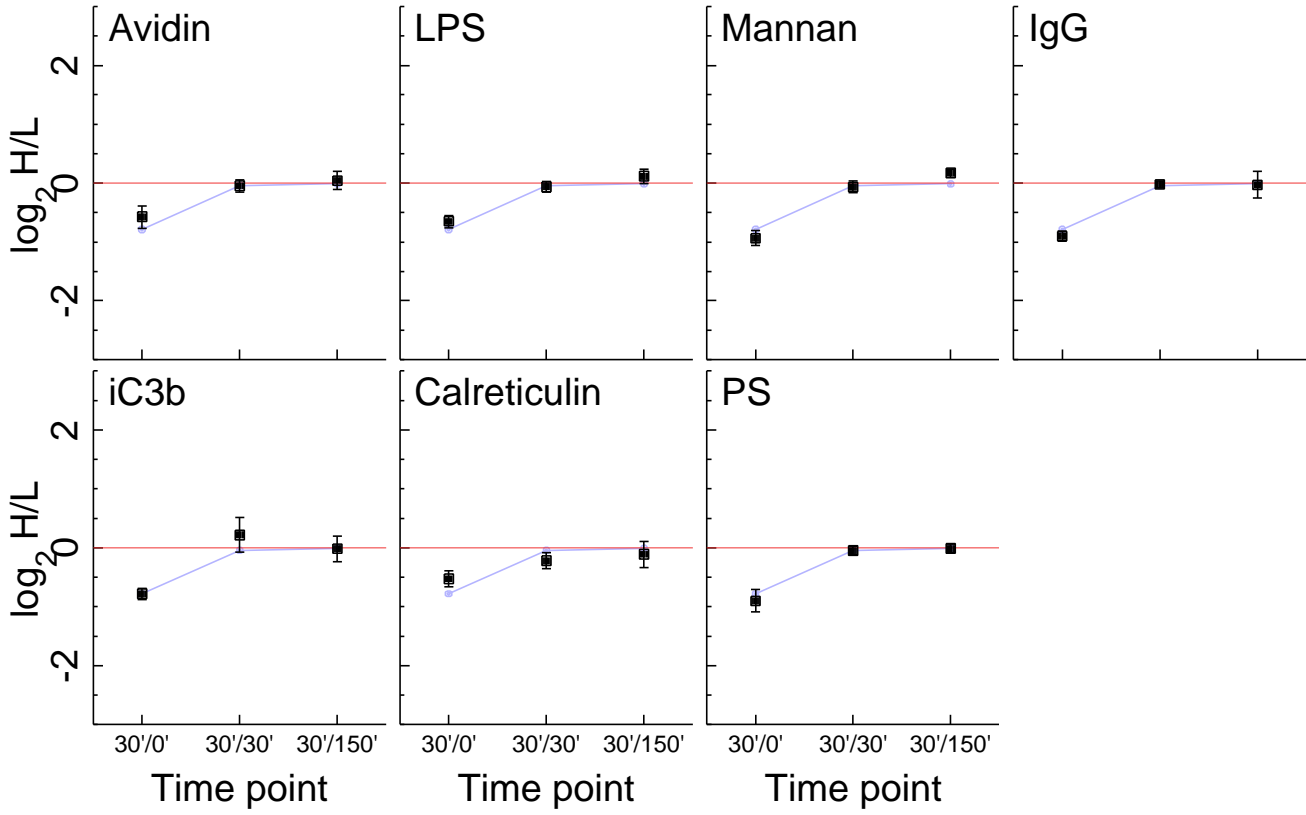

vdac3 (J3QPE8)

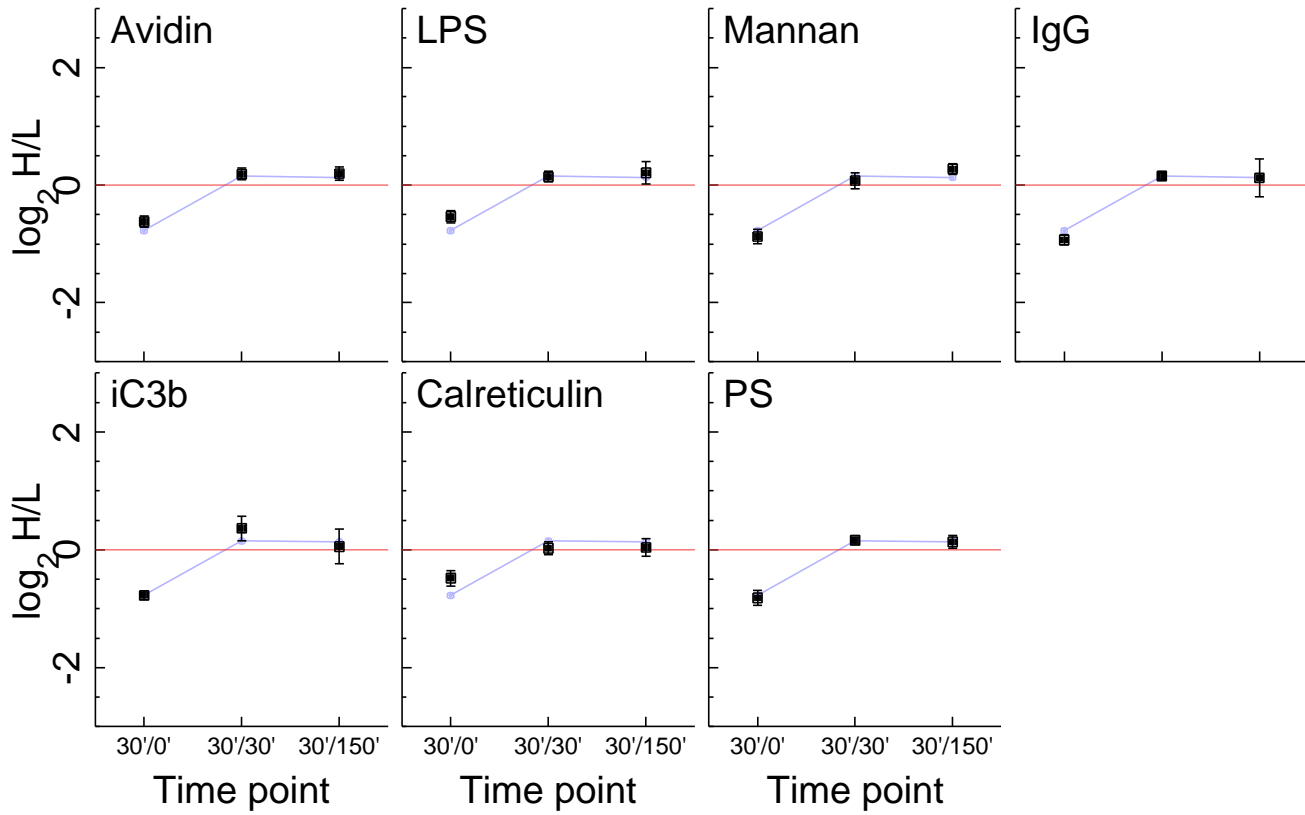



vim (P20152)

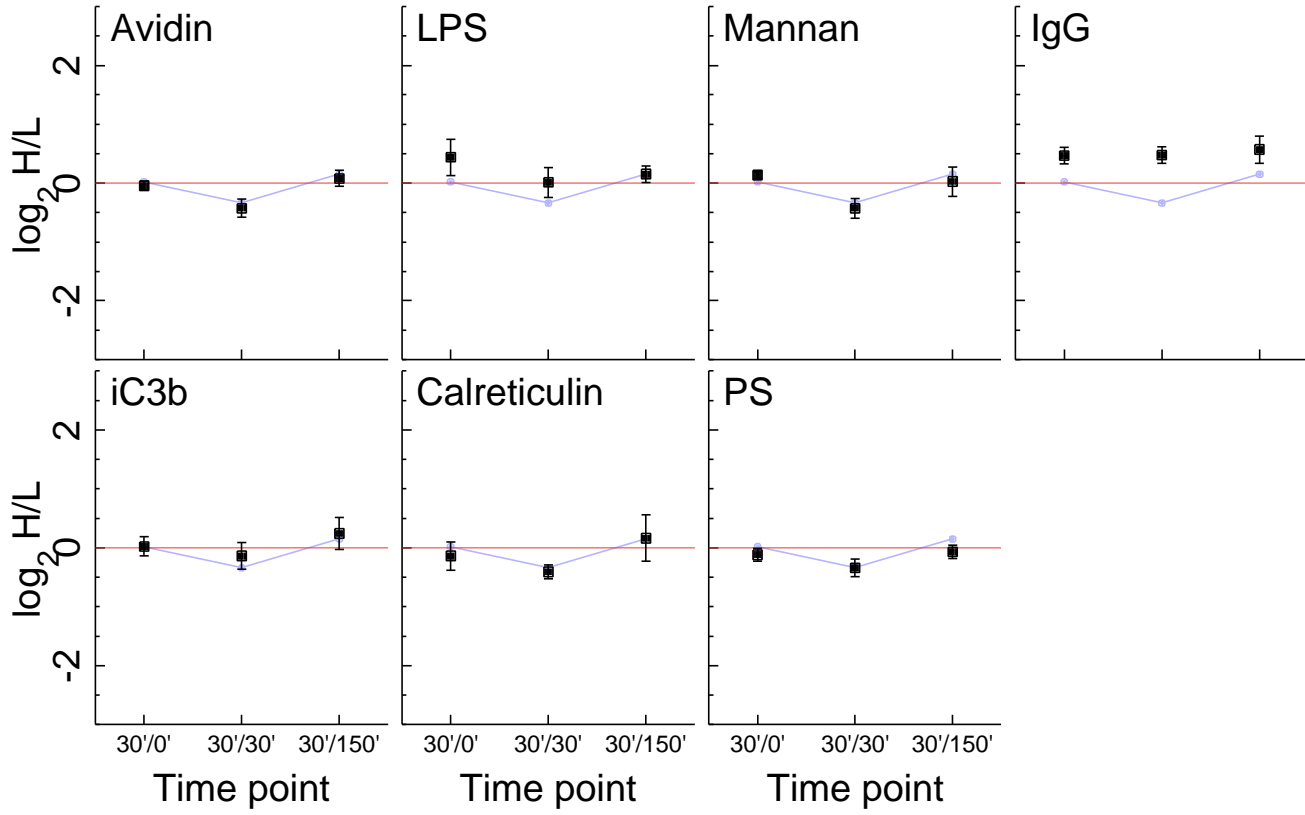

vmp1 (Q99KU0)

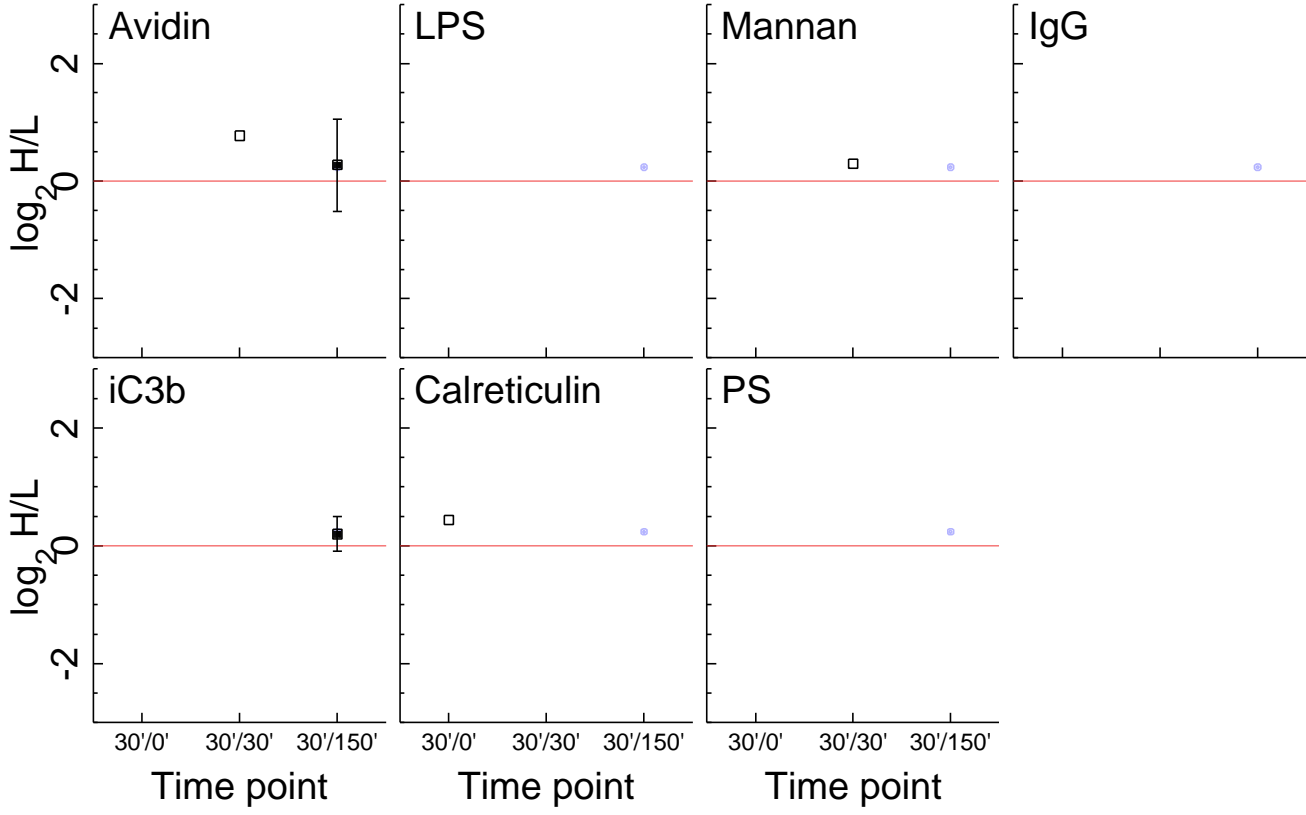

vnn1 (Q9Z0K8)

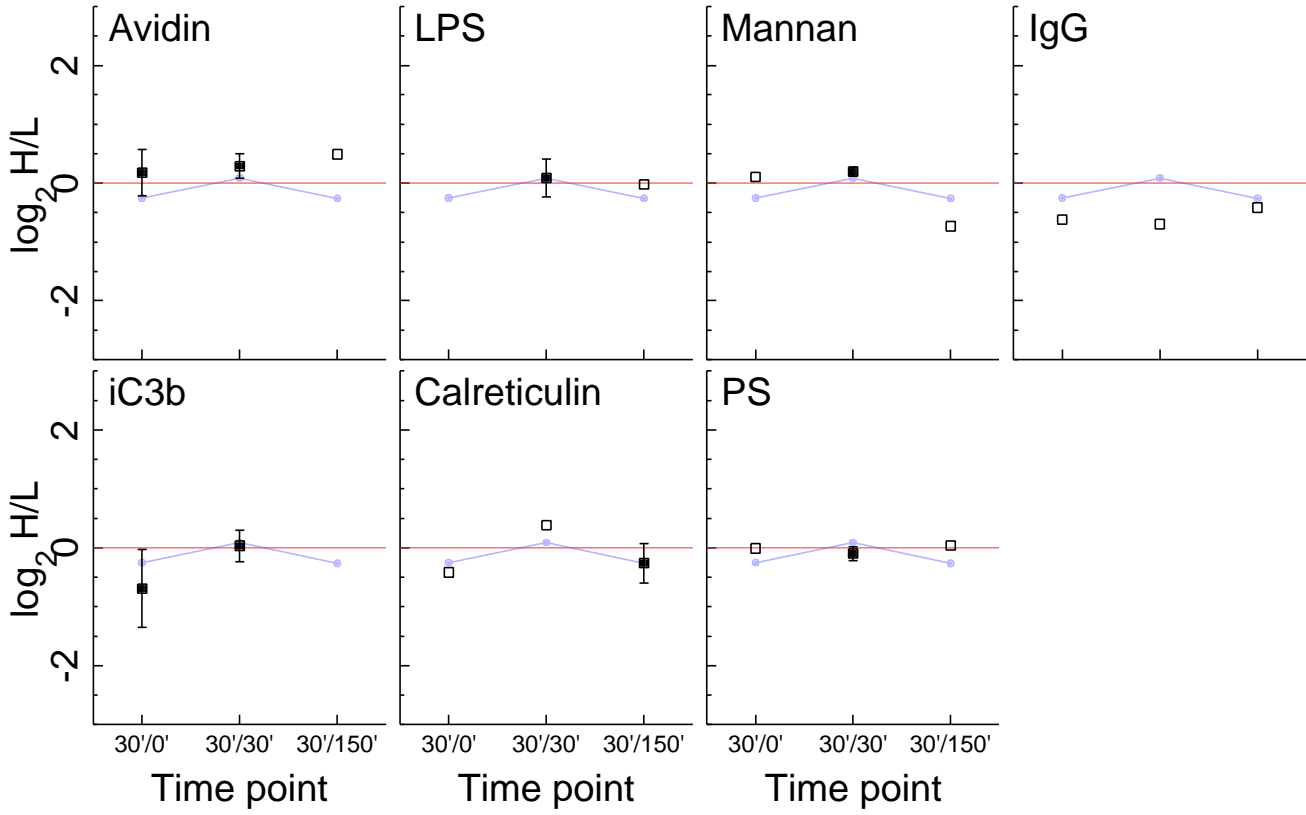

### vnn3 (Q9QZ25)

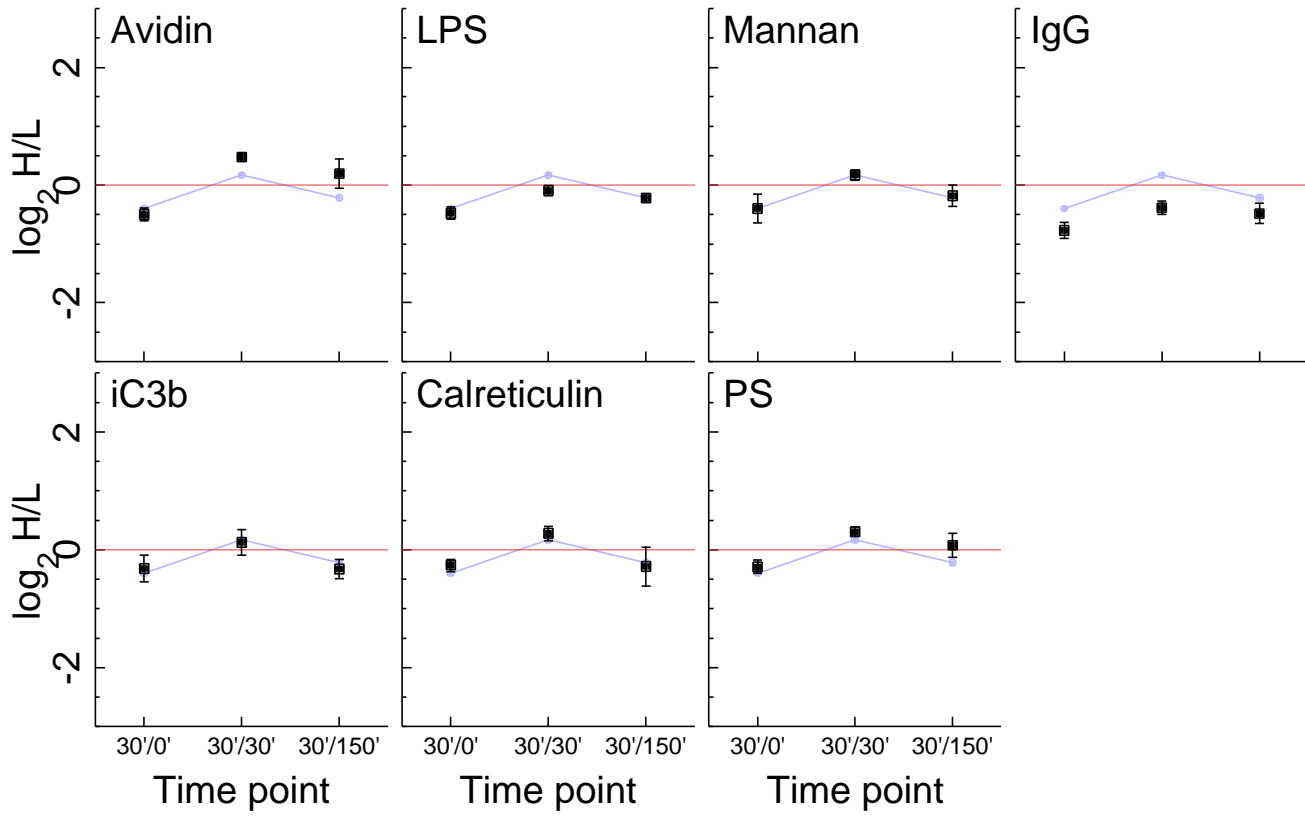

vps11 (Q91W86)

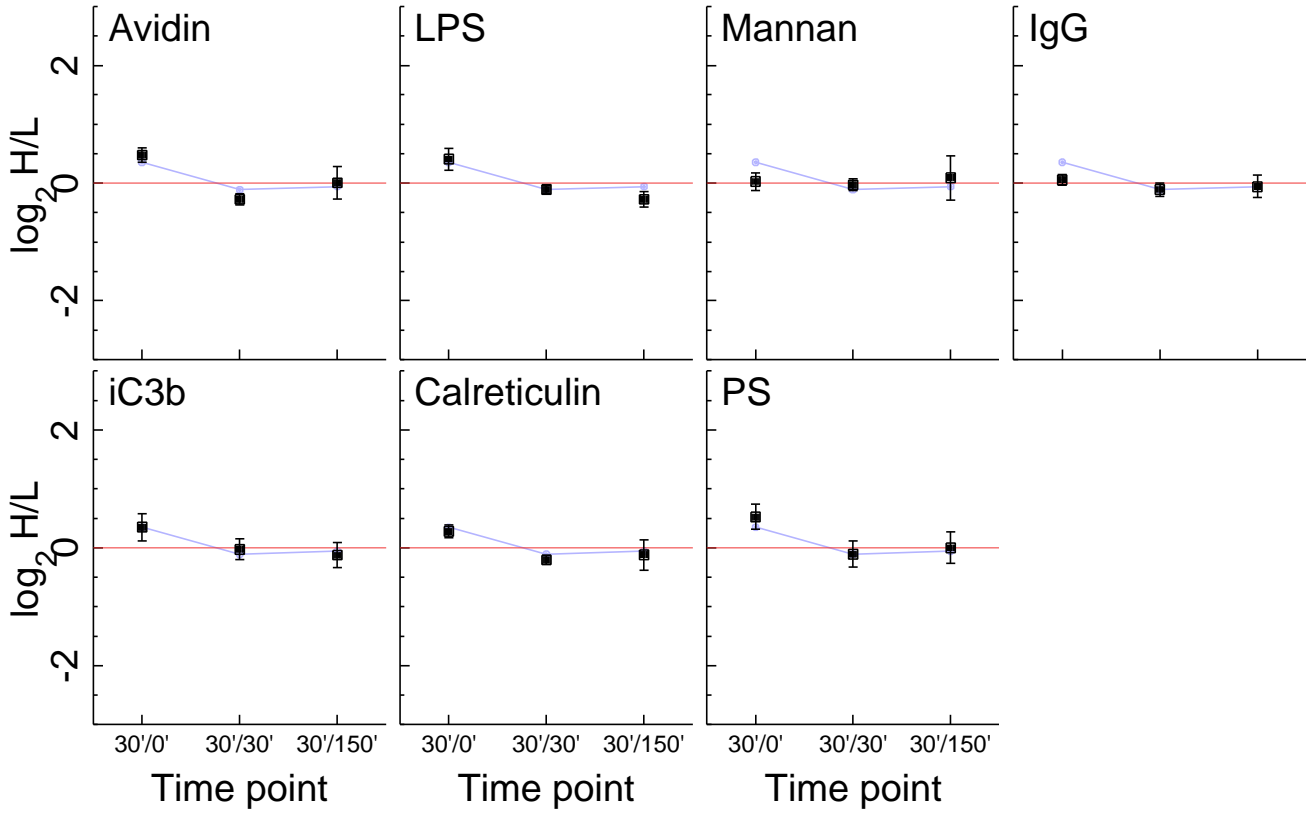

### vps13c (Q8BX70)

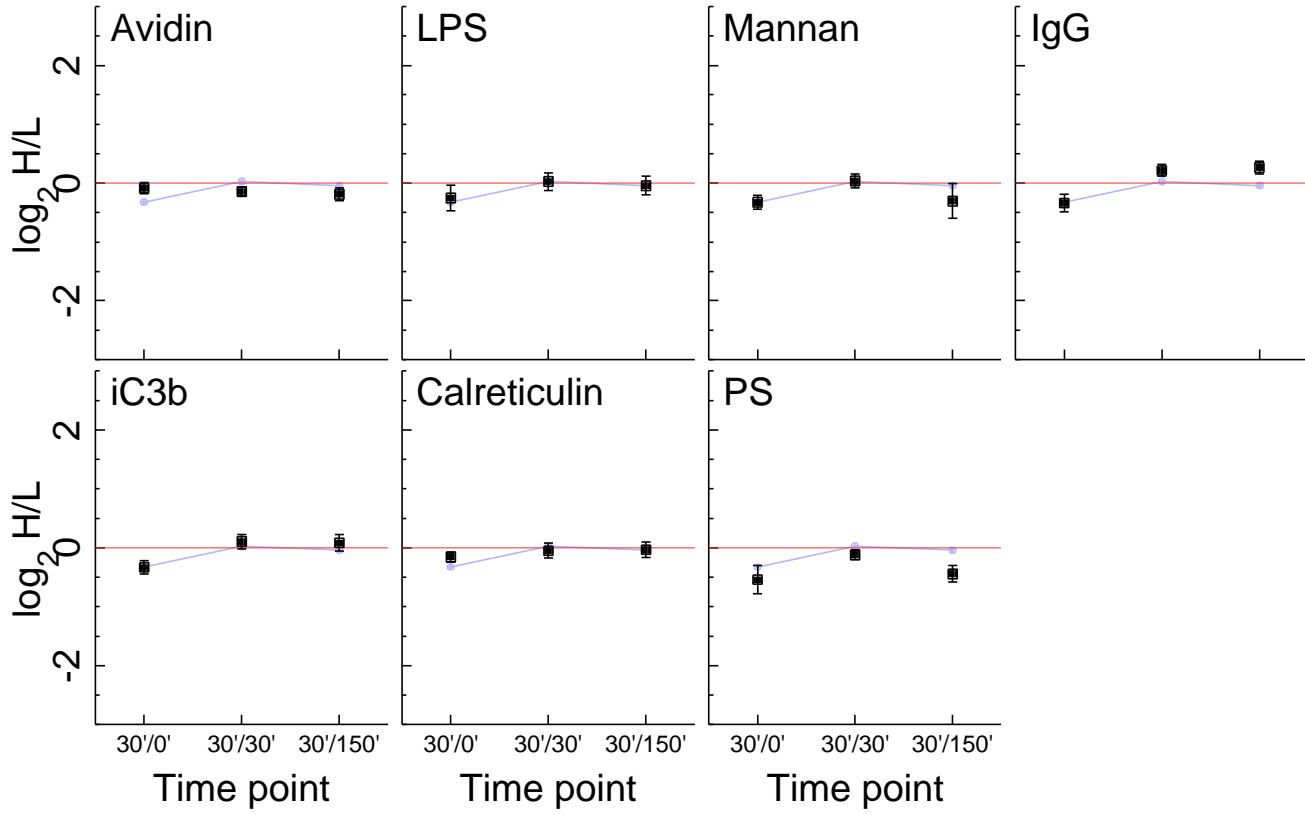

### vps13d (B1ART2)

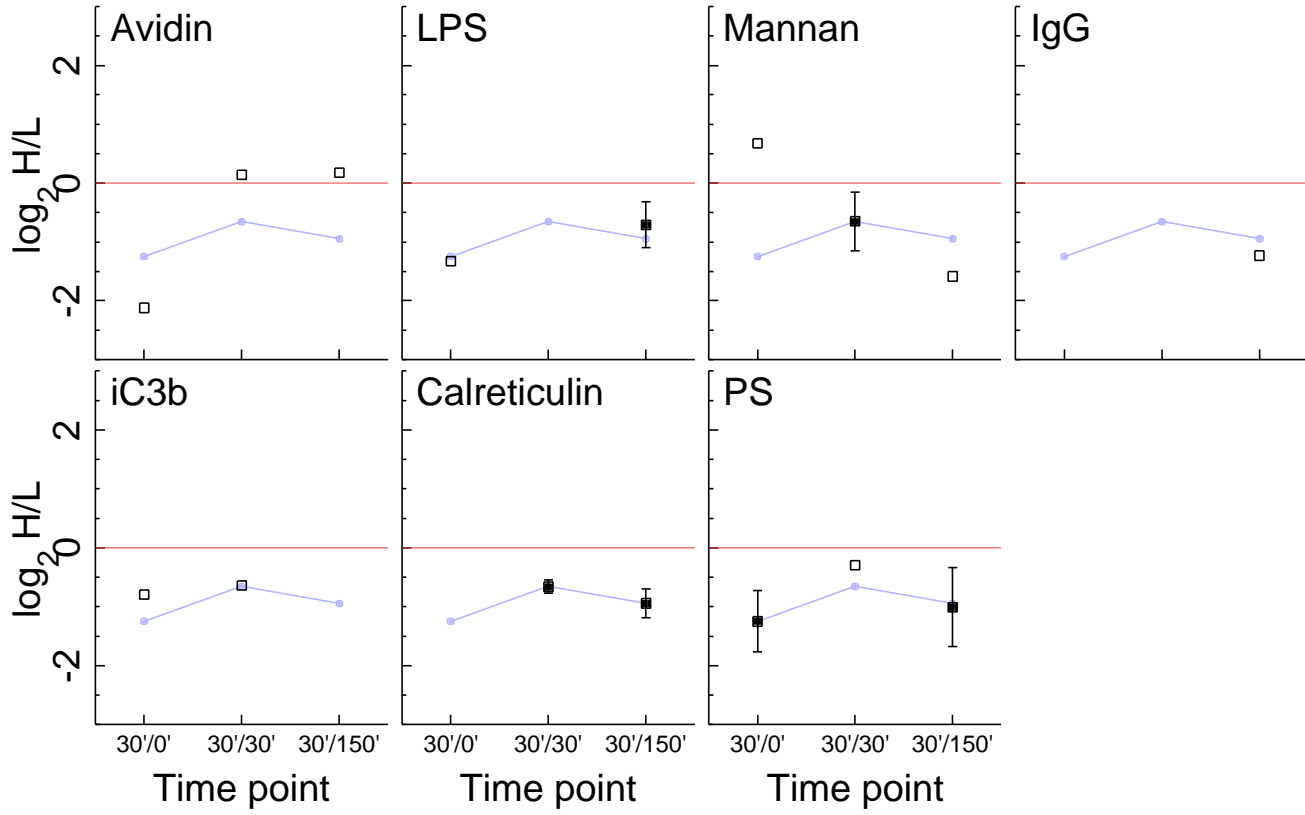

### vps16 (G3X8X7)

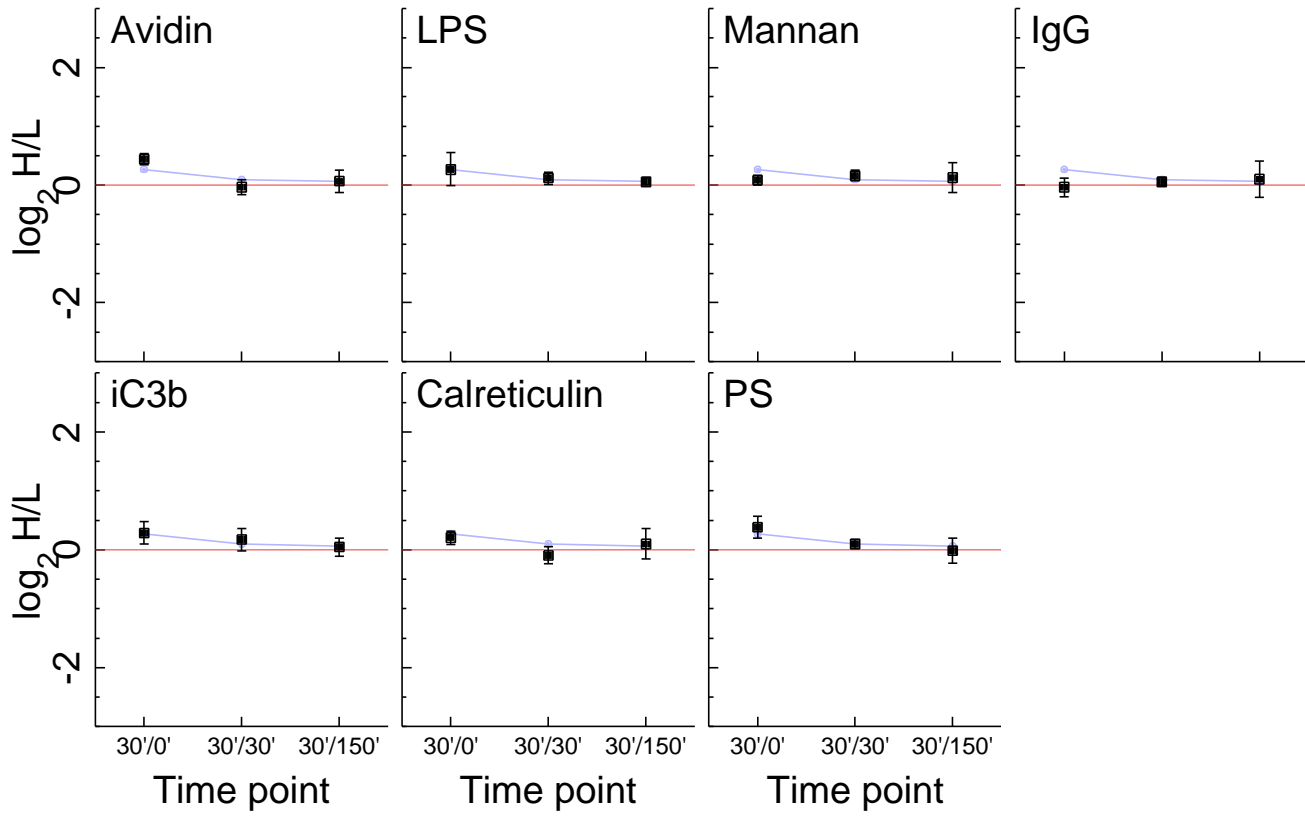



### vps18 (Q8R307)

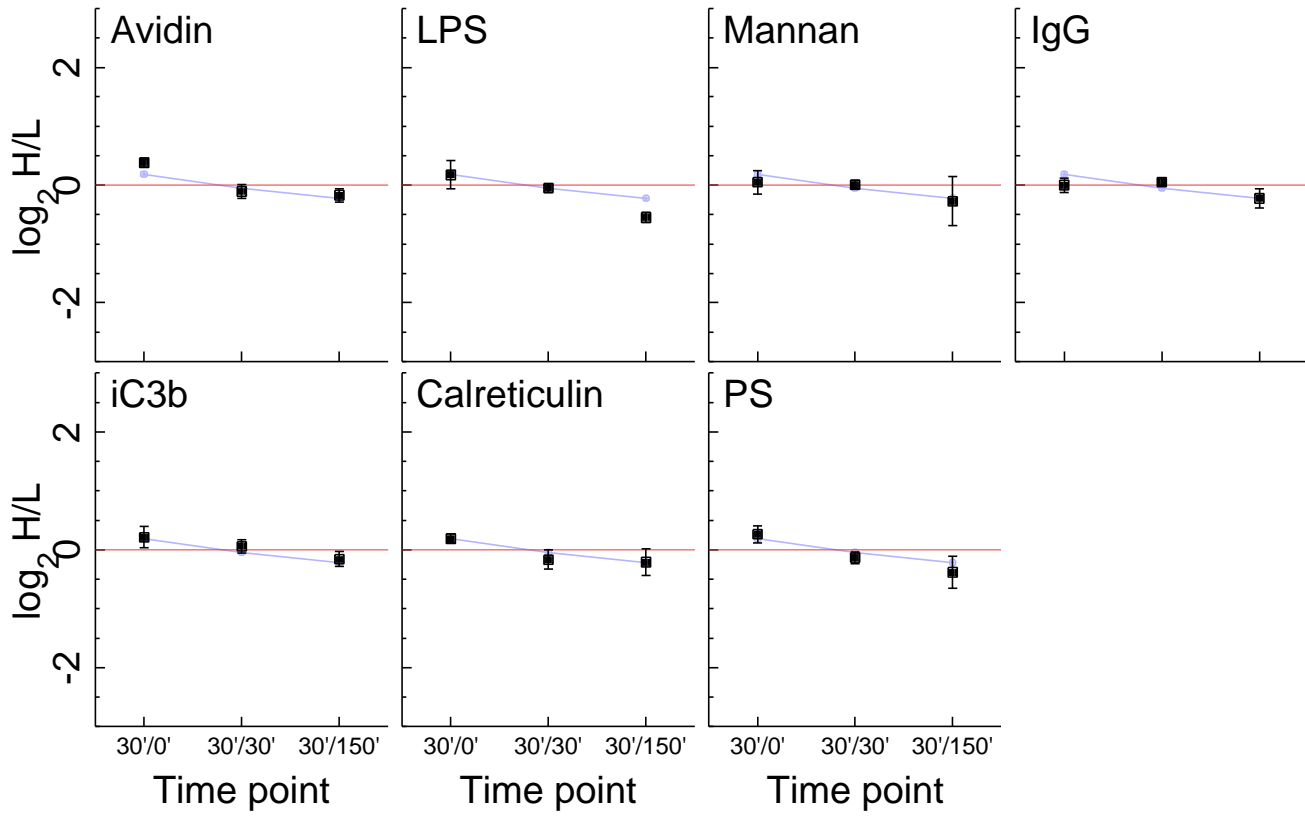

vps26a (P40336)

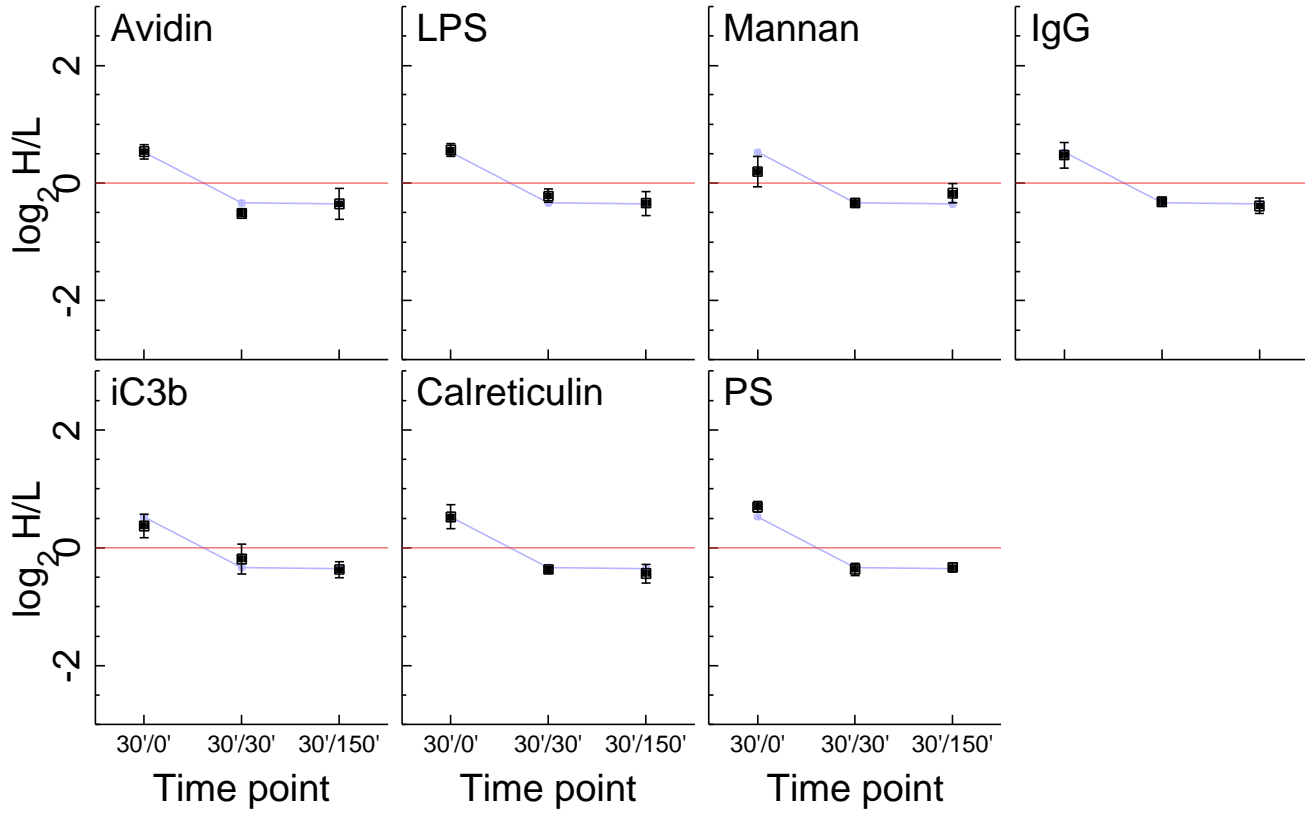

vps26b (Q8C0E2)

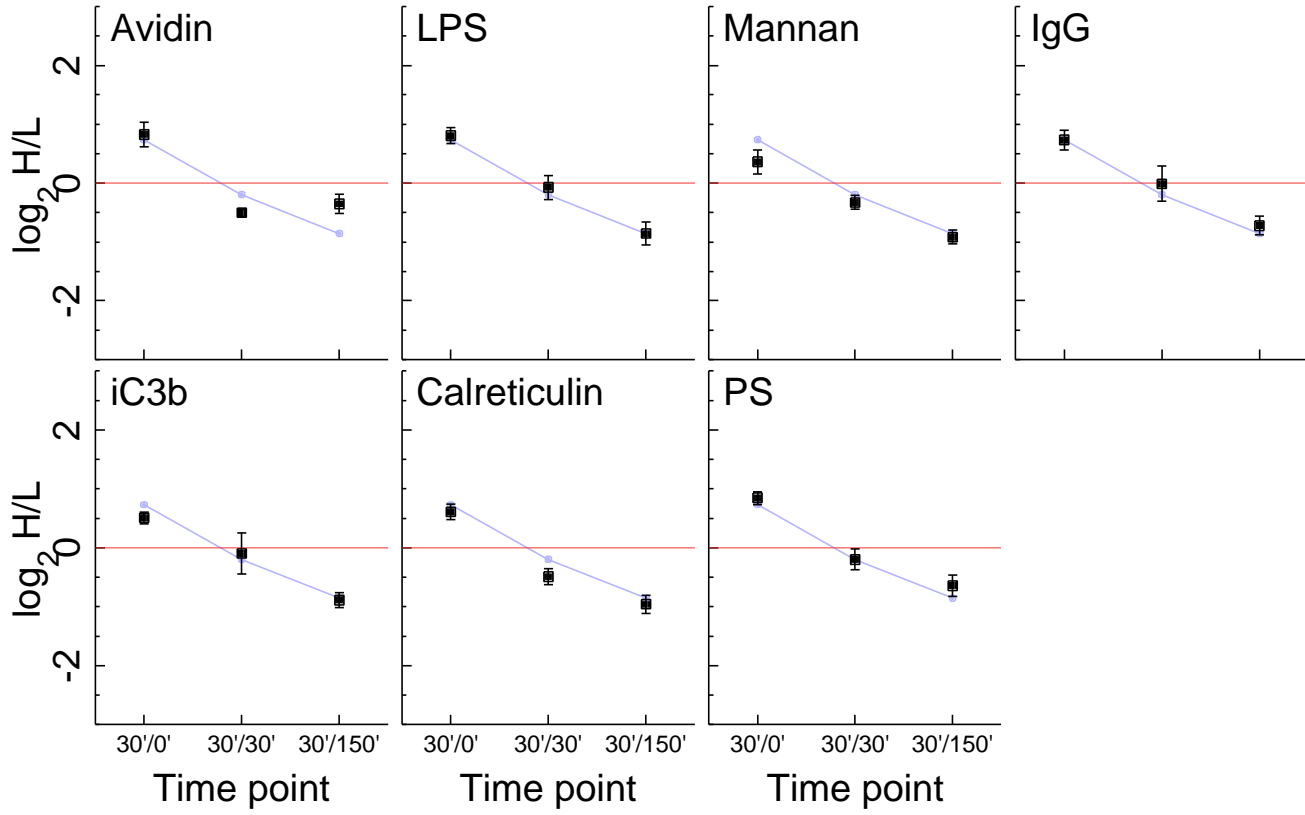

vps28 (Q9D1C8)

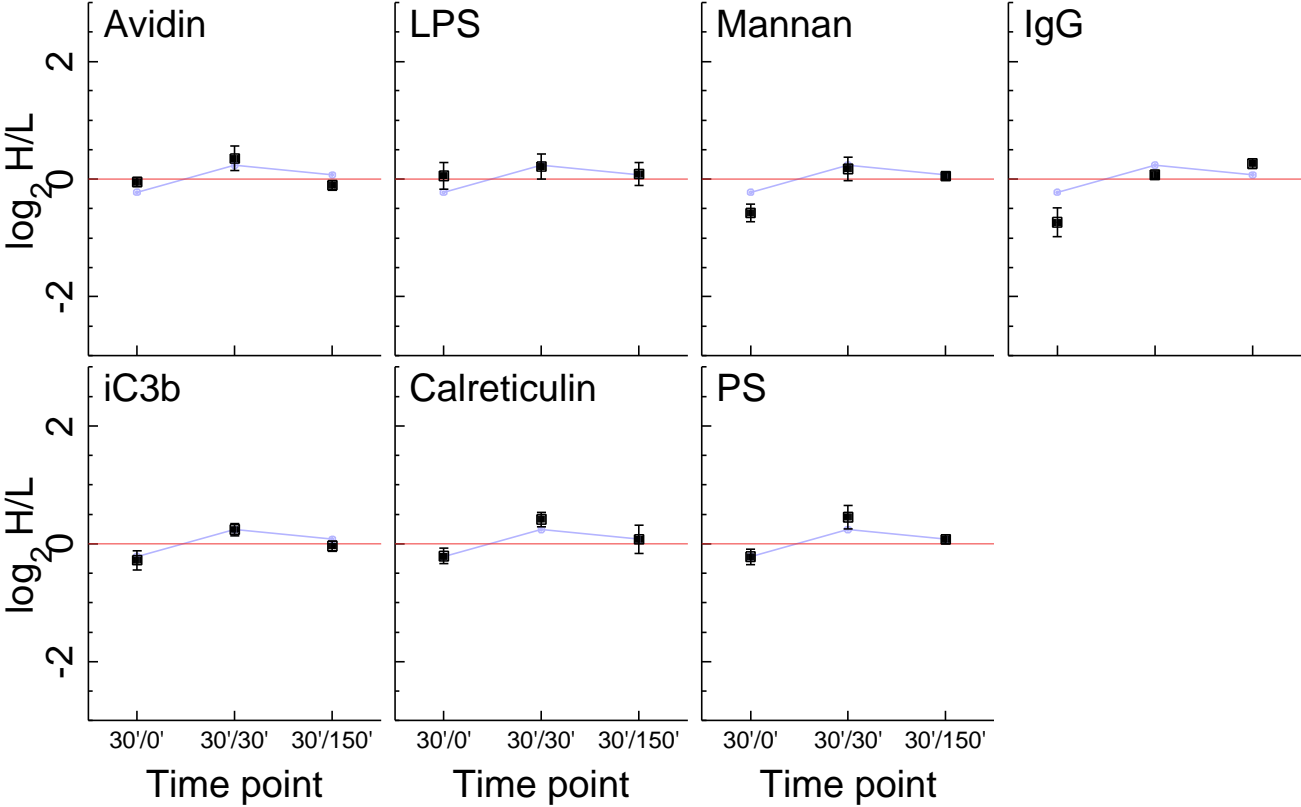

vps29 (Q9QZ88)

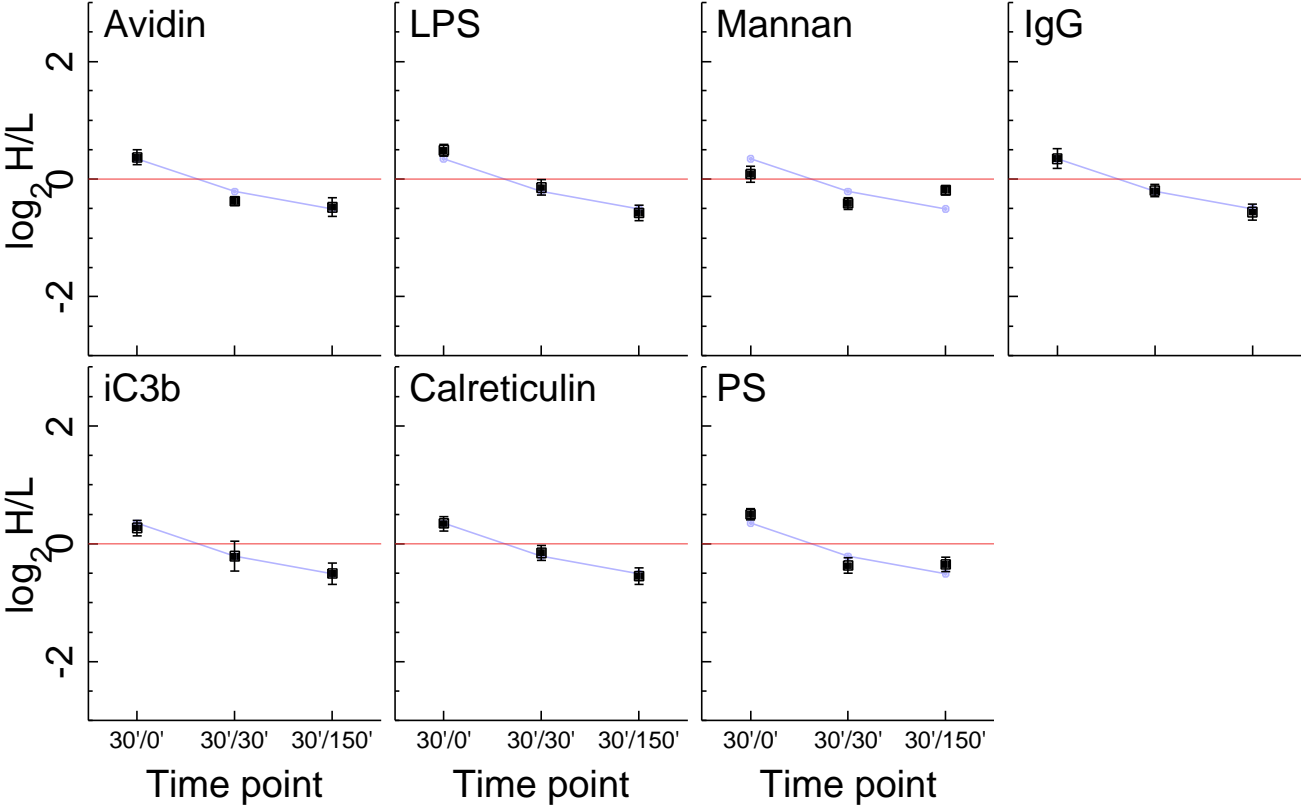

### vps33a (Q9D2N9)

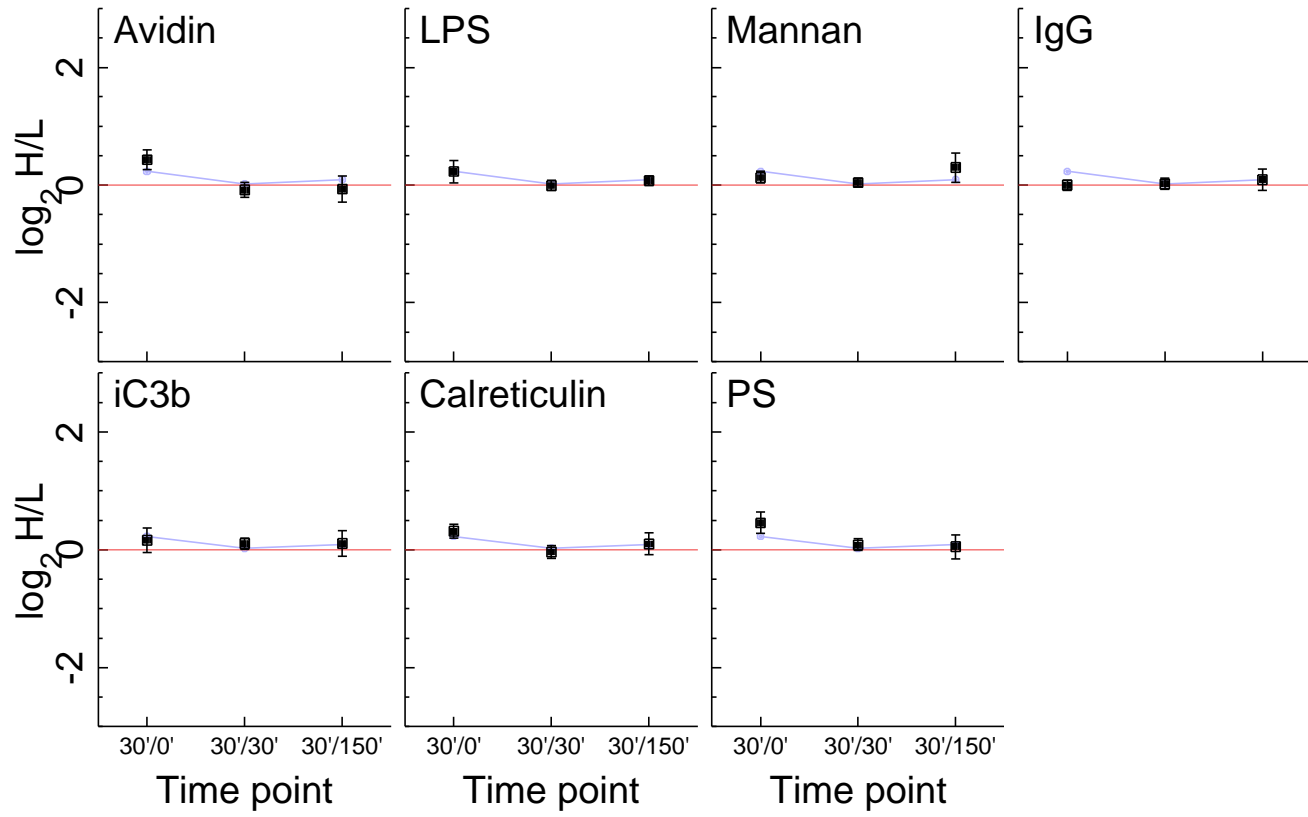

### vps33b (P59016)

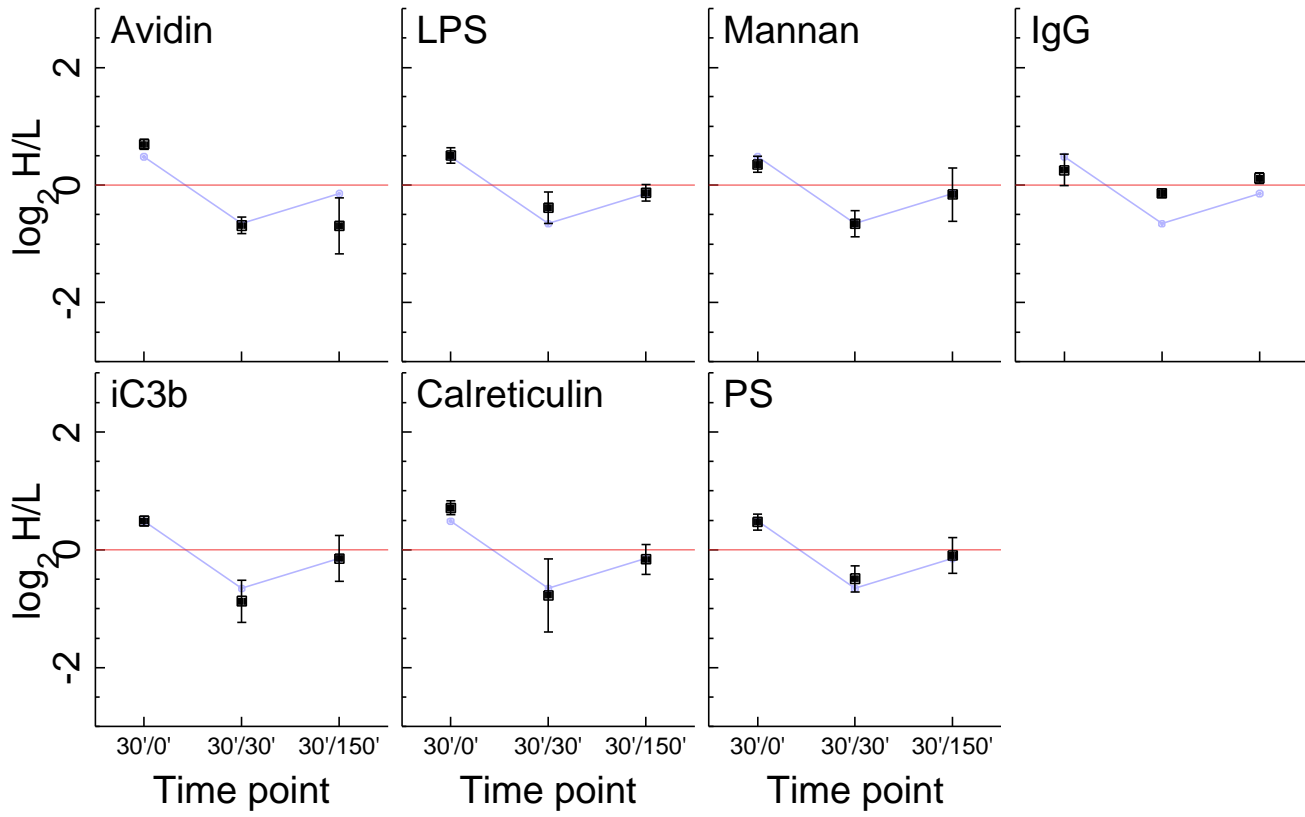

### vps35 (Q9EQH3)

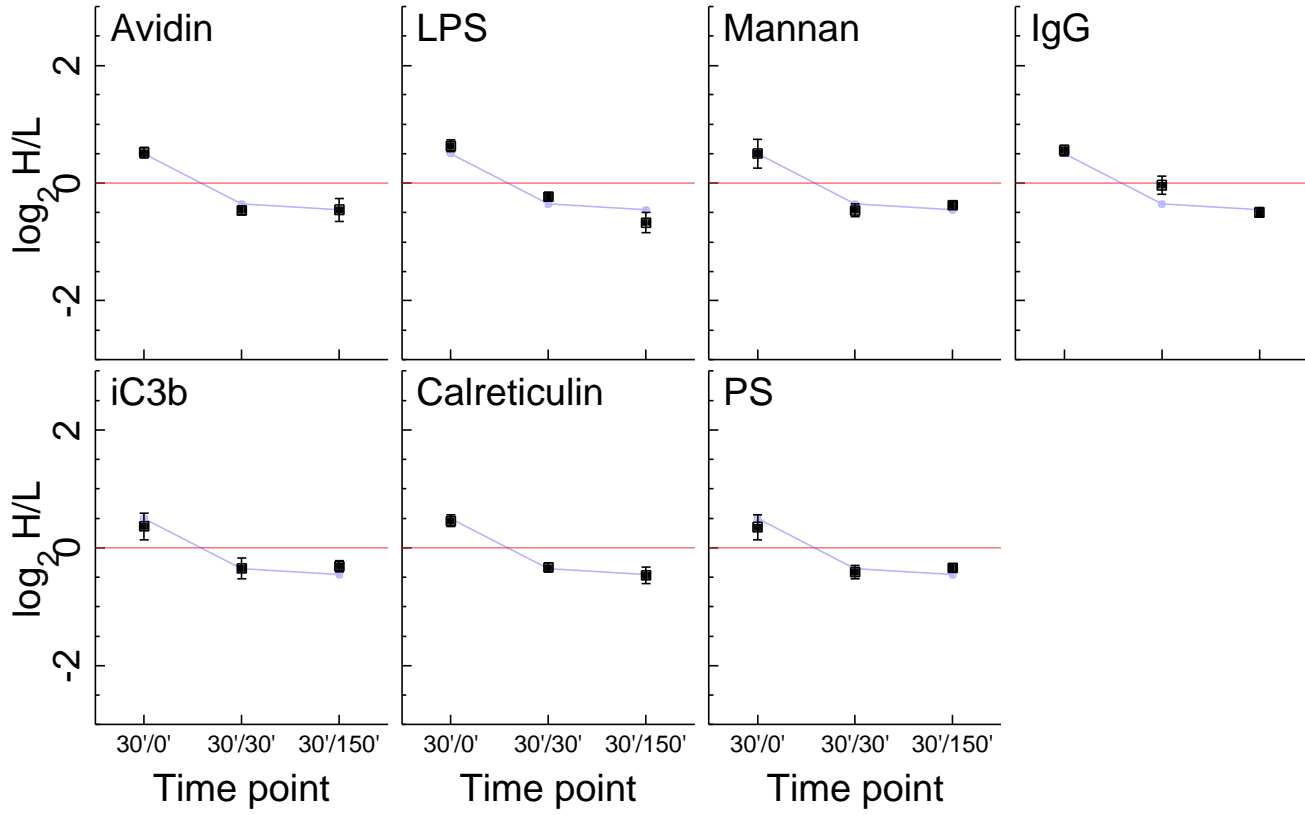



### vps37b (Q8R0J7)

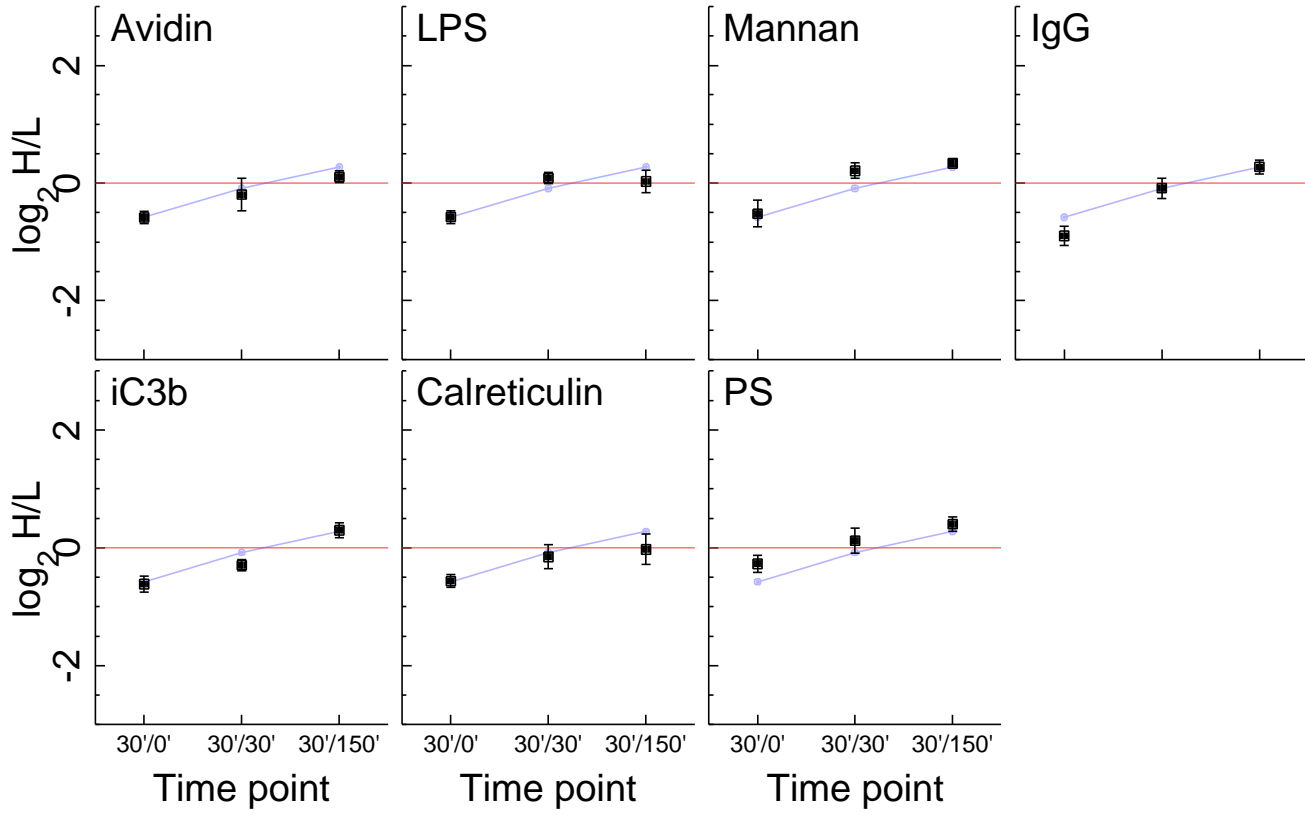

vps37c (Q8R105)

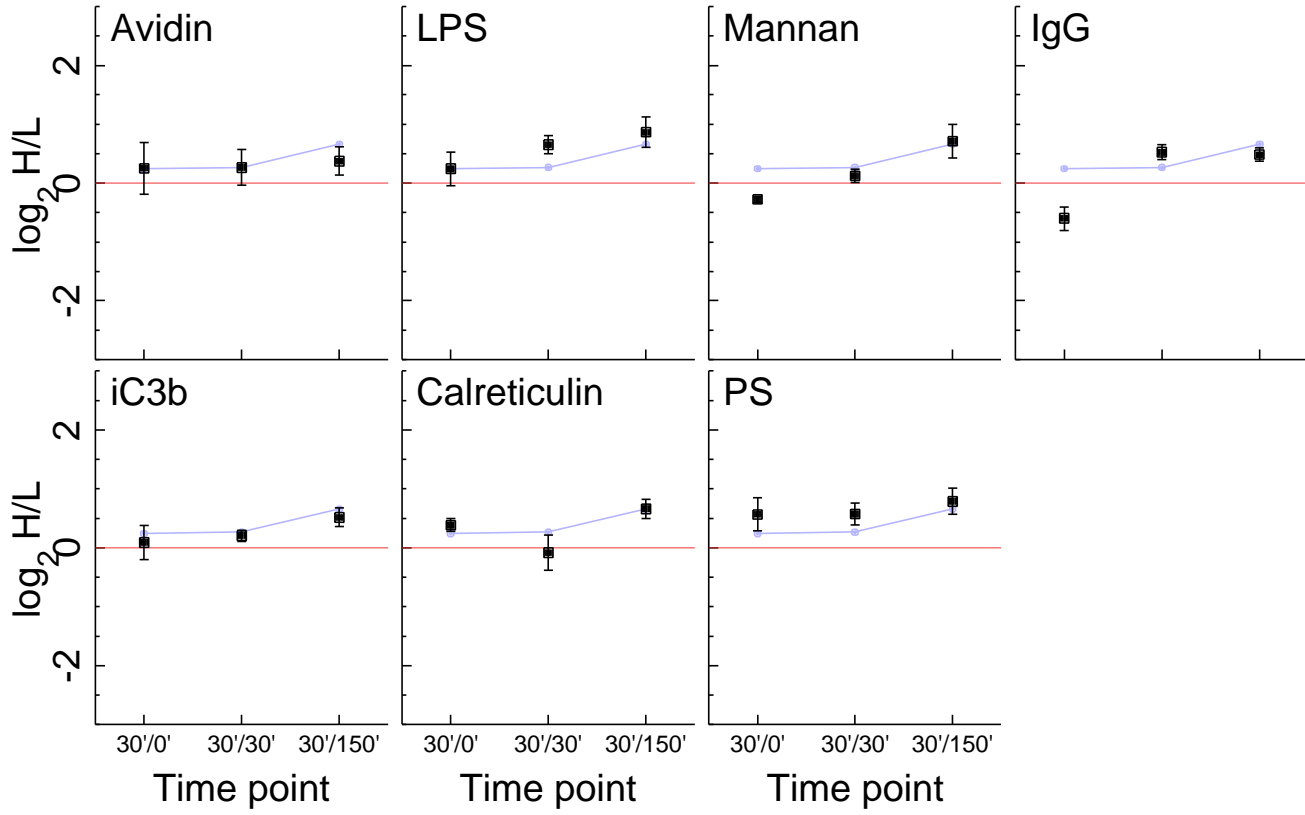

### vps39 (Q8R5L3)

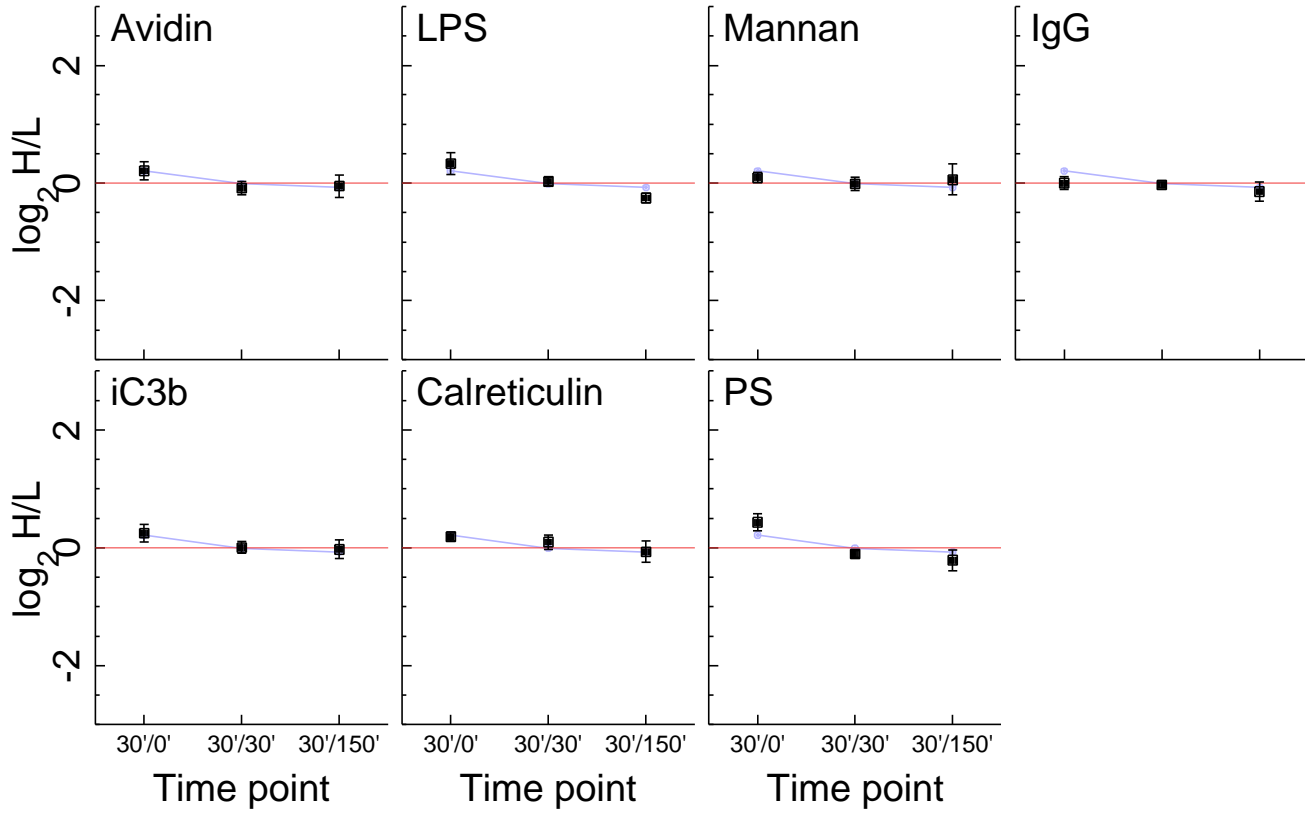

vps41 (Q5KU39)

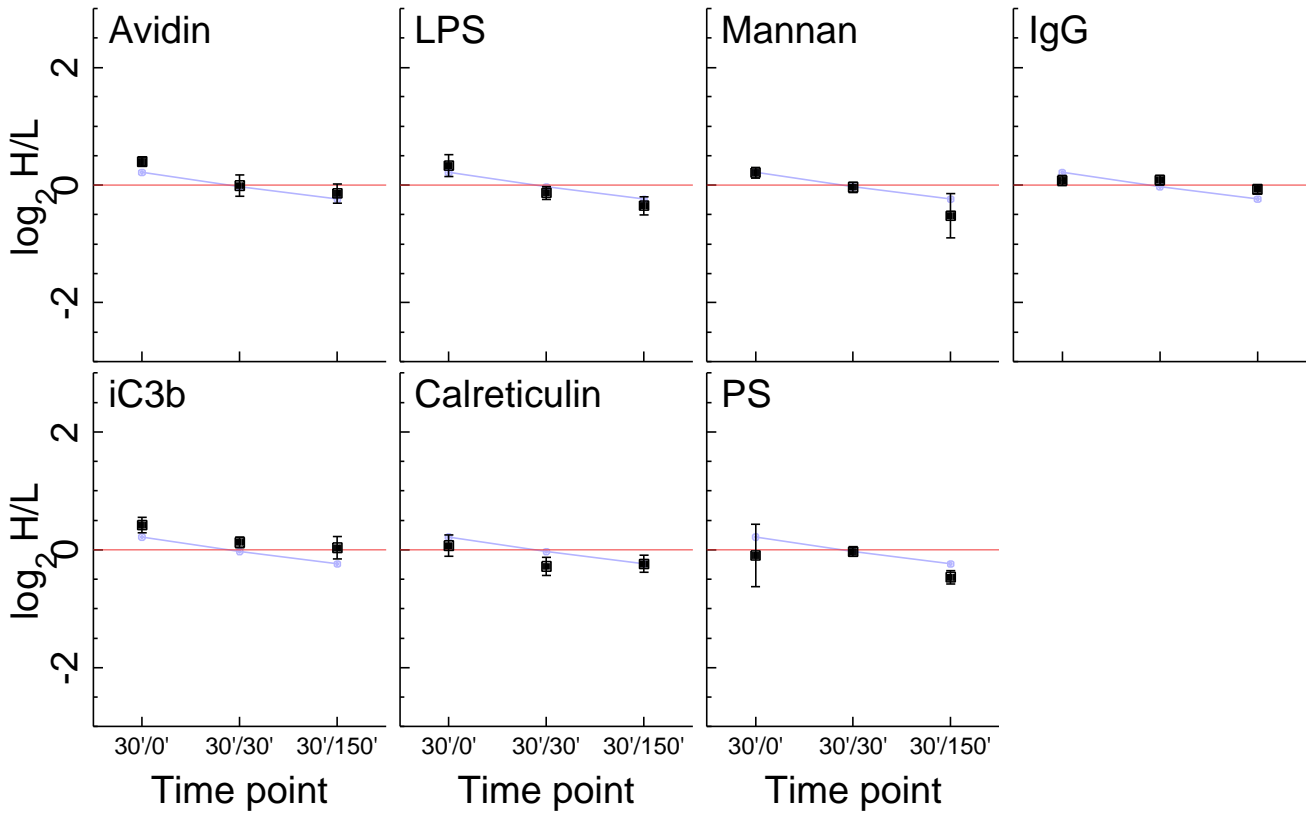

### vps45 (P97390)

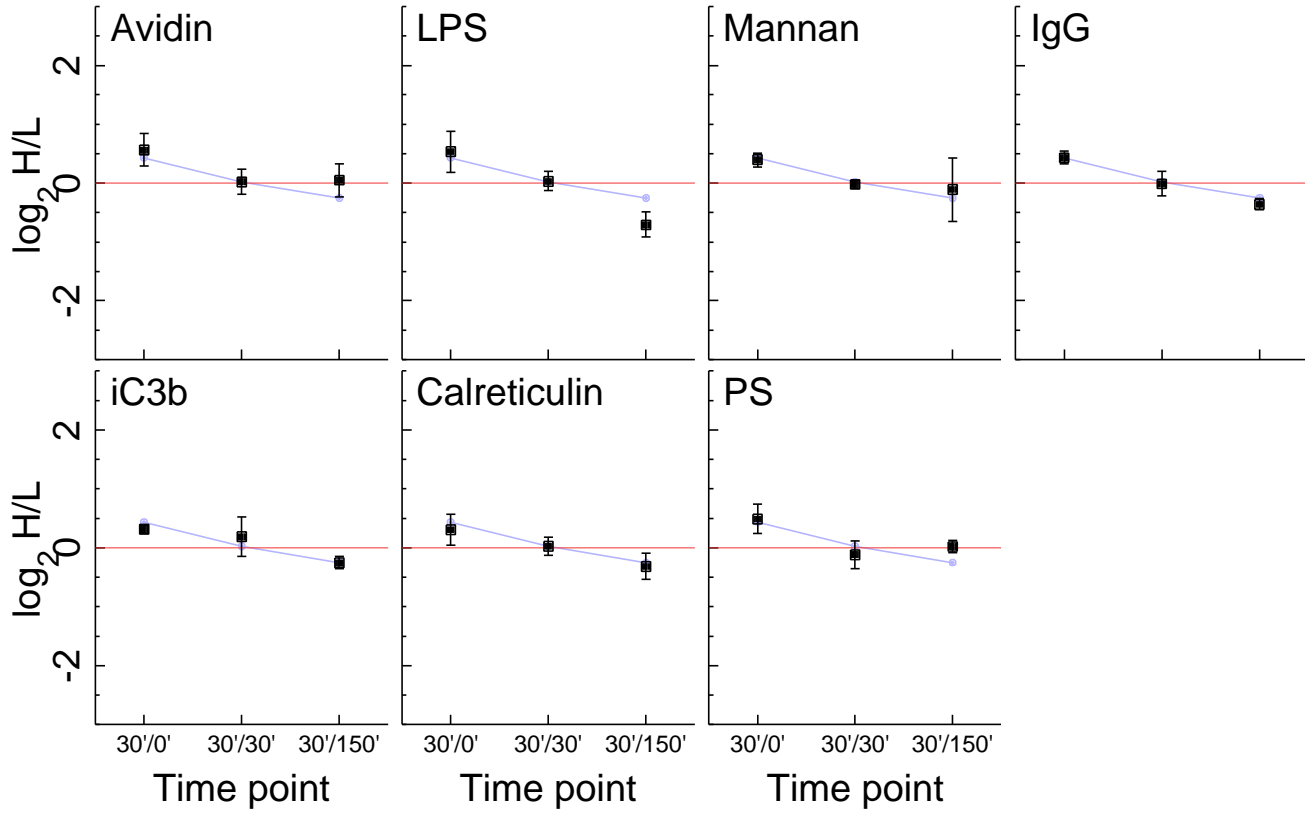

vps4a (Q8VEJ9)

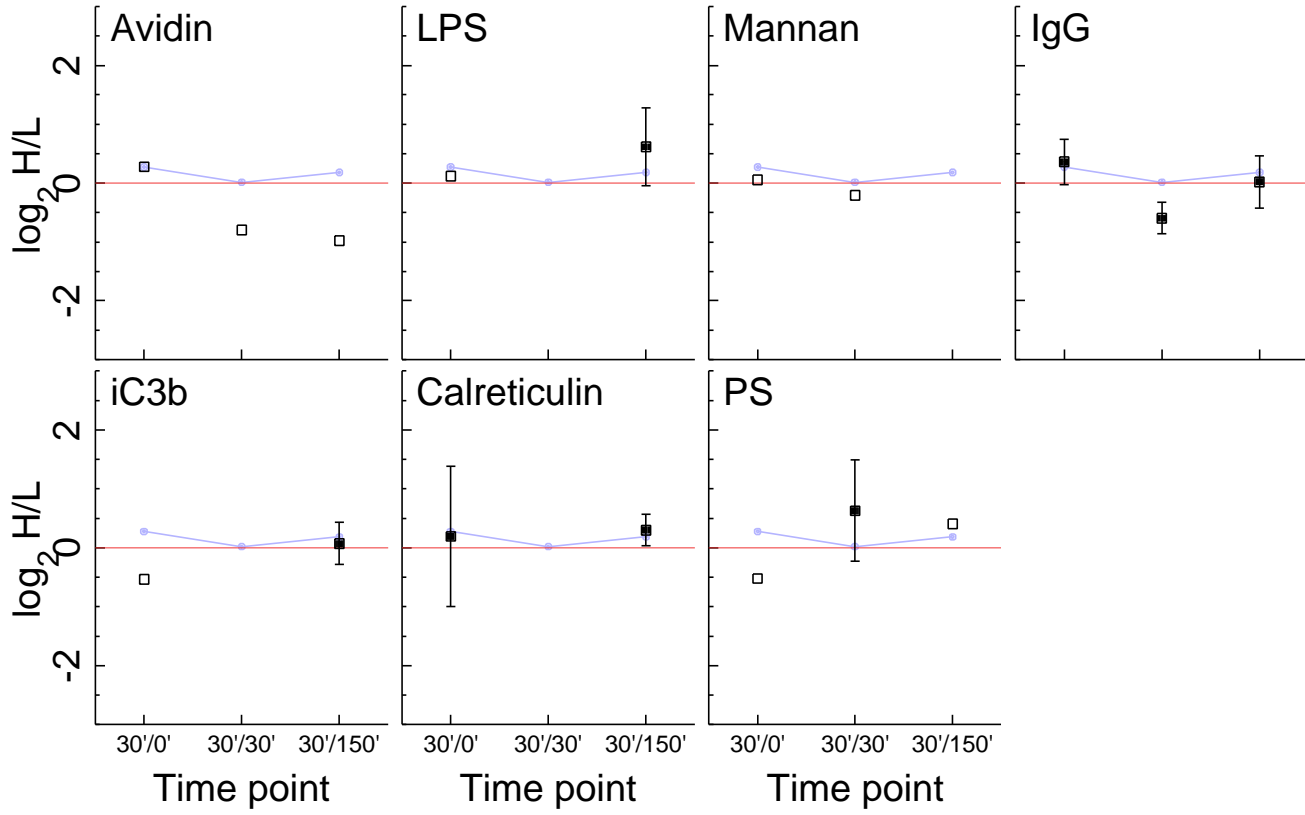

### vps4b (P46467)

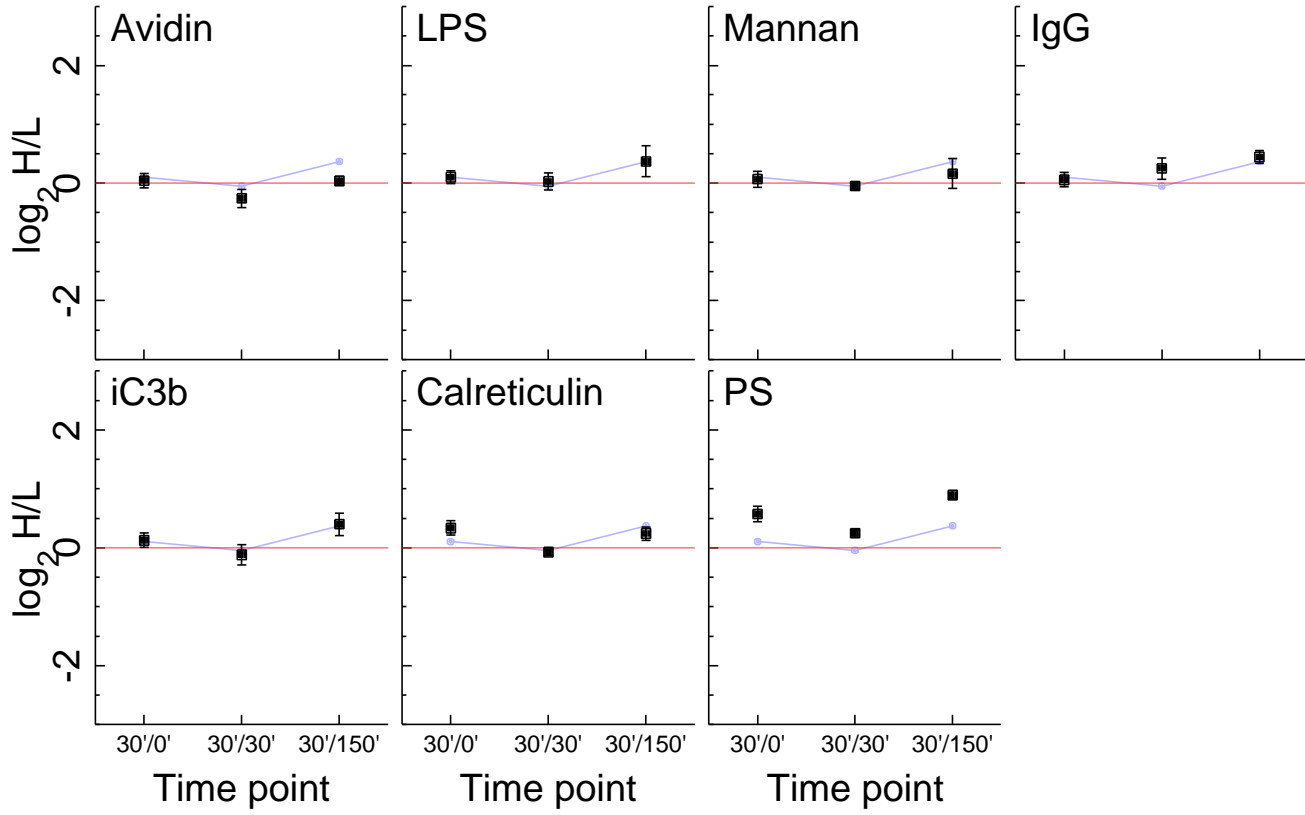

vta1 (Q9CR26)

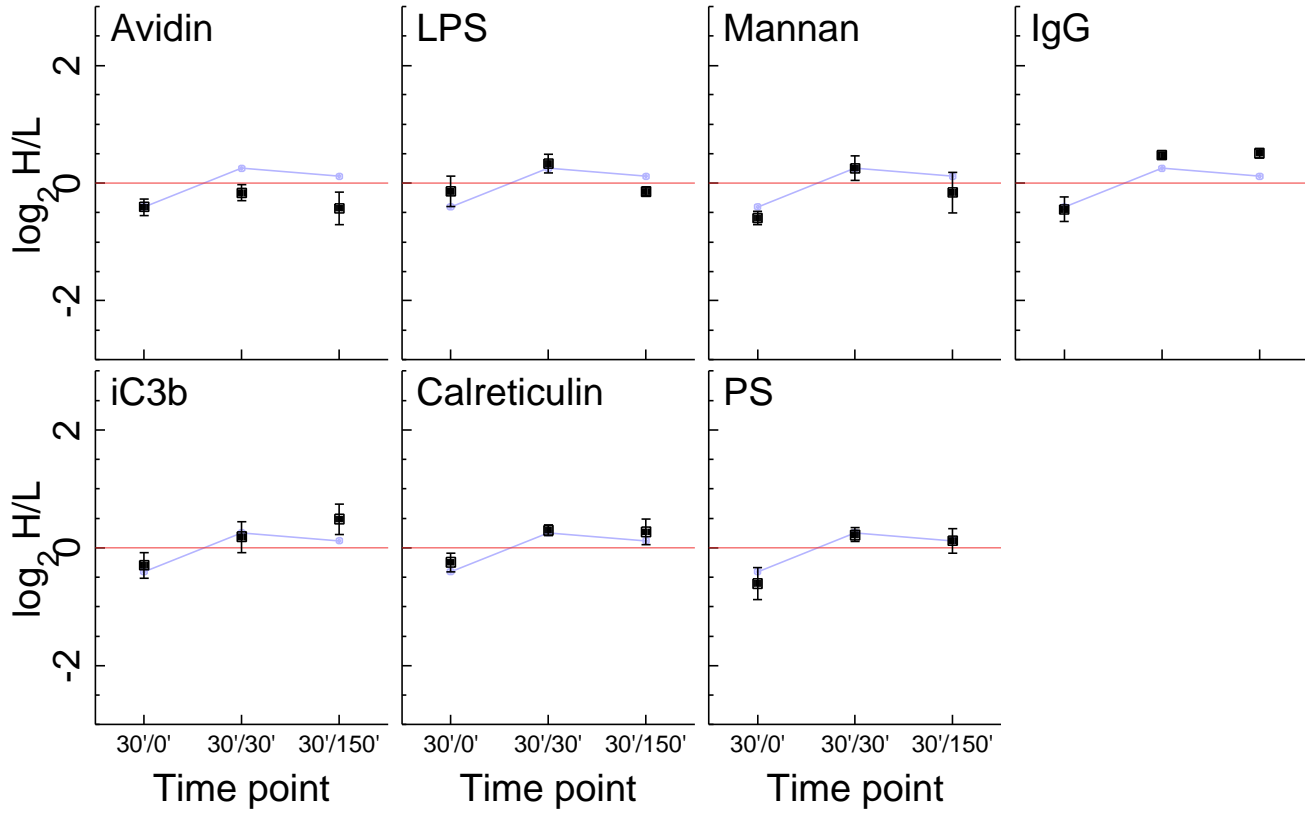



### vti1a (O89116)

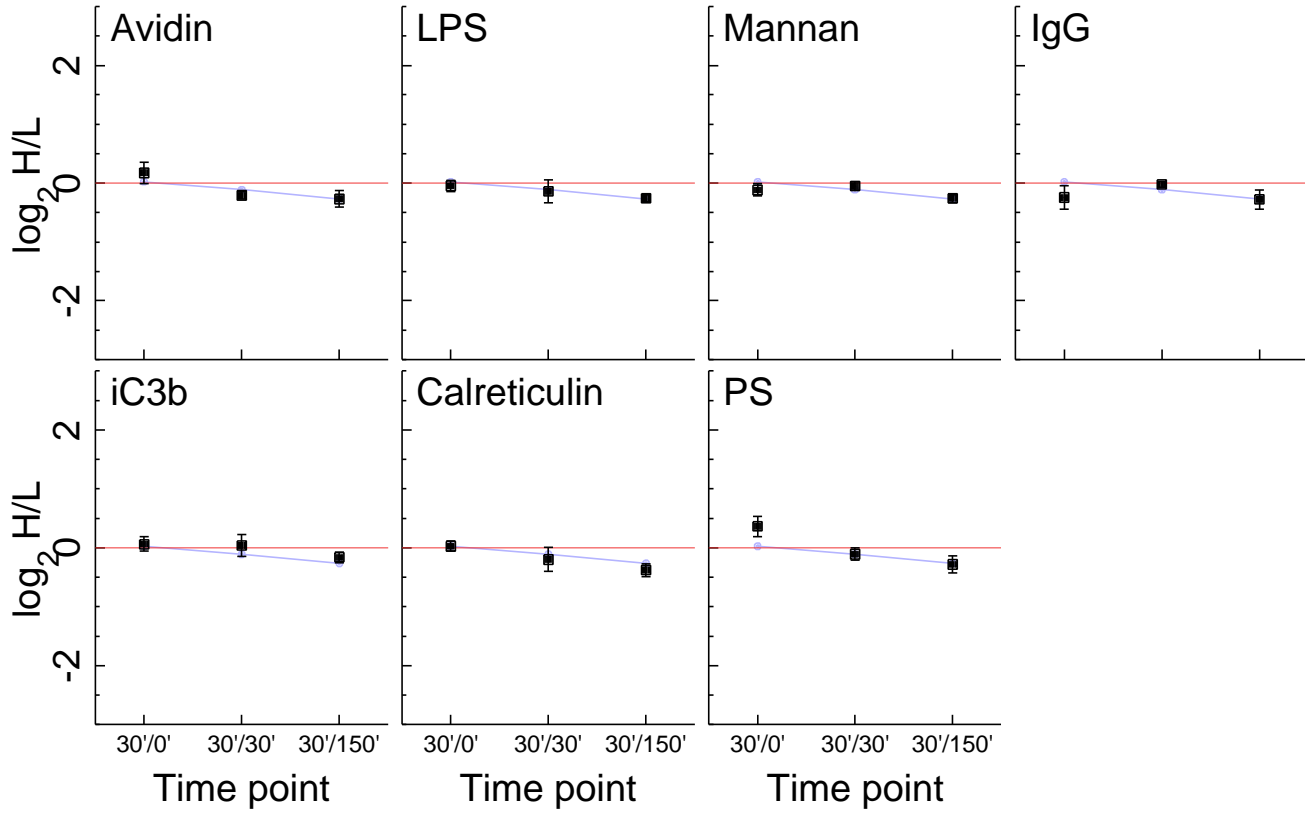

### vti1b (Q91XH6)

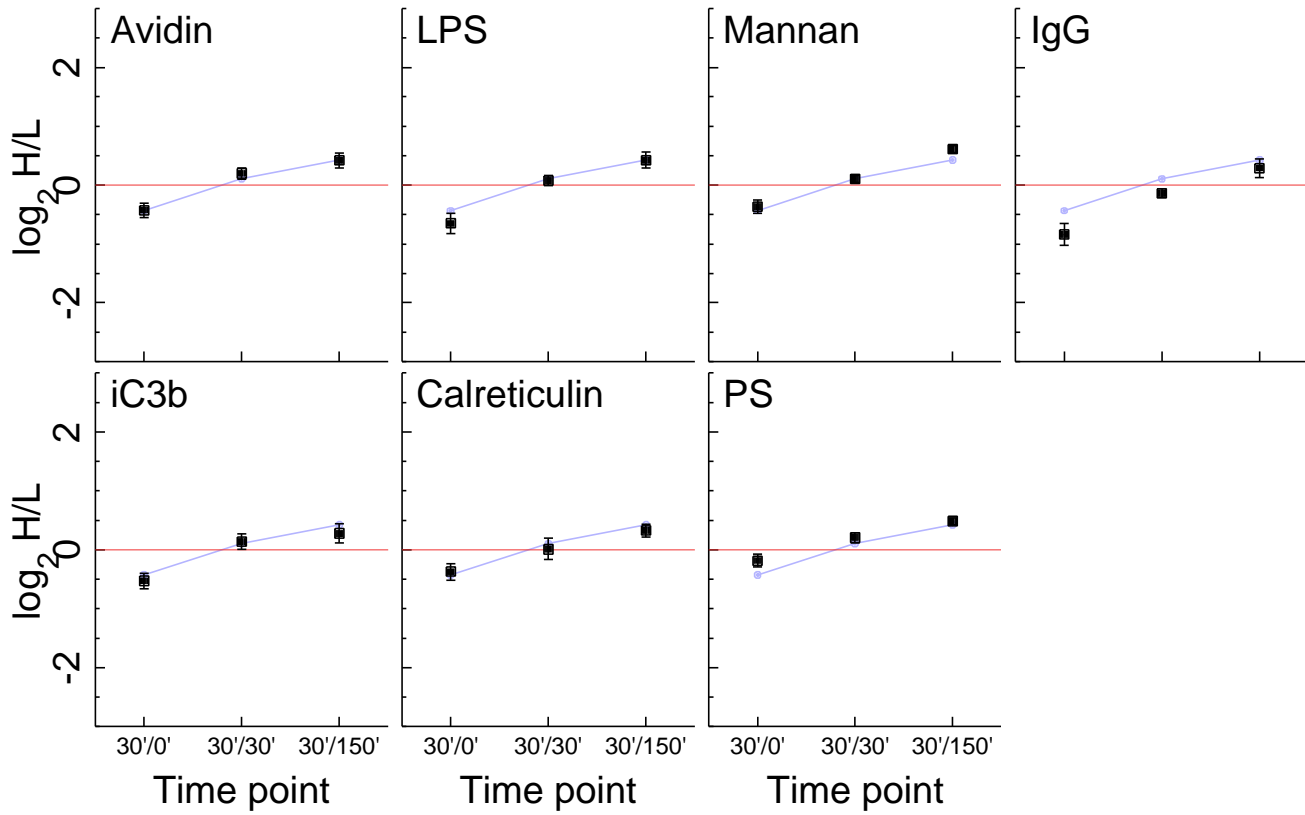

### vwa5a (Q99KC8)

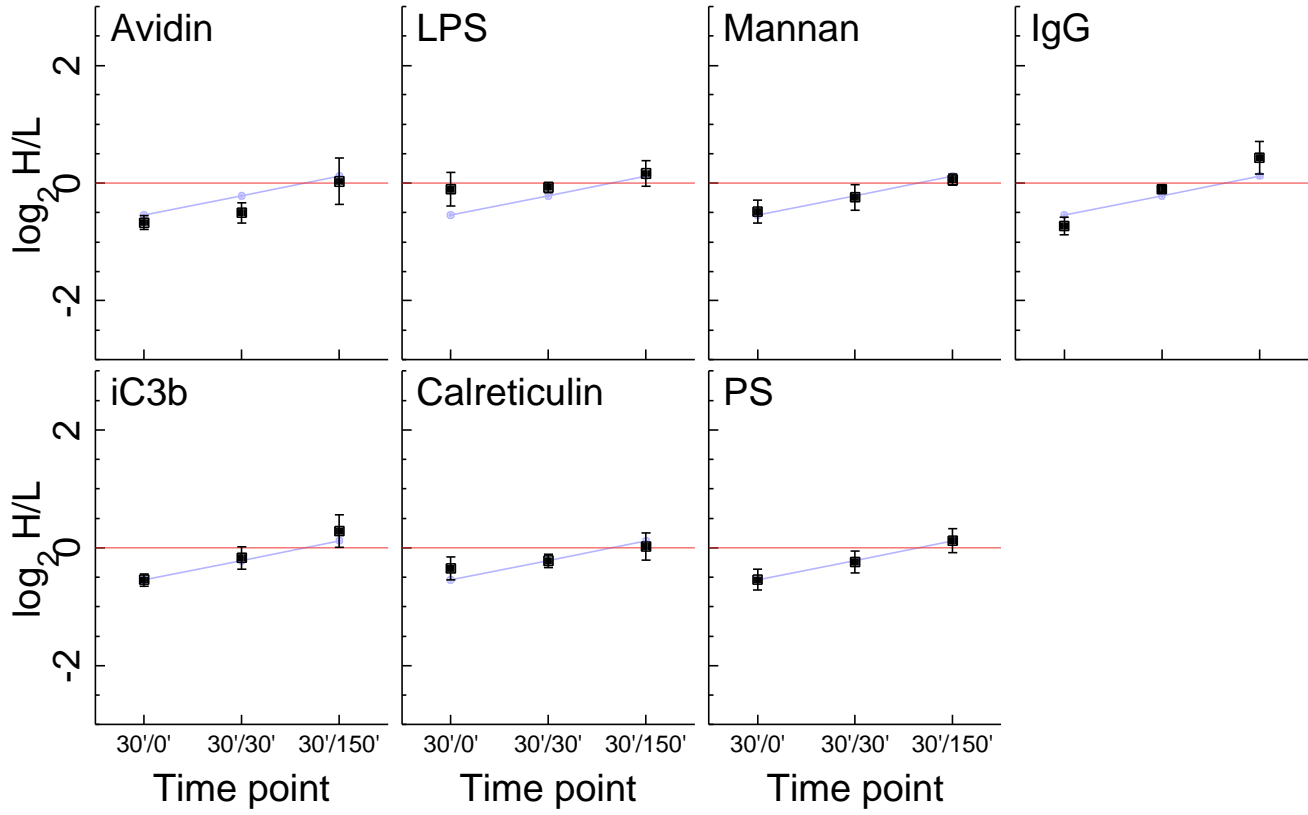

### wasf2 (Q8BH43)

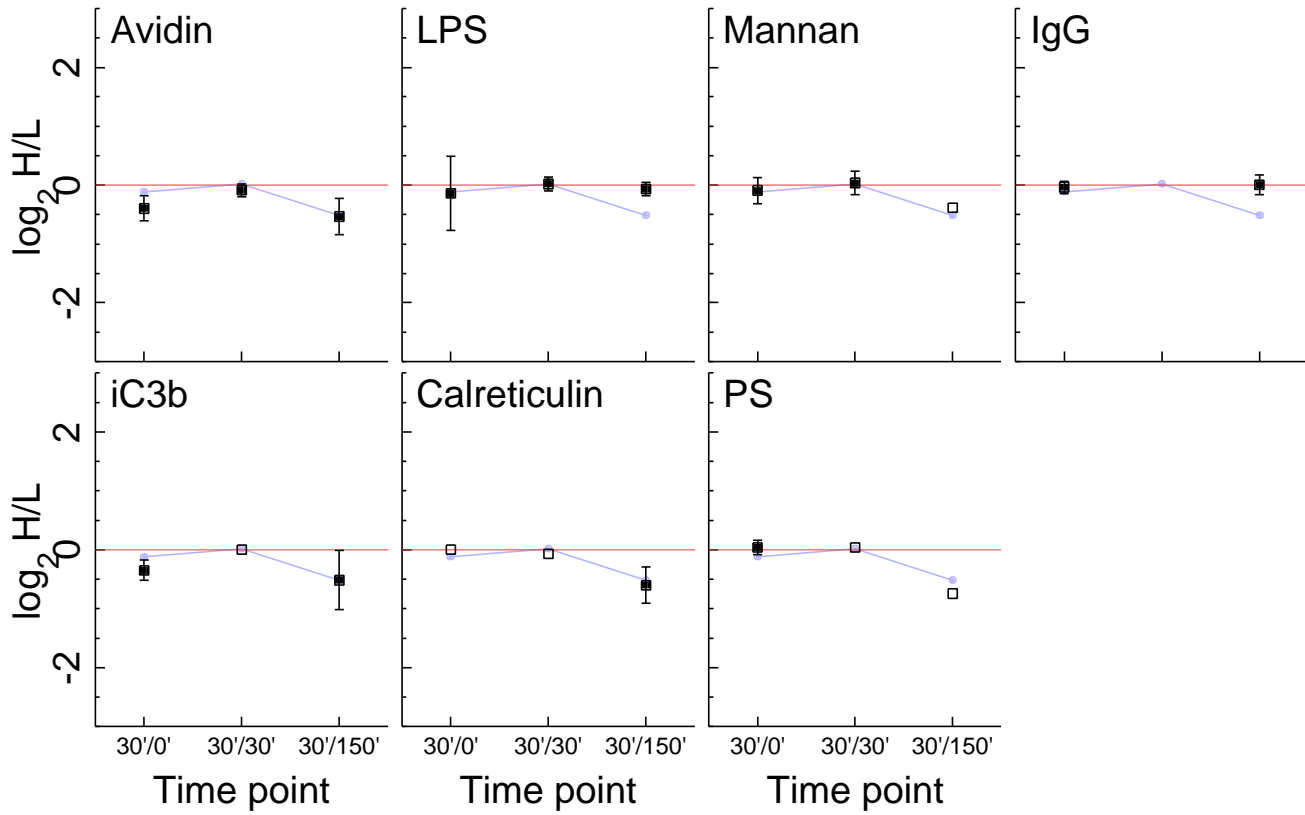

### wash1 (Q8VDD8)

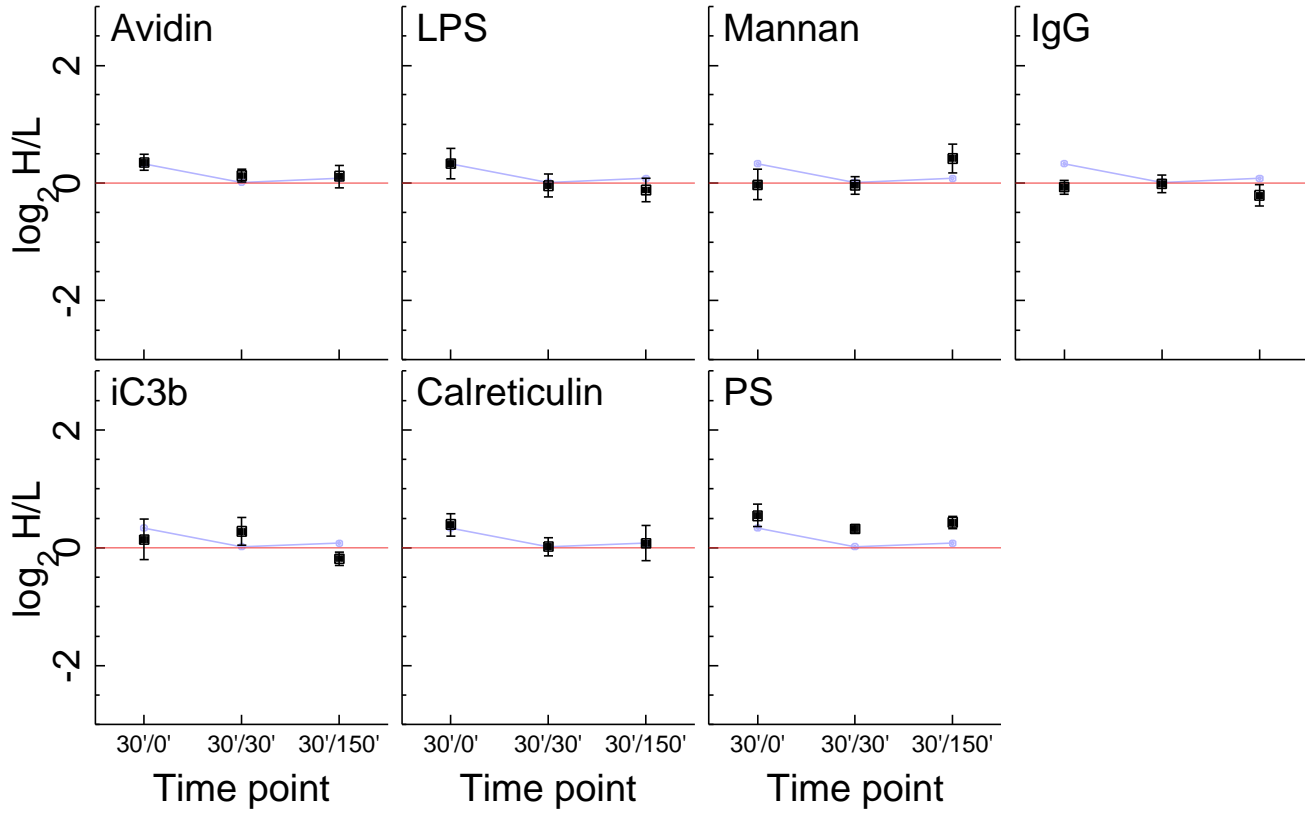

was (P70315)

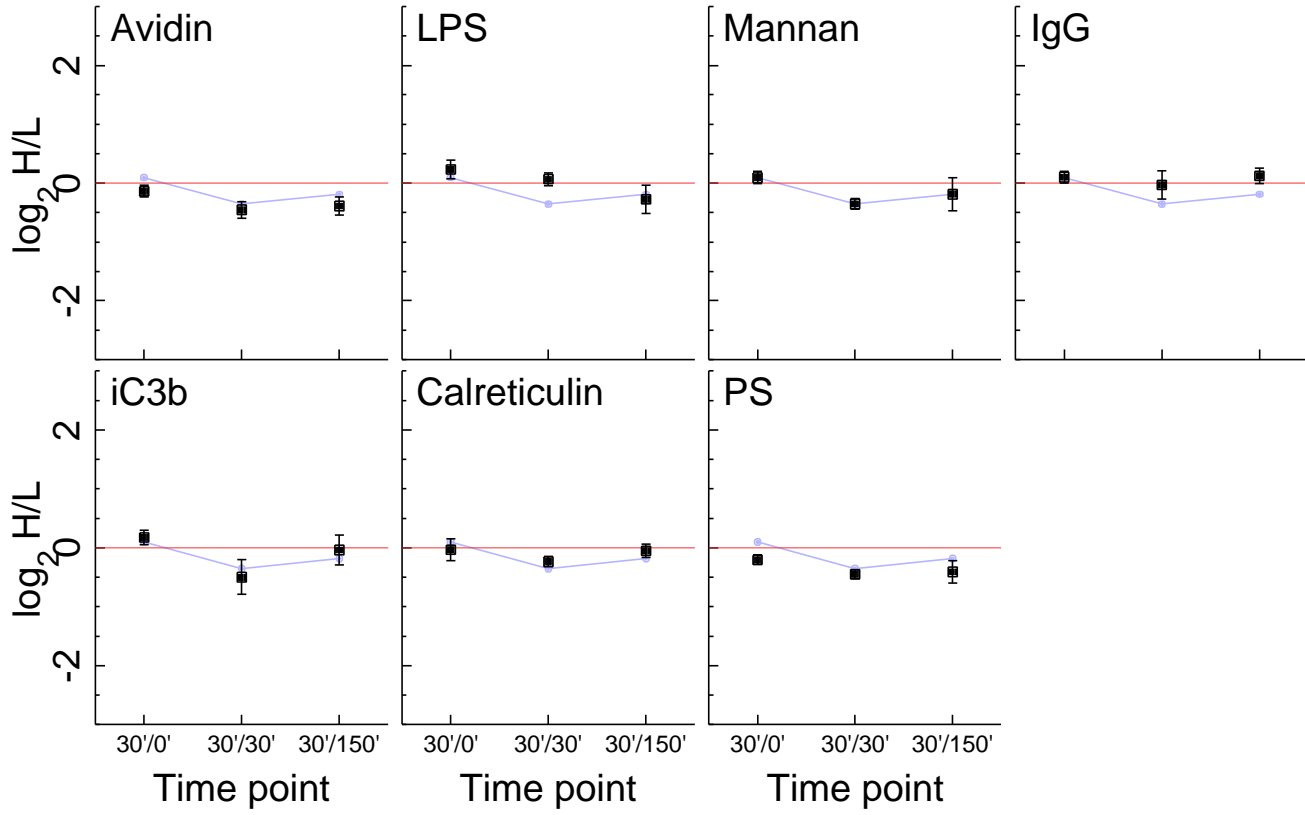

### wbp11 (Q923D5)

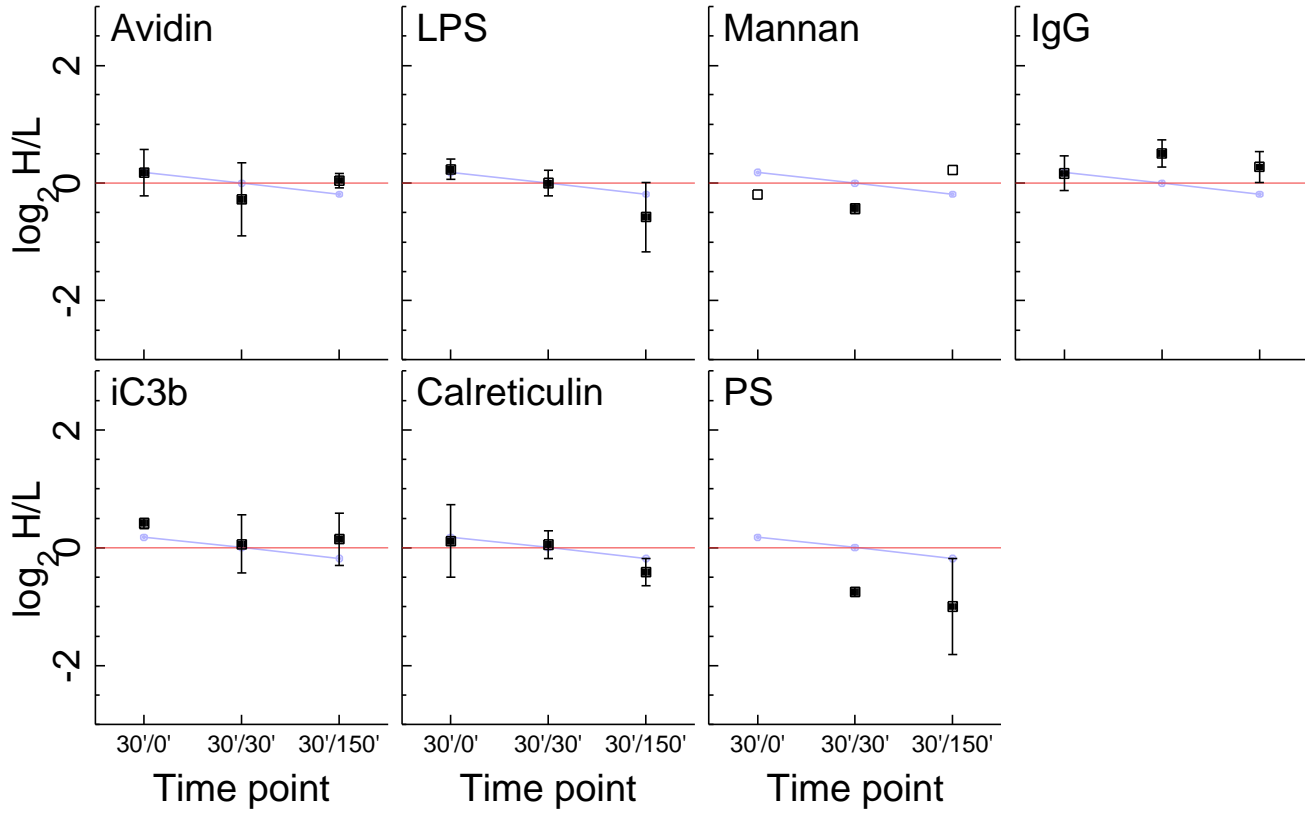

wdfy2 (Q8BUB4)

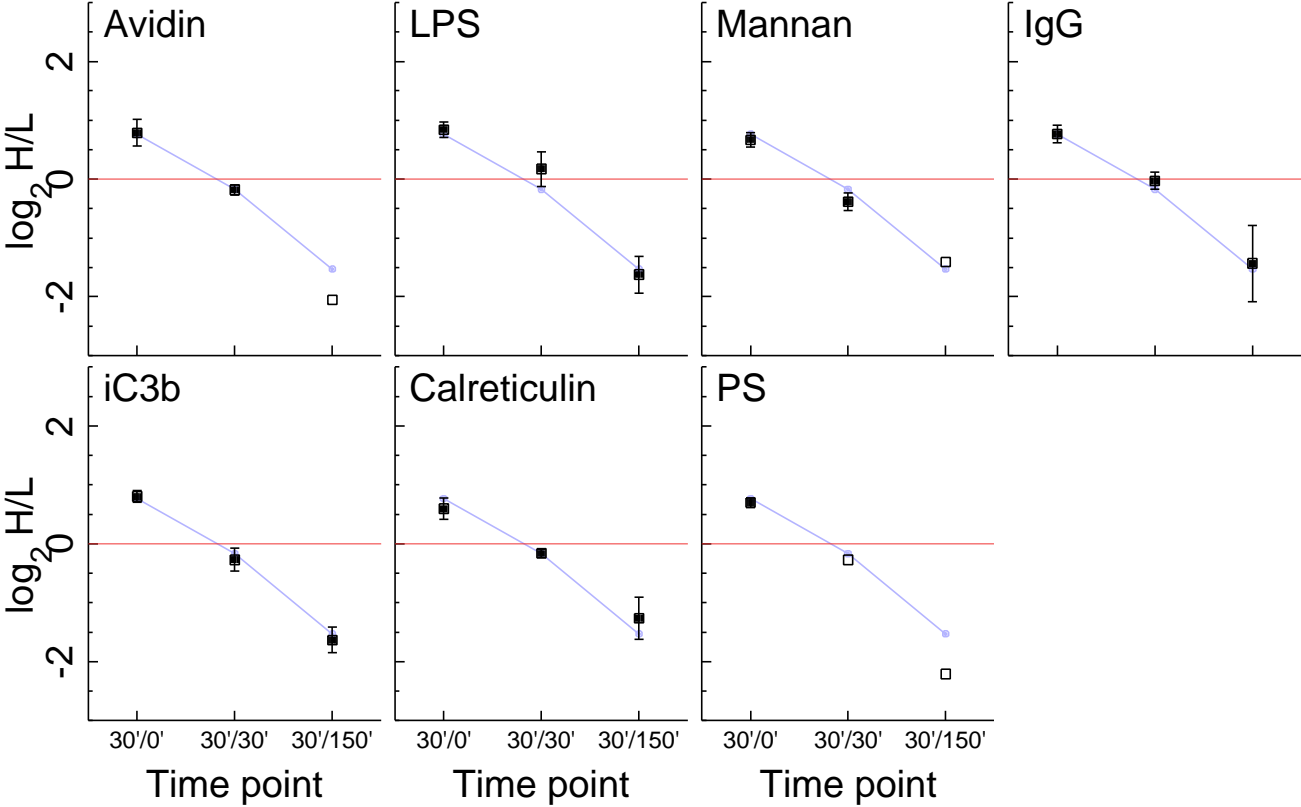



wdfy4 (E9Q2M9)

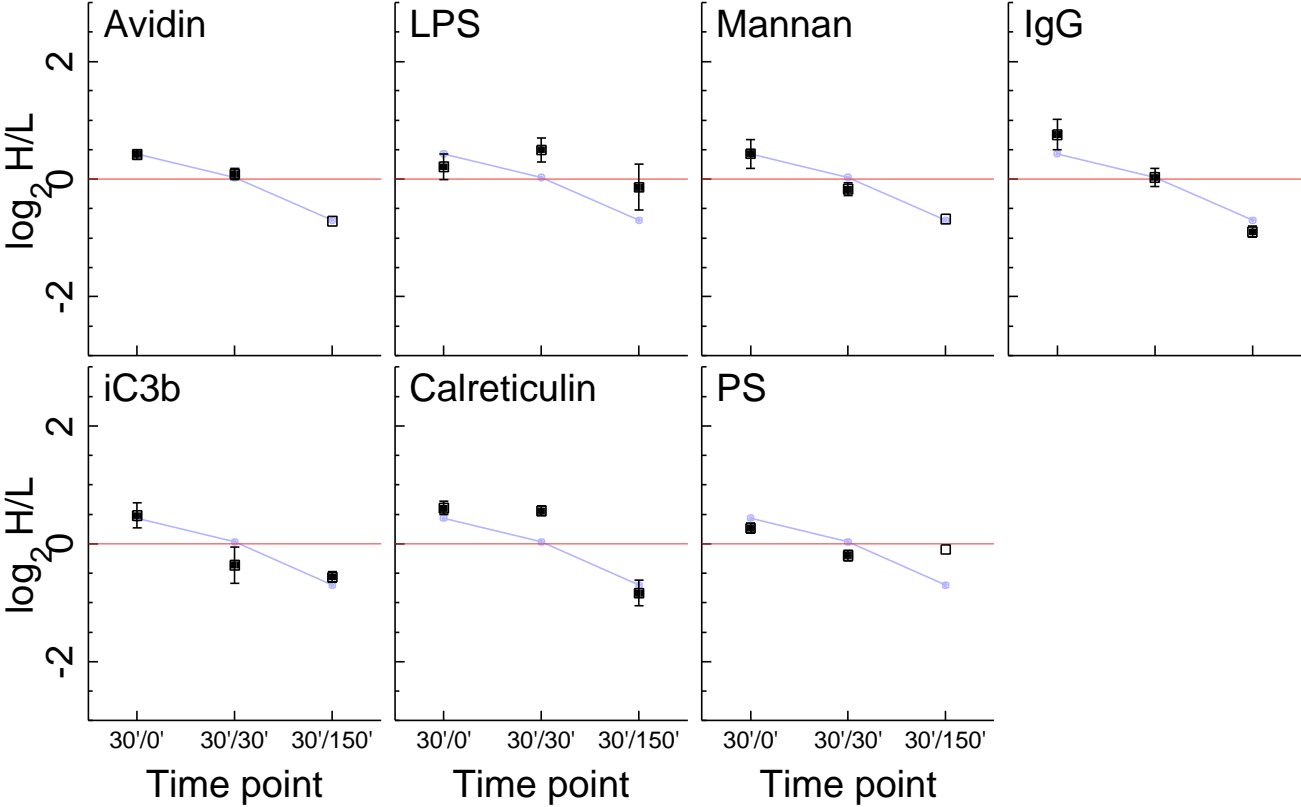

wdr1 (O88342)

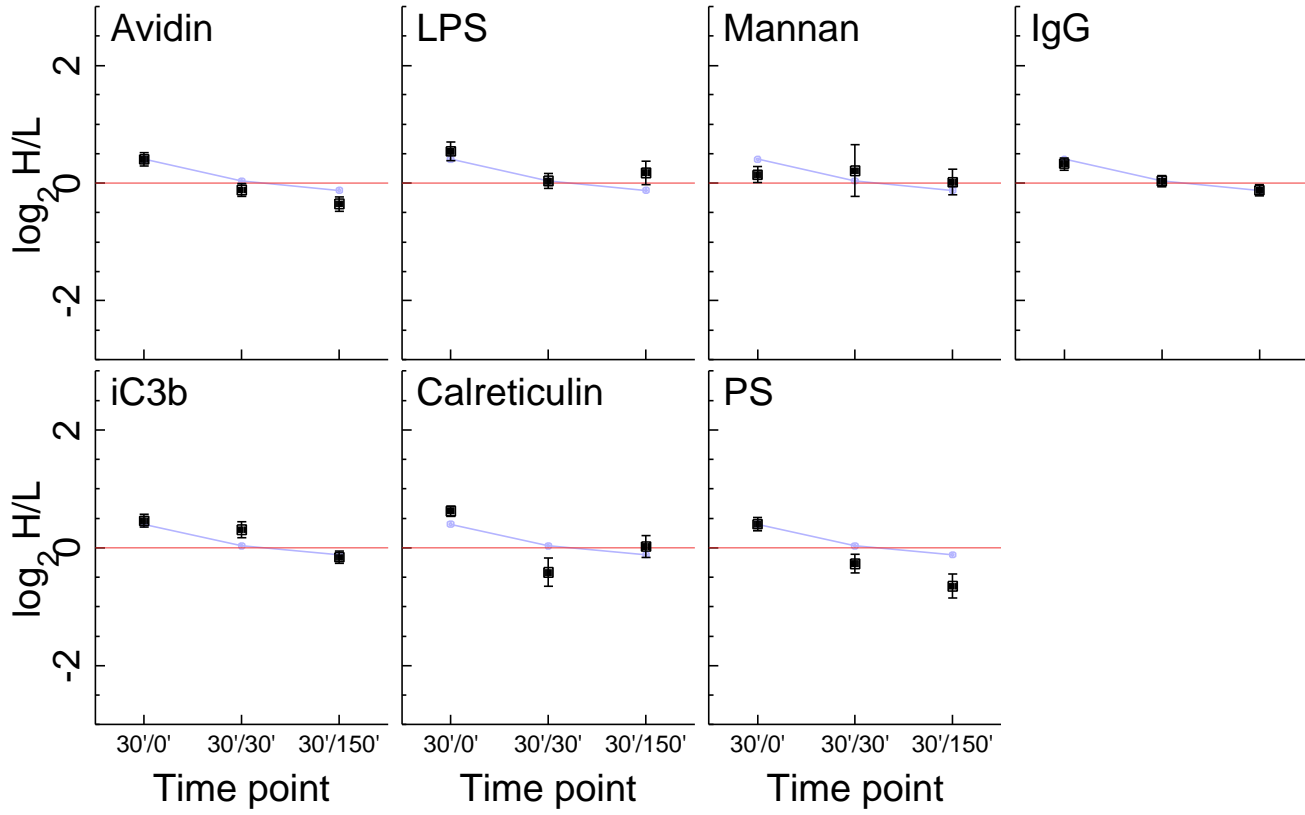

### wdr41 (Q3UDP0)

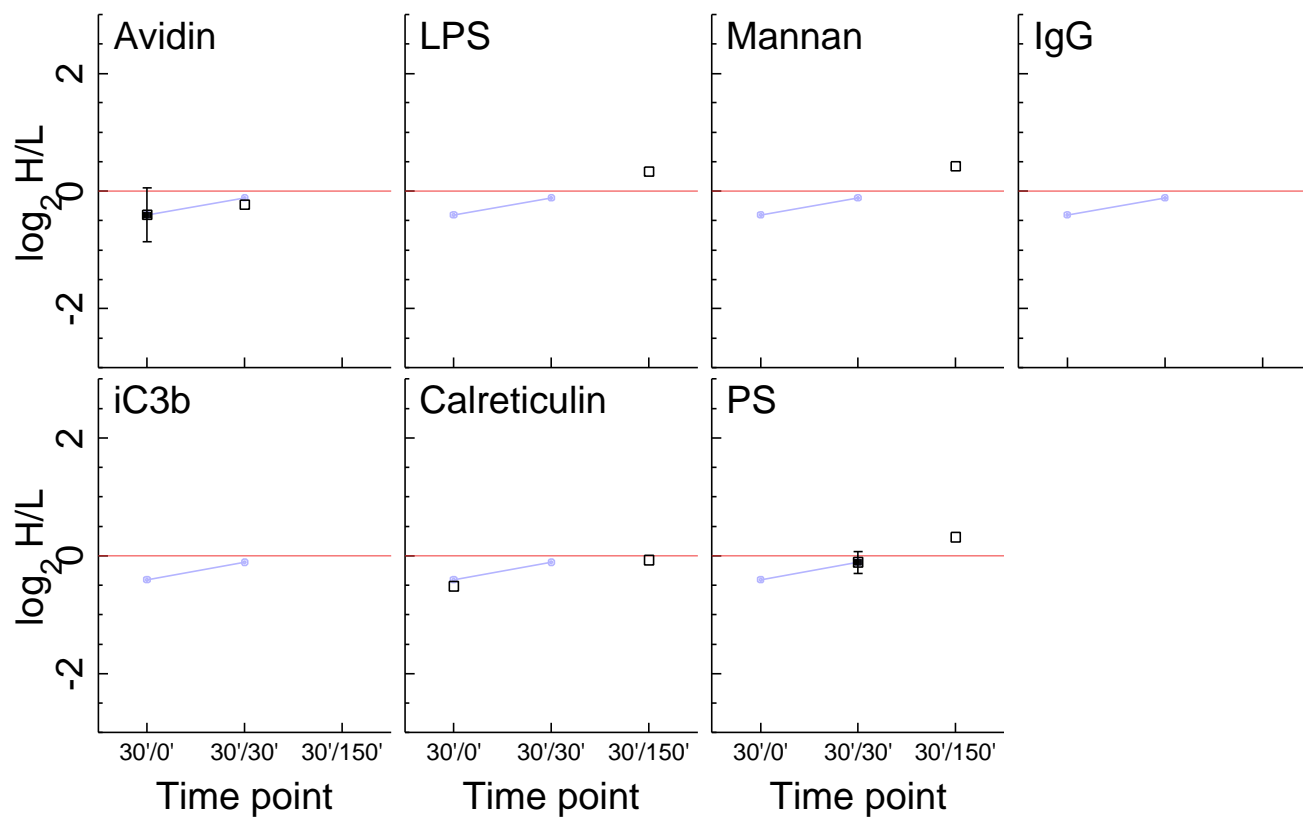

wdr45l (Q9CR39)

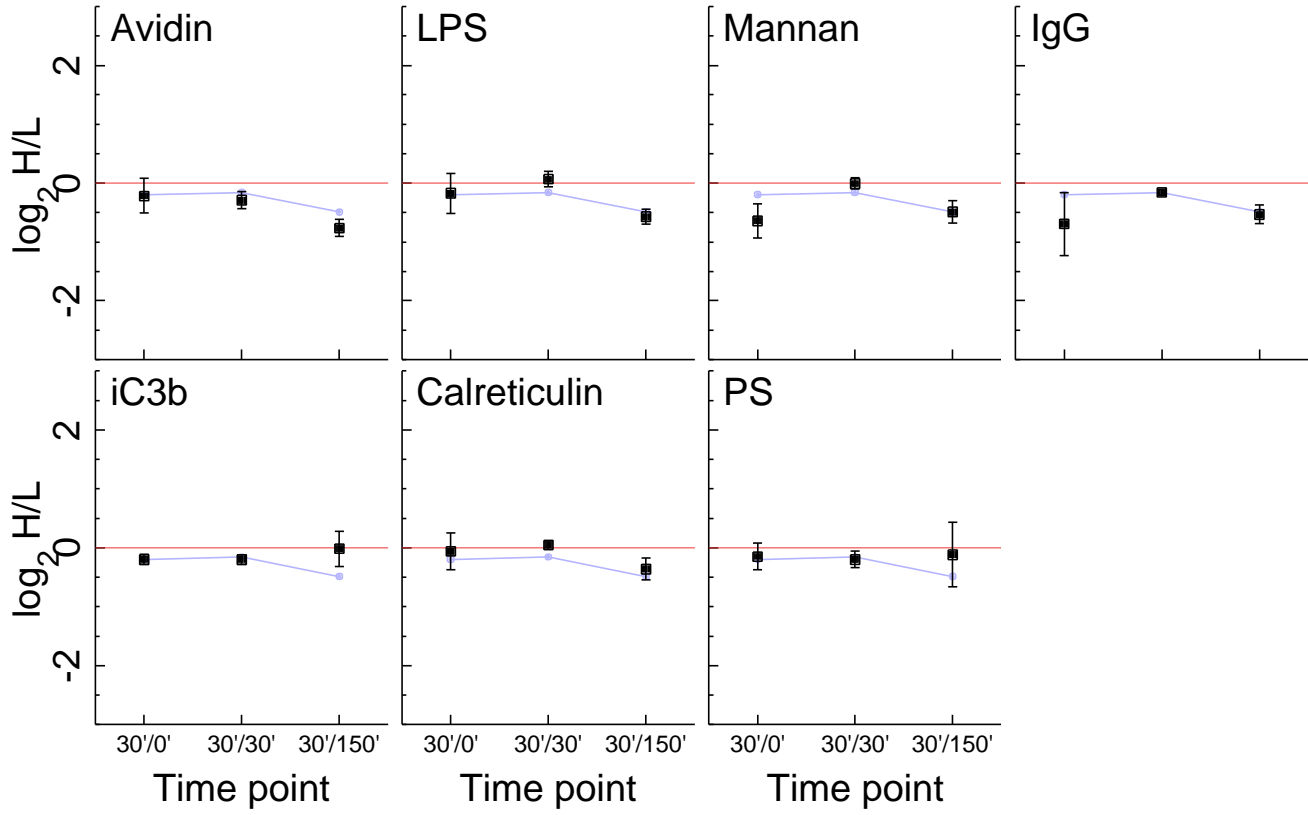

wdr5 (P61965)

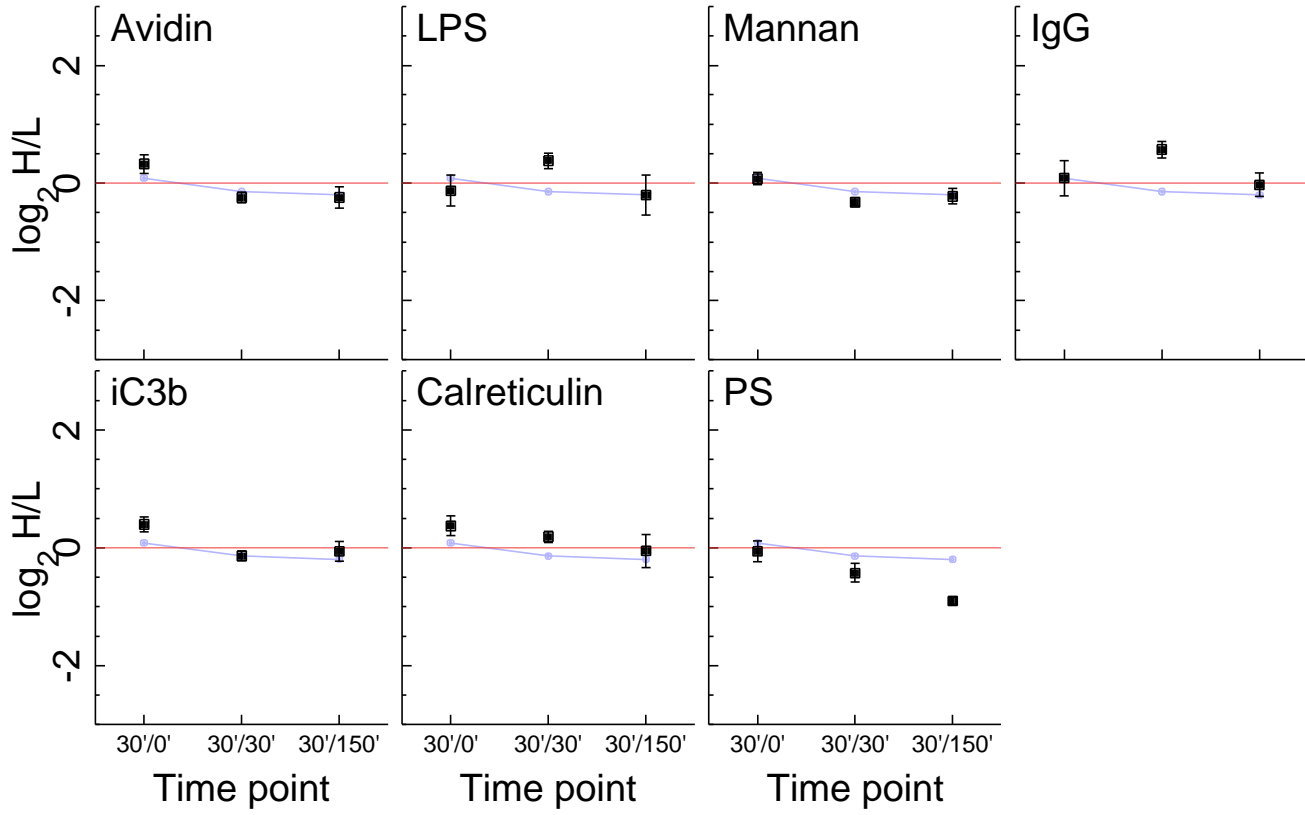

wdr70 (G3X934)

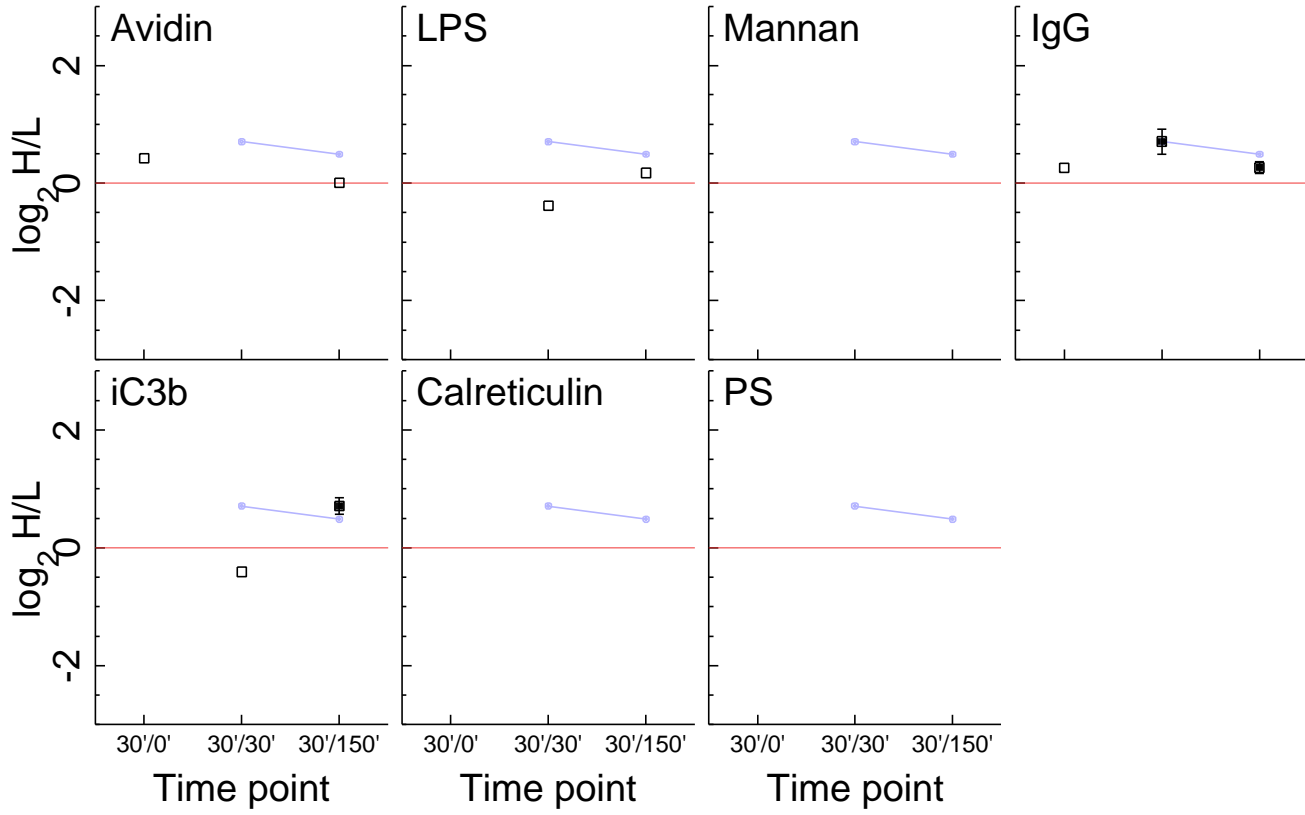

wdr7 (Q92019)

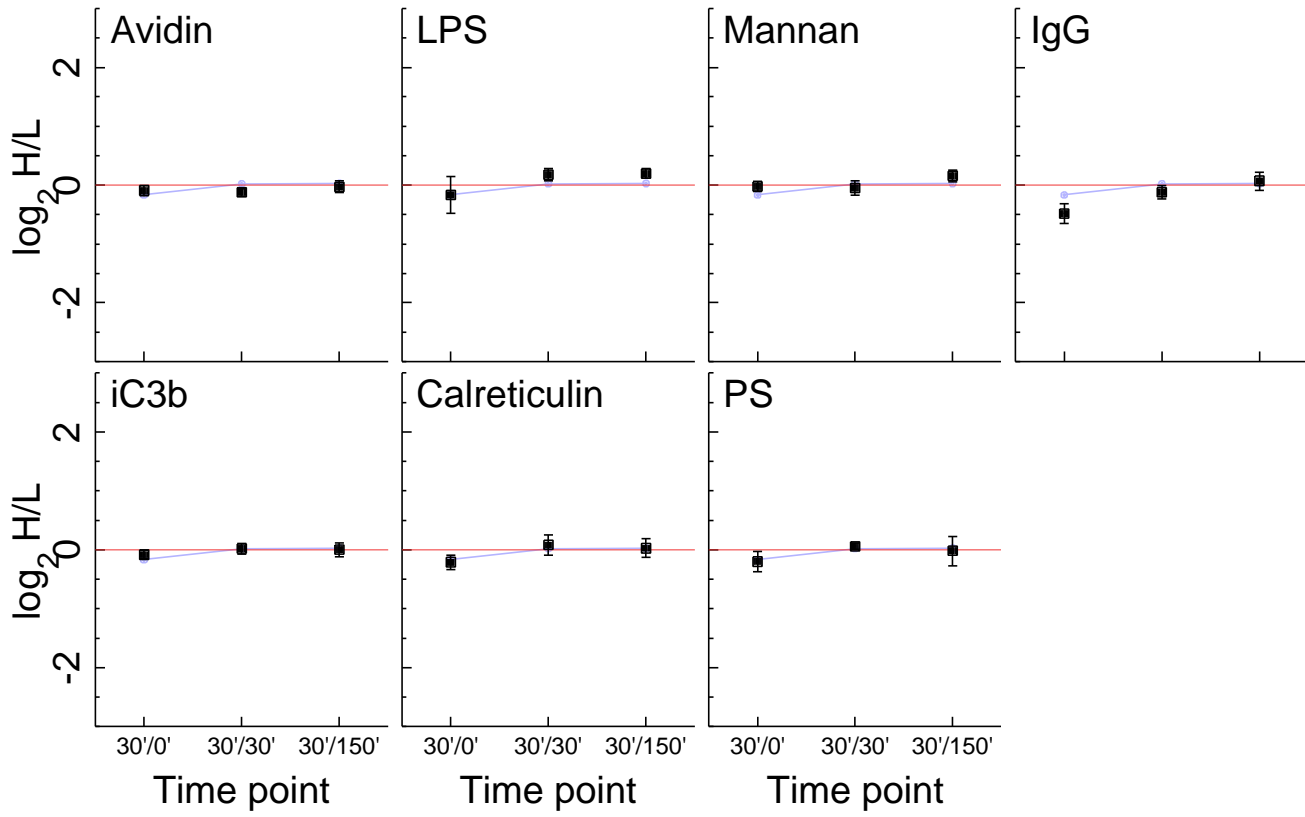

wdr81 (Q5ND34)

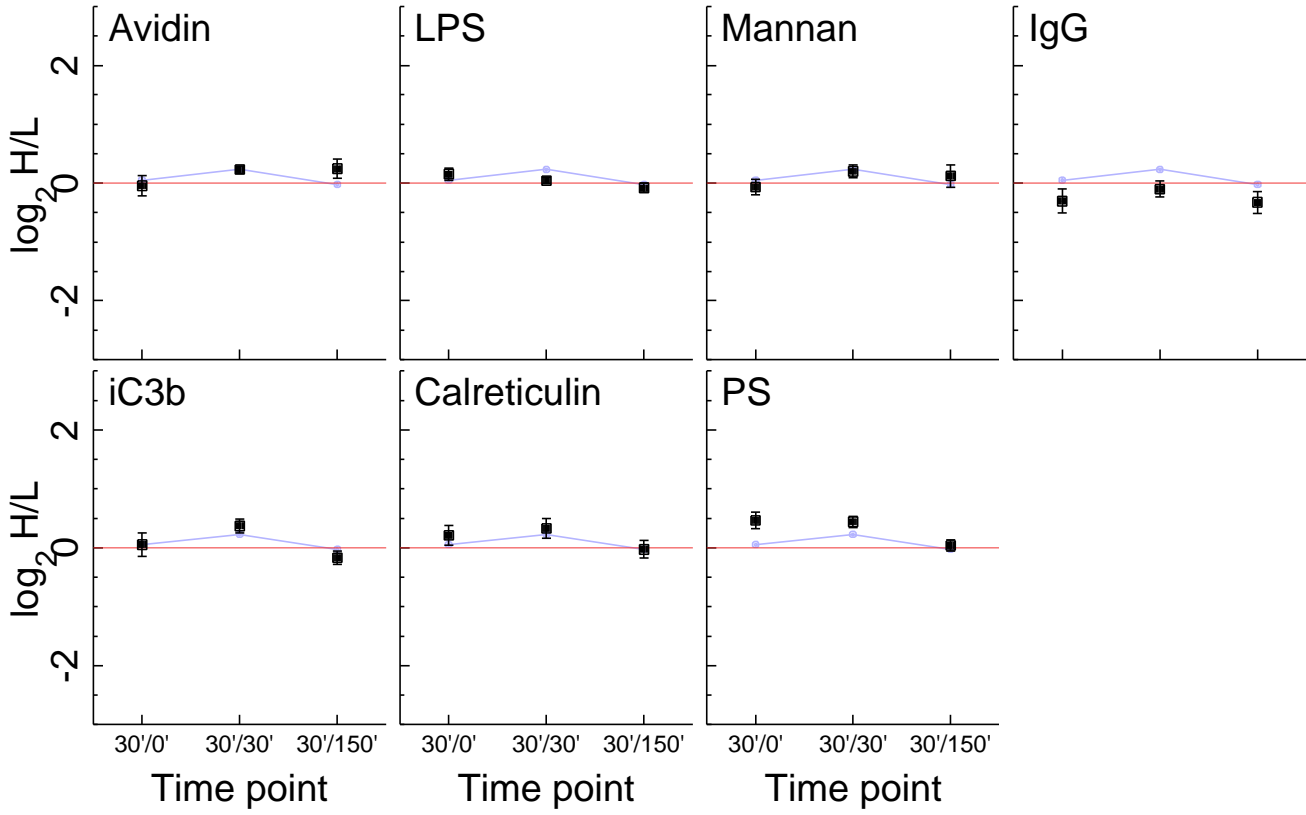



wdr91 (Q7TMQ7)

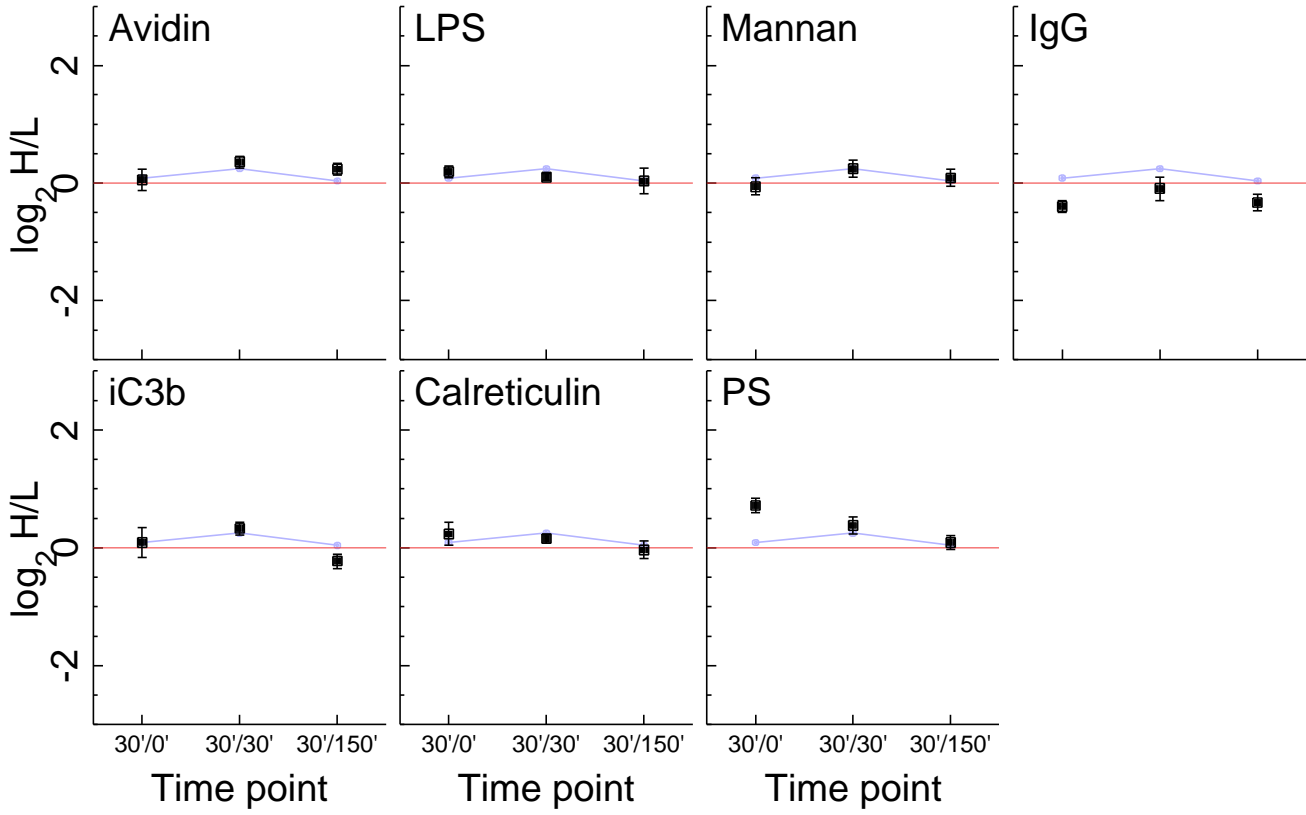

### wipf1 (Q8K1I7)

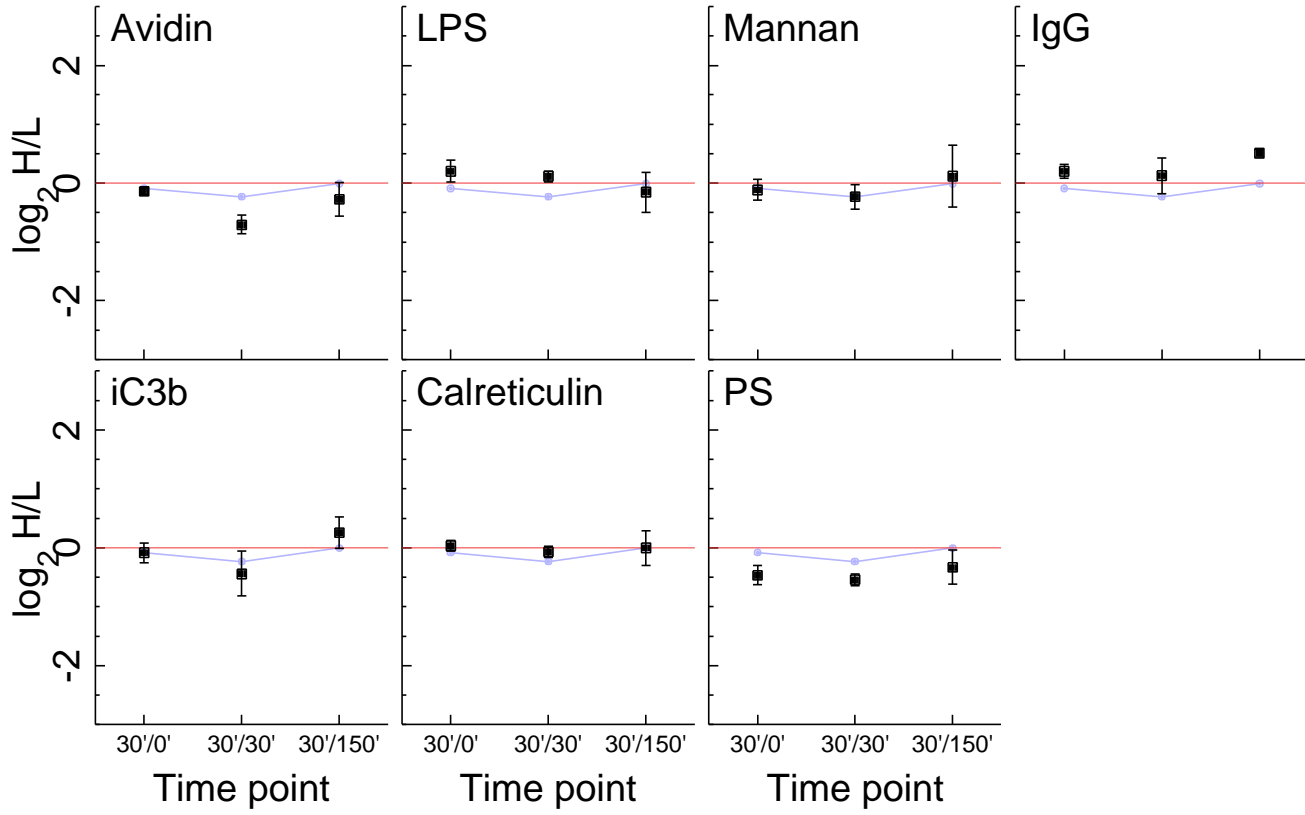

wnk1 (P83741)

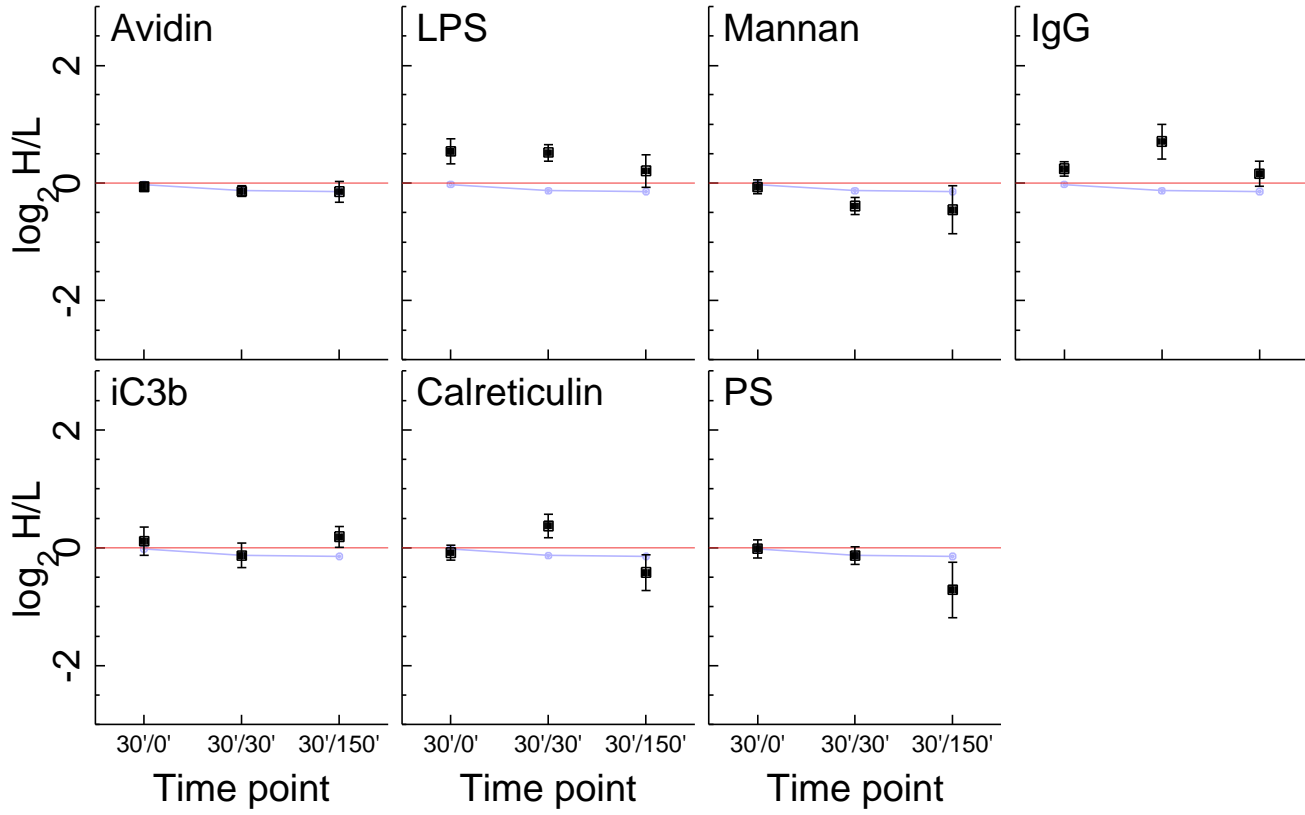

### wwp1 (Q8BZZ3)

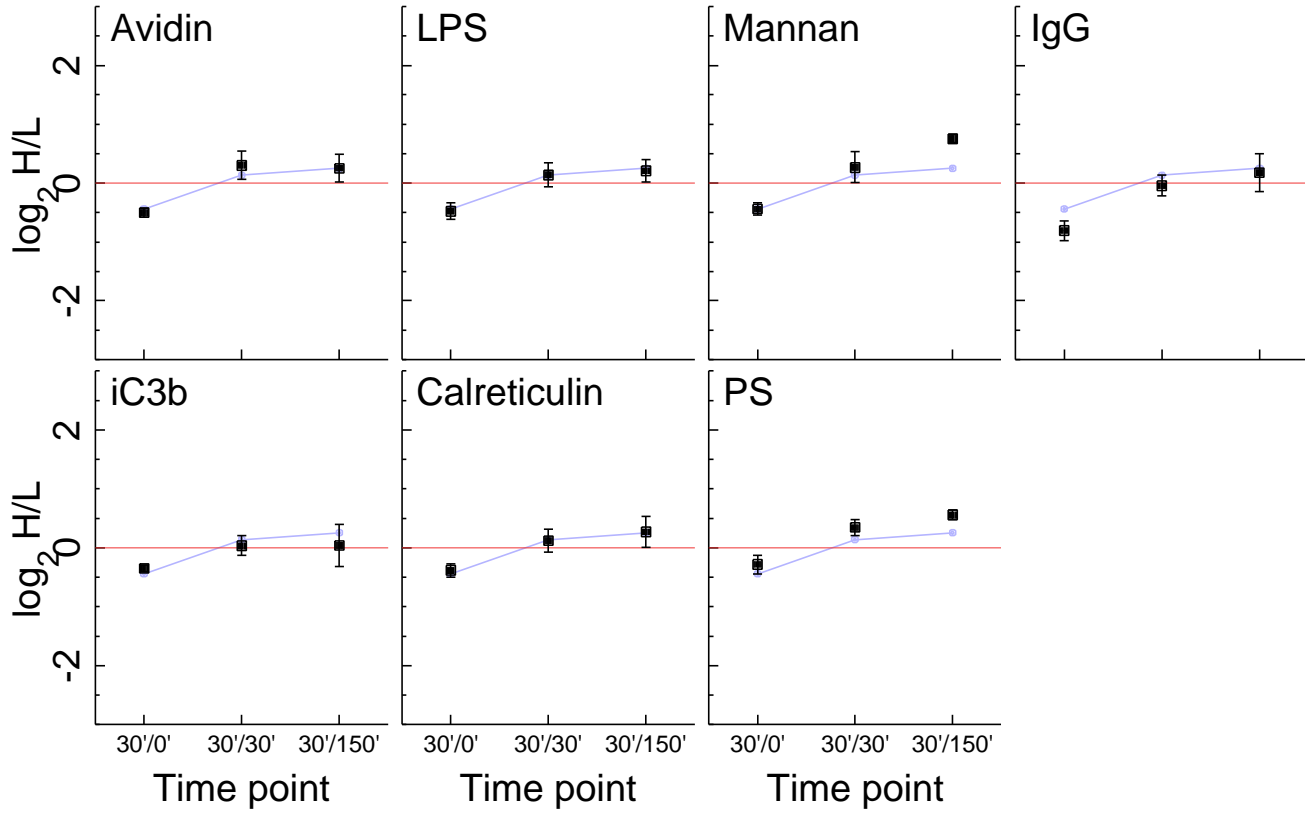

wwp2 (Q9DBH0)

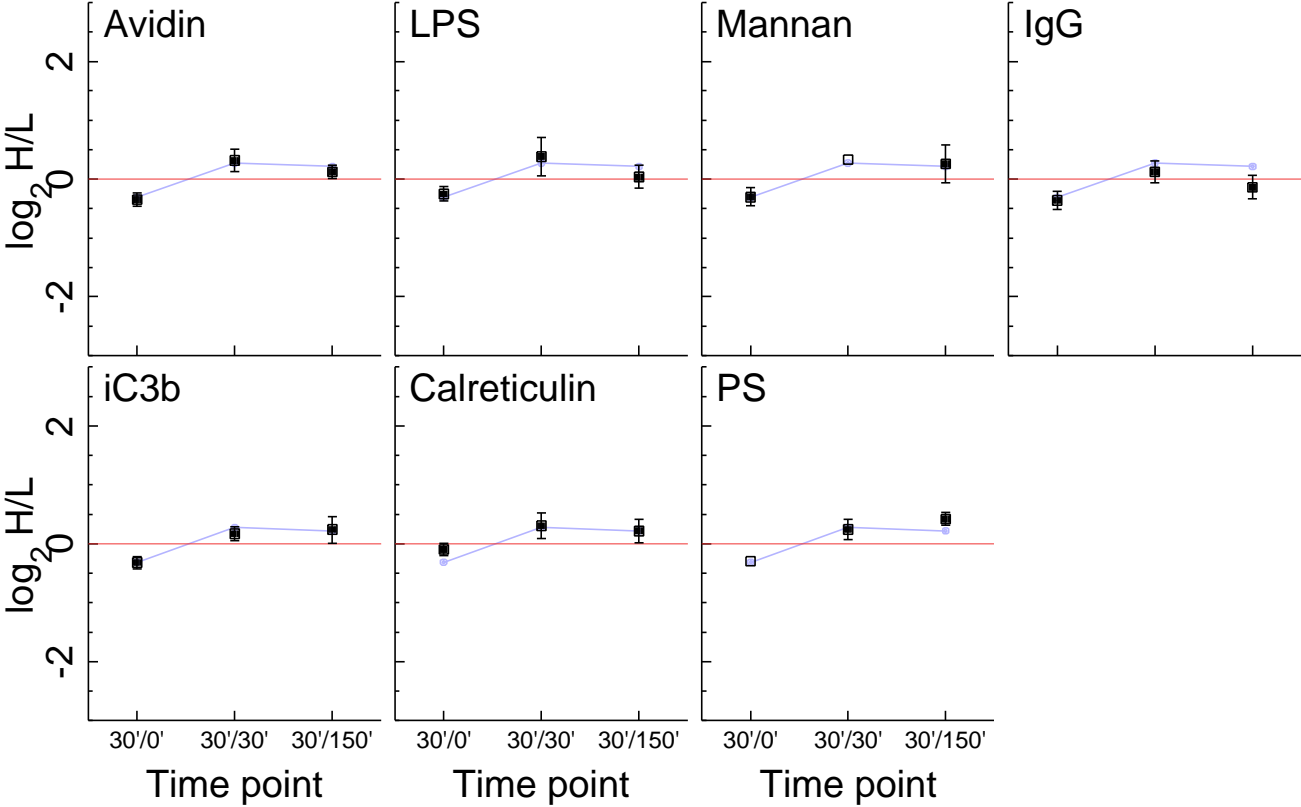

### xaf1 (Q5NBU8)

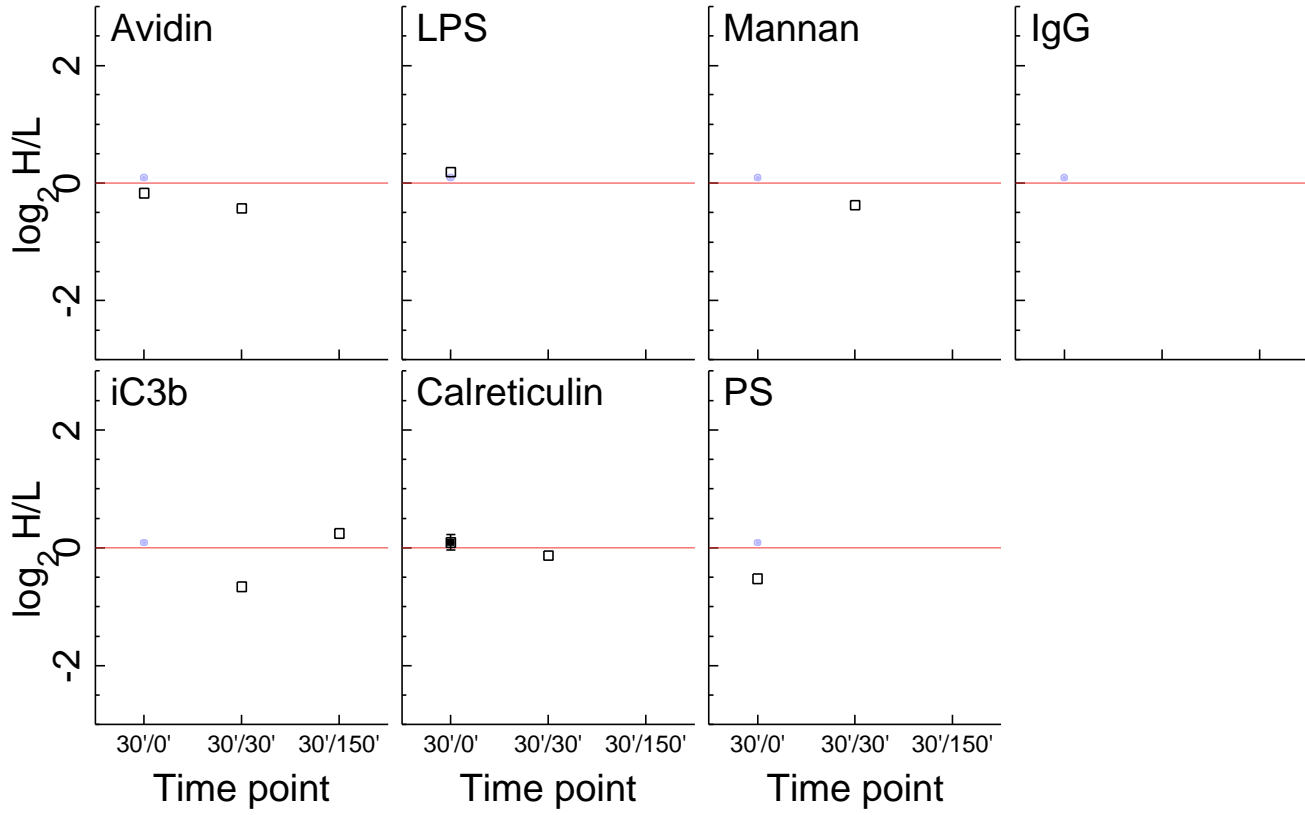

### yipf3 (Q3UDR8)

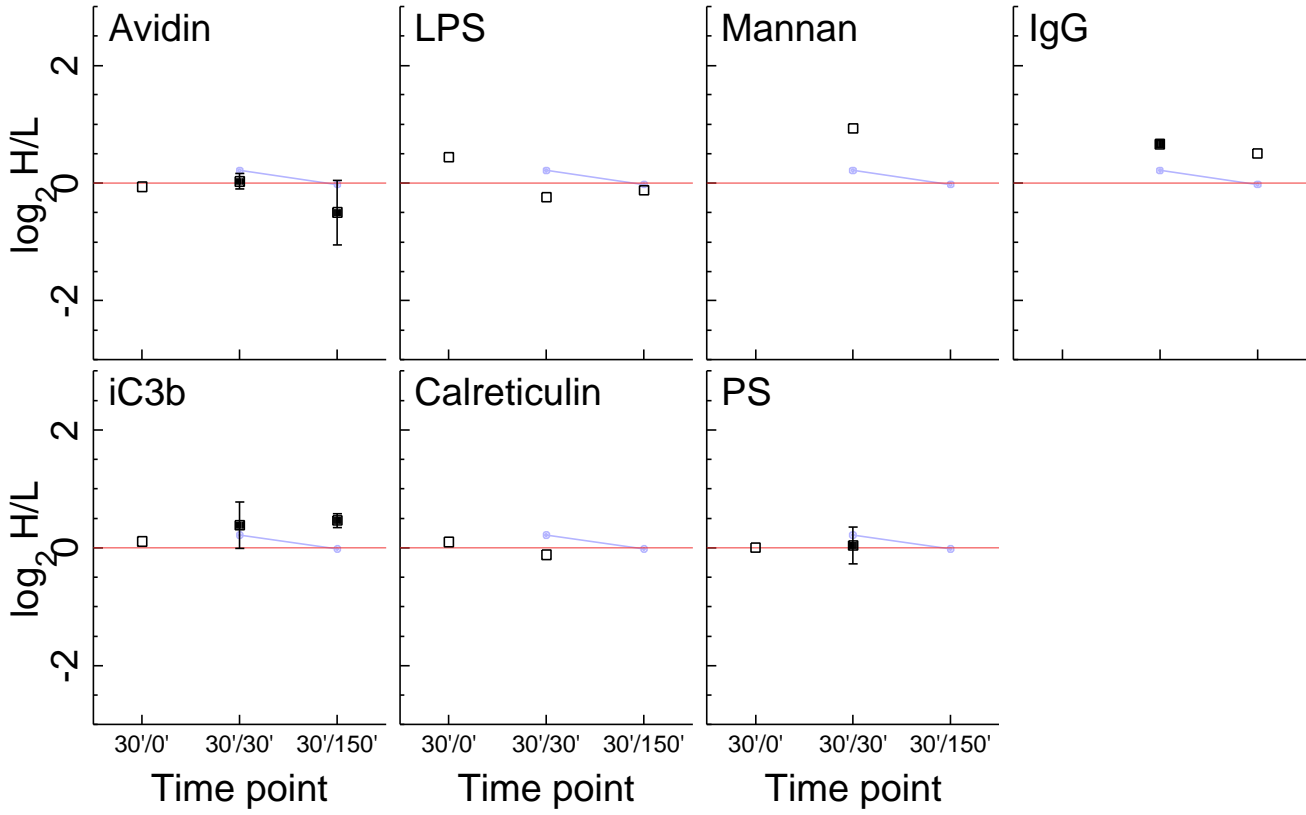

ykt6 (Q9CQW1)

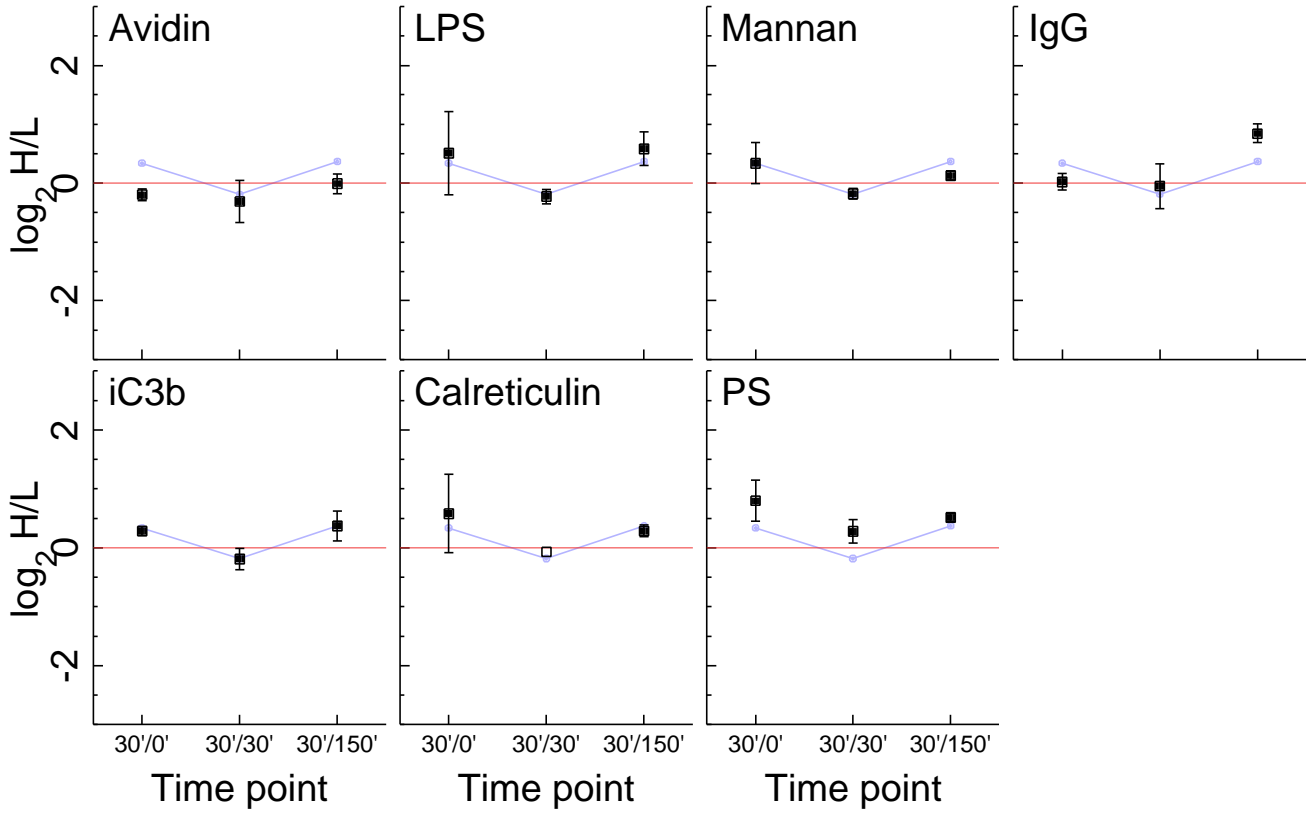



ythdf3 (Q8BYK6)

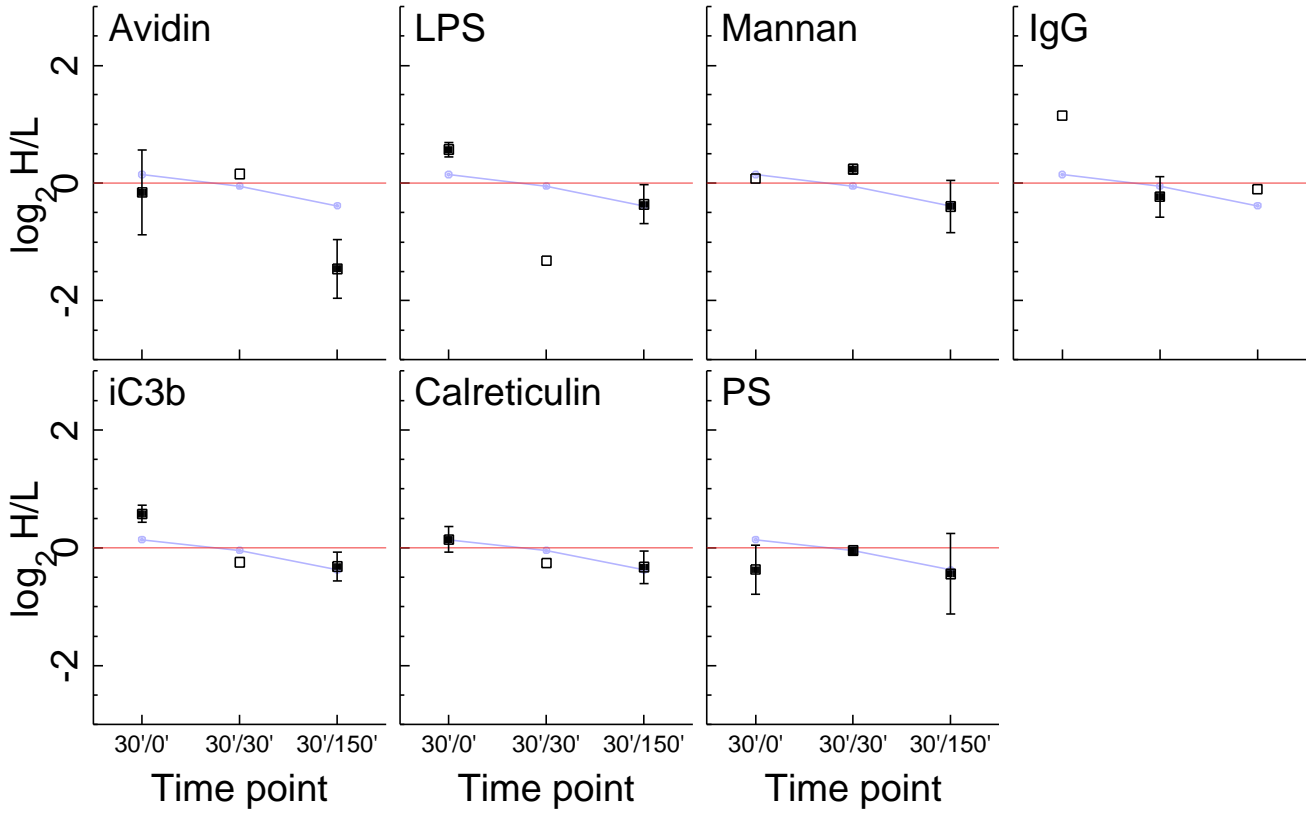

### ywhab (Q9CQV8)

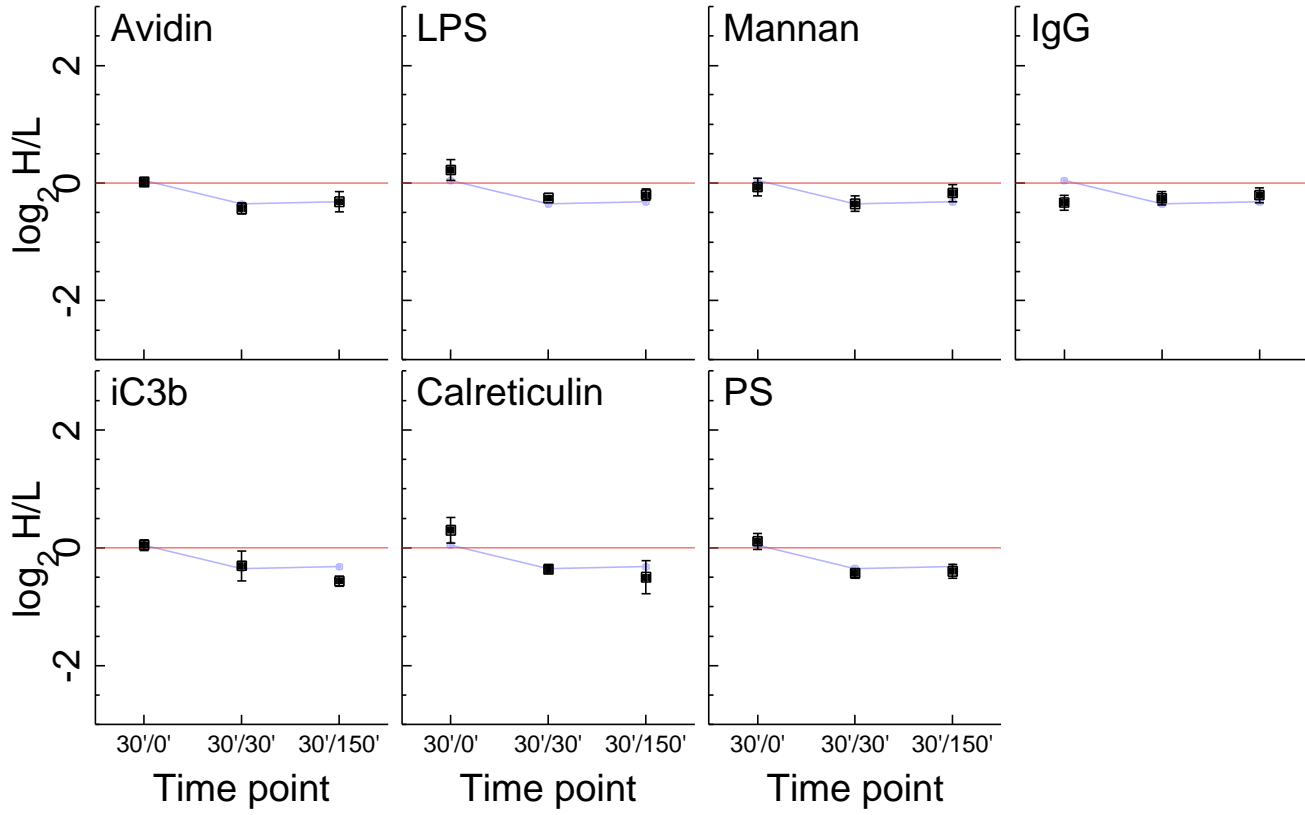

### ywhae (P62259)

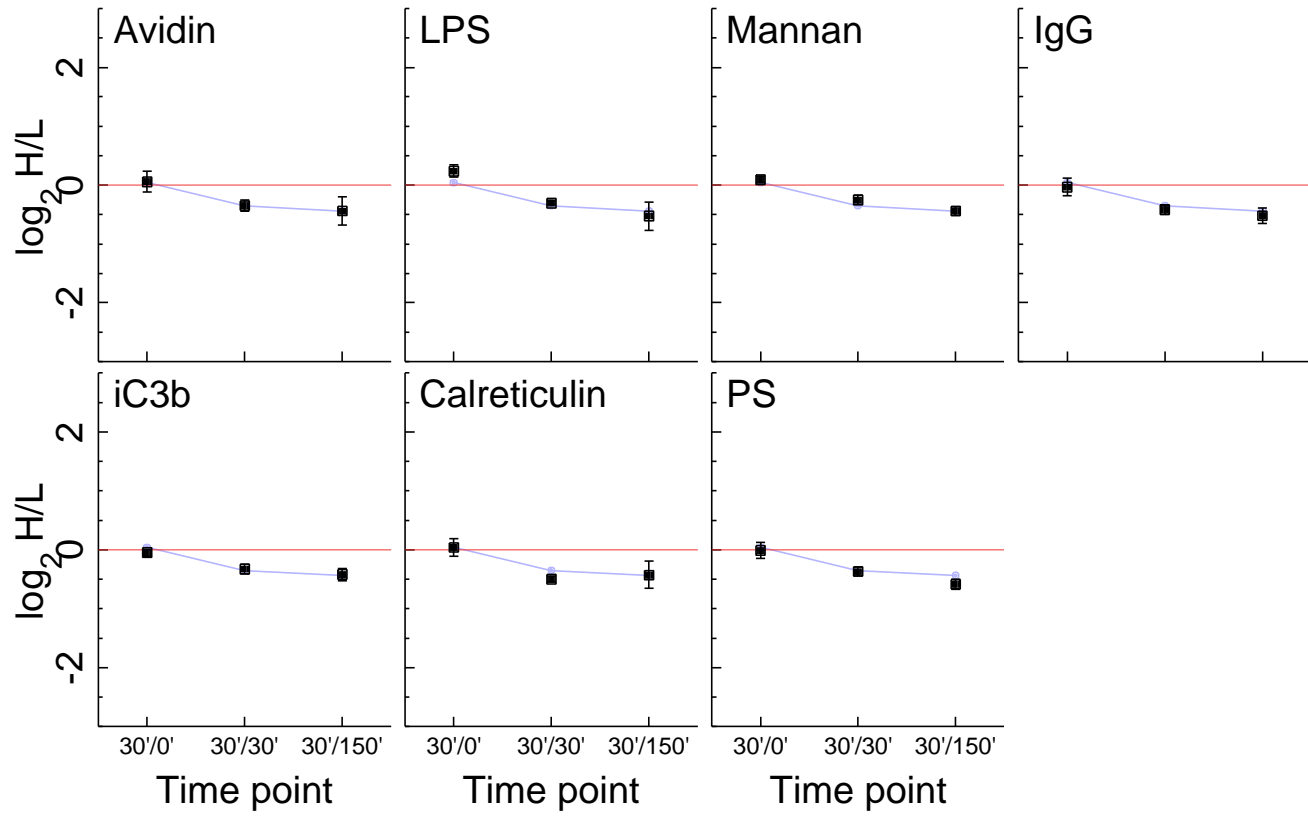

### ywhag (P61982)

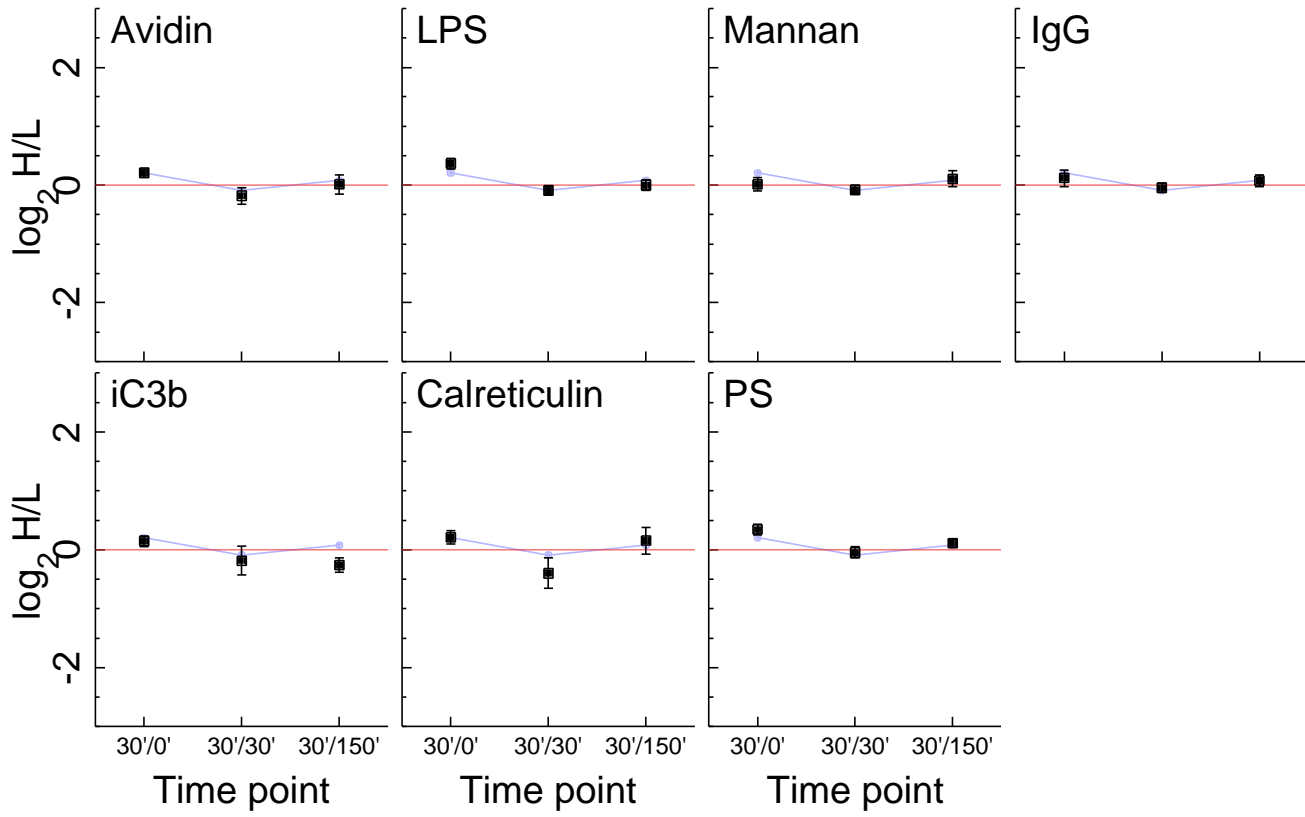

### ywhah (P68510)

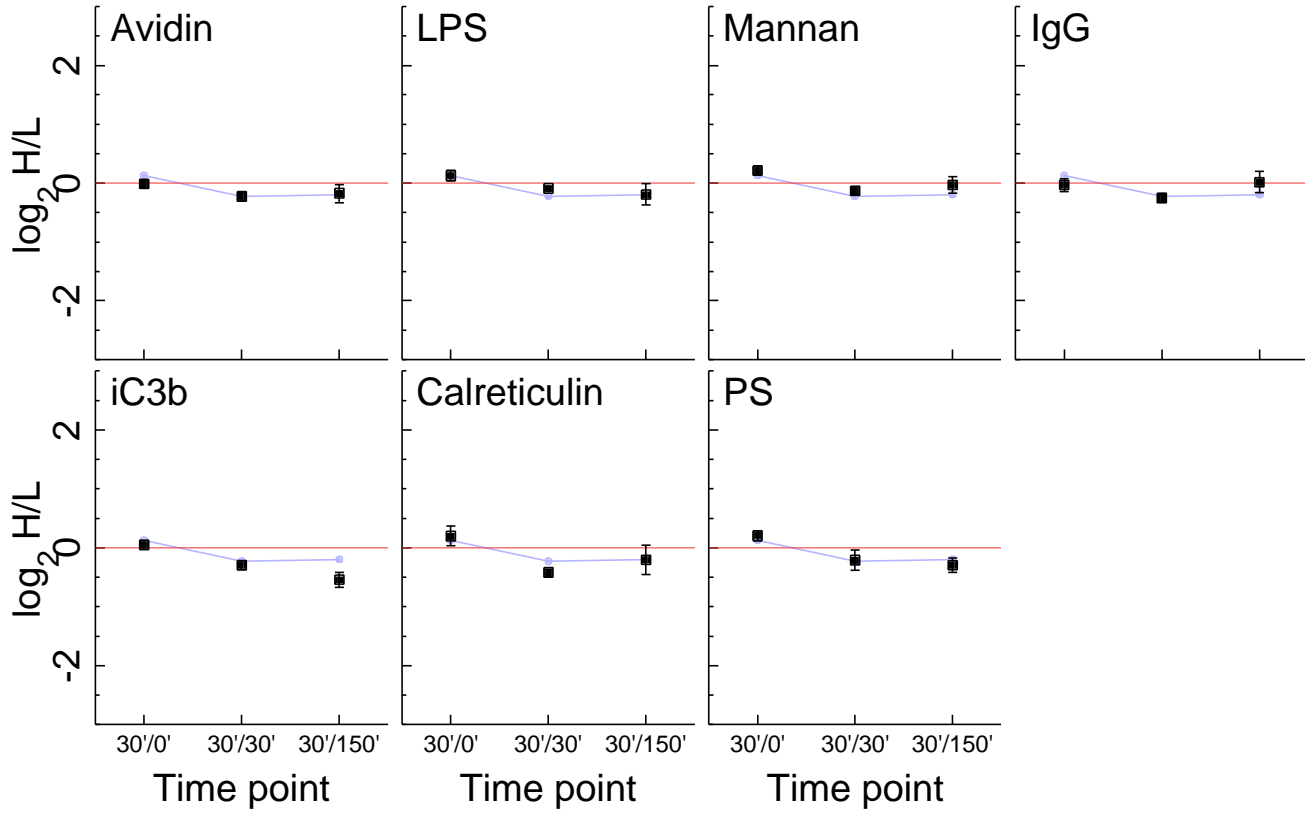

ywha9 (F6VW30)

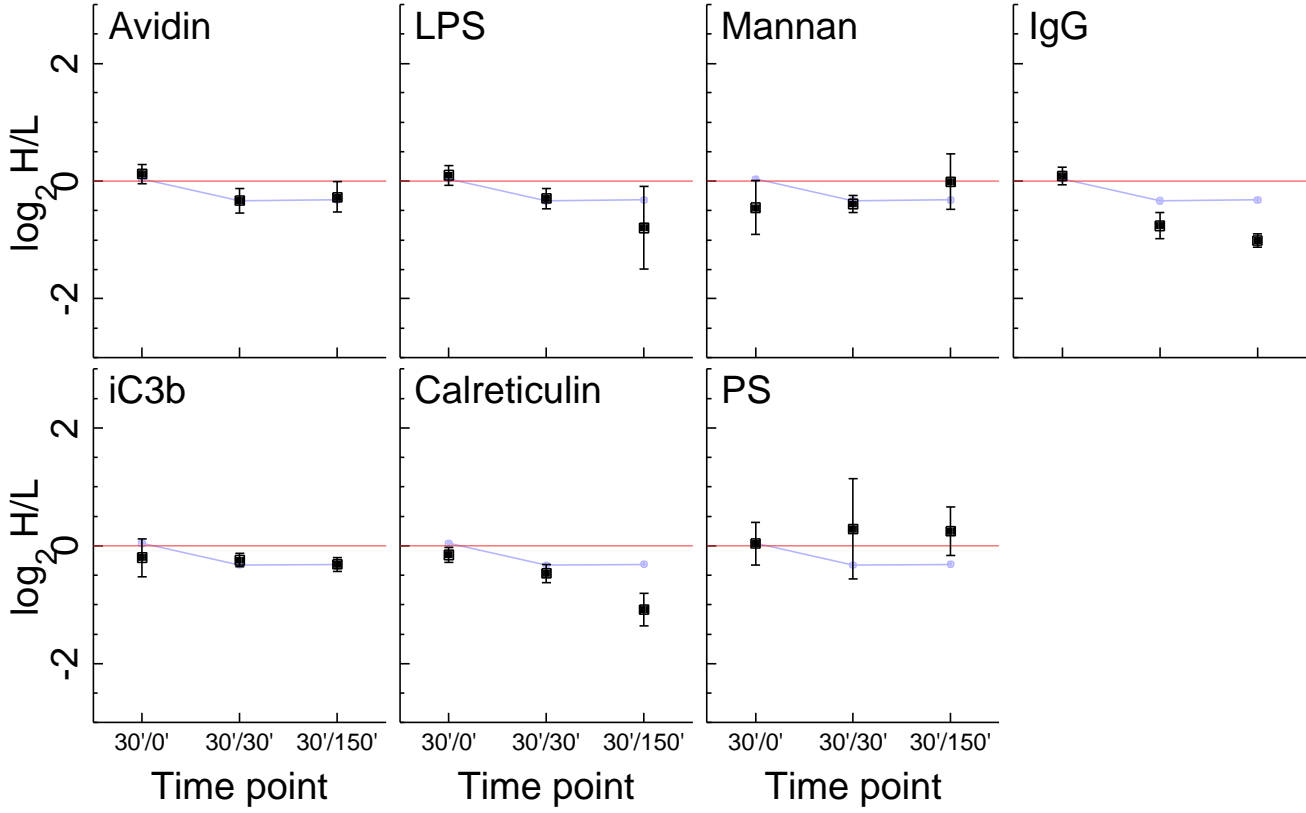

ywhaz (P63101)

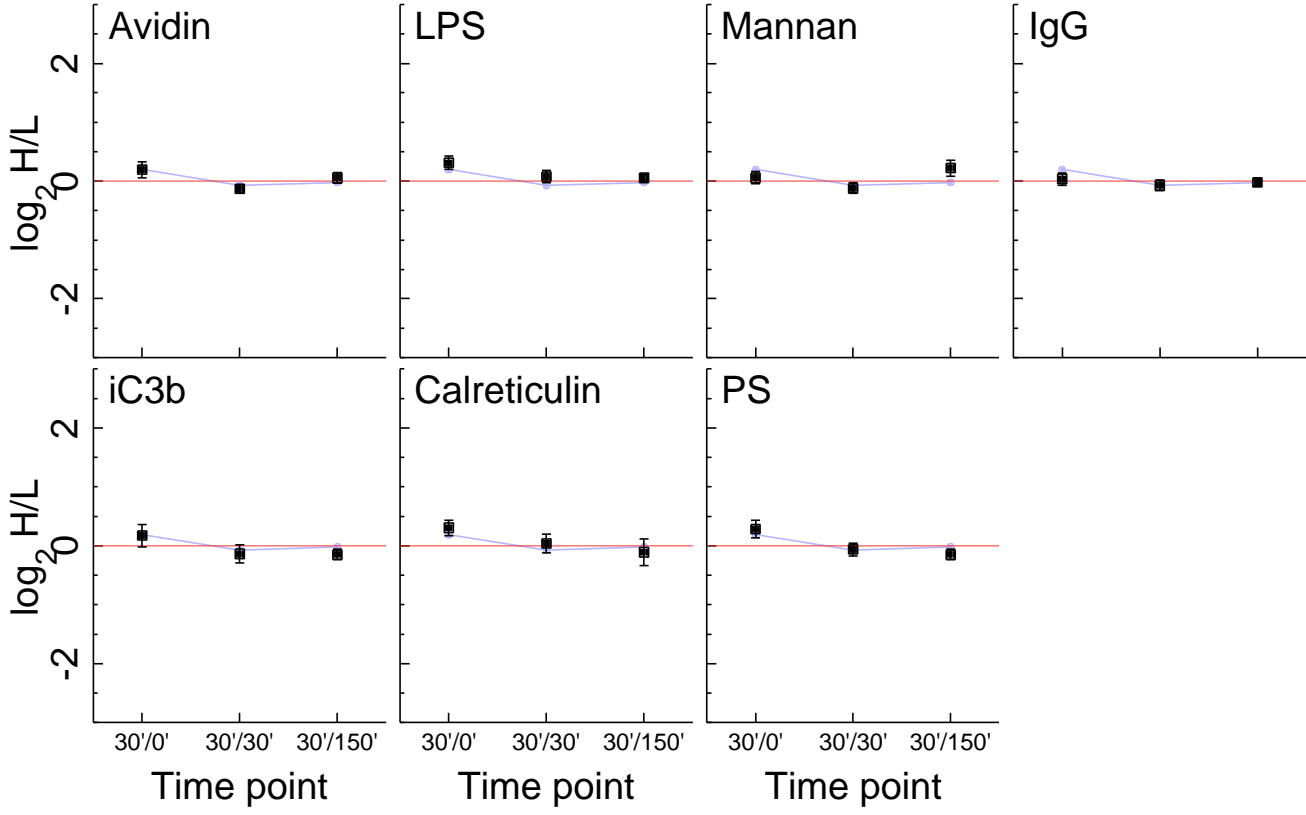

### zadh2 (Q8BGC4)

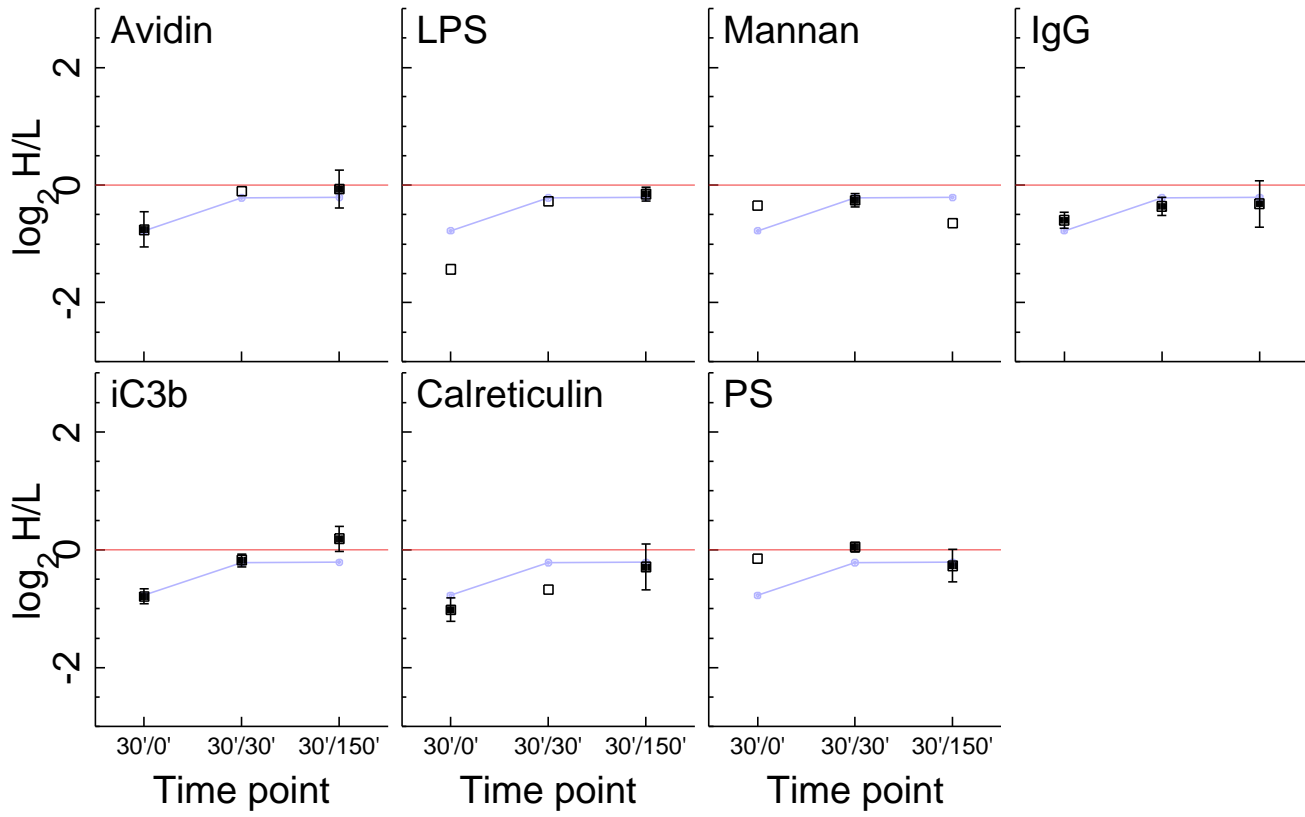



### zc3hav1 (D3Z5I1)

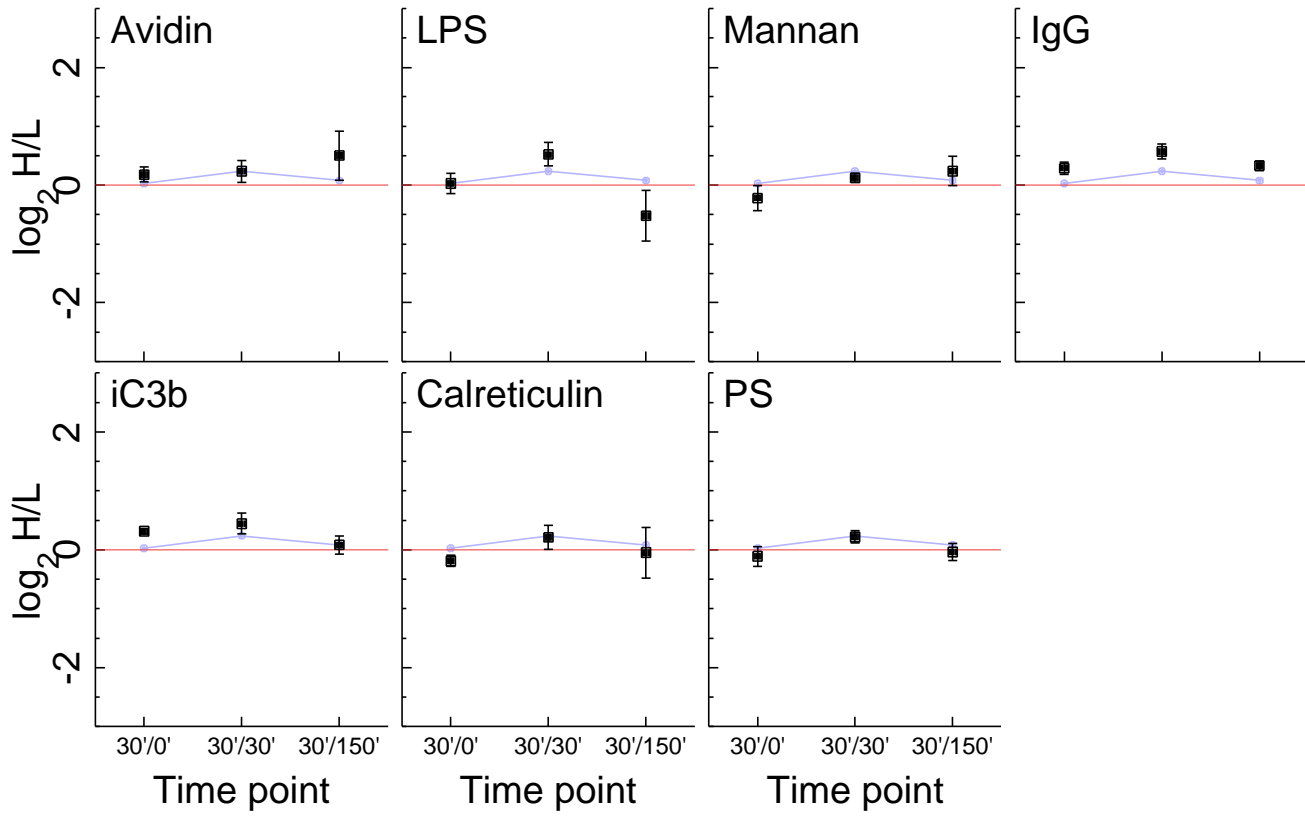

zdhhc20 (Q5Y5T1)

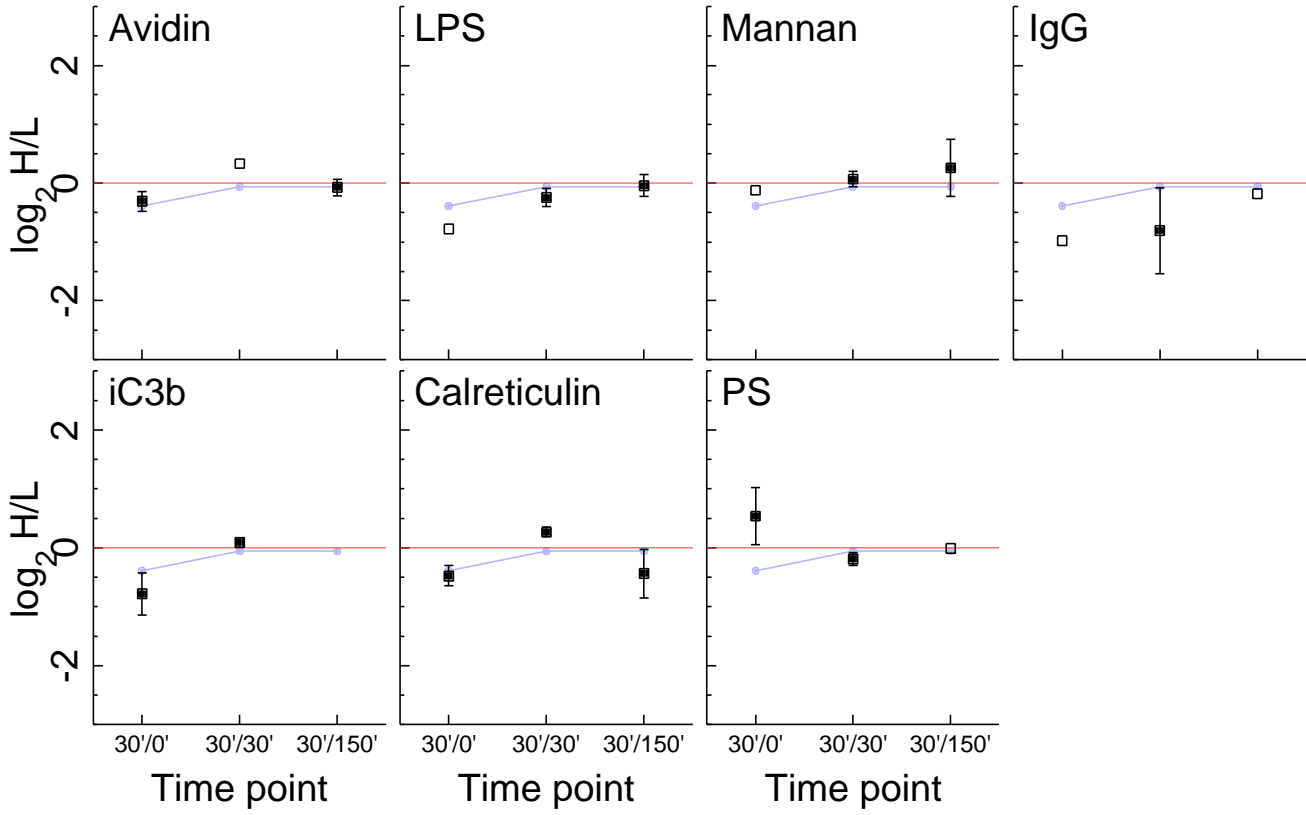

zfand2a (Q9JII7)

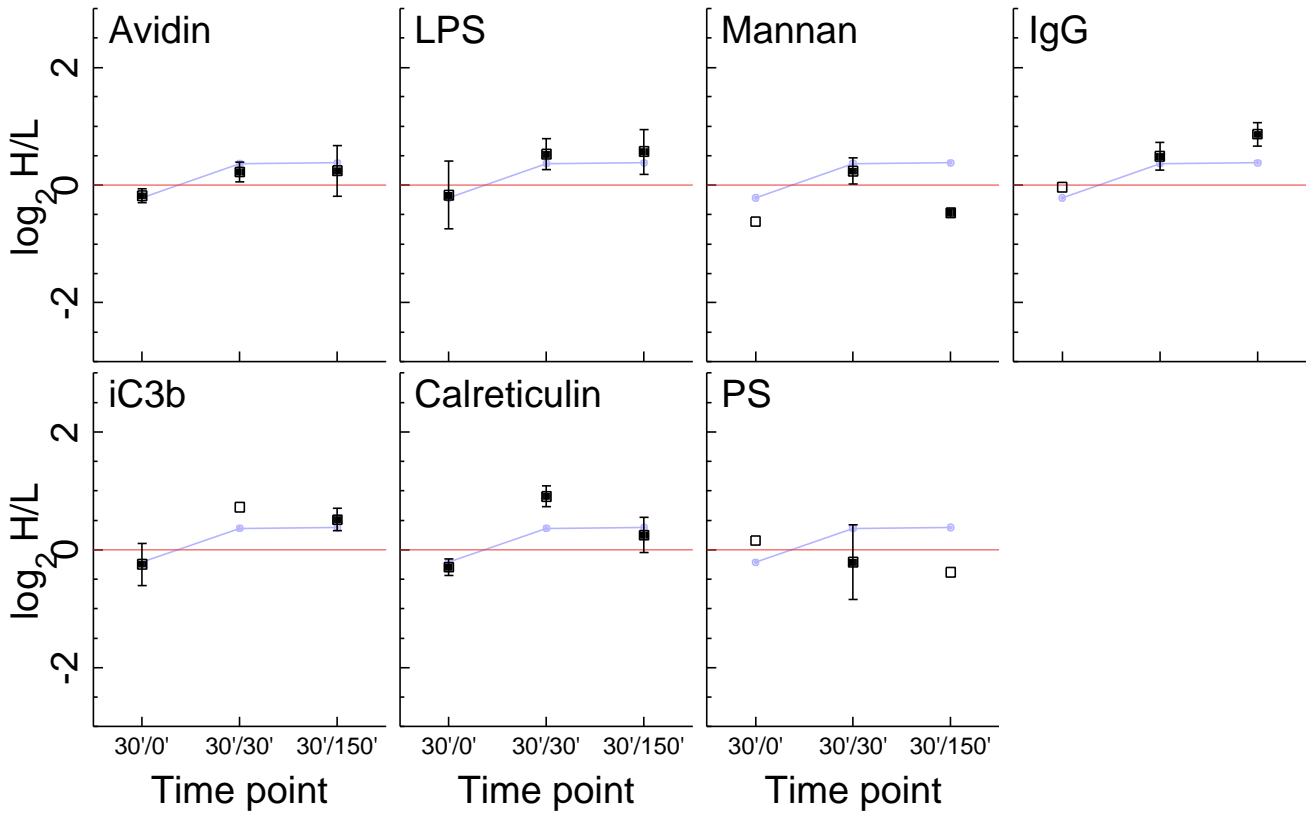

### zfyve19 (Q9DAZ9)

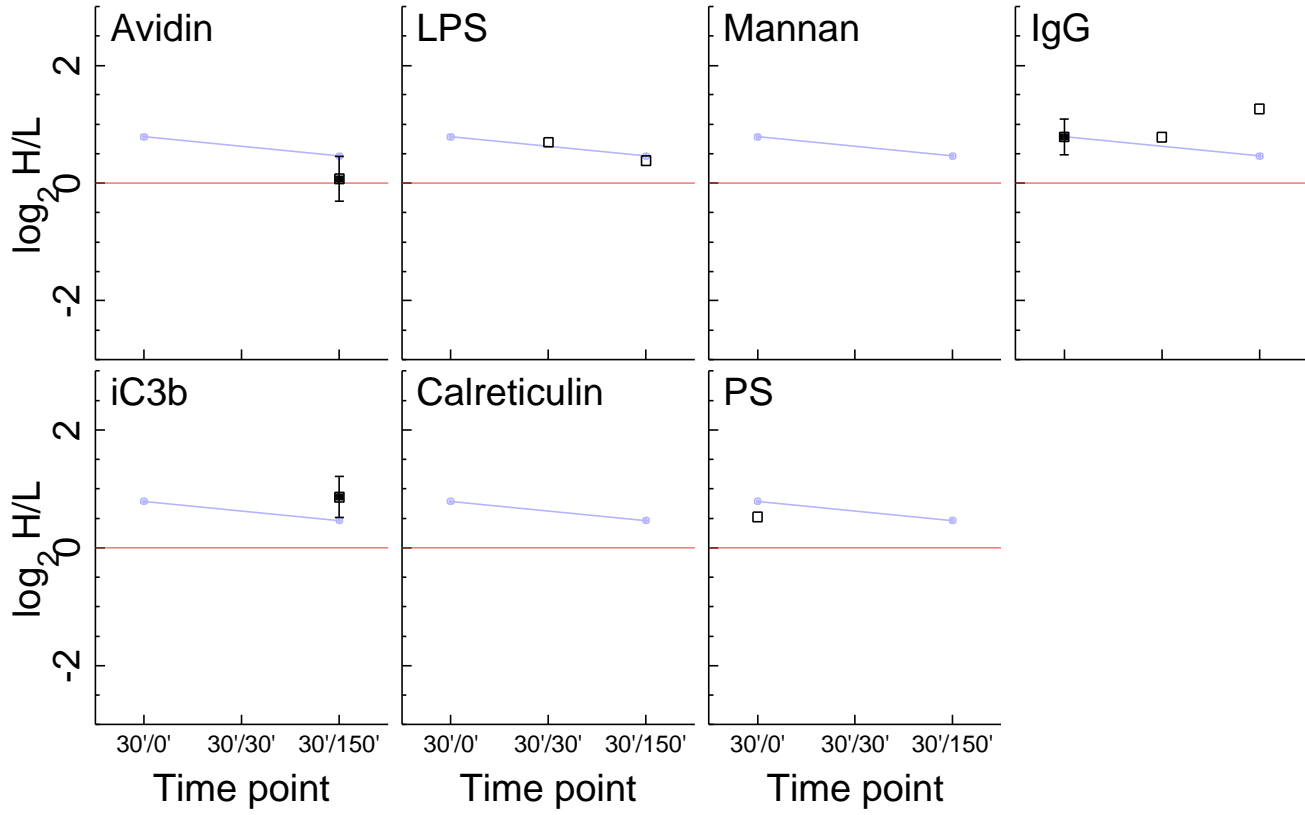

### zmiz1 (Q6P1E1)

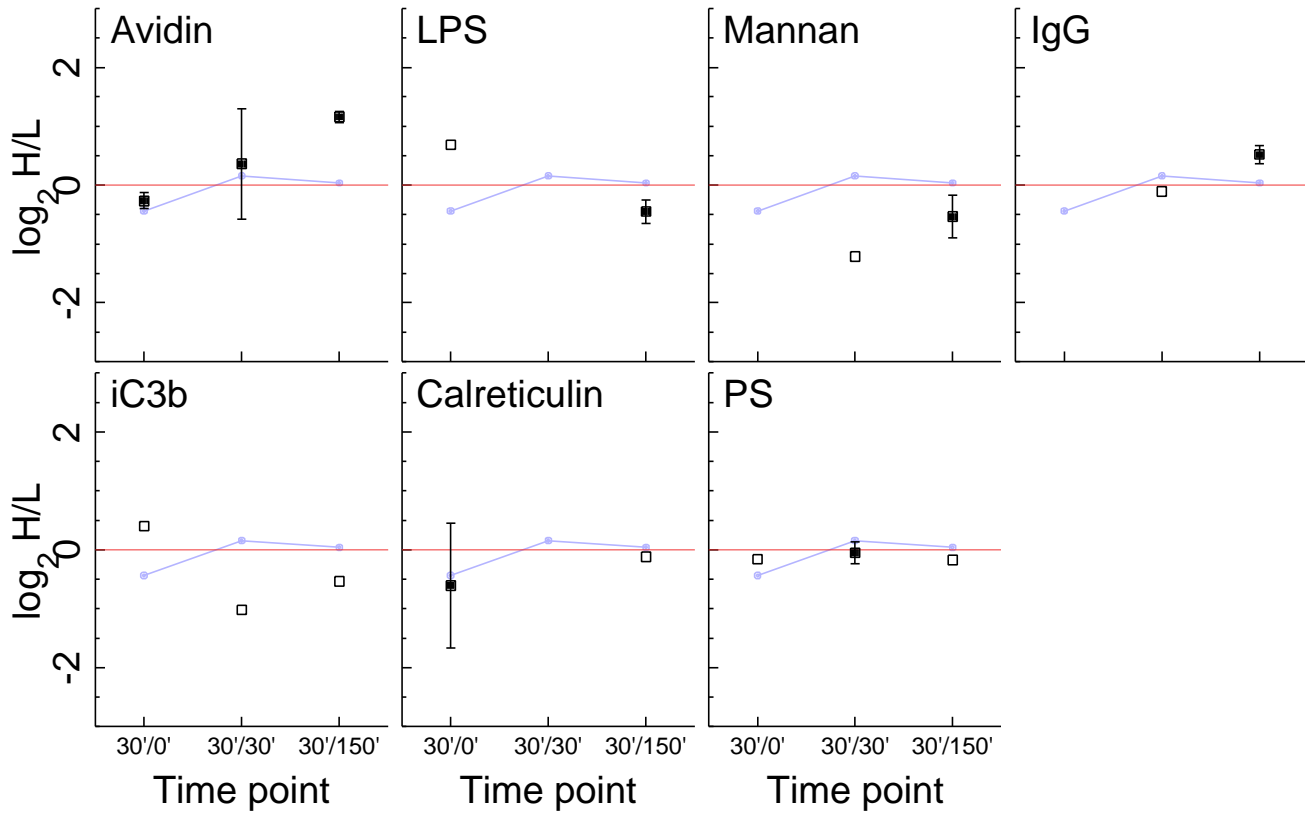

### zmpste24 (Q80W54)

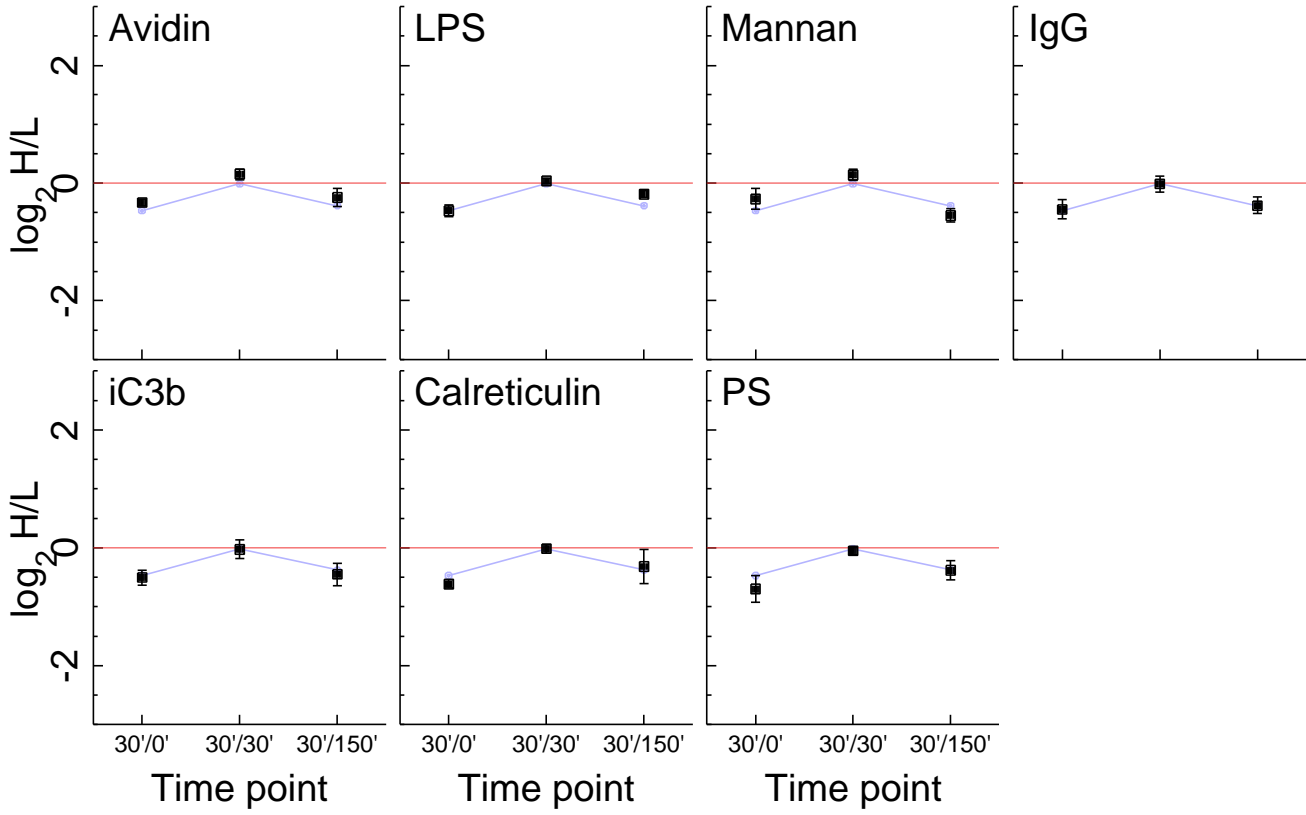

znf703 (P0CL69)

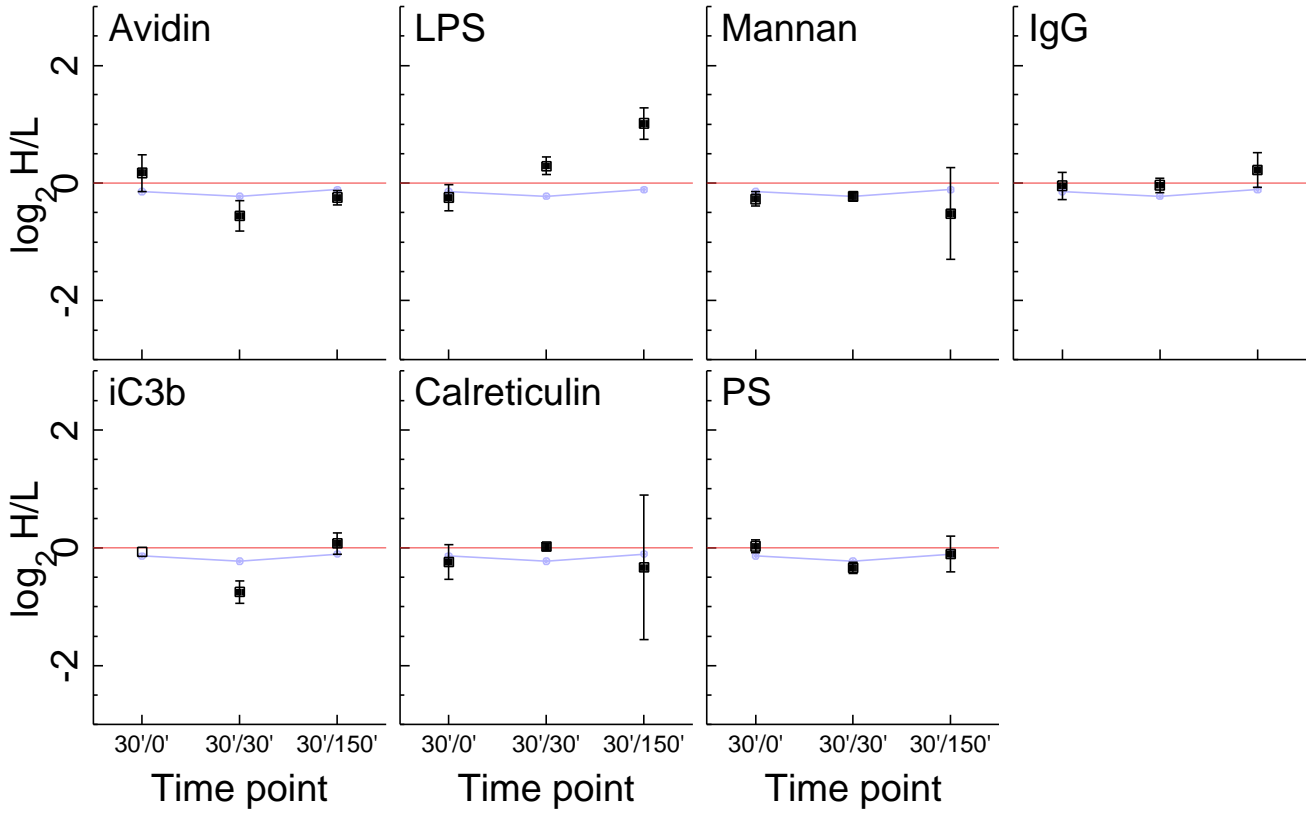

### znrf1 (Q91V17)

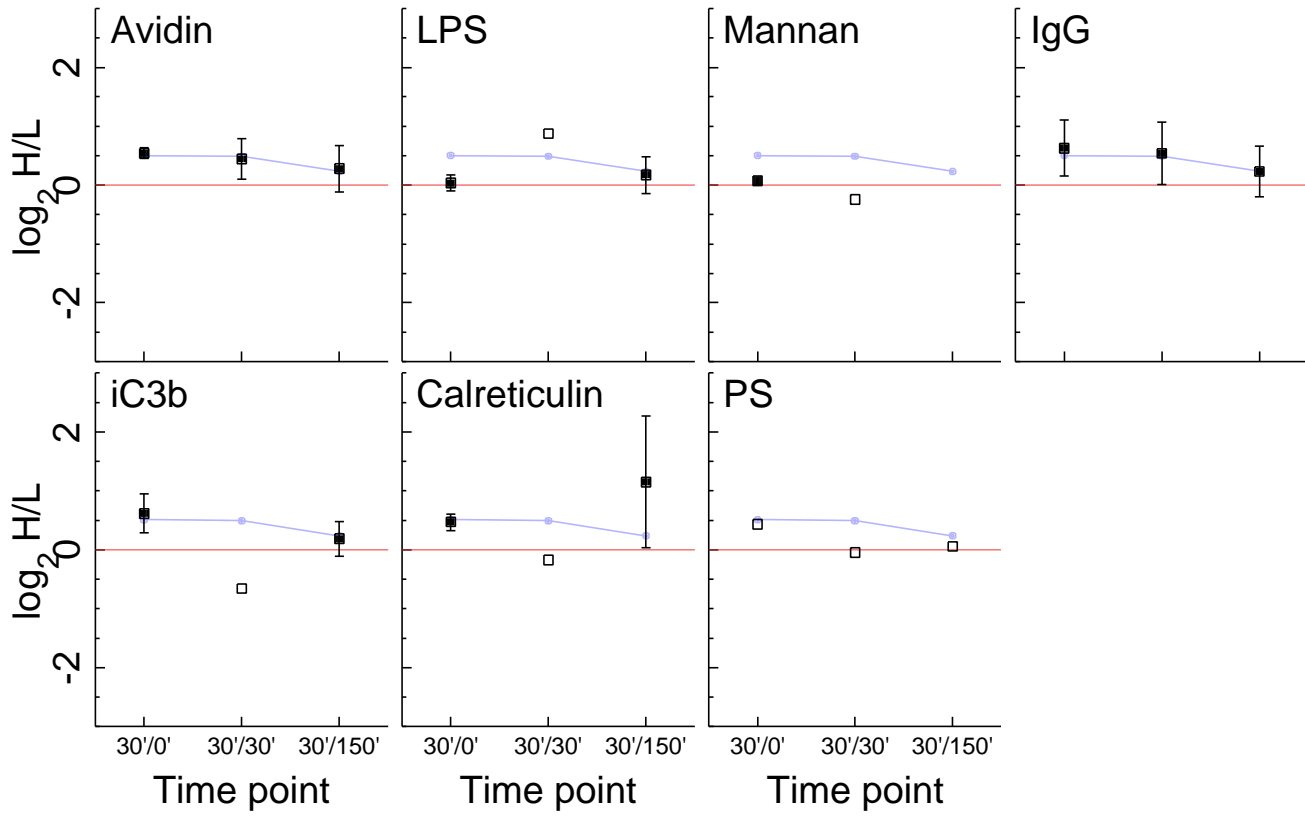



### znrf2 (Q71FD5)

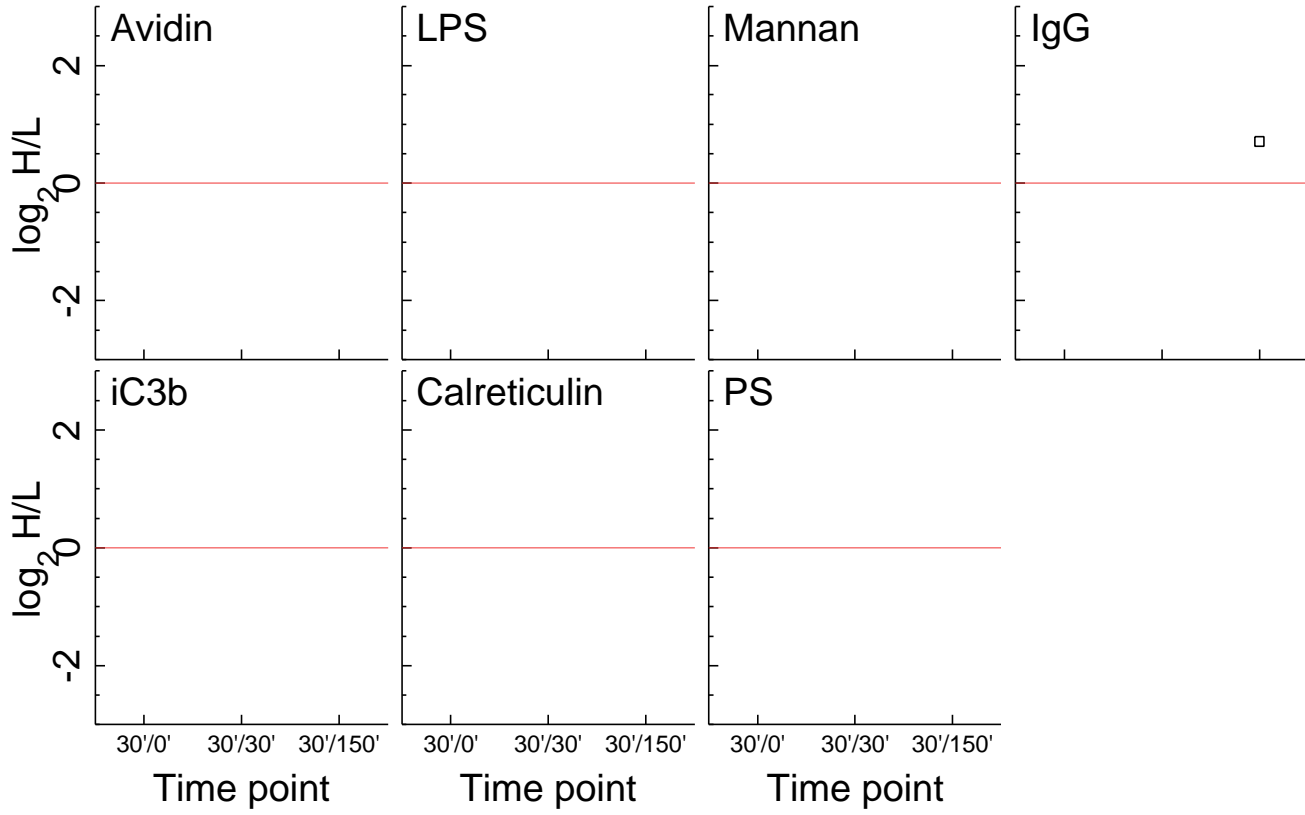

zyx (Q62523)

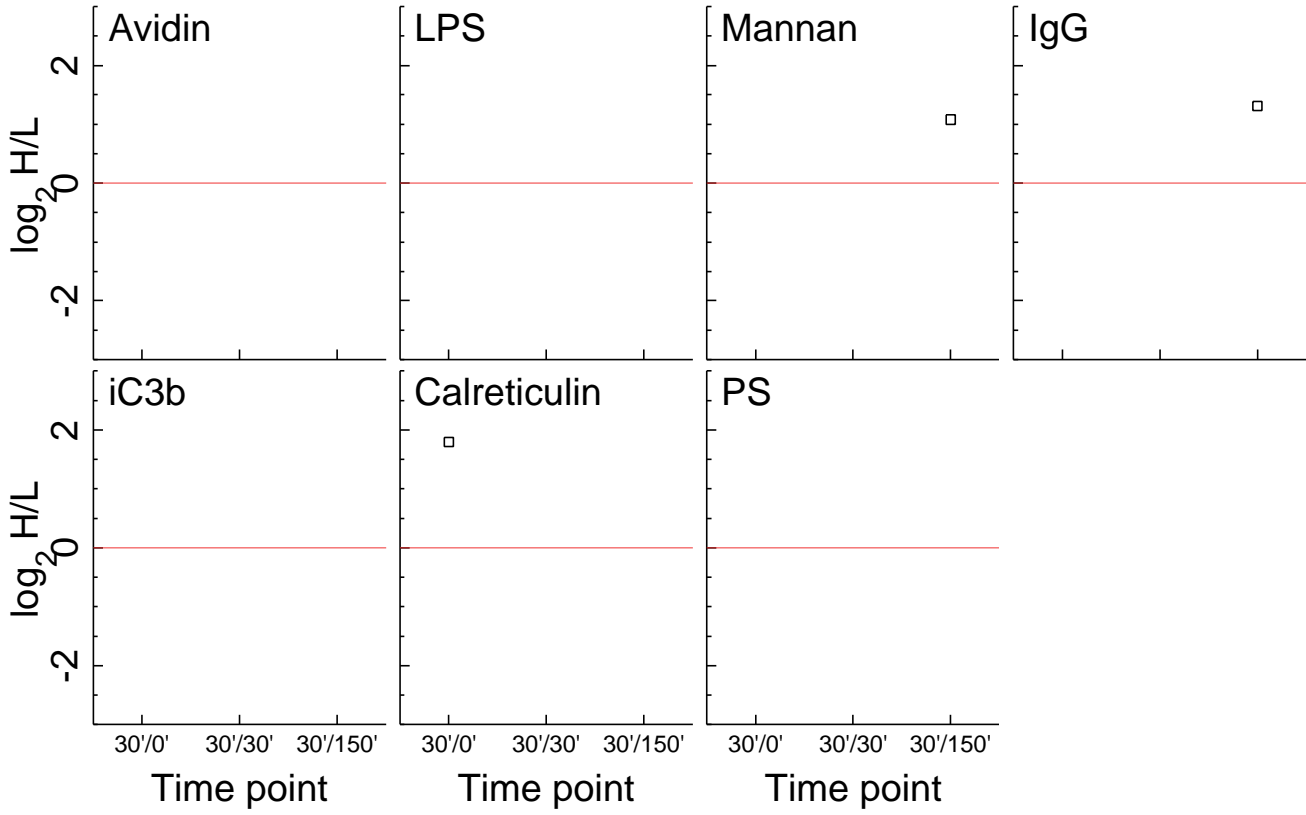

Supplement: supp_M114.044594_mcp.M114.044594-3.pdf [file supp_M114.044594_mcp.M114.044594-3.pdf]
