# Supplementary material for: Quantitative Proteome Analysis of Temporally Resolved Phagosomes Following Uptake Via Key Phagocytic Receptors
Source: PubMed Central journal article supplement (PMC4424403; doi:10.1074/mcp.m114.044594), 2015-05

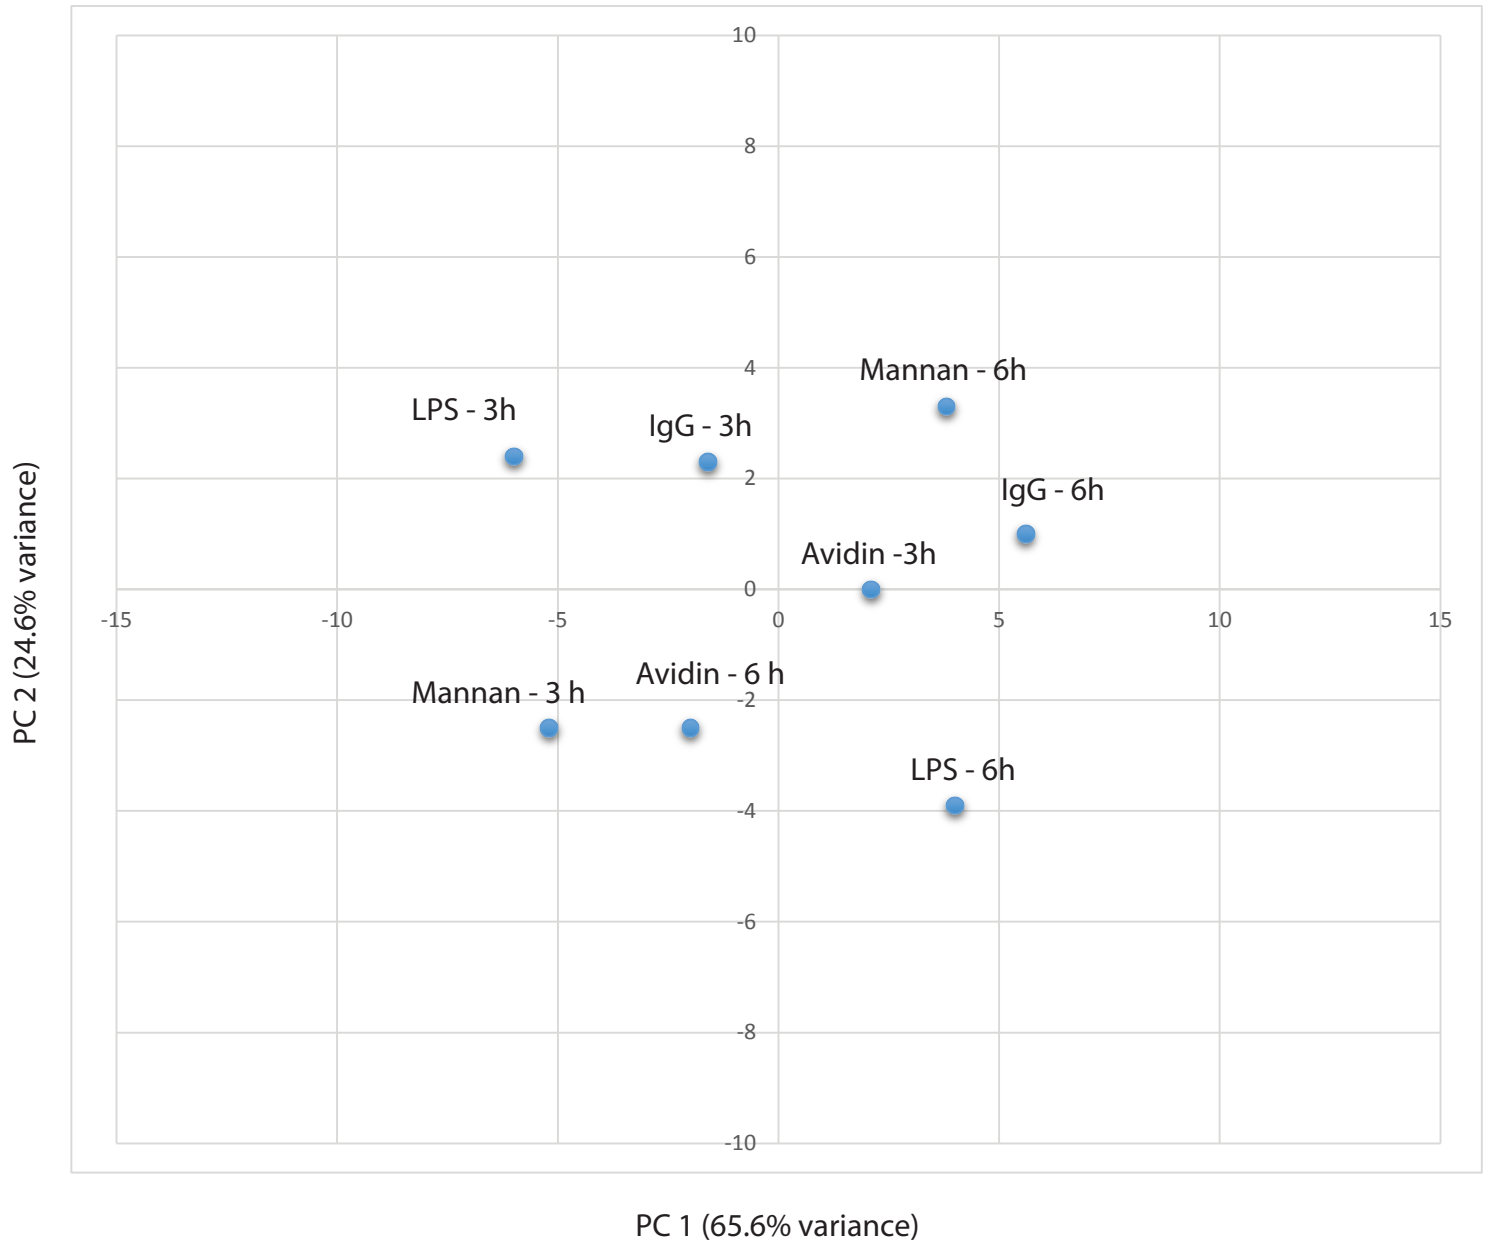

Supplement: supp_M114.044594_mcp.M114.044594-2.pdf [file supp_M114.044594_mcp.M114.044594-2.pdf]
